# Supplementary material
Source: PubMed Central journal article supplement (PMC2659615)
Supplement: NIHMS94044-supplement-Table_1.pdf [file NIHMS94044-supplement-Table_1.pdf]

**Supplemental Table 1.** The primers used in the Q-RT-PCR reactions.

| Gene                           | Primers                    |                             |
|--------------------------------|----------------------------|-----------------------------|
|                                | Forward                    | Reverse                     |
| <i>ANXA7</i>                   | 5'-ACATCAGGACATTTTGAACG-3' | 5'-TGGCAAGGATCATGTTAAAG-3'  |
| <i>CK2<math>\alpha</math></i>  | 5'-GAAAATCAGCACCTTGTCAG-3' | 5'-CATGCTAGATGAACCCATTC-3'  |
| <i>DAPK1</i>                   | 5'-GACCACCTACCCTGAGAGC-3'  | 5'-TCCAGGTTGATTTTGAACAC-3'  |
| <i>JAG1</i>                    | 5'-GTAAACGTGATGGAAACAGC-3' | 5'-CCAAGCCACAGTTAAGACAG-3'  |
| <i>NNT</i>                     | 5'-CACACATACGGAAATCAACC-3' | 5'-CTTTACCAAATCAGCAATGG-3'  |
| <i>MT1-MMP</i>                 | 5'-TCCCCTGACATACCTTAACC-3' | 5'-AGATCTCCGAGGAACTTGAC-3'  |
| <i>NR3C1</i>                   | 5'-CAGCGGTTTTATCAACTGAC-3' | 5'-GGGGAATTCAATACTCATGG-3'  |
| <i>PI3K<math>\delta</math></i> | 5'-ACAACATCATGATCCGAGAG-3' | 5'-TCATAGGTGAGGATGAATGG-3'  |
| <i>SLCO2A1</i>                 | 5'-CTATGACAACGATGCTCTCC-3' | 5'-GCACGTTGTACTCCTTGTTTC-3' |
| <i>SMARCA1</i>                 | 5'-AATCCTGATATCCCAAATCC-3' | 5'-AGTTTGTGAAACCCTGTGTG-3'  |
| <i>SNRPB2</i>                  | 5'-TTTAAGGAACTGGGCTCATC-3' | 5'-TTTGTGAGCAAAAAGTTCCAC-3' |
| <i>STK38</i>                   | 5'-ATGAATTCCAAAAGGAAAGC-3' | 5'-TCACAGAGCTTGTTGTACCC-3'  |
| <i>GAPDH</i>                   | 5'-GAAGGTGAAGGTCGGAGTC-3'  | 5'-ATGGGATTTCCATTGATGAC-3'  |
