# Supplementary material
Source: PubMed Central journal article supplement (PMC2659615)
Supplement: NIHMS94044-supplement-Table_2.pdf [file NIHMS94044-supplement-Table_2.pdf]

## List of selected genes on scatter plot: HT-X; HT-MT-Y; HT-siRNA-Z

| TargetID      | Signal_ | Signal_ | Signal_ | Symbol    | Accession                   | Synonyms                             | GO           | GO          | GO           |
|---------------|---------|---------|---------|-----------|-----------------------------|--------------------------------------|--------------|-------------|--------------|
| GI_10047089-S | 89.9    | 103.5   | 87.3    | SMPX      | <a href="#">NM_014332.1</a> |                                      | DNA          | nucleus     | striated     |
| GI_10047091-S | 517.6   | 748.7   | 756     | NP25      | <a href="#">NM_013259.1</a> | NP22                                 |              |             | central      |
| GI_10047093-S | 659.1   | 725.4   | 696.9   | HSP70-4   | <a href="#">NM_016299.1</a> |                                      | ATP          |             | proteolysis  |
| GI_10047099-S | 283.9   | 274.7   | 242.8   | LOC51186  | <a href="#">NM_016303.1</a> |                                      | DNA          | nucleus     | regulation   |
| GI_10047103-S | 2088.6  | 2034.1  | 1908.2  | SS18L2    | <a href="#">NM_016305.1</a> | KIAA-iso                             |              |             |              |
| GI_10047105-S | 611.3   | 2625.4  | 2103.2  | CPA4      | <a href="#">NM_016352.1</a> | CPA3                                 | carboxype    | cellular_co | histogene    |
| GI_10047121-S | 89.9    | 88      | 93.2    | MCFP      | <a href="#">NM_018843.1</a> |                                      | binding      | mitochond   | transport    |
| GI_10047123-S | 875.5   | 825.4   | 702.1   | LOC55974  | <a href="#">NM_018845.1</a> | SCP                                  |              |             |              |
| GI_10047133-A | 146.8   | 158.5   | 147.4   | EB-1      | <a href="#">NM_020140.1</a> | AIDA;MGC26087                        |              |             |              |
| GI_10047133-I | 116.4   | 141.6   | 112.7   | EB-1      | <a href="#">NM_020140.1</a> | AIDA;MGC26087                        |              |             |              |
| GI_10092578-S | 126.3   | 140.7   | 133.1   | ITIH3     | <a href="#">NM_002217.1</a> | H3P                                  | endopepti    |             |              |
| GI_10092585-S | 166.9   | 186.8   | 150.3   | ZNF236    | <a href="#">NM_007345.1</a> | ZNF236A;ZNF236B                      | transcripti  | nucleus     | regulation   |
| GI_10092596-S | 350     | 410.9   | 509     | MCOLN1    | <a href="#">NM_020533.1</a> | ML4;MLIV                             |              |             |              |
| GI_10092600-S | 1119.6  | 1175.8  | 1083.2  | EIF4G3    | <a href="#">NM_003760.2</a> | eIF4GII                              | mRNA         | eukaryotic  | regulation   |
| GI_10092602-S | 155.5   | 183.9   | 160     | PRG3      | <a href="#">NM_006093.2</a> | MBPH                                 | sugar        |             | immune       |
| GI_10092603-S | 146     | 183.7   | 184.4   | C10orf1   | <a href="#">NM_020527.1</a> | HUG1                                 | transcripti  | nucleus     | transcripti  |
| GI_10092611-A | 798.4   | 752.1   | 875.1   | CKLF      | <a href="#">NM_016326.2</a> | C32;CKLF1;CKLF2;CKLF3;CKLF4;UCK-     | cytokine     | integral to | chemotaxi    |
| GI_10092616-S | 135.9   | 157.5   | 140.1   | PCBP3     | <a href="#">NM_020528.1</a> | ALPHA-CP3                            | nucleic      | nucleus     | mRNA         |
| GI_10092618-S | 911.6   | 668.6   | 511.1   | NFKBIA    | <a href="#">NM_020529.1</a> | IKBA;MAD-3;NFKBI                     | transcripti  | cytoplasm   | response     |
| GI_10092638-S | 482.7   | 659     | 460.4   | CRIM1     | <a href="#">NM_016441.1</a> |                                      | insulin-like | extracellul | neurogene    |
| GI_10092658-S | 162.9   | 149.1   | 141.4   | FLJ12886  | <a href="#">NM_019108.1</a> | F17127_1;DKFZp564H1322               |              |             |              |
| GI_10092668-S | 176.1   | 192.3   | 186.7   | OR2S2     | <a href="#">NM_019897.1</a> | OST715                               | olfactory    | integral to | olfaction    |
| GI_10092672-S | 949     | 878.3   | 802.8   | LOC57019  | <a href="#">NM_020313.1</a> |                                      |              |             |              |
| GI_10092690-S | 122.6   | 120.1   | 108.2   | TJP3      | <a href="#">NM_014428.1</a> | ZO-3                                 | protein      | tight       | intracellula |
| GI_10190657-S | 107.2   | 116.3   | 110.7   | HSA404617 | <a href="#">NM_018722.1</a> | KCNQ1DN                              | molecular    | cellular_co | biological_  |
| GI_10190665-I | 155.8   | 163.8   | 141.6   | ATP6V0A4  | <a href="#">NM_020632.1</a> | a4;Stv1;VPP2;Vph1;RTA1C;RTADR;ATP6N2 |              |             |              |
| GI_10190669-S | 108.6   | 102.7   | 107.8   | GDF3      | <a href="#">NM_020634.1</a> |                                      | cytokine     | extracellul | cell growth  |
| GI_10190671-S | 108.4   | 111     | 102.3   | FGF22     | <a href="#">NM_020637.1</a> |                                      |              |             |              |
| GI_10190679-S | 417     | 505.5   | 444.2   | ASCL3     | <a href="#">NM_020646.1</a> |                                      | DNA          | nucleus     | regulation   |
| GI_10190681-S | 135.8   | 129.6   | 142     | CBX8      | <a href="#">NM_020649.1</a> | PC3;RC1;HPC3                         | chromatin    | chromatin   | chromatin    |
| GI_10190685-S | 253.8   | 299.2   | 254.9   | ZNF286    | <a href="#">NM_020652.1</a> | KIAA1874                             | DNA          | nucleus     | regulation   |
| GI_10190687-S | 94.8    | 88.7    | 91.8    | ZNF287    | <a href="#">NM_020653.1</a> |                                      | transcripti  | nucleus     | regulation   |
| GI_10190695-S | 158.9   | 150.4   | 163.6   | ZNF304    | <a href="#">NM_020657.1</a> |                                      | DNA          | nucleus     | regulation   |
| GI_10190697-S | 128.6   | 162.7   | 149.1   | CX36      | <a href="#">NM_020660.1</a> | GJA9                                 | connexon     | connexon    | cell         |
| GI_10190699-S | 130.6   | 139.7   | 139.1   | AICDA     | <a href="#">NM_020661.1</a> | AID;ARP2;CDA2;HIGM2                  | cytidine     | cellular_co | mRNA         |
| GI_10190701-S | 170.2   | 184.8   | 194.6   | MRS2L     | <a href="#">NM_020662.1</a> | HPT;MRS2                             |              |             |              |
| GI_10190705-S | 248.9   | 320.9   | 289     | CLK4      | <a href="#">NM_020666.1</a> |                                      | ATP          | nucleus     | protein      |
| GI_10190709-S | 95.7    | 100.9   | 108.6   | LOC57399  | <a href="#">NM_020669.1</a> |                                      |              |             |              |
| GI_10190711-S | 314.4   | 415.4   | 378.4   | S100A14   | <a href="#">NM_020672.1</a> | BCMP84;S100A15                       | calcium      |             |              |
| GI_10190741-S | 91.6    | 103.2   | 104.6   | USP29     | <a href="#">NM_020903.1</a> |                                      | cysteine-    | cellular_co | ubiquitin-   |
| GI_10190743-S | 147.9   | 192.7   | 121.2   | PLEKHA4   | <a href="#">NM_020904.1</a> | PEPP1                                | DNA          | nucleus     | regulation   |

|               |        |        |        |          |                             |                                  |             |              |             |
|---------------|--------|--------|--------|----------|-----------------------------|----------------------------------|-------------|--------------|-------------|
| GI_10190745-S | 600.1  | 644.9  | 567.2  | RDH14    | <a href="#">NM_020905.1</a> | PAN2                             | oxidoredu   | metabolis    |             |
| GI_10190747-S | 134.1  | 153    | 150.8  | SCUBE2   | <a href="#">NM_020974.1</a> | CEGP1                            | calcium     |              |             |
| GI_10198655-S | 94.9   | 97.7   | 90.5   | AMHR2    | <a href="#">NM_020547.1</a> | AMHR                             | protein     | integral to  | signal      |
| GI_10257436-S | 332.6  | 402.6  | 378    | TTYH1    | <a href="#">NM_020659.1</a> |                                  | iron ion    | integral to  | iron ion    |
| GI_10280617-S | 229.9  | 296.2  | 277.8  | ATP12A   | <a href="#">NM_001676.2</a> | ATP1AL1                          | hydrogen/   | hydrogen/    | proton      |
| GI_10280625-S | 193.3  | 235.7  | 230.8  | APS      | <a href="#">NM_020979.1</a> |                                  | JAK         | cytoplasm    | signal      |
| GI_10337584-S | 110.3  | 135.6  | 124.1  | DEFA5    | <a href="#">NM_021010.1</a> | DEF5;HD-5                        | antimicrob  | extracellul  | antimicrob  |
| GI_10337586-S | 94.6   | 87.6   | 85.2   | FGF6     | <a href="#">NM_020996.1</a> | HST2;HBGF-6                      | growth      | extracellul  | oncogene    |
| GI_10337596-S | 212.4  | 274.3  | 200.9  | SCN2A2   | <a href="#">NM_021007.1</a> | HBSCII                           | voltage-    | voltage-     | sodium      |
| GI_10337606-S | 324.6  | 393.9  | 465.3  | PTTG3    | <a href="#">NM_021000.1</a> |                                  |             |              |             |
| GI_10337608-S | 479.1  | 515.5  | 557.9  | CTAG2    | <a href="#">NM_020994.1</a> | ESO2;CAMEL;LAGE1;LAGE-1;LAGE-    |             |              |             |
| GI_10337610-S | 371.4  | 459.6  | 393.9  | NEUROG3  | <a href="#">NM_020999.1</a> | ngn3;Atoh5;Math4B                | transcripti | nucleus      | peripheral  |
| GI_10346128-S | 103.4  | 259.8  | 110.7  | DDX43    | <a href="#">NM_018665.1</a> | HAGE;DKFZp434H2114               | ATP         |              |             |
| GI_10346134-S | 232.7  | 445.4  | 333    | MAPRE2   | <a href="#">NM_014268.1</a> | EB1;EB2;RP1                      | microtubul  | cellular     |             |
| GI_10440557-S | 110.1  | 140.7  | 131.2  | RFPL1    | <a href="#">NM_021026.1</a> | RNF78                            |             |              |             |
| GI_10440561-S | 146.2  | 181.4  | 155.3  | FHR-3    | <a href="#">NM_021023.1</a> | FHR3;HLF4;DOWN16                 | extracellul |              |             |
| GI_10440563-S | 116.5  | 122.6  | 115    | TLX3     | <a href="#">NM_021025.1</a> | RNX;HOX11L2                      | transcripti | nucleus      | regulation  |
| GI_10440565-S | 141.1  | 187.4  | 138.7  | LZTS1    | <a href="#">NM_021020.1</a> | F37;FEZ1                         | transcripti |              |             |
| GI_10442821-S | 578.6  | 612.4  | 598.7  | BIRC6    | <a href="#">NM_016252.1</a> | KIAA1289                         | cysteine    | intracellula | ubiquitin   |
| GI_10518496-S | 159.6  | 156.3  | 146.2  | DLL1     | <a href="#">NM_005618.2</a> | DELTA1                           | structural  | extracellul  | cell        |
| GI_10518498-S | 1051.6 | 1169.5 | 690.2  | RNF24    | <a href="#">NM_007219.2</a> | G1L                              |             |              |             |
| GI_10518499-S | 199.7  | 339.4  | 176.9  | F3       | <a href="#">NM_001993.2</a> | TF;TFA;CD142                     | blood       | integral to  | blood       |
| GI_10518500-S | 165.3  | 192.4  | 162.2  | F5       | <a href="#">NM_000130.2</a> | FVL;PCCF                         | blood       | blood        |             |
| GI_10518501-I | 91.5   | 107.5  | 97.4   | F7       | <a href="#">NM_000131.2</a> |                                  | serine-     | extracellul  | blood       |
| GI_10518502-A | 172.6  | 205.3  | 180.5  | F7       | <a href="#">NM_019616.1</a> |                                  | serine-     | extracellul  | blood       |
| GI_10518504-I | 100.3  | 88.6   | 92.9   | F8       | <a href="#">NM_000132.2</a> | AHF;F8B;F8C;HEMA;FVIII;DXS1253E  | blood       | blood        |             |
| GI_10518505-A | 433.3  | 538    | 520.1  | F8       | <a href="#">NM_019863.1</a> | AHF;F8B;F8C;HEMA;FVIII;DXS1253E  | blood       | blood        |             |
| GI_10518505-I | 169.3  | 187.1  | 183.3  | F8       | <a href="#">NM_019863.1</a> | AHF;F8B;F8C;HEMA;FVIII;DXS1253E  | blood       | blood        |             |
| GI_10518507-S | 94.9   | 99.5   | 102.7  | F9       | <a href="#">NM_000133.2</a> | FIX;PTC;HEMB                     | blood       | extracellul  | blood       |
| GI_10567815-I | 171.3  | 208.8  | 193.5  | GNAO1    | <a href="#">NM_020988.1</a> | GNAO;G-ALPHA-o                   | heterotrim  | peripheral   | axon        |
| GI_10567821-S | 98.4   | 101.9  | 91.1   | ZNF253   | <a href="#">NM_021047.1</a> | BMZF1;BMZF-1;FLJ90391            | zinc ion    | nucleus      | regulation  |
| GI_10567823-S | 151.1  | 184.9  | 167.5  | LOC57830 | <a href="#">NM_021046.1</a> |                                  | structural  | intermedia   | biological_ |
| GI_10645198-S | 96.6   | 99.7   | 97.1   | ADAMTS7  | <a href="#">NM_014272.1</a> | ADAM-TS7;DKFZp434H204            | metallope   | extracellul  | proteolysis |
| GI_10800141-S | 146.2  | 169.7  | 150.2  | IFNA7    | <a href="#">NM_021057.1</a> | IFNA-J                           | interferon- | extracellul  | response    |
| GI_10800147-S | 238.9  | 263.9  | 230.9  | KIAA0186 | <a href="#">NM_021067.1</a> |                                  |             |              |             |
| GI_10800407-S | 112.1  | 112.2  | 103    | CGA      | <a href="#">NM_000735.2</a> | HCG;LHA;FSHA;GPHa;TSHA;GPHA1;CG- | hormone     | soluble      | signal      |
| GI_10800411-S | 325.1  | 496.1  | 514.7  | MAPRE3   | <a href="#">NM_012326.2</a> | EB3;RP3;EBF3                     | microtubul  | microtubul   |             |
| GI_10800413-S | 485.8  | 573.6  | 523.9  | SC5DL    | <a href="#">NM_006918.2</a> | ERG3;SC5D                        | C-5 sterol  | endoplas     | lipid       |
| GI_10800414-S | 172.3  | 255.5  | 747.8  | NDN      | <a href="#">NM_002487.2</a> | HsT16328                         | DNA         | nucleus      | negative    |
| GI_10800415-S | 1091.6 | 1250.8 | 807.7  | SCG2     | <a href="#">NM_003469.2</a> | CHGC;SgII                        | calcium     | secretory    | protein     |
| GI_10800416-S | 425.3  | 561    | 483.6  | BRAP     | <a href="#">NM_006768.2</a> | IMP;BRAP2;RNF52                  | nuclear     | soluble      | nucleocyto  |
| GI_10800418-S | 228.3  | 282.1  | 248.3  | CHGA     | <a href="#">NM_001275.2</a> | CGA                              | calcium     | synaptic     | regulation  |
| GI_10801344-S | 8363.6 | 8084.4 | 6790.3 | eIF3k    | <a href="#">NM_013234.1</a> | M9;ARG134;PTD001;HSPC029;PLAC-   |             |              |             |
| GI_10834965-S | 2262.2 | 2409   | 2245.1 | GLB1     | <a href="#">NM_000404.1</a> |                                  | beta-       | lysosome     |             |

|               |        |        |        |          |                             |                                    |              |             |             |
|---------------|--------|--------|--------|----------|-----------------------------|------------------------------------|--------------|-------------|-------------|
| GI_10834967-S | 280.9  | 320.5  | 316.7  | MAN2B1   | <a href="#">NM_000528.1</a> | MANB;LAMAN                         | alpha-       | lysosome    | protein     |
| GI_10834979-S | 106.7  | 117.5  | 93.8   | IL9      | <a href="#">NM_000590.1</a> | P40;HP40;IL-9                      | interleukin- | extracellul | positive    |
| GI_10834981-S | 94.1   | 105    | 99.9   | IGFBP5   | <a href="#">NM_000599.1</a> | IBP5                               | insulin-like | extracellul | signal      |
| GI_10834983-S | 230.4  | 326.5  | 172.6  | IL6      | <a href="#">NM_000600.1</a> | HGF;HSF;BSF2;IL-6;IFNB2            | interleukin- | extracellul | negative    |
| GI_10834989-A | 165.9  | 217.9  | 125.5  | NCAM1    | <a href="#">NM_000615.1</a> | CD56;NCAM;MSK39                    | cell         | integral to | synaptic    |
| GI_10834999-S | 124.4  | 139.3  | 128.6  | PNLIP    | <a href="#">NM_000936.1</a> |                                    | triacylglyc  |             | triacylglyc |
| GI_10835001-S | 2819.9 | 1383   | 270.4  | ARHGDI5  | <a href="#">NM_001175.1</a> | D4;GDIA2;GDID4;LYGDI;RAP1GN1       | Rho GDP-     | cytoplasmic | negative    |
| GI_10835009-S | 694.4  | 870.5  | 585.5  | CTNND1   | <a href="#">NM_001331.1</a> | CAS;CTNND;P120CAS;P120CTN;KIAA0384 | structural   | kinesin     | cell        |
| GI_10835012-S | 111.1  | 126.2  | 118.1  | ESR2     | <a href="#">NM_001437.1</a> | Erb;ESRB;NR3A2;ER-BETA;ESR-BETA    | steroid      | nucleus     | signal      |
| GI_10835020-S | 294.3  | 361.9  | 304.1  | IGFBP4   | <a href="#">NM_001552.1</a> | IBP4                               | insulin-like | extracellul | skeletal    |
| GI_10835022-S | 1733.8 | 1146.9 | 1101.4 | ITPR1    | <a href="#">NM_002222.1</a> | IP3R;IP3R1;Insp3r1                 | inositol-    | endoplasm   | small       |
| GI_10835024-S | 5232.7 | 7320.5 | 6048.4 | NDUFV2   | <a href="#">NM_021074.1</a> |                                    | iron-sulfur  | NADH        | mitochond   |
| GI_10835040-S | 237.9  | 288.9  | 256    | ZNF202   | <a href="#">NM_003455.1</a> |                                    | specific     | nucleus     | lipid       |
| GI_10835046-S | 1711.7 | 1868.1 | 1400.2 | SGCE     | <a href="#">NM_003919.1</a> | ESG;DYT11                          |              | sarcoglyca  | muscle      |
| GI_10835048-S | 8196   | 9678.8 | 7287.9 | ARHA     | <a href="#">NM_001664.1</a> | RHOA;ARH12;RHO12;RHOH12            | Rho small    | cytoskelet  | Rho         |
| GI_10835070-S | 174.7  | 933.7  | 232.6  | CD74     | <a href="#">NM_004355.1</a> | DHLA;HLADG;Ia-GAMMA                | class II     | integral to | immune      |
| GI_10835082-S | 139    | 162.6  | 148    | RS1      | <a href="#">NM_000330.1</a> | RS;XLR51                           | cell         | extracellul | vision      |
| GI_10835084-S | 1084.6 | 894.1  | 1459.1 | MT1H     | <a href="#">NM_005951.1</a> | MT1                                | heavy        |             |             |
| GI_10835092-S | 1451.6 | 1707.6 | 1685.4 | PTTG2    | <a href="#">NM_006607.1</a> |                                    |              |             |             |
| GI_10835094-S | 562.6  | 531    | 490.2  | SAA4     | <a href="#">NM_006512.1</a> | CSAA                               | amyloid      | extracellul | acute-      |
| GI_10835100-S | 457.2  | 549.6  | 628.5  | GCN5L2   | <a href="#">NM_021078.1</a> | GCN5                               | transcripti  | nucleoso    | protein     |
| GI_10835102-S | 87.8   | 87.9   | 90     | IFNA4    | <a href="#">NM_021068.1</a> | INFA4                              | interferon-  | extracellul | response    |
| GI_10835118-S | 611.3  | 647    | 631.7  | MYO5A    | <a href="#">NM_000259.1</a> | GS1;MYO5;MYH12;MYOXIN              | myosin       | kinesin     | nonselecti  |
| GI_10835134-S | 103.6  | 129.6  | 119.2  | CRP      | <a href="#">NM_000567.1</a> | PTX1                               | binding      | extracellul | inflammat   |
| GI_10835138-S | 117    | 121.7  | 122.4  | FCGR3B   | <a href="#">NM_000570.1</a> | CD16;FCG3;FCGR3                    | receptor     |             | immune      |
| GI_10835156-S | 107.1  | 261.8  | 103.3  | IGFBP2   | <a href="#">NM_000597.1</a> | IBP2                               |              |             |             |
| GI_10835158-S | 2265.2 | 3582.8 | 3677   | SERPINE1 | <a href="#">NM_000602.1</a> | PAI;PAI1;PAI-1;PLANH1              | endopepti    |             | blood       |
| GI_10835168-S | 673.5  | 670.1  | 984.9  | SLC11A2  | <a href="#">NM_000617.1</a> | DCT1;DMT1;NRAMP2                   | iron ion     | integral to | iron ion    |
| GI_10835170-S | 131.7  | 164.4  | 129.1  | IFNG     | <a href="#">NM_000619.1</a> | IFG;IFI                            | interferon-  | extracellul | cell        |
| GI_10835172-S | 120.4  | 150.4  | 124.3  | NOS1     | <a href="#">NM_000620.1</a> | NOS                                | nitric-      | membran     | synaptic    |
| GI_10835174-S | 199.8  | 216.5  | 195.9  | HTR2A    | <a href="#">NM_000621.1</a> | HTR2                               | serotonin    | integral to | serotonin   |
| GI_10835182-S | 149.8  | 166.6  | 173.2  | IFNAR1   | <a href="#">NM_000629.1</a> | AVP;IFRC;IFNAR;IFNBR               | interferon-  | integral to | JAK-STAT    |
| GI_10835186-S | 475.2  | 653.3  | 628.5  | SOD2     | <a href="#">NM_000636.1</a> | IPO-B;MNSOD                        | manganes     | mitochond   | response    |
| GI_10835188-S | 665.1  | 737.9  | 740.3  | GSR      | <a href="#">NM_000637.1</a> |                                    | glutathion   | mitochond   | response    |
| GI_10835196-S | 114    | 114    | 102.1  | HTR1F    | <a href="#">NM_000866.1</a> | MR77;HTR1EL                        | serotonin    | integral to | G-protein   |
| GI_10835229-S | 330.1  | 410    | 366.4  | MT1G     | <a href="#">NM_005950.1</a> | MT1;MGC12386                       | heavy        |             |             |
| GI_10835235-S | 227.3  | 289.1  | 257.3  | SPRR1A   | <a href="#">NM_005987.1</a> | SPRK                               | structural   |             | epidermal   |
| GI_10835237-S | 742.5  | 838.6  | 397    | IFITM2   | <a href="#">NM_006435.1</a> | 1-8D                               |              | integral to | immune      |
| GI_10835241-S | 105.1  | 109.6  | 102.2  | PRKG1    | <a href="#">NM_006258.1</a> | PGK;CGKI;PRKG1B;PRKGR1B;cGKI-      |              |             | actin       |
| GI_10835249-S | 119.6  | 132.2  | 113.4  | REGL     | <a href="#">NM_006508.1</a> | RS                                 |              |             | cell        |
| GI_10835253-S | 120.4  | 150.3  | 141.5  | SPRR2C   | <a href="#">NM_006518.1</a> |                                    |              |             |             |
| GI_10862687-S | 122.9  | 134.4  | 123.6  | LATS1    | <a href="#">NM_004690.2</a> | wts;WARTS                          | protein      |             | regulation  |
| GI_10862688-S | 143.4  | 108    | 97     | ZFPM2    | <a href="#">NM_012082.2</a> | FOG2;hFOG-2                        | transcripti  |             | regulation  |
| GI_10862689-S | 180.8  | 235.2  | 167    | LMAN1    | <a href="#">NM_005570.2</a> | MR60;gp58;F5F8D;FMFD1;MCFD1;ERGIC5 | mannose      | Golgi       | ER to       |

|               |         |        |        |          |                             |                                    |             |             |             |
|---------------|---------|--------|--------|----------|-----------------------------|------------------------------------|-------------|-------------|-------------|
| GI_10862690-S | 2190.4  | 2176.7 | 1119.5 | ACVR1    | <a href="#">NM_001105.2</a> | ALK2;SKR1;ACTRI;ACVRLK2            | transmem    | integral to | transmem    |
| GI_10862696-S | 360.8   | 374.1  | 338.5  | ACVR2    | <a href="#">NM_001616.2</a> | ACTRII                             | transmem    | integral to | transmem    |
| GI_10862697-S | 265.2   | 245.3  | 264.4  | ACVR2B   | <a href="#">NM_001106.2</a> | ACTR-IIB                           | transmem    | integral to | transmem    |
| GI_10863870-S | 305.9   | 385.7  | 325.9  | RYR1     | <a href="#">NM_000540.1</a> | CCO;MHS;RYR;MHS1;RYDR              | calcium-    | smooth      | calcium     |
| GI_10863872-S | 124.7   | 126.7  | 114.1  | TGFB1    | <a href="#">NM_000660.1</a> | CED;DPD1;TGFB                      | transformi  |             | anti-       |
| GI_10863874-S | 65577.5 | 64467  | 60037  | RPL41    | <a href="#">NM_021104.1</a> |                                    | structural  | cytosolic   | protein     |
| GI_10863876-S | 630     | 411.7  | 392.1  | PLSCR1   | <a href="#">NM_021105.1</a> | MMTRA1B                            | calcium     | integral to | phospholi   |
| GI_10863878-S | 724.7   | 658.9  | 794.9  | SLC5A6   | <a href="#">NM_021095.1</a> | SMVT                               | sodium      | membran     | small       |
| GI_10863884-S | 108.2   | 125.6  | 125.8  | RUNX2    | <a href="#">NM_004348.1</a> | CCD;AML3;CCD1;OSF2;CBFA1;PEBP2A1;P | RNA         | nucleus     | ossificatio |
| GI_10863902-S | 1554.6  | 1992.9 | 1252.3 | TRIP12   | <a href="#">NM_004238.1</a> |                                    |             |             |             |
| GI_10863904-S | 364.1   | 484    | 344.9  | TRIP11   | <a href="#">NM_004239.1</a> | CEV14;TRIP230;GMAP-210             | protein     |             | transcripti |
| GI_10863908-S | 104.6   | 119.4  | 96.7   | SPINT2   | <a href="#">NM_021102.1</a> | Kop;HAI2;HAI-2                     | serine      | soluble     | cell        |
| GI_10863910-S | 85.6    | 105.2  | 95.8   | SPINK2   | <a href="#">NM_021114.1</a> | HUSI-II                            | endopepti   |             |             |
| GI_10863912-S | 199.5   | 252.1  | 232.4  | SLC8A1   | <a href="#">NM_021097.1</a> | NCX1                               | sodium      | integral to | sodium      |
| GI_10863920-S | 98      | 96.4   | 96.7   | DLG3     | <a href="#">NM_021120.1</a> | NEDLG;SAP102;KIAA1232              | guanylate   | cellular_co | negative    |
| GI_10863922-S | 1636.3  | 1385.6 | 701.9  | PMAIP1   | <a href="#">NM_021127.1</a> | APR;NOXA                           |             |             | oncogene    |
| GI_10863934-S | 530.8   | 338    | 705.8  | RTN1     | <a href="#">NM_021136.1</a> | NSP                                | molecular   | endoplas    | signal      |
| GI_10863940-S | 93.4    | 99.5   | 98.1   | UGT2B4   | <a href="#">NM_021139.1</a> | UGT2B11                            | glucurono   | microsom    | xenobiotic  |
| GI_10863942-S | 226.5   | 224.1  | 208.4  | UTX      | <a href="#">NM_021140.1</a> |                                    |             | nucleus     |             |
| GI_10863946-S | 733.9   | 722.8  | 628.5  | DMTF1    | <a href="#">NM_021145.1</a> | DMP1;DMTF1;hDMP1                   | transcripti | nucleus     | regulation  |
| GI_10863950-S | 300.1   | 283.2  | 364.4  | UNG2     | <a href="#">NM_021147.1</a> |                                    | uracil DNA  | nucleus     | base-       |
| GI_10863968-S | 149.8   | 154    | 145.9  | POLD4    | <a href="#">NM_021173.1</a> | p12;POLDS                          | delta DNA   | nucleus     | DNA         |
| GI_10863972-S | 139.5   | 132.4  | 126.3  | HAMP     | <a href="#">NM_021175.1</a> | HEPC;HFE2B;LEAP1;LEAP-1            | antifungal  | extracellul | xenobiotic  |
| GI_10863974-S | 137.4   | 177.7  | 157.6  | IGRP     | <a href="#">NM_021176.1</a> |                                    |             |             |             |
| GI_10863982-S | 82.9    | 87.3   | 94.9   | HB-1     | <a href="#">NM_021182.1</a> |                                    |             |             |             |
| GI_10863984-S | 732.5   | 836.1  | 806.7  | C6orf47  | <a href="#">NM_021184.1</a> | G4;NG34;D6S53E                     | molecular   | cellular_co | biological_ |
| GI_10863992-S | 102.7   | 123.5  | 108.5  | CYP4F11  | <a href="#">NM_021187.1</a> |                                    | cytochrom   | membran     | electron    |
| GI_10863994-S | 797.1   | 778.1  | 757.3  | ZNF410   | <a href="#">NM_021188.1</a> | APA1;APA-1                         | DNA         | nucleus     | regulation  |
| GI_10863996-S | 255.8   | 393.5  | 292.6  | PTBP2    | <a href="#">NM_021190.1</a> | PTB;MIBP;nPTB;PTBLP;brPTB          | nucleic     |             |             |
| GI_10863998-S | 126.8   | 138.4  | 122.6  | NEUROD4  | <a href="#">NM_021191.1</a> | ATH-3;Atoh3;MATH-3                 | DNA         | nucleus     | regulation  |
| GI_10864008-I | 1736.4  | 1619   | 1927.4 | CTDSP1   | <a href="#">NM_021198.1</a> | SCP1;NLIIF                         |             |             |             |
| GI_10864010-S | 1373.1  | 2143.3 | 2349.2 | SQRDL    | <a href="#">NM_021199.1</a> | CGI-44                             | disulfide   | mitochond   | electron    |
| GI_10864012-S | 174.4   | 292.9  | 218.5  | PLEKHB1  | <a href="#">NM_021200.1</a> | KPL1;PHR1;PHRET1                   | signal      | membran     | phototrans  |
| GI_10864016-S | 1844.9  | 1501.4 | 1267.4 | MASA     | <a href="#">NM_021204.1</a> | FLJ12594;DKFZp586M0524             | hydrolase   |             | metabolis   |
| GI_10864018-S | 107.7   | 94.4   | 96.9   | C9orf27  | <a href="#">NM_021208.1</a> | EST-YD1                            | molecular   | cellular_co | biological_ |
| GI_10864022-S | 991.3   | 1215.6 | 1022.3 | LOC58486 | <a href="#">NM_021211.1</a> |                                    | DNA         |             |             |
| GI_10864024-S | 415.5   | 745.9  | 581.4  | ZF       | <a href="#">NM_021212.1</a> |                                    | antiviral   | nucleus     | transcripti |
| GI_10864026-S | 275.9   | 334.3  | 364.8  | PCTP     | <a href="#">NM_021213.1</a> | STARD2                             |             |             |             |
| GI_10864030-S | 1263.3  | 1738.3 | 1501.4 | ZNF339   | <a href="#">NM_021220.1</a> | OVOL2;EUROIMAGE566589              | DNA         | nucleus     | regulation  |
| GI_10864032-S | 137.9   | 163.1  | 137.6  | LY6G5B   | <a href="#">NM_021221.1</a> | G5b;C6orf19                        |             |             |             |
| GI_10864034-S | 172.1   | 198.3  | 173    | PROL1    | <a href="#">NM_021225.1</a> | BPLP;PRL1                          | molecular   | cellular_co | biological_ |
| GI_10864036-S | 109.7   | 123.1  | 111.2  | MYL7     | <a href="#">NM_021223.1</a> | MYL2A;MYLC2A                       | myosin      | myosin      | smooth      |
| GI_10864040-A | 128.6   | 147.5  | 130.8  | MLL3     | <a href="#">NM_021230.1</a> | HALR;FLJ12625;KIAA1506             | methyltran  | nucleus     | regulation  |
| GI_10864040-I | 122.1   | 145.3  | 144.5  | MLL3     | <a href="#">NM_021230.1</a> | HALR;FLJ12625;KIAA1506             | methyltran  | nucleus     | regulation  |

|               |        |        |        |           |                             |                                    |             |             |              |
|---------------|--------|--------|--------|-----------|-----------------------------|------------------------------------|-------------|-------------|--------------|
| GI_10864042-S | 98.5   | 109.5  | 90.6   | PRODH2    | <a href="#">NM_021232.1</a> | HSPOX1                             |             |             |              |
| GI_10864046-S | 414.3  | 536.7  | 442.9  | EPS15L1   | <a href="#">NM_021235.1</a> | EPS15R                             | calcium     |             |              |
| GI_10864048-S | 4919.7 | 4205.7 | 3458.5 | C12orf14  | <a href="#">NM_021238.1</a> | TERA                               |             |             |              |
| GI_10864054-S | 117    | 138.3  | 109.7  | LY6G6D    | <a href="#">NM_021246.1</a> | G6D;NG25;LY6-D;MEGT1;C6orf23       |             |             |              |
| GI_10864056-S | 108.5  | 111.4  | 98.8   | PRM3      | <a href="#">NM_021247.1</a> |                                    | molecular   | cellular_co | biological_  |
| GI_10864062-S | 319.5  | 466.3  | 443.6  | PELI2     | <a href="#">NM_021255.1</a> |                                    |             |             |              |
| GI_10864068-S | 419.3  | 481    | 478.5  | TMEM8     | <a href="#">NM_021259.1</a> | M83                                | molecular   | integral to | biological_  |
| GI_10864076-S | 338.4  | 395.1  | 359.4  | CACNA1H   | <a href="#">NM_021098.1</a> | CACNA1HB                           | low         | voltage-    | myoblast     |
| GI_10864080-S | 100    | 124.5  | 108    | PLXNB3    | <a href="#">NM_005393.1</a> | PLEXR;PLXN6;PLEXB3                 | receptor    | membran     | developm     |
| GI_10864649-S | 113.2  | 141    | 125.6  | PRKCZ     | <a href="#">NM_002744.2</a> | PKC2                               | atypical    | cytoplasm   | anti-        |
| GI_10880123-A | 332    | 474.6  | 476    | PSCD2     | <a href="#">NM_004228.3</a> | ARNO;CTS18.1;Sec7p-L               | ARF         | kinesin     | actin        |
| GI_10880124-S | 86.1   | 77.5   | 78.3   | SAG       | <a href="#">NM_000541.2</a> | ARRESTIN                           | protein     | soluble     | rhodopsin    |
| GI_10880125-S | 104.4  | 104.8  | 109.9  | XPNPEP2   | <a href="#">NM_003399.3</a> |                                    | aminopept   | membran     | proteolysis  |
| GI_10880133-A | 174    | 172.5  | 155    | ARRB1     | <a href="#">NM_020251.1</a> | ARB1;ARR1                          | enzyme      | heterotrim  | signal       |
| GI_10880974-S | 108.9  | 108.2  | 102.1  | LOC57821  | <a href="#">NM_021179.1</a> |                                    |             |             |              |
| GI_10880978-S | 149.7  | 182.9  | 157.7  | LSP1      | <a href="#">NM_002339.1</a> | WP34;pp52                          | actin       | actin       | cellular     |
| GI_10880984-S | 86.2   | 79.9   | 86.4   | IFNA17    | <a href="#">NM_021268.1</a> |                                    | interferon- | extracellul | response     |
| GI_10938004-S | 93.8   | 113.9  | 109    | CDKL2     | <a href="#">NM_003948.2</a> | P56;KKIAMRE                        | protein     |             | sex          |
| GI_10938005-S | 405.3  | 395.1  | 426.2  | SLC10A3   | <a href="#">NM_019848.2</a> | P3;DXS253E                         | bile        | integral to | organic      |
| GI_10938006-I | 91.7   | 100.3  | 93.8   | TSC2      | <a href="#">NM_000548.2</a> | LAM;TUBERIN                        | Rab         | cytosol     | pathogene    |
| GI_10938009-A | 736.4  | 750.8  | 640.6  | TSC2      | <a href="#">NM_021056.1</a> | LAM;TUBERIN                        | Rab         | cytosol     | pathogene    |
| GI_10938011-S | 107    | 124    | 113.7  | ACTC      | <a href="#">NM_005159.2</a> |                                    | structural  | actin       | regulation   |
| GI_10938012-S | 234.9  | 264.1  | 239.9  | E4F1      | <a href="#">NM_004424.2</a> | E4F                                | transcripti |             | cell         |
| GI_10938013-S | 3917.3 | 7535   | 8219.3 | JUND      | <a href="#">NM_005354.2</a> |                                    | RNA         | chromatin   | regulation   |
| GI_10938017-S | 1443.4 | 1694.8 | 1722.3 | CCNB2     | <a href="#">NM_004701.2</a> | HsT17299                           | cyclin-     | nucleus     | cytokinesi   |
| GI_10938018-S | 122.4  | 128.8  | 117.2  | DSPG3     | <a href="#">NM_004950.2</a> | SLRR3B                             | glycosami   | extracellul | pregnancy    |
| GI_10938019-S | 92.7   | 115.4  | 96.2   | FABP2     | <a href="#">NM_000134.2</a> | FABPI                              | lipid       |             | fatty acid   |
| GI_10938020-S | 155.6  | 176.8  | 152.1  | FABP3     | <a href="#">NM_004102.2</a> | MDGI;FABP11;O-FABP                 | lipid       | soluble     | negative     |
| GI_10938021-S | 9396.9 | 10820  | 10098  | CAP1      | <a href="#">NM_006367.2</a> | CAP;CAP1-PEN                       |             | membran     | establish    |
| GI_10938022-S | 82     | 90.3   | 84.2   | PAMCI     | <a href="#">NM_005447.2</a> | P-CIP1                             |             | endosome    | nonselecti   |
| GI_10947028-S | 179.9  | 205.8  | 198.1  | SCGB1D2   | <a href="#">NM_006551.2</a> | LIPB;LPHB                          |             | extracellul |              |
| GI_10947029-S | 95.2   | 81.2   | 84.9   | SERPINI2  | <a href="#">NM_006217.2</a> | MEPI;PI14;PANCPIN;TSA2004;SERPIN12 | serpin      |             | cell         |
| GI_10947030-S | 5595   | 6750.3 | 6151.7 | PM5       | <a href="#">NM_014287.2</a> |                                    | molecular   | cellular_co | biological_  |
| GI_10947032-S | 3705.4 | 3846.8 | 4277.9 | M6PR      | <a href="#">NM_002355.2</a> | SMPR;MPR46;CD-MPR                  | transmem    | lysosome    | endosome     |
| GI_10947033-S | 1398.6 | 2162.3 | 3237.5 | MXD4      | <a href="#">NM_006454.2</a> | MAD4                               | transcripti |             | negative     |
| GI_10947034-S | 306.5  | 305.1  | 287.8  | EIF4ENIF1 | <a href="#">NM_019843.2</a> | 4E-T;Clast4;FLJ21601               | protein     | cytoplasm   | nucleocyto   |
| GI_10947049-A | 91.1   | 80.4   | 90.6   | ANK1      | <a href="#">NM_020481.1</a> | ANK;SPH1;SPH2                      | structural  | actin       |              |
| GI_10947051-I | 102.3  | 109.3  | 105.4  | ANK2      | <a href="#">NM_001148.2</a> | LQT4                               | structural  | membran     | signal       |
| GI_10947053-A | 142.4  | 149.4  | 134.6  | ANK2      | <a href="#">NM_020977.1</a> | LQT4                               | structural  | membran     | signal       |
| GI_10947058-S | 2532.7 | 1787.4 | 2020.4 | ADCY3     | <a href="#">NM_004036.2</a> | AC3;KIAA0511                       | adenylate   | integral to | signal       |
| GI_10947059-I | 142.7  | 186.7  | 152.2  | ADCY6     | <a href="#">NM_015270.2</a> | KIAA0422                           | calcium/ca  | integral to | cAMP         |
| GI_10947062-S | 113.4  | 129.9  | 105.3  | ADCYAP1   | <a href="#">NM_001117.2</a> | PACAP                              | neuropepti  | soluble     | adenylate    |
| GI_10947110-S | 217.1  | 167    | 117.2  | ARG2      | <a href="#">NM_001172.2</a> |                                    | arginase    | mitochond   | nitric oxide |
| GI_10947121-I | 94.5   | 92.4   | 80.3   | ABCC9     | <a href="#">NM_020297.1</a> | SUR2;ABC37                         | sulfonylur  | integral to | potassium    |

|               |         |        |        |          |                             |                                      |             |             |             |
|---------------|---------|--------|--------|----------|-----------------------------|--------------------------------------|-------------|-------------|-------------|
| GI_10947123-A | 115.3   | 103.4  | 104.2  | ABCC9    | <a href="#">NM_020298.1</a> | SUR2;ABC37                           | sulfonylur  | integral to | potassium   |
| GI_10947125-S | 293     | 437.7  | 399.3  | ABCD3    | <a href="#">NM_002858.2</a> | ABC43;PMP70;PXMP1                    | ATP-        | integral to | peroxisom   |
| GI_10947128-A | 165.8   | 208.5  | 183.9  | ABCD4    | <a href="#">NM_020324.1</a> | P70R;P79R;ABC41;PMP69;PXMP1L;EST352  | ATP         | peroxisom   | small       |
| GI_10947130-I | 110.8   | 126.6  | 113.8  | ABCD4    | <a href="#">NM_020325.1</a> | P70R;P79R;ABC41;PMP69;PXMP1L;EST352  | ATP         | peroxisom   | small       |
| GI_10947134-S | 3244.6  | 3000.7 | 2931.3 | ABCF1    | <a href="#">NM_001090.1</a> | ABC27;ABC50;EST123147                | translation |             | protein     |
| GI_10947138-S | 121.2   | 122.8  | 133    | ARG1     | <a href="#">NM_000045.2</a> |                                      | arginase    | cytoplasm   | urea cycle  |
| GI_11024640-S | 521.6   | 391.6  | 395.4  | GAGE7    | <a href="#">NM_021123.1</a> | GAGE-7                               |             |             |             |
| GI_11024646-S | 90.4    | 93     | 89.6   | ADH6     | <a href="#">NM_000672.2</a> | ADH-5                                | alcohol     |             | ethanol     |
| GI_11024685-S | 662.9   | 701.4  | 538.8  | FLJ10637 | <a href="#">NM_018164.1</a> | FLJ10630                             |             |             |             |
| GI_11024693-S | 322.2   | 302    | 229.5  | DDX26    | <a href="#">NM_012141.1</a> | HDB;DBI-1;DICE1;Notch12;DKFZP434B105 | tumor       |             | cell growth |
| GI_11024697-S | 3150.1  | 2588.8 | 2236.9 | MGEA5    | <a href="#">NM_012215.1</a> | MEA5;KIAA0679;O-GLCNACASE            | hyalurono   |             | glycoprote  |
| GI_11024703-S | 597.4   | 465.9  | 454.7  | FLJ10287 | <a href="#">NM_019083.1</a> | FLJ11219                             |             |             |             |
| GI_11024711-S | 106.4   | 103.2  | 90.8   | MYH4     | <a href="#">NM_017533.1</a> | MYH2B;MyHC-2B;MyHC-IIb               | muscle      | muscle      | striated    |
| GI_11034818-S | 236.7   | 204.6  | 359.2  | NRIP3    | <a href="#">NM_020645.1</a> | C11orf14                             | sugar       |             |             |
| GI_11034834-I | 192.4   | 247.2  | 196.1  | ZNF302   | <a href="#">NM_018675.1</a> | ZNF327;ZNF135L;ZNF140L               | DNA         | nucleus     | regulation  |
| GI_11034854-S | 1533.1  | 1757.9 | 1804.8 | C11orf15 | <a href="#">NM_020644.1</a> |                                      |             | integral to |             |
| GI_11036631-S | 121     | 123.8  | 125    | DSPP     | <a href="#">NM_014208.1</a> | DPP;DSP;DGI1;DTDP2;DFNA39            | collagen    | extracellul | ossificatio |
| GI_11036639-S | 1293.7  | 1435.6 | 791.5  | PPP3CB   | <a href="#">NM_021132.1</a> | CALNB;CALNA2                         | calmoduli   | calcineurin | transcripti |
| GI_11036645-S | 971.2   | 1479.2 | 1401.2 | H2BFS    | <a href="#">NM_017445.1</a> |                                      |             |             |             |
| GI_11036647-S | 111.5   | 106    | 107.7  | PPY2     | <a href="#">NM_021092.1</a> |                                      |             |             |             |
| GI_11036649-S | 148.8   | 199.1  | 163.4  | PYY2     | <a href="#">NM_021093.1</a> |                                      |             |             |             |
| GI_11036657-S | 90.2    | 84.8   | 70.1   | DAZ3     | <a href="#">NM_020364.1</a> | pDP1679                              | nucleic     |             |             |
| GI_11036659-S | 86.1    | 91.6   | 81.6   | DAZ2     | <a href="#">NM_020363.1</a> | pDP1678                              | nucleic     |             |             |
| GI_11037054-S | 171.3   | 162.7  | 166.8  | SPAG4    | <a href="#">NM_003116.1</a> |                                      | structural  | kinesin     | spermatog   |
| GI_11037056-S | 1941.5  | 2119.1 | 1258.5 | MYO10    | <a href="#">NM_012334.1</a> | KIAA0799                             | actin       | cytoskelet  | neuropepti  |
| GI_11037060-A | 1067.7  | 1107.7 | 1021.6 | C21orf59 | <a href="#">NM_021254.1</a> | C21orf48;FLJ20467                    |             |             |             |
| GI_11037060-I | 132.3   | 141.7  | 123.6  | C21orf59 | <a href="#">NM_021254.1</a> | C21orf48;FLJ20467                    |             |             |             |
| GI_11037062-S | 251.2   | 283.3  | 177.2  | PEL1     | <a href="#">NM_020651.2</a> |                                      |             |             |             |
| GI_11037064-S | 473.6   | 406.3  | 277    | DISC1    | <a href="#">NM_018662.1</a> | KIAA0457                             | protein     | kinesin     | biological_ |
| GI_11038618-S | 17086.3 | 19495  | 15662  | ACTG1    | <a href="#">NM_001614.2</a> | ACTG;DFNA20;DFNA26                   | structural  | actin       |             |
| GI_11038619-A | 155.3   | 181.7  | 159    | CHAT     | <a href="#">NM_020986.1</a> | FIMG2                                | acyltransf  | cytoplasm   | synaptic    |
| GI_11038623-S | 1119.1  | 961.8  | 834.8  | PHC1     | <a href="#">NM_004426.1</a> | EDR1;HPH1;RAE28                      | protein     | nucleus     | developm    |
| GI_11038625-S | 120.7   | 125.6  | 108    | ACTG2    | <a href="#">NM_001615.2</a> | ACTE;ACTA3;ACTSG                     | structural  | actin       | muscle      |
| GI_11038626-I | 249.9   | 296    | 256.5  | CHAT     | <a href="#">NM_020549.2</a> | FIMG2                                | acyltransf  | cytoplasm   | synaptic    |
| GI_11038629-I | 155.5   | 187.3  | 176.8  | CHAT     | <a href="#">NM_020984.1</a> | FIMG2                                | acyltransf  | cytoplasm   | synaptic    |
| GI_11038636-I | 137.8   | 152.7  | 142.7  | GRIN1    | <a href="#">NM_007327.1</a> | NR1;NMDA1;NMDAR1                     | N-methyl-   | integral to | small       |
| GI_11038638-I | 111.4   | 124.1  | 128.8  | BCR      | <a href="#">NM_004327.2</a> | ALL;CML;PHL;BCR1;D22S11;D22S662      | protein     |             | protein     |
| GI_11038640-A | 146     | 180.6  | 167.9  | BCR      | <a href="#">NM_021574.1</a> | ALL;CML;PHL;BCR1;D22S11;D22S662      | protein     |             | protein     |
| GI_11038640-I | 566.1   | 649.5  | 636.3  | BCR      | <a href="#">NM_021574.1</a> | ALL;CML;PHL;BCR1;D22S11;D22S662      | protein     |             | protein     |
| GI_11038642-A | 14961.4 | 18266  | 15834  | AP2S1    | <a href="#">NM_021575.1</a> | AP17;CLAPS2;AP17-DELTA               | vesicle     | coated      |             |
| GI_11038644-I | 7800.3  | 9636.4 | 8130.8 | AP2S1    | <a href="#">NM_004069.2</a> | AP17;CLAPS2;AP17-DELTA               | vesicle     | coated      |             |
| GI_11038645-S | 1295.1  | 1527.5 | 1280.5 | BANF1    | <a href="#">NM_003860.2</a> | BAF;BCRP1;D14S1460                   | DNA         | nucleus     | response    |
| GI_11038647-S | 284.8   | 244.4  | 269.2  | CDC7     | <a href="#">NM_003503.2</a> | Hsk1;CDC7L1;HsCDC7;huCDC7            | protein     | cytoplasm   | G1/S        |
| GI_11038650-S | 1066.5  | 1178.6 | 1104.2 | IK       | <a href="#">NM_006083.2</a> | RED;CSA2                             | cytokine    | soluble     | immune      |

|               |        |        |        |            |                             |                                    |              |             |             |
|---------------|--------|--------|--------|------------|-----------------------------|------------------------------------|--------------|-------------|-------------|
| GI_11038651-S | 1292.5 | 1444.3 | 1461.5 | PTTG1      | <a href="#">NM_004219.2</a> | EAP1;PTTG;HPTTG;TUTR1;SECURIN      | transcripti  | cytoplasm   | spermatog   |
| GI_11038652-S | 139.2  | 185.5  | 159.2  | AQP9       | <a href="#">NM_020980.2</a> | SSC1;HsT17287                      | water        | integral to | water       |
| GI_11038653-S | 89.9   | 98.5   | 81     | ADAMTS1    | <a href="#">NM_006988.2</a> | C3-C5;METH1;KIAA1346               | integrin     | extracellul | integrin-   |
| GI_11038658-A | 114.9  | 160.2  | 411    | ADAMTS2    | <a href="#">NM_021599.1</a> | NPI;PCINP;PCPNI;hPCPNI;ADAM-       | collagenas   | extracellul | collagen    |
| GI_11038661-S | 119.4  | 132.1  | 120.7  | C1QB       | <a href="#">NM_000491.2</a> |                                    | compleme     | compleme    | compleme    |
| GI_11038670-S | 9906.4 | 9079   | 8421.4 | PTTG1IP    | <a href="#">NM_004339.2</a> | PBF;C21ORF1;C21ORF3                | molecular    | integral to | protein-    |
| GI_11038671-A | 250.9  | 317.4  | 298.8  | CD79A      | <a href="#">NM_021601.1</a> | IGA;MB-1                           | transmem     | integral to | defense     |
| GI_11038673-I | 174.9  | 225.3  | 171.4  | CD79B      | <a href="#">NM_000626.1</a> | B29;IGB                            | transmem     | integral to | signal      |
| GI_11038675-A | 142.6  | 169.5  | 140.4  | CD79B      | <a href="#">NM_021602.1</a> | B29;IGB                            | transmem     | integral to | signal      |
| GI_11055991-S | 621.9  | 880.4  | 717.4  | RISC       | <a href="#">NM_021626.1</a> | HSCP1                              | serine       |             | proteolysis |
| GI_11055993-S | 342.6  | 376.4  | 455.9  | SENP2      | <a href="#">NM_021627.1</a> | AXAM2;SMT3IP2;KIAA1331             | cysteine-    | nuclear     | regulation  |
| GI_11055995-S | 101.1  | 113.5  | 112.9  | ALOXE3     | <a href="#">NM_021628.1</a> |                                    | lipoxygena   |             | electron    |
| GI_11056001-S | 98.3   | 101.9  | 88.1   | FKSG2      | <a href="#">NM_021631.1</a> |                                    | molecular    | cytoplasm   | apoptosis   |
| GI_11056007-S | 100.9  | 104.2  | 106.2  | LGR7       | <a href="#">NM_021634.1</a> |                                    | rhodopsin-   | integral to | G-protein   |
| GI_11056009-S | 284.9  | 356.2  | 284.4  | PBOV1      | <a href="#">NM_021635.1</a> | UC28;UROC28;dJ171N11.2             |              |             |             |
| GI_11056011-S | 128.7  | 130.1  | 130.5  | FLJ14084   | <a href="#">NM_021637.1</a> |                                    |              |             |             |
| GI_11056017-S | 911.2  | 817.4  | 773.5  | C12orf10   | <a href="#">NM_021640.1</a> | MYG;MYG1                           |              |             |             |
| GI_11056035-S | 1227.1 | 1282.2 | 1161.8 | KIAA0153   | <a href="#">NM_015140.1</a> |                                    | tubulin-     |             | protein     |
| GI_11056051-S | 285.9  | 339.5  | 292.4  | FCGR2A     | <a href="#">NM_021642.1</a> | CD32;FCG2;FcGR;CDw32;FCGR2;IGFR2;F | receptor     | integral to | immune      |
| GI_11056053-S | 491.9  | 1392.8 | 726.3  | TRB2       | <a href="#">NM_021643.1</a> | TRIB2;GS3955                       | protein      |             | protein     |
| GI_11056055-I | 217.1  | 245.6  | 232.6  | MRPS12     | <a href="#">NM_021107.1</a> | RPS12;RPMS12;RPSM12;MPR-S12;MT-    | structural   | mitochond   | protein     |
| GI_11063982-S | 637.9  | 705.4  | 638.5  | KIAA0266   | <a href="#">NM_021645.1</a> |                                    |              |             |             |
| GI_11067750-S | 105.9  | 123.6  | 110.5  | IFNA2      | <a href="#">NM_000605.2</a> | INFA2                              | interferon-  | extracellul | induction   |
| GI_11068002-S | 166.7  | 234.4  | 276.4  | IGF1R      | <a href="#">NM_000875.2</a> | JTK13                              | insulin-like | integral to | insulin     |
| GI_11068140-S | 186    | 228.5  | 221.2  | C11orf16   | <a href="#">NM_020643.1</a> |                                    |              |             |             |
| GI_11072092-I | 2664.1 | 2412.6 | 2625.8 | WDR6       | <a href="#">NM_018031.2</a> | FLJ10218                           | molecular    | cellular_co | biological_ |
| GI_11072100-S | 230.4  | 245.3  | 219.4  | C22orf3    | <a href="#">NM_012265.1</a> | HS984G1A                           |              |             |             |
| GI_11079227-S | 1991.5 | 2258.9 | 2208.4 | NSF        | <a href="#">NM_006178.1</a> | SKD2                               | ATP-         | Golgi       | proteolysis |
| GI_11079650-S | 148.9  | 173.1  | 157.1  | PNOG       | <a href="#">NM_006228.2</a> | PPNOG                              | neuropepti   | extracellul | sensory     |
| GI_11095446-S | 91.7   | 103.8  | 101.6  | HLA-DQA2   | <a href="#">NM_020056.1</a> | HLA-DXA                            |              |             |             |
| GI_11096339-S | 2108.5 | 3151.7 | 3824.1 | C3orf4     | <a href="#">NM_019895.1</a> | HSPC174;GENX-3745;DKFZP564P0462    |              | integral to |             |
| GI_11119413-S | 1569.7 | 1233.1 | 1243.9 | TACC2      | <a href="#">NM_006997.1</a> | AZU-1                              |              | kinesin     | oncogene    |
| GI_11119427-S | 3966.3 | 3024.8 | 3698.1 | VIP32      | <a href="#">NM_021732.1</a> | VIT32;PP5395                       |              |             |             |
| GI_11119429-S | 112.1  | 112.6  | 98.8   | TSKS       | <a href="#">NM_021733.1</a> | TSKS1                              | kinase       |             |             |
| GI_11120735-S | 131.9  | 151.2  | 158.2  | DUX1       | <a href="#">NM_012146.1</a> |                                    | transcripti  | nucleus     | transcripti |
| GI_11120737-S | 185.4  | 228.3  | 192.2  | DUX5       | <a href="#">NM_012149.1</a> |                                    | transcripti  | nucleus     | regulation  |
| GI_11125767-S | 950.5  | 1041.4 | 949    | HRI        | <a href="#">NM_014413.2</a> |                                    | ATP          |             | protein     |
| GI_11125769-S | 2374.3 | 2665.3 | 2223.1 | JTV1       | <a href="#">NM_006303.2</a> | P38;PRO0992                        | DNA          |             | protein     |
| GI_11125771-S | 103.1  | 104.8  | 93.6   | MARCKS     | <a href="#">NM_002356.4</a> | MACS;80K-L;PKCSL;MRACKS;PRKCSL     | calmoduli    | actin       | cell        |
| GI_11125773-S | 266.7  | 248.9  | 263    | PMS2       | <a href="#">NM_000535.2</a> | PMSL2;HNPCC4;PMS2CL                | DNA          | nucleus     | mismatch    |
| GI_11125774-S | 90.8   | 98.4   | 94     | REN        | <a href="#">NM_000537.2</a> |                                    | renin        |             | regulation  |
| GI_11128014-S | 91.3   | 101.9  | 81.9   | IFNA6      | <a href="#">NM_021002.1</a> |                                    | hematopoi    | extracellul | response    |
| GI_11128020-S | 107.4  | 87.6   | 104.8  | DKFZP434A0 | <a href="#">NM_018991.1</a> |                                    |              |             |             |
| GI_11136625-S | 106.4  | 125    | 107.3  | NOX3       | <a href="#">NM_015718.1</a> | GP91-3                             | oxidoredu    | membran     | electron    |

|               |        |        |        |          |                             |                                 |              |                         |
|---------------|--------|--------|--------|----------|-----------------------------|---------------------------------|--------------|-------------------------|
| GI_11138122-S | 114.4  | 131.7  | 125.8  | CHRNA10  | <a href="#">NM_020402.2</a> | extracellul                     | integral to  | synaptic                |
| GI_11140810-S | 2235.2 | 1813   | 1581.3 | CUL4A    | <a href="#">NM_003589.1</a> | tumor                           |              | induction               |
| GI_11140814-S | 310.9  | 376.9  | 335    | FTCD     | <a href="#">NM_006657.1</a> | folic acid                      | cytoplasm    | folic acid              |
| GI_11141874-S | 119.6  | 128.4  | 125.5  | IL21     | <a href="#">NM_021803.1</a> |                                 |              |                         |
| GI_11141876-S | 204.1  | 200.4  | 417.5  | SIGIRR   | <a href="#">NM_021805.1</a> | interleukin-                    | membran      |                         |
| GI_11141882-S | 259.4  | 307.3  | 273.2  | BPESC1   | <a href="#">NM_021812.1</a> | molecular                       | cellular_co  | biological_             |
| GI_11141886-S | 137.9  | 125.3  | 109.3  | HAPLN2   | <a href="#">NM_021817.1</a> | BRAL1                           | hyaluronic   | extracellul cell        |
| GI_11141890-S | 113.9  | 116.7  | 112.6  | LMAN1L   | <a href="#">NM_021819.1</a> | ERGL;CPXIII;FLJ13993;ERGIC-53L  |              |                         |
| GI_11141892-S | 402.8  | 452.6  | 381.5  | C6orf75  | <a href="#">NM_021820.1</a> | MDS024;dJ187J11.2               |              |                         |
| GI_11141898-S | 2361.9 | 2041.9 | 2350.3 | NIF3L1   | <a href="#">NM_021824.1</a> | CALS-7;MDS015;ALS2CR1           |              |                         |
| GI_11141904-S | 102.4  | 115.4  | 95.9   | FLJ23514 | <a href="#">NM_021827.1</a> |                                 |              |                         |
| GI_11181769-I | 102.2  | 110.5  | 106.9  | XT3      | <a href="#">NM_020208.1</a> |                                 | transporte   | plasma small            |
| GI_11184225-S | 996    | 808.5  | 438.8  | RGS10    | <a href="#">NM_002925.2</a> |                                 | signal       | signal                  |
| GI_11184232-S | 157.2  | 166.1  | 145.6  | HAO1     | <a href="#">NM_017545.2</a> | GOX;GOX1;HAOX1                  | (S)-2-       | peroxisom electron      |
| GI_11184237-S | 72.2   | 79.7   | 76.4   | LBX1     | <a href="#">NM_006562.3</a> | LBX1H                           | transcripti  | nucleus embryoge        |
| GI_11225606-S | 128.8  | 138.7  | 123.6  | IL1RAPL2 | <a href="#">NM_017416.1</a> | IL1R9;IL-1R9;TIGIRR-1;IL1RAPL-2 | interleukin- | membran central         |
| GI_11225608-S | 148.1  | 164    | 130.3  | ACE2     | <a href="#">NM_021804.1</a> | ACEH;DKFZP434A014               | zinc ion     | membran proteolysis     |
| GI_11231178-A | 445.7  | 541.9  | 490.1  | LAIR1    | <a href="#">NM_021708.1</a> | LAIR-1                          | transmem     | integral to immune      |
| GI_11231178-I | 127.3  | 159.4  | 145.6  | LAIR1    | <a href="#">NM_021708.1</a> | LAIR-1                          | transmem     | integral to immune      |
| GI_11276084-S | 100.2  | 98.8   | 102.4  | UGT1A9   | <a href="#">NM_021027.1</a> | HLUGP4                          | UDP-         | microsom metabolis      |
| GI_11277467-I | 1023.2 | 829.1  | 945.7  | SIVA     | <a href="#">NM_006427.2</a> | CD27BP                          | receptor     | induction               |
| GI_11277469-A | 2206.4 | 1843.4 | 2187   | SIVA     | <a href="#">NM_021709.1</a> | CD27BP                          | receptor     | induction               |
| GI_11321560-S | 237.7  | 271.9  | 240.6  | HPX      | <a href="#">NM_000613.1</a> |                                 | heme         | extracellul heme        |
| GI_11321570-S | 91.8   | 102.3  | 81.5   | SLIT3    | <a href="#">NM_003062.1</a> | MEGF5;SLIL2;SLIT1;Slit-3        | protein      | extracellul developm    |
| GI_11321574-S | 130.2  | 153.9  | 129.9  | LY6D     | <a href="#">NM_003695.1</a> | E48                             | cell         | peripheral cell         |
| GI_11321578-S | 236.6  | 259.6  | 262    | MYH13    | <a href="#">NM_003802.1</a> | MyHC-eo                         | muscle       | striated striated       |
| GI_11321580-S | 1404.4 | 1596.1 | 1363.9 | SUCLG1   | <a href="#">NM_003849.1</a> | SUCLA1                          | GTP          | mitochond glycolysis    |
| GI_11321582-S | 525.3  | 687    | 681.4  | SUCLA2   | <a href="#">NM_003850.1</a> | A-BETA                          | succinate-   | mitochond succinyl-     |
| GI_11321586-S | 237.1  | 262.1  | 241.1  | HFL1     | <a href="#">NM_002113.1</a> | CFHL;FHR1;H36-1                 | plasma       | extracellul compleme    |
| GI_11321592-S | 684.3  | 1249.2 | 1411.2 | IGFBP6   | <a href="#">NM_002178.1</a> |                                 |              |                         |
| GI_11321594-S | 158    | 187.9  | 183.4  | ITGA9    | <a href="#">NM_002207.1</a> | RLC;ITGA4L;ALPHA-RLC            | cell         | integrin cell           |
| GI_11321596-S | 448.5  | 539.2  | 469.4  | KDR      | <a href="#">NM_002253.1</a> | FLK1;VEGFR;VEGFR2               | vascular     | integral to transmem    |
| GI_11321604-S | 661.6  | 773.4  | 902    | JARID1C  | <a href="#">NM_004187.1</a> | SMCX;XE169;DXS1272E             | DNA          | nucleus regulation      |
| GI_11321616-S | 130.1  | 151    | 124.2  | DPYSL4   | <a href="#">NM_006426.1</a> | CRMP3;DRP-4;ULIP4               | hydrolase    | neurogene               |
| GI_11321627-S | 157.5  | 192.1  | 158.5  | CTRC     | <a href="#">NM_007272.1</a> | CLCR                            | peptidase    | proteolysis             |
| GI_11321629-S | 1020.6 | 1324.8 | 1522.7 | NR1H2    | <a href="#">NM_007121.1</a> | NER;UNR;LXR-b;NER-I;RIP15       | ligand-      | nucleus regulation      |
| GI_11321633-S | 63.3   | 67     | 67.5   | CD2AP    | <a href="#">NM_012120.1</a> | CMS;DKFZP586H0519               | structural   | actin substrate-        |
| GI_11321635-S | 104.5  | 111.8  | 109.6  | TPSD1    | <a href="#">NM_012217.1</a> |                                 | serine-      | proteolysis             |
| GI_11321641-S | 228.2  | 193.4  | 198.4  | BRD1     | <a href="#">NM_014577.1</a> | BRL;BRPF1;BRPF2;DKFZP434B094    |              |                         |
| GI_11342663-S | 125.5  | 271.1  | 153.4  | MX2      | <a href="#">NM_002463.1</a> | MXB                             | GTPase       | cytoplasm defense       |
| GI_11342665-S | 2210.6 | 4563.3 | 2621.8 | MMP2     | <a href="#">NM_004530.1</a> | CLG4;CLG4A;TBE-1                | gelatinase   | extracellul proteolysis |
| GI_11342671-S | 209.7  | 235.7  | 207.7  | MYH3     | <a href="#">NM_002470.1</a> | MYHSE1;MYHC-EMB                 | myosin       | striated muscle         |
| GI_11345453-S | 545.7  | 364.9  | 422.5  | FANCE    | <a href="#">NM_021922.1</a> | FAE;FACE                        | molecular    | nucleus                 |
| GI_11345457-S | 297.9  | 347.9  | 272.7  | FLJ21820 | <a href="#">NM_021925.1</a> |                                 | catalytic    | lipid                   |



|               |        |        |        |          |                             |                                  |             |              |
|---------------|--------|--------|--------|----------|-----------------------------|----------------------------------|-------------|--------------|
| GI_11345459-S | 325.5  | 391.2  | 321    | FLJ13220 | <a href="#">NM_021927.1</a> |                                  | small       | small        |
| GI_11345461-S | 425.7  | 731.3  | 594.9  | FLJ22649 | <a href="#">NM_021928.1</a> |                                  | peptidase   | microsom     |
| GI_11345471-S | 499    | 269.3  | 318.1  | FLJ12438 | <a href="#">NM_021933.1</a> | IIP45                            |             |              |
| GI_11345479-S | 3775.4 | 3216.3 | 3390.6 | C21orf97 | <a href="#">NM_021941.1</a> | FLJ21324                         |             |              |
| GI_11345483-S | 704.1  | 584.5  | 505.2  | TEX27    | <a href="#">NM_021943.1</a> | FLJ13222                         | molecular   |              |
| GI_11345485-S | 574.2  | 384.8  | 337    | C14orf93 | <a href="#">NM_021944.1</a> | FLJ12154                         |             |              |
| GI_11345491-S | 209    | 262.3  | 233    | SRR      | <a href="#">NM_021947.1</a> |                                  | lyase       | L-serine     |
| GI_11386138-S | 142.4  | 141.6  | 151.8  | PLCB3    | <a href="#">NM_000932.1</a> |                                  | phospholi   | membran      |
| GI_11386142-S | 222.5  | 283    | 221.1  | SERPINF2 | <a href="#">NM_000934.1</a> | AAP;API;PLI;A2AP;ALPHA-2-PI      | serpin      | Golgi        |
| GI_11386146-S | 7984.3 | 6679.3 | 7930.5 | PSAP     | <a href="#">NM_002778.1</a> | GLBA;SAP1                        | lipid       | lysosome     |
| GI_11386152-S | 348.6  | 486.5  | 420.8  | OR1E2    | <a href="#">NM_003554.1</a> | OR1E4;OR17-93;OR17-135           | receptor    | integral to  |
| GI_11386154-S | 147.8  | 170.1  | 152.9  | ATP2B3   | <a href="#">NM_021949.1</a> | PMCA3                            | adenosine   | integral to  |
| GI_11386156-S | 941.5  | 3018.6 | 2361.6 | CDA      | <a href="#">NM_001785.1</a> | CDD                              | cytidine    | nucleobas    |
| GI_11386170-S | 105.8  | 105.9  | 117.9  | CEACAM5  | <a href="#">NM_004363.1</a> | CEA;CD66e                        | tumor       | membran      |
| GI_11386172-S | 90.8   | 96.5   | 89.5   | DMRT1    | <a href="#">NM_021951.1</a> | DMT1                             | transcripti | nucleus      |
| GI_11386174-A | 2597.7 | 2571.9 | 2687.5 | PPP1R11  | <a href="#">NM_021959.1</a> | HCGV;HCG-V;TCTE5;TCTEX5          | protein     | soluble      |
| GI_11386184-S | 2434.6 | 2653.8 | 2103.6 | CBARA1   | <a href="#">NM_006077.1</a> | CALC;DKFZp564C246                | calcium     | intracellula |
| GI_11386190-S | 2935.5 | 2149.4 | 2225.7 | LGTN     | <a href="#">NM_006893.1</a> |                                  | receptor    | cytoplasm    |
| GI_11386194-S | 328.8  | 428.4  | 349.2  | FOXB1    | <a href="#">NM_012182.1</a> | FKH5;HFKH-5                      | transcripti | nucleus      |
| GI_11386196-S | 196.1  | 252.9  | 228    | FOXE3    | <a href="#">NM_012186.1</a> | ASMD;FKHL12;FREAC8               | transcripti | nucleus      |
| GI_11386198-S | 737.4  | 612.1  | 691.3  | PVRL3    | <a href="#">NM_015480.1</a> | PPR3;PRR3;PVRR3;nectin-          |             |              |
| GI_11386200-S | 607.5  | 686    | 656.4  | UGCGL2   | <a href="#">NM_020121.2</a> | HUGT2;FLJ10873;FLJ11485          | transferas  | endoplas     |
| GI_11415027-S | 121.6  | 151.6  | 142.4  | TCL1A    | <a href="#">NM_021966.1</a> | TCL1                             |             | microsom     |
| GI_11415031-S | 133.6  | 149.3  | 123    | OR1D4    | <a href="#">NM_003552.1</a> | OR17-30;OLFR17-30                | G-protein   | integral to  |
| GI_11415033-S | 164.5  | 191.8  | 165.3  | OR1G1    | <a href="#">NM_003555.1</a> | OR1G2;OR17-130;OR17-209          | olfactory   | integral to  |
| GI_11415035-S | 541.1  | 549.9  | 607.9  | ZNF148   | <a href="#">NM_021964.1</a> | BERF-1;BFCOL1;ZBP-89;ZFP148;pHZ- | specific    | DNA-         |
| GI_11415045-S | 195.4  | 247.2  | 237.3  | SERF1A   | <a href="#">NM_021967.1</a> | 4F5;H4F5;FAM2A;SERF1;SMAM1       | molecular   | cellular_co  |
| GI_11496238-S | 1556.7 | 1686.6 | 1811.8 | RELA     | <a href="#">NM_021975.1</a> | NFKB3                            | protein     | transcripti  |
| GI_11496266-S | 118.1  | 118    | 129.2  | ALX4     | <a href="#">NM_021926.1</a> | FPP;PFM;PFM1;PFM2;KIAA1788       | transcripti | nucleus      |
| GI_11496268-S | 1365.3 | 1591   | 1180.9 | ZNF277   | <a href="#">NM_021994.1</a> | NRIF4                            |             |              |
| GI_11496272-S | 172.9  | 231.9  | 153.3  | TMSNB    | <a href="#">NM_021992.1</a> |                                  | actin       | cytoskelet   |
| GI_11496274-S | 113.2  | 96.5   | 104.2  | OR1E1    | <a href="#">NM_003553.1</a> | HGM071;OR17-2;OR1E9P;OR17-32     | olfactory   | integral to  |
| GI_11496280-S | 104.2  | 116.2  | 109.5  | KLK13    | <a href="#">NM_015596.1</a> | KLKL4;KLK-L4;DKFZP586J1923       | trypsin     | extracellul  |
| GI_11496282-S | 215.7  | 203    | 152    | PLAC1    | <a href="#">NM_021796.1</a> |                                  | molecular   | cellular_co  |
| GI_11496880-S | 1170.8 | 1380.9 | 1586.7 | ELK1     | <a href="#">NM_005229.2</a> |                                  | transcripti | nucleus      |
| GI_11496883-S | 98.4   | 85.6   | 90.3   | CLPS     | <a href="#">NM_001832.2</a> |                                  | enzyme      | soluble      |
| GI_11496886-S | 190.7  | 241.5  | 225.6  | ADH1A    | <a href="#">NM_000667.2</a> | ADH1                             | alcohol     | cytoplasm    |
| GI_11496888-S | 101.2  | 112.3  | 106.3  | ADH1C    | <a href="#">NM_000669.2</a> | ADH3                             | alcohol     | cytoplasm    |
| GI_11496889-S | 92.5   | 100.6  | 97.1   | ADH4     | <a href="#">NM_000670.2</a> | ADH-2                            | electron-   | aldehyde     |
| GI_11496890-S | 2068.8 | 1911.6 | 1760.2 | ADH5     | <a href="#">NM_000671.2</a> | FDH;ADHX;ADH-3                   | formaldehy  | ethanol      |
| GI_11496969-S | 83.2   | 94.8   | 84.3   | ADH7     | <a href="#">NM_000673.2</a> | ADH-4                            | alcohol     | regulation   |
| GI_11496970-A | 208    | 250.8  | 224    | GRIN1    | <a href="#">NM_000832.4</a> | NR1;NMDA1;NMDAR1                 | N-methyl-   | integral to  |
| GI_11496977-S | 1458.4 | 1320   | 1527.4 | NFYC     | <a href="#">NM_014223.2</a> | HSM;CBFC;HAP5;CBF-C;NF-YC;H1TF2A | RNA         | protein      |
| GI_11496979-S | 517.9  | 411.4  | 365.2  | PMS1     | <a href="#">NM_000534.2</a> | PMSL1;hPMS1;HNPPC3               | DNA         | nucleus      |

|               |        |        |        |          |                             |                                     |             |              |             |
|---------------|--------|--------|--------|----------|-----------------------------|-------------------------------------|-------------|--------------|-------------|
| GI_11496980-A | 257.7  | 439.6  | 357.6  | SVIL     | <a href="#">NM_003174.2</a> |                                     | membran     | actin        | cytoskelet  |
| GI_11496980-I | 101.4  | 134.7  | 132.7  | SVIL     | <a href="#">NM_003174.2</a> |                                     | membran     | actin        | cytoskelet  |
| GI_11496981-I | 104.5  | 107    | 97.1   | SVIL     | <a href="#">NM_021738.1</a> |                                     | membran     | actin        | cytoskelet  |
| GI_11496985-S | 114.3  | 98.7   | 108.4  | C1QR1    | <a href="#">NM_012072.2</a> | CD93;C1qRP;C1qR(P);dJ737E23.1       | receptor    | integral to  | antimicrob  |
| GI_11496986-S | 127.4  | 142.7  | 135.4  | PART1    | <a href="#">NM_016590.2</a> | DKFZP586D0823                       |             |              |             |
| GI_11496987-S | 120.8  | 144.8  | 138.1  | RENBP    | <a href="#">NM_002910.4</a> | RBP;RNBP                            | endopepti   |              | regulation  |
| GI_11496988-S | 405.2  | 588.1  | 426.4  | GAA      | <a href="#">NM_000152.2</a> | LYAG                                | alpha-      | lysosome     | glycogen    |
| GI_11496989-S | 3291.9 | 2850.7 | 2977.4 | ADPRT    | <a href="#">NM_001618.2</a> | PARP;PPOL;ADPRT1;PARP-1;pADPRT-1    | NAD ADP-    | nucleus      | protein     |
| GI_11496990-S | 121.9  | 122.9  | 127    | ADPRTL1  | <a href="#">NM_006437.2</a> | PH5P;p193;PARPL;VPARP;VAULT3;KIAA01 | NAD ADP-    | nucleus      | DNA         |
| GI_11496991-S | 575.2  | 464.1  | 531    | ADPRTL2  | <a href="#">NM_005484.2</a> | PARP2;ADPRT2;PARP-                  | catalytic   | nucleus      | protein     |
| GI_11496992-S | 728.1  | 707.3  | 726.7  | ADPRTL3  | <a href="#">NM_005485.2</a> | PARP3;ADPRT3;PARP-                  | NAD ADP-    | nucleus      | protein     |
| GI_11496993-A | 114.8  | 112.8  | 98.2   | ADAM28   | <a href="#">NM_021777.1</a> | MDCL;ADAM23;MDC-Lm;MDC-Ls;eMDCII    | metallope   | integral to  | spermatog   |
| GI_11496993-I | 98.4   | 94     | 94     | ADAM28   | <a href="#">NM_021777.1</a> | MDCL;ADAM23;MDC-Lm;MDC-Ls;eMDCII    | metallope   | integral to  | spermatog   |
| GI_11496997-A | 199.2  | 253.6  | 243.7  | ADAM11   | <a href="#">NM_021612.1</a> | MDC                                 | integrin    | integral to  | integrin-   |
| GI_11496999-A | 157.1  | 180.8  | 163    | ADAM12   | <a href="#">NM_021641.1</a> | MCMP;MLTN;MLTNA;MCMPMItna           | metallope   | integral to  | myoblast    |
| GI_11496999-I | 96.4   | 95.2   | 88.4   | ADAM12   | <a href="#">NM_021641.1</a> | MCMP;MLTN;MLTNA;MCMPMItna           | metallope   | integral to  | myoblast    |
| GI_11497001-S | 913.2  | 745.6  | 463.8  | ADAM15   | <a href="#">NM_003815.2</a> | MDC15                               | metallope   | peripheral   | cell-matrix |
| GI_11497005-A | 1065   | 1130.6 | 853    | ADAM17   | <a href="#">NM_021832.1</a> | TACE;cSVP;CD156b                    | metallope   | peripheral   | cell-cell   |
| GI_11497600-I | 172.7  | 213.2  | 208.6  | ADAM29   | <a href="#">NM_014269.2</a> | svph1                               | metallope   | integral to  | spermatog   |
| GI_11497602-A | 106.4  | 122.5  | 119.9  | ADAM29   | <a href="#">NM_021779.1</a> | svph1                               | metallope   | integral to  | spermatog   |
| GI_11497606-S | 90.1   | 89     | 83.4   | ADAM2    | <a href="#">NM_001464.2</a> | FTNB;PH30;PH-30b                    | integrin    | integral to  | fusion of   |
| GI_11497611-A | 571    | 665    | 478.6  | GABBR1   | <a href="#">NM_021903.1</a> | GPRC3A;GABABR1                      | GABA-B      | kinesin      | negative    |
| GI_11497611-I | 242.8  | 310.1  | 276    | GABBR1   | <a href="#">NM_021903.1</a> | GPRC3A;GABABR1                      | GABA-B      | kinesin      | negative    |
| GI_11545742-S | 754.4  | 1418.1 | 1813.7 | SDF2L1   | <a href="#">NM_022044.1</a> |                                     |             | membran      |             |
| GI_11545750-S | 107.1  | 122.9  | 108.4  | CSNK1G1  | <a href="#">NM_022048.1</a> |                                     | ATP         |              | protein     |
| GI_11545752-S | 99.6   | 113.5  | 110.9  | GPR88    | <a href="#">NM_022049.1</a> | STRG                                | receptor    | integral to  | G-protein   |
| GI_11545756-S | 123.3  | 121.1  | 124.6  | NXF3     | <a href="#">NM_022052.1</a> |                                     | protein     | nucleus      | protein-    |
| GI_11545760-S | 164.9  | 139.6  | 107.2  | KCNK12   | <a href="#">NM_022055.1</a> | THIK2;THIK-2                        | voltage-    | integral to  | potassium   |
| GI_11545764-S | 417.2  | 462.6  | 349.3  | CXCL16   | <a href="#">NM_022059.1</a> | SRPSOX;CXCLG16;SR-PSOX              | cytokine    | integral to  | chemotaxi   |
| GI_11545766-S | 1311.9 | 927.3  | 683.5  | ABHD4    | <a href="#">NM_022060.1</a> | FLJ12816                            | hydrolase   |              | aromatic    |
| GI_11545768-S | 98.3   | 123.1  | 102.8  | PKNOX2   | <a href="#">NM_022062.1</a> | PREP2;FLJ13074                      | transcripti | nucleus      | regulation  |
| GI_11545770-S | 183.9  | 192.9  | 173.9  | C1orf84  | <a href="#">NM_022063.1</a> | FLJ13188;bA319I23.1                 |             |              |             |
| GI_11545792-S | 888.5  | 827.1  | 911.8  | FLJ12455 | <a href="#">NM_022078.1</a> |                                     | nucleic     | intracellula |             |
| GI_11545796-A | 290.4  | 275.4  | 276.3  | C1orf24  | <a href="#">NM_022083.1</a> | NIBAN                               | molecular   | cellular_co  | biological_ |
| GI_11545800-S | 920.7  | 839.1  | 1248.7 | GALNT11  | <a href="#">NM_022087.1</a> | FLJ21634                            |             |              |             |
| GI_11545810-S | 118.6  | 137.2  | 139.6  | LOC63928 | <a href="#">NM_022097.1</a> |                                     | calcium     |              |             |
| GI_11545816-S | 631.8  | 638.2  | 376.4  | GPSM3    | <a href="#">NM_022107.1</a> | G18;NG1;G18.2;C6orf9;G18.1a;G18.1b  |             |              |             |
| GI_11545826-S | 225.1  | 252.2  | 241.3  | P53AIP1  | <a href="#">NM_022112.1</a> |                                     | molecular   | mitochond    | apoptosis   |
| GI_11545834-S | 341.4  | 401.5  | 381.7  | SE20-4   | <a href="#">NM_022117.1</a> | CDA1;CTCL;DENTT;HRIHFB2216          | DNA         | nucleus      | nucleoso    |
| GI_11545840-S | 110.8  | 135.2  | 117.8  | OXCT2    | <a href="#">NM_022120.1</a> | FKSG25;SCOT-T;FLJ00030              | CoA-        |              | metabolis   |
| GI_11545844-S | 102.8  | 94.6   | 92.3   | MMP27    | <a href="#">NM_022122.1</a> | MMP-27                              | zinc ion    | extracellul  | proteolysis |
| GI_11545846-I | 130.6  | 123.7  | 125.5  | NPAS3    | <a href="#">NM_022123.1</a> | MOP6                                |             |              |             |
| GI_11545852-S | 125.8  | 113.3  | 118.7  | SLC28A3  | <a href="#">NM_022127.1</a> | CNT3                                | nucleoside  | membran      | transport   |
| GI_11545854-S | 260.4  | 299.2  | 279.3  | RBKS     | <a href="#">NM_022128.1</a> | RBSK                                | ribokinase  |              | D-ribose    |

|               |        |        |        |          |                             |                                |             |                         |
|---------------|--------|--------|--------|----------|-----------------------------|--------------------------------|-------------|-------------------------|
| GI_11545856-S | 126.3  | 151.9  | 164.2  | MAWBP    | <a href="#">NM_022129.1</a> | molecular                      | cellular_co | biological_             |
| GI_11545860-S | 135.7  | 177.8  | 141.8  | CLSTN2   | <a href="#">NM_022131.1</a> | calcium                        | integral to | homophili               |
| GI_11545866-S | 134.1  | 139    | 124    | GP3ST    | <a href="#">NM_022134.1</a> | sulfotransf                    | membran     | biological_             |
| GI_11545882-S | 118    | 135.3  | 115    | TNMD     | <a href="#">NM_022144.1</a> | TEM;CHM1L;BRICD4;CHM1-LIKE     | integral to |                         |
| GI_11545886-S | 124.8  | 140    | 127.1  | OT7T022  | <a href="#">NM_022146.1</a> | NPFF1                          | neuropepti  | integral to G-protein   |
| GI_11545889-S | 141.8  | 168    | 160.3  | IFRG28   | <a href="#">NM_022147.1</a> |                                | integral to |                         |
| GI_11545911-S | 101.9  | 161.1  | 103.3  | CARD15   | <a href="#">NM_022162.1</a> | CD;ACUG;BLAU;IBD1;NOD2;PSORAS1 | ATP         | intracellula apoptosis  |
| GI_11545913-S | 361.7  | 514.9  | 548.2  | XYLT2    | <a href="#">NM_022167.1</a> | XT2;XT-II;xyIT-II              | acetylgluc  | membran glycosami       |
| GI_11545917-S | 122.7  | 288.4  | 168    | LCN7     | <a href="#">NM_022164.1</a> | ARG1;LIECG3                    | extracellul | extracellul transport   |
| GI_11545919-S | 153.6  | 133    | 178.7  | LIN7B    | <a href="#">NM_022165.1</a> | VELI2;LIN-7B;MALS-2            | protein     | intracellula            |
| GI_11545925-S | 113.2  | 116.5  | 103.6  | DAMS     | <a href="#">NM_022001.1</a> |                                |             |                         |
| GI_11559922-I | 202.8  | 253.7  | 235    | WBSCR1   | <a href="#">NM_022170.1</a> | EIF4H;WSCR1;KIAA0038           | translation | eukaryotic regulation   |
| GI_11559926-S | 736    | 880.5  | 810.6  | MRPS14   | <a href="#">NM_022100.1</a> | MRP-S14;HSMRPS14;DJ262D12.2    | structural  | mitochond protein       |
| GI_11560140-S | 505.5  | 702.7  | 753.3  | TCTA     | <a href="#">NM_022171.1</a> |                                | tumor       |                         |
| GI_11612654-S | 185.2  | 207.9  | 163    | FXYD6    | <a href="#">NM_022003.1</a> |                                | ion         | integral to ion         |
| GI_11612658-S | 491.2  | 647.9  | 555.8  | FXYD7    | <a href="#">NM_022006.1</a> |                                | ion         | integral to ion         |
| GI_11612673-I | 126.9  | 135.8  | 135.4  | FXYD3    | <a href="#">NM_021910.1</a> | MAT8;PLML;MAT-8                | chloride    | integral to chloride    |
| GI_11612675-A | 218.5  | 263.8  | 237.8  | FXYD3    | <a href="#">NM_005971.2</a> | MAT8;PLML;MAT-8                | chloride    | integral to chloride    |
| GI_11641230-S | 261.8  | 318.1  | 283.4  | EDAR     | <a href="#">NM_022336.1</a> | DL;ED3;ED5;ED1R;EDA3;EDA-A1R   | transmem    | integral to apoptosis   |
| GI_11641236-S | 109.5  | 116.2  | 107.9  | RAB38    | <a href="#">NM_022337.1</a> | NY-MEL-1                       | GTP         | cellular_co small       |
| GI_11641238-S | 427.5  | 651.9  | 509.4  | C11orf24 | <a href="#">NM_022338.1</a> | DM4E3                          |             |                         |
| GI_11641240-S | 108.5  | 112.3  | 119.6  | ZFYVE20  | <a href="#">NM_022340.1</a> | Rabenosyn-5                    | zinc ion    | endosome endosome       |
| GI_11641242-S | 176.4  | 213.2  | 180.4  | PDF      | <a href="#">NM_022341.1</a> |                                | molecular   | mitochond protein       |
| GI_11641254-S | 171.6  | 192.4  | 165.8  | IFRG15   | <a href="#">NM_022347.1</a> |                                |             |                         |
| GI_11641260-S | 1112.1 | 1400.5 | 1333.4 | LRAP     | <a href="#">NM_022350.1</a> | L-RAP                          |             |                         |
| GI_11641264-S | 445.8  | 388.8  | 336.6  | OSGEPL1  | <a href="#">NM_022353.1</a> |                                |             |                         |
| GI_11641266-S | 108.8  | 105.1  | 96.2   | SPATA1   | <a href="#">NM_022354.1</a> | SP-2;SPAP1                     |             |                         |
| GI_11641268-S | 168.4  | 232.9  | 196.2  | DPEP2    | <a href="#">NM_022355.1</a> |                                |             |                         |
| GI_11641272-S | 171.4  | 201.1  | 175.2  | DPEP3    | <a href="#">NM_022357.1</a> |                                | membran     | proteolysis             |
| GI_11641288-S | 1871.9 | 1568.5 | 1471.9 | TFB2M    | <a href="#">NM_022366.1</a> | Hkp1;FLJ22661;FLJ23182         | rRNA        | rRNA                    |
| GI_11641302-S | 104.7  | 104.1  | 100.7  | ARL6IP2  | <a href="#">NM_022374.1</a> | FLJ23293                       |             |                         |
| GI_11641403-S | 221.5  | 287.6  | 266    | CKMT1    | <a href="#">NM_020990.2</a> | CKMT;UMTCK                     | creatine    | mitochond               |
| GI_11641404-S | 147.5  | 165.5  | 144.1  | CLCN4    | <a href="#">NM_001830.2</a> | CLC4;CIC-4                     | voltage-    | membran small           |
| GI_11641410-A | 712    | 857    | 553.3  | CDC25B   | <a href="#">NM_021872.1</a> |                                | protein     | positive                |
| GI_11641414-I | 123.4  | 140.4  | 130.3  | CDC25B   | <a href="#">NM_021874.1</a> |                                | protein     | positive                |
| GI_11641417-S | 111.9  | 117.3  | 100    | GDF10    | <a href="#">NM_004962.2</a> | BMP3B;BMP-3b                   | growth      | nucleus TGFbeta         |
| GI_11641418-S | 110.5  | 124.9  | 129.8  | GDF11    | <a href="#">NM_005811.2</a> | BMP11;BMP-11                   | cytokine    | cellular_co mesoderm    |
| GI_11641419-S | 91     | 89.7   | 86.2   | GDF1     | <a href="#">NM_001492.3</a> |                                | cytokine    | extracellul cell growth |
| GI_11641422-A | 1076.5 | 1308.7 | 1049.2 | USP9X    | <a href="#">NM_021906.1</a> | DFFRX                          | cysteine-   | deubiquiti              |
| GI_11641426-S | 246.3  | 263.4  | 243.7  | USP9Y    | <a href="#">NM_004654.2</a> | DFFRY                          | ubiquitin-  | deubiquiti              |
| GI_11761614-A | 266.8  | 451.9  | 538.1  | PC       | <a href="#">NM_022172.1</a> | PCB                            | pyruvate    | mitochond biotin        |
| GI_11761614-I | 102.6  | 108.3  | 115.4  | PC       | <a href="#">NM_022172.1</a> | PCB                            | pyruvate    | mitochond biotin        |
| GI_11761618-I | 215.5  | 248.1  | 250    | GMPPB    | <a href="#">NM_013334.2</a> | KIAA1851                       |             |                         |
| GI_11761620-A | 182.2  | 278.4  | 271.4  | GMPPB    | <a href="#">NM_021971.1</a> | KIAA1851                       |             |                         |

|               |         |        |        |          |                             |                                    |             |             |              |
|---------------|---------|--------|--------|----------|-----------------------------|------------------------------------|-------------|-------------|--------------|
| GI_11761622-I | 182.7   | 206.2  | 188.6  | PC       | <a href="#">NM_000920.2</a> | PCB                                | pyruvate    | mitochond   | biotin       |
| GI_11761623-A | 458     | 421.7  | 570.7  | ST7      | <a href="#">NM_018412.2</a> | HELG;RAY1;SEN4;TSG7;ETS7q;FAM4A1;S |             |             |              |
| GI_11761623-I | 612.3   | 497.8  | 728    | ST7      | <a href="#">NM_018412.2</a> | HELG;RAY1;SEN4;TSG7;ETS7q;FAM4A1;S |             |             |              |
| GI_11761625-I | 427.1   | 355.4  | 383.7  | ST7      | <a href="#">NM_021908.1</a> | HELG;RAY1;SEN4;TSG7;ETS7q;FAM4A1;S |             |             |              |
| GI_11761627-I | 100.7   | 89.6   | 85.6   | FGA      | <a href="#">NM_000508.2</a> |                                    | fibrinogen  | soluble     | positive     |
| GI_11761628-A | 101.3   | 108.7  | 102.1  | FGA      | <a href="#">NM_021871.1</a> |                                    | fibrinogen  | soluble     | positive     |
| GI_11761628-I | 121.4   | 114.6  | 97.1   | FGA      | <a href="#">NM_021871.1</a> |                                    | fibrinogen  | soluble     | positive     |
| GI_11761630-S | 107.6   | 93.2   | 95     | FGB      | <a href="#">NM_005141.1</a> |                                    | fibrinogen  | fibrinogen  | positive     |
| GI_11761632-I | 107.8   | 129.1  | 108.2  | FGG      | <a href="#">NM_021870.1</a> |                                    | fibrinogen  | fibrinogen  | positive     |
| GI_11761634-A | 107.2   | 117.4  | 92     | FGG      | <a href="#">NM_000509.3</a> |                                    | fibrinogen  | fibrinogen  | positive     |
| GI_11761634-I | 90.5    | 98.6   | 91.7   | FGG      | <a href="#">NM_000509.3</a> |                                    | fibrinogen  | fibrinogen  | positive     |
| GI_11761636-S | 104.6   | 104.9  | 97.5   | ACTL7A   | <a href="#">NM_006687.2</a> |                                    | structural  | cytoskelet  |              |
| GI_11761637-S | 108.7   | 96.2   | 107.2  | ACTL7B   | <a href="#">NM_006686.2</a> |                                    | structural  | actin       |              |
| GI_11863127-A | 468     | 422.4  | 558.2  | PIGA     | <a href="#">NM_020473.1</a> | GPI3;PIG-A                         | catalytic   | endoplas    | biosynthes   |
| GI_11863129-I | 132.9   | 152.5  | 153.9  | PIGA     | <a href="#">NM_002641.1</a> | GPI3;PIG-A                         | catalytic   | endoplas    | biosynthes   |
| GI_11863131-A | 138.1   | 150.7  | 143    | NR1I2    | <a href="#">NM_022002.1</a> | BXR;PAR;PRR;PXR;SAR;SXR;ONR1;PAR1; | ligand-     |             | steroid      |
| GI_11863131-I | 101.9   | 112.6  | 99.1   | NR1I2    | <a href="#">NM_022002.1</a> | BXR;PAR;PRR;PXR;SAR;SXR;ONR1;PAR1; | ligand-     |             | steroid      |
| GI_11863151-S | 801.2   | 1058.5 | 1127.2 | JARID2   | <a href="#">NM_004973.2</a> | JMJ                                | DNA         | nucleus     | central      |
| GI_11863155-S | 145.8   | 172.6  | 114.8  | RECK     | <a href="#">NM_021111.1</a> | ST15;hRECK                         | metalloen   | membran     | cell growth  |
| GI_11863157-S | 2952.1  | 3062   | 3203.1 | RING1    | <a href="#">NM_002931.2</a> | RNF1                               | zinc ion    | nucleus     | regulation   |
| GI_11863158-S | 4976.8  | 5662.3 | 3539.8 | RYK      | <a href="#">NM_002958.1</a> | RYK1;D3S3195                       | transmem    | integral to | signal       |
| GI_11863160-A | 490.2   | 931.3  | 602.3  | TIA1     | <a href="#">NM_022037.1</a> |                                    | poly(A)     | secretory   | induction    |
| GI_11863164-S | 340.1   | 337.2  | 281    | TPRT     | <a href="#">NM_014317.2</a> | TPT                                | transferas  |             | isoprenoid   |
| GI_11967980-S | 106.1   | 127.8  | 99.9   | RAB17    | <a href="#">NM_022449.1</a> | FLJ12538                           | GTP         |             | small        |
| GI_11967986-S | 457.9   | 534.1  | 511.7  | FBS1     | <a href="#">NM_022452.1</a> | FBS;FLJ11618                       |             |             |              |
| GI_11968022-S | 579.5   | 536    | 540.1  | ZFP106   | <a href="#">NM_022473.1</a> | ZNF474                             |             |             |              |
| GI_11968026-S | 1077.8  | 947.8  | 692.6  | FTS      | <a href="#">NM_022476.1</a> | FT1;FLJ13258                       | ubiquitin   |             | ubiquitin    |
| GI_11968040-S | 471.4   | 432.8  | 467.2  | DCLRE1C  | <a href="#">NM_022487.1</a> | SCIDA;SNM1C;ARTEMIS;RS-            |             |             |              |
| GI_11968044-S | 6394.6  | 4257.7 | 4295.6 | FLJ22056 | <a href="#">NM_022489.1</a> |                                    |             |             |              |
| GI_11968046-S | 2092.5  | 1479.2 | 1279.7 | PAF53    | <a href="#">NM_022490.1</a> | FLJ13390;FLJ13970                  |             |             |              |
| GI_11968048-S | 769.9   | 814.6  | 846.1  | FLJ12788 | <a href="#">NM_022492.1</a> |                                    |             |             |              |
| GI_11968050-S | 187.3   | 215.7  | 215.8  | NARFL    | <a href="#">NM_022493.1</a> | PRN;HPRN;FLJ21988                  |             |             |              |
| GI_11968052-S | 1864.6  | 1353.5 | 1293.8 | ZDHHC6   | <a href="#">NM_022494.1</a> | ZNF376;FLJ21952                    | zinc ion    | integral to | regulation   |
| GI_11968151-S | 122.1   | 137    | 123.4  | SHANK1   | <a href="#">NM_016148.1</a> | SSTRIP;SPANK-1;synamon             | protein     | nucleus     | intracellula |
| GI_11968153-S | 187     | 200.8  | 214.3  | KIR2DL5  | <a href="#">NM_020535.1</a> | CD158F                             | receptor    |             |              |
| GI_11991659-S | 110.8   | 113.3  | 106.2  | SEMA6A   | <a href="#">NM_020796.1</a> | VIA;SEMA;HT018;SEMAQ;SEMA6A1;KIAA1 |             |             |              |
| GI_11993934-S | 328.6   | 535.9  | 416.8  | CHI3L2   | <a href="#">NM_004000.1</a> | YKL39;YKL-39                       | hydrolase   | extracellul | metabolis    |
| GI_11993942-S | 3431.7  | 4733.4 | 5508.4 | TIP-1    | <a href="#">NM_014604.1</a> |                                    | protein     | cytoplasm   | intracellula |
| GI_11995467-S | 15807.6 | 19271  | 10971  | IFITM3   | <a href="#">NM_021034.1</a> | 1-8U                               |             | integral to | immune       |
| GI_11995473-S | 146.9   | 173.4  | 144.8  | GSK3A    | <a href="#">NM_019884.1</a> |                                    | cAMP-       |             | protein      |
| GI_12007645-S | 131.4   | 130.9  | 122.2  | NYX      | <a href="#">NM_022567.1</a> | CLRP;CSNB1;CSNB4                   | molecular   | extracellul | vision       |
| GI_12007649-S | 104.4   | 100    | 100.9  | NDST4    | <a href="#">NM_022569.1</a> |                                    | sulfotransf |             |              |
| GI_12025664-S | 1482.4  | 1813.8 | 1457.9 | UBE2V2   | <a href="#">NM_003350.2</a> | MMS2;UEV2;EDPF1;UEV-2;DDVIT1;EDAF- | ubiquitin   |             | protein      |
| GI_12025666-S | 115     | 141.8  | 137.7  | CLCA4    | <a href="#">NM_012128.2</a> | CaCC;CaCC2                         | chloride    | integral to | small        |

|               |        |        |        |           |                             |                                       |             |             |              |
|---------------|--------|--------|--------|-----------|-----------------------------|---------------------------------------|-------------|-------------|--------------|
| GI_12025669-S | 4690.3 | 5387.8 | 5017.5 | ACTN1     | <a href="#">NM_001102.2</a> |                                       | structural  | actin       |              |
| GI_12025672-A | 501.4  | 502.9  | 418.7  | CLCN6     | <a href="#">NM_021737.1</a> | CLC-6;KIAA0046                        | chloride    | membran     | small        |
| GI_12056462-S | 163    | 1704.6 | 3584.6 | F8A       | <a href="#">NM_012151.2</a> | HAP40;DXS522E                         | molecular   | cellular_co | biological_  |
| GI_12056464-S | 3112.8 | 2064.4 | 1821.1 | FBL       | <a href="#">NM_001436.2</a> | FIB;FLRN;RNU3IP1                      | RNA         | small       | rRNA         |
| GI_12056466-S | 188.5  | 204.1  | 186.4  | CRYBB3    | <a href="#">NM_004076.3</a> | CRYB3                                 | structural  |             | vision       |
| GI_12056467-A | 317.2  | 1957.4 | 1489.5 | JUP       | <a href="#">NM_021991.1</a> | DP3;PDGB;PKGB;DPIII                   | cytoskelet  | soluble     | cell         |
| GI_12056469-S | 213.6  | 269.9  | 233    | RAI2      | <a href="#">NM_021785.2</a> |                                       | molecular   | cellular_co | embryonic    |
| GI_12056470-S | 610.9  | 2181.8 | 1670.3 | RAI3      | <a href="#">NM_003979.2</a> | RAIG1;GPRC5A                          | G-protein   | membran     | signal       |
| GI_12056472-S | 1151.3 | 1053.2 | 1032.7 | NANS      | <a href="#">NM_018946.2</a> | SAS                                   |             |             |              |
| GI_12056477-S | 890.6  | 667    | 426.6  | UCN       | <a href="#">NM_003353.2</a> | UI;UROC                               | neuropepti  | extracellul | G-protein    |
| GI_12056478-I | 104.2  | 107.3  | 117.3  | UTS2      | <a href="#">NM_021995.1</a> | UII;U-II;UCN2                         | G-protein   | extracellul | pan-neural   |
| GI_12056480-A | 162.3  | 212.1  | 201.2  | UTS2      | <a href="#">NM_006786.2</a> | UII;U-II;UCN2                         | G-protein   | extracellul | pan-neural   |
| GI_12056480-I | 133    | 146.5  | 122.3  | UTS2      | <a href="#">NM_006786.2</a> | UII;U-II;UCN2                         | G-protein   | extracellul | pan-neural   |
| GI_12056481-S | 208.8  | 227.8  | 204.1  | ZNF235    | <a href="#">NM_004234.3</a> | HZF6;ZFP93;ANF270;ZNF270              | DNA         | nucleus     | regulation   |
| GI_12056483-S | 228.8  | 170.9  | 159.1  | ZNF197    | <a href="#">NM_006991.2</a> | P18;VHLAK;ZNF20;ZNF166;D3S1363E       | transcripti |             |              |
| GI_12056970-S | 1913.4 | 1459.5 | 1390.7 | ANAPC1    | <a href="#">NM_022662.1</a> | APC1;MCPR;TSG24                       |             |             |              |
| GI_12056972-S | 136.7  | 136.1  | 125.2  | EBF2      | <a href="#">NM_022659.1</a> | COE2;FLJ11500                         | DNA         | nucleus     | regulation   |
| GI_12056974-S | 81.8   | 92.7   | 80.7   | CTAGE-1   | <a href="#">NM_022663.1</a> |                                       |             |             |              |
| GI_12225239-S | 101    | 118.1  | 102.2  | STAB1     | <a href="#">NM_015136.1</a> | FEEL-1;FELE-1;STAB-1;KIAA0246         | hyaluronic  |             | electron     |
| GI_12232372-S | 1519.6 | 1581   | 1575.5 | RABGAP1   | <a href="#">NM_012197.2</a> | GAPCENA;TBC1D11                       | tubulin     | centrosom   | cell cycle   |
| GI_12232384-S | 1112.3 | 1227   | 1338.3 | COPS7B    | <a href="#">NM_022730.1</a> | FLJ12612                              |             |             |              |
| GI_12232386-S | 2985.4 | 3701.1 | 2833.9 | NUCKS     | <a href="#">NM_022731.1</a> | JC7;FLJ21480                          | DNA         | nucleus     | regulation   |
| GI_12232388-S | 1123.4 | 1188.8 | 1050   | FLJ20859  | <a href="#">NM_022734.1</a> |                                       |             |             |              |
| GI_12232392-S | 1740.8 | 2495.2 | 2673.7 | FLJ14153  | <a href="#">NM_022736.1</a> |                                       |             |             |              |
| GI_12232394-S | 481.9  | 681.1  | 638.8  | LPPR2     | <a href="#">NM_022737.1</a> | FLJ13055                              |             |             |              |
| GI_12232400-S | 1068.8 | 1159   | 909.6  | SMYD3     | <a href="#">NM_022743.1</a> | ZMYND1;ZNFN3A1;FLJ21080               |             |             |              |
| GI_12232402-S | 3437.3 | 3362.6 | 3102.1 | FLJ13868  | <a href="#">NM_022744.1</a> |                                       |             |             |              |
| GI_12232406-S | 116.6  | 118.3  | 102    | C14orf136 | <a href="#">NM_022747.1</a> | FLJ22558                              |             |             |              |
| GI_12232412-S | 275.6  | 326.6  | 281.4  | ZC3HDC1   | <a href="#">NM_022750.1</a> | FLJ22693                              | nucleic     |             |              |
| GI_12232414-S | 114.7  | 133.9  | 170    | C18orf11  | <a href="#">NM_022751.1</a> | FLJ21610                              |             |             |              |
| GI_12232418-S | 713.7  | 601.9  | 590.6  | FLJ12903  | <a href="#">NM_022753.1</a> |                                       |             |             |              |
| GI_12232428-S | 452.2  | 412.3  | 345    | FLJ21865  | <a href="#">NM_022759.1</a> | DKFZp434P174                          |             |             |              |
| GI_12232430-S | 168.6  | 192.9  | 162.3  | C11orf1   | <a href="#">NM_022761.1</a> | FLJ23499                              |             |             |              |
| GI_12232436-S | 382.2  | 406.2  | 295.8  | FLJ12998  | <a href="#">NM_022764.1</a> | FLJ13893                              | nucleic     |             | metabolis    |
| GI_12232446-S | 1291.2 | 907.5  | 805.2  | TORC3     | <a href="#">NM_022769.1</a> | FLJ21868                              |             |             |              |
| GI_12232454-S | 275    | 359.7  | 287.5  | FLJ12681  | <a href="#">NM_022773.1</a> | FLJ22302                              |             |             |              |
| GI_12232456-S | 230.2  | 294.6  | 250.8  | FLJ21144  | <a href="#">NM_022774.1</a> | FLJ11445;FLJ13183                     |             |             |              |
| GI_12232462-S | 122    | 132.5  | 140.4  | RABL5     | <a href="#">NM_022777.1</a> | FLJ13225;FLJ14117;DKFZp761N0823       |             |             |              |
| GI_12232472-S | 137.7  | 316.8  | 154.9  | DEPDC6    | <a href="#">NM_022783.1</a> | DEP.6;FLJ12428;FLJ13854;DKFZp564B1778 | protein     |             | intracellula |
| GI_12232474-S | 102.2  | 96.1   | 96.2   | FLJ12476  | <a href="#">NM_022784.1</a> | DKFZp434F2114                         |             |             |              |
| GI_12232478-S | 1486.7 | 1402.3 | 1399.7 | ARV1      | <a href="#">NM_022786.1</a> |                                       |             |             |              |
| GI_12383050-S | 93.4   | 103.1  | 101.8  | TMEFF2    | <a href="#">NM_016192.2</a> | TR;HPP1;TENB2                         | serine      |             |              |
| GI_12383052-S | 742    | 739.4  | 499.8  | TULP4     | <a href="#">NM_020245.2</a> | TUSP;KIAA1397                         | transcripti | cellular_co | response     |
| GI_12383057-S | 148.6  | 169    | 153.4  | PLA2G2F   | <a href="#">NM_022819.1</a> |                                       | calcium-    | cellular_co | biological_  |

|               |         |        |        |          |                             |                                     |             |              |             |
|---------------|---------|--------|--------|----------|-----------------------------|-------------------------------------|-------------|--------------|-------------|
| GI_12383061-S | 1640.6  | 1722.4 | 2591.1 | KLC2     | <a href="#">NM_022822.1</a> | FLJ12387                            | microtubul  | kinesin      | microtubul  |
| GI_12383063-S | 123.7   | 149.2  | 123.7  | FNDC4    | <a href="#">NM_022823.1</a> | FRCP1;FLJ22362                      |             |              |             |
| GI_12383065-S | 639.5   | 728.9  | 657.3  | AXOT     | <a href="#">NM_022826.1</a> | AXO;DKFZP586F1122                   |             |              |             |
| GI_12383073-S | 2060.4  | 1748.5 | 1602.9 | FLJ22347 | <a href="#">NM_022830.1</a> | FLJ21850;FLJ22267                   | nucleic     |              |             |
| GI_12383075-S | 604.5   | 669.2  | 507.7  | FLJ12806 | <a href="#">NM_022831.1</a> |                                     |             |              |             |
| GI_12383083-S | 93.7    | 110.8  | 103.9  | FLJ22833 | <a href="#">NM_022837.1</a> | FLJ13624                            |             |              |             |
| GI_12383091-S | 182.9   | 192.1  | 161    | FLJ12994 | <a href="#">NM_022841.1</a> | FLJ21104                            |             |              |             |
| GI_12408637-A | 97.8    | 101.7  | 102.1  | XT3      | <a href="#">NM_022405.1</a> |                                     | transporte  | plasma       | small       |
| GI_12408641-S | 1025.7  | 954.1  | 930.8  | BRD2     | <a href="#">NM_005104.2</a> | NAT;RNF3;FSRG1;RING3;D6S113E;KIAA90 | protein     | nucleus      | spermatog   |
| GI_12408642-S | 485.1   | 594.9  | 638.5  | BRD3     | <a href="#">NM_007371.2</a> | ORFX;RING3L;KIAA0043                | molecular   | nucleus      | biological_ |
| GI_12408643-A | 265.6   | 447.9  | 360    | XRCC4    | <a href="#">NM_003401.2</a> |                                     |             |              | double-     |
| GI_12408644-S | 171.5   | 149.7  | 159.1  | XRCC3    | <a href="#">NM_005432.2</a> |                                     | DNA         | nucleus      | response    |
| GI_12408645-S | 16603.5 | 13853  | 12662  | CAPN2    | <a href="#">NM_001748.3</a> | mCANP;CANPL2;CANPml                 | cysteine-   | intracellula | proteolysis |
| GI_12408650-S | 7748.5  | 7672.4 | 7408.3 | XRCC5    | <a href="#">NM_021141.2</a> | KU80;Ku86;NFIV;KARP1;KARP-1         | double-     | nucleus      | double-     |
| GI_12408653-S | 554     | 866.7  | 1004.6 | B3GAT3   | <a href="#">NM_012200.2</a> | GLCATI;GlcAT-I                      | galactosyl  | Golgi        | glycosami   |
| GI_12408655-S | 3493.4  | 3796.1 | 4232.1 | CAPN1    | <a href="#">NM_005186.2</a> | CANP;muCL;CANPL1;muCANP             | calpain     | intracellula | positive    |
| GI_12408657-A | 126.3   | 121.3  | 129.3  | CDC25C   | <a href="#">NM_022809.1</a> | CDC25                               | prenylated  | nucleus      | regulation  |
| GI_12408659-I | 128.9   | 136.2  | 148.7  | CDC25C   | <a href="#">NM_001790.2</a> | CDC25                               | prenylated  | nucleus      | regulation  |
| GI_12408664-A | 140.5   | 149.4  | 150.2  | MAL      | <a href="#">NM_022440.1</a> |                                     | channel/p   | insoluble    | hemocyte    |
| GI_12408674-S | 6227.5  | 4699.4 | 4314   | PFDN2    | <a href="#">NM_012394.2</a> | PFD2                                | chaperone   | prefoldin    | protein     |
| GI_12408676-S | 156     | 149.2  | 160.2  | PFDN4    | <a href="#">NM_002623.2</a> | C1;C-1;PFD4                         | co-         | cytosol      | protein     |
| GI_12545377-A | 115.1   | 116.1  | 118.3  | CSHL1    | <a href="#">NM_022580.1</a> | CSL;CS-5;CSHP1;hCS-L                | hormone     | extracellul  | biological_ |
| GI_12545379-S | 101.4   | 109    | 95.6   | SCT      | <a href="#">NM_021920.2</a> |                                     | hormone     | extracellul  | pancreatic  |
| GI_12545383-S | 93.3    | 105.6  | 91.3   | HAND2    | <a href="#">NM_021973.1</a> | Hed;dHand;DHAND2;Thing2             | transcripti | nucleus      | heart       |
| GI_12545386-S | 144.5   | 179.9  | 165.6  | CPNE6    | <a href="#">NM_006032.2</a> | N-COPINE                            | transporte  |              | vesicle-    |
| GI_12545388-S | 1223.2  | 1126.1 | 1072   | HS2ST1   | <a href="#">NM_012262.2</a> | KIAA0448                            | transferas  |              |             |
| GI_12545394-I | 96.2    | 115.1  | 119.2  | ICA1     | <a href="#">NM_022307.1</a> | ICA69;ICAp69                        |             | cytoplasm    |             |
| GI_12545396-I | 267.4   | 277.1  | 237.9  | ICA1     | <a href="#">NM_022308.1</a> | ICA69;ICAp69                        |             | cytoplasm    |             |
| GI_12545398-S | 441.4   | 539.2  | 109    | ICAM2    | <a href="#">NM_000873.2</a> | CD102                               | integrin    | integral to  | cell-cell   |
| GI_12545399-S | 325.1   | 322    | 308.9  | ICAM3    | <a href="#">NM_002162.2</a> | CD50;CDW50;ICAM-R                   | integrin    | proteoglyc   | cell-cell   |
| GI_12545400-A | 124     | 137.2  | 123.7  | ICAM4    | <a href="#">NM_001544.2</a> | LW                                  | integrin    | integral to  |             |
| GI_12545401-I | 125.9   | 106.6  | 119.7  | ICAM4    | <a href="#">NM_022377.1</a> | LW                                  | integrin    | integral to  |             |
| GI_12545403-S | 199.3   | 513.9  | 452.6  | ICAM5    | <a href="#">NM_003259.2</a> | TLN;TLCN                            | cell        | integral to  | cell-cell   |
| GI_12545405-A | 4380.5  | 2888.2 | 2542.2 | RASA1    | <a href="#">NM_022650.1</a> | GAP;PKWS;RASA;CMAVM;RASGAP;p120G    | Ras         |              | cell growth |
| GI_12545405-I | 115.5   | 119.8  | 93.7   | RASA1    | <a href="#">NM_022650.1</a> | GAP;PKWS;RASA;CMAVM;RASGAP;p120G    | Ras         |              | cell growth |
| GI_12545407-S | 131.6   | 120.1  | 124.5  | RASA2    | <a href="#">NM_006506.2</a> | GAP1M                               | Ras         |              | signal      |
| GI_12548775-S | 205.6   | 239.1  | 208.9  | GABRB1   | <a href="#">NM_000812.2</a> |                                     | GABA-A      | integral to  | small       |
| GI_12548784-I | 154.4   | 160.6  | 142.3  | GABRB2   | <a href="#">NM_021911.1</a> |                                     | GABA-A      | integral to  | gamma-      |
| GI_12597621-S | 556.4   | 573.7  | 515    | CLPX     | <a href="#">NM_006660.3</a> |                                     | chaperoni   | mitochond    | protein     |
| GI_12597624-S | 1023.3  | 696.5  | 986.7  | ATF5     | <a href="#">NM_012068.2</a> | ATFX                                | transcripti | nucleus      | regulation  |
| GI_12597630-S | 261.4   | 284.8  | 303.9  | FLJ12448 | <a href="#">NM_022895.1</a> |                                     |             |              |             |
| GI_12597640-S | 87.7    | 88.7   | 78.9   | LRRC19   | <a href="#">NM_022901.1</a> | FLJ21302                            |             |              |             |
| GI_12597648-S | 266.6   | 292.4  | 287.1  | FLJ13195 | <a href="#">NM_022906.1</a> |                                     | electron    |              | electron    |
| GI_12597650-S | 101.5   | 101    | 100    | FLJ23053 | <a href="#">NM_022907.1</a> |                                     |             |              |             |

|               |        |        |        |          |                             |                         |              |             |             |
|---------------|--------|--------|--------|----------|-----------------------------|-------------------------|--------------|-------------|-------------|
| GI_12597652-S | 612.7  | 991.2  | 799.8  | FLJ12442 | <a href="#">NM_022908.1</a> |                         |              |             |             |
| GI_12597656-S | 138.4  | 155.4  | 137.6  | FLJ13110 | <a href="#">NM_022912.1</a> |                         |              |             |             |
| GI_12597658-S | 3390.5 | 2608   | 2620.8 | 24432    | <a href="#">NM_022914.1</a> |                         |              |             |             |
| GI_12621915-S | 90.7   | 96     | 95.9   | DEFA1    | <a href="#">NM_004084.2</a> | MRS;DEF1;HP-1;HNP-1     | antimicrob   | extracellul | chemotaxi   |
| GI_12621916-S | 121.9  | 121.5  | 121.2  | DEFA3    | <a href="#">NM_005217.2</a> | DEF3;HNP3;HP-3;HNP-3    | antimicrob   | extracellul | chemotaxi   |
| GI_12621917-S | 87.4   | 99.1   | 91.9   | DEFA6    | <a href="#">NM_001926.2</a> | DEF6;HD-6               | antimicrob   | extracellul | antimicrob  |
| GI_12621918-S | 127.4  | 407.8  | 131.1  | TAGLN    | <a href="#">NM_003186.2</a> | SM22;SMCC;WS3-10        | actin        |             | muscle      |
| GI_12669906-S | 680.3  | 408.3  | 669.4  | FACL2    | <a href="#">NM_021122.2</a> |                         |              |             |             |
| GI_12669908-I | 107.6  | 109.9  | 112.7  | ACSL4    | <a href="#">NM_022977.1</a> | ACS4;FACL4;LACS4;MRX63  | long-chain-  |             | learning    |
| GI_12669910-S | 184.9  | 212.4  | 228.3  | E2F1     | <a href="#">NM_005225.1</a> | RBP3;E2F-1;RBBP3        | transcripti  | transcripti | G1 phase    |
| GI_12669913-S | 1384   | 1269.6 | 666.6  | E2F3     | <a href="#">NM_001949.2</a> | E2F-3;KIAA0075          | protein      | transcripti | transcripti |
| GI_12669916-S | 1190.5 | 590.1  | 480.2  | E2F5     | <a href="#">NM_001951.2</a> | E2F-5                   | protein      | transcripti | regulation  |
| GI_12707557-I | 107.5  | 112.7  | 103.4  | GABRE    | <a href="#">NM_021990.1</a> |                         | GABA-A       | integral to | gamma-      |
| GI_12707559-A | 348.4  | 462.3  | 403.2  | GABRE    | <a href="#">NM_004961.2</a> |                         | GABA-A       | integral to | gamma-      |
| GI_12707560-A | 203.9  | 231.8  | 206.2  | PER2     | <a href="#">NM_003894.3</a> | FASPS;KIAA0347          |              |             | circadian   |
| GI_12707561-I | 494.2  | 380.5  | 175.7  | PER2     | <a href="#">NM_022817.1</a> | FASPS;KIAA0347          |              |             | circadian   |
| GI_12707563-S | 116.1  | 102.3  | 117.9  | DUSP2    | <a href="#">NM_004418.2</a> | PAC1;PAC-1              | protein      | nucleus     | inactivatio |
| GI_12707564-I | 234.2  | 307.8  | 258.9  | ECM1     | <a href="#">NM_004425.2</a> |                         |              | extracellul |             |
| GI_12707565-S | 5398   | 2426.6 | 1880.9 | DUSP5    | <a href="#">NM_004419.2</a> | HVH3                    | protein      | nucleus     | heat        |
| GI_12707569-S | 7229.4 | 7064.3 | 7372.7 | ECHS1    | <a href="#">NM_004092.2</a> | SCEH                    | enoyl-CoA    | mitochond   | fatty acid  |
| GI_12707571-A | 706.5  | 766.1  | 684.2  | ECM1     | <a href="#">NM_022664.1</a> |                         |              | extracellul |             |
| GI_12707573-S | 104.7  | 91.2   | 85.3   | OCM      | <a href="#">NM_006188.2</a> | OM;ONCM                 | calcium      | cellular_co | biological_ |
| GI_12707574-S | 107.4  | 111.6  | 107.8  | OXT      | <a href="#">NM_000915.2</a> | OT;OT-NPI               | hormone      | extracellul | parturition |
| GI_12707576-A | 113.2  | 127.6  | 125.5  | PRRX1    | <a href="#">NM_022716.1</a> | PMX1;PRX1;PHOX1         | transcripti  | nucleus     | regulation  |
| GI_12707578-I | 161.3  | 186.5  | 157.4  | PRRX1    | <a href="#">NM_006902.2</a> | PMX1;PRX1;PHOX1         | transcripti  | nucleus     | regulation  |
| GI_12707579-S | 97.7   | 121.2  | 123.9  | PHOX2B   | <a href="#">NM_003924.2</a> | PMX2B;NBPHOX            | transcripti  | nucleus     | neurogene   |
| GI_12711659-S | 142.6  | 153.8  | 163.6  | PRKWNK1  | <a href="#">NM_018979.1</a> | KDP;WNK1;PHA2C;KIAA0344 |              |             |             |
| GI_12711661-S | 187.1  | 204.6  | 194.8  | DO       | <a href="#">NM_021071.1</a> | ART4;DOK1               | NAD(P)-      | membran     | protein     |
| GI_12711669-S | 152.5  | 165.4  | 161.2  | FLJ12517 | <a href="#">NM_023007.1</a> |                         |              |             |             |
| GI_12711681-S | 258.5  | 265.8  | 290.4  | FLJ21870 | <a href="#">NM_023016.1</a> |                         |              |             |             |
| GI_12718865-S | 235.9  | 309.2  | 257.6  | DNAI2    | <a href="#">NM_023036.1</a> |                         | motor        | dynein      | microtubul  |
| GI_12719454-A | 142.8  | 153.8  | 137.4  | FOLR1    | <a href="#">NM_016731.2</a> | FBP;FOLR;MOv18;FR-alpha | folic acid   | peripheral  | receptor    |
| GI_12738830-S | 108.8  | 113.2  | 106.4  | LOC65121 | <a href="#">NM_023013.1</a> |                         |              |             |             |
| GI_12738833-S | 108.9  | 123.3  | 113.8  | LOC65122 | <a href="#">NM_023014.1</a> |                         |              |             |             |
| GI_12746589-I | 100.3  | 114.9  | 107.9  | CTBP2    | <a href="#">NM_022802.1</a> |                         | tumor        |             | viral       |
| GI_12751474-S | 521.9  | 880.9  | 710.3  | SLC39A6  | <a href="#">NM_012319.2</a> | LIV-1                   | heavy        | membran     | heavy       |
| GI_12751478-S | 119.2  | 126.7  | 106    | LOC65243 | <a href="#">NM_023070.1</a> |                         | nucleic      | membran     | proteolysis |
| GI_12751480-S | 409    | 429.4  | 320.8  | SPATS2   | <a href="#">NM_023071.1</a> | SCR59;SPATA10;FLJ13117  |              |             |             |
| GI_12751490-S | 510.7  | 419.9  | 456.1  | FLJ12439 | <a href="#">NM_023077.1</a> |                         |              |             |             |
| GI_12751492-S | 749.9  | 674.9  | 882.6  | FLJ13852 | <a href="#">NM_023078.1</a> |                         | pyrroline-5- |             | proline     |
| GI_12751496-S | 609.8  | 482.3  | 519.1  | FLJ20989 | <a href="#">NM_023080.1</a> |                         |              |             |             |
| GI_12957487-S | 131.9  | 144    | 150.8  | 13CDNA73 | <a href="#">NM_023037.1</a> | CG003                   |              |             |             |
| GI_12963480-S | 832    | 799.2  | 1028   | MGC5560  | <a href="#">NM_019054.1</a> |                         |              |             |             |
| GI_12965168-S | 139.2  | 160.1  | 154.7  | ATP1B4   | <a href="#">NM_012069.2</a> |                         | monovale     | integral to | small       |

|               |        |        |        |           |                             |                                    |              |             |             |
|---------------|--------|--------|--------|-----------|-----------------------------|------------------------------------|--------------|-------------|-------------|
| GI_12965169-S | 299.8  | 371    | 362.5  | SPEC1     | <a href="#">NM_020239.2</a> | SCIP1                              | GTPase       | plasma      | regulation  |
| GI_12965171-S | 128    | 141.5  | 128.6  | TAS2R9    | <a href="#">NM_023917.1</a> | T2R9;TRB6                          | taste        | integral to | G-protein   |
| GI_12965173-S | 106.6  | 105.3  | 107.4  | TAS2R8    | <a href="#">NM_023918.1</a> | T2R8;TRB5                          | taste        | integral to | G-protein   |
| GI_12965175-S | 144.7  | 160.6  | 142.6  | TAS2R7    | <a href="#">NM_023919.1</a> | T2R7;TRB4                          | taste        | integral to | G-protein   |
| GI_12965177-S | 93.6   | 81.5   | 86.2   | TAS2R13   | <a href="#">NM_023920.1</a> | TRB3;T2R13                         | taste        | integral to | biological_ |
| GI_12965179-S | 89.1   | 92.5   | 96.2   | TAS2R10   | <a href="#">NM_023921.1</a> | TRB2;T2R10                         | taste        | integral to | biological_ |
| GI_12965181-S | 200.3  | 216.4  | 202.5  | TAS2R14   | <a href="#">NM_023922.1</a> | TRB1;T2R14                         | taste        | integral to | biological_ |
| GI_12965190-S | 929    | 1029.2 | 879    | BRD9      | <a href="#">NM_023924.1</a> | FLJ13441                           |              |             |             |
| GI_12965196-S | 305    | 201.6  | 186    | NS3TP2    | <a href="#">NM_023927.1</a> | FLJ21313                           |              |             |             |
| GI_13027379-S | 337.4  | 407.1  | 537.8  | ALS2CR3   | <a href="#">NM_015049.1</a> | GRIF1;OIP98;CALC-C;GRIF-1;KIAA0549 | intracellula | cytoplasm   | neurotran   |
| GI_13027599-S | 958.5  | 944.5  | 1049.4 | MGC2494   | <a href="#">NM_023933.1</a> |                                    |              |             |             |
| GI_13027601-S | 342.2  | 347.3  | 225.5  | C20orf116 | <a href="#">NM_023935.1</a> | MGC2592;dJ1187M17.3                | DNA          | nucleus     | regulation  |
| GI_13027603-S | 1208   | 1299.7 | 1360.3 | MRPS34    | <a href="#">NM_023936.1</a> | MGC2616;MRP-S12;MRP-S34            | structural   | mitochond   |             |
| GI_13027615-S | 113.1  | 117.4  | 108.8  | MGC3036   | <a href="#">NM_023942.1</a> | FLJ22216                           |              |             |             |
| GI_13027629-S | 201.3  | 235.4  | 236.8  | DGCR14    | <a href="#">NM_022719.1</a> | ES2;DGSI;DGS-I;Ese2el              | molecular    | nucleus     | neurogene   |
| GI_13027631-S | 207.4  | 258.4  | 224    | SERF1B    | <a href="#">NM_022978.1</a> | FAM2B;H4F5C                        |              |             |             |
| GI_13027633-S | 187.5  | 252.7  | 176.9  | MDF1      | <a href="#">NM_005586.2</a> | I-MF                               | transcripti  | cytoplasm   | embryoge    |
| GI_13027635-S | 609.4  | 396.3  | 228.5  | EDG1      | <a href="#">NM_001400.2</a> | ECGF1;CHEDG1;D1S3362               | G-protein    | integral to | G-protein   |
| GI_13027637-S | 2643.2 | 2828.8 | 2484.5 | UGP2      | <a href="#">NM_006759.2</a> | UDPG;UGPP2;UDPGP2;pHC379           | UTP-         |             | UDP-        |
| GI_13027639-S | 131.5  | 156.3  | 133.9  | AASS      | <a href="#">NM_005763.2</a> | LKRSDH;LORSDH;LKR/SDH              | peroxidase   |             | electron    |
| GI_13027654-A | 1439.8 | 1616   | 1276.6 | SNURF     | <a href="#">NM_022804.1</a> |                                    | molecular    | nucleus     | biological_ |
| GI_13027789-I | 106.7  | 91.7   | 94.4   | MMP19     | <a href="#">NM_022790.1</a> | MMP18;RASI-1                       |              |             |             |
| GI_13027793-A | 148.8  | 214.2  | 164.9  | MMP19     | <a href="#">NM_022792.1</a> | MMP18;RASI-1                       |              |             |             |
| GI_13027795-S | 169.5  | 201.3  | 214.1  | MMP11     | <a href="#">NM_005940.2</a> | ST3;SL-3;STMY3                     | stromelysi   | extracellul | proteolysis |
| GI_13027796-S | 106    | 110.8  | 91.8   | MMP13     | <a href="#">NM_002427.2</a> | CLG3                               | collagenase  | extracellul | proteolysis |
| GI_13027797-S | 8521   | 7070.6 | 191.1  | MMP14     | <a href="#">NM_004995.2</a> | MMP-X1;MTMMP1;MT1-MMP              | zinc ion     | extracellul | proteolysis |
| GI_13027798-S | 200.8  | 303.4  | 186.4  | MMP1      | <a href="#">NM_002421.2</a> | CLG;CLGN                           | collagenase  | extracellul | proteolysis |
| GI_13027799-A | 175.4  | 197    | 180.5  | MMP16     | <a href="#">NM_022564.1</a> | MMP-X2;MT-MMP2;MT-MMP3;MT3-MMP     | enzyme       | extracellul | proteolysis |
| GI_13027799-I | 121.2  | 125.9  | 128.5  | MMP16     | <a href="#">NM_022564.1</a> | MMP-X2;MT-MMP2;MT-MMP3;MT3-MMP     | enzyme       | extracellul | proteolysis |
| GI_13027801-I | 122.6  | 155.6  | 153.4  | MMP16     | <a href="#">NM_005941.2</a> | MMP-X2;MT-MMP2;MT-MMP3;MT3-MMP     | enzyme       | extracellul | proteolysis |
| GI_13027803-S | 401.1  | 155.9  | 128.3  | MMP3      | <a href="#">NM_002422.2</a> | SL-1;STMY;STR1;STMY1;TRANSIN       | stromelysi   | extracellul | proteolysis |
| GI_13027804-S | 115.8  | 127.3  | 103.4  | MMP7      | <a href="#">NM_002423.2</a> | MMP-7;MPSL1;PUMP-1                 | metalloen    | extracellul | proteolysis |
| GI_13027806-S | 170.2  | 174.4  | 191.2  | MMP24     | <a href="#">NM_006690.2</a> | MMP25;MT5-MMP                      | enzyme       | extracellul | proteolysis |
| GI_13027808-A | 178.9  | 158.3  | 129    | MMP25     | <a href="#">NM_022718.1</a> | MMP20;MT6-MMP;LEUKOLYSIN           | zinc ion     | membran     | proteolysis |
| GI_13027810-S | 113.1  | 130.4  | 128.7  | MMP26     | <a href="#">NM_021801.2</a> |                                    | zinc ion     | extracellul | collagen    |
| GI_13112046-I | 117.8  | 134.7  | 115.6  | FGFR3     | <a href="#">NM_000142.2</a> | ACH;CEK2;JTK4;HSFGFR3EX            | fibroblast   | integral to | JAK-STAT    |
| GI_13112047-A | 145.1  | 216.5  | 170.1  | FGFR3     | <a href="#">NM_022965.1</a> | ACH;CEK2;JTK4;HSFGFR3EX            | fibroblast   | integral to | JAK-STAT    |
| GI_13112049-A | 178.2  | 161.5  | 93.5   | FGFR4     | <a href="#">NM_022963.1</a> | TKF;JTK2                           | fibroblast   | integral to | FGF         |
| GI_13112049-I | 96.8   | 103.9  | 91.8   | FGFR4     | <a href="#">NM_022963.1</a> | TKF;JTK2                           | fibroblast   | integral to | FGF         |
| GI_13112051-I | 143.7  | 149    | 138.8  | FGFR4     | <a href="#">NM_002011.2</a> | TKF;JTK2                           | fibroblast   | integral to | FGF         |
| GI_13112053-S | 892.4  | 1118.4 | 1296.7 | FGFRL1    | <a href="#">NM_021923.2</a> | FGFR5                              |              |             |             |
| GI_13112055-S | 182    | 208    | 201.9  | AVPR1B    | <a href="#">NM_000707.2</a> | AVPR3                              | vasopress    | endosome    | cytosolic   |
| GI_13123771-S | 1717   | 1772.9 | 1658.2 | CNOT10    | <a href="#">NM_015442.1</a> | FLJ12890;FLJ13165;DKFZP434K115     |              |             |             |
| GI_13123773-S | 350.2  | 299.9  | 306.4  | POT1      | <a href="#">NM_015450.1</a> | DKFZP586D211                       |              |             |             |



|               |         |        |        |            |                             |                                    |             |             |              |
|---------------|---------|--------|--------|------------|-----------------------------|------------------------------------|-------------|-------------|--------------|
| GI_13123777-S | 133.2   | 169.3  | 161    | BRUNOL4    | <a href="#">NM_020180.1</a> | CELF4;BRUNOL-4                     | nucleic     |             |              |
| GI_13124755-S | 118     | 123.2  | 106.7  | KIAA0582   | <a href="#">NM_015147.1</a> |                                    |             |             |              |
| GI_13124760-I | 88.3    | 90.1   | 84.7   | HOM-TES-10 | <a href="#">NM_015438.1</a> | FLJ20703;DKFZP586I2223             |             |             |              |
| GI_13124762-S | 96.2    | 88.7   | 87.5   | DKFZP566F0 | <a href="#">NM_015653.1</a> |                                    |             |             |              |
| GI_13124772-S | 751.6   | 590.6  | 698.5  | LOC51236   | <a href="#">NM_016458.2</a> |                                    |             |             |              |
| GI_13124878-A | 526.9   | 668.4  | 639.5  | MYH11      | <a href="#">NM_002474.1</a> | SMHC;SMMHC                         | actin       | muscle      | striated     |
| GI_13124880-A | 3679.5  | 3265.7 | 4013.5 | CBFB       | <a href="#">NM_022845.1</a> | PEBP2B                             | RNA         |             | oncogene     |
| GI_13124884-S | 100.2   | 112.2  | 114.8  | DEFB1      | <a href="#">NM_005218.2</a> | BD1;HBD1;HBD-1;DEFB-1;DEFB101      | antimicrob  | extracellul | chemotaxi    |
| GI_13124885-S | 96.6    | 105.4  | 98.9   | DEFB4      | <a href="#">NM_004942.2</a> | SAP1;DEFB2;HBD-2;DEFB-2;DEFB102    | antimicrob  | extracellul | response     |
| GI_13124886-S | 128.5   | 118.9  | 120.7  | DEFB103    | <a href="#">NM_018661.2</a> | HBD3;HBP3;DEFB3;HBD-3;HBP-3;DEFB-3 | antimicrob  | extracellul | xenobiotic   |
| GI_13124887-S | 103     | 96.7   | 98.6   | EGFL6      | <a href="#">NM_015507.2</a> | W80;MAEG;DKFZP564P2063             | integrin    | extracellul | cell cycle   |
| GI_13124889-S | 3284.5  | 2465.9 | 2516.7 | C12orf8    | <a href="#">NM_006817.2</a> | ERP28;ERP29;ERp31;PDI-DB           | protein     | endoplas    | intracellula |
| GI_13124890-S | 395.7   | 657.5  | 458.1  | GALNT1     | <a href="#">NM_020474.2</a> | GALNAC-T1                          | polypeptid  | Golgi       | O-linked     |
| GI_13124893-S | 723.4   | 839.4  | 627.2  | GALNT6     | <a href="#">NM_007210.2</a> | GalNAcT6;GALNAC-T6                 | polypeptid  |             | O-linked     |
| GI_13128859-S | 3713.2  | 4997.2 | 5188.9 | HDAC1      | <a href="#">NM_004964.2</a> | HD1;RPD3;RPD3L1                    | histone     | nucleus     | regulation   |
| GI_13128861-S | 1131.2  | 1137.9 | 1114.8 | HDAC3      | <a href="#">NM_003883.2</a> | HD3;RPD3;RPD3-2                    | histone     | nucleus     | regulation   |
| GI_13128863-S | 178.3   | 213.4  | 234.3  | HDAC6      | <a href="#">NM_006044.2</a> | HD6;JM21;KIAA0901                  | zinc ion    | cytoplasm   | histone      |
| GI_13128865-S | 127.3   | 133.6  | 149.3  | HEXA       | <a href="#">NM_000520.2</a> | TSD                                | beta-N-     | lysosome    | glycosphin   |
| GI_13128866-S | 10220.4 | 8189.5 | 6226.8 | HEXB       | <a href="#">NM_000521.2</a> |                                    | beta-N-     | lysosome    | glycosphin   |
| GI_13128949-S | 89.8    | 101.1  | 100.1  | IFNA1      | <a href="#">NM_024013.1</a> | IFL;IFN;IFNA@;IFN-ALPHA            |             |             |              |
| GI_13128959-S | 105.2   | 119.9  | 108.2  | GJB3       | <a href="#">NM_024009.1</a> | CX31;DFNA2                         | connexon    | connexon    | hearing      |
| GI_13128965-S | 102.2   | 124.2  | 116.1  | IFNA13     | <a href="#">NM_006900.2</a> |                                    | interferon- | extracellul | defense      |
| GI_13128967-S | 151     | 163.1  | 147.9  | MGC1136    | <a href="#">NM_024025.1</a> | MGC2627                            | protein     | nucleus     | protein      |
| GI_13128985-S | 108.4   | 118.7  | 114.1  | MGC3113    | <a href="#">NM_024035.1</a> | FLJ22850                           |             |             |              |
| GI_13128989-S | 232.5   | 217.3  | 241.9  | MGC2603    | <a href="#">NM_024037.1</a> | FLJ14264                           |             |             |              |
| GI_13128993-S | 1075.6  | 1008.1 | 837.3  | MIS12      | <a href="#">NM_024039.1</a> | hMis12;MGC2488                     |             |             |              |
| GI_13128995-S | 1856    | 1902.1 | 1626.2 | CUEDC2     | <a href="#">NM_024040.1</a> | MGC2491;C10orf66;bA18I14.5         |             |             |              |
| GI_13128997-S | 511.1   | 440.7  | 455.6  | SCNM1      | <a href="#">NM_024041.1</a> | MGC3180                            |             |             |              |
| GI_13129005-S | 2956.2  | 2400.9 | 1603.9 | DDX50      | <a href="#">NM_024045.1</a> | GU2;GUB;MGC3199;RH-II/GuB          |             |             |              |
| GI_13129013-S | 109.8   | 150.4  | 137.2  | MGC5566    | <a href="#">NM_024049.1</a> |                                    |             |             |              |
| GI_13129023-S | 554.6   | 589.8  | 670.4  | C7orf25    | <a href="#">NM_024054.1</a> | MGC2821;FLJ21167                   |             |             |              |
| GI_13129029-S | 92.1    | 96.8   | 91.9   | MGC5590    | <a href="#">NM_024058.1</a> |                                    |             |             |              |
| GI_13129033-S | 216.4   | 213.9  | 167.8  | MGC5395    | <a href="#">NM_024060.1</a> |                                    | protein     |             | intracellula |
| GI_13129039-S | 589.6   | 546.4  | 531.8  | SPATA5L1   | <a href="#">NM_024063.1</a> | MGC5347;FLJ12286                   | nucleotide  |             |              |
| GI_13129059-S | 104.7   | 95.6   | 96.7   | MGC3169    | <a href="#">NM_024074.1</a> |                                    |             |             |              |
| GI_13129061-S | 834.3   | 885    | 1033.8 | LENG5      | <a href="#">NM_024075.1</a> |                                    |             |             |              |
| GI_13129063-S | 304.8   | 264.8  | 223.5  | KCTD15     | <a href="#">NM_024076.1</a> | MGC2628;MGC25497                   | voltage-    | membran     | potassium    |
| GI_13129067-S | 387.6   | 321.9  | 391.1  | MGC3162    | <a href="#">NM_024078.1</a> |                                    |             |             |              |
| GI_13129085-S | 239.1   | 325.6  | 316    | KDEL1      | <a href="#">NM_024089.1</a> | EP58;KDEL1;MGC5302                 |             |             |              |
| GI_13129087-S | 519.8   | 757.6  | 531.5  | ELOVL6     | <a href="#">NM_024090.1</a> | FAE;LCE;MGC5487;FLJ23378           |             | integral to |              |
| GI_13129091-S | 1799.5  | 1880.9 | 2494.1 | MGC5508    | <a href="#">NM_024092.1</a> |                                    |             |             |              |
| GI_13129093-S | 664.8   | 680.2  | 536.7  | MGC5509    | <a href="#">NM_024093.1</a> |                                    |             |             |              |
| GI_13129095-S | 441.9   | 382.7  | 476.7  | MGC5528    | <a href="#">NM_024094.1</a> | DCC1                               |             |             |              |
| GI_13129099-S | 1089.2  | 970.6  | 1023.3 | XTP3TPA    | <a href="#">NM_024096.1</a> | CDA03;RS21C6;MGC5627               |             |             |              |

|               |        |        |        |          |                             |                                      |             |                          |
|---------------|--------|--------|--------|----------|-----------------------------|--------------------------------------|-------------|--------------------------|
| GI_13129101-S | 620.7  | 733.8  | 614.6  | MGC955   | <a href="#">NM_024097.1</a> |                                      |             |                          |
| GI_13129103-S | 396.7  | 403.3  | 325.8  | MGC2574  | <a href="#">NM_024098.1</a> | FLJ22321                             | DNA         | nucleus regulation       |
| GI_13129105-S | 1175.3 | 1390.6 | 1239.8 | MGC2477  | <a href="#">NM_024099.1</a> |                                      |             |                          |
| GI_13129115-S | 256.2  | 282.3  | 250.3  | ZNF426   | <a href="#">NM_024106.1</a> | MGC2663                              | nucleic     | intracellula regulation  |
| GI_13129117-A | 1923.9 | 2017.4 | 2045.7 | MGC3123  | <a href="#">NM_024107.1</a> |                                      |             |                          |
| GI_13129119-S | 486.2  | 657.4  | 429.6  | MGC2650  | <a href="#">NM_024108.1</a> |                                      |             |                          |
| GI_13129121-S | 742.3  | 955.3  | 558.4  | MGC2654  | <a href="#">NM_024109.1</a> | FLJ12433                             |             |                          |
| GI_13129133-S | 91.5   | 113.1  | 91.5   | MGC4309  | <a href="#">NM_024115.1</a> |                                      |             |                          |
| GI_13129135-S | 475.7  | 507.3  | 670.4  | MGC5306  | <a href="#">NM_024116.1</a> |                                      |             |                          |
| GI_13129141-S | 282.3  | 407.4  | 337.3  | LGP2     | <a href="#">NM_024119.1</a> | FLJ11354                             | nucleic     |                          |
| GI_13129143-S | 291.6  | 367.3  | 314    | C20orf7  | <a href="#">NM_024120.1</a> | FLJ22324;dJ842G6.1                   |             |                          |
| GI_13162281-S | 268.2  | 235.2  | 312.1  | STS      | <a href="#">NM_000351.2</a> | ES;ASC;ARSC;SSDD;ARSC1               | steryl-     | endosome steroid         |
| GI_13162284-S | 478.7  | 528    | 592.8  | MGC5242  | <a href="#">NM_024033.1</a> | FLJ22450                             |             |                          |
| GI_13184045-S | 166.9  | 196.2  | 161.7  | CYP4F12  | <a href="#">NM_023944.1</a> | F22329_1                             | monooxyg    | membran electron         |
| GI_13184051-S | 101.7  | 107    | 103.3  | BTN2A3   | <a href="#">NM_024018.1</a> |                                      |             |                          |
| GI_13186246-A | 121.6  | 163.7  | 120.9  | FGFR1    | <a href="#">NM_023110.1</a> | H2;H3;H4;H5;CEK;FLG;FLT2;KAL2;BFGFR; | fibroblast  | integral to fibroblast   |
| GI_13186246-I | 161.5  | 186.9  | 163.4  | FGFR1    | <a href="#">NM_023110.1</a> | H2;H3;H4;H5;CEK;FLG;FLT2;KAL2;BFGFR; | fibroblast  | integral to fibroblast   |
| GI_13186256-I | 111.7  | 97     | 89     | FGFR2    | <a href="#">NM_022971.1</a> | BEK;JWS;CEK3;CFD1;ECT1;KGFR;TK14;TK  |             |                          |
| GI_13186266-A | 114.2  | 98.6   | 92.4   | FGFR2    | <a href="#">NM_022976.1</a> | BEK;JWS;CEK3;CFD1;ECT1;KGFR;TK14;TK  |             |                          |
| GI_13186299-S | 121.6  | 111.3  | 116.6  | U2AF1L1  | <a href="#">NM_005083.2</a> | U2AF1P;U2AFBPL;U2AF1RS1;U2AF1-RS1    | RNA         | nucleus biological_      |
| GI_13186300-A | 119.8  | 123.9  | 120.2  | CAPN10   | <a href="#">NM_021251.2</a> |                                      | calpain     | cytoplasm proteolysis    |
| GI_13186309-I | 214.4  | 269.4  | 256.6  | CAPN10   | <a href="#">NM_023087.1</a> |                                      | calpain     | cytoplasm proteolysis    |
| GI_13186313-I | 102.6  | 100.8  | 82.6   | CAPN10   | <a href="#">NM_023089.1</a> |                                      | calpain     | cytoplasm proteolysis    |
| GI_13186315-S | 177.4  | 188    | 162.6  | CAPN6    | <a href="#">NM_014289.2</a> | CANPX;CAPNX;CalpM;DJ914P14.1         | calpain     | intracellula proteolysis |
| GI_13186317-I | 99.5   | 107.1  | 99.4   | METTL1   | <a href="#">NM_023032.1</a> | C12orf1;YDL201w                      | methyltran  | membran transport        |
| GI_13186319-A | 965.7  | 862.6  | 1002.8 | METTL1   | <a href="#">NM_023033.1</a> | C12orf1;YDL201w                      | methyltran  | membran transport        |
| GI_13194196-S | 720.5  | 796.5  | 784.1  | KIF13B   | <a href="#">NM_015254.1</a> | GAKIN;KIAA0639                       | ATP         | kinesin microtubul       |
| GI_13194198-S | 106.1  | 116.5  | 94.3   | TM6SF1   | <a href="#">NM_023003.1</a> |                                      | molecular   | integral to biological_  |
| GI_13236491-S | 150.6  | 180.3  | 176.3  | LY6G6E   | <a href="#">NM_024123.1</a> | G6e;C6orf22                          |             |                          |
| GI_13236496-S | 84.4   | 82.8   | 82.1   | HTR5A    | <a href="#">NM_024012.1</a> |                                      | serotonin   | integral to G-protein    |
| GI_13236498-S | 83.7   | 89.2   | 82     | LOC55871 | <a href="#">NM_018491.2</a> |                                      |             |                          |
| GI_13236513-S | 174.2  | 198.8  | 172.9  | MGC4614  | <a href="#">NM_024294.1</a> |                                      |             |                          |
| GI_13236519-S | 3850.6 | 4116   | 4159.8 | MGC2941  | <a href="#">NM_024297.1</a> | FLJ22884                             | DNA         | regulation               |
| GI_13236531-S | 142.4  | 173.3  | 132.7  | ZNF495   | <a href="#">NM_024303.1</a> | MGC4161                              | transcripti | nucleus regulation       |
| GI_13236539-S | 175.1  | 153.5  | 140.3  | MGC4171  | <a href="#">NM_024307.1</a> | FLJ22603                             | glyceroph   | glycerol                 |
| GI_13236552-S | 390.3  | 329.4  | 402.1  | MGC3731  | <a href="#">NM_024313.1</a> |                                      |             |                          |
| GI_13236564-S | 132.1  | 150.3  | 149.8  | MGC11266 | <a href="#">NM_024322.1</a> |                                      |             |                          |
| GI_13236574-S | 413    | 532.6  | 491.1  | ZNF576   | <a href="#">NM_024327.1</a> | MGC2508;FLJ22700                     |             |                          |
| GI_13236578-S | 316.2  | 250.1  | 172.4  | SLC27A3  | <a href="#">NM_024330.1</a> | FATP3;MGC4365                        |             |                          |
| GI_13236584-S | 875.6  | 875.9  | 859    | FSD1     | <a href="#">NM_024333.1</a> | MIR1;MGC3213                         |             | intracellula             |
| GI_13236586-S | 2380.6 | 2662   | 2100.8 | MGC3222  | <a href="#">NM_024334.1</a> | DKFZp586G1919                        |             |                          |
| GI_13236592-S | 154.2  | 168.3  | 154.5  | ZNF557   | <a href="#">NM_024341.1</a> | MGC4054                              | nucleic     | nucleus regulation       |
| GI_13236596-S | 813.9  | 752.4  | 533.3  | MGC10765 | <a href="#">NM_024345.1</a> | FLJ23201                             |             |                          |
| GI_13249345-S | 86.8   | 91.9   | 88.3   | NPPC     | <a href="#">NM_024409.1</a> | CNP                                  | hormone     | extracellul regulation   |

|               |        |        |        |          |                             |                                      |              |             |             |
|---------------|--------|--------|--------|----------|-----------------------------|--------------------------------------|--------------|-------------|-------------|
| GI_13259496-I | 105.2  | 122.3  | 112.2  | ARID4A   | <a href="#">NM_002892.2</a> | RBP1;RBBP1;RBP-1                     | protein      | chromatin   | transcripti |
| GI_13259500-A | 182.3  | 194.4  | 206.9  | ARID4A   | <a href="#">NM_023001.1</a> | RBP1;RBBP1;RBP-1                     | protein      | chromatin   | transcripti |
| GI_13259502-S | 123    | 148.6  | 138.1  | NR0B2    | <a href="#">NM_021969.1</a> | SHP;SHP1                             | transcripti  | nucleus     | cholestero  |
| GI_13259504-S | 1939.2 | 1599.8 | 2022.3 | RBBP7    | <a href="#">NM_002893.2</a> | RbAp46                               |              | nucleus     | developm    |
| GI_13259505-S | 225.6  | 137.6  | 357    | ESM1     | <a href="#">NM_007036.2</a> |                                      | insulin-like | extracellul | biological_ |
| GI_13259507-A | 488.4  | 547.2  | 597.2  | DCTN1    | <a href="#">NM_023019.1</a> | P135;DP-150;DAP-150                  | motor        | kinesin     | mitosis     |
| GI_13259509-I | 111.9  | 114.2  | 110.3  | DCTN1    | <a href="#">NM_004082.2</a> | P135;DP-150;DAP-150                  | motor        | kinesin     | mitosis     |
| GI_13259511-A | 829.4  | 681.4  | 633.9  | SMN1     | <a href="#">NM_022874.1</a> | SMN;SMA1;SMA2;SMA3;SMA4;SMNT;BCD5    |              |             |             |
| GI_13259517-I | 103.8  | 104.3  | 94.7   | ADAM12   | <a href="#">NM_003474.2</a> | MCMP;MLTN;MLTNA;MCMPIItna            | metallope    | integral to | myoblast    |
| GI_13259519-S | 608.5  | 593.5  | 554    | HDAC4    | <a href="#">NM_006037.2</a> | HD4;HDACA;HA6116;HDAC-A;KIAA0288     | transcripti  | histone     | neurogene   |
| GI_13259521-I | 107.6  | 118.5  | 121.8  | HDAC7A   | <a href="#">NM_015401.1</a> | HDAC7;DKFZP586J0917                  |              |             |             |
| GI_13259523-A | 109.4  | 115.4  | 108.9  | HDAC7A   | <a href="#">NM_016596.2</a> | HDAC7;DKFZP586J0917                  |              |             |             |
| GI_13259530-A | 126.6  | 121.1  | 110.9  | SMN2     | <a href="#">NM_022877.1</a> | SMNC;BCD541;C-BCD541                 |              |             |             |
| GI_13259532-S | 133.9  | 147.3  | 130.5  | AVP      | <a href="#">NM_000490.2</a> | VP;ADH;ARVP;AVRP;AVP-NPII            | neuropepti   | soluble     | water       |
| GI_13259536-S | 90.3   | 92.7   | 101.4  | IBSP     | <a href="#">NM_004967.2</a> | BSP;BNSP;SP-II;BSP-II                | cell         | extracellul | ossificatio |
| GI_13259537-S | 491.9  | 466.7  | 367.3  | KAI1     | <a href="#">NM_002231.2</a> | R2;4F9;C33;IA4;ST6;CD82;GR15;SAR2    | tumor        | integral to |             |
| GI_13259538-S | 582.3  | 392.1  | 370.7  | MSRA     | <a href="#">NM_012331.2</a> |                                      | protein-     |             | methionin   |
| GI_13259540-S | 90     | 100.6  | 90.8   | UCP2     | <a href="#">NM_003355.2</a> | UCPH;SLC25A8                         | uncouplin    | mitochond   | proton      |
| GI_13259542-A | 1006.9 | 1145.3 | 1145.6 | SLC25A14 | <a href="#">NM_022810.1</a> | UCP5;BMCP1                           | carrier      | mitochond   | aerobic     |
| GI_13259544-I | 97.6   | 99.7   | 99.6   | UCP3     | <a href="#">NM_003356.2</a> | SLC25A9                              | uncouplin    | mitochond   | proton      |
| GI_13259545-A | 100.9  | 102.7  | 110.6  | UCP3     | <a href="#">NM_022803.1</a> | SLC25A9                              | uncouplin    | mitochond   | proton      |
| GI_13259545-I | 106.1  | 86.7   | 88.9   | UCP3     | <a href="#">NM_022803.1</a> | SLC25A9                              | uncouplin    | mitochond   | proton      |
| GI_13259551-A | 637.3  | 1599.5 | 956.5  | G1P3     | <a href="#">NM_002038.2</a> | 6-16;IFI616                          |              | integral to | immune      |
| GI_13324673-S | 102.8  | 116.1  | 84     | TSPY     | <a href="#">NM_003308.2</a> | DYS14;pJA923                         |              |             | sex         |
| GI_13324676-S | 490.7  | 1225.7 | 550    | ENPP1    | <a href="#">NM_006208.1</a> | M6S1;NPP1;NPPS;PC-1;PCA1;PDNP1       | nucleotide   | membran     | response    |
| GI_13324681-S | 371.3  | 421.1  | 420.6  | FAM3A    | <a href="#">NM_021806.1</a> | 2-19;2.19;XAP-7;DXS560S              |              |             |             |
| GI_13324689-S | 115.5  | 142.2  | 118    | ILT8     | <a href="#">NM_024318.1</a> | LILRB6                               |              |             |             |
| GI_13325053-S | 199.6  | 297.8  | 300.3  | CYP1A1   | <a href="#">NM_000499.2</a> | AHH;AHRR;CP11;CYP1;P1-450;P450-      | cytochrom    | membran     | oncogene    |
| GI_13325054-S | 81.9   | 92.6   | 73.8   | SLC27A6  | <a href="#">NM_014031.1</a> | FATP6;VLCS-H1                        | long-chain-  |             | very-long-  |
| GI_13325056-S | 377.8  | 282.8  | 320.6  | SLC27A5  | <a href="#">NM_012254.1</a> | FATP5;FACVL3;VLACSR;VLCSH2;VLCS-     | long-chain-  | endoplas    | very-long-  |
| GI_13325058-S | 3535.7 | 3912.2 | 4537.6 | ACTR1A   | <a href="#">NM_005736.2</a> | ARP1                                 | motor        | microtubul  | vesicle-    |
| GI_13325059-S | 100.4  | 99.3   | 93.8   | CYP1B1   | <a href="#">NM_000104.2</a> | CP1B;GLC3A                           | cytochrom    | membran     | eye         |
| GI_13325060-S | 835.6  | 984    | 983.8  | ACTR1B   | <a href="#">NM_005735.2</a> | ARP1B;CTR2                           | motor        | microtubul  |             |
| GI_13325061-S | 674.3  | 830.1  | 695    | CYP1A2   | <a href="#">NM_000761.2</a> | CP12;P3-450;P450(PA)                 | cytochrom    | microsom    | electron    |
| GI_13325062-S | 163.1  | 236.7  | 156.6  | JAK2     | <a href="#">NM_004972.2</a> |                                      | protein-     | cytoskelet  | JAK-STAT    |
| GI_13325063-S | 307.7  | 405.6  | 429.2  | CELSR2   | <a href="#">NM_001408.1</a> | EGFL2;MEGF3;CDHF10;KIAA0279;Flamingo | G-protein    | integral to | neuropepti  |
| GI_13325065-S | 1086.5 | 732.3  | 938.9  | CELSR3   | <a href="#">NM_001407.1</a> | FMI1;EGFL1;HFMI1;MEGF2;CDHF11        | G-protein    | integral to | neuropepti  |
| GI_13325067-I | 88.4   | 96.2   | 87.2   | MTRR     | <a href="#">NM_024010.1</a> | MSR                                  | electron     | mitochond   | amino       |
| GI_13325073-S | 131.8  | 152.4  | 135.7  | MYBPC3   | <a href="#">NM_000256.2</a> | FHC;CMH4;MYBP-C                      | structural   | striated    | regulation  |
| GI_13325074-S | 5529.5 | 6292.2 | 5717.6 | QSCN6    | <a href="#">NM_002826.2</a> | Q6                                   |              |             | negative    |
| GI_13346499-S | 259.4  | 224    | 260.4  | BITE     | <a href="#">NM_024491.1</a> |                                      |              |             |             |
| GI_13346505-S | 90.7   | 106.1  | 97     | SFTPA2   | <a href="#">NM_006926.1</a> | SP-A2;SPAIL;COLEC5                   | lectin [goid | extracellul | respiratory |
| GI_13374556-S | 137.2  | 132.3  | 136.6  | ZNF117   | <a href="#">NM_024498.1</a> | HPF9                                 | zinc ion     | nucleus     | regulation  |
| GI_13375617-S | 883    | 1395.6 | 1030.7 | DHCR24   | <a href="#">NM_014762.1</a> | KIAA0018;SELADIN1                    | oxidoredu    | Golgi       | electron    |

|               |        |        |        |           |                             |                                |             |              |             |
|---------------|--------|--------|--------|-----------|-----------------------------|--------------------------------|-------------|--------------|-------------|
| GI_13375631-S | 77.3   | 80.5   | 80.2   | HOXD1     | <a href="#">NM_024501.1</a> | HOX4;HOX4G                     | transcripti | nucleus      | regulation  |
| GI_13375633-S | 179.7  | 216.2  | 196.4  | HIVEP3    | <a href="#">NM_024503.1</a> | KRC;KBP1;KIAA1555              | transcripti | nucleus      | regulation  |
| GI_13375635-S | 99.4   | 79.8   | 89.1   | PRDM14    | <a href="#">NM_024504.1</a> | PFM11;MGC59730                 | DNA         | nucleus      | regulation  |
| GI_13375643-S | 88.9   | 99.2   | 79.1   | ZBED2     | <a href="#">NM_024508.1</a> | MGC10796                       | transporte  | membran      | transport   |
| GI_13375645-S | 673.6  | 687.1  | 792.6  | LRFN3     | <a href="#">NM_024509.1</a> | MGC2656                        | DNA         | nucleus      | regulation  |
| GI_13375655-S | 84     | 98.1   | 98.5   | ULBP3     | <a href="#">NM_024518.1</a> | RAET1N                         | MHC         | membran      | immune      |
| GI_13375659-S | 1222.3 | 1191   | 1239.8 | FLJ22555  | <a href="#">NM_024520.1</a> |                                |             |              |             |
| GI_13375663-S | 131    | 134.9  | 125    | FLJ12650  | <a href="#">NM_024522.1</a> |                                |             |              |             |
| GI_13375675-S | 605.3  | 559.5  | 528.3  | NKAP      | <a href="#">NM_024528.1</a> | FLJ22626                       | DNA         | nucleus      | regulation  |
| GI_13375679-S | 425.8  | 526.3  | 468.4  | FLJ23306  | <a href="#">NM_024530.1</a> |                                |             |              |             |
| GI_13375689-S | 382.6  | 452.3  | 397.1  | FLJ22021  | <a href="#">NM_024535.1</a> |                                | serine-     |              | proteolysis |
| GI_13375694-S | 2466.5 | 1685.2 | 2592.3 | FLJ12118  | <a href="#">NM_024537.1</a> |                                | ATP         |              | cysteiny-   |
| GI_13375700-S | 310.9  | 300.7  | 391.5  | C10orf76  | <a href="#">NM_024541.1</a> | FLJ13114                       |             |              |             |
| GI_13375704-S | 389.2  | 485.3  | 430.1  | FLJ12875  | <a href="#">NM_024544.1</a> |                                |             |              |             |
| GI_13375716-S | 94.8   | 101    | 88.2   | LASS4     | <a href="#">NM_024552.1</a> | Trh1;FLJ12089                  | transcripti | nucleus      | regulation  |
| GI_13375720-S | 229.2  | 247.5  | 235.2  | FLJ21103  | <a href="#">NM_024556.1</a> |                                |             |              |             |
| GI_13375724-S | 132.7  | 147.2  | 155.7  | C14orf138 | <a href="#">NM_024558.1</a> | FLJ13920                       |             |              |             |
| GI_13375737-S | 382.8  | 383.6  | 400.1  | FLJ21616  | <a href="#">NM_024567.1</a> |                                |             |              |             |
| GI_13375741-S | 633.7  | 629    | 448    | FLJ11712  | <a href="#">NM_024570.1</a> |                                |             |              |             |
| GI_13375743-S | 342    | 356    | 279.5  | GALNT14   | <a href="#">NM_024572.1</a> | FLJ12691;GalNac-T10;GalNac-T14 |             |              |             |
| GI_13375745-S | 322.6  | 371.2  | 322.2  | C6orf211  | <a href="#">NM_024573.1</a> | FLJ12910                       |             |              |             |
| GI_13375749-S | 168    | 198.2  | 188.4  | FLJ23467  | <a href="#">NM_024575.1</a> |                                |             |              |             |
| GI_13375755-S | 1385   | 1290.1 | 1643.1 | FLJ22709  | <a href="#">NM_024578.1</a> |                                | DNA         | nucleus      | regulation  |
| GI_13375757-S | 299.9  | 537    | 329.7  | FLJ23221  | <a href="#">NM_024579.1</a> |                                |             |              |             |
| GI_13375763-S | 168.5  | 244.6  | 169.9  | FLJ23056  | <a href="#">NM_024582.1</a> |                                |             |              |             |
| GI_13375778-S | 229.8  | 243.4  | 248.6  | FLJ22386  | <a href="#">NM_024589.1</a> |                                |             |              |             |
| GI_13375784-S | 111    | 128.5  | 119.2  | FLJ13352  | <a href="#">NM_024592.1</a> |                                | copper,     | integral to  | superoxid   |
| GI_13375790-S | 391.8  | 439    | 444.8  | FLJ12666  | <a href="#">NM_024595.1</a> |                                |             |              |             |
| GI_13375792-S | 163.8  | 173.5  | 152.4  | FLJ12847  | <a href="#">NM_024596.1</a> | MCPH1                          |             | intracellula |             |
| GI_13375800-S | 375.7  | 365.3  | 209    | FLJ20898  | <a href="#">NM_024600.1</a> |                                |             |              |             |
| GI_13375806-S | 191.9  | 220.1  | 160    | FLJ11588  | <a href="#">NM_024603.1</a> |                                |             |              |             |
| GI_13375808-S | 610.1  | 643.4  | 590.6  | FLJ21908  | <a href="#">NM_024604.1</a> |                                |             |              |             |
| GI_13375814-S | 151.9  | 163.4  | 150.5  | PPP1R3B   | <a href="#">NM_024607.1</a> | GL;PPP1R4;FLJ14005             |             |              |             |
| GI_13375816-S | 125.4  | 130.2  | 130.4  | NEIL1     | <a href="#">NM_024608.1</a> | NEI1;hFPG1;FLJ22402            |             |              | DNA         |
| GI_13375829-S | 100.7  | 103.2  | 88.2   | FLJ13197  | <a href="#">NM_024614.1</a> |                                |             |              |             |
| GI_13375833-S | 339.3  | 312.7  | 421.9  | FLJ23186  | <a href="#">NM_024616.1</a> |                                |             |              |             |
| GI_13375845-S | 459.2  | 425    | 483.1  | FLJ13491  | <a href="#">NM_024623.1</a> |                                | procollage  | endoplas     | protein     |
| GI_13375849-S | 174.4  | 222.3  | 173.8  | B7-H4     | <a href="#">NM_024626.1</a> | B7X;B7S1;FLJ22418              |             |              |             |
| GI_13375859-S | 370.9  | 452.3  | 405    | FLJ23342  | <a href="#">NM_024631.1</a> |                                |             |              |             |
| GI_13375867-S | 106.6  | 122.1  | 115.1  | FLJ23153  | <a href="#">NM_024636.1</a> | TIARP                          |             |              |             |
| GI_13375882-S | 112.2  | 134.9  | 115.2  | C14orf140 | <a href="#">NM_024643.1</a> | FLJ23093                       |             |              |             |
| GI_13375884-S | 125.5  | 141.9  | 127.5  | C14orf169 | <a href="#">NM_024644.1</a> | FLJ21802                       |             |              |             |
| GI_13375886-S | 120.2  | 126.9  | 108    | FLJ13842  | <a href="#">NM_024645.1</a> |                                | RNA         | nucleus      |             |
| GI_13375890-A | 941.7  | 1052.1 | 1048.3 | FLJ22222  | <a href="#">NM_024648.1</a> |                                |             |              |             |

|               |        |        |        |           |                             |                               |            |             |            |
|---------------|--------|--------|--------|-----------|-----------------------------|-------------------------------|------------|-------------|------------|
| GI_13375900-S | 567.8  | 637.6  | 490.3  | PRKRIP1   | <a href="#">NM_024653.1</a> | C114;FLJ13902                 |            |             |            |
| GI_13375912-S | 176.3  | 166.5  | 319.1  | FLJ22573  | <a href="#">NM_024660.1</a> |                               |            |             |            |
| GI_13375918-S | 146.9  | 177.4  | 166.5  | FLJ11838  | <a href="#">NM_024664.1</a> |                               |            |             |            |
| GI_13375925-S | 6930.6 | 5807.7 | 6156.3 | FLJ12750  | <a href="#">NM_024667.1</a> |                               |            |             |            |
| GI_13375927-S | 78.4   | 93.1   | 78.5   | FLJ11795  | <a href="#">NM_024669.1</a> |                               |            |             |            |
| GI_13375951-S | 202.8  | 193.8  | 251.6  | TBC1D17   | <a href="#">NM_024682.1</a> | FLJ12168                      |            |             |            |
| GI_13375953-S | 555    | 643.5  | 626.6  | FLJ22729  | <a href="#">NM_024683.1</a> |                               |            |             |            |
| GI_13375959-S | 130.6  | 113.8  | 103.4  | FLJ23049  | <a href="#">NM_024687.1</a> |                               |            |             |            |
| GI_13375961-S | 90.2   | 106.6  | 91.1   | C10orf68  | <a href="#">NM_024688.1</a> | FLJ13031                      |            |             |            |
| GI_13375963-S | 127.8  | 125.6  | 134.1  | FLJ14103  | <a href="#">NM_024689.1</a> |                               |            |             |            |
| GI_13375978-S | 252.5  | 263.5  | 215.3  | FLJ23058  | <a href="#">NM_024696.1</a> |                               |            |             |            |
| GI_13375980-S | 189.1  | 205.8  | 206.6  | FLJ22419  | <a href="#">NM_024697.1</a> |                               | RNA        | nucleus     |            |
| GI_13375984-S | 1024.5 | 703.9  | 556.9  | FLJ14007  | <a href="#">NM_024699.1</a> |                               | molecular  |             |            |
| GI_13375990-S | 120.8  | 113.6  | 108.6  | FLJ13841  | <a href="#">NM_024702.1</a> |                               |            |             |            |
| GI_13375996-S | 229.8  | 260    | 236.4  | FLJ13639  | <a href="#">NM_024705.1</a> |                               |            |             |            |
| GI_13376000-S | 190.5  | 226.8  | 214.7  | GEMIN7    | <a href="#">NM_024707.1</a> | FLJ13956                      | pre-mRNA   | spliceoso   | nuclear    |
| GI_13376006-S | 534    | 530    | 363    | FLJ23469  | <a href="#">NM_024710.1</a> |                               | catalytic  |             | metabolis  |
| GI_13376012-S | 204.3  | 203.9  | 196.6  | FLJ22557  | <a href="#">NM_024713.1</a> |                               |            |             |            |
| GI_13376022-S | 108.9  | 121.2  | 104.7  | GRTP1     | <a href="#">NM_024719.1</a> | TBC1D6;FLJ22474               | hormone    | extracellul |            |
| GI_13376024-S | 119.8  | 135.8  | 136.9  | FLJ23510  | <a href="#">NM_024720.1</a> |                               |            |             |            |
| GI_13376028-S | 294.8  | 340.4  | 312.2  | ACBD4     | <a href="#">NM_024722.1</a> | FLJ13322                      | acyl-CoA   |             |            |
| GI_13376030-A | 254.6  | 300.9  | 265.9  | FLJ23471  | <a href="#">NM_024723.1</a> |                               |            |             |            |
| GI_13376039-S | 142.2  | 168.2  | 166.9  | FLJ23259  | <a href="#">NM_024727.1</a> |                               |            |             |            |
| GI_13376041-S | 1276.9 | 1374.5 | 1100.9 | C7orf10   | <a href="#">NM_024728.1</a> | ORF19;DERP13;FLJ11808         |            |             | metabolis  |
| GI_13376049-S | 150    | 166.7  | 152    | FLJ14351  | <a href="#">NM_024732.1</a> |                               |            |             |            |
| GI_13376059-S | 209.3  | 236.5  | 263.1  | FLJ21415  | <a href="#">NM_024738.1</a> |                               |            |             |            |
| GI_13376061-S | 856.5  | 744.3  | 834.9  | DIBD1     | <a href="#">NM_024740.1</a> | FLJ21845;DKFZp586M2420        |            |             |            |
| GI_13376063-S | 292.8  | 271.4  | 249    | ZNF408    | <a href="#">NM_024741.1</a> | FLJ12827                      | DNA        | nucleus     | regulation |
| GI_13376075-S | 180.3  | 190.3  | 177    | FLJ11539  | <a href="#">NM_024748.1</a> |                               |            |             |            |
| GI_13376079-S | 169.7  | 201.5  | 177.9  | FLJ13273  | <a href="#">NM_024751.1</a> |                               |            |             |            |
| GI_13376087-S | 791.3  | 674.7  | 516.7  | FLJ13213  | <a href="#">NM_024755.1</a> | FLJ10005                      |            |             |            |
| GI_13376090-S | 397.1  | 548.3  | 436.9  | MMRN2     | <a href="#">NM_024756.1</a> | FLJ13465;ENDOGLYX1;EndoGlyx-1 |            | extracellul |            |
| GI_13376096-S | 133.1  | 148.9  | 147.5  | FLJ13955  | <a href="#">NM_024759.1</a> |                               |            |             |            |
| GI_13376098-S | 114.1  | 154.4  | 103.9  | FLJ14009  | <a href="#">NM_024760.1</a> |                               |            |             |            |
| GI_13376104-S | 106.5  | 128.5  | 108.7  | C14orf161 | <a href="#">NM_024764.1</a> | FLJ14298                      |            |             |            |
| GI_13376108-S | 394.2  | 520.6  | 438.4  | FLJ23451  | <a href="#">NM_024766.1</a> |                               |            |             |            |
| GI_13376112-S | 96.3   | 99.7   | 90.4   | FLJ12057  | <a href="#">NM_024768.1</a> |                               |            |             |            |
| GI_13376118-S | 137.2  | 155.7  | 172    | FLJ13848  | <a href="#">NM_024771.1</a> |                               | N-         |             |            |
| GI_13376122-S | 136.8  | 130.2  | 129    | FLJ13798  | <a href="#">NM_024773.1</a> |                               |            |             |            |
| GI_13376139-S | 92.1   | 96.1   | 83.1   | FLJ23594  | <a href="#">NM_024781.1</a> |                               |            |             |            |
| GI_13376141-S | 267.8  | 311.9  | 289.1  | FLJ12610  | <a href="#">NM_024782.1</a> |                               |            |             |            |
| GI_13376149-S | 104    | 99.4   | 102.4  | ZDHHC11   | <a href="#">NM_024786.1</a> | ZNF399;FLJ13153               |            |             |            |
| GI_13376161-S | 1764.6 | 1500.7 | 1250.6 | CT120     | <a href="#">NM_024792.1</a> | FLJ22282                      | structural | ribosome    | protein    |
| GI_13376163-S | 305.1  | 400.1  | 349.9  | ABHD9     | <a href="#">NM_024794.1</a> | FLJ22408                      | epoxide    |             | response   |

|               |        |        |        |          |                             |                   |           |              |              |
|---------------|--------|--------|--------|----------|-----------------------------|-------------------|-----------|--------------|--------------|
| GI_13376165-S | 90.3   | 86.3   | 99     | FLJ22800 | <a href="#">NM_024795.1</a> |                   |           |              | integral to  |
| GI_13376167-S | 99.6   | 107.1  | 95.4   | FLJ22639 | <a href="#">NM_024796.1</a> |                   |           |              |              |
| GI_13376169-S | 97.9   | 104.6  | 104.3  | SNX22    | <a href="#">NM_024798.1</a> | FLJ13952          | protein   |              | intracellula |
| GI_13376172-S | 106.7  | 109.1  | 97.8   | FLJ13224 | <a href="#">NM_024799.1</a> |                   |           |              |              |
| GI_13376180-S | 93.2   | 114.3  | 106.1  | FLJ21665 | <a href="#">NM_024803.1</a> |                   | GTP       | microtubul   | microtubul   |
| GI_13376182-S | 184    | 295.5  | 231.1  | FLJ12606 | <a href="#">NM_024804.1</a> |                   | nucleic   | intracellula | regulation   |
| GI_13376184-S | 427.5  | 351.4  | 401.4  | FLJ21172 | <a href="#">NM_024805.1</a> |                   |           |              | rRNA         |
| GI_13376186-I | 117.3  | 147.9  | 101.3  | FLJ23554 | <a href="#">NM_024806.1</a> |                   |           |              |              |
| GI_13376188-S | 114.5  | 129.4  | 108.2  | C6orf76  | <a href="#">NM_024807.1</a> | TLT2;FLJ13693     |           |              |              |
| GI_13376194-S | 380.1  | 476.6  | 417.1  | FLJ23018 | <a href="#">NM_024810.1</a> |                   |           |              |              |
| GI_13376199-S | 337.2  | 363.7  | 323.4  | BAALC    | <a href="#">NM_024812.1</a> | FLJ12015          |           |              |              |
| GI_13376201-S | 369.2  | 257.7  | 204.8  | FLJ13150 | <a href="#">NM_024813.1</a> |                   |           |              |              |
| GI_13376203-S | 381.6  | 447.1  | 374.6  | CBLL1    | <a href="#">NM_024814.1</a> | HAKAI;FLJ23109    |           |              |              |
| GI_13376207-S | 782.4  | 1031.7 | 1403.2 | FRA      | <a href="#">NM_024816.1</a> | FLJ23282          |           | catalytic    |              |
| GI_13376209-S | 342.5  | 357.3  | 412.7  | FLJ13710 | <a href="#">NM_024817.1</a> |                   |           |              |              |
| GI_13376215-S | 101.8  | 124.3  | 109.3  | FLJ22349 | <a href="#">NM_024821.1</a> |                   |           |              |              |
| GI_13376219-S | 129    | 146    | 131.9  | FLJ21596 | <a href="#">NM_024823.1</a> |                   |           |              |              |
| GI_13376225-S | 97.8   | 98.8   | 101.8  | FLJ21159 | <a href="#">NM_024826.1</a> |                   |           |              |              |
| GI_13376227-S | 193.6  | 219.7  | 201.8  | HDAC11   | <a href="#">NM_024827.1</a> | FLJ22237          | hydrolase | nucleus      | regulation   |
| GI_13376229-S | 930.5  | 961.2  | 910.9  | C9orf82  | <a href="#">NM_024828.1</a> | FLJ13657          |           |              |              |
| GI_13376239-S | 281    | 260.1  | 491.1  | FLJ23506 | <a href="#">NM_024833.1</a> |                   | nucleic   | intracellula | regulation   |
| GI_13376242-S | 237.1  | 254.2  | 260.6  | FLJ13081 | <a href="#">NM_024834.1</a> |                   |           |              |              |
| GI_13376244-S | 1519.4 | 1462.1 | 1295.6 | ZNF403   | <a href="#">NM_024835.1</a> | DIF3;LZK1;DIF-    |           |              |              |
| GI_13376246-S | 286.6  | 361.6  | 353.7  | FLJ22301 | <a href="#">NM_024836.1</a> |                   |           |              |              |
| GI_13376252-S | 3973   | 3047.9 | 3535.3 | RPP21    | <a href="#">NM_024839.1</a> | FLJ22638          |           |              |              |
| GI_13376260-S | 225.2  | 271    | 247.7  | FLJ14154 | <a href="#">NM_024845.1</a> |                   |           | N-           |              |
| GI_13376262-S | 132.4  | 153.3  | 141.3  | FLJ11710 | <a href="#">NM_024846.1</a> |                   |           |              |              |
| GI_13376266-S | 133.5  | 125.5  | 114.7  | FLJ13941 | <a href="#">NM_024848.1</a> |                   | DNA       | nucleus      | regulation   |
| GI_13376268-S | 177.6  | 215.1  | 207.6  | FLJ14126 | <a href="#">NM_024849.1</a> |                   |           |              |              |
| GI_13376270-S | 161.8  | 184.2  | 179.7  | FLJ21458 | <a href="#">NM_024850.1</a> |                   |           |              |              |
| GI_13376276-S | 118.8  | 118.6  | 108.5  | FLJ13385 | <a href="#">NM_024853.1</a> |                   |           |              |              |
| GI_13376278-S | 387.7  | 342.5  | 532.8  | FLJ22028 | <a href="#">NM_024854.1</a> |                   | disulfide |              | electron     |
| GI_13376285-S | 97.1   | 110.2  | 109.1  | FLJ21687 | <a href="#">NM_024859.1</a> | JM10              | protein   | nucleus      | intracellula |
| GI_13376287-S | 426.2  | 427    | 446.4  | FLJ21148 | <a href="#">NM_024860.1</a> |                   |           |              |              |
| GI_13376289-S | 167.9  | 196.5  | 166.3  | FLJ22671 | <a href="#">NM_024861.1</a> |                   |           |              |              |
| GI_13376291-S | 185.7  | 196.3  | 178.4  | FLJ13962 | <a href="#">NM_024862.1</a> |                   |           |              |              |
| GI_13376297-S | 121    | 127.5  | 121    | NANOG    | <a href="#">NM_024865.1</a> | FLJ12581;FLJ40451 |           |              |              |
| GI_13376301-S | 149    | 163.5  | 152.9  | FLJ14124 | <a href="#">NM_024868.1</a> |                   |           |              |              |
| GI_13376303-S | 141    | 175.8  | 149.4  | FLJ14050 | <a href="#">NM_024869.1</a> |                   | DNA       | nucleus      | regulation   |
| GI_13376305-S | 223    | 201.5  | 198.3  | FLJ12748 | <a href="#">NM_024871.1</a> |                   |           |              |              |
| GI_13376307-S | 112.1  | 119    | 121    | FLJ22570 | <a href="#">NM_024872.1</a> |                   |           |              |              |
| GI_13376313-S | 90.8   | 91.5   | 71.2   | SYNPO2L  | <a href="#">NM_024875.1</a> | FLJ12921          |           |              |              |
| GI_13376317-S | 161.3  | 211.2  | 181.7  | FLJ13265 | <a href="#">NM_024877.1</a> |                   | cyclin-   |              | cytokinesi   |
| GI_13376321-S | 220.7  | 250.4  | 250.5  | FLJ23556 | <a href="#">NM_024880.1</a> |                   |           |              |              |

|               |       |       |       |           |                             |                           |            |             |            |
|---------------|-------|-------|-------|-----------|-----------------------------|---------------------------|------------|-------------|------------|
| GI_13376326-S | 99.5  | 92.9  | 103.9 | C6orf155  | <a href="#">NM_024882.1</a> | FLJ13189;dJ288M22.3       | DNA        | nucleus     | regulation |
| GI_13376328-S | 138.8 | 102.1 | 140.8 | FLJ22202  | <a href="#">NM_024883.1</a> |                           |            |             |            |
| GI_13376330-S | 263.4 | 280.3 | 294.7 | C14orf160 | <a href="#">NM_024884.1</a> | FLJ12618                  |            |             |            |
| GI_13376332-S | 94    | 102.8 | 85.4  | TAF7L     | <a href="#">NM_024885.1</a> | TAF2Q;FLJ23157;dJ738A13.1 |            |             |            |
| GI_13376334-S | 86.2  | 75.9  | 81.2  | FLJ14280  | <a href="#">NM_024886.1</a> |                           |            |             |            |
| GI_13376338-S | 99.8  | 151.8 | 121.6 | FLJ11535  | <a href="#">NM_024888.1</a> |                           |            |             |            |
| GI_13376342-S | 114.8 | 117.1 | 109.2 | FLJ11783  | <a href="#">NM_024891.1</a> |                           |            |             |            |
| GI_13376346-S | 158.2 | 271.7 | 178.5 | C20orf39  | <a href="#">NM_024893.1</a> | FLJ14220                  |            |             |            |
| GI_13376352-S | 128.3 | 146.7 | 116.7 | FAM31C    | <a href="#">NM_024898.1</a> | FLJ22757                  |            |             |            |
| GI_13376362-S | 102.5 | 97.6  | 82.3  | SCD4      | <a href="#">NM_024906.1</a> | ACOD4;FLJ21032            |            |             |            |
| GI_13376366-S | 207.7 | 199.3 | 183.3 | FLJ12973  | <a href="#">NM_024908.1</a> |                           |            |             |            |
| GI_13376368-S | 235.9 | 339.6 | 307.8 | C6orf134  | <a href="#">NM_024909.1</a> | FLJ13158                  |            |             |            |
| GI_13376370-S | 116.7 | 122.2 | 104.6 | FLJ12700  | <a href="#">NM_024910.1</a> |                           |            |             |            |
| GI_13376375-S | 286.1 | 365   | 330.8 | FLJ14327  | <a href="#">NM_024912.1</a> |                           |            |             |            |
| GI_13376379-S | 194.6 | 206.6 | 194.7 | FLJ13262  | <a href="#">NM_024914.1</a> |                           |            |             |            |
| GI_13376381-S | 109.3 | 126.2 | 117.3 | TFCP2L3   | <a href="#">NM_024915.1</a> | DFNA28;FLJ13782           |            |             |            |
| GI_13376383-S | 111.3 | 106.5 | 94.6  | FLJ22814  | <a href="#">NM_024916.1</a> |                           |            |             |            |
| GI_13376399-S | 181.5 | 241.5 | 173.7 | FLJ12571  | <a href="#">NM_024926.1</a> |                           |            |             |            |
| GI_13376403-S | 96.2  | 112   | 111   | C6orf59   | <a href="#">NM_024929.1</a> | FLJ23112                  |            |             |            |
| GI_13376405-S | 145.3 | 171   | 164.3 | FLJ22659  | <a href="#">NM_024934.1</a> |                           |            |             |            |
| GI_13376418-S | 201.1 | 260.9 | 264.3 | FLJ13611  | <a href="#">NM_024941.1</a> |                           |            |             |            |
| GI_13376420-S | 390.1 | 320.3 | 306.7 | C10orf88  | <a href="#">NM_024942.1</a> | FLJ13490                  | ATP        | membran     | transport  |
| GI_13376422-S | 397.1 | 529.4 | 292.8 | FLJ23235  | <a href="#">NM_024943.1</a> |                           |            |             |            |
| GI_13376426-S | 359.4 | 310.4 | 308.2 | C9orf76   | <a href="#">NM_024945.1</a> | FLJ12888                  |            |             |            |
| GI_13376428-S | 334.7 | 430.3 | 371.2 | NIP30     | <a href="#">NM_024946.1</a> | CDA10;CDA018;FLJ21799     |            | nucleus     |            |
| GI_13376430-S | 695.4 | 700.8 | 553.7 | FLJ13397  | <a href="#">NM_024948.1</a> | CARP                      | calcium    |             |            |
| GI_13376434-S | 294.9 | 331.6 | 296.7 | FLJ12891  | <a href="#">NM_024950.1</a> |                           |            |             |            |
| GI_13376446-S | 770.5 | 822.4 | 809.5 | C20orf98  | <a href="#">NM_024958.1</a> | FLJ23329;dJ1103G7.6       |            | integral to |            |
| GI_13376452-S | 101.5 | 112.2 | 98.7  | FLJ11370  | <a href="#">NM_024961.1</a> |                           |            |             |            |
| GI_13376459-S | 102.2 | 108.5 | 95.4  | ZNF556    | <a href="#">NM_024967.1</a> | FLJ11637                  | nucleic    | nucleus     | regulation |
| GI_13376465-S | 225.5 | 268.9 | 224.2 | FLJ11722  | <a href="#">NM_024970.1</a> |                           |            |             |            |
| GI_13376473-S | 115.4 | 126   | 110.3 | FLJ11800  | <a href="#">NM_024974.1</a> |                           |            |             |            |
| GI_13376475-S | 171.1 | 239.8 | 191.9 | FLJ11996  | <a href="#">NM_024976.1</a> |                           |            |             |            |
| GI_13376477-S | 183.4 | 206.3 | 186.5 | FLJ12078  | <a href="#">NM_024977.1</a> |                           |            |             |            |
| GI_13376479-S | 103.1 | 113.6 | 100   | FLJ12121  | <a href="#">NM_024978.1</a> |                           |            |             |            |
| GI_13376487-S | 96    | 96.9  | 93.3  | FLJ12331  | <a href="#">NM_024986.1</a> |                           | structural | ribosome    | protein    |
| GI_13376491-S | 126.9 | 136.1 | 134.7 | FLJ12355  | <a href="#">NM_024988.1</a> |                           | DNA        | nucleus     | regulation |
| GI_13376493-S | 91.1  | 99.2  | 92.4  | PGAP1     | <a href="#">NM_024989.1</a> | FLJ12377                  | catalytic  |             | lipid      |
| GI_13376495-S | 178.3 | 205.2 | 161   | FLJ12547  | <a href="#">NM_024992.1</a> |                           |            |             |            |
| GI_13376499-S | 321.4 | 414.9 | 348.3 | FLJ12595  | <a href="#">NM_024994.1</a> |                           |            |             |            |
| GI_13376510-S | 227.7 | 251.4 | 249.7 | FLJ13096  | <a href="#">NM_025000.1</a> |                           |            |             |            |
| GI_13376514-S | 81.7  | 89.9  | 79.2  | C6orf208  | <a href="#">NM_025002.1</a> | FLJ13162;dJ182D15.1       |            |             |            |
| GI_13376518-S | 150.2 | 169.7 | 148.2 | FLJ13215  | <a href="#">NM_025004.1</a> |                           |            |             |            |
| GI_13376520-S | 80.9  | 90.5  | 92.7  | FLJ13315  | <a href="#">NM_025005.1</a> |                           |            |             |            |

|               |        |        |        |           |                             |                     |                           |
|---------------|--------|--------|--------|-----------|-----------------------------|---------------------|---------------------------|
| GI_13376526-S | 125.4  | 121.3  | 107.4  | FLJ13544  | <a href="#">NM_025008.1</a> |                     |                           |
| GI_13376528-S | 6035.5 | 8181.9 | 6357.5 | FLJ13621  | <a href="#">NM_025009.1</a> |                     |                           |
| GI_13376530-S | 98.7   | 116.3  | 103.7  | FLJ13744  | <a href="#">NM_025011.1</a> |                     |                           |
| GI_13376532-S | 122.3  | 127.8  | 120.9  | FLJ13769  | <a href="#">NM_025012.1</a> |                     |                           |
| GI_13376538-S | 113.6  | 102.4  | 103.7  | TUBA4     | <a href="#">NM_025019.1</a> | FLJ13940            | GTP microtubul microtubul |
| GI_13376540-S | 126.9  | 145.8  | 125.4  | FLJ14069  | <a href="#">NM_025023.1</a> |                     |                           |
| GI_13376542-S | 112.2  | 142.5  | 111.7  | FLJ14082  | <a href="#">NM_025024.1</a> |                     |                           |
| GI_13376545-S | 150    | 174.3  | 165.2  | FLJ14100  | <a href="#">NM_025025.1</a> |                     |                           |
| GI_13376547-S | 252.2  | 277.4  | 258.2  | FLJ14107  | <a href="#">NM_025026.1</a> |                     |                           |
| GI_13376551-S | 198.8  | 211.2  | 187.5  | FLJ14346  | <a href="#">NM_025029.1</a> |                     |                           |
| GI_13376553-S | 516.6  | 625.4  | 550.3  | FLJ20972  | <a href="#">NM_025030.1</a> |                     |                           |
| GI_13376555-S | 98.3   | 96.8   | 89.6   | FLJ21075  | <a href="#">NM_025031.1</a> |                     |                           |
| GI_13376557-S | 174.2  | 172.9  | 154.7  | FLJ21272  | <a href="#">NM_025032.1</a> |                     |                           |
| GI_13376561-S | 129.6  | 151.1  | 126.5  | FLJ21290  | <a href="#">NM_025034.1</a> |                     |                           |
| GI_13376565-S | 180.6  | 230.5  | 201.7  | FLJ22173  | <a href="#">NM_025041.1</a> |                     |                           |
| GI_13376573-S | 126.7  | 141.3  | 140.2  | FLJ22595  | <a href="#">NM_025047.1</a> |                     | GTP protein               |
| GI_13376575-S | 94.4   | 111.7  | 103.4  | FLJ22684  | <a href="#">NM_025048.1</a> |                     |                           |
| GI_13376577-S | 117.1  | 144.4  | 146.3  | C15orf20  | <a href="#">NM_025049.1</a> | FLJ22692            |                           |
| GI_13376579-S | 120.6  | 136.9  | 125.2  | FLJ23022  | <a href="#">NM_025051.1</a> |                     |                           |
| GI_13376581-S | 181.2  | 221.5  | 211.9  | FLJ23074  | <a href="#">NM_025052.1</a> |                     | protein- protein          |
| GI_13376588-S | 133.1  | 110.2  | 119.2  | FLJ23185  | <a href="#">NM_025056.1</a> |                     |                           |
| GI_13376590-S | 124.4  | 196.1  | 153.7  | C14orf45  | <a href="#">NM_025057.1</a> | FLJ23189            |                           |
| GI_13376600-S | 99     | 118    | 96.5   | FLJ23550  | <a href="#">NM_025063.1</a> |                     |                           |
| GI_13376602-S | 95.8   | 97.5   | 91     | FLJ23604  | <a href="#">NM_025064.1</a> |                     |                           |
| GI_13376606-S | 125.1  | 130.9  | 121.7  | FLJ14106  | <a href="#">NM_025067.1</a> |                     |                           |
| GI_13376610-S | 397.4  | 418.5  | 335.6  | FLJ14299  | <a href="#">NM_025069.1</a> |                     |                           |
| GI_13376614-S | 90.3   | 92.8   | 90.4   | FLJ12190  | <a href="#">NM_025071.1</a> |                     |                           |
| GI_13376618-S | 116.6  | 138.3  | 133.5  | FLJ21168  | <a href="#">NM_025073.1</a> |                     |                           |
| GI_13376622-S | 3889.9 | 3930.5 | 3655.1 | NIF3L1BP1 | <a href="#">NM_025075.1</a> | FLJ23445            |                           |
| GI_13376631-S | 289.6  | 332.5  | 284.1  | FLJ23231  | <a href="#">NM_025079.1</a> |                     |                           |
| GI_13376635-S | 535.4  | 576.8  | 566.5  | FLJ13111  | <a href="#">NM_025082.1</a> |                     |                           |
| GI_13376641-S | 127.4  | 134.4  | 111.5  | FLJ22596  | <a href="#">NM_025086.1</a> |                     |                           |
| GI_13376643-S | 105.6  | 121.7  | 93.7   | FLJ21511  | <a href="#">NM_025087.1</a> |                     |                           |
| GI_13376645-S | 137.5  | 156.9  | 157.7  | FLJ13241  | <a href="#">NM_025088.1</a> |                     |                           |
| GI_13376651-S | 193.4  | 254.1  | 175.2  | FLJ22635  | <a href="#">NM_025092.1</a> |                     |                           |
| GI_13376653-S | 79.4   | 76.2   | 73.2   | FLJ11827  | <a href="#">NM_025093.1</a> |                     |                           |
| GI_13376657-S | 87.5   | 107.9  | 85.3   | FLJ23558  | <a href="#">NM_025095.1</a> |                     |                           |
| GI_13376659-S | 3246.1 | 4051.7 | 3606.6 | FLJ21106  | <a href="#">NM_025097.1</a> |                     |                           |
| GI_13376664-S | 639.1  | 517.2  | 382.4  | FLJ22170  | <a href="#">NM_025099.1</a> |                     |                           |
| GI_13376666-S | 102.2  | 104.2  | 101.5  | C14orf157 | <a href="#">NM_025100.1</a> |                     |                           |
| GI_13376668-S | 356    | 386.7  | 411.8  | CCDC2     | <a href="#">NM_025103.1</a> | CMG1;CMG-1;FLJ22621 |                           |
| GI_13376672-S | 124.9  | 126.9  | 129    | FLJ12409  | <a href="#">NM_025105.1</a> |                     |                           |
| GI_13376676-S | 218.4  | 257.2  | 207.9  | MYCT1     | <a href="#">NM_025107.1</a> | MTLC;FLJ21269       |                           |
| GI_13376678-S | 659    | 458.3  | 667.4  | FLJ13909  | <a href="#">NM_025108.1</a> |                     |                           |



|               |        |        |        |           |                             |                                   |             |              |             |
|---------------|--------|--------|--------|-----------|-----------------------------|-----------------------------------|-------------|--------------|-------------|
| GI_13376686-S | 134    | 165.3  | 143.8  | C13orf18  | <a href="#">NM_025113.1</a> | FLJ21562                          |             |              |             |
| GI_13376688-S | 84     | 90.8   | 79.4   | FLJ13615  | <a href="#">NM_025114.1</a> |                                   |             |              |             |
| GI_13376690-S | 663.4  | 741.1  | 698.9  | FLJ23263  | <a href="#">NM_025115.1</a> |                                   |             |              |             |
| GI_13376694-S | 101.1  | 161.1  | 280.1  | FLJ11871  | <a href="#">NM_025117.1</a> |                                   |             |              |             |
| GI_13376696-S | 259.6  | 315.1  | 285.5  | FLJ13310  | <a href="#">NM_025118.1</a> |                                   |             |              |             |
| GI_13376700-S | 388    | 441.3  | 424.7  | FLJ21749  | <a href="#">NM_025124.1</a> |                                   |             |              |             |
| GI_13376716-S | 379.6  | 407.4  | 389.6  | OPA3      | <a href="#">NM_025136.1</a> | MGA3;FLJ22187                     | kinesin     | vision       |             |
| GI_13376724-S | 302.1  | 289    | 209.1  | FLJ22471  | <a href="#">NM_025140.1</a> |                                   |             |              |             |
| GI_13376728-S | 165.4  | 183.6  | 158    | C21orf96  | <a href="#">NM_025143.1</a> |                                   |             |              |             |
| GI_13376734-S | 712.1  | 753.1  | 613.1  | MAK3P     | <a href="#">NM_025146.1</a> | FLJ13194                          | N-          |              |             |
| GI_13376746-S | 630.2  | 701.6  | 609    | C14orf127 | <a href="#">NM_025152.1</a> | FLJ12660                          | ATP         |              |             |
| GI_13376748-S | 130.2  | 163.6  | 151.5  | FLJ21477  | <a href="#">NM_025153.1</a> |                                   | ATP         | membran      | cation      |
| GI_13376750-S | 1248   | 1448   | 1134.3 | FLJ11848  | <a href="#">NM_025155.1</a> |                                   |             |              |             |
| GI_13376758-S | 104.7  | 96.8   | 109.4  | FLJ11577  | <a href="#">NM_025159.1</a> |                                   | oxidoredu   |              | metabolis   |
| GI_13376767-S | 172.7  | 142.2  | 157.5  | ELL3      | <a href="#">NM_025165.1</a> | FLJ22637                          |             |              |             |
| GI_13376779-S | 174.5  | 148.8  | 150.8  | TRIM45    | <a href="#">NM_025188.1</a> | RNF99;FLJ13181                    | zinc ion    | intracellula |             |
| GI_13376797-S | 150.7  | 152.4  | 146    | FLJ21945  | <a href="#">NM_025203.1</a> | PP384                             |             |              |             |
| GI_13376801-S | 513.7  | 588.1  | 490.8  | EG1       | <a href="#">NM_025205.1</a> | DKFZP434N185                      |             |              |             |
| GI_13376811-S | 96.3   | 115.7  | 101.2  | I-4       | <a href="#">NM_025210.1</a> |                                   | protein     | cellular_co  | protein     |
| GI_13376815-S | 320.6  | 337.3  | 318.2  | CXXC4     | <a href="#">NM_025212.1</a> | IDAX                              | zinc ion    | cellular_co  | negative    |
| GI_13376817-S | 260.3  | 325    | 275.8  | SE57-1    | <a href="#">NM_025214.1</a> |                                   |             |              |             |
| GI_13376825-S | 202.6  | 244.7  | 217.4  | ULBP1     | <a href="#">NM_025218.1</a> | RAET11                            | MHC         | membran      | immune      |
| GI_13376833-S | 222.7  | 219.6  | 205.5  | ZNF435    | <a href="#">NM_025231.1</a> | FLJ22191                          | transcripti | nucleus      | regulation  |
| GI_13376839-S | 1863.8 | 2352.3 | 2410.2 | REC14     | <a href="#">NM_025234.1</a> |                                   |             |              |             |
| GI_13376845-S | 157.3  | 191.1  | 174.1  | SOST      | <a href="#">NM_025237.1</a> |                                   | molecular   | cellular_co  | negative    |
| GI_13376847-S | 1502.6 | 1800.4 | 1468.1 | BTBD1     | <a href="#">NM_025238.1</a> | FLJ20724                          | protein     | cellular_co  | biological_ |
| GI_13376851-S | 253.3  | 330.3  | 324.7  | B7H3      | <a href="#">NM_025240.1</a> |                                   | molecular   | cellular_co  | immune      |
| GI_13376853-S | 1334.8 | 1287.5 | 1284.6 | UBXD1     | <a href="#">NM_025241.1</a> | UBXDC2                            |             |              |             |
| GI_13376857-A | 138.7  | 156.8  | 139.3  | TSGA10    | <a href="#">NM_025244.1</a> |                                   | porin       | mitochond    |             |
| GI_13376859-S | 1096.3 | 1056.1 | 1095.4 | TMEM22    | <a href="#">NM_025246.1</a> | MGC3295;DKFZp564K2464             |             | membran      |             |
| GI_13376861-S | 107.9  | 105.2  | 90.2   | C6orf27   | <a href="#">NM_025258.1</a> | G7c;NG37                          |             |              |             |
| GI_13376867-A | 159.2  | 195.8  | 170.4  | C6orf29   | <a href="#">NM_025257.1</a> | CTL4;NG22;FLJ14491                |             |              |             |
| GI_13376873-S | 91     | 96     | 107.4  | LY6G6C    | <a href="#">NM_025261.1</a> | G6c;NG24;C6orf24                  |             |              |             |
| GI_13376875-S | 220.3  | 302    | 235.3  | LY6G5C    | <a href="#">NM_025262.1</a> | G5c;NG33;C6orf20;LY6G5CA;LY6G5CB  |             |              |             |
| GI_13376877-S | 1737.1 | 1339   | 1046.3 | PRR3      | <a href="#">NM_025263.1</a> | CAT56                             | nucleic     | nucleus      | regulation  |
| GI_13376994-S | 756    | 911.7  | 698.3  | ME2       | <a href="#">NM_002396.2</a> |                                   | malate      | mitochond    | pyruvate    |
| GI_13376995-S | 231.1  | 326.3  | 288.4  | WFS1      | <a href="#">NM_006005.2</a> | WFS;WFRS;DFNA6;DFNA14;DFNA38;DIDM |             | integral to  | vision      |
| GI_13376997-S | 161.5  | 182    | 164.9  | FES       | <a href="#">NM_002005.2</a> | FPS                               | protein-    |              | protein     |
| GI_13376998-S | 129.5  | 137.9  | 136.6  | CRYGA     | <a href="#">NM_014617.2</a> | CRYG1;CRYG5;CRY-g-A               | structural  |              | vision      |
| GI_13376999-S | 111.1  | 109.9  | 108    | CRYGB     | <a href="#">NM_005210.2</a> | CRYG2                             | structural  | cellular_co  | biological_ |
| GI_13377000-S | 119.6  | 136    | 131.4  | CRYGC     | <a href="#">NM_020989.2</a> | CCL;CRYG3                         | structural  | cellular_co  | biological_ |
| GI_13377001-S | 93.1   | 94.7   | 99.4   | CRYGD     | <a href="#">NM_006891.2</a> | CACA;CRYG4;cry-g-D                | structural  |              | vision      |
| GI_13377003-S | 114.5  | 124.3  | 110.8  | CRYGS     | <a href="#">NM_017541.2</a> | CRYG8                             | structural  |              | cell shape  |
| GI_13378148-A | 115.6  | 115.4  | 112.7  | LRRC1     | <a href="#">NM_025168.1</a> | LANO;FLJ10775;FLJ11834;dJ523E19.1 |             |              |             |

|               |        |        |        |            |                             |                                        |             |             |             |
|---------------|--------|--------|--------|------------|-----------------------------|----------------------------------------|-------------|-------------|-------------|
| GI_13378148-I | 110.5  | 112.6  | 106.7  | LRRC1      | <a href="#">NM_025168.1</a> | LANO;FLJ10775;FLJ11834;dJ523E19.1      |             |             |             |
| GI_13384595-S | 1408.5 | 1041.8 | 727.6  | ZNF330     | <a href="#">NM_014487.2</a> | NOA36;HSA6591                          | electron    | centromer   | mitosis     |
| GI_13384599-S | 700.8  | 641.9  | 491    | SPATA7     | <a href="#">NM_018418.1</a> | HSD3;HSD-3.1                           |             |             |             |
| GI_13384601-S | 102.8  | 193.3  | 112    | FLJ23403   | <a href="#">NM_022068.1</a> | FLJ23144                               |             |             |             |
| GI_13385593-S | 2874.2 | 3030.1 | 3027.8 | CYB5-M     | <a href="#">NM_030579.1</a> |                                        |             | mitochond   | electron    |
| GI_13386461-A | 391.9  | 431.1  | 460.1  | MASK       | <a href="#">NM_024668.1</a> | FLJ10042;FLJ11979;FLJ14127;FLJ20288;KI |             |             |             |
| GI_13386461-I | 534.2  | 435.1  | 547    | MASK       | <a href="#">NM_024668.1</a> | FLJ10042;FLJ11979;FLJ14127;FLJ20288;KI |             |             |             |
| GI_13386481-S | 107.2  | 109.2  | 94.7   | MGC10946   | <a href="#">NM_030572.1</a> |                                        |             |             |             |
| GI_13386483-S | 386.4  | 421.9  | 385.8  | THAP7      | <a href="#">NM_030573.1</a> | MGC10963                               | DNA         |             |             |
| GI_13386487-S | 3611.2 | 2432.7 | 2469.9 | MGC10334   | <a href="#">NM_030575.1</a> |                                        | DNA         | nucleus     | regulation  |
| GI_13386491-S | 291.1  | 263.5  | 241.4  | MGC10993   | <a href="#">NM_030577.1</a> |                                        |             |             |             |
| GI_13386499-A | 96     | 92.9   | 80.6   | CACNA1A    | <a href="#">NM_000068.2</a> | EA2;FHM;MHP;APCA;HPCA;MHP1;SCA6;C      | voltage-    | voltage-    | small       |
| GI_13386501-S | 133.6  | 138.2  | 127.8  | BARX1      | <a href="#">NM_021570.2</a> |                                        | transcripti | nuclear     | transcripti |
| GI_13386504-S | 92.2   | 101.1  | 95.5   | CYP3A7     | <a href="#">NM_000765.2</a> | CP37;P450-HFLA                         | cytochrom   | membran     | electron    |
| GI_13386511-A | 208.6  | 244.1  | 206.8  | WT1        | <a href="#">NM_000378.2</a> | GUD;WAGR;WT33;WIT-2                    | transcripti | nucleus     | regulation  |
| GI_13399295-S | 120.4  | 147.6  | 132.8  | MAZ        | <a href="#">NM_002383.1</a> | PUR1;ZF87;SAF-1;SAF-2                  | RNA         |             | transcripti |
| GI_13399303-S | 184.8  | 401.1  | 321    | APOBEC3G   | <a href="#">NM_021822.1</a> | ARP9;CEM15;MDS019;FLJ12740;bK150C2.7   | zinc ion    |             |             |
| GI_13399321-S | 1918.8 | 1859.7 | 1426.6 | FLJ10774   | <a href="#">NM_024662.1</a> | ALP;FLJ12179;KIAA1709;DKFZp434C116     | N-          | nucleus     | biological_ |
| GI_13430847-S | 261.7  | 325.8  | 307.3  | NR1D1      | <a href="#">NM_021724.1</a> | EAR1;hRev;THRA1;THRAL;ear-1            | transcripti | nucleus     | regulation  |
| GI_13430851-S | 153.9  | 197.9  | 172.9  | DKFZp434L0 | <a href="#">NM_017558.1</a> | FLJ12871                               |             |             |             |
| GI_13430853-A | 173.3  | 96.7   | 75.7   | NXF2       | <a href="#">NM_022053.1</a> | TAPL-2;FLJ20416                        | protein     | nucleus     | protein-    |
| GI_13430853-I | 136.1  | 142.7  | 125.2  | NXF2       | <a href="#">NM_022053.1</a> | TAPL-2;FLJ20416                        | protein     | nucleus     | protein-    |
| GI_13430855-S | 543    | 459.1  | 625.8  | C6orf79    | <a href="#">NM_022102.1</a> | FLJ20958                               |             |             |             |
| GI_13430859-S | 313.9  | 394.2  | 355.9  | HIPK2      | <a href="#">NM_022740.1</a> | PRO0593                                | transcripti | nucleus     |             |
| GI_13430863-A | 185.9  | 461.9  | 213    | NDRG4      | <a href="#">NM_022910.1</a> | SMAP-8;KIAA1180;MGC19632               |             | cytoplasm   | response    |
| GI_13430867-S | 170.4  | 187    | 156.9  | MGC2615    | <a href="#">NM_024103.1</a> |                                        |             |             |             |
| GI_13430871-S | 97.2   | 107    | 109.7  | FLJ14075   | <a href="#">NM_024894.1</a> | FLJ13938                               |             |             |             |
| GI_13430873-S | 112.9  | 114.4  | 116.2  | FLJ12985   | <a href="#">NM_024924.1</a> |                                        |             |             |             |
| GI_13430877-S | 127.8  | 152    | 141    | KIAA0795   | <a href="#">NM_025010.1</a> | FLJ13703                               | protein     |             |             |
| GI_13430881-A | 287.5  | 292.2  | 291.7  | MECT1      | <a href="#">NM_025021.1</a> | TORC1;WAMTP1;FLJ14027;KIAA0616         |             |             |             |
| GI_13435126-S | 113.1  | 140.4  | 103.7  | T3JAM      | <a href="#">NM_025228.1</a> | DJ434O14.3                             |             |             |             |
| GI_13435128-S | 327    | 518.7  | 341.8  | HSA9947    | <a href="#">NM_022089.1</a> |                                        | ATP         | integral to | cation      |
| GI_13435134-S | 85     | 103.4  | 85.2   | TSPYQ1     | <a href="#">NM_022573.1</a> |                                        | DNA         | nucleus     | nucleoso    |
| GI_13435144-S | 248    | 264.4  | 230.1  | KIAA0643   | <a href="#">NM_024793.1</a> | FLJ13297                               |             |             |             |
| GI_13435146-S | 155    | 159.6  | 165.5  | FLJ14297   | <a href="#">NM_024903.1</a> |                                        |             |             |             |
| GI_13435148-S | 131.9  | 135.9  | 132.1  | FLJ21918   | <a href="#">NM_024939.1</a> | FLJ22248                               |             | nucleic     |             |
| GI_13435160-A | 153    | 156.2  | 145.8  | SPTBN4     | <a href="#">NM_025213.1</a> | QV;SPTBN3;KIAA1642                     |             |             |             |
| GI_13435349-A | 2259.4 | 2621.4 | 2197   | FDXR       | <a href="#">NM_024417.1</a> | ADXR                                   | ferredoxin- | mitochond   | electron    |
| GI_13435352-A | 140.7  | 200    | 159.8  | L1CAM      | <a href="#">NM_024003.1</a> | S10;HSAS;MASA;MIC5;SPG1;CAML1;CD17     | cell        | integral to | cell        |
| GI_13435355-S | 4371.1 | 3933.9 | 3526.9 | HAX1       | <a href="#">NM_006118.2</a> |                                        | DNA         | nuclear     | regulation  |
| GI_13435358-S | 1434.9 | 2010   | 1751.8 | DDB1       | <a href="#">NM_001923.2</a> | DDBA;XAP1;XPCE;XPE-BF;UV-DDB1          | damaged     | nucleus     | pyrimidine- |
| GI_13435360-A | 212.6  | 247    | 228.3  | DSC1       | <a href="#">NM_024421.1</a> | CDHF1;DG2/DG3                          | cell        | gap         | cell shape  |
| GI_13435367-A | 156.5  | 184    | 155.6  | DSC3       | <a href="#">NM_001941.2</a> | DSC;DSC1;DSC2;DSC4;CDHF3;HT-CP         | cell        | cytoskelet  | cell        |
| GI_13435374-A | 154.4  | 170.7  | 184.3  | GMEB1      | <a href="#">NM_024482.1</a> | PIF96;P96PIF                           | transcripti | kinesin     |             |

|               |        |        |        |            |                             |                                       |             |             |              |
|---------------|--------|--------|--------|------------|-----------------------------|---------------------------------------|-------------|-------------|--------------|
| GI_13435378-S | 713.6  | 670.3  | 857.7  | GMEB2      | <a href="#">NM_012384.2</a> | PIF79;P79PIF;KIAA1269                 | RNA         | kinesin     | invasive     |
| GI_13435379-S | 167.2  | 172.5  | 154.4  | RETN       | <a href="#">NM_020415.2</a> | ADSF;RSTN;FIZZ3;RETN1                 | hormone     | extracellul | biological_  |
| GI_13435380-S | 5204.3 | 5536.4 | 4669.4 | GPS1       | <a href="#">NM_004127.3</a> | COPS1                                 | GTPase      |             | JNK          |
| GI_13435382-S | 252.8  | 229.9  | 226.3  | FLJ20628   | <a href="#">NM_017910.2</a> | DKFZp564I2178                         | S-          |             |              |
| GI_13435384-S | 634.2  | 829.2  | 754.4  | GTF2B      | <a href="#">NM_001514.2</a> | TF2B;TFIIB                            | general     | transcripti | transcripti  |
| GI_13435387-S | 501.5  | 583.9  | 586.1  | CYP4A11    | <a href="#">NM_000778.2</a> | CP4Y;CYP4A2;CYP4AII                   | fatty acid  | microsom    | fatty acid   |
| GI_13435388-S | 104.5  | 93.3   | 91.7   | CYP4B1     | <a href="#">NM_000779.2</a> | P-450HP                               | cytochrom   | membran     | electron     |
| GI_13435389-S | 119.4  | 130.8  | 120.4  | CYP4F8     | <a href="#">NM_007253.2</a> | CPF8;CYPIVF8                          | fatty acid  | membran     | prostaglan   |
| GI_13435390-S | 109.4  | 119    | 91.8   | CYP4F2     | <a href="#">NM_001082.3</a> | CPF2                                  | monooxyg    | membran     | leukotrien   |
| GI_13435392-A | 891.7  | 878.6  | 758.3  | TIAL1      | <a href="#">NM_003252.2</a> | TCBP;TIAR                             | antimicrob  | lysosome    | induction    |
| GI_13435392-I | 188.2  | 207    | 185.2  | TIAL1      | <a href="#">NM_003252.2</a> | TCBP;TIAR                             | antimicrob  | lysosome    | induction    |
| GI_13435393-I | 119    | 136.2  | 107    | TIAL1      | <a href="#">NM_022333.1</a> | TCBP;TIAR                             | antimicrob  | lysosome    | induction    |
| GI_13435396-I | 181.6  | 168.2  | 186.4  | PHF1       | <a href="#">NM_024165.1</a> | PHF2                                  | transcripti | nucleus     | regulation   |
| GI_13435400-S | 416    | 656.8  | 487.9  | ME1        | <a href="#">NM_002395.2</a> | MES;HUMNDME                           | malate      | cytosol     | tricarboxyli |
| GI_13435401-S | 250.9  | 314    | 277.6  | CCL7       | <a href="#">NM_006273.2</a> | FIC;MARC;MCP3;NC28;MCP-3;SCYA7        | chemokine   | extracellul | chemotaxi    |
| GI_13435403-S | 341.1  | 370.3  | 242.2  | HRH1       | <a href="#">NM_000861.2</a> | H1-R;hisH1                            | histamine   | integral to | G-protein    |
| GI_13435404-S | 118.5  | 116.8  | 101    | HRH2       | <a href="#">NM_022304.1</a> | H2R                                   | histamine   | integral to | G-protein    |
| GI_13442997-S | 136.2  | 155.6  | 129.4  | DPF3       | <a href="#">NM_012074.1</a> | CERD4;cer-d4;FLJ14079                 | zinc ion    | nucleus     | regulation   |
| GI_13443001-S | 418.6  | 350.2  | 275.9  | FLJ22795   | <a href="#">NM_025084.1</a> |                                       |             |             |              |
| GI_13443013-S | 385.9  | 378.1  | 253.7  | ASB9       | <a href="#">NM_024087.1</a> | MGC4954;FLJ20636;DKFZP564L0862        |             |             | intracellula |
| GI_13443017-S | 638.1  | 711.9  | 957.4  | C16orf33   | <a href="#">NM_024571.1</a> | FLJ22940                              |             |             |              |
| GI_13443019-S | 120.6  | 135.4  | 140.8  | ZNF552     | <a href="#">NM_024762.1</a> | FLJ21603                              |             |             |              |
| GI_13443025-S | 262.1  | 311.6  | 223.7  | FLJ10178   | <a href="#">NM_018015.2</a> | FLJ14191                              |             |             |              |
| GI_13443032-A | 1256.8 | 1285.7 | 1553.4 | FLJ20297   | <a href="#">NM_017951.1</a> | FLJ20756                              |             |             |              |
| GI_13443032-I | 230.9  | 293.2  | 238.2  | FLJ20297   | <a href="#">NM_017951.1</a> | FLJ20756                              |             |             |              |
| GI_13446228-S | 331.3  | 401.1  | 374.9  | MESDC1     | <a href="#">NM_022566.1</a> |                                       |             |             |              |
| GI_13449264-S | 901.2  | 1024.5 | 888.1  | KIAA1608   | <a href="#">NM_024820.1</a> | FAM31A;FLJ21129                       |             |             |              |
| GI_13449266-S | 121.1  | 134.4  | 116.8  | FLJ21628   | <a href="#">NM_030613.1</a> |                                       |             | nucleus     |              |
| GI_13449278-S | 109.6  | 116.7  | 116.4  | SLC25A21   | <a href="#">NM_030631.1</a> | ODC;ODC1                              | binding     | mitochond   | transport    |
| GI_13449286-S | 106.8  | 116    | 102    | EGFL8      | <a href="#">NM_030652.1</a> | NG3;C6orf8                            | calcium     |             |              |
| GI_13470085-S | 4521.9 | 4107.4 | 3897.7 | RAI14      | <a href="#">NM_015577.1</a> | RAI13;NORPEG;KIAA1334;DKFZp564G013    |             |             |              |
| GI_13470087-S | 139    | 146.2  | 179.5  | GPR107     | <a href="#">NM_020960.1</a> | LUSTER1;FLJ20998;FLJ22591;KIAA1624;MG |             |             |              |
| GI_13470091-S | 1019.4 | 864.8  | 499.2  | FYCO1      | <a href="#">NM_024513.1</a> | RUFY3;ZFYVE7;FLJ13335                 | zinc ion    |             |              |
| GI_13470093-S | 272.4  | 338.2  | 294.5  | APOL5      | <a href="#">NM_030642.1</a> | APOL-V                                | high-       | cellular_co | lipid        |
| GI_13487903-S | 103.4  | 123.2  | 121.2  | DKFZp434MC | <a href="#">NM_017600.1</a> |                                       |             |             |              |
| GI_13489072-S | 196.1  | 232.8  | 163.6  | EGLN1      | <a href="#">NM_022051.1</a> | PHD2;SM-20;HIFPH2;ZMYND6;C1orf12      | oxidoredu   | cytosol     | protein      |
| GI_13489082-S | 935.4  | 926.2  | 854.6  | C11orf23   | <a href="#">NM_018312.2</a> | SAPL;SAPLa;FLJ11058                   |             |             |              |
| GI_13489098-S | 119.9  | 144.1  | 133.1  | FLJ12242   | <a href="#">NM_024681.1</a> |                                       | voltage-    | membran     | potassium    |
| GI_13489104-S | 384.4  | 460.7  | 419.3  | DEPDC2     | <a href="#">NM_025170.2</a> | DEP.2;FLJ12987;FLJ14017               | protein     |             | intracellula |
| GI_13491165-S | 1638.7 | 1911.8 | 1617.7 | PUM1       | <a href="#">NM_014676.1</a> | PUMH;PUMH1;PUM1;KIAA0099              | RNA         |             |              |
| GI_13491167-S | 1210.6 | 1101.7 | 990.9  | PUM2       | <a href="#">NM_015317.1</a> | PUMH2;PUM2;KIAA0235                   |             |             |              |
| GI_13491171-I | 162.6  | 164.3  | 167.4  | PRX        | <a href="#">NM_020956.1</a> | CMT4F;KIAA1620                        | molecular   | membran     | nerve        |
| GI_13514808-S | 87.9   | 94     | 95.8   | DDX3Y      | <a href="#">NM_004660.2</a> | DBY                                   | ATP         |             |              |
| GI_13514812-I | 1598.6 | 1844   | 1265.2 | DDX3X      | <a href="#">NM_001356.2</a> | DBX;DDX3;HLP2;DDX14                   | ATP         |             |              |

|               |        |        |        |            |                             |                                |             |              |             |
|---------------|--------|--------|--------|------------|-----------------------------|--------------------------------|-------------|--------------|-------------|
| GI_13514816-A | 204.4  | 272.4  | 251.9  | DDX3X      | <a href="#">NM_024005.1</a> | DBX;DDX3;HLP2;DDX14            | ATP         |              |             |
| GI_13514816-I | 114.3  | 146.7  | 151    | DDX3X      | <a href="#">NM_024005.1</a> | DBX;DDX3;HLP2;DDX14            | ATP         |              |             |
| GI_13514819-I | 123.9  | 126.4  | 125.7  | DHX9       | <a href="#">NM_001357.2</a> | LKP;RHA;DDX9;NDHII;NDH II      | ATP         | cytoplasm    |             |
| GI_13514821-A | 657.9  | 802.9  | 765.4  | DHX9       | <a href="#">NM_030588.1</a> | LKP;RHA;DDX9;NDHII;NDH II      | ATP         | cytoplasm    |             |
| GI_13514826-S | 3991.3 | 4877   | 4553.9 | DDX5       | <a href="#">NM_004396.2</a> | P68;HLR1;G17P1;HUMP68          | ATP         | nucleus      | cell growth |
| GI_13514830-S | 1050.5 | 982.5  | 904.3  | DDX10      | <a href="#">NM_004398.2</a> | HRH-J8                         | RNA         |              |             |
| GI_13518012-A | 260.4  | 326.3  | 171.1  | MJD        | <a href="#">NM_030660.1</a> | ATX3;MJD1;SCA3                 |             | nucleoplas   | nucleotide- |
| GI_13518014-I | 84.7   | 82.8   | 78.5   | DDX4       | <a href="#">NM_024415.1</a> | VASA                           | nucleic     |              | developm    |
| GI_13518016-I | 93.9   | 88.6   | 88.4   | WNT2B      | <a href="#">NM_004185.2</a> | WNT13;XWNT2                    | signal      | extracellul  | embryoge    |
| GI_13518018-I | 98.4   | 100.2  | 85.3   | MJD        | <a href="#">NM_004993.2</a> | ATX3;MJD1;SCA3                 |             | nucleoplas   | nucleotide- |
| GI_13518020-A | 108.5  | 121.6  | 106.3  | WNT2B      | <a href="#">NM_024494.1</a> | WNT13;XWNT2                    | signal      | extracellul  | embryoge    |
| GI_13518020-I | 163.8  | 213.5  | 186.2  | WNT2B      | <a href="#">NM_024494.1</a> | WNT13;XWNT2                    | signal      | extracellul  | embryoge    |
| GI_13518022-S | 92.2   | 96.2   | 87.3   | OPCML      | <a href="#">NM_002545.2</a> | OPCM;OBCAM                     | opioid      | integral to  | neuronal    |
| GI_13518024-S | 150.6  | 172.8  | 149.8  | HRG        | <a href="#">NM_000412.2</a> | HPRG;HRGP                      | plasma      | extracellul  |             |
| GI_13518025-S | 617.2  | 762.3  | 570.1  | LIMS1      | <a href="#">NM_004987.2</a> | PINCH;PINCH1                   |             |              | cell aging  |
| GI_13518027-S | 235.3  | 205.9  | 138.4  | BFSP1      | <a href="#">NM_001195.2</a> | CP94;CP115;LIFL-H;FILENSIN     | structural  | intermedia   | RNA         |
| GI_13518031-S | 723.1  | 742.9  | 615.4  | GLI3       | <a href="#">NM_000168.2</a> | PHS;GCPS;PAPA;PAPB;PAP-        | transcripti | cytoplasm    | protein-    |
| GI_13518035-S | 83.2   | 98.2   | 97.2   | MATN1      | <a href="#">NM_002379.2</a> | CMP;CRTM                       | extracellul | extracellul  | cartilage   |
| GI_13518036-I | 95.4   | 124.7  | 90.4   | MATN2      | <a href="#">NM_002380.2</a> |                                |             |              |             |
| GI_13518038-A | 246.9  | 588.9  | 258.7  | MATN2      | <a href="#">NM_030583.1</a> |                                |             |              |             |
| GI_13518040-S | 153.1  | 188.2  | 171.8  | MATN3      | <a href="#">NM_002381.2</a> | HOA;EDM5                       | extracellul | extracellul  | skeletal    |
| GI_13518226-A | 137.2  | 169.2  | 132.7  | GLI2       | <a href="#">NM_005270.2</a> | THP2                           | transcripti | nucleus      | histogene   |
| GI_13518227-S | 811.1  | 866.1  | 843.9  | MCCC1      | <a href="#">NM_020166.2</a> | MCCA;MCC-B                     | biotin      | mitochond    | biotin      |
| GI_13540470-S | 184.3  | 189.4  | 162.5  | TCF7L2     | <a href="#">NM_030756.1</a> | TCF4;TCF-4                     | RNA         | nucleus      | oncogene    |
| GI_13540472-S | 3101   | 3834.1 | 3197.4 | TCP1       | <a href="#">NM_030752.1</a> | CCT1;Ccta;D6S230E              | chaperone   | cytosol      | protein     |
| GI_13540481-S | 98.6   | 116.1  | 112.9  | C14orf102  | <a href="#">NM_017970.1</a> | FLJ10008;FLJ14051              |             |              |             |
| GI_13540489-S | 122.4  | 133.7  | 133.1  | BACH2      | <a href="#">NM_021813.1</a> |                                | protein     | nucleus      | regulation  |
| GI_13540500-S | 110.8  | 105.7  | 111.2  | ZNF442     | <a href="#">NM_030824.1</a> | FLJ14356                       | nucleic     | intracellula | regulation  |
| GI_13540508-S | 117.2  | 139.5  | 120.6  | MKRN4      | <a href="#">NM_030757.1</a> | RNF64;ZNF-Xp;ZNF127L1          | nucleic     |              |             |
| GI_13540512-S | 153.4  | 165.7  | 123.3  | OSBP2      | <a href="#">NM_030758.1</a> | ORP4;ORP-4;OSBPL1;KIAA1664     |             | membran      | lipid       |
| GI_13540514-S | 984.6  | 925.2  | 875.5  | NRBF2      | <a href="#">NM_030759.1</a> | COPR1;COPR2;NRBF-2;FLJ30395    |             |              |             |
| GI_13540520-S | 144.3  | 174.4  | 227.7  | BHLHB3     | <a href="#">NM_030762.1</a> | DEC2;SHARP1;SHARP-1            | transcripti | nucleus      | regulation  |
| GI_13540522-S | 187.5  | 223.2  | 186.8  | NSBP1      | <a href="#">NM_030763.1</a> |                                | chromatin   | chromatin    | regulation  |
| GI_13540528-I | 128.1  | 139.8  | 121.7  | BCL2L14    | <a href="#">NM_030766.1</a> | BCLG                           |             |              |             |
| GI_13540532-S | 131.6  | 155.4  | 128.8  | NPL        | <a href="#">NM_030769.1</a> | NPL1;c112;C1orf13              |             |              |             |
| GI_13540534-S | 162.2  | 204.6  | 181.1  | TMPRSS5    | <a href="#">NM_030770.1</a> | SPINESIN                       | trypsin     | integral to  | proteolysis |
| GI_13540544-S | 157.1  | 163.2  | 143    | ZBP1       | <a href="#">NM_030776.1</a> | DLM1;DLM-1;C20ORF183;dJ718J7.3 | DNA         | cellular_co  | biological_ |
| GI_13540554-S | 698.6  | 548.2  | 596.9  | PTDSS2     | <a href="#">NM_030783.1</a> | PSS2                           |             |              | phosphati   |
| GI_13540556-S | 164.1  | 146.4  | 129.9  | GPR63      | <a href="#">NM_030784.1</a> | PSP24B;PSP24(beta)             | molecular   | integral to  | G-protein   |
| GI_13540558-S | 176.6  | 215.7  | 201.3  | RSHL1      | <a href="#">NM_030785.1</a> | RSP4;RSP6                      | ferric iron | extracellul  | iron ion    |
| GI_13540560-S | 170.5  | 419.5  | 445.6  | SYNCOILIN  | <a href="#">NM_030786.1</a> | SYNC                           |             |              |             |
| GI_13540562-S | 89.2   | 92.7   | 84.4   | FHR5       | <a href="#">NM_030787.1</a> | FHR-5                          | compleme    | extracellul  | compleme    |
| GI_13540575-S | 487.7  | 392.8  | 399.5  | TDRD3      | <a href="#">NM_030794.1</a> | FLJ21007                       | nucleic     | nucleus      | regulation  |
| GI_13540579-S | 305.8  | 443    | 417.3  | DKFZP566A1 | <a href="#">NM_030797.1</a> | FLJ11080                       |             |              |             |

|               |        |        |        |            |                             |                                        |                    |                         |
|---------------|--------|--------|--------|------------|-----------------------------|----------------------------------------|--------------------|-------------------------|
| GI_13540585-S | 586.4  | 577    | 526.2  | DKFZP564O1 | <a href="#">NM_030800.1</a> |                                        |                    |                         |
| GI_13540593-S | 470.5  | 526.2  | 446.4  | LMAN2L     | <a href="#">NM_030805.1</a> | VIPL;MGC11139;DKFZp564L2423            | sugar              | endoplas protein        |
| GI_13540601-S | 302.9  | 309.1  | 265.1  | C12orf22   | <a href="#">NM_030809.1</a> | C12ORF2;TAIP-12                        |                    |                         |
| GI_13540609-S | 216.2  | 263.5  | 285.4  | DKFZP566D1 | <a href="#">NM_030816.1</a> | dJ677H15.3                             |                    |                         |
| GI_13540611-S | 114.4  | 206.4  | 107.1  | DKFZP434F0 | <a href="#">NM_030817.1</a> |                                        |                    |                         |
| GI_13562087-S | 106.9  | 113.7  | 109.5  | LRRC3      | <a href="#">NM_030891.1</a> | C21orf102                              |                    |                         |
| GI_13562103-S | 106.2  | 109    | 99.8   | OR3A3      | <a href="#">NM_012373.1</a> | OR3A6;OR3A7;OR17-16;OR17-137;OR17-     | receptor           | integral to signal      |
| GI_13569839-S | 273    | 216.7  | 153.2  | LRP16      | <a href="#">NM_014067.2</a> |                                        |                    |                         |
| GI_13569844-S | 1070.2 | 860.8  | 840.4  | MYNN       | <a href="#">NM_018657.2</a> | SBBIZ1                                 | zinc ion           | transcripti             |
| GI_13569847-I | 164.4  | 184.7  | 160.5  | TBRG4      | <a href="#">NM_030900.1</a> | CPR2;KIAA0948                          |                    | cell cycle              |
| GI_13569857-S | 863.8  | 656.7  | 600.1  | FLJ14129   | <a href="#">NM_030895.1</a> |                                        | DNA                | nucleus regulation      |
| GI_13569859-S | 168.5  | 187.6  | 173.1  | CD1E       | <a href="#">NM_030893.1</a> | HSCDIEL                                | defense/i          | integral to immune      |
| GI_13569863-S | 101.8  | 88.4   | 87     | CDADC1     | <a href="#">NM_030911.1</a> | NYD-SP15                               |                    |                         |
| GI_13569865-S | 3045.8 | 2244.1 | 1946.8 | TRIM8      | <a href="#">NM_030912.1</a> | GERP;RNF27                             | zinc ion           | kinesin biological_     |
| GI_13569869-S | 1936.7 | 1837   | 2183.3 | C9orf74    | <a href="#">NM_030914.1</a> | MGC2668                                |                    |                         |
| GI_13569871-S | 239    | 667.9  | 502.2  | LBH        | <a href="#">NM_030915.1</a> | DKFZP566J091                           |                    |                         |
| GI_13569886-S | 104.5  | 117.4  | 95.4   | FLJ12577   | <a href="#">NM_030925.1</a> |                                        |                    |                         |
| GI_13569888-S | 372.6  | 502    | 527.9  | DC-TM4F2   | <a href="#">NM_030927.1</a> | MGC11352                               |                    |                         |
| GI_13569896-S | 135.7  | 156.2  | 136.7  | C1orf14    | <a href="#">NM_030933.1</a> | GE36                                   |                    |                         |
| GI_13569912-S | 197.4  | 211.2  | 227.1  | LOC81691   | <a href="#">NM_030941.1</a> | DKFZp434J0315                          |                    |                         |
| GI_13569914-S | 117.9  | 111.3  | 110.1  | AMN        | <a href="#">NM_030943.1</a> |                                        |                    | integral to developm    |
| GI_13569916-S | 85.8   | 82.3   | 79.3   | C15orf5    | <a href="#">NM_030944.1</a> |                                        |                    |                         |
| GI_13569918-A | 93.3   | 102.3  | 99.7   | C1QTNF3    | <a href="#">NM_030945.1</a> | CTRP3;CORS26;FLJ37576                  |                    | microfibril             |
| GI_13569918-I | 198.2  | 232.8  | 217.7  | C1QTNF3    | <a href="#">NM_030945.1</a> | CTRP3;CORS26;FLJ37576                  |                    | microfibril             |
| GI_13569921-S | 141.8  | 131.7  | 108.5  | SNARK      | <a href="#">NM_030952.1</a> | DKFZP434J037                           | protein-           | protein                 |
| GI_13569927-S | 108.8  | 123.5  | 105.3  | ADAMTS12   | <a href="#">NM_030955.1</a> |                                        | zinc ion           | extracellul proteolysis |
| GI_13569929-S | 93.6   | 100.6  | 98.2   | TLR10      | <a href="#">NM_030956.1</a> |                                        | interleukin-       | integral to immune      |
| GI_13569931-S | 124.1  | 142.1  | 116.2  | SLCO5A1    | <a href="#">NM_030958.1</a> | OATP-J;OATP5A1;OATPRP4;SLC21A15        | transporte         | integral to transport   |
| GI_13569937-S | 81.1   | 89.9   | 95.7   | SIAT7E     | <a href="#">NM_030965.1</a> | MGC3184;ST6GalNAcV                     | sialyltransf Golgi | protein                 |
| GI_13569939-S | 113.7  | 112.8  | 95.6   | KRTAP1-3   | <a href="#">NM_030966.1</a> | KAP1.2;KAP1.3;KAP1.9;KAP1.8A;KAP1.8B;K |                    |                         |
| GI_13569947-S | 984.7  | 1050.4 | 1288.7 | TCBAP0758  | <a href="#">NM_030973.1</a> | P78;DKFZp434K0512                      |                    |                         |
| GI_13569955-S | 2599.1 | 2427.9 | 2074.1 | ARPC5L     | <a href="#">NM_030978.1</a> | ARC16-2;MGC3038                        |                    |                         |
| GI_13569959-S | 334.7  | 350.7  | 376.7  | FLJ12671   | <a href="#">NM_030980.1</a> |                                        | exonuclea          | intracellula            |
| GI_13569961-S | 274.2  | 328.8  | 339.6  | RAB1B      | <a href="#">NM_030981.1</a> |                                        |                    |                         |
| GI_13591857-S | 826.7  | 900.6  | 722.4  | PADI1      | <a href="#">NM_013358.1</a> | PDI;PDI1;HPAD10                        | protein-           | protein                 |
| GI_13624324-S | 135.9  | 152.5  | 134.1  | OR7C2      | <a href="#">NM_012377.1</a> | OR7C3;OR19-18;CIT-HSP-87M17            | olfactory          | integral to chemosen    |
| GI_13624328-S | 101.4  | 128.5  | 110.8  | OR2W1      | <a href="#">NM_030903.1</a> | hs6M1-15                               | olfactory          | integral to olfaction   |
| GI_13624330-S | 97.8   | 121.2  | 103.6  | OR2J2      | <a href="#">NM_030905.1</a> | OR6-8;hs6M1-6;dJ80I19.4                | olfactory          | integral to olfaction   |
| GI_13654234-A | 378.9  | 545    | 700.5  | RGS20      | <a href="#">NM_003702.2</a> | RGSZ1;ZGAP1                            | protein            | peripheral regulation   |
| GI_13654273-S | 866.7  | 819.2  | 1027.2 | DKFZP566J2 | <a href="#">NM_031208.1</a> |                                        |                    |                         |
| GI_13654275-S | 342.3  | 288.5  | 302.2  | QTRT1      | <a href="#">NM_031209.1</a> | TGT                                    | queuine            | ribosome tRNA           |
| GI_13654285-S | 164.1  | 190.9  | 178.9  | AF311304   | <a href="#">NM_031214.1</a> |                                        |                    |                         |
| GI_13654291-S | 102    | 112.4  | 99.8   | ZNF505     | <a href="#">NM_031218.1</a> | FLJ12488                               | metallope          | nucleus proteolysis     |
| GI_13654295-S | 115.5  | 115.3  | 115.7  | PITPNM3    | <a href="#">NM_031220.1</a> | NIR1;RDGBA3                            | phosphati          | integral to transmem    |

|               |        |        |        |            |                             |                                      |            |                       |
|---------------|--------|--------|--------|------------|-----------------------------|--------------------------------------|------------|-----------------------|
| GI_13676856-S | 123.4  | 161.2  | 132.9  | HSPA2      | <a href="#">NM_021979.2</a> |                                      | chaperone  | male                  |
| GI_13677215-A | 139    | 143.5  | 141.6  | PTPRO      | <a href="#">NM_030668.1</a> | PTPU2;GLEPP1;PTP-U2                  | transmem   | integral to protein   |
| GI_13699810-I | 102.9  | 115.3  | 99.4   | WHSC1L1    | <a href="#">NM_023034.1</a> | NSD3;FLJ20353                        |            |                       |
| GI_13699812-A | 112.5  | 100.9  | 107.4  | WHSC1L1    | <a href="#">NM_017778.2</a> | NSD3;FLJ20353                        |            |                       |
| GI_13699812-I | 782.4  | 847.6  | 637.1  | WHSC1L1    | <a href="#">NM_017778.2</a> | NSD3;FLJ20353                        |            |                       |
| GI_13699815-S | 118.9  | 128.6  | 119.9  | CYP2C18    | <a href="#">NM_000772.1</a> | CPCI;CYP2C;CYP2C17;P450IIC17;P450-   | monooxyg   | membran electron      |
| GI_13699817-S | 242.1  | 280    | 238.2  | CYP2C9     | <a href="#">NM_000771.2</a> | CPC9;CYP2C10;P450IIC9;P450 MP-4;P450 |            |                       |
| GI_13699820-S | 3826.2 | 4902.5 | 4157.7 | NDUFA1     | <a href="#">NM_004541.2</a> | MWFE;CI-MWFE                         | NADH       | NADH energy           |
| GI_13699821-S | 118.8  | 157.1  | 146    | NDUFA5     | <a href="#">NM_005000.2</a> | B13;NUFM;UQOR13;FLJ12147;CI-13KD-B   | NADH       | NADH                  |
| GI_13699823-S | 279.5  | 297.3  | 360.6  | KIF11      | <a href="#">NM_004523.2</a> | EG5;HKSP;KNSL1;TRIP5                 | microtubul | kinesin mitotic       |
| GI_13699825-I | 115.8  | 130.4  | 110    | KIF25      | <a href="#">NM_030615.1</a> | KNSL3                                | microtubul | kinesin organelle     |
| GI_13699827-A | 78.8   | 86.1   | 92     | KIF25      | <a href="#">NM_005355.2</a> | KNSL3                                | microtubul | kinesin organelle     |
| GI_13699829-I | 87.8   | 76.4   | 98     | MATN4      | <a href="#">NM_003833.2</a> | HE6WCR54                             |            | extracellul           |
| GI_13699832-S | 1345   | 892.5  | 1066.9 | KIF2C      | <a href="#">NM_006845.2</a> | MCAK;KNSL6                           | microtubul | kinesin centromer     |
| GI_13699835-A | 173.7  | 159.9  | 107.2  | MATN4      | <a href="#">NM_030592.1</a> | HE6WCR54                             |            | extracellul           |
| GI_13699837-S | 184.8  | 222.8  | 176.4  | CYP2E1     | <a href="#">NM_000773.2</a> | CPE1;CYP2E;P450-J;P450C2E            | monooxyg   | membran electron      |
| GI_13699838-I | 101.3  | 91.2   | 90.8   | TBXAS1     | <a href="#">NM_001061.2</a> | TS;TXS;CYP5;THAS;TXAS;CYP5A1         |            | blood                 |
| GI_13699839-A | 91.5   | 95.9   | 99.2   | TBXAS1     | <a href="#">NM_030984.1</a> | TS;TXS;CYP5;THAS;TXAS;CYP5A1         |            | blood                 |
| GI_13699841-S | 110.1  | 105.8  | 111.4  | TPS1       | <a href="#">NM_003293.2</a> | TPS2;alpha II                        | serine-    | defense               |
| GI_13699860-S | 194.2  | 216.2  | 187.1  | SLC22A14   | <a href="#">NM_004803.2</a> | OCTL2;OCTL4;ORCTL4                   | organic    | membran small         |
| GI_13699861-S | 262.5  | 382.7  | 370.8  | HYOU1      | <a href="#">NM_006389.2</a> | ORP150                               | ATP        | endoplas response     |
| GI_13699866-S | 2677.3 | 1975.2 | 1990.6 | MAP1LC3B   | <a href="#">NM_022818.2</a> | MAP1A/1BLC3                          |            | microtubul            |
| GI_13699867-S | 447.1  | 461.9  | 440.9  | MTHFD1     | <a href="#">NM_005956.2</a> | MTHFC;MTHFD                          | methylene  | mitochond amino       |
| GI_13699869-S | 4119.2 | 2487.9 | 1164.1 | MTHFD2     | <a href="#">NM_006636.2</a> | NMDMC                                | methylene  | mitochond one-        |
| GI_13702710-S | 96.3   | 98.3   | 101.8  | PSG2       | <a href="#">NM_031246.1</a> | PSBG2;PSGGB                          | molecular  | cellular_co pregnancy |
| GI_13775161-S | 131.6  | 133    | 132.7  | OR7A17     | <a href="#">NM_030901.1</a> | HTPCRX19                             | olfactory  | integral to olfaction |
| GI_13775163-S | 186.6  | 218.4  | 213.8  | MGC3771    | <a href="#">NM_030970.1</a> | MGC1912                              |            |                       |
| GI_13775165-S | 117.7  | 153.4  | 175    | MGC5384    | <a href="#">NM_030972.1</a> |                                      |            |                       |
| GI_13775177-S | 102.2  | 107    | 119.4  | TEX13B     | <a href="#">NM_031273.1</a> |                                      |            |                       |
| GI_13775183-S | 107.1  | 102    | 94.5   | TEX11      | <a href="#">NM_031276.1</a> |                                      |            |                       |
| GI_13775185-I | 97.5   | 100.4  | 113.2  | RNF17      | <a href="#">NM_031277.1</a> | Mmip-2                               |            |                       |
| GI_13775195-S | 5556.3 | 6148   | 3690.7 | PP1057     | <a href="#">NM_031285.1</a> |                                      |            |                       |
| GI_13775201-S | 348.9  | 382    | 336    | HMGA1L4    | <a href="#">NM_031288.1</a> | PAPA-1;HMGIYL4                       |            |                       |
| GI_13775203-A | 101.5  | 109.8  | 98.3   | GSG1       | <a href="#">NM_031289.1</a> | MGC3146                              |            |                       |
| GI_13775203-I | 147    | 179.5  | 164.1  | GSG1       | <a href="#">NM_031289.1</a> | MGC3146                              |            |                       |
| GI_13775205-S | 95     | 101    | 99.5   | DKFZP434K1 | <a href="#">NM_031290.1</a> |                                      |            |                       |
| GI_13775207-S | 138.7  | 159.7  | 146.6  | DKFZP434N1 | <a href="#">NM_031291.1</a> |                                      | binding    | integral to transport |
| GI_13775209-S | 168.9  | 152.7  | 131    | DKFZP434G1 | <a href="#">NM_031292.1</a> |                                      | molecular  |                       |
| GI_13775211-S | 99.6   | 94.2   | 88.4   | PMFBP1     | <a href="#">NM_031293.1</a> | DKFZP434G131                         |            |                       |
| GI_13775219-S | 718.6  | 638.9  | 803.4  | MGC2963    | <a href="#">NM_031298.1</a> |                                      |            |                       |
| GI_13775223-S | 394    | 647    | 535    | PSFL       | <a href="#">NM_031301.1</a> | APH1B;APH-1B;DKFZp564D0372           |            | integral to           |
| GI_13775229-S | 116.5  | 124.3  | 105.7  | DKFZP564B1 | <a href="#">NM_031305.1</a> |                                      |            |                       |
| GI_13775231-S | 88.2   | 98.1   | 84     | DKFZP564B1 | <a href="#">NM_031306.1</a> |                                      | nucleic    |                       |
| GI_13775237-S | 236    | 282.3  | 235.8  | PLVAP      | <a href="#">NM_031310.1</a> | PV1;FELS;PV-1;gp68                   |            |                       |

|               |        |        |        |             |                             |                              |             |                         |
|---------------|--------|--------|--------|-------------|-----------------------------|------------------------------|-------------|-------------------------|
| GI_13775594-S | 137.5  | 124.9  | 130.5  | TPSB1       | <a href="#">NM_003294.2</a> | TPS1;TPS2;beta I;trypase-II  | serine-     | proteolysis             |
| GI_13775596-S | 458.7  | 552.6  | 493.3  | TPSB2       | <a href="#">NM_024164.2</a> | beta II                      |             |                         |
| GI_13775598-S | 395.5  | 390.1  | 402.6  | SIRT1       | <a href="#">NM_012238.3</a> | SIR2L1                       | NAD ADP-    | chromatin chromatin     |
| GI_13775601-A | 201.4  | 216.5  | 203.4  | SIRT2       | <a href="#">NM_030593.1</a> | SIR2L;SIR2L2                 | NAD ADP-    | cytoplasm protein       |
| GI_13775603-S | 454.3  | 489.6  | 477.2  | SIRT3       | <a href="#">NM_012239.3</a> | SIR2L3                       | NAD ADP-    | chromatin protein       |
| GI_13786122-S | 272.4  | 209.6  | 176.9  | TCF7L1      | <a href="#">NM_031283.1</a> | TCF3;TCF-3                   | transcripti | nucleus establish       |
| GI_13786128-S | 109    | 122.7  | 107.6  | RAB33B      | <a href="#">NM_031296.1</a> | DKFZP434G099                 | GTP         | Golgi small             |
| GI_13787185-S | 81.1   | 83.3   | 88.3   | CYP7A1      | <a href="#">NM_000780.2</a> | CP7A;CYP7                    | monooxyg    | microsom bile acid      |
| GI_13787188-A | 211.1  | 267.3  | 229.5  | CYP2C8      | <a href="#">NM_000770.2</a> | CPC8;P450 MP-12/MP-20        | monooxyg    | membran electron        |
| GI_13787190-S | 79.1   | 92.4   | 87     | CYP7B1      | <a href="#">NM_004820.2</a> | CP7B                         | oxysterol   | microsom bile acid      |
| GI_13787191-S | 510.9  | 616.5  | 566.6  | ALPI        | <a href="#">NM_001631.2</a> | IAP                          |             |                         |
| GI_13787192-S | 178    | 218.5  | 188.4  | ALPL        | <a href="#">NM_000478.2</a> | HOPS;TNAP;TNSALP;AP-TNAP     | magnesi     | integral to skeletal    |
| GI_13787194-S | 167.1  | 202.4  | 139.7  | ALPP        | <a href="#">NM_001632.2</a> | ALP;PLAP                     |             | peripheral              |
| GI_13787208-S | 4460   | 4122.2 | 3349.3 | DDX21       | <a href="#">NM_004728.1</a> | GUA;GURDB;RH-II/GU;RH-II/GuA | ATP         | nucleolus               |
| GI_13787213-A | 196.7  | 170.2  | 158.4  | SIRT5       | <a href="#">NM_012241.2</a> | SIR2L5                       | NAD ADP-    | chromatin               |
| GI_13787213-I | 589.7  | 439.1  | 443    | SIRT5       | <a href="#">NM_012241.2</a> | SIR2L5                       | NAD ADP-    | chromatin               |
| GI_13787214-I | 720.1  | 590.6  | 524.3  | SIRT5       | <a href="#">NM_031244.1</a> | SIR2L5                       | NAD ADP-    | chromatin               |
| GI_13787216-S | 111.3  | 110.5  | 112.4  | FAT2        | <a href="#">NM_001447.1</a> | CDHF8;HFAT2;MEGF1            | calcium     | integral to homophili   |
| GI_13899218-S | 533.3  | 614.5  | 491.2  | GABARAPL1   | <a href="#">NM_031412.1</a> | GEC1                         | receptor    |                         |
| GI_13899220-S | 92.7   | 113.7  | 108.6  | MLZE        | <a href="#">NM_031415.1</a> |                              |             |                         |
| GI_13899222-S | 209.2  | 263.2  | 248.5  | C18orf2     | <a href="#">NM_031416.1</a> |                              | molecular   | cellular_co biological_ |
| GI_13899226-S | 89.3   | 94.1   | 95.8   | TMEM16C     | <a href="#">NM_031418.1</a> | C11orf25;GENX-3947           |             |                         |
| GI_13899228-S | 314.5  | 251.3  | 192.3  | MAIL        | <a href="#">NM_031419.1</a> | IKBZ;INAP                    |             |                         |
| GI_13899232-S | 105.7  | 126.7  | 103.3  | DKFZP434HC  | <a href="#">NM_031421.1</a> |                              |             |                         |
| GI_13899234-S | 113.9  | 128.7  | 112.8  | CHST9       | <a href="#">NM_031422.1</a> | GALNAC4ST-2                  | N-          | cellular_co glycosami   |
| GI_13899238-S | 830.2  | 1054.4 | 1142.4 | MGC10812    | <a href="#">NM_031425.1</a> |                              |             |                         |
| GI_13899240-S | 245.8  | 265    | 170.8  | C9orf58     | <a href="#">NM_031426.1</a> | IBA2;FLJ12783                | calcium     |                         |
| GI_13899242-S | 120.9  | 137.2  | 113.5  | C14orf168   | <a href="#">NM_031427.1</a> | MGC12435                     |             |                         |
| GI_13899246-S | 326.3  | 430.5  | 382.8  | RTBDN       | <a href="#">NM_031429.1</a> |                              |             |                         |
| GI_13899248-S | 193.6  | 193.7  | 202.6  | RILP        | <a href="#">NM_031430.1</a> |                              | transporte  | membran transport       |
| GI_13899252-S | 718.9  | 929    | 862.3  | UCK1        | <a href="#">NM_031432.1</a> |                              |             |                         |
| GI_13899254-S | 231.5  | 268.6  | 259.1  | MFRP        | <a href="#">NM_031433.1</a> | FLJ30570                     | transmem    | membran developm        |
| GI_13899258-S | 140.1  | 162.4  | 108.4  | DKFZP564I04 | <a href="#">NM_031435.1</a> |                              | DNA         |                         |
| GI_13899262-S | 308    | 370.1  | 297    | TMEM7       | <a href="#">NM_031440.1</a> | LTM1                         |             | integral to             |
| GI_13899280-S | 1157   | 800.2  | 758    | MGC13033    | <a href="#">NM_031447.1</a> |                              |             |                         |
| GI_13899294-S | 117.2  | 143.7  | 130.1  | MS4A8B      | <a href="#">NM_031457.1</a> | MS4A4;4SPAN4                 | transporte  | integral to transport   |
| GI_13899296-S | 331.4  | 484.5  | 330.6  | BAL         | <a href="#">NM_031458.1</a> |                              |             | nucleus                 |
| GI_13899304-S | 1700.2 | 3848.5 | 2377   | CD99L2      | <a href="#">NM_031462.1</a> | MIC2L1;DKFZp761H2024         |             |                         |
| GI_13899310-S | 177.7  | 182.6  | 161.3  | MGC13204    | <a href="#">NM_031465.1</a> |                              |             |                         |
| GI_13899314-S | 145.2  | 166.1  | 134    | CALN1       | <a href="#">NM_031468.1</a> |                              | calcium     |                         |
| GI_13899316-S | 589    | 386.6  | 387.6  | SH3BGRL2    | <a href="#">NM_031469.1</a> |                              |             | nucleus                 |
| GI_13899326-S | 231.7  | 261.2  | 248.7  | NRIP2       | <a href="#">NM_031474.1</a> | DKFZP761G1913                | aspartic-   | nucleus proteolysis     |
| GI_13899328-S | 124.8  | 156.5  | 135.2  | ESPN        | <a href="#">NM_031475.1</a> | DKFZP434A196                 |             |                         |
| GI_13899331-S | 234.6  | 331.9  | 645.2  | DKFZP434B0  | <a href="#">NM_031476.1</a> |                              |             | extracellul             |

|               |         |        |        |          |                             |                                          |              |             |            |            |
|---------------|---------|--------|--------|----------|-----------------------------|------------------------------------------|--------------|-------------|------------|------------|
| GI_13899341-S | 271.9   | 327.5  | 297    | SLC25A18 | <a href="#">NM_031481.1</a> | GC2                                      | binding      | mitochond   | transport  |            |
| GI_13899343-S | 1356.6  | 1761.2 | 2165.5 | MRVLDC1  | <a href="#">NM_031484.1</a> | GB14;MARVD1;MGC4415;FLJ22343;FLJ234      | transporte   | membran     | transport  |            |
| GI_13899351-S | 148.6   | 189.1  | 161.5  | RBP5     | <a href="#">NM_031491.1</a> | CRBP3;CRBP3III;CRBP-III                  | intracellula | cytoplasm   | transport  |            |
| GI_13904851-S | 147.2   | 200.6  | 175.2  | CYP3A4   | <a href="#">NM_017460.3</a> | HLP;CP33;CP34;CYP3A;NF-                  | monooxyg     | microsom    | lipid      |            |
| GI_13904852-S | 346.2   | 431.6  | 369.6  | CYP11B1  | <a href="#">NM_000497.2</a> | FHI;CPN1;CYP11B;P450C11                  | steroid 11-  | mitochond   | steroid    |            |
| GI_13904854-S | 298.3   | 342.9  | 285    | CYP17A1  | <a href="#">NM_000102.2</a> | CPT7;CYP17;S17AH;P450C17                 | steroid 17-  | microsom    | sex        |            |
| GI_13904855-S | 100.5   | 93.6   | 104.6  | CYP11B2  | <a href="#">NM_000498.2</a> | CPN2;ALDOS;CYP11B;CYP11BL;P-             | steroid 11-  | membran     | glucocorti |            |
| GI_13904857-A | 113.7   | 135    | 127.1  | CYP19A1  | <a href="#">NM_000103.2</a> | ARO;ARO1;CPV1;CYAR;CYP19;P-              | aromatase    | microsom    | steroid    |            |
| GI_13904859-I | 81.8    | 90.5   | 90.8   | CYP19A1  | <a href="#">NM_031226.1</a> | ARO;ARO1;CPV1;CYAR;CYP19;P-              | aromatase    | microsom    | steroid    |            |
| GI_13904862-S | 80.1    | 76.7   | 88.4   | CYP24A1  | <a href="#">NM_000782.2</a> | CP24;CYP24;P450-CC24                     | monooxyg     | mitochond   | electron   |            |
| GI_13904863-S | 103.1   | 129    | 101    | CYP27A1  | <a href="#">NM_000784.2</a> | CTX;CP27;CYP27                           | steroid      | membran     | electron   |            |
| GI_13904864-S | 257.4   | 310.4  | 295.4  | CYP27B1  | <a href="#">NM_000785.2</a> | VDR;CP2B;CYP1;PDDR;VDD1;VDDR;VDDR        | cytochrom    | membran     | vitamin    |            |
| GI_13904867-S | 28687   | 25804  | 20903  | RPS10    | <a href="#">NM_001014.2</a> |                                          | structural   | cytosolic   | protein    |            |
| GI_13904868-S | 23007.7 | 20324  | 15684  | RPS29    | <a href="#">NM_001032.2</a> |                                          | structural   | cytosolic   | regulation |            |
| GI_13904869-S | 45065.7 | 46449  | 39609  | RPS5     | <a href="#">NM_001009.2</a> |                                          | structural   | cytosolic   | protein    |            |
| GI_13929211-S | 108.9   | 120.2  | 114.2  | OR2A4    | <a href="#">NM_030908.1</a> | OR2A10                                   | olfactory    | integral to | olfaction  |            |
| GI_13929427-S | 2326.2  | 1981   | 1495.9 | CYP51A1  | <a href="#">NM_000786.2</a> | LDM;CP51;CYP51;CYPL1;P450L1;P450-        | sterol 14-   | integral to | electron   |            |
| GI_13929428-S | 194.6   | 227.8  | 204.7  | CYP8B1   | <a href="#">NM_004391.1</a> | CP8B;CYP12                               | sterol 12-   | microsom    | electron   |            |
| GI_13929430-S | 96.4    | 97.8   | 92.4   | CCR8     | <a href="#">NM_005201.2</a> | CY6;TER1;CKRL1;CKR-                      | chemokin     | integral to | cytosolic  |            |
| GI_13929435-A | 571.4   | 683.7  | 606    | CABP2    | <a href="#">NM_031204.1</a> |                                          | calcium      |             | signal     |            |
| GI_13929441-A | 66      | 77.1   | 70.8   | MUCDHL   | <a href="#">NM_017717.3</a> | MU-PCDH;FLJ20219                         |              |             |            |            |
| GI_13929441-I | 112.5   | 134.6  | 121.4  | MUCDHL   | <a href="#">NM_017717.3</a> | MU-PCDH;FLJ20219                         |              |             |            |            |
| GI_13929444-I | 158.7   | 169.2  | 155.2  | MUCDHL   | <a href="#">NM_031265.1</a> | MU-PCDH;FLJ20219                         |              |             |            |            |
| GI_13929461-S | 545.6   | 907.6  | 623.8  | B4GALT1  | <a href="#">NM_001497.2</a> | GT1;GTB;GGTB2;B4GAL-T1;beta4Gal-T1       | N-           | Golgi       | lactose    |            |
| GI_13929463-A | 571.9   | 515.9  | 500.5  | B4GALT2  | <a href="#">NM_003780.2</a> | B4Gal-T2;B4Gal-T3;beta4Gal-T2            | galactosylt  |             |            |            |
| GI_13929464-I | 136.5   | 144.6  | 142    | B4GALT2  | <a href="#">NM_030587.1</a> | B4Gal-T2;B4Gal-T3;beta4Gal-T2            | galactosylt  |             |            |            |
| GI_13929468-S | 759.4   | 818.1  | 971.9  | B4GALT3  | <a href="#">NM_003779.2</a> | beta4Gal-T3                              | galactosylt  |             |            |            |
| GI_13929469-S | 637.2   | 734.5  | 659.8  | B4GALT4  | <a href="#">NM_003778.2</a> | B4Gal-T4;beta4Gal-T4                     | galactosylt  | Golgi       | membran    |            |
| GI_13929470-S | 940.3   | 2145.3 | 1179.2 | B4GALT5  | <a href="#">NM_004776.2</a> | B4Gal-T5;beta4Gal-T5;beta4Gal-T-V;BETA4- | galactosylt  | Golgi       | carbohydr  |            |
| GI_13929471-S | 219.5   | 162.4  | 211.1  | B4GALT6  | <a href="#">NM_004775.2</a> | B4Gal-T6;beta4Gal-T6                     | galactosylt  | Golgi       |            |            |
| GI_13929472-S | 145.2   | 175.1  | 153.7  | CDC10    | <a href="#">NM_001788.2</a> |                                          | 7-Sep        | GTP         | kinesin    | cytokinesi |
| GI_13929473-S | 85.3    | 83.5   | 91.1   | NAT8     | <a href="#">NM_003960.2</a> | GLA;CML1;TSC501;TSC510                   | N-           |             | drug       |            |
| GI_13937360-S | 193.6   | 196.4  | 197.9  | TRF4-2   | <a href="#">NM_022447.1</a> |                                          | nucleic      |             |            |            |
| GI_13994189-S | 826     | 798.2  | 996.3  | FZD8     | <a href="#">NM_031866.1</a> | FZ-8;hFZ8                                | frizzled     | integral to | frizzled   |            |
| GI_13994233-S | 99.7    | 105.9  | 100.9  | ENAM     | <a href="#">NM_031889.1</a> |                                          | structural   | extracellul | bone       |            |
| GI_13994235-S | 203.5   | 243.3  | 209.5  | CECR6    | <a href="#">NM_031890.1</a> |                                          |              |             |            |            |
| GI_13994241-S | 5427.2  | 5473.4 | 6045.2 | SH3KBP1  | <a href="#">NM_031892.1</a> | CIN85                                    |              | kinesin     |            |            |
| GI_13994243-S | 178.4   | 173.4  | 143.1  | FTHL17   | <a href="#">NM_031894.1</a> |                                          | binding      |             | iron ion   |            |
| GI_13994249-S | 243.6   | 305.7  | 279.3  | TEKT3    | <a href="#">NM_031898.1</a> |                                          | structural   | kinesin     | microtubul |            |
| GI_13994254-S | 98.9    | 119.3  | 102.7  | AGXT2    | <a href="#">NM_031900.1</a> | AGT2                                     | alanine-     | mitochond   | amino      |            |
| GI_13994260-S | 284.4   | 330    | 259.4  | MRPL32   | <a href="#">NM_031903.1</a> | L32mt;HSPC283;MRP-L32;bMRP-59b           | structural   | mitochond   | protein    |            |
| GI_13994267-S | 199.8   | 203.4  | 135.1  | USP26    | <a href="#">NM_031907.1</a> |                                          | cysteine-    | signal      | ubiquitin- |            |
| GI_13994272-S | 97.2    | 106.5  | 86.7   | C1QTNF4  | <a href="#">NM_031909.1</a> | CTRP4;ZACRP4                             |              |             |            |            |
| GI_13994281-S | 507.1   | 359.4  | 341.5  | SETDB2   | <a href="#">NM_031915.1</a> | CLLD8;CLLL8;C13orf4                      | DNA          | nucleus     | chromatin  |            |



|               |        |        |        |            |                             |                                    |             |             |             |
|---------------|--------|--------|--------|------------|-----------------------------|------------------------------------|-------------|-------------|-------------|
| GI_13994286-S | 426    | 404.1  | 435.4  | KLF16      | <a href="#">NM_031918.1</a> | DRRF;BTEB4;NSLP2                   | DNA         | nucleus     | regulation  |
| GI_13994288-S | 102.4  | 106.4  | 124.6  | CSDUFD1    | <a href="#">NM_031919.1</a> |                                    | molecular   | cellular_co | biological_ |
| GI_13994299-S | 505.9  | 352.7  | 579.1  | TMPIT      | <a href="#">NM_031925.1</a> |                                    |             |             |             |
| GI_13994301-S | 144.6  | 188.2  | 183.6  | TTY7       | <a href="#">NM_031926.1</a> |                                    |             |             |             |
| GI_13994315-A | 97.1   | 95.1   | 104.8  | WNT8A      | <a href="#">NM_031933.1</a> | WNT8D                              | signal      | extracellul | developm    |
| GI_13994321-S | 156    | 258.3  | 215.3  | TBC1D10    | <a href="#">NM_031937.1</a> | EPI64                              | PDZ-        | microvillus | biological_ |
| GI_13994332-S | 444.3  | 442.2  | 391.3  | IFP38      | <a href="#">NM_031943.1</a> |                                    | translation |             | translation |
| GI_13994334-S | 112.6  | 111.1  | 103.6  | MIXL1      | <a href="#">NM_031944.1</a> | MIXL;MILD1                         | transcripti | nucleus     | regulation  |
| GI_13994340-S | 137.6  | 151.7  | 150.3  | SLC25A2    | <a href="#">NM_031947.1</a> | ORNT2                              | L-ornithine | mitochond   | mitochond   |
| GI_13994348-S | 125.6  | 127    | 130.6  | SPATA9     | <a href="#">NM_031952.1</a> | FLJ35906;NYD-SP16                  |             |             |             |
| GI_13994357-S | 115.1  | 146.7  | 141.1  | NYD-SP14   | <a href="#">NM_031956.1</a> |                                    |             |             |             |
| GI_13994359-S | 112.5  | 172.8  | 114.9  | KRTAP1-5   | <a href="#">NM_031957.1</a> | KAP1.5;KRTAP1.5                    | receptor    |             |             |
| GI_13994361-S | 142.8  | 183.3  | 161.9  | KRTAP3-1   | <a href="#">NM_031958.1</a> | KAP3.1;KRTAP3.1                    |             | intermedia  |             |
| GI_13994371-S | 145.9  | 172.8  | 160.8  | KRTAP17-1  | <a href="#">NM_031964.1</a> | KAP17.1;KRTAP16.1;KRTAP17.1        |             |             |             |
| GI_13994373-S | 179.6  | 194.6  | 198    | GSG2       | <a href="#">NM_031965.1</a> |                                    | ATP         |             | protein     |
| GI_14028874-S | 146.1  | 148.3  | 165.8  | SLC35D1    | <a href="#">NM_015139.1</a> | UGTREL7;KIAA0260                   | sugar       | endoplas    | transport   |
| GI_14042922-S | 1124.8 | 905.8  | 1104.4 | C9orf5     | <a href="#">NM_032012.1</a> | CG2;CG-2                           | molecular   | integral to | biological_ |
| GI_14042940-S | 5886.3 | 6020.1 | 4370.1 | eIF2A      | <a href="#">NM_032025.1</a> | CDA02                              |             |             |             |
| GI_14042942-S | 656.7  | 610.1  | 499.3  | CDA11      | <a href="#">NM_032026.1</a> |                                    |             |             |             |
| GI_14042948-S | 156.2  | 156.3  | 155.6  | FKSG87     | <a href="#">NM_032029.1</a> |                                    |             |             |             |
| GI_14042950-S | 75.5   | 82.7   | 83.9   | FKSG83     | <a href="#">NM_032030.1</a> | 6p22.2-p21.31                      | pheromon    | integral to | G-protein   |
| GI_14042952-S | 110.9  | 119.3  | 113.9  | FKSG17     | <a href="#">NM_032031.1</a> |                                    |             |             |             |
| GI_14042954-S | 101.8  | 116.3  | 111.5  | FKSG42     | <a href="#">NM_032032.1</a> |                                    |             |             |             |
| GI_14042956-S | 116.8  | 124    | 112.7  | FKSG43     | <a href="#">NM_032033.1</a> |                                    |             | cytoskelet  |             |
| GI_14042959-S | 247.7  | 276.4  | 262    | SLC4A11    | <a href="#">NM_032034.1</a> | BTR1;dJ794I6.2                     | inorganic   | membran     | anion       |
| GI_14042961-S | 1055.9 | 602.7  | 533.8  | C14orf141  | <a href="#">NM_032035.1</a> | MSTP031                            |             |             |             |
| GI_14042963-S | 457    | 646.8  | 598.1  | FAM14A     | <a href="#">NM_032036.1</a> | TLH29                              |             | integral to |             |
| GI_14042965-S | 284.2  | 228    | 240.3  | SSTK       | <a href="#">NM_032037.1</a> |                                    | ATP         |             | protein     |
| GI_14042967-S | 2034.5 | 2449.5 | 2322.4 | SPINL      | <a href="#">NM_032038.1</a> |                                    |             |             |             |
| GI_14042969-S | 1033.7 | 1653.8 | 1714.2 | DKFZP761DC | <a href="#">NM_032039.1</a> |                                    | cell        | integrin    | cell-matrix |
| GI_14042971-S | 137.4  | 144.6  | 132.6  | CCDC8      | <a href="#">NM_032040.1</a> | DKFZP564K0322                      |             |             |             |
| GI_14042973-S | 303.3  | 265.6  | 279.4  | NCALD      | <a href="#">NM_032041.1</a> |                                    | tubulin     | cytosol     | vesicle-    |
| GI_14042977-S | 182.7  | 197.3  | 188.2  | BRIP1      | <a href="#">NM_032043.1</a> | OF;BACH1                           | ATP         | nucleus     | nucleotide- |
| GI_14042983-S | 109.9  | 111.9  | 103    | MSP        | <a href="#">NM_032046.1</a> |                                    |             |             |             |
| GI_14042987-S | 294.6  | 483.4  | 142.6  | EMILIN2    | <a href="#">NM_032048.1</a> | FOAP-10;EMILIN-2;FLJ33200          | protein     | extracellul | biological_ |
| GI_14043021-S | 8016   | 7037.8 | 6688.8 | MARS       | <a href="#">NM_004990.2</a> | METRNS;MTRNS                       | methionin   | soluble     | protein     |
| GI_14043023-S | 2567.8 | 3695.9 | 2931   | BAG3       | <a href="#">NM_004281.2</a> | BIS;BAG-3;CAIR-1;DKFZp434E0610     | apoptosis   | cellular_co | protein     |
| GI_14043025-S | 237.2  | 353.1  | 186.5  | VAMP8      | <a href="#">NM_003761.2</a> | EDB                                |             | synaptic    | nonselecti  |
| GI_14043031-A | 1624.4 | 1949.1 | 871.5  | C20orf18   | <a href="#">NM_031227.1</a> | XAP4;RNF54;UBCE7IP3                |             | kinesin     |             |
| GI_14043043-A | 124.7  | 119    | 106.8  | CCR9       | <a href="#">NM_006641.2</a> | GPR-9-6                            | chemokin    | integral to | cytosolic   |
| GI_14043059-S | 110.5  | 103.3  | 101.6  | CRYAA      | <a href="#">NM_000394.2</a> | CRYA1                              | chaperone   |             | vision      |
| GI_14043065-A | 136.2  | 143.3  | 139.5  | AGTR1      | <a href="#">NM_032049.1</a> | AT1;AG2S;AT1B;AT2R1;HAT1R;AGTR1A;A | angiotensi  | integral to | cytosolic   |
| GI_14043065-I | 352.7  | 423.1  | 371.6  | AGTR1      | <a href="#">NM_032049.1</a> | AT1;AG2S;AT1B;AT2R1;HAT1R;AGTR1A;A | angiotensi  | integral to | cytosolic   |
| GI_14043068-S | 160.9  | 191.2  | 165.6  | HBA2       | <a href="#">NM_000517.3</a> |                                    |             | hemoglobi   |             |

|               |         |        |        |          |                             |                                     |             |             |            |
|---------------|---------|--------|--------|----------|-----------------------------|-------------------------------------|-------------|-------------|------------|
| GI_14043069-I | 413.7   | 389.6  | 209.4  | HNRPA1   | <a href="#">NM_031157.1</a> | HNRNPA1                             | heterogen   | nucleoplas  | RNA-       |
| GI_14043073-A | 2206.9  | 2769   | 2742.8 | HNRPA2B1 | <a href="#">NM_002137.2</a> | RNPA2;HNRPA2;HNRPB1;SNRBP1;HNRNP    | heterogen   | nucleus     | RNA        |
| GI_14110370-S | 2726.6  | 2203.1 | 2089.7 | CDC16    | <a href="#">NM_003903.2</a> | APC6                                |             | centrosom   | regulation |
| GI_14110374-A | 2827.1  | 2681.3 | 2447.1 | M17S2    | <a href="#">NM_005899.2</a> | NBR1;CA125;KIAA0049                 | tumor       |             |            |
| GI_14110374-I | 117.5   | 122.3  | 104.7  | M17S2    | <a href="#">NM_005899.2</a> | NBR1;CA125;KIAA0049                 | tumor       |             |            |
| GI_14110377-I | 135.5   | 148.9  | 137.6  | M17S2    | <a href="#">NM_031858.1</a> | NBR1;CA125;KIAA0049                 | tumor       |             |            |
| GI_14110380-I | 1443.4  | 1517.7 | 1389.5 | M17S2    | <a href="#">NM_031862.1</a> | NBR1;CA125;KIAA0049                 | tumor       |             |            |
| GI_14110386-I | 119.5   | 127.4  | 112.8  | CDC2L5   | <a href="#">NM_003718.2</a> | CHED;CDC2L;KIAA1791                 | protein     |             | regulation |
| GI_14110389-A | 315.5   | 328.7  | 307    | CDC2L5   | <a href="#">NM_031267.1</a> | CHED;CDC2L;KIAA1791                 | protein     |             | regulation |
| GI_14110394-S | 3604.9  | 1978.2 | 1477.7 | XBP1     | <a href="#">NM_005080.2</a> | XBP2;TREB5                          | DNA         | nucleus     | immune     |
| GI_14110398-S | 150.9   | 172.6  | 139.9  | ALPPL2   | <a href="#">NM_031313.1</a> | ALPG;GCAP;ALPPL                     | magnesium   | integral to | metabolis  |
| GI_14110401-A | 2526    | 2883.9 | 2721.5 | HNRPAB   | <a href="#">NM_004499.2</a> | ABBP1                               | mRNA        | ribonucleo  | mRNA       |
| GI_14110403-I | 549.2   | 593.4  | 585.9  | HNRPAB   | <a href="#">NM_031266.1</a> | ABBP1                               | mRNA        | ribonucleo  | mRNA       |
| GI_14110406-A | 911.5   | 962.5  | 912.3  | HNRPDL   | <a href="#">NM_031372.1</a> | HNRNP;JKTBP;JKTBP2;laAUF1           | double-     | nucleus     | RNA        |
| GI_14110410-I | 1960.6  | 1325.2 | 870.9  | HNRPDL   | <a href="#">NM_005463.2</a> | HNRNP;JKTBP;JKTBP2;laAUF1           | double-     | nucleus     | RNA        |
| GI_14110413-A | 7876.1  | 7511.2 | 6375.9 | HNRPD    | <a href="#">NM_002138.2</a> | P37;AUF1;AUF1A;hnRNPD0              | RNA         | nucleus     | RNA        |
| GI_14110425-S | 1023.3  | 1090.3 | 798    | HNRPA0   | <a href="#">NM_006805.2</a> | hnRNPA0                             | heterogen   | ribonucleo  | mRNA       |
| GI_14110430-A | 4606.7  | 5450.1 | 3805.9 | HNRPC    | <a href="#">NM_004500.2</a> | C1;C2;HNRNP;SNRPC;hnRNPC            | heterogen   | ribonucleo  | mRNA       |
| GI_14140235-S | 109.6   | 107    | 91.8   | SLC5A4   | <a href="#">NM_014227.1</a> | SAAT1;SGLT3;DJ90G24.4               | transporte  | integral to | sodium     |
| GI_14141149-S | 776     | 724.6  | 539.2  | MTA1     | <a href="#">NM_004689.2</a> |                                     | transcripti | nucleus     | signal     |
| GI_14141150-S | 271.2   | 282.1  | 225.2  | HNRPF    | <a href="#">NM_004966.2</a> | HNRNPF;mcs94-1                      | heterogen   | ribonucleo  | RNA        |
| GI_14141151-I | 148.4   | 143.8  | 155.5  | HNRPM    | <a href="#">NM_005968.2</a> | HTGR1;NAGR1;HNRNPM;HNRPM4;HNRNP     | transmem    | membran     |            |
| GI_14141153-A | 6503.2  | 6918.4 | 6035.2 | HNRPM    | <a href="#">NM_031203.1</a> | HTGR1;NAGR1;HNRNPM;HNRPM4;HNRNP     | transmem    | membran     |            |
| GI_14141155-S | 704.8   | 928.1  | 922.9  | HNRPH2   | <a href="#">NM_019597.2</a> | FTP3;HNRPH';hnRNPH'                 | heterogen   | ribonucleo  |            |
| GI_14141158-A | 925     | 858.8  | 827.6  | HNRPH3   | <a href="#">NM_021644.2</a> | 2H9;DKFZP586F0222                   | heterogen   | ribonucleo  | RNA        |
| GI_14141160-A | 5468.4  | 5940.1 | 4693.3 | HNRPU    | <a href="#">NM_004501.2</a> | SAF-A;U21.1;HNRNPU                  | heterogen   | nucleoplas  | RNA        |
| GI_14141162-I | 126.4   | 134.4  | 108.1  | HNRPU    | <a href="#">NM_031844.1</a> | SAF-A;U21.1;HNRNPU                  | heterogen   | nucleoplas  | RNA        |
| GI_14141164-S | 6587.1  | 7605.8 | 8233.1 | PCBP1    | <a href="#">NM_006196.2</a> | HNRPX;HNRPE1;hnRNP-X;hnRNP-E1       | single-     | cytoplasm   | mRNA       |
| GI_14141165-A | 4347.2  | 4917.5 | 5427.4 | PCBP2    | <a href="#">NM_031989.1</a> | HNRPE2;hnRNP-E2                     | RNA         | cytoplasm   | mRNA       |
| GI_14141169-S | 651.7   | 809.3  | 816.6  | MTA2     | <a href="#">NM_004739.2</a> | PID;MTA1L1;MTA1-L1                  | transcripti | histone     | chromatin  |
| GI_14141171-S | 87      | 84.2   | 86.9   | MTNR1A   | <a href="#">NM_005958.2</a> | MEL-1A-R                            | melatonin   | integral to | mating     |
| GI_14141172-S | 100.1   | 106    | 109.7  | MTNR1B   | <a href="#">NM_005959.2</a> | MEL-1B-R                            | melatonin   | integral to | G-protein  |
| GI_14141173-S | 3159.6  | 2361.5 | 1993.4 | HMGB2    | <a href="#">NM_002129.2</a> | HMG2                                | DNA         | nuclear     | chromoso   |
| GI_14141174-S | 106.4   | 105.5  | 90.1   | ABCG5    | <a href="#">NM_022436.2</a> |                                     | nucleotide  | integral to | transport  |
| GI_14141179-S | 1139.1  | 1025.7 | 881    | FADS1    | <a href="#">NM_013402.3</a> | D5D;TU12;FADSD5;LLCDL1              | C-5 sterol  | integral to | fatty acid |
| GI_14141180-S | 653.2   | 495.2  | 132.6  | FADS2    | <a href="#">NM_004265.2</a> | D6D;DES6;TU13;FADSD6;LLCDL2;SLL0262 |             | membran     | fatty acid |
| GI_14141182-S | 4120.5  | 1607.5 | 1400.6 | HMGA2    | <a href="#">NM_003483.3</a> | BABL;LIPO;HMGIC                     | AT DNA      | chromatin   | establish  |
| GI_14141183-S | 137.7   | 135.7  | 138.1  | NBR2     | <a href="#">NM_005821.2</a> |                                     |             |             |            |
| GI_14141188-S | 2059.1  | 2584.8 | 2440.2 | HNRPR    | <a href="#">NM_005826.2</a> | HNRNPR;hnRNP-R                      | heterogen   | ribonucleo  | mRNA       |
| GI_14141189-S | 28828.3 | 27769  | 20714  | RPL27A   | <a href="#">NM_000990.2</a> |                                     | structural  | cytosolic   | protein    |
| GI_14141190-S | 135.9   | 143.4  | 124    | HOXB13   | <a href="#">NM_006361.2</a> |                                     | transcripti | nucleus     | epidermal  |
| GI_14141191-S | 41768.5 | 40136  | 34120  | RPS14    | <a href="#">NM_005617.2</a> | EMTB                                | structural  | cytosolic   | protein    |
| GI_14141192-S | 16654.1 | 13615  | 11172  | RPS9     | <a href="#">NM_001013.2</a> |                                     | structural  | cytosolic   | protein    |
| GI_14141194-S | 1042.7  | 1401.5 | 1342.8 | SDF2     | <a href="#">NM_006923.2</a> |                                     | dolichyl-   | membran     | protein    |

|               |        |        |        |             |                             |                                   |             |              |             |
|---------------|--------|--------|--------|-------------|-----------------------------|-----------------------------------|-------------|--------------|-------------|
| GI_14141725-S | 295.2  | 343    | 358.1  | SLC30A1     | <a href="#">NM_021194.1</a> | ZNT1                              | cation      | integral to  | zinc ion    |
| GI_14149608-S | 661.3  | 941.8  | 618    | EXTL2       | <a href="#">NM_001439.1</a> | EXTR2                             | tumor       | endoplas     |             |
| GI_14149614-S | 2197.5 | 2555.3 | 1978.2 | MGC4189     | <a href="#">NM_032308.1</a> |                                   |             |              |             |
| GI_14149616-S | 5114.2 | 5206.5 | 4386.1 | NCOA4       | <a href="#">NM_005437.1</a> | RFG;ELE1;PTC3;ARA70;DKFZp762E1112 | transcripti | nucleus      | male        |
| GI_14149626-S | 324.7  | 298.5  | 284.8  | USP15       | <a href="#">NM_006313.1</a> | UNPH4;KIAA0529                    | ubiquitin-  |              | deubiquiti  |
| GI_14149628-S | 1377   | 1529.8 | 1503.8 | XAB1        | <a href="#">NM_007266.1</a> | MBDIN;NTPBP                       | nucleotide  |              | small       |
| GI_14149650-S | 104.1  | 99.3   | 98.1   | NSG-X       | <a href="#">NM_014411.1</a> |                                   |             |              |             |
| GI_14149652-S | 513.2  | 585.2  | 539.9  | TOR1B       | <a href="#">NM_014506.1</a> | DQ1;MGC4386                       | adenosine   |              |             |
| GI_14149656-S | 3581   | 4129.3 | 3952.6 | KIAA1049    | <a href="#">NM_014972.1</a> |                                   |             |              |             |
| GI_14149666-S | 170.9  | 311.3  | 270    | SARM1       | <a href="#">NM_015077.1</a> | SARM;SAMD2;KIAA0524               | transmem    | membran      |             |
| GI_14149670-S | 582.3  | 488.3  | 466.1  | MAST2       | <a href="#">NM_015112.1</a> | MTSSK;MAST205;KIAA0807            |             |              |             |
| GI_14149674-S | 440.7  | 389.5  | 300.9  | CSTF2T      | <a href="#">NM_015235.1</a> | CstF-64T;KIAA0689;DKFZp434C1013   | nucleic     |              |             |
| GI_14149676-S | 187.7  | 166.5  | 162.7  | LPHN3       | <a href="#">NM_015236.1</a> | LEC3;KIAA0768                     |             |              |             |
| GI_14149679-S | 2713.9 | 2901.1 | 2707.4 | MBC2        | <a href="#">NM_015292.1</a> | KIAA0747                          | rhodopsin-  | integral to  | G-protein   |
| GI_14149687-S | 5086.4 | 4973.4 | 4731.3 | NICE-3      | <a href="#">NM_015449.1</a> | HSPC012;DKFZp586G1722             |             |              |             |
| GI_14149689-S | 264.2  | 272.5  | 263.8  | DKFZP434F0  | <a href="#">NM_015453.1</a> |                                   | molecular   |              |             |
| GI_14149693-S | 100.8  | 104.6  | 107.4  | LRRC21      | <a href="#">NM_015613.1</a> | PAL;DKFZP434K091                  | transmem    | integral to  | photorece   |
| GI_14149701-S | 541.5  | 561.5  | 604.5  | DKFZP566HC  | <a href="#">NM_015528.1</a> |                                   |             |              |             |
| GI_14149707-S | 189.5  | 200.9  | 173.5  | DKFZP434C1  | <a href="#">NM_015621.1</a> |                                   |             |              |             |
| GI_14149711-S | 135.6  | 158.5  | 129.8  | C1QTNF5     | <a href="#">NM_015645.1</a> | CTRP5;DKFZp586B0621               |             |              | microfibril |
| GI_14149715-S | 168.7  | 174.3  | 162.8  | PPP1R12C    | <a href="#">NM_017607.1</a> | p84;DKFZp434D0412                 |             |              |             |
| GI_14149719-S | 727.3  | 769.6  | 735.7  | FLJ11301    | <a href="#">NM_018385.1</a> |                                   | DNA         | nucleus      | regulation  |
| GI_14149723-S | 157.7  | 159.5  | 153.4  | MESP1       | <a href="#">NM_018670.1</a> | IR1899308                         |             |              |             |
| GI_14149729-S | 501.8  | 507.4  | 479.2  | SMARCA1     | <a href="#">NM_020159.1</a> | ETL1;KIAA1122;DKFZp762K2015       | ATP         | nucleus      | regulation  |
| GI_14149733-S | 478    | 543.5  | 530.5  | CORO1B      | <a href="#">NM_020441.1</a> | CORONIN-2;DKFZP762I166            | actin       | kinesin      |             |
| GI_14149737-S | 409.1  | 387.2  | 260.2  | NLN         | <a href="#">NM_020726.1</a> | KIAA1226                          |             |              |             |
| GI_14149741-S | 416.7  | 556.9  | 502.6  | KIAA1536    | <a href="#">NM_020898.1</a> |                                   |             |              |             |
| GI_14149772-S | 224.2  | 270.7  | 234.2  | DKFZP564OC  | <a href="#">NM_032120.1</a> |                                   |             |              |             |
| GI_14149778-S | 372.1  | 438.3  | 428.8  | DKFZP564DC  | <a href="#">NM_032125.1</a> |                                   | electron    |              | electron    |
| GI_14149780-S | 221.6  | 274    | 267    | DKFZP564J0  | <a href="#">NM_032126.1</a> |                                   |             |              |             |
| GI_14149782-S | 571.8  | 576.2  | 468.5  | DKFZP566M   | <a href="#">NM_032127.1</a> | FLJ22665;KIAA1759                 |             |              |             |
| GI_14149784-S | 85.6   | 85.4   | 89.7   | DKFZP566M   | <a href="#">NM_032128.1</a> |                                   |             |              |             |
| GI_14149786-S | 97.5   | 100.1  | 98.4   | DKFZP434H2  | <a href="#">NM_032129.1</a> |                                   |             |              |             |
| GI_14149788-S | 115.2  | 117.2  | 121.3  | DKFZP434J0  | <a href="#">NM_032130.1</a> |                                   |             |              |             |
| GI_14149792-S | 116.9  | 128.8  | 118.4  | DKFZP434P0  | <a href="#">NM_032134.1</a> |                                   |             |              |             |
| GI_14149798-S | 283.1  | 314.4  | 309.8  | RAB6C       | <a href="#">NM_032144.1</a> | WTH3                              | GTP         | intracellula | protein     |
| GI_14149802-S | 1338.1 | 1002.2 | 864.5  | ANKRD27     | <a href="#">NM_032139.1</a> | FLJ00040;DKFZP434L0718            |             |              |             |
| GI_14149804-S | 1223.1 | 1165.5 | 1261   | DKFZP434A1  | <a href="#">NM_032140.1</a> |                                   |             |              |             |
| GI_14149806-S | 557.1  | 429.5  | 374.8  | DKFZP434K1  | <a href="#">NM_032141.1</a> |                                   |             |              |             |
| GI_14149810-S | 109.5  | 118.8  | 119.9  | DKFZP434B1  | <a href="#">NM_032143.1</a> |                                   |             |              |             |
| GI_14149816-S | 92.3   | 90.7   | 96.3   | USP44       | <a href="#">NM_032147.1</a> | FLJ14528;DKFZP434D0127            | nucleic     |              | electron    |
| GI_14149820-S | 114.9  | 131.7  | 127.6  | DKFZP434GC  | <a href="#">NM_032149.1</a> |                                   | cysteine-   |              | ubiquitin-  |
| GI_14149832-S | 124.8  | 138.4  | 131.1  | DKFZp547I09 | <a href="#">NM_032155.1</a> |                                   |             |              |             |
| GI_14149848-S | 86.4   | 83.9   | 83     | FLJ12363    | <a href="#">NM_032167.1</a> |                                   |             |              |             |

|               |        |        |        |             |                             |                            |                     |                     |
|---------------|--------|--------|--------|-------------|-----------------------------|----------------------------|---------------------|---------------------|
| GI_14149856-S | 84     | 96.8   | 89.3   | FLJ12787    | <a href="#">NM_032175.1</a> |                            |                     |                     |
| GI_14149858-S | 216.2  | 231.1  | 172.6  | PHAX        | <a href="#">NM_032177.1</a> | FLJ13193                   |                     |                     |
| GI_14149860-S | 168.7  | 151.1  | 125.1  | FLJ13291    | <a href="#">NM_032178.1</a> |                            |                     |                     |
| GI_14149862-A | 844    | 945.2  | 723.8  | FLJ20542    | <a href="#">NM_032179.1</a> | FLJ13294                   |                     |                     |
| GI_14149864-S | 1429.2 | 1695   | 1133.8 | FLJ13391    | <a href="#">NM_032181.1</a> |                            |                     |                     |
| GI_14149874-S | 1120   | 1050.5 | 714.2  | MYST1       | <a href="#">NM_032188.1</a> | MOF;hMOF;FLJ14040          |                     |                     |
| GI_14149901-S | 242.8  | 232.4  | 211    | FLJ21742    | <a href="#">NM_032207.1</a> |                            |                     |                     |
| GI_14149903-I | 3507.3 | 4039.1 | 2832.2 | ANTXR1      | <a href="#">NM_032208.1</a> | ATR;TEM8;FLJ10601;FLJ21776 | receptor            | integral to         |
| GI_14149905-S | 103.7  | 91.7   | 82.7   | FLJ21777    | <a href="#">NM_032209.1</a> |                            |                     |                     |
| GI_14149929-S | 1185.1 | 1534.4 | 1339.1 | FLJ22679    | <a href="#">NM_032227.1</a> | FLJ20173                   |                     |                     |
| GI_14149947-S | 223.4  | 280.2  | 253.5  | FLJ23416    | <a href="#">NM_032238.1</a> |                            |                     |                     |
| GI_14149955-S | 1639.8 | 1766.2 | 2028.4 | DKFZp564A1  | <a href="#">NM_032242.1</a> |                            |                     |                     |
| GI_14149959-S | 297.9  | 263.8  | 321.9  | DKFZp434I19 | <a href="#">NM_032245.1</a> |                            |                     |                     |
| GI_14149963-S | 150.4  | 167.1  | 157.4  | DKFZp434E0  | <a href="#">NM_032247.1</a> |                            |                     |                     |
| GI_14149965-S | 132.6  | 150.2  | 131.1  | DKFZp434F1  | <a href="#">NM_032248.1</a> |                            |                     |                     |
| GI_14149967-S | 121.4  | 119    | 121.5  | DKFZp434F1  | <a href="#">NM_032249.1</a> |                            |                     |                     |
| GI_14149970-S | 91.7   | 103.3  | 88.5   | DKFZp434A1  | <a href="#">NM_032250.1</a> |                            |                     |                     |
| GI_14149976-S | 233.8  | 288.7  | 281.6  | DKFZp434F1  | <a href="#">NM_032254.1</a> |                            |                     |                     |
| GI_14149978-S | 208.7  | 227.2  | 208.1  | ZNF541      | <a href="#">NM_032255.1</a> | DKFZp434I1930              |                     |                     |
| GI_14149980-S | 304.7  | 345.8  | 468.3  | DKFZp434K2  | <a href="#">NM_032256.1</a> |                            |                     |                     |
| GI_14149984-S | 175.2  | 210.7  | 186.7  | TBC1D3      | <a href="#">NM_032258.1</a> | PRC17;DKFZp434P2235        | GTPase              | cell growth         |
| GI_14149986-S | 141.2  | 133.3  | 192.4  | DKFZp434F0  | <a href="#">NM_032259.1</a> |                            | electron            | electron            |
| GI_14149994-S | 162.8  | 194.1  | 279.3  | DKFZp434N0  | <a href="#">NM_032262.1</a> | DKFZp434G1017              |                     |                     |
| GI_14149996-S | 255.6  | 245.1  | 231.6  | AE2         | <a href="#">NM_032264.1</a> | DKFZp434D177               |                     |                     |
| GI_14149998-S | 169.4  | 186.6  | 180.9  | ZMYND15     | <a href="#">NM_032265.1</a> | DKFZp434N127               |                     |                     |
| GI_14150000-S | 212.8  | 240.9  | 220.7  | C2orf16     | <a href="#">NM_032266.1</a> | DKFZp434G118               |                     |                     |
| GI_14150002-S | 91.9   | 117.5  | 100.8  | RGSL2       | <a href="#">NM_032267.1</a> | DKFZp434E169               | signal              |                     |
| GI_14150018-S | 98.9   | 97     | 91.4   | DKFZp547F0  | <a href="#">NM_032274.1</a> |                            |                     |                     |
| GI_14150026-S | 1171.2 | 787.9  | 803.3  | ZCCHC9      | <a href="#">NM_032280.1</a> | DKFZp761J139               | nucleic             |                     |
| GI_14150028-S | 223.1  | 235.7  | 228.9  | DKFZp547J0  | <a href="#">NM_032281.1</a> |                            |                     |                     |
| GI_14150030-S | 1307.5 | 1598.1 | 1866.3 | DKFZp761O1  | <a href="#">NM_032287.1</a> |                            |                     |                     |
| GI_14150034-S | 169.3  | 198.7  | 186.4  | DKFZp761B0  | <a href="#">NM_032289.1</a> |                            |                     |                     |
| GI_14150036-S | 224.6  | 206.2  | 213    | DKFZp761C1  | <a href="#">NM_032290.1</a> |                            |                     |                     |
| GI_14150038-S | 185    | 209.7  | 204    | DKFZp761D2  | <a href="#">NM_032291.1</a> |                            |                     |                     |
| GI_14150040-S | 1648.7 | 1345.8 | 1519.9 | HAGHL       | <a href="#">NM_032304.1</a> | MGC2605                    |                     |                     |
| GI_14150046-S | 610.1  | 824.6  | 615.1  | SLC37A3     | <a href="#">NM_032295.1</a> | DKFZp761N0624              |                     |                     |
| GI_14150048-S | 530.7  | 583.3  | 392.6  | DKFZp761A1  | <a href="#">NM_032296.1</a> | KIAA1552                   |                     |                     |
| GI_14150051-S | 172.5  | 224.2  | 229.3  | DKFZp761D1  | <a href="#">NM_032297.1</a> |                            |                     |                     |
| GI_14150053-S | 232    | 289.9  | 264.3  | SYT3        | <a href="#">NM_032298.1</a> | SytIII;DKFZp761O132        | transporte synaptic | transport           |
| GI_14150057-S | 514.7  | 731.6  | 633.2  | MGC10870    | <a href="#">NM_032301.1</a> |                            |                     |                     |
| GI_14150059-S | 796.7  | 732.9  | 684.4  | MGC10911    | <a href="#">NM_032302.1</a> |                            |                     |                     |
| GI_14150063-S | 546.2  | 616.4  | 576    | MGC3200     | <a href="#">NM_032305.1</a> |                            |                     |                     |
| GI_14150079-S | 1100.7 | 1274.9 | 1141.3 | MGC4767     | <a href="#">NM_032314.1</a> |                            |                     |                     |
| GI_14150081-S | 921    | 823.7  | 576.4  | MGC4399     | <a href="#">NM_032315.1</a> |                            | binding             | mitochond transport |

|               |        |        |        |          |                             |                                 |                     |                       |
|---------------|--------|--------|--------|----------|-----------------------------|---------------------------------|---------------------|-----------------------|
| GI_14150087-S | 263.1  | 358.4  | 503    | HIATL2   | <a href="#">NM_032318.1</a> | MGC12945                        | transporte membran  | transport             |
| GI_14150089-S | 227.2  | 220.5  | 235.7  | C2orf7   | <a href="#">NM_032319.1</a> | MGC13004                        | peptidase           | proteolysis           |
| GI_14150093-S | 110    | 111    | 106.6  | MGC13057 | <a href="#">NM_032321.1</a> |                                 |                     |                       |
| GI_14150097-S | 425.7  | 366.1  | 331    | MGC13102 | <a href="#">NM_032323.1</a> |                                 |                     |                       |
| GI_14150099-S | 1436.1 | 1512   | 1497   | MGC13186 | <a href="#">NM_032324.1</a> |                                 | ATP-                | proteolysis           |
| GI_14150107-S | 122.8  | 126.6  | 124.2  | MGC12458 | <a href="#">NM_032328.1</a> |                                 | calcium             |                       |
| GI_14150117-S | 238.4  | 231.9  | 210.5  | MGC14595 | <a href="#">NM_032334.1</a> |                                 |                     |                       |
| GI_14150119-A | 137.6  | 151.9  | 144.6  | PHF6     | <a href="#">NM_032335.1</a> | BFLS;KIAA1823;MGC14797          | electron            | electron              |
| GI_14150119-I | 79.2   | 82.9   | 82.8   | PHF6     | <a href="#">NM_032335.1</a> | BFLS;KIAA1823;MGC14797          | electron            | electron              |
| GI_14150121-S | 101.2  | 109.4  | 110.2  | MGC14799 | <a href="#">NM_032336.1</a> |                                 |                     |                       |
| GI_14150127-S | 1086   | 1105.4 | 1015.8 | C6orf125 | <a href="#">NM_032340.1</a> | MGC14833;bA6B20.2               |                     |                       |
| GI_14150131-S | 91.9   | 490.7  | 160.7  | MGC12992 | <a href="#">NM_032342.1</a> |                                 |                     |                       |
| GI_14150133-S | 539.3  | 524.7  | 559.3  | CHCHD6   | <a href="#">NM_032343.1</a> | MGC13016                        |                     |                       |
| GI_14150136-S | 953.2  | 991    | 1012.1 | MGC13045 | <a href="#">NM_032344.1</a> |                                 |                     |                       |
| GI_14150138-S | 249    | 355.7  | 319.7  | PYM      | <a href="#">NM_032345.1</a> | MGC13064                        |                     |                       |
| GI_14150140-S | 858.4  | 742.8  | 611.8  | MGC13096 | <a href="#">NM_032346.1</a> |                                 | apoptosis cytoplasm | apoptosis             |
| GI_14150142-S | 124.9  | 144.3  | 144.2  | ZNF397   | <a href="#">NM_032347.1</a> | ZNF47;MGC13250                  |                     |                       |
| GI_14150170-S | 2483.2 | 2695.4 | 2704.6 | THOC3    | <a href="#">NM_032361.1</a> | TEX1;MGC5469                    | RNA                 | nucleus transport     |
| GI_14150172-S | 210.9  | 254.2  | 220    | HEIL1    | <a href="#">NM_032362.1</a> |                                 |                     |                       |
| GI_14150184-S | 229.6  | 177.5  | 157.6  | ZBED3    | <a href="#">NM_032367.1</a> | MGC15435                        | DNA                 |                       |
| GI_14150188-S | 177.8  | 231.8  | 192.3  | MGC15619 | <a href="#">NM_032369.1</a> |                                 | cation membran      | cation                |
| GI_14150190-S | 263    | 344.7  | 307    | MGC15716 | <a href="#">NM_032370.1</a> |                                 |                     |                       |
| GI_14150216-I | 108.7  | 135    | 125.9  | C5orf4   | <a href="#">NM_032385.1</a> | FLJ13758                        |                     |                       |
| GI_14150228-S | 84.3   | 88     | 93.4   | RAP140   | <a href="#">NM_015224.1</a> | se89-1;KIAA1105                 |                     |                       |
| GI_14161691-S | 113    | 120.7  | 94.2   | CAPNS2   | <a href="#">NM_032330.1</a> | MGC12536;MGC14804               | calcium             |                       |
| GI_14165257-S | 123.3  | 141.5  | 141.1  | CYLD     | <a href="#">NM_015247.1</a> | EAC;CDMT;CYLD1;HSPC057;KIAA0849 |                     |                       |
| GI_14165263-I | 235.1  | 263.2  | 251.2  | NDRG4    | <a href="#">NM_020465.1</a> | SMAP-8;KIAA1180                 |                     | cytoplasm response    |
| GI_14165271-S | 1350.8 | 1882.1 | 1920.8 | PINK1    | <a href="#">NM_032409.1</a> | BRPK                            | protein-            | protein               |
| GI_14165275-S | 98.6   | 89     | 94.3   | ECRG4    | <a href="#">NM_032411.1</a> |                                 |                     |                       |
| GI_14165281-S | 99.4   | 108.2  | 99     | PROK1    | <a href="#">NM_032414.1</a> | PK1;PRK1;EGVEGF                 | growth              | cell                  |
| GI_14165285-S | 207.9  | 188.3  | 181.5  | RHOBTB2  | <a href="#">NM_015178.1</a> | DBC2;KIAA0717                   | RAS small           | protein               |
| GI_14165380-A | 129.3  | 142.3  | 123.2  | PCDHA10  | <a href="#">NM_031859.1</a> | CNR8;CNRN8;CNRS8;CRNR8;PCDH-    | cell                | integral to cell      |
| GI_14165380-I | 84.7   | 79.6   | 74.3   | PCDHA10  | <a href="#">NM_031859.1</a> | CNR8;CNRN8;CNRS8;CRNR8;PCDH-    | cell                | integral to cell      |
| GI_14165386-A | 112.9  | 122.5  | 112.3  | PCDHA11  | <a href="#">NM_031861.1</a> | CNR7;CNRN7;CNRS7;CRNR7;PCDH-    | cell                | integral to cell      |
| GI_14165389-A | 101    | 108    | 87.2   | PCDHA6   | <a href="#">NM_031848.1</a> | CNR2;CNRN2;CNRS2;CRNR2;PCDH-    | cell                | integral to cell      |
| GI_14165391-A | 104.5  | 101.5  | 101.9  | PCDHA12  | <a href="#">NM_031864.1</a> | PCDH-ALPHA12                    | calcium             | integral to homophili |
| GI_14165396-A | 88     | 92     | 91.9   | PCDHA13  | <a href="#">NM_031865.1</a> | CNR5;CNRN5;CNRS5;CRNR5;PCDH-    | calcium             | integral to homophili |
| GI_14165399-A | 77.2   | 89.1   | 75     | PCDHA1   | <a href="#">NM_031410.1</a> | PCDH-ALPHA1                     | cell                | integral to cell      |
| GI_14165399-I | 85.8   | 100.2  | 102.5  | PCDHA1   | <a href="#">NM_031410.1</a> | PCDH-ALPHA1                     | cell                | integral to cell      |
| GI_14165404-A | 87.6   | 102    | 93.6   | PCDHA2   | <a href="#">NM_031495.1</a> | PCDH-ALPHA2                     | cell                | integral to cell      |
| GI_14165404-I | 76.7   | 77.7   | 83.8   | PCDHA2   | <a href="#">NM_031495.1</a> | PCDH-ALPHA2                     | cell                | integral to cell      |
| GI_14165406-I | 126.2  | 128.3  | 122    | PCDHA2   | <a href="#">NM_031496.1</a> | PCDH-ALPHA2                     | cell                | integral to cell      |
| GI_14165409-A | 104.8  | 103.6  | 98.3   | PCDHA3   | <a href="#">NM_031497.1</a> | PCDH-ALPHA3                     | cell                | integral to cell      |
| GI_14165409-I | 119.9  | 123.9  | 112.9  | PCDHA3   | <a href="#">NM_031497.1</a> | PCDH-ALPHA3                     | cell                | integral to cell      |

|               |        |        |        |          |                             |                                   |            |             |                      |
|---------------|--------|--------|--------|----------|-----------------------------|-----------------------------------|------------|-------------|----------------------|
| GI_14165412-A | 132.4  | 140.7  | 126.4  | PCDHA4   | <a href="#">NM_031500.1</a> | CNR1;CNRN1;CRNR1;PCDH-ALPHA4      | cell       | integral to | cell                 |
| GI_14165415-A | 89.5   | 82.1   | 84.1   | PCDHA5   | <a href="#">NM_031501.1</a> | CNR6;CNRN6;CNRS6;CRNR6;PCDH-      | cell       | integral to | cell                 |
| GI_14165415-I | 169    | 192.1  | 179.2  | PCDHA5   | <a href="#">NM_031501.1</a> | CNR6;CNRN6;CNRS6;CRNR6;PCDH-      | cell       | integral to | cell                 |
| GI_14165418-A | 119.5  | 108.6  | 113.5  | PCDHA7   | <a href="#">NM_031852.1</a> | CNR4;CNRN4;CNRS4;CRNR4;PCDH-      | cell       | integral to | cell                 |
| GI_14165421-A | 306    | 386.7  | 362.8  | PCDHA8   | <a href="#">NM_031856.1</a> | PCDH-ALPHA8                       | cell       | integral to | cell                 |
| GI_14165421-I | 87.3   | 90     | 84.7   | PCDHA8   | <a href="#">NM_031856.1</a> | PCDH-ALPHA8                       | cell       | integral to | cell                 |
| GI_14165424-A | 171.7  | 215.4  | 185.7  | PCDHA9   | <a href="#">NM_031857.1</a> | KIAA0345;PCDH-ALPHA9              | calcium    | integral to | homophili            |
| GI_14165436-A | 293.7  | 382    | 315.6  | HNRPK    | <a href="#">NM_031263.1</a> | CSBP;TUNP;HNRNPK                  | heterogen  | nucleoplas  | RNA                  |
| GI_14165449-A | 337.1  | 385.2  | 357.8  | COL4A3   | <a href="#">NM_031366.1</a> | TUMSTATIN                         | collagen   | collagen    | negative             |
| GI_14165451-A | 346    | 346.1  | 376.3  | COL4A3BP | <a href="#">NM_031361.1</a> | GPBP;CERTL;STARD11                | protein    | kinesin     | protein              |
| GI_14165455-A | 300.8  | 381.6  | 350.3  | MAP1B    | <a href="#">NM_032010.1</a> | MAP5;FUTSCH                       | structural | microtubul  | cell shape           |
| GI_14165455-I | 103.9  | 119.3  | 101.5  | MAP1B    | <a href="#">NM_032010.1</a> | MAP5;FUTSCH                       | structural | microtubul  | cell shape           |
| GI_14165457-I | 98     | 106    | 113.3  | MAP1B    | <a href="#">NM_005909.2</a> | MAP5;FUTSCH                       | structural | microtubul  | cell shape           |
| GI_14165459-A | 699.8  | 862.9  | 816.8  | NARF     | <a href="#">NM_012336.2</a> | FLJ10067;DKFZp434G0420            | lamin      | nuclear     |                      |
| GI_14165460-I | 199    | 228.1  | 210.9  | NARF     | <a href="#">NM_031968.1</a> | FLJ10067;DKFZp434G0420            | lamin      | nuclear     |                      |
| GI_14165467-S | 21816  | 19998  | 17633  | RPS18    | <a href="#">NM_022551.2</a> | KE3;HKE3;KE-3                     | structural | small       | protein              |
| GI_14165470-S | 1136.9 | 1238.7 | 1251.6 | CDC42EP4 | <a href="#">NM_012121.3</a> | CEP4;BORG4;KAIA1777               |            |             |                      |
| GI_14165471-S | 1301.7 | 1382   | 1251.9 | SUGT1    | <a href="#">NM_006704.2</a> | SGT1                              |            |             | kinetochor centromer |
| GI_14192940-S | 95.7   | 108.6  | 90.5   | MEGF11   | <a href="#">NM_032445.1</a> | KIAA1781                          | ubiquinol- | membran     | electron             |
| GI_14192942-S | 135.8  | 265.9  | 101    | MEGF10   | <a href="#">NM_032446.1</a> | KIAA1780                          | structural |             |                      |
| GI_14195591-S | 89.2   | 103.3  | 90.1   | PCDHB10  | <a href="#">NM_018930.2</a> | PCHB10;PCDH-BETA10                | cell       | integral to | cell                 |
| GI_14195592-S | 147    | 178.1  | 156.4  | PCDHB11  | <a href="#">NM_018931.2</a> | ME2;PCDH-BETA11                   | cell       | integral to | cell                 |
| GI_14195593-S | 134.1  | 151.6  | 146    | PCDHB12  | <a href="#">NM_018932.2</a> | PCDH-BETA12                       | cell       | integral to | cell                 |
| GI_14195594-S | 122.2  | 111.8  | 127.2  | PCDHB13  | <a href="#">NM_018933.2</a> | PCDH-BETA13                       | calcium-   | integral to | synaptoge            |
| GI_14195596-A | 154.4  | 155    | 142.9  | PPP1R12B | <a href="#">NM_032103.1</a> | MYPT2                             | enzyme     |             | regulation           |
| GI_14195602-S | 132.7  | 128.7  | 133.4  | PCDHB14  | <a href="#">NM_018934.2</a> | PCDH-BETA14                       | cell       | integral to | cell                 |
| GI_14195603-S | 194.4  | 170.8  | 224    | PCDHB15  | <a href="#">NM_018935.2</a> | PCDH-BETA15                       | cell       | integral to | cell                 |
| GI_14195604-S | 104.5  | 111.8  | 99.2   | PCDHB16  | <a href="#">NM_020957.1</a> | ME1;PCDH3X;PCDHB8a;KIAA1621;PCDH- | calcium-   | integral to | synaptoge            |
| GI_14195606-S | 80.9   | 83.2   | 84.6   | PCDHB1   | <a href="#">NM_013340.2</a> | PCDH-BETA1                        | calcium    | integral to | homophili            |
| GI_14195608-S | 129    | 120.9  | 117.6  | PCDHB2   | <a href="#">NM_018936.2</a> | PCDH-BETA2                        | cell       | integral to | cell                 |
| GI_14195609-S | 114    | 130.3  | 115.8  | PCDHB3   | <a href="#">NM_018937.2</a> | PCDH-BETA3                        | cell       | integral to | cell                 |
| GI_14195610-S | 175.1  | 210.5  | 164.8  | PCDHB4   | <a href="#">NM_018938.2</a> | PCDH-BETA4                        | cell       | integral to | cell                 |
| GI_14195611-S | 188    | 336.6  | 179.7  | PCDHB5   | <a href="#">NM_015669.2</a> | PCDH-BETA5;DKFZP586B0217          | calcium-   | integral to | synaptoge            |
| GI_14195612-S | 105.2  | 135.3  | 106.4  | PCDHB6   | <a href="#">NM_018939.2</a> | PCDH-BETA6                        | cell       | integral to | cell                 |
| GI_14195613-S | 113.8  | 170.5  | 119.4  | PCDHB7   | <a href="#">NM_018940.2</a> | PCDH-BETA7                        | calcium    | integral to | homophili            |
| GI_14195614-S | 110.8  | 128.5  | 101    | PCDHB8   | <a href="#">NM_019120.2</a> | PCDH3I;PCDH-BETA8                 | calcium    | integral to | homophili            |
| GI_14195617-A | 110.6  | 125.5  | 122.4  | MAP2     | <a href="#">NM_031845.1</a> | MAP2A;MAP2B;MAP2C                 | structural | microtubul  | microtubul           |
| GI_14195629-A | 125.1  | 134.3  | 121.9  | MAP4     | <a href="#">NM_030983.1</a> |                                   | structural | microtubul  |                      |
| GI_14195631-I | 146.9  | 148.7  | 150.8  | MAP4     | <a href="#">NM_002375.2</a> |                                   | structural | microtubul  |                      |
| GI_14195632-S | 121.9  | 142    | 117.7  | MAGEC1   | <a href="#">NM_005462.2</a> | CT7;MAGE-C1                       | tumor      |             |                      |
| GI_14195633-S | 1910.6 | 3334.1 | 2257.6 | MAGED1   | <a href="#">NM_006986.2</a> | NRAGE;DLXIN-1                     | tumor      |             |                      |
| GI_14196447-A | 119.2  | 116.1  | 109.2  | PCDHGA10 | <a href="#">NM_032090.1</a> | PCDH-GAMMA-A10                    | calcium    | integral to | homophili            |
| GI_14196447-I | 93.6   | 90.8   | 81     | PCDHGA10 | <a href="#">NM_032090.1</a> | PCDH-GAMMA-A10                    | calcium    | integral to | homophili            |
| GI_14196450-A | 120.8  | 152.3  | 123.1  | PCDHGA11 | <a href="#">NM_032091.1</a> | PCDH-GAMMA-A11                    | calcium    | integral to | homophili            |

|               |        |        |        |          |                             |                                    |             |             |            |
|---------------|--------|--------|--------|----------|-----------------------------|------------------------------------|-------------|-------------|------------|
| GI_14196450-I | 142.4  | 148.9  | 144.7  | PCDHGA11 | <a href="#">NM_032091.1</a> | PCDH-GAMMA-A11                     | calcium     | integral to | homophili  |
| GI_14196456-A | 109.8  | 118.1  | 121.2  | PCDHGA12 | <a href="#">NM_032094.1</a> | FIB3;CDH21;KIAA0588;PCDH-GAMMA-A12 | calcium     | integral to | homophili  |
| GI_14196458-A | 88.6   | 97.6   | 91.7   | PCDHGA1  | <a href="#">NM_031993.1</a> | PCDH-GAMMA-A1                      | calcium     | integral to | homophili  |
| GI_14196458-I | 99.2   | 97.6   | 86.6   | PCDHGA1  | <a href="#">NM_031993.1</a> | PCDH-GAMMA-A1                      | calcium     | integral to | homophili  |
| GI_14196461-A | 107.7  | 103    | 110    | PCDHGA2  | <a href="#">NM_032009.1</a> | PCDH-GAMMA-A2                      | calcium     | integral to | homophili  |
| GI_14196464-A | 84.1   | 85.6   | 78     | PCDHGA3  | <a href="#">NM_032011.1</a> | PCDH-GAMMA-A3                      | calcium     | integral to | homophili  |
| GI_14196464-I | 95.8   | 93     | 88.1   | PCDHGA3  | <a href="#">NM_032011.1</a> | PCDH-GAMMA-A3                      | calcium     | integral to | homophili  |
| GI_14196467-A | 120.9  | 151.5  | 134.6  | PCDHGA4  | <a href="#">NM_032053.1</a> | PCDH-GAMMA-A4                      | calcium     | integral to | homophili  |
| GI_14196467-I | 103.4  | 122.7  | 108.9  | PCDHGA4  | <a href="#">NM_032053.1</a> | PCDH-GAMMA-A4                      | calcium     | integral to | homophili  |
| GI_14196470-A | 106.9  | 122.3  | 112    | PCDHGA5  | <a href="#">NM_032054.1</a> | ME3;CDH-GAMMA-A5;PCDH-GAMMA-A5     | calcium     | integral to | homophili  |
| GI_14196473-A | 94.6   | 106.6  | 105.9  | PCDHGA6  | <a href="#">NM_032086.1</a> | PCDH-GAMMA-A6                      | calcium     | integral to | homophili  |
| GI_14196476-A | 92.7   | 80.1   | 94.6   | PCDHGA7  | <a href="#">NM_032087.1</a> | PCDH-GAMMA-A7                      | calcium     | integral to | homophili  |
| GI_14196476-I | 88.3   | 92.1   | 77.8   | PCDHGA7  | <a href="#">NM_032087.1</a> | PCDH-GAMMA-A7                      | calcium     | integral to | homophili  |
| GI_14210483-S | 102.8  | 126.4  | 124.2  | GPR145   | <a href="#">NM_032503.1</a> | SLT;MCH2;MCH2R;MCHR2               | receptor    | integral to | G-protein  |
| GI_14210505-S | 764.2  | 485.1  | 362.3  | LOC84524 | <a href="#">NM_032494.1</a> |                                    | nucleic     | nucleus     | regulation |
| GI_14210509-S | 418.7  | 241.9  | 144.7  | ARHGAP9  | <a href="#">NM_032496.1</a> | 10C;RGL1;MGC1295                   |             |             |            |
| GI_14210533-S | 110.5  | 126.4  | 107.4  | KRTAP4-4 | <a href="#">NM_032524.1</a> | KAP4.4;KRTAP4.4                    | receptor    | intermedia  |            |
| GI_14210535-S | 2300   | 2005.3 | 1273.7 | MGC4083  | <a href="#">NM_032525.1</a> | TUBB-5                             | GTP         | microtubul  | microtubul |
| GI_14210537-S | 99.4   | 107.6  | 91.7   | NT5C1A   | <a href="#">NM_032526.1</a> | CN-I;CN1A;CN-IA                    | 5'-         | cytosol     | nucleoside |
| GI_14211539-S | 460.4  | 523.7  | 407.1  | MOV10    | <a href="#">NM_020963.1</a> | KIAA1631                           |             |             |            |
| GI_14211842-S | 1112.7 | 1215.3 | 1107.2 | SCOC     | <a href="#">NM_032547.1</a> | SCOCO;HRIHFB2072                   |             |             |            |
| GI_14211844-S | 418.5  | 514.6  | 461.6  | IMMP2L   | <a href="#">NM_032549.1</a> | IMP2                               |             | mitochond   |            |
| GI_14211848-S | 142.4  | 111    | 104.4  | FKSG79   | <a href="#">NM_032553.1</a> |                                    | rhodopsin-  | integral to | G-protein  |
| GI_14211858-S | 928.2  | 947.4  | 1181.9 | FLJ14753 | <a href="#">NM_032558.1</a> |                                    |             |             |            |
| GI_14211866-S | 97.3   | 112.5  | 104.7  | PLA2G12B | <a href="#">NM_032562.1</a> | FKSG71;GXIIIPLA2                   | calcium-    |             | lipid      |
| GI_14211868-S | 125.1  | 139.3  | 138.4  | SPRL6A   | <a href="#">NM_032563.1</a> | LEP16                              |             |             |            |
| GI_14211872-S | 1871.4 | 1736.8 | 1207.2 | EBRP     | <a href="#">NM_032565.1</a> |                                    | isomerase   | endoplas    |            |
| GI_14211880-S | 138.8  | 125.1  | 136.9  | NAG73    | <a href="#">NM_032570.1</a> |                                    |             |             |            |
| GI_14211888-S | 1594.4 | 1578.9 | 1671.9 | LOC84661 | <a href="#">NM_032574.1</a> |                                    |             | nucleus     |            |
| GI_14211890-S | 155.9  | 171    | 153.4  | GLIS2    | <a href="#">NM_032575.1</a> |                                    |             |             |            |
| GI_14211892-S | 245.9  | 292.1  | 212.1  | CYorf15B | <a href="#">NM_032576.1</a> |                                    |             |             |            |
| GI_14211894-S | 124.1  | 141.3  | 125.3  | FLJ14437 | <a href="#">NM_032578.1</a> |                                    |             |             |            |
| GI_14211896-S | 192.4  | 227.9  | 197.9  | RETNLB   | <a href="#">NM_032579.1</a> | FIZZ1;FIZZ2;HXCP2;RELMb;RELMbeta   | hormone     | cellular_co | cell       |
| GI_14211898-S | 112.1  | 107.6  | 107.1  | HES7     | <a href="#">NM_032580.1</a> |                                    | DNA         | nucleus     | mesoderm   |
| GI_14211906-S | 103.7  | 123.8  | 114    | ZNF347   | <a href="#">NM_032584.1</a> | ZNF1111                            | DNA         | nucleus     | regulation |
| GI_14211918-S | 176.8  | 205    | 189.3  | SLC9A7   | <a href="#">NM_032591.1</a> | NHE7                               | ion         | integral to | sodium     |
| GI_14211920-S | 237.3  | 288    | 241.4  | PHACS    | <a href="#">NM_032592.1</a> | ACS                                | transamin   |             | biosynthes |
| GI_14211922-S | 1049.8 | 1055.7 | 1287.7 | HINT2    | <a href="#">NM_032593.1</a> | HIT-17                             |             |             |            |
| GI_14211926-S | 89.6   | 86.5   | 88     | PPP1R9B  | <a href="#">NM_032595.1</a> | SPINO;PPP1R9                       | transporte  | membran     | transport  |
| GI_14211934-S | 175.3  | 193.1  | 180.8  | NYD-SP18 | <a href="#">NM_032599.1</a> |                                    |             |             |            |
| GI_14211940-S | 102.9  | 99.3   | 93.3   | CX62     | <a href="#">NM_032602.1</a> |                                    | connexon    | connexon    | cell       |
| GI_14211948-S | 291.4  | 369.2  | 357.3  | CREB3L3  | <a href="#">NM_032607.1</a> | CREB-H                             |             |             |            |
| GI_14249118-S | 219    | 258.6  | 221.7  | PEPP-2   | <a href="#">NM_032498.1</a> |                                    | transcripti | nucleus     | regulation |
| GI_14249125-S | 935.4  | 672.1  | 735.9  | GTPBP3   | <a href="#">NM_032620.1</a> | MSS1;MTGP1;THDF1;GTPBG3;FLJ14700   | GTPase      |             | tRNA       |

|               |        |        |                 |                             |                     |           |                          |
|---------------|--------|--------|-----------------|-----------------------------|---------------------|-----------|--------------------------|
| GI_14249127-S | 102.9  | 111.8  | 106.1 LNX       | <a href="#">NM_032622.1</a> | MPDZ                | protein   | intracellula             |
| GI_14249145-S | 132.5  | 123.8  | 124.7 C7orf13   | <a href="#">NM_032625.1</a> | MY040               |           |                          |
| GI_14249149-S | 1483.1 | 2434.9 | 1866.5 SSBP4    | <a href="#">NM_032627.1</a> | MGC3181             |           |                          |
| GI_14249161-S | 105.8  | 112.8  | 105.2 MGC5457   | <a href="#">NM_032633.1</a> |                     |           |                          |
| GI_14249177-S | 663.1  | 696.2  | 840.9 GRCC9     | <a href="#">NM_032641.1</a> | SSB2;SSB-2;MGC2519  | molecular | cellular_co intracellula |
| GI_14249183-S | 280.3  | 303.1  | 289.8 MGC2452   | <a href="#">NM_032644.1</a> |                     |           |                          |
| GI_14249191-S | 123.7  | 157.3  | 126.1 MGC10820  | <a href="#">NM_032648.1</a> |                     |           | kinesin                  |
| GI_14249201-S | 212.9  | 239.3  | 219.7 C21orf122 | <a href="#">NM_032653.1</a> |                     |           |                          |
| GI_14249203-S | 99.8   | 121.3  | 108.9 MGC10981  | <a href="#">NM_032654.1</a> |                     |           |                          |
| GI_14249217-S | 300.3  | 338.3  | 362 MGC5139     | <a href="#">NM_032661.1</a> |                     |           |                          |
| GI_14249219-S | 218.7  | 323.1  | 219.2 MGC10600  | <a href="#">NM_032662.1</a> |                     |           |                          |
| GI_14249231-S | 115.6  | 122.7  | 115.2 MGC4771   | <a href="#">NM_032668.1</a> |                     |           |                          |
| GI_14249237-S | 234    | 222.6  | 256 MGC10814    | <a href="#">NM_032671.1</a> |                     |           |                          |
| GI_14249239-S | 545.1  | 524.3  | 518.8 NSPC1     | <a href="#">NM_032673.1</a> | MGC10882            |           |                          |
| GI_14249251-S | 132.8  | 138.8  | 130.9 ZNF577    | <a href="#">NM_032679.1</a> | MGC4400             | nucleic   | nucleus regulation       |
| GI_14249255-S | 103.5  | 103.1  | 106.2 TRIM51    | <a href="#">NM_032681.1</a> | MGC10977            |           |                          |
| GI_14249259-S | 314.5  | 373.5  | 373.1 MGC12972  | <a href="#">NM_032683.1</a> |                     |           |                          |
| GI_14249265-S | 238.4  | 264.5  | 234.9 MGC13008  | <a href="#">NM_032686.1</a> |                     |           |                          |
| GI_14249273-S | 653    | 708.6  | 670.9 MGC13198  | <a href="#">NM_032690.1</a> |                     |           |                          |
| GI_14249275-S | 319.7  | 369.1  | 326.7 MGC11082  | <a href="#">NM_032691.1</a> |                     |           |                          |
| GI_14249281-S | 127.3  | 124.8  | 124.8 MGC12935  | <a href="#">NM_032694.1</a> |                     |           |                          |
| GI_14249285-S | 105.6  | 114.8  | 99.5 MGC12262   | <a href="#">NM_032696.1</a> |                     |           |                          |
| GI_14249303-S | 1107.8 | 801.2  | 716.9 MGC12966  | <a href="#">NM_032706.1</a> |                     |           |                          |
| GI_14249307-S | 350.7  | 507.8  | 190 C10orf33    | <a href="#">NM_032709.1</a> | FLJ23849;MGC13047   | oxidoredu | electron                 |
| GI_14249309-S | 925.4  | 1095.5 | 899.7 MGC13053  | <a href="#">NM_032710.1</a> |                     |           |                          |
| GI_14249311-S | 143.4  | 155.2  | 200.6 MGC13090  | <a href="#">NM_032711.1</a> |                     |           |                          |
| GI_14249315-S | 223.8  | 231.6  | 348.2 MGC13251  | <a href="#">NM_032714.1</a> |                     |           |                          |
| GI_14249355-S | 89.8   | 103.4  | 94.5 MGC13168   | <a href="#">NM_032735.1</a> |                     | molecular |                          |
| GI_14249363-S | 273.6  | 410.3  | 368.4 MGC5370   | <a href="#">NM_032739.1</a> |                     |           |                          |
| GI_14249371-S | 103.2  | 104.9  | 109.1 C6orf105  | <a href="#">NM_032744.1</a> | MGC12335;dJ413H6.1  |           |                          |
| GI_14249373-S | 102.8  | 96.4   | 86 MGC12538     | <a href="#">NM_032746.1</a> |                     |           |                          |
| GI_14249375-S | 197.3  | 195.6  | 100 USMG5       | <a href="#">NM_032747.1</a> | MGC14697;bA792D24.4 |           |                          |
| GI_14249381-S | 3636.1 | 3172.1 | 3471.4 MGC15429 | <a href="#">NM_032750.1</a> |                     | catalytic | nucleus                  |
| GI_14249383-S | 242.7  | 370.6  | 459.3 C14orf128 | <a href="#">NM_032751.1</a> |                     |           |                          |
| GI_14249385-S | 227.4  | 263.6  | 210.3 ZNF496    | <a href="#">NM_032752.1</a> | MGC15548            |           |                          |
| GI_14249391-S | 162.9  | 182.9  | 198.2 MGC15634  | <a href="#">NM_032755.1</a> |                     |           |                          |
| GI_14249393-S | 118.3  | 129.1  | 118 MGC15668    | <a href="#">NM_032756.1</a> |                     |           |                          |
| GI_14249395-S | 90.6   | 93.5   | 93.9 MGC15705   | <a href="#">NM_032757.1</a> |                     |           |                          |
| GI_14249407-S | 99.5   | 101.5  | 86.9 MGC16142   | <a href="#">NM_032763.1</a> |                     |           |                          |
| GI_14249413-S | 159.2  | 152.6  | 145.3 MGC16179  | <a href="#">NM_032766.1</a> |                     |           |                          |
| GI_14249445-S | 198.4  | 256.3  | 207.5 FLJ14431  | <a href="#">NM_032783.1</a> |                     | oxidoredu | metabolis                |
| GI_14249449-S | 101.1  | 111.1  | 102.5 FLJ14442  | <a href="#">NM_032785.1</a> |                     | carboxype | proteolysis              |
| GI_14249451-S | 292.4  | 244.8  | 215.7 FLJ14451  | <a href="#">NM_032786.1</a> |                     | nucleic   |                          |
| GI_14249453-S | 75.1   | 74.8   | 69.5 GPR128     | <a href="#">NM_032787.1</a> | FLJ14454            | G-protein | membran neuropepti       |



|               |        |        |        |           |                             |                                      |             |             |             |
|---------------|--------|--------|--------|-----------|-----------------------------|--------------------------------------|-------------|-------------|-------------|
| GI_14249455-S | 91.3   | 110.5  | 84.3   | ZNF514    | <a href="#">NM_032788.1</a> | FLJ14457                             | nucleic     | nucleus     | regulation  |
| GI_14249457-S | 730.9  | 820.4  | 670.5  | FLJ14464  | <a href="#">NM_032789.1</a> |                                      |             |             |             |
| GI_14249467-I | 1788.4 | 2103.4 | 1800.6 | C6orf29   | <a href="#">NM_032794.1</a> | CTL4;NG22;FLJ14491                   |             |             |             |
| GI_14249469-S | 631    | 636.7  | 583.8  | FLJ14494  | <a href="#">NM_032795.1</a> |                                      | pseudouri   |             |             |
| GI_14249477-S | 440.7  | 473.9  | 605.4  | FLJ14525  | <a href="#">NM_032800.1</a> | MGC10710                             |             |             |             |
| GI_14249487-S | 163.3  | 217.1  | 201.9  | ZNF206    | <a href="#">NM_032805.1</a> | FLJ14549                             | transcripti | nucleus     | regulation  |
| GI_14249499-S | 111.8  | 110.8  | 114.5  | TBRG1     | <a href="#">NM_032811.1</a> | TB-5;FLJ14621                        | DNA         | nucleus     |             |
| GI_14249503-S | 241.1  | 215.5  | 158    | FLJ14624  | <a href="#">NM_032813.1</a> |                                      |             |             |             |
| GI_14249505-S | 98.5   | 98.7   | 92.8   | FLJ14627  | <a href="#">NM_032814.1</a> |                                      |             |             |             |
| GI_14249511-S | 96.5   | 82.8   | 75.7   | FLJ14641  | <a href="#">NM_032817.1</a> |                                      |             |             |             |
| GI_14249513-S | 126.1  | 154    | 163.6  | C9orf100  | <a href="#">NM_032818.1</a> | FLJ14642;MGC44886                    |             |             |             |
| GI_14249519-S | 1216.7 | 938.1  | 974.3  | FLJ14668  | <a href="#">NM_032822.1</a> |                                      | odorant     |             | transport   |
| GI_14249523-S | 129.5  | 152.9  | 135.3  | FLJ14681  | <a href="#">NM_032824.1</a> |                                      | phospholi   |             | lipid       |
| GI_14249531-S | 157.6  | 153.4  | 134.6  | ZNF587    | <a href="#">NM_032828.1</a> | ZF6;UBF-fi;FLJ14710;FLJ20813         |             |             |             |
| GI_14249533-S | 189.4  | 236.8  | 215    | FLJ14721  | <a href="#">NM_032829.1</a> |                                      |             |             |             |
| GI_14249535-S | 5331   | 3997.8 | 3480.2 | CIRH1A    | <a href="#">NM_032830.1</a> | NAIC;CIRHIN;TEX292;FLJ14728;KIAA1988 |             |             |             |
| GI_14249537-S | 416.9  | 563.6  | 582.3  | C7orf19   | <a href="#">NM_032831.1</a> | CBCIP2;FLJ12474;FLJ14733             |             |             |             |
| GI_14249549-S | 1166.9 | 1359.9 | 962.2  | FLJ14775  | <a href="#">NM_032837.1</a> |                                      | DNA         | nucleus     | regulation  |
| GI_14249551-S | 1031.4 | 1057.1 | 1150.3 | DIRC2     | <a href="#">NM_032839.1</a> | RCC4;FLJ14784                        |             |             |             |
| GI_14249553-S | 659.7  | 606.5  | 981.9  | FLJ14800  | <a href="#">NM_032840.1</a> |                                      | hormone     | extracellul | developm    |
| GI_14249557-S | 1510.5 | 1109.7 | 958.3  | FLJ14803  | <a href="#">NM_032842.1</a> |                                      |             |             |             |
| GI_14249561-S | 349.6  | 377.1  | 405    | MASTL     | <a href="#">NM_032844.1</a> | THC2;FLJ14813                        | ATP         |             | protein     |
| GI_14249563-S | 99.7   | 104.6  | 102.5  | FLJ14816  | <a href="#">NM_032845.1</a> |                                      | DNA         | nucleus     | regulation  |
| GI_14249567-S | 1636.1 | 1747.5 | 1445.5 | FLJ14825  | <a href="#">NM_032847.1</a> |                                      |             |             |             |
| GI_14249569-S | 2840.3 | 2584.5 | 2381   | FLJ14827  | <a href="#">NM_032848.1</a> |                                      |             |             |             |
| GI_14249581-S | 111.6  | 156.2  | 86.4   | FLJ14871  | <a href="#">NM_032854.1</a> |                                      |             |             |             |
| GI_14249585-S | 315.8  | 330    | 287.3  | FLJ14888  | <a href="#">NM_032856.1</a> |                                      |             |             |             |
| GI_14249589-S | 103.9  | 97.4   | 96.6   | FLJ14904  | <a href="#">NM_032858.1</a> |                                      |             |             |             |
| GI_14249591-S | 90.4   | 81.9   | 83.6   | FLJ14906  | <a href="#">NM_032859.1</a> |                                      |             |             |             |
| GI_14249607-S | 136    | 118.5  | 143.1  | FLJ14966  | <a href="#">NM_032867.1</a> |                                      |             |             |             |
| GI_14249613-S | 251.2  | 194.1  | 127.9  | JFC1      | <a href="#">NM_032872.1</a> | FLJ14996                             |             |             |             |
| GI_14249619-S | 544.3  | 659.8  | 605.9  | MGC15482  | <a href="#">NM_032875.1</a> |                                      | electron    |             | electron    |
| GI_14249631-S | 579    | 632.8  | 596.3  | LSM10     | <a href="#">NM_032881.1</a> | MGC15749                             | pre-mRNA    | small       | mRNA        |
| GI_14249635-S | 9711.1 | 6405.1 | 9361.9 | C20orf100 | <a href="#">NM_032883.1</a> | MGC15880;dJ495O3.1;dJ1108D11.2       | DNA         | nucleus     | regulation  |
| GI_14249641-S | 124.9  | 119.9  | 121.6  | MGC15912  | <a href="#">NM_032886.1</a> |                                      |             |             |             |
| GI_14249643-S | 165.1  | 178.2  | 155.3  | MGC16037  | <a href="#">NM_032887.1</a> |                                      |             |             |             |
| GI_14249653-S | 420    | 349.3  | 245.4  | MGC14161  | <a href="#">NM_032892.1</a> |                                      |             |             |             |
| GI_14249657-S | 959.4  | 782.4  | 459.6  | MGC14376  | <a href="#">NM_032895.1</a> |                                      | translation | cytoskelet  | translation |
| GI_14249661-S | 89.6   | 96     | 97.9   | MGC14436  | <a href="#">NM_032897.1</a> |                                      |             |             |             |
| GI_14249683-S | 108.9  | 111.5  | 98     | MGC14407  | <a href="#">NM_032908.1</a> |                                      |             |             |             |
| GI_14249687-S | 421    | 567.6  | 519.8  | C21orf119 | <a href="#">NM_032910.1</a> |                                      |             |             |             |
| GI_14249699-S | 304.9  | 263    | 259.4  | MGC16279  | <a href="#">NM_032916.1</a> |                                      |             |             |             |
| GI_14249701-S | 117.9  | 124.2  | 111.6  | MGC2848   | <a href="#">NM_032917.1</a> |                                      |             |             |             |
| GI_14249703-S | 201.1  | 198.6  | 175    | RERG      | <a href="#">NM_032918.1</a> | MGC15754                             | RAS small   |             | small       |

|               |         |        |        |           |                             |                                      |            |              |             |
|---------------|---------|--------|--------|-----------|-----------------------------|--------------------------------------|------------|--------------|-------------|
| GI_14249705-S | 324.8   | 358.6  | 327.3  | C21orf124 | <a href="#">NM_032920.1</a> | PRED79;FLJ31940;MGC15873             |            |              |             |
| GI_14249707-A | 380     | 470    | 369.7  | MGC15875  | <a href="#">NM_032921.1</a> | MGC45484                             |            |              |             |
| GI_14249725-S | 89      | 213.6  | 150.4  | MGC13040  | <a href="#">NM_032930.1</a> |                                      |            |              |             |
| GI_14249741-S | 96.7    | 92.4   | 100.3  | LOC84664  | <a href="#">NM_032577.1</a> |                                      |            |              |             |
| GI_14251204-S | 88      | 106.7  | 97.3   | HRH4      | <a href="#">NM_021624.2</a> | H4;H4R;BG26;HH4R;AXOR35;GPRv53;GPC   | histamine  | integral to  | G-protein   |
| GI_14251206-S | 170     | 202.4  | 181.3  | MOV10L1   | <a href="#">NM_018995.1</a> | DJ402G11.8;DKFZp434B0717             | ATP        | intracellula | developm    |
| GI_14251208-S | 7059.3  | 7848.3 | 7807.2 | CLIC1     | <a href="#">NM_001288.3</a> | G6;NCC27                             | chloride   | nuclear      | small       |
| GI_14251210-S | 447.8   | 764    | 665.2  | MCCC2     | <a href="#">NM_022132.3</a> | MCCB                                 | biotin     | mitochond    | leucine     |
| GI_14251211-S | 307.8   | 302.8  | 243    | DDX20     | <a href="#">NM_007204.3</a> | DP103;GEMIN3;DKFZP434H052            | ATP        | cytoskelet   | assembly    |
| GI_14251213-S | 1094.4  | 1658.3 | 1504.5 | DDX24     | <a href="#">NM_020414.3</a> |                                      |            |              |             |
| GI_14251214-S | 308.3   | 186.4  | 183.5  | KLF5      | <a href="#">NM_001730.2</a> | CKLF;IKLF;BTEB2                      | RNA        | nucleus      | transcripti |
| GI_14251216-S | 617     | 717    | 584.2  | CRYZ      | <a href="#">NM_001889.2</a> |                                      | alcohol    |              | vision      |
| GI_14251217-S | 114.7   | 125.3  | 111.5  | CRYBA1    | <a href="#">NM_005208.3</a> | CRYB1                                | structural |              | vision      |
| GI_14269577-S | 218     | 280.9  | 274.7  | MT4       | <a href="#">NM_032935.1</a> | MTIV                                 | copper ion | cytoplasm    | biological_ |
| GI_14270477-I | 126.9   | 141.3  | 160.7  | GPS2      | <a href="#">NM_032442.1</a> | AMF-1;KIAA1787                       | GTPase     |              | JNK         |
| GI_14270480-A | 108.6   | 128.6  | 112.5  | GPS2      | <a href="#">NM_032938.1</a> | AMF-1;KIAA1787                       | GTPase     |              | JNK         |
| GI_14270482-A | 124.7   | 129.8  | 124.8  | PCDHGA8   | <a href="#">NM_014004.2</a> | KIAA0327;PCDH-GAMMA-A8               | calcium    | integral to  | homophili   |
| GI_14270482-I | 76.8    | 88.2   | 82.8   | PCDHGA8   | <a href="#">NM_014004.2</a> | KIAA0327;PCDH-GAMMA-A8               | calcium    | integral to  | homophili   |
| GI_14270486-A | 264.1   | 346.8  | 299.6  | PCDHGA9   | <a href="#">NM_032089.1</a> | PCDH-GAMMA-A9                        | calcium    | integral to  | homophili   |
| GI_14270489-A | 200.2   | 242.4  | 210.8  | PCDHGB1   | <a href="#">NM_032095.1</a> | PCDH-GAMMA-B1                        | calcium    | integral to  | homophili   |
| GI_14270492-A | 103.4   | 114.8  | 123.3  | PCDHGB2   | <a href="#">NM_032096.1</a> | PCDH-GAMMA-B2                        | calcium    | integral to  | homophili   |
| GI_14270495-A | 105.2   | 111.9  | 108.1  | PCDHGB3   | <a href="#">NM_032097.1</a> | PCDH-GAMMA-B3                        | calcium    | integral to  | homophili   |
| GI_14270498-A | 297.7   | 317.5  | 287.5  | PCDHGB4   | <a href="#">NM_032098.1</a> | FIB2;CDH20;PCDH-GAMMA-B4             | calcium-   | membran      | cell        |
| GI_14270501-A | 96.1    | 103.8  | 95.9   | PCDHGB6   | <a href="#">NM_032100.1</a> | PCDH-GAMMA-B6                        | calcium    | integral to  | homophili   |
| GI_14270504-A | 114.1   | 125.6  | 118.6  | PCDHGB5   | <a href="#">NM_032099.1</a> | PCDH-GAMMA-B5                        | calcium    | integral to  | homophili   |
| GI_14270504-I | 91.4    | 93     | 81.4   | PCDHGB5   | <a href="#">NM_032099.1</a> | PCDH-GAMMA-B5                        | calcium    | integral to  | homophili   |
| GI_14270507-A | 110.1   | 123.9  | 106.3  | PCDHGB7   | <a href="#">NM_032101.1</a> | ME6;PCDH-GAMMA-B7                    | calcium    | integral to  | homophili   |
| GI_14270507-I | 82.6    | 84.6   | 81.7   | PCDHGB7   | <a href="#">NM_032101.1</a> | ME6;PCDH-GAMMA-B7                    | calcium    | integral to  | homophili   |
| GI_14277673-S | 228.6   | 341.3  | 198.8  | LMCD1     | <a href="#">NM_014583.2</a> |                                      | molecular  | cellular_co  | biological_ |
| GI_14277676-I | 178.3   | 193.4  | 194    | PCDHGC3   | <a href="#">NM_032402.1</a> | PC43;PCDH2;PCDH-GAMMA-C3             |            |              |             |
| GI_14277678-A | 120.8   | 127.4  | 107.4  | PCDHGC3   | <a href="#">NM_032403.1</a> | PC43;PCDH2;PCDH-GAMMA-C3             |            |              |             |
| GI_14277681-A | 166.2   | 191    | 184.4  | PCDHGC4   | <a href="#">NM_032406.1</a> | PCDH-GAMMA-C4                        | calcium    | integral to  | homophili   |
| GI_14277681-I | 104.2   | 109.7  | 105    | PCDHGC4   | <a href="#">NM_032406.1</a> | PCDH-GAMMA-C4                        | calcium    | integral to  | homophili   |
| GI_14277684-A | 95.5    | 88.8   | 93.5   | PCDHGC5   | <a href="#">NM_032407.1</a> | PCDH-GAMMA-C5                        | calcium    | integral to  | homophili   |
| GI_14277684-I | 98.1    | 108.8  | 97.6   | PCDHGC5   | <a href="#">NM_032407.1</a> | PCDH-GAMMA-C5                        | calcium    | integral to  | homophili   |
| GI_14277687-S | 141.5   | 162.9  | 123.3  | TEX13A    | <a href="#">NM_031274.2</a> |                                      |            |              |             |
| GI_14277688-S | 96.7    | 95.1   | 108.8  | TEX15     | <a href="#">NM_031271.2</a> | DKFZP434M2415                        |            |              |             |
| GI_14277689-S | 173.5   | 262.9  | 185.8  | C6orf32   | <a href="#">NM_015864.2</a> | PL48;DIFF40;DIFF48;KIAA0386          |            |              |             |
| GI_14277693-I | 103     | 102.5  | 94.9   | NXF2      | <a href="#">NM_017809.2</a> | TAPL-2;FLJ20416                      | protein    | nucleus      | protein-    |
| GI_14277695-A | 108.2   | 96.2   | 100.4  | RNF17     | <a href="#">NM_031994.1</a> | Mmip-2                               |            |              |             |
| GI_14277695-I | 103.2   | 113.9  | 103.1  | RNF17     | <a href="#">NM_031994.1</a> | Mmip-2                               |            |              |             |
| GI_14277699-S | 31646.9 | 33058  | 23463  | RPS12     | <a href="#">NM_001016.2</a> |                                      | structural | cytosolic    | protein     |
| GI_14277701-A | 161.7   | 172    | 187.2  | APBA2BP   | <a href="#">NM_031231.1</a> | NIP1;XB51;EFCBP3;NECAB3;SYTIP2;dJ63M |            |              |             |
| GI_14456711-S | 106.5   | 120.7  | 114    | HBA1      | <a href="#">NM_000558.3</a> |                                      | protein    | hemoglobi    | oxygen      |

|               |        |        |        |         |                             |                                |             |                        |
|---------------|--------|--------|--------|---------|-----------------------------|--------------------------------|-------------|------------------------|
| GI_14456712-S | 115.3  | 169.2  | 144.4  | HBQ1    | <a href="#">NM_005331.3</a> | globin                         | hemoglobi   | oxygen                 |
| GI_14550404-S | 375.2  | 477.1  | 416.1  | RAD18   | <a href="#">NM_020165.2</a> | RNF73                          | damaged     | nucleus response       |
| GI_14550413-S | 120    | 128    | 123.7  | IRTA2   | <a href="#">NM_031281.1</a> | BXMAS1                         | receptor    |                        |
| GI_14550415-S | 150    | 181.1  | 168    | IRTA1   | <a href="#">NM_031282.1</a> |                                |             |                        |
| GI_14574565-A | 128.7  | 136    | 117.4  | AIF1    | <a href="#">NM_032955.1</a> | IBA1;AIF-1;IRT-1               | nucleus     | cell cycle             |
| GI_14574565-I | 217.7  | 249.6  | 230    | AIF1    | <a href="#">NM_032955.1</a> | IBA1;AIF-1;IRT-1               | nucleus     | cell cycle             |
| GI_14574567-I | 203.2  | 234.1  | 211.4  | AIF1    | <a href="#">NM_001623.3</a> | IBA1;AIF-1;IRT-1               | nucleus     | cell cycle             |
| GI_14574569-S | 150.8  | 175.3  | 142.5  | BAG4    | <a href="#">NM_004874.2</a> | SODD;BAG-4                     | apoptosis   | anti-                  |
| GI_14574570-S | 189.9  | 124.2  | 153.4  | BCL2A1  | <a href="#">NM_004049.2</a> | GRS;BFL1;HBPA1;BCL2L5          | apoptosis   | anti-                  |
| GI_14574571-S | 303    | 284.3  | 298.6  | BCL2L2  | <a href="#">NM_004050.2</a> | BCLW;BCL-W;KIAA0271            | apoptosis   | anti-                  |
| GI_14577915-S | 99.9   | 111    | 120.9  | EBI2    | <a href="#">NM_004951.2</a> |                                | G-protein   | integral to virulence  |
| GI_14577916-S | 181.7  | 202.8  | 147.3  | EBI3    | <a href="#">NM_005755.2</a> |                                | receptor    | membran humoral        |
| GI_14577918-S | 99.2   | 121.6  | 94.3   | C4A     | <a href="#">NM_007293.1</a> | C4S;CO4                        | compleme    | extracellul compleme   |
| GI_14577920-S | 87.1   | 97.6   | 88.1   | C4B     | <a href="#">NM_000592.3</a> | C4F;CO4                        | compleme    | extracellul compleme   |
| GI_14577927-S | 3746.7 | 4378.8 | 2399.1 | TRIM16  | <a href="#">NM_006470.2</a> | EBBP                           | transcripti | cytoplasm              |
| GI_14577931-I | 94.8   | 117.7  | 102.1  | DNAH9   | <a href="#">NM_001372.2</a> | DYH9;HL20;DNAL1;DNEL1;HL-      | adenosine   | cytoskelet spermatog   |
| GI_14589846-S | 129.2  | 163    | 151.2  | SEC61A2 | <a href="#">NM_018144.2</a> | FLJ10578                       | protein     | integral to protein    |
| GI_14589848-S | 129.4  | 199    | 143    | GNGT2   | <a href="#">NM_031498.1</a> | GNG8;GNG9;GNGT8;G-GAMMA-8;G-   | signal      | heterotrim phototrans  |
| GI_14589850-S | 479.9  | 633    | 528.4  | KCNK2   | <a href="#">NM_014217.1</a> | TREK;TPKC1;TREK-1              | outward     | voltage- potassium     |
| GI_14589853-A | 418.9  | 454.4  | 319.8  | PTP4A3  | <a href="#">NM_007079.2</a> | PRL3;PRL-3;PRL-R               | prenylated  |                        |
| GI_14589855-I | 99.3   | 113.4  | 90.5   | PTP4A3  | <a href="#">NM_032611.1</a> | PRL3;PRL-3;PRL-R               | prenylated  |                        |
| GI_14589858-A | 178.3  | 193.2  | 145.5  | ASPH    | <a href="#">NM_020164.2</a> | BAH;HAAH;JCTN;CASQ2BP1         | peptide-    | endoplas muscle        |
| GI_14589859-I | 3916.6 | 3794.5 | 2952.4 | ASPH    | <a href="#">NM_032466.1</a> | BAH;HAAH;JCTN;CASQ2BP1         | peptide-    | endoplas muscle        |
| GI_14589865-I | 181.5  | 198.6  | 168.6  | ASPH    | <a href="#">NM_004318.2</a> | BAH;HAAH;JCTN;CASQ2BP1         | peptide-    | endoplas muscle        |
| GI_14589867-A | 91.1   | 96.5   | 81.2   | BLR1    | <a href="#">NM_001716.2</a> | CXCR5;MDR15                    | G-protein   | integral to G-protein  |
| GI_14589867-I | 135    | 152.6  | 131.1  | BLR1    | <a href="#">NM_001716.2</a> | CXCR5;MDR15                    | G-protein   | integral to G-protein  |
| GI_14589868-I | 101.7  | 107.6  | 96.1   | BLR1    | <a href="#">NM_032966.1</a> | CXCR5;MDR15                    | G-protein   | integral to G-protein  |
| GI_14589873-A | 492.3  | 499.5  | 506.1  | DOM3Z   | <a href="#">NM_032419.1</a> | NG6;DOM3L                      |             |                        |
| GI_14589875-A | 288.7  | 344.6  | 333.3  | EFS     | <a href="#">NM_032459.1</a> | SIN;EFS1;EFS2;HEFS             | cell        | cytoplasm intracellula |
| GI_14589877-I | 196.7  | 225.7  | 201.6  | EFS     | <a href="#">NM_005864.2</a> | SIN;EFS1;EFS2;HEFS             | cell        | cytoplasm intracellula |
| GI_14589887-S | 106.4  | 125.1  | 106.6  | CDH1    | <a href="#">NM_004360.2</a> | UVO;CDHE;ECAD;LCAM             | calcium-    |                        |
| GI_14589888-S | 2844.1 | 3461.9 | 3592.9 | CDH2    | <a href="#">NM_001792.2</a> | CDHN;NCAD                      | cell        | integral to cell       |
| GI_14589892-S | 188.9  | 194.3  | 208.4  | CDH4    | <a href="#">NM_001794.2</a> | CAD4;RCAD                      | calcium-    | plasma cell            |
| GI_14589894-S | 113.2  | 130.5  | 112.9  | CDH5    | <a href="#">NM_001795.2</a> | 7B4                            | calcium-    | integral to homophili  |
| GI_14589898-S | 2008   | 2115   | 2105.4 | MAP2K1  | <a href="#">NM_002755.2</a> | MEK1;MKK1;MAPKK1;PRKMK1        | MAP         | chemotaxi              |
| GI_14589899-I | 93.6   | 119.2  | 132.2  | MAP2K6  | <a href="#">NM_002758.2</a> | MEK6;MKK6;MAPKK6;PRKMK6;SAPKK3 | MAP         | DNA                    |
| GI_14589901-A | 96.9   | 107.9  | 100.9  | MAP2K6  | <a href="#">NM_031988.1</a> | MEK6;MKK6;MAPKK6;PRKMK6;SAPKK3 | MAP         | DNA                    |
| GI_14589901-I | 109.2  | 124.2  | 113    | MAP2K6  | <a href="#">NM_031988.1</a> | MEK6;MKK6;MAPKK6;PRKMK6;SAPKK3 | MAP         | DNA                    |
| GI_14589910-A | 131    | 112.7  | 122.7  | MMP28   | <a href="#">NM_024302.2</a> | MM28;MMP25                     |             |                        |
| GI_14589913-A | 128    | 117.6  | 115.1  | PCDH10  | <a href="#">NM_020815.1</a> | PCDH19;OL-                     |             |                        |
| GI_14589913-I | 89.4   | 93.2   | 84.4   | PCDH10  | <a href="#">NM_020815.1</a> | PCDH19;OL-                     |             |                        |
| GI_14589915-I | 93.2   | 93.1   | 93.1   | PCDH10  | <a href="#">NM_032961.1</a> | PCDH19;OL-                     |             |                        |
| GI_14589925-S | 112.7  | 116.9  | 112.4  | PCDH12  | <a href="#">NM_016580.2</a> | VECAD2;VE-cadherin-2           | cell        | cytoskelet neuronal    |
| GI_14589926-S | 99.4   | 102.2  | 104.5  | PCDH17  | <a href="#">NM_014459.2</a> | PCH68;PCDH68                   | calcium     | membran homophili      |

|               |         |        |        |         |                             |                                     |            |             |              |
|---------------|---------|--------|--------|---------|-----------------------------|-------------------------------------|------------|-------------|--------------|
| GI_14589930-A | 200.6   | 258.9  | 226.3  | PCDH7   | <a href="#">NM_002589.2</a> | BHPCDH;BH-Pcdh                      | calcium    | integral to | homophili    |
| GI_14589930-I | 129.4   | 176.3  | 172.4  | PCDH7   | <a href="#">NM_002589.2</a> | BHPCDH;BH-Pcdh                      | calcium    | integral to | homophili    |
| GI_14589932-I | 78.5    | 80     | 73.2   | PCDH7   | <a href="#">NM_032456.1</a> | BHPCDH;BH-Pcdh                      | calcium    | integral to | homophili    |
| GI_14589934-I | 176.2   | 208.1  | 194.3  | PCDH7   | <a href="#">NM_032457.1</a> | BHPCDH;BH-Pcdh                      | calcium    | integral to | homophili    |
| GI_14589936-A | 146     | 186    | 150.5  | PCDH8   | <a href="#">NM_032949.1</a> | PAPC;ARCADLIN                       | calcium-   | integral to | cell-cell    |
| GI_14589941-A | 89.8    | 95.8   | 84.2   | PCDH11Y | <a href="#">NM_032971.1</a> | PCDHY;PCDH22                        |            |             |              |
| GI_14589941-I | 93.9    | 98.4   | 94.2   | PCDH11Y | <a href="#">NM_032971.1</a> | PCDHY;PCDH22                        |            |             |              |
| GI_14589945-I | 90.4    | 118    | 93.3   | PCDH11Y | <a href="#">NM_032973.1</a> | PCDHY;PCDH22                        |            |             |              |
| GI_14589948-S | 1649.8  | 1819.8 | 1601.1 | POLR2A  | <a href="#">NM_000937.2</a> | RPB1;RPO2;POLR2;POLRA;RPBh1;RPOL2;  | DNA-       | DNA-        | transcripti  |
| GI_14589949-S | 574.6   | 511.8  | 504.9  | POLR2D  | <a href="#">NM_004805.2</a> | RBP4;HSRBP4;HSRPB4                  | DNA-       | DNA-        | transcripti  |
| GI_14589950-S | 2074.1  | 2169.6 | 2236.2 | POLR2E  | <a href="#">NM_002695.2</a> | RPB5;XAP4;RPABC1;hRPB25;hsRPB5      | DNA-       | DNA-        | transcripti  |
| GI_14589952-S | 6926    | 6743.4 | 5153.8 | POLR2H  | <a href="#">NM_006232.2</a> | RPB8;RPB17;RPABC3;hsRPB8            | DNA-       | DNA-        | transcripti  |
| GI_14589954-S | 1900.4  | 1541.6 | 1634.4 | POLR2I  | <a href="#">NM_006233.3</a> | RPB9;hsRPB9;hRPB14.5                | DNA-       | DNA-        | transcripti  |
| GI_14589955-S | 2293.2  | 2756.8 | 2592.8 | POLR2K  | <a href="#">NM_005034.2</a> | RPB12;RPABC4;RPB7.0;hRPB7.0;hsRPB10 | zinc ion   | DNA-        | regulation   |
| GI_14589957-S | 499.1   | 444.5  | 609.3  | POLR3K  | <a href="#">NM_016310.2</a> | C11;RPC10;RPC11;hRPC11              | DNA-       | DNA-        | transcripti  |
| GI_14591901-A | 462.5   | 550.9  | 438.5  | RECQL   | <a href="#">NM_032941.1</a> | RecQ1;RECQL1                        | DNA        | nucleus     | DNA          |
| GI_14591903-I | 269.5   | 375.6  | 251.4  | RECQL   | <a href="#">NM_002907.2</a> | RecQ1;RECQL1                        | DNA        | nucleus     | DNA          |
| GI_14591905-S | 27596   | 25323  | 22605  | RPL13A  | <a href="#">NM_012423.2</a> |                                     | structural | large       | protein      |
| GI_14591906-S | 4921.4  | 4166.9 | 2291.9 | RPL17   | <a href="#">NM_000985.2</a> | rpL23                               | structural | ribosome    |              |
| GI_14591907-S | 25257.9 | 23409  | 17461  | RPL23   | <a href="#">NM_000978.2</a> | rpL17                               | structural | ribosome    | protein      |
| GI_14591908-S | 18153.7 | 15942  | 12511  | RPL5    | <a href="#">NM_000969.2</a> | MSTP030                             | structural | cytosolic   | protein      |
| GI_14591910-S | 11588.8 | 11010  | 8741.8 | RPS13   | <a href="#">NM_001017.2</a> |                                     | structural | cytosolic   | protein      |
| GI_14591911-S | 4086.4  | 3650.3 | 3033.9 | RPS15   | <a href="#">NM_001018.2</a> | RIG                                 | structural | cytosolic   | protein      |
| GI_14591913-S | 16250.4 | 14912  | 10724  | RPS17   | <a href="#">NM_001021.2</a> | RPS17L1;RPS17L2                     | structural | cytosolic   | protein      |
| GI_14591914-S | 23532.8 | 21220  | 17363  | RPS19   | <a href="#">NM_001022.2</a> | DBA                                 | structural | cytosolic   | hemocyte     |
| GI_14591915-S | 24286.3 | 22844  | 18407  | RPS20   | <a href="#">NM_001023.2</a> |                                     | structural | cytosolic   | protein      |
| GI_14591916-S | 22173.9 | 21345  | 17584  | RPS25   | <a href="#">NM_001028.2</a> |                                     | structural | cytosolic   | protein      |
| GI_14591917-S | 862.6   | 816.3  | 829.9  | SEC13L  | <a href="#">NM_031216.2</a> | Seh1;SEH1A;SEH1B                    | porin      | mitochond   | intracellula |
| GI_14591918-S | 648.3   | 643    | 597.4  | SEC22L2 | <a href="#">NM_012430.2</a> | SEC22A                              | vesicle    | endoplas    | ER to        |
| GI_14591930-S | 558.5   | 662.8  | 514    | COG3    | <a href="#">NM_031431.2</a> | SEC34                               |            |             |              |
| GI_14591931-S | 1291.2  | 1819.1 | 1391.4 | SEC61A1 | <a href="#">NM_013336.2</a> | HSEC61                              |            |             |              |
| GI_14591932-S | 868.6   | 1366.4 | 1200.2 | SEC61B  | <a href="#">NM_006808.2</a> |                                     | protein    | integral to | nonselecti   |
| GI_14591933-S | 3920.3  | 6027.6 | 3952   | SEC61G  | <a href="#">NM_014302.2</a> | SSS1                                | protein    | endoplas    | protein      |
| GI_14591934-S | 644.9   | 853.7  | 517.3  | SEC63   | <a href="#">NM_007214.2</a> | SEC63L;PRO2507                      | endoplas   | endoplas    | protein-     |
| GI_14600335-S | 146.5   | 151    | 141.7  | PCDHB9  | <a href="#">NM_019119.3</a> | PCDH3H;PCDH-BETA9                   | calcium-   | integral to | synaptoge    |
| GI_14602425-S | 1779    | 1694   | 1733.8 | TLOC1   | <a href="#">NM_003262.2</a> | HTP1;Dtrp1;SEC62                    | endoplas   | integral to | cotranslati  |
| GI_14602426-I | 175.7   | 204    | 186.3  | ZWINT   | <a href="#">NM_032997.1</a> | HZwint-1                            |            |             | kinesin      |
| GI_14602428-A | 294.4   | 276.2  | 390.1  | ZWINT   | <a href="#">NM_007057.2</a> | HZwint-1                            |            |             | kinesin      |
| GI_14602440-A | 99.3    | 104.8  | 106.1  | WBSCR14 | <a href="#">NM_032994.1</a> | MIO;CHREBP;MONDOB;WS-bHLH           | DNA        | transcripti | embryoge     |
| GI_14602442-A | 96.7    | 112.4  | 89.4   | STK31   | <a href="#">NM_031414.2</a> |                                     | cAMP-      |             | protein      |
| GI_14602442-I | 100.5   | 120.1  | 117.1  | STK31   | <a href="#">NM_031414.2</a> |                                     | cAMP-      |             | protein      |
| GI_14602444-I | 241.9   | 290.3  | 278.7  | STK31   | <a href="#">NM_032944.1</a> |                                     | cAMP-      |             | protein      |
| GI_14602451-S | 4071.5  | 4143.1 | 3981.9 | POLR2F  | <a href="#">NM_021974.2</a> | RPB6;RPABC2;hsRPB6;HRBP14.4;hRPB14. | DNA-       | DNA-        | transcripti  |
| GI_14602452-I | 96.3    | 93.9   | 90     | TMPRSS3 | <a href="#">NM_032401.1</a> | DFNB8;DFNB10;ECHOS1;TADG12          | trypsin    | integral to | proteolysis  |

|               |         |        |        |         |                             |                                     |             |              |             |
|---------------|---------|--------|--------|---------|-----------------------------|-------------------------------------|-------------|--------------|-------------|
| GI_14602454-I | 216.6   | 287.4  | 260.6  | TMPRSS3 | <a href="#">NM_032404.1</a> | DFNB8;DFNB10;ECHOS1;TADG12          | trypsin     | integral to  | proteolysis |
| GI_14602456-A | 127.4   | 161.1  | 124.9  | TMPRSS3 | <a href="#">NM_032405.1</a> | DFNB8;DFNB10;ECHOS1;TADG12          | trypsin     | integral to  | proteolysis |
| GI_14602456-I | 167.3   | 208    | 169.4  | TMPRSS3 | <a href="#">NM_032405.1</a> | DFNB8;DFNB10;ECHOS1;TADG12          | trypsin     | integral to  | proteolysis |
| GI_14602458-S | 95.9    | 99.9   | 90.4   | TMPRSS2 | <a href="#">NM_005656.2</a> | PRSS10                              | serine-     | integral to  | proteolysis |
| GI_14670357-A | 234.7   | 281.7  | 236.1  | GTF2I   | <a href="#">NM_033003.1</a> | DIWS;SPIN;IB291;BAP135;BTKAP1;TFII- | protein     | nucleus      | transcripti |
| GI_14670359-I | 184.7   | 216.6  | 195.1  | ZNF278  | <a href="#">NM_014323.2</a> | ZSG;MAZR;PATZ;RIAZ;dJ400N23         | protein     | membran      | transport   |
| GI_14670363-A | 143.5   | 151.5  | 132.5  | ZNF278  | <a href="#">NM_032051.1</a> | ZSG;MAZR;PATZ;RIAZ;dJ400N23         | protein     | membran      | transport   |
| GI_14670363-I | 317     | 281.9  | 266.5  | ZNF278  | <a href="#">NM_032051.1</a> | ZSG;MAZR;PATZ;RIAZ;dJ400N23         | protein     | membran      | transport   |
| GI_14670367-I | 105.1   | 95.9   | 98.2   | PCBP4   | <a href="#">NM_020418.2</a> | LIP4;MCG10                          | nucleic     | nucleus      | DNA         |
| GI_14670368-I | 162.3   | 194.5  | 163.9  | PCBP4   | <a href="#">NM_033008.1</a> | LIP4;MCG10                          | nucleic     | nucleus      | DNA         |
| GI_14670372-A | 753.1   | 915.6  | 871.9  | PCBP4   | <a href="#">NM_033010.1</a> | LIP4;MCG10                          | nucleic     | nucleus      | DNA         |
| GI_14670374-S | 2476    | 2329.4 | 3669.4 | STMN3   | <a href="#">NM_015894.2</a> | SCLIP                               |             | kinesin      | neurogene   |
| GI_14670378-I | 250.1   | 313    | 259.3  | TBL2    | <a href="#">NM_032988.1</a> | WBSCR13;WS-betaTRP;DKFZP43N024      | molecular   | cellular_co  | biological_ |
| GI_14670380-S | 804.7   | 786.2  | 823.1  | CENPF   | <a href="#">NM_016343.2</a> | CENF;PRO1779                        |             | kinetochor   | regulation  |
| GI_14670382-S | 134.1   | 149    | 152.5  | DAPK2   | <a href="#">NM_014326.2</a> | DRP-1                               | calmoduli   | cytoplasm    | induction   |
| GI_14670384-S | 1604.9  | 1373.2 | 1462.9 | AATF    | <a href="#">NM_012138.2</a> | DED;CHE1;CHE-1                      | apoptosis   | nucleus      | anti-       |
| GI_14670385-S | 32456.2 | 28199  | 29647  | RPS21   | <a href="#">NM_001024.2</a> |                                     | structural  | cytosolic    | protein     |
| GI_14670386-I | 250     | 320.9  | 283.3  | BAD     | <a href="#">NM_004322.2</a> | BBC2;BCL2L8                         | protein     | mitochond    | apoptotic   |
| GI_14670387-A | 647.6   | 711.8  | 825.9  | BAD     | <a href="#">NM_032989.1</a> | BBC2;BCL2L8                         | protein     | mitochond    | apoptotic   |
| GI_14670387-I | 171.7   | 181    | 176.4  | BAD     | <a href="#">NM_032989.1</a> | BBC2;BCL2L8                         | protein     | mitochond    | apoptotic   |
| GI_14670389-I | 94.8    | 126.9  | 107.1  | BAZ1B   | <a href="#">NM_023005.2</a> | WSTF;WBSCR9;WBSCR10                 | zinc ion    | kinesin      | transcripti |
| GI_14670391-A | 693.7   | 690.3  | 668    | BAZ1B   | <a href="#">NM_032408.1</a> | WSTF;WBSCR9;WBSCR10                 | zinc ion    | kinesin      | transcripti |
| GI_14670393-I | 736.7   | 789.9  | 735.7  | DEDD    | <a href="#">NM_032998.1</a> | DEFT;KE05;DEDD1;FLDED1;CASP8IP1     | DNA         | nucleolus    | induction   |
| GI_14670395-A | 1113.5  | 1120.7 | 1146   | DEDD    | <a href="#">NM_004216.2</a> | DEFT;KE05;DEDD1;FLDED1;CASP8IP1     | DNA         | nucleolus    | induction   |
| GI_14702160-I | 107.5   | 111.5  | 106.9  | CYLN2   | <a href="#">NM_003388.3</a> | CLIP;CLIP2;WSCR4;WBSCR4;CLIP-       |             | microtubul   |             |
| GI_14702161-A | 6204    | 4437   | 3667.1 | CYLN2   | <a href="#">NM_032421.1</a> | CLIP;CLIP2;WSCR4;WBSCR4;CLIP-       |             | microtubul   |             |
| GI_14702166-A | 975.4   | 4101.7 | 8796.4 | PLAT    | <a href="#">NM_000931.2</a> | TPA;T-PA                            | t-          |              | proteolysis |
| GI_14702170-I | 1583.5  | 1642.4 | 1216.9 | POLR2C  | <a href="#">NM_032940.1</a> | RPB3;RPB31;hRPB33;hsRPB3            | DNA-        | DNA-         | transcripti |
| GI_14702172-A | 3398.1  | 3366.7 | 2473.1 | POLR2C  | <a href="#">NM_002694.2</a> | RPB3;RPB31;hRPB33;hsRPB3            | DNA-        | DNA-         | transcripti |
| GI_14702179-A | 1487    | 1695.6 | 1455.1 | WBSCR1  | <a href="#">NM_031992.1</a> | EIF4H;WSCR1;KIAA0038                | translation | eukaryotic   | regulation  |
| GI_14702185-A | 293.1   | 282.9  | 276.8  | WBSCR5  | <a href="#">NM_032464.1</a> | LAB;NTAL;WSCR5;HSPC046;WBSCR15      | DNA         | nucleus      | regulation  |
| GI_14702187-I | 108     | 116.6  | 105.7  | WBSCR5  | <a href="#">NM_022040.2</a> | LAB;NTAL;WSCR5;HSPC046;WBSCR15      | DNA         | nucleus      | regulation  |
| GI_14717399-A | 129.6   | 135.1  | 145.1  | PCDHAC2 | <a href="#">NM_031883.2</a> | PCDH-ALPHA-C2                       | cell        | integral to  | cell        |
| GI_14717399-I | 126.3   | 156.4  | 128.9  | PCDHAC2 | <a href="#">NM_031883.2</a> | PCDH-ALPHA-C2                       | cell        | integral to  | cell        |
| GI_14717402-A | 101     | 105.6  | 97.1   | PCDHAC1 | <a href="#">NM_031882.2</a> | PCDH-ALPHA-C1                       | cell        | integral to  | cell        |
| GI_14717402-I | 89.9    | 107.4  | 104.2  | PCDHAC1 | <a href="#">NM_031882.2</a> | PCDH-ALPHA-C1                       | cell        | integral to  | cell        |
| GI_14717405-I | 105.2   | 107.2  | 99.5   | PCDHA9  | <a href="#">NM_014005.3</a> | KIAA0345;PCDH-ALPHA9                | calcium     | integral to  | homophili   |
| GI_14717406-S | 359.4   | 337.1  | 401.2  | TAF7    | <a href="#">NM_005642.2</a> | TAF2F;TAFII55                       | protein     | transcripti  | regulation  |
| GI_14719417-I | 266.2   | 308.5  | 261.1  | TRIM5   | <a href="#">NM_033034.1</a> | RNF88                               | zinc ion    | intracellula |             |
| GI_14719419-I | 97.4    | 101.9  | 92.4   | CCNB3   | <a href="#">NM_033031.1</a> |                                     |             |              |             |
| GI_14719421-S | 205.1   | 255.4  | 233.4  | LMLN    | <a href="#">NM_033029.1</a> | Msp;Gp63                            |             |              |             |
| GI_14719425-S | 226.3   | 275.8  | 259.4  | GAL3ST2 | <a href="#">NM_033036.1</a> | GAL3ST3                             | transferas  |              |             |
| GI_14719429-S | 3070.5  | 3035.8 | 3312.8 | PNMA1   | <a href="#">NM_006029.3</a> | MA1                                 | tumor       | nucleolus    | central     |
| GI_14719432-I | 100.8   | 86.2   | 84.6   | LRRC2   | <a href="#">NM_024512.2</a> |                                     |             |              |             |

|               |         |        |        |          |                             |                                        |             |              |              |
|---------------|---------|--------|--------|----------|-----------------------------|----------------------------------------|-------------|--------------|--------------|
| GI_14719826-S | 104.8   | 126    | 101    | COL1A1   | <a href="#">NM_000088.2</a> | OI4                                    | structural  | collagen     | epidermal    |
| GI_14734386-S | 738.1   | 887.3  | 820    | LOC90024 | <a href="#">XM_028217.1</a> |                                        |             |              |              |
| GI_14758391-S | 692.2   | 617.7  | 896.7  | FLJ12221 | <a href="#">XM_031342.1</a> |                                        |             |              |              |
| GI_14769619-S | 122.7   | 126.9  | 110.2  | KIAA1701 | <a href="#">XM_042087.1</a> |                                        |             |              |              |
| GI_14780893-S | 83.6    | 90.6   | 74.6   | GPR91    | <a href="#">NM_033050.1</a> |                                        |             |              |              |
| GI_14780899-S | 150.7   | 171.5  | 162.1  | OR2B2    | <a href="#">NM_033057.1</a> | OR2B9;OR6-1;hs6M1-10;dJ193B12.4        | olfactory   | integral to  | olfaction    |
| GI_14780901-S | 479.8   | 381    | 286.1  | MPP4     | <a href="#">NM_033066.1</a> | DLG6                                   | protein     |              | intracellula |
| GI_14780903-S | 89.2    | 94.5   | 90     | KLHL1    | <a href="#">NM_020866.1</a> | KIAA1490                               |             |              |              |
| GI_14790114-A | 994.7   | 780.9  | 290.5  | CASP3    | <a href="#">NM_032991.1</a> | CPP32;SCA-1;CPP32B;APOPAIN             | caspase-3   |              | induction    |
| GI_14790118-I | 123.6   | 118    | 123.8  | CASP3    | <a href="#">NM_004346.2</a> | CPP32;SCA-1;CPP32B;APOPAIN             | caspase-3   |              | induction    |
| GI_14790123-I | 147.4   | 145.4  | 154.7  | CASP9    | <a href="#">NM_001229.2</a> | MCH6;APAF3;APAF-3;ICE-LAP6             | caspase-9   | intracellula | caspase      |
| GI_14790127-A | 471.2   | 527.2  | 767.4  | CASP9    | <a href="#">NM_032996.1</a> | MCH6;APAF3;APAF-3;ICE-LAP6             | caspase-9   | intracellula | caspase      |
| GI_14790134-S | 335.5   | 392.7  | 386.2  | MTERF    | <a href="#">NM_006980.2</a> |                                        | transcripti | mitochond    | RNA          |
| GI_14790137-S | 559.9   | 550.6  | 541.5  | POLRMT   | <a href="#">NM_005035.2</a> | APOLMT;MTRPOL                          | DNA-        | mitochond    | DNA          |
| GI_14790142-S | 31986.4 | 31938  | 24986  | RPS23    | <a href="#">NM_001025.2</a> |                                        | structural  | cytosolic    | protein      |
| GI_14790145-S | 135.1   | 144.2  | 121.8  | CXCL11   | <a href="#">NM_005409.3</a> | IP9;H174;IP-9;b-R1;I-TAC;SCYB11;SCYB9B | chemokine   | extracellul  | response     |
| GI_14790148-I | 115.5   | 141.2  | 119.8  | TNFSF11  | <a href="#">NM_003701.2</a> | ODF;OPGL;sOdf;RANKL;TRANCE;hRANKL2     | cytokine    | extracellul  | positive     |
| GI_14790166-A | 310     | 400    | 414.6  | TNFRSF6B | <a href="#">NM_003823.2</a> | M68;TR6;DCR3;DJ583P15.1.1              | apoptosis   | soluble      | anti-        |
| GI_14790166-I | 129.9   | 126.3  | 103.6  | TNFRSF6B | <a href="#">NM_003823.2</a> | M68;TR6;DCR3;DJ583P15.1.1              | apoptosis   | soluble      | anti-        |
| GI_14790189-S | 1087.1  | 907.1  | 854.8  | SHARP    | <a href="#">NM_015001.2</a> | MINT;KIAA0929                          | nucleic     | nucleus      | regulation   |
| GI_14861835-A | 1416.8  | 1479.8 | 1114   | ALG2     | <a href="#">NM_033087.1</a> | CDGII;hALPG2;FLJ14511                  |             |              |              |
| GI_14861857-S | 136.2   | 136.1  | 127.2  | C6orf114 | <a href="#">NM_033069.1</a> | ADG-90                                 |             |              |              |
| GI_14916436-S | 260.1   | 275.9  | 221.6  | Prostein | <a href="#">NM_033102.1</a> | PRST                                   |             |              |              |
| GI_14916444-S | 90.2    | 95.6   | 81.3   | GALP     | <a href="#">NM_033106.1</a> |                                        | neuropepti  | cellular_co  | neuropepti   |
| GI_14916454-S | 84      | 96.4   | 82.9   | PSKH2    | <a href="#">NM_033126.1</a> |                                        | ATP         |              | protein      |
| GI_14916472-S | 1995.9  | 2445.2 | 2035.3 | SCIN     | <a href="#">NM_033128.1</a> | KIAA1905                               |             |              |              |
| GI_14916476-S | 143.8   | 134.1  | 131.1  | RGPR     | <a href="#">NM_033127.1</a> | KIAA1928                               |             |              |              |
| GI_14916482-I | 168.3   | 209.2  | 212.2  | CASP6    | <a href="#">NM_001226.2</a> | MCH2                                   | cysteine-   |              | induction    |
| GI_14916484-A | 154.3   | 175.3  | 179.2  | CASP6    | <a href="#">NM_032992.1</a> | MCH2                                   | cysteine-   |              | induction    |
| GI_14916487-A | 137.1   | 148    | 130.7  | CASP10   | <a href="#">NM_032974.1</a> | MCH4;ALPS2;FLICE2                      | caspase-    |              | induction    |
| GI_14916487-I | 1327.2  | 1455.2 | 1409.7 | CASP10   | <a href="#">NM_032974.1</a> | MCH4;ALPS2;FLICE2                      | caspase-    |              | induction    |
| GI_14916493-I | 80.3    | 88.3   | 85.6   | RARB     | <a href="#">NM_000965.2</a> | HAP;RRB2;NR1B2                         | retinoic    | nucleus      | oncogene     |
| GI_14916495-A | 130.3   | 187.8  | 202.2  | RARB     | <a href="#">NM_016152.2</a> | HAP;RRB2;NR1B2                         | retinoic    | nucleus      | oncogene     |
| GI_14916496-A | 104.6   | 128.6  | 101.2  | OGN      | <a href="#">NM_014057.2</a> | OIF;SLRR3A;DKFZP586P2421               | growth      | cellular_co  | biological_  |
| GI_14916497-I | 89.9    | 87     | 84.9   | OGN      | <a href="#">NM_033014.1</a> | OIF;SLRR3A;DKFZP586P2421               | growth      | cellular_co  | biological_  |
| GI_14916502-A | 19370.8 | 19972  | 15449  | RPS24    | <a href="#">NM_001026.2</a> |                                        | structural  | cytosolic    | protein      |
| GI_14916516-S | 188.6   | 199.6  | 133.9  | AP1M2    | <a href="#">NM_005498.3</a> | MU1B;MU-1B;HSMU1B                      | protein     | coated pit   | nonselecti   |
| GI_14916517-S | 1624    | 1214.1 | 1272.9 | AP3M1    | <a href="#">NM_012095.2</a> |                                        | protein     | lysosome     | protein-     |
| GI_14916518-S | 786.5   | 625.9  | 458.5  | AP3M2    | <a href="#">NM_006803.2</a> | P47B;AP47B;CLA20                       | protein     | clathrin     | intracellula |
| GI_14917108-S | 2695.8  | 3753.1 | 3130.1 | AP2M1    | <a href="#">NM_004068.2</a> | AP50;CLAPM1                            | vesicle     | coated       | nonselecti   |
| GI_14917110-S | 424.8   | 507.5  | 376.3  | AP4M1    | <a href="#">NM_004722.2</a> | MU-4;MU-ARP2                           | vesicle     | clathrin     | vesicle-     |
| GI_14917112-S | 2134.7  | 2426.5 | 2239   | SRPRB    | <a href="#">NM_021203.2</a> | APMCF1                                 | GTP         | signal       |              |
| GI_14917114-S | 266.1   | 333.8  | 294.7  | KRTHA1   | <a href="#">NM_002277.2</a> | HA1;hHa1                               | structural  | intermedia   | epidermal    |
| GI_14917116-S | 125.3   | 136.6  | 133    | KRTHA3A  | <a href="#">NM_004138.2</a> | HA3I;Krt1-3;hHa3-I                     |             | kinesin      | cell shape   |

|               |         |        |        |            |                             |                                        |             |              |             |
|---------------|---------|--------|--------|------------|-----------------------------|----------------------------------------|-------------|--------------|-------------|
| GI_14917118-S | 124.8   | 127.9  | 138.4  | KRTHA4     | <a href="#">NM_021013.3</a> | HA4;hHa4                               | structural  | intermedia   | epidermal   |
| GI_14917120-S | 111.1   | 110.7  | 117.5  | KRTHA7     | <a href="#">NM_003770.3</a> | HA7;hHa7                               | structural  | cytoskelet   |             |
| GI_14971410-A | 1587.5  | 1455   | 1501.1 | TRIM33     | <a href="#">NM_033020.1</a> | PTC7;RFG7;TF1G;TIF1G;FLJ11429;KIAA11   | transcripti | kinesin      | regulation  |
| GI_14971412-I | 95.3    | 85.2   | 74.8   | TRIM33     | <a href="#">NM_015906.2</a> | PTC7;RFG7;TF1G;TIF1G;FLJ11429;KIAA11   | transcripti | kinesin      | regulation  |
| GI_14971414-S | 380.7   | 617.6  | 708.1  | TIF1       | <a href="#">NM_003852.2</a> | PTC6;TF1A;RNF82;TIF1A;hTIF1;TRIM24;TIF | specific    | kinesin      | transcripti |
| GI_14971416-S | 1100.1  | 1148.3 | 1250   | TRIM28     | <a href="#">NM_005762.2</a> | KAP1;TF1B;RNF96;TIF1B                  | transcripti | nucleus      | regulation  |
| GI_15011879-S | 635     | 676.5  | 562.3  | MST4       | <a href="#">NM_016542.2</a> | MASK                                   |             |              |             |
| GI_15011885-S | 198.6   | 209.7  | 192.7  | MGC5356    | <a href="#">NM_024059.2</a> |                                        |             |              |             |
| GI_15011886-S | 537     | 818.3  | 670.3  | MGC5338    | <a href="#">NM_024062.2</a> |                                        |             |              |             |
| GI_15011899-A | 623.3   | 541.7  | 453.7  | SYTL2      | <a href="#">NM_032379.2</a> | SLP2;CHR11SYT;FLJ20163;FLJ21219        |             |              |             |
| GI_15011899-I | 98.8    | 93     | 101.1  | SYTL2      | <a href="#">NM_032379.2</a> | SLP2;CHR11SYT;FLJ20163;FLJ21219        |             |              |             |
| GI_15011901-I | 117.4   | 115.8  | 110.3  | SYTL2      | <a href="#">NM_032943.1</a> | SLP2;CHR11SYT;FLJ20163;FLJ21219        |             |              |             |
| GI_15011911-S | 125.9   | 140.9  | 122.5  | CDH6       | <a href="#">NM_004932.2</a> | KCAD                                   | calcium-    | integral to  | cell        |
| GI_15011912-S | 917.9   | 2155.1 | 1078.9 | COL6A1     | <a href="#">NM_001848.1</a> | OPLL                                   | collagen    | microfibril  | histogene   |
| GI_15011914-I | 282.2   | 265.4  | 232.2  | NOLA1      | <a href="#">NM_018983.2</a> | GAR1                                   | cation      | membran      |             |
| GI_15011915-A | 1203.7  | 932.7  | 788.1  | NOLA1      | <a href="#">NM_032993.1</a> | GAR1                                   | cation      | membran      |             |
| GI_15011917-S | 4570    | 5805.8 | 5648.7 | ATP6AP2    | <a href="#">NM_005765.2</a> | M8-9;ATP6IP2;APT6M8-9;ATP6M8-9         | hydrogen    | integral to  | proton      |
| GI_15011919-S | 6788.7  | 6549.4 | 7465   | NOLA2      | <a href="#">NM_017838.2</a> | NHP2;NHP2P;FLJ20479                    |             |              |             |
| GI_15011920-S | 5043.6  | 4936.1 | 5404.2 | NOLA3      | <a href="#">NM_018648.2</a> | NOP10;NOP10P                           | molecular   | small        | pseudouri   |
| GI_15011921-S | 2074.3  | 1706   | 1537   | DKC1       | <a href="#">NM_001363.2</a> | DKC;NAP57;NOLA4;XAP101;dyskerin        | RNA         | nucleoplas   | rRNA        |
| GI_15011922-S | 113     | 110    | 101.1  | FGF19      | <a href="#">NM_005117.2</a> |                                        | growth      |              | neurogene   |
| GI_15011923-A | 577.1   | 488.1  | 515.2  | GTF2IRD1   | <a href="#">NM_005685.2</a> | GTF3;RBAP2;CREAM1;MUSTRD1;WBSCR1       | transcripti | nucleus      | regulation  |
| GI_15011925-I | 200     | 206.9  | 214.5  | PCTK1      | <a href="#">NM_033018.1</a> | PCTAIRE1;PCTGAIRE                      | protein     |              | protein     |
| GI_15011927-A | 847.3   | 1103   | 966.8  | PCTK1      | <a href="#">NM_033019.1</a> | PCTAIRE1;PCTGAIRE                      | protein     |              | protein     |
| GI_15011935-S | 7448.4  | 7417.4 | 6122.8 | RPS26      | <a href="#">NM_001029.2</a> |                                        | structural  | cytosolic    | protein     |
| GI_15011937-S | 31234.6 | 26094  | 23936  | RPS27      | <a href="#">NM_001030.2</a> | MPS1;MPS-1                             | structural  | ribosome     | protein     |
| GI_15011938-S | 11484.8 | 9659.1 | 7964.5 | RPS28      | <a href="#">NM_001031.2</a> |                                        | structural  | cytosolic    | protein     |
| GI_15011940-A | 1959    | 1651.7 | 1253.7 | TRIM4      | <a href="#">NM_033091.1</a> | RNF87                                  |             |              |             |
| GI_15011942-S | 465.5   | 383.9  | 380.3  | TRIM2      | <a href="#">NM_015271.2</a> | RNF86;KIAA0517                         | zinc ion    | cytoplasm    | biological_ |
| GI_15011943-A | 130.7   | 161.5  | 143.7  | TRIM5      | <a href="#">NM_033092.1</a> | RNF88                                  | zinc ion    | intracellula |             |
| GI_15011943-I | 155.8   | 172    | 171.1  | TRIM5      | <a href="#">NM_033092.1</a> | RNF88                                  | zinc ion    | intracellula |             |
| GI_15011973-S | 2729.9  | 1671.5 | 1518.5 | ARHGEF2    | <a href="#">NM_004723.2</a> | GEF;P40;GEFH1;LFP40;GEF-               | guanyl-     | microtubul   | cell        |
| GI_15011975-S | 176.2   | 212.5  | 127.8  | ARHGEF5    | <a href="#">NM_005435.2</a> | P60;TIM;GEF5;TIM1                      | GTP         |              | oncogene    |
| GI_15011976-S | 98.6    | 113.3  | 104.5  | ARHGEF16   | <a href="#">NM_014448.2</a> | NBR;GEF16                              |             |              |             |
| GI_15011978-A | 127.3   | 578.2  | 1142.5 | ARHGEF4    | <a href="#">NM_015320.2</a> | ASEF;GEF4;STM6;KIAA1112;DKFZp434G20    |             |              |             |
| GI_15011980-I | 120.1   | 134    | 116.5  | ARHGEF4    | <a href="#">NM_032995.1</a> | ASEF;GEF4;STM6;KIAA1112;DKFZp434G20    |             |              |             |
| GI_15022798-S | 371.9   | 361.5  | 337.3  | STARD10    | <a href="#">NM_006645.1</a> | PCTP2;CGI-52;NY-CO-28;SDCCAG28         | tumor       |              |             |
| GI_15022800-A | 563.9   | 797.4  | 977.6  | HYAL2      | <a href="#">NM_003773.2</a> | LUCA2;LuCa-2                           | hyalurono   | lysosome     | glycosami   |
| GI_15022800-I | 94.7    | 92.6   | 72.4   | HYAL2      | <a href="#">NM_003773.2</a> | LUCA2;LuCa-2                           | hyalurono   | lysosome     | glycosami   |
| GI_15022816-S | 99.3    | 106.9  | 109.3  | KRTHA3B    | <a href="#">NM_002279.3</a> | HA3II;KRTHA3A;hHa3-II                  |             | kinesin      | cell shape  |
| GI_15029523-S | 127.7   | 149.2  | 133    | DKFZP434F1 | <a href="#">NM_015643.1</a> |                                        |             |              |             |
| GI_15029525-S | 200.7   | 227.9  | 233.8  | DNAH8      | <a href="#">NM_001371.1</a> | hdhc9                                  | axonemal    | axonemal     | cell        |
| GI_15042936-S | 214.4   | 275.6  | 251.3  | PADI2      | <a href="#">NM_007365.1</a> | PDI2;KIAA0994                          | protein-    |              | protein     |
| GI_15042948-S | 169.6   | 163.4  | 180    | PRDM12     | <a href="#">NM_021619.2</a> | PFM9                                   | DNA         | nucleus      | regulation  |

|               |         |        |        |          |                             |                                   |             |              |             |
|---------------|---------|--------|--------|----------|-----------------------------|-----------------------------------|-------------|--------------|-------------|
| GI_15042952-S | 108.6   | 114.7  | 107.7  | MUC13    | <a href="#">NM_033049.1</a> | DRCC1;FLJ20063                    |             |              |             |
| GI_15042958-A | 224.7   | 282.5  | 263    | SLC4A5   | <a href="#">NM_021196.2</a> | NBC4                              |             |              |             |
| GI_15042962-S | 203.8   | 219.7  | 209    | DUX4     | <a href="#">NM_033178.1</a> |                                   | transcripti | nucleus      | regulation  |
| GI_15042964-S | 314.1   | 407.2  | 298.7  | OR51B4   | <a href="#">NM_033179.1</a> | HOR5'Beta1                        | olfactory   | integral to  | olfaction   |
| GI_15042966-S | 112.3   | 121.3  | 101.1  | OR51B2   | <a href="#">NM_033180.1</a> | OR51B1P;HOR5'Beta3                | olfactory   | integral to  | G-protein   |
| GI_15055534-S | 100.6   | 107.9  | 103.7  | BPIL1    | <a href="#">NM_025227.1</a> | RYSR;LPLUNC2;dJ726C3.2            | lipid       |              |             |
| GI_15055536-S | 156.1   | 186.9  | 155.4  | SCGN     | <a href="#">NM_006998.2</a> | SEGN;SECRET;DJ501N12.8            | calcium     | cytoplasm    | biological_ |
| GI_15055538-S | 59473.8 | 55188  | 39023  | RPS2     | <a href="#">NM_002952.2</a> | LLREP3                            | structural  | cytosolic    | protein     |
| GI_15055542-S | 807.4   | 844.9  | 827.4  | SRP46    | <a href="#">NM_032102.1</a> |                                   | nucleic     | nucleus      | regulation  |
| GI_15055544-A | 221.7   | 228.3  | 198.3  | FGF1     | <a href="#">NM_033137.1</a> | AFGF;ECGF;FGFA;ECGFA;ECGFB;HBGF1; | fibroblast  | extracellul  | embryoge    |
| GI_15055546-I | 120.2   | 117.5  | 110.6  | FGF1     | <a href="#">NM_000800.2</a> | AFGF;ECGF;FGFA;ECGFA;ECGFB;HBGF1; | fibroblast  | extracellul  | embryoge    |
| GI_15055547-S | 135.8   | 161    | 151.5  | FGF23    | <a href="#">NM_020638.2</a> | ADHR;HYPF;HPDR2                   | growth      | extracellul  | cell        |
| GI_15055548-A | 179.7   | 186.3  | 176.6  | FGF5     | <a href="#">NM_033143.1</a> | FGF5S                             | fibroblast  | extracellul  | FGF         |
| GI_15055550-I | 98.1    | 130.3  | 110.6  | FGF5     | <a href="#">NM_004464.2</a> | FGF5S                             | fibroblast  | extracellul  | FGF         |
| GI_15082233-S | 113.9   | 116.5  | 112.8  | LDHL     | <a href="#">NM_033195.1</a> |                                   | L-lactate   |              | glycolysis  |
| GI_15082237-S | 214.7   | 262.5  | 247.2  | HspB9    | <a href="#">NM_033194.1</a> |                                   | heat        |              |             |
| GI_15082251-S | 118.7   | 113.6  | 94.1   | MGC12466 | <a href="#">NM_033213.1</a> |                                   | nucleic     | nucleus      | regulation  |
| GI_15082255-I | 123.5   | 140.1  | 137.2  | LCMT1    | <a href="#">NM_016015.2</a> | LCMT;CGI-68                       | S-          |              | protein     |
| GI_15082260-S | 113.7   | 111.5  | 88.3   | WNT9A    | <a href="#">NM_003395.1</a> | WNT14                             | extracellul | extracellul  | signal      |
| GI_15100150-S | 383.9   | 482.3  | 386.3  | BAT5     | <a href="#">NM_021160.1</a> | NG26;D6S82E                       | catalytic   | integral to  |             |
| GI_15100157-S | 119.4   | 105.4  | 110.9  | NYD-SP12 | <a href="#">NM_031955.2</a> |                                   |             |              |             |
| GI_15100159-S | 101.9   | 87.9   | 95.1   | LOC84643 | <a href="#">NM_032559.2</a> |                                   | ATP         | kinesin      | microtubul  |
| GI_15100161-S | 101.2   | 118.8  | 112.9  | NYD-SP21 | <a href="#">NM_032597.2</a> | DKFZp434H092                      |             |              |             |
| GI_15100169-I | 118.5   | 125.4  | 122.2  | TRIM15   | <a href="#">NM_033229.1</a> | RNF93;ZNFB7                       | zinc ion    | kinesin      |             |
| GI_15147227-S | 1728.5  | 3033   | 5486.9 | BEX1     | <a href="#">NM_018476.2</a> | HBEX2;HGR74-h                     | signal      | nucleus      | regulation  |
| GI_15147233-S | 124.8   | 141.5  | 127.6  | CAM-KIIN | <a href="#">NM_033259.1</a> |                                   |             |              |             |
| GI_15147245-S | 79.6    | 87.7   | 94.9   | GNG8     | <a href="#">NM_033258.1</a> |                                   | signal      | heterotrim   | G-protein   |
| GI_15147247-S | 135.7   | 114.4  | 107    | EPST11   | <a href="#">NM_033255.1</a> | BRESI1                            |             |              |             |
| GI_15147249-S | 444.2   | 384.5  | 420.8  | PPP1R14A | <a href="#">NM_033256.1</a> | CPI-17;PPP1INL                    |             |              |             |
| GI_15147251-S | 2005    | 2180.3 | 1342.5 | SH3BP1   | <a href="#">NM_018957.2</a> | dJ37E16;FLJ21318                  |             |              |             |
| GI_15147327-A | 104     | 122.7  | 102.4  | CYP2A7   | <a href="#">NM_030589.2</a> | CPA7;CPAD;CYP11A7;P450-IIA4       | cytochrom   | membran      | electron    |
| GI_15147331-S | 104.3   | 106.1  | 106.5  | CYP3A5   | <a href="#">NM_000777.2</a> | CP35;PCN3;P450PCN3                | monooxyg    | microsom     | steroid     |
| GI_15147332-S | 936.1   | 868.5  | 877.5  | TRIM37   | <a href="#">NM_015294.1</a> | MUL;TEF3;KIAA0898                 | zinc ion    | intracellula |             |
| GI_15147334-S | 257.3   | 247.3  | 248.8  | NCOA5    | <a href="#">NM_020967.1</a> | CIA;KIAA1637;bA465L10.6           |             | nucleus      | regulation  |
| GI_15147344-S | 81.1    | 81.6   | 74.1   | FGF7     | <a href="#">NM_002009.2</a> | KGF;HBGF-7                        | growth      | extracellul  | epidermal   |
| GI_15147349-A | 104.1   | 109.9  | 92.7   | FGF8     | <a href="#">NM_033165.1</a> | AIGF;HBGF-8                       | fibroblast  | cellular_co  | gastrulatio |
| GI_15149469-S | 1336.9  | 1216.7 | 1218.2 | JJAZ1    | <a href="#">NM_015355.1</a> | CHET9;SUZ12;KIAA0160              |             | nucleus      | cell growth |
| GI_15149471-S | 94.3    | 86.9   | 89.3   | PBX4     | <a href="#">NM_025245.1</a> |                                   | transcripti | nucleus      | regulation  |
| GI_15149473-I | 113.7   | 109    | 121.4  | ABCC11   | <a href="#">NM_033151.2</a> | MRP8                              |             |              |             |
| GI_15149477-I | 144.2   | 145.8  | 129.3  | COL2A1   | <a href="#">NM_001844.3</a> | SEDC;COL11A3                      | collagen    | collagen     | skeletal    |
| GI_15149478-A | 137.6   | 164    | 143.3  | COL2A1   | <a href="#">NM_033150.1</a> | SEDC;COL11A3                      | collagen    | collagen     | skeletal    |
| GI_15149480-S | 101.1   | 110.8  | 95.6   | COL3A1   | <a href="#">NM_000090.2</a> |                                   | collagen    | collagen     | circulation |
| GI_15150800-S | 123.5   | 123.3  | 121.8  | LOC91120 | <a href="#">NM_033196.1</a> |                                   |             |              |             |
| GI_15150802-S | 148.4   | 184.7  | 162.1  | OPN4     | <a href="#">NM_033282.1</a> | MOP                               | G-protein   | integral to  | phototrans  |



|               |         |        |        |          |                             |                                 |             |                       |
|---------------|---------|--------|--------|----------|-----------------------------|---------------------------------|-------------|-----------------------|
| GI_15150808-S | 432.9   | 450.1  | 674.5  | LOC90701 | <a href="#">NM_033280.1</a> | peptidase                       | microsom    | proteolysis           |
| GI_15187163-S | 83.6    | 87.1   | 90.1   | LACRT    | <a href="#">NM_033277.1</a> |                                 |             |                       |
| GI_15193291-A | 172.3   | 207.5  | 208.3  | NALP12   | <a href="#">NM_033297.1</a> | RNO2;PYPAF7                     |             |                       |
| GI_15193291-I | 87.4    | 109    | 97.5   | NALP12   | <a href="#">NM_033297.1</a> | RNO2;PYPAF7                     |             |                       |
| GI_15193293-S | 4835.1  | 6287.7 | 5593.1 | PGR1     | <a href="#">NM_033296.1</a> |                                 |             |                       |
| GI_15193297-S | 104.5   | 102.3  | 103.7  | GABRG3   | <a href="#">NM_033223.1</a> |                                 | extracellul | integral to chloride  |
| GI_15208630-S | 183.3   | 454.7  | 481.4  | MGC4655  | <a href="#">NM_033309.1</a> |                                 | galactosylt | membran protein       |
| GI_15208644-S | 437.2   | 467.2  | 415.6  | BYSL     | <a href="#">NM_004053.2</a> | BYSTIN                          | cell        | cytoplasm pregnancy   |
| GI_15208647-A | 140     | 135.2  | 144.6  | CNR1     | <a href="#">NM_033181.1</a> | CB1;CNR;CB-R;CB1A;CANN6;CB1K5   | cannabino   | integral to G-protein |
| GI_15208649-S | 496.3   | 573.9  | 590.1  | TRIM32   | <a href="#">NM_012210.2</a> | HT2A;TATIP;LGMD2H               | transcripti | nucleus virulence     |
| GI_15208650-S | 212.2   | 248.7  | 237.2  | HYAL3    | <a href="#">NM_003549.2</a> | LUCA3;LUCA-3;LUCA14;Minna14     | hyalurono   | carbohydr             |
| GI_15208652-S | 292.2   | 323.3  | 295.7  | ZNF147   | <a href="#">NM_005082.2</a> | EFP;Z147;RNF147;TRIM25          | transcripti | kinesin               |
| GI_15208653-S | 207.1   | 250.3  | 218    | DGCR6    | <a href="#">NM_005675.2</a> |                                 | cell        | extracellul histogene |
| GI_15208655-A | 761.2   | 811.5  | 898    | PDGFA    | <a href="#">NM_033023.1</a> | PDGF1                           | platelet-   | extracellul cell      |
| GI_15208659-S | 331.5   | 365.9  | 395.5  | SSA1     | <a href="#">NM_003141.2</a> | SSA;RO52;RNF81;TRIM21           | ribonucleo  | ribonucleo pathogene  |
| GI_15208661-S | 870.1   | 1218.5 | 725.2  | TRIM22   | <a href="#">NM_006074.2</a> | RNF94;STAF50;GPSTAF50           | transcripti | nucleus regulation    |
| GI_15208662-I | 129.4   | 156    | 143.5  | TRIM14   | <a href="#">NM_014788.2</a> | KIAA0129                        | protein     | cytoplasm cell growth |
| GI_15208664-A | 119.2   | 130.4  | 119.1  | TRIM14   | <a href="#">NM_033219.1</a> | KIAA0129                        | protein     | cytoplasm cell growth |
| GI_15208666-I | 115.8   | 123.8  | 125.1  | TRIM14   | <a href="#">NM_033220.1</a> | KIAA0129                        | protein     | cytoplasm cell growth |
| GI_15277412-S | 146.5   | 150.8  | 140.6  | SOX6     | <a href="#">NM_033326.1</a> | HSSOX6                          | transcripti | kinesin establish     |
| GI_15277420-A | 1151.7  | 988.5  | 903.8  | UBE2J1   | <a href="#">NM_016336.2</a> | Ubc6p;CGI-                      | ubiquitin   | ubiquitin             |
| GI_15281149-S | 113.3   | 111.5  | 111.7  | UNKL     | <a href="#">NM_024023.1</a> |                                 |             |                       |
| GI_15426251-S | 347.6   | 451.3  | 421.5  | CGB8     | <a href="#">NM_033183.1</a> |                                 |             |                       |
| GI_15431284-S | 137.7   | 131.3  | 111.2  | ZBTB10   | <a href="#">NM_023929.2</a> | RINZF;FLJ12752                  | protein     |                       |
| GI_15431286-S | 344.9   | 447.2  | 421.7  | LHB      | <a href="#">NM_000894.2</a> | CGB4;LSH-B                      | receptor    | soluble male          |
| GI_15431287-S | 26992.1 | 25290  | 20105  | RPL10A   | <a href="#">NM_007104.3</a> | NEDD6;Csa-19                    | structural  | cytosolic embryoge    |
| GI_15431289-S | 31924.7 | 30887  | 22175  | RPL11    | <a href="#">NM_000975.2</a> |                                 | structural  | cytosolic protein     |
| GI_15431291-S | 39601.4 | 32762  | 23163  | RPL12    | <a href="#">NM_000976.2</a> |                                 | structural  | cytosolic protein     |
| GI_15431292-S | 15017.9 | 14831  | 11868  | RPL15    | <a href="#">NM_002948.2</a> | EC45;RPL10;RPLY10;RPYL10        | structural  | ribosome protein      |
| GI_15431294-I | 599     | 753.2  | 796.3  | RPL13    | <a href="#">NM_033251.1</a> | BBC1;D16S444E                   | structural  | cytosolic protein     |
| GI_15431296-A | 10564   | 9637.9 | 7638.8 | RPL13    | <a href="#">NM_000977.2</a> | BBC1;D16S444E                   | structural  | cytosolic protein     |
| GI_15431298-S | 23117.4 | 19597  | 17895  | RPL18    | <a href="#">NM_000979.2</a> |                                 | structural  | cytosolic protein     |
| GI_15431299-S | 38947.5 | 33738  | 29026  | RPL18A   | <a href="#">NM_000980.2</a> |                                 | structural  | cytosolic protein     |
| GI_15431300-S | 4169.3  | 3914.6 | 3209.3 | RPL7     | <a href="#">NM_000971.2</a> |                                 | structural  | cytosolic protein     |
| GI_15431302-S | 1716    | 1518.8 | 1156.2 | RPL9     | <a href="#">NM_000661.2</a> |                                 | structural  | ribosome protein      |
| GI_15431304-A | 7096.4  | 6153.5 | 6420.8 | RPL8     | <a href="#">NM_000973.2</a> |                                 | structural  | cytosolic protein     |
| GI_15431305-I | 367     | 461.5  | 455.8  | RPL8     | <a href="#">NM_033301.1</a> |                                 | structural  | cytosolic protein     |
| GI_15431308-S | 32831.3 | 26563  | 25327  | RPS7     | <a href="#">NM_001011.2</a> |                                 | structural  | cytosolic protein     |
| GI_15431309-S | 409.2   | 517    | 431.4  | KRT14    | <a href="#">NM_000526.3</a> | K14;CK14;EBS3;EBS4              | structural  | intermedia epidermal  |
| GI_15431311-S | 87.2    | 92.7   | 94.9   | KRTHA2   | <a href="#">NM_002278.2</a> | HA2;hHa2                        |             | kinesin epidermal     |
| GI_15431313-S | 134.5   | 151.5  | 145.7  | KRTHA5   | <a href="#">NM_002280.3</a> | HA5;hHa5                        |             | kinesin embryoge      |
| GI_15431315-S | 332.3   | 346.3  | 297.1  | KRTHB4   | <a href="#">NM_033045.2</a> | HB4;Hb-4;hHb4                   | structural  | kinesin biological_   |
| GI_15431317-S | 478.9   | 562.5  | 497.8  | KRTHA8   | <a href="#">NM_006771.3</a> | HA8;hHa8                        | structural  | intermedia            |
| GI_15431319-S | 13786.1 | 11039  | 17263  | KRTHB1   | <a href="#">NM_002281.2</a> | HB1;Hb-1;MLN137;ghHkb1;hHAKB2-1 |             | kinesin cell shape    |

|               |        |        |       |         |                             |                                       |             |              |             |
|---------------|--------|--------|-------|---------|-----------------------------|---------------------------------------|-------------|--------------|-------------|
| GI_15431322-S | 276.3  | 351.8  | 297.5 | KRTHB3  | <a href="#">NM_002282.2</a> | HB3;Hb-3                              | serine      | kinesin      | epidermal   |
| GI_15431324-S | 129.6  | 154.7  | 148.8 | KRTHB5  | <a href="#">NM_002283.2</a> | HB5;Hb-5;hHb5                         | structural  | intermedia   | epidermal   |
| GI_15431325-S | 546.9  | 1110.1 | 359.9 | KRTHB6  | <a href="#">NM_002284.2</a> | HB6;MNX;hHb6                          |             | kinesin      |             |
| GI_15431327-I | 105.4  | 117.5  | 112.1 | CASP1   | <a href="#">NM_033292.1</a> | ICE;P45;IL1BC                         | thiol       | intracellula | pathogene   |
| GI_15431333-A | 86.1   | 85.6   | 79.1  | CASP1   | <a href="#">NM_033295.1</a> | ICE;P45;IL1BC                         | thiol       | intracellula | pathogene   |
| GI_15451747-S | 113.1  | 129.8  | 106   | CGB5    | <a href="#">NM_033043.1</a> | HCG                                   |             |              |             |
| GI_15451749-S | 108    | 109.2  | 112   | CGB7    | <a href="#">NM_033142.1</a> | CG-beta-a                             | hormone     | soluble      | female      |
| GI_15451751-S | 156.7  | 192    | 181.6 | CGB     | <a href="#">NM_000737.2</a> | CGB3                                  | hormone     | soluble      | female      |
| GI_15451756-I | 130.9  | 155.7  | 131   | ADRA1A  | <a href="#">NM_033302.1</a> | ADRA1C;ADRA1L1                        | alpha1-     | integral to  | protein     |
| GI_15451758-I | 143    | 182    | 155   | ADRA1A  | <a href="#">NM_033303.1</a> | ADRA1C;ADRA1L1                        | alpha1-     | integral to  | protein     |
| GI_15451760-A | 96.6   | 102    | 100.6 | ADRA1A  | <a href="#">NM_033304.1</a> | ADRA1C;ADRA1L1                        | alpha1-     | integral to  | protein     |
| GI_15451760-I | 83.8   | 83.9   | 86.4  | ADRA1A  | <a href="#">NM_033304.1</a> | ADRA1C;ADRA1L1                        | alpha1-     | integral to  | protein     |
| GI_15451762-I | 154.5  | 142.5  | 103.8 | PML     | <a href="#">NM_033238.1</a> | MYL;RNF71;TRIM19                      | transcripti | nucleus      | oncogene    |
| GI_15451776-A | 156.3  | 152.8  | 140.7 | PML     | <a href="#">NM_033247.1</a> | MYL;RNF71;TRIM19                      | transcripti | nucleus      | oncogene    |
| GI_15451783-S | 129.8  | 150    | 131.8 | ADRA1B  | <a href="#">NM_000679.2</a> | ADRA1                                 | alpha1-     | integral to  | protein     |
| GI_15451784-S | 329.1  | 410    | 345.2 | ADRA1D  | <a href="#">NM_000678.2</a> | ADRA1;ADRA1A;ADRA1R                   | alpha1-     | integral to  | cell growth |
| GI_15451785-A | 409.5  | 466.8  | 418.8 | PDGFB   | <a href="#">NM_033016.1</a> | SIS;SSV;PDGF2;c-sis                   | platelet-   | membran      | response    |
| GI_15451787-S | 88.7   | 87.2   | 79.6  | PDGFRA  | <a href="#">NM_006206.2</a> | CD140A;PDGFR2                         | platelet-   | integral to  | cell        |
| GI_15451788-S | 331.3  | 778.9  | 430.6 | PDGFRB  | <a href="#">NM_002609.2</a> | JTK12;PDGFR;CD140B;PDGFR1;PDGF-R-     | platelet-   | integral to  | signal      |
| GI_15451836-I | 103.3  | 114.5  | 116.2 | ABCA7   | <a href="#">NM_019112.2</a> | ABCX;ABCA-SSN                         | ATP         | integral to  |             |
| GI_15451837-A | 108.5  | 133.7  | 133.4 | ABCA7   | <a href="#">NM_033308.1</a> | ABCX;ABCA-SSN                         | ATP         | integral to  |             |
| GI_15451837-I | 121.2  | 125.8  | 118.3 | ABCA7   | <a href="#">NM_033308.1</a> | ABCX;ABCA-SSN                         | ATP         | integral to  |             |
| GI_15451841-A | 122.6  | 127.9  | 128.3 | ADAM19  | <a href="#">NM_023038.2</a> | MLTNB;FKSG34;MADDAM                   | zinc ion    | integral to  | proteolysis |
| GI_15451841-I | 122.3  | 106.8  | 108.6 | ADAM19  | <a href="#">NM_023038.2</a> | MLTNB;FKSG34;MADDAM                   | zinc ion    | integral to  | proteolysis |
| GI_15451843-I | 4283.1 | 6794.4 | 5584  | ADAM19  | <a href="#">NM_033274.1</a> | MLTNB;FKSG34;MADDAM                   | zinc ion    | integral to  | proteolysis |
| GI_15451847-I | 127.3  | 148.8  | 128.6 | NR6A1   | <a href="#">NM_033334.1</a> | RTR;GCNF;NR61;GCNF1                   | ligand-     | nucleus      | spermatog   |
| GI_15451849-A | 82     | 99.2   | 83.9  | NR6A1   | <a href="#">NM_033335.1</a> | RTR;GCNF;NR61;GCNF1                   | ligand-     | nucleus      | spermatog   |
| GI_15451851-A | 491.8  | 702.4  | 581.9 | MID1    | <a href="#">NM_033290.1</a> | OS;FXY;OSX;OGS1;XPRF;BBBG1;G BBB1;R   | protein     | microtubul   | pattern     |
| GI_15451851-I | 100.4  | 104.6  | 120.5 | MID1    | <a href="#">NM_033290.1</a> | OS;FXY;OSX;OGS1;XPRF;BBBG1;G BBB1;R   | protein     | microtubul   | pattern     |
| GI_15451855-S | 1474.9 | 1303.1 | 868.3 | CAV1    | <a href="#">NM_001753.3</a> | CAV;VIP21                             | structural  | caveola      |             |
| GI_15451858-A | 92.8   | 91.1   | 87.9  | CAV3    | <a href="#">NM_001234.3</a> | VIP21;LGMD1C;VIP-21                   |             | caveola      | muscle      |
| GI_15451859-I | 104.2  | 129.9  | 110.1 | CAV3    | <a href="#">NM_033337.1</a> | VIP21;LGMD1C;VIP-21                   |             | caveola      | muscle      |
| GI_15451863-A | 151.1  | 191.5  | 181   | B3GNT1  | <a href="#">NM_033252.1</a> | B3GNT;B3GN-T1;B3GN-T2;B3GNT-          | N-          | Golgi        | protein     |
| GI_15451865-A | 190.3  | 274    | 313   | LRP8    | <a href="#">NM_017522.2</a> | APOER2;HSZ75190                       | LDL         | plasma       | lipid       |
| GI_15451869-I | 117.5  | 104.4  | 105.8 | LRP8    | <a href="#">NM_004631.2</a> | APOER2;HSZ75190                       | LDL         | plasma       | lipid       |
| GI_15451870-S | 159.5  | 191.4  | 185   | B3GALT1 | <a href="#">NM_020981.2</a> | beta3Gal-T1                           | UDP-        | Golgi        | protein     |
| GI_15451871-S | 99.9   | 90.5   | 86.2  | B3GALT2 | <a href="#">NM_003783.2</a> | GLCT2;BETA3GALT2;beta3Gal-T2          | UDP-        | Golgi        | protein     |
| GI_15451872-S | 111.6  | 120.6  | 153.8 | B3GALT4 | <a href="#">NM_003782.2</a> | GalT4;Gal-                            | UDP-        | Golgi        | protein     |
| GI_15451873-I | 90.1   | 299.5  | 95.1  | B3GALT3 | <a href="#">NM_003781.2</a> | P;P1;GLCT3;galT3;beta3Gal-T3          | UDP-        | Golgi        | protein     |
| GI_15451876-I | 75.1   | 73.8   | 73.2  | B3GALT3 | <a href="#">NM_033168.1</a> | P;P1;GLCT3;galT3;beta3Gal-T3          | UDP-        | Golgi        | protein     |
| GI_15451878-A | 108.4  | 184.9  | 111.5 | B3GALT3 | <a href="#">NM_033169.1</a> | P;P1;GLCT3;galT3;beta3Gal-T3          | UDP-        | Golgi        | protein     |
| GI_15451878-I | 127.4  | 134.3  | 113   | B3GALT3 | <a href="#">NM_033169.1</a> | P;P1;GLCT3;galT3;beta3Gal-T3          | UDP-        | Golgi        | protein     |
| GI_15451880-A | 165.2  | 191.7  | 164.1 | B3GALT5 | <a href="#">NM_033170.1</a> | B3T5;GLCT5;B3GalTx;B3GalT-V;beta3Gal- | UDP-        | Golgi        | protein     |
| GI_15451886-I | 98.2   | 102.8  | 94.7  | B3GALT5 | <a href="#">NM_033173.1</a> | B3T5;GLCT5;B3GalTx;B3GalT-V;beta3Gal- | UDP-        | Golgi        | protein     |

|               |        |        |        |          |                             |                                       |                           |              |
|---------------|--------|--------|--------|----------|-----------------------------|---------------------------------------|---------------------------|--------------|
| GI_15451888-A | 148.2  | 103    | 211.1  | GAD1     | <a href="#">NM_013445.2</a> | GAD;GAD25;GAD67                       |                           | glutamate    |
| GI_15451888-I | 331.4  | 274    | 487.8  | GAD1     | <a href="#">NM_013445.2</a> | GAD;GAD25;GAD67                       |                           | glutamate    |
| GI_15451891-S | 1647.6 | 2053.2 | 1646.9 | EIF5B    | <a href="#">NM_015904.2</a> | IF2;FLJ10524;KIAA0741;DKFZp434I036    | translation nucleus       | translation  |
| GI_15451894-S | 100.5  | 110.4  | 105.8  | B3GNT3   | <a href="#">NM_014256.2</a> | TMEM3;B3GN-T3;B3GNT-                  | galactosylt Golgi         | protein      |
| GI_15451896-I | 88.1   | 101    | 87.7   | CCR2     | <a href="#">NM_000647.3</a> | CKR2;CCR2A;CCR2B;CKR2A;CKR2B;CMKB     | chemokine soluble         | negative     |
| GI_15451899-S | 186.9  | 238.2  | 217.2  | FGF3     | <a href="#">NM_005247.2</a> | INT2;HBGF-3                           | growth extracellul        | embryoge     |
| GI_15451900-S | 267.5  | 263.5  | 172.9  | KCNK1    | <a href="#">NM_002245.2</a> | DPK;HOHO;TWIK1;TWIK-1                 | inward voltage-           | potassium    |
| GI_15451901-S | 284.4  | 270.2  | 255.9  | MAP4K3   | <a href="#">NM_003618.2</a> | GLK;MAPKKK3;RAB8IPL1                  | protein                   | JNK          |
| GI_15451903-S | 127.6  | 164.1  | 143.8  | MOX2     | <a href="#">NM_005944.3</a> | MRC;MOX1;OX-2;CD200                   |                           | integral to  |
| GI_15451905-S | 117.4  | 137.6  | 133.8  | NAALAD2  | <a href="#">NM_005467.2</a> | NAADALASE2;NAALADASE2                 | dipeptidyl- integral to   | proteolysis  |
| GI_15451906-S | 835    | 1108.6 | 866.8  | NPEPPS   | <a href="#">NM_006310.2</a> | PSA;MP100                             | aminopept cytosol         | proteolysis  |
| GI_15451908-A | 2362.1 | 1304.1 | 837.8  | CASP4    | <a href="#">NM_001225.2</a> | TX;ICH-2;Mih1/TX;ICEREL-II;ICE(rel)II | thiol cytoplasm           | induction    |
| GI_15451909-I | 116.6  | 103.2  | 98.9   | CASP4    | <a href="#">NM_033306.1</a> | TX;ICH-2;Mih1/TX;ICEREL-II;ICE(rel)II | thiol cytoplasm           | induction    |
| GI_15451911-I | 94.6   | 96.1   | 92.3   | CASP4    | <a href="#">NM_033307.1</a> | TX;ICH-2;Mih1/TX;ICEREL-II;ICE(rel)II | thiol cytoplasm           | induction    |
| GI_15451913-S | 126.9  | 114.3  | 118.7  | BAIAP3   | <a href="#">NM_003933.3</a> | BAP3;KIAA0734                         | protein C-                | neurotran    |
| GI_15451920-A | 113.9  | 125.4  | 126.2  | PDGFD    | <a href="#">NM_033135.1</a> | IEGF;MSTP036;SCDGF-B                  |                           |              |
| GI_15451924-S | 5230.5 | 6126.4 | 8306.9 | SPOCK    | <a href="#">NM_004598.2</a> | TIC1;SPOCK1;TESTICAN                  | proteoglyc extracellul    | cell         |
| GI_15451925-S | 151.3  | 181.3  | 165.3  | PIK3C2B  | <a href="#">NM_002646.2</a> | C2-PI3K                               | phosphati microsom        | intracellula |
| GI_15451927-S | 132.7  | 156.2  | 129.7  | PIK3C2G  | <a href="#">NM_004570.2</a> | PI3K-C2GAMMA                          | 1- membran                | intracellula |
| GI_15451928-I | 139.9  | 125.5  | 123.8  | CDC14A   | <a href="#">NM_003672.2</a> | cdc14;hCDC14;Cdc14A1;Cdc14A2          | protein nucleus           | regulation   |
| GI_15451930-I | 103.4  | 104.5  | 97.5   | CDC14A   | <a href="#">NM_033312.1</a> | cdc14;hCDC14;Cdc14A1;Cdc14A2          | protein nucleus           | regulation   |
| GI_15451932-A | 107.8  | 112.4  | 100.6  | CDC14A   | <a href="#">NM_033313.1</a> | cdc14;hCDC14;Cdc14A1;Cdc14A2          | protein nucleus           | regulation   |
| GI_15451932-I | 99.3   | 85.3   | 81.7   | CDC14A   | <a href="#">NM_033313.1</a> | cdc14;hCDC14;Cdc14A1;Cdc14A2          | protein nucleus           | regulation   |
| GI_15451934-A | 120.7  | 133.5  | 123.5  | CDC14B   | <a href="#">NM_003671.2</a> | CDC14B3;Cdc14B1;Cdc14B2;hCDC14B       |                           |              |
| GI_15451934-I | 1763.6 | 2355.6 | 1900.1 | CDC14B   | <a href="#">NM_003671.2</a> | CDC14B3;Cdc14B1;Cdc14B2;hCDC14B       |                           |              |
| GI_15451935-I | 194.3  | 167.8  | 187.7  | CDC14B   | <a href="#">NM_033331.1</a> | CDC14B3;Cdc14B1;Cdc14B2;hCDC14B       |                           |              |
| GI_15451937-I | 113.1  | 107.1  | 115.8  | CDC14B   | <a href="#">NM_033332.1</a> | CDC14B3;Cdc14B1;Cdc14B2;hCDC14B       |                           |              |
| GI_15451941-S | 7415.8 | 7135.2 | 6042.7 | UBA52    | <a href="#">NM_003333.2</a> | CEP52;RPL40;HUBCEP52                  | ubiquitin cytoplasm       | protein      |
| GI_15451942-S | 84.4   | 92.7   | 83.7   | ZNF6     | <a href="#">NM_021998.2</a> | ZNF4;ZNF5;CMPX1                       | transcripti nucleus       | regulation   |
| GI_15487665-A | 98.6   | 112.7  | 104    | NXF5     | <a href="#">NM_033154.1</a> |                                       | RNA nucleus               | transport    |
| GI_15487667-I | 89.1   | 95     | 99.4   | NXF5     | <a href="#">NM_033155.1</a> |                                       | RNA nucleus               | transport    |
| GI_15529971-S | 205.9  | 257.1  | 226.5  | MCART1   | <a href="#">NM_033412.1</a> | CG7943;MGC14836                       | binding mitochond         | transport    |
| GI_15529981-S | 2127.6 | 1989.1 | 2021.4 | IMP4     | <a href="#">NM_033416.1</a> | MGC19606                              |                           |              |
| GI_15529995-S | 237.1  | 260.4  | 250.7  | SOS1     | <a href="#">NM_005633.2</a> | GF1;HGF;GGF1;GINGF                    | Rho                       | RAS          |
| GI_15553096-S | 646.8  | 569.3  | 505.5  | MGC9084  | <a href="#">NM_033418.1</a> |                                       |                           |              |
| GI_15559204-S | 344.9  | 319.2  | 180.7  | SLAMF9   | <a href="#">NM_033438.1</a> | SF2001;CD2F-10;CD84-H1                |                           |              |
| GI_15559206-S | 131    | 131.7  | 112.6  | ELA2A    | <a href="#">NM_033440.1</a> |                                       | pancreatic                | proteolysis  |
| GI_15559208-S | 109    | 129.9  | 126.6  | C9orf26  | <a href="#">NM_033439.1</a> | DVS27;NF-HEV;DKFZp586H0523            |                           |              |
| GI_15618994-S | 103.4  | 118    | 108.6  | KRT6IRS  | <a href="#">NM_033448.1</a> | K6IRS1;KRT6IRS1                       |                           | kinesin      |
| GI_15619000-S | 436.2  | 522.9  | 514.8  | CGB1     | <a href="#">NM_033377.1</a> |                                       |                           |              |
| GI_15619002-S | 101.8  | 92.9   | 102.5  | CGB2     | <a href="#">NM_033378.1</a> |                                       |                           |              |
| GI_15619004-S | 90.4   | 91     | 102.7  | KRTAP1-1 | <a href="#">NM_030967.2</a> | HB2A;KAP1.1;KAP1.6;KAP1.7;KAP1.1A;KAP | structural intermedia     | biological_  |
| GI_15619005-S | 215.7  | 243    | 224    | VIPR1    | <a href="#">NM_004624.2</a> | II;HVR1;RCD1;RDC1;VIPR;VIRG;VPAC1;PA  | vasoactive integral to    | positive     |
| GI_15619007-A | 137.6  | 131.5  | 125.7  | VPS13A   | <a href="#">NM_015186.1</a> | CHAC;KIAA0986                         | intracellula intracellula | protein      |

|               |         |        |        |           |                             |                                  |              |              |               |
|---------------|---------|--------|--------|-----------|-----------------------------|----------------------------------|--------------|--------------|---------------|
| GI_15619007-I | 85.5    | 104.7  | 86.9   | VPS13A    | <a href="#">NM_015186.1</a> | CHAC;KIAA0986                    | intracellula | intracellula | protein       |
| GI_15619009-I | 287.9   | 363.9  | 302    | VPS13A    | <a href="#">NM_033305.1</a> | CHAC;KIAA0986                    | intracellula | intracellula | protein       |
| GI_15619014-S | 112.1   | 119.1  | 103.7  | PRKACG    | <a href="#">NM_002732.2</a> | KAPG                             | cAMP-        |              | male          |
| GI_15619016-I | 282.7   | 241.5  | 219.7  | PTPN22    | <a href="#">NM_015967.2</a> | LYP;Lyp1;Lyp2                    | protein      |              | signal        |
| GI_15619017-A | 274.7   | 287.6  | 239.6  | PTPN22    | <a href="#">NM_012411.2</a> | LYP;Lyp1;Lyp2                    | protein      |              | signal        |
| GI_15619017-I | 91.7    | 91.5   | 86.2   | PTPN22    | <a href="#">NM_012411.2</a> | LYP;Lyp1;Lyp2                    | protein      |              | signal        |
| GI_15627000-S | 89.9    | 105.1  | 92.5   | ZNF257    | <a href="#">NM_033468.1</a> | BMZF4;BMZF-4                     | zinc ion     | nucleus      | regulation    |
| GI_15718669-S | 93.5    | 90     | 92.5   | ADRA2A    | <a href="#">NM_000681.2</a> | ADRA2;ADRAR;ZNF32;ADRA2R         | alpha2-      | integral to  | activation    |
| GI_15718672-S | 150.1   | 151.5  | 149.9  | ADRA2C    | <a href="#">NM_000683.2</a> | ADRA2L2;ADRARL2;ADRA2RL2         | alpha2-      | endosome     | activation    |
| GI_15718673-S | 454.9   | 551.7  | 445.3  | ADRB2     | <a href="#">NM_000024.3</a> | BAR;B2AR;ADRB;ADRB2R             | beta2-       | endosome     | transmem      |
| GI_15718674-S | 358.2   | 531.1  | 491.2  | ALOX5AP   | <a href="#">NM_001629.2</a> | FLAP                             | enzyme       | integral to  | leukotrien    |
| GI_15718677-S | 2158.1  | 2028.7 | 1984.7 | DGCR6L    | <a href="#">NM_033257.2</a> | FLJ10666                         | transcripti  | kinesin      | regulation    |
| GI_15718678-S | 249.7   | 303.4  | 266.9  | INHBC     | <a href="#">NM_005538.2</a> | IHBC                             | transformi   | extracellul  | cell growth   |
| GI_15718681-S | 167.2   | 227.3  | 204.5  | LAG3      | <a href="#">NM_002286.4</a> | CD223                            | antigen      | integral to  |               |
| GI_15718683-S | 439.7   | 562.3  | 673.7  | SERTAD3   | <a href="#">NM_013368.2</a> | RBT1                             |              |              |               |
| GI_15718685-S | 95      | 101.2  | 114.3  | RPL10     | <a href="#">NM_006013.2</a> | QM;NOV;DXS648;DXS648E;FLJ23544   | tumor        | cytosolic    |               |
| GI_15718686-S | 20285.9 | 16704  | 13764  | RPS3      | <a href="#">NM_001005.2</a> |                                  | structural   | cytosolic    | protein       |
| GI_15718688-A | 27936.5 | 24981  | 21840  | RPS3A     | <a href="#">NM_001006.2</a> | FTE1                             | structural   | cytosolic    | protein       |
| GI_15718701-A | 206.1   | 221.9  | 213.8  | CASP7     | <a href="#">NM_033340.1</a> | MCH3;CMH-1;ICE-LAP3              | cysteine-    | cytoplasm    | apoptotic     |
| GI_15718701-I | 81      | 80.1   | 78.9   | CASP7     | <a href="#">NM_033340.1</a> | MCH3;CMH-1;ICE-LAP3              | cysteine-    | cytoplasm    | apoptotic     |
| GI_15718703-I | 90.7    | 97.4   | 89.5   | CASP8     | <a href="#">NM_001228.2</a> | MACH;MCH5;FLICE                  | caspase-8    | cytoskelet   | apoptotic     |
| GI_15718707-I | 90.1    | 106.8  | 85.9   | CASP8     | <a href="#">NM_033356.1</a> | MACH;MCH5;FLICE                  | caspase-8    | cytoskelet   | apoptotic     |
| GI_15718709-I | 86.1    | 92.8   | 97     | CASP8     | <a href="#">NM_033357.1</a> | MACH;MCH5;FLICE                  | caspase-8    | cytoskelet   | apoptotic     |
| GI_15718711-A | 153.7   | 158.2  | 144.4  | CASP8     | <a href="#">NM_033358.1</a> | MACH;MCH5;FLICE                  | caspase-8    | cytoskelet   | apoptotic     |
| GI_15718713-S | 103.2   | 105.9  | 91.3   | HIST1H2AI | <a href="#">NM_003509.2</a> | H2A/c;H2AFC                      |              |              |               |
| GI_15718714-S | 105     | 112.6  | 114.4  | HIST1H2AK | <a href="#">NM_003510.2</a> | H2A/d;H2AFD;HIST1H2AI            | DNA          | chromoso     | nucleoso      |
| GI_15718715-S | 68.4    | 63.3   | 70.4   | HIST1H2AJ | <a href="#">NM_021066.2</a> | H2A/E;H2AFE;HIST1H2AK;dJ160A22.4 | DNA          | chromoso     | nucleoso      |
| GI_15718716-S | 127     | 140.4  | 130.2  | HIST1H1B  | <a href="#">NM_005322.2</a> | H1;H1.5;H1F5                     | DNA          | chromoso     | nucleoso      |
| GI_15718717-S | 101.6   | 118.6  | 107.4  | HIST1H2AL | <a href="#">NM_003511.2</a> | H2A.i;H2A/i;H2AFI;dJ193B12.9     | DNA          | chromoso     | nucleoso      |
| GI_15718718-S | 102.8   | 128.3  | 110.6  | HIST1H2AM | <a href="#">NM_003514.2</a> | H2A.1;H2A/n;H2AFN;dJ193B12.1     |              |              |               |
| GI_15718719-S | 140.5   | 168.6  | 157.9  | HIST1H2BL | <a href="#">NM_003519.3</a> | H2B/c;H2BFC;dJ97D16.4            | DNA          | chromoso     | nucleoso      |
| GI_15718720-S | 113.4   | 100    | 109.7  | HIST1H2BN | <a href="#">NM_003520.3</a> | H2B/d;H2BFD;MGC9388              | DNA          | chromoso     | nucleoso      |
| GI_15718721-S | 285.1   | 357.2  | 322.4  | HIST1H2BM | <a href="#">NM_003521.2</a> | H2B/e;H2BFE;dJ160A22.3           | DNA          | chromoso     | nucleoso      |
| GI_15718723-S | 113.4   | 130.5  | 118.1  | HIST1H3I  | <a href="#">NM_003533.2</a> | H3.f;H3/f;H3FF                   |              |              |               |
| GI_15718724-S | 273.2   | 320.7  | 303.2  | HIST1H3J  | <a href="#">NM_003535.2</a> | H3/j;H3FJ                        |              |              |               |
| GI_15718725-S | 136.4   | 219.2  | 170.1  | HIST1H3H  | <a href="#">NM_003536.2</a> | H3/k;H3FK;H3F1K                  | DNA          | chromoso     | nucleoso      |
| GI_15718726-S | 110.4   | 109.8  | 98     | HIST1H4K  | <a href="#">NM_003541.2</a> | H4/D;H4FD;dJ160A22.1             |              |              |               |
| GI_15718728-S | 88.7    | 95.4   | 94.9   | HIST1H4L  | <a href="#">NM_003546.2</a> | H4.k;H4/k;H4FK                   |              |              |               |
| GI_15718764-I | 190.4   | 234.6  | 226    | KCNK4     | <a href="#">NM_016611.2</a> | TRAAK;DKFZP566E164               | potassium    |              | potassium     |
| GI_15718766-A | 122.3   | 123.6  | 111.5  | KCNK4     | <a href="#">NM_033310.1</a> | TRAAK;DKFZP566E164               | potassium    |              | potassium     |
| GI_15718766-I | 154.2   | 175    | 162.7  | KCNK4     | <a href="#">NM_033310.1</a> | TRAAK;DKFZP566E164               | potassium    |              | potassium     |
| GI_15718768-I | 124.7   | 122.2  | 109.3  | KCNK4     | <a href="#">NM_033311.1</a> | TRAAK;DKFZP566E164               | potassium    |              | potassium     |
| GI_15718770-S | 114.8   | 123.8  | 117.4  | KCNK5     | <a href="#">NM_003740.2</a> | TASK2;TASK-2;FLJ11035            | potassium    | membran      | potassium     |
| GI_15718773-S | 414.5   | 545.6  | 564.1  | SPA17     | <a href="#">NM_017425.2</a> | SP17;SP17-1                      | cAMP-        | membran      | fertilization |

|               |         |        |        |          |                             |                                      |               |             |               |
|---------------|---------|--------|--------|----------|-----------------------------|--------------------------------------|---------------|-------------|---------------|
| GI_15721936-S | 2505.6  | 2752.1 | 2572.5 | MRPS24   | <a href="#">NM_032014.1</a> | HSPC335;MRP-S24                      |               |             |               |
| GI_15723369-S | 125.3   | 135    | 120.2  | SLC38A5  | <a href="#">NM_033518.1</a> | SN2;JM24                             |               |             |               |
| GI_15723373-S | 98.7    | 109.6  | 88     | sdolf    | <a href="#">NM_033519.1</a> |                                      | olfactory     | integral to | olfaction     |
| GI_15743546-S | 937     | 792.6  | 668.9  | NOL7     | <a href="#">NM_016167.3</a> | RARG-1;dJ223E5.2                     |               |             |               |
| GI_15743547-S | 96.2    | 110.2  | 92.7   | LIMS3    | <a href="#">NM_033514.1</a> |                                      |               |             |               |
| GI_15743557-S | 147.7   | 184.9  | 158.9  | KRTAP2-4 | <a href="#">NM_033184.2</a> | KAP2.4;KRTAP2.4                      |               |             |               |
| GI_15812177-S | 251.4   | 219.1  | 209.5  | ZFP36L2  | <a href="#">NM_006887.3</a> | BRF2;ERF2;ERF-2;TIS11D               | transcripti   | nucleus     | oncogene      |
| GI_15812179-S | 22079.1 | 15543  | 8170.6 | ZFP36L1  | <a href="#">NM_004926.2</a> | BRF1;ERF1;cMG1;ERF-1;Berg36;TIS11B   | transcripti   | nucleus     |               |
| GI_15812181-S | 124.6   | 138.7  | 129.7  | ADAM20   | <a href="#">NM_003814.3</a> |                                      | metallope     | integral to | fertilization |
| GI_15812182-S | 117     | 113.9  | 95.7   | ADAM21   | <a href="#">NM_003813.2</a> | ADAM31                               | metallope     | integral to | fertilization |
| GI_15812185-I | 218.2   | 283.3  | 308.9  | FBXO3    | <a href="#">NM_012175.2</a> | FBA;FBX3;DKFZp564B092                | ubiquitin     |             | proteolysis   |
| GI_15812187-A | 295.3   | 404.3  | 434.4  | FBXO3    | <a href="#">NM_033406.1</a> | FBA;FBX3;DKFZp564B092                | ubiquitin     |             | proteolysis   |
| GI_15812187-I | 109.7   | 119    | 98.5   | FBXO3    | <a href="#">NM_033406.1</a> | FBA;FBX3;DKFZp564B092                | ubiquitin     |             | proteolysis   |
| GI_15812190-S | 1080.2  | 674.3  | 692    | FBXO5    | <a href="#">NM_012177.2</a> | EMI1;FBX5                            | ubiquitin     |             | proteolysis   |
| GI_15812191-S | 222.2   | 202    | 232.8  | FBXO6    | <a href="#">NM_018438.2</a> | FBG2;FBX6                            | ubiquitin     |             | proteolysis   |
| GI_15812192-S | 1407.5  | 1749.1 | 1767   | FBXO7    | <a href="#">NM_012179.2</a> | FBX;FBX7;FBX07                       | ubiquitin-    | ubiquitin   | ubiquitin-    |
| GI_15812194-A | 121.8   | 106.1  | 108.1  | FBXO24   | <a href="#">NM_012172.2</a> | FBX24;DKFZp43411122                  | ubiquitin-    | ubiquitin   | protein       |
| GI_15812195-I | 123.1   | 143    | 138.5  | FBXO24   | <a href="#">NM_033506.1</a> | FBX24;DKFZp43411122                  | ubiquitin-    | ubiquitin   | protein       |
| GI_15812197-S | 353.8   | 479.3  | 412.7  | FBXO2    | <a href="#">NM_012168.2</a> | FBG1;FBX2;NFB42                      | ubiquitin     |             | proteolysis   |
| GI_15812199-A | 1301.2  | 1369.6 | 1383.8 | FBXO9    | <a href="#">NM_012347.2</a> | FBX9;NY-REN-57;DKFZp434C0118         |               |             |               |
| GI_15812199-I | 74.2    | 70.6   | 63.9   | FBXO9    | <a href="#">NM_012347.2</a> | FBX9;NY-REN-57;DKFZp434C0118         |               |             |               |
| GI_15812200-I | 94.7    | 102.6  | 90.9   | FBXO9    | <a href="#">NM_033480.1</a> | FBX9;NY-REN-57;DKFZp434C0118         |               |             |               |
| GI_15812202-I | 131.5   | 127.8  | 126.4  | FBXO9    | <a href="#">NM_033481.1</a> | FBX9;NY-REN-57;DKFZp434C0118         |               |             |               |
| GI_15812204-S | 91.7    | 94.1   | 100    | KRTAP3-2 | <a href="#">NM_031959.2</a> | KAP3.2;KRTAP3.2                      |               | intermedia  |               |
| GI_15812205-S | 89.2    | 80.6   | 88     | KRTAP3-3 | <a href="#">NM_033185.2</a> | KAP3.3;KRTAP3.3                      |               | intermedia  |               |
| GI_15812207-S | 1093.9  | 1038   | 1282.3 | FBXO8    | <a href="#">NM_012180.1</a> | FBS;DC10;FBX8                        | ubiquitin     | ubiquitin   | proteolysis   |
| GI_15812211-A | 112.3   | 126.6  | 123    | PDE5A    | <a href="#">NM_033430.1</a> | CN5A;PDE5;PDE5A1;CGB-PDE             | 3',5'-cyclic- | cellular_co | cyclic        |
| GI_15812215-I | 113.3   | 112.4  | 94.4   | PDE5A    | <a href="#">NM_033437.1</a> | CN5A;PDE5;PDE5A1;CGB-PDE             | 3',5'-cyclic- | cellular_co | cyclic        |
| GI_15812217-S | 173.2   | 204.5  | 185.1  | RBM8A    | <a href="#">NM_005105.2</a> | Y14;RBM8;ZNRP;RBM8B;ZRNP1;BOV-       | mRNA          | cytoplasm   | RNA           |
| GI_15812218-S | 13746.4 | 12051  | 9780.2 | RPL30    | <a href="#">NM_000989.2</a> |                                      | structural    | cytosolic   | protein       |
| GI_15812219-S | 29261.4 | 26115  | 20609  | RPL31    | <a href="#">NM_000993.2</a> |                                      | structural    | cytosolic   | protein       |
| GI_15812220-S | 23694.3 | 23802  | 18069  | RPL32    | <a href="#">NM_000994.2</a> |                                      | structural    | cytosolic   | protein       |
| GI_15812223-A | 419.8   | 516.1  | 387.7  | TRERF1   | <a href="#">NM_033501.1</a> | RAPA;TReP-132;HSA277276;dJ139D8.5    |               |             |               |
| GI_15812225-I | 170     | 197.7  | 168.3  | TRERF1   | <a href="#">NM_033502.1</a> | RAPA;TReP-132;HSA277276;dJ139D8.5    |               |             |               |
| GI_15834618-A | 134.2   | 155.3  | 127.6  | FBXO4    | <a href="#">NM_012176.1</a> | FBX4;FLJ10141;DKFZp547N213           |               |             |               |
| GI_15834618-I | 493.8   | 461.2  | 396.8  | FBXO4    | <a href="#">NM_012176.1</a> | FBX4;FLJ10141;DKFZp547N213           |               |             |               |
| GI_15834620-I | 105.3   | 100.8  | 98.3   | FBXO4    | <a href="#">NM_033484.1</a> | FBX4;FLJ10141;DKFZp547N213           |               |             |               |
| GI_15834622-S | 171.8   | 219.8  | 175.2  | SLPI     | <a href="#">NM_003064.2</a> | ALP;ALK1;BLPI;HUSI;WAP4;WFDC4;HUSI-I | endopepti     |             |               |
| GI_15834623-S | 1802.1  | 1446.1 | 1360   | SRPK1    | <a href="#">NM_003137.2</a> | SFRSK1                               | cell cycle    | nucleus     | RNA           |
| GI_15887357-S | 95.5    | 101    | 89     | GUCA1B   | <a href="#">NM_002098.2</a> | GCAP2;GUCA2                          | calcium       |             | receptor      |
| GI_15890082-S | 141.4   | 155.9  | 148.1  | REST     | <a href="#">NM_005612.3</a> | XBR;NRSF                             |               |             |               |
| GI_15890083-S | 98.7    | 96.1   | 76     | COL4A4   | <a href="#">NM_000092.2</a> | CA44                                 | collagen      | collagen    | regulation    |
| GI_15890084-A | 691.9   | 1606.6 | 1386.1 | COL4A5   | <a href="#">NM_000495.3</a> | ATS;ASLN;CA54                        | collagen      | collagen    |               |
| GI_15967154-I | 215     | 328    | 435    | SCAND1   | <a href="#">NM_016558.2</a> | RAZ1;SDP1                            | transcripti   | nucleus     | regulation    |

|               |         |        |        |            |                             |                                    |             |             |             |
|---------------|---------|--------|--------|------------|-----------------------------|------------------------------------|-------------|-------------|-------------|
| GI_15967155-A | 1045.9  | 1713.1 | 2110.2 | SCAND1     | <a href="#">NM_033630.1</a> | RAZ1;SDP1                          | transcripti | nucleus     | regulation  |
| GI_15967157-I | 87.1    | 90.4   | 78.1   | GCK        | <a href="#">NM_000162.2</a> | GK;GLK;HK4;HKIV;HXKP;MODY2;NIDDM   | glucokinas  |             | glycolysis  |
| GI_15967158-A | 152.5   | 160.6  | 149    | GCK        | <a href="#">NM_033507.1</a> | GK;GLK;HK4;HKIV;HXKP;MODY2;NIDDM   | glucokinas  |             | glycolysis  |
| GI_15967160-I | 121     | 135.4  | 122.4  | GCK        | <a href="#">NM_033508.1</a> | GK;GLK;HK4;HKIV;HXKP;MODY2;NIDDM   | glucokinas  |             | glycolysis  |
| GI_15991812-S | 97.9    | 114.1  | 100    | MMEL2      | <a href="#">NM_033467.1</a> | NL2                                | metallope   | membran     | proteolysis |
| GI_15991814-I | 92.3    | 93     | 87.8   | SCAND2     | <a href="#">NM_022050.2</a> |                                    | molecular   | nucleus     | regulation  |
| GI_15991816-I | 93.8    | 96.8   | 92.1   | SCAND2     | <a href="#">NM_033633.1</a> |                                    | molecular   | nucleus     | regulation  |
| GI_15991818-I | 103.3   | 102    | 100.8  | SCAND2     | <a href="#">NM_033634.1</a> |                                    | molecular   | nucleus     | regulation  |
| GI_15991820-A | 118.8   | 128.9  | 118.6  | SCAND2     | <a href="#">NM_033635.1</a> |                                    | molecular   | nucleus     | regulation  |
| GI_15991824-I | 114.7   | 135    | 119.5  | SCAND2     | <a href="#">NM_033640.1</a> |                                    | molecular   | nucleus     | regulation  |
| GI_15991826-I | 118.7   | 120.3  | 113.5  | HK1        | <a href="#">NM_033496.1</a> | HKI;HXK1                           | hexokinas   | membran     | glycolysis  |
| GI_15991832-I | 84.8    | 92     | 89.4   | HK1        | <a href="#">NM_033500.1</a> | HKI;HXK1                           | hexokinas   | membran     | glycolysis  |
| GI_16117774-S | 161.3   | 192.5  | 174    | R29124_1   | <a href="#">NM_033543.1</a> | FLJ13540                           |             |             |             |
| GI_16117776-S | 87.4    | 100.6  | 82.6   | RGS8       | <a href="#">NM_033345.1</a> |                                    | signal      |             | signal      |
| GI_16117778-A | 461.7   | 468.6  | 433.9  | FBXW7      | <a href="#">NM_018315.2</a> | AGO;CDC4;FBW7;FBX30;FBXW6;SEL10;SE |             |             |             |
| GI_16117778-I | 124.6   | 125.1  | 117.8  | FBXW7      | <a href="#">NM_018315.2</a> | AGO;CDC4;FBW7;FBX30;FBXW6;SEL10;SE |             |             |             |
| GI_16117780-I | 272.8   | 299.8  | 274.5  | FBXW7      | <a href="#">NM_033632.1</a> | AGO;CDC4;FBW7;FBX30;FBXW6;SEL10;SE |             |             |             |
| GI_16117786-A | 632.9   | 889.9  | 654.3  | RPL34      | <a href="#">NM_000995.2</a> |                                    | structural  | cytosolic   | protein     |
| GI_16117788-I | 1137.9  | 1570.6 | 1209.4 | RPL34      | <a href="#">NM_033625.1</a> |                                    | structural  | cytosolic   | protein     |
| GI_16117790-S | 31893.6 | 30889  | 23885  | RPL35A     | <a href="#">NM_000996.2</a> |                                    | structural  | cytosolic   | protein     |
| GI_16117792-S | 41467.1 | 36165  | 28536  | RPL35      | <a href="#">NM_007209.2</a> |                                    | structural  | cytosolic   | protein     |
| GI_16117793-I | 266.9   | 314.8  | 337.3  | RPL36      | <a href="#">NM_015414.2</a> | DKFZP566B023                       | structural  | cytosolic   | protein     |
| GI_16117795-A | 27158.5 | 22326  | 20164  | RPL36      | <a href="#">NM_033643.1</a> | DKFZP566B023                       | structural  | cytosolic   | protein     |
| GI_16118221-S | 142     | 157.9  | 155    | KRTAP4-10  | <a href="#">NM_033060.2</a> | KAP4.10;KRTAP4.10                  |             | intermedia  |             |
| GI_16118222-S | 96.2    | 116    | 103    | KRTAP4-14  | <a href="#">NM_033059.2</a> | KAP4.14;KRTAP4.14                  | receptor    | intermedia  |             |
| GI_16118223-S | 159.9   | 174.1  | 148.3  | KRTAP4-2   | <a href="#">NM_033062.2</a> | KAP4.2;KRTAP4.2                    | receptor    | intermedia  |             |
| GI_16118224-S | 154.7   | 185.7  | 163.1  | KRTAP4-5   | <a href="#">NM_033188.2</a> | KAP4.5;KRTAP4.5                    | sugar       | intermedia  |             |
| GI_16118226-S | 103.7   | 111.2  | 111.8  | KRTAP4-7   | <a href="#">NM_033061.2</a> | KAP4.7;KRTAP4.7                    |             | intermedia  |             |
| GI_16118228-S | 163.9   | 194.2  | 169.3  | KRTAP9-4   | <a href="#">NM_033191.2</a> | KAP9.4;KRTAP9.4                    |             | intermedia  |             |
| GI_16118230-A | 137.8   | 142.3  | 117.2  | KCNK7      | <a href="#">NM_033347.1</a> | TWIK3                              | potassium   | membran     | potassium   |
| GI_16118236-S | 79.1    | 105    | 86.8   | KRTAP4-12  | <a href="#">NM_031854.2</a> | KAP4.12;KRTAP4.12                  |             | intermedia  |             |
| GI_16118239-S | 105.8   | 108.5  | 97.8   | KRTAP9-2   | <a href="#">NM_031961.2</a> | KAP9.2;KRTAP9.2                    |             |             |             |
| GI_16118241-S | 105.8   | 118.9  | 107.5  | KRTAP9-3   | <a href="#">NM_031962.2</a> | KAP9.3;KRTAP9.3                    | receptor    | intermedia  |             |
| GI_16157523-S | 128.1   | 132.2  | 120.6  | DKFZp762K2 | <a href="#">XM_048721.2</a> |                                    |             |             |             |
| GI_16159362-S | 919     | 222.4  | 275.3  | NEDL2      | <a href="#">XM_038999.2</a> |                                    |             |             |             |
| GI_16262451-S | 149.9   | 173.6  | 130.4  | CGN        | <a href="#">NM_020770.1</a> | KIAA1319                           | actin       | kinesin     | biological_ |
| GI_16306478-S | 485.4   | 572.6  | 735.5  | TSGA14     | <a href="#">NM_018718.1</a> | DKFZp762H1311                      |             |             |             |
| GI_16306484-S | 96.5    | 106.6  | 91.8   | PALMD      | <a href="#">NM_017734.2</a> | PALML;C1orf11;FLJ20271             |             |             |             |
| GI_16306485-S | 157.8   | 175.7  | 152.5  | RBAK       | <a href="#">NM_021163.2</a> |                                    | nucleic     | nucleus     | regulation  |
| GI_16306486-A | 99.5    | 99.5   | 100.2  | CDH7       | <a href="#">NM_033646.1</a> | CDH7L1                             | calcium     | integral to | homophili   |
| GI_16306486-I | 136.9   | 150.2  | 132.7  | CDH7       | <a href="#">NM_033646.1</a> | CDH7L1                             | calcium     | integral to | homophili   |
| GI_16306488-I | 108.2   | 106.6  | 97.2   | CDH7       | <a href="#">NM_004361.2</a> | CDH7L1                             | calcium     | integral to | homophili   |
| GI_16306490-I | 261.3   | 303.6  | 355.9  | CDC2       | <a href="#">NM_001786.2</a> | CDK1                               | cyclin-     | nucleus     | start       |
| GI_16306493-I | 102.8   | 104.6  | 89.4   | FBXW1B     | <a href="#">NM_012300.1</a> | BTRC2;FBW1B;BTRCP2;KIAA0696        | ubiquitin-  | ubiquitin   | protein     |

|               |         |        |        |           |                             |                                       |            |             |             |
|---------------|---------|--------|--------|-----------|-----------------------------|---------------------------------------|------------|-------------|-------------|
| GI_16306495-I | 95.7    | 96.5   | 93.2   | FBXW1B    | <a href="#">NM_033644.1</a> | BTRC2;FBW1B;BTRCP2;KIAA0696           | ubiquitin- | ubiquitin   | protein     |
| GI_16306497-A | 2349.4  | 2680.5 | 2177.5 | FBXW1B    | <a href="#">NM_033645.1</a> | BTRC2;FBW1B;BTRCP2;KIAA0696           | ubiquitin- | ubiquitin   | protein     |
| GI_16306499-A | 1213.7  | 1508.7 | 1389.6 | FBXO21    | <a href="#">NM_015002.1</a> | FBX21;KIAA0875;DKFZp434G058           |            |             |             |
| GI_16306505-S | 304.2   | 317.4  | 336.9  | CASP8AP2  | <a href="#">NM_012115.2</a> | CED-4;FLASH;RIP25;FLJ11208;KIAA1315   | death      |             | induction   |
| GI_16306508-S | 145.9   | 505.8  | 444.7  | CASPR3    | <a href="#">NM_033655.1</a> | FLJ14195;KIAA1714                     |            |             |             |
| GI_16306524-A | 113.7   | 109.3  | 106.7  | CCNB3     | <a href="#">NM_033670.1</a> |                                       |            |             |             |
| GI_16306528-S | 108.6   | 137.9  | 161.4  | CCNA1     | <a href="#">NM_003914.2</a> |                                       | cyclin-    | cytosol     | male        |
| GI_16306529-S | 114     | 151.9  | 137.5  | CDH10     | <a href="#">NM_006727.2</a> |                                       | calcium-   | integral to | homophili   |
| GI_16306531-A | 137.4   | 1389.9 | 488.6  | CDH11     | <a href="#">NM_001797.2</a> | OB;CAD11;CDHOB;OSF-4                  | calcium-   | integral to | skeletal    |
| GI_16306533-I | 134     | 172.8  | 146.2  | CDH11     | <a href="#">NM_033664.1</a> | OB;CAD11;CDHOB;OSF-4                  | calcium-   | integral to | skeletal    |
| GI_16306535-S | 131.8   | 132.6  | 124.3  | CDH19     | <a href="#">NM_021153.2</a> | CDH7;CDH7L2                           | calcium    | integral to | homophili   |
| GI_16306536-S | 105.1   | 121.8  | 108.3  | CDH20     | <a href="#">NM_031891.2</a> | Cdh7;CDH7L3                           | calcium    | integral to | homophili   |
| GI_16306538-S | 95.6    | 88.7   | 103.4  | CDH8      | <a href="#">NM_001796.2</a> |                                       | calcium-   | integral to | cell        |
| GI_16306540-S | 124.5   | 143.5  | 128.1  | CDH9      | <a href="#">NM_016279.2</a> |                                       | calcium    | integral to | homophili   |
| GI_16306542-A | 123.4   | 99.9   | 147.1  | FGF13     | <a href="#">NM_033642.1</a> | FGF2;FHF2                             | growth     | extracellul | signal      |
| GI_16306542-I | 93.6    | 104    | 103.1  | FGF13     | <a href="#">NM_033642.1</a> | FGF2;FHF2                             | growth     | extracellul | signal      |
| GI_16306544-I | 111.3   | 114.6  | 104.9  | FGF13     | <a href="#">NM_004114.2</a> | FGF2;FHF2                             | growth     | extracellul | signal      |
| GI_16306545-A | 138.3   | 170.2  | 142.3  | FGF18     | <a href="#">NM_033649.1</a> | ZFGF5;FGF-18                          | growth     | extracellul | positive    |
| GI_16306547-S | 8080.9  | 7618.1 | 5880.3 | SARS      | <a href="#">NM_006513.2</a> | SERS;SERRS                            | serine-    | soluble     | tRNA        |
| GI_16306549-S | 108.4   | 110.8  | 106.9  | SELENBP1  | <a href="#">NM_003944.2</a> | LPSB;SP56;hSBP;hSP56;FLJ13813         | selenium   |             |             |
| GI_16306551-S | 257.5   | 308.5  | 281.9  | SEMA6C    | <a href="#">NM_030913.2</a> | SEMAY;KIAA1869;m-Sema Y;m-Sema-Y      |            | integral to | neurogene   |
| GI_16306554-S | 111.4   | 162.9  | 125.6  | KCNK13    | <a href="#">NM_022054.2</a> | THIK1;THIK-1                          | voltage-   | integral to | potassium   |
| GI_16306560-S | 13304.5 | 11597  | 9166.5 | RPL37     | <a href="#">NM_000997.2</a> |                                       | structural | cytosolic   | protein     |
| GI_16306561-S | 29378.1 | 25668  | 20501  | RPL37A    | <a href="#">NM_000998.2</a> |                                       | structural | cytosolic   | protein     |
| GI_16306562-S | 26851.6 | 23718  | 20132  | RPL38     | <a href="#">NM_000999.2</a> |                                       | structural | cytosolic   | protein     |
| GI_16306563-S | 20860.9 | 19259  | 16315  | RPL39     | <a href="#">NM_001000.2</a> |                                       | structural | cytosolic   | protein     |
| GI_16306565-S | 161.2   | 198.2  | 161.6  | HIST1H2BO | <a href="#">NM_003527.4</a> | H2B.2;H2B/n;H2BFN;dJ193B12.2          | DNA        | chromoso    | nucleoso    |
| GI_16306567-S | 86.1    | 97.9   | 102    | PAPOLG    | <a href="#">NM_022894.2</a> | FLJ11805;FLJ12972;FLJ13482;FLJ14187   | RNA        | nucleus     | transcripti |
| GI_16306569-S | 1096.6  | 1071.5 | 1068   | MAPK6     | <a href="#">NM_002748.2</a> | ERK3;PRKM6;p97MAPK;HsT17250           | protein    |             | protein     |
| GI_16306577-A | 245.5   | 348.6  | 288.8  | FBXL6     | <a href="#">NM_024555.2</a> | FBL6;FLJ22888                         | ubiquitin  |             | proteolysis |
| GI_16306579-S | 322.3   | 409    | 336.9  | FBXL11    | <a href="#">NM_012308.1</a> | FBL7;CXXC8;FBL11;LILINA;FLJ00115;KIAA | zinc ion   |             | electron    |
| GI_16306581-S | 264.3   | 307.7  | 293.6  | FBXL2     | <a href="#">NM_012157.2</a> | FBL2;FBL3;DKFZP564P0622               | protein    | cytoplasm   | proteolysis |
| GI_16306583-S | 336.7   | 344.6  | 291    | FBXL3A    | <a href="#">NM_012158.1</a> | FBL3;FBL3A                            | ubiquitin  | ubiquitin   | ubiquitin-  |
| GI_16306585-S | 125     | 116    | 116.6  | FBXL3B    | <a href="#">NM_012159.1</a> | FBL3B                                 | ubiquitin  | ubiquitin   | ubiquitin-  |
| GI_16306590-S | 148.8   | 200    | 182.2  | FBXL9     | <a href="#">NM_012163.1</a> | FBL9                                  | ubiquitin  |             | proteolysis |
| GI_16306592-S | 149.3   | 213.9  | 163.7  | HIST1H4J  | <a href="#">NM_021968.3</a> | H4/E;H4FE;dJ160A22.2                  |            |             |             |
| GI_16306593-A | 128.2   | 190.4  | 185.4  | SKP2      | <a href="#">NM_032637.2</a> | FBL1;FLB1;FBXL1;MGC1366               |            |             | G1/S        |
| GI_16306593-I | 487.2   | 781.4  | 791.9  | SKP2      | <a href="#">NM_032637.2</a> | FBL1;FLB1;FBXL1;MGC1366               |            |             | G1/S        |
| GI_16306594-I | 114.7   | 130.3  | 115.9  | SKP2      | <a href="#">NM_005983.2</a> | FBL1;FLB1;FBXL1;MGC1366               |            |             | G1/S        |
| GI_16332359-A | 408.4   | 482    | 486    | CDC2L1    | <a href="#">NM_033487.1</a> | p58;PK58;CLK-1;p58CLK-1;p58CDC2L1     | tumor      | cytoplasm   | protein     |
| GI_16357469-S | 145.4   | 154.9  | 154.8  | CDC6      | <a href="#">NM_001254.2</a> | CDC18L;HsCDC6;HsCDC18                 | nucleotide | cytoplasm   | negative    |
| GI_16357470-I | 884.7   | 887.3  | 573.4  | CDC42     | <a href="#">NM_001791.2</a> | G25K;CDC42Hs                          | Rho small  | filopodium  | actin       |
| GI_16357471-A | 1006.1  | 1365.3 | 697.6  | CDC42     | <a href="#">NM_044472.1</a> | G25K;CDC42Hs                          | Rho small  | filopodium  | actin       |
| GI_16357471-I | 90.6    | 109.6  | 127.6  | CDC42     | <a href="#">NM_044472.1</a> | G25K;CDC42Hs                          | Rho small  | filopodium  | actin       |

|               |        |        |        |           |                             |                                |              |             |              |
|---------------|--------|--------|--------|-----------|-----------------------------|--------------------------------|--------------|-------------|--------------|
| GI_16357473-S | 408.7  | 487.4  | 408.3  | CDC42BPB  | <a href="#">NM_006035.2</a> | MRCKB;KIAA1124                 | protein      | cytoskelet  | regulation   |
| GI_16357476-S | 638.4  | 598.2  | 675.6  | CDC34     | <a href="#">NM_004359.1</a> | UBE2R1;E2-CDC34                | ubiquitin    | nucleus     | DNA          |
| GI_16357489-A | 86.3   | 94.6   | 88.9   | CDC2L2    | <a href="#">NM_033534.1</a> | CDC2L3;p58GTA;PITSLRE          | protein-     | nucleus     | mitosis      |
| GI_16357499-S | 1000.4 | 1020.7 | 1109.5 | CDC5L     | <a href="#">NM_001253.2</a> | hCDC5;PCDC5RP;KIAA0432         | DNA          | nucleus     | cytokinesi   |
| GI_16357500-A | 88.8   | 88.6   | 91     | COL4A6    | <a href="#">NM_001847.1</a> |                                | collagen     | collagen    | oncogene     |
| GI_16357500-I | 261.5  | 303.4  | 274.6  | COL4A6    | <a href="#">NM_001847.1</a> |                                | collagen     | collagen    | oncogene     |
| GI_16357502-I | 97.5   | 121.3  | 92.5   | COL4A6    | <a href="#">NM_033641.1</a> |                                | collagen     | collagen    | oncogene     |
| GI_16418033-S | 130.7  | 185.6  | 90.1   | CG018     | <a href="#">NM_052818.1</a> |                                |              |             |              |
| GI_16418350-S | 540.1  | 586.8  | 582.8  | MGC20255  | <a href="#">NM_052848.1</a> |                                | DNA          | nucleus     | regulation   |
| GI_16418354-S | 213.4  | 316.2  | 239.6  | CREB3L1   | <a href="#">NM_052854.1</a> | OASIS                          | transcripti  | nucleus     | regulation   |
| GI_16418362-S | 198.6  | 204.4  | 217.2  | MGC21675  | <a href="#">NM_052861.1</a> |                                |              |             |              |
| GI_16418366-S | 110.1  | 113    | 97.2   | SCGB3A1   | <a href="#">NM_052863.1</a> | HIN1;HIN-1;LU105;UGRP2;PnSP-2  | cytokine     | extracellul | negative     |
| GI_16418370-S | 79.9   | 92.6   | 78.8   | SNAG1     | <a href="#">NM_052870.1</a> | SNX18                          | protein      | Golgi       | intracellula |
| GI_16418372-S | 96     | 116.3  | 94.8   | MGC4677   | <a href="#">NM_052871.1</a> |                                |              |             |              |
| GI_16418376-S | 596.5  | 779    | 667.2  | MGC16028  | <a href="#">NM_052873.1</a> |                                |              |             |              |
| GI_16418378-S | 106.6  | 112.2  | 109.6  | STX1B2    | <a href="#">NM_052874.1</a> |                                |              |             |              |
| GI_16418390-S | 100.3  | 87.3   | 89.7   | ZIM3      | <a href="#">NM_052882.1</a> |                                | DNA          | nucleus     | regulation   |
| GI_16418392-S | 109.9  | 108.2  | 118.2  | SIGLEC11  | <a href="#">NM_052884.1</a> |                                | lectin [goid | integral to | cell         |
| GI_16418394-S | 153.8  | 175    | 151.2  | SLC2A13   | <a href="#">NM_052885.1</a> | HMIT                           | transporte   | integral to | carbohydr    |
| GI_16418396-S | 106.8  | 105.9  | 101    | MAL2      | <a href="#">NM_052886.1</a> |                                | transporte   | synaptic    | transport    |
| GI_16418400-S | 224.6  | 238    | 203.8  | LOC114659 | <a href="#">NM_052888.1</a> |                                |              |             |              |
| GI_16418404-S | 116.9  | 116.5  | 109.3  | PGLYRP3   | <a href="#">NM_052891.1</a> | PGRPIA                         | protein      | membran     | peptidogly   |
| GI_16418408-S | 3232.8 | 4238.4 | 2902.7 | PORIMIN   | <a href="#">NM_052932.1</a> | KCT3                           |              |             |              |
| GI_16418432-S | 424.9  | 887.9  | 164.4  | HAK       | <a href="#">NM_052947.1</a> |                                | protein      |             | protein      |
| GI_16418442-S | 137.6  | 164.1  | 159.7  | DIRC1     | <a href="#">NM_052952.1</a> |                                |              |             |              |
| GI_16418446-S | 88     | 96.5   | 94.4   | CYYR1     | <a href="#">NM_052954.1</a> | C21orf95                       | molecular    | integral to | biological_  |
| GI_16418448-S | 108.9  | 111.1  | 112.9  | BUCS1     | <a href="#">NM_052956.1</a> | MACS1                          |              |             |              |
| GI_16418450-S | 97.6   | 108.1  | 91.4   | VEST1     | <a href="#">NM_052958.1</a> |                                |              |             |              |
| GI_16418454-S | 107.1  | 91.4   | 106.6  | RBP7      | <a href="#">NM_052960.1</a> | CRBP4;CRBPIV                   | lipid        |             | transport    |
| GI_16418460-S | 396.7  | 280.7  | 259.8  | TOP1MT    | <a href="#">NM_052963.1</a> |                                | DNA          | mitochond   | DNA          |
| GI_16418462-S | 98     | 96.6   | 102.8  | MAS1L     | <a href="#">NM_052967.1</a> | MRG;MAS-L;dJ994E9.2            | rhodopsin-   | integral to | G-protein    |
| GI_16418464-S | 111.3  | 98.7   | 100.9  | LEAP-2    | <a href="#">NM_052971.1</a> |                                |              |             | xenobiotic   |
| GI_16418466-S | 229.5  | 253.2  | 165.9  | LRG1      | <a href="#">NM_052972.1</a> | LRG                            | molecular    | membran     | biological_  |
| GI_16445028-S | 321.7  | 423.4  | 416    | IGSF8     | <a href="#">NM_052868.1</a> | EWI2;PGRL;CD81P3               |              |             |              |
| GI_16445034-S | 103    | 112    | 103.7  | TGM7      | <a href="#">NM_052955.1</a> | TGMZ                           | acyltransf   |             | peptide      |
| GI_16445349-A | 88.1   | 89.8   | 80.5   | TRIM15    | <a href="#">NM_052812.1</a> | RNF93;ZNFB7                    | zinc ion     | kinesin     |              |
| GI_16445351-I | 104.6  | 100.7  | 86.4   | TRIM31    | <a href="#">NM_007028.2</a> | RNF;HCG1;HCGI;C6orf13          |              |             |              |
| GI_16445353-A | 244.3  | 284.7  | 232.9  | TRIM31    | <a href="#">NM_052816.1</a> | RNF;HCG1;HCGI;C6orf13          |              |             |              |
| GI_16445355-S | 1315.3 | 1194.6 | 1222.7 | MGC19595  | <a href="#">NM_033415.2</a> | R30923_1                       |              |             |              |
| GI_16445392-S | 101.8  | 103.6  | 103.5  | CDH12     | <a href="#">NM_004061.2</a> | CDHB                           | calcium      | integral to | homophili    |
| GI_16445394-S | 91.4   | 88.7   | 88.2   | CDH18     | <a href="#">NM_004934.2</a> | CDH14;CDH24;CDH14L;EY-CADHERIN | calcium-     | integral to | homophili    |
| GI_16445399-A | 226.3  | 264.1  | 242.8  | DRD3      | <a href="#">NM_033660.1</a> | D3DR                           | dopamine     | integral to | dopamine     |
| GI_16445404-S | 106.5  | 107.6  | 100.2  | DRD1      | <a href="#">NM_000794.2</a> | DADR;DRD1A                     | dopamine     | cell [goid  | dopamine     |
| GI_16445406-S | 110.4  | 118    | 100.8  | KCNK9     | <a href="#">NM_016601.2</a> | KT3.2;TASK3;TASK-3             | voltage-     | integral to | potassium    |



|               |         |        |        |          |                             |                                     |              |              |              |
|---------------|---------|--------|--------|----------|-----------------------------|-------------------------------------|--------------|--------------|--------------|
| GI_16445407-I | 83.1    | 101.5  | 91.4   | MID2     | <a href="#">NM_012216.2</a> | FXY2;RNF60;TRIM1                    |              | microtubul   | embryoge     |
| GI_16445408-A | 157.2   | 166.8  | 168.1  | MID2     | <a href="#">NM_052817.1</a> | FXY2;RNF60;TRIM1                    |              | microtubul   | embryoge     |
| GI_16445410-A | 1262.8  | 1206.7 | 1143.9 | RFP2     | <a href="#">NM_005798.2</a> | CAR;LEU5;RNF77;TRIM13               | tumor        | kinesin      | embryoge     |
| GI_16445411-I | 222.5   | 279.4  | 269    | RFP2     | <a href="#">NM_052811.1</a> | CAR;LEU5;RNF77;TRIM13               | tumor        | kinesin      | embryoge     |
| GI_16445417-S | 454.4   | 486.8  | 512.7  | SCAMP2   | <a href="#">NM_005697.3</a> |                                     | protein      | integral to  | post-Golgi   |
| GI_16445418-I | 612.9   | 798.8  | 897.3  | SCAMP3   | <a href="#">NM_005698.2</a> | C1ORF3;PROPIN1;Propin 1             | protein      | integral to  | post-Golgi   |
| GI_16445420-A | 6006.6  | 6820.7 | 7793.8 | SCAMP3   | <a href="#">NM_052837.1</a> | C1ORF3;PROPIN1;Propin 1             | protein      | integral to  | post-Golgi   |
| GI_16445423-S | 1667.2  | 1363.3 | 1268.8 | WDR12    | <a href="#">NM_018256.2</a> | YTM1;FLJ10881;FLJ12719;FLJ12720     |              |              |              |
| GI_16445433-S | 850.7   | 774    | 668.9  | WDR8     | <a href="#">NM_017818.2</a> | FLJ20430                            |              |              |              |
| GI_16445440-S | 278.5   | 309    | 317.1  | TRIM26   | <a href="#">NM_003449.2</a> | AFP;RNF95;ZNF173                    | protein      | kinesin      |              |
| GI_16506284-S | 111.8   | 95.7   | 101.7  | NY-BR-1  | <a href="#">NM_052997.1</a> |                                     | aspartic-    | nucleus      | proteolysis  |
| GI_16506290-S | 156.8   | 174.1  | 157.1  | OSR2     | <a href="#">NM_053001.1</a> |                                     | electron     |              | electron     |
| GI_16506300-S | 4379.9  | 2583.7 | 1501.3 | TIGA1    | <a href="#">NM_053000.1</a> |                                     |              |              |              |
| GI_16506819-S | 1161.8  | 479.5  | 314.7  | C1orf17  | <a href="#">NM_015101.1</a> | KIAA0584                            |              |              | lipopolysa   |
| GI_16506825-A | 91.6    | 91.8   | 87.1   | SIGLECL1 | <a href="#">NM_033329.1</a> | S2V;SLG;FLJ38600                    | lectin [goid | integral to  | cell         |
| GI_16506825-I | 197.1   | 212.1  | 180.6  | SIGLECL1 | <a href="#">NM_033329.1</a> | S2V;SLG;FLJ38600                    | lectin [goid | integral to  | cell         |
| GI_16507197-S | 199.2   | 168.2  | 167.5  | ZNF291   | <a href="#">NM_020843.1</a> | MSTP063;KIAA1454                    |              |              |              |
| GI_16507203-S | 549.4   | 652.6  | 835    | UHRF1    | <a href="#">NM_013282.2</a> | Np95;ICBP90;RNF106;FLJ21925         | RNA          |              | regulation   |
| GI_16507207-S | 277     | 311.2  | 311.1  | CIC      | <a href="#">NM_015125.2</a> | KIAA0306                            | transporte   |              | transport    |
| GI_16507234-S | 101.6   | 109.4  | 100.1  | DNAH11   | <a href="#">NM_003777.1</a> | DNHBL;DPL11;DNAHBL;DNAHC11          | axonemal     | axonemal     | cell         |
| GI_16507949-S | 119.8   | 120.1  | 101.9  | TEKT2    | <a href="#">NM_014466.2</a> | h-tektin-t                          | structural   | kinesin      | microtubul   |
| GI_16507951-S | 109.8   | 159    | 124.8  | CARD11   | <a href="#">NM_032415.2</a> | BIMP3;CARMA1                        | apoptosis    | intracellula | intracellula |
| GI_16507953-I | 115.2   | 146.9  | 135.2  | CARD14   | <a href="#">NM_024110.2</a> | BIMP2;CARMA2                        | protein      | kinesin      | intracellula |
| GI_16507954-A | 96.5    | 113.5  | 92.4   | CARD14   | <a href="#">NM_052819.1</a> | BIMP2;CARMA2                        | protein      | kinesin      | intracellula |
| GI_16507954-I | 227.1   | 290.7  | 245.9  | CARD14   | <a href="#">NM_052819.1</a> | BIMP2;CARMA2                        | protein      | kinesin      | intracellula |
| GI_16507956-S | 615.5   | 626.9  | 645.8  | CDH13    | <a href="#">NM_001257.2</a> | CDHH                                | tumor        | membran      | cell         |
| GI_16507957-S | 287.7   | 458    | 320.5  | CDH15    | <a href="#">NM_004933.2</a> | CDH3;CDHM;MCAD;CDH14                | cell         | integral to  | cell         |
| GI_16507958-S | 112.1   | 116.8  | 113.7  | CDH16    | <a href="#">NM_004062.2</a> |                                     | calcium-     | integral to  | cell         |
| GI_16507959-S | 118.1   | 125.4  | 111.1  | CDH17    | <a href="#">NM_004063.2</a> | HPT1;CDH16;HPT-1                    | calcium-     | membran      | small        |
| GI_16507961-I | 254     | 326.9  | 275.9  | CDH23    | <a href="#">NM_022124.2</a> | USH1D;DFNB12;KIAA1774;KIAA1812;DKFZ |              |              |              |
| GI_16507963-A | 101.4   | 118.4  | 106.5  | CDH23    | <a href="#">NM_052836.1</a> | USH1D;DFNB12;KIAA1774;KIAA1812;DKFZ |              |              |              |
| GI_16507963-I | 106.1   | 113.8  | 114.1  | CDH23    | <a href="#">NM_052836.1</a> | USH1D;DFNB12;KIAA1774;KIAA1812;DKFZ |              |              |              |
| GI_16507965-S | 37301.6 | 36592  | 32032  | ENO1     | <a href="#">NM_001428.2</a> | NNE;PPH;MPB1;MBP-1;ENO1L1           | phosphop     |              | negative     |
| GI_16507966-S | 959.6   | 1085   | 544.1  | ENO2     | <a href="#">NM_001975.2</a> | NSE                                 | phosphop     | phosphop     | glycolysis   |
| GI_16507967-S | 88.9    | 104    | 103.2  | KCNK15   | <a href="#">NM_022358.2</a> | KT3.3;TASK5;KCNK11;KCNK14;TASK-     | voltage-     | integral to  | potassium    |
| GI_16507968-S | 22378.6 | 20595  | 15951  | RPL3     | <a href="#">NM_000967.2</a> | TARBP-B                             | structural   | cytosolic    | protein      |
| GI_16519560-I | 102     | 100.9  | 107.9  | TRIM10   | <a href="#">NM_052828.1</a> | RNF9;HERF1;RFB30                    | transcripti  | kinesin      | mesoderm     |
| GI_16519562-A | 183.8   | 218.4  | 188.8  | TRIM10   | <a href="#">NM_006778.2</a> | RNF9;HERF1;RFB30                    | transcripti  | kinesin      | mesoderm     |
| GI_16519562-I | 103.3   | 110    | 105.3  | TRIM10   | <a href="#">NM_006778.2</a> | RNF9;HERF1;RFB30                    | transcripti  | kinesin      | mesoderm     |
| GI_16519563-A | 108.6   | 105.7  | 106.6  | EEF1B2   | <a href="#">NM_021121.2</a> | EF1B;EEF1B;EEF1B1                   | translation  | eukaryotic   | translation  |
| GI_16519563-I | 1141.1  | 1653.6 | 1286.2 | EEF1B2   | <a href="#">NM_021121.2</a> | EF1B;EEF1B;EEF1B1                   | translation  | eukaryotic   | translation  |
| GI_16519564-I | 4033.9  | 4010   | 2827.5 | EEF1B2   | <a href="#">NM_001959.2</a> | EF1B;EEF1B;EEF1B1                   | translation  | eukaryotic   | translation  |
| GI_16554557-I | 81.8    | 88.8   | 85.6   | CARD9    | <a href="#">NM_022352.2</a> |                                     | apoptosis    | kinesin      | apoptosis    |
| GI_16554563-S | 156.3   | 181.9  | 173.7  | CARD6    | <a href="#">NM_032587.2</a> | CINCIN1                             | apoptosis    | intracellula | apoptosis    |

|               |         |        |        |          |                             |                                         |             |              |                   |
|---------------|---------|--------|--------|----------|-----------------------------|-----------------------------------------|-------------|--------------|-------------------|
| GI_16554565-I | 170.8   | 202.6  | 204.4  | CCNDBP1  | <a href="#">NM_012142.2</a> | DIP1;GCIP                               |             |              |                   |
| GI_16554567-A | 836.9   | 940.5  | 1267.4 | CCNDBP1  | <a href="#">NM_037370.1</a> | DIP1;GCIP                               |             |              |                   |
| GI_16554567-I | 246.3   | 323.5  | 274.4  | CCNDBP1  | <a href="#">NM_037370.1</a> | DIP1;GCIP                               |             |              |                   |
| GI_16554575-S | 1617    | 1439.2 | 1621.1 | CDC23    | <a href="#">NM_004661.2</a> | APC8                                    |             |              | anaphase- mitotic |
| GI_16554576-S | 678.3   | 960.6  | 833.5  | CDC27    | <a href="#">NM_001256.2</a> | APC3;HNUC;D0S1430E;D17S978E             |             |              | centrosom mitotic |
| GI_16554578-S | 1239.6  | 3212.5 | 814.4  | COL5A1   | <a href="#">NM_000093.2</a> |                                         | collagen    | collagen     | cell              |
| GI_16554580-S | 126.8   | 162.8  | 143.5  | COL5A2   | <a href="#">NM_000393.2</a> |                                         | extracellul | collagen     | cell growth       |
| GI_16554581-S | 314.4   | 556.7  | 344.3  | COL5A3   | <a href="#">NM_015719.2</a> |                                         | collagen    | collagen     | muscle            |
| GI_16554582-I | 261.7   | 302.9  | 278.4  | CORO2A   | <a href="#">NM_003389.2</a> | IR10;WDR2;CLIPINB                       | protein     | kinesin      | intracellula      |
| GI_16554586-I | 182.2   | 214.4  | 216.6  | CTDP1    | <a href="#">NM_004715.2</a> | FCP1                                    | DNA-        |              | transcripti       |
| GI_16554588-A | 826.3   | 1028.8 | 1200.2 | CTDP1    | <a href="#">NM_048368.1</a> | FCP1                                    | DNA-        |              | transcripti       |
| GI_16554591-A | 266.4   | 339.4  | 366.5  | ENO3     | <a href="#">NM_053013.1</a> | MSE                                     | phosphop    | phosphop     | glycolysis        |
| GI_16554595-A | 7315.9  | 12699  | 7627.7 | IER3     | <a href="#">NM_003897.2</a> | DIF2;IEX1;PRG1;DIF-2;GLY96;IEX-1;IEX-1L | apoptosis   |              | anti-             |
| GI_16554596-I | 115.6   | 170.3  | 121.6  | IER3     | <a href="#">NM_052815.1</a> | DIF2;IEX1;PRG1;DIF-2;GLY96;IEX-1;IEX-1L | apoptosis   |              | anti-             |
| GI_16554600-S | 585.5   | 675.9  | 585.6  | MRPS18A  | <a href="#">NM_018135.2</a> | S18bmt;FLJ10548;MRPS18-                 | structural  | ribosome     | protein           |
| GI_16554601-S | 6196    | 4356.4 | 4205.7 | MRPS18B  | <a href="#">NM_014046.2</a> | PTD017;S18amt;C6orf14;HSPC183;MRPS18-   | structural  | ribosome     | protein           |
| GI_16554602-S | 3105.1  | 3235.8 | 2904.8 | MRPS22   | <a href="#">NM_020191.2</a> | GIBT;GK002;C3orf5;RPMS22;MRP-S22        | structural  | mitochond    | biological_       |
| GI_16554603-S | 4014    | 4261.5 | 3841   | MRPS23   | <a href="#">NM_016070.2</a> | CGI-138;HSPC329;MRP-S23                 | structural  | mitochond    |                   |
| GI_16554605-S | 2011.8  | 2337.9 | 1586.6 | MRPS2    | <a href="#">NM_016034.2</a> | CGI-91;MRP-S2                           | structural  | small        | protein           |
| GI_16554606-S | 313.3   | 293.9  | 307.4  | MRPS10   | <a href="#">NM_018141.2</a> | MRP-S10;FLJ10567;PNAS-122               | structural  | mitochond    | protein           |
| GI_16554608-I | 438.6   | 553.8  | 534.5  | MRPS11   | <a href="#">NM_022839.2</a> | HCC-2;FLJ22512;FLJ23406                 | structural  | ribosome     | protein           |
| GI_16554610-S | 3472.3  | 3305.8 | 3287.3 | MRPS15   | <a href="#">NM_031280.2</a> | DC37;RPMS15;MPR-S15;FLJ11564            | structural  | ribosome     | protein           |
| GI_16554612-S | 1758.1  | 1767.2 | 1528.5 | MRPS16   | <a href="#">NM_016065.2</a> | RPMS16;CGI-132;MRP-S16;FLJ22062         | structural  | ribosome     | protein           |
| GI_16554613-S | 1328.4  | 1393   | 1429.7 | MRPS17   | <a href="#">NM_015969.2</a> | RPMS17;HSPC011;MRP-S17                  | structural  | ribosome     | protein           |
| GI_16554617-S | 1220.5  | 1406.1 | 1523.1 | MRPS7    | <a href="#">NM_015971.2</a> | MRP-S;RP-S7;RPMS7;MRP-S7                | structural  | ribosome     | protein           |
| GI_16554620-I | 233.4   | 264.3  | 241.8  | WDR10    | <a href="#">NM_052985.1</a> | SPG;WDR10p;WDR140;FLJ00025;FLJ10897     |             |              |                   |
| GI_16554624-A | 286.5   | 346.4  | 315.5  | WDR10    | <a href="#">NM_052990.1</a> | SPG;WDR10p;WDR140;FLJ00025;FLJ10897     |             |              |                   |
| GI_16554626-I | 654.4   | 632.6  | 672.5  | WDR5     | <a href="#">NM_017588.1</a> | BIG-3                                   | signal      | heterotrim   | G-protein         |
| GI_16579829-S | 102     | 99.4   | 94.1   | RPL39L   | <a href="#">NM_052969.1</a> | RPL39L1                                 | structural  | ribosome     | protein           |
| GI_16579882-S | 774.4   | 766.4  | 786.4  | MRPS28   | <a href="#">NM_014018.2</a> | MRPS35;HSPC007;MRP-S28;MRP-             | structural  | mitochond    | biological_       |
| GI_16579883-S | 81.3    | 82.7   | 75.1   | RPL3L    | <a href="#">NM_005061.2</a> |                                         | structural  | ribosome     | protein           |
| GI_16579884-S | 38186.1 | 34317  | 28489  | RPL4     | <a href="#">NM_000968.2</a> | HRPL4                                   | structural  | cytosolic    | protein           |
| GI_16579887-S | 144.3   | 148.2  | 130.3  | FBP1     | <a href="#">NM_000507.2</a> | FBP                                     | fructose-   |              | fructose          |
| GI_16579889-I | 144.2   | 146.3  | 132.2  | WDR7     | <a href="#">NM_015285.1</a> | TRAG;KIAA0541                           |             |              |                   |
| GI_16579891-A | 306.6   | 344    | 369.8  | WDR7     | <a href="#">NM_052834.1</a> | TRAG;KIAA0541                           |             |              |                   |
| GI_16596679-S | 110.9   | 118.6  | 107.1  | UGT2B28  | <a href="#">NM_053039.1</a> |                                         | glucurono   | microsom     | xenobiotic        |
| GI_16596683-S | 92.3    | 99.2   | 97.3   | MGC20460 | <a href="#">NM_053043.1</a> |                                         |             |              |                   |
| GI_16596685-S | 1664.7  | 1799.9 | 1769.9 | MGC14327 | <a href="#">NM_053045.1</a> | MGC15961                                |             |              |                   |
| GI_16596687-S | 307.1   | 385.3  | 436.7  | MGC16063 | <a href="#">NM_053047.1</a> |                                         |             |              |                   |
| GI_16604251-S | 680.1   | 712.8  | 558.3  | ZNF300   | <a href="#">NM_052860.1</a> |                                         | DNA         | nucleus      | regulation        |
| GI_16604255-S | 101.2   | 95.7   | 106.3  | PALM2    | <a href="#">NM_053016.1</a> |                                         |             |              |                   |
| GI_16604257-A | 775.7   | 614.8  | 583    | GPR74    | <a href="#">NM_053036.1</a> | NPFF2;NPGPR                             | G-protein   | integral to  | perception        |
| GI_16716338-S | 152     | 169.7  | 152.2  | PVRL4    | <a href="#">NM_030916.1</a> | LNIR;PRR4;nectin-4                      |             |              |                   |
| GI_16751832-S | 198.9   | 114.7  | 336.7  | COP      | <a href="#">NM_052889.1</a> |                                         | apoptosis   | intracellula | apoptosis         |

|               |         |        |        |          |                             |                                     |             |             |             |
|---------------|---------|--------|--------|----------|-----------------------------|-------------------------------------|-------------|-------------|-------------|
| GI_16751916-S | 77.4    | 91.9   | 89.4   | GPR102   | <a href="#">NM_053278.1</a> | TA5;TAR5;TRAR5                      | receptor    | integral to | G-protein   |
| GI_16751920-S | 106     | 109.2  | 92     | DCD      | <a href="#">NM_053283.1</a> | AIDD                                | antifungal  | extracellul | cell growth |
| GI_16751922-S | 103.6   | 95.2   | 95     | WFIKKN   | <a href="#">NM_053284.1</a> | RJD2                                |             |             |             |
| GI_16753201-S | 96.2    | 112.4  | 101    | KCNK16   | <a href="#">NM_032115.2</a> | TALK1;TALK-1                        | voltage-    | integral to | potassium   |
| GI_16753204-A | 330     | 497.2  | 392.9  | UBQLN1   | <a href="#">NM_053067.1</a> | DA41;DSK2;XDRP1;PLIC-1              |             |             |             |
| GI_16753206-S | 991.8   | 1081.6 | 1097.7 | UBQLN2   | <a href="#">NM_013444.2</a> | Dsk2;CHAP1;LIC-2;N4BP4;PLIC2;PLIC-  |             |             |             |
| GI_16753208-S | 212.9   | 300.4  | 325.7  | UBQLN3   | <a href="#">NM_017481.2</a> |                                     |             |             | ubiquitin   |
| GI_16753209-S | 131.9   | 96.4   | 88.9   | SCAP1    | <a href="#">NM_003726.2</a> | SKAP55                              | protein-    |             | signal      |
| GI_16753213-S | 24212.6 | 28701  | 26105  | PFN1     | <a href="#">NM_005022.2</a> |                                     | actin       | actin       | cytoskelet  |
| GI_16753214-I | 120.8   | 162.8  | 162.7  | PFN2     | <a href="#">NM_053024.1</a> | PFL;D3S1319E                        | actin       | actin       | regulation  |
| GI_16753216-A | 4900.3  | 5450.8 | 4222.5 | PFN2     | <a href="#">NM_002628.2</a> | PFL;D3S1319E                        | actin       | actin       | regulation  |
| GI_16753217-S | 156.9   | 168.8  | 176.4  | PURA     | <a href="#">NM_005859.2</a> | PUR1;PURALPHA;PUR-ALPHA             | single-     | nucleus     | DNA         |
| GI_16753219-S | 130.1   | 135.3  | 129.5  | ADAMDEC1 | <a href="#">NM_014479.2</a> | M12.219                             | integrin    | integral to | negative    |
| GI_16753220-S | 107.3   | 104.5  | 96.7   | CDH22    | <a href="#">NM_021248.1</a> | C20orf25;dJ998H6.1                  | calcium     | integral to | homophili   |
| GI_16753224-S | 12653.6 | 12107  | 9663   | RPL14    | <a href="#">NM_003973.2</a> | L14;RL14;hRL14;CTG-B33;CAG-ISL-7    | structural  | cytosolic   | protein     |
| GI_16753226-S | 17520.3 | 16433  | 12412  | RPL6     | <a href="#">NM_000970.2</a> | TAXREB107                           | structural  | cytosolic   | regulation  |
| GI_16753228-S | 481.2   | 392.5  | 556.4  | PAG      | <a href="#">NM_018440.2</a> |                                     | transmem    | integral to | signal      |
| GI_16753230-S | 121.1   | 131.5  | 118.6  | TEKT1    | <a href="#">NM_053285.1</a> |                                     | structural  | kinesin     | microtubul  |
| GI_16753232-S | 425.3   | 566.5  | 489.7  | TLN1     | <a href="#">NM_006289.2</a> | TLN;KIAA1027                        |             |             |             |
| GI_16757969-I | 2345.4  | 796.2  | 1008.1 | C1orf24  | <a href="#">NM_052966.1</a> | NIBAN                               | molecular   | cellular_co | biological_ |
| GI_16876434-S | 124.7   | 122.8  | 119.5  | GPR101   | <a href="#">NM_054021.1</a> | GPCR6                               | receptor    | integral to | G-protein   |
| GI_16876446-S | 106.7   | 109.9  | 104.8  | AMAC     | <a href="#">NM_054028.1</a> |                                     |             | membran     |             |
| GI_16876448-S | 112     | 113.7  | 99.7   | C8orf14  | <a href="#">NM_054029.1</a> | VIR35                               |             |             |             |
| GI_16876452-S | 110     | 111.5  | 104.4  | MRGX3    | <a href="#">NM_054031.1</a> |                                     | receptor    | integral to | G-protein   |
| GI_16876454-S | 132.5   | 151.9  | 136.5  | MRGX4    | <a href="#">NM_054032.1</a> |                                     | receptor    | integral to | G-protein   |
| GI_16904380-S | 842.7   | 880.8  | 746.7  | LRBA     | <a href="#">NM_006726.1</a> | BGL;LBA;CDC4L;LAB300                | molecular   | cellular_co | biological_ |
| GI_16904382-S | 95      | 102.4  | 93.8   | KIAA1365 | <a href="#">NM_020794.1</a> |                                     |             |             |             |
| GI_16904386-S | 177.8   | 318.2  | 115.6  | PCOLCE2  | <a href="#">NM_013363.2</a> | PCPE2                               | ATP         | membran     | transport   |
| GI_16905072-S | 484.4   | 373.8  | 450.1  | FKSG14   | <a href="#">NM_022145.2</a> | P33;Solt;AF5alpha                   |             |             |             |
| GI_16905366-S | 86.4    | 96.4   | 86     | HRLP5    | <a href="#">NM_054108.1</a> |                                     |             |             |             |
| GI_16905370-S | 83.9    | 99.6   | 90.4   | IHPK3    | <a href="#">NM_054111.1</a> | IP6K3;INSP6K3                       | inositol-   |             |             |
| GI_16905372-S | 242.2   | 287    | 271.3  | DEFB118  | <a href="#">NM_054112.1</a> | ESC42;DEFB-18;C20orf63;dJ1018D12.3  | antibacteri | perinuclea  | xenobiotic  |
| GI_16905502-A | 1140.5  | 1626.6 | 1016.1 | SEC23B   | <a href="#">NM_032985.2</a> |                                     | protein     | membran     | vesicle-    |
| GI_16905503-I | 117     | 116.5  | 108.7  | SEC23B   | <a href="#">NM_032986.2</a> |                                     | protein     | membran     | vesicle-    |
| GI_16905508-A | 150.1   | 109.3  | 108.4  | B3GAT1   | <a href="#">NM_018644.2</a> | HNK-1;GLCATP;GlcAT-P                | glucurono   | integral to | protein     |
| GI_16905509-I | 922.2   | 1006.6 | 854.1  | B3GAT1   | <a href="#">NM_054025.1</a> | HNK-1;GLCATP;GlcAT-P                | glucurono   | integral to | protein     |
| GI_16905511-S | 34088.1 | 30799  | 25677  | RPLP1    | <a href="#">NM_001003.2</a> | P1;RPP1                             | structural  | cytosolic   | protein     |
| GI_16905512-S | 14576.7 | 12460  | 10690  | RPLP2    | <a href="#">NM_001004.2</a> | P2;RPP2                             | structural  | cytosolic   | protein     |
| GI_16905513-S | 709.9   | 778.6  | 603.3  | RDX      | <a href="#">NM_002906.2</a> |                                     | actin       | actin       | cytoskelet  |
| GI_16905514-S | 1041.8  | 1268.1 | 1148.5 | RFX5     | <a href="#">NM_000449.2</a> |                                     | DNA         | nucleus     | transcripti |
| GI_16905515-A | 800.4   | 957.8  | 838.6  | FUSIP1   | <a href="#">NM_006625.3</a> | NSSR;TASR;SRp38;TASR1;TASR2;FUSIP2; | pre-mRNA    | nucleus     | mRNA        |
| GI_16905515-I | 974.7   | 1107.7 | 1015   | FUSIP1   | <a href="#">NM_006625.3</a> | NSSR;TASR;SRp38;TASR1;TASR2;FUSIP2; | pre-mRNA    | nucleus     | mRNA        |
| GI_16905516-I | 390.5   | 496.1  | 422.6  | FUSIP1   | <a href="#">NM_054016.1</a> | NSSR;TASR;SRp38;TASR1;TASR2;FUSIP2; | pre-mRNA    | nucleus     | mRNA        |
| GI_16905519-I | 376.8   | 455.7  | 397.1  | GOSR2    | <a href="#">NM_054022.1</a> | GS27;MEMBRIN                        | v-SNARE     | ER-Golgi    | membran     |

|               |         |        |        |         |                             |                                   |             |             |             |
|---------------|---------|--------|--------|---------|-----------------------------|-----------------------------------|-------------|-------------|-------------|
| GI_16905521-A | 318.9   | 380.2  | 311.9  | GOSR2   | <a href="#">NM_004287.2</a> | GS27;MEMBRIN                      | v-SNARE     | ER-Golgi    | membran     |
| GI_16905521-I | 380.2   | 509.2  | 430.1  | GOSR2   | <a href="#">NM_004287.2</a> | GS27;MEMBRIN                      | v-SNARE     | ER-Golgi    | membran     |
| GI_16905523-S | 132.6   | 143.2  | 126.2  | CES1    | <a href="#">NM_001266.3</a> | CEH;CES2;HMSE;SES1;HMSE1          | serine      | endoplas    | response    |
| GI_16905527-A | 3777.5  | 3654.8 | 2895.3 | DAP3    | <a href="#">NM_004632.2</a> | DAP-3;MRPS29;MRP-S29;bMRP-10      | structural  | mitochond   | induction   |
| GI_16915927-A | 144.6   | 123.5  | 140.5  | CPB2    | <a href="#">NM_016413.2</a> | CPU;PCPB;TAFI                     | lysine      | extracellul | proteolysis |
| GI_16915931-I | 86.3    | 85.5   | 95.2   | CPB2    | <a href="#">NM_001872.2</a> | CPU;PCPB;TAFI                     | lysine      | extracellul | proteolysis |
| GI_16915933-A | 10176.1 | 7362.7 | 9512.5 | MGAT4B  | <a href="#">NM_014275.2</a> | GNT-IV;GnT-Ivb                    | alpha-1,3-  |             | N-glycan    |
| GI_16915933-I | 573.7   | 730.9  | 690.7  | MGAT4B  | <a href="#">NM_014275.2</a> | GNT-IV;GnT-Ivb                    | alpha-1,3-  |             | N-glycan    |
| GI_16915935-I | 122.4   | 127.1  | 120.7  | MGAT4B  | <a href="#">NM_054013.1</a> | GNT-IV;GnT-Ivb                    | alpha-1,3-  |             | N-glycan    |
| GI_16933524-S | 114.5   | 116.5  | 111.3  | UNC5C   | <a href="#">NM_003728.2</a> | UNC5H3                            | netrin      |             | brain       |
| GI_16933527-I | 93.2    | 103.8  | 89.5   | CYP26A1 | <a href="#">NM_057157.1</a> | CP26;CYP26;P450RAI;P450RAI1       | retinoic    | membran     | metabolis   |
| GI_16933529-A | 144.2   | 158.4  | 160.6  | CYP26A1 | <a href="#">NM_000783.2</a> | CP26;CYP26;P450RAI;P450RAI1       | retinoic    | membran     | metabolis   |
| GI_16933529-I | 195.3   | 229.4  | 224.6  | CYP26A1 | <a href="#">NM_000783.2</a> | CP26;CYP26;P450RAI;P450RAI1       | retinoic    | membran     | metabolis   |
| GI_16933536-I | 112.9   | 124    | 114.1  | GLMN    | <a href="#">NM_053274.1</a> | GVM;GLML;FAB68;FAP48;FKBPAP;VMGLO | receptor    |             | protein     |
| GI_16933538-A | 546.8   | 576.8  | 592.7  | GLMN    | <a href="#">NM_007070.2</a> | GVM;GLML;FAB68;FAP48;FKBPAP;VMGLO | receptor    |             | protein     |
| GI_16933539-S | 226.5   | 284.8  | 256.6  | FAP     | <a href="#">NM_004460.2</a> | FAPA;DPPIV;SEPRASE                | dipeptidyl- | integral to | cell-cell   |
| GI_16933541-I | 18812.7 | 32210  | 11550  | FN1     | <a href="#">NM_002026.1</a> | FN;CIG;FINC;LETS                  | cell        | extracellul | cell        |
| GI_16933543-A | 412.8   | 830.1  | 315.2  | FN1     | <a href="#">NM_054034.1</a> | FN;CIG;FINC;LETS                  | cell        | extracellul | cell        |
| GI_16933543-I | 289.8   | 583.7  | 192.4  | FN1     | <a href="#">NM_054034.1</a> | FN;CIG;FINC;LETS                  | cell        | extracellul | cell        |
| GI_16933547-A | 25026.1 | 22062  | 18943  | RPLP0   | <a href="#">NM_001002.2</a> | P0;L10E;RPP0;PRLP0                | structural  | cytosolic   | protein     |
| GI_16933548-A | 142.6   | 179.8  | 190.2  | MFI2    | <a href="#">NM_033316.2</a> | MTF1;MAP97;MGC4856                | iron ion    | extracellul | iron ion    |
| GI_16933548-I | 425.8   | 825.4  | 1012.3 | MFI2    | <a href="#">NM_033316.2</a> | MTF1;MAP97;MGC4856                | iron ion    | extracellul | iron ion    |
| GI_16933549-I | 119.4   | 129.8  | 115.6  | MFI2    | <a href="#">NM_005929.3</a> | MTF1;MAP97;MGC4856                | iron ion    | extracellul | iron ion    |
| GI_16933550-A | 524.3   | 913.5  | 575.5  | ANTXR1  | <a href="#">NM_053034.1</a> | ATR;TEM8;FLJ10601;FLJ21776        | receptor    | integral to |             |
| GI_16933550-I | 91.7    | 103    | 87.7   | ANTXR1  | <a href="#">NM_053034.1</a> | ATR;TEM8;FLJ10601;FLJ21776        | receptor    | integral to |             |
| GI_16933552-I | 1312.7  | 2253.1 | 1254.6 | ANTXR1  | <a href="#">NM_018153.2</a> | ATR;TEM8;FLJ10601;FLJ21776        | receptor    | integral to |             |
| GI_16933554-S | 96.4    | 103    | 99.1   | PCDH15  | <a href="#">NM_033056.2</a> | USH1F                             | calcium     | integral to | hearing     |
| GI_16933556-S | 127.6   | 113.3  | 108.6  | PCDH16  | <a href="#">NM_003737.1</a> | FIB1;CDH25;FLJ11790;KIAA1773      | calcium-    | integral to | cell        |
| GI_16933558-S | 149.8   | 157.9  | 145.2  | PC-LKC  | <a href="#">NM_017675.2</a> | FLJ20124;FLJ20383                 | calcium     | membran     | homophili   |
| GI_16933560-S | 79.6    | 99.9   | 89     | SSPN    | <a href="#">NM_005086.3</a> | KRAG;SPN1;SPN2                    | DNA         | dystrophin- | muscle      |
| GI_16933562-S | 4881.1  | 5270   | 4660.9 | TCEB1   | <a href="#">NM_005648.2</a> | SIII                              | protein     | nucleus     | regulation  |
| GI_16933563-I | 273.7   | 350.5  | 387.4  | DNM1L   | <a href="#">NM_012062.2</a> | DLP1;DRP1;DVLP;VPS1;DYMPLE;HDYNIV | GTPase      | Golgi cis-  | mitochond   |
| GI_16933564-S | 113.8   | 120.6  | 124.6  | PCDH21  | <a href="#">NM_033100.1</a> | KIAA1775;DKFZp434A132             | calcium     | membran     | homophili   |
| GI_16936519-S | 142.8   | 202.6  | 179.3  | WNT10A  | <a href="#">NM_025216.2</a> | FLJ14301                          | signal      | extracellul | developm    |
| GI_16936521-S | 186.1   | 196.9  | 170.6  | WNT10B  | <a href="#">NM_003394.2</a> | WNT-12                            | signal      | extracellul | oncogene    |
| GI_16936523-S | 191.5   | 220    | 189.8  | WNT1    | <a href="#">NM_005430.2</a> | INT1                              | signal      | soluble     | central     |
| GI_16936525-S | 94.7    | 118.5  | 103.5  | WNT6    | <a href="#">NM_006522.2</a> |                                   | extracellul | extracellul | developm    |
| GI_16936527-I | 225.6   | 260.8  | 201.3  | CDK2    | <a href="#">NM_001798.2</a> | p33(CDK2)                         | cyclin-     | cytoplasm   | regulation  |
| GI_16936529-A | 785.9   | 1105.9 | 866.8  | CDK2    | <a href="#">NM_052827.1</a> | p33(CDK2)                         | cyclin-     | cytoplasm   | regulation  |
| GI_16936531-I | 3559.9  | 3195.6 | 3176.5 | CDK4    | <a href="#">NM_000075.2</a> | CMM3;PSK-J3;MGC14458              | cyclin-     |             | G1/S        |
| GI_16936532-A | 6282.1  | 5421.8 | 5388   | CDK4    | <a href="#">NM_052984.1</a> | CMM3;PSK-J3;MGC14458              | cyclin-     |             | G1/S        |
| GI_16936534-I | 177.9   | 190    | 186.2  | UNC119  | <a href="#">NM_054035.1</a> | HRG4                              |             | cytosol     | phototrans  |
| GI_16936537-A | 680.4   | 717.4  | 617.7  | UNC119  | <a href="#">NM_005148.2</a> | HRG4                              |             | cytosol     | phototrans  |
| GI_16936539-I | 130.2   | 132.1  | 108.9  | CRYBA2  | <a href="#">NM_057093.1</a> |                                   | structural  | cellular_co | biological_ |

|               |         |        |        |         |                             |                                    |             |             |             |
|---------------|---------|--------|--------|---------|-----------------------------|------------------------------------|-------------|-------------|-------------|
| GI_16945965-S | 127.3   | 132.8  | 146.3  | CENTB5  | <a href="#">NM_030649.1</a> | KIAA1716                           |             |             |             |
| GI_16945967-S | 131.8   | 157.5  | 151.2  | TMEM10  | <a href="#">NM_033207.2</a> | TMP10;HTMP10                       |             | integral to |             |
| GI_16945968-S | 153.4   | 112    | 98.1   | LRP15   | <a href="#">NM_052953.2</a> |                                    |             |             |             |
| GI_16945969-A | 96.1    | 105.5  | 97.5   | PSIP1   | <a href="#">NM_021144.2</a> | p52;p75;PAIP;DFS70;LEDGF;PSIP2     | DNA         | nucleus     | regulation  |
| GI_16945969-I | 1159.5  | 1106   | 1159.3 | PSIP1   | <a href="#">NM_021144.2</a> | p52;p75;PAIP;DFS70;LEDGF;PSIP2     | DNA         | nucleus     | regulation  |
| GI_16950590-A | 2472.1  | 2590.7 | 2736.3 | MRPS12  | <a href="#">NM_033363.1</a> | RPS12;RPMS12;RPSM12;MPR-S12;MT-    | structural  | mitochond   | protein     |
| GI_16950592-I | 1015    | 1183.8 | 904.3  | MRPS21  | <a href="#">NM_018997.1</a> | MDS016;RPMS21;MRP-S21              |             |             |             |
| GI_16950596-A | 1859.6  | 2237.1 | 1808.2 | MRPS33  | <a href="#">NM_053035.1</a> | PTD003;CGI-139;MRP-S33;FLJ21123    | structural  | mitochond   | protein     |
| GI_16950598-S | 1739.2  | 1738.8 | 1673.6 | MRPS30  | <a href="#">NM_016640.2</a> | PAP;PDCD9;MRP-S30;DKFZp566B2024    |             |             | apoptosis   |
| GI_16950599-S | 1468.8  | 1164.5 | 1280.8 | MRPS31  | <a href="#">NM_005830.2</a> | IMOGN38;MRP-S31                    | structural  | mitochond   | regulation  |
| GI_16950602-S | 1607.6  | 1357.7 | 1442.2 | MRPS35  | <a href="#">NM_021821.2</a> | MDS023;MRPS28;MRP-                 |             |             |             |
| GI_16950606-S | 2836.4  | 3816.6 | 3271.6 | MRPL51  | <a href="#">NM_016497.2</a> | CDA09;MRP64;bMRP64;HSPC241         | structural  | mitochond   |             |
| GI_16950608-S | 2004.2  | 2359.3 | 2037.8 | MRPS27  | <a href="#">NM_015084.1</a> | MRP-S27;FLJ21764;FLJ23348;KIAA0264 | structural  | mitochond   |             |
| GI_16950622-A | 450.4   | 422.9  | 212.4  | MYLK    | <a href="#">NM_053031.1</a> | KRP;MLCK;MLCK108;MLCK210;FLJ12216  | myosin-     |             | protein     |
| GI_16950626-A | 755.2   | 695.8  | 852.5  | AP1S1   | <a href="#">NM_001283.2</a> | AP19;CLAPS1;SIGMA1A                | vesicle     | coated      | nonselecti  |
| GI_16950626-I | 834.8   | 718.8  | 916.1  | AP1S1   | <a href="#">NM_001283.2</a> | AP19;CLAPS1;SIGMA1A                | vesicle     | coated      | nonselecti  |
| GI_16950627-I | 2064.5  | 1857   | 2320.8 | AP1S1   | <a href="#">NM_057089.1</a> | AP19;CLAPS1;SIGMA1A                | vesicle     | coated      | nonselecti  |
| GI_16950629-A | 94.5    | 94.9   | 92.2   | AQP6    | <a href="#">NM_001652.2</a> | AQP2L                              | water       | integral to | small       |
| GI_16950630-I | 103.1   | 112.4  | 98.5   | AQP6    | <a href="#">NM_053286.1</a> | AQP2L                              | water       | integral to | small       |
| GI_16950632-I | 131.8   | 152.5  | 123.6  | ASS     | <a href="#">NM_054012.1</a> | ASS1;CTLN1                         | ligase      | cytoplasm   | urea cycle  |
| GI_16950634-A | 368.7   | 557.3  | 357.1  | ASS     | <a href="#">NM_000050.2</a> | ASS1;CTLN1                         | ligase      | cytoplasm   | urea cycle  |
| GI_16950639-I | 154.9   | 160.9  | 157.6  | ARTN    | <a href="#">NM_003976.2</a> | EVN;NBN                            | receptor    |             | neuroblast  |
| GI_16950642-I | 117     | 122.4  | 111.7  | ARTN    | <a href="#">NM_057091.1</a> | EVN;NBN                            | receptor    |             | neuroblast  |
| GI_16950644-A | 123.7   | 122.7  | 104.2  | ARTN    | <a href="#">NM_057160.1</a> | EVN;NBN                            | receptor    |             | neuroblast  |
| GI_16950644-I | 150.1   | 188.1  | 163.8  | ARTN    | <a href="#">NM_057160.1</a> | EVN;NBN                            | receptor    |             | neuroblast  |
| GI_16950653-S | 451.6   | 518.7  | 582.4  | CCNA2   | <a href="#">NM_001237.2</a> | CCN1;CCNA                          | cyclin-     | nucleus     | mitotic G2  |
| GI_16950654-S | 5100.4  | 3382.9 | 4106   | CCND1   | <a href="#">NM_053056.1</a> | BCL1;PRAD1;U21B31;D11S287E         | cyclin-     | nucleus     | G1/S        |
| GI_16950656-S | 168     | 390.4  | 125.8  | CCND2   | <a href="#">NM_001759.2</a> | KIAK0002                           | cyclin-     | nucleus     | regulation  |
| GI_16950657-S | 418.8   | 791.5  | 856.7  | CCND3   | <a href="#">NM_001760.2</a> |                                    | cyclin-     | nucleus     | regulation  |
| GI_16950659-S | 2312.3  | 2293.3 | 2204.3 | CDK7    | <a href="#">NM_001799.2</a> | CAK1;STK1;CDKN7;p39MO15            | cyclin-     | nucleus     | transcripti |
| GI_16975495-S | 130.5   | 150.8  | 139.2  | CORTBP2 | <a href="#">NM_033427.1</a> | Orf4;C7orf8;KIAA1758               |             |             |             |
| GI_17017962-A | 134.8   | 149    | 133.5  | FOXP2   | <a href="#">NM_014491.1</a> | SPCH1;CAGH44;TNRC10                | transcripti |             | neurogene   |
| GI_17017969-S | 28477.9 | 27546  | 22845  | RPL24   | <a href="#">NM_000986.2</a> |                                    | structural  | cytosolic   | protein     |
| GI_17017970-S | 19230.9 | 17915  | 13855  | RPL26   | <a href="#">NM_000987.2</a> |                                    | structural  | cytosolic   | protein     |
| GI_17017971-S | 2931.3  | 3720.6 | 3261.7 | RPL26L1 | <a href="#">NM_016093.2</a> | RPL26P1                            | structural  | large       | protein     |
| GI_17017972-S | 25182   | 23581  | 19157  | RPL27   | <a href="#">NM_000988.2</a> |                                    | structural  | ribosome    | protein     |
| GI_17017973-S | 136.2   | 139.8  | 130.7  | WNT11   | <a href="#">NM_004626.2</a> | HWNT11                             |             |             | embryoge    |
| GI_17017975-S | 112.6   | 113    | 111.6  | WNT9B   | <a href="#">NM_003396.1</a> | WNT15;WNT14B                       | extracellul | extracellul | signal      |
| GI_17017978-S | 176.8   | 230.2  | 171.3  | WNT3A   | <a href="#">NM_033131.2</a> |                                    | extracellul | extracellul | morphoge    |
| GI_17017979-A | 320.9   | 441    | 339.8  | KLHL4   | <a href="#">NM_057162.1</a> | KHL4;DKELCHL;KIAA1687              | actin       | cytoskelet  | actin       |
| GI_17017983-S | 1200.3  | 1293.2 | 1373.7 | CDK9    | <a href="#">NM_001261.2</a> | TAK;C-2k;CDC2L4;PITALRE            | cyclin-     | transcripti | RNA         |
| GI_17017984-S | 237.6   | 304    | 220.6  | CDKL3   | <a href="#">NM_016508.2</a> | NKIAMRE                            | protein     |             | protein     |
| GI_17017985-S | 10164.2 | 9689.7 | 8065   | COX4I1  | <a href="#">NM_001861.2</a> | COX4;COXIV                         | cytochrom   | mitochond   | energy      |
| GI_17017986-S | 6735.9  | 5503.4 | 5324.2 | COX5A   | <a href="#">NM_004255.2</a> | VA;COX;COX-VA                      | cytochrom   | inner       | electron    |

|               |         |        |        |           |                             |                                     |             |             |              |
|---------------|---------|--------|--------|-----------|-----------------------------|-------------------------------------|-------------|-------------|--------------|
| GI_17017987-S | 5236.1  | 5941.1 | 5517.9 | COX5B     | <a href="#">NM_001862.2</a> | COXVB                               | cytochrom   | mitochond   | respiratory  |
| GI_17017990-S | 991.8   | 1087.5 | 976.3  | FTSJ3     | <a href="#">NM_017647.2</a> | EPCS3;FLJ20062                      |             |             |              |
| GI_17017992-S | 174.3   | 170    | 152.8  | STK22C    | <a href="#">NM_052841.2</a> | TSSK3;SPOGA3;STK22D                 | ATP         |             | protein      |
| GI_17025229-S | 104.7   | 117.7  | 100.3  | KCNK17    | <a href="#">NM_031460.2</a> | TALK2;TASK4;TALK-2;TASK-4           | voltage-    | integral to | potassium    |
| GI_17025233-S | 150.5   | 185.8  | 160.2  | KEL       | <a href="#">NM_000420.2</a> |                                     | endopepti   | cytoskelet  | N-linked     |
| GI_17105380-S | 119.7   | 108.7  | 95.5   | CLIC2     | <a href="#">NM_001289.3</a> | XAP121                              | chloride    | membran     | small        |
| GI_17105393-S | 32163.9 | 32673  | 28057  | RPL23A    | <a href="#">NM_000984.2</a> | MDA20                               | structural  | cytosolic   | protein      |
| GI_17105395-S | 14680.7 | 13233  | 11218  | RPL29     | <a href="#">NM_000992.2</a> | HIP;HUMRPL29                        | heparin     | cytosolic   | embryo       |
| GI_17105396-I | 422.4   | 410.1  | 388.9  | RFP       | <a href="#">NM_006510.3</a> | RNF76;TRIM27                        | nucleic     | membran     | spermatog    |
| GI_17105397-I | 1119.9  | 1286.7 | 859.5  | WDR1      | <a href="#">NM_017491.2</a> | NORI-1                              | protein     | cytoskelet  | hearing      |
| GI_17105398-A | 5886.1  | 5796.6 | 4414.1 | WDR1      | <a href="#">NM_005112.3</a> | NORI-1                              | protein     | cytoskelet  | hearing      |
| GI_17105399-I | 113.9   | 148.1  | 131.8  | PIK4CA    | <a href="#">NM_058004.1</a> | pi4K230;PI4K-ALPHA                  | 1-          | Golgi       | phosphati    |
| GI_17105401-I | 104.3   | 152.7  | 91     | FEZ1      | <a href="#">NM_022549.2</a> |                                     |             | kinesin     | axon         |
| GI_17105402-A | 133.1   | 229.2  | 134.3  | FEZ1      | <a href="#">NM_005103.3</a> |                                     |             | kinesin     | axon         |
| GI_17105402-I | 115.7   | 714.8  | 97.4   | FEZ1      | <a href="#">NM_005103.3</a> |                                     |             | kinesin     | axon         |
| GI_17136074-S | 921.2   | 804.4  | 836    | AXUD1     | <a href="#">NM_033027.2</a> | URAX1;TAIP-3;DKFZp566F164           |             | nucleus     | apoptosis    |
| GI_17136075-I | 225.4   | 264    | 220    | KLHL4     | <a href="#">NM_019117.3</a> | KHL4;DKELCHL;KIAA1687               | actin       | cytoskelet  | actin        |
| GI_17136076-S | 181.3   | 262.6  | 123.4  | MYLK2     | <a href="#">NM_033118.2</a> | KMLC;MLCK;skMLCK                    | myosin-     |             | protein      |
| GI_17136077-S | 120.9   | 94.9   | 116.5  | VGF       | <a href="#">NM_003378.2</a> |                                     | growth      | cellular_co | biological_  |
| GI_17136079-I | 235.6   | 290.9  | 303.2  | PEX16     | <a href="#">NM_057174.1</a> |                                     |             | integral to | peroxisom    |
| GI_17136146-S | 162.8   | 198    | 100.4  | ADORA2A   | <a href="#">NM_000675.3</a> | RDC8;hA2aR;ADORA2                   | adenosine   | membran     | phagocyto    |
| GI_17136150-S | 863.6   | 943.4  | 935.9  | ZW10      | <a href="#">NM_004724.2</a> | HZW10                               | centromeri  | kinetochor  | centromer    |
| GI_17149810-A | 9705.6  | 12136  | 6524   | COL6A3    | <a href="#">NM_057167.1</a> |                                     | collagen    | microfibril | muscle       |
| GI_17149812-S | 3362.8  | 4226.9 | 3525.7 | KLHDC3    | <a href="#">NM_057161.2</a> | PEAS;HPEAS;dJ20C7.3                 |             |             |              |
| GI_17149826-A | 535.2   | 456    | 409.6  | TBDN100   | <a href="#">NM_025085.2</a> | Ga19;NATH;FLJ13340                  |             |             |              |
| GI_17149833-S | 149.5   | 151.6  | 132.2  | SORT1     | <a href="#">NM_002959.3</a> | NT3;Gp95                            | transmem    | Golgi       | nonselecti   |
| GI_17149835-A | 2422.9  | 2755.6 | 993.5  | FKBP1A    | <a href="#">NM_054014.1</a> | FKBP1;PKC12;PKCI2;FKBP12;PPIASE;FKB | receptor    | nucleus     | protein      |
| GI_17149835-I | 849.7   | 1026.4 | 379.1  | FKBP1A    | <a href="#">NM_054014.1</a> | FKBP1;PKC12;PKCI2;FKBP12;PPIASE;FKB | receptor    | nucleus     | protein      |
| GI_17149837-I | 5859.2  | 7257.2 | 3037   | FKBP1A    | <a href="#">NM_000801.2</a> | FKBP1;PKC12;PKCI2;FKBP12;PPIASE;FKB | receptor    | nucleus     | protein      |
| GI_17149840-A | 158     | 187.7  | 167.2  | FKBP1B    | <a href="#">NM_004116.2</a> | OTK4;FKBP9;FKBP1L;PKBP1L;PPIase;FKB | cyclophilin | cytoplasm   | muscle       |
| GI_17149841-I | 102.3   | 110.9  | 114.4  | FKBP2     | <a href="#">NM_004470.2</a> | PPIase;FKBP-13                      | FK506       | endoplas    | protein      |
| GI_17149843-A | 195.7   | 250.9  | 213.1  | FKBP2     | <a href="#">NM_057092.1</a> | PPIase;FKBP-13                      | FK506       | endoplas    | protein      |
| GI_17149843-I | 341.5   | 438.1  | 357.2  | FKBP2     | <a href="#">NM_057092.1</a> | PPIase;FKBP-13                      | FK506       | endoplas    | protein      |
| GI_17149845-S | 1536.4  | 1662   | 2003.1 | FKBP3     | <a href="#">NM_002013.2</a> | PPIase;FKBP-25                      | receptor    | nucleus     | protein      |
| GI_17149846-S | 1295    | 1328.4 | 1415.5 | FKBP4     | <a href="#">NM_002014.2</a> | HBI;p52;Hsp56;FKBP52;FKBP59;PPIase  | Hsp70/Hs    | nucleus     | protein      |
| GI_17149847-S | 409.1   | 409.7  | 256.3  | FKBP5     | <a href="#">NM_004117.2</a> | P54;FKBP51;FKBP54;PPIase;Ptg-10     | peptidyl-   | nucleus     | protein      |
| GI_17149848-S | 112.1   | 114.4  | 105.5  | FKBP6     | <a href="#">NM_003602.2</a> | FKBP36;PPIase                       | peptidyl-   |             | protein      |
| GI_17149850-S | 222     | 242.7  | 253.8  | FKBP8     | <a href="#">NM_012181.2</a> | FKBP38;FKBPr38                      |             |             | intracellula |
| GI_17157994-S | 104.3   | 102.2  | 92.7   | DGAT2L1   | <a href="#">NM_058165.1</a> | MGAT1;DGAT2L                        | acyltransf  |             |              |
| GI_17158002-S | 1701.6  | 1689.8 | 1536.8 | ANTXR2    | <a href="#">NM_058172.1</a> | ISH;JHF;CMG2;CMG-2;FLJ31074         |             |             |              |
| GI_17158004-S | 171.2   | 197.4  | 180.5  | LOC118430 | <a href="#">NM_058173.1</a> |                                     |             |             |              |
| GI_17158012-S | 171.8   | 180.9  | 166.7  | C21orf42  | <a href="#">NM_058184.1</a> |                                     |             |             |              |
| GI_17158018-S | 200.8   | 254.5  | 242.2  | C21orf67  | <a href="#">NM_058188.1</a> | PRED54                              |             |             |              |
| GI_17158020-A | 157.8   | 172.2  | 154.6  | C21orf69  | <a href="#">NM_058189.1</a> | PRED54                              |             |             |              |

|               |         |        |        |          |                             |                                      |             |             |              |
|---------------|---------|--------|--------|----------|-----------------------------|--------------------------------------|-------------|-------------|--------------|
| GI_17158020-I | 604.4   | 716.4  | 633.3  | C21orf69 | <a href="#">NM_058189.1</a> | PRED54                               |             |             |              |
| GI_17158022-S | 192.6   | 177    | 136.1  | C21orf70 | <a href="#">NM_058190.1</a> | PRED56                               |             |             |              |
| GI_17158034-S | 98.5    | 118.4  | 106.3  | TECTB    | <a href="#">NM_058222.1</a> |                                      |             |             |              |
| GI_17158040-A | 112.6   | 103.4  | 88.8   | HDAC9    | <a href="#">NM_058177.1</a> | HD7;HDAC;HDRP;MITR;HDAC7;HDAC7B;H    | histone     | nucleus     | regulation   |
| GI_17158040-I | 99.2    | 105.3  | 109.5  | HDAC9    | <a href="#">NM_058177.1</a> | HD7;HDAC;HDRP;MITR;HDAC7;HDAC7B;H    | histone     | nucleus     | regulation   |
| GI_17158042-S | 21737.3 | 21394  | 17970  | RPL19    | <a href="#">NM_000981.2</a> |                                      | structural  | cytosolic   | protein      |
| GI_17158043-S | 33004.2 | 29048  | 24081  | RPS6     | <a href="#">NM_001010.2</a> |                                      | structural  | cytosolic   | protein      |
| GI_17196625-S | 132.5   | 160.7  | 158.6  | C22orf20 | <a href="#">NM_025225.2</a> | FLJ22012;dJ796117.1                  | catalytic   | integral to |              |
| GI_17318558-I | 132.9   | 137.3  | 123.4  | CCNE1    | <a href="#">NM_001238.1</a> | CCNE                                 | cyclin-     | nucleus     | G1/S         |
| GI_17318560-A | 129.5   | 161.3  | 152.3  | CCNE1    | <a href="#">NM_057182.1</a> | CCNE                                 | cyclin-     | nucleus     | G1/S         |
| GI_17318566-A | 229.8   | 331.1  | 353.4  | CCNE2    | <a href="#">NM_004702.2</a> | CYCE2                                | cyclin-     | nucleus     | cell cycle   |
| GI_17318568-S | 202.6   | 219.4  | 207.8  | KRT1     | <a href="#">NM_006121.2</a> | K1;CK1;KRT1A                         | structural  | intermedia  | epidermal    |
| GI_17318571-S | 89.4    | 97.4   | 89.9   | KRT3     | <a href="#">NM_057088.1</a> | K3;CK3                               | structural  | kinesin     | cytoskeleton |
| GI_17318573-S | 100     | 117.4  | 108.7  | KRT4     | <a href="#">NM_002272.1</a> | K4;CK4;CYK4;FLJ31692                 | structural  | intermedia  | epidermal    |
| GI_17318577-S | 342.9   | 375.1  | 339.1  | KRT5     | <a href="#">NM_000424.2</a> | K5;CK5;EBS2;KRT5A                    | structural  | intermedia  | epidermal    |
| GI_17352499-S | 181.9   | 309.9  | 384.9  | BDKRB2   | <a href="#">NM_000623.2</a> | B2R;BK2;BK-2;BKR2;BRB2               | bradykinin  | integral to | phosphati    |
| GI_17388802-S | 3381.6  | 2880.1 | 2085.4 | PAICS    | <a href="#">NM_006452.2</a> | AIRC;PAIS;ADE2H1                     | phosphori   | phosphori   | purine       |
| GI_17402869-I | 354.4   | 323.5  | 248.4  | BCCIP    | <a href="#">NM_016567.2</a> | TOK-1                                |             | nucleus     | regulation   |
| GI_17402870-A | 824.4   | 783.3  | 629.2  | BCCIP    | <a href="#">NM_078468.1</a> | TOK-1                                |             | nucleus     | regulation   |
| GI_17402870-I | 1934    | 1888   | 1566.1 | BCCIP    | <a href="#">NM_078468.1</a> | TOK-1                                |             | nucleus     | regulation   |
| GI_17402872-I | 165.2   | 157.2  | 157.2  | BCCIP    | <a href="#">NM_078469.1</a> | TOK-1                                |             | nucleus     | regulation   |
| GI_17402874-I | 7894    | 12384  | 5740.5 | COL6A2   | <a href="#">NM_001849.2</a> | PP3610;DKFZp586E1322                 | collagen    | collagen    | muscle       |
| GI_17402876-A | 480.5   | 850.4  | 461.8  | COL6A2   | <a href="#">NM_058174.1</a> | PP3610;DKFZp586E1322                 | collagen    | collagen    | muscle       |
| GI_17402878-I | 250.3   | 296.5  | 284.9  | COL6A2   | <a href="#">NM_058175.1</a> | PP3610;DKFZp586E1322                 | collagen    | collagen    | muscle       |
| GI_17402880-I | 87.8    | 78     | 77.7   | DLAD     | <a href="#">NM_021233.2</a> |                                      | deoxyribo   |             | DNA          |
| GI_17402881-A | 97.8    | 94.1   | 85.1   | DLAD     | <a href="#">NM_058248.1</a> |                                      | deoxyribo   |             | DNA          |
| GI_17402881-I | 112.6   | 116.7  | 114.1  | DLAD     | <a href="#">NM_058248.1</a> |                                      | deoxyribo   |             | DNA          |
| GI_17402883-A | 98.3    | 109    | 106.6  | KIAA1622 | <a href="#">NM_020958.2</a> |                                      |             |             |              |
| GI_17402883-I | 116.5   | 117.8  | 111.8  | KIAA1622 | <a href="#">NM_020958.2</a> |                                      |             |             |              |
| GI_17402885-I | 160.6   | 196.5  | 226.1  | KIAA1622 | <a href="#">NM_058237.1</a> |                                      |             |             |              |
| GI_17402889-A | 523.5   | 614.1  | 597.1  | NPTXR    | <a href="#">NM_058178.1</a> | NPR                                  | receptor    | integral to |              |
| GI_17402894-A | 855     | 767.3  | 764.3  | RAD51C   | <a href="#">NM_002876.2</a> | RAD51L2                              | adenosine   | nucleus     | DNA          |
| GI_17402894-I | 74.6    | 78.5   | 78.8   | RAD51C   | <a href="#">NM_002876.2</a> | RAD51L2                              | adenosine   | nucleus     | DNA          |
| GI_17402895-I | 401     | 456.5  | 417.7  | RAD51C   | <a href="#">NM_058216.1</a> | RAD51L2                              | adenosine   | nucleus     | DNA          |
| GI_17402899-S | 570.6   | 642.1  | 523.5  | FUBP1    | <a href="#">NM_003902.2</a> | FBP;FUBP                             | single-     | nucleus     | transcripti  |
| GI_17402901-S | 520.2   | 693.1  | 580.7  | GNB1L    | <a href="#">NM_053004.1</a> | GY2;FKSG1;WDR14;WDVCF;DGCRK3;KIAA    | molecular   | internal    | G-protein    |
| GI_17402905-S | 3794.5  | 3536.4 | 2636.6 | RPL22    | <a href="#">NM_000983.2</a> | EAP;HBP15;HBP15/L22                  | structural  | cytosolic   | protein      |
| GI_17402906-A | 114.3   | 102.1  | 106.6  | TRIM29   | <a href="#">NM_058193.1</a> | ATDC                                 | transcripti |             | transcripti  |
| GI_17402906-I | 76.3    | 92.4   | 72.9   | TRIM29   | <a href="#">NM_058193.1</a> | ATDC                                 | transcripti |             | transcripti  |
| GI_17402908-I | 346.7   | 418.5  | 330.6  | TRIM29   | <a href="#">NM_012101.2</a> | ATDC                                 | transcripti |             | transcripti  |
| GI_17402910-A | 1648.8  | 1856.5 | 1870.7 | VPS29    | <a href="#">NM_016226.2</a> | DC7;DC15;PEP11;FLJ20492;DKFZp564F022 | protein     |             | intracellula |
| GI_17402913-A | 98.1    | 125.2  | 112.7  | WNT16    | <a href="#">NM_016087.2</a> |                                      | extracellul | extracellul | developm     |
| GI_17402913-I | 133.9   | 131.3  | 126.9  | WNT16    | <a href="#">NM_016087.2</a> |                                      | extracellul | extracellul | developm     |
| GI_17402915-I | 109     | 116.9  | 105.6  | WNT16    | <a href="#">NM_057168.1</a> |                                      | extracellul | extracellul | developm     |

|               |         |        |        |           |                             |                   |          |             |           |
|---------------|---------|--------|--------|-----------|-----------------------------|-------------------|----------|-------------|-----------|
| GI_17402917-S | 508.6   | 1713.6 | 1456.4 | WNT5A     | <a href="#">NM_003392.2</a> | hWNT5A            | receptor | soluble     | embryoge  |
| GI_17402918-A | 199.7   | 379.6  | 292.1  | WNT5B     | <a href="#">NM_030775.2</a> | MGC2648           | signal   | extracellul | developm  |
| GI_17402918-I | 114.7   | 130.4  | 119.7  | WNT5B     | <a href="#">NM_030775.2</a> | MGC2648           | signal   | extracellul | developm  |
| GI_17402920-I | 143     | 162.4  | 144.7  | WNT5B     | <a href="#">NM_032642.2</a> | MGC2648           | signal   | extracellul | developm  |
| GI_17402930-I | 101.3   | 122.3  | 118    | SPAG11    | <a href="#">NM_058203.1</a> | EP2;HE2;EP2C;EP2D |          | extracellul | spermatog |
| GI_17402934-A | 91      | 89.9   | 87.6   | SPAG11    | <a href="#">NM_058207.1</a> | EP2;HE2;EP2C;EP2D |          | extracellul | spermatog |
| GI_17435003-S | 82.4    | 97.3   | 84.2   | LOC129614 | <a href="#">XM_065316.1</a> |                   |          |             |           |
| GI_17436546-S | 298     | 368.1  | 340.9  | LOC132706 | <a href="#">XM_067994.1</a> |                   |          |             |           |
| GI_17436980-S | 101.2   | 82.9   | 84.5   | LOC127059 | <a href="#">XM_060301.1</a> |                   |          |             |           |
| GI_17437014-S | 113.8   | 134.2  | 118.1  | LOC127066 | <a href="#">XM_060307.1</a> |                   |          |             |           |
| GI_17437031-S | 172.8   | 211.4  | 187.9  | LOC127069 | <a href="#">XM_060310.1</a> |                   |          |             |           |
| GI_17437058-S | 91.9    | 82.8   | 88.5   | LOC127074 | <a href="#">XM_060315.1</a> |                   |          |             |           |
| GI_17437334-S | 12086.6 | 10948  | 8552.2 | LOC127099 | <a href="#">XM_060328.1</a> |                   |          |             |           |
| GI_17437350-S | 164.9   | 149.5  | 150.1  | LOC130063 | <a href="#">XM_059396.1</a> |                   |          |             |           |
| GI_17437660-S | 77.8    | 113.8  | 91     | LOC130402 | <a href="#">XM_065715.1</a> |                   |          |             |           |
| GI_17438568-S | 107.6   | 109.8  | 107.7  | LOC131086 | <a href="#">XM_067193.1</a> |                   |          |             |           |
| GI_17443792-S | 81.7    | 88.9   | 84.3   | LOC127482 | <a href="#">XM_060509.1</a> |                   |          |             |           |
| GI_17444700-S | 1621.7  | 1488.4 | 1267.5 | LOC127545 | <a href="#">XM_060535.1</a> |                   |          |             |           |
| GI_17445393-S | 235.9   | 310.5  | 296.8  | LOC127617 | <a href="#">XM_060572.1</a> |                   |          |             |           |
| GI_17446452-S | 101.5   | 104.2  | 99     | LOC133185 | <a href="#">XM_068229.1</a> |                   |          |             |           |
| GI_17446851-S | 1063.1  | 1249.9 | 967.5  | LOC130678 | <a href="#">XM_065828.1</a> |                   |          |             |           |
| GI_17448143-S | 110.6   | 105.8  | 107.8  | C9orf11   | <a href="#">XM_035953.2</a> |                   |          |             |           |
| GI_17449884-S | 200.3   | 229.1  | 224.1  | LOC134505 | <a href="#">XM_068889.1</a> |                   |          |             |           |
| GI_17451521-S | 103.7   | 109.4  | 107.9  | LOC128371 | <a href="#">XM_060956.1</a> |                   |          |             |           |
| GI_17454506-S | 7979.7  | 7461.4 | 6673.7 | LOC122585 | <a href="#">XM_063202.1</a> |                   |          |             |           |
| GI_17456752-S | 103.7   | 104.9  | 92.4   | LOC119682 | <a href="#">XM_061614.1</a> |                   |          |             |           |
| GI_17456788-S | 192.5   | 203.5  | 201.7  | LOC119692 | <a href="#">XM_061624.1</a> |                   |          |             |           |
| GI_17459234-S | 127.4   | 148.3  | 130.1  | LOC139061 | <a href="#">XM_066452.1</a> |                   |          |             |           |
| GI_17459487-S | 101.5   | 115.8  | 109.9  | LOC139116 | <a href="#">XM_066484.1</a> |                   |          |             |           |
| GI_17460102-S | 103.5   | 114.3  | 109.6  | LOC120586 | <a href="#">XM_062162.1</a> |                   |          |             |           |
| GI_17461456-S | 351     | 434    | 394.9  | LOC120775 | <a href="#">XM_062285.1</a> |                   |          |             |           |
| GI_17461543-S | 87.6    | 92.8   | 91.3   | LOC120787 | <a href="#">XM_062263.1</a> |                   |          |             |           |
| GI_17462608-S | 98.5    | 103.5  | 100    | LOC132870 | <a href="#">XM_059608.1</a> |                   |          |             |           |
| GI_17466805-S | 212.3   | 250.1  | 229.2  | LOC137485 | <a href="#">XM_059909.1</a> |                   |          |             |           |
| GI_17470104-S | 312.7   | 378.3  | 356.8  | LOC138881 | <a href="#">XM_071150.1</a> |                   |          |             |           |
| GI_17470112-S | 307.4   | 396.3  | 364.1  | LOC138883 | <a href="#">XM_071152.1</a> |                   |          |             |           |
| GI_17474308-S | 94.2    | 100.8  | 90.4   | LOC121129 | <a href="#">XM_062467.1</a> |                   |          |             |           |
| GI_17474608-S | 184.9   | 192.8  | 206.1  | LOC121275 | <a href="#">XM_062553.1</a> |                   |          |             |           |
| GI_17475183-S | 116.8   | 133.5  | 115.6  | LOC121792 | <a href="#">XM_062788.1</a> |                   |          |             |           |
| GI_17475713-S | 113.6   | 119.8  | 132.9  | LOC122038 | <a href="#">XM_062912.1</a> |                   |          |             |           |
| GI_17476687-S | 125.8   | 131.4  | 112.9  | LOC122742 | <a href="#">XM_063310.1</a> |                   |          |             |           |
| GI_17476953-S | 122.5   | 131.2  | 121.6  | LOC122867 | <a href="#">XM_063336.1</a> |                   |          |             |           |
| GI_17480196-S | 89.5    | 101.6  | 88     | LOC124871 | <a href="#">XM_058857.1</a> |                   |          |             |           |
| GI_17482322-S | 10465.7 | 10901  | 8368.1 | LOC125910 | <a href="#">XM_064859.1</a> |                   |          |             |           |



|               |        |        |        |           |                             |                                      |             |                         |
|---------------|--------|--------|--------|-----------|-----------------------------|--------------------------------------|-------------|-------------------------|
| GI_17482451-S | 242.8  | 307.9  | 250.7  | LOC125963 | <a href="#">XM_064884.1</a> |                                      |             |                         |
| GI_17482470-S | 171.9  | 182.3  | 217.9  | MGC20533  | <a href="#">XM_050564.2</a> |                                      |             |                         |
| GI_17484248-S | 191.2  | 211.4  | 207.8  | RPS4L     | <a href="#">XM_066040.1</a> | dJ843L14.2                           |             |                         |
| GI_17484446-S | 148.4  | 194.2  | 167.3  | RPL7A2    | <a href="#">XM_066102.1</a> | dJ189G13.1                           |             |                         |
| GI_17484710-S | 113.7  | 122.7  | 105.5  | SLC25A5L  | <a href="#">XM_066162.1</a> | dJ1065O2.2                           |             |                         |
| GI_17484771-S | 85.1   | 90.2   | 83.8   | LOC128820 | <a href="#">XM_066176.1</a> |                                      |             |                         |
| GI_17484775-S | 114.9  | 118.8  | 109.2  | LOC128822 | <a href="#">XM_066177.1</a> |                                      |             |                         |
| GI_17484794-S | 100.1  | 120.5  | 103.7  | GGTLA3    | <a href="#">XM_066189.1</a> | dJ831C21.1                           |             |                         |
| GI_17486064-S | 74     | 71.2   | 81     | LOC139542 | <a href="#">XM_066752.1</a> |                                      |             |                         |
| GI_17488773-S | 90.9   | 111    | 107.9  | LOC127665 | <a href="#">XM_060597.1</a> |                                      |             |                         |
| GI_17505186-S | 195.1  | 219    | 187.1  | KRT6A     | <a href="#">NM_005554.2</a> | K6A;CK6A                             | structural  | intermedia ectoderm     |
| GI_17505187-S | 153.9  | 180    | 161.6  | KRT6B     | <a href="#">NM_005555.2</a> | K6B;PC2;CK6B                         | structural  | intermedia ectoderm     |
| GI_17505188-S | 205.2  | 231.6  | 209.5  | KRT6C     | <a href="#">NM_058242.1</a> | K6C;CK6C                             | structural  | kinesin cytoskelet      |
| GI_17505192-S | 115.2  | 151.2  | 169.5  | WNT7B     | <a href="#">NM_058238.1</a> |                                      | extracellul | extracellul developm    |
| GI_17505194-I | 170.7  | 179.1  | 172.4  | WNT8A     | <a href="#">NM_058244.1</a> | WNT8D                                | signal      | extracellul developm    |
| GI_17505196-S | 124.1  | 126    | 120.3  | WNT8B     | <a href="#">NM_003393.2</a> |                                      | signal      | extracellul embryoge    |
| GI_17505197-S | 83.2   | 93.7   | 95.3   | ACSL6     | <a href="#">NM_015256.1</a> | ACS2;FACL6;LACS2;LACS5;KIAA0837      | long-chain- | mitochondr acyl-CoA     |
| GI_17505233-A | 250.5  | 271.5  | 297.8  | NUSAP1    | <a href="#">NM_018454.4</a> | LNP;ANKT;SAPL;BM037;Q0310;FLJ13421;P |             |                         |
| GI_17511204-S | 346.9  | 408.3  | 276.1  | GPR124    | <a href="#">NM_032777.6</a> | TEM5;FLJ14390;KIAA1531;DKFZp434C211; |             |                         |
| GI_17511208-S | 2713   | 2547.2 | 2170.5 | TENS1     | <a href="#">NM_022748.6</a> | TEM6;FLJ13732;H_NH049I23.2           | protein-    | intracellula            |
| GI_17511260-S | 180.7  | 209.2  | 174.5  | PPP1R14D  | <a href="#">NM_017726.6</a> | FLJ20251;CPI17-like                  |             |                         |
| GI_17511434-S | 599.9  | 630.6  | 521.7  | ROBO4     | <a href="#">NM_019055.4</a> | FLJ20798                             |             |                         |
| GI_17530790-S | 148.9  | 143.8  | 121.9  | ZNF354B   | <a href="#">NM_058230.1</a> | KID2;FLJ25008                        | nucleic     | intracellula regulation |
| GI_17572803-S | 450.5  | 529.7  | 502.9  | ASPCR1    | <a href="#">NM_024083.2</a> | TUG;ASPL;ASPS;RCC17;ASPCR1           |             |                         |
| GI_17572806-S | 210.6  | 287.9  | 259.6  | ASP       | <a href="#">NM_031916.2</a> |                                      | cAMP-       | signal                  |
| GI_17572809-S | 951.2  | 1184.2 | 1245.7 | THOC4     | <a href="#">NM_005782.1</a> | ALY;BEF                              | transcripti | nucleus protein         |
| GI_17572813-S | 121.9  | 126.3  | 113.9  | ABT1      | <a href="#">NM_013375.2</a> | hABT1                                | general     | nucleus transcripti     |
| GI_17572819-S | 95.5   | 103.9  | 107.2  | ARS       | <a href="#">NM_020427.2</a> | MDM;ANUP;SLURP1                      | cytokine    | extracellul biological_ |
| GI_17572823-S | 99.7   | 101.4  | 89.9   | AVIL      | <a href="#">NM_006576.2</a> | p92;DOC6;ADVIL;FLJ12386              | actin       | actin neurogene         |
| GI_17738286-S | 2549.8 | 2867.5 | 3151   | SCAMP4    | <a href="#">NM_079834.1</a> | SCAMP-4                              |             |                         |
| GI_17738293-I | 97.5   | 116.6  | 94.7   | CDKN2A    | <a href="#">NM_058195.1</a> | ARF;MLM;P16;p14;p19;CMM2;INK4;MTS1;T | cyclin-     | nucleus cell cycle      |
| GI_17738295-A | 275.6  | 329.4  | 309.6  | CDKN2A    | <a href="#">NM_058196.1</a> | ARF;MLM;P16;p14;p19;CMM2;INK4;MTS1;T | cyclin-     | nucleus cell cycle      |
| GI_17738297-I | 92.3   | 91.4   | 100.7  | CDKN2A    | <a href="#">NM_058197.1</a> | ARF;MLM;P16;p14;p19;CMM2;INK4;MTS1;T | cyclin-     | nucleus cell cycle      |
| GI_17738300-S | 405.3  | 560    | 435.2  | COL7A1    | <a href="#">NM_000094.2</a> | EBD1;EBR1;EBDCT                      | collagen    | basement epidermal      |
| GI_17738304-S | 120.9  | 129.7  | 139.2  | ARHD      | <a href="#">NM_014578.2</a> | Rho;RHOM;RhoD;RHOHP1                 | Rho small   | Rho                     |
| GI_17738306-S | 101.2  | 99.3   | 102    | CPLX2     | <a href="#">NM_006650.2</a> | CPX2;921-L                           | vesicle     | nonselecti              |
| GI_17738307-S | 1211.7 | 1156.4 | 1361.7 | FREQ      | <a href="#">NM_014286.2</a> | FLUP;NCS1;NCS-1;DKFZp761L1223        | calcium-    | cellular_co cell        |
| GI_17738309-S | 1411.3 | 1738.8 | 1721.2 | BBP       | <a href="#">NM_032027.2</a> |                                      |             |                         |
| GI_17738311-S | 201.3  | 250.4  | 245.6  | CCIN      | <a href="#">NM_005893.1</a> |                                      | structural  | cytoskelet spermatog    |
| GI_17738313-S | 577.2  | 575.3  | 538.2  | CCNH      | <a href="#">NM_001239.2</a> | CAK;p34;p37                          | cyclin-     | nucleus regulation      |
| GI_17738314-S | 7603.6 | 7488.6 | 4586.1 | CCNI      | <a href="#">NM_006835.2</a> | CYI;CYC1                             | cyclin-     | spermatog               |
| GI_17738315-A | 112.8  | 150.6  | 115.6  | CYP3A43   | <a href="#">NM_057096.2</a> |                                      |             |                         |
| GI_17864089-S | 361.1  | 324    | 359.5  | AUTS2     | <a href="#">NM_015570.1</a> | KIAA0442                             | molecular   | cellular_co biological_ |
| GI_17864091-S | 221.7  | 261.6  | 237    | DNAH7     | <a href="#">NM_018897.1</a> | KIAA0944                             | nucleotide  | dynein microtubul       |

|               |        |        |        |           |                             |                                |             |                       |
|---------------|--------|--------|--------|-----------|-----------------------------|--------------------------------|-------------|-----------------------|
| GI_17865794-I | 180.2  | 203.9  | 205.8  | BLP1      | <a href="#">NM_031940.2</a> |                                |             |                       |
| GI_17865796-A | 993.8  | 1218   | 941.1  | BLP1      | <a href="#">NM_078473.1</a> |                                |             |                       |
| GI_17865798-A | 2594.1 | 2961.8 | 2375.8 | BLP2      | <a href="#">NM_025141.2</a> | FLJ22604                       |             |                       |
| GI_17865799-I | 262.2  | 321.3  | 280.8  | BLP2      | <a href="#">NM_078474.1</a> | FLJ22604                       |             |                       |
| GI_17865801-S | 1480.1 | 1526.1 | 1402.7 | VPS4B     | <a href="#">NM_004869.2</a> | SKD1;VPS4-2                    | peroxisom   | membran               |
| GI_17865806-S | 659    | 666.6  | 732.6  | VPS4A     | <a href="#">NM_013245.2</a> | SKD1;SKD2;VPS4;VPS4-1;FLJ22197 | ATP         | cytosol nonselecti    |
| GI_17865813-I | 137.6  | 151.1  | 127.2  | VNN2      | <a href="#">NM_004665.2</a> | FOAP-4;GPI-80                  | hydrolase   | cell                  |
| GI_17865815-A | 290.7  | 321    | 314    | VNN2      | <a href="#">NM_078488.1</a> | FOAP-4;GPI-80                  | hydrolase   | cell                  |
| GI_17865815-I | 126.3  | 151.8  | 135.4  | VNN2      | <a href="#">NM_078488.1</a> | FOAP-4;GPI-80                  | hydrolase   | cell                  |
| GI_17865817-I | 107    | 114.7  | 95.6   | VNN3      | <a href="#">NM_018399.2</a> | HSA238982                      |             |                       |
| GI_17865818-A | 99.5   | 96.4   | 97.1   | VNN3      | <a href="#">NM_078625.1</a> | HSA238982                      |             |                       |
| GI_17865818-I | 91.5   | 81.2   | 83.6   | VNN3      | <a href="#">NM_078625.1</a> | HSA238982                      |             |                       |
| GI_17921981-S | 529.5  | 491.7  | 421    | COX10     | <a href="#">NM_001303.2</a> |                                | farnesyltra | mitochond heme        |
| GI_17921983-S | 252.2  | 240.9  | 215.1  | COX11     | <a href="#">NM_004375.2</a> | COX11P                         | cytochrom   | integral to cytochrom |
| GI_17921988-S | 2854.5 | 2616.8 | 1924   | TUBA1     | <a href="#">NM_006000.1</a> | FLJ30169;H2-ALPHA              | structural  | microtubul            |
| GI_17921990-A | 1104.5 | 952.7  | 1036.1 | TUBA2     | <a href="#">NM_079836.1</a> | baA408E5.3                     | structural  | microtubul microtubul |
| GI_17921992-I | 1158.2 | 926.9  | 837.5  | TUBA2     | <a href="#">NM_006001.1</a> | baA408E5.3                     | structural  | microtubul microtubul |
| GI_17921994-S | 136.2  | 128.1  | 130    | COL9A3    | <a href="#">NM_001853.2</a> | IDD;MED;EDM3;DJ885L7.4.1       | collagen    | collagen              |
| GI_17921996-S | 104.4  | 114.8  | 106.8  | MYL4      | <a href="#">NM_002476.2</a> | GT1;ALC1;AMLC;PRO1957          | structural  | muscle                |
| GI_17933755-S | 103.2  | 100.7  | 105.8  | GBA3      | <a href="#">NM_020973.2</a> | GLUC;CBGL1                     | hydrolase   | carbohydr             |
| GI_17933771-S | 4954.4 | 4442   | 5619.4 | S100A16   | <a href="#">NM_080388.1</a> | S100F;DT1P1A7;MGC17528         | calcium     |                       |
| GI_17939343-S | 127.2  | 211.6  | 107.1  | TTYH2     | <a href="#">NM_032646.4</a> | MGC4837                        |             |                       |
| GI_17939347-S | 131.8  | 148.7  | 136.3  | DEFB104   | <a href="#">NM_080389.1</a> | DEFB4;DEFB-4                   |             | xenobiotic            |
| GI_17941284-S | 104.4  | 100.1  | 100.8  | KST1      | <a href="#">NM_052944.2</a> | RKST1;SMIT2                    | transporte  | membran transport     |
| GI_17975596-S | 790.6  | 1208.5 | 1099.6 | SELM      | <a href="#">NM_080430.1</a> |                                | selenium    |                       |
| GI_17975754-I | 328.7  | 420.8  | 451    | MSL3L1    | <a href="#">NM_078628.1</a> | DKFZP586J1822                  | transcripti | nucleus transcripti   |
| GI_17975758-A | 340.8  | 412.6  | 373.4  | MSL3L1    | <a href="#">NM_078630.1</a> | DKFZP586J1822                  | transcripti | nucleus transcripti   |
| GI_17975760-I | 103.9  | 134.5  | 103.4  | MSL3L1    | <a href="#">NM_006800.2</a> | DKFZP586J1822                  | transcripti | nucleus transcripti   |
| GI_17975764-A | 3118.5 | 2388.6 | 2653.5 | EPHB2     | <a href="#">NM_017449.1</a> | DRT;ERK;Hek5;EPHT3;Tyro5       | transmem    | integral to oncogene  |
| GI_17975771-I | 105.1  | 110.8  | 110    | BTN2A1    | <a href="#">NM_078476.1</a> | BTF1;BT2.1                     |             | integral to lipid     |
| GI_17975773-A | 330.9  | 384.2  | 349.4  | BTN2A1    | <a href="#">NM_007049.2</a> | BTF1;BT2.1                     |             | integral to lipid     |
| GI_17978302-S | 109.2  | 111.3  | 101.4  | SERPINB11 | <a href="#">NM_080475.1</a> | EPIPIN                         | serpin      |                       |
| GI_17978464-S | 387    | 473.7  | 495.4  | TWIST1    | <a href="#">NM_000474.2</a> | SCS;ACS3;BPES2;BPES3;TWIST     | enzyme      | nucleus chromoso      |
| GI_17978465-S | 278.6  | 320.2  | 283.9  | CCNT1     | <a href="#">NM_001240.2</a> | CCNT;CYCT1                     | cyclin-     | kinesin regulation    |
| GI_17978467-A | 317.5  | 433.9  | 444.8  | CCNT2     | <a href="#">NM_001241.2</a> |                                | cyclin-     | kinesin regulation    |
| GI_17978468-I | 560.7  | 705.6  | 595.8  | CCNT2     | <a href="#">NM_058241.1</a> |                                | cyclin-     | kinesin regulation    |
| GI_17978470-S | 77.3   | 98.2   | 89.5   | ATP8A1    | <a href="#">NM_006095.1</a> | ATPIA;ATPP2;ATPASEII           | ATP         | integral to aminopho  |
| GI_17978473-S | 131.7  | 128.2  | 122.9  | HHEX      | <a href="#">NM_002729.2</a> | HEX;PRH;HMPH;PRHX;HOX11L-PEN   | DNA         | nucleus developm      |
| GI_17978474-S | 181.6  | 190.6  | 175.3  | OLIG2     | <a href="#">NM_005806.1</a> | BHLHB1;RACK17;PRKCBP2          | DNA         | nucleus cell growth   |
| GI_17978476-S | 243.4  | 302.4  | 316.1  | VPS11     | <a href="#">NM_021729.3</a> | END1;PEP5;RNF108;hVPS11        | ATP         | kinesin intracellula  |
| GI_17978478-I | 173.9  | 184    | 156.4  | VPS16     | <a href="#">NM_022575.2</a> | hVPS16                         | protein     | membran intracellula  |
| GI_17978482-A | 1876.2 | 1960.6 | 1151.6 | VPS16     | <a href="#">NM_080414.1</a> | hVPS16                         | protein     | membran intracellula  |
| GI_17978482-I | 347.8  | 396.2  | 371    | VPS16     | <a href="#">NM_080414.1</a> | hVPS16                         | protein     | membran intracellula  |
| GI_17978486-S | 1963.8 | 2740.6 | 2621.2 | VPS18     | <a href="#">NM_080432.1</a> | KIAA1475                       | protein     | membran intracellula  |

|               |         |        |        |           |                             |                                      |            |             |              |
|---------------|---------|--------|--------|-----------|-----------------------------|--------------------------------------|------------|-------------|--------------|
| GI_17978488-A | 1505.1  | 2130.1 | 2128   | CD97      | <a href="#">NM_001784.2</a> | TM7LN1                               | G-protein  | integral to | G-protein    |
| GI_17978490-I | 131.9   | 143.5  | 126    | CD97      | <a href="#">NM_078481.1</a> | TM7LN1                               | G-protein  | integral to | G-protein    |
| GI_17978492-S | 3795.4  | 4438.3 | 4835.6 | CDK2AP1   | <a href="#">NM_004642.2</a> | DOC1;ST19;DORC1;doc-1;p12DOC-1       | tumor      | cytoplasm   | S phase      |
| GI_17978494-I | 110.6   | 107.7  | 107.1  | CDKN1A    | <a href="#">NM_078467.1</a> | P21;CIP1;SDI1;WAF1;CAP20;CDKN1;MDA-6 | cyclin-    | nucleus     | induction    |
| GI_17978496-A | 9008.7  | 12007  | 9372.8 | CDKN1A    | <a href="#">NM_000389.2</a> | P21;CIP1;SDI1;WAF1;CAP20;CDKN1;MDA-6 | cyclin-    | nucleus     | induction    |
| GI_17978497-S | 622.4   | 1020.5 | 998.7  | CDKN1B    | <a href="#">NM_004064.2</a> | KIP1;CDKN4;P27KIP1                   | cyclin-    | nucleus     | cell cycle   |
| GI_17978499-A | 585.1   | 623.9  | 619    | CNOT7     | <a href="#">NM_054026.1</a> | CAF1;hCAF-1                          | signal     | nucleus     | carbohydr    |
| GI_17978499-I | 177.7   | 194.7  | 199.4  | CNOT7     | <a href="#">NM_054026.1</a> | CAF1;hCAF-1                          | signal     | nucleus     | carbohydr    |
| GI_17978501-A | 98.3    | 105.5  | 84     | COL9A1    | <a href="#">NM_001851.2</a> | MED;DJ149L1.1.2                      | collagen   | microfibril | histogene    |
| GI_17978501-I | 113.3   | 150.8  | 114    | COL9A1    | <a href="#">NM_001851.2</a> | MED;DJ149L1.1.2                      | collagen   | microfibril | histogene    |
| GI_17978503-A | 176.2   | 194.1  | 179.8  | COL9A1    | <a href="#">NM_078485.1</a> | MED;DJ149L1.1.2                      | collagen   | microfibril | histogene    |
| GI_17978503-I | 94.6    | 87.4   | 87.1   | COL9A1    | <a href="#">NM_078485.1</a> | MED;DJ149L1.1.2                      | collagen   | microfibril | histogene    |
| GI_17978510-A | 4985.2  | 5496.3 | 5641.2 | SIAHBP1   | <a href="#">NM_014281.3</a> | FIR;PUF60;RoBPI                      |            |             |              |
| GI_17978513-S | 184.4   | 208.7  | 186.8  | TNS       | <a href="#">NM_022648.2</a> | TNS1;PRO0929;FLJ10923;DKFZP434G162   |            |             |              |
| GI_17978517-S | 86.2    | 106.8  | 98     | TNFRSF13C | <a href="#">NM_052945.2</a> | BAFFR                                | receptor   | integral to | immune       |
| GI_17978518-S | 4008    | 3147.9 | 3539.3 | VPS26     | <a href="#">NM_004896.2</a> | HB58;Hbeta58;FLJ12930                | protein    | cytosol     | intracellula |
| GI_17981693-A | 79.3    | 82.8   | 79     | CDKN2B    | <a href="#">NM_004936.2</a> | P15;MTS2;TP15;INK4B                  | cyclin-    |             | cell cycle   |
| GI_17981695-I | 96.6    | 81.3   | 97.7   | CDKN2B    | <a href="#">NM_078487.1</a> | P15;MTS2;TP15;INK4B                  | cyclin-    |             | cell cycle   |
| GI_17981697-I | 210.6   | 279.3  | 325.8  | CDKN2C    | <a href="#">NM_001262.2</a> | p18;INK4C;p18-INK4C                  | cyclin-    | cytoplasm   | cell cycle   |
| GI_17981698-A | 245.9   | 454    | 584.8  | CDKN2C    | <a href="#">NM_078626.1</a> | p18;INK4C;p18-INK4C                  | cyclin-    | cytoplasm   | cell cycle   |
| GI_17981698-I | 219.7   | 326.9  | 302.7  | CDKN2C    | <a href="#">NM_078626.1</a> | p18;INK4C;p18-INK4C                  | cyclin-    | cytoplasm   | cell cycle   |
| GI_17981701-I | 96.7    | 92.4   | 97.5   | CDKN2D    | <a href="#">NM_079421.1</a> | p19;INK4D;p19-INK4D                  |            |             |              |
| GI_17981703-S | 1054.1  | 1234.9 | 866.4  | CDKN3     | <a href="#">NM_005192.2</a> | KAP;CDI1;CIP2;KAP1                   | protein    |             | G1/S         |
| GI_17981706-S | 8344.7  | 7126   | 5798.7 | RPS4Y     | <a href="#">NM_001008.2</a> | RPS4Y1                               | structural | ribosome    | protein      |
| GI_17981707-S | 2193.7  | 1685.3 | 1781.9 | TWIST2    | <a href="#">NM_057179.1</a> | DERMO1                               | DNA        | cytoplasm   | cell         |
| GI_17981709-S | 13529.3 | 11953  | 10737  | FAU       | <a href="#">NM_001997.2</a> | FAU1;RPS30                           | ubiquitin  | ribosome    | protein      |
| GI_17986244-I | 131.5   | 131.7  | 121.8  | PNUTL2    | <a href="#">NM_080415.1</a> | H5;ARTS;CE5B3;SEPT4;hucep-7;hCDCREL- | GTPase     |             | cytokinesi   |
| GI_17986246-A | 116.4   | 157.2  | 114.3  | PNUTL2    | <a href="#">NM_080416.1</a> | H5;ARTS;CE5B3;SEPT4;hucep-7;hCDCREL- | GTPase     |             | cytokinesi   |
| GI_17986248-I | 117.4   | 135.1  | 126    | PNUTL2    | <a href="#">NM_080417.1</a> | H5;ARTS;CE5B3;SEPT4;hucep-7;hCDCREL- | GTPase     |             | cytokinesi   |
| GI_17986251-A | 462.1   | 466.2  | 485    | SP110     | <a href="#">NM_004510.2</a> | IFI41;IFI75;FLJ22835                 | hematopoi  | nucleus     | regulation   |
| GI_17986251-I | 570     | 564.9  | 728.6  | SP110     | <a href="#">NM_004510.2</a> | IFI41;IFI75;FLJ22835                 | hematopoi  | nucleus     | regulation   |
| GI_17986253-I | 129.6   | 130.5  | 104    | SP110     | <a href="#">NM_080424.1</a> | IFI41;IFI75;FLJ22835                 | hematopoi  | nucleus     | regulation   |
| GI_17986259-A | 5735    | 9838.3 | 7924.7 | MYL6      | <a href="#">NM_079423.1</a> | ESMLC;LC17A;LC17B;MLC1SM;MLC3NM;M    | structural | non-        |              |
| GI_17986267-A | 236.4   | 229.9  | 236.2  | BANP      | <a href="#">NM_079837.1</a> | SMAR1;FLJ10177;FLJ20538;DKFZp761H17  |            |             |              |
| GI_17986269-A | 107.1   | 202.4  | 415.1  | DRD2      | <a href="#">NM_016574.2</a> | D2R;D2DR                             | dopamine   | intermedia  | dopamine     |
| GI_17986271-I | 104.4   | 118    | 148.6  | DRD2      | <a href="#">NM_000795.2</a> | D2R;D2DR                             | dopamine   | intermedia  | dopamine     |
| GI_17986272-I | 102.6   | 98     | 90.9   | MYL1      | <a href="#">NM_079420.1</a> | MLC1F;MLC3F                          | structural | muscle      |              |
| GI_17986274-I | 130.8   | 158.8  | 142.7  | MYL1      | <a href="#">NM_079422.1</a> | MLC1F;MLC3F                          | structural | muscle      |              |
| GI_17986276-S | 4423.1  | 6193.5 | 3140.3 | COL4A2    | <a href="#">NM_001846.1</a> | FLJ22259                             | collagen   | collagen    | extracellul  |
| GI_17986278-S | 282.4   | 301.5  | 277.7  | MC3R      | <a href="#">NM_019888.2</a> | MC3                                  | melanocor  | integral to | G-protein    |
| GI_17986280-S | 8248.5  | 8671.2 | 6182.6 | MLC1SA    | <a href="#">NM_002475.2</a> |                                      | structural | muscle      | muscle       |
| GI_17986281-S | 1172    | 1831.4 | 1543.2 | PTP4A1    | <a href="#">NM_003463.2</a> | HH72;PRL1;PRL-1;PTPCAAX1;PTP(CAAX1)  | protein    | nucleus     | oncogene     |
| GI_17986282-S | 6130.9  | 11727  | 7288.7 | TUBA3     | <a href="#">NM_006009.2</a> | FLJ25113;B-ALPHA-1                   | structural | microtubul  | glia cell    |
| GI_17998550-S | 97.5    | 107.6  | 92.5   | SERPINB12 | <a href="#">NM_080474.1</a> | YUKOPIN                              | serpin     | cytoplasm   | negative     |

|               |        |        |        |           |                             |                                       |             |              |              |
|---------------|--------|--------|--------|-----------|-----------------------------|---------------------------------------|-------------|--------------|--------------|
| GI_17999523-S | 110.6  | 108.5  | 90.2   | ACRBP     | <a href="#">NM_032489.2</a> | SP32;OY-TES-1                         |             |              |              |
| GI_17999525-S | 92.9   | 108.8  | 105.2  | COX4I2    | <a href="#">NM_032609.2</a> | COX4;COX4B;COX4-2;COXIV-              | aa3-type    | mitochond    | electron     |
| GI_17999527-S | 6376.4 | 8124.2 | 6693.8 | COX6A1    | <a href="#">NM_004373.2</a> | COX6A;COX6AL                          |             |              | energy       |
| GI_17999529-S | 196.1  | 224.5  | 212.9  | COX6A2    | <a href="#">NM_005205.2</a> | COX6AH;COXVIAH                        | aa3-type    | mitochond    | energy       |
| GI_17999530-S | 3799.6 | 4669.5 | 4001.9 | COX6B     | <a href="#">NM_001863.3</a> | COXG                                  | aa3-type    | mitochond    | electron     |
| GI_17999531-S | 4344.5 | 5385.7 | 4694   | COX6C     | <a href="#">NM_004374.2</a> |                                       | aa3-type    | mitochond    | energy       |
| GI_17999532-S | 615.9  | 543.7  | 780.5  | PHYH      | <a href="#">NM_006214.2</a> | PAHX                                  | catalytic   | peroxisom    | lipid        |
| GI_17999533-S | 408    | 478.6  | 419.9  | PRPF18    | <a href="#">NM_003675.2</a> | PRP18;hPrp18                          | pre-mRNA    | spliceoso    | mRNA         |
| GI_17999536-S | 2085.9 | 2643.5 | 2583.8 | PRPF8     | <a href="#">NM_006445.2</a> | PRP8;RP13;HPRP8;PRPC8                 | pre-mRNA    | snRNP U5     | mRNA         |
| GI_18034689-S | 857.7  | 1147.8 | 1469.9 | C20orf4   | <a href="#">NM_015511.2</a> | CGI-23;bA234K24.2;DKFZp564N1363       |             |              |              |
| GI_18034691-I | 4176.3 | 4351.2 | 4316.4 | CDW92     | <a href="#">NM_080546.2</a> | CTL1;CHTL1                            |             |              |              |
| GI_18079215-S | 92     | 82.9   | 87.8   | CASKIN1   | <a href="#">NM_020764.1</a> | KIAA1306                              |             |              |              |
| GI_18079315-S | 1649.9 | 1242.9 | 1285.9 | TJP4      | <a href="#">NM_080604.1</a> | PILT                                  |             |              |              |
| GI_18079320-S | 152.9  | 164.5  | 142.3  | C20orf102 | <a href="#">NM_080607.1</a> | dJ1118M15.2                           |             |              |              |
| GI_18079322-S | 158.7  | 141.5  | 150    | GAB3      | <a href="#">NM_080612.1</a> |                                       |             |              |              |
| GI_18079324-S | 297.5  | 266.8  | 338.4  | C20orf112 | <a href="#">NM_080616.1</a> | dJ1184F4.2                            |             |              |              |
| GI_18087810-S | 940    | 654.8  | 678.3  | THRAP6    | <a href="#">NM_080651.1</a> | TRAP25;MGC9890                        | transcripti | nucleus      | transcripti  |
| GI_18087816-S | 96.9   | 104.7  | 102.5  | NY-REN-41 | <a href="#">NM_080654.1</a> |                                       |             |              |              |
| GI_18087818-S | 1693.9 | 2060.5 | 2166.2 | MGC17337  | <a href="#">NM_080655.1</a> |                                       |             |              |              |
| GI_18087820-S | 154.7  | 177.6  | 167.8  | MGC13017  | <a href="#">NM_080656.1</a> |                                       |             |              |              |
| GI_18087824-S | 205.3  | 265.5  | 210.8  | ACY-3     | <a href="#">NM_080658.1</a> | HCBP1;MGC9740                         |             |              |              |
| GI_18087826-S | 86.6   | 93.7   | 89.7   | MGC14839  | <a href="#">NM_080659.1</a> | FLJ25219                              |             |              |              |
| GI_18087834-S | 111.4  | 127.6  | 114.7  | MGC16943  | <a href="#">NM_080663.1</a> | KIAA1504                              | exonuclea   | intracellula |              |
| GI_18087836-S | 191.3  | 176.5  | 174.7  | C14orf126 | <a href="#">NM_080664.1</a> | MGC9912                               | hydrolase   | cytoplasm    | D-amino      |
| GI_18087840-S | 104.8  | 115.5  | 111.1  | LOC112840 | <a href="#">NM_080666.1</a> | MGC9907                               |             | extrachro    |              |
| GI_18087850-S | 94.6   | 103    | 103.6  | KCNE4     | <a href="#">NM_080671.1</a> | MIRP3;MGC20353                        | voltage-    | integral to  | potassium    |
| GI_18087854-S | 508.3  | 581.4  | 619.9  | Dlc2      | <a href="#">NM_080677.1</a> | MGC17810                              | microtubul  | microtubul   | microtubul   |
| GI_18087856-S | 927.5  | 1070.3 | 1063.5 | NCE2      | <a href="#">NM_080678.1</a> | MGC18120                              | ubiquitin   |              | ubiquitin    |
| GI_18104939-S | 119.4  | 127.7  | 122.4  | CST9L     | <a href="#">NM_080610.1</a> | bA218C14.1                            | cysteine    |              |              |
| GI_18104947-S | 5949.4 | 5746.4 | 4396.7 | RPL21     | <a href="#">NM_000982.2</a> | L21                                   | structural  | cytosolic    | protein      |
| GI_18104949-A | 102.1  | 115.9  | 96.9   | TBX1      | <a href="#">NM_080646.1</a> | DGS;TGA;CAFS;CTHM;DGCR;DORV;VCFS; RNA | nucleus     |              | heart        |
| GI_18104949-I | 101.5  | 89.8   | 92.3   | TBX1      | <a href="#">NM_080646.1</a> | DGS;TGA;CAFS;CTHM;DGCR;DORV;VCFS; RNA | nucleus     |              | heart        |
| GI_18104951-I | 125.3  | 153.7  | 143.2  | TBX1      | <a href="#">NM_080647.1</a> | DGS;TGA;CAFS;CTHM;DGCR;DORV;VCFS; RNA | nucleus     |              | heart        |
| GI_18104955-A | 547.7  | 664.7  | 612.7  | MAG       | <a href="#">NM_002361.2</a> | GMA;S-MAG;SIGLEC-4A                   | sugar       | membran      | cell         |
| GI_18104958-S | 105.5  | 125.3  | 100.8  | APACD     | <a href="#">NM_005783.2</a> |                                       | electron    |              | electron     |
| GI_18104960-S | 2515.9 | 2188.2 | 2231.6 | APPBP1    | <a href="#">NM_003905.2</a> | A-116A10.1;DKFZP434P241               | catalytic   | cytoplasm    | signal       |
| GI_18104961-S | 271.4  | 279.6  | 235.2  | APPBP2    | <a href="#">NM_006380.2</a> | PAT1;HS.84084;KIAA0228                | microtubul  | microtubul   | intracellula |
| GI_18104963-A | 255.4  | 326.2  | 332.3  | CAPS      | <a href="#">NM_080590.1</a> | CAPS1                                 | calcium     |              | intracellula |
| GI_18104965-I | 125.5  | 162    | 142.9  | CAPS      | <a href="#">NM_004058.2</a> | CAPS1                                 | calcium     |              | intracellula |
| GI_18104966-I | 107.6  | 123.2  | 107.7  | PTGS1     | <a href="#">NM_000962.2</a> | COX1;COX3;PHS1;PCOX1;PGHS1;PTGHS;     | prostaglan  | membran      | physiologi   |
| GI_18104968-A | 202    | 418.3  | 161.5  | PTGS1     | <a href="#">NM_080591.1</a> | COX1;COX3;PHS1;PCOX1;PGHS1;PTGHS;     | prostaglan  | membran      | physiologi   |
| GI_18104972-A | 837.8  | 916.5  | 725    | PTP4A2    | <a href="#">NM_080392.1</a> | HH13;OV-1;PRL2;HH7-2;PRL-2;PTP4A;HU-  | protein     |              |              |
| GI_18104974-I | 2145.4 | 1902   | 1741.3 | PTP4A2    | <a href="#">NM_003479.2</a> | HH13;OV-1;PRL2;HH7-2;PRL-2;PTP4A;HU-  | protein     |              |              |
| GI_18104975-S | 636.9  | 477.1  | 348.6  | PTPLA     | <a href="#">NM_014241.2</a> |                                       | protein     |              | signal       |

|               |         |        |        |           |                             |                                       |              |             |              |
|---------------|---------|--------|--------|-----------|-----------------------------|---------------------------------------|--------------|-------------|--------------|
| GI_18104977-S | 1547.4  | 2294.3 | 1783.5 | PTPN1     | <a href="#">NM_002827.2</a> | PTP1B                                 | protein      | soluble     | signal       |
| GI_18104978-I | 398.2   | 541.2  | 427    | PTPN2     | <a href="#">NM_002828.2</a> | PTPT;TCPTP;TC-PTP;TCELLPTP            | protein      |             | protein      |
| GI_18104981-A | 383.5   | 339.2  | 256    | PTPN2     | <a href="#">NM_080423.1</a> | PTPT;TCPTP;TC-PTP;TCELLPTP            | protein      |             | protein      |
| GI_18104985-S | 192.5   | 232.3  | 183.9  | PTPN3     | <a href="#">NM_002829.2</a> | PTPH1                                 | structural   | cytoskelet  | protein      |
| GI_18104987-S | 215.7   | 266.1  | 255.7  | PTPN4     | <a href="#">NM_002830.2</a> | PTPMEG;PTPMEG1                        | non-         | cytoskelet  | protein      |
| GI_18104994-A | 488.9   | 869.8  | 791.2  | AP1G2     | <a href="#">NM_003917.2</a> | G2AD                                  | protein      | Golgi       | nonselecti   |
| GI_18104995-I | 160.5   | 178.3  | 161.9  | AP1G2     | <a href="#">NM_080545.1</a> | G2AD                                  | protein      | Golgi       | nonselecti   |
| GI_18105001-A | 128.4   | 133.8  | 119.6  | AP1GBP1   | <a href="#">NM_080551.1</a> | SYNG                                  |              | secretory   | intracellula |
| GI_18105001-I | 125.3   | 145.9  | 132    | AP1GBP1   | <a href="#">NM_080551.1</a> | SYNG                                  |              | secretory   | intracellula |
| GI_18105005-S | 465     | 510.6  | 622    | AP1M1     | <a href="#">NM_032493.2</a> | AP47;CLTNM;MU-1A;CLAPM2               | protein      | coated pit  | endocytosi   |
| GI_18105006-S | 259.8   | 221    | 217.7  | CAD       | <a href="#">NM_004341.2</a> |                                       | carbamoyl-   | cytoplasm   | 'de novo'    |
| GI_18105008-S | 3166.1  | 2770.9 | 2357.9 | CAMLG     | <a href="#">NM_001745.2</a> | CAML                                  |              | integral to | defense      |
| GI_18105009-S | 166.5   | 184.6  | 165    | 2-Apr     | <a href="#">NM_014318.2</a> |                                       |              |             | apoptosis    |
| GI_18105011-I | 393.6   | 417.6  | 438.8  | 3-Apr     | <a href="#">NM_016085.2</a> | p18;HSPC013                           |              |             |              |
| GI_18105013-A | 5174.2  | 4952.1 | 5072.1 | 3-Apr     | <a href="#">NM_080592.1</a> | p18;HSPC013                           |              |             |              |
| GI_18105017-I | 112.5   | 115.5  | 116.5  | COLQ      | <a href="#">NM_080538.1</a> | EAD                                   | DNA          | basal       | acetylcholi  |
| GI_18105025-I | 139.8   | 150.6  | 147.3  | COLQ      | <a href="#">NM_080542.1</a> | EAD                                   | DNA          | basal       | acetylcholi  |
| GI_18105029-A | 125.4   | 177.3  | 127.6  | COLQ      | <a href="#">NM_080544.1</a> | EAD                                   | DNA          | basal       | acetylcholi  |
| GI_18105031-S | 141.6   | 149.6  | 136.8  | COL10A1   | <a href="#">NM_000493.2</a> |                                       | collagen     | collagen    | skeletal     |
| GI_18105033-S | 95.4    | 122.9  | 108.7  | COLEC10   | <a href="#">NM_006438.2</a> | CLL1                                  | lectin [goid | cytoplasm   |              |
| GI_18105034-S | 93.2    | 96     | 100.4  | COX7A1    | <a href="#">NM_001864.2</a> | COX7A;COX7AH;COX7AM                   | cytochrom    | inner       | energy       |
| GI_18105035-S | 3839.5  | 5180.1 | 4292.7 | COX7A2    | <a href="#">NM_001865.2</a> | COX7AL;COX7AL1;COXVIIa-L              | aa3-type     | inner       | electron     |
| GI_18105036-S | 3135.4  | 3053   | 2624.9 | COX7A2L   | <a href="#">NM_004718.2</a> | EB1;SIG81;COX7AR;COX7RP               | cytochrom    | mitochond   | electron     |
| GI_18105038-S | 4706.1  | 7407.6 | 5482.4 | COX7B     | <a href="#">NM_001866.2</a> |                                       | cytochrom    | mitochond   |              |
| GI_18105039-S | 11696.8 | 12412  | 10785  | COX7C     | <a href="#">NM_001867.2</a> |                                       | aa3-type     | mitochond   | energy       |
| GI_18105040-I | 102.1   | 106.4  | 96.9   | GAB2      | <a href="#">NM_012296.2</a> | KIAA0571                              |              |             |              |
| GI_18105041-A | 781.3   | 514.7  | 437.2  | GAB2      | <a href="#">NM_080491.1</a> | KIAA0571                              |              |             |              |
| GI_18105041-I | 112.1   | 113.1  | 101.8  | GAB2      | <a href="#">NM_080491.1</a> | KIAA0571                              |              |             |              |
| GI_18105044-S | 459.9   | 677.5  | 775    | HIST1H2AH | <a href="#">NM_080596.1</a> | H2A/S;H2AFALii;dJ86C11.1              | DNA          | nucleus     | nucleoso     |
| GI_18105047-S | 5106.9  | 7187.7 | 6409.6 | HIST1H2BK | <a href="#">NM_080593.1</a> | H2B/S;H2BFT;H2BFAiii                  | DNA          | chromoso    | nucleoso     |
| GI_18105049-S | 100.7   | 108.6  | 104.4  | DES       | <a href="#">NM_001927.2</a> | CSM1;CSM2;CMD1I;FLJ12025              | structural   | intermedia  | regulation   |
| GI_18105051-S | 140.5   | 170.2  | 153.2  | MAGEH1    | <a href="#">NM_014061.3</a> |                                       |              | 1-Apr       | apoptosis    |
| GI_18105052-S | 2065.3  | 1791.3 | 1565.8 | RAE1      | <a href="#">NM_003610.2</a> | MRNP41;Mnrp41;FLJ30608;dJ481F12.3;dJ8 | RNA          | nuclear     | mRNA-        |
| GI_18105053-S | 445.4   | 480.7  | 492.3  | KIFAP3    | <a href="#">NM_014970.2</a> | KAP3;SMAP;Smg GDS;Smg-                | molecular    | endoplas    | signal       |
| GI_18105057-S | 440.5   | 497.2  | 567.3  | VPS33B    | <a href="#">NM_018668.2</a> | FLJ14848                              | protein      | membran     | protein      |
| GI_18105059-I | 227.1   | 261.6  | 243.8  | VPS41     | <a href="#">NM_014396.2</a> | HVSP41                                |              |             |              |
| GI_18105060-A | 751.2   | 777.6  | 714.3  | VPS41     | <a href="#">NM_080631.1</a> | HVSP41                                |              |             |              |
| GI_18105062-S | 661.3   | 808.1  | 695.4  | VPS45A    | <a href="#">NM_007259.2</a> | H1;VPS45;VSP45;VPS45B;VSP45A;H1VPS4   | protein      | Golgi       | intracellula |
| GI_18105064-S | 194.5   | 214.7  | 196.5  | VN1R1     | <a href="#">NM_020633.2</a> | V1RL1;ZVNH1;ZVNR1;VNR1911             |              |             |              |
| GI_18105065-S | 97.6    | 111.1  | 109    | HIST1H4I  | <a href="#">NM_003495.2</a> | H4M;H4/m;H4FM                         |              |             |              |
| GI_18129625-S | 95.8    | 101.5  | 92.9   | MGC4473   | <a href="#">NM_080719.1</a> |                                       |              |             |              |
| GI_18129633-S | 193.9   | 229.3  | 223.1  | C20orf86  | <a href="#">NM_080674.1</a> | ba196N14.3                            |              |             |              |
| GI_18129689-S | 115     | 113.1  | 106.7  | TBX4      | <a href="#">NM_018488.2</a> |                                       | transcripti  | nucleus     | regulation   |
| GI_18139548-S | 170.3   | 181.1  | 169.3  | SET7      | <a href="#">NM_030648.1</a> | SET9;FLJ21193;KIAA1717                | methyltran   | nucleus     | chromatin    |

|               |        |        |        |           |                             |                                    |             |             |              |
|---------------|--------|--------|--------|-----------|-----------------------------|------------------------------------|-------------|-------------|--------------|
| GI_18141296-I | 82.4   | 87.5   | 90     | SCRIB     | <a href="#">NM_015356.1</a> | CRIB1;SCRB1;SCRIB1;Vartul;KIAA0147 | protein     |             | intracellula |
| GI_18141306-S | 4742.5 | 4962.6 | 4144.3 | SLC7A11   | <a href="#">NM_014331.2</a> | xCT;CCBR1                          | cystine:glu | integral to | protein      |
| GI_18141314-S | 112.6  | 110    | 111.9  | EDG8      | <a href="#">NM_030760.2</a> | S1P5;Edg-8;SPPR-1;SPPR-2           |             |             |              |
| GI_18141315-S | 314.1  | 335.5  | 329.6  | SSB1      | <a href="#">NM_025106.2</a> | FLJ22393                           |             |             | intracellula |
| GI_18141577-A | 481.5  | 551.7  | 515.4  | EGLN2     | <a href="#">NM_080732.1</a> | EIT6;PHD1;HIFPH1;DKFZp434E026      |             |             |              |
| GI_18152766-S | 230.6  | 236.9  | 253    | SYTL4     | <a href="#">NM_080737.1</a> |                                    | transporte  | membran     | transport    |
| GI_18152772-S | 121.3  | 128.3  | 123.8  | NEU4      | <a href="#">NM_080741.1</a> | MGC18222                           | exo-alpha-  |             | carbohydr    |
| GI_18152774-S | 92.3   | 91.2   | 113.7  | B3GAT2    | <a href="#">NM_080742.1</a> | GLCATS;GlcAT-S;KIAA1963;bA156114.1 | galactosyl  | Golgi       | carbohydr    |
| GI_18152778-S | 450.4  | 1202.3 | 218.4  | SRCRB4D   | <a href="#">NM_080744.1</a> | S4D-SRCRB;SRCRB-S4D                |             |             |              |
| GI_18152784-S | 4503.1 | 6034.9 | 6996.2 | C20orf52  | <a href="#">NM_080748.1</a> | bA353C18.2                         |             | integral to |              |
| GI_18152788-S | 215.4  | 265.5  | 260.2  | ZSWIM3    | <a href="#">NM_080752.1</a> | FLJ32079;C20orf164;dJ337O18.7      |             |             |              |
| GI_18201869-S | 93.3   | 92.7   | 86.1   | GPR82     | <a href="#">NM_080817.1</a> |                                    | rhodopsin-  | integral to | G-protein    |
| GI_18201877-S | 396.9  | 473.5  | 640.1  | C20orf108 | <a href="#">NM_080821.1</a> | 5A3;dJ1167H4.1;DKFZP434A1114       |             | integral to |              |
| GI_18201879-S | 240.5  | 320.6  | 310.4  | OVCA2     | <a href="#">NM_080822.1</a> |                                    |             |             |              |
| GI_18201883-S | 100.6  | 97.4   | 87.6   | C20orf173 | <a href="#">NM_080828.1</a> | FLJ25360;dJ477O4.4                 |             |             |              |
| GI_18201885-S | 132.9  | 139.9  | 143.8  | C20orf175 | <a href="#">NM_080829.1</a> | FLJ32230;dJ530I15.2                | chemokin    | extracellul | immune       |
| GI_18201887-S | 92.1   | 79.2   | 80.6   | PABPC5    | <a href="#">NM_080832.1</a> | PABP5                              | RNA         |             |              |
| GI_18201889-S | 134.9  | 131.8  | 128    | C20orf152 | <a href="#">NM_080834.1</a> | dJ954P9.1                          |             |             |              |
| GI_18201895-A | 111.9  | 128.2  | 114.8  | TBX5      | <a href="#">NM_080718.1</a> | HOS                                | RNA         |             | heart        |
| GI_18201897-A | 153.6  | 146.7  | 157.6  | TBX6      | <a href="#">NM_080758.1</a> |                                    | DNA         |             | mesoderm     |
| GI_18201897-I | 343.9  | 406    | 382    | TBX6      | <a href="#">NM_080758.1</a> |                                    | DNA         |             | mesoderm     |
| GI_18201899-I | 276.6  | 362.1  | 319.6  | TBX6      | <a href="#">NM_004608.2</a> |                                    | DNA         |             | mesoderm     |
| GI_18201901-S | 1794.4 | 1629.8 | 1272.3 | HARSL     | <a href="#">NM_012208.2</a> | HO3;HARSR                          | ATP         | cytoplasm   | histidyl-    |
| GI_18201902-S | 3449.8 | 4514.1 | 3997.1 | HARS      | <a href="#">NM_002109.3</a> | HRS;FLJ20491                       | ATP         | cytoplasm   | histidyl-    |
| GI_18201903-S | 183.8  | 193.8  | 182.6  | EPHA8     | <a href="#">NM_020526.2</a> | EEK;HEK3;KIAA1459                  | signal      | integral to | protein      |
| GI_18201904-S | 4176.7 | 4539.8 | 3851.8 | GPI       | <a href="#">NM_000175.2</a> | AMF;NLK;PGI;PHI;GNPI;SA-36         | cytokine    |             | hemostasi    |
| GI_18201906-S | 1196   | 1755.5 | 1241.3 | PRAME     | <a href="#">NM_006115.2</a> | MAPE;OIP4                          | tumor       |             |              |
| GI_18201907-I | 223.5  | 235.6  | 199.4  | VCAM1     | <a href="#">NM_001078.2</a> | INCAM-100                          | cell        | integral to | cell-cell    |
| GI_18201908-A | 93.1   | 96.7   | 108.6  | VCAM1     | <a href="#">NM_080682.1</a> | INCAM-100                          | cell        | integral to | cell-cell    |
| GI_18201910-S | 93.5   | 103.5  | 96.3   | VTN       | <a href="#">NM_000638.2</a> | V75;VNT                            | cell        | extracellul | cell         |
| GI_18201912-S | 148.2  | 198.1  | 175.8  | FOXP1     | <a href="#">NM_003593.2</a> | WHN;FKHL20                         | specific    | nucleus     | epidermal    |
| GI_18201914-A | 128.3  | 155.9  | 132.3  | COL11A2   | <a href="#">NM_080679.1</a> | HKE5;PARP;STL3;DFNA13              | collagen    | collagen    | skeletal     |
| GI_18201916-I | 141.7  | 168    | 154.2  | COL11A2   | <a href="#">NM_080680.1</a> | HKE5;PARP;STL3;DFNA13              | collagen    | collagen    | skeletal     |
| GI_18201920-A | 147.8  | 317.7  | 332.3  | COL12A1   | <a href="#">NM_080645.1</a> | COL12A1L;BA209D8.1;DJ234P15.1      | collagen    | collagen    | skeletal     |
| GI_18201922-I | 103.9  | 104.4  | 97.4   | COL12A1   | <a href="#">NM_004370.4</a> | COL12A1L;BA209D8.1;DJ234P15.1      | collagen    | collagen    | skeletal     |
| GI_18254455-S | 125.7  | 142.7  | 131    | TSGA2     | <a href="#">NM_080860.1</a> | FLJ32753                           |             |             | meiosis      |
| GI_18254459-S | 98.4   | 114.8  | 96.4   | SSB4      | <a href="#">NM_080862.1</a> | SSB-4                              |             |             | intracellula |
| GI_18254463-S | 109.8  | 102.4  | 102.7  | RLN3      | <a href="#">NM_080864.1</a> | H3;RXN3;ZINS4;insl7                | hormone     | extracellul | physiologi   |
| GI_18254471-S | 160.3  | 176.6  | 172.4  | UNC5D     | <a href="#">NM_080872.1</a> | Unc5h4;KIAA1777                    | serpin      |             | signal       |
| GI_18254473-S | 101.5  | 104.8  | 95.7   | ASB11     | <a href="#">NM_080873.1</a> |                                    |             |             | intracellula |
| GI_18266677-S | 85.6   | 82.3   | 83.6   | LOC129026 | <a href="#">NM_080842.1</a> |                                    |             |             |              |
| GI_18373304-S | 205.4  | 206.7  | 213    | ARRDC2    | <a href="#">NM_015683.1</a> | PP2703;CLONE24945                  |             |             | sensory      |
| GI_18373307-S | 2087.9 | 1937.8 | 2290.7 | RAB40C    | <a href="#">NM_021168.1</a> | RARL;RASL8C                        | GTP         |             | protein      |
| GI_18373330-S | 110.2  | 122.9  | 100.4  | RAB40A    | <a href="#">NM_080879.1</a> | RAR2A;Rar-2;FLJ32297               | GTP         |             | protein      |

|               |        |        |        |         |                             |                                    |            |              |              |
|---------------|--------|--------|--------|---------|-----------------------------|------------------------------------|------------|--------------|--------------|
| GI_18373333-S | 924.9  | 981.7  | 964.3  | TMEM14B | <a href="#">NM_030969.2</a> | MGC1223                            | molecular  | integral to  |              |
| GI_18375500-I | 721.9  | 826.8  | 703.6  | APEX1   | <a href="#">NM_001641.2</a> | APE;APX;APE1;APEN;APEX;HAP1;REF1;R | DNA-       | obsolete     | base-        |
| GI_18375502-A | 4563.4 | 5167.2 | 4510.7 | APEX1   | <a href="#">NM_080648.1</a> | APE;APX;APE1;APEN;APEX;HAP1;REF1;R | DNA-       | obsolete     | base-        |
| GI_18375506-S | 825.7  | 822.5  | 975.8  | APEX2   | <a href="#">NM_014481.2</a> | APE2;XTH2;APEXL2                   | endonucle  |              | DNA          |
| GI_18375508-S | 405    | 524.7  | 210.6  | APXL    | <a href="#">NM_001649.2</a> | HSAPXL                             | amiloride- |              | intracellula |
| GI_18375514-S | 174.5  | 206.9  | 166.7  | APCS    | <a href="#">NM_001639.2</a> | SAP;PTX2                           | amyloid    | extracellul  | protein      |
| GI_18375515-A | 316    | 367.7  | 339.7  | ACPT    | <a href="#">NM_080791.1</a> |                                    |            |              |              |
| GI_18375517-I | 109.7  | 112.3  | 107.4  | COL11A1 | <a href="#">NM_001854.2</a> | STL2;COLL6                         | collagen   | collagen     | cartilage    |
| GI_18375519-I | 97.9   | 97.4   | 82.2   | COL11A1 | <a href="#">NM_080629.1</a> | STL2;COLL6                         | collagen   | collagen     | cartilage    |
| GI_18375521-A | 106.9  | 118    | 116.6  | COL11A1 | <a href="#">NM_080630.1</a> | STL2;COLL6                         | collagen   | collagen     | cartilage    |
| GI_18375523-I | 194.9  | 151.4  | 187.3  | UPF3A   | <a href="#">NM_023011.2</a> | UPF3;HUPF3A;RENT3A                 | nucleocyto | cytoplasm    | mRNA         |
| GI_18375524-A | 749.9  | 604.3  | 626.5  | UPF3A   | <a href="#">NM_080687.1</a> | UPF3;HUPF3A;RENT3A                 | nucleocyto | cytoplasm    | mRNA         |
| GI_18375526-A | 384.6  | 313.9  | 259.4  | UPF3B   | <a href="#">NM_023010.2</a> | UPF3X;HUPF3B;RENT3B                |            |              |              |
| GI_18375529-I | 197.6  | 253.7  | 218    | TREX1   | <a href="#">NM_016381.2</a> | DRN3;ATRIP;FLJ12343;DKFZp434J0310  | 3'-5'      |              | DNA          |
| GI_18375534-A | 365.4  | 330.8  | 381.1  | TREX1   | <a href="#">NM_033629.1</a> | DRN3;ATRIP;FLJ12343;DKFZp434J0310  | 3'-5'      |              | DNA          |
| GI_18375536-I | 191.3  | 211.1  | 217.8  | TREX2   | <a href="#">NM_007205.2</a> | UIP1;XQ28ORF                       | 3'-5'      |              | DNA          |
| GI_18375537-A | 946.4  | 777    | 747.6  | TREX2   | <a href="#">NM_017518.3</a> | UIP1;XQ28ORF                       | 3'-5'      |              | DNA          |
| GI_18375537-I | 597.4  | 484.9  | 460.3  | TREX2   | <a href="#">NM_017518.3</a> | UIP1;XQ28ORF                       | 3'-5'      |              | DNA          |
| GI_18375604-I | 649.9  | 838.5  | 1005.8 | TBX3    | <a href="#">NM_016569.2</a> | UMS;XHL;TBX3-ISO                   | RNA        | nucleus      | skeletal     |
| GI_18375606-A | 132.8  | 153.5  | 169.1  | TBX3    | <a href="#">NM_005996.2</a> | UMS;XHL;TBX3-ISO                   | RNA        | nucleus      | skeletal     |
| GI_18375606-I | 238.1  | 275.9  | 239.7  | TBX3    | <a href="#">NM_005996.2</a> | UMS;XHL;TBX3-ISO                   | RNA        | nucleus      | skeletal     |
| GI_18375608-A | 124    | 115.4  | 103.3  | DACH    | <a href="#">NM_004392.2</a> | DACH1;FLJ10138                     |            | nucleus      | eye          |
| GI_18375610-I | 336.6  | 413.2  | 373.9  | DACH    | <a href="#">NM_080759.1</a> | DACH1;FLJ10138                     |            | nucleus      | eye          |
| GI_18375616-I | 105    | 101.8  | 105.6  | DATF1   | <a href="#">NM_022105.2</a> | DIO1;FLJ11265;KIAA0333             | DNA        | nucleus      | transcripti  |
| GI_18375618-I | 91.9   | 117.8  | 103.7  | DATF1   | <a href="#">NM_080796.1</a> | DIO1;FLJ11265;KIAA0333             | DNA        | nucleus      | transcripti  |
| GI_18375620-A | 273.5  | 501    | 893.9  | DATF1   | <a href="#">NM_080797.1</a> | DIO1;FLJ11265;KIAA0333             | DNA        | nucleus      | transcripti  |
| GI_18375627-A | 798.8  | 779.4  | 695.2  | BAT2    | <a href="#">NM_004638.2</a> | G2;D6S51;D6S51E                    | MHC-       |              |              |
| GI_18375629-A | 1088.1 | 1381.3 | 1204.4 | BAT3    | <a href="#">NM_080702.1</a> | G3;D6S52E                          | MHC-       |              |              |
| GI_18375635-S | 274.2  | 309.6  | 291.5  | BAT4    | <a href="#">NM_033177.2</a> | G5;D6S54E                          | nucleic    | intracellula |              |
| GI_18375636-I | 135.1  | 152.5  | 133.7  | BAT8    | <a href="#">NM_006709.2</a> | G9A;NG36;NG36/G9a                  | methyltran | nucleus      | chromatin    |
| GI_18375640-S | 108.1  | 113.7  | 108    | BATF    | <a href="#">NM_006399.2</a> | B-ATF;SFA-2                        | RNA        | nucleus      | antimicrob   |
| GI_18375647-A | 386.1  | 450    | 336.5  | PTPN13  | <a href="#">NM_080684.1</a> | PNP1;FAP-1;PTP1E;PTPL1;PTPLE;PTP-  | non-       | kinesin      | protein      |
| GI_18375651-S | 1207.5 | 878.7  | 1029.5 | PTPN12  | <a href="#">NM_002835.2</a> | PTPG1;PTP-PEST                     | tumor      | soluble      | protein      |
| GI_18375654-S | 174.2  | 200.4  | 191.3  | PTPN18  | <a href="#">NM_014369.2</a> | BDP1                               | non-       |              | protein      |
| GI_18375656-S | 163.3  | 177.6  | 152.1  | PTPN21  | <a href="#">NM_007039.2</a> | PTPD1;PTPRL10                      | protein    | peripheral   | protein      |
| GI_18375659-I | 115.2  | 134.7  | 116.7  | PTPN7   | <a href="#">NM_080588.1</a> | LPTP;HEPTP;PTPNI;BPTP-4;LC-PTP     | protein    | cytoplasm    | protein      |
| GI_18375661-A | 269.8  | 332.3  | 291.1  | PTPN7   | <a href="#">NM_080589.1</a> | LPTP;HEPTP;PTPNI;BPTP-4;LC-PTP     | protein    | cytoplasm    | protein      |
| GI_18375663-S | 434.2  | 544.6  | 449.9  | PTPN9   | <a href="#">NM_002833.2</a> | MEG2                               | non-       | intracellula | protein      |
| GI_18375664-A | 188.5  | 219.7  | 213    | TRPV1   | <a href="#">NM_018727.3</a> | VR1;DKFZp434K0220                  | calcium    | integral to  | chemosen     |
| GI_18375664-I | 132.6  | 144.1  | 126.2  | TRPV1   | <a href="#">NM_018727.3</a> | VR1;DKFZp434K0220                  | calcium    | integral to  | chemosen     |
| GI_18375666-I | 88.1   | 94.9   | 99.3   | TRPV1   | <a href="#">NM_080704.1</a> | VR1;DKFZp434K0220                  | calcium    | integral to  | chemosen     |
| GI_18375668-I | 82     | 90.6   | 82.9   | TRPV1   | <a href="#">NM_080705.1</a> | VR1;DKFZp434K0220                  | calcium    | integral to  | chemosen     |
| GI_18375670-I | 98.3   | 108    | 90.5   | TRPV1   | <a href="#">NM_080706.1</a> | VR1;DKFZp434K0220                  | calcium    | integral to  | chemosen     |
| GI_18375672-S | 482.2  | 540    | 447.5  | RENT1   | <a href="#">NM_002911.2</a> | UPF1;HUPF1;NORF1;pNORF1;KIAA0221   | helicase   | cytoplasm    | mRNA         |

|               |         |        |        |             |                             |                                   |             |             |              |
|---------------|---------|--------|--------|-------------|-----------------------------|-----------------------------------|-------------|-------------|--------------|
| GI_18375674-A | 1681.9  | 1300.4 | 1203.7 | UPF2        | <a href="#">NM_015542.2</a> | HUPF2;RENT2;KIAA1408;DKFZP434D222 | RNA         |             | protein      |
| GI_18375674-I | 158.8   | 163.6  | 168    | UPF2        | <a href="#">NM_015542.2</a> | HUPF2;RENT2;KIAA1408;DKFZP434D222 | RNA         |             | protein      |
| GI_18375675-I | 100.7   | 104.4  | 96.4   | UPF2        | <a href="#">NM_080599.1</a> | HUPF2;RENT2;KIAA1408;DKFZP434D222 | RNA         |             | protein      |
| GI_18375679-S | 3089.3  | 3333.1 | 3281.3 | WBP11       | <a href="#">NM_016312.2</a> | NPWBP                             | single-     | nucleus     | regulation   |
| GI_18375680-S | 104.5   | 97.9   | 92.4   | WBSCR23     | <a href="#">NM_025042.2</a> | FLJ22367                          |             |             |              |
| GI_18378730-S | 855.2   | 995.5  | 1036.3 | BBX         | <a href="#">NM_020235.2</a> | MDS001                            |             |             |              |
| GI_18378734-S | 238.8   | 232.4  | 182    | CAP350      | <a href="#">NM_014810.2</a> | KIAA0480                          |             |             |              |
| GI_18379326-S | 1026    | 1039.4 | 868.7  | RNUT1       | <a href="#">NM_005701.2</a> | KPNBL                             | snRNA       | nuclear     | nucleocyto   |
| GI_18379329-I | 99.6    | 112.5  | 106.5  | WAC         | <a href="#">NM_100264.1</a> | Wwp4;BM-                          |             |             |              |
| GI_18379331-A | 2487    | 2032.8 | 1665.9 | WAC         | <a href="#">NM_100486.1</a> | Wwp4;BM-                          |             |             |              |
| GI_18379333-A | 1961.1  | 1820.1 | 1831.5 | RNPS1       | <a href="#">NM_080594.1</a> | E5.1                              | RNA         | nucleus     | RNA          |
| GI_18379335-I | 126.5   | 142    | 126.2  | RNPS1       | <a href="#">NM_006711.2</a> | E5.1                              | RNA         | nucleus     | RNA          |
| GI_18379336-I | 264.6   | 326.5  | 273.1  | VPS52       | <a href="#">NM_080564.1</a> | ARE1;SAC2;ARE-1;SACM2L;RP5-       | vesicle     |             | nonselecti   |
| GI_18379338-S | 167.5   | 207.8  | 202.2  | IL27RA      | <a href="#">NM_004843.2</a> | CRL1;TCCR;WSX1;IL27R;zcytor1      | transmem    | integral to | cell         |
| GI_18379339-A | 855     | 893.8  | 834.5  | VPS52       | <a href="#">NM_022553.3</a> | ARE1;SAC2;ARE-1;SACM2L;RP5-       | vesicle     |             | nonselecti   |
| GI_18379341-S | 208     | 136.3  | 139.9  | SORCS1      | <a href="#">NM_052918.2</a> | BA446H13.1                        |             | integral to |              |
| GI_18379343-S | 111.3   | 101.9  | 105.3  | SORCS2      | <a href="#">NM_020777.1</a> | KIAA1329                          | protein     | integral to | intracellula |
| GI_18379345-S | 138.2   | 156.9  | 137.3  | SORCS3      | <a href="#">NM_014978.1</a> | SORCS;KIAA1059                    | protein     | integral to | intracellula |
| GI_18379347-S | 144.7   | 134.4  | 127.9  | SORL1       | <a href="#">NM_003105.3</a> | LR11;LRP9;SORLA;gp250;SorLA-1     | internaliza | integral to | receptor     |
| GI_18379348-S | 282.8   | 318.8  | 340.3  | VAT1        | <a href="#">NM_006373.2</a> | VATI;FLJ20230                     |             | synaptic    |              |
| GI_18379350-S | 110.1   | 117.6  | 104.4  | VPREB1      | <a href="#">NM_007128.2</a> | IGI;IGVPB;VPREB                   | antigen     | extracellul | immune       |
| GI_18379351-S | 329.8   | 356.1  | 327.5  | WDFY2       | <a href="#">NM_052950.2</a> | WDF2;ZFYVE22                      | zinc ion    |             | electron     |
| GI_18379352-S | 180.6   | 205.2  | 185.4  | WFDC1       | <a href="#">NM_021197.2</a> | PS20                              | molecular   | extracellul | negative     |
| GI_18379354-S | 93.4    | 104    | 85.8   | WIF1        | <a href="#">NM_007191.2</a> | WIF-1                             | protein-    |             | signal       |
| GI_18379355-I | 113.9   | 107.4  | 108.8  | WFDC2       | <a href="#">NM_080733.1</a> | HE4;WAP5;dJ461P17.6               | endopepti   | extracellul | proteolysis  |
| GI_18379359-I | 223.6   | 280.9  | 250.2  | WFDC2       | <a href="#">NM_080735.1</a> | HE4;WAP5;dJ461P17.6               | endopepti   | extracellul | proteolysis  |
| GI_18379361-A | 162.6   | 184.2  | 162.4  | WFDC2       | <a href="#">NM_080736.1</a> | HE4;WAP5;dJ461P17.6               | endopepti   | extracellul | proteolysis  |
| GI_18379361-I | 102.6   | 119.7  | 97.3   | WFDC2       | <a href="#">NM_080736.1</a> | HE4;WAP5;dJ461P17.6               | endopepti   | extracellul | proteolysis  |
| GI_18379365-S | 2035.9  | 2420.2 | 2901.3 | ZMPSTE24    | <a href="#">NM_005857.2</a> | STE24;FACE-1;Ste24p;FLJ14968      | metalloex   | Golgi       | proteolysis  |
| GI_18390318-S | 160.2   | 179.5  | 172.6  | DKFZp564119 | <a href="#">NM_015419.1</a> |                                   | vascular    |             | protein      |
| GI_18390348-S | 23194.2 | 22454  | 18813  | RPL7A       | <a href="#">NM_000972.2</a> | TRUP;SURF3                        | structural  | cytosolic   | protein      |
| GI_18426870-S | 400.3   | 235.7  | 126.6  | ASGR1       | <a href="#">NM_001671.2</a> | ASGPR;Hs.12056                    | asialoglyc  | integral to | receptor     |
| GI_18426872-I | 143.3   | 165    | 154    | ASGR2       | <a href="#">NM_080912.1</a> | L-H2;ASGP-R;Hs.1259               | asialoglyc  | integral to | cell         |
| GI_18426876-A | 93.8    | 106.8  | 93.8   | ASGR2       | <a href="#">NM_080914.1</a> | L-H2;ASGP-R;Hs.1259               | asialoglyc  | integral to | cell         |
| GI_18426878-A | 478.1   | 558.9  | 545.4  | BAT8        | <a href="#">NM_025256.4</a> | G9A;NG36;NG36/G9a                 | methyltran  | nucleus     | chromatin    |
| GI_18426887-S | 212.7   | 271.5  | 209.8  | LOC91219    | <a href="#">NM_080924.1</a> |                                   |             |             |              |
| GI_18426889-S | 641.1   | 632.5  | 587.8  | LOC96610    | <a href="#">NM_080926.1</a> |                                   |             |             |              |
| GI_18426895-S | 971.7   | 1388.7 | 1315.9 | DCTN6       | <a href="#">NM_006571.2</a> | WS-3                              | cell        | dynactin    | mitochond    |
| GI_18426897-I | 103.4   | 90.6   | 93.3   | GNAS        | <a href="#">NM_080425.1</a> | AHO;GSA;GSP;POH;GPSA;NESP;GNAS1;P | heterotrim  | peripheral  | Golgi to     |
| GI_18426899-A | 8285.8  | 9799.6 | 9910.3 | GNAS        | <a href="#">NM_080426.1</a> | AHO;GSA;GSP;POH;GPSA;NESP;GNAS1;P | heterotrim  | peripheral  | Golgi to     |
| GI_18426901-I | 288.5   | 334.8  | 255.9  | WRNIP1      | <a href="#">NM_020135.2</a> | WHIP;FLJ22526;bA420G6.2           |             |             |              |
| GI_18426903-A | 1829.9  | 1978.2 | 1398.6 | WRNIP1      | <a href="#">NM_130395.1</a> | WHIP;FLJ22526;bA420G6.2           |             |             |              |
| GI_18426905-S | 89.8    | 114.9  | 90.8   | DBH         | <a href="#">NM_000787.2</a> |                                   | catalytic   | soluble     | synaptic     |
| GI_18426907-I | 98      | 114.9  | 100.8  | SIRPB2      | <a href="#">NM_018556.2</a> | SIRP-B2;bA77C3.1                  |             | integral to | negative     |



|               |         |        |        |            |                             |                                         |              |             |              |
|---------------|---------|--------|--------|------------|-----------------------------|-----------------------------------------|--------------|-------------|--------------|
| GI_18426908-A | 184.5   | 253.2  | 191.9  | SIRPB2     | <a href="#">NM_080816.1</a> | SIRP-B2;bA77C3.1                        |              | integral to | negative     |
| GI_18426910-S | 1144.5  | 1317.4 | 321.2  | PTPNS1     | <a href="#">NM_080792.1</a> | BIT;MFR;P84;SIRP;MYD-1;SHPS1;SHPS-      | receptor     | plasma      | cell         |
| GI_18426912-I | 460.3   | 569.4  | 483.5  | DBN1       | <a href="#">NM_080881.1</a> | D0S117E;DKFZp434D064                    | actin        | actin       |              |
| GI_18426914-A | 2454.4  | 2785.4 | 1798.4 | DBN1       | <a href="#">NM_004395.2</a> | D0S117E;DKFZp434D064                    | actin        | actin       |              |
| GI_18426914-I | 98.2    | 116.1  | 99.2   | DBN1       | <a href="#">NM_004395.2</a> | D0S117E;DKFZp434D064                    | actin        | actin       |              |
| GI_18426962-A | 4391.1  | 4363.3 | 3856.8 | DGUOK      | <a href="#">NM_001929.2</a> | DGK                                     | deoxygua     | mitochond   | guanosine    |
| GI_18426964-I | 160.6   | 169.7  | 152.2  | DGUOK      | <a href="#">NM_080915.1</a> | DGK                                     | deoxygua     | mitochond   | guanosine    |
| GI_18426972-S | 1659.4  | 1805.8 | 1450.5 | DRAP1      | <a href="#">NM_006442.2</a> | NC2-alpha                               | transcripti  |             | negative     |
| GI_18426974-S | 187.8   | 225.4  | 202.9  | HLA-DQA1   | <a href="#">NM_002122.2</a> | DQA1;HLA-DQ;CELIAC1;HLA-DQA             | class II     | integral to | pathogene    |
| GI_18450368-I | 90.2    | 91.1   | 84     | PTPRA      | <a href="#">NM_080840.1</a> | LRP;HLPR;PTPA;HEPTP;HPTPA;RPTPA;PT      | transmem     | integral to | protein      |
| GI_18450370-A | 1003.9  | 898.8  | 546.7  | PTPRA      | <a href="#">NM_080841.1</a> | LRP;HLPR;PTPA;HEPTP;HPTPA;RPTPA;PT      | transmem     | integral to | protein      |
| GI_18450370-I | 313.9   | 394    | 338.1  | PTPRA      | <a href="#">NM_080841.1</a> | LRP;HLPR;PTPA;HEPTP;HPTPA;RPTPA;PT      | transmem     | integral to | protein      |
| GI_18482382-S | 98.6    | 121.8  | 127    | KLHL6      | <a href="#">NM_130446.1</a> | FLJ00029                                | protein      |             |              |
| GI_18482384-S | 81.8    | 95.2   | 72.1   | SLC38A4    | <a href="#">NM_018018.2</a> | ATA3;NAT3;PAAT;FLJ10191                 |              |             |              |
| GI_18490979-A | 1057.2  | 761.7  | 609.6  | HOM-TES-10 | <a href="#">NM_080731.1</a> | FLJ20703;DKFZP586I2223                  |              |             |              |
| GI_18490979-I | 227.9   | 281.6  | 220.7  | HOM-TES-10 | <a href="#">NM_080731.1</a> | FLJ20703;DKFZP586I2223                  |              |             |              |
| GI_18490981-S | 187.9   | 131.5  | 149.6  | THSD2      | <a href="#">NM_032784.2</a> | PWTSR;FLJ14440                          | electron     |             | electron     |
| GI_18490985-S | 95.5    | 106.5  | 96.1   | RPL10L     | <a href="#">NM_080746.2</a> |                                         | structural   | ribosome    | protein      |
| GI_18490986-S | 873.9   | 1023.4 | 937.6  | C1orf33    | <a href="#">NM_016183.2</a> | dJ657E11.4                              | structural   | ribosome    | protein      |
| GI_18490988-S | 12703.9 | 14602  | 11067  | RPS27L     | <a href="#">NM_015920.2</a> |                                         | zinc ion     | ribosome    | protein      |
| GI_18490989-S | 349     | 829.8  | 298.8  | MX1        | <a href="#">NM_002462.2</a> | MX;MxA;IFI78;IFI-78K                    | GTPase       | cytoplasm   | induction    |
| GI_18490990-S | 1006.7  | 1362.2 | 1501.9 | TOPK       | <a href="#">NM_018492.2</a> | SPK;Nori-3;FLJ14385                     | ATP          |             | protein      |
| GI_18490992-I | 116.4   | 108.5  | 109.8  | MRVI1      | <a href="#">NM_130385.1</a> | IRAG                                    | tumor        | endoplas    | oncogene     |
| GI_18490994-A | 96.1    | 107.4  | 109.4  | MRVI1      | <a href="#">NM_006069.2</a> | IRAG                                    | tumor        | endoplas    | oncogene     |
| GI_18490994-I | 221.9   | 309.3  | 259.9  | MRVI1      | <a href="#">NM_006069.2</a> | IRAG                                    | tumor        | endoplas    | oncogene     |
| GI_18490996-A | 102.3   | 94.8   | 97.3   | CR1        | <a href="#">NM_000573.2</a> | C3BR;CD35                               | compleme     | integral to | compleme     |
| GI_18490998-I | 106.2   | 102.8  | 101.8  | WISP1      | <a href="#">NM_003882.2</a> | CCN4                                    | insulin-like | soluble     | oncogene     |
| GI_18490999-A | 110.4   | 120.5  | 104.7  | WISP1      | <a href="#">NM_080838.1</a> | CCN4                                    | insulin-like | soluble     | oncogene     |
| GI_18491001-S | 246.6   | 288.1  | 267.2  | WISP2      | <a href="#">NM_003881.2</a> | CCN5;CT58;CTGF-L                        | insulin-like | soluble     | oncogene     |
| GI_18491002-I | 93      | 89.9   | 99.1   | WISP3      | <a href="#">NM_003880.2</a> | PPD;CCN6;LIBC;PPAC                      |              | soluble     | oncogene     |
| GI_18491003-A | 146.8   | 160.8  | 136.5  | WISP3      | <a href="#">NM_130396.1</a> | PPD;CCN6;LIBC;PPAC                      |              | soluble     | oncogene     |
| GI_18491003-I | 98      | 118.4  | 106.1  | WISP3      | <a href="#">NM_130396.1</a> | PPD;CCN6;LIBC;PPAC                      |              | soluble     | oncogene     |
| GI_18491007-S | 201.5   | 189.6  | 113.9  | CYP2J2     | <a href="#">NM_000775.2</a> | CPJ2                                    | arachidoni   | membran     | regulation   |
| GI_18491009-S | 195.7   | 136    | 109.3  | PTPRB      | <a href="#">NM_002837.2</a> | PTPB;HPTPB;HPTP-BETA;R-PTP-BETA         | transmem     | membran     | phosphate    |
| GI_18491011-I | 148     | 143.7  | 153.9  | FLJ14249   | <a href="#">NM_022460.2</a> |                                         |              |             | intracellula |
| GI_18491013-A | 2462.8  | 1808.5 | 2135.2 | FLJ14249   | <a href="#">NM_106552.1</a> |                                         |              |             | intracellula |
| GI_18491021-S | 223.7   | 227.4  | 176.2  | C20orf12   | <a href="#">NM_018152.2</a> | C20orf84;FLJ10600;FLJ30892;dJ568F9.2;bA |              |             |              |
| GI_18491023-I | 184.8   | 251.4  | 304.4  | DPP3       | <a href="#">NM_005700.2</a> | FLJ11387;FLJ22331                       | dipeptidyl-  | cytoplasm   | proteolysis  |
| GI_18491025-A | 1747.5  | 2703.3 | 3281   | DPP3       | <a href="#">NM_130443.1</a> | FLJ11387;FLJ22331                       | dipeptidyl-  | cytoplasm   | proteolysis  |
| GI_18491027-S | 10983.1 | 10205  | 8100.9 | C15orf15   | <a href="#">NM_016304.2</a> | L30;RPL24;RPL24;RPL24L;HRP-L30-iso      | structural   | ribosome    | protein      |
| GI_18496982-S | 277.2   | 508.4  | 264.4  | CLIPR-59   | <a href="#">NM_015526.1</a> | CLIPR59;DKFZp586N1922                   |              |             |              |
| GI_18497285-S | 1440.2  | 1289   | 1012.3 | DHX36      | <a href="#">NM_020865.1</a> | DDX36;MLEL1;KIAA1488                    | nucleic      |             |              |
| GI_18497287-S | 585.1   | 1564.1 | 2195.9 | LTBP3      | <a href="#">NM_021070.2</a> | LTBP2;DKFZP586M2123                     |              |             |              |
| GI_18497297-S | 237.5   | 277    | 296.3  | TOR2A      | <a href="#">NM_130459.1</a> | TORP1;FLJ14771                          |              |             |              |

|               |       |        |       |           |                             |               |        |             |             |
|---------------|-------|--------|-------|-----------|-----------------------------|---------------|--------|-------------|-------------|
| GI_18543372-S | 884.9 | 1006.6 | 748.4 | MMP17     | <a href="#">NM_016155.2</a> | MT4-MMP       | enzyme | extracellul | proteolysis |
| GI_18543374-S | 96    | 100.4  | 105.3 | PURG      | <a href="#">NM_013357.2</a> | PURG-A;PURG-B |        |             |             |
| GI_18546481-S | 135.1 | 157.7  | 161.5 | LOC148713 | <a href="#">XM_086287.1</a> |               |        |             |             |
| GI_18548545-S | 200.8 | 226.1  | 202.8 | KIAA1337  | <a href="#">XM_052561.5</a> |               |        |             |             |
| GI_18549712-S | 311   | 377    | 353   | LOC128372 | <a href="#">XM_060957.2</a> |               |        |             |             |
| GI_18549722-S | 113.8 | 127.4  | 116   | LOC128368 | <a href="#">XM_060953.2</a> |               |        |             |             |
| GI_18549724-S | 156.5 | 198.8  | 154.9 | LOC128367 | <a href="#">XM_060952.2</a> |               |        |             |             |
| GI_18550284-S | 110   | 121.7  | 101.2 | KIAA1912  | <a href="#">XM_055636.2</a> |               |        |             |             |
| GI_18552042-S | 163.6 | 173.6  | 155.4 | LOC151154 | <a href="#">XM_098008.1</a> |               |        |             |             |
| GI_18552201-S | 120.5 | 145.3  | 145.5 | LOC151200 | <a href="#">XM_098022.1</a> |               |        |             |             |
| GI_18553076-S | 110.5 | 112.7  | 100.1 | LOC151443 | <a href="#">XM_087200.1</a> |               |        |             |             |
| GI_18553091-S | 105.3 | 110    | 89.6  | LOC130839 | <a href="#">XM_059473.2</a> |               |        |             |             |
| GI_18553104-S | 285.3 | 326.6  | 304.9 | LOC151451 | <a href="#">XM_087208.1</a> |               |        |             |             |
| GI_18555356-S | 162   | 170    | 164.4 | LOC152118 | <a href="#">XM_098163.1</a> |               |        |             |             |
| GI_18555449-S | 120.6 | 127.2  | 121.6 | LOC152138 | <a href="#">XM_093644.1</a> |               |        |             |             |
| GI_18555804-S | 211.6 | 230.5  | 212.5 | LOC131920 | <a href="#">XM_059548.2</a> |               |        |             |             |
| GI_18560129-S | 118.1 | 132    | 119.7 | LOC153297 | <a href="#">XM_098350.1</a> |               |        |             |             |
| GI_18562551-S | 96.5  | 95     | 87.6  | LOC153959 | <a href="#">XM_098450.1</a> |               |        |             |             |
| GI_18562991-S | 244.9 | 307.7  | 270.2 | PLEKHG1   | <a href="#">XM_027307.2</a> |               |        |             |             |
| GI_18563960-S | 101.7 | 111.5  | 96.4  | LOC154323 | <a href="#">XM_098512.1</a> |               |        |             |             |
| GI_18564472-S | 279.7 | 365.7  | 305.9 | LOC154449 | <a href="#">XM_087928.1</a> |               |        |             |             |
| GI_18566487-S | 81.3  | 90.3   | 81.9  | LOC154907 | <a href="#">XM_088072.1</a> |               |        |             |             |
| GI_18570944-S | 90.8  | 87.9   | 81.9  | C8orf7    | <a href="#">XM_088376.1</a> |               |        |             |             |
| GI_18572392-S | 82.9  | 86     | 84.3  | LOC158131 | <a href="#">XM_088491.1</a> |               |        |             |             |
| GI_18572749-S | 133.2 | 145.4  | 134.3 | LOC158226 | <a href="#">XM_088516.1</a> |               |        |             |             |
| GI_18573403-S | 99.7  | 102    | 92.3  | C9orf4    | <a href="#">XM_088565.1</a> |               |        |             |             |
| GI_18575382-S | 94.5  | 98.2   | 78.1  | LOC143034 | <a href="#">XM_096376.1</a> |               |        |             |             |
| GI_18577864-S | 98.4  | 101.6  | 88.2  | LOC143678 | <a href="#">XM_096472.1</a> |               |        |             |             |
| GI_18580213-S | 115.5 | 176.1  | 141   | KIAA0984  | <a href="#">XM_037557.2</a> |               |        |             |             |
| GI_18580675-S | 151   | 172    | 158.9 | LOC144631 | <a href="#">XM_096642.1</a> |               |        |             |             |
| GI_18582778-S | 95.8  | 91.9   | 105.7 | LOC145197 | <a href="#">XM_096734.1</a> |               |        |             |             |
| GI_18584496-S | 164.7 | 168.7  | 161.7 | LOC145846 | <a href="#">XM_096883.1</a> |               |        |             |             |
| GI_18589705-S | 121   | 137    | 122.8 | LOC147649 | <a href="#">XM_085830.1</a> |               |        |             |             |
| GI_18590346-S | 120.7 | 143    | 126.2 | LOC147941 | <a href="#">XM_097347.1</a> |               |        |             |             |
| GI_18590348-S | 115.1 | 128.5  | 103.9 | LOC147942 | <a href="#">XM_085967.1</a> |               |        |             |             |
| GI_18591447-S | 78.3  | 108.6  | 96.4  | LOC126520 | <a href="#">XM_059051.2</a> |               |        |             |             |
| GI_18591841-S | 177.1 | 188.2  | 162.9 | LOC149709 | <a href="#">XM_086637.1</a> |               |        |             |             |
| GI_18591846-S | 112.1 | 110.3  | 126.9 | LOC149710 | <a href="#">XM_086659.1</a> |               |        |             |             |
| GI_18592730-S | 467.3 | 366.2  | 319   | LOC149934 | <a href="#">XM_086725.1</a> |               |        |             |             |
| GI_18592785-S | 156.1 | 169.5  | 176   | LOC149950 | <a href="#">XM_086732.1</a> |               |        |             |             |
| GI_18594428-S | 450.4 | 474.6  | 368.1 | KIAA0767  | <a href="#">XM_027105.3</a> |               |        |             |             |
| GI_18594499-S | 158.5 | 196.2  | 180.4 | FLJ13330  | <a href="#">NM_025091.2</a> |               |        |             |             |
| GI_18595513-S | 126.9 | 98.7   | 91.5  | LOC158724 | <a href="#">XM_098981.1</a> | MGC27003      |        |             |             |
| GI_18595832-S | 106.5 | 98.7   | 100.7 | LOC158813 | <a href="#">XM_088680.1</a> |               |        |             |             |

|               |        |        |        |           |                             |                                        |             |                        |
|---------------|--------|--------|--------|-----------|-----------------------------|----------------------------------------|-------------|------------------------|
| GI_18598508-S | 495.1  | 413.3  | 374.9  | CDR2      | <a href="#">XM_071866.2</a> |                                        |             |                        |
| GI_18599649-S | 107.3  | 111.1  | 113.5  | LOC152920 | <a href="#">XM_087561.1</a> |                                        |             |                        |
| GI_18599776-S | 899.5  | 810.4  | 812.1  | FLJ13456  | <a href="#">XM_038291.5</a> |                                        |             |                        |
| GI_18602338-S | 106.9  | 113.2  | 102.5  | LOC145760 | <a href="#">XM_085225.1</a> |                                        |             |                        |
| GI_18605326-S | 180.6  | 192.3  | 183.8  | LOC120776 | <a href="#">XM_062286.2</a> |                                        |             |                        |
| GI_18605333-S | 187.9  | 234.8  | 213.5  | LOC144125 | <a href="#">XM_090203.1</a> |                                        |             |                        |
| GI_18640735-S | 252.1  | 331.6  | 269.2  | CACH-1    | <a href="#">NM_130767.1</a> | serine                                 |             | fatty acid             |
| GI_18640737-S | 108.7  | 119.9  | 110    | GASZ      | <a href="#">NM_130768.1</a> | signal                                 | cytoplasm   | germ-cell              |
| GI_18640739-S | 195.7  | 205.6  | 189.5  | HTR3C     | <a href="#">NM_130770.1</a> | extracellul                            | integral to | ion                    |
| GI_18640743-S | 101.8  | 118.7  | 99.7   | S100Z     | <a href="#">NM_130772.1</a> | calcium                                |             |                        |
| GI_18640747-S | 1910.6 | 1617.4 | 1179.9 | RAB24     | <a href="#">NM_130781.1</a> |                                        |             |                        |
| GI_18640749-S | 100.7  | 134.5  | 104.2  | RGS18     | <a href="#">NM_130782.1</a> | RGS13                                  | signal      | signal                 |
| GI_18640753-S | 347.4  | 398.2  | 313.1  | C10orf94  | <a href="#">NM_130784.1</a> | ba108K14.6                             |             |                        |
| GI_18641280-A | 2508.1 | 2157.2 | 1558   | RFP       | <a href="#">NM_030950.2</a> | RNF76;TRIM27                           | nucleic     | membran spermatog      |
| GI_18641344-A | 117.5  | 128.6  | 120.5  | TRIM34    | <a href="#">NM_130390.1</a> | IFP1;RNF21                             |             |                        |
| GI_18641344-I | 84.2   | 78.7   | 77.6   | TRIM34    | <a href="#">NM_130390.1</a> | IFP1;RNF21                             |             |                        |
| GI_18641346-I | 214.2  | 216.9  | 216.6  | PTPRC     | <a href="#">NM_002838.2</a> | LCA;LY5;B220;CD45;T200;GP180           | transmem    | integral to cell       |
| GI_18641348-S | 168.5  | 266.7  | 231.2  | TRIM6     | <a href="#">NM_058166.2</a> | RNF89                                  | zinc ion    | kinesin                |
| GI_18641349-S | 118.2  | 870.4  | 176.5  | COL15A1   | <a href="#">NM_001855.2</a> |                                        | collagen    | collagen cell          |
| GI_18641351-S | 218.6  | 416.4  | 355    | COL16A1   | <a href="#">NM_001856.2</a> | 447AA                                  | collagen    | collagen pregnancy     |
| GI_18641353-I | 122    | 151.8  | 118.1  | COL17A1   | <a href="#">NM_000494.2</a> | BP180;BPAG2;LAD-1;BA16H23.2            |             | intercellula epidermal |
| GI_18641355-A | 243.7  | 193.4  | 162.7  | COL17A1   | <a href="#">NM_130778.1</a> | BP180;BPAG2;LAD-1;BA16H23.2            |             | intercellula epidermal |
| GI_18641357-I | 103.2  | 107.8  | 114.9  | COLEC12   | <a href="#">NM_030781.2</a> | CLP1;SRCL;SCARA4                       | sugar       | nucleus regulation     |
| GI_18641359-A | 97.3   | 177    | 87.3   | COLEC12   | <a href="#">NM_130386.1</a> | CLP1;SRCL;SCARA4                       | sugar       | nucleus regulation     |
| GI_18641365-A | 90.2   | 84.8   | 83.3   | PTPRC     | <a href="#">NM_080923.1</a> | LCA;LY5;B220;CD45;T200;GP180           | transmem    | integral to cell       |
| GI_18641365-I | 122.7  | 122.2  | 132.1  | PTPRC     | <a href="#">NM_080923.1</a> | LCA;LY5;B220;CD45;T200;GP180           | transmem    | integral to cell       |
| GI_18641367-A | 681.7  | 748.1  | 668.5  | MXI1      | <a href="#">NM_130439.1</a> | MAD2;MXD2                              | transcripti | nucleus negative       |
| GI_18641367-I | 154.2  | 155.7  | 164.5  | MXI1      | <a href="#">NM_130439.1</a> | MAD2;MXD2                              | transcripti | nucleus negative       |
| GI_18641369-I | 126.9  | 126.8  | 106.8  | MXI1      | <a href="#">NM_005962.2</a> | MAD2;MXD2                              | transcripti | nucleus negative       |
| GI_18641371-S | 239.7  | 334.8  | 273.9  | HLA-DRB3  | <a href="#">NM_022555.3</a> | HLA-DR3B                               | class II    | integral to signal     |
| GI_18641372-S | 139.2  | 672.4  | 283.6  | HLA-DRB4  | <a href="#">NM_021983.3</a> | HLA-DR4B                               | class II    | integral to signal     |
| GI_18641376-S | 146.6  | 410.9  | 172.4  | HLA-DMB   | <a href="#">NM_002118.3</a> | RING7;D6S221E                          | MHC-        | integral to perception |
| GI_18641377-S | 182.2  | 234    | 206.2  | HLA-DOB   | <a href="#">NM_002120.2</a> |                                        | class II    | integral to immune     |
| GI_18641378-S | 134.3  | 456.8  | 222.5  | HLA-DRA   | <a href="#">NM_019111.2</a> | HLA-DRA1                               | MHC         | integral to immune     |
| GI_18644731-A | 110.5  | 115.2  | 112.8  | CST11     | <a href="#">NM_080830.2</a> | SC13;dJ322G13.6                        |             |                        |
| GI_18644735-I | 103.5  | 88     | 100.5  | RGS3      | <a href="#">NM_130795.1</a> | C2PA;RGP3;FLJ20370;PDZ-RGS3            | GTPase      | cytosol regulation     |
| GI_18644884-S | 592.2  | 615.9  | 718.2  | PDXK      | <a href="#">NM_003681.2</a> | PKH;PNK                                | pyridoxal   |                        |
| GI_18677727-S | 224.2  | 256    | 244    | RAB3D     | <a href="#">NM_004283.2</a> | GOV;D2-2;RAB16;RAD3D                   | RAB small   | hemocyte               |
| GI_18677732-S | 101.9  | 117.6  | 104.7  | CPNE4     | <a href="#">NM_130808.1</a> | CPN4;COPN4;MGC15604                    |             |                        |
| GI_18677736-S | 91.5   | 96     | 100.1  | DYX1C1    | <a href="#">NM_130810.1</a> | EKN1;FLJ37882                          |             |                        |
| GI_18677769-S | 157.4  | 160.6  | 141.2  | DCNP1     | <a href="#">NM_130848.1</a> |                                        |             |                        |
| GI_18699719-S | 531    | 466.4  | 358.2  | PPP1R13B  | <a href="#">NM_015316.1</a> | p85;ASPP1;KIAA0771;p53BP2-like         | defense/i   | nucleus apoptosis      |
| GI_18699721-S | 651.4  | 733.3  | 417.8  | ShrmL     | <a href="#">NM_020859.1</a> | Shroom;KIAA1481                        | protein     |                        |
| GI_18699723-S | 708.3  | 773.8  | 513.8  | C6orf111  | <a href="#">NM_032870.1</a> | FLJ14752;FLJ14992;bA98I9.2;DKFZp564B07 |             |                        |

|               |        |        |        |          |                             |                                        |              |                         |
|---------------|--------|--------|--------|----------|-----------------------------|----------------------------------------|--------------|-------------------------|
| GI_18699731-A | 1986.8 | 2637.2 | 2712.3 | Cab45    | <a href="#">NM_016176.2</a> |                                        |              |                         |
| GI_18702322-S | 94.6   | 127.9  | 101.6  | DNCL2B   | <a href="#">NM_130897.1</a> | DNLC2B                                 | microtubul   | cytoplasmic microtubul  |
| GI_18702326-S | 100.3  | 105.7  | 111.9  | MGC26988 | <a href="#">NM_130899.1</a> |                                        |              |                         |
| GI_18702328-S | 93.5   | 92.2   | 82.9   | RAET1L   | <a href="#">NM_130900.1</a> |                                        | membran      | immune                  |
| GI_18702330-S | 109.6  | 112.4  | 107.6  | C15orf16 | <a href="#">NM_130901.1</a> | CEZANNE2                               |              |                         |
| GI_18702332-S | 138.7  | 166.8  | 154.6  | COX7B2   | <a href="#">NM_130902.1</a> |                                        |              |                         |
| GI_18765691-S | 207    | 228.4  | 195.4  | LAMC3    | <a href="#">NM_006059.2</a> | DKFZp434E202                           | structural   | membran cell shape      |
| GI_18765693-S | 128.3  | 150.7  | 134.1  | DPP4     | <a href="#">NM_001935.2</a> | CD26;ADABP;ADCP2;DPPIV;TP103           | dipeptidyl-  | peripheral immune       |
| GI_18765695-A | 207.8  | 228.2  | 200    | DPP6     | <a href="#">NM_001936.2</a> | DPPX                                   | dipeptidyl-  | integral to proteolysis |
| GI_18765695-I | 108.8  | 131.2  | 106.2  | DPP6     | <a href="#">NM_001936.2</a> | DPPX                                   | dipeptidyl-  | integral to proteolysis |
| GI_18765697-I | 112.2  | 107.7  | 99.7   | DPP6     | <a href="#">NM_130797.1</a> | DPPX                                   | dipeptidyl-  | integral to proteolysis |
| GI_18765699-I | 96.7   | 118.9  | 113.8  | ELMO1    | <a href="#">NM_014800.8</a> | CED12;KIAA0281                         | SH3-         | cytoskelet phagocyto    |
| GI_18765701-A | 176.3  | 350.1  | 433    | ELMO1    | <a href="#">NM_130442.1</a> | CED12;KIAA0281                         | SH3-         | cytoskelet phagocyto    |
| GI_18765701-I | 101.4  | 115    | 118.3  | ELMO1    | <a href="#">NM_130442.1</a> | CED12;KIAA0281                         | SH3-         | cytoskelet phagocyto    |
| GI_18765703-A | 341    | 405    | 356.8  | PLUNC    | <a href="#">NM_016583.2</a> | LUNX;NASG;SPURT;SPLUNC1;bA49G10.5      | defense/i    | extracellul response    |
| GI_18765704-I | 300.5  | 365.9  | 327.2  | PLUNC    | <a href="#">NM_130852.1</a> | LUNX;NASG;SPURT;SPLUNC1;bA49G10.5      | defense/i    | extracellul response    |
| GI_18765706-I | 166.5  | 208.6  | 187.4  | SKIP     | <a href="#">NM_130766.1</a> |                                        | inositol-    | cytoplasm actin         |
| GI_18765710-S | 891.6  | 535.6  | 541.9  | FJX1     | <a href="#">NM_014344.2</a> | FLJ22416                               |              | extracellul             |
| GI_18765712-S | 3900.9 | 3873.8 | 3768   | TSG101   | <a href="#">NM_006292.2</a> | TSG10                                  | transcripti  | kinesin ubiquitin       |
| GI_18765714-S | 784.7  | 1382.8 | 577.8  | HLA-DMA  | <a href="#">NM_006120.2</a> | HLADM;RING6;D6S222E                    | MHC-         | integral to perception  |
| GI_18765719-S | 95.4   | 114.8  | 113.6  | MAB21L1  | <a href="#">NM_005584.2</a> | CAGR1                                  |              | embryoge                |
| GI_18765720-S | 100.3  | 101    | 105.7  | MAB21L2  | <a href="#">NM_006439.3</a> | FLJ31103                               |              | nucleus neurogene       |
| GI_18765721-S | 294.2  | 318.1  | 299.3  | MAGEL2   | <a href="#">NM_019066.2</a> | nM15;NDNL1                             | molecular    | cellular_co biological_ |
| GI_18765724-S | 179.3  | 194.5  | 166.9  | MPP2     | <a href="#">NM_005374.2</a> | DLG2;DKFZp761D0712                     | guanylate    | membran signal          |
| GI_18765726-S | 105.9  | 102.7  | 111.2  | MYOG     | <a href="#">NM_002479.2</a> | MYF4;MYOGENIN                          | transcripti  | nucleus myogenes        |
| GI_18765728-I | 282.9  | 289.3  | 259.2  | SNAP23   | <a href="#">NM_003825.2</a> | SNAP23A;SNAP23B;HsT17016               | t-SNARE      | secretory nonselecti    |
| GI_18765730-A | 355.2  | 313.8  | 264.3  | SNAP23   | <a href="#">NM_130798.1</a> | SNAP23A;SNAP23B;HsT17016               | t-SNARE      | secretory nonselecti    |
| GI_18765734-A | 637.2  | 1314.8 | 538.4  | SNAP25   | <a href="#">NM_130811.1</a> | SNAP;SNAP-                             | molecular    | cellular_co regulation  |
| GI_18765736-S | 315.4  | 379.5  | 358.9  | SNAP29   | <a href="#">NM_004782.2</a> | SNAP-29;FLJ21051                       | SNAP         | kinesin nonselecti      |
| GI_18765737-A | 1161   | 1605.5 | 1373.6 | SMG1     | <a href="#">NM_014006.2</a> | ATX;LIP;KIAA0421                       | inositol/ph  |                         |
| GI_18765738-I | 159.8  | 152.8  | 130.5  | SMG1     | <a href="#">NM_015092.2</a> | ATX;LIP;KIAA0421                       | inositol/ph  |                         |
| GI_18765740-S | 159.5  | 192.4  | 162.2  | SNAI1    | <a href="#">NM_005985.2</a> | SNA;SNAH;SLUGH2;dJ710H13.1             | DNA          | nucleus cartilage       |
| GI_18765742-S | 949.1  | 696.8  | 1099.9 | SNTA1    | <a href="#">NM_003098.2</a> | SNT1;TACIP1;dJ1187J4.5                 | protein      | membran muscle          |
| GI_18765743-S | 182.4  | 232.5  | 211.9  | SN       | <a href="#">NM_023068.2</a> | CD169;FLJ00051;FLJ00055;FLJ00073;FLJ32 | lectin [goid | integral to cell-matrix |
| GI_18765747-A | 122.9  | 382.5  | 124.4  | COL18A1  | <a href="#">NM_130445.1</a> | KNO                                    | tumor        | collagen negative       |
| GI_18765747-I | 259.7  | 318.9  | 263.7  | COL18A1  | <a href="#">NM_130445.1</a> | KNO                                    | tumor        | collagen negative       |
| GI_18765749-I | 109.6  | 126.7  | 123.5  | DYRK1A   | <a href="#">NM_101395.1</a> | MNB;DYRK;HP86;MNBH;DYRK1               | protein      | nucleus neurogene       |
| GI_18765751-I | 122.1  | 125.1  | 112.3  | DYRK1A   | <a href="#">NM_130436.1</a> | MNB;DYRK;HP86;MNBH;DYRK1               | protein      | nucleus neurogene       |
| GI_18765755-A | 780.6  | 927    | 860.4  | DYRK1A   | <a href="#">NM_130438.1</a> | MNB;DYRK;HP86;MNBH;DYRK1               | protein      | nucleus neurogene       |
| GI_18780268-S | 93     | 101.1  | 88.3   | COL19A1  | <a href="#">NM_001858.2</a> | COL9A1L;D6S228E                        | collagen     | collagen skeletal       |
| GI_18780272-S | 77.7   | 80.8   | 95.8   | COL21A1  | <a href="#">NM_030820.2</a> | COLA1L;dJ708F5.1;dJ682J15.1;DKFZp564B  | structural   | microfibril cell        |
| GI_18780284-A | 209.6  | 258.3  | 219.1  | MADCAM1  | <a href="#">NM_130762.1</a> | MACAM1                                 | cell         | integral to cell        |
| GI_18860830-A | 885.6  | 957.5  | 887    | OPA1     | <a href="#">NM_130831.1</a> | NPG;NTG;largeG;FLJ12460;KIAA0567       | GTP          | mitochond vision        |
| GI_18860850-A | 421.2  | 504.9  | 457.8  | MEN1     | <a href="#">NM_130801.1</a> | MEAI;SCG2                              | protein      | nucleus regulation      |

|               |        |        |        |          |                             |                                       |             |             |              |
|---------------|--------|--------|--------|----------|-----------------------------|---------------------------------------|-------------|-------------|--------------|
| GI_18860852-I | 126.9  | 153.2  | 134.5  | MEN1     | <a href="#">NM_130802.1</a> | MEAI;SCG2                             | protein     | nucleus     | regulation   |
| GI_18860854-I | 95     | 88.9   | 88.3   | MEN1     | <a href="#">NM_130803.1</a> | MEAI;SCG2                             | protein     | nucleus     | regulation   |
| GI_18860861-I | 100.2  | 98.3   | 103    | MADD     | <a href="#">NM_130470.1</a> | DENN;IG20;KIAA0358                    | death       | cytoplasm   | cell         |
| GI_18860869-A | 304.8  | 332.6  | 279.1  | MADD     | <a href="#">NM_130474.1</a> | DENN;IG20;KIAA0358                    | death       | cytoplasm   | cell         |
| GI_18860883-I | 131.1  | 154.6  | 138.2  | WVOX     | <a href="#">NM_130791.1</a> | FOR;FRA16D;HHCMA56;PRO0128;D16S43     | catalytic   |             | steroid      |
| GI_18860887-A | 138.7  | 148.2  | 143.3  | WVOX     | <a href="#">NM_130844.1</a> | FOR;FRA16D;HHCMA56;PRO0128;D16S43     | catalytic   |             | steroid      |
| GI_18860887-I | 109.1  | 111.2  | 108.1  | WVOX     | <a href="#">NM_130844.1</a> | FOR;FRA16D;HHCMA56;PRO0128;D16S43     | catalytic   |             | steroid      |
| GI_18860893-A | 128.4  | 131.9  | 121.3  | PTPRD    | <a href="#">NM_130393.1</a> | HPTP;PTPD;HPTPD;HPTP-DELTA;R-PTP-     | transmem    | integral to | transmem     |
| GI_18860895-A | 1808.6 | 1358   | 1682.6 | PTPRF    | <a href="#">NM_130440.1</a> | LAR                                   | transmem    | integral to | transmem     |
| GI_18860897-S | 435.1  | 536.6  | 363.6  | PTPRG    | <a href="#">NM_002841.2</a> | PTPG;HPTPG;RPTPG;R-PTP-GAMMA          | transmem    | integral to | transmem     |
| GI_18860899-S | 109.9  | 129    | 107.2  | PTPRJ    | <a href="#">NM_002843.2</a> | DEP1;SCC1;CD148;HPTPeta;R-PTP-ETA     | transmem    | integral to | transmem     |
| GI_18860901-S | 1245.7 | 1858   | 1119.8 | PTPRK    | <a href="#">NM_002844.2</a> | R-PTP-kappa                           | transmem    | integral to | protein      |
| GI_18860903-S | 695.6  | 1134.1 | 1136.5 | PTPRM    | <a href="#">NM_002845.2</a> | RPTPM;RPTPU;PTPRL1;hR-PTPu;R-PTP-     | transmem    | integral to | protein      |
| GI_18860905-S | 509.1  | 360.5  | 2663.4 | PTPRN    | <a href="#">NM_002846.2</a> | IA2;IA-2;ICA512;R-PTP-N;IA-2/PTP      | transmem    | integral to | protein      |
| GI_18860906-S | 298.1  | 353.3  | 301.6  | USP31    | <a href="#">NM_032236.3</a> | USP48;FLJ11328;FLJ20103;FLJ23054;FLJ2 | peptidase   |             | ubiquitin-   |
| GI_18860908-S | 419    | 405.8  | 874.8  | SNTB1    | <a href="#">NM_021021.2</a> | A1B;SNT2;BSYN2;DAPA1B;SNT2B1;TIP-     | actin       | peripheral  | muscle       |
| GI_18860909-A | 1193.5 | 958.1  | 1223.9 | SNTB2    | <a href="#">NM_130845.1</a> | SNT3;SNTL;SNT2B2;EST25263;D16S2531E   | protein     | dystrophin- | intracellula |
| GI_18860911-I | 298.2  | 278.9  | 318.7  | SNTB2    | <a href="#">NM_006750.2</a> | SNT3;SNTL;SNT2B2;EST25263;D16S2531E   | protein     | dystrophin- | intracellula |
| GI_18860912-S | 870.6  | 853.7  | 791.5  | SNW1     | <a href="#">NM_012245.2</a> | SKIP;NCOA-62                          | transcripti | nucleus     | oncogene     |
| GI_18860913-S | 396.9  | 387.2  | 355.3  | SAV1     | <a href="#">NM_021818.2</a> | SAV;WW45;WWP4;salvador                |             | kinesin     |              |
| GI_18860914-S | 113.4  | 114.9  | 98.9   | XK       | <a href="#">NM_021083.2</a> | KX                                    | transporte  | integral to | small        |
| GI_18860915-S | 2556.7 | 3335.5 | 1701.2 | XRN2     | <a href="#">NM_012255.2</a> | FLJ10711;FLJ20077;dJ198K11.2;DKFZp434 | nuclease    | nucleus     | recombina    |
| GI_18860917-S | 207    | 153.4  | 160.1  | XYLB     | <a href="#">NM_005108.2</a> | FLJ10343;FLJ12539;FLJ22075            | xylulokina  |             | energy       |
| GI_18860919-S | 234.7  | 236.6  | 179.4  | ESRRA    | <a href="#">NM_004451.3</a> | ERR1;ERRa;ESRL1;NR3B1;ERRalpha        | ligand-     | nucleus     | regulation   |
| GI_18874095-S | 459.8  | 347.4  | 456.1  | PI4K2B   | <a href="#">NM_018323.2</a> | PI4KIIb;FLJ11105                      | inositol/ph |             |              |
| GI_18874098-S | 689.6  | 827.5  | 698.5  | IPO4     | <a href="#">NM_024658.2</a> | Imp4;FLJ23338                         | phospholi   | nuclear     | protein-     |
| GI_18921092-S | 89.5   | 102    | 97.4   | TRPM6    | <a href="#">NM_017662.3</a> | HSH;HMGX;HOMG;CHAK2;FLJ20087;FLJ22    |             |             |              |
| GI_18959199-S | 157.9  | 166.6  | 166.1  | LATS2    | <a href="#">NM_014572.1</a> |                                       | tumor       | nucleus     | protein      |
| GI_18959203-S | 146.1  | 173.4  | 160.3  | GIPC3    | <a href="#">NM_133261.1</a> |                                       | protein     |             | intracellula |
| GI_18959211-S | 118.7  | 126.9  | 113.2  | GSH-2    | <a href="#">NM_133267.1</a> |                                       | transcripti | nucleus     | regulation   |
| GI_19071572-S | 95.9   | 85.8   | 88     | C20orf51 | <a href="#">NM_022099.2</a> | ba305P22.4                            |             |             |              |
| GI_19111149-S | 389.6  | 441.1  | 476.2  | AMOT     | <a href="#">NM_133265.1</a> | FLJ14282;KIAA1071                     |             |             |              |
| GI_19115953-S | 139    | 136.2  | 132.8  | DNAH5    | <a href="#">NM_001369.1</a> | HL1;PCD;CILD3;Dnahc5;KIAA1603         | axonemal    | axonemal    | cell         |
| GI_19115957-A | 634.1  | 588.8  | 651.7  | SLC39A4  | <a href="#">NM_130849.1</a> | AEZ;ZIP4;FLJ20327                     | metal ion   | membran     | metal ion    |
| GI_19115957-I | 96.7   | 119.2  | 110    | SLC39A4  | <a href="#">NM_130849.1</a> | AEZ;ZIP4;FLJ20327                     | metal ion   | membran     | metal ion    |
| GI_19115959-S | 382.1  | 264.3  | 206    | C6orf33  | <a href="#">NM_133367.1</a> | MPRB;LMPB1;FLJ32521                   |             | integral to |              |
| GI_19115963-S | 145.2  | 175.6  | 174.9  | PLCD3    | <a href="#">NM_133373.1</a> |                                       | calcium     |             | lipid        |
| GI_19224662-S | 85.7   | 94.1   | 75.7   | my048    | <a href="#">NM_080390.2</a> | MY0876G05                             | DNA         | nucleus     | regulation   |
| GI_19263339-S | 2870.2 | 1745.4 | 1444   | GPT2     | <a href="#">NM_133443.1</a> | ALT2                                  | transamin   |             | biosynthes   |
| GI_19263342-S | 217.6  | 264.4  | 247.9  | MRIP2    | <a href="#">NM_133446.1</a> |                                       | DNA         | nucleus     |              |
| GI_19263344-S | 101.5  | 123.6  | 100.4  | EMID1    | <a href="#">NM_133455.1</a> | EMI5;EMU1;hEmu1                       | DNA         | extracellul | regulation   |
| GI_19263346-S | 108.7  | 100.6  | 102.4  | EMID2    | <a href="#">NM_133457.1</a> | EMI6;EMU2;hEmu2;COL26A1               | DNA         | extracellul | regulation   |
| GI_19311005-S | 128.7  | 269.9  | 278.9  | PPP1R14C | <a href="#">NM_030949.1</a> | KEPI;NY-BR-81;CPI17-like              |             |             |              |
| GI_19311007-A | 202.8  | 280.5  | 216.1  | GEFT     | <a href="#">NM_133483.1</a> |                                       |             |             |              |

|               |        |        |        |           |                             |                                   |             |                         |
|---------------|--------|--------|--------|-----------|-----------------------------|-----------------------------------|-------------|-------------------------|
| GI_19311007-I | 113    | 107.1  | 101.8  | GEFT      | <a href="#">NM_133483.1</a> |                                   |             |                         |
| GI_19311011-S | 3021.7 | 2336.6 | 2247.3 | BRIX      | <a href="#">NM_018321.2</a> | FLJ11100                          | molecular   | nucleolus ribosomal     |
| GI_19387843-I | 105.8  | 102.3  | 104.8  | MBNL3     | <a href="#">NM_018388.2</a> | CHCR;MBLX;MBXL;MBLX39;FLJ11316    | nucleic     | nucleus developm        |
| GI_19387853-S | 308.1  | 375.9  | 271.2  | NTNG2     | <a href="#">NM_032536.1</a> | Lmnt2;NTNG1;KIAA1857;MGC21884     | structural  | extracellul axonogen    |
| GI_19424121-S | 214.9  | 255.4  | 238.3  | SLC26A10  | <a href="#">NM_133489.1</a> |                                   | transcripti | intracellula regulation |
| GI_19424127-S | 93.1   | 98.4   | 94.6   | ASAH3     | <a href="#">NM_133492.1</a> | ACER1                             |             |                         |
| GI_19424129-S | 661.3  | 470.9  | 343.6  | CD109     | <a href="#">NM_133493.1</a> | FLJ38569;DKFZp762L1111            | endopepti   |                         |
| GI_19424131-S | 99.6   | 115.2  | 92.1   | NEK7      | <a href="#">NM_133494.1</a> |                                   | protein-    | protein                 |
| GI_19482155-A | 347.1  | 381    | 343.8  | LOC56965  | <a href="#">NM_020214.1</a> |                                   |             |                         |
| GI_19482155-I | 177.3  | 168.2  | 165.2  | LOC56965  | <a href="#">NM_020214.1</a> |                                   |             |                         |
| GI_19482173-S | 1421.8 | 1440.6 | 1622   | CUL2      | <a href="#">NM_003591.2</a> |                                   | tumor       | induction               |
| GI_19525732-S | 450.9  | 461.8  | 450.8  | HEL308    | <a href="#">NM_133636.1</a> | MGC20604                          | nucleic     |                         |
| GI_19525734-S | 121.8  | 124.7  | 125.7  | DQX1      | <a href="#">NM_133637.1</a> | FLJ23757                          | ATP         |                         |
| GI_19525736-S | 115.9  | 136.7  | 111.2  | ADAMTS19  | <a href="#">NM_133638.1</a> |                                   | zinc ion    | extracellul proteolysis |
| GI_19526470-S | 1152.5 | 1376.6 | 1101.4 | RTKN      | <a href="#">NM_033046.1</a> | B5                                |             |                         |
| GI_19526752-I | 69.4   | 83.2   | 71     | SYNE1     | <a href="#">NM_015293.1</a> | 8B;CPG2;MYNE1;MYNE-1;SYNE-1;SYNE- | lamin       | nuclear Golgi           |
| GI_19526766-I | 1868.6 | 1845.7 | 1792.6 | ZAK       | <a href="#">NM_133646.1</a> | MLTK;mlklak                       |             |                         |
| GI_19528648-I | 98.8   | 113.2  | 98.6   | BMP4      | <a href="#">NM_001202.2</a> | ZYME;BMP2B;BMP2B1                 | signal      | mesoderm                |
| GI_19528651-A | 473.5  | 348.8  | 156.4  | BMP4      | <a href="#">NM_130851.1</a> | ZYME;BMP2B;BMP2B1                 | signal      | mesoderm                |
| GI_19528651-I | 91     | 103.1  | 92.5   | BMP4      | <a href="#">NM_130851.1</a> | ZYME;BMP2B;BMP2B1                 | signal      | mesoderm                |
| GI_19528653-I | 616.6  | 500.4  | 513.1  | FAF1      | <a href="#">NM_007051.2</a> | hFAF1;CGI-03;HF1s                 | protein     | nucleus apoptosis       |
| GI_19528654-A | 1308.7 | 904.8  | 1053.9 | FAF1      | <a href="#">NM_131917.1</a> | hFAF1;CGI-03;HF1s                 | protein     | nucleus apoptosis       |
| GI_19528662-A | 731.2  | 915.1  | 845    | APBB3     | <a href="#">NM_133174.1</a> | FE65L2                            | protein     | cytoplasm               |
| GI_19549324-S | 87.1   | 88     | 83.5   | ARPM1     | <a href="#">NM_032487.2</a> | MGC15664                          | structural  | actin                   |
| GI_19549332-S | 407.5  | 340.6  | 257.7  | LOC51619  | <a href="#">NM_015983.2</a> |                                   | ubiquitin   | ubiquitin               |
| GI_19557632-I | 238.2  | 287.9  | 275.6  | PPIL3     | <a href="#">NM_032472.3</a> |                                   |             |                         |
| GI_19557635-A | 2983.4 | 2780.8 | 2262.6 | PPIL3     | <a href="#">NM_130906.1</a> |                                   |             |                         |
| GI_19557639-I | 112.9  | 118    | 110.2  | PPIL3     | <a href="#">NM_131916.1</a> |                                   |             |                         |
| GI_19557644-S | 172.5  | 212.7  | 191.8  | SCG3      | <a href="#">NM_013243.2</a> | SGIII                             | transmem    | membran protein         |
| GI_19557649-S | 153.7  | 195.9  | 139.5  | HIST1H2AE | <a href="#">NM_021052.2</a> | H2A.1;H2A.2;H2A/a;H2AFA           | DNA         | chromoso nucleoso       |
| GI_19557652-S | 89.9   | 85.2   | 94.8   | HIST1H2AD | <a href="#">NM_021065.2</a> | H2A.3;H2A/g;H2AFG                 | DNA         | chromoso nucleoso       |
| GI_19557655-S | 142.7  | 153.6  | 133.6  | HIST1H2AB | <a href="#">NM_003513.2</a> | H2A/m;H2AFM                       | DNA         | chromoso nucleoso       |
| GI_19557676-S | 4753.7 | 5391.2 | 3444.1 | HLA-C     | <a href="#">NM_002117.3</a> | D6S204;HLA-JY3                    | class I     | integral to immune      |
| GI_19557683-S | 1591.5 | 1527.4 | 1511   | SURF1     | <a href="#">NM_003172.2</a> |                                   | cytochrom   | mitochond cytochrom     |
| GI_19557686-S | 610    | 466.2  | 423.2  | SURF2     | <a href="#">NM_017503.2</a> | SURF-2                            | molecular   | cellular_co biological_ |
| GI_19593984-S | 3629.6 | 4825.6 | 4219.5 | SURF4     | <a href="#">NM_033161.2</a> | ERV29;FLJ22993                    | molecular   | endoplas biological_    |
| GI_19705425-S | 2027.3 | 2004.6 | 2386   | MANBAL    | <a href="#">NM_022077.2</a> | dJ1141E15.2                       |             | integral to             |
| GI_19718730-I | 386.9  | 441    | 377.3  | BRD4      | <a href="#">NM_058243.1</a> | CAP;MCAP;HUNKI                    |             |                         |
| GI_19718733-S | 95.3   | 237.2  | 90.6   | TLR2      | <a href="#">NM_003264.2</a> | TIL4                              | antibacteri | integral to induction   |
| GI_19718735-S | 123.9  | 131.4  | 94.1   | TLR3      | <a href="#">NM_003265.2</a> |                                   | antibacteri | integral to signal      |
| GI_19718736-S | 94.4   | 87.8   | 103.3  | TLR5      | <a href="#">NM_003268.3</a> | TIL3                              | antibacteri | integral to signal      |
| GI_19718744-I | 135.3  | 149    | 134.2  | UNG       | <a href="#">NM_003362.2</a> | DGU;UDG;UNG1;HIGM4;UNG15          | uracil DNA  | mitochond base-         |
| GI_19718745-A | 996.5  | 622.5  | 1043.1 | OSBPL1A   | <a href="#">NM_018030.3</a> | ORP1;OSBPL1B;FLJ10217             | phospholi   | intracellula lipid      |
| GI_19718745-I | 100.6  | 105.1  | 99     | OSBPL1A   | <a href="#">NM_018030.3</a> | ORP1;OSBPL1B;FLJ10217             | phospholi   | intracellula lipid      |

|               |         |        |        |          |                             |                                    |                      |             |              |
|---------------|---------|--------|--------|----------|-----------------------------|------------------------------------|----------------------|-------------|--------------|
| GI_19718747-A | 212.1   | 242.4  | 182.9  | IDN3     | <a href="#">NM_015384.2</a> | IDN3-                              |                      |             |              |
| GI_19718747-I | 87.1    | 89.9   | 87.3   | IDN3     | <a href="#">NM_015384.2</a> | IDN3-                              |                      |             |              |
| GI_19718748-I | 234.6   | 225.6  | 198.3  | IDN3     | <a href="#">NM_133433.1</a> | IDN3-                              |                      |             |              |
| GI_19718750-A | 352.2   | 357.1  | 407.2  | UNG      | <a href="#">NM_080911.1</a> | DGU;UDG;UNG1;HIGM4;UNG15           | uracil DNA mitochond | base-       |              |
| GI_19718750-I | 179.1   | 192.1  | 160.4  | UNG      | <a href="#">NM_080911.1</a> | DGU;UDG;UNG1;HIGM4;UNG15           | uracil DNA mitochond | base-       |              |
| GI_19718752-S | 403.5   | 426.8  | 485.9  | BAP1     | <a href="#">NM_004656.2</a> | hucep-6;HUCEP-13;KIAA0272          | ubiquitiny           | nucleus     | negative     |
| GI_19718753-A | 100.5   | 113.2  | 96.1   | RANBP2L1 | <a href="#">NM_032260.2</a> | BS-                                | RAN                  |             |              |
| GI_19718753-I | 91.5    | 101.6  | 81.1   | RANBP2L1 | <a href="#">NM_032260.2</a> | BS-                                | RAN                  |             |              |
| GI_19718756-S | 600.1   | 517.4  | 557.6  | RANBP2   | <a href="#">NM_006267.3</a> | NUP358                             | RAN                  | nuclear     | protein-     |
| GI_19718758-A | 4613.2  | 3541.8 | 2344.6 | FER1L3   | <a href="#">NM_133337.1</a> | MYOF;KIAA1207                      |                      | nuclear     | circulation  |
| GI_19718761-A | 2913.5  | 1980.8 | 1650.5 | UBE3A    | <a href="#">NM_130838.1</a> | AS;ANCR;E6-AP;EPVE6AP              | ubiquitin            |             | brain        |
| GI_19718763-I | 205.7   | 259.9  | 236.3  | UBE3A    | <a href="#">NM_130839.1</a> | AS;ANCR;E6-AP;EPVE6AP              | ubiquitin            |             | brain        |
| GI_19718770-S | 195.3   | 221.4  | 197.6  | ELMO3    | <a href="#">NM_024712.2</a> | CED12;FLJ13824                     |                      | membran     | phagocyto    |
| GI_19718771-A | 7498.1  | 4470   | 3265.2 | ASNS     | <a href="#">NM_001673.2</a> | TS11                               | asparagin            | soluble     | metabolis    |
| GI_19718773-I | 167.9   | 229.4  | 182    | ASNS     | <a href="#">NM_133436.1</a> | TS11                               | asparagin            | soluble     | metabolis    |
| GI_19718775-S | 609     | 762.2  | 850.7  | WEE1     | <a href="#">NM_003390.2</a> | WEE1hu                             | protein-             | nucleus     | regulation   |
| GI_19718776-S | 1099.4  | 1430.6 | 1979.9 | FEN1     | <a href="#">NM_004111.4</a> | MF1;RAD2;FEN-1                     | double-              | nucleus     | UV           |
| GI_19718777-A | 284.3   | 311.2  | 314.5  | SEMA6B   | <a href="#">NM_020241.2</a> | SEMAN;semaZ;SEMA-VIB;Sema Vlb;SEM- |                      |             |              |
| GI_19718779-I | 306.6   | 381.5  | 354.7  | SEMA6B   | <a href="#">NM_032108.2</a> | SEMAN;semaZ;SEMA-VIB;Sema Vlb;SEM- |                      |             |              |
| GI_19718789-A | 425     | 473.9  | 485.7  | RAD17    | <a href="#">NM_133341.1</a> | R24L;Rad24;HRAD17;RAD17Sp          |                      | nucleus     | DNA          |
| GI_19718793-I | 131.7   | 141.3  | 129.9  | RAD17    | <a href="#">NM_133343.1</a> | R24L;Rad24;HRAD17;RAD17Sp          |                      | nucleus     | DNA          |
| GI_19718798-A | 288.1   | 258.4  | 274    | RAD1     | <a href="#">NM_133282.1</a> | HRAD1                              | 3'-5'                | nucleus     | DNA          |
| GI_19718800-I | 125.3   | 133.8  | 124.2  | RAD1     | <a href="#">NM_133377.1</a> | HRAD1                              | 3'-5'                | nucleus     | DNA          |
| GI_19743563-S | 160.1   | 197.5  | 186.8  | CYP2A13  | <a href="#">NM_000766.3</a> | CPAD                               | monoxyg              | membran     | electron     |
| GI_19743564-S | 185.2   | 207.2  | 170.7  | CYP2F1   | <a href="#">NM_000774.3</a> | C2F1;CYP2F                         | monoxyg              | membran     | electron     |
| GI_19743568-I | 989.7   | 1251.9 | 1005.4 | TANK     | <a href="#">NM_004180.2</a> | I-TRAF                             | protein              |             | signal       |
| GI_19743570-A | 268.2   | 286.7  | 242.1  | TANK     | <a href="#">NM_133484.1</a> | I-TRAF                             | protein              |             | signal       |
| GI_19743570-I | 120.4   | 132.9  | 123.1  | TANK     | <a href="#">NM_133484.1</a> | I-TRAF                             | protein              |             | signal       |
| GI_19743572-S | 118.4   | 115.3  | 105.2  | WIT-1    | <a href="#">NM_015855.2</a> | dJ74J1.1                           | molecular            | cellular_co | cell         |
| GI_19743791-S | 311     | 255.5  | 190    | BNC      | <a href="#">NM_001717.2</a> | BNC1;HsT19447                      | transcripti          | nucleus     | epidermal    |
| GI_19743793-I | 81      | 80.7   | 80     | SHANK2   | <a href="#">NM_012309.1</a> | SHANK;CORTBP1;ProSAP1;SPANK-       | protein              | kinesin     | intracellula |
| GI_19743795-A | 90.1    | 88.4   | 81.2   | SHANK2   | <a href="#">NM_133266.1</a> | SHANK;CORTBP1;ProSAP1;SPANK-       | protein              | kinesin     | intracellula |
| GI_19743795-I | 109.4   | 111.2  | 105.4  | SHANK2   | <a href="#">NM_133266.1</a> | SHANK;CORTBP1;ProSAP1;SPANK-       | protein              | kinesin     | intracellula |
| GI_19743797-A | 832.2   | 668.2  | 707.1  | ZNF274   | <a href="#">NM_016324.2</a> | ZF2;HFB101                         | transcripti          | nucleolus   | regulation   |
| GI_19743800-I | 116.4   | 113.6  | 107.9  | ZNF274   | <a href="#">NM_133502.1</a> | ZF2;HFB101                         | transcripti          | nucleolus   | regulation   |
| GI_19743802-S | 105.4   | 111.5  | 119.4  | FBLN5    | <a href="#">NM_006329.2</a> | EVEC;UP50;DANCE                    | integrin             | extracellul | cell-matrix  |
| GI_19743804-A | 120.5   | 128.8  | 129.3  | ROBO1    | <a href="#">NM_002941.2</a> | SAX3;DUTT1;FLJ21882                | axon                 | integral to | cell         |
| GI_19743804-I | 146.1   | 162.5  | 156.2  | ROBO1    | <a href="#">NM_002941.2</a> | SAX3;DUTT1;FLJ21882                | axon                 | integral to | cell         |
| GI_19743805-I | 132.7   | 181.8  | 142.6  | ROBO1    | <a href="#">NM_133631.1</a> | SAX3;DUTT1;FLJ21882                | axon                 | integral to | cell         |
| GI_19743807-S | 208.9   | 311.1  | 116.9  | RODH     | <a href="#">NM_003725.2</a> | HSE                                | catalytic            |             | androgen     |
| GI_19743809-S | 203.6   | 227.7  | 223.3  | ROM1     | <a href="#">NM_000327.2</a> | ROSP1                              | G-protein            | integral to | vision       |
| GI_19743810-S | 1380.3  | 1569.1 | 1671.9 | TBK1     | <a href="#">NM_013254.2</a> | NAK;T2K;FLJ11330                   | protein              |             | NIK-I-       |
| GI_19743811-S | 133.6   | 150.8  | 140.6  | T        | <a href="#">NM_003181.2</a> | TFT                                | transcripti          | nucleus     | determinat   |
| GI_19743812-I | 15358.3 | 15810  | 14217  | ITGB1    | <a href="#">NM_002211.2</a> | CD29;FNRRB;MDF2;VLAB;GPIIA;MSK12   | cell                 |             | homophili    |

|               |        |        |        |          |                             |                                     |             |                       |
|---------------|--------|--------|--------|----------|-----------------------------|-------------------------------------|-------------|-----------------------|
| GI_19743814-I | 103.5  | 111.6  | 102.8  | ITGB1    | <a href="#">NM_033666.1</a> | CD29;FNRB;MDF2;VLAB;GPIIA;MSK12     | cell        | homophili             |
| GI_19743818-A | 5760.9 | 6968   | 6249.3 | ITGB1    | <a href="#">NM_033668.1</a> | CD29;FNRB;MDF2;VLAB;GPIIA;MSK12     | cell        | homophili             |
| GI_19743818-I | 97.6   | 93.9   | 88     | ITGB1    | <a href="#">NM_033668.1</a> | CD29;FNRB;MDF2;VLAB;GPIIA;MSK12     | cell        | homophili             |
| GI_19743822-I | 122.6  | 139.6  | 126.8  | ITGB1    | <a href="#">NM_133376.1</a> | CD29;FNRB;MDF2;VLAB;GPIIA;MSK12     | cell        | homophili             |
| GI_19743828-S | 102.4  | 104.3  | 104.8  | HIST1H3A | <a href="#">NM_003529.2</a> | H3/A;H3FA                           |             |                       |
| GI_19743834-S | 95.8   | 109.4  | 95.9   | HIST3H3  | <a href="#">NM_003493.2</a> | H3T;H3/g;H3FT                       | DNA         | chromoso nucleoso     |
| GI_19743835-S | 415.5  | 444.4  | 532.8  | TARBP1   | <a href="#">NM_005646.2</a> | TRP185;TRP-185;FLJ30482             | RNA         | nucleus pathogene     |
| GI_19743837-A | 1737.9 | 1882.6 | 2456.8 | TARBP2   | <a href="#">NM_004178.3</a> |                                     | RNA         | nucleus pathogene     |
| GI_19743844-I | 116.3  | 120.9  | 117.9  | DCN      | <a href="#">NM_001920.2</a> | PG40;PGII;PGS2;DSPG2;SLRR1B         | chondroiti  | extracellul histogene |
| GI_19743853-A | 95.7   | 107.7  | 99.4   | DCN      | <a href="#">NM_133507.1</a> | PG40;PGII;PGS2;DSPG2;SLRR1B         | chondroiti  | extracellul histogene |
| GI_19743870-I | 349.9  | 376.4  | 313.2  | FCAR     | <a href="#">NM_133279.1</a> | CD89                                | receptor    | integral to immune    |
| GI_19743872-A | 152.2  | 148.8  | 136.9  | FCAR     | <a href="#">NM_133280.1</a> | CD89                                | receptor    | integral to immune    |
| GI_19743874-S | 897.3  | 836.7  | 762.2  | FH       | <a href="#">NM_000143.2</a> | MCL;LRCC;HLRCC;MCUL1;FUMARASE       | fumarate    | TCA cycle fumarate    |
| GI_19743876-S | 469.7  | 438.2  | 437.2  | RFX1     | <a href="#">NM_002918.2</a> | EF-C                                | RNA         | nucleus immune        |
| GI_19743878-A | 128.8  | 149.4  | 124.6  | RFX2     | <a href="#">NM_134433.1</a> | FLJ14226                            | RNA         | nucleus regulation    |
| GI_19743882-I | 175.3  | 194.3  | 189.1  | RFX3     | <a href="#">NM_002919.2</a> | ba32F11.1                           | transcripti | nucleus regulation    |
| GI_19743883-A | 172.6  | 221.7  | 198.7  | RFX3     | <a href="#">NM_134428.1</a> | ba32F11.1                           | transcripti | nucleus regulation    |
| GI_19743883-I | 115.3  | 119.5  | 104.1  | RFX3     | <a href="#">NM_134428.1</a> | ba32F11.1                           | transcripti | nucleus regulation    |
| GI_19743885-I | 99.7   | 110.4  | 114.7  | RFX4     | <a href="#">NM_032491.2</a> | NYD-SP10                            | DNA         | nucleus               |
| GI_19743887-A | 92.5   | 93.4   | 77.3   | RFX4     | <a href="#">NM_002920.3</a> | NYD-SP10                            | DNA         | nucleus               |
| GI_19743887-I | 118.9  | 124.5  | 123    | RFX4     | <a href="#">NM_002920.3</a> | NYD-SP10                            | DNA         | nucleus               |
| GI_19743888-I | 241.6  | 232.1  | 272.3  | TADA2L   | <a href="#">NM_001488.2</a> | ADA2;KL04P;hADA2;FLJ12705           | transcripti | nucleus regulation    |
| GI_19743890-A | 209    | 184.9  | 218    | TADA2L   | <a href="#">NM_133439.1</a> | ADA2;KL04P;hADA2;FLJ12705           | transcripti | nucleus regulation    |
| GI_19743890-I | 96.4   | 112.6  | 95.4   | TADA2L   | <a href="#">NM_133439.1</a> | ADA2;KL04P;hADA2;FLJ12705           | transcripti | nucleus regulation    |
| GI_19743892-I | 1629.2 | 2489.8 | 2649.7 | TADA3L   | <a href="#">NM_006354.2</a> | ADA3;hADA3;FLJ20221;FLJ21329        | transcripti | nucleus regulation    |
| GI_19743893-I | 256.5  | 275.6  | 266.7  | TADA3L   | <a href="#">NM_133480.1</a> | ADA3;hADA3;FLJ20221;FLJ21329        | transcripti | nucleus regulation    |
| GI_19743895-A | 605.5  | 978.9  | 968.9  | TADA3L   | <a href="#">NM_133481.1</a> | ADA3;hADA3;FLJ20221;FLJ21329        | transcripti | nucleus regulation    |
| GI_19743897-S | 111.3  | 210.6  | 111.1  | ROR2     | <a href="#">NM_004560.2</a> | BDB;BDB1;NTRKR2                     | transmem    | integral to signal    |
| GI_19743899-I | 109.2  | 119.5  | 114.9  | RORA     | <a href="#">NM_002943.2</a> | ROR1;ROR2;ROR3;RZRA;NR1F1           | ligand-     | nucleus signal        |
| GI_19743900-I | 111.1  | 104    | 95.8   | RORA     | <a href="#">NM_134260.1</a> | ROR1;ROR2;ROR3;RZRA;NR1F1           | ligand-     | nucleus signal        |
| GI_19743902-I | 157.9  | 176.7  | 170.3  | RORA     | <a href="#">NM_134261.1</a> | ROR1;ROR2;ROR3;RZRA;NR1F1           | ligand-     | nucleus signal        |
| GI_19743904-A | 169.4  | 254.9  | 163.4  | RORA     | <a href="#">NM_134262.1</a> | ROR1;ROR2;ROR3;RZRA;NR1F1           | ligand-     | nucleus signal        |
| GI_19743904-I | 231.4  | 286.3  | 251.2  | RORA     | <a href="#">NM_134262.1</a> | ROR1;ROR2;ROR3;RZRA;NR1F1           | ligand-     | nucleus signal        |
| GI_19743906-S | 109    | 100.9  | 106.8  | RORB     | <a href="#">NM_006914.2</a> | RZRB;NR1F2;ROR-BETA;ba133M9.1       | protein     | nucleus regulation    |
| GI_19743908-S | 101.9  | 107.2  | 111.1  | RORC     | <a href="#">NM_005060.2</a> | TOR;RORG;RZRG;NR1F3                 | ligand-     | nucleus regulation    |
| GI_19743913-A | 119.3  | 148    | 120.4  | PTPRN2   | <a href="#">NM_130843.1</a> | IAR;ICAAR;PTPRP;PHOGRIN;IA-         | transmem    | integral to protein   |
| GI_19743915-I | 99.5   | 103.9  | 81     | PTPRR    | <a href="#">NM_002849.2</a> | EC-PTP;PCPTP1;PTP-SL;PTPBR7         | transmem    | integral to protein   |
| GI_19743916-A | 1078.5 | 408.9  | 597.4  | PTPRR    | <a href="#">NM_130846.1</a> | EC-PTP;PCPTP1;PTP-SL;PTPBR7         | transmem    | integral to protein   |
| GI_19743916-I | 122.5  | 140.3  | 131.4  | PTPRR    | <a href="#">NM_130846.1</a> | EC-PTP;PCPTP1;PTP-SL;PTPBR7         | transmem    | integral to protein   |
| GI_19743920-A | 139.3  | 184.3  | 163.4  | PTPRS    | <a href="#">NM_130853.1</a> | PTPSIGMA                            | transmem    | integral to           |
| GI_19743926-I | 90.6   | 95.8   | 93.4   | PTPRT    | <a href="#">NM_133170.1</a> | RTPPrho;KIAA0283                    | transmem    | integral to transmem  |
| GI_19743928-A | 234.4  | 285.4  | 260.2  | PTPRT    | <a href="#">NM_007050.3</a> | RTPPrho;KIAA0283                    | transmem    | integral to transmem  |
| GI_19743932-A | 225.7  | 289.1  | 420.7  | PTPRU    | <a href="#">NM_133178.1</a> | FMI;PTP;PCP-2;PTP-                  | transmem    | integral to transmem  |
| GI_19743936-S | 1255.8 | 1210   | 1284.7 | DDX27    | <a href="#">NM_017895.6</a> | RHLP;Rrp3p;PP3241;HSPC259;MGC1018;F | nucleic     | nucleus               |



|               |        |        |        |         |                             |                                     |                    |             |             |
|---------------|--------|--------|--------|---------|-----------------------------|-------------------------------------|--------------------|-------------|-------------|
| GI_19743938-S | 413.3  | 650.3  | 391.9  | DYSF    | <a href="#">NM_003494.2</a> | FER1L1;LGMD2B;FLJ00175              | integral to muscle |             |             |
| GI_19743939-S | 192.9  | 245.3  | 195.8  | PAGE-5  | <a href="#">NM_130467.2</a> |                                     |                    |             |             |
| GI_19745147-S | 148    | 143.2  | 129.3  | RC3     | <a href="#">NM_015263.1</a> | KIAA0856                            |                    |             |             |
| GI_19745161-S | 96.9   | 126.5  | 102    | NALP4   | <a href="#">NM_134444.1</a> | PAN2;RNH2;PYPAF4;FLJ32126           |                    |             |             |
| GI_19745179-S | 2032.9 | 3209.2 | 3394.6 | MO25    | <a href="#">NM_016289.2</a> | CGI-66                              |                    |             |             |
| GI_19747266-I | 374.2  | 460.6  | 401.8  | TTN     | <a href="#">NM_133378.1</a> | TMD;CMD1G;CMPD4;FLJ32040            | structural         | cytoskelet  | regulation  |
| GI_19747268-A | 122.9  | 134.4  | 128.7  | PLAC6   | <a href="#">NM_130776.1</a> | XAGE-3;pp9012                       |                    |             |             |
| GI_19747268-I | 112.9  | 125.7  | 130.5  | PLAC6   | <a href="#">NM_130776.1</a> | XAGE-3;pp9012                       |                    |             |             |
| GI_19747270-I | 116.7  | 144.1  | 127    | PLAC6   | <a href="#">NM_133179.1</a> | XAGE-3;pp9012                       |                    |             |             |
| GI_19747272-S | 147.9  | 199.2  | 168.4  | XAGE-5  | <a href="#">NM_130775.1</a> |                                     |                    |             |             |
| GI_19747274-A | 2651.9 | 2059.4 | 1474.6 | PHF10   | <a href="#">NM_018288.2</a> | XAP135;FLJ10975                     |                    |             |             |
| GI_19747277-S | 189.7  | 198.3  | 164.7  | ARHU    | <a href="#">NM_021205.3</a> | WRCH1;hG28K;WRCH-                   | Rho small          |             | small       |
| GI_19747278-A | 110.8  | 113.5  | 115.1  | GAGED2  | <a href="#">NM_133430.1</a> | XAGE1;XAGE-1                        |                    |             |             |
| GI_19747280-I | 96.3   | 102.4  | 102.6  | GAGED2  | <a href="#">NM_133431.1</a> | XAGE1;XAGE-1                        |                    |             |             |
| GI_19747282-S | 109.5  | 127.6  | 109.2  | GAGED3  | <a href="#">NM_130777.1</a> | XAGE2;XAGE-2                        |                    |             |             |
| GI_19747284-S | 88.3   | 97.1   | 87.5   | GAGEC1  | <a href="#">NM_007003.2</a> | JM27;PAGE4;GAGE-9;PAGE-1;PAGE-4     | molecular          | cellular_co | biological_ |
| GI_19882212-S | 157.3  | 175.7  | 166.3  | MASS1   | <a href="#">NM_032119.1</a> | FEB4;GPR98;USH2C;VLGR1;KIAA0686;DKF | G-protein          | membran     | neuropepti  |
| GI_19882216-I | 95     | 92.5   | 84     | MTO1    | <a href="#">NM_133645.1</a> | CGI-02                              | molecular          |             | electron    |
| GI_19882236-S | 111.5  | 112.7  | 105.7  | RHPN1   | <a href="#">NM_052924.1</a> | ODF5;RHPN;KIAA1929                  |                    |             |             |
| GI_19882238-S | 121.5  | 131.4  | 123.5  | GNRHR2  | <a href="#">NM_057163.1</a> |                                     | rhodopsin-         | integral to | G-protein   |
| GI_19882240-S | 184.8  | 123    | 117.3  | NOPE    | <a href="#">NM_020962.1</a> | DDM36;KIAA1628                      |                    |             |             |
| GI_19882248-I | 101.3  | 109.5  | 109.7  | CST11   | <a href="#">NM_130794.1</a> | SC13;dJ322G13.6                     |                    |             |             |
| GI_19882250-S | 90.5   | 97.9   | 95.1   | CST1    | <a href="#">NM_001898.2</a> |                                     | cysteine           |             |             |
| GI_19882252-S | 233.5  | 268.4  | 237.5  | CST2    | <a href="#">NM_001322.2</a> |                                     | cysteine           |             |             |
| GI_19882253-S | 4344.9 | 4342.7 | 2747.7 | CST3    | <a href="#">NM_000099.2</a> | AD8                                 | cysteine           |             |             |
| GI_19882254-S | 165.5  | 184.2  | 161.5  | CST4    | <a href="#">NM_001899.2</a> |                                     | cysteine           |             |             |
| GI_19882255-S | 96.6   | 118.3  | 106.6  | CST5    | <a href="#">NM_001900.2</a> |                                     | cysteine           |             |             |
| GI_19882257-S | 94.3   | 108.4  | 88.5   | CST8    | <a href="#">NM_005492.2</a> | CRES                                | cysteine           |             |             |
| GI_19882258-S | 106.6  | 113.4  | 103.6  | CSTL1   | <a href="#">NM_138283.1</a> | dJ322G13.4                          | cysteine           |             |             |
| GI_19913344-S | 1494.7 | 1522.5 | 1570.8 | SLBP    | <a href="#">NM_006527.2</a> | HBP                                 | ribonucleo         | nucleus     | histone     |
| GI_19913345-I | 96.5   | 92.4   | 98.1   | WHSC1   | <a href="#">NM_014919.1</a> | NSD2;TRX5;MMSET;REIIBP;KIAA1090     |                    |             | embryoge    |
| GI_19913355-I | 146.1  | 168.8  | 137.7  | WHSC1   | <a href="#">NM_133334.1</a> | NSD2;TRX5;MMSET;REIIBP;KIAA1090     |                    |             | embryoge    |
| GI_19913359-S | 1768.7 | 1476   | 1927.6 | TBL1X   | <a href="#">NM_005647.2</a> | EBI;TBL1                            | heterotrim         | peripheral  | hearing     |
| GI_19913360-A | 271.8  | 245.6  | 211.9  | WHSC1   | <a href="#">NM_133336.1</a> | NSD2;TRX5;MMSET;REIIBP;KIAA1090     |                    |             | embryoge    |
| GI_19913360-I | 108.4  | 116.9  | 108.4  | WHSC1   | <a href="#">NM_133336.1</a> | NSD2;TRX5;MMSET;REIIBP;KIAA1090     |                    |             | embryoge    |
| GI_19913362-S | 328.9  | 330    | 300.9  | WHSC2   | <a href="#">NM_005663.2</a> | NELFA;FLJ10442;FLJ25112;P/OKcl.15   |                    |             | developm    |
| GI_19913366-A | 100.8  | 103    | 98.3   | TBL1Y   | <a href="#">NM_134259.1</a> | TBL1                                |                    |             |             |
| GI_19913368-S | 493.1  | 615.2  | 497.5  | TBL3    | <a href="#">NM_006453.2</a> | SAZD                                | receptor           |             | G-protein   |
| GI_19913370-S | 1104.7 | 1132.7 | 988.4  | IRA1    | <a href="#">NM_024665.2</a> | C21;DC42;TBLR1;FLJ12894             |                    |             |             |
| GI_19913380-A | 98.5   | 101.6  | 100.9  | C6orf25 | <a href="#">NM_138275.1</a> | G6b;NG31                            |                    |             |             |
| GI_19913382-I | 311.2  | 350.2  | 310.1  | C6orf25 | <a href="#">NM_138276.1</a> | G6b;NG31                            |                    |             |             |
| GI_19913384-I | 92.4   | 94.9   | 96.5   | C6orf25 | <a href="#">NM_138277.1</a> | G6b;NG31                            |                    |             |             |
| GI_19913386-S | 119.5  | 135.6  | 116.3  | GRAP2   | <a href="#">NM_004810.2</a> | P38;GADS;GRID;GRPL;GrbX;Mona;GRB2L; | SH3/SH2            | cytoplasm   | RAS         |
| GI_19913387-S | 106.1  | 136.3  | 111.5  | GRAP    | <a href="#">NM_006613.2</a> |                                     | SH3/SH2            | cytoplasm   | RAS         |

|               |        |        |        |           |                             |                                      |            |             |            |
|---------------|--------|--------|--------|-----------|-----------------------------|--------------------------------------|------------|-------------|------------|
| GI_19913388-I | 115.2  | 138    | 129.7  | RGS3      | <a href="#">NM_021106.2</a> | C2PA;RGP3;FLJ20370;PDZ-RGS3          | GTPase     | cytosol     | regulation |
| GI_19913391-A | 3222.4 | 3486.7 | 1850.9 | RGS3      | <a href="#">NM_134427.1</a> | C2PA;RGP3;FLJ20370;PDZ-RGS3          | GTPase     | cytosol     | regulation |
| GI_19913391-I | 164.4  | 179.2  | 165.1  | RGS3      | <a href="#">NM_134427.1</a> | C2PA;RGP3;FLJ20370;PDZ-RGS3          | GTPase     | cytosol     | regulation |
| GI_19913393-A | 273.7  | 326.1  | 382.6  | SMTN      | <a href="#">NM_006932.3</a> |                                      | structural | cytoskelet  | muscle     |
| GI_19913395-I | 355.4  | 438.8  | 512.8  | SMTN      | <a href="#">NM_134269.1</a> |                                      | structural | cytoskelet  | muscle     |
| GI_19913399-I | 81.5   | 79.4   | 79.6   | SLCO1A2   | <a href="#">NM_021094.2</a> | OATP;OATP-A;OATP1A2;SLC21A3          | organic    | integral to | organic    |
| GI_19913400-A | 114.7  | 141.6  | 122.8  | SLCO1A2   | <a href="#">NM_005075.2</a> | OATP;OATP-A;OATP1A2;SLC21A3          | organic    | integral to | organic    |
| GI_19913400-I | 578.2  | 722.9  | 644.2  | SLCO1A2   | <a href="#">NM_005075.2</a> | OATP;OATP-A;OATP1A2;SLC21A3          | organic    | integral to | organic    |
| GI_19913402-I | 81.9   | 90.5   | 79     | SLCO1A2   | <a href="#">NM_134431.1</a> | OATP;OATP-A;OATP1A2;SLC21A3          | organic    | integral to | organic    |
| GI_19913404-S | 2529.8 | 1607.7 | 2029.2 | TOP1      | <a href="#">NM_003286.2</a> | TOPI                                 | DNA        |             | DNA        |
| GI_19913405-S | 1628.9 | 1717.6 | 1644.6 | TOP2A     | <a href="#">NM_001067.2</a> | TOP2;TP2A                            | DNA        | nucleus     | DNA        |
| GI_19913407-S | 1825.1 | 1966.5 | 1585.9 | TOP2B     | <a href="#">NM_001068.2</a> | TOPIIB                               | DNA        | nucleus     | DNA        |
| GI_19913411-A | 858.1  | 1314   | 1372.3 | MVP       | <a href="#">NM_005115.3</a> | LRP;VAULT1                           |            | ribonucleo  | drug       |
| GI_19913413-I | 152.4  | 167.7  | 149    | AP2A1     | <a href="#">NM_014203.2</a> | ADTAA;CLAPA1;AP2-ALPHA               | protein    | coated pit  | nonselecti |
| GI_19913415-A | 284.1  | 342.1  | 314.8  | AP2A1     | <a href="#">NM_130787.2</a> | ADTAA;CLAPA1;AP2-ALPHA               | protein    | coated pit  | nonselecti |
| GI_19913417-S | 1234   | 1584.5 | 2026.3 | ATP6V0A1  | <a href="#">NM_005177.2</a> | a1;Stv1;VPP1;Vph1;ATP6N1;ATP6N1A     | hydrogen   | coated      | proton     |
| GI_19913419-A | 106.7  | 122.6  | 128.4  | ATP6V0A4  | <a href="#">NM_130840.1</a> | a4;Stv1;VPP2;Vph1;RTA1C;RTADR;ATP6N2 |            |             |            |
| GI_19913421-I | 153.3  | 190.3  | 159.2  | ATP6V0A4  | <a href="#">NM_130841.1</a> | a4;Stv1;VPP2;Vph1;RTA1C;RTADR;ATP6N2 |            |             |            |
| GI_19913423-S | 3531.1 | 3895.9 | 3507.9 | ATP6V1A   | <a href="#">NM_001690.2</a> | HO68;VA68;VPP2;Vma1;ATP6A1;ATP6V1A1  | ATP-       | vacuolar    | small      |
| GI_19913425-S | 125.4  | 134.6  | 146.8  | ATP6V1B1  | <a href="#">NM_001692.2</a> | VATB;VPP3;Vma2;RTA1B;ATP6B1          | ATP-       | vacuolar    | proton     |
| GI_19913427-S | 4816.2 | 4018.3 | 4870.3 | ATP6V1B2  | <a href="#">NM_001693.2</a> | HO57;VATB;VPP3;Vma2;ATP6B2;ATP6B1B   | hydrogen   | vacuolar    | proton     |
| GI_19913429-S | 4498.2 | 5103.8 | 4235.5 | ATP5J     | <a href="#">NM_001685.3</a> | ATP5;ATPM;ATP5A                      | adenosine  | mitochond   | energy     |
| GI_19913430-S | 585.7  | 727.2  | 770.5  | ATP6V1C1  | <a href="#">NM_001695.2</a> | VATC;Vma5;ATP6C;ATP6D;FLJ20057       | hydrogen-  | vacuolar    | proton     |
| GI_19913433-S | 3472   | 4734.1 | 5585.5 | ATP6V1E1  | <a href="#">NM_001696.2</a> | P31;Vma4;ATP6E;ATP6E2;ATP6V1E        | hydrogen-  | vacuolar    | proton     |
| GI_19913434-S | 3207.6 | 3992.8 | 4096.8 | ATP6V0B   | <a href="#">NM_004047.2</a> | ATP6F;HATPL;VMA16                    | adenosine  | vacuolar    | proton     |
| GI_19913435-S | 3842.8 | 5325.2 | 5498.3 | ATP6V0E   | <a href="#">NM_003945.2</a> | M9.2;ATP6H;Vma21;Vma21p              | adenosine  | vacuolar    | proton     |
| GI_19913436-S | 7883.2 | 9954.8 | 10477  | ATP6V0C   | <a href="#">NM_001694.2</a> | ATPL;VATL;Vma3;ATP6C;ATP6L           | hydrogen   | vacuolar    | proton     |
| GI_19913437-S | 3006.3 | 3968.3 | 4423.9 | ATP6V1D   | <a href="#">NM_015994.2</a> | VATD;VMA8;ATP6M                      |            |             |            |
| GI_19913440-A | 7239.7 | 15979  | 24778  | HPCAL1    | <a href="#">NM_002149.2</a> | BDR1;HLP2;VILIP-3                    | calcium    | cytosol     | vesicle-   |
| GI_19913440-I | 229    | 408.8  | 581.4  | HPCAL1    | <a href="#">NM_002149.2</a> | BDR1;HLP2;VILIP-3                    | calcium    | cytosol     | vesicle-   |
| GI_19913442-I | 135.1  | 140.5  | 152.5  | HPCAL1    | <a href="#">NM_134421.1</a> | BDR1;HLP2;VILIP-3                    | calcium    | cytosol     | vesicle-   |
| GI_19913444-S | 107.5  | 113.7  | 109.5  | HPCAL4    | <a href="#">NM_016257.2</a> | HLP4;DKFZp761G122                    | calcium    |             | central    |
| GI_19913445-S | 117.2  | 123.6  | 123.2  | HPCA      | <a href="#">NM_002143.2</a> | BDR2                                 | binding    | cytosol     | vesicle-   |
| GI_19920316-S | 3191.7 | 3502.5 | 2666.5 | CKAP4     | <a href="#">NM_006825.2</a> | P63;CLIMP-63                         |            | integral to | nonselecti |
| GI_19920322-A | 652.9  | 657.2  | 634.4  | CDW92     | <a href="#">NM_022109.2</a> | CTL1;CHTL1                           |            |             |            |
| GI_19923075-S | 290.4  | 314.9  | 301.4  | ACTRT1    | <a href="#">NM_138289.1</a> | ARP-T1;MGC26590                      | structural | actin       |            |
| GI_19923077-S | 110.1  | 119.5  | 103.8  | LOC148213 | <a href="#">NM_138286.1</a> | FLJ31526                             |            | nucleus     |            |
| GI_19923079-I | 202.6  | 250.3  | 198.7  | BNIP1     | <a href="#">NM_138278.1</a> | PP753;BNIP-S;BNIP1;BNIP2;BNIP-       |            |             |            |
| GI_19923081-S | 295.9  | 388.8  | 311.8  | PATE      | <a href="#">NM_138294.1</a> |                                      | phospholi  |             | electron   |
| GI_19923085-S | 322.6  | 389.4  | 371.1  | NS3BP     | <a href="#">NM_138291.1</a> |                                      |            |             |            |
| GI_19923089-S | 102.6  | 99.1   | 101.6  | RPIB9     | <a href="#">NM_138290.1</a> | RPIB9;FLJ30671;MGC26655              |            |             |            |
| GI_19923095-S | 157.4  | 190.4  | 170.3  | CRLF2     | <a href="#">NM_022148.2</a> | CRLF2;TSLPR;CRLF2Y                   | receptor   | integral to |            |
| GI_19923101-S | 271.3  | 323.8  | 291.1  | HLCS      | <a href="#">NM_000411.3</a> | HCS                                  | biotin-    |             | protein    |
| GI_19923110-S | 104    | 108.5  | 162.1  | IGFBP3    | <a href="#">NM_000598.2</a> |                                      |            |             |            |

|               |        |        |        |          |                             |                                     |             |                       |
|---------------|--------|--------|--------|----------|-----------------------------|-------------------------------------|-------------|-----------------------|
| GI_19923111-S | 109.9  | 107.8  | 100.5  | IGF1     | <a href="#">NM_000618.2</a> |                                     |             |                       |
| GI_19923121-S | 125.4  | 141.1  | 120.4  | CHRNA3   | <a href="#">NM_000743.2</a> |                                     | nicotinic   | nicotinic small       |
| GI_19923125-S | 253.6  | 295    | 254.3  | GNRH1    | <a href="#">NM_000825.2</a> | GRH;GNRH;LHRH;LNRH                  | luteinizing | soluble negative      |
| GI_19923128-S | 100    | 130.6  | 92.2   | IFNAR2   | <a href="#">NM_000874.2</a> | IFNABR                              | interferon- | extracellul JAK-STAT  |
| GI_19923130-S | 596.2  | 624.5  | 476.6  | PPP3CA   | <a href="#">NM_000944.2</a> | CALN;CCN1;CNA1;CALNA;PPP2B;CALNA1   | protein     | calcineurin protein   |
| GI_19923133-S | 467.7  | 526    | 544.5  | CHUK     | <a href="#">NM_001278.2</a> | IKK1;IKKA;IKBKA;TCF16;NFKBIKA;IKK-  | IkappaB     | cytoplasm I-kappaB    |
| GI_19923135-S | 89.2   | 94.7   | 98.9   | CX3CR1   | <a href="#">NM_001337.2</a> | V28;CCRL1;GPR13;CMKDR1;GPRV28;CMK   | chemokine   | integral to virulence |
| GI_19923138-S | 107.6  | 124.4  | 95.9   | ID4      | <a href="#">NM_001546.2</a> |                                     | transcripti | nucleus regulation    |
| GI_19923143-S | 142.3  | 184.6  | 173    | MYD88    | <a href="#">NM_002468.2</a> |                                     | death       | cell                  |
| GI_19923154-S | 273.3  | 308.9  | 282.4  | SH3BP2   | <a href="#">NM_003023.2</a> | CRBM;CRPM;RES4-23                   | SH3/SH2     | signal                |
| GI_19923156-S | 161.3  | 197.2  | 167.2  | SLC6A12  | <a href="#">NM_003044.2</a> | BGT1;BGT-1                          | betaine/G   | integral to small     |
| GI_19923159-S | 395.1  | 325.8  | 232.5  | SNAPC1   | <a href="#">NM_003082.2</a> | SNAP43;PTFgamma                     |             | transcripti           |
| GI_19923163-S | 422.7  | 390.2  | 361.1  | TMEM1    | <a href="#">NM_003274.2</a> | EHOC1;GT334;EHOC-1                  | sodium      | Golgi sodium          |
| GI_19923175-S | 1361.3 | 1178.7 | 1128.3 | SLC4A7   | <a href="#">NM_003615.2</a> | NBC2;NBC3;SBC2;SLC4A6               |             |                       |
| GI_19923177-S | 165.8  | 213.6  | 202.1  | C22orf19 | <a href="#">NM_003678.2</a> | Fmip;PK1.3                          |             | tumor                 |
| GI_19923180-S | 123.5  | 137    | 128.7  | PDLIM4   | <a href="#">NM_003687.2</a> | RIL                                 | tumor       | nucleus intracellula  |
| GI_19923194-S | 126.5  | 155.9  | 110    | CEACAM1  | <a href="#">NM_001712.2</a> | BGP;BGP1;BGPI;CD66;CD66A            | tumor       | membran immune        |
| GI_19923197-S | 1091.8 | 728.3  | 768.8  | RUNX1    | <a href="#">NM_001754.2</a> | AML1;CBFA2;AMLCR1;PEBP2A2;PEBP2aB   | transcripti | nucleus oncogene      |
| GI_19923201-S | 225.6  | 205    | 214.8  | EZH1     | <a href="#">NM_001991.2</a> | KIAA0388                            | chromatin   | nucleus embryoge      |
| GI_19923203-S | 98.3   | 94.2   | 98.3   | GLP1R    | <a href="#">NM_002062.2</a> |                                     | transmem    | integral to adenylate |
| GI_19923214-S | 272    | 225.9  | 206.7  | MEF2C    | <a href="#">NM_002397.2</a> |                                     | RNA         | nucleus muscle        |
| GI_19923216-S | 230.9  | 283.8  | 315.7  | MKI67    | <a href="#">NM_002417.2</a> | KIA                                 | ATP         | nucleolus regulation  |
| GI_19923222-S | 240.5  | 198.2  | 210.7  | NFKB2    | <a href="#">NM_002502.2</a> | LYT10;LYT-10                        | transcripti | nucleus oncogene      |
| GI_19923224-S | 85.8   | 104    | 99.3   | OMG      | <a href="#">NM_002544.2</a> | OMGP                                | cell        | membran cell          |
| GI_19923232-S | 1320.4 | 2075.3 | 1926   | SCP2     | <a href="#">NM_002979.2</a> | SCPX                                | sterol      | peroxisom steroid     |
| GI_19923235-S | 5451.2 | 6062   | 6574.4 | SP100    | <a href="#">NM_003113.2</a> |                                     | DNA         | kinesin regulation    |
| GI_19923241-S | 352.6  | 392    | 387    | ZFP161   | <a href="#">NM_003409.2</a> | ZF5;ZNF478                          | protein     | nucleus negative      |
| GI_19923243-S | 4298.5 | 4410.4 | 4593.1 | ARHGAP1  | <a href="#">NM_004308.2</a> | RHOGAP;RHOGAP1;CDC42GAP             | SH3/SH2     | Rho                   |
| GI_19923244-S | 137.5  | 155.8  | 133.5  | CRHR1    | <a href="#">NM_004382.2</a> | CRF1;CRHR;CRF-R;CRFR1               | corticotrop | integral to adenylate |
| GI_19923246-S | 463.3  | 387.9  | 294.8  | CRY1     | <a href="#">NM_004075.2</a> | PHLL1                               | G-protein   | mitochond circadian   |
| GI_19923256-S | 100.4  | 92.5   | 91.7   | TRPC6    | <a href="#">NM_004621.3</a> | TRP6                                | nonselecti  | integral to cation    |
| GI_19923257-S | 1625.5 | 2284.1 | 2426.7 | PFKFB4   | <a href="#">NM_004567.2</a> |                                     | fructose-   | cellular_co fructose  |
| GI_19923259-S | 206.5  | 403.4  | 270.4  | RAB4A    | <a href="#">NM_004578.2</a> | RAB4                                | RAB small   | nonselecti            |
| GI_19923267-S | 2600.9 | 2267.4 | 2130.4 | PRKRIR   | <a href="#">NM_004705.2</a> | DAP4;P52rIPK                        | protein     | negative              |
| GI_19923271-S | 390.8  | 466.7  | 447.3  | XPR1     | <a href="#">NM_004736.2</a> | X3;SYG1                             | G-protein   | integral to pathogene |
| GI_19923273-S | 343.6  | 429.5  | 405.5  | DLGAP1   | <a href="#">NM_004746.2</a> | GKAP;DAP-1;SAPAP1;DAP-1-BETA;DAP-1- | protein     | membran synaptic      |
| GI_19923275-S | 182.1  | 205.5  | 182.2  | CD163    | <a href="#">NM_004244.2</a> | M130;MM130                          | scavenger   | membran antimicrob    |
| GI_19923278-S | 735.1  | 1031.4 | 1031.7 | SEMA4F   | <a href="#">NM_004263.2</a> | SEMAM;SEMAW;M-SEMA;PRO2353;m-       |             | membran axon          |
| GI_19923280-S | 510.4  | 495.7  | 636.4  | CHST3    | <a href="#">NM_004273.2</a> | C6ST;C6ST1                          | sulfotransf | Golgi                 |
| GI_19923286-S | 658.5  | 632.8  | 661.9  | ATBF1    | <a href="#">NM_006885.2</a> |                                     | RNA         | nucleus transcripti   |
| GI_19923288-S | 1980.3 | 2863.5 | 1266.3 | PIK3CD   | <a href="#">NM_005026.2</a> | p110D                               | phosphati   | phosphoin protein     |
| GI_19923304-S | 814.8  | 662.8  | 517.8  | GTF2H1   | <a href="#">NM_005316.2</a> | BTF2;TFIIH                          |             |                       |
| GI_19923305-S | 107.3  | 136.7  | 103.2  | INMT     | <a href="#">NM_006774.3</a> |                                     | methyltran  |                       |
| GI_19923309-S | 118.4  | 136.3  | 134.5  | MCF2     | <a href="#">NM_005369.2</a> | DBL                                 | guanyl-     | cytosol oncogene      |

|               |        |        |                |                             |                                      |               |              |              |
|---------------|--------|--------|----------------|-----------------------------|--------------------------------------|---------------|--------------|--------------|
| GI_19923318-S | 81.4   | 73.4   | 73 TLX1        | <a href="#">NM_005521.2</a> | TCL3;HOX11                           | transcripti   | nucleus      | oncogene     |
| GI_19923320-S | 4493   | 3068.2 | 3935 KIFC3     | <a href="#">NM_005550.2</a> |                                      | microtubul    | kinesin      | vision       |
| GI_19923322-S | 291.8  | 402.6  | 467 MADH6      | <a href="#">NM_005585.2</a> | MADH7;SMAD6;HsT17432                 | inhibitory    | intracellula | regulation   |
| GI_19923324-S | 201.1  | 210    | 224.1 EVI5     | <a href="#">NM_005665.2</a> | NB4S                                 | protein       | membran      | developm     |
| GI_19923326-S | 1329   | 1479.6 | 1910.8 NET1    | <a href="#">NM_005863.2</a> | NET1A;ARHGEF8                        | guanyl-       |              | signal       |
| GI_19923328-S | 438.2  | 544.9  | 462.9 NHLH1    | <a href="#">NM_005598.2</a> | HEN1;NSCL;NSCL1                      | DNA           |              | central      |
| GI_19923329-S | 5049.5 | 4422.8 | 4302.4 CTDSP2  | <a href="#">NM_005730.2</a> | OS4;SCP2                             |               | soluble      | oncogene     |
| GI_19923332-S | 99.7   | 99.3   | 103.6 FARSLB   | <a href="#">NM_005687.2</a> | FRSB;PheHB                           | phenylala     | soluble      | phenylala    |
| GI_19923334-S | 390.7  | 336.4  | 326.2 SCAM-1   | <a href="#">NM_005775.2</a> |                                      | structural    | focal        | cell         |
| GI_19923342-S | 967.3  | 1216.6 | 1153.2 CITED2  | <a href="#">NM_006079.2</a> | MRG1;P35SRJ                          | transcripti   | nucleus      | regulation   |
| GI_19923347-S | 1077.8 | 912.1  | 764 NAB1       | <a href="#">NM_005966.2</a> |                                      | transcripti   | nucleus      | regulation   |
| GI_19923351-S | 226.3  | 235.5  | 296.2 NKX3-1   | <a href="#">NM_006167.2</a> | NKX3A;NKX3.1                         | transcripti   | nucleus      | oncogene     |
| GI_19923360-S | 140.7  | 158.2  | 149 RPP30      | <a href="#">NM_006413.2</a> | TSG15                                | ribonuclea    | nucleolar    | tRNA         |
| GI_19923361-S | 92.5   | 94.6   | 90.8 THY1      | <a href="#">NM_006288.2</a> | CD90                                 |               | integral to  |              |
| GI_19923363-S | 647.8  | 798.4  | 753.9 ARPP-19  | <a href="#">NM_006628.2</a> | ARPP16;ARPP19;ARPP-16                | potassium     | cytoplasm    | glucose      |
| GI_19923364-I | 101.6  | 116.6  | 108.7 DMRT2    | <a href="#">NM_006557.3</a> |                                      | transcripti   | nucleus      | male         |
| GI_19923365-S | 281.8  | 358.3  | 201.6 HPSE     | <a href="#">NM_006665.2</a> | HPA;HPR1;HSE1;HPSE1                  | beta-         |              | proteoglyc   |
| GI_19923366-S | 2342.6 | 3105.2 | 3107.9 MSF     | <a href="#">NM_006640.2</a> | MSF1;SEPT9;SINT1;PNUTL4;AF17q25;KIAA | GTPase        | cytoplasm    |              |
| GI_19923369-S | 895.2  | 1783   | 1233.5 JARID1B | <a href="#">NM_006618.2</a> | PUT1;PLU-1;RBBP2H1A                  | transcripti   | nucleus      | oncogene     |
| GI_19923371-S | 860.9  | 719.7  | 689.1 PVR      | <a href="#">NM_006505.2</a> | PVS;HVED;CD155;TAGE4                 | receptor      | integral to  | invasive     |
| GI_19923373-S | 124.4  | 142.3  | 128.2 HIVEP2   | <a href="#">NM_006734.2</a> | MBP-2;HIV-EP2                        | DNA           | nucleus      | regulation   |
| GI_19923380-S | 96.8   | 97.4   | 92.3 SCN3A     | <a href="#">NM_006922.2</a> | NAC3                                 | voltage-      | membran      | sodium       |
| GI_19923386-S | 5198.6 | 5166.2 | 4263.2 NCBP2   | <a href="#">NM_007362.2</a> | NIP1;CBP20                           | RNA cap       | nucleus      | snRNA-       |
| GI_19923388-S | 138.6  | 243.8  | 178.9 PLA2R1   | <a href="#">NM_007366.2</a> | PLA2R;PLA2-R;PLA2IR;PLA2G1R          | receptor      | integral to  | polysacch    |
| GI_19923392-S | 2161.6 | 2204.3 | 1659.6 RERE    | <a href="#">NM_012102.2</a> | ARG;ARP;DNB1;ATN1L;KIAA0458          | poly-         | nucleus      | NLS-         |
| GI_19923396-S | 130.7  | 1231.9 | 447.4 ITGA11   | <a href="#">NM_012211.2</a> | HsT18964                             | collagen      | integrin     | muscle       |
| GI_19923400-S | 94.5   | 90.9   | 89.9 SERPINB13 | <a href="#">NM_012397.2</a> | HUR7;PI13;headpin                    | serpin        | cellular_co  | response     |
| GI_19923401-S | 3828.7 | 2989.6 | 2530.9 PITPNB  | <a href="#">NM_012399.2</a> | VIB1B                                | phosphati     | intracellula | lipid        |
| GI_19923408-S | 1859.3 | 2285.5 | 1605.8 SERP1   | <a href="#">NM_014445.2</a> | RAMP4                                |               | ribosome     | plasma       |
| GI_19923412-S | 165.1  | 158.8  | 148 USP25      | <a href="#">NM_013396.2</a> | USP21                                | ubiquitin-    |              | deubiquiti   |
| GI_19923414-S | 201.5  | 252    | 229.4 HEYL     | <a href="#">NM_014571.2</a> |                                      | DNA           | nucleus      | embryoge     |
| GI_19923415-S | 264.3  | 305.1  | 260.4 DIS3     | <a href="#">NM_014953.2</a> | KIAA1008                             | exonuclea     | nucleus      | rRNA         |
| GI_19923419-S | 101.3  | 108.8  | 85.6 KIAA0998  | <a href="#">NM_015072.2</a> |                                      |               |              |              |
| GI_19923429-S | 134    | 125.8  | 120.5 COMMD5   | <a href="#">NM_014066.2</a> | HCARG;HT002                          |               |              |              |
| GI_19923431-S | 238.5  | 278.4  | 216.7 HSPC065  | <a href="#">NM_014157.2</a> | FLJ23555;DKFZP434N1418               |               |              |              |
| GI_19923436-S | 1732.4 | 2163.6 | 1896.9 AK3L1   | <a href="#">NM_016282.2</a> | AK3;AKL3L;AKL3L1                     | adenylate     | mitochond    |              |
| GI_19923439-S | 89.9   | 85.3   | 86.7 PDE11A    | <a href="#">NM_016953.2</a> | PDE11A1                              | 3',5'-cyclic- |              | signal       |
| GI_19923441-S | 1920   | 2326.3 | 2306.9 CGI-100 | <a href="#">NM_016040.2</a> |                                      | protein       | endoplas     | intracellula |
| GI_19923443-S | 635.6  | 678.9  | 798.9 CGI-141  | <a href="#">NM_016072.2</a> |                                      |               | integral to  | vesicle-     |
| GI_19923444-A | 145.5  | 130.5  | 125.4 SPG3A    | <a href="#">NM_015915.2</a> | FSP1;GBP3;SPG3;AD-FSP                | GTPase        | nucleus      | immune       |
| GI_19923448-S | 601.2  | 373.1  | 330.5 DREV1    | <a href="#">NM_016025.2</a> | DREV                                 |               |              |              |
| GI_19923450-S | 432.2  | 339.2  | 422.7 DCTN4    | <a href="#">NM_016221.2</a> |                                      |               | centrosom    |              |
| GI_19923451-S | 531.2  | 507.7  | 335.2 LEF1     | <a href="#">NM_016269.2</a> | TCF1ALPHA                            | DNA           | nucleus      | regulation   |
| GI_19923454-S | 182.2  | 150.4  | 146.7 PLCE1    | <a href="#">NM_016341.2</a> | PLCE;KIAA1516                        |               |              |              |

|               |        |        |        |           |                             |                                       |             |             |                       |
|---------------|--------|--------|--------|-----------|-----------------------------|---------------------------------------|-------------|-------------|-----------------------|
| GI_19923458-S | 1729.4 | 1822.1 | 1630.2 | PAIP2     | <a href="#">NM_016480.2</a> |                                       |             |             |                       |
| GI_19923461-S | 931.5  | 975.8  | 539.2  | BHC80     | <a href="#">NM_016621.2</a> | BM-006;KIAA1696                       |             |             |                       |
| GI_19923463-S | 110.8  | 90.2   | 90.3   | JKK       | <a href="#">NM_016281.2</a> | DPK                                   | protein     |             | JNK                   |
| GI_19923465-S | 1223.7 | 1373.2 | 1002.5 | SRRM2     | <a href="#">NM_016333.2</a> | 300-KD;SRL300;SRM300;KIAA0324         |             |             |                       |
| GI_19923467-S | 1103   | 1153.8 | 952.6  | PRKD2     | <a href="#">NM_016457.2</a> | PKD2;HSPC187;DKFZp586E0820            | ATP         |             | intracellular protein |
| GI_19923478-S | 290.1  | 326.8  | 247.5  | SUFU      | <a href="#">NM_016169.2</a> | SUFUH;SUFUXL                          | transcripti | cytoplasm   | nucleocyto            |
| GI_19923482-S | 144.6  | 152.4  | 149.6  | RAB14     | <a href="#">NM_016322.2</a> | DKFZp762K0911                         | GTP         | cellular_co | small                 |
| GI_19923484-S | 204.8  | 213.9  | 184.6  | LUC7A     | <a href="#">NM_016424.2</a> | CROP                                  |             | nucleus     | RNA                   |
| GI_19923486-S | 86.7   | 75.3   | 82.6   | MYOZ2     | <a href="#">NM_016599.2</a> | CS-1;C4orf5                           |             |             |                       |
| GI_19923492-S | 465.9  | 387.1  | 427.1  | PEPP2     | <a href="#">NM_019012.2</a> | FLJ10667;KIAA1686                     |             |             |                       |
| GI_19923494-S | 901    | 1122.6 | 913.6  | MTRF1L    | <a href="#">NM_019041.2</a> |                                       | translation |             | translation           |
| GI_19923496-S | 1029.7 | 1116.9 | 896.1  | EML4      | <a href="#">NM_019063.2</a> | C2orf2;ELP120;ROPP120;FLJ10942        |             |             |                       |
| GI_19923500-S | 250.4  | 273.4  | 191.7  | FLJ20445  | <a href="#">NM_017824.2</a> |                                       |             |             |                       |
| GI_19923501-S | 2700.2 | 2474.2 | 2491   | p66alpha  | <a href="#">NM_017660.2</a> | FLJ20085                              |             |             |                       |
| GI_19923511-S | 91.2   | 109.1  | 89.7   | C14orf119 | <a href="#">NM_017924.2</a> | FLJ20671                              |             |             |                       |
| GI_19923513-S | 461.9  | 512.7  | 546.2  | ESRRBL1   | <a href="#">NM_018010.2</a> | HIPPI;MHS4R2;FLJ10147                 |             |             |                       |
| GI_19923516-S | 239.4  | 193.7  | 233.8  | FLJ10520  | <a href="#">NM_018124.2</a> |                                       |             |             |                       |
| GI_19923518-S | 159.9  | 194.2  | 199    | RCBTB1    | <a href="#">NM_018191.2</a> | CLLD7;CLLL7;FLJ10716                  | protein     |             |                       |
| GI_19923520-S | 422.1  | 451.2  | 448    | CKAP2     | <a href="#">NM_018204.2</a> | LB1;TMAP;se20-10;FLJ10749             |             |             |                       |
| GI_19923522-S | 133.4  | 127.6  | 113.3  | QRSL1     | <a href="#">NM_018292.2</a> | GatA;FLJ10989;FLJ12189;FLJ13447;DKFZP |             |             |                       |
| GI_19923528-S | 373.1  | 391.8  | 341.4  | WDR33     | <a href="#">NM_018383.2</a> | WDC146;FLJ11294                       |             |             |                       |
| GI_19923532-S | 280.7  | 251.7  | 306.8  | PI4KII    | <a href="#">NM_018425.2</a> | DKFZP761G1923                         | inositol/ph |             |                       |
| GI_19923535-S | 383.6  | 400.1  | 322.5  | ERMAP     | <a href="#">NM_018538.2</a> | PRO2801                               |             |             |                       |
| GI_19923537-S | 769.3  | 893.7  | 748.1  | VEZATIN   | <a href="#">NM_017599.2</a> | DKFZp761C241                          |             |             | kinesin               |
| GI_19923539-S | 247.3  | 386.6  | 289    | UPLC1     | <a href="#">NM_017707.2</a> | FLJ20199                              | binding     | nucleus     | transport             |
| GI_19923541-S | 515.7  | 516.6  | 497.8  | URG4      | <a href="#">NM_017920.2</a> | FLJ20654;KIAA1507                     |             |             |                       |
| GI_19923547-S | 295.2  | 252.8  | 276.7  | CENPJ     | <a href="#">NM_018451.2</a> | LAP;CPAP;LIP1;BM032                   |             |             |                       |
| GI_19923550-S | 516.7  | 480.9  | 444.6  | LANCL2    | <a href="#">NM_018697.2</a> | TASP;GPR69B                           | translation | eukaryotic  | translation           |
| GI_19923554-S | 766.4  | 745.6  | 609.3  | LOC56270  | <a href="#">NM_019613.2</a> |                                       |             |             |                       |
| GI_19923555-S | 881.1  | 658.9  | 636.3  | AD-020    | <a href="#">NM_020141.2</a> |                                       |             |             |                       |
| GI_19923558-S | 209.4  | 262.9  | 258    | C11orf30  | <a href="#">NM_020193.2</a> | EMSY;GL002                            |             |             |                       |
| GI_19923563-S | 111.7  | 119.8  | 124.5  | SENP7     | <a href="#">NM_020654.2</a> | KIAA1707                              | cysteine-   | nucleus     | protein               |
| GI_19923565-S | 926.9  | 921.8  | 886    | SCYL1     | <a href="#">NM_020680.2</a> | GKLP;NKTL;NTKL;P105;TAPK;TRAP;HT019   |             |             |                       |
| GI_19923567-S | 769.6  | 802    | 738.9  | ZNF317    | <a href="#">NM_020933.2</a> | KIAA1588                              | DNA         | nucleus     | regulation            |
| GI_19923571-S | 451.9  | 475.7  | 143.3  | SLAMF7    | <a href="#">NM_021181.3</a> | 19A;CS1;CRACC                         |             |             |                       |
| GI_19923579-S | 91.1   | 93     | 89.4   | FLJ11785  | <a href="#">NM_021930.2</a> | RINT1;RINT-1                          |             |             |                       |
| GI_19923589-S | 877.4  | 925.9  | 842.4  | FLJ21657  | <a href="#">NM_022483.2</a> |                                       |             |             |                       |
| GI_19923594-S | 227.7  | 272    | 212.4  | DDX54     | <a href="#">NM_024072.2</a> | DP97;APR-5;MGC2835                    |             |             |                       |
| GI_19923596-S | 1152.4 | 1133.3 | 1270.7 | SAP130    | <a href="#">NM_024545.2</a> | FLJ12761                              |             |             |                       |
| GI_19923598-S | 961.1  | 956    | 1114.8 | CLMN      | <a href="#">NM_024734.2</a> | calmin;FLJ12383;KIAA1188              | actin       |             | integral to           |
| GI_19923602-S | 822.8  | 732    | 611    | CYBRD1    | <a href="#">NM_024843.2</a> | DCYTB;FLJ23462                        |             |             | integral to           |
| GI_19923608-S | 502.6  | 437.3  | 495.7  | JADE1     | <a href="#">NM_024900.2</a> | FLJ22479;KIAA1807                     | DNA         |             | regulation            |
| GI_19923612-S | 2512.8 | 2288.2 | 2062.7 | FLJ21128  | <a href="#">NM_025083.2</a> |                                       | molecular   |             |                       |
| GI_19923616-S | 1821.6 | 1727.9 | 1454   | FLJ22175  | <a href="#">NM_025161.2</a> |                                       |             |             |                       |

|               |        |        |        |            |                             |                                       |                  |                                           |
|---------------|--------|--------|--------|------------|-----------------------------|---------------------------------------|------------------|-------------------------------------------|
| GI_19923618-S | 418.5  | 588.9  | 600.3  | C1orf22    | <a href="#">NM_025191.2</a> |                                       |                  |                                           |
| GI_19923620-S | 544.3  | 370.8  | 683.3  | HSD3B7     | <a href="#">NM_025193.2</a> | PFIC4                                 |                  |                                           |
| GI_19923628-I | 140.3  | 148.8  | 132.9  | SPAP1      | <a href="#">NM_030764.2</a> | FCRH2;IFGP4;IRTA4;SPAP1A;SPAP1B;SPA   |                  |                                           |
| GI_19923630-S | 101.3  | 98.3   | 85.6   | OR51E2     | <a href="#">NM_030774.2</a> | PSGR                                  | olfactory        | integral to olfaction                     |
| GI_19923633-S | 961.5  | 1010.8 | 1043.1 | SLC25A28   | <a href="#">NM_031212.2</a> | MRS3/4;NPD016                         | binding          | mitochondrion transport                   |
| GI_19923635-S | 112.6  | 113.8  | 112.2  | PMCHL1     | <a href="#">NM_031887.2</a> |                                       |                  |                                           |
| GI_19923637-S | 99.9   | 116.1  | 111.6  | GPR61      | <a href="#">NM_031936.2</a> | BALGR;GPCR3                           | G-protein        | integral to G-protein                     |
| GI_19923645-S | 148.8  | 154    | 132.7  | DRCTNNB1A  | <a href="#">NM_032581.2</a> |                                       |                  |                                           |
| GI_19923649-S | 260.5  | 306.6  | 286.6  | ZNF607     | <a href="#">NM_032689.2</a> | FLJ14802;MGC13071                     |                  | nucleus                                   |
| GI_19923651-S | 264.1  | 331.2  | 353.9  | C9orf54    | <a href="#">NM_032809.2</a> | FLJ00199;FLJ14596                     |                  |                                           |
| GI_19923652-I | 2027.3 | 1348.2 | 1359.1 | PSIP1      | <a href="#">NM_033222.2</a> | p52;p75;PAIP;DFS70;LEDGF;PSIP2        | DNA              | nucleus regulation                        |
| GI_19923654-S | 1709.9 | 3056.8 | 2988.4 | DPYSL2     | <a href="#">NM_001386.3</a> | DRP2;CRMP2;DRP-2;DHPRP2               | dihydropyridine  | nucleobases                               |
| GI_19923657-S | 1501   | 1241.7 | 755.1  | C20orf72   | <a href="#">NM_052865.2</a> | FLJ14597;bA504H3.4                    |                  |                                           |
| GI_19923658-S | 212.1  | 245.6  | 218.4  | LOXL4      | <a href="#">NM_032211.5</a> | LOXC;FLJ21889                         | protein-         | membrane                                  |
| GI_19923660-S | 228.2  | 227.6  | 200.5  | NCOA6IP    | <a href="#">NM_024831.5</a> | PIMT;PIPMT;FLJ22995                   | S-               |                                           |
| GI_19923668-S | 190.3  | 217.1  | 223    | SEL1L      | <a href="#">NM_005065.3</a> | IBD2;SEL1-LIKE                        |                  |                                           |
| GI_19923670-S | 2803.3 | 2533.6 | 2123.4 | FOXP1      | <a href="#">NM_032682.3</a> | QRF1;MGC12942                         |                  |                                           |
| GI_19923712-A | 138.4  | 140.2  | 131.8  | BNIP1      | <a href="#">NM_138279.1</a> | PP753;BNIP-S;BNIP1;BNIP2;BNIP-        |                  |                                           |
| GI_19923712-I | 105.6  | 101.6  | 100.7  | BNIP1      | <a href="#">NM_138279.1</a> | PP753;BNIP-S;BNIP1;BNIP2;BNIP-        |                  |                                           |
| GI_19923714-S | 407    | 191.8  | 136.5  | IL17D      | <a href="#">NM_138284.1</a> | IL27;IL-22;IL-27;IL-17D               |                  |                                           |
| GI_19923718-S | 389.3  | 596.1  | 519.4  | C14orf147  | <a href="#">NM_138288.1</a> | MGC24447                              |                  |                                           |
| GI_19923720-S | 107.1  | 133.7  | 92.6   | PTCRA      | <a href="#">NM_138296.1</a> | PTA;PT-ALPHA                          |                  |                                           |
| GI_19923722-S | 1765.8 | 2114.2 | 1626.1 | RPS6KC1    | <a href="#">NM_012424.2</a> | RPK118;humS6PKh1                      | protein          | signal                                    |
| GI_19923724-S | 4569.2 | 4839.5 | 4164.2 | ANAPC11    | <a href="#">NM_016476.9</a> | APC11;Apc11p;HSPC214                  |                  | nucleus cell cycle                        |
| GI_19923725-S | 291.4  | 324.2  | 928.6  | NOV        | <a href="#">NM_002514.2</a> | CCN3;NOVH;IGFBP9                      | insulin-like     | extracellular regulation                  |
| GI_19923728-S | 332.4  | 320.6  | 267.1  | AD158      | <a href="#">NM_032270.2</a> | DKFZp586J1119                         |                  |                                           |
| GI_19923737-S | 684    | 735.1  | 756.1  | PRPS1      | <a href="#">NM_002764.2</a> | PRSI;PRS I                            | ribose-          | purine                                    |
| GI_19923741-S | 762.8  | 1041.7 | 1062.8 | BECN1      | <a href="#">NM_003766.2</a> |                                       |                  | kinesin anti-                             |
| GI_19923742-S | 5470.7 | 2945.3 | 4450   | SQSTM1     | <a href="#">NM_003900.2</a> | p60;p62;PDB3;ZIP3                     | molecular        | cytosol transmembrane                     |
| GI_19923749-S | 201.6  | 195.8  | 199.9  | RAB3B      | <a href="#">NM_002867.2</a> |                                       | RAB small        | nonselective                              |
| GI_19923751-S | 568.7  | 689.4  | 761.9  | RPA3       | <a href="#">NM_002947.2</a> | REPA3                                 | single-          | DNA DNA                                   |
| GI_19923752-S | 133.2  | 160.2  | 130.3  | SLC16A1    | <a href="#">NM_003051.2</a> | MCT;MCT1                              | mevalonate       | integral to mevalonate                    |
| GI_19923760-S | 333.5  | 489.6  | 465.5  | MINPP1     | <a href="#">NM_004897.2</a> | MIPP;HIPER1;MINPP2;DKFZP564L2016      | phosphoinositide | endoplasmic reticulum polyphosphorylation |
| GI_19923769-S | 625.6  | 449.5  | 371.4  | HLX1       | <a href="#">NM_021958.2</a> | HB24                                  | DNA              | nucleus transcription                     |
| GI_19923778-S | 749.1  | 554.5  | 837.7  | PIR51      | <a href="#">NM_006479.2</a> |                                       | double-          | nucleus recombination                     |
| GI_19923779-S | 144.3  | 170.4  | 140.8  | SLCO1B1    | <a href="#">NM_006446.2</a> | LST-1;OATP2;OATP-C;OATP1B1;SLC21A6    | sodium-          | membrane organic                          |
| GI_19923781-S | 168.1  | 180    | 161.5  | LILRB1     | <a href="#">NM_006669.2</a> | CD85;ILT2;LIR1;MIR7;CD85J;LIR-1;MIR-7 | protein          | integral to response                      |
| GI_19923783-S | 1258.7 | 1640.3 | 1392.2 | PC4        | <a href="#">NM_006713.2</a> | P15                                   | single-          | transcription regulation                  |
| GI_19923785-S | 385.6  | 343.9  | 436.5  | UQCR       | <a href="#">NM_006830.2</a> |                                       | electron         | ubiquinol- energy                         |
| GI_19923786-S | 4056.5 | 4648.3 | 4141.9 | RER1       | <a href="#">NM_007033.2</a> |                                       | molecular        | Golgi retrograde                          |
| GI_19923789-S | 2341   | 1890.5 | 1690.7 | RAB3-GAP15 | <a href="#">NM_012414.2</a> | KIAA0839;DKFZP434D245                 | enzyme           | soluble intracellular                     |
| GI_19923793-S | 819.5  | 833    | 1087.6 | CARD10     | <a href="#">NM_014550.2</a> | BIMP1;CARMA3                          | protein          | kinesin apoptosis                         |
| GI_19923795-S | 601.2  | 773.3  | 543.3  | CGI-07     | <a href="#">NM_015938.2</a> | NMD3                                  | electron         | electron                                  |
| GI_19923799-S | 554.9  | 478.9  | 330.2  | MGC:13379  | <a href="#">NM_016499.2</a> |                                       |                  |                                           |

|               |        |        |        |            |                             |                         |           |             |            |
|---------------|--------|--------|--------|------------|-----------------------------|-------------------------|-----------|-------------|------------|
| GI_19923809-S | 428.3  | 568.1  | 495.4  | FLJ20254   | <a href="#">NM_017727.2</a> |                         | calcium   | extracellul |            |
| GI_19923815-S | 643.2  | 874.3  | 625.6  | PARVA      | <a href="#">NM_018222.2</a> | FLJ10793;FLJ12254       | actin     | cytoskelet  | cell       |
| GI_19923816-S | 582.6  | 780.6  | 721.2  | PECR       | <a href="#">NM_018441.2</a> | TERP;HSA250303          | apoptosis | peroxisom   | fatty acid |
| GI_19923820-S | 628.4  | 806.5  | 696.3  | DPYSL5     | <a href="#">NM_020134.2</a> | CRAM;CRMP5;Ulip6;CRMP-5 | hydrolase |             | axon       |
| GI_19923825-S | 1786   | 1534.7 | 1267.5 | LOC57149   | <a href="#">NM_020424.2</a> |                         |           |             |            |
| GI_19923826-S | 2228   | 2686.6 | 2813.4 | KIAA1191   | <a href="#">NM_020444.2</a> | FLJ21022                |           |             |            |
| GI_19923828-S | 887.7  | 660.8  | 705.3  | LOC57228   | <a href="#">NM_020467.2</a> |                         |           |             |            |
| GI_19923829-S | 351.9  | 757.7  | 678.1  | PBXIP1     | <a href="#">NM_020524.2</a> | HPIP                    |           |             |            |
| GI_19923835-S | 134.6  | 143.9  | 135.4  | CPEB1      | <a href="#">NM_030594.2</a> | CPEB;FLJ13203           | nucleic   |             |            |
| GI_19923839-S | 127.4  | 152.7  | 152.3  | FLJ13910   | <a href="#">NM_022780.2</a> | FLJ12753;FLJ21795       |           |             |            |
| GI_19923843-S | 88.4   | 97.6   | 100.3  | FLJ23518   | <a href="#">NM_024725.2</a> |                         |           |             |            |
| GI_19923847-S | 1567.1 | 861.8  | 989.6  | CDT1       | <a href="#">NM_030928.2</a> | DUP                     | DNA       | nucleus     | regulation |
| GI_19923852-S | 176.2  | 211.5  | 222.2  | DKFZP547NC | <a href="#">NM_032018.2</a> | dJ876B10.3              |           |             |            |
| GI_19923854-S | 877.7  | 1137.4 | 970.4  | SYAP1      | <a href="#">NM_032796.2</a> | PRO3113;FLJ14495        |           |             |            |
| GI_19923874-S | 122.7  | 118.9  | 115.4  | C21orf41   | <a href="#">NM_138332.1</a> |                         |           |             |            |
| GI_19923878-S | 926.4  | 984.8  | 1133.7 | SBBI54     | <a href="#">NM_138334.1</a> |                         |           | integral to |            |
| GI_19923880-S | 804.2  | 868.8  | 661.3  | GNPDA2     | <a href="#">NM_138335.1</a> | SB52                    | glucosami |             | N-         |
| GI_19923882-S | 104.6  | 105.7  | 103.2  | LOC150678  | <a href="#">NM_138336.1</a> |                         |           |             |            |
| GI_19923886-S | 138.1  | 138.1  | 129.2  | DKFZp761H2 | <a href="#">NM_138339.1</a> |                         |           |             |            |
| GI_19923898-S | 998.2  | 889.5  | 729.6  | LOC90799   | <a href="#">NM_138363.1</a> |                         |           |             |            |
| GI_19923900-S | 519.9  | 511.7  | 451.3  | MGC16044   | <a href="#">NM_138371.1</a> |                         |           |             |            |
| GI_19923904-S | 164.1  | 200.4  | 185.4  | LOC91937   | <a href="#">NM_138379.1</a> |                         |           |             |            |
| GI_19923906-S | 266.3  | 253.2  | 239    | MGC15763   | <a href="#">NM_138381.1</a> |                         | oxidoredu |             | electron   |
| GI_19923908-S | 743.6  | 713.5  | 672.1  | LOC92305   | <a href="#">NM_138385.1</a> |                         |           |             |            |
| GI_19923910-S | 181.4  | 175.2  | 173.1  | LOC92345   | <a href="#">NM_138386.1</a> |                         |           |             |            |
| GI_19923916-S | 515.2  | 518.1  | 635.6  | LOC92799   | <a href="#">NM_138392.1</a> |                         | voltage-  | membran     | potassium  |
| GI_19923918-S | 339.2  | 247.8  | 269.5  | DP1L1      | <a href="#">NM_138393.1</a> |                         |           |             |            |
| GI_19923924-S | 302.2  | 377.8  | 349.9  | LOC93082   | <a href="#">NM_138397.1</a> |                         | DNA       | nucleus     | regulation |
| GI_19923926-S | 993.3  | 1197.5 | 1198   | C6orf51    | <a href="#">NM_138408.1</a> | bA397G5.3               |           |             |            |
| GI_19923934-S | 393.1  | 355.9  | 369.9  | LOC112869  | <a href="#">NM_138414.1</a> |                         |           |             |            |
| GI_19923936-S | 161.2  | 110.1  | 91.5   | LOC112885  | <a href="#">NM_138415.1</a> |                         | DNA       | nucleus     | regulation |
| GI_19923938-S | 608.4  | 712    | 692.9  | LOC112970  | <a href="#">NM_138417.1</a> |                         |           |             |            |
| GI_19923942-S | 2011.7 | 2048   | 1976.7 | LOC113174  | <a href="#">NM_138421.1</a> |                         |           |             |            |
| GI_19923944-S | 348.3  | 310.8  | 366    | LOC113179  | <a href="#">NM_138422.1</a> |                         | zinc ion  |             |            |
| GI_19923948-S | 90.1   | 106.4  | 101.1  | KIF12      | <a href="#">NM_138424.1</a> |                         | ATP       | kinesin     | microtubul |
| GI_19923956-S | 2247.9 | 2653.6 | 2937.5 | LOC113655  | <a href="#">NM_138431.1</a> |                         |           |             |            |
| GI_19923960-S | 225.1  | 278.5  | 247.9  | C7orf29    | <a href="#">NM_138434.1</a> |                         |           |             |            |
| GI_19923962-S | 121.8  | 142.5  | 121.1  | LOC113828  | <a href="#">NM_138435.1</a> |                         |           |             |            |
| GI_19923976-S | 3083.2 | 3147.1 | 2889.6 | C7orf30    | <a href="#">NM_138446.1</a> |                         | molecular |             |            |
| GI_19923980-S | 114.6  | 149.7  | 115.9  | LOC115811  | <a href="#">NM_138451.1</a> |                         | DNA       | nucleus     | regulation |
| GI_19923982-S | 876.1  | 870.9  | 1188.5 | DHRS1      | <a href="#">NM_138452.1</a> | FLJ25430;MGC20204       | oxidoredu |             | metabolis  |
| GI_19923986-S | 97.6   | 93.4   | 101.7  | LOC115861  | <a href="#">NM_138454.1</a> |                         | electron  |             | electron   |
| GI_19923994-S | 416.7  | 341.1  | 321.4  | LOC116211  | <a href="#">NM_138461.1</a> |                         |           | integral to |            |
| GI_19924006-S | 133.7  | 144.1  | 148.8  | LOC144845  | <a href="#">NM_138474.1</a> |                         |           |             |            |

|               |        |        |        |           |                             |                                         |             |             |             |
|---------------|--------|--------|--------|-----------|-----------------------------|-----------------------------------------|-------------|-------------|-------------|
| GI_19924014-S | 148.4  | 154.8  | 139.7  | LOC151534 | <a href="#">NM_138482.1</a> |                                         |             |             |             |
| GI_19924022-S | 131.6  | 163.4  | 138.9  | LOC158435 | <a href="#">NM_138497.1</a> |                                         | receptor    |             |             |
| GI_19924096-A | 114.3  | 134    | 115.4  | SYN1      | <a href="#">NM_133499.1</a> | SYNI;SYN1a;SYN1b                        | actin       | secretory   | nonselecti  |
| GI_19924098-I | 171.5  | 192.9  | 183.3  | SYN1      | <a href="#">NM_006950.2</a> | SYNI;SYN1a;SYN1b                        | actin       | secretory   | nonselecti  |
| GI_19924100-I | 231.8  | 277.8  | 245.1  | SYN2      | <a href="#">NM_003178.2</a> | SYNII;SYNIIa;SYNIIb                     |             | peripheral  | synaptic    |
| GI_19924102-A | 211.9  | 235.1  | 213.2  | SYN2      | <a href="#">NM_133625.1</a> | SYNII;SYNIIa;SYNIIb                     |             | peripheral  | synaptic    |
| GI_19924102-I | 115.1  | 113.6  | 111.3  | SYN2      | <a href="#">NM_133625.1</a> | SYNII;SYNIIa;SYNIIb                     |             | peripheral  | synaptic    |
| GI_19924108-A | 138    | 184.1  | 160.7  | SYN3      | <a href="#">NM_133633.1</a> |                                         | ATP         | synaptic    | neurotran   |
| GI_19924110-S | 154.2  | 212.9  | 183.2  | PRODH     | <a href="#">NM_016335.2</a> | PIG6;HSPOX2;PRODH1;PRODH2;TP53I6        | proline     |             | proline     |
| GI_19924112-S | 158.9  | 183.3  | 164    | RAD9A     | <a href="#">NM_004584.2</a> | RAD9                                    |             | nucleus     | DNA         |
| GI_19924114-I | 4197.4 | 5312.2 | 4411.9 | RAD51L1   | <a href="#">NM_133509.1</a> | REC2;R51H2;hREC2;RAD51B                 | adenosine   | nucleus     | meiotic     |
| GI_19924116-A | 443.8  | 543    | 490.8  | RAD51L1   | <a href="#">NM_133510.1</a> | REC2;R51H2;hREC2;RAD51B                 | adenosine   | nucleus     | meiotic     |
| GI_19924116-I | 110.1  | 96.6   | 106.5  | RAD51L1   | <a href="#">NM_133510.1</a> | REC2;R51H2;hREC2;RAD51B                 | adenosine   | nucleus     | meiotic     |
| GI_19924124-A | 390.1  | 419.4  | 464.8  | RAD51L3   | <a href="#">NM_133629.1</a> | Trad;R51H3;HsTRAD;RAD51D                | DNA         | nucleus     | meiotic     |
| GI_19924128-I | 86.3   | 91.8   | 81.8   | RAD50     | <a href="#">NM_005732.2</a> | hRad50;RAD50-2                          | single-     | nucleus     | regulation  |
| GI_19924130-A | 153.7  | 126.9  | 87.7   | RAD50     | <a href="#">NM_133482.1</a> | hRad50;RAD50-2                          | single-     | nucleus     | regulation  |
| GI_19924132-I | 120.5  | 142.7  | 153.4  | RAD51     | <a href="#">NM_002875.2</a> | RECA;HRAD51;RAD51A;HsRad51;HsT1693      | adenosine   | nucleus     | mitotic     |
| GI_19924134-A | 101.3  | 104.9  | 99.6   | RAD51     | <a href="#">NM_133487.1</a> | RECA;HRAD51;RAD51A;HsRad51;HsT1693      | adenosine   | nucleus     | mitotic     |
| GI_19924136-S | 328    | 304.9  | 336.4  | RAD54L    | <a href="#">NM_003579.2</a> | HR54;hHR54;HRAD54;RAD54A                | adenosine   | nucleus     | meiosis     |
| GI_19924137-S | 2941.3 | 2327.7 | 2144.3 | RAD23A    | <a href="#">NM_005053.2</a> | HHR23A                                  | single-     | nucleus     | nucleotide- |
| GI_19924138-S | 1630.1 | 1800.1 | 1472.7 | RAD23B    | <a href="#">NM_002874.2</a> | P58;HR23B;HHR23B                        | single-     | nucleus     | nucleotide- |
| GI_19924139-I | 92.8   | 97.5   | 89.2   | LARGE     | <a href="#">NM_004737.2</a> | KIAA0609                                | acetylgluc  | kinesin     | N-          |
| GI_19924140-A | 321.5  | 197.2  | 381.1  | LARGE     | <a href="#">NM_133642.1</a> | KIAA0609                                | acetylgluc  | kinesin     | N-          |
| GI_19924142-S | 95.7   | 101.6  | 105.1  | LUZP1     | <a href="#">NM_033631.1</a> | LUZP;FLJ00226                           | binding     | mitochond   | transport   |
| GI_19924144-I | 127.7  | 134.4  | 126.6  | TCIRG1    | <a href="#">NM_006019.2</a> | a3;Stv1;Vph1;Atp6i;OC116;OPTB1;TIRC7;AT | transporte  | integral to | proton      |
| GI_19924146-A | 1606.9 | 1489.1 | 1091.9 | TCIRG1    | <a href="#">NM_006053.2</a> | a3;Stv1;Vph1;Atp6i;OC116;OPTB1;TIRC7;AT | transporte  | integral to | proton      |
| GI_19924146-I | 306.2  | 388.9  | 368.1  | TCIRG1    | <a href="#">NM_006053.2</a> | a3;Stv1;Vph1;Atp6i;OC116;OPTB1;TIRC7;AT | transporte  | integral to | proton      |
| GI_19924152-A | 163.4  | 182.5  | 179.9  | TLR4      | <a href="#">NM_138557.1</a> | TOLL;hToll                              | antibacteri | lipopolysa  | signal      |
| GI_19924154-I | 301.8  | 337.4  | 317.2  | RFXANK    | <a href="#">NM_003721.2</a> | BLS;RFX-B;ANKRA1;F14150_1               | transcripti | nucleus     | humoral     |
| GI_19924155-A | 502.3  | 530.3  | 571.6  | RFXANK    | <a href="#">NM_134440.1</a> | BLS;RFX-B;ANKRA1;F14150_1               | transcripti | nucleus     | humoral     |
| GI_19924157-S | 91.7   | 98.7   | 82.7   | RFXAP     | <a href="#">NM_000538.2</a> |                                         | DNA         | nucleus     | transcripti |
| GI_19924160-A | 4957   | 4178   | 3995.1 | C19orf2   | <a href="#">NM_134447.1</a> | RMP;URI;NNX3;FLJ10575                   | transcripti | DNA-        | pathogene   |
| GI_19924162-S | 94.1   | 90.6   | 94.9   | RNF28     | <a href="#">NM_032588.2</a> | IRF;SMRZ;MURF1;MURF2;FLJ32380           | zinc ion    | kinesin     | signal      |
| GI_19924164-S | 113.6  | 116.6  | 100.7  | ROS1      | <a href="#">NM_002944.2</a> | ROS;MCF3                                | protein-    | sodium/po   | oncogene    |
| GI_19924171-S | 501.8  | 366.7  | 409.9  | WRN       | <a href="#">NM_000553.2</a> | RECQ3;RECQL2;RECQL3                     | helicase    | nucleus     | aging       |
| GI_19924176-S | 2494.4 | 2630   | 2241.4 | SUPT16H   | <a href="#">NM_007192.2</a> | FACT;CDC68;FACTP140;FLJ10857;FLJ1401    | positive    |             | nucleoso    |
| GI_19924297-S | 95.6   | 98.3   | 102.1  | FIGF      | <a href="#">NM_004469.2</a> | VEGFD;VEGF-D                            | platelet-   | membran     | positive    |
| GI_19924298-S | 414.6  | 454.4  | 580.7  | FRAP1     | <a href="#">NM_004958.2</a> | FRAP;MTOR;FRAP2;RAFT1;RAP1              | inositol/ph | phosphoin   | DNA         |
| GI_19924299-S | 137.2  | 117.2  | 110.9  | TCAP      | <a href="#">NM_003673.2</a> | TELE;CMD1N;T-cap;LGMD2G;telethonin      | structural  | cytoplasm   | sarcomere   |
| GI_19924300-S | 1210.6 | 788.8  | 1053.5 | VEGFC     | <a href="#">NM_005429.2</a> | VRP;Flt4-L                              | growth      | membran     | lymph       |
| GI_19924303-S | 83     | 104.3  | 104.8  | HIST1H2BB | <a href="#">NM_021062.2</a> | H2B.1;H2B/f;H2BFF                       | DNA         | chromoso    | nucleoso    |
| GI_20069857-S | 281.1  | 352.5  | 283.8  | WFDC12    | <a href="#">NM_080869.1</a> | WAP2;C20orf122;dJ211D12.4               | serine      | extracellul | biological_ |
| GI_20070102-S | 611.3  | 2069.9 | 825.1  | TEAD2     | <a href="#">NM_003598.1</a> | ETF;TEF4;TEF-4                          | transcripti | nucleus     | regulation  |
| GI_20070108-I | 350.9  | 428.1  | 336.5  | DAB2IP    | <a href="#">NM_032552.1</a> | AF9Q34;DIP1/2;KIAA1743                  |             |             |             |



|               |         |        |                 |                             |                                     |             |             |             |
|---------------|---------|--------|-----------------|-----------------------------|-------------------------------------|-------------|-------------|-------------|
| GI_20070124-S | 7736.4  | 12294  | 9632 P4HB       | <a href="#">NM_000918.2</a> | DSI;GIT;PDI;PO4DB;PO4HB;PROHB;ERBA2 | protein     | endoplas    | electron    |
| GI_20070126-S | 70      | 100.9  | 86.7 PDE3A      | <a href="#">NM_000921.2</a> | CGI-PDE                             | cGMP-       | membran     | lipid       |
| GI_20070128-S | 151.3   | 157.6  | 157 PTAFR       | <a href="#">NM_000952.2</a> |                                     | platelet    | integral to | pathogene   |
| GI_20070134-S | 8469.6  | 8663.9 | 7984.7 G22P1    | <a href="#">NM_001469.2</a> | ML8;KU70;TLAA;D22S671;D22S731       | double-     | membran     | DNA         |
| GI_20070136-S | 599.6   | 511.6  | 548.8 NDUFA6    | <a href="#">NM_002490.2</a> | B14                                 | NADH        | NADH        |             |
| GI_20070140-S | 464.2   | 575.8  | 502.3 PLD2      | <a href="#">NM_002663.2</a> |                                     | phospholi   | plasma      | small       |
| GI_20070145-S | 186.4   | 238.4  | 136.9 SH3GL3    | <a href="#">NM_003027.2</a> | CNSA3;EEN-B2;SH3D2C;SH3P13;HsT19371 |             | kinesin     | central     |
| GI_20070149-S | 455.6   | 446.3  | 430.7 SPR       | <a href="#">NM_003124.2</a> |                                     | sepiapteri  |             | tetrahydro  |
| GI_20070157-S | 7565.6  | 7998.8 | 8078.2 STK24    | <a href="#">NM_003576.2</a> | MST3;STK3;MST-3;MST3B               | protein     |             | signal      |
| GI_20070169-S | 150.9   | 169.9  | 149.1 PLGL      | <a href="#">NM_002665.2</a> |                                     | plasmin     |             |             |
| GI_20070171-S | 1951.3  | 1880.9 | 1801.2 RPA1     | <a href="#">NM_002945.2</a> | HSSB;RF-A;RP-A;REPA1;RPA70          | single-     | DNA         | DNA         |
| GI_20070179-S | 5986.1  | 4934.1 | 4133.4 EIF4EBP1 | <a href="#">NM_004095.2</a> | 4EBP1;PHAS-I                        | translation |             | regulation  |
| GI_20070184-S | 379.6   | 411.9  | 406.2 USP14     | <a href="#">NM_005151.2</a> | TGT                                 | ubiquitin-  |             | deubiquiti  |
| GI_20070185-S | 286.4   | 299.4  | 234.8 PTER      | <a href="#">NM_030664.2</a> | RPR-1                               | zinc ion    |             | catabolis   |
| GI_20070198-S | 1549.9  | 1463   | 1462.3 NR2F6    | <a href="#">NM_005234.2</a> |                                     |             |             |             |
| GI_20070207-S | 4644.3  | 4719.7 | 3978 RHEB       | <a href="#">NM_005614.2</a> | RHEB2                               | GTPase      | membran     | signal      |
| GI_20070210-S | 14780.4 | 11291  | 8415.8 SUI1     | <a href="#">NM_005801.2</a> | A121;ISO1                           | translation | cytoplasm   | cell growth |
| GI_20070219-S | 1637.2  | 1429.2 | 1098.1 SKB1     | <a href="#">NM_006109.2</a> | JBP1;IBP72;PRMT5;SKB1Hs             |             |             | regulation  |
| GI_20070223-S | 872.4   | 728.3  | 734.1 ZNF297    | <a href="#">NM_005453.3</a> | BING1                               | DNA         | nucleus     | regulation  |
| GI_20070225-S | 91      | 103.4  | 91.1 AGR2       | <a href="#">NM_006408.2</a> | AG2;GOB-4;HAG-2;XAG-2               |             |             | oncogene    |
| GI_20070229-S | 104.9   | 176    | 127.6 ENPP2     | <a href="#">NM_006209.2</a> | ATX;PDNP2;LysoPLD;PD-IALPHA         | phosphodi   | integral to | phosphate   |
| GI_20070231-S | 277     | 307.9  | 284 UQCRB       | <a href="#">NM_006294.2</a> | QPC;QP-C;UQBC;UQBP;UQPC             | ubiquinol-  | mitochond   | oxidative   |
| GI_20070233-S | 549.1   | 692.1  | 598.7 TXNL4     | <a href="#">NM_006701.2</a> | DIM1;HsT161;U5-15kD                 |             |             |             |
| GI_20070234-S | 380.5   | 344.8  | 415 EVI2B       | <a href="#">NM_006495.2</a> | EVDB;D17S376                        |             | integral to | oncogene    |
| GI_20070240-S | 4835.5  | 4905.1 | 4237.6 D1S155E  | <a href="#">NM_007158.2</a> | UNR                                 | RNA         |             | male        |
| GI_20070258-S | 166.5   | 275.6  | 211.3 FEM1B     | <a href="#">NM_015322.2</a> | FIAA;KIAA0396                       | death       | cellular_co | induction   |
| GI_20070259-S | 1075.3  | 1050   | 1101.4 COBRA1   | <a href="#">NM_015456.2</a> | NELFB;NELF-B;DKFZP586B0519          |             | nucleus     | regulation  |
| GI_20070261-S | 153.3   | 171.1  | 163.2 TRAF3IP1  | <a href="#">NM_015650.2</a> | MIPT3;MIP-T3;DKFZp434F124           | receptor    |             |             |
| GI_20070263-S | 1514.2  | 2323.2 | 2332.4 XTP3TPB  | <a href="#">NM_015701.2</a> | CL24936;CL25084                     |             |             |             |
| GI_20070268-S | 122.5   | 128.2  | 102.4 PDCD1LG1  | <a href="#">NM_014143.2</a> | B7-H;B7H1;PDL1;PD-L1;PDCD1L1        |             |             | cell        |
| GI_20070269-S | 94.2    | 114.4  | 89 G0S2         | <a href="#">NM_015714.2</a> |                                     | molecular   | cellular_co | cell growth |
| GI_20070270-I | 88.5    | 109.2  | 103.4 TRNT1     | <a href="#">NM_016000.2</a> | CCA1;MtCCA;CGI-47                   | nucleotide  | mitochond   | tRNA        |
| GI_20070271-S | 3563.2  | 3619.4 | 3505.2 RDH11    | <a href="#">NM_016026.2</a> | MDT1;PSDR1;RALR1;SCALD;ARSDR1;CGI-  | oxidoredu   | endoplas    | metabolis   |
| GI_20070274-S | 229.4   | 247.7  | 226 KLF3        | <a href="#">NM_016531.2</a> | BKLF                                | transcripti | nucleus     | developm    |
| GI_20070275-S | 1830.4  | 1658.7 | 1636.4 GMPR2    | <a href="#">NM_016576.2</a> |                                     | GMP         |             | nucleotide  |
| GI_20070278-S | 757.3   | 1026.4 | 990.4 COMMD10   | <a href="#">NM_016144.2</a> | PTD002;FLJ11285                     |             |             |             |
| GI_20070283-S | 87      | 92.5   | 92 EMCN         | <a href="#">NM_016242.2</a> | EMCN2                               |             |             |             |
| GI_20070287-S | 616.8   | 605.5  | 553.5 FLJ10458  | <a href="#">NM_018096.2</a> | Nle                                 | signal      | heterotrim  | G-protein   |
| GI_20070288-S | 626.6   | 731.4  | 739.1 PLEKHA3   | <a href="#">NM_019091.2</a> | FAPP1;FLJ20067                      | phospholi   | cellular_co | biological_ |
| GI_20070290-S | 299.5   | 307.4  | 293.1 FLJ20013  | <a href="#">NM_017621.2</a> |                                     |             |             |             |
| GI_20070291-S | 248.9   | 349    | 409.1 CHST12    | <a href="#">NM_018641.2</a> | C4S-2;C4ST2;C4ST-2                  | transferas  |             |             |
| GI_20070295-S | 1068.1  | 917.8  | 1043.5 RNPEPL1  | <a href="#">NM_018226.2</a> | FLJ10806                            | aminopept   |             | proteolysis |
| GI_20070301-S | 151.2   | 231.5  | 136.8 DOK4      | <a href="#">NM_018110.2</a> | FLJ10488                            | insulin     |             |             |
| GI_20070304-S | 730.5   | 621.7  | 756.2 MDS031    | <a href="#">NM_018466.2</a> |                                     |             |             |             |

|               |        |        |        |           |                             |                                   |             |             |                          |
|---------------|--------|--------|--------|-----------|-----------------------------|-----------------------------------|-------------|-------------|--------------------------|
| GI_20070311-S | 122.3  | 117.4  | 104    | AMY2B     | <a href="#">NM_020978.2</a> | AMY2                              | alpha-      |             | carbohydr                |
| GI_20070320-S | 236.1  | 272.5  | 224.4  | NMNAT1    | <a href="#">NM_022787.2</a> | NMNAT;PNAT1;PNAT-1                | protein     | nucleus     | NADH                     |
| GI_20070322-I | 578.7  | 850.3  | 787.4  | SLC30A5   | <a href="#">NM_022902.2</a> | ZNT5;ZTL1;ZNTL1;ZnT-              |             |             |                          |
| GI_20070325-S | 1583.5 | 1616.4 | 1596   | FLJ13052  | <a href="#">NM_023018.2</a> | dJ283E3.1                         |             |             |                          |
| GI_20070327-I | 91.6   | 93.4   | 92.7   | MS4A4A    | <a href="#">NM_024021.2</a> | MS4A4;MS4A7;4SPAN1;CD20L1;CD20-   |             |             |                          |
| GI_20070329-S | 496.9  | 493.3  | 301.6  | ZFYVE21   | <a href="#">NM_024071.2</a> | MGC2550                           |             |             |                          |
| GI_20070332-S | 181.5  | 199.5  | 179.6  | NPEPL1    | <a href="#">NM_024663.2</a> | FLJ11583;bA261P9.2                |             | aminopept   | intracellula proteolysis |
| GI_20070334-S | 200.1  | 200.4  | 209.6  | FLJ11506  | <a href="#">NM_024666.2</a> |                                   |             |             |                          |
| GI_20070338-A | 177.7  | 359.5  | 220.6  | ZNF323    | <a href="#">NM_030899.2</a> | FLJ23407                          | transcripti | nucleus     | regulation               |
| GI_20070341-S | 367.2  | 368.1  | 399.7  | FLJ23375  | <a href="#">NM_024956.2</a> |                                   |             |             |                          |
| GI_20070345-S | 204.5  | 333.1  | 367.6  | ULBP2     | <a href="#">NM_025217.2</a> | RAET1H                            | MHC         | membran     | immune                   |
| GI_20070346-S | 89.9   | 105.7  | 86.8   | SLC2A11   | <a href="#">NM_030807.2</a> | GLUT10;GLUT11                     | glucose     | integral to | carbohydr                |
| GI_20070348-S | 358    | 350.6  | 246.3  | VMP1      | <a href="#">NM_030938.2</a> | DKFZP566I133                      |             |             |                          |
| GI_20070355-S | 2382.3 | 2336.4 | 2409.8 | NUMB      | <a href="#">NM_003744.3</a> | S171                              |             | integral to |                          |
| GI_20070357-S | 114.4  | 110.3  | 108.4  | LGR8      | <a href="#">NM_130806.2</a> | GREAT;GPR106                      | rhodopsin-  | integral to | G-protein                |
| GI_20070359-S | 133    | 207.4  | 127.3  | ARHV      | <a href="#">NM_133639.2</a> | Chp;WRCH2                         | Rho small   |             | small                    |
| GI_20070361-S | 86.6   | 82.6   | 83.1   | SDPR      | <a href="#">NM_004657.3</a> | SDR;PS-p68                        | phospholi   | caveola     |                          |
| GI_20070373-S | 112.4  | 127.2  | 113.9  | C6orf142  | <a href="#">NM_138569.1</a> | MGC18257                          |             |             |                          |
| GI_20070375-S | 191.5  | 207.7  | 182.3  | MGC15523  | <a href="#">NM_138570.1</a> |                                   |             |             |                          |
| GI_20070377-S | 151.6  | 164.4  | 151.6  | TBN       | <a href="#">NM_138572.1</a> | TAF8;FLJ32821                     |             |             |                          |
| GI_20070379-S | 92.8   | 102.4  | 87.3   | LOC145957 | <a href="#">NM_138573.1</a> |                                   | growth      | integral to |                          |
| GI_20070381-S | 206.5  | 242.4  | 205.2  | PWWP1     | <a href="#">NM_138574.1</a> | dJ309H15.1                        | DNA         | nucleus     | regulation               |
| GI_20070383-S | 142.5  | 169.7  | 165    | MGC5352   | <a href="#">NM_138575.1</a> |                                   | catalytic   |             | metabolis                |
| GI_20127147-S | 451.4  | 632.9  | 554.7  | ZNF451    | <a href="#">NM_015555.1</a> | COASTER;KIAA0576;dJ417I1.1        | DNA         | nucleus     | regulation               |
| GI_20127403-S | 150.8  | 171.6  | 144    | RCP       | <a href="#">NM_025151.2</a> | FLJ22524;FLJ22622;rab11-FIP1      |             |             |                          |
| GI_20127419-S | 449.9  | 404.2  | 382.8  | CHEK1     | <a href="#">NM_001274.2</a> | CHK1                              | tumor       | nucleus     | gametoge                 |
| GI_20127421-S | 161.7  | 176.1  | 167.2  | DSCAM     | <a href="#">NM_001389.2</a> | CHD2-42;CHD2-52                   | cell        | membran     | cell                     |
| GI_20127429-S | 3076.1 | 3375.8 | 3080.3 | PPP6C     | <a href="#">NM_002721.3</a> |                                   | protein     |             | G1/S                     |
| GI_20127439-S | 5850.4 | 6325.4 | 5398.3 | TETTRAN   | <a href="#">NM_001120.2</a> | TETTRAN                           | tetracyclin | integral to | small                    |
| GI_20127447-S | 850.4  | 818.9  | 1011.6 | POLA2     | <a href="#">NM_002689.2</a> |                                   | molecular   | nucleus     | DNA                      |
| GI_20127455-S | 1253.5 | 2674.4 | 3055.3 | GNG11     | <a href="#">NM_004126.2</a> |                                   | heterotrim  | peripheral  | signal                   |
| GI_20127456-S | 3829.2 | 3588.2 | 3637.8 | GYG       | <a href="#">NM_004130.2</a> |                                   | glycogenin  |             | glycogen                 |
| GI_20127458-S | 135    | 142.5  | 163.3  | CITED1    | <a href="#">NM_004143.2</a> | MSG1                              | transcripti | nucleus     | regulation               |
| GI_20127459-S | 1486.1 | 1244.5 | 1115.2 | XPC       | <a href="#">NM_004628.2</a> | XP3;XPCC                          | damaged     | nucleus     | nucleotide-              |
| GI_20127461-S | 87.5   | 105.3  | 91     | SLC16A5   | <a href="#">NM_004695.2</a> | MCT5                              | monocarb    | membran     | monocarb                 |
| GI_20127465-S | 225    | 243.4  | 248.6  | HOMER1    | <a href="#">NM_004272.2</a> | SYN47;Ves-1;HOMER-1B              | protein     | proteoglyc  | metabotro                |
| GI_20127466-S | 286.9  | 307.5  | 372.5  | CHST10    | <a href="#">NM_004854.2</a> | HNK1ST;HNK-1ST                    | sulfotransf | Golgi       | cell                     |
| GI_20127469-S | 1603   | 1322.3 | 1306.6 | EEF1E1    | <a href="#">NM_004280.2</a> | P18                               |             |             | protein                  |
| GI_20127471-S | 173.3  | 163.5  | 105.5  | ETS2      | <a href="#">NM_005239.2</a> |                                   | DNA         | nucleus     | skeletal                 |
| GI_20127480-S | 238.2  | 251.7  | 267.2  | EPM2A     | <a href="#">NM_005670.2</a> | LD;LDE;EPM2;MELF;LAFORIN          | protein     | polysome    | glycogen                 |
| GI_20127481-S | 243.8  | 278.5  | 261.2  | NKG7      | <a href="#">NM_005601.2</a> | GIG1                              |             | integral to |                          |
| GI_20127485-S | 2644.5 | 2979.9 | 3785.3 | M6PRBP1   | <a href="#">NM_005817.2</a> | PP17;TIP47                        |             | endosome    | vesicle-                 |
| GI_20127489-S | 688.5  | 577.3  | 489.9  | MADH2     | <a href="#">NM_005901.2</a> | JV18;MADR2;SMAD2;JV18-1           | protein     | nucleus     | signal                   |
| GI_20127493-S | 372.6  | 478.6  | 439.5  | ANP32A    | <a href="#">NM_006305.2</a> | LANP;MAPM;PP32;PHAP1;PHAPI;I1PP2A | MHC-        | nucleus     | intracellula             |

|               |        |        |        |           |                             |                                       |              |             |             |
|---------------|--------|--------|--------|-----------|-----------------------------|---------------------------------------|--------------|-------------|-------------|
| GI_20127494-S | 83     | 85.1   | 77.3   | POU4F1    | <a href="#">NM_006237.2</a> | BRN3A;RDC-1                           | transcripti  | nucleus     | synaptoge   |
| GI_20127496-S | 381.3  | 449.2  | 408.2  | PPP5C     | <a href="#">NM_006247.2</a> | PP5;PPP5                              | protein      | nucleus     | transcripti |
| GI_20127497-S | 1759.6 | 1654   | 1893.8 | RRAS      | <a href="#">NM_006270.2</a> |                                       | RAS small    |             | RAS         |
| GI_20127505-S | 378.1  | 378.6  | 409.4  | PMVK      | <a href="#">NM_006556.2</a> | PMK;PMKA;PMKASE;HUMPMKI               | phosphom     | peroxisom   | protein     |
| GI_20127508-S | 758    | 699.9  | 858.1  | RAB32     | <a href="#">NM_006834.2</a> |                                       | GTP          | mitochond   | protein     |
| GI_20127520-S | 435.2  | 534.7  | 518.3  | C22orf5   | <a href="#">NM_012264.2</a> | HS5O6A;DKFZP586A1024                  |              | integral to |             |
| GI_20127526-S | 920.4  | 664.1  | 323.7  | NXT1      | <a href="#">NM_013248.2</a> | P15;MTR2                              | protein      | nuclear     | nucleocyto  |
| GI_20127527-S | 583.9  | 644.2  | 542.4  | PARVB     | <a href="#">NM_013327.2</a> | CGI-56;BK414D7.C22.1.MRNA             |              |             |             |
| GI_20127535-S | 383.6  | 762.1  | 416.2  | RGL1      | <a href="#">NM_015149.2</a> | RGL;KIAA0959                          | Ral guanyl-  | cellular_co | small       |
| GI_20127543-S | 1213   | 1355.4 | 1017.1 | CGI-27    | <a href="#">NM_015955.2</a> |                                       |              |             |             |
| GI_20127554-S | 3790.2 | 3613.9 | 2652.6 | HSPC111   | <a href="#">NM_016391.2</a> | HSPC185                               |              | nucleus     |             |
| GI_20127557-S | 4906.9 | 5308.1 | 4504.3 | C9orf83   | <a href="#">NM_016410.2</a> | CGI-34;HSPC177                        | molecular    |             |             |
| GI_20127565-S | 744.7  | 652.2  | 593    | FLJ20457  | <a href="#">NM_017832.2</a> |                                       |              |             |             |
| GI_20127566-S | 143    | 135.6  | 121    | C1orf27   | <a href="#">NM_017847.2</a> | FLJ20505                              |              |             |             |
| GI_20127571-S | 161.9  | 139.9  | 170.9  | ZNF331    | <a href="#">NM_018555.3</a> | RITA;ZNF361;ZNF463                    | nucleic      | nucleus     | regulation  |
| GI_20127573-S | 863.5  | 694.4  | 317.1  | C14orf116 | <a href="#">NM_018589.2</a> | PRO1635                               |              |             |             |
| GI_20127576-S | 1838.5 | 1884.5 | 2031.4 | PNRC2     | <a href="#">NM_017761.2</a> | FLJ20312                              | receptor     |             |             |
| GI_20127579-S | 7933.2 | 6092.2 | 5341.9 | BTBD2     | <a href="#">NM_017797.2</a> | FLJ20386                              | protein      |             |             |
| GI_20127585-S | 706.5  | 570.8  | 525.6  | TDP1      | <a href="#">NM_018319.2</a> | SCAN1;FLJ11090                        | hydrolase    | nucleus     | DNA         |
| GI_20127593-S | 143.3  | 165.4  | 157.3  | C12orf6   | <a href="#">NM_020367.2</a> | HIN1L                                 |              |             |             |
| GI_20127594-S | 1266.2 | 2199.2 | 926.3  | PDLIM1    | <a href="#">NM_020992.2</a> | CLIM1;CLP36;ELFIN;CLP-36;hCLIM1       | protein      | cytoskelet  | response    |
| GI_20127595-S | 89     | 96.3   | 87.6   | CDT6      | <a href="#">NM_021146.2</a> | dJ647M16.1                            |              | soluble     | killer      |
| GI_20127596-S | 1643.6 | 3107.5 | 2361.8 | Hes4      | <a href="#">NM_021170.2</a> |                                       | DNA          | nucleus     | regulation  |
| GI_20127599-S | 305.1  | 170.5  | 162.9  | RRAGD     | <a href="#">NM_021244.2</a> | RAGD;bA11D8.2.1;DKFZP761H171          | small        | cytoplasm   | cell growth |
| GI_20127606-S | 926.9  | 1211.9 | 1021.3 | C14orf133 | <a href="#">NM_022067.2</a> | FLJ12707                              |              |             |             |
| GI_20127610-S | 584.8  | 643    | 777.3  | FLJ22405  | <a href="#">NM_022485.2</a> | FLJ90311                              | protein      |             | protein     |
| GI_20127615-S | 1618.6 | 1957.2 | 1410.3 | NICAL     | <a href="#">NM_022765.2</a> | MICAL;MICAL-                          |              |             |             |
| GI_20127622-S | 946    | 1108.7 | 799.9  | MEP50     | <a href="#">NM_024102.2</a> | MGC2722                               |              |             |             |
| GI_20127623-S | 100.2  | 117.2  | 106.8  | NOX5      | <a href="#">NM_024505.2</a> | NOX5A;NOX5B                           | binding      | membran     | transport   |
| GI_20127625-S | 74.5   | 120.1  | 103.3  | C14orf139 | <a href="#">NM_024633.2</a> | FLJ21276                              |              |             |             |
| GI_20127628-S | 1432.6 | 1029.4 | 993.3  | FLJ23436  | <a href="#">NM_024671.2</a> |                                       | DNA-         | DNA-        | transcripti |
| GI_20127633-S | 196.2  | 188.5  | 160.1  | FLJ12598  | <a href="#">NM_024754.2</a> |                                       |              |             |             |
| GI_20127635-S | 101.2  | 133    | 103    | CHODL     | <a href="#">NM_024944.2</a> | MT75;PRED12;C21orf68;FLJ12627         | lectin [goid | integral to | heterophili |
| GI_20127637-S | 95.4   | 124.8  | 106.5  | GPR157    | <a href="#">NM_024980.2</a> | FLJ12132                              | G-protein    | membran     |             |
| GI_20127641-S | 188    | 144    | 195    | GKAP42    | <a href="#">NM_025211.2</a> | FKSG21                                |              |             |             |
| GI_20127646-S | 84.9   | 91     | 78.3   | ITIH5     | <a href="#">NM_030569.2</a> | MGC10848                              |              |             |             |
| GI_20127649-S | 951.2  | 883.4  | 729.5  | KIAA0157  | <a href="#">NM_032182.2</a> |                                       |              |             |             |
| GI_20127651-S | 3521.3 | 3252.3 | 2694.7 | PSARL     | <a href="#">NM_018622.3</a> | PARL;PSARL1;PRO2207;PSENIP2           |              |             |             |
| GI_20127653-S | 97.6   | 106.7  | 105.2  | MGC15631  | <a href="#">NM_032753.2</a> |                                       | transcripti  | nucleus     | regulation  |
| GI_20127658-S | 1128.5 | 1189.1 | 1049.9 | LGALS12   | <a href="#">NM_033101.2</a> | GRIP1;GALECTIN-12                     |              |             |             |
| GI_20127661-S | 614    | 1228.4 | 1437.4 | TP53INP1  | <a href="#">NM_033285.2</a> | SIP;Teap;FLJ22139;P53DINP1;TP53DINP1; |              |             |             |
| GI_20127665-S | 105.2  | 122.4  | 109    | MGC4766   | <a href="#">NM_031451.3</a> | NYD-SP8                               |              |             |             |
| GI_20143481-S | 128.9  | 135    | 138.2  | KIAA1587  | <a href="#">NM_020932.1</a> | HCA1;DAMAGE                           |              |             |             |
| GI_20143483-S | 89.2   | 108.5  | 94.1   | OSAP      | <a href="#">NM_032623.2</a> |                                       |              |             |             |

|               |         |        |        |          |                             |                                     |             |             |              |
|---------------|---------|--------|--------|----------|-----------------------------|-------------------------------------|-------------|-------------|--------------|
| GI_20143909-I | 138.7   | 203.8  | 144.9  | WSB1     | <a href="#">NM_134264.1</a> | SWIP1;WSB-1                         | molecular   | cellular_co | intracellula |
| GI_20143911-A | 395.5   | 473.2  | 340.3  | WSB1     | <a href="#">NM_134265.1</a> | SWIP1;WSB-1                         | molecular   | cellular_co | intracellula |
| GI_20143915-A | 87.8    | 91.2   | 82.6   | TTN      | <a href="#">NM_133379.1</a> | TMD;CMD1G;CMPD4;FLJ32040            | structural  | cytoskelet  | regulation   |
| GI_20143915-I | 96.4    | 92.2   | 89     | TTN      | <a href="#">NM_133379.1</a> | TMD;CMD1G;CMPD4;FLJ32040            | structural  | cytoskelet  | regulation   |
| GI_20143917-I | 117.8   | 106.3  | 105.6  | TTN      | <a href="#">NM_133432.1</a> | TMD;CMD1G;CMPD4;FLJ32040            | structural  | cytoskelet  | regulation   |
| GI_20143921-I | 145.1   | 169.2  | 150.2  | TTN      | <a href="#">NM_133437.1</a> | TMD;CMD1G;CMPD4;FLJ32040            | structural  | cytoskelet  | regulation   |
| GI_20143928-I | 89.2    | 84.9   | 88.1   | RAD54B   | <a href="#">NM_012415.2</a> |                                     | DNA         |             | mitotic      |
| GI_20143929-A | 175.5   | 185.3  | 203.5  | RAD54B   | <a href="#">NM_134434.1</a> |                                     | DNA         |             | mitotic      |
| GI_20143931-S | 90.3    | 108.6  | 104    | RLN1     | <a href="#">NM_006911.2</a> | RLXH1;bA12D24.3.1;bA12D24.3.2       | peptide     | extracellul | pregnancy    |
| GI_20143932-A | 95.5    | 108.5  | 90.5   | RLN2     | <a href="#">NM_134441.1</a> | RLXH2;bA12D24.1.1;bA12D24.1.2       | hormone     | extracellul | pregnancy    |
| GI_20143934-I | 94.3    | 92.8   | 85.3   | RLN2     | <a href="#">NM_005059.2</a> | RLXH2;bA12D24.1.1;bA12D24.1.2       | hormone     | extracellul | pregnancy    |
| GI_20143940-A | 143.8   | 198.5  | 144.6  | MUC4     | <a href="#">NM_138297.1</a> | HSA276359                           | Neu/ErbB-   | integral to |              |
| GI_20143942-I | 135.9   | 132.6  | 121.1  | KCNK10   | <a href="#">NM_021161.3</a> | TREK2;TREK-2                        | potassium   | membran     | small        |
| GI_20143943-I | 126.5   | 133.5  | 118.9  | KCNK10   | <a href="#">NM_138317.1</a> | TREK2;TREK-2                        | potassium   | membran     | small        |
| GI_20143945-A | 108.7   | 118.9  | 107.9  | KCNK10   | <a href="#">NM_138318.1</a> | TREK2;TREK-2                        | potassium   | membran     | small        |
| GI_20143945-I | 99.5    | 119    | 100    | KCNK10   | <a href="#">NM_138318.1</a> | TREK2;TREK-2                        | potassium   | membran     | small        |
| GI_20143947-S | 276.9   | 283.4  | 273.9  | TOP3A    | <a href="#">NM_004618.2</a> | TOP3                                | DNA         | nucleus     | meiosis      |
| GI_20143948-S | 679.2   | 583.7  | 594.7  | TOPBP1   | <a href="#">NM_007027.2</a> | KIAA0259                            | protein C-  | nucleus     | DNA          |
| GI_20143949-A | 430.6   | 523.1  | 496.8  | ITGB1BP1 | <a href="#">NM_022334.2</a> | ICAP1;ICAP1A;ICAP1B;ICAP-1A;ICAP-1B | protein C-  | peripheral  | protein      |
| GI_20143950-I | 1791    | 1497.6 | 1261   | ITGB1BP1 | <a href="#">NM_004763.2</a> | ICAP1;ICAP1A;ICAP1B;ICAP-1A;ICAP-1B | protein C-  | peripheral  | protein      |
| GI_20143951-A | 159.2   | 193.4  | 143.1  | RAD52    | <a href="#">NM_002879.2</a> |                                     | DNA         | nucleus     | mitotic      |
| GI_20143953-I | 154.4   | 169    | 163    | RAD52    | <a href="#">NM_134422.1</a> |                                     | DNA         | nucleus     | mitotic      |
| GI_20143955-I | 95.4    | 111.6  | 101.9  | RAD52    | <a href="#">NM_134423.1</a> |                                     | DNA         | nucleus     | mitotic      |
| GI_20143959-A | 160.4   | 179.8  | 153.3  | DLX4     | <a href="#">NM_001934.2</a> | BP1;DLX7;DLX8;DLX9                  | transcripti |             |              |
| GI_20143961-I | 259     | 324    | 297.1  | DLX4     | <a href="#">NM_138281.1</a> | BP1;DLX7;DLX8;DLX9                  | transcripti |             |              |
| GI_20143963-S | 95.6    | 88.7   | 86.3   | GRIN3A   | <a href="#">NM_133445.1</a> | NR3A;NMDAR-L                        |             |             |              |
| GI_20143965-A | 628     | 658.6  | 873.3  | KIF23    | <a href="#">NM_004856.4</a> | CHO1;KNSL5;MKLP1;MKLP-1             | microtubul  | kinesin     | mitotic      |
| GI_20143966-I | 177.9   | 175.1  | 179.8  | KIF23    | <a href="#">NM_138555.1</a> | CHO1;KNSL5;MKLP1;MKLP-1             | microtubul  | kinesin     | mitotic      |
| GI_20143970-S | 110.8   | 124.7  | 125.5  | TLR6     | <a href="#">NM_006068.2</a> |                                     | defense/i   | phagocytic  | signal       |
| GI_20143972-S | 1002.6  | 2069.2 | 279.2  | HHIP     | <a href="#">NM_022475.1</a> | HIP;FLJ20992                        |             |             |              |
| GI_20143974-S | 333.3   | 416.9  | 373    | ABCG4    | <a href="#">NM_022169.2</a> | WHITE2                              | nucleotide  | integral to | transport    |
| GI_20143978-S | 188.8   | 223.2  | 236.7  | ATR      | <a href="#">NM_001184.2</a> | FRP1;SCKL;SCKL1                     | protein     |             | recombina    |
| GI_20143980-S | 387.5   | 399.6  | 460.8  | HSD17B8  | <a href="#">NM_014234.3</a> | KE6;FABG;HKE6;FABGL;RING2;H2-       | alcohol     | cellular_co | lipid        |
| GI_20149303-S | 938.7   | 1190.9 | 1089.9 | KIAA1160 | <a href="#">NM_020701.1</a> |                                     |             |             |              |
| GI_20149305-S | 19074.2 | 22059  | 20448  | UBC      | <a href="#">NM_021009.1</a> |                                     |             |             |              |
| GI_20149319-A | 130.2   | 133    | 140.3  | CLDN15   | <a href="#">NM_138429.1</a> | MGC19536                            |             |             |              |
| GI_20149319-I | 302.4   | 357    | 326    | CLDN15   | <a href="#">NM_138429.1</a> | MGC19536                            |             |             |              |
| GI_20149497-S | 18198.9 | 18416  | 14709  | FTL      | <a href="#">NM_000146.2</a> | PRO2760                             | iron ion    | ferritin    | iron ion     |
| GI_20149499-S | 473.3   | 501    | 597.4  | HMBS     | <a href="#">NM_000190.2</a> | AIP;UPS;PBGD                        | hydroxym    |             | heme         |
| GI_20149501-S | 146.9   | 171.9  | 135.5  | PLA2G2A  | <a href="#">NM_000300.2</a> | MOM1;PLA2B;PLA2L;PLA2S;PLAS1        | calcium-    | membran     | oncogene     |
| GI_20149508-S | 433.5   | 499.4  | 602.9  | BUB1B    | <a href="#">NM_001211.3</a> | BUBR1;Bub1A;MAD3L                   | protein     | kinetochor  | mitotic      |
| GI_20149512-S | 1006.6  | 970.7  | 369.3  | CHC1     | <a href="#">NM_001269.2</a> | RCC1                                | Ran         | nucleus     | chromoso     |
| GI_20149514-S | 664.3   | 905.9  | 1629.2 | CXADR    | <a href="#">NM_001338.2</a> | CAR;HCAR                            | receptor    | integral to |              |
| GI_20149519-S | 2678.3  | 2139.4 | 1967.5 | PAFAH1B3 | <a href="#">NM_002573.2</a> |                                     | 1-alkyl-2-  | soluble     | lipid        |

|               |        |        |        |            |                             |                                     |             |             |             |
|---------------|--------|--------|--------|------------|-----------------------------|-------------------------------------|-------------|-------------|-------------|
| GI_20149523-S | 1186.7 | 1168   | 1193   | SUPT5H     | <a href="#">NM_003169.2</a> | SPT5;SPT5H                          | transcripti | nucleus     | chromatin   |
| GI_20149527-S | 132.7  | 161.7  | 119.8  | PSTPIP1    | <a href="#">NM_003978.2</a> | H-                                  |             | peripheral  | response    |
| GI_20149546-S | 154.7  | 171.4  | 146.7  | RPS6KA1    | <a href="#">NM_002953.2</a> | RSK;HU-1;RSK1;MAPKAPK1A             | protein     |             | signal      |
| GI_20149548-S | 2069.8 | 2802.1 | 2650.6 | SRP54      | <a href="#">NM_003136.2</a> |                                     | RNA         | signal      | protein     |
| GI_20149554-S | 158.6  | 886.3  | 878    | SERPINB1   | <a href="#">NM_030666.2</a> | EI;LEI;PI2;MNEI;M/NEI;ELANH2        | serpin      | cytoplasm   |             |
| GI_20149561-S | 1431.9 | 1119.9 | 1244.3 | TRIP13     | <a href="#">NM_004237.2</a> | 16E1BP                              | transcripti | nucleus     | transcripti |
| GI_20149567-S | 6539.7 | 6121   | 5162.9 | NDUFV1     | <a href="#">NM_007103.2</a> | UQOR1                               | NADH        | mitochond   | energy      |
| GI_20149569-I | 115.5  | 129.3  | 116.1  | RASGRP2    | <a href="#">NM_005825.2</a> | CDC25L;CALDAG-GEFI                  | lipid       |             | signal      |
| GI_20149573-S | 189.4  | 232.8  | 199.5  | KLK2       | <a href="#">NM_005551.2</a> |                                     | tissue      |             | proteolysis |
| GI_20149575-S | 2099.4 | 2577.4 | 1959.7 | NFE2L2     | <a href="#">NM_006164.2</a> | NRF2                                | transcripti | nucleus     | transcripti |
| GI_20149579-S | 1036.2 | 962.6  | 855    | SLC35A1    | <a href="#">NM_006416.2</a> | CST;hCST;CMPST                      | CMP-sialic  | Golgi       | CMP-sialic  |
| GI_20149581-S | 102.7  | 102.3  | 106.5  | MARCO      | <a href="#">NM_006770.2</a> | SCARA2                              | macropha    | integral to | response    |
| GI_20149585-S | 130.5  | 149.9  | 128.6  | SAA2       | <a href="#">NM_030754.2</a> |                                     | acute-      | extracellul | acute-      |
| GI_20149591-S | 4903.2 | 5315.6 | 4380.2 | UNRIP      | <a href="#">NM_007178.2</a> | MAWD;PT-WD                          |             |             | invasive    |
| GI_20149593-S | 5352   | 7533.7 | 5790.4 | HSPCB      | <a href="#">NM_007355.2</a> | HSPC2;D6S182;HSP90B;HSP90-BETA      | ATP         | cytoplasm   | protein     |
| GI_20149595-S | 97.7   | 99     | 91.4   | CBLC       | <a href="#">NM_012116.2</a> | CBL-3;RNF57;CBL-SL                  | protein     | nucleus     | negative    |
| GI_20149599-S | 1692.2 | 2215.2 | 2319   | MSRB       | <a href="#">NM_012228.2</a> | CBS1;PILB;CBS-1;CGI-131             | transcripti |             |             |
| GI_20149601-S | 2512   | 2588   | 2288.5 | NT5C2      | <a href="#">NM_012229.2</a> | GMP;NT5B;PNT5;cN-II                 | 5'-         | cytosol     |             |
| GI_20149602-S | 855.3  | 451.2  | 497.6  | HEY1       | <a href="#">NM_012258.2</a> | CHF2;CHF-2;HERP2;HESR1;HRT-1;HESR-1 | DNA         | nucleus     | histogene   |
| GI_20149604-S | 246    | 393.5  | 230.7  | TTL1       | <a href="#">NM_012263.2</a> | C22ORF7;KIAA0173;HS323M22B          | molecular   | cellular_co | protein     |
| GI_20149611-S | 94.6   | 97.8   | 99.5   | ERVWE1     | <a href="#">NM_014590.2</a> | HERVW;HERV-W;HERV-W-ENV             | structural  | viral       | syncytium   |
| GI_20149616-S | 600.9  | 321.1  | 387.4  | NPDC1      | <a href="#">NM_015392.2</a> | CAB;CAB-;CAB1;CAB-1;DKFZP586J0523   |             | integral to |             |
| GI_20149620-S | 263.3  | 304.6  | 303.5  | DKFZP586B1 | <a href="#">NM_015533.2</a> |                                     | glycerone   |             | glycerol    |
| GI_20149630-S | 105.5  | 116    | 111.5  | DUSP13     | <a href="#">NM_016364.2</a> | BEDP;TMDP;FLJ32450                  | protein     |             | meiosis     |
| GI_20149632-S | 589.6  | 543    | 466.3  | SITPEC     | <a href="#">NM_016581.2</a> |                                     |             |             |             |
| GI_20149636-S | 199.9  | 223.8  | 196    | ARTS-1     | <a href="#">NM_016442.2</a> | ALAP;A-                             | aminopept   |             | proteolysis |
| GI_20149638-S | 235.1  | 131.3  | 119.7  | NOX4       | <a href="#">NM_016931.2</a> | KOX;KOX-1;RENOX                     | nucleotide  | membran     | energy      |
| GI_20149642-S | 1970.4 | 1530.5 | 981    | FLJ20729   | <a href="#">NM_017953.2</a> | FLJ20760                            |             |             |             |
| GI_20149644-S | 2411.1 | 2236.8 | 2514.8 | SARS2      | <a href="#">NM_017827.2</a> | SYS;SARS;SERS;SARSM;SerRSmt;mtSerR  | serine-     | mitochond   | seryl-      |
| GI_20149649-S | 378.5  | 594.7  | 572.4  | CHST11     | <a href="#">NM_018413.2</a> | C4ST;C4ST1;C4ST-1;HSA269537         | transferas  |             |             |
| GI_20149650-S | 1047.9 | 887    | 828.8  | FLJ10233   | <a href="#">NM_018034.2</a> |                                     |             |             |             |
| GI_20149671-S | 3664.2 | 3620.8 | 3306.3 | FLJ13855   | <a href="#">NM_023079.2</a> | HOYS7                               | ubiquitin   |             | ubiquitin   |
| GI_20149672-A | 1844.7 | 1321.3 | 1376.6 | SLC30A5    | <a href="#">NM_024055.2</a> | ZNT5;ZTL1;ZNTL1;ZnT-                |             |             |             |
| GI_20149672-I | 182.5  | 180.9  | 159.4  | SLC30A5    | <a href="#">NM_024055.2</a> | ZNT5;ZTL1;ZNTL1;ZnT-                |             |             |             |
| GI_20149678-S | 311.5  | 381.6  | 363.5  | FLJ22160   | <a href="#">NM_024585.2</a> |                                     |             |             |             |
| GI_20149679-S | 667.2  | 619.4  | 764.2  | FN3KRP     | <a href="#">NM_024619.2</a> | FLJ12171                            | kinase      |             |             |
| GI_20149694-S | 769.5  | 572.7  | 611.8  | FLJ22246   | <a href="#">NM_025232.2</a> | PP432;FLJ22277                      |             |             |             |
| GI_20149699-S | 168.6  | 180.8  | 174.7  | MYCBPAP    | <a href="#">NM_032133.2</a> | AMAP-1;DKFZp434N1415                |             |             |             |
| GI_20149708-S | 194.1  | 282    | 241.6  | LOC92906   | <a href="#">NM_138394.2</a> |                                     |             |             |             |
| GI_20149710-S | 1708.9 | 1372.5 | 1018.2 | LOC93349   | <a href="#">NM_138402.2</a> |                                     |             |             |             |
| GI_20149715-S | 100    | 104.3  | 101.6  | KIAA0626   | <a href="#">NM_021647.3</a> |                                     |             |             |             |
| GI_20162553-S | 120.3  | 130    | 137.4  | KLF14      | <a href="#">NM_138693.1</a> | BTEB5                               | DNA         | nucleus     | regulation  |
| GI_20162565-S | 2418.6 | 2233.2 | 1319.4 | C7orf11    | <a href="#">NM_138701.1</a> | ORF20                               | DNA         | nucleus     | regulation  |
| GI_20162567-I | 84.7   | 95.4   | 93.2   | MAGEC3     | <a href="#">NM_138702.1</a> | HCA2;MAGE-C3                        |             |             |             |

|               |        |        |        |             |                             |                                     |              |              |             |
|---------------|--------|--------|--------|-------------|-----------------------------|-------------------------------------|--------------|--------------|-------------|
| GI_20162573-S | 113.2  | 101.9  | 91.6   | LOC163688   | <a href="#">NM_138705.1</a> |                                     | calcium      |              |             |
| GI_20162575-S | 197.3  | 247.4  | 217.1  | IMAGE:4907C | <a href="#">NM_138706.1</a> | B3Gn-T6                             | galactosylt  | membran      | protein     |
| GI_20270187-S | 172.4  | 232.1  | 197.3  | ETV3        | <a href="#">NM_005240.1</a> | PE1;METS;PE-1;bA110J1.4             | DNA          | nucleus      | regulation  |
| GI_20270211-S | 915    | 1130.3 | 954.1  | TNKS1BP1    | <a href="#">NM_033396.1</a> | TAB182;KIAA1741                     | enzyme       | chromoso     | telomeras   |
| GI_20270264-A | 103    | 95.5   | 100.2  | SPAP1       | <a href="#">NM_138739.1</a> | FCRH2;IFGP4;IRTA4;SPAP1A;SPAP1B;SPA |              |              |             |
| GI_20270264-I | 125.8  | 135.2  | 103.6  | SPAP1       | <a href="#">NM_138739.1</a> | FCRH2;IFGP4;IRTA4;SPAP1A;SPAP1B;SPA |              |              |             |
| GI_20270302-S | 5785.7 | 6154.9 | 5675.4 | ARHT2       | <a href="#">NM_138769.1</a> | MIRO-2;C16orf39                     |              |              |             |
| GI_20270304-S | 161.5  | 191.3  | 163.4  | SYTL5       | <a href="#">NM_138780.1</a> | slp5                                | electron     |              | electron    |
| GI_20270306-S | 125.8  | 148.1  | 157.9  | LOC90557    | <a href="#">NM_138770.1</a> |                                     |              |              |             |
| GI_20270310-S | 1048.7 | 1159.7 | 1289.5 | LOC91137    | <a href="#">NM_138773.1</a> |                                     | binding      | mitochond    | transport   |
| GI_20270314-S | 112.2  | 113    | 98.9   | LOC91801    | <a href="#">NM_138775.1</a> |                                     | structural   | ribosome     | protein     |
| GI_20270320-S | 682.4  | 571.6  | 471.4  | LOC113386   | <a href="#">NM_138781.1</a> |                                     |              |              |             |
| GI_20270322-S | 512.1  | 571.8  | 549.3  | LOC115950   | <a href="#">NM_138783.1</a> |                                     | DNA          | nucleus      | regulation  |
| GI_20270324-S | 114.8  | 121.2  | 107    | LOC116123   | <a href="#">NM_138784.1</a> |                                     | monooxyg     |              | electron    |
| GI_20270326-S | 187.8  | 212.3  | 192.9  | LOC116441   | <a href="#">NM_138786.1</a> |                                     |              | integral to  |             |
| GI_20270334-S | 140.9  | 169    | 140.9  | LOC122618   | <a href="#">NM_138790.1</a> |                                     | catalytic    |              | metabolis   |
| GI_20270340-S | 2107.1 | 1787.1 | 1480.4 | LYPLAL1     | <a href="#">NM_138794.1</a> | Q96AV0                              | catalytic    |              |             |
| GI_20270346-S | 360.3  | 445.3  | 530.1  | LOC129138   | <a href="#">NM_138797.1</a> |                                     |              |              |             |
| GI_20270348-S | 655.2  | 551.6  | 513.2  | LOC129531   | <a href="#">NM_138798.1</a> |                                     |              |              |             |
| GI_20270352-S | 129.4  | 156.8  | 126.9  | TRIM43      | <a href="#">NM_138800.1</a> |                                     | zinc ion     | intracellula |             |
| GI_20270354-S | 120.8  | 133    | 123.7  | GALM        | <a href="#">NM_138801.1</a> |                                     |              |              |             |
| GI_20270356-S | 430.5  | 382.9  | 423.7  | LOC130617   | <a href="#">NM_138802.1</a> |                                     | molecular    |              |             |
| GI_20270368-S | 249.6  | 297.9  | 260    | LOC132200   | <a href="#">NM_138808.1</a> |                                     |              |              |             |
| GI_20270376-S | 85.1   | 80.8   | 80     | LOC143241   | <a href="#">NM_138812.1</a> |                                     |              |              |             |
| GI_20270382-S | 130.9  | 156.1  | 145.9  | SLC7A13     | <a href="#">NM_138817.1</a> | AGT1;XAT2;AGT-1                     | amino        | membran      | amino       |
| GI_20270386-S | 101    | 116.3  | 109.3  | LOC159091   | <a href="#">NM_138819.1</a> |                                     |              |              |             |
| GI_20270388-S | 1516.6 | 1536.5 | 1626.4 | MGC2198     | <a href="#">NM_138820.1</a> |                                     |              |              |             |
| GI_20302037-S | 970    | 1103.3 | 991.5  | C6orf72     | <a href="#">NM_138785.1</a> | dJ12G14.2                           |              |              |             |
| GI_20302039-S | 153.2  | 163    | 140.2  | LOC122945   | <a href="#">NM_138791.1</a> |                                     | pyrroline-5- |              | proline     |
| GI_20302136-S | 86.2   | 112.8  | 93.6   | KIAA0125    | <a href="#">NM_014792.2</a> |                                     |              |              |             |
| GI_20302137-S | 148.3  | 184.3  | 176.5  | CST6        | <a href="#">NM_001323.2</a> |                                     | cysteine     |              | embryoge    |
| GI_20302138-S | 419.9  | 553.3  | 269    | CST7        | <a href="#">NM_003650.2</a> | CMAP                                | cysteine     |              | immune      |
| GI_20302146-A | 192.3  | 242.1  | 204.9  | KLK15       | <a href="#">NM_138564.1</a> | ACO;HSRNASPH                        | serine-      | extracellul  | proteolysis |
| GI_20302148-S | 693.9  | 914.4  | 781    | LYPLA1      | <a href="#">NM_006330.2</a> | LPL1;APT-1;LYSOPLA                  | lysophosp    | membran      |             |
| GI_20302149-S | 1368.1 | 1525.7 | 1809.3 | LYPLA2      | <a href="#">NM_007260.2</a> | APT-2;DJ886K2.4                     | catalytic    |              |             |
| GI_20302150-S | 529.4  | 559.6  | 646    | LYPLA3      | <a href="#">NM_012320.2</a> | ACS;LLPL;DKFZp564A0122              | lysophosp    |              | fatty acid  |
| GI_20302151-S | 112.1  | 116.4  | 110.2  | HABP2       | <a href="#">NM_004132.2</a> | FSAP;HABP;PHBP;HGFAL                | glycosami    | extracellul  | cell        |
| GI_20302152-I | 153.7  | 178.5  | 182.8  | HAS3        | <a href="#">NM_005329.2</a> |                                     |              | integral to  | carbohydr   |
| GI_20302154-A | 103.2  | 93.4   | 86.6   | HAS3        | <a href="#">NM_138612.1</a> |                                     |              | integral to  | carbohydr   |
| GI_20302154-I | 150.1  | 161.2  | 152.3  | HAS3        | <a href="#">NM_138612.1</a> |                                     |              | integral to  | carbohydr   |
| GI_20302156-I | 103.2  | 112.9  | 90.8   | MSMB        | <a href="#">NM_002443.2</a> | MSP;PSP;IGBF;MSPB;PN44;PRPS;PSP57;P | molecular    | extracellul  | biological_ |
| GI_20302157-A | 99.8   | 122.9  | 111.2  | MSMB        | <a href="#">NM_138634.1</a> | MSP;PSP;IGBF;MSPB;PN44;PRPS;PSP57;P | molecular    | extracellul  | biological_ |
| GI_20302159-S | 731.6  | 888.6  | 814.2  | TSNAX       | <a href="#">NM_005999.2</a> | TRAX                                | protein      | nucleus      |             |
| GI_20302160-S | 90.3   | 102.8  | 96.3   | TSN         | <a href="#">NM_004622.2</a> | TRSLN;BCLF-1;REHF-1                 | DNA          | nucleus      | DNA         |

|               |        |        |        |           |                             |                                       |             |             |             |
|---------------|--------|--------|--------|-----------|-----------------------------|---------------------------------------|-------------|-------------|-------------|
| GI_20302161-S | 118.5  | 120.1  | 111.1  | GCG       | <a href="#">NM_002054.2</a> | GLP1;GLP2;GRPP                        | receptor    | soluble     | G-protein   |
| GI_20302162-S | 297    | 424    | 323.9  | PIP5K2A   | <a href="#">NM_005028.3</a> | PIPK;PIP5KII-alpha                    | 1-          |             | glyceroph   |
| GI_20302163-S | 94.2   | 91     | 81.8   | LGALS13   | <a href="#">NM_013268.2</a> | PP13;PLAC8                            | lysosphosp  |             | phospholi   |
| GI_20302164-S | 142.3  | 173.8  | 137.8  | TLR7      | <a href="#">NM_016562.2</a> |                                       | transmem    | integral to | immune      |
| GI_20302165-I | 97.2   | 108.8  | 98.1   | TLR8      | <a href="#">NM_016610.2</a> |                                       | transmem    | integral to | NIK-I-      |
| GI_20302167-A | 202.3  | 223.6  | 207.8  | TLR8      | <a href="#">NM_138636.1</a> |                                       | transmem    | integral to | NIK-I-      |
| GI_20302169-I | 180.7  | 204.9  | 200.7  | TLR9      | <a href="#">NM_017442.2</a> |                                       | antibacteri | extracellul | response    |
| GI_20302170-A | 113.7  | 110.6  | 122.6  | TLR9      | <a href="#">NM_138688.1</a> |                                       | antibacteri | extracellul | response    |
| GI_20304090-S | 145    | 139.3  | 133.8  | ZNF2      | <a href="#">NM_021088.1</a> | A1-5                                  |             |             |             |
| GI_20304092-S | 159.2  | 196.4  | 187.1  | TMC2      | <a href="#">NM_080751.1</a> | C20orf145;dJ686C3.3                   | DNA         | integral to | regulation  |
| GI_20304126-S | 177.9  | 185.5  | 188.5  | LOC150379 | <a href="#">NM_138814.1</a> | dJ388M5.4                             | catalytic   |             |             |
| GI_20336185-A | 243.8  | 161.5  | 139.7  | PACE4     | <a href="#">NM_138322.1</a> | SPC4;PCSK6                            | subtilase   |             | proteolysis |
| GI_20336185-I | 120.2  | 127.8  | 114.6  | PACE4     | <a href="#">NM_138322.1</a> | SPC4;PCSK6                            | subtilase   |             | proteolysis |
| GI_20336193-S | 633.5  | 895.7  | 752.2  | FURIN     | <a href="#">NM_002569.2</a> | FUR;PACE;SPC1;PCSK3                   | furin       | Golgi       | proteolysis |
| GI_20336194-I | 105.5  | 109.7  | 84     | AKAP7     | <a href="#">NM_016377.2</a> | AKAP18                                | protein     | plasma      | ion         |
| GI_20336195-I | 132.3  | 143.7  | 135.1  | AKAP7     | <a href="#">NM_138633.1</a> | AKAP18                                | protein     | plasma      | ion         |
| GI_20336197-A | 512.3  | 390.2  | 310.9  | AKAP7     | <a href="#">NM_004842.2</a> | AKAP18                                | protein     | plasma      | ion         |
| GI_20336200-A | 117.7  | 123.2  | 119.4  | ATM       | <a href="#">NM_138293.1</a> | AT1;ATA;ATC;ATD;ATE;ATDC              | protein     | nucleus     | DNA         |
| GI_20336200-I | 102.6  | 110.4  | 103.9  | ATM       | <a href="#">NM_138293.1</a> | AT1;ATA;ATC;ATD;ATE;ATDC              | protein     | nucleus     | DNA         |
| GI_20336202-I | 154.7  | 178.4  | 157.3  | ATM       | <a href="#">NM_000051.2</a> | AT1;ATA;ATC;ATD;ATE;ATDC              | protein     | nucleus     | DNA         |
| GI_20336204-A | 822.6  | 849.5  | 801.9  | ATRX      | <a href="#">NM_138270.1</a> | SHS;XH2;XNP;ATR2;MRXS3;RAD54;RAD54    | helicase    | nuclear     | DNA         |
| GI_20336206-I | 90.2   | 91.4   | 83.6   | ATRX      | <a href="#">NM_138271.1</a> | SHS;XH2;XNP;ATR2;MRXS3;RAD54;RAD54    | helicase    | nuclear     | DNA         |
| GI_20336210-I | 906.1  | 1324.1 | 1135.5 | GAMT      | <a href="#">NM_000156.4</a> | PIG2;TP53I2                           | methyltran  |             | creatine    |
| GI_20336211-A | 326.1  | 452.4  | 408.2  | GAMT      | <a href="#">NM_138924.1</a> | PIG2;TP53I2                           | methyltran  |             | creatine    |
| GI_20336211-I | 114.3  | 129.2  | 117.9  | GAMT      | <a href="#">NM_138924.1</a> | PIG2;TP53I2                           | methyltran  |             | creatine    |
| GI_20336213-I | 79.7   | 80.8   | 77.8   | GLS2      | <a href="#">NM_013267.2</a> | GA;GLS;LGA;hLGA                       | glutamina   | mitochond   | amino       |
| GI_20336215-A | 212.9  | 246.9  | 215.4  | GLS2      | <a href="#">NM_138566.1</a> | GA;GLS;LGA;hLGA                       | glutamina   | mitochond   | amino       |
| GI_20336218-A | 132.2  | 135.6  | 137.3  | RHCE      | <a href="#">NM_138616.1</a> | RHC;RHE;Rh4;RHPI;RhVI;RH30A;RHIXB;Rh  | blood       | integral to | transport   |
| GI_20336224-I | 101.8  | 127.3  | 98.1   | RHD       | <a href="#">NM_016124.2</a> | RH;Rh4;RH30;RhII;RhPI;DIILc;RHCEd;RHP | blood       | integral to | transport   |
| GI_20336226-A | 123    | 128.8  | 120    | RHD       | <a href="#">NM_016225.2</a> | RH;Rh4;RH30;RhII;RhPI;DIILc;RHCEd;RHP | blood       | integral to | transport   |
| GI_20336228-I | 89     | 97.5   | 90     | PPARG     | <a href="#">NM_015869.2</a> | NR1C3;PPARG1;PPARG2;HUMPPARG          | ligand-     | nucleus     | response    |
| GI_20336230-A | 146.1  | 344.2  | 153.8  | PPARG     | <a href="#">NM_005037.3</a> | NR1C3;PPARG1;PPARG2;HUMPPARG          | ligand-     | nucleus     | response    |
| GI_20336236-I | 289.3  | 351.7  | 341.5  | PPP1R8    | <a href="#">NM_002713.2</a> | ARD1;NIPP1;NIPP-1;PRO2047             | ribonuclea  | nucleus     | RNA         |
| GI_20336237-A | 181.4  | 180.3  | 160.8  | PPP1R8    | <a href="#">NM_014110.3</a> | ARD1;NIPP1;NIPP-1;PRO2047             | ribonuclea  | nucleus     | RNA         |
| GI_20336240-S | 242.8  | 296.3  | 267    | PCSK1N    | <a href="#">NM_013271.2</a> | SAAS;PROSAAS                          | endopepti   | soluble     |             |
| GI_20336241-S | 130.5  | 182.3  | 152.7  | PCSK1     | <a href="#">NM_000439.3</a> | PC1;PC3;NEC1;SPC3                     | subtilase   |             | proteolysis |
| GI_20336243-S | 85.2   | 89.7   | 80.7   | PCSK2     | <a href="#">NM_002594.2</a> | PC2;NEC2;SPC2                         | subtilase   | Golgi       | proteolysis |
| GI_20336245-S | 425.7  | 215    | 359.3  | PCSK5     | <a href="#">NM_006200.2</a> | PC5;PC6;PC6A;SPC6                     | serine-     | extracellul | proteolysis |
| GI_20336247-S | 360.6  | 475.9  | 420.3  | PCSK7     | <a href="#">NM_004716.2</a> | LPC;PC7;PC8;SPC7                      | subtilase   | integral to | proteolysis |
| GI_20336250-A | 176.5  | 177.1  | 277.6  | PPT2      | <a href="#">NM_138717.1</a> | G14;DKFZp564P1516                     | palmitoyl-  | lysosome    | protein     |
| GI_20336250-I | 141.5  | 165.4  | 155.2  | PPT2      | <a href="#">NM_138717.1</a> | G14;DKFZp564P1516                     | palmitoyl-  | lysosome    | protein     |
| GI_20336252-I | 164.6  | 158.1  | 141.8  | PPT2      | <a href="#">NM_138934.1</a> | G14;DKFZp564P1516                     | palmitoyl-  | lysosome    | protein     |
| GI_20336255-A | 264.9  | 270.6  | 356.6  | PIP5K2B   | <a href="#">NM_138687.1</a> | Pip4k2B;PIP5KIIB                      | 1-          | cytoplasm   | cell        |
| GI_20336255-I | 2960.3 | 3495.4 | 3123.2 | PIP5K2B   | <a href="#">NM_138687.1</a> | Pip4k2B;PIP5KIIB                      | 1-          | cytoplasm   | cell        |

|               |        |        |        |         |                             |                                         |             |              |             |
|---------------|--------|--------|--------|---------|-----------------------------|-----------------------------------------|-------------|--------------|-------------|
| GI_20336257-I | 144.7  | 163.1  | 138.2  | PRDM2   | <a href="#">NM_012231.2</a> | RIZ;RIZ1;RIZ2;MTB-ZF;HUMHOXY1           | zinc ion    | nucleus      | regulation  |
| GI_20336259-A | 93.6   | 104.1  | 91.8   | PRDM2   | <a href="#">NM_015866.2</a> | RIZ;RIZ1;RIZ2;MTB-ZF;HUMHOXY1           | zinc ion    | nucleus      | regulation  |
| GI_20336259-I | 321.9  | 375.6  | 381.2  | PRDM2   | <a href="#">NM_015866.2</a> | RIZ;RIZ1;RIZ2;MTB-ZF;HUMHOXY1           | zinc ion    | nucleus      | regulation  |
| GI_20336261-S | 604.2  | 834.2  | 748.6  | GGA1    | <a href="#">NM_013365.2</a> |                                         | protein     | kinesin      | intra-Golgi |
| GI_20336262-I | 336.7  | 435.1  | 376.6  | GGA2    | <a href="#">NM_015044.2</a> | VEAR;FLJ20966;KIAA1080                  | protein     | Golgi        | intra-Golgi |
| GI_20336263-A | 474.2  | 575.3  | 587.5  | GGA2    | <a href="#">NM_138640.1</a> | VEAR;FLJ20966;KIAA1080                  | protein     | Golgi        | intra-Golgi |
| GI_20336263-I | 147.8  | 157.4  | 150.2  | GGA2    | <a href="#">NM_138640.1</a> | VEAR;FLJ20966;KIAA1080                  | protein     | Golgi        | intra-Golgi |
| GI_20336265-A | 348.9  | 390.5  | 374.5  | GGA3    | <a href="#">NM_014001.2</a> | KIAA0154                                | protein     | Golgi        | intra-Golgi |
| GI_20336266-I | 108.2  | 101.9  | 99.2   | GGA3    | <a href="#">NM_138619.1</a> | KIAA0154                                | protein     | Golgi        | intra-Golgi |
| GI_20336268-A | 519.5  | 518.8  | 530.3  | GNB5    | <a href="#">NM_006578.2</a> | GB5;DKFZP586O1922                       |             |              |             |
| GI_20336268-I | 383.8  | 477.2  | 435.6  | GNB5    | <a href="#">NM_006578.2</a> | GB5;DKFZP586O1922                       |             |              |             |
| GI_20336269-I | 194.3  | 203.3  | 193.5  | GNB5    | <a href="#">NM_016194.2</a> | GB5;DKFZP586O1922                       |             |              |             |
| GI_20336271-I | 123.1  | 122.4  | 110.4  | SLC26A1 | <a href="#">NM_022042.2</a> | EDM4;SAT1;SAT-1                         |             |              |             |
| GI_20336273-A | 173.1  | 195.9  | 164.9  | SLC26A1 | <a href="#">NM_134425.1</a> | EDM4;SAT1;SAT-1                         |             |              |             |
| GI_20336273-I | 132.4  | 105    | 120    | SLC26A1 | <a href="#">NM_134425.1</a> | EDM4;SAT1;SAT-1                         |             |              |             |
| GI_20336278-A | 269.8  | 401.9  | 421.9  | SLC26A6 | <a href="#">NM_134426.1</a> | DKFZp586E1422                           |             |              |             |
| GI_20336280-I | 97.2   | 103.7  | 87.2   | SLC26A7 | <a href="#">NM_052832.2</a> | SUT2                                    | sulfate     | membran      | sulfate     |
| GI_20336281-A | 89.6   | 106.6  | 99.7   | SLC26A7 | <a href="#">NM_134266.1</a> | SUT2                                    | sulfate     | membran      | sulfate     |
| GI_20336281-I | 140.6  | 170.6  | 159.4  | SLC26A7 | <a href="#">NM_134266.1</a> | SUT2                                    | sulfate     | membran      | sulfate     |
| GI_20336283-I | 115    | 113    | 92.9   | SLC26A8 | <a href="#">NM_052961.2</a> | TAT1                                    | sulfate     | membran      | sulfate     |
| GI_20336284-A | 232.2  | 304.2  | 263.6  | SLC26A8 | <a href="#">NM_138718.1</a> | TAT1                                    | sulfate     | membran      | sulfate     |
| GI_20336284-I | 111.7  | 106.4  | 97.4   | SLC26A8 | <a href="#">NM_138718.1</a> | TAT1                                    | sulfate     | membran      | sulfate     |
| GI_20336286-I | 105.1  | 114.1  | 116.4  | SLC26A9 | <a href="#">NM_052934.2</a> |                                         | sulfate     | membran      | sulfate     |
| GI_20336287-A | 101.2  | 113.6  | 114.3  | SLC26A9 | <a href="#">NM_134325.1</a> |                                         | sulfate     | membran      | sulfate     |
| GI_20336291-A | 699.8  | 931.2  | 918.1  | DHX30   | <a href="#">NM_138614.1</a> | DDX30;FLJ11214;KIAA0890                 |             |              |             |
| GI_20336291-I | 153.2  | 165.7  | 159    | DHX30   | <a href="#">NM_138614.1</a> | DDX30;FLJ11214;KIAA0890                 |             |              |             |
| GI_20336295-S | 341.4  | 319.2  | 346.8  | DDX28   | <a href="#">NM_018380.2</a> | MDDX28;FLJ11282                         | nucleic     |              |             |
| GI_20336296-I | 269.2  | 271.8  | 244.2  | DDX31   | <a href="#">NM_022779.7</a> | FLJ13633;FLJ14578;FLJ23349              | nucleic     |              |             |
| GI_20336297-A | 186.6  | 194    | 175.5  | DDX31   | <a href="#">NM_138620.1</a> | FLJ13633;FLJ14578;FLJ23349              | nucleic     |              |             |
| GI_20336297-I | 89.1   | 85.1   | 89.8   | DDX31   | <a href="#">NM_138620.1</a> | FLJ13633;FLJ14578;FLJ23349              | nucleic     |              |             |
| GI_20336299-S | 1332   | 1520   | 1449.2 | DHX32   | <a href="#">NM_018180.2</a> | DDX32;DHLP1;FLJ10694;FLJ10889           |             |              |             |
| GI_20336301-S | 749.5  | 838    | 667.3  | DHX33   | <a href="#">NM_020162.2</a> | DDX33;FLJ21972;DKFZp762F2011            | nucleic     |              |             |
| GI_20336304-I | 422.2  | 624.1  | 399.7  | BCL11A  | <a href="#">NM_022893.2</a> | EVI9;CTIP1;BCL11A-L;BCL11A-             |             |              |             |
| GI_20336312-A | 107.4  | 118.2  | 103.9  | BCL11A  | <a href="#">NM_138559.1</a> | EVI9;CTIP1;BCL11A-L;BCL11A-             |             |              |             |
| GI_20336322-I | 117.1  | 142.6  | 139.5  | BCL2L11 | <a href="#">NM_138625.1</a> | BAM;BIM;BOD;BimL;BimEL                  |             | membran      | induction   |
| GI_20336326-A | 127    | 115.2  | 123.9  | BCL2L11 | <a href="#">NM_138627.1</a> | BAM;BIM;BOD;BimL;BimEL                  |             | membran      | induction   |
| GI_20336328-S | 161.7  | 200.5  | 179.7  | BCL2L10 | <a href="#">NM_020396.2</a> | Boo;Diva;BCL-B                          | apoptosis   | mitochond    | caspase     |
| GI_20336329-I | 726.1  | 893    | 808.8  | BCL2L12 | <a href="#">NM_138639.1</a> |                                         |             |              | apoptosis   |
| GI_20336331-A | 835.9  | 748    | 830.3  | BCL2L12 | <a href="#">NM_052842.2</a> |                                         |             |              | apoptosis   |
| GI_20336333-A | 2689.4 | 2078.1 | 3184.5 | BCL2L1  | <a href="#">NM_001191.2</a> | BCLX;BCL2L;Bcl-X;bcl-xL;bcl-xS;BCL-XL/S | apoptosis   | integral to  | apoptotic   |
| GI_20336334-I | 270.7  | 252    | 365.8  | BCL2L1  | <a href="#">NM_138578.1</a> | BCLX;BCL2L;Bcl-X;bcl-xL;bcl-xS;BCL-XL/S | apoptosis   | integral to  | apoptotic   |
| GI_20336470-S | 238.8  | 281.1  | 265.9  | BCL10   | <a href="#">NM_003921.2</a> | CLAP;mE10;CIPER;c-E10;CARMEN            | tumor       | intracellula | induction   |
| GI_20336471-S | 455.9  | 584.6  | 522.4  | BCL3    | <a href="#">NM_005178.2</a> | BCL4                                    | translation | nucleus      | cytoplasm   |
| GI_20336472-I | 267.7  | 284.1  | 275.3  | BCL7B   | <a href="#">NM_001707.2</a> |                                         |             |              |             |



|               |        |        |        |            |                             |                                      |            |                         |
|---------------|--------|--------|--------|------------|-----------------------------|--------------------------------------|------------|-------------------------|
| GI_20336474-A | 1286   | 1123.7 | 1200.2 | BCL7B      | <a href="#">NM_138707.1</a> |                                      |            |                         |
| GI_20336476-S | 403    | 411.4  | 415.6  | BCL7C      | <a href="#">NM_004765.2</a> |                                      |            |                         |
| GI_20336723-S | 246.4  | 271.3  | 231.1  | ZNF333     | <a href="#">NM_032433.1</a> | KIAA1806                             | DNA        | nucleus regulation      |
| GI_20336744-I | 100.9  | 90.9   | 88     | H2AFY      | <a href="#">NM_004893.2</a> | H2A.y;H2A/y;H2AFJ;mH2A1;H2AF12M;MAC  | DNA        | chromoso nucleoso       |
| GI_20336745-A | 5909.2 | 6673.7 | 7131.5 | H2AFY      | <a href="#">NM_138609.1</a> | H2A.y;H2A/y;H2AFJ;mH2A1;H2AF12M;MAC  | DNA        | chromoso nucleoso       |
| GI_20336745-I | 542.8  | 634.1  | 187.2  | H2AFY      | <a href="#">NM_138609.1</a> | H2A.y;H2A/y;H2AFJ;mH2A1;H2AF12M;MAC  | DNA        | chromoso nucleoso       |
| GI_20336749-S | 7269.9 | 8410.4 | 8880.2 | H2AFZ      | <a href="#">NM_002106.2</a> | H2AZ                                 | DNA        | chromoso nucleoso       |
| GI_20336750-A | 414.3  | 751.1  | 351.6  | HIST1H2BD  | <a href="#">NM_021063.2</a> | H2B/b;H2BFB;H2B.1B;HIRIP2;dJ221C16.6 | DNA        | chromoso nucleoso       |
| GI_20336750-I | 89.6   | 104.2  | 93.6   | HIST1H2BD  | <a href="#">NM_021063.2</a> | H2B/b;H2BFB;H2B.1B;HIRIP2;dJ221C16.6 | DNA        | chromoso nucleoso       |
| GI_20336751-I | 604.3  | 1199.1 | 411.9  | HIST1H2BD  | <a href="#">NM_138720.1</a> | H2B/b;H2BFB;H2B.1B;HIRIP2;dJ221C16.6 | DNA        | chromoso nucleoso       |
| GI_20336753-S | 122    | 141.5  | 145.3  | HIST1H2BJ  | <a href="#">NM_021058.3</a> | H2B/r;H2BFR                          | DNA        | chromoso nucleoso       |
| GI_20336758-S | 3480.9 | 2078.3 | 2756.6 | H1F0       | <a href="#">NM_005318.2</a> | H10;H1FV;MGC5241                     | DNA        | chromoso nucleoso       |
| GI_20336759-S | 8763   | 6387.8 | 6464.3 | H1FX       | <a href="#">NM_006026.2</a> | H1X;MGC8350;MGC15959                 | DNA        | chromoso nucleoso       |
| GI_20336760-S | 1627.5 | 1293.7 | 1374.2 | HEBP1      | <a href="#">NM_015987.2</a> | HBP;HEBP                             | binding    | circadian               |
| GI_20336762-A | 138.3  | 167.8  | 252.2  | HRIHFB2122 | <a href="#">NM_138632.1</a> | KIAA1662;dJ37E16.4                   | F-actin    | kinesin actin           |
| GI_20336762-I | 223.6  | 279.4  | 814.6  | HRIHFB2122 | <a href="#">NM_138632.1</a> | KIAA1662;dJ37E16.4                   | F-actin    | kinesin actin           |
| GI_20336764-S | 121.3  | 135.8  | 113.6  | ACYP2      | <a href="#">NM_138448.2</a> | ACYM;ACYP                            | acylphosp  | phosphate               |
| GI_20357503-I | 104.6  | 105.6  | 89.4   | BPAG1      | <a href="#">NM_020388.2</a> | BPA;BP240;CATX-                      |            | basement cytoskeleton   |
| GI_20357509-A | 141.2  | 163.9  | 147.8  | MSR1       | <a href="#">NM_002445.2</a> | SR-A;phSR1;phSR2;SCARA1              | scavenger  | integral to receptor    |
| GI_20357509-I | 112.2  | 111.3  | 96     | MSR1       | <a href="#">NM_002445.2</a> | SR-A;phSR1;phSR2;SCARA1              | scavenger  | integral to receptor    |
| GI_20357511-I | 80.1   | 93.5   | 83.7   | MSR1       | <a href="#">NM_138715.1</a> | SR-A;phSR1;phSR2;SCARA1              | scavenger  | integral to receptor    |
| GI_20357519-S | 833.5  | 1023.6 | 914.6  | UMPCK      | <a href="#">NM_012474.3</a> | UK;UMK;UCK2;TSA903                   | uridine    | carbohydr               |
| GI_20357521-S | 1598.9 | 1918.9 | 1992.3 | JMJD1      | <a href="#">NM_018433.2</a> | TSGA;KIAA0742                        |            |                         |
| GI_20357526-S | 5452.1 | 5327.1 | 5477.1 | GNB1       | <a href="#">NM_002074.2</a> |                                      | heterotrim | peripheral acetyl       |
| GI_20357528-S | 3039.1 | 3083.8 | 3184.6 | GNB2       | <a href="#">NM_005273.2</a> |                                      | heterotrim | peripheral G-protein    |
| GI_20357531-S | 135.3  | 128.7  | 125.8  | GNB4       | <a href="#">NM_021629.2</a> |                                      | signal     | heterotrim G-protein    |
| GI_20357534-S | 2931.1 | 2881.4 | 3021.6 | ATP6V1G1   | <a href="#">NM_004888.2</a> | ATP6J;Vma10;ATP6G1;ATP6GL            | hydrogen   | proton                  |
| GI_20357536-I | 158.3  | 206.5  | 219.1  | ATP6V1G2   | <a href="#">NM_130463.2</a> | NG38;ATP6G;Vma10;ATP6G2              | hydrogen   | proton                  |
| GI_20357538-A | 248.1  | 435.4  | 520.2  | ATP6V1G2   | <a href="#">NM_138282.1</a> | NG38;ATP6G;Vma10;ATP6G2              | hydrogen   | proton                  |
| GI_20357541-A | 120.9  | 134.1  | 113.9  | ATP6V1G3   | <a href="#">NM_133262.2</a> | Vma10;ATP6G3                         | hydrogen   | proton                  |
| GI_20357546-S | 3238.2 | 3071.9 | 4303.3 | ATP6V1F    | <a href="#">NM_004231.2</a> | VATF;Vma7;ATP6S14                    | hydrogen   | coated proton           |
| GI_20357549-S | 909    | 1139.9 | 1247.9 | SMP1       | <a href="#">NM_014313.2</a> |                                      |            | integral to             |
| GI_20357551-I | 157.4  | 186.9  | 159.3  | EMS1       | <a href="#">NM_005231.2</a> | Cttn                                 |            | soluble                 |
| GI_20357555-A | 3037.3 | 2833.1 | 3728.3 | EMS1       | <a href="#">NM_138565.1</a> | Cttn                                 |            | soluble                 |
| GI_20357561-S | 149.8  | 136.7  | 108.3  | CSTA       | <a href="#">NM_005213.2</a> | STF1;STFA                            | cysteine   |                         |
| GI_20357564-S | 2696.8 | 2529.6 | 2388.6 | CSTB       | <a href="#">NM_000100.2</a> | PME;CST6;STFB                        | endopepti  | nucleus                 |
| GI_20357567-S | 570.8  | 578.1  | 670.1  | AASDHPPT   | <a href="#">NM_015423.2</a> | LYS2;LYS5;CGI-80;AASD-               |            |                         |
| GI_20357571-A | 111.8  | 118    | 110.5  | ACF        | <a href="#">NM_014576.2</a> | ASP;ACF64;ACF65                      | RNA        | mRNA                    |
| GI_20357577-I | 80.5   | 88.3   | 75.7   | ACF        | <a href="#">NM_138933.1</a> | ASP;ACF64;ACF65                      | RNA        | mRNA                    |
| GI_20357584-I | 157.6  | 208.2  | 184.2  | TAF1       | <a href="#">NM_004606.2</a> | OF;BA2R;CCG1;CCGS;P250;NSCL2;TAF2A;  | general    | transcripti G1-         |
| GI_20357587-A | 162.7  | 169.9  | 162    | TAF1       | <a href="#">NM_138923.1</a> | OF;BA2R;CCG1;CCGS;P250;NSCL2;TAF2A;  | general    | transcripti G1-         |
| GI_20357590-S | 627.8  | 697.3  | 620.2  | TAF2       | <a href="#">NM_003184.2</a> | TAF2B;CIF150;TAFII150                | RNA        | transcripti transcripti |
| GI_20357592-S | 90.2   | 97.7   | 87.3   | BSND       | <a href="#">NM_057176.2</a> | BART                                 |            |                         |
| GI_20357594-S | 278.8  | 308.1  | 335.3  | GLTP       | <a href="#">NM_016433.2</a> |                                      |            | lipid                   |

|               |         |        |        |            |                             |                                     |            |             |             |
|---------------|---------|--------|--------|------------|-----------------------------|-------------------------------------|------------|-------------|-------------|
| GI_20357598-I | 602.8   | 690.4  | 898.5  | H2AV       | <a href="#">NM_138635.1</a> | MGC1947;MGC10170;MGC10831           |            |             |             |
| GI_20373152-S | 521.2   | 955.3  | 307.1  | MYO18B     | <a href="#">NM_032608.4</a> | BK125H2.1                           | ATP        | myosin      |             |
| GI_20373170-S | 187.9   | 238    | 224.8  | VANGL1     | <a href="#">NM_138959.1</a> | LPP2;STB2;MGC5338                   |            | integral to |             |
| GI_20373176-S | 10344.2 | 8888.1 | 6565.8 | RPS4Y2     | <a href="#">NM_138963.1</a> |                                     | structural | ribosome    | protein     |
| GI_20428651-S | 169.2   | 252.9  | 184.1  | LCK        | <a href="#">NM_005356.2</a> |                                     | protein-   | membran     | RAS         |
| GI_20428653-S | 13813.5 | 13745  | 12100  | CALM2      | <a href="#">NM_001743.3</a> | PHKD;CAMII;PHKD2                    | calcium    | cytoplasm   | G-protein   |
| GI_20428778-S | 93.9    | 110.5  | 98.9   | MYO3B      | <a href="#">NM_138995.1</a> |                                     | ATP        | myosin      | protein     |
| GI_20452463-S | 207     | 177.9  | 111.2  | ESAM       | <a href="#">NM_138961.1</a> | W117m                               |            |             |             |
| GI_20452469-A | 149.9   | 183.9  | 164    | NETO1      | <a href="#">NM_138999.1</a> | BCTL1;BTCL1                         |            |             |             |
| GI_20452469-I | 98.6    | 102.2  | 110.4  | NETO1      | <a href="#">NM_138999.1</a> | BCTL1;BTCL1                         |            |             |             |
| GI_20468179-S | 142.6   | 177    | 156.9  | LOC196752  | <a href="#">XM_113596.1</a> |                                     |            |             |             |
| GI_20471320-S | 167.8   | 201    | 171.2  | LOC199897  | <a href="#">XM_117152.1</a> |                                     |            |             |             |
| GI_20472483-S | 117.6   | 109.1  | 100.3  | LOC220973  | <a href="#">XM_166707.1</a> |                                     |            |             |             |
| GI_20476634-S | 112.7   | 104.8  | 86     | DKFZp667E0 | <a href="#">XM_117353.1</a> |                                     |            |             |             |
| GI_20477602-S | 74.9    | 69.9   | 69.7   | LOC201651  | <a href="#">XM_114355.1</a> |                                     |            |             |             |
| GI_20478094-S | 129.4   | 143.8  | 131.1  | LOC203235  | <a href="#">XM_117514.1</a> |                                     |            |             |             |
| GI_20479073-S | 212.7   | 187.9  | 246.1  | LOC200205  | <a href="#">XM_114152.1</a> |                                     |            |             |             |
| GI_20481373-S | 109.3   | 130.3  | 102.1  | LOC219797  | <a href="#">XM_166747.1</a> |                                     |            |             |             |
| GI_20481991-S | 129.8   | 134.8  | 116    | LOC219437  | <a href="#">XM_166878.1</a> |                                     |            |             |             |
| GI_20481995-S | 123.2   | 139.7  | 130.6  | LOC219438  | <a href="#">XM_166879.1</a> |                                     |            |             |             |
| GI_20482069-S | 102.2   | 125.1  | 97.9   | LOC219473  | <a href="#">XM_166825.1</a> |                                     |            |             |             |
| GI_20482090-S | 201.1   | 267.7  | 235.4  | LOC219479  | <a href="#">XM_166831.1</a> |                                     |            |             |             |
| GI_20482131-S | 304.4   | 373.3  | 347.2  | LOC219493  | <a href="#">XM_166845.1</a> |                                     |            |             |             |
| GI_20482337-S | 88      | 90.1   | 97.5   | LOC219954  | <a href="#">XM_166912.1</a> |                                     |            |             |             |
| GI_20482350-S | 114.7   | 127.1  | 112.9  | LOC219959  | <a href="#">XM_166917.1</a> |                                     |            |             |             |
| GI_20482352-S | 100.8   | 102.2  | 96.6   | LOC219960  | <a href="#">XM_166918.1</a> |                                     |            |             |             |
| GI_20482378-S | 162.2   | 189    | 165.2  | LOC219968  | <a href="#">XM_166926.1</a> |                                     |            |             |             |
| GI_20482422-S | 100.3   | 105.3  | 98.6   | LOC219981  | <a href="#">XM_166898.1</a> |                                     |            |             |             |
| GI_20485835-S | 502.8   | 615    | 567.8  | LOC199680  | <a href="#">XM_117112.1</a> |                                     |            |             |             |
| GI_20502985-S | 380     | 415.2  | 416.2  | ERK8       | <a href="#">NM_139021.1</a> |                                     | MAP        |             | protein     |
| GI_20514779-A | 135.3   | 147.5  | 126.9  | SPPL2B     | <a href="#">NM_020172.1</a> | IMP4;PSL1;KIAA1532                  | peptidase  | integral to | proteolysis |
| GI_20522237-S | 210.2   | 249.4  | 206.3  | CYP21A2    | <a href="#">NM_000500.4</a> | CAH1;CPS1;CA21H;CYP21;CYP21B;P450c2 | steroid    |             |             |
| GI_20522238-S | 254.5   | 344.7  | 253.9  | CYP2S1     | <a href="#">NM_030622.5</a> |                                     | monooxyg   |             | electron    |
| GI_20522239-S | 182.1   | 204.9  | 207.8  | CYP2A6     | <a href="#">NM_000762.4</a> | CPA6;CYP2A;CYP2A3;P450PB;P450C2A    | coumarin   | microsom    | electron    |
| GI_20522261-S | 146.7   | 158.4  | 129.8  | CYP2B6     | <a href="#">NM_000767.4</a> | CPB6;IIB1;P450;CYP2B;CYPIIB6        | monooxyg   | membran     | electron    |
| GI_20531764-S | 246.8   | 211    | 202.5  | C13orf1    | <a href="#">NM_020456.1</a> | CLLD6                               |            |             |             |
| GI_20532905-S | 117.6   | 126.6  | 130.8  | LOC152122  | <a href="#">XM_098164.4</a> |                                     |            |             |             |
| GI_20533843-S | 79.8    | 89.7   | 80.3   | MYT1L      | <a href="#">XM_039762.4</a> |                                     |            |             |             |
| GI_20534043-S | 103.5   | 111.4  | 112.4  | LOC200475  | <a href="#">XM_117236.1</a> |                                     |            |             |             |
| GI_20534796-S | 224.1   | 275.4  | 249.9  | LOC90342   | <a href="#">XM_031009.5</a> |                                     |            |             |             |
| GI_20534826-S | 275.3   | 312.4  | 283.3  | LOC127623  | <a href="#">XM_060580.4</a> |                                     |            |             |             |
| GI_20535783-S | 99.2    | 93     | 93.4   | LOC200624  | <a href="#">XM_117257.1</a> |                                     |            |             |             |
| GI_20537324-S | 145.5   | 165.4  | 180.2  | LOC200731  | <a href="#">XM_117268.1</a> |                                     |            |             |             |
| GI_20537349-S | 123.4   | 129.2  | 112    | CIP98      | <a href="#">XM_027012.2</a> |                                     |            |             |             |

|               |        |        |        |           |                             |                                      |             |                            |
|---------------|--------|--------|--------|-----------|-----------------------------|--------------------------------------|-------------|----------------------------|
| GI_20537481-S | 79.8   | 83.5   | 78.4   | LOC157943 | <a href="#">XM_098847.4</a> |                                      |             |                            |
| GI_20540354-S | 101.4  | 113.7  | 104.7  | LOC153134 | <a href="#">XM_098317.2</a> |                                      |             |                            |
| GI_20543127-S | 91.7   | 107.9  | 91.4   | LOC202201 | <a href="#">XM_116384.1</a> |                                      |             |                            |
| GI_20543268-S | 280    | 354.3  | 317    | LOC196913 | <a href="#">XM_113776.1</a> |                                      |             |                            |
| GI_20544128-S | 316    | 260.2  | 412.2  | DHX35     | <a href="#">NM_021931.2</a> | DDX35;C20orf15;FLJ22759;KAIA0875     | nucleic     |                            |
| GI_20544135-I | 96.9   | 96.7   | 98.7   | CASPR4    | <a href="#">NM_033401.2</a> | KIAA1763                             |             |                            |
| GI_20544136-A | 103    | 90.5   | 86.7   | CASPR4    | <a href="#">NM_138994.1</a> | KIAA1763                             |             |                            |
| GI_20544136-I | 80.6   | 84.6   | 77     | CASPR4    | <a href="#">NM_138994.1</a> | KIAA1763                             |             |                            |
| GI_20544138-I | 163.9  | 184    | 154    | caspr5    | <a href="#">NM_130773.2</a> | FLJ31966                             |             |                            |
| GI_20544140-S | 377.5  | 366.6  | 492    | TAF4      | <a href="#">NM_003185.2</a> | TAF2C;TAF4A;TAF2C1;TAFII130;TAFII135 | protein     | transcripti<br>regulation  |
| GI_20544141-A | 110.3  | 119.7  | 121.5  | caspr5    | <a href="#">NM_138996.1</a> | FLJ31966                             |             |                            |
| GI_20544143-A | 4636.9 | 4226.7 | 5542.2 | CSNK1D    | <a href="#">NM_001893.3</a> | HCKID                                | casein      | protein                    |
| GI_20544144-I | 952.9  | 1112.6 | 1103.3 | CSNK1D    | <a href="#">NM_139062.1</a> | HCKID                                | casein      | protein                    |
| GI_20544150-I | 991.9  | 1239.7 | 767.4  | CBX3      | <a href="#">NM_016587.2</a> | HECH;GAMMA;HP1-GAMMA;HP1Hs-gamma     | chromatin   | chromatin<br>chromatin     |
| GI_20544152-A | 3440.2 | 3270.3 | 2410.2 | CBX3      | <a href="#">NM_007276.3</a> | HECH;GAMMA;HP1-GAMMA;HP1Hs-gamma     | chromatin   | chromatin<br>chromatin     |
| GI_20544152-I | 484.3  | 608.7  | 522.8  | CBX3      | <a href="#">NM_007276.3</a> | HECH;GAMMA;HP1-GAMMA;HP1Hs-gamma     | chromatin   | chromatin<br>chromatin     |
| GI_20544161-S | 97.1   | 107.1  | 95.7   | HIST1H1D  | <a href="#">NM_005320.2</a> | H1.3;H1F3                            | DNA         | chromoso<br>nucleoso       |
| GI_20544164-S | 107.3  | 120.1  | 114.5  | HIST1H1E  | <a href="#">NM_005321.2</a> | H1.4;H1F4;dJ221C16.5                 | DNA         | chromoso<br>nucleoso       |
| GI_20544167-S | 81.6   | 94.5   | 80.7   | HIST1H1T  | <a href="#">NM_005323.3</a> | H1t;H1FT;dJ221C16.2                  | DNA         | chromoso<br>spermatog      |
| GI_20544171-S | 114.4  | 157.3  | 211.1  | BDKRB1    | <a href="#">NM_000710.2</a> | B1R;BKR1;B1BKR;BRADYB1               | bradykinin  | endoplas<br>cytosolic      |
| GI_20544175-S | 104    | 93.9   | 101.8  | BHMT2     | <a href="#">NM_017614.3</a> | FLJ20001                             | homocyst    |                            |
| GI_20544178-S | 571.5  | 569.5  | 502.7  | TBP       | <a href="#">NM_003194.2</a> | GTF2D;SCA17;TFIID;GTF2D1             | RNA         | transcripti<br>transcripti |
| GI_20544181-S | 1182.8 | 1139.3 | 1260.3 | WDR13     | <a href="#">NM_017883.3</a> | FLJ20563                             |             | nucleus                    |
| GI_20544184-S | 260.1  | 278.7  | 260.2  | YAF2      | <a href="#">NM_005748.2</a> |                                      | transcripti | nucleus<br>negative        |
| GI_20544188-I | 111.4  | 118.9  | 107.8  | TNXB      | <a href="#">NM_019105.4</a> | XB;TNX;XBS;HXBL;TENX;TNXB1;TNXB2;T   |             |                            |
| GI_20545519-S | 93.9   | 128.7  | 84.8   | LOC202324 | <a href="#">XM_117385.1</a> |                                      |             |                            |
| GI_20546300-S | 110.2  | 120.6  | 107.7  | LOC153770 | <a href="#">XM_087761.2</a> |                                      |             |                            |
| GI_20546504-S | 288.4  | 321.5  | 314.1  | KIAA1957  | <a href="#">XM_065166.2</a> |                                      |             |                            |
| GI_20547346-S | 132.8  | 146.6  | 132.4  | LOC203413 | <a href="#">XM_117548.1</a> |                                      |             |                            |
| GI_20547782-S | 118.8  | 122.4  | 99.9   | LOC134701 | <a href="#">XM_059730.2</a> |                                      |             |                            |
| GI_20550092-S | 261.7  | 324.2  | 343.6  | LOC145788 | <a href="#">XM_085236.4</a> |                                      |             |                            |
| GI_20552934-S | 117.9  | 108.3  | 109.9  | LOC202546 | <a href="#">XM_117408.1</a> |                                      |             |                            |
| GI_20553753-S | 199.6  | 177.6  | 183.2  | KIAA1971  | <a href="#">XM_058720.5</a> |                                      |             |                            |
| GI_20554311-S | 119.7  | 123.2  | 127.5  | LOC158830 | <a href="#">XM_088684.2</a> |                                      |             |                            |
| GI_20554837-S | 131.4  | 129.7  | 114.3  | HMGCLL1   | <a href="#">XM_166383.1</a> |                                      |             |                            |
| GI_20554839-S | 323.3  | 409    | 365.5  | LOC221344 | <a href="#">XM_168073.1</a> |                                      |             |                            |
| GI_20555412-S | 910.5  | 817.8  | 975.7  | BRPF3     | <a href="#">XM_166450.1</a> |                                      |             |                            |
| GI_20555643-S | 1349.6 | 1203.5 | 1009.6 | KIAA1949  | <a href="#">XM_166376.1</a> |                                      |             |                            |
| GI_20557667-S | 118.5  | 102.7  | 106.5  | LOC201109 | <a href="#">XM_117044.1</a> |                                      |             |                            |
| GI_20558728-S | 257.6  | 312.4  | 278.3  | LOC219858 | <a href="#">XM_166757.1</a> |                                      |             |                            |
| GI_20558763-S | 201.3  | 229    | 226.8  | LOC219870 | <a href="#">XM_166777.1</a> |                                      |             |                            |
| GI_20558775-S | 130.8  | 101.8  | 123.4  | LOC219874 | <a href="#">XM_166781.1</a> |                                      |             |                            |
| GI_20559322-S | 108.4  | 120.4  | 117.6  | LOC201201 | <a href="#">XM_117056.1</a> |                                      |             |                            |
| GI_20559681-S | 87.4   | 90.4   | 93.1   | LOC220061 | <a href="#">XM_169227.1</a> |                                      |             |                            |

|               |        |        |        |           |                             |                                      |             |                       |
|---------------|--------|--------|--------|-----------|-----------------------------|--------------------------------------|-------------|-----------------------|
| GI_20561649-S | 451.6  | 429.1  | 442.1  | ZNF319    | <a href="#">XM_168030.1</a> |                                      |             |                       |
| GI_20562142-S | 819.6  | 793.9  | 551.4  | KIAA1977  | <a href="#">XM_058800.3</a> | FLJ32345;FLJ32767                    |             |                       |
| GI_20562449-S | 99.1   | 105.6  | 117.5  | LOC197387 | <a href="#">XM_117030.1</a> |                                      |             |                       |
| GI_20589957-S | 300.8  | 358.4  | 274.6  | TPCN2     | <a href="#">NM_139075.1</a> | TPC2                                 | cation      | integral to cation    |
| GI_20589960-S | 670.6  | 476.6  | 351.4  | FLJ13614  | <a href="#">NM_139076.1</a> | FLJ11520;FLJ12642                    |             |                       |
| GI_20631970-S | 344.3  | 408.5  | 344.7  | C2        | <a href="#">NM_000063.3</a> | CO2                                  | trypsin     | compleme compleme     |
| GI_20631976-S | 692.4  | 876.8  | 1161   | CREBL1    | <a href="#">NM_004381.3</a> | G13;CREB-RP                          | transcripti | endoplas transcripti  |
| GI_20631979-I | 394.3  | 443.3  | 423.9  | DOM3Z     | <a href="#">NM_005510.2</a> | NG6;DOM3L                            |             |                       |
| GI_20631983-S | 3815.1 | 3214.5 | 2785.2 | RDBP      | <a href="#">NM_002904.4</a> | RD;RDP;D6S45;NELF-E                  | RNA         | nucleus biological_   |
| GI_20631986-S | 3106.8 | 4062.7 | 3433.7 | SKIV2L    | <a href="#">NM_006929.3</a> | HLP;SKI2;DDX13;SKI2W;SKIV2           | ATP         | regulation            |
| GI_20665033-A | 233.9  | 243.9  | 264.4  | TNXB      | <a href="#">NM_032470.2</a> | XB;TNX;XBS;HXBL;TENX;TNXB1;TNXB2;T   |             |                       |
| GI_20665033-I | 128.5  | 141    | 135.5  | TNXB      | <a href="#">NM_032470.2</a> | XB;TNX;XBS;HXBL;TENX;TNXB1;TNXB2;T   |             |                       |
| GI_20806090-S | 224.9  | 258.3  | 227.1  | STAB2     | <a href="#">NM_017564.8</a> | FELL;FEX2;HARE;FEEL-2;FELL-2;STAB-   | hyaluronic  | cell                  |
| GI_20806094-S | 91     | 97.5   | 90.7   | ALS2CR8   | <a href="#">NM_024744.1</a> | CARF;FLJ21579;NYD-SP24               |             |                       |
| GI_20809252-A | 98.2   | 113.9  | 107.5  | GH1       | <a href="#">NM_022562.2</a> | GH;GHN;GH-N                          | peptide     | signal                |
| GI_20809253-A | 99.1   | 99     | 87.5   | GH2       | <a href="#">NM_022556.2</a> | GH;GHV;GH-V                          | peptide     |                       |
| GI_20809254-I | 126.7  | 144.3  | 123.6  | GH2       | <a href="#">NM_022557.2</a> | GH;GHV;GH-V                          | peptide     |                       |
| GI_20819960-I | 142.7  | 155.6  | 149.1  | CSH1      | <a href="#">NM_022640.2</a> | PL;CSA;CSMT                          | growth      | extracellul pregnancy |
| GI_20819972-A | 95.8   | 92.3   | 103.1  | CSH1      | <a href="#">NM_022642.2</a> | PL;CSA;CSMT                          | growth      | extracellul pregnancy |
| GI_20819984-I | 141.9  | 151.6  | 135.4  | CSH2      | <a href="#">NM_022644.2</a> | CSB                                  | growth      | extracellul pregnancy |
| GI_20819996-A | 97.2   | 102.2  | 97.6   | CSH2      | <a href="#">NM_022646.2</a> | CSB                                  | growth      | extracellul pregnancy |
| GI_20911032-S | 141.8  | 144.9  | 137    | LOC90346  | <a href="#">NM_138351.2</a> |                                      |             |                       |
| GI_20977540-S | 186.9  | 190.2  | 179.1  | ARHGAP21  | <a href="#">NM_020824.1</a> | ARHGAP10;KIAA1424                    | protein     | intracellula          |
| GI_20986484-S | 1811.7 | 1757.2 | 1889   | YAP1      | <a href="#">NM_006106.2</a> | YAP;YAP2;YAP65                       | protein     |                       |
| GI_20986485-I | 96.4   | 103.1  | 93.8   | YAP       | <a href="#">NM_018253.2</a> | HCCA2;FLJ10875;FLJ13914              |             |                       |
| GI_20986494-I | 118.6  | 120.8  | 111    | YAP       | <a href="#">NM_139121.1</a> | HCCA2;FLJ10875;FLJ13914              |             |                       |
| GI_20986496-I | 85.4   | 97.4   | 87.2   | MAPK7     | <a href="#">NM_002749.2</a> | BMK1;ERK4;ERK5;PRKM7                 | MAP         | signal                |
| GI_20986498-A | 599.9  | 778.5  | 836.6  | MAPK7     | <a href="#">NM_139032.1</a> | BMK1;ERK4;ERK5;PRKM7                 | MAP         | signal                |
| GI_20986504-I | 158.3  | 176.1  | 160.6  | MAPK10    | <a href="#">NM_002753.2</a> | JNK3;JNK3A;PRKM10;p493F12;FLJ12099;p | JUN         | nucleus signal        |
| GI_20986505-I | 107    | 108.9  | 103.2  | MAPK10    | <a href="#">NM_138980.1</a> | JNK3;JNK3A;PRKM10;p493F12;FLJ12099;p | JUN         | nucleus signal        |
| GI_20986507-A | 143.2  | 188.6  | 146.4  | MAPK10    | <a href="#">NM_138981.1</a> | JNK3;JNK3A;PRKM10;p493F12;FLJ12099;p | JUN         | nucleus signal        |
| GI_20986507-I | 106.4  | 106.2  | 99.6   | MAPK10    | <a href="#">NM_138981.1</a> | JNK3;JNK3A;PRKM10;p493F12;FLJ12099;p | JUN         | nucleus signal        |
| GI_20986513-A | 153.6  | 143.8  | 138.9  | MAPK14    | <a href="#">NM_139013.1</a> | RK;p38;EXIP;Mxi2;CSBP1;CSBP2;CSPB1;P | MAP         | cytoplasm chemotaxi   |
| GI_20986513-I | 98.4   | 111.4  | 104.4  | MAPK14    | <a href="#">NM_139013.1</a> | RK;p38;EXIP;Mxi2;CSBP1;CSBP2;CSPB1;P | MAP         | cytoplasm chemotaxi   |
| GI_20986517-S | 266.6  | 276.1  | 329.2  | MAPK8IP1  | <a href="#">NM_005456.2</a> | IB1;JIP-1;PRKM8IP                    | protein     | cytoplasm vesicle-    |
| GI_20986522-A | 121    | 127.8  | 112.4  | MAPK8     | <a href="#">NM_139049.1</a> | JNK;JNK1;PRKM8;SAPK1;JNK1A2;JNK21B1  | JUN         | nucleus response      |
| GI_20986524-I | 458    | 537.8  | 468.1  | MAPK11    | <a href="#">NM_002751.4</a> | P38B;SAPK2;p38-                      | MAP         | cellular_co response  |
| GI_20986525-A | 197.9  | 176.3  | 166.1  | MAPK11    | <a href="#">NM_138993.1</a> | P38B;SAPK2;p38-                      | MAP         | cellular_co response  |
| GI_20986527-S | 136.3  | 305.9  | 385.1  | MAPK13    | <a href="#">NM_002754.3</a> | SAPK4;PRKM13;p38delta                | MAP         | response              |
| GI_20986528-I | 1601.4 | 2035.1 | 1666.6 | MAPK1     | <a href="#">NM_002745.2</a> | ERK;p38;p40;p41;ERK2;ERT1;MAPK2;PRK  | protein     | induction             |
| GI_20986530-A | 318.1  | 347.7  | 326    | MAPK1     | <a href="#">NM_138957.1</a> | ERK;p38;p40;p41;ERK2;ERT1;MAPK2;PRK  | protein     | induction             |
| GI_20986530-I | 321.2  | 295.3  | 292.8  | MAPK1     | <a href="#">NM_138957.1</a> | ERK;p38;p40;p41;ERK2;ERT1;MAPK2;PRK  | protein     | induction             |
| GI_21040234-S | 110.1  | 124.2  | 113.6  | ALS2CR7   | <a href="#">NM_139158.1</a> |                                      | ATP         | protein               |
| GI_21040238-S | 94.3   | 102.1  | 100.1  | LOC91614  | <a href="#">NM_139160.1</a> | dJ85M6.4                             |             | intracellula          |

|               |        |        |        |           |                             |                                     |              |             |             |
|---------------|--------|--------|--------|-----------|-----------------------------|-------------------------------------|--------------|-------------|-------------|
| GI_21040244-S | 103    | 105.7  | 114.7  | ALS2CR12  | <a href="#">NM_139163.1</a> |                                     | kinesin      |             |             |
| GI_21040246-S | 93.5   | 108.4  | 98.7   | STARD4    | <a href="#">NM_139164.1</a> |                                     | cholesterol  | lipid       |             |
| GI_21040248-S | 133.5  | 162.4  | 139.4  | RAET1E    | <a href="#">NM_139165.1</a> | LETAL;ULBP4;bA350J20.7              |              |             |             |
| GI_21040252-S | 115.2  | 104.3  | 101.3  | SGCZ      | <a href="#">NM_139167.1</a> | ZSG1                                |              |             |             |
| GI_21040254-S | 184.4  | 197.9  | 204.4  | SFRS12    | <a href="#">NM_139168.1</a> | SRrp86;SRrp508;DKFZp564B176         | nucleic      | spliceoso   | nuclear     |
| GI_21040258-S | 95.6   | 97.4   | 90.5   | LOC146562 | <a href="#">NM_139170.1</a> |                                     |              |             |             |
| GI_21040260-S | 120.5  | 136.2  | 130.9  | STARD6    | <a href="#">NM_139171.1</a> |                                     | lipid        |             | lipid       |
| GI_21040262-S | 136.4  | 147.6  | 130.4  | MDAC1     | <a href="#">NM_139172.1</a> |                                     |              |             |             |
| GI_21040264-S | 147.3  | 148.4  | 132.9  | LOC150159 | <a href="#">NM_139173.1</a> |                                     |              |             |             |
| GI_21040268-S | 120.1  | 142.1  | 125    | RNF133    | <a href="#">NM_139175.1</a> | MGC27072                            | peptidase    |             | proteolysis |
| GI_21040270-S | 102    | 101.7  | 98.9   | NALP7     | <a href="#">NM_139176.1</a> | NOD12;PYPAF3                        | ATP          |             |             |
| GI_21040274-S | 1891   | 1411.9 | 1473.5 | DEPC-1    | <a href="#">NM_139178.1</a> |                                     |              |             |             |
| GI_21040276-S | 529    | 545.3  | 510.5  | LOC221955 | <a href="#">NM_139179.1</a> |                                     | triacylglyc  |             | lipid       |
| GI_21040313-I | 181.5  | 201    | 198.9  | SON       | <a href="#">NM_032195.1</a> | SON3;BASS1;DBP-                     | DNA          | nucleus     | anti-       |
| GI_21040317-I | 233.2  | 220.1  | 226    | SON       | <a href="#">NM_058183.2</a> | SON3;BASS1;DBP-                     | DNA          | nucleus     | anti-       |
| GI_21040319-A | 244.5  | 313.3  | 279.8  | SON       | <a href="#">NM_138925.1</a> | SON3;BASS1;DBP-                     | DNA          | nucleus     | anti-       |
| GI_21040321-I | 220.7  | 282.9  | 221.9  | SON       | <a href="#">NM_138926.1</a> | SON3;BASS1;DBP-                     | DNA          | nucleus     | anti-       |
| GI_21040323-A | 1822.4 | 1479.6 | 1284.8 | BCL6      | <a href="#">NM_001706.2</a> | BCL5;LAZ3;ZNF51                     | transcripti  | nucleus     | positive    |
| GI_21040323-I | 163.3  | 196.8  | 174.1  | BCL6      | <a href="#">NM_001706.2</a> | BCL5;LAZ3;ZNF51                     | transcripti  | nucleus     | positive    |
| GI_21040329-I | 116.2  | 119.7  | 124.8  | BCL2L14   | <a href="#">NM_138723.1</a> | BCLG                                |              |             |             |
| GI_21040331-A | 108.3  | 108.2  | 89.3   | BCL2L14   | <a href="#">NM_138724.1</a> | BCLG                                |              |             |             |
| GI_21040331-I | 136    | 159.3  | 147.9  | BCL2L14   | <a href="#">NM_138724.1</a> | BCLG                                |              |             |             |
| GI_21040333-A | 142.2  | 158.9  | 145.4  | BCL11B    | <a href="#">NM_138576.1</a> | RIT1;CTIP2;CTIP-2                   |              |             |             |
| GI_21040333-I | 144.1  | 145.3  | 140.3  | BCL11B    | <a href="#">NM_138576.1</a> | RIT1;CTIP2;CTIP-2                   |              |             |             |
| GI_21040335-I | 92.6   | 88.1   | 102.2  | BCL6      | <a href="#">NM_138931.1</a> | BCL5;LAZ3;ZNF51                     | transcripti  | nucleus     | positive    |
| GI_21040337-I | 110.7  | 119.9  | 123.7  | HFE       | <a href="#">NM_000410.2</a> | HH;HFE1;HLA-H                       |              | cytoplasm   | iron ion    |
| GI_21040356-A | 168.8  | 179.7  | 171.7  | HFE       | <a href="#">NM_139011.1</a> | HH;HFE1;HLA-H                       |              | cytoplasm   | iron ion    |
| GI_21040361-A | 2466.7 | 2417.6 | 2711.3 | BACE2     | <a href="#">NM_138992.1</a> | ASP1;BAE2;DRAP;AEPLC;ALP56;ASP21;CD | aspartic-    | membran     | protein     |
| GI_21040367-A | 705.6  | 1109.2 | 489.9  | BACE      | <a href="#">NM_138973.1</a> | ASP2;BACE1;HSPC104;KIAA1149         | beta-        | membran     | pathogene   |
| GI_21040370-A | 3260.7 | 3000.9 | 3968   | DDX39     | <a href="#">NM_005804.2</a> | BAT1;DDXL;MGC8417;MGC18203          |              | nucleus     |             |
| GI_21040372-I | 144.2  | 159.8  | 148.6  | DDX39     | <a href="#">NM_138998.1</a> | BAT1;DDXL;MGC8417;MGC18203          |              | nucleus     |             |
| GI_21070955-A | 1514.8 | 1845.7 | 1504.8 | COG4      | <a href="#">NM_015386.1</a> | COD1;DKFZp586E1519                  |              |             |             |
| GI_21070965-I | 105.4  | 111.2  | 100.1  | NRXN1     | <a href="#">NM_004801.2</a> | Hs.22998;KIAA0578                   | receptor     | integral to | axon        |
| GI_21070966-A | 98.4   | 98     | 94     | NRXN1     | <a href="#">NM_138735.1</a> | Hs.22998;KIAA0578                   | receptor     | integral to | axon        |
| GI_21070966-I | 117.1  | 133.3  | 115.7  | NRXN1     | <a href="#">NM_138735.1</a> | Hs.22998;KIAA0578                   | receptor     | integral to | axon        |
| GI_21070970-I | 175.6  | 203.6  | 178    | NRXN3     | <a href="#">NM_138970.1</a> | KIAA0743                            |              |             |             |
| GI_21070979-A | 7317.6 | 7094.5 | 6660.3 | PAM       | <a href="#">NM_138821.1</a> | PAL;PHM                             | peptidylgly  | soluble     | protein     |
| GI_21070992-A | 201.3  | 243.7  | 220.9  | PAP       | <a href="#">NM_138937.1</a> | HIP;PAP1;INGAP;PAP-H;REG-III        | lectin [goid | soluble     | cell        |
| GI_21070994-I | 105.2  | 109.4  | 101    | PAP       | <a href="#">NM_138938.1</a> | HIP;PAP1;INGAP;PAP-H;REG-III        | lectin [goid | soluble     | cell        |
| GI_21070996-S | 323.3  | 309.4  | 310.1  | STIM1     | <a href="#">NM_003156.2</a> | GOK;D11S4896E                       | protein      | kinesin     | positive    |
| GI_21070998-S | 141.2  | 153.2  | 147.9  | STIM2     | <a href="#">NM_020860.1</a> | KIAA1482                            | protein      | kinesin     | cell-cell   |
| GI_21071000-I | 228.8  | 251.7  | 256.1  | AMFR      | <a href="#">NM_001144.3</a> | GP78;RNF45                          | receptor     | membran     | cell        |
| GI_21071002-A | 1585   | 1779.2 | 1759.3 | AMFR      | <a href="#">NM_138958.1</a> | GP78;RNF45                          | receptor     | membran     | cell        |
| GI_21071004-S | 4624.9 | 3087.4 | 4111.4 | PHLDA2    | <a href="#">NM_003311.2</a> | IPL;BRW1C;BWR1C;HLDA2;TSSC3         | DNA          | nucleus     | imprinting  |

|               |        |        |        |          |                             |                                      |             |                            |
|---------------|--------|--------|--------|----------|-----------------------------|--------------------------------------|-------------|----------------------------|
| GI_21071005-S | 1970.2 | 1740.4 | 1780.3 | TSSC4    | <a href="#">NM_005706.2</a> | tumor                                |             |                            |
| GI_21071007-S | 245    | 198.5  | 167.2  | TCN1     | <a href="#">NM_001062.2</a> | TC1;TCI                              | binding     | vitamin                    |
| GI_21071009-S | 361.8  | 537    | 546.8  | TCN2     | <a href="#">NM_000355.2</a> | TC2;D22S676;D22S750                  | vitamin     | extracellul<br>vitamin     |
| GI_21071011-S | 101.4  | 127.2  | 101.8  | PRSS1    | <a href="#">NM_002769.2</a> | TRP1;TRY1;TRY4;TRYP1                 | trypsin     | extracellul<br>proteolysis |
| GI_21071012-S | 168.9  | 630.1  | 161.7  | PRSS2    | <a href="#">NM_002770.2</a> | TRY2;TRY8;TRYP2                      | trypsin     | proteolysis                |
| GI_21071013-A | 136.2  | 133.9  | 123.7  | EPS8L3   | <a href="#">NM_024526.2</a> | EPS8R3;FLJ21522;MGC16817             |             |                            |
| GI_21071019-A | 534.3  | 638.2  | 665.3  | ADCY6    | <a href="#">NM_020983.2</a> | KIAA0422                             | calcium/ca  | integral to<br>cAMP        |
| GI_21071022-S | 113.7  | 126    | 123.5  | HIST1H3C | <a href="#">NM_003531.2</a> | H3.1;H3/c;H3FC                       |             |                            |
| GI_21071023-S | 150    | 141.2  | 127.8  | HIST1H4D | <a href="#">NM_003539.3</a> | H4/b;H4FB;dJ221C16.9                 |             |                            |
| GI_21071024-S | 16329  | 13285  | 11326  | HIST1H4C | <a href="#">NM_003542.3</a> | H4/g;H4FG;dJ221C16.1                 |             |                            |
| GI_21071025-S | 888.8  | 2253.3 | 1492.2 | HIST1H1C | <a href="#">NM_005319.3</a> | H1.2;H1F2;MGC:3992                   | DNA         | chromoso<br>nucleoso       |
| GI_21071027-S | 96.3   | 84.3   | 83.2   | ANP32D   | <a href="#">NM_012404.2</a> | PP32R2                               |             | oncogene                   |
| GI_21071029-S | 160.8  | 197.9  | 179    | A1BG     | <a href="#">NM_130786.2</a> | A1B;ABG;GAB                          | molecular   | extracellul<br>biological_ |
| GI_21071031-S | 870.4  | 928.3  | 819.6  | DDX41    | <a href="#">NM_016222.2</a> | ABS;MGC8828                          | ATP         | nucleus<br>regulation      |
| GI_21071033-S | 108.3  | 129.9  | 107.9  | AHRR     | <a href="#">NM_020731.2</a> | AHH;AHHR;KIAA1234                    | signal      | signal                     |
| GI_21071035-A | 95.8   | 91.2   | 95.9   | BCOR     | <a href="#">NM_020926.2</a> | FLJ20285;KIAA1575                    |             |                            |
| GI_21071035-I | 95.9   | 96.7   | 102    | BCOR     | <a href="#">NM_020926.2</a> | FLJ20285;KIAA1575                    |             |                            |
| GI_21071036-I | 516    | 500.3  | 616.5  | BCOR     | <a href="#">NM_017745.4</a> | FLJ20285;KIAA1575                    |             |                            |
| GI_21071038-S | 160.9  | 192.3  | 161.1  | CN1      | <a href="#">NM_032649.4</a> | CPGL2;MGC10825                       | carboxype   | proteolysis                |
| GI_21071040-S | 83.6   | 87.8   | 87.6   | CNTNAP2  | <a href="#">NM_014141.3</a> | NRXN4;CASPR2;KIAA0868                | cell        | integral to<br>neuronal    |
| GI_21071041-S | 683.4  | 992.2  | 715.1  | YES1     | <a href="#">NM_005433.2</a> | Yes;C-YES;HsT441;P61-YES             | protein-    | protein                    |
| GI_21071042-S | 123.2  | 128.5  | 123.7  | SHH      | <a href="#">NM_000193.2</a> | HHG1;HLP3;HPE3;SMMC1                 | peptidase   | ventral                    |
| GI_21071045-A | 2340.6 | 2583.8 | 693.3  | SMARCA1  | <a href="#">NM_139035.1</a> | SWI2;SNF2L;SNF2L1;SNF2LB             | helicase    | nucleus<br>chromatin       |
| GI_21071047-I | 94.2   | 112.8  | 107.1  | SMARCA2  | <a href="#">NM_003070.2</a> | hBRM;Sth1p;BAF190;SNF2L2;SNF2LA;hSNF | helicase    | nucleoplas<br>regulation   |
| GI_21071049-A | 1004.6 | 981.5  | 1155.9 | SMARCA2  | <a href="#">NM_139045.1</a> | hBRM;Sth1p;BAF190;SNF2L2;SNF2LA;hSNF | helicase    | nucleoplas<br>regulation   |
| GI_21071051-I | 657.4  | 551.6  | 599.8  | SMARCA3  | <a href="#">NM_003071.2</a> | HLTF;ZBU1;HLTF1;RNF80;HIP116;SNF2L3; | adenosine   | nucleus<br>regulation      |
| GI_21071053-A | 2423.1 | 1843.7 | 1914.4 | SMARCA3  | <a href="#">NM_139048.1</a> | HLTF;ZBU1;HLTF1;RNF80;HIP116;SNF2L3; | adenosine   | nucleus<br>regulation      |
| GI_21071055-S | 1454   | 1675.5 | 1611.8 | SMARCA4  | <a href="#">NM_003072.2</a> | BRG1;BAF190;SNF2L4;SNF2LB;hSNF2B;SN  | helicase    | nucleoplas<br>regulation   |
| GI_21071057-S | 597.8  | 613.2  | 577.1  | SMARCA5  | <a href="#">NM_003601.2</a> | SNF2H;hSNF2H;WCRF135                 | helicase    | nucleoplas<br>chromatin    |
| GI_21071059-S | 759.4  | 652.5  | 642.3  | SMARCAL1 | <a href="#">NM_014140.2</a> | HARP;HHARP                           | DNA         | nucleus<br>DNA             |
| GI_21071064-A | 343.7  | 315.9  | 352.5  | TAF5     | <a href="#">NM_139052.1</a> | TAF2D;TAFII100                       | transcripti | transcripti<br>regulation  |
| GI_21071066-I | 175.9  | 185.9  | 183.2  | TAF5     | <a href="#">NM_006951.2</a> | TAF2D;TAFII100                       | transcripti | transcripti<br>regulation  |
| GI_21071068-S | 1653.1 | 1865.2 | 1569   | TBPL1    | <a href="#">NM_004865.2</a> | TLF;TLP;STUD;TRF2;MGC:8389;MGC:9620  | molecular   | transcripti<br>transcripti |
| GI_21071069-S | 101.8  | 90.4   | 95.7   | TMC1     | <a href="#">NM_138691.2</a> | DFNB7;DFNA36;DFNB11                  |             | integral to<br>hearing     |
| GI_21071072-A | 152.8  | 178.2  | 155.1  | KLF12    | <a href="#">NM_016285.2</a> | AP2REP;AP-2rep;HSPC122               | transcripti | nucleus<br>regulation      |
| GI_21071072-I | 255.7  | 315.7  | 283    | KLF12    | <a href="#">NM_016285.2</a> | AP2REP;AP-2rep;HSPC122               | transcripti | nucleus<br>regulation      |
| GI_21071073-I | 303.2  | 336.2  | 329.2  | KLF12    | <a href="#">NM_007249.3</a> | AP2REP;AP-2rep;HSPC122               | transcripti | nucleus<br>regulation      |
| GI_21071075-S | 104.1  | 105.4  | 110.5  | BMF      | <a href="#">NM_033503.2</a> |                                      |             |                            |
| GI_21071076-S | 598.1  | 766.2  | 682.6  | DAAM1    | <a href="#">NM_014992.1</a> | KIAA0666                             | actin       | kinesin<br>cytokinesi      |
| GI_21071078-S | 161.8  | 199.1  | 201.9  | EKI1     | <a href="#">NM_018638.3</a> | EKI                                  | ethanolam   | cytoplasm<br>phosphati     |
| GI_21071079-S | 375.5  | 426.2  | 403.1  | FBXL7    | <a href="#">NM_012304.3</a> | FBL6;FBL7;FLJ11609;KIAA0840          |             |                            |
| GI_21071080-S | 350.2  | 430.7  | 379.2  | GNB3     | <a href="#">NM_002075.2</a> |                                      | heterotrim  | peripheral<br>regulation   |
| GI_21071083-S | 2614.7 | 2046.8 | 2225.3 | RRM1     | <a href="#">NM_001033.2</a> | R1;RR1;RIR1                          | ribonucleo  | ribonucleo<br>DNA          |
| GI_21166354-S | 2741.6 | 2159.5 | 1741   | YT521    | <a href="#">NM_133370.1</a> | KIAA1966                             | DNA         | nucleus<br>mRNA            |

|               |         |        |        |           |                             |                                    |             |             |              |
|---------------|---------|--------|--------|-----------|-----------------------------|------------------------------------|-------------|-------------|--------------|
| GI_21166356-S | 2658.4  | 1900.7 | 1424   | HCCR1     | <a href="#">NM_015416.2</a> | HCCR-2;DKFZp586A011                |             |             |              |
| GI_21166358-S | 105.4   | 100.2  | 104.3  | GRK7      | <a href="#">NM_139209.1</a> | GPRK7                              | ATP         |             | vision       |
| GI_21166360-S | 364.6   | 396.1  | 369    | COG8      | <a href="#">NM_032382.2</a> | DOR1;FLJ22315                      | protein     | membran     | intracellula |
| GI_21166374-S | 2266    | 2608.6 | 2589.9 | TAF10     | <a href="#">NM_006284.2</a> | TAF2A;TAF2H;TAFII30                | RNA         | transcripti | transcripti  |
| GI_21166377-S | 485.5   | 613.1  | 715    | TAF9L     | <a href="#">NM_015975.3</a> | DN7;DN-7;TAFII31L;TFIID-31         | DNA         | transcripti | transcripti  |
| GI_21166381-I | 268.2   | 330.1  | 304    | NRXN2     | <a href="#">NM_138734.1</a> | KIAA0921                           | cell        | integral to | cell         |
| GI_21166383-A | 152.6   | 102    | 84.4   | HEPH      | <a href="#">NM_014799.2</a> | KIAA0698                           |             |             | copper ion   |
| GI_21166383-I | 96.6    | 92.6   | 90.4   | HEPH      | <a href="#">NM_014799.2</a> | KIAA0698                           |             |             | copper ion   |
| GI_21166384-I | 192.4   | 231.1  | 194.8  | HEPH      | <a href="#">NM_138737.1</a> | KIAA0698                           |             |             | copper ion   |
| GI_21166386-S | 950.8   | 1526.6 | 1410   | HIST1H2BH | <a href="#">NM_003524.2</a> | H2B/j;H2BFJ                        | DNA         | chromoso    | nucleoso     |
| GI_21166387-S | 89.7    | 101.4  | 100    | HIST1H2BI | <a href="#">NM_003525.2</a> | H2B/k;H2BFK                        |             |             |              |
| GI_21166388-S | 124     | 148.5  | 130.9  | HIST1H2BC | <a href="#">NM_003526.2</a> | H2B.1;H2B/l;H2BFL;dJ221C16.3       | DNA         | chromoso    | nucleoso     |
| GI_21166390-S | 92.8    | 97.4   | 96.9   | HIST1H4A  | <a href="#">NM_003538.3</a> | H4/a;H4FA                          | DNA         | chromoso    | nucleoso     |
| GI_21166391-S | 102.7   | 116.4  | 104.2  | HIST1H4F  | <a href="#">NM_003540.3</a> | H4;H4/c;H4FC                       |             |             |              |
| GI_21166392-S | 109     | 109.4  | 111.9  | HIST1H4B  | <a href="#">NM_003544.2</a> | H4/l;H4FI                          |             |             |              |
| GI_21166393-S | 93.3    | 123.3  | 106.6  | HIST1H4G  | <a href="#">NM_003547.2</a> | H4/l;H4FL                          | DNA         | nucleus     | nucleoso     |
| GI_21218437-S | 228.7   | 281.7  | 305.5  | P66beta   | <a href="#">NM_020699.1</a> | KIAA1150                           | transcripti | nucleus     | regulation   |
| GI_21237722-S | 936.1   | 1028.7 | 798.7  | ST13      | <a href="#">NM_003932.3</a> | HIP;HOP;P48;SNC6;HSPABP;FAM10A1;HS | Hsp70/Hs    | cytoplasm   | protein      |
| GI_21237724-S | 126.2   | 123.4  | 114.7  | PIK3CG    | <a href="#">NM_002649.2</a> | PI3K;PIK3;PI3CG;PI3Kgamma          | 1-          | phosphoin   | G-protein    |
| GI_21237727-S | 1166.8  | 1284.1 | 1232.2 | DHX16     | <a href="#">NM_003587.3</a> | DBP2;PRP8;DDX16                    | RNA         | nucleus     | RNA          |
| GI_21237729-A | 90.9    | 95.1   | 100.6  | MLC1      | <a href="#">NM_015166.2</a> | VL;LVM;MLC;KIAA0027                | ion         | integral to | transport    |
| GI_21237729-I | 125     | 139.9  | 127.7  | MLC1      | <a href="#">NM_015166.2</a> | VL;LVM;MLC;KIAA0027                | ion         | integral to | transport    |
| GI_21237731-I | 144.2   | 152.2  | 137    | MLC1      | <a href="#">NM_139202.1</a> | VL;LVM;MLC;KIAA0027                | ion         | integral to | transport    |
| GI_21237744-A | 628.6   | 546.4  | 599.9  | MAPK9     | <a href="#">NM_139070.1</a> | JNK2;JNK2A;JNK2B;PRKM9;JNK-        | JUN         |             | response     |
| GI_21237756-S | 110.3   | 124.9  | 106.9  | CD53      | <a href="#">NM_000560.2</a> | MOX44                              |             | integral to | signal       |
| GI_21237760-S | 15315.6 | 17028  | 15643  | CD81      | <a href="#">NM_004356.2</a> | S5.7;TAPA1                         |             | integral to | defense      |
| GI_21237762-S | 190.5   | 253.1  | 111.6  | CD9       | <a href="#">NM_001769.2</a> | BA2;P24;MIC3;MRP-1;DRAP-27         |             | integral to |              |
| GI_21237764-A | 610.7   | 494.5  | 522.8  | MAPKAPK5  | <a href="#">NM_003668.2</a> | PRAK                               | MAP         |             | response     |
| GI_21237772-I | 286     | 332.6  | 297.6  | MAPK8IP2  | <a href="#">NM_016431.2</a> | IB2;JIP2;PRKM8IPL                  | structural  | cytoplasm   | JNK          |
| GI_21237774-A | 97.8    | 103.7  | 99.2   | MAPK8IP2  | <a href="#">NM_139124.1</a> | IB2;JIP2;PRKM8IPL                  | structural  | cytoplasm   | JNK          |
| GI_21237780-S | 1241.2  | 1346.4 | 1366.9 | WASF3     | <a href="#">NM_006646.3</a> | SCAR3;WAVE3;KIAA0900               | actin       | kinesin     | protein      |
| GI_21237782-S | 748.4   | 867.9  | 765.5  | COG1      | <a href="#">NM_018714.1</a> | LDLB;KIAA1381;DKFZP762L1710        | protein     | membran     | Golgi        |
| GI_21237793-A | 120.1   | 161.3  | 161.1  | GIT2      | <a href="#">NM_139201.1</a> | CAT-2;KIAA0148                     | ARF         | nucleus     | regulation   |
| GI_21237793-I | 248.7   | 299    | 330.4  | GIT2      | <a href="#">NM_139201.1</a> | CAT-2;KIAA0148                     | ARF         | nucleus     | regulation   |
| GI_21237796-A | 615.6   | 582.3  | 581    | HDAC5     | <a href="#">NM_005474.3</a> | HD5;NY-CO-9;KIAA0600               | histone     | cytoplasm   | chromatin    |
| GI_21237796-I | 136.6   | 138.3  | 143.9  | HDAC5     | <a href="#">NM_005474.3</a> | HD5;NY-CO-9;KIAA0600               | histone     | cytoplasm   | chromatin    |
| GI_21237798-I | 123.1   | 125.9  | 109.2  | HDAC5     | <a href="#">NM_139205.1</a> | HD5;NY-CO-9;KIAA0600               | histone     | cytoplasm   | chromatin    |
| GI_21237801-S | 2037.6  | 2083   | 2255.8 | SMARCC1   | <a href="#">NM_003074.2</a> | Rsc8;SRG3;SWI3;BAF155;CRACC1       | transcripti | nucleoplas  | chromatin    |
| GI_21237804-I | 156.8   | 156.1  | 201.6  | SMARCC2   | <a href="#">NM_003075.2</a> | Rsc8;BAF170;CRACC2                 | transcripti | nucleoplas  | chromatin    |
| GI_21237807-A | 877.5   | 1029.7 | 943.6  | SMARCC2   | <a href="#">NM_139067.1</a> | Rsc8;BAF170;CRACC2                 | transcripti | nucleoplas  | chromatin    |
| GI_21237807-I | 93.6    | 104    | 109.2  | SMARCC2   | <a href="#">NM_139067.1</a> | Rsc8;BAF170;CRACC2                 | transcripti | nucleoplas  | chromatin    |
| GI_21245099-A | 199.3   | 255.5  | 229.2  | TA-NFKBH  | <a href="#">NM_032721.2</a> | MGC11314                           |             |             |              |
| GI_21245105-S | 116     | 116.6  | 117.8  | LIPH      | <a href="#">NM_139248.1</a> | PLA1B;mPA-PLA1                     | catalytic   |             | lipid        |
| GI_21245119-S | 162.6   | 209.2  | 181.9  | PPM1L     | <a href="#">NM_139245.1</a> | PP2CE;PP2C-epsilon                 | catalytic   |             |              |

|               |        |        |                 |                             |                                      |             |              |            |
|---------------|--------|--------|-----------------|-----------------------------|--------------------------------------|-------------|--------------|------------|
| GI_21245123-S | 96.5   | 100.1  | 104.3 Tenr      | <a href="#">NM_139243.1</a> | FLJ32741                             | adenosine   | intracellula | RNA        |
| GI_21245127-S | 90.9   | 92.4   | 92.8 FGD4       | <a href="#">NM_139241.1</a> | FRABP;FRABIN;ZFYVE6                  | zinc ion    |              |            |
| GI_21245131-S | 123.7  | 131.3  | 126.9 TA-KRP    | <a href="#">NM_032505.1</a> | KIAA1842                             | protein     |              |            |
| GI_21245133-S | 83.2   | 92.7   | 89.1 TA-LRRP    | <a href="#">NM_015350.1</a> | KIAA0231                             |             |              |            |
| GI_21264319-S | 115.3  | 105.1  | 111.2 NALP6     | <a href="#">NM_138329.1</a> | PYPAF5                               | defense/i   |              | defense    |
| GI_21264321-S | 100.6  | 107.6  | 99.4 TIZ        | <a href="#">NM_138330.1</a> | TBZF                                 | nucleic     | intracellula | regulation |
| GI_21264323-S | 91.4   | 105    | 97.8 TAR1       | <a href="#">NM_138327.1</a> | TA1                                  | receptor    | integral to  | G-protein  |
| GI_21264325-S | 112.6  | 121.8  | 113.4 RHBDL4    | <a href="#">NM_138328.1</a> | VRHO                                 | serine-     | integral to  |            |
| GI_21264327-S | 116.9  | 136.7  | 127.5 ACMSD     | <a href="#">NM_138326.1</a> |                                      | lyase       |              |            |
| GI_21264329-S | 458.5  | 458.6  | 426.5 LOC142678 | <a href="#">NM_080875.1</a> |                                      |             |              |            |
| GI_21264335-S | 136.9  | 164.1  | 147 RDS         | <a href="#">NM_000322.2</a> | RP7;AVMD;PRPH;AOFMD;PRPH2            | G-protein   | integral to  | vision     |
| GI_21264336-S | 813.2  | 1175.5 | 730.1 ARAP3     | <a href="#">NM_022481.4</a> | FLJ21065                             | DNA         | nucleus      | neuropepti |
| GI_21264338-S | 145.5  | 139.2  | 131.1 SOX12     | <a href="#">NM_006943.2</a> | SOX22                                | molecular   | nucleus      | regulation |
| GI_21264340-S | 3589.9 | 3365   | 3706.4 SMS      | <a href="#">NM_004595.2</a> | SpS;SPMSY                            | spermidin   |              | methionin  |
| GI_21264342-S | 141.5  | 140.7  | 147.1 SAFB      | <a href="#">NM_002967.2</a> | HAP;HET;SAFB1                        | double-     | nucleus      | establish  |
| GI_21264344-S | 224.8  | 270.3  | 214.3 PRPH      | <a href="#">NM_006262.2</a> | NEF4                                 | structural  | intermedia   |            |
| GI_21264347-A | 3085.4 | 2562.8 | 2829.5 SMARCD1  | <a href="#">NM_139071.1</a> | BAF60A;CRACD1                        | transcripti | nucleoplas   | chromatin  |
| GI_21264349-I | 115.3  | 122.8  | 108.1 SMARCD1   | <a href="#">NM_003076.3</a> | BAF60A;CRACD1                        | transcripti | nucleoplas   | chromatin  |
| GI_21264350-S | 1370.5 | 1414   | 1557.3 SMARCD2  | <a href="#">NM_003077.2</a> | BAF60B;CRACD2;PRO2451                | transcripti | nucleoplas   | chromatin  |
| GI_21264352-S | 457.9  | 704.4  | 378 SMARCD3     | <a href="#">NM_003078.2</a> | BAF60C;CRACD3                        | transcripti | nucleoplas   | chromatin  |
| GI_21264354-S | 1520.9 | 1821   | 1761.7 SMARCE1  | <a href="#">NM_003079.3</a> | BAF57                                | chromatin   | nuclear      | nucleoso   |
| GI_21264356-I | 188    | 212    | 185.4 MASP1     | <a href="#">NM_001879.3</a> | MASP;RaRF;CRARF;PRSS5;CRARF1         | serine-     |              | compleme   |
| GI_21264358-A | 103.6  | 104.6  | 90.4 MASP1      | <a href="#">NM_139125.1</a> | MASP;RaRF;CRARF;PRSS5;CRARF1         | serine-     |              | compleme   |
| GI_21264358-I | 143.8  | 144.4  | 129.3 MASP1     | <a href="#">NM_139125.1</a> | MASP;RaRF;CRARF;PRSS5;CRARF1         | serine-     |              | compleme   |
| GI_21264360-A | 80.1   | 87     | 71.7 MASP2      | <a href="#">NM_139208.1</a> | sMAP;MAP19                           | serine-     |              | compleme   |
| GI_21264360-I | 187.8  | 253.3  | 193.5 MASP2     | <a href="#">NM_139208.1</a> | sMAP;MAP19                           | serine-     |              | compleme   |
| GI_21264362-I | 111.9  | 119.1  | 110.9 MASP2     | <a href="#">NM_006610.2</a> | sMAP;MAP19                           | serine-     |              | compleme   |
| GI_21264368-A | 318.2  | 341.1  | 340.6 NUP98     | <a href="#">NM_139131.1</a> | ADIR2;NUP196                         | transporte  | nuclear      | protein-   |
| GI_21264368-I | 536.3  | 533    | 513.4 NUP98     | <a href="#">NM_139131.1</a> | ADIR2;NUP196                         | transporte  | nuclear      | protein-   |
| GI_21264372-S | 142.3  | 195    | 144.6 UPK1A     | <a href="#">NM_007000.2</a> | UPIA;UPKA;MGC14388                   |             |              |            |
| GI_21264373-S | 102.7  | 97.8   | 96.6 UPK1B      | <a href="#">NM_006952.2</a> | UPIB;UPK1                            | structural  | integral to  | physiologi |
| GI_21264557-S | 1146.1 | 1096.8 | 661.8 SMAP1     | <a href="#">NM_021940.2</a> | SMAP-1;FLJ13159                      |             |              |            |
| GI_21264564-I | 151.7  | 167.1  | 153 ARID1A      | <a href="#">NM_006015.3</a> | B120;P270;BM029;BAF250;C1orf4;SMARCF |             |              |            |
| GI_21264566-S | 88     | 108.1  | 94 HIST1H3E     | <a href="#">NM_003532.2</a> | H3.1;H3/d;H3FD                       |             |              |            |
| GI_21264567-S | 173.3  | 194.3  | 182.2 TM4SF12   | <a href="#">NM_012338.2</a> | NET-2                                |             | integral to  |            |
| GI_21264568-A | 878    | 712.7  | 702.3 ARID1A    | <a href="#">NM_018450.4</a> | B120;P270;BM029;BAF250;C1orf4;SMARCF |             |              |            |
| GI_21264570-S | 104.7  | 107.2  | 102.6 HIST1H3G  | <a href="#">NM_003534.2</a> | H3/h;H3FH                            |             |              |            |
| GI_21264571-S | 90.5   | 95.5   | 92.2 HIST1H1A   | <a href="#">NM_005325.2</a> | H1.1;H1F1;HIST1                      | DNA         | chromoso     | spermatog  |
| GI_21264572-S | 285.5  | 349    | 306.7 NET-5     | <a href="#">NM_006675.2</a> |                                      |             | membran      |            |
| GI_21264573-S | 122.2  | 139.8  | 132.2 TM4SF13   | <a href="#">NM_014399.2</a> | NET-6;FLJ22934                       |             | membran      |            |
| GI_21264576-S | 91.3   | 105.5  | 108.2 NET-7     | <a href="#">NM_012339.2</a> |                                      |             | membran      |            |
| GI_21264577-S | 186.4  | 365.3  | 378.8 TSPAN-1   | <a href="#">NM_005727.2</a> | NET-1                                |             | integral to  | mystery    |
| GI_21264579-S | 83.5   | 99.4   | 101.7 TSPAN-2   | <a href="#">NM_005725.2</a> | FLJ12082                             |             | integral to  | mystery    |
| GI_21264582-S | 445.7  | 418.1  | 290 TM4SF9      | <a href="#">NM_005723.2</a> | NET-4;TSPAN-5                        |             | integral to  | mystery    |



|               |        |        |        |          |                             |                                    |            |             |              |
|---------------|--------|--------|--------|----------|-----------------------------|------------------------------------|------------|-------------|--------------|
| GI_21264584-I | 108.3  | 94.8   | 91.6   | HOP      | <a href="#">NM_032495.3</a> | OB1;LAGY;Toto;Cameo;NECC1;SMAP31   |            |             |              |
| GI_21264586-A | 91.7   | 89     | 77.3   | HOP      | <a href="#">NM_139211.1</a> | OB1;LAGY;Toto;Cameo;NECC1;SMAP31   |            |             |              |
| GI_21264590-S | 232.8  | 168.6  | 188.4  | CENPH    | <a href="#">NM_022909.3</a> |                                    | molecular  | kinetochor  | centromer    |
| GI_21264591-I | 95.8   | 114.6  | 103.9  | CENTD1   | <a href="#">NM_015230.2</a> | ARAP2;FLJ13675;KIAA0580            |            |             |              |
| GI_21264593-A | 114.1  | 112.3  | 116.6  | CENTD1   | <a href="#">NM_139182.1</a> | ARAP2;FLJ13675;KIAA0580            |            |             |              |
| GI_21264593-I | 85.1   | 88.9   | 81.2   | CENTD1   | <a href="#">NM_139182.1</a> | ARAP2;FLJ13675;KIAA0580            |            |             |              |
| GI_21264595-A | 326    | 315.8  | 313.4  | CENTD2   | <a href="#">NM_015242.2</a> | ARAP1;KIAA0782                     | DNA        | nucleus     | neuropepti   |
| GI_21264595-I | 106.8  | 118.7  | 106.1  | CENTD2   | <a href="#">NM_015242.2</a> | ARAP1;KIAA0782                     | DNA        | nucleus     | neuropepti   |
| GI_21264596-I | 106.3  | 112.1  | 105.6  | CENTD2   | <a href="#">NM_139181.1</a> | ARAP1;KIAA0782                     | DNA        | nucleus     | neuropepti   |
| GI_21264599-S | 140.1  | 205.4  | 134.9  | HIST1H4H | <a href="#">NM_003543.3</a> | H4/h;H4FH                          |            |             |              |
| GI_21264600-S | 81.5   | 106.1  | 80.6   | HIST1H4E | <a href="#">NM_003545.3</a> | H4/j;H4FJ                          |            |             |              |
| GI_21264601-S | 5743.5 | 826    | 555.5  | LAMA5    | <a href="#">NM_005560.3</a> | KIAA1907                           | structural | basal       |              |
| GI_21264603-S | 1326.5 | 649    | 277.4  | LOX      | <a href="#">NM_002317.3</a> |                                    | protein-   | extracellul | protein      |
| GI_21264605-I | 98.8   | 133.4  | 108.6  | EPS8L1   | <a href="#">NM_017729.2</a> | DRC3;EPS8R1;MGC4642;FLJ20258;MGC23 |            |             |              |
| GI_21264607-I | 112    | 110.3  | 104    | EPS8L1   | <a href="#">NM_133180.1</a> | DRC3;EPS8R1;MGC4642;FLJ20258;MGC23 |            |             |              |
| GI_21264609-A | 258.2  | 320.1  | 318.7  | EPS8L1   | <a href="#">NM_139204.1</a> | DRC3;EPS8R1;MGC4642;FLJ20258;MGC23 |            |             |              |
| GI_21264609-I | 112.5  | 105.5  | 100.7  | EPS8L1   | <a href="#">NM_139204.1</a> | DRC3;EPS8R1;MGC4642;FLJ20258;MGC23 |            |             |              |
| GI_21264611-I | 143.3  | 155.6  | 151.8  | ST5      | <a href="#">NM_005418.2</a> | P70;P82;HTS1;P126                  | tumor      |             |              |
| GI_21264613-A | 439.3  | 750.2  | 412.3  | ST5      | <a href="#">NM_139157.1</a> | P70;P82;HTS1;P126                  | tumor      |             |              |
| GI_21264615-S | 700.9  | 750.8  | 532.3  | EPS8L2   | <a href="#">NM_022772.2</a> | EPS8R2;MGC3088;FLJ21935;FLJ22171   |            |             |              |
| GI_21264629-S | 104    | 121.7  | 114.7  | ST14     | <a href="#">NM_021978.2</a> | HAI;MTSP1;SNC19;MT-SP1;MTSP-       | serine-    | integral to | proteolysis  |
| GI_21265024-S | 107.1  | 123.4  | 104.9  | ADAMTS10 | <a href="#">NM_030957.1</a> | ADAM-TS10                          | zinc ion   | extracellul | proteolysis  |
| GI_21265027-S | 434.5  | 583.5  | 759.5  | STAM     | <a href="#">NM_003473.2</a> | STAM1                              | SH3/SH2    |             | signal       |
| GI_21265030-S | 109    | 102.4  | 100.5  | STAM2    | <a href="#">NM_005843.3</a> | Hbp;STAM2A;STAM2B;DKFZP564C047     |            |             | intracellula |
| GI_21265033-I | 241.5  | 243.3  | 237.5  | ADAMTS13 | <a href="#">NM_139025.1</a> | TTP;VWF;C9orf8;vWF-                |            |             |              |
| GI_21265036-S | 101.6  | 127.4  | 105.7  | ADAMTS3  | <a href="#">NM_014243.1</a> | ADAMTS-4;KIAA0366                  | heparin    | extracellul | collagen     |
| GI_21265039-S | 2254.7 | 1996.6 | 1981.8 | MRPL22   | <a href="#">NM_014180.2</a> | RPML25;HSPC158;MRP-L25             |            |             |              |
| GI_21265048-A | 126.5  | 151.3  | 128.5  | ADAMTS13 | <a href="#">NM_139028.1</a> | TTP;VWF;C9orf8;vWF-                |            |             |              |
| GI_21265048-I | 158.8  | 195.8  | 178.9  | ADAMTS13 | <a href="#">NM_139028.1</a> | TTP;VWF;C9orf8;vWF-                |            |             |              |
| GI_21265051-A | 106.9  | 106.5  | 101    | ADAMTS14 | <a href="#">NM_080722.2</a> |                                    | metalloen  | extracellul | collagen     |
| GI_21265057-S | 87.1   | 97.3   | 80.1   | ADAMTS15 | <a href="#">NM_139055.1</a> |                                    | zinc ion   | extracellul | integrin-    |
| GI_21265060-S | 102.2  | 120.2  | 104.2  | ADAMTS16 | <a href="#">NM_139056.1</a> |                                    | peptidase  | extracellul | integrin-    |
| GI_21265063-S | 149    | 147.7  | 148.1  | ADAMTS17 | <a href="#">NM_139057.1</a> | FLJ32769                           | zinc ion   | extracellul | integrin-    |
| GI_21265074-S | 842.8  | 902.3  | 800.8  | MRPL14   | <a href="#">NM_032111.1</a> | RMPL32;RPML32;MRP-L32              | structural | ribosome    | protein      |
| GI_21265077-S | 3747.5 | 3399.6 | 4217.5 | MRPL15   | <a href="#">NM_014175.2</a> | RPML7;MRP-L7;HSPC145               | structural | large       | protein      |
| GI_21265079-S | 1134   | 1236.2 | 763.1  | MRPL18   | <a href="#">NM_014161.2</a> | HSPC071;MRP-L18                    | structural | mitochond   |              |
| GI_21265083-S | 1232.7 | 1201.9 | 1105.5 | MRPL1    | <a href="#">NM_020236.2</a> | L1mt;BM022                         |            |             |              |
| GI_21265087-S | 1130.3 | 1417.4 | 1396.5 | MRPL36   | <a href="#">NM_032479.2</a> | RPMJ;BRIP1;L36mt;PRPL36            | structural | ribosome    | protein      |
| GI_21265090-S | 5721.4 | 5303.2 | 4240.2 | MRPL3    | <a href="#">NM_007208.2</a> | MRL3;RPML3                         | structural | cytosolic   | protein      |
| GI_21265092-S | 899.1  | 1106.2 | 1309.6 | MRPL41   | <a href="#">NM_032477.1</a> | RPML27;MRP-L27                     | structural |             |              |
| GI_21265095-S | 951    | 1119.3 | 1124.4 | MRPL50   | <a href="#">NM_019051.1</a> | MRP-L50;FLJ20493                   | structural | mitochond   |              |
| GI_21265098-S | 119.5  | 117.6  | 107.8  | TM4-B    | <a href="#">NM_012466.2</a> |                                    |            | integral to |              |
| GI_21265100-S | 122.5  | 161.5  | 121.4  | TM4SF1   | <a href="#">NM_014220.1</a> | L6;H-L6;M3S1;TAAL6                 | molecular  | integral to | N-linked     |
| GI_21265103-S | 127.4  | 138.2  | 121.6  | TM4SF2   | <a href="#">NM_004615.2</a> | A15;MXS1;CD231;CCG-B7;TALLA-       |            | integral to | N-linked     |

|               |        |        |        |          |                             |                                      |             |             |              |
|---------------|--------|--------|--------|----------|-----------------------------|--------------------------------------|-------------|-------------|--------------|
| GI_21265107-S | 113    | 107.4  | 91.9   | TM4SF3   | <a href="#">NM_004616.2</a> | CO-029                               | signal      | membran     | pathogene    |
| GI_21265109-S | 148.8  | 148.5  | 137    | TM4SF4   | <a href="#">NM_004617.2</a> | ILTMP;il-TMP;FLJ31015                |             | membran     | negative     |
| GI_21265112-S | 107.6  | 100    | 106.9  | TM4SF5   | <a href="#">NM_003963.2</a> |                                      | tumor       | integral to | N-linked     |
| GI_21265115-S | 545    | 605.2  | 454.4  | TM4SF6   | <a href="#">NM_003270.2</a> | T245;TSPAN-6                         | cell        | integral to | cell         |
| GI_21265128-A | 332.9  | 348.1  | 376.6  | USP21    | <a href="#">NM_016572.2</a> | USP16;USP23;MGC3394                  | cysteine-   | cellular_co | ubiquitin-   |
| GI_21269863-S | 613.3  | 899.2  | 811.1  | TAF11    | <a href="#">NM_005643.2</a> | TAF2I;PRO2134;TAFII28;MGC:15243      | protein     | transcripti |              |
| GI_21269865-S | 346.3  | 323.7  | 270.2  | TAF5L    | <a href="#">NM_014409.2</a> | PAF65B                               | transcripti |             | transcripti  |
| GI_21269867-S | 626.7  | 776.8  | 873.1  | TAF6L    | <a href="#">NM_006473.2</a> | PAF65A;MGC4288;FLJ11136              | DNA         | histone     | chromatin    |
| GI_21269869-I | 176.6  | 171.3  | 212.9  | ACAS2    | <a href="#">NM_018677.2</a> | ACS;ACSA;AceCS;dJ1161H23.1           | acetate-    | cytoplasm   | metabolis    |
| GI_21269871-A | 2273   | 1482.1 | 2767.2 | ACAS2    | <a href="#">NM_139274.1</a> | ACS;ACSA;AceCS;dJ1161H23.1           | acetate-    | cytoplasm   | metabolis    |
| GI_21269871-I | 119.8  | 120.8  | 117.5  | ACAS2    | <a href="#">NM_139274.1</a> | ACS;ACSA;AceCS;dJ1161H23.1           | acetate-    | cytoplasm   | metabolis    |
| GI_21269874-A | 7248.1 | 5890.9 | 4893.7 | CARS     | <a href="#">NM_001751.3</a> | CYSRS;MGC:11246                      | tRNA        | soluble     | protein      |
| GI_21281666-S | 760.8  | 566.5  | 455.4  | C7orf36  | <a href="#">NM_020192.1</a> | GK003                                |             |             |              |
| GI_21281668-S | 138.2  | 153.3  | 152.8  | BDP1     | <a href="#">NM_018429.1</a> | TFC5;TFNR;TAF3B1;KIAA1241;KIAA1689;T |             |             |              |
| GI_21281672-S | 89.5   | 82.4   | 86.9   | LGI4     | <a href="#">NM_139284.1</a> | LGIL3                                |             |             |              |
| GI_21281674-S | 108.3  | 130.5  | 107.5  | GAR17    | <a href="#">NM_139285.1</a> |                                      |             |             |              |
| GI_21281676-S | 229.7  | 248.9  | 228.2  | WDR36    | <a href="#">NM_139281.1</a> | TA-WDRP                              | catalytic   |             | metabolis    |
| GI_21281678-S | 209.5  | 190.1  | 178.7  | TA-PP2C  | <a href="#">NM_139283.1</a> |                                      | catalytic   |             |              |
| GI_21281684-S | 1653.1 | 1346.5 | 1282.7 | LAGE2A   | <a href="#">NM_139250.1</a> |                                      |             |             |              |
| GI_21281688-S | 90.3   | 108.8  | 88.8   | FLJ12056 | <a href="#">NM_024933.1</a> |                                      |             |             |              |
| GI_21284382-I | 229.5  | 251.6  | 229.6  | ABLIM1   | <a href="#">NM_002313.4</a> | abLIM;LIMAB1;LIMATIN;KIAA0059        | actin       | actin       | vision       |
| GI_21284386-A | 113.4  | 117.7  | 121.2  | ABLIM1   | <a href="#">NM_006720.2</a> | abLIM;LIMAB1;LIMATIN;KIAA0059        | actin       | actin       | vision       |
| GI_21284386-I | 98     | 115    | 100.7  | ABLIM1   | <a href="#">NM_006720.2</a> | abLIM;LIMAB1;LIMATIN;KIAA0059        | actin       | actin       | vision       |
| GI_21312133-S | 430.7  | 559.4  | 490.4  | PCQAP    | <a href="#">NM_015889.2</a> | TIG1;CAG7A;TIG-                      | transcripti |             | neurogene    |
| GI_21312135-S | 107.5  | 121.4  | 114.8  | CHST6    | <a href="#">NM_021615.2</a> | MCDC1                                | transferas  | Golgi       | proteoglyc   |
| GI_21313637-S | 170.9  | 170.1  | 155.9  | LGI2     | <a href="#">NM_018176.2</a> | LGIL2;FLJ10675;KIAA1916              |             |             |              |
| GI_21314599-S | 261.2  | 315.7  | 254.3  | CEACAM8  | <a href="#">NM_001816.2</a> | CD67;CGM6;CD66b;NCA-95               | tumor       | extracellul | immune       |
| GI_21314612-S | 5405.7 | 4809.2 | 3600.1 | EIF2S3   | <a href="#">NM_001415.2</a> | EIF2;EIF2G;EIF2gamma                 | GTPase      | cytosolic   | translation  |
| GI_21314613-S | 168.3  | 210    | 186.8  | CD4      | <a href="#">NM_000616.2</a> |                                      | internaliza | integral to | enzyme       |
| GI_21314616-S | 206.1  | 363.5  | 205.5  | PECAM1   | <a href="#">NM_000442.2</a> | CD31                                 | cell        | proteoglyc  | cell         |
| GI_21314620-S | 263.6  | 311.9  | 243.6  | RNASE6   | <a href="#">NM_005615.2</a> | RNS6;RNASEK6;RNase k6                | ribonuclea  | secretory   | RNA          |
| GI_21314621-S | 110.2  | 100.9  | 99.2   | GPR34    | <a href="#">NM_005300.2</a> | GPCR                                 | G-protein   | integral to | G-protein    |
| GI_21314623-S | 766.6  | 848.2  | 831.9  | PGS1     | <a href="#">NM_024419.2</a> | DKFZP762M186                         |             |             |              |
| GI_21314628-S | 108.5  | 109.5  | 101.7  | RAB27B   | <a href="#">NM_004163.3</a> |                                      | RAB small   |             | protein      |
| GI_21314629-S | 246.3  | 302.5  | 224.6  | C3AR1    | <a href="#">NM_004054.2</a> | AZ3B;C3AR;HNFAG09                    | compleme    | integral to | phosphati    |
| GI_21314630-S | 94.2   | 192.5  | 99.3   | GNG4     | <a href="#">NM_004485.2</a> |                                      | heterotrim  | peripheral  | regulation   |
| GI_21314631-S | 503    | 362.8  | 225.5  | SLC1A4   | <a href="#">NM_003038.2</a> | SATT;ASCT1                           | neutral     | membran     | neutral      |
| GI_21314634-S | 156.1  | 154.4  | 153.5  | PSG9     | <a href="#">NM_002784.2</a> | PSG11                                | plasma      | extracellul | pregnancy    |
| GI_21314637-S | 229.1  | 273.5  | 237.8  | NEUROD2  | <a href="#">NM_006160.2</a> | NDRF                                 | transcripti | nucleus     | regulation   |
| GI_21314639-S | 5126.8 | 4668.7 | 3340.2 | SRPX     | <a href="#">NM_006307.2</a> | ETX1                                 | cell        | membran     | cell         |
| GI_21314640-S | 313.5  | 406.4  | 362    | LILRB4   | <a href="#">NM_006847.2</a> | HM18;ILT3;LIR5;CD85K;LIR-5           | antigen     | plasma      | defense      |
| GI_21314642-S | 397.8  | 597.3  | 472.6  | MFAP3    | <a href="#">NM_005927.3</a> |                                      | extracellul | extracellul |              |
| GI_21314643-S | 218.3  | 242.1  | 206.7  | FRS2     | <a href="#">NM_006654.2</a> | SNT;SNT1;FRS2A;SNT-1;FRS2alpha       | insulin     | peripheral  | FGF          |
| GI_21314646-S | 1631.4 | 2447.5 | 2078   | RNP24    | <a href="#">NM_006815.2</a> | P24A                                 | protein     | microsom    | intracellula |

|               |         |        |        |            |                             |                                     |             |             |             |
|---------------|---------|--------|--------|------------|-----------------------------|-------------------------------------|-------------|-------------|-------------|
| GI_21314647-S | 133.1   | 166.3  | 142.2  | CMRF35     | <a href="#">NM_006678.2</a> | LIR;CMRF35A;CMRF-35A;CMRF35A1       | lymphocyt   | integral to | cellular    |
| GI_21314649-S | 93.9    | 98.6   | 104.3  | PPP1R1A    | <a href="#">NM_006741.2</a> |                                     | type 1      |             | glycogen    |
| GI_21314652-S | 100     | 112    | 101.7  | PLA2G2D    | <a href="#">NM_012400.2</a> | SPLASH;sPLA2S                       | secreted    | extracellul | phospholi   |
| GI_21314657-S | 699.3   | 674.5  | 594.6  | PGCP       | <a href="#">NM_016134.2</a> |                                     | metallocar  | extracellul | peptide     |
| GI_21314659-S | 560.9   | 542.4  | 557.6  | NCB5OR     | <a href="#">NM_016230.2</a> | b5+b5R;dJ676J13.1                   | cytochrom   | cytoplasm   | chemosen    |
| GI_21314660-S | 130.1   | 146.5  | 131.8  | RND1       | <a href="#">NM_014470.2</a> | ARHS;RHO6                           | Rho small   | cytoskelet  | negative    |
| GI_21314665-S | 322.5   | 302.2  | 279.6  | LSM8       | <a href="#">NM_016200.2</a> | YJR022W                             | pre-mRNA    | small       | mRNA        |
| GI_21314666-S | 2868.9  | 2581.4 | 2745.2 | CPSF3      | <a href="#">NM_016207.2</a> | CPSF;CPSF73                         | RNA         | nucleoplas  | mRNA        |
| GI_21314667-S | 113.2   | 103.2  | 96.8   | APLN       | <a href="#">NM_017413.2</a> |                                     | receptor    |             | lactation   |
| GI_21314670-S | 446.9   | 410.9  | 367.3  | TRPM4      | <a href="#">NM_017636.2</a> | TRPM4B;FLJ20041                     | cation      | integral to | cation      |
| GI_21314672-S | 121.8   | 122.5  | 116.6  | CLST11240  | <a href="#">NM_016438.2</a> | CLST11240-15                        |             |             |             |
| GI_21314673-S | 10296.1 | 10625  | 4677.3 | MIG-6      | <a href="#">NM_018948.2</a> | MIG6;RALT;GENE-33                   | Rho         | cytoplasm   | response    |
| GI_21314674-S | 312.3   | 317.6  | 432.8  | DKFZp434G0 | <a href="#">NM_017566.2</a> |                                     |             |             |             |
| GI_21314678-S | 118.1   | 114.7  | 104.2  | SHC3       | <a href="#">NM_016848.2</a> | NSHC;SHCC;N-Shc                     | signal      | nucleus     | transmem    |
| GI_21314680-S | 499.3   | 325.4  | 911.4  | KIAA1598   | <a href="#">NM_018330.2</a> | FLJ11122                            |             |             |             |
| GI_21314681-S | 150.8   | 161.8  | 152.7  | TRPV6      | <a href="#">NM_018646.2</a> | CAT1;CATL;ZFAB;ECAC2;ABP/ZF;HSA2779 |             |             |             |
| GI_21314683-A | 235.9   | 272.9  | 229.6  | SSBP3      | <a href="#">NM_018070.2</a> | SSDP;SSDP1;SSDP3;FLJ10355           | single-     | nucleus     | regulation  |
| GI_21314683-I | 108.7   | 121    | 105.2  | SSBP3      | <a href="#">NM_018070.2</a> | SSDP;SSDP1;SSDP3;FLJ10355           | single-     | nucleus     | regulation  |
| GI_21314689-S | 1550.7  | 1259.5 | 1020.8 | NGLY1      | <a href="#">NM_018297.2</a> | PNG1;FLJ11005                       |             |             |             |
| GI_21314691-S | 117     | 122.3  | 107.6  | HRMT1L3    | <a href="#">NM_019854.2</a> |                                     |             |             |             |
| GI_21314694-S | 802.3   | 798.4  | 823.9  | KIAA1449   | <a href="#">NM_020839.2</a> | P80                                 |             |             |             |
| GI_21314699-S | 177.3   | 627.7  | 341.5  | FLJ12541   | <a href="#">NM_022369.2</a> | Stra6                               |             |             |             |
| GI_21314703-S | 90.5    | 80     | 77.8   | GMCL       | <a href="#">NM_022471.2</a> | GCL                                 | protein     |             |             |
| GI_21314708-S | 99.3    | 87.2   | 74.2   | ZNFN1A5    | <a href="#">NM_022466.2</a> | PEGASUS;FLJ22973                    |             |             |             |
| GI_21314710-S | 235.2   | 273.8  | 245.2  | MGC3020    | <a href="#">NM_024048.2</a> |                                     |             |             |             |
| GI_21314717-S | 286     | 320.7  | 333.9  | ZBTB3      | <a href="#">NM_024784.2</a> | FLJ23392                            | protein     | nucleus     | regulation  |
| GI_21314718-S | 95.3    | 103.5  | 107.3  | FLJ11767   | <a href="#">NM_024593.2</a> |                                     | calcium     |             |             |
| GI_21314719-S | 478.8   | 563    | 562.4  | SNIP1      | <a href="#">NM_024700.2</a> | FLJ12553                            | DNA         | nucleus     | regulation  |
| GI_21314723-S | 714.7   | 582.7  | 556.3  | FLJ22490   | <a href="#">NM_024790.2</a> |                                     |             |             |             |
| GI_21314727-S | 307.3   | 325.7  | 305.3  | C18orf9    | <a href="#">NM_024899.2</a> | HsT1705;FLJ12542                    |             |             |             |
| GI_21314730-S | 248.8   | 244.6  | 211    | MGC2776    | <a href="#">NM_025265.2</a> | MGC4440                             | tRNA-       | tRNA-       | tRNA        |
| GI_21314735-S | 99.1    | 113.6  | 101.9  | LOC80298   | <a href="#">NM_025198.2</a> | FLJ14062                            |             |             |             |
| GI_21314737-S | 127     | 181.5  | 140.8  | LOC83468   | <a href="#">NM_031302.2</a> |                                     | transferas  |             | carbohydr   |
| GI_21314738-S | 176.7   | 166.6  | 157.5  | MFTC       | <a href="#">NM_030780.2</a> |                                     | folate      | mitochond   | folate      |
| GI_21314740-S | 98.9    | 93.7   | 96.3   | LOC83690   | <a href="#">NM_031461.2</a> |                                     |             | extracellul |             |
| GI_21314741-S | 350.5   | 283.4  | 311.3  | DKFZP434G2 | <a href="#">NM_031217.2</a> |                                     | ATP         | kinesin     | microtubul  |
| GI_21314743-S | 97.7    | 97.9   | 100.5  | STK22D     | <a href="#">NM_032028.2</a> | TSSK1;FKSG81;SPOGA4                 | protein-    |             | protein     |
| GI_21314751-S | 173.9   | 202.7  | 180.8  | GPR81      | <a href="#">NM_032554.2</a> | FKSG80                              | receptor    | integral to | G-protein   |
| GI_21314754-S | 564     | 929.6  | 911.8  | SPPL2A     | <a href="#">NM_032802.2</a> | IMP3;PSL2;FLJ14540                  | peptidase   | integral to | proteolysis |
| GI_21314756-S | 1042.7  | 1005.4 | 944.8  | C14orf142  | <a href="#">NM_032490.2</a> | PNAS-127                            |             |             |             |
| GI_21314757-S | 166.6   | 290    | 177.9  | HAVCR2     | <a href="#">NM_032782.2</a> | TIM3;KIM-3;TIMD3;Tim-3;FLJ14428     |             |             |             |
| GI_21314759-S | 698.8   | 757    | 777.4  | ZNF499     | <a href="#">NM_032792.2</a> | FLJ14486                            | protein     |             |             |
| GI_21314760-S | 493.4   | 557.1  | 649.6  | SLC35B4    | <a href="#">NM_032826.2</a> | YEA;YEA4;FLJ14697                   | nucleotide- | integral to | nucleotide- |
| GI_21314761-S | 311.2   | 366.7  | 260.8  | MCEE       | <a href="#">NM_032601.2</a> |                                     |             |             |             |

|               |         |        |        |           |                             |                                      |             |              |             |
|---------------|---------|--------|--------|-----------|-----------------------------|--------------------------------------|-------------|--------------|-------------|
| GI_21314763-S | 252.8   | 314.7  | 254.8  | FCRH3     | <a href="#">NM_052939.2</a> | SPAP2                                |             |              |             |
| GI_21314766-S | 356.2   | 365.8  | 332.9  | MADP-1    | <a href="#">NM_033114.2</a> |                                      | nucleic     |              |             |
| GI_21314771-S | 8019.6  | 8954.3 | 7215.9 | ESDN      | <a href="#">NM_080927.2</a> | CLCP1                                |             |              |             |
| GI_21314777-S | 448.5   | 586.3  | 508.5  | CSNK1G2   | <a href="#">NM_001319.5</a> | CK1g2                                | casein      |              | protein     |
| GI_21314780-S | 130.8   | 152.1  | 136    | NEURL     | <a href="#">NM_004210.3</a> | RNF67;h-neu                          | tumor       |              | neurogene   |
| GI_21314782-S | 127.7   | 125.8  | 127    | LOC130951 | <a href="#">NM_138804.2</a> |                                      |             |              |             |
| GI_21314788-S | 443.7   | 635    | 464.7  | TWSG1     | <a href="#">NM_020648.3</a> | TSG                                  | protein     |              | embryonic   |
| GI_21322233-S | 98.8    | 85     | 86     | SLC17A8   | <a href="#">NM_139319.1</a> | VGLUT3                               | transporte  | membran      | transport   |
| GI_21322251-S | 217.3   | 279.5  | 240.8  | AR        | <a href="#">NM_000044.2</a> | KD;AIS;TFM;DHTR;SBMA;NR3C4;SMAX1;H   | androgen    | nucleus      | sex         |
| GI_21327676-S | 1283.4  | 1754.2 | 556.5  | HLA-B     | <a href="#">NM_005514.4</a> |                                      | MHC         | integral to  | immune      |
| GI_21327678-S | 10114.2 | 11568  | 12861  | ATP5E     | <a href="#">NM_006886.2</a> | ATPE                                 | hydrogen    | proton-      | proton      |
| GI_21327679-S | 122.7   | 163.1  | 131.5  | ASIP      | <a href="#">NM_001672.2</a> | ASP;AGSW;AGTI;AGTIL                  | receptor    | extracellul  | energy      |
| GI_21327681-S | 2090.7  | 1922.1 | 2166.1 | ACADM     | <a href="#">NM_000016.2</a> | MCAD;ACAD1;MCADH                     | acyl-CoA    | mitochond    | fatty acid  |
| GI_21327682-S | 2160    | 2283.5 | 1967.9 | CINP      | <a href="#">NM_032630.2</a> | MGC849                               | kinase      |              |             |
| GI_21327686-A | 944.1   | 1173   | 829.8  | YME1L1    | <a href="#">NM_139313.1</a> | FTSH;MEG4;PAMP;YME1L                 |             |              |             |
| GI_21327689-S | 1611.4  | 1669.7 | 1617.3 | SART3     | <a href="#">NM_014706.2</a> | TIP110;KIAA0156;p110(nrb);RP11-13G14 | nucleic     | intracellula | RNA         |
| GI_21327690-A | 115.9   | 124    | 126.4  | ADAMTSL1  | <a href="#">NM_052866.2</a> | ADAMTSR1;MGC40193                    |             |              | extracellul |
| GI_21327690-I | 98.4    | 105.6  | 89.2   | ADAMTSL1  | <a href="#">NM_052866.2</a> | ADAMTSR1;MGC40193                    |             |              | extracellul |
| GI_21327692-I | 192.5   | 206.1  | 197.4  | ADAMTSL1  | <a href="#">NM_139238.1</a> | ADAMTSR1;MGC40193                    |             |              | extracellul |
| GI_21327694-I | 119.9   | 134.7  | 122.6  | ADAMTSL1  | <a href="#">NM_139264.1</a> | ADAMTSR1;MGC40193                    |             |              | extracellul |
| GI_21327696-S | 115.6   | 132.6  | 121.2  | DDX25     | <a href="#">NM_013264.2</a> | GRTH                                 | translation | cytoplasm    | regulation  |
| GI_21327698-S | 96.7    | 106.7  | 98.9   | TAF13     | <a href="#">NM_005645.2</a> | TAF2K;TAFII18;MGC22425               | protein     | transcripti  | transcripti |
| GI_21327700-A | 1274.6  | 1507.4 | 1189.2 | TAF15     | <a href="#">NM_139215.1</a> | RBP56;TAF2N;TAFII68;hTAFII68         | single-     | transcripti  | cell growth |
| GI_21327702-S | 160.2   | 236    | 170.4  | KLK6      | <a href="#">NM_002774.2</a> | Bssp;Klk7;SP59;PRSS9;PRSS18;MGC9355; | serine-     | extracellul  | pathogene   |
| GI_21327704-A | 102.6   | 117.7  | 113.8  | KLK7      | <a href="#">NM_139277.1</a> | SCCE;PRSS6                           | serine-     |              | epidermal   |
| GI_21327706-A | 4227.3  | 3626.5 | 3092.6 | NAP1L1    | <a href="#">NM_004537.3</a> | NRP;NAP1;NAP1L;MGC8688;MGC23410      |             | chromatin    | nucleoso    |
| GI_21327707-I | 4034.4  | 3935.9 | 3346.7 | NAP1L1    | <a href="#">NM_139207.1</a> | NRP;NAP1;NAP1L;MGC8688;MGC23410      |             | chromatin    | nucleoso    |
| GI_21327711-S | 2372.9  | 2564.1 | 2284.1 | NAP1L4    | <a href="#">NM_005969.2</a> | NAP2;NAP2L;hNAP2;MGC4565             | chaperone   | chromatin    | nucleoso    |
| GI_21327712-S | 2464.6  | 7971.9 | 7095.8 | PRSS11    | <a href="#">NM_002775.2</a> | L56;HtrA;HTRA1;ORF480                | serine-     | extracellul  | cell growth |
| GI_21327713-S | 100.9   | 114    | 102.4  | PRSS12    | <a href="#">NM_003619.2</a> | BSSP3;BSSP-3;MGC12722;MOTOP SIN      | serine-     | membran      | proteolysis |
| GI_21327714-S | 492.4   | 487.3  | 411.7  | TCERG1    | <a href="#">NM_006706.2</a> | CA150;TAF2S                          | RNA         | nucleus      | transcripti |
| GI_21328445-S | 109.3   | 131.9  | 112    | LIPE      | <a href="#">NM_005357.2</a> | HSL;LHS                              | hydrolase   |              | fatty acid  |
| GI_21328450-A | 98.3    | 102.7  | 98.9   | ANGPT1    | <a href="#">NM_139290.1</a> | AGP1;AGPT;ANG1;KIAA0003              | receptor    | kinesin      | signal      |
| GI_21328450-I | 97.7    | 100.3  | 101.7  | ANGPT1    | <a href="#">NM_139290.1</a> | AGP1;AGPT;ANG1;KIAA0003              | receptor    | kinesin      | signal      |
| GI_21328452-I | 123.4   | 171.1  | 146.3  | ANGPT1    | <a href="#">NM_001146.3</a> | AGP1;AGPT;ANG1;KIAA0003              | receptor    | kinesin      | signal      |
| GI_21328453-S | 100.8   | 106.1  | 97.6   | ANGPT4    | <a href="#">NM_015985.2</a> | AGP4;ANG4;ANG-3                      | molecular   | kinesin      | biological_ |
| GI_21328454-S | 741.9   | 1421   | 1012.4 | HIST2H2AA | <a href="#">NM_003516.2</a> | H2A;H2A.2;H2A/O;H2AFO;H2a-615        | DNA         | chromoso     | nucleoso    |
| GI_21359817-S | 156.3   | 157.4  | 135.9  | SLAC2-B   | <a href="#">NM_015065.1</a> | KIAA0624                             |             |              |             |
| GI_21359821-S | 1346.2  | 1286.2 | 1165.4 | RNASE3L   | <a href="#">NM_013235.2</a> | RN3;DROSHA;HSA242976                 | double-     | nucleus      | ribosome    |
| GI_21359830-S | 124.3   | 108.6  | 108.3  | AMY2A     | <a href="#">NM_000699.2</a> | AMY2                                 | alpha-      | extracellul  | carbohydr   |
| GI_21359835-S | 8130.2  | 6517.2 | 5648.3 | PEA15     | <a href="#">NM_003768.2</a> | PED;MAT1;HMAT1;MAT1H;PEA-            |             |              | small       |
| GI_21359839-S | 1432.5  | 1761.6 | 1516.9 | SNRPG     | <a href="#">NM_003096.2</a> | SMG                                  | small       | spliceoso    | mRNA        |
| GI_21359840-S | 2625.8  | 2851.4 | 2409.6 | TTC3      | <a href="#">NM_003316.2</a> | TPRD;DCRR1;TPRDI;RNF105;TPRDII;TPRD  |             |              | pathogene   |
| GI_21359847-S | 245.3   | 285.1  | 257.4  | HCN2      | <a href="#">NM_001194.2</a> | BCNG2;HAC-1;BCNG-2                   | cation      | voltage-     | cation      |

|               |         |        |        |          |                             |                                        |             |                            |
|---------------|---------|--------|--------|----------|-----------------------------|----------------------------------------|-------------|----------------------------|
| GI_21359849-S | 158.3   | 175.3  | 170.5  | CRMP1    | <a href="#">NM_001313.2</a> | DRP1;DRP-1;DPYSL1                      | dihydropyr  | nucleobas                  |
| GI_21359850-S | 103     | 113.3  | 113.1  | C4BPA    | <a href="#">NM_000715.2</a> | C4BP                                   | extracellul | compleme                   |
| GI_21359853-S | 890.3   | 806.6  | 580.4  | RABGGTB  | <a href="#">NM_004582.2</a> | GGTB                                   | prenyltran  | vision                     |
| GI_21359858-S | 102.7   | 105.6  | 101.4  | LUM      | <a href="#">NM_002345.2</a> | LDC;SLRR2D                             | proteoglyc  | extracellul<br>cartilage   |
| GI_21359859-S | 6321.8  | 6818.9 | 5184.8 | PTMA     | <a href="#">NM_002823.2</a> | TMSA                                   | nucleus     | transcripti                |
| GI_21359861-S | 124.9   | 130.7  | 106.6  | EDN1     | <a href="#">NM_001955.2</a> | ET1                                    | peptide     | soluble<br>positive        |
| GI_21359863-S | 131.2   | 122.5  | 108.4  | HTN1     | <a href="#">NM_002159.2</a> | HIS1                                   | antifungal  | extracellul<br>ossificatio |
| GI_21359866-S | 5901    | 6026.1 | 5934.7 | CYC1     | <a href="#">NM_001916.2</a> |                                        | cytochrom   | mitochond<br>electron      |
| GI_21359870-S | 104.4   | 94.9   | 96.5   | SPARCL1  | <a href="#">NM_004684.2</a> | SC1;HEVIN;MAST9                        | calcium     | extracellul                |
| GI_21359876-S | 971.6   | 870    | 699.2  | GGPS1    | <a href="#">NM_004837.2</a> | GGPPS;GGPPS1                           | geranyltra  | lipid                      |
| GI_21359880-S | 399.3   | 504.8  | 421.8  | ZNF193   | <a href="#">NM_006299.2</a> | PRD51                                  | protein     | nucleus<br>regulation      |
| GI_21359891-S | 3537    | 4207.5 | 3745.4 | MKRN1    | <a href="#">NM_013446.2</a> | RNF61                                  | nucleic     | cellular_co<br>biological_ |
| GI_21359892-S | 1735.4  | 1031.6 | 867.7  | TIMM9    | <a href="#">NM_012460.2</a> | TIM9;TIM9A                             | zinc ion    | mitochond<br>mitochond     |
| GI_21359895-S | 628.4   | 695.2  | 567.8  | KLHL2    | <a href="#">NM_007246.2</a> | MAYVEN;ABP-KELCH                       |             |                            |
| GI_21359898-S | 709.9   | 761.8  | 577.2  | C22orf2  | <a href="#">NM_015373.2</a> | CBY;arb1;HS508I15A                     |             |                            |
| GI_21359899-S | 85.9    | 86.5   | 79.5   | C20orf28 | <a href="#">NM_015417.2</a> | DKFZP434I114                           |             |                            |
| GI_21359901-S | 3943.2  | 4208.3 | 2989.8 | TINP1    | <a href="#">NM_014886.2</a> | YR-29;HCL-G1                           | structural  | ribosome<br>protein        |
| GI_21359902-S | 1262.1  | 1511.6 | 906    | HDFGRP3  | <a href="#">NM_016073.2</a> | HDFG2;CGI-142                          |             | nucleus<br>cell            |
| GI_21359903-S | 304.4   | 365.5  | 333.5  | TFE3     | <a href="#">NM_006521.3</a> | RCCP2                                  | tumor       | nucleus<br>oncogene        |
| GI_21359904-S | 471     | 549.2  | 446.2  | SH3GLB1  | <a href="#">NM_016009.2</a> | Bif-1;CGI-61;KIAA0491                  |             |                            |
| GI_21359905-S | 17070.5 | 12312  | 11320  | GLTSCR2  | <a href="#">NM_015710.2</a> |                                        | tumor       |                            |
| GI_21359908-S | 456.9   | 340.4  | 363.5  | ZNF593   | <a href="#">NM_015871.2</a> | ZT86                                   | transcripti | nucleus<br>negative        |
| GI_21359910-S | 601.3   | 522.2  | 454.9  | ACP6     | <a href="#">NM_016361.2</a> | LPAP;ACPL1;PACPL1                      | acid        | mitochond<br>lipid         |
| GI_21359917-S | 995.7   | 964.3  | 950.7  | AWP1     | <a href="#">NM_019006.2</a> |                                        |             |                            |
| GI_21359919-S | 125.5   | 148.5  | 135.7  | ROPN1    | <a href="#">NM_017578.2</a> | ODF6;RHPNAP1;ropporin;DKFZp434B1222    |             |                            |
| GI_21359921-S | 1033.9  | 906.8  | 1072.3 | FLJ10581 | <a href="#">NM_018146.2</a> | HC90                                   | RNA         | RNA                        |
| GI_21359925-S | 647.2   | 752.2  | 534.8  | HMG20A   | <a href="#">NM_018200.2</a> | FLJ10739                               | transcripti | nucleus<br>establish       |
| GI_21359926-S | 724     | 674.7  | 743.9  | FLJ10842 | <a href="#">NM_018238.2</a> |                                        | diacylglyc  | protein                    |
| GI_21359927-S | 114.4   | 133.8  | 110    | SIAT7A   | <a href="#">NM_018414.2</a> | HSY11339;ST6GalNAcI                    |             |                            |
| GI_21359928-S | 3238.6  | 4715.5 | 3078.2 | XPNPEP1  | <a href="#">NM_020383.2</a> | SAMP;XPNPEP;XPNPEPL                    | aminopept   |                            |
| GI_21359931-S | 92.6    | 109.4  | 105.1  | C8orf4   | <a href="#">NM_020130.2</a> | TC1;TC-1;hTC-1                         |             |                            |
| GI_21359932-S | 108.9   | 110.3  | 90     | LXN      | <a href="#">NM_020169.2</a> |                                        |             |                            |
| GI_21359934-S | 406.6   | 506.8  | 462.6  | DSCAML1  | <a href="#">NM_020693.2</a> | KIAA1132                               | carboxype   | proteolysis                |
| GI_21359936-S | 198.2   | 218.5  | 196.2  | KIAA1173 | <a href="#">NM_020707.2</a> | C3orf3                                 | molecular   | cytoplasm<br>biological_   |
| GI_21359942-S | 3577    | 3001   | 3083.8 | RHBDF1   | <a href="#">NM_022450.2</a> | Dist1;C16orf8;EGFR-RS;FLJ2235;FLJ22357 |             |                            |
| GI_21359944-S | 681.7   | 634    | 839.1  | HCAP-G   | <a href="#">NM_022346.2</a> | CAPG;CHCG;CAP-G;NY-MEL-3               |             | nucleus<br>mitotic         |
| GI_21359948-S | 253.8   | 320.8  | 278.2  | MYOZ1    | <a href="#">NM_021245.2</a> | CS-2;FATZ;MYOZ                         |             |                            |
| GI_21359954-S | 942.6   | 799.9  | 861.6  | SBP2     | <a href="#">NM_024077.2</a> | MGC3156;DKFZp434B216                   | structural  | ribosome<br>protein        |
| GI_21359956-S | 662.9   | 811.9  | 889    | FLJ21047 | <a href="#">NM_024569.2</a> |                                        |             |                            |
| GI_21359958-S | 493.1   | 560.6  | 489.5  | FLJ23584 | <a href="#">NM_024588.2</a> |                                        |             |                            |
| GI_21359959-S | 126.7   | 130.9  | 122.9  | BGR      | <a href="#">NM_030924.2</a> | PRTD-NY3;DKFZp434K1635                 | catalytic   | metabolis                  |
| GI_21359961-S | 2226.9  | 2746.7 | 2650   | C6orf62  | <a href="#">NM_030939.2</a> | FLJ12619;dJ30M3.2;DKFZP564G182         |             |                            |
| GI_21359962-S | 1009    | 1092.9 | 1094.6 | COP1     | <a href="#">NM_022457.4</a> | FLJ10416                               |             |                            |
| GI_21359964-S | 3846.4  | 4466.6 | 4059   | CRR9     | <a href="#">NM_030782.2</a> | DKFZP761M2324                          |             |                            |

|               |        |        |        |           |                             |                                         |             |                     |             |  |
|---------------|--------|--------|--------|-----------|-----------------------------|-----------------------------------------|-------------|---------------------|-------------|--|
| GI_21359970-S | 1177.2 | 1048.1 | 1521   | ALS2CR2   | <a href="#">NM_018571.4</a> | PAPK;ILPIP;ILPIPA;CAL5-21;PRO1038       | ATP         | cellular_co protein |             |  |
| GI_21359973-S | 130.8  | 148.5  | 145.1  | VIT       | <a href="#">NM_053276.2</a> |                                         |             |                     |             |  |
| GI_21359975-S | 135.8  | 144.9  | 133    | SCGB3A2   | <a href="#">NM_054023.2</a> | LU103;PNSP1;UGRP1                       |             |                     |             |  |
| GI_21359977-S | 237.5  | 298.9  | 260.6  | PHC3      | <a href="#">NM_024947.2</a> | EDR3;HPH3;FLJ12729;FLJ12967             |             |                     |             |  |
| GI_21359981-S | 184.2  | 170.8  | 181.4  | HINT3     | <a href="#">NM_138571.3</a> | HINT4;FLJ33126;MGC:22976                |             |                     |             |  |
| GI_21359983-S | 7243.9 | 7080.4 | 4642   | CSDA      | <a href="#">NM_003651.3</a> | DBPA;ZONAB                              | double-     | perinuclea          | response    |  |
| GI_21361069-S | 5639.5 | 5233   | 6463.3 | PFKL      | <a href="#">NM_002626.2</a> |                                         | magnesi     | 6-                  | fructose    |  |
| GI_21361071-S | 1009.9 | 947.8  | 829    | RAB2L     | <a href="#">NM_004761.2</a> | RGL2;KE1.5;HKE1.5                       | Ras         | cellular_co         | neuropepti  |  |
| GI_21361076-S | 96     | 105.2  | 102.4  | CACNA1I   | <a href="#">NM_021096.2</a> |                                         | voltage-    | voltage-            | small       |  |
| GI_21361081-S | 429.8  | 257.6  | 114.7  | CRLF1     | <a href="#">NM_004750.2</a> | NR6;CISS;CLF-1                          | receptor    | extracellul         | antimicrob  |  |
| GI_21361085-S | 100.2  | 100.6  | 100.1  | TNFRSF10A | <a href="#">NM_003844.2</a> | DR4;APO2;MGC9365;TRAILR1;TRAILR-1       | death       | integral to         | induction   |  |
| GI_21361087-A | 865.3  | 626.8  | 1140.7 | SPHK1     | <a href="#">NM_021972.2</a> | SPHK                                    | diacylglyc  | cytosol             | sphingosin  |  |
| GI_21361089-S | 123.8  | 133    | 121.6  | SCN2B     | <a href="#">NM_004588.2</a> |                                         | voltage-    | integral to         | sodium      |  |
| GI_21361092-S | 1792   | 1691.8 | 1252.1 | TPST1     | <a href="#">NM_003596.2</a> |                                         | protein-    | Golgi               | peptidyl-   |  |
| GI_21361093-S | 1225.1 | 1639.1 | 2034.3 | IKBK      | <a href="#">NM_003639.2</a> | IP2;FIP3;NEMO;FIP-3;Fip3p;IKK-gamma     | signal      | kinesin             | NIK-I-      |  |
| GI_21361096-S | 1325.6 | 1463.8 | 1210.4 | GNG10     | <a href="#">NM_004125.2</a> |                                         | heterotrim  | peripheral          | signal      |  |
| GI_21361098-S | 757.5  | 888.3  | 864.5  | CGGBP1    | <a href="#">NM_003663.2</a> | CGGBP;p20-CGGBP                         | double-     | nucleus             |             |  |
| GI_21361102-S | 213    | 198.6  | 205.7  | SLC25A12  | <a href="#">NM_003705.2</a> | ARALAR;ARALAR1                          | solute:cati | mitochond           | small       |  |
| GI_21361104-S | 203.4  | 250.5  | 208.4  | RODH-4    | <a href="#">NM_003708.2</a> |                                         | retinol     | microsom            | lipid       |  |
| GI_21361107-S | 79.3   | 85     | 81.8   | ELF3      | <a href="#">NM_004433.2</a> | ERT;ESX;EPR-1;ESE-1                     | transcripti |                     | embryoge    |  |
| GI_21361108-S | 130.3  | 157.2  | 130.2  | NR2E1     | <a href="#">NM_003269.2</a> | TLL;TLX;XTLL                            | steroid     | nucleus             | neurogene   |  |
| GI_21361115-S | 420.7  | 3414.6 | 1342.5 | CSPG2     | <a href="#">NM_004385.2</a> | VERSICAN                                | glycosami   | extracellul         | cell        |  |
| GI_21361125-S | 710.7  | 695    | 706.2  | SLC37A4   | <a href="#">NM_001467.2</a> | G6PT1;GSD1b;PRO0685;MGC15729            | transporte  | microsom            | glycogen    |  |
| GI_21361134-S | 361.4  | 289.8  | 352.7  | NFKBIB    | <a href="#">NM_002503.2</a> | IKBB;TRIP9                              | transcripti |                     | transcripti |  |
| GI_21361147-S | 106.1  | 111.4  | 106.7  | CHRNA6    | <a href="#">NM_004198.2</a> | CHNRA6                                  | nicotinic   | nicotinic           | small       |  |
| GI_21361148-S | 279.8  | 318.6  | 290.3  | RGS7      | <a href="#">NM_002924.2</a> |                                         | signal      | heterotrim          | regulation  |  |
| GI_21361154-S | 143.9  | 181.1  | 176.1  | EIF2AK3   | <a href="#">NM_004836.2</a> | PEK;WRS;PERK                            | protein     | endoplas            | translation |  |
| GI_21361156-S | 552.2  | 437.4  | 545.8  | HOMER3    | <a href="#">NM_004838.2</a> | HOMER-3                                 |             |                     | metabotro   |  |
| GI_21361160-S | 119.8  | 103.4  | 103.8  | SURB7     | <a href="#">NM_004264.2</a> | SRB7                                    | DNA-        | DNA-                | regulation  |  |
| GI_21361162-S | 343    | 266.3  | 159.7  | GGCX      | <a href="#">NM_000821.2</a> | VKCFD1                                  | gamma-      | integral to         | blood       |  |
| GI_21361164-I | 76.3   | 89.6   | 81.8   | HTR4      | <a href="#">NM_000870.2</a> |                                         | serotonin   | integral to         | G-protein   |  |
| GI_21361166-S | 179.3  | 219    | 182.4  | ART3      | <a href="#">NM_001179.2</a> |                                         | NAD ADP-    | integral to         | protein     |  |
| GI_21361190-S | 96.3   | 112.3  | 104.8  | FCGR2B    | <a href="#">NM_004001.2</a> | CD32;FCG2;FCGR2;IGFR2                   | internaliza | integral to         | signal      |  |
| GI_21361192-S | 5318.5 | 5252.6 | 5837.7 | CD44      | <a href="#">NM_000610.2</a> | IN;INLU;MC56;MDU2;MDU3;MIC4;Pgp1;CD4    | collagen    | integral to         | cell-matrix |  |
| GI_21361197-S | 117.1  | 198.6  | 150.3  | SERPINA1  | <a href="#">NM_000295.2</a> | PI;A1A;AAT;PI1;A1AT;alpha-1-antitrypsin | endopepti   |                     | acute-      |  |
| GI_21361201-S | 123.8  | 154.9  | 133.6  | PCYT1B    | <a href="#">NM_004845.2</a> | CTB;CCT-beta                            | choline-    | endoplas            | phosphati   |  |
| GI_21361206-S | 157.7  | 295.6  | 184.7  | ITGB4     | <a href="#">NM_000213.2</a> |                                         | cell        | integrin            | cell        |  |
| GI_21361211-S | 116.8  | 122.7  | 114.7  | CTLA4     | <a href="#">NM_005214.2</a> | CD152                                   |             | integral to         | immune      |  |
| GI_21361242-S | 2200.3 | 3369.7 | 1850.2 | HSPA5     | <a href="#">NM_005347.2</a> | BIP;MIF2;GRP78                          | chaperone   | endoplas            | response    |  |
| GI_21361243-S | 531.9  | 475.5  | 430.8  | PEX6      | <a href="#">NM_000287.2</a> | PAF2;PAF-2;PXAAA1                       | peroxisom   | cytoplasm           | protein-    |  |
| GI_21361251-S | 1854.4 | 1695.6 | 1717.8 | SMC4L1    | <a href="#">NM_005496.2</a> | CAPC;CAP-C;hCAP-C                       | DNA         | cytoplasm           | mitotic     |  |
| GI_21361253-S | 107.2  | 116.4  | 98.7   | DNASE1    | <a href="#">NM_005223.2</a> | DNL1                                    | endonucle   | extracellul         | apoptosis   |  |
| GI_21361257-S | 3207   | 1381.8 | 1920.9 | ARHE      | <a href="#">NM_005168.2</a> | RHOE;RND3                               | Rho small   | peripheral          | actin       |  |
| GI_21361259-S | 351.6  | 437.2  | 356.1  | APLP1     | <a href="#">NM_005166.2</a> | APLP                                    | amyloid     | basement            | histogene   |  |

|               |        |        |        |          |                             |                                 |              |                          |
|---------------|--------|--------|--------|----------|-----------------------------|---------------------------------|--------------|--------------------------|
| GI_21361261-S | 109.8  | 114.4  | 113.1  | PDE1A    | <a href="#">NM_005019.2</a> | HCAM1;HSPDE1A                   | calmoduli    | signal                   |
| GI_21361267-S | 1409.5 | 1776.7 | 1086.2 | TNIP1    | <a href="#">NM_006058.2</a> | VAN;NAF1;ABIN-1;KIAA0113        | protein      | kinesin pathogene        |
| GI_21361270-S | 149.6  | 161.9  | 136.8  | MADH9    | <a href="#">NM_005905.2</a> | MADH6;SMAD9;SMAD8A;SMAD8B       |              | intracellula regulation  |
| GI_21361271-S | 8132.6 | 7900.6 | 6643.3 | MLLT1    | <a href="#">NM_005934.2</a> | ENL;LTG19                       | RNA          | nucleus oncogene         |
| GI_21361279-S | 1638.8 | 1651.2 | 1747.3 | TSFM     | <a href="#">NM_005726.2</a> | EF-TS;EF-Tsmt                   | transcripti  | mitochond translation    |
| GI_21361283-S | 677.9  | 747.5  | 628.9  | SMNDC1   | <a href="#">NM_005871.2</a> | SMNR;SPF30                      | pre-mRNA     | spliceoso induction      |
| GI_21361284-S | 739.6  | 811.1  | 520.4  | RCL1     | <a href="#">NM_005772.2</a> | RNAC;RPCL1                      | RNA-3'       | nucleolus biological_    |
| GI_21361288-S | 68     | 69     | 65.2   | PLAA     | <a href="#">NM_004253.2</a> | PLAP;PLA2P                      | phospholi    | phospholi                |
| GI_21361291-S | 741.5  | 803.7  | 771.1  | RBL2     | <a href="#">NM_005611.2</a> | Rb2;P130                        | protein      | nucleus oncogene         |
| GI_21361293-S | 132.6  | 166.1  | 158.9  | KLRG1    | <a href="#">NM_005810.2</a> | 2F1;MAFA;MAFAL;MAFA-L;MAFA-2F1  | lectin [goid | integral to cell         |
| GI_21361295-S | 134.5  | 161.6  | 147.2  | PSG5     | <a href="#">NM_002781.2</a> | FL-NCA-3                        | plasma       | extracellul pregnancy    |
| GI_21361297-S | 99.8   | 99.7   | 88.1   | ELA3A    | <a href="#">NM_005747.2</a> | ELA3                            | pancreatic   | cholestero               |
| GI_21361299-S | 231.4  | 254.4  | 220.1  | LIM2     | <a href="#">NM_030657.2</a> | MP19                            | structural   | integral to intercellula |
| GI_21361301-S | 105.2  | 118.8  | 101.9  | SERPINA4 | <a href="#">NM_006215.2</a> | KAL;KST;PI4;KLST;kallistatin    | protein      |                          |
| GI_21361305-S | 171.5  | 211.4  | 192.1  | NTRK2    | <a href="#">NM_006180.2</a> | TRKB                            | neurotrop    | integral to transmem     |
| GI_21361307-S | 101.8  | 102.4  | 90.3   | PDE6C    | <a href="#">NM_006204.2</a> | PDEA2                           | cGMP-        | membran vision           |
| GI_21361309-S | 187.6  | 157.3  | 124.7  | IFI44    | <a href="#">NM_006417.2</a> | p44;MTAP44                      | antiviral    | cytoplasm response       |
| GI_21361321-S | 200.1  | 221.4  | 204.5  | TUBB5    | <a href="#">NM_006087.2</a> |                                 | structural   | cytoskelet               |
| GI_21361323-S | 1387.6 | 1620.7 | 1129   | NDUFV3   | <a href="#">NM_021075.2</a> |                                 | NADH         | NADH mitochond           |
| GI_21361328-S | 98.2   | 97.4   | 106.1  | RGR      | <a href="#">NM_002921.2</a> |                                 | G-protein    | integral to vision       |
| GI_21361330-S | 478.2  | 611.4  | 508    | CPS1     | <a href="#">NM_001875.2</a> |                                 | carbamoyl-   | mitochond urea cycle     |
| GI_21361335-S | 863.2  | 976.6  | 990.9  | DUT      | <a href="#">NM_001948.2</a> | dUTPase                         | dUTP         | mitochond nucleobas      |
| GI_21361338-S | 121.9  | 127.1  | 134.8  | ELAVL4   | <a href="#">NM_021952.2</a> | HUD;PNEM                        | mRNA 3'      | RNA                      |
| GI_21361339-S | 794.5  | 667.1  | 832.6  | GSK3B    | <a href="#">NM_002093.2</a> |                                 | glycogen     | glycogen                 |
| GI_21361347-S | 1901.2 | 1593.7 | 1357.8 | SDCCAG16 | <a href="#">NM_006649.2</a> | NY-CO-16                        | tumor        |                          |
| GI_21361349-S | 3410   | 2221.1 | 2105.8 | SDCCAG3  | <a href="#">NM_006643.2</a> | NY-CO-3                         | tumor        |                          |
| GI_21361351-S | 153.8  | 165.9  | 163.8  | IMP-1    | <a href="#">NM_006546.2</a> | IMP1;CRDBP;CRD-BP;VICKZ1        | RNA          | cytoplasm translation    |
| GI_21361362-S | 511.9  | 386.4  | 320.4  | RALBP1   | <a href="#">NM_006788.2</a> | RIP;RIP1;RLIP76                 | GTPase       | membran chemotaxi        |
| GI_21361365-S | 1220   | 1109.3 | 1278.5 | IFRD2    | <a href="#">NM_006764.2</a> | SM15;IFNRP;SKMc15               | molecular    | cellular_co cell         |
| GI_21361367-S | 1482.3 | 1728.9 | 875.3  | PYCS     | <a href="#">NM_002860.2</a> | GSAS;P5CS                       | N-acetyl-    | mitochond proline        |
| GI_21361371-S | 142.2  | 170.8  | 156.2  | SLC14A2  | <a href="#">NM_007163.2</a> | UT2;UTR;HUT2                    | urea         | integral to urea         |
| GI_21361373-S | 519.8  | 540.5  | 449.1  | SP140    | <a href="#">NM_007237.2</a> | LYSP100-A;LYSP100-B             | transcripti  | nuclear defense          |
| GI_21361377-S | 329.1  | 368.7  | 250.1  | SARDH    | <a href="#">NM_007101.2</a> | SAR;SDH;SARD;DMGDHL1            | sarcosine    | mitochond                |
| GI_21361379-S | 1380.6 | 1976.8 | 1659.6 | EAP30    | <a href="#">NM_007241.2</a> |                                 | RNA          | regulation               |
| GI_21361381-S | 1179   | 1081.9 | 1037.9 | POMT1    | <a href="#">NM_007171.2</a> | RT                              | mannosylt    | integral to O-linked     |
| GI_21361386-S | 119.5  | 135.7  | 131    | RXRG     | <a href="#">NM_006917.2</a> | RXRC;NR2B3                      | retinoid-X   | nucleus regulation       |
| GI_21361387-S | 172.2  | 195.8  | 155.5  | SMT3H2   | <a href="#">NM_006937.2</a> | HSMT3;SMT3B;SUMO-2              |              | small                    |
| GI_21361391-S | 81.9   | 89.1   | 99.3   | PSG1     | <a href="#">NM_006905.2</a> | SP1;B1G1;PBG1;CD66f;PSBG1;PSGGA | plasma       | extracellul pregnancy    |
| GI_21361393-S | 112.6  | 116.3  | 120.7  | AP4S1    | <a href="#">NM_007077.2</a> | AP47B;CLA20;CLAPS4              | vesicle      | coated nonselecti        |
| GI_21361396-S | 784    | 776.6  | 966.3  | RACGAP1  | <a href="#">NM_013277.2</a> | ID-GAP;MgcRacGAP                |              | intracellula             |
| GI_21361404-S | 644.4  | 366    | 824.5  | RGS17    | <a href="#">NM_012419.3</a> | RGSZ2;RGS-17                    | signal       | membran signal           |
| GI_21361406-S | 1874.5 | 2111.7 | 2287.8 | HSPBP1   | <a href="#">NM_012267.2</a> |                                 | enzyme       | protein                  |
| GI_21361410-S | 364.3  | 564    | 619.7  | HBP1     | <a href="#">NM_012257.2</a> |                                 | DNA          | regulation               |
| GI_21361412-S | 142.5  | 173.2  | 150.5  | DNAJB5   | <a href="#">NM_012266.2</a> | Hsc40                           | heat         | response                 |

|               |        |        |        |            |                             |                                    |              |             |              |
|---------------|--------|--------|--------|------------|-----------------------------|------------------------------------|--------------|-------------|--------------|
| GI_21361426-S | 108.9  | 110.8  | 100.3  | E2IG5      | <a href="#">NM_014367.2</a> |                                    |              |             |              |
| GI_21361430-S | 965.4  | 898.6  | 940.9  | RCD-8      | <a href="#">NM_014329.2</a> | Ge-1                               | molecular    | nucleus     | biological_  |
| GI_21361432-S | 376.6  | 322.5  | 372.3  | PLK4       | <a href="#">NM_014264.2</a> | SAK;STK18                          | protein      |             | protein      |
| GI_21361439-S | 1138.3 | 417.8  | 333.7  | RAB3IL1    | <a href="#">NM_013401.2</a> |                                    |              |             |              |
| GI_21361441-S | 829.8  | 1065.6 | 1058.3 | C18orf8    | <a href="#">NM_013326.2</a> | MIC1;HsT2591                       |              |             |              |
| GI_21361446-S | 89.5   | 100.8  | 82.2   | RGS1       | <a href="#">NM_002922.2</a> | 1R20;BL34;IER1;IR20                | GTPase       | plasma      | G-protein    |
| GI_21361448-S | 484.6  | 461.4  | 459.7  | SLC2A8     | <a href="#">NM_014580.2</a> | GLUT8;GLUTX1                       | glucose      | integral to | glucose      |
| GI_21361451-S | 383.1  | 533.9  | 395.7  | GLS        | <a href="#">NM_014905.2</a> | GLS1;KIAA0838                      | glutamina    | mitochond   | glutamine    |
| GI_21361453-S | 1468   | 1119.3 | 1088.7 | PYCR2      | <a href="#">NM_013328.2</a> | P5CR2                              | pyrroline-5- |             | proline      |
| GI_21361457-S | 502.1  | 563.1  | 396.1  | ARHGEF17   | <a href="#">NM_014786.2</a> | TEM4;KIAA0337;P164RHOGEF;p164-     |              |             |              |
| GI_21361461-S | 826.3  | 1288.5 | 1654.9 | EHD2       | <a href="#">NM_014601.2</a> |                                    | nucleic      | nucleus     |              |
| GI_21361467-S | 1461.7 | 1385.9 | 1328.6 | DKFZP586L0 | <a href="#">NM_015462.2</a> |                                    |              |             |              |
| GI_21361469-S | 741.3  | 742    | 756.7  | DC8        | <a href="#">NM_015471.2</a> | DKFZP566O1646                      |              |             |              |
| GI_21361471-S | 2344.8 | 1344.2 | 1102.1 | NEDD4L     | <a href="#">NM_015277.2</a> | RSP5;KIAA0439;hNedd4-2             |              |             |              |
| GI_21361481-S | 284.5  | 278    | 248.4  | RWDD3      | <a href="#">NM_015485.2</a> | DKFZP566K023                       |              |             |              |
| GI_21361484-S | 437.8  | 541.9  | 510.1  | DKFZP434P1 | <a href="#">NM_015527.2</a> |                                    | catalytic    |             | metabolis    |
| GI_21361486-S | 173    | 164.6  | 155.7  | DKFZP434D1 | <a href="#">NM_015595.2</a> | SGEF;CSGEF                         |              |             |              |
| GI_21361488-S | 330.5  | 342.8  | 310.4  | DKFZP566F2 | <a href="#">NM_015630.2</a> |                                    |              |             |              |
| GI_21361494-S | 287.2  | 261.9  | 240    | PTD012     | <a href="#">NM_014039.2</a> |                                    |              |             |              |
| GI_21361498-S | 642.9  | 758.3  | 686.3  | SENP3      | <a href="#">NM_015670.2</a> | SSP3;SMT3IP1;DKFZP586K0919         | cysteine-    | nucleus     | proteolysis  |
| GI_21361500-S | 175.1  | 204.1  | 186.1  | LR8        | <a href="#">NM_014020.2</a> |                                    |              |             | histogene    |
| GI_21361502-S | 537    | 658.1  | 416.8  | SLC35B3    | <a href="#">NM_015948.2</a> | CGI-19;C6orf196;dJ453H5.1          |              |             |              |
| GI_21361508-S | 442.8  | 662    | 764.7  | RAB4B      | <a href="#">NM_016154.2</a> |                                    | GTP          | cellular_co | small        |
| GI_21361510-S | 222.2  | 273.9  | 257.9  | LOC51061   | <a href="#">NM_015914.2</a> |                                    | electron     |             | electron     |
| GI_21361512-S | 283.6  | 287.7  | 379.3  | CGI-14     | <a href="#">NM_015944.2</a> |                                    |              |             |              |
| GI_21361518-S | 3297.5 | 4349.3 | 5343.8 | ADIPOR1    | <a href="#">NM_015999.2</a> | CGI-45                             | receptor     | integral to | fatty acid   |
| GI_21361522-S | 612.2  | 551.2  | 599.2  | MGC14560   | <a href="#">NM_016301.2</a> | MGC32810                           | ATP          |             |              |
| GI_21361524-S | 565.3  | 592    | 584.6  | CGI-41     | <a href="#">NM_015997.2</a> |                                    |              |             |              |
| GI_21361528-S | 193.7  | 207.5  | 209.5  | LOC51136   | <a href="#">NM_016125.2</a> |                                    |              |             |              |
| GI_21361533-S | 6629.1 | 7612.8 | 6776.6 | C13orf12   | <a href="#">NM_015932.2</a> | HSPC014                            |              |             |              |
| GI_21361534-S | 3176.3 | 3395.8 | 3030.5 | HSPC138    | <a href="#">NM_016401.2</a> | HSPC179                            |              |             |              |
| GI_21361536-S | 875.4  | 1203.2 | 1165.2 | C14orf100  | <a href="#">NM_016475.2</a> | HSPC213                            |              |             |              |
| GI_21361540-S | 118.4  | 114.6  | 109.8  | HYPK       | <a href="#">NM_016400.2</a> | HSPC136                            | protein      |             |              |
| GI_21361544-S | 1976.6 | 1928.2 | 1877.6 | NIPA       | <a href="#">NM_016478.2</a> | HSPC216                            |              |             |              |
| GI_21361550-S | 495.1  | 562.4  | 725    | SLC4A2     | <a href="#">NM_003040.2</a> | AE2;HKB3;BND3L;NBND3;EPB3L1        | anion        | membran     | anion        |
| GI_21361554-S | 101.5  | 108.2  | 94.5   | TNNI1      | <a href="#">NM_003281.2</a> |                                    | tropomyos    | troponin    | regulation   |
| GI_21361560-S | 496.8  | 664.6  | 684.9  | ZNF35      | <a href="#">NM_003420.2</a> | HF10;HF.10                         | transcripti  | nucleus     | regulation   |
| GI_21361562-S | 135.3  | 198.6  | 111.1  | SLC7A7     | <a href="#">NM_003982.2</a> | LPI;LAT3;Y+LAT1;y+LAT-1            | basic        | integral to | small        |
| GI_21361564-S | 8842.4 | 10272  | 8628   | ATP5F1     | <a href="#">NM_001688.2</a> |                                    | hydrogen-    | mitochond   | proton       |
| GI_21361570-S | 157.7  | 192.3  | 154.1  | CD48       | <a href="#">NM_001778.2</a> | BCM1;BLAST;hCD48;mCD48;BLAST1;SLAM | lymphocyt    | integral to | defense      |
| GI_21361572-S | 605.6  | 874.7  | 487    | CHN1       | <a href="#">NM_001822.2</a> | CHN;ARHGAP2;RHOGAP2                | SH3/SH2      |             | intracellula |
| GI_21361575-S | 451.2  | 449.3  | 429.5  | PS1D       | <a href="#">NM_016505.2</a> | pNO40;HSPC251                      |              |             |              |
| GI_21361580-S | 142.7  | 164    | 168.7  | SLC6A13    | <a href="#">NM_016615.2</a> | GAT2;GAT-2                         |              |             |              |
| GI_21361584-S | 2093.3 | 2391.8 | 1390.2 | KIAA0992   | <a href="#">NM_016081.2</a> | SIH002;CGI-151                     |              |             | amino        |



|               |        |        |        |           |                             |                                  |            |              |              |
|---------------|--------|--------|--------|-----------|-----------------------------|----------------------------------|------------|--------------|--------------|
| GI_21361594-S | 112.1  | 102.8  | 87.8   | SLCO1C1   | <a href="#">NM_017435.2</a> | OATP1;OATP-F;OATP1C1;SLC21A14    | transporte | integral to  | ion          |
| GI_21361595-S | 3757.8 | 3381.1 | 3107.4 | FLJ21174  | <a href="#">NM_024863.3</a> |                                  |            |              |              |
| GI_21361597-S | 467.4  | 374.6  | 354.7  | MPP6      | <a href="#">NM_016447.2</a> | VAM1;p55T;PALS2;VAM-1            | protein    | membran      | intracellula |
| GI_21361599-S | 155.8  | 132    | 108.1  | SLC37A1   | <a href="#">NM_018964.2</a> | G3PP                             | sugar      | integral to  | transport    |
| GI_21361603-S | 144.4  | 158.2  | 119.9  | SH3TC1    | <a href="#">NM_018986.2</a> | FLJ20356                         |            |              |              |
| GI_21361605-S | 3867   | 3576.8 | 2379.4 | MDS025    | <a href="#">NM_021825.3</a> | MDS011                           |            |              |              |
| GI_21361610-S | 999.9  | 1297.9 | 968.7  | CKIP-1    | <a href="#">NM_016274.3</a> |                                  |            |              |              |
| GI_21361611-A | 256    | 283.1  | 267.1  | HTF9C     | <a href="#">NM_022727.3</a> | D22S1733E                        | S-         |              |              |
| GI_21361611-I | 225.7  | 273.2  | 227.2  | HTF9C     | <a href="#">NM_022727.3</a> | D22S1733E                        | S-         |              |              |
| GI_21361613-S | 398    | 478    | 367    | STK11     | <a href="#">NM_000455.3</a> | PJS;LKB1                         | protein    |              | protein      |
| GI_21361614-S | 632.7  | 778.7  | 647.7  | SARA1     | <a href="#">NM_020150.3</a> | SAR1;Sara;SAR1A;masra2           | GTP        | Golgi        | small        |
| GI_21361615-S | 72.2   | 90     | 84.2   | CHST8     | <a href="#">NM_022467.3</a> |                                  | transferas |              |              |
| GI_21361616-S | 141.6  | 137.3  | 132.3  | FLJ20152  | <a href="#">NM_019000.2</a> |                                  |            |              |              |
| GI_21361618-S | 395.3  | 431.6  | 497.2  | TOLLIP    | <a href="#">NM_019009.2</a> | IL-1RAcPIP                       |            |              | signal       |
| GI_21361620-S | 1677.7 | 2863.6 | 2513.4 | PGM1      | <a href="#">NM_002633.2</a> |                                  | magnesi    | cytoplasm    | glucose      |
| GI_21361622-S | 137.1  | 138.6  | 119.4  | FLJ10996  | <a href="#">NM_019044.2</a> | MGC13033                         |            |              |              |
| GI_21361628-S | 534.8  | 480.3  | 384.6  | ELP4      | <a href="#">NM_019040.2</a> | PAXNEB;PAX6NEB;C11orf19;FLJ20498 |            |              |              |
| GI_21361630-S | 1058.8 | 959    | 727.2  | RRN3      | <a href="#">NM_018427.2</a> | DKFZp566E104                     | RNA        |              | transcripti  |
| GI_21361632-S | 118.3  | 132.7  | 120    | FLJ20331  | <a href="#">NM_017768.3</a> |                                  | acid       |              |              |
| GI_21361636-S | 404.1  | 494    | 684.3  | TBC1D13   | <a href="#">NM_018201.2</a> | FLJ10743                         |            |              |              |
| GI_21361644-S | 377.6  | 582.8  | 627.9  | DLG7      | <a href="#">NM_014750.3</a> | DLG1;HURP;KIAA0008               | molecular  | cellular_co  | biological_  |
| GI_21361646-S | 2771   | 4340.1 | 2793.4 | AHCYL1    | <a href="#">NM_006621.3</a> | DCAL;IRBIT;XPVKONA               | adenosylh  |              | one-         |
| GI_21361648-S | 277.7  | 324    | 306.1  | OBDFP     | <a href="#">NM_017711.2</a> | GDE3;FLJ20207                    |            |              |              |
| GI_21361652-S | 584.4  | 530    | 559    | FLJ20364  | <a href="#">NM_017785.2</a> |                                  |            |              |              |
| GI_21361654-S | 107.2  | 117.4  | 109.9  | APIN      | <a href="#">NM_017855.2</a> | FLJ20513                         |            |              |              |
| GI_21361656-S | 5251.6 | 8007.2 | 6069.1 | GRP58     | <a href="#">NM_005313.3</a> | P58;ERp57;ERp60;ERp61;GRP57;PI-  | phospholi  | endoplas     | protein-     |
| GI_21361658-S | 250.7  | 303.6  | 313.3  | IPO9      | <a href="#">NM_018085.3</a> | Imp9;FLJ10402                    |            |              |              |
| GI_21361660-S | 141.1  | 163.4  | 146.5  | COMMD4    | <a href="#">NM_017828.2</a> | FLJ20452                         |            |              |              |
| GI_21361662-S | 199.8  | 195.3  | 189.3  | FLJ20546  | <a href="#">NM_017872.2</a> |                                  | signal     | heterotrim   | G-protein    |
| GI_21361667-S | 460.8  | 474.8  | 482.5  | VCY2IP1   | <a href="#">NM_018174.3</a> | C19ORF5;FLJ10669;VCY2IP-1        |            |              |              |
| GI_21361673-S | 220.4  | 293.7  | 262.8  | ZCWPW1    | <a href="#">NM_017984.2</a> | FLJ10057                         |            |              |              |
| GI_21361675-S | 173.5  | 209.9  | 178.4  | FEZL      | <a href="#">NM_018008.2</a> | TOF;FKSG36;FLJ10142              |            |              |              |
| GI_21361681-S | 2552.4 | 2789.3 | 2414   | TAX1BP1   | <a href="#">NM_006024.4</a> | T6BP;TXBP151                     | apoptosis  |              | anti-        |
| GI_21361683-S | 252.3  | 209.7  | 243.8  | ECGP      | <a href="#">NM_018025.2</a> | FLJ10206;FLJ38686                | nucleic    | intracellula |              |
| GI_21361685-S | 134.6  | 126.8  | 131.7  | FLJ10292  | <a href="#">NM_018048.2</a> |                                  |            | nucleus      | sex          |
| GI_21361686-S | 262.8  | 336.7  | 278.9  | FLJ10300  | <a href="#">NM_018051.2</a> |                                  |            |              |              |
| GI_21361690-S | 135.6  | 126.8  | 86.1   | TRPM8     | <a href="#">NM_024080.3</a> | TRPP8;LTRPC6;MGC2849             |            |              |              |
| GI_21361692-I | 773    | 628.4  | 717.9  | SLC6A15   | <a href="#">NM_018057.2</a> | V7-3;NTT73;hv7-3;FLJ10316        |            |              |              |
| GI_21361696-I | 699.4  | 764.6  | 929.5  | C14orf130 | <a href="#">NM_018108.2</a> | MGC9518;FLJ10483                 | ubiquitin- |              | ubiquitin    |
| GI_21361698-S | 2408.6 | 1853.5 | 1964.7 | SPHK2     | <a href="#">NM_020126.3</a> |                                  | diacylglyc | cytosol      | anti-        |
| GI_21361700-S | 99.9   | 99.9   | 84.4   | ZDHHC4    | <a href="#">NM_018106.2</a> | ZNF374;FLJ10479                  |            | integral to  |              |
| GI_21361703-S | 374.8  | 349.7  | 341    | FLJ10486  | <a href="#">NM_018109.2</a> |                                  | nucleic    |              |              |
| GI_21361708-S | 2633.9 | 2416.2 | 1802.9 | P15RS     | <a href="#">NM_018170.2</a> | FLJ10656                         | kinase     |              |              |
| GI_21361710-S | 261.7  | 279.3  | 255.2  | HCNGP     | <a href="#">NM_013260.3</a> |                                  |            |              |              |

|               |        |        |        |            |                             |                                      |              |                         |
|---------------|--------|--------|--------|------------|-----------------------------|--------------------------------------|--------------|-------------------------|
| GI_21361711-I | 141.9  | 162.5  | 150.1  | USP2       | <a href="#">NM_004205.3</a> | USP9;UBP41                           | cysteine-    | deubiquiti              |
| GI_21361719-S | 313.3  | 454.5  | 406.2  | TMEM19     | <a href="#">NM_018279.2</a> | FLJ10936                             |              |                         |
| GI_21361721-S | 169.1  | 204.9  | 192.1  | KIF13A     | <a href="#">NM_022113.3</a> | ba500C11.2                           |              |                         |
| GI_21361723-S | 1171.5 | 1159.5 | 927.5  | NXT2       | <a href="#">NM_018698.3</a> | P15-2                                | protein      | nucleus protein-        |
| GI_21361727-S | 164    | 200.2  | 181.7  | FLJ10979   | <a href="#">NM_018289.2</a> |                                      |              |                         |
| GI_21361729-S | 508.3  | 670.5  | 587.9  | FLJ10986   | <a href="#">NM_018291.2</a> |                                      |              | carbohydr               |
| GI_21361733-S | 1839.9 | 1489.7 | 1593.9 | FLJ10081   | <a href="#">NM_017991.3</a> | KIAA1310                             |              |                         |
| GI_21361735-S | 1140.7 | 1117.1 | 1008.1 | RICH1      | <a href="#">NM_018054.3</a> | NADRIN;FLJ10308;FLJ13219             |              |                         |
| GI_21361737-S | 149    | 138.2  | 146.7  | ARHT1      | <a href="#">NM_018307.2</a> | MIRO-1;FLJ11040                      |              |                         |
| GI_21361740-S | 1952.8 | 1857.5 | 1903.5 | C6orf55    | <a href="#">NM_016485.3</a> | My012;HSPC228                        |              |                         |
| GI_21361742-S | 86.5   | 90.6   | 80.2   | NIPSNAP3B  | <a href="#">NM_018376.2</a> | FLJ11275                             |              |                         |
| GI_21361744-S | 586.7  | 673.8  | 571.9  | STRBP      | <a href="#">NM_018387.2</a> | SPNR;MGC3405;FLJ11307;FLJ14223;FLJ14 |              |                         |
| GI_21361746-S | 543.1  | 605    | 657.3  | DKFZp762E1 | <a href="#">NM_018410.2</a> |                                      |              |                         |
| GI_21361756-S | 364.8  | 325.2  | 321.4  | PRO0971    | <a href="#">NM_018569.2</a> |                                      |              |                         |
| GI_21361758-S | 148    | 187.6  | 168.1  | MTMR8      | <a href="#">NM_017677.2</a> | FLJ20126                             |              |                         |
| GI_21361764-S | 848    | 822.3  | 912.1  | H17        | <a href="#">NM_017547.2</a> |                                      | oxidoredu    | electron                |
| GI_21361765-S | 584.8  | 541.4  | 366.5  | FLJ20531   | <a href="#">NM_017865.2</a> |                                      |              |                         |
| GI_21361767-S | 144.9  | 1093.3 | 319.4  | GLUL       | <a href="#">NM_002065.3</a> | GLNS                                 | glutamate-   | glutamine               |
| GI_21361768-S | 264.8  | 310.1  | 275.7  | CFLAR      | <a href="#">NM_003879.3</a> | CASH;FLIP;MRIT;CLARP;FLAME;Casper;FL | apoptosis    | induction               |
| GI_21361770-S | 777.3  | 617.3  | 645.9  | FLJ20477   | <a href="#">NM_017837.2</a> |                                      |              |                         |
| GI_21361775-S | 363.7  | 467.6  | 467.6  | C14orf108  | <a href="#">NM_018229.2</a> | FLJ10813                             |              |                         |
| GI_21361780-S | 1781.8 | 1941.8 | 1935.8 | FLJ10350   | <a href="#">NM_018067.2</a> |                                      |              |                         |
| GI_21361782-S | 94.3   | 90.7   | 89.8   | SRrp35     | <a href="#">NM_080743.2</a> |                                      | nucleic      | nucleus regulation      |
| GI_21361788-S | 239.3  | 204.9  | 257    | ZNF83      | <a href="#">NM_018300.2</a> | HPF1;FLJ11015                        |              |                         |
| GI_21361790-S | 2116.8 | 1718.5 | 1968.7 | FLJ20257   | <a href="#">NM_019606.3</a> |                                      | methyltran   |                         |
| GI_21361793-S | 748.7  | 852.6  | 830.3  | TIP120A    | <a href="#">NM_018448.2</a> | CAND1;TIP120;KIAA0829                |              |                         |
| GI_21361797-S | 108.3  | 112.1  | 111.5  | FAM3B      | <a href="#">NM_058186.2</a> | 2-21;ORF9;PRED44;C21orf11;C21orf76   | cytokine     | extracellul insulin     |
| GI_21361804-S | 224.4  | 249.7  | 360.2  | MDS028     | <a href="#">NM_018463.2</a> |                                      |              |                         |
| GI_21361808-S | 162.9  | 168.6  | 168.3  | LOC56267   | <a href="#">NM_019610.2</a> |                                      | nucleic      |                         |
| GI_21361810-S | 177.9  | 214.2  | 143.2  | C21orf51   | <a href="#">NM_058182.2</a> |                                      | molecular    | cellular_co biological_ |
| GI_21361811-I | 234.4  | 295.8  | 256.1  | EPB41L4B   | <a href="#">NM_019114.2</a> | CG1;EHM2;DKFZp761N1814               | structural   | cytoskelet cell shape   |
| GI_21361813-S | 451.8  | 557.2  | 461.8  | RP4-622L5  | <a href="#">NM_019118.2</a> | dJ622L5.7                            |              |                         |
| GI_21361815-S | 83.2   | 96.1   | 95.8   | CNGB3      | <a href="#">NM_019098.2</a> | ACHM3                                | intracellula | integral to vision      |
| GI_21361817-S | 368.3  | 390.5  | 339.5  | SBB126     | <a href="#">NM_018846.2</a> |                                      |              |                         |
| GI_21361819-S | 328.7  | 382.3  | 388.7  | FLJ21827   | <a href="#">NM_020153.2</a> |                                      |              |                         |
| GI_21361821-S | 5426.4 | 6533.8 | 5911.9 | GRIM19     | <a href="#">NM_015965.3</a> |                                      | NADH         | mitochond apoptosis     |
| GI_21361824-S | 121.5  | 134.3  | 147.5  | C11ORF4    | <a href="#">NM_020155.2</a> |                                      |              |                         |
| GI_21361826-S | 1035.3 | 899.9  | 962    | METTL3     | <a href="#">NM_019852.2</a> | M6A;Spo8                             | methyltran   | nucleus RNA             |
| GI_21361830-S | 104.7  | 100.6  | 101.4  | PARD3      | <a href="#">NM_019619.2</a> | ASIP;PAR3;SE2-5T2;SE2-5L16;SE2-      |              | tight asymmetri         |
| GI_21361832-S | 128.2  | 143.6  | 148    | TRPV5      | <a href="#">NM_019841.3</a> | CAT2;ECAC1                           | calcium      | integral to cation      |
| GI_21361833-I | 84.7   | 91.8   | 94.5   | SLC22A17   | <a href="#">NM_020372.2</a> | BOCT;BOIT;hBOIT                      | transporte   | integral to transport   |
| GI_21361836-S | 1217.1 | 1183.4 | 999.6  | HT014      | <a href="#">NM_020362.2</a> |                                      |              |                         |
| GI_21361838-S | 100.3  | 92.1   | 93.4   | RPGRIP1    | <a href="#">NM_020366.2</a> | LCA6;RGI1;CORD9;RGRIP                |              |                         |
| GI_21361844-S | 289.7  | 338.9  | 297.9  | PGLYRP2    | <a href="#">NM_052890.2</a> | tagL;PGRPL;PGRP-L;PGLYRPL;TAGL-      | peptidogly   | membran detection       |

|               |        |        |        |            |                             |                                |            |             |              |
|---------------|--------|--------|--------|------------|-----------------------------|--------------------------------|------------|-------------|--------------|
| GI_21361846-S | 241.8  | 270.8  | 230.6  | CA10       | <a href="#">NM_020178.2</a> | CARPX;CA-RPX;HUCEP-15          | carbonate  | cellular_co | brain        |
| GI_21361850-S | 1242   | 1132   | 1008.2 | LOC57117   | <a href="#">NM_020395.2</a> |                                | electron   |             | electron     |
| GI_21361852-S | 95     | 93.1   | 93.9   | PLXDC1     | <a href="#">NM_020405.3</a> | TEM3;TEM7                      | receptor   | membran     | developm     |
| GI_21361855-S | 193.1  | 193.2  | 178.9  | IDI2       | <a href="#">NM_033261.2</a> | IPPI2                          | isopenten  | peroxisom   | isoprenoid   |
| GI_21361860-S | 117.3  | 115.4  | 126.7  | FANCD2     | <a href="#">NM_033084.2</a> | FA4;FAD;FACD;FAD2;FA-D2;FANCD  |            |             |              |
| GI_21361862-S | 91     | 92.6   | 89.5   | STN2       | <a href="#">NM_033104.2</a> | STNB                           |            | membran     | endocytosi   |
| GI_21361864-S | 136.7  | 170.5  | 160.9  | NX17       | <a href="#">NM_020665.2</a> | NX-17                          |            |             |              |
| GI_21361865-I | 499.6  | 738    | 569.7  | ZNF3       | <a href="#">NM_032924.2</a> | A8-                            |            |             |              |
| GI_21361869-A | 555.1  | 584.6  | 529.5  | C11orf17   | <a href="#">NM_020642.2</a> | BCA3                           |            |             |              |
| GI_21361869-I | 1187.8 | 1147.7 | 1101.7 | C11orf17   | <a href="#">NM_020642.2</a> | BCA3                           |            |             |              |
| GI_21361878-S | 110.8  | 124.5  | 114.7  | NGB        | <a href="#">NM_021257.2</a> |                                | globin     | hemoglobi   | oxygen       |
| GI_21361882-S | 130.5  | 162.9  | 132.7  | IGSF4B     | <a href="#">NM_021189.2</a> | BIgR;NECL1;TSSL1;FLJ10698      | receptor   |             |              |
| GI_21361883-S | 1148.8 | 1164.7 | 1139.1 | RAB2B      | <a href="#">NM_032846.2</a> | FLJ14824                       |            |             |              |
| GI_21361885-S | 73.6   | 90.6   | 83.3   | FLJ14834   | <a href="#">NM_032849.2</a> |                                |            |             |              |
| GI_21361889-S | 1480.5 | 1001.3 | 1003.8 | KLHL12     | <a href="#">NM_021633.2</a> | C3IP1                          | protein    |             |              |
| GI_21361890-S | 119.1  | 169.9  | 206.6  | FLJ20967   | <a href="#">NM_022071.2</a> | SH2A                           |            |             | intracellula |
| GI_21361894-S | 808.5  | 1046.4 | 796.5  | FKBP10     | <a href="#">NM_021939.2</a> | FKBP65;hFKBP65;FLJ22041        |            |             |              |
| GI_21361898-S | 121.4  | 113.2  | 110.9  | SLC5A7     | <a href="#">NM_021815.2</a> | CHT;CHT1;hCHT                  | transporte | membran     | transport    |
| GI_21361899-S | 308.1  | 424.9  | 365.4  | MDS018     | <a href="#">NM_021823.2</a> |                                |            |             |              |
| GI_21361903-S | 2263.1 | 2086.7 | 1816.1 | ELOVL5     | <a href="#">NM_021814.2</a> | HELO1;DJ483K16.1               |            |             | integral to  |
| GI_21361906-S | 147.8  | 102.3  | 108.4  | ATP10A     | <a href="#">NM_024490.2</a> | ATPVA;ATPVC;ATP10C;KIAA0566    | ATP        | integral to | cation       |
| GI_21361907-S | 323.9  | 320.1  | 285.1  | GBL        | <a href="#">NM_022372.2</a> |                                |            |             |              |
| GI_21361911-S | 663.9  | 1083.4 | 673.2  | DNAJC1     | <a href="#">NM_022365.2</a> | HTJ1;DNAJL1                    | chaperone  | microsom    | negative     |
| GI_21361913-S | 151.7  | 157.3  | 139.4  | FLJ12287   | <a href="#">NM_022367.2</a> |                                | receptor   | integral to | developm     |
| GI_21361917-S | 698.5  | 1724.8 | 737.1  | LEPRE1     | <a href="#">NM_022356.2</a> | GROS1                          |            |             |              |
| GI_21361921-S | 80.3   | 86.9   | 83.6   | SAMSN1     | <a href="#">NM_022136.2</a> | HACS1                          |            |             |              |
| GI_21361926-S | 247.7  | 295.4  | 252.4  | C6orf31    | <a href="#">NM_030651.2</a> | NG5                            |            | integral to |              |
| GI_21361928-S | 1405.4 | 1359.5 | 1104.5 | SLC38A1    | <a href="#">NM_030674.2</a> | ATA1;NAT2;SAT1;SNAT1           | amino      | membran     | amino        |
| GI_21361930-S | 108.5  | 132.6  | 110.2  | C6orf148   | <a href="#">NM_030568.2</a> | MGC10818;ba257K9.4             |            |             |              |
| GI_21361932-S | 94     | 101.5  | 93.2   | CDA08      | <a href="#">NM_030790.2</a> | TIP                            |            |             |              |
| GI_21361936-S | 1787.9 | 1775.1 | 1646.9 | MGC10772   | <a href="#">NM_030567.2</a> |                                |            |             |              |
| GI_21361938-S | 315.4  | 404.3  | 337.9  | SLC19A3    | <a href="#">NM_025243.2</a> |                                | folic acid | integral to | transport    |
| GI_21361941-S | 694.9  | 764.7  | 533.6  | MGC11335   | <a href="#">NM_030819.2</a> |                                | oxidoredu  |             | electron     |
| GI_21361945-S | 128.9  | 143.7  | 137.4  | TNKS2      | <a href="#">NM_025235.2</a> | TNKL;TANK2                     | NAD ADP-   | telomere    | telomeras    |
| GI_21361946-S | 112.7  | 125.9  | 111.7  | STMN4      | <a href="#">NM_030795.2</a> | RB3                            |            | kinesin     | intracellula |
| GI_21361948-S | 226.5  | 281    | 251.9  | C19orf27   | <a href="#">NM_031213.2</a> | MGC5244                        | catalytic  | membran     | transport    |
| GI_21361950-S | 275.4  | 343.3  | 291.9  | PRO2730    | <a href="#">NM_025222.2</a> |                                |            |             |              |
| GI_21361953-S | 222.9  | 206.4  | 171.7  | DKFZP564A0 | <a href="#">NM_030954.2</a> |                                |            |             |              |
| GI_21361958-S | 338.3  | 407.3  | 347.7  | SLC35F5    | <a href="#">NM_025181.2</a> | FLJ22004                       |            |             |              |
| GI_21361962-S | 532.6  | 470.7  | 382.6  | PNAS-131   | <a href="#">NM_031446.2</a> | PNAS-124                       |            |             |              |
| GI_21361964-S | 228.4  | 266.4  | 236.1  | FLJ22944   | <a href="#">NM_025145.2</a> | FLJ36006                       |            |             |              |
| GI_21361968-S | 297.2  | 184.9  | 214.6  | LAK        | <a href="#">NM_025144.2</a> | FLJ22670;KIAA1527              |            |             |              |
| GI_21361976-A | 109.8  | 119.5  | 114.2  | TRPM3      | <a href="#">NM_024971.2</a> | MLSN2;LTRPC3;FLJ11726;KIAA1616 |            |             |              |
| GI_21361976-I | 91.7   | 113.9  | 100.1  | TRPM3      | <a href="#">NM_024971.2</a> | MLSN2;LTRPC3;FLJ11726;KIAA1616 |            |             |              |

|               |        |        |        |          |                             |                                 |             |              |             |
|---------------|--------|--------|--------|----------|-----------------------------|---------------------------------|-------------|--------------|-------------|
| GI_21361978-S | 580.2  | 595.9  | 333.3  | BOMB     | <a href="#">NM_024949.2</a> | FLJ22029                        |             |              |             |
| GI_21361980-S | 98.6   | 112.6  | 116.2  | FLJ11467 | <a href="#">NM_024963.2</a> |                                 |             |              |             |
| GI_21361986-A | 118.4  | 139.3  | 134.6  | ARG99    | <a href="#">NM_031920.2</a> |                                 |             |              |             |
| GI_21361986-I | 116.3  | 130.1  | 108.8  | ARG99    | <a href="#">NM_031920.2</a> |                                 |             |              |             |
| GI_21361994-S | 386.1  | 485.1  | 482    | ADCK4    | <a href="#">NM_024876.2</a> | FLJ12229                        |             |              |             |
| GI_21361999-S | 184.5  | 228    | 186    | TNIP3    | <a href="#">NM_024873.2</a> | LIND;FLJ21162                   |             |              |             |
| GI_21362001-S | 145.7  | 185.3  | 145.5  | FLJ13840 | <a href="#">NM_024746.2</a> |                                 |             |              |             |
| GI_21362002-S | 369.5  | 397.4  | 374.2  | FLJ13590 | <a href="#">NM_024840.2</a> |                                 |             |              |             |
| GI_21362004-S | 397.9  | 367.5  | 291.9  | MGC15419 | <a href="#">NM_024735.2</a> | MGC9527;FLJ22477;DKFZP434B027   |             |              |             |
| GI_21362006-S | 131.2  | 135    | 124.5  | B29      | <a href="#">NM_031939.2</a> |                                 |             |              |             |
| GI_21362011-S | 467.2  | 458.7  | 407.5  | FLJ22625 | <a href="#">NM_024715.2</a> |                                 | electron    |              | electron    |
| GI_21362013-S | 143.5  | 127.7  | 127.8  | FLJ22344 | <a href="#">NM_024717.2</a> |                                 |             |              |             |
| GI_21362021-S | 791.1  | 710.5  | 508.4  | FLJ23233 | <a href="#">NM_024691.2</a> |                                 |             |              |             |
| GI_21362023-S | 596.2  | 654.7  | 610.7  | FLJ12436 | <a href="#">NM_024661.2</a> |                                 |             |              |             |
| GI_21362025-S | 104.6  | 99.9   | 107.1  | FLJ22938 | <a href="#">NM_024676.2</a> |                                 |             |              |             |
| GI_21362027-S | 955.3  | 1131.9 | 631    | ZCWCC2   | <a href="#">NM_024657.2</a> | FLJ11565                        |             |              |             |
| GI_21362039-S | 96.6   | 97.4   | 96.2   | RIC3     | <a href="#">NM_024557.2</a> | FLJ11608                        |             |              |             |
| GI_21362043-S | 2865.8 | 3228.1 | 3994.8 | C9orf89  | <a href="#">NM_032310.2</a> | MGC11115;bA370F5.1              |             |              |             |
| GI_21362045-S | 847.9  | 625.1  | 679.7  | C13orf7  | <a href="#">NM_024546.2</a> | FLJ13449                        |             |              |             |
| GI_21362049-S | 482.2  | 496.8  | 582.7  | MGC12981 | <a href="#">NM_032357.2</a> |                                 |             |              |             |
| GI_21362051-I | 94.5   | 107.6  | 91.5   | CHST5    | <a href="#">NM_024533.2</a> | FLJ22167                        | sulfotransf | integral to  | protein     |
| GI_21362053-S | 415.1  | 563.8  | 570.4  | MGC4368  | <a href="#">NM_024510.2</a> |                                 |             |              |             |
| GI_21362055-S | 101.4  | 114.6  | 124    | AFURS1   | <a href="#">NM_024524.2</a> |                                 | magnesi     | integral to  | cation      |
| GI_21362059-S | 607.7  | 544.1  | 453.4  | MGC13114 | <a href="#">NM_032366.2</a> |                                 | DNA         | nucleus      | regulation  |
| GI_21362065-S | 132    | 143.4  | 147.7  | MGC3329  | <a href="#">NM_024086.2</a> |                                 |             |              |             |
| GI_21362069-S | 1026.5 | 1104.8 | 1053.9 | C7orf26  | <a href="#">NM_024067.2</a> | MGC2718                         |             |              |             |
| GI_21362071-S | 148.7  | 179.4  | 164    | C22orf23 | <a href="#">NM_032561.2</a> | EVG1;FLJ32787                   | molecular   | cellular_co  | biological_ |
| GI_21362077-S | 116    | 115.9  | 133.1  | FLJ12644 | <a href="#">NM_023074.2</a> |                                 | nucleic     | intracellula | regulation  |
| GI_21362081-S | 106.5  | 113    | 105.3  | NYD-SP20 | <a href="#">NM_032598.2</a> |                                 |             |              |             |
| GI_21362082-S | 373.7  | 368.7  | 314.5  | ANKRA2   | <a href="#">NM_023039.2</a> | ANKRA                           | low-        | membran      | biological_ |
| GI_21362085-S | 235.4  | 227.4  | 211.3  | FLJ12572 | <a href="#">NM_022905.2</a> | FLJ12939                        |             |              |             |
| GI_21362087-S | 561.2  | 523.7  | 604.4  | FLJ13912 | <a href="#">NM_022770.2</a> |                                 |             |              |             |
| GI_21362093-S | 464    | 453.1  | 534.3  | FLJ12484 | <a href="#">NM_022767.2</a> | FLJ12562                        |             |              |             |
| GI_21362095-S | 4703.7 | 3955.4 | 2300.8 | C20orf81 | <a href="#">NM_022760.3</a> | FLJ22376;bA12M19.1;DKFZp547L054 |             |              |             |
| GI_21362099-S | 182.9  | 279.8  | 234.2  | ELOVL4   | <a href="#">NM_022726.2</a> | ADMD;STGD2;STGD3                | G-protein   | endoplas     | vision      |
| GI_21362100-S | 373.1  | 284.5  | 251.4  | SMURF2   | <a href="#">NM_022739.2</a> |                                 | ubiquitin-  | nucleus      | ubiquitin   |
| GI_21362101-S | 311.6  | 389.9  | 346.7  | FLJ13576 | <a href="#">NM_022484.2</a> |                                 |             |              |             |
| GI_21362103-S | 3504.4 | 5262.8 | 4036.8 | TXNL5    | <a href="#">NM_032731.2</a> | TRP14;MGC14353                  | electron    |              | electron    |
| GI_21362104-S | 177.8  | 210.9  | 197.6  | FLJ12587 | <a href="#">NM_022480.2</a> |                                 | protein     |              |             |
| GI_21362109-S | 280.5  | 308.2  | 274.5  | TPK1     | <a href="#">NM_022445.2</a> | HTPK1                           | thiamin     |              | thiamin     |
| GI_21362111-S | 1194   | 1149.5 | 739.7  | C7orf2   | <a href="#">NM_022458.2</a> | ACHP;LMBR1;FLJ11665             |             |              |             |
| GI_21389306-S | 124.5  | 143.4  | 122.8  | FLJ32312 | <a href="#">NM_144709.1</a> |                                 |             |              |             |
| GI_21389314-S | 896.1  | 976.2  | 842.8  | SLC25A1  | <a href="#">NM_005984.1</a> | CTP;SLC20A3                     | sodium:di   | mitochond    | mitochond   |
| GI_21389332-S | 223.7  | 246    | 218.4  | FLJ32334 | <a href="#">NM_144565.1</a> |                                 |             |              |             |

|               |        |        |        |           |                             |                        |            |                          |
|---------------|--------|--------|--------|-----------|-----------------------------|------------------------|------------|--------------------------|
| GI_21389334-S | 1696.2 | 1393.8 | 2270.4 | C14orf9   | <a href="#">NM_144568.1</a> | MGC26684;DKFZp434M0519 |            | integral to              |
| GI_21389336-S | 969.4  | 660    | 711.8  | RPIA      | <a href="#">NM_144563.1</a> | RPI                    | ribose-5-  | intracellula pentose-    |
| GI_21389338-S | 212.9  | 221.5  | 211.3  | NEXN      | <a href="#">NM_144573.1</a> | NELIN;nexilin          |            |                          |
| GI_21389342-S | 108.1  | 111.1  | 89.1   | CAPN13    | <a href="#">NM_144575.1</a> |                        | calpain    | intracellula proteolysis |
| GI_21389346-S | 282.5  | 349.9  | 298    | FLJ32926  | <a href="#">NM_144577.1</a> |                        |            |                          |
| GI_21389350-S | 139.2  | 174.5  | 222.5  | SFXN5     | <a href="#">NM_144579.1</a> | BBG-TCC                | cation     | membran cation           |
| GI_21389358-S | 94.4   | 93.9   | 88.5   | FLJ30525  | <a href="#">NM_144584.1</a> |                        |            |                          |
| GI_21389360-S | 774.8  | 647.6  | 404.9  | FLJ25436  | <a href="#">NM_144581.1</a> |                        |            |                          |
| GI_21389364-S | 112.4  | 128.5  | 118.7  | ATP6V1C2  | <a href="#">NM_144583.1</a> | VMA5;ATP6C2            | hydrogen-  | proton                   |
| GI_21389370-S | 331.8  | 322.8  | 342.3  | MGC22805  | <a href="#">NM_144590.1</a> |                        |            |                          |
| GI_21389372-S | 137.2  | 152.1  | 117.9  | C10orf87  | <a href="#">NM_144587.1</a> | FLJ25359               |            |                          |
| GI_21389374-A | 107.5  | 107.9  | 117.2  | C10orf6   | <a href="#">NM_144592.1</a> | FLJ10512;FLJ25012      |            |                          |
| GI_21389374-I | 160.7  | 187.1  | 167    | C10orf6   | <a href="#">NM_144592.1</a> | FLJ10512;FLJ25012      |            |                          |
| GI_21389378-S | 99.5   | 95.6   | 101.9  | FLJ32942  | <a href="#">NM_144594.1</a> |                        |            |                          |
| GI_21389380-S | 550.7  | 514.6  | 466.9  | C10orf32  | <a href="#">NM_144591.1</a> | FLJ40752;MGC27171      |            |                          |
| GI_21389382-I | 86.1   | 88     | 81.1   | TTC8      | <a href="#">NM_144596.1</a> | BBS8                   |            |                          |
| GI_21389384-S | 247.7  | 238.4  | 212.2  | RHEBL1    | <a href="#">NM_144593.1</a> | FLJ25797;MGC34869      | small      | small                    |
| GI_21389390-S | 1462.8 | 1165.3 | 1061.9 | FLJ31153  | <a href="#">NM_144600.1</a> |                        |            |                          |
| GI_21389392-S | 427.4  | 385.3  | 389.8  | MGC29937  | <a href="#">NM_144597.1</a> |                        |            |                          |
| GI_21389406-S | 462.3  | 536.2  | 513.8  | FLJ32384  | <a href="#">NM_144608.1</a> |                        |            |                          |
| GI_21389408-S | 145.6  | 168    | 153.8  | FLJ25410  | <a href="#">NM_144605.1</a> |                        | GTP        | cell cycle               |
| GI_21389410-S | 105.9  | 114.7  | 104.3  | FLJ25006  | <a href="#">NM_144610.1</a> |                        | copper ion | electron                 |
| GI_21389416-S | 734.3  | 917.9  | 528    | FLJ31795  | <a href="#">NM_144609.1</a> |                        |            |                          |
| GI_21389426-S | 1273.1 | 1524   | 1363.2 | MGC29891  | <a href="#">NM_144618.1</a> |                        |            |                          |
| GI_21389428-S | 145.2  | 159.3  | 153.5  | MGC23244  | <a href="#">NM_144615.1</a> |                        | DNA        | nucleus regulation       |
| GI_21389430-S | 96.4   | 129.8  | 112.7  | MGC14816  | <a href="#">NM_144620.1</a> |                        |            |                          |
| GI_21389432-S | 213.6  | 255.8  | 209.1  | FLJ32389  | <a href="#">NM_144617.1</a> |                        | heat       |                          |
| GI_21389434-S | 177.9  | 200.2  | 162.5  | FLJ32934  | <a href="#">NM_144622.1</a> |                        |            |                          |
| GI_21389438-A | 167.8  | 198.1  | 193.4  | KIS       | <a href="#">NM_144624.1</a> |                        | cAMP-      | cytoplasm peptidyl-      |
| GI_21389442-S | 94     | 110.2  | 107.3  | MGC17299  | <a href="#">NM_144626.1</a> |                        |            |                          |
| GI_21389444-S | 101.7  | 108    | 93.9   | FLJ32784  | <a href="#">NM_144623.1</a> |                        |            |                          |
| GI_21389446-S | 657.4  | 531.3  | 279.8  | C20orf140 | <a href="#">NM_144628.1</a> | dJ852M4.2              |            | integral to              |
| GI_21389448-S | 102.4  | 94.3   | 87.6   | FLJ32978  | <a href="#">NM_144625.1</a> |                        |            |                          |
| GI_21389452-S | 181.7  | 208.6  | 210.4  | SSTK-IP   | <a href="#">NM_144627.1</a> | MGC26877               |            |                          |
| GI_21389456-S | 259.4  | 332.8  | 277.9  | C2orf11   | <a href="#">NM_144629.1</a> | FLJ30574               |            |                          |
| GI_21389466-S | 152.6  | 174.9  | 156.5  | FLJ31300  | <a href="#">NM_144639.1</a> |                        | lyase      | histidine                |
| GI_21389468-S | 2111.1 | 1702   | 1672   | CHCHD4    | <a href="#">NM_144636.1</a> | FLJ31709               |            |                          |
| GI_21389470-S | 729.7  | 755.2  | 556.9  | FLJ32332  | <a href="#">NM_144641.1</a> | PP2C{eta}              |            |                          |
| GI_21389472-S | 252.9  | 526.1  | 454.7  | MGC29956  | <a href="#">NM_144638.1</a> |                        |            |                          |
| GI_21389474-S | 154.9  | 141.3  | 145.6  | FLJ30655  | <a href="#">NM_144643.1</a> |                        |            |                          |
| GI_21389478-S | 98.4   | 100.7  | 100.7  | MGC26744  | <a href="#">NM_144645.1</a> |                        |            |                          |
| GI_21389482-S | 112.6  | 122.9  | 119.6  | FLJ32786  | <a href="#">NM_144648.1</a> |                        |            |                          |
| GI_21389490-S | 102.2  | 91     | 87.5   | FLJ32954  | <a href="#">NM_144713.1</a> |                        |            |                          |
| GI_21389492-S | 112.2  | 118    | 104.2  | FLJ25449  | <a href="#">NM_144714.1</a> |                        | catalytic  |                          |

|               |        |        |        |           |                             |                              |             |                       |
|---------------|--------|--------|--------|-----------|-----------------------------|------------------------------|-------------|-----------------------|
| GI_21389496-S | 867.9  | 854.7  | 887.8  | MGC23918  | <a href="#">NM_144716.1</a> |                              |             |                       |
| GI_21389502-S | 143.8  | 158.1  | 157.1  | FLJ25467  | <a href="#">NM_144719.1</a> |                              |             |                       |
| GI_21389504-S | 86     | 84.1   | 74.9   | MARLIN1   | <a href="#">NM_144720.1</a> | FLJ31564                     |             |                       |
| GI_21389510-S | 871.8  | 864.7  | 978.3  | FLJ31121  | <a href="#">NM_144723.1</a> |                              | RNA         | nucleus               |
| GI_21389514-S | 972.1  | 1497.9 | 1027.7 | FLJ31951  | <a href="#">NM_144726.1</a> |                              |             |                       |
| GI_21389516-S | 104.2  | 108.8  | 93.6   | CRYGN     | <a href="#">NM_144727.1</a> |                              |             |                       |
| GI_21389518-S | 183    | 189.9  | 161.7  | ADHFE1    | <a href="#">NM_144650.1</a> | ADH8;FLJ32430                | iron ion    | metabolis             |
| GI_21389522-S | 592.9  | 377    | 268.7  | FLJ25409  | <a href="#">NM_144652.1</a> |                              |             |                       |
| GI_21389524-S | 716.9  | 398.3  | 452.9  | FLJ33069  | <a href="#">NM_144649.1</a> |                              |             |                       |
| GI_21389526-S | 616.7  | 857.3  | 788.1  | MGC29761  | <a href="#">NM_144654.1</a> |                              |             |                       |
| GI_21389528-S | 164.9  | 132.9  | 158.7  | FLJ25471  | <a href="#">NM_144651.1</a> |                              | peroxidase  | nucleus peroxidase    |
| GI_21389534-S | 275.3  | 290.8  | 235.2  | TCP10L    | <a href="#">NM_144659.1</a> | PRED77                       |             | kinesin               |
| GI_21389542-S | 406.3  | 425.5  | 363.3  | 1-Nov     | <a href="#">NM_144663.1</a> |                              |             |                       |
| GI_21389544-S | 100.9  | 95.7   | 94     | SAMD8     | <a href="#">NM_144660.1</a> | FLJ25082                     |             |                       |
| GI_21389548-S | 92.4   | 97.3   | 93.1   | MGC26605  | <a href="#">NM_144662.1</a> |                              | peptidase   | cytosol ubiquitin-    |
| GI_21389550-S | 135    | 159.2  | 133.5  | FLJ32894  | <a href="#">NM_144667.1</a> |                              |             |                       |
| GI_21389554-S | 353.7  | 420.1  | 261.3  | FLJ32752  | <a href="#">NM_144666.1</a> |                              |             |                       |
| GI_21389558-S | 207.5  | 277.6  | 235.9  | FLJ31978  | <a href="#">NM_144669.1</a> |                              |             | biosynthes            |
| GI_21389560-S | 114.1  | 119.6  | 112.6  | FLJ25179  | <a href="#">NM_144670.1</a> |                              | endopepti   |                       |
| GI_21389568-S | 129.4  | 154.6  | 116.1  | FLJ32871  | <a href="#">NM_144674.1</a> |                              |             | microtubul microtubul |
| GI_21389570-S | 98.4   | 113.6  | 105.9  | MGC18079  | <a href="#">NM_144675.1</a> |                              |             |                       |
| GI_21389572-S | 93.8   | 99.4   | 85     | MGC23911  | <a href="#">NM_144676.1</a> |                              | protein     | membran intracellula  |
| GI_21389576-S | 968.1  | 894.8  | 1072.3 | FLJ31528  | <a href="#">NM_144679.1</a> |                              |             |                       |
| GI_21389578-S | 91.4   | 94.5   | 89     | FLJ32734  | <a href="#">NM_144681.1</a> |                              |             |                       |
| GI_21389584-S | 311.1  | 318.5  | 287.7  | MGC32104  | <a href="#">NM_144684.1</a> |                              | nucleic     | nucleus regulation    |
| GI_21389588-S | 475.9  | 476    | 410    | TMC4      | <a href="#">NM_144686.1</a> | MGC39329                     |             |                       |
| GI_21389592-S | 99.7   | 108.7  | 99.1   | ZNF582    | <a href="#">NM_144690.1</a> | FLJ30927                     | nucleic     | nucleus regulation    |
| GI_21389596-S | 276.2  | 342.8  | 337.5  | LOC148137 | <a href="#">NM_144692.1</a> |                              |             |                       |
| GI_21389598-S | 107.9  | 112.6  | 137    | ZNF570    | <a href="#">NM_144694.1</a> | FLJ30791                     | nucleic     | nucleus regulation    |
| GI_21389600-S | 143.4  | 148.2  | 142.3  | FLJ32421  | <a href="#">NM_144695.1</a> |                              |             |                       |
| GI_21389608-S | 115.1  | 119.6  | 131    | C20orf40  | <a href="#">NM_144703.1</a> | FT005;FLJ25473;ba11M20.3     |             |                       |
| GI_21389614-S | 113.1  | 116.1  | 106.2  | FLJ32884  | <a href="#">NM_144702.1</a> |                              |             |                       |
| GI_21389616-S | 101.8  | 121.6  | 98.7   | FLJ30473  | <a href="#">NM_144704.1</a> |                              | disulfide   | electron              |
| GI_21389622-S | 118.1  | 155.3  | 133    | PROM2     | <a href="#">NM_144707.1</a> | PROM-2                       |             |                       |
| GI_21396476-A | 94.8   | 99.2   | 86.2   | MEOX1     | <a href="#">NM_013999.2</a> | MOX1                         |             | developm              |
| GI_21396477-I | 123.1  | 107.9  | 104    | MEOX1     | <a href="#">NM_004527.2</a> | MOX1                         |             | developm              |
| GI_21396478-S | 131.3  | 155.5  | 145.5  | MEOX2     | <a href="#">NM_005924.2</a> | GAX;MOX2                     | transcripti | nucleus circulation   |
| GI_21396479-A | 1392   | 1501   | 1762.2 | RALY      | <a href="#">NM_007367.2</a> | P542                         | heterogen   | ribonucleo            |
| GI_21396481-S | 375.2  | 606.7  | 389    | HIST1H2AC | <a href="#">NM_003512.3</a> | H2A/I;H2AFL;dJ221C16.4       | DNA         | chromoso nucleoso     |
| GI_21396482-S | 158.7  | 192.3  | 172.7  | HIST1H2BF | <a href="#">NM_003522.3</a> | H2B/g;H2BFG                  |             |                       |
| GI_21396483-S | 544.9  | 792.2  | 601.1  | HIST1H2BE | <a href="#">NM_003523.2</a> | H2B.h;H2B/h;H2BFH;dJ221C16.8 | DNA         | chromoso nucleoso     |
| GI_21396485-I | 5287.5 | 6005.5 | 5399.3 | PRO1853   | <a href="#">NM_018607.4</a> |                              |             |                       |
| GI_21396488-S | 1195.5 | 882.4  | 881    | PRSS15    | <a href="#">NM_004793.2</a> | LON;LONP;hLON;LonHS;MGC1498  | ATP-        | mitochond proteolysis |
| GI_21396490-S | 112.6  | 109.6  | 106.2  | PRSS16    | <a href="#">NM_005865.2</a> | TSSP                         | serine-     | cellular_co protein   |

|               |        |        |        |           |                             |                             |           |             |             |
|---------------|--------|--------|--------|-----------|-----------------------------|-----------------------------|-----------|-------------|-------------|
| GI_21396492-A | 849.6  | 837.3  | 943.2  | OCRL      | <a href="#">NM_001587.3</a> | LOCR;OCRL1;INPP5F           | phosphoin | Golgi       | lipid       |
| GI_21396495-I | 282.6  | 349.3  | 324.1  | OGG1      | <a href="#">NM_016819.2</a> | HMMH;MUTM;OGH1;HOGG1        | purine-   | nucleoplas  | base-       |
| GI_21396497-S | 90.8   | 94.4   | 78.7   | HIST1H3F  | <a href="#">NM_021018.2</a> | H3/i;H3FI                   |           |             |             |
| GI_21396498-S | 105.4  | 101.3  | 104.2  | HIST1H3B  | <a href="#">NM_003537.3</a> | H3/l;H3FL                   |           |             |             |
| GI_21396499-S | 341.9  | 284.5  | 294    | HIRIP3    | <a href="#">NM_003609.2</a> |                             |           | nucleus     | chromatin   |
| GI_21396501-S | 102.5  | 81     | 85.9   | ELSPBP1   | <a href="#">NM_022142.3</a> | E12;HE12                    |           |             |             |
| GI_21396502-S | 90.1   | 93.9   | 127.2  | EPHB1     | <a href="#">NM_004441.2</a> | ELK;NET;Hek6;EPHT2          | transmem  | integral to | signal      |
| GI_21426826-S | 695.1  | 800.3  | 802.4  | APOA1BP   | <a href="#">NM_144772.1</a> | AIBP                        | molecular |             |             |
| GI_21426832-S | 113.3  | 110.3  | 96.9   | RBM11     | <a href="#">NM_144770.1</a> |                             |           |             |             |
| GI_21426842-S | 114.7  | 124.1  | 113.4  | SMCR5     | <a href="#">NM_144774.1</a> |                             |           |             |             |
| GI_21426844-S | 143.8  | 154.7  | 145.9  | SMCR8     | <a href="#">NM_144775.1</a> |                             |           |             |             |
| GI_21450642-S | 256.4  | 342.3  | 291.8  | FLJ23790  | <a href="#">NM_144963.1</a> |                             | globin    |             | oxygen      |
| GI_21450644-S | 97.9   | 107.2  | 110.5  | TTC16     | <a href="#">NM_144965.1</a> | FLJ32780                    |           |             |             |
| GI_21450646-S | 144.9  | 168.2  | 148.6  | MGC22776  | <a href="#">NM_144962.1</a> |                             |           |             |             |
| GI_21450650-S | 188.2  | 176.2  | 172.4  | RG9MTD3   | <a href="#">NM_144964.1</a> | FLJ31455;bA3J10.9           | calcium   |             |             |
| GI_21450652-S | 79.6   | 88.9   | 83.6   | ZDHHC15   | <a href="#">NM_144969.1</a> | FLJ31812                    | zinc ion  | integral to | regulation  |
| GI_21450654-S | 115.8  | 110.3  | 95.5   | FLJ25461  | <a href="#">NM_144966.1</a> |                             | peptidase | membran     | proteolysis |
| GI_21450656-S | 85.8   | 87.5   | 82.8   | MGC23940  | <a href="#">NM_144972.1</a> |                             | L-lactate |             | glycolysis  |
| GI_21450658-S | 155.7  | 167.1  | 174.1  | FLJ32783  | <a href="#">NM_144968.1</a> |                             |           |             |             |
| GI_21450662-S | 224.3  | 302.8  | 310.9  | MGC39350  | <a href="#">NM_144970.1</a> |                             |           |             |             |
| GI_21450664-S | 449.8  | 384.6  | 427.1  | FLJ32745  | <a href="#">NM_144978.1</a> |                             |           |             |             |
| GI_21450668-S | 93     | 93     | 80.7   | C6orf118  | <a href="#">NM_144980.1</a> | MGC23884;bA85G2.1           |           |             |             |
| GI_21450670-S | 117.4  | 117.5  | 118.1  | FAM31B    | <a href="#">NM_144977.1</a> | MGC27044                    |           |             |             |
| GI_21450676-S | 134    | 144.8  | 124.8  | C10orf72  | <a href="#">NM_144984.1</a> | FLJ31737                    |           |             |             |
| GI_21450678-S | 255.2  | 266.6  | 228.3  | FLJ25059  | <a href="#">NM_144981.1</a> |                             | serine-   | membran     | proteolysis |
| GI_21450688-S | 99.7   | 108.9  | 95.7   | FLJ23878  | <a href="#">NM_144990.1</a> |                             |           |             |             |
| GI_21450690-S | 843.9  | 936.1  | 842    | U2AF1L3   | <a href="#">NM_144987.1</a> | MGC33901;U2AF1RS3;U2AF1-RS3 | nucleic   | nucleus     |             |
| GI_21450708-S | 119.6  | 114.7  | 119.4  | MGC22688  | <a href="#">NM_145001.1</a> |                             | ATP       |             | protein     |
| GI_21450710-S | 1516.1 | 1359.4 | 1417.3 | STRA13    | <a href="#">NM_144998.1</a> | MGC14480                    |           |             |             |
| GI_21450718-S | 145    | 156.3  | 174.8  | FLJ31164  | <a href="#">NM_145003.1</a> |                             |           |             |             |
| GI_21450724-S | 112.3  | 104.8  | 95.2   | NALP11    | <a href="#">NM_145007.1</a> | NOD17;PYPAF6                | ATP       |             |             |
| GI_21450726-S | 125.8  | 141.7  | 151    | FLJ30213  | <a href="#">NM_145008.1</a> |                             |           |             |             |
| GI_21450728-S | 98.1   | 85     | 86     | MGC35558  | <a href="#">NM_145013.1</a> |                             |           |             |             |
| GI_21450730-S | 310.2  | 228.8  | 276.2  | FLJ32915  | <a href="#">NM_145014.1</a> |                             |           |             |             |
| GI_21450742-S | 168.4  | 188.8  | 167.4  | FLJ32771  | <a href="#">NM_145017.1</a> |                             |           |             |             |
| GI_21450744-S | 166.4  | 169.4  | 158.8  | C10orf25  | <a href="#">NM_145022.1</a> | FLJ30567                    |           |             |             |
| GI_21450748-S | 206.9  | 243.1  | 213.4  | FLJ31547  | <a href="#">NM_145024.1</a> |                             | hydrolase |             |             |
| GI_21450760-S | 2019.3 | 1530.9 | 1422.2 | MGC22793  | <a href="#">NM_145030.1</a> |                             |           |             |             |
| GI_21450764-S | 97.5   | 101.2  | 102.2  | C21orf100 | <a href="#">NM_145033.1</a> |                             |           |             |             |
| GI_21450766-S | 662.2  | 652.1  | 795.4  | C6orf136  | <a href="#">NM_145029.1</a> | MGC15854                    |           |             |             |
| GI_21450774-S | 294.6  | 412.7  | 336.4  | LOC163590 | <a href="#">NM_145034.1</a> |                             |           |             |             |
| GI_21450776-S | 98.6   | 118.1  | 88.1   | MGC16372  | <a href="#">NM_145038.1</a> | FLJ32660                    |           |             |             |
| GI_21450778-S | 111.5  | 106.7  | 110.6  | MGC33887  | <a href="#">NM_145036.1</a> |                             |           |             |             |
| GI_21450780-S | 168.3  | 230.7  | 184.2  | MGC15606  | <a href="#">NM_145037.1</a> | FLJ30102                    |           |             |             |

|               |        |        |        |          |                             |                                    |             |              |              |
|---------------|--------|--------|--------|----------|-----------------------------|------------------------------------|-------------|--------------|--------------|
| GI_21450786-S | 237.3  | 249    | 236.8  | PRKCDBP  | <a href="#">NM_145040.1</a> | SRBC;HSRBC                         |             |              |              |
| GI_21450791-S | 262.9  | 301.6  | 294.8  | MGC16385 | <a href="#">NM_145039.1</a> | FLJ23771;FLJ31569                  |             |              |              |
| GI_21450795-S | 175.7  | 194.1  | 165.8  | MGC20235 | <a href="#">NM_145041.1</a> |                                    |             |              |              |
| GI_21450799-S | 416.6  | 356.6  | 376.9  | NEIL2    | <a href="#">NM_145043.1</a> | NEH2;MGC2832;MGC4505;FLJ31644      | DNA         | nucleus      | DNA          |
| GI_21450801-S | 1775.3 | 1764.6 | 1204.6 | MGC10067 | <a href="#">NM_145049.1</a> | FLJ25267                           | peptidase   |              |              |
| GI_21450811-S | 166.6  | 193.2  | 187.7  | MGC27434 | <a href="#">NM_145050.1</a> |                                    |             |              |              |
| GI_21450813-S | 135.7  | 182.7  | 156.6  | MGC12909 | <a href="#">NM_145055.1</a> |                                    |             |              |              |
| GI_21450815-S | 403.4  | 495.3  | 410.2  | MGC23937 | <a href="#">NM_145052.1</a> |                                    |             |              |              |
| GI_21450821-S | 189.3  | 220.6  | 238.8  | FUK      | <a href="#">NM_145059.1</a> |                                    | ATP         | cytoplasm    | metabolis    |
| GI_21450823-S | 296.1  | 361    | 295.4  | MGC15476 | <a href="#">NM_145056.1</a> |                                    |             |              |              |
| GI_21450827-S | 542.7  | 621.3  | 503.2  | MGC7036  | <a href="#">NM_145058.1</a> | FLJ30380;FLJ32372                  |             |              |              |
| GI_21450831-S | 903.2  | 574.9  | 801.9  | MGC10200 | <a href="#">NM_145060.1</a> |                                    |             |              |              |
| GI_21450833-S | 140.3  | 139.7  | 126.9  | MGC35521 | <a href="#">NM_145065.1</a> |                                    |             |              |              |
| GI_21450835-S | 370    | 367.4  | 346.1  | C6orf113 | <a href="#">NM_145062.1</a> | dJ41217.3                          |             |              |              |
| GI_21450837-S | 117.6  | 117.8  | 118    | MGC2793  | <a href="#">NM_145064.1</a> |                                    |             |              | intracellula |
| GI_21450841-I | 97.8   | 85.6   | 86.9   | MATK     | <a href="#">NM_002378.2</a> | CHK;CTK;HYL;Lsk;HYLTK;HHYLTK;MGC17 | protein-    | soluble      | mesoderm     |
| GI_21450843-A | 122.9  | 124.3  | 117.7  | MATK     | <a href="#">NM_139354.1</a> | CHK;CTK;HYL;Lsk;HYLTK;HHYLTK;MGC17 | protein-    | soluble      | mesoderm     |
| GI_21450845-I | 170.4  | 203.4  | 178.4  | MATK     | <a href="#">NM_139355.1</a> | CHK;CTK;HYL;Lsk;HYLTK;HHYLTK;MGC17 | protein-    | soluble      | mesoderm     |
| GI_21450847-A | 288.1  | 282.8  | 230.9  | ATRN     | <a href="#">NM_012070.2</a> | MGCA;DPPT-L;KIAA0548               | receptor    | extracellul  | developm     |
| GI_21450849-S | 103.4  | 96     | 94.2   | OR12D2   | <a href="#">NM_013936.2</a> | hs6M1-20;dJ994E9.8                 | olfactory   | integral to  | olfaction    |
| GI_21450851-A | 645.5  | 790.2  | 913.4  | OSBPL2   | <a href="#">NM_014835.2</a> | ORP2;ORP-                          |             |              | lipid        |
| GI_21450854-I | 145.5  | 166.2  | 143.4  | STARD7   | <a href="#">NM_020151.2</a> | GTT1                               |             |              |              |
| GI_21450855-A | 4194.6 | 3974.4 | 4677.8 | STARD7   | <a href="#">NM_139267.1</a> | GTT1                               |             |              |              |
| GI_21450857-S | 149.5  | 152.3  | 142.6  | TRIM36   | <a href="#">NM_018700.2</a> | RNF98;RBC728                       | zinc ion    | intracellula |              |
| GI_21450858-S | 103.8  | 106.7  | 93.4   | TRPM1    | <a href="#">NM_002420.3</a> | MLSN1;LTRPC1                       | calcium     | membran      | cell growth  |
| GI_21450860-I | 374.7  | 505.6  | 316.7  | ATRN     | <a href="#">NM_139321.1</a> | MGCA;DPPT-L;KIAA0548               | receptor    | extracellul  | developm     |
| GI_21464100-S | 712.8  | 998.7  | 943.6  | YWHAG    | <a href="#">NM_012479.2</a> | 14-3-3GAMMA                        | protein     |              | signal       |
| GI_21464102-S | 4446.7 | 3641.7 | 3374.4 | YWHAH    | <a href="#">NM_003405.2</a> | YWHA1                              | protein     |              | protein      |
| GI_21464103-S | 7168.2 | 7273.9 | 6972.7 | YWHAQ    | <a href="#">NM_006826.2</a> | 1C5;HS1                            | protein     |              | exocytosis   |
| GI_21464104-S | 1571.5 | 1629.1 | 1746.8 | YY1      | <a href="#">NM_003403.3</a> | DELTA;NF-E1;UCRBP;YIN-YANG-1       | transcripti | nucleus      | regulation   |
| GI_21464106-A | 265.8  | 362.7  | 270.5  | F11R     | <a href="#">NM_144501.1</a> | JAM;KAT;JAM1;JCAM;JAM-1;PAM-1      | cell        | intercellula | cell         |
| GI_21464110-I | 105.6  | 91.5   | 93.9   | F11R     | <a href="#">NM_144503.1</a> | JAM;KAT;JAM1;JCAM;JAM-1;PAM-1      | cell        | intercellula | cell         |
| GI_21464114-A | 245.7  | 247.3  | 218.7  | MBD1     | <a href="#">NM_015845.2</a> | PCM1;CXXC3                         | transcripti |              | transcripti  |
| GI_21464120-I | 279.5  | 355    | 311.1  | MBD2     | <a href="#">NM_015832.2</a> | DMTase;NY-CO-41                    | satellite   | nucleus      |              |
| GI_21464121-A | 100.8  | 101.8  | 100.8  | MBD2     | <a href="#">NM_003927.3</a> | DMTase;NY-CO-41                    | satellite   | nucleus      |              |
| GI_21464122-S | 2389.7 | 2617.7 | 2770.1 | MBD3     | <a href="#">NM_003926.5</a> |                                    | DNA         |              |              |
| GI_21464123-A | 132.5  | 157.2  | 124.4  | MBNL2    | <a href="#">NM_005757.3</a> | MBLL;MBLL39;PRO2032                |             |              |              |
| GI_21464123-I | 85.8   | 88.2   | 81.4   | MBNL2    | <a href="#">NM_005757.3</a> | MBLL;MBLL39;PRO2032                |             |              |              |
| GI_21464124-I | 681.5  | 929.7  | 703.1  | MBNL2    | <a href="#">NM_144778.1</a> | MBLL;MBLL39;PRO2032                |             |              |              |
| GI_21464126-I | 111.6  | 133.9  | 122.4  | KLK8     | <a href="#">NM_144505.1</a> | NP;HNP;NRPN;PRSS19;TADG14          | serine-     |              | neurogene    |
| GI_21464130-A | 103    | 126.5  | 127.6  | KLK8     | <a href="#">NM_144507.1</a> | NP;HNP;NRPN;PRSS19;TADG14          | serine-     |              | neurogene    |
| GI_21464133-I | 128.1  | 135.8  | 129.5  | RGS3     | <a href="#">NM_144488.1</a> | C2PA;RGP3;FLJ20370;PDZ-RGS3        | GTPase      | cytosol      | regulation   |
| GI_21464138-A | 151.1  | 160.8  | 137.3  | RGS13    | <a href="#">NM_144766.1</a> | MGC17173                           | signal      |              | signal       |
| GI_21464140-I | 1128.8 | 1383.2 | 1167.4 | AKAP11   | <a href="#">NM_016248.2</a> | PRKA11;AKAP220;FLJ11304;KIAA0629   | protein     |              | protein      |



|               |        |        |        |            |                             |                                     |             |             |               |
|---------------|--------|--------|--------|------------|-----------------------------|-------------------------------------|-------------|-------------|---------------|
| GI_21464141-A | 109.2  | 123.9  | 122    | AKAP11     | <a href="#">NM_144490.1</a> | PRKA11;AKAP220;FLJ11304;KIAA0629    | protein     |             | protein       |
| GI_21464141-I | 121.8  | 135.7  | 135.6  | AKAP11     | <a href="#">NM_144490.1</a> | PRKA11;AKAP220;FLJ11304;KIAA0629    | protein     |             | protein       |
| GI_21483180-I | 222.5  | 248.7  | 230.4  | ZFP95      | <a href="#">NM_014569.2</a> | KIAA1015;MGC33710                   | zinc ion    | nucleus     | regulation    |
| GI_21483181-A | 277.6  | 306.9  | 274.3  | ZFP95      | <a href="#">NM_145102.1</a> | KIAA1015;MGC33710                   | zinc ion    | nucleus     | regulation    |
| GI_21483181-I | 91.4   | 95.5   | 98.3   | ZFP95      | <a href="#">NM_145102.1</a> | KIAA1015;MGC33710                   | zinc ion    | nucleus     | regulation    |
| GI_21493021-I | 151.1  | 174.8  | 154.8  | AKAP12     | <a href="#">NM_005100.2</a> | AKAP250                             | protein     | cytoplasm   | G-protein     |
| GI_21493023-A | 511.1  | 595.8  | 694.3  | AKAP12     | <a href="#">NM_144497.1</a> | AKAP250                             | protein     | cytoplasm   | G-protein     |
| GI_21493023-I | 102.2  | 115.1  | 106.1  | AKAP12     | <a href="#">NM_144497.1</a> | AKAP250                             | protein     | cytoplasm   | G-protein     |
| GI_21493027-A | 239.3  | 305.4  | 254.5  | AKAP1      | <a href="#">NM_003488.2</a> | AKAP;PRKA1;AKAP84;AKAP121;AKAP149;  | protein     | mitochond   |               |
| GI_21493032-S | 307.5  | 317    | 284.2  | AKAP10     | <a href="#">NM_007202.2</a> | PRKA10;D-AKAP2;MGC9414              | protein     | mitochond   | protein       |
| GI_21493034-I | 121.1  | 137.1  | 134.6  | AKAP1      | <a href="#">NM_139275.1</a> | AKAP;PRKA1;AKAP84;AKAP121;AKAP149;  | protein     | mitochond   |               |
| GI_21493036-I | 106.8  | 97.2   | 108.2  | AKAP4      | <a href="#">NM_003886.2</a> | HI;p82;FSC1;AKAP82;hAKAP82          | protein     | cytoskelet  | fertilization |
| GI_21493038-A | 176.9  | 193.7  | 183.2  | AKAP4      | <a href="#">NM_139289.1</a> | HI;p82;FSC1;AKAP82;hAKAP82          | protein     | cytoskelet  | fertilization |
| GI_21493038-I | 119    | 156.9  | 140.4  | AKAP4      | <a href="#">NM_139289.1</a> | HI;p82;FSC1;AKAP82;hAKAP82          | protein     | cytoskelet  | fertilization |
| GI_21493040-S | 107.1  | 112.5  | 113.8  | AKAP3      | <a href="#">NM_006422.2</a> | SOB1;FSP95;PRKA3;AKAP110            | protein     |             | acrosome      |
| GI_21493042-S | 85.3   | 103    | 88.9   | AKAP5      | <a href="#">NM_004857.2</a> | H21;AKAP75;AKAP79                   | protein     | plasma      | synaptic      |
| GI_21493044-S | 167.5  | 187.2  | 165.1  | AKAP6      | <a href="#">NM_004274.3</a> | ADAP6;PRKA6;mAKAP;ADAP100;AKAP100;  | protein     | nuclear     | protein       |
| GI_21493046-S | 1146.8 | 1230.6 | 1121   | AKAP8      | <a href="#">NM_005858.2</a> | AKAP95;DKFZp586B1222                | protein     | nucleus     | mitosis       |
| GI_21495177-S | 391.1  | 426    | 391.4  | DKFZp727G1 | <a href="#">NM_145111.1</a> |                                     |             |             |               |
| GI_21536251-S | 232.1  | 266.7  | 220.1  | NBEA       | <a href="#">NM_015678.2</a> | BCL8B;FLJ10197;KIAA1544             | protein     | Golgi       | post-Golgi    |
| GI_21536270-I | 360.9  | 290.1  | 120.8  | EVA1       | <a href="#">NM_005797.2</a> | EVA;MPZL2                           | cell        | cytoskelet  | homophili     |
| GI_21536273-S | 100.1  | 122.1  | 97.2   | CASQ1      | <a href="#">NM_001231.2</a> | CASQ;CALMITINE                      | calcium     | smooth      |               |
| GI_21536277-S | 240.5  | 259.2  | 253.4  | CREBL2     | <a href="#">NM_001310.2</a> |                                     | transcripti | nucleus     | transcripti   |
| GI_21536278-S | 895.4  | 833.4  | 838    | CRTAP      | <a href="#">NM_006371.2</a> | CASP                                |             | extracellul |               |
| GI_21536279-S | 94.4   | 100.8  | 90.3   | CRYBB1     | <a href="#">NM_001887.3</a> |                                     | structural  |             | vision        |
| GI_21536280-S | 99.8   | 99.1   | 109.2  | CABP5      | <a href="#">NM_019855.3</a> |                                     | calcium     | cellular_co | signal        |
| GI_21536281-S | 90.3   | 255.7  | 281.2  | CAMK1      | <a href="#">NM_003656.3</a> | CAMKI                               | calcium/ca  |             | protein       |
| GI_21536283-S | 301.7  | 367.4  | 318.4  | CHRNA7     | <a href="#">NM_000746.2</a> | NACHRA7                             | nicotinic   | nicotinic   | activation    |
| GI_21536287-S | 164.7  | 185.5  | 174    | CKM        | <a href="#">NM_001824.2</a> | CKMM;M-CK                           | creatine    |             |               |
| GI_21536289-S | 96     | 93.3   | 86.9   | COL1A2     | <a href="#">NM_000089.2</a> | OI4                                 | structural  | collagen    | skeletal      |
| GI_21536290-S | 329.1  | 366.7  | 128.1  | CSPG4      | <a href="#">NM_001897.2</a> | NG2;MCSP;MCSPG;MSK16;MEL-CSPG       | chondroiti  | proteoglyc  | oncogene      |
| GI_21536291-S | 181.8  | 208.3  | 170.6  | CUBN       | <a href="#">NM_001081.2</a> | IFCR;MGA1;gp280                     | vesicle     | membran     | vitamin       |
| GI_21536292-S | 125.2  | 156.2  | 189.5  | CLCA2      | <a href="#">NM_006536.3</a> | CaCC                                | chloride    | integral to | small         |
| GI_21536293-I | 111.9  | 120.3  | 121.6  | CLDN14     | <a href="#">NM_144492.1</a> | DFNB29                              | structural  | tight       | protein       |
| GI_21536295-A | 89.6   | 96.3   | 94.3   | CLDN14     | <a href="#">NM_012130.2</a> | DFNB29                              | structural  | tight       | protein       |
| GI_21536295-I | 891.3  | 1046.8 | 796.4  | CLDN14     | <a href="#">NM_012130.2</a> | DFNB29                              | structural  | tight       | protein       |
| GI_21536296-S | 114.3  | 140.6  | 134.6  | CLDN16     | <a href="#">NM_006580.2</a> | PCLN1                               | magnesi     | tight       | metal ion     |
| GI_21536297-S | 81.8   | 89     | 86.7   | CLDN1      | <a href="#">NM_021101.3</a> | CLD1;SEMP1                          | structural  | tight       | cell          |
| GI_21536298-S | 116.2  | 130.2  | 124.5  | CLDN3      | <a href="#">NM_001306.2</a> | RVP1;HRVP1;CPE-R2;CPETR2            | transmem    | tight       |               |
| GI_21536299-I | 1057.8 | 1666.7 | 1241.3 | STAT1      | <a href="#">NM_007315.2</a> | ISGF-3;STAT91                       | hematopoi   | cytoplasm   | tyrosine      |
| GI_21536300-A | 350.6  | 798    | 473.5  | STAT1      | <a href="#">NM_139266.1</a> | ISGF-3;STAT91                       | hematopoi   | cytoplasm   | tyrosine      |
| GI_21536300-I | 690.7  | 1461.6 | 1096.5 | STAT1      | <a href="#">NM_139266.1</a> | ISGF-3;STAT91                       | hematopoi   | cytoplasm   | tyrosine      |
| GI_21536304-S | 844.4  | 610.5  | 399.4  | SOCS2      | <a href="#">NM_003877.3</a> | CIS2;SSI2;Cish2;SSI-2;SOCS-2;STAT12 | JAK         |             | JAK-STAT      |
| GI_21536305-A | 89.4   | 84.5   | 94.9   | SCEL       | <a href="#">NM_003843.2</a> | FLJ21667;MGC22531                   |             | cytoplasm   | epidermal     |

|               |        |        |        |         |                             |                                        |            |              |             |
|---------------|--------|--------|--------|---------|-----------------------------|----------------------------------------|------------|--------------|-------------|
| GI_21536309-A | 557.3  | 647.9  | 657.5  | SEC22L3 | <a href="#">NM_032970.2</a> | SEC22C;MGC5373;MGC13261                | vesicle    | integral to  | nonselecti  |
| GI_21536309-I | 171.8  | 217.2  | 263.9  | SEC22L3 | <a href="#">NM_032970.2</a> | SEC22C;MGC5373;MGC13261                | vesicle    | integral to  | nonselecti  |
| GI_21536310-I | 847.8  | 801.5  | 1001.7 | SEC22L3 | <a href="#">NM_004206.2</a> | SEC22C;MGC5373;MGC13261                | vesicle    | integral to  | nonselecti  |
| GI_21536313-A | 78.7   | 92.3   | 87.4   | RET     | <a href="#">NM_020629.2</a> | PTC;MTC1;HSCR1;MEN2A;MEN2B;RET51;      | protein-   |              | posterior   |
| GI_21536314-I | 155.5  | 168.4  | 152    | RET     | <a href="#">NM_020630.2</a> | PTC;MTC1;HSCR1;MEN2A;MEN2B;RET51;      | protein-   |              | posterior   |
| GI_21536317-S | 2079.1 | 1576.6 | 1571.9 | DPF2    | <a href="#">NM_006268.3</a> | REQ;UBID4;MGC10180                     | DNA        | nucleus      | induction   |
| GI_21536318-S | 1017.9 | 1009.3 | 978.3  | RXRA    | <a href="#">NM_002957.3</a> | NR2B1                                  | retinoid-X | nucleus      | vitamin     |
| GI_21536323-A | 2313.9 | 2878.6 | 2998.2 | HNRPUL1 | <a href="#">NM_144734.1</a> | E1BAP5;E1B-AP5;FLJ12944                | heterogen  | nucleus      | response    |
| GI_21536328-I | 326.2  | 378.6  | 362.6  | DDX11   | <a href="#">NM_030655.2</a> | CHL1;KRG2;CHLR1;MGC9335                | helicase   | nucleolus    | mitotic     |
| GI_21536329-S | 106.8  | 106.3  | 108.4  | DDX6    | <a href="#">NM_004397.3</a> | P54;RCK;HLR2                           | helicase   | nucleus      | oncogene    |
| GI_21536330-I | 103.1  | 129.4  | 108.8  | DUSP10  | <a href="#">NM_144728.1</a> | MKP5;MKP-5                             | protein    | cytoplasm    | JNK         |
| GI_21536332-A | 758.3  | 727    | 697    | DUSP10  | <a href="#">NM_144729.1</a> | MKP5;MKP-5                             | protein    | cytoplasm    | JNK         |
| GI_21536334-I | 295.7  | 295.1  | 270.5  | DUSP10  | <a href="#">NM_007207.3</a> | MKP5;MKP-5                             | protein    | cytoplasm    | JNK         |
| GI_21536335-I | 138.7  | 159.9  | 139.8  | DUSP4   | <a href="#">NM_057158.2</a> | TYP;HVH2;MKP2;MKP-2                    | protein    | nucleus      | MAPKKK      |
| GI_21536336-A | 157.5  | 169.3  | 127    | EVA1    | <a href="#">NM_144765.1</a> | EVA;MPZL2                              | cell       | cytoskelet   | homophili   |
| GI_21536336-I | 143.7  | 132.3  | 104.5  | EVA1    | <a href="#">NM_144765.1</a> | EVA;MPZL2                              | cell       | cytoskelet   | homophili   |
| GI_21536343-I | 152    | 186.8  | 160.4  | TCL6    | <a href="#">NM_020553.2</a> | TNG1;TNG2;TCL6e1                       |            |              |             |
| GI_21536345-A | 89.3   | 91.5   | 83.4   | TCL6    | <a href="#">NM_020554.2</a> | TNG1;TNG2;TCL6e1                       |            |              |             |
| GI_21536348-A | 1896.1 | 2557.9 | 1325.2 | ACCN2   | <a href="#">NM_001095.2</a> | ASIC;BNAc2;ASIC1A                      | amiloride- | integral to  | response    |
| GI_21536350-I | 155    | 170.9  | 167.5  | ACCN2   | <a href="#">NM_020039.2</a> | ASIC;BNAc2;ASIC1A                      | amiloride- | integral to  | response    |
| GI_21536352-S | 808.8  | 853.7  | 709.2  | ACTL6   | <a href="#">NM_016188.3</a> | BAF53B                                 | structural | actin        | establish   |
| GI_21536354-A | 272.5  | 295.5  | 336.1  | TAF6    | <a href="#">NM_139122.1</a> | TAF2E;TAFII70;TAFII80;TAFII85;MGC:8964 | protein    | transcripti  | transcripti |
| GI_21536361-A | 323    | 198.9  | 173.1  | TAF1A   | <a href="#">NM_139352.1</a> | SL1;RAFI48;TAFI48;MGC:17061            | RNA        |              | transcripti |
| GI_21536363-I | 138.8  | 121.7  | 102.9  | TAF1A   | <a href="#">NM_005681.2</a> | SL1;RAFI48;TAFI48;MGC:17061            | RNA        |              | transcripti |
| GI_21536364-S | 519.5  | 364.7  | 363.9  | TAF1B   | <a href="#">NM_005680.1</a> | SL1;RAF1B;RAFI63;TAFI63;MGC:9349       | RNA        |              | transcripti |
| GI_21536366-A | 887.9  | 998.4  | 715.4  | TAF1C   | <a href="#">NM_139353.1</a> | SL1;TAFI95;TAFI110;MGC:39976           | RNA        |              | transcripti |
| GI_21536368-I | 294.4  | 359.7  | 328.8  | TAF1C   | <a href="#">NM_005679.2</a> | SL1;TAFI95;TAFI110;MGC:39976           | RNA        |              | transcripti |
| GI_21536370-S | 325.8  | 372.4  | 339.1  | TEP1    | <a href="#">NM_007110.3</a> | TP1;TLP1;p240;VAULT2                   | protein    | nucleus      | DNA         |
| GI_21536372-S | 2761.5 | 2402.3 | 1865.6 | TERF2   | <a href="#">NM_005652.2</a> | TRF2;TRBF2                             | DNA        | telomere     | telomere    |
| GI_21536373-S | 494    | 554.8  | 503.1  | ZNF498  | <a href="#">NM_145115.1</a> | FLJ32468                               |            |              |             |
| GI_21536375-S | 2175.7 | 4340.3 | 6331.2 | ABCA1   | <a href="#">NM_005502.2</a> | TGD;ABC1;CERP;HDLDT1                   | anion      | membran      | phagocyto   |
| GI_21536377-S | 113.3  | 103.9  | 110.7  | ABCB11  | <a href="#">NM_003742.2</a> | BSEP;PGY4;SPGP;ABC16;PFIC2;PFIC-2      | bile acid  | membran      | small       |
| GI_21536379-S | 84.7   | 89.9   | 91.2   | ABCD2   | <a href="#">NM_005164.2</a> | ALDR;ABC39;ALDL1;ALDRP                 | ATP        | peroxisom    | fatty acid  |
| GI_21536380-I | 109.9  | 107.6  | 114.6  | ABCD4   | <a href="#">NM_020326.2</a> | P70R;P79R;ABC41;PMP69;PXMP1L;EST352    | ATP        | peroxisom    | small       |
| GI_21536384-A | 168.8  | 180.8  | 171.2  | ADAM22  | <a href="#">NM_021721.2</a> | MDC2                                   | integrin   | integral to  | central     |
| GI_21536385-I | 79.2   | 85     | 84.7   | ADAM22  | <a href="#">NM_021722.2</a> | MDC2                                   | integrin   | integral to  | central     |
| GI_21536389-S | 107.2  | 119.9  | 99.6   | ADAMTS6 | <a href="#">NM_014273.2</a> | ADAM-TS6                               | metallope  | extracellul  | proteolysis |
| GI_21536391-S | 176.6  | 179.3  | 181.4  | ADAMTS8 | <a href="#">NM_007037.2</a> | METH2;ADAM-TS8                         | integrin   | extracellul  | negative    |
| GI_21536395-A | 103.8  | 105.3  | 94.2   | ANGPTL4 | <a href="#">NM_016109.2</a> | ARP4;FIAF;PGAR;HFARP;PPARG;pp1158;A    |            | kinesin      |             |
| GI_21536397-I | 108.3  | 105.6  | 105.5  | ANGPTL4 | <a href="#">NM_139314.1</a> | ARP4;FIAF;PGAR;HFARP;PPARG;pp1158;A    |            | kinesin      |             |
| GI_21536405-I | 83.5   | 95.1   | 90.9   | AMPH    | <a href="#">NM_001635.2</a> | AMPH1                                  |            | synaptic     | endocytosi  |
| GI_21536416-A | 1294.7 | 1244.4 | 1193.1 | BIN1    | <a href="#">NM_139351.1</a> | AMPH2;AMPHL;SH3P9;MGC10367;DKFZp5      | tumor      | actin        | nonselecti  |
| GI_21536418-S | 161.7  | 133.2  | 142.6  | BIK     | <a href="#">NM_001197.3</a> | BP4;NBK;BBC1;BIP1                      | apoptosis  | integral to  | apoptotic   |
| GI_21536419-A | 152.3  | 168.7  | 148.3  | BIRC7   | <a href="#">NM_022161.2</a> | KIAP;LIVIN;MLIAP;RNF50;ML-IAP          | apoptosis  | intracellula | activation  |

|               |         |        |        |           |                             |                                    |             |             |               |
|---------------|---------|--------|--------|-----------|-----------------------------|------------------------------------|-------------|-------------|---------------|
| GI_21536422-A | 94.9    | 85.3   | 125.6  | AMPH      | <a href="#">NM_139316.1</a> | AMPH1                              |             | synaptic    | endocytosi    |
| GI_21536424-S | 542.2   | 508.7  | 508.7  | WBP4      | <a href="#">NM_007187.3</a> | FBP21                              | RNA         | nucleus     |               |
| GI_21536425-A | 536     | 598.4  | 582.1  | WDR5      | <a href="#">NM_052821.2</a> | BIG-3                              | signal      | heterotrim  | G-protein     |
| GI_21536426-S | 132.3   | 168.1  | 182.3  | WNT3      | <a href="#">NM_030753.3</a> | INT4                               | extracellul | extracellul | morphoge      |
| GI_21536427-S | 573.4   | 749.2  | 733.9  | WRB       | <a href="#">NM_004627.2</a> | CHD5                               |             | nucleus     |               |
| GI_21536429-I | 89.8    | 94.6   | 95.2   | WVWX      | <a href="#">NM_018560.4</a> | FOR;FRA16D;HHCMA56;PRO0128;D16S43  | catalytic   |             | steroid       |
| GI_21536430-S | 78.8    | 106.9  | 94.7   | TF        | <a href="#">NM_001063.2</a> | PRO1557;PRO2086                    | iron ion    | extracellul | iron ion      |
| GI_21536431-S | 1454.8  | 7022   | 1085.1 | TIMP3     | <a href="#">NM_000362.3</a> | SFD;K222TA2;HSMRK222               | metalloen   |             | proteolysis   |
| GI_21536432-A | 136.8   | 149.2  | 135.4  | TNFSF11   | <a href="#">NM_033012.2</a> | ODF;OPGL;sOdf;RANKL;TRANCE;hRANKL2 | cytokine    | extracellul | positive      |
| GI_21536432-I | 119.8   | 138.5  | 118.4  | TNFSF11   | <a href="#">NM_033012.2</a> | ODF;OPGL;sOdf;RANKL;TRANCE;hRANKL2 | cytokine    | extracellul | positive      |
| GI_21536433-S | 231.1   | 236.7  | 214.8  | TRIAD3    | <a href="#">NM_019011.3</a> | ZIN;U7I1;UBCE7IP1                  |             | kinesin     | apoptosis     |
| GI_21536437-S | 329.8   | 333.9  | 348.6  | FBXL4     | <a href="#">NM_012160.3</a> | FBL4;FBL5                          |             | ubiquitin   | ubiquitin-    |
| GI_21536438-A | 1505.4  | 2187.4 | 1277.5 | FBXL5     | <a href="#">NM_012161.2</a> | FBL4;FBL5;FLR1                     | ubiquitin   |             | proteolysis   |
| GI_21536439-I | 71.5    | 79.1   | 68.2   | FBXL5     | <a href="#">NM_033535.2</a> | FBL4;FBL5;FLR1                     | ubiquitin   |             | proteolysis   |
| GI_21536440-S | 180.9   | 190.4  | 168.6  | BARX2     | <a href="#">NM_003658.3</a> |                                    | RNA         | nucleus     | transcripti   |
| GI_21536441-S | 182.3   | 285.1  | 229.7  | BCL7A     | <a href="#">NM_020993.2</a> | BCL7                               | actin       |             | oncogene      |
| GI_21536442-S | 209.8   | 253.5  | 244.3  | BFSP2     | <a href="#">NM_003571.2</a> | CP47;CP49;LIFL-L;PHAKININ          | structural  | intermedia  | vision        |
| GI_21536443-A | 12458.1 | 10935  | 7267.6 | BZRP      | <a href="#">NM_007311.2</a> | MBR;PBR                            | benzodiaz   | mitochond   | mitochond     |
| GI_21536444-I | 1454.6  | 1189.6 | 776    | BZRP      | <a href="#">NM_000714.3</a> | MBR;PBR                            | benzodiaz   | mitochond   | mitochond     |
| GI_21536446-S | 140.2   | 157.2  | 131.2  | PAK6      | <a href="#">NM_020168.3</a> | PAK5                               | protein-    |             | protein       |
| GI_21536448-S | 1191.6  | 1275.8 | 1278.2 | PFDN1     | <a href="#">NM_002622.3</a> | PDF;PFD1                           | transcripti |             | cell cycle    |
| GI_21536450-A | 556.2   | 556.6  | 581    | PHF1      | <a href="#">NM_002636.3</a> | PHF2                               | transcripti | nucleus     | regulation    |
| GI_21536451-S | 148.5   | 392.4  | 155.8  | PRSS3     | <a href="#">NM_002771.2</a> | MTG;TRY3;TRY4;PRSS4                | trypsin     | extracellul | proteolysis   |
| GI_21536453-S | 106.3   | 115.1  | 100.6  | PRSS8     | <a href="#">NM_002773.2</a> | PROSTASIN                          | serine-     | integral to | proteolysis   |
| GI_21536454-I | 145.3   | 166.5  | 138.6  | PSEN1     | <a href="#">NM_000021.2</a> | AD3;FAD;PS1;S182                   |             | integral to | chromoso      |
| GI_21536455-S | 122.5   | 150.9  | 136.2  | PTGIS     | <a href="#">NM_000961.2</a> | CYP8;PGIS;PTGI;CYP8A1              | prostaglan  | endoplas    | prostaglan    |
| GI_21536456-S | 910.5   | 823.5  | 760.6  | MOAP1     | <a href="#">NM_022151.3</a> | MAP-1;PNMA4                        |             |             | apoptosis     |
| GI_21536459-S | 239     | 198.8  | 230.2  | MAP3K5    | <a href="#">NM_005923.3</a> | ASK1;MEKK5;MAPKKK5                 | MAP         |             | activation    |
| GI_21536460-S | 158     | 204.7  | 188.1  | MFNG      | <a href="#">NM_002405.2</a> |                                    | transferas  | Golgi       | pattern       |
| GI_21536462-I | 269     | 147    | 114.7  | MMP25     | <a href="#">NM_022468.3</a> | MMP20;MT6-MMP;LEUKOLYSIN           | zinc ion    | membran     | proteolysis   |
| GI_21536463-S | 138.1   | 145.6  | 131.8  | MPP3      | <a href="#">NM_001932.2</a> | DLG3                               | guanylate   | integral to | oncogene      |
| GI_21536467-A | 10759.3 | 6615.1 | 5777.7 | AXL       | <a href="#">NM_001699.3</a> | UFO                                | transmem    | integral to | signal        |
| GI_21536469-S | 106.2   | 113.4  | 117    | DAO       | <a href="#">NM_001917.3</a> | DAAO;OXDA;DAMOX;MGC35381           | D-amino-    | peroxisom   | electron      |
| GI_21536471-S | 86.8    | 86.2   | 78.9   | DAZ       | <a href="#">NM_004081.3</a> | DAZ1;SPGY                          | RNA         |             | fertilization |
| GI_21536472-I | 106.1   | 107.5  | 107.6  | DLEC1     | <a href="#">NM_007338.2</a> | F56;DLC1                           | tumor       |             | negative      |
| GI_21536473-S | 96.5    | 102.9  | 93.2   | DMXL1     | <a href="#">NM_005509.3</a> |                                    | protein     |             | proteolysis   |
| GI_21536478-I | 94.7    | 97.1   | 90.8   | L3MBTL    | <a href="#">NM_015478.4</a> | L3MBTL1;KIAA0681;H-                | transcripti | nucleus     | regulation    |
| GI_21536480-A | 114.5   | 113.5  | 101.9  | L3MBTL    | <a href="#">NM_032107.2</a> | L3MBTL1;KIAA0681;H-                | transcripti | nucleus     | regulation    |
| GI_21536480-I | 187.1   | 221.5  | 188.8  | L3MBTL    | <a href="#">NM_032107.2</a> | L3MBTL1;KIAA0681;H-                | transcripti | nucleus     | regulation    |
| GI_21536482-S | 159.2   | 189.9  | 166.3  | HIST1H2BG | <a href="#">NM_003518.3</a> | H2B/a;H2BFA;H2B.1A                 | DNA         | chromoso    | nucleoso      |
| GI_21536483-S | 770.9   | 903.5  | 674.7  | HIP2      | <a href="#">NM_005339.3</a> | LIG;HYPG                           | ubiquitin   |             | small         |
| GI_21536484-S | 231.4   | 205.4  | 198    | HIRA      | <a href="#">NM_003325.3</a> | TUP1;DGCR1;TUPLE1                  | transcripti | nucleus     | embryoge      |
| GI_21539662-A | 326.2   | 336.8  | 327.3  | PJA1      | <a href="#">NM_022368.2</a> | RNF70;FLJ11830                     | ligase      |             |               |
| GI_21553310-S | 183     | 208.3  | 181.8  | HSPC105   | <a href="#">NM_145168.1</a> |                                    | 3-beta-     |             | steroid       |

|               |         |        |                  |                             |                                      |  |            |                          |
|---------------|---------|--------|------------------|-----------------------------|--------------------------------------|--|------------|--------------------------|
| GI_21553312-S | 298.9   | 347.3  | 355 C14orf52     | <a href="#">NM_145165.1</a> | My015;FLJ33064                       |  |            | developm                 |
| GI_21553314-S | 619.6   | 825.4  | 922.2 PIGM       | <a href="#">NM_145167.1</a> | MGC29896                             |  | transferas |                          |
| GI_21553316-S | 2804.1  | 2967.5 | 3334.7 C6orf83   | <a href="#">NM_145169.1</a> | pRGR1;MGC19825                       |  |            |                          |
| GI_21553320-S | 95.3    | 106.4  | 97.8 NYD-SP29    | <a href="#">NM_145172.1</a> | FLJ30067                             |  |            |                          |
| GI_21553322-S | 91.5    | 117.6  | 105.3 DIRAS1     | <a href="#">NM_145173.1</a> | RIG;GBTS1;Di-Ras1                    |  | small      | small                    |
| GI_21553324-S | 194.8   | 220.7  | 223.3 DHRSX      | <a href="#">NM_145177.1</a> | DHRS5X;DHRSXY;CXorf11                |  | oxidoredu  | metabolis                |
| GI_21553330-S | 214.2   | 367.8  | 301.3 SLC2A12    | <a href="#">NM_145176.1</a> | GLUT8;GLUT12                         |  | transporte | integral to carbohydr    |
| GI_21553334-S | 98.3    | 101    | 101 DNAJB7       | <a href="#">NM_145174.1</a> | HSC3                                 |  |            |                          |
| GI_21553338-S | 156.4   | 173.9  | 168.2 C21orf93   | <a href="#">NM_145179.1</a> |                                      |  |            |                          |
| GI_21614495-S | 261     | 176    | 159.9 VAV3       | <a href="#">NM_006113.3</a> |                                      |  | SH3/SH2    | small                    |
| GI_21614497-S | 1474.7  | 1660.6 | 1549.6 VBP1      | <a href="#">NM_003372.3</a> | PFD3;PFDN3;VBP-1                     |  | protein    | prefoldin protein        |
| GI_21614498-S | 3936.7  | 3945   | 4198.8 VIL2      | <a href="#">NM_003379.3</a> | CVL;CVIL;MGC1584;DKFZp762H157        |  |            | microvillus cytoskelet   |
| GI_21614500-A | 3751.6  | 3894.8 | 4227.5 DEGS      | <a href="#">NM_144780.1</a> | MLD;DES1;Des-1;MGC5079               |  | electron   | membran fatty acid       |
| GI_21614503-I | 1064.3  | 1339.8 | 1517.8 DEGS      | <a href="#">NM_003676.2</a> | MLD;DES1;Des-1;MGC5079               |  | electron   | membran fatty acid       |
| GI_21614504-I | 113.1   | 132.5  | 123.6 CISH       | <a href="#">NM_013324.4</a> | CIS;G18;SOCS;CIS-1                   |  | molecular  | cellular_co intracellula |
| GI_21614506-A | 859.8   | 958.3  | 870.6 CISH       | <a href="#">NM_145071.1</a> | CIS;G18;SOCS;CIS-1                   |  | molecular  | cellular_co intracellula |
| GI_21614508-I | 782.8   | 545.3  | 561 DIAPH2       | <a href="#">NM_006729.2</a> | DIA;POF;DIA2;POF2                    |  | receptor   | kinesin cytokinesi       |
| GI_21614509-A | 191.8   | 190.7  | 178.7 FGF12      | <a href="#">NM_021032.2</a> | FHF1;FGF12B                          |  | growth     | extracellul heart        |
| GI_21614509-I | 122.4   | 121.5  | 115.6 FGF12      | <a href="#">NM_021032.2</a> | FHF1;FGF12B                          |  | growth     | extracellul heart        |
| GI_21614510-I | 132.4   | 152.3  | 125.1 FGF12      | <a href="#">NM_004113.3</a> | FHF1;FGF12B                          |  | growth     | extracellul heart        |
| GI_21614512-I | 453     | 704.8  | 398 FTHFD        | <a href="#">NM_012190.2</a> |                                      |  | catalytic  | 10-                      |
| GI_21614514-A | 460.8   | 684.6  | 287.1 FTHFD      | <a href="#">NM_144776.1</a> |                                      |  | catalytic  | 10-                      |
| GI_21614516-A | 109.3   | 104.5  | 101.6 GYPC       | <a href="#">NM_016815.2</a> | GE;GPC                               |  | blood      | integral to N-linked     |
| GI_21614517-S | 265.2   | 311.7  | 281 GABRR1       | <a href="#">NM_002042.2</a> |                                      |  | GABA-A     | integral to gamma-       |
| GI_21614518-S | 100.5   | 95     | 86.9 GAN         | <a href="#">NM_022041.2</a> | GAN1                                 |  | protein    | neurofilam biological_   |
| GI_21614519-S | 408.9   | 719.5  | 667.7 G6PD       | <a href="#">NM_000402.2</a> | G6PD1                                |  | glucose-6- | cellular_co glucose 6-   |
| GI_21614521-S | 290.4   | 207.1  | 155.1 GCA        | <a href="#">NM_012198.2</a> | GCL                                  |  | calcium    | cytoplasm membran        |
| GI_21614524-S | 139.6   | 154    | 122.4 GPC4       | <a href="#">NM_001448.2</a> |                                      |  | glypican   | proteoglyc embryoge      |
| GI_21614526-S | 1397    | 1638.9 | 1119.1 MAP2K1IP1 | <a href="#">NM_021970.2</a> | MP1                                  |  | enzyme     | activation               |
| GI_21614527-S | 11048.2 | 10348  | 9491.4 MAP2K2    | <a href="#">NM_030662.2</a> | MEK2;MKK2;MAPKK2;PRKMK2              |  | protein-   | extracellul protein      |
| GI_21614528-S | 133.6   | 142.1  | 124.2 NAP1L2     | <a href="#">NM_021963.2</a> | BPX;MGC26243                         |  | DNA        | chromatin nucleoso       |
| GI_21614529-I | 311.8   | 396.5  | 338.1 NOX1       | <a href="#">NM_007052.3</a> | MOX1;NOH1;NOH-1;GP91-2               |  | superoxid  | integral to proton       |
| GI_21614532-A | 417.4   | 523.9  | 468.8 PRSS21     | <a href="#">NM_144957.1</a> | ESP-1;TEST1                          |  | serine-    | cytoplasm proteolysis    |
| GI_21614535-S | 116.2   | 126.1  | 110.7 PRSS22     | <a href="#">NM_022119.2</a> | BSSP-4;MGC9599;SP001LA;hBSSP-4       |  | trypsin    | proteolysis              |
| GI_21614536-I | 602     | 610.1  | 530.8 PRSS25     | <a href="#">NM_013247.3</a> | OMI;HtrA2                            |  | serine-    | endoplas response        |
| GI_21614537-A | 611.9   | 671.2  | 599.4 PRSS25     | <a href="#">NM_145074.1</a> | OMI;HtrA2                            |  | serine-    | endoplas response        |
| GI_21614540-S | 155.1   | 176.3  | 167.1 SAC        | <a href="#">NM_018417.2</a> | HCA2                                 |  | adenylate  | soluble intracellula     |
| GI_21614541-S | 145.6   | 152.8  | 132.9 SIM1       | <a href="#">NM_005068.2</a> |                                      |  | DNA        | nucleus embryoge         |
| GI_21614543-S | 87.6    | 98.7   | 81.3 S100A8      | <a href="#">NM_002964.3</a> | P8;MIF;NIF;CAGA;CFAG;CGLA;L1Ag;MRP8; |  | calcium    | extracellul inflammat    |
| GI_21614545-S | 462.7   | 388.7  | 279.7 PSPH       | <a href="#">NM_004577.2</a> | PSP                                  |  | phosphos   | L-serine                 |
| GI_21614546-S | 150.9   | 172.8  | 153.1 PSPN       | <a href="#">NM_004158.2</a> | PSP                                  |  | receptor   | central                  |
| GI_21614547-S | 180.8   | 193.4  | 191.2 IRAK2      | <a href="#">NM_001570.2</a> | IRAK-2                               |  | NF-        | NIK-I-                   |
| GI_21614549-S | 172.9   | 192.7  | 187.6 ITK        | <a href="#">NM_005546.3</a> | EMT;LYK;PSCTK2                       |  | non-       | cellular                 |
| GI_21614550-S | 152.7   | 171.4  | 152.9 UCP1       | <a href="#">NM_021833.3</a> | UCP;SLC25A7                          |  | uncouplin  | mitochond proton         |

|               |        |        |        |           |                             |                                   |             |              |              |
|---------------|--------|--------|--------|-----------|-----------------------------|-----------------------------------|-------------|--------------|--------------|
| GI_21614551-S | 127.8  | 144.8  | 133.3  | SPRL1B    | <a href="#">NM_014357.2</a> | XP5;LEP10                         | molecular   | cellular_co  | epidermal    |
| GI_21618324-S | 428.7  | 537.8  | 485.5  | FOXE1     | <a href="#">NM_004473.3</a> | TTF2;TITF2;TTF-2;FKHL15           | RNA         | nucleus      | ectoderm     |
| GI_21618326-I | 130.1  | 159.2  | 136.3  | FOXI1     | <a href="#">NM_012188.3</a> | HFH3;FKHL10;FREAC6                | DNA         | nucleus      | regulation   |
| GI_21618328-A | 98.7   | 108.8  | 92.7   | FOXI1     | <a href="#">NM_144769.1</a> | HFH3;FKHL10;FREAC6                | DNA         | nucleus      | regulation   |
| GI_21618332-S | 238.5  | 242.5  | 222.2  | STAT4     | <a href="#">NM_003151.2</a> |                                   | transcripti | nucleus      | JAK-STAT     |
| GI_21618333-I | 351.7  | 400.3  | 361.2  | CRAT      | <a href="#">NM_004003.2</a> | CAT1                              |             | peroxisom    | energy       |
| GI_21618335-A | 727.7  | 884.8  | 899.3  | CRAT      | <a href="#">NM_144782.1</a> | CAT1                              |             | peroxisom    | energy       |
| GI_21618337-A | 528.5  | 893.4  | 938.8  | STAT3     | <a href="#">NM_003150.2</a> | APRF                              | hematopoi   | cytoplasm    | JAK-STAT     |
| GI_21618341-S | 146.9  | 129.4  | 109.7  | STAT5A    | <a href="#">NM_003152.2</a> | MGF;STAT5                         | transcripti | nucleus      | JAK-STAT     |
| GI_21618345-S | 113.1  | 119.3  | 108.7  | OTOR      | <a href="#">NM_020157.2</a> | FDP;MIAL                          |             |              | hearing      |
| GI_21618346-I | 99.8   | 109.3  | 97.1   | MAP2K3    | <a href="#">NM_002756.2</a> | MEK3;MKK3;MAPKK3;PRKMK3           | MAP         |              | signal       |
| GI_21618348-A | 178.7  | 163.5  | 157.4  | MAP2K3    | <a href="#">NM_145109.1</a> | MEK3;MKK3;MAPKK3;PRKMK3           | MAP         |              | signal       |
| GI_21618348-I | 161.2  | 163.7  | 158.8  | MAP2K3    | <a href="#">NM_145109.1</a> | MEK3;MKK3;MAPKK3;PRKMK3           | MAP         |              | signal       |
| GI_21618350-I | 109.6  | 125.9  | 98     | MAP2K3    | <a href="#">NM_145110.1</a> | MEK3;MKK3;MAPKK3;PRKMK3           | MAP         |              | signal       |
| GI_21618355-A | 253.2  | 287.7  | 268.6  | KLK11     | <a href="#">NM_006853.2</a> | TLSP;PRSS20;MGC33060              | serine-     |              | proteolysis  |
| GI_21618355-I | 166.5  | 183.7  | 175.3  | KLK11     | <a href="#">NM_006853.2</a> | TLSP;PRSS20;MGC33060              | serine-     |              | proteolysis  |
| GI_21618356-I | 81.9   | 80.4   | 92.7   | KLK11     | <a href="#">NM_144947.1</a> | TLSP;PRSS20;MGC33060              | serine-     |              | proteolysis  |
| GI_21618360-S | 4210.3 | 2581   | 3071.1 | FXYD5     | <a href="#">NM_014164.3</a> | RIC;IWU1;KCT1;IWU-1;dysad;HSPC113 | ion         | integral to  | ion          |
| GI_21624640-S | 349.5  | 427.4  | 372.5  | CABP4     | <a href="#">NM_145200.1</a> |                                   | calcium     | cellular_co  | signal       |
| GI_21624647-S | 142.7  | 149.9  | 147.5  | VTI1A     | <a href="#">NM_145206.1</a> | MVti1;Vti1-rp2                    | protein     | kinesin      | intracellula |
| GI_21624653-S | 99     | 112.4  | 101.3  | SPATA5    | <a href="#">NM_145207.1</a> | SPAF                              | nucleotide  |              |              |
| GI_21624655-S | 107.7  | 124.5  | 110.6  | MBD3L1    | <a href="#">NM_145208.1</a> | MBD3L                             |             |              |              |
| GI_21626459-S | 656.4  | 3594.5 | 1626.3 | AF1Q      | <a href="#">NM_006818.2</a> |                                   | molecular   | cellular_co  | cell growth  |
| GI_21626460-S | 188.4  | 227.4  | 191.8  | AIPL1     | <a href="#">NM_014336.2</a> | LCA4;AIPL2                        | chaperone   | nucleus      | vision       |
| GI_21626462-S | 129    | 134.9  | 119.3  | APC       | <a href="#">NM_000038.2</a> | GS;DP2;DP3;FAP;FPC;DP2.5          | beta-       | kinesin      | cell         |
| GI_21626463-S | 2217.2 | 3409.8 | 2904.3 | ARCN1     | <a href="#">NM_001655.3</a> | COPD                              | protein     | membran      | intracellula |
| GI_21626467-S | 936.3  | 898.4  | 750.4  | NP220     | <a href="#">NM_014497.2</a> | MGC26130                          | double-     | nucleoplas   | mRNA         |
| GI_21630256-S | 135.4  | 121.4  | 122.9  | MTBP      | <a href="#">NM_022045.2</a> | MDM2BP                            |             |              |              |
| GI_21630284-S | 130.8  | 164.5  | 142.7  | PDZK2     | <a href="#">NM_024791.2</a> | IKEPP;PDZD3;FLJ22756              |             |              |              |
| GI_21686972-S | 97.6   | 98.2   | 94.7   | LOC196549 | <a href="#">NM_145293.1</a> |                                   |             |              |              |
| GI_21686976-S | 129    | 153    | 129.8  | IGSF4C    | <a href="#">NM_145296.1</a> | TSLL2                             |             |              |              |
| GI_21686978-S | 128.7  | 132.2  | 162.4  | LOC200383 | <a href="#">NM_145299.1</a> |                                   | nucleotide  |              |              |
| GI_21686980-S | 107    | 105.9  | 108.7  | LOC200420 | <a href="#">NM_145300.1</a> |                                   |             |              |              |
| GI_21686994-S | 128.4  | 148.1  | 139.7  | STOML3    | <a href="#">NM_145286.1</a> | SRO;Epb7.2l                       |             | membran      |              |
| GI_21686996-S | 169.8  | 180.4  | 148.7  | ZNF519    | <a href="#">NM_145287.1</a> | HsT2362                           | nucleic     | intracellula | regulation   |
| GI_21687002-S | 106.4  | 104.2  | 103.5  | DUX2      | <a href="#">NM_012147.2</a> |                                   | transcripti | nucleus      | regulation   |
| GI_21687023-S | 113.7  | 125.9  | 118.6  | NPCR      | <a href="#">NM_145318.1</a> |                                   |             |              |              |
| GI_21687040-S | 112.8  | 93.6   | 115.2  | C14orf6   | <a href="#">NM_145250.1</a> |                                   |             | pancreatic   |              |
| GI_21687046-S | 106.7  | 115.6  | 108.9  | X102      | <a href="#">NM_030879.2</a> |                                   |             |              |              |
| GI_21687047-S | 123    | 135.6  | 129.6  | WDR31     | <a href="#">NM_145241.1</a> |                                   | transporte  | membran      | transport    |
| GI_21687049-S | 96.5   | 95.2   | 84.9   | LOC115131 | <a href="#">NM_145242.1</a> |                                   | olfactory   | integral to  | G-protein    |
| GI_21687059-S | 302.6  | 611.6  | 238.4  | LOC124220 | <a href="#">NM_145252.1</a> |                                   |             |              |              |
| GI_21687061-S | 224.4  | 265    | 227.7  | LOC124402 | <a href="#">NM_145253.1</a> |                                   |             |              |              |
| GI_21687067-S | 115.2  | 122.8  | 91.8   | LOC202459 | <a href="#">NM_145303.1</a> |                                   |             |              |              |

|               |        |        |        |           |                             |                                   |             |                         |
|---------------|--------|--------|--------|-----------|-----------------------------|-----------------------------------|-------------|-------------------------|
| GI_21687071-S | 109.3  | 94.6   | 101.1  | LOC124491 | <a href="#">NM_145254.1</a> |                                   |             |                         |
| GI_21687081-S | 105.2  | 110.3  | 119    | LOC126731 | <a href="#">NM_145257.1</a> |                                   |             |                         |
| GI_21687083-S | 97.9   | 91     | 86.9   | MGC22773  | <a href="#">NM_145258.1</a> |                                   |             |                         |
| GI_21687097-S | 99.6   | 110    | 104.9  | ACVR1C    | <a href="#">NM_145259.1</a> | ALK7;ACVRLK7                      | protein-    | membran protein         |
| GI_21687111-S | 274.6  | 287    | 264.5  | LOC112476 | <a href="#">NM_145239.1</a> |                                   |             |                         |
| GI_21687118-S | 111.1  | 328.9  | 135.3  | LOC132671 | <a href="#">NM_145263.1</a> |                                   |             |                         |
| GI_21687122-S | 220.9  | 267    | 240.4  | LOC221044 | <a href="#">NM_145314.1</a> |                                   |             |                         |
| GI_21687134-S | 134.2  | 148.7  | 137.7  | C6orf57   | <a href="#">NM_145267.1</a> |                                   |             |                         |
| GI_21687138-S | 112.3  | 94.5   | 102.8  | B3GNT7    | <a href="#">NM_145236.1</a> |                                   | galactosylt | membran protein         |
| GI_21687142-S | 113.6  | 122.4  | 102.8  | RNASE8    | <a href="#">NM_138331.1</a> |                                   | pancreatic  |                         |
| GI_21687148-S | 130.5  | 122.2  | 132.6  | LOC148823 | <a href="#">NM_145278.1</a> |                                   |             |                         |
| GI_21687150-S | 1120   | 854.7  | 770    | LOC203427 | <a href="#">NM_145305.1</a> |                                   | structural  | ribosome transport      |
| GI_21687152-S | 627.9  | 364.5  | 284.7  | C10orf35  | <a href="#">NM_145306.1</a> |                                   |             |                         |
| GI_21687174-S | 181.9  | 199.3  | 233.9  | LOC220074 | <a href="#">NM_145309.1</a> |                                   |             |                         |
| GI_21687176-S | 172.8  | 205.3  | 186.2  | RASGEF1A  | <a href="#">NM_145313.1</a> | CG4853                            | guanyl-     | small                   |
| GI_21687187-S | 160    | 194.5  | 160.4  | LOC146325 | <a href="#">NM_145270.1</a> |                                   |             |                         |
| GI_21687211-S | 341.7  | 337.9  | 307.3  | UVRAG     | <a href="#">NM_003369.2</a> |                                   |             | kinesin DNA             |
| GI_21687219-S | 1577.5 | 1228   | 808.1  | MGC21518  | <a href="#">NM_145274.1</a> |                                   |             |                         |
| GI_21687223-S | 140.2  | 132.6  | 136.7  | SLC30A6   | <a href="#">NM_017964.2</a> | ZNT6;FLJ31101;MGC45055            |             |                         |
| GI_21687227-S | 245    | 262    | 267.4  | C14orf143 | <a href="#">NM_145231.1</a> |                                   | calcium     |                         |
| GI_21687234-A | 108.3  | 107.4  | 116.5  | KLC2L     | <a href="#">NM_145275.1</a> | KLC2;KLCt;KNS2B                   |             |                         |
| GI_21687234-I | 164.8  | 174.8  | 160    | KLC2L     | <a href="#">NM_145275.1</a> | KLC2;KLCt;KNS2B                   |             |                         |
| GI_21687236-S | 110.2  | 109.7  | 109.6  | ZNF563    | <a href="#">NM_145276.1</a> |                                   | nucleic     | intracellula regulation |
| GI_21687251-S | 202.4  | 231.1  | 208.7  | ZNF342    | <a href="#">NM_145288.1</a> |                                   | DNA         | nucleus regulation      |
| GI_21687261-S | 86.3   | 102.9  | 96.6   | LOC91661  | <a href="#">NM_138372.1</a> |                                   | nucleic     | intracellula regulation |
| GI_21687263-S | 147.5  | 343.2  | 522.3  | ZNF558    | <a href="#">NM_144693.1</a> | FLJ30932                          | nucleic     | nucleus regulation      |
| GI_21687265-S | 133.8  | 166.2  | 136.3  | LOC115648 | <a href="#">NM_145326.1</a> |                                   | nucleic     | intracellula regulation |
| GI_21687267-S | 91.9   | 86.5   | 83     | CNOT6L    | <a href="#">NM_144571.1</a> | FLJ23561;FLJ25459;DKFZp434K098    |             |                         |
| GI_21687269-S | 100.8  | 114.8  | 111.4  | MRVLDC2   | <a href="#">NM_144724.1</a> | MARVD2;FLJ30532                   | transporte  | synaptic transport      |
| GI_21699053-S | 93.1   | 95.8   | 92     | FLJ31846  | <a href="#">NM_144974.1</a> |                                   |             |                         |
| GI_21699059-S | 86.2   | 89.1   | 104.2  | ZNF564    | <a href="#">NM_144976.1</a> | MGC26914                          | nucleic     | intracellula regulation |
| GI_21699063-S | 127    | 115.3  | 116.6  | ZNF501    | <a href="#">NM_145044.1</a> | MGC21738                          |             | nucleus                 |
| GI_21699069-S | 964.4  | 1052.9 | 1353.1 | FAM14B    | <a href="#">NM_145249.1</a> |                                   |             | integral to             |
| GI_21699077-S | 135.1  | 147.5  | 129.1  | NKX2-3    | <a href="#">NM_145285.1</a> | NKX2C;NKX2.3                      | transcripti | nucleus regulation      |
| GI_21699081-S | 157.6  | 107.7  | 180.6  | LOC199777 | <a href="#">NM_145297.1</a> |                                   | DNA         | intracellula regulation |
| GI_21699083-S | 87     | 72.6   | 68.3   | LOC158046 | <a href="#">NM_145283.1</a> |                                   |             |                         |
| GI_21700762-S | 1335.9 | 1847.5 | 2119.7 | C16orf34  | <a href="#">NM_144570.1</a> | HN1L;FLJ13092                     |             |                         |
| GI_21702732-A | 166.5  | 181.8  | 163.3  | TNRC6     | <a href="#">NM_020847.1</a> | CAGH26;KIAA1460                   |             |                         |
| GI_21702732-I | 134.1  | 144.7  | 131.6  | TNRC6     | <a href="#">NM_020847.1</a> | CAGH26;KIAA1460                   |             |                         |
| GI_21702741-I | 858.6  | 887.2  | 678    | TNRC6     | <a href="#">NM_014494.1</a> | CAGH26;KIAA1460                   |             |                         |
| GI_21703361-A | 200.1  | 271    | 243.7  | SOC       | <a href="#">NM_145345.1</a> |                                   |             |                         |
| GI_21703366-S | 289.6  | 395.1  | 364.3  | DIRAS2    | <a href="#">NM_017594.2</a> | Di-Ras2;DKFZp761C07121            |             |                         |
| GI_21703709-S | 2533.6 | 2785.5 | 3080.4 | SCOTIN    | <a href="#">NM_016479.3</a> |                                   |             |                         |
| GI_21704266-I | 233.8  | 259.5  | 246    | MAX       | <a href="#">NM_145114.1</a> | MGC10775;MGC11225;MGC18164;MGC346 | transcripti | oncogene                |

|               |        |        |        |           |                             |                                    |                     |                          |
|---------------|--------|--------|--------|-----------|-----------------------------|------------------------------------|---------------------|--------------------------|
| GI_21704268-I | 104.1  | 115.5  | 101.7  | MAX       | <a href="#">NM_145116.1</a> | MGC10775;MGC11225;MGC18164;MGC346  | transcripti         | oncogene                 |
| GI_21704270-A | 2107.4 | 2390.6 | 2102.6 | POLR2J2   | <a href="#">NM_032958.2</a> | HRPB11B                            | DNA-                | transcripti              |
| GI_21704273-I | 104.3  | 120    | 104.1  | POLR2J2   | <a href="#">NM_145325.1</a> | HRPB11B                            | DNA-                | transcripti              |
| GI_21704275-S | 2614.8 | 2729.2 | 2503.1 | POLR2J    | <a href="#">NM_006234.3</a> | RPB11;RPB11A;RPB11m;hRPB14;POLR2J1 | DNA- DNA-           | transcripti              |
| GI_21704276-I | 114.3  | 102.4  | 98.6   | JAG2      | <a href="#">NM_002226.3</a> | HJ2                                | Notch               | integral to mystery      |
| GI_21704278-A | 234.6  | 226.1  | 155.9  | JAG2      | <a href="#">NM_145159.1</a> | HJ2                                | Notch               | integral to mystery      |
| GI_21704282-S | 195.8  | 226.2  | 206.3  | JPH3      | <a href="#">NM_020655.2</a> | JP3;HDL2;JP-3;TNRC22;CAGL237       |                     |                          |
| GI_21704284-S | 115.2  | 121.9  | 97.9   | JAM2      | <a href="#">NM_021219.2</a> | VEJAM;VE-JAM;C21orf43              |                     | integral to cell-cell    |
| GI_21704285-S | 2075.6 | 1897.4 | 1063.7 | JAM3      | <a href="#">NM_032801.3</a> | FLJ14529                           |                     |                          |
| GI_21704286-S | 143    | 150.1  | 129.5  | NEU3      | <a href="#">NM_006656.4</a> | SIAL3                              | catalytic           | membran gangliosid       |
| GI_21717802-S | 1444.9 | 1348   | 1529.9 | WBSCR20B  | <a href="#">NM_145645.1</a> |                                    |                     |                          |
| GI_21717806-S | 446.9  | 396.7  | 415.2  | MGC21654  | <a href="#">NM_145647.1</a> |                                    |                     |                          |
| GI_21717813-S | 102.9  | 117.1  | 109.6  | RYD5      | <a href="#">NM_145651.1</a> |                                    |                     |                          |
| GI_21717815-S | 1250.2 | 2096.9 | 1160   | SLC15A4   | <a href="#">NM_145648.1</a> | PHT1;PTR4                          | copper ion          | membran oligopepti       |
| GI_21717823-S | 121.5  | 109.4  | 103    | TCEB3C    | <a href="#">NM_145653.1</a> | HsT829;TCEB3L2                     | translation nucleus | transcripti              |
| GI_21717829-S | 107.9  | 122.7  | 115    | C8orf6    | <a href="#">NM_145656.1</a> |                                    |                     |                          |
| GI_21717831-S | 93     | 97.9   | 88.7   | SPESP1    | <a href="#">NM_145658.1</a> | MGC24663                           |                     |                          |
| GI_21729875-A | 99.7   | 119.4  | 98.5   | ABCC11    | <a href="#">NM_145186.1</a> | MRP8                               |                     |                          |
| GI_21729877-I | 140.3  | 129.4  | 125.3  | LIPT1     | <a href="#">NM_145196.1</a> | MGC12290;MGC13378                  | ligase              | mitochond lipid          |
| GI_21729879-I | 107.8  | 87.9   | 94     | LIPT1     | <a href="#">NM_145197.1</a> | MGC12290;MGC13378                  | ligase              | mitochond lipid          |
| GI_21729881-I | 140.7  | 176.4  | 138.4  | LIPT1     | <a href="#">NM_145198.1</a> | MGC12290;MGC13378                  | ligase              | mitochond lipid          |
| GI_21729883-A | 391.7  | 259.6  | 242.7  | LIPT1     | <a href="#">NM_145199.1</a> | MGC12290;MGC13378                  | ligase              | mitochond lipid          |
| GI_21729887-A | 128.5  | 137.2  | 122.3  | ABCC12    | <a href="#">NM_145188.1</a> | MRP9                               |                     |                          |
| GI_21729898-A | 724.5  | 612.9  | 512.8  | MAP2K5    | <a href="#">NM_145162.1</a> | MEK5;MAPKK5;PRKMK5;HsT17454        | protein             | signal                   |
| GI_21729898-I | 89.8   | 92.7   | 82.2   | MAP2K5    | <a href="#">NM_145162.1</a> | MEK5;MAPKK5;PRKMK5;HsT17454        | protein             | signal                   |
| GI_21735416-S | 98.6   | 118    | 101.4  | BICD2     | <a href="#">NM_015250.1</a> | KIAA0699                           |                     |                          |
| GI_21735418-S | 986.5  | 790.6  | 942.3  | BDG29     | <a href="#">NM_015144.1</a> | BDG-29;MGC14139                    |                     |                          |
| GI_21735486-S | 145.3  | 183    | 154.3  | ACBD5     | <a href="#">NM_145698.1</a> | KIAA1996;DKFZp434A2417             | acyl-CoA            |                          |
| GI_21735491-I | 146.3  | 172.7  | 154.6  | PPP1R1B   | <a href="#">NM_032192.2</a> | DARPP32;DARPP-32;FLJ20940          | protein             | cytoplasm signal         |
| GI_21735547-S | 215.5  | 248.7  | 327.7  | CEP2      | <a href="#">NM_007186.2</a> | C-NAP1;CEP250                      | DNA                 | cytoskelet DNA           |
| GI_21735549-S | 119.1  | 133    | 110.1  | MAP3K10   | <a href="#">NM_002446.2</a> | MST;MLK2                           | protein             | JNK                      |
| GI_21735551-S | 215.2  | 279.2  | 285.6  | MAP3K12   | <a href="#">NM_006301.2</a> | DLK;MUK;ZPK                        | protein             | cytoplasm JNK            |
| GI_21735553-S | 287.4  | 342.1  | 323.9  | MAP3K11   | <a href="#">NM_002419.2</a> | MLK3;PTK1;SPRK;MLK-3;MGC17114      | protein             | JNK                      |
| GI_21735555-S | 190.1  | 198.7  | 177.7  | MAP3K2    | <a href="#">NM_006609.2</a> | MEKK2;MEKK2B                       | protein             | activation               |
| GI_21735557-A | 210.6  | 211.6  | 185.3  | MAP3K7IP2 | <a href="#">NM_015093.2</a> | TAB2;FLJ21885;KIAA0733             |                     |                          |
| GI_21735558-I | 93.6   | 95.1   | 94     | MAP3K7IP2 | <a href="#">NM_145342.1</a> | TAB2;FLJ21885;KIAA0733             |                     |                          |
| GI_21735565-A | 1311.8 | 1490.9 | 1227.8 | MAP3K7    | <a href="#">NM_145333.1</a> | TAK1;TGF1a                         | MAP                 | TGFbeta                  |
| GI_21735567-S | 1255.5 | 1154.7 | 1079.4 | CEPT1     | <a href="#">NM_006090.2</a> | MGC45223                           | ethanolam           | integral to lipid        |
| GI_21735568-S | 119.4  | 116    | 114    | CLSPN     | <a href="#">NM_022111.2</a> | CLASPIN                            | protein             | cellular_co biological_  |
| GI_21735570-S | 227.4  | 268.8  | 256.8  | CMA1      | <a href="#">NM_001836.2</a> | CYH;MCT1                           | serine-             | proteolysis              |
| GI_21735571-S | 1323.8 | 1006.1 | 1260.2 | ECT2      | <a href="#">NM_018098.4</a> | FLJ10461                           | guanyl-             | intracellula cell growth |
| GI_21735574-S | 176    | 198.9  | 189    | JPH1      | <a href="#">NM_020647.1</a> | JP1;JP-1                           | molecular           | integral to biological_  |
| GI_21735576-S | 135.3  | 165.9  | 123.4  | SDK2      | <a href="#">NM_019064.2</a> | FLJ10832;KIAA1514                  |                     |                          |
| GI_21735583-A | 882.2  | 720.8  | 672.2  | OSBPL3    | <a href="#">NM_145322.1</a> | ORP3;ORP-3;OSBP3;KIAA0704;MGC21526 |                     | lipid                    |

|               |         |        |        |           |                             |                                 |             |              |              |
|---------------|---------|--------|--------|-----------|-----------------------------|---------------------------------|-------------|--------------|--------------|
| GI_21735591-A | 728.2   | 664.7  | 678.8  | PDCD2     | <a href="#">NM_002598.2</a> | RP8;ZMYND7;MGC12347             | DNA         | cytoplasm    | apoptosis    |
| GI_21735591-I | 1700.8  | 1428.4 | 975.3  | PDCD2     | <a href="#">NM_002598.2</a> | RP8;ZMYND7;MGC12347             | DNA         | cytoplasm    | apoptosis    |
| GI_21735593-I | 1510.3  | 1408.5 | 1868   | PDCD2     | <a href="#">NM_144781.1</a> | RP8;ZMYND7;MGC12347             | DNA         | cytoplasm    | apoptosis    |
| GI_21735599-S | 1215.8  | 947.9  | 1033.8 | PDCD5     | <a href="#">NM_004708.2</a> | TFAR19;MGC9294                  |             |              | induction    |
| GI_21735600-S | 1059.7  | 1178.7 | 1049   | MRPL19    | <a href="#">NM_014763.2</a> | RLX1;RPML15;MRP-                | structural  | cytosolic    | protein      |
| GI_21735601-A | 782.9   | 771.7  | 671.9  | MRPL30    | <a href="#">NM_016503.2</a> | RPML28;MGC3314;MRP-L28;MGC24095 |             |              |              |
| GI_21735601-I | 99.7    | 114.9  | 107    | MRPL30    | <a href="#">NM_016503.2</a> | RPML28;MGC3314;MRP-L28;MGC24095 |             |              |              |
| GI_21735603-I | 338.4   | 311.9  | 278.1  | MRPL30    | <a href="#">NM_145212.1</a> | RPML28;MGC3314;MRP-L28;MGC24095 |             |              |              |
| GI_21735607-I | 2763.4  | 3133.3 | 2289.7 | MRPL33    | <a href="#">NM_004891.2</a> | C2orf1;RPL33L;MGC13694;MGC23922 | structural  | ribosome     | protein      |
| GI_21735608-A | 3938.8  | 5140   | 4269.6 | MRPL33    | <a href="#">NM_145330.1</a> | C2orf1;RPL33L;MGC13694;MGC23922 | structural  | ribosome     | protein      |
| GI_21735610-S | 568.4   | 714.2  | 666.1  | MRPL44    | <a href="#">NM_022915.2</a> | FLJ12701;FLJ13990               | double-     | intracellula | RNA          |
| GI_21735615-I | 107.4   | 102.5  | 99.1   | APOL1     | <a href="#">NM_145343.1</a> | APOL;APO-L;APOL-I               | high-       | extracellul  | lipid        |
| GI_21735617-A | 316.7   | 461.1  | 347.1  | APOL1     | <a href="#">NM_145344.1</a> | APOL;APO-L;APOL-I               | high-       | extracellul  | lipid        |
| GI_21735619-S | 4923.9  | 5702.9 | 5188.3 | MDH1      | <a href="#">NM_005917.2</a> | MDHA;MOR2;MDH-s;MGC:1375        | malic       | cytosol      | tricarboxyli |
| GI_21735620-S | 10245.3 | 11966  | 9955.2 | MDH2      | <a href="#">NM_005918.2</a> | MDH;MOR1;M-MDH;MGC:3559         | oxidoredu   | mitochond    | tricarboxyli |
| GI_21735622-S | 139     | 148.8  | 135.2  | NTSR2     | <a href="#">NM_012344.2</a> | NTR2                            | G-protein   | integral to  | sensory      |
| GI_21735623-A | 5543.3  | 7042.8 | 6212.9 | YWHAZ     | <a href="#">NM_003406.2</a> | KCIP-1                          | protein     |              |              |
| GI_21735623-I | 165.5   | 163.9  | 149.3  | YWHAZ     | <a href="#">NM_003406.2</a> | KCIP-1                          | protein     |              |              |
| GI_21902518-S | 1015.8  | 1160.9 | 1060.9 | PCNX      | <a href="#">NM_014982.1</a> | KIAA0805;KIAA0995               |             | integral to  |              |
| GI_21902536-S | 221.8   | 208.4  | 183.4  | ISYNA1    | <a href="#">NM_016368.3</a> |                                 |             |              |              |
| GI_21914861-A | 2100    | 2236.3 | 1961.1 | CECR5     | <a href="#">NM_017829.4</a> | FLJ20454                        |             |              |              |
| GI_21914880-S | 728.4   | 1232.8 | 380.1  | LGMN      | <a href="#">NM_005606.3</a> | LGMN1;PRSC1                     | legumain    | lysosome     | proteolysis  |
| GI_21914924-S | 103.5   | 97.1   | 86.5   | PDZK7     | <a href="#">NM_024895.3</a> | FLJ23209;bA108L7.8              |             |              |              |
| GI_21918830-S | 1711.5  | 1967   | 971.7  | NFE2L3    | <a href="#">NM_004289.4</a> | NRF3                            | transcripti | nucleus      | transcripti  |
| GI_21918871-S | 237.4   | 254.2  | 241.4  | LACE1     | <a href="#">NM_145315.2</a> | LACE-1                          |             |              |              |
| GI_21945057-S | 272.4   | 333.9  | 311.7  | LOC201158 | <a href="#">NM_145301.1</a> |                                 | DNA         | nucleus      | regulation   |
| GI_21945060-A | 167.7   | 203.7  | 169.7  | ZNF258    | <a href="#">NM_145310.1</a> | MYM;ZNF198L4                    | DNA         |              | developm     |
| GI_21945060-I | 175.7   | 182.5  | 165    | ZNF258    | <a href="#">NM_145310.1</a> | MYM;ZNF198L4                    | DNA         |              | developm     |
| GI_21955121-S | 182.2   | 233.5  | 194.9  | LOC94431  | <a href="#">NM_145237.1</a> |                                 |             |              |              |
| GI_21955153-I | 141.9   | 150.4  | 155    | NALP12    | <a href="#">NM_144687.1</a> | RNO2;PYPAF7                     |             |              |              |
| GI_21955169-I | 588.6   | 717.8  | 572.4  | SSBP3     | <a href="#">NM_145716.1</a> | SSDP;SSDP1;SSDP3;FLJ10355       | single-     | nucleus      | regulation   |
| GI_21955171-S | 877.5   | 905.6  | 685.6  | PHLDB2    | <a href="#">NM_145753.1</a> | LL5b;LL5beta;FLJ21791           |             |              |              |
| GI_21955236-S | 111.5   | 103.5  | 98.3   | STI2      | <a href="#">NM_145755.1</a> |                                 |             |              |              |
| GI_21955238-S | 94.5    | 92.3   | 102    | ZNF396    | <a href="#">NM_145756.1</a> | FLJ31213                        | transcripti | nucleus      | regulation   |
| GI_21956638-S | 390.1   | 456    | 707.5  | ABTB2     | <a href="#">NM_145804.1</a> | DKFZP586C1619                   | protein     |              |              |
| GI_21956640-S | 157.9   | 152.7  | 154    | ISL2      | <a href="#">NM_145805.1</a> | FLJ10160                        | transcripti | nucleus      | regulation   |
| GI_21956644-S | 883.8   | 1122.1 | 933.8  | MTPN      | <a href="#">NM_145808.1</a> | V-1;GCDP                        | protein     | cellular_co  | regulation   |
| GI_21956646-S | 108.7   | 120.3  | 99.9   | LOC220594 | <a href="#">NM_145809.1</a> |                                 | cysteine-   |              | ubiquitin-   |
| GI_22001414-S | 27119.1 | 17692  | 22377  | RIS1      | <a href="#">NM_015444.1</a> | p40BBP;DKFZp586E1621            |             |              |              |
| GI_22001416-S | 175.7   | 202    | 172.4  | GEMIN5    | <a href="#">NM_015465.1</a> | DKFZP586M1824                   | pre-mRNA    | spliceoso    | nuclear      |
| GI_22001419-S | 271.8   | 318.4  | 276    | C21orf29  | <a href="#">NM_144991.2</a> | TSPEAR;MGC11251                 | structural  |              | cell         |
| GI_22003857-S | 329.5   | 215.1  | 150.5  | FLJ12604  | <a href="#">NM_024621.1</a> | KIAA1692                        |             |              |              |
| GI_22004646-S | 96.3    | 91.8   | 96     | FLJ38819  | <a href="#">NM_145865.1</a> |                                 |             |              |              |
| GI_22024384-S | 3296    | 3771.1 | 2672.6 | FPGS      | <a href="#">NM_004957.2</a> |                                 | tetrahydrof | cytosol      | nucleobas    |



|               |        |        |        |         |                             |                                      |             |              |             |
|---------------|--------|--------|--------|---------|-----------------------------|--------------------------------------|-------------|--------------|-------------|
| GI_22027467-S | 235    | 288.4  | 271.2  | TRPV3   | <a href="#">NM_145068.2</a> | VRL3                                 |             |              |             |
| GI_22027468-I | 516.9  | 529    | 481.4  | POGZ    | <a href="#">NM_015100.1</a> | KIAA0461;Nbla00003                   |             |              |             |
| GI_22027470-S | 136.9  | 107    | 125.5  | NPAS2   | <a href="#">NM_002518.2</a> | MOP4;FLJ23138                        | transcripti | central      |             |
| GI_22027474-I | 140.7  | 159.7  | 138.9  | CDIPT   | <a href="#">NM_145752.1</a> | PIS;PIS1;MGC1328                     | phosphati   | integral to  | phospholi   |
| GI_22027476-A | 448.9  | 503.4  | 600.6  | CDIPT   | <a href="#">NM_006319.2</a> | PIS;PIS1;MGC1328                     | phosphati   | integral to  | phospholi   |
| GI_22027477-A | 1154.6 | 1005.8 | 970.1  | POGZ    | <a href="#">NM_145796.1</a> | KIAA0461;Nbla00003                   |             |              |             |
| GI_22027479-S | 1540.1 | 1150.8 | 1103.8 | POGK    | <a href="#">NM_017542.3</a> | BASS2;LST003;KIAA1513;KIAA15131      |             |              |             |
| GI_22027481-S | 250.9  | 255.7  | 229.6  | NPAS1   | <a href="#">NM_002517.2</a> | MOP5                                 | transcripti | nucleus      | central     |
| GI_22027483-S | 1116   | 1477.7 | 1488.9 | CMAS    | <a href="#">NM_018686.3</a> |                                      |             |              |             |
| GI_22027484-S | 104.9  | 170.8  | 110.1  | RASD1   | <a href="#">NM_016084.3</a> | AGS1;DEXRAS1;MGC:26290               | GTPase      |              | cell growth |
| GI_22027485-S | 430.3  | 580.9  | 493.3  | RASD2   | <a href="#">NM_014310.3</a> | Rhes;TEM2;MGC:4834                   | RAS small   | cellular_co  | small       |
| GI_22027487-S | 171.6  | 140.1  | 157.8  | STEAP   | <a href="#">NM_012449.2</a> | PRSS24;STEAP1;MGC19484               | transporte  | intercellula |             |
| GI_22027491-S | 141.6  | 142.1  | 130.9  | SPANXB2 | <a href="#">NM_145664.1</a> | SPANX;SPANXB                         |             |              |             |
| GI_22027493-S | 133.4  | 158    | 133.6  | SPANXC  | <a href="#">NM_022661.2</a> | CTP11                                | molecular   | nucleus      | biological_ |
| GI_22027494-S | 101.2  | 131    | 122.6  | SPANXD  | <a href="#">NM_032417.2</a> | dJ171K16.1                           |             |              |             |
| GI_22027495-S | 120.6  | 196.8  | 140.2  | SPANXE  | <a href="#">NM_145665.1</a> |                                      |             |              |             |
| GI_22027497-S | 389.3  | 359.8  | 329.1  | CABIN1  | <a href="#">NM_012295.2</a> | CAIN;KIAA0330                        |             |              |             |
| GI_22027498-S | 143.7  | 166.5  | 164.3  | CACNG7  | <a href="#">NM_031896.3</a> |                                      | voltage-    | voltage-     | ion         |
| GI_22027499-S | 97.8   | 100.7  | 80.4   | CA8     | <a href="#">NM_004056.3</a> | CALS;CARP;CA-VIII                    | carbonate   |              | one-        |
| GI_22027504-S | 716.1  | 640.1  | 869.2  | CDC91L1 | <a href="#">NM_080476.3</a> | PIGU;MGC40420;bA346K17.2             |             | integral to  |             |
| GI_22027505-A | 201.7  | 206.3  | 203.6  | CDCA1   | <a href="#">NM_031423.2</a> | NUF2R                                |             |              |             |
| GI_22027506-I | 158.9  | 167.5  | 155.5  | CDCA1   | <a href="#">NM_145697.1</a> | NUF2R                                |             |              |             |
| GI_22027508-I | 937.7  | 825.5  | 787.5  | CDCA4   | <a href="#">NM_017955.2</a> | HEPP;FLJ20764;MGC:19517              |             |              |             |
| GI_22027510-A | 1076.9 | 1072.8 | 1317.3 | CDCA4   | <a href="#">NM_145701.1</a> | HEPP;FLJ20764;MGC:19517              |             |              |             |
| GI_22027512-I | 89.4   | 105.7  | 103.7  | CDCA7   | <a href="#">NM_031942.3</a> | JPO1;FLJ14722;FLJ14736;MGC34109      |             |              |             |
| GI_22027513-A | 580.4  | 550.4  | 278    | CDCA7   | <a href="#">NM_145810.1</a> | JPO1;FLJ14722;FLJ14736;MGC34109      |             |              |             |
| GI_22027517-A | 115.9  | 100.8  | 96     | CPVL    | <a href="#">NM_031311.2</a> | HVLP;MGC10029                        | serine      |              | proteolysis |
| GI_22027519-A | 154.4  | 173.6  | 160.3  | GNAT1   | <a href="#">NM_000172.2</a> | GBT1;GNATR                           | heterotrim  | peripheral   | vision      |
| GI_22027521-I | 87.2   | 88.2   | 98.8   | GNAT1   | <a href="#">NM_144499.1</a> | GBT1;GNATR                           | heterotrim  | peripheral   | vision      |
| GI_22027523-S | 246.2  | 275.1  | 267.4  | GNAT2   | <a href="#">NM_005272.2</a> | ACHM4;GNATC                          | heterotrim  | peripheral   | G-protein   |
| GI_22027524-S | 1034.1 | 774.3  | 660.7  | ARHGEF6 | <a href="#">NM_004840.1</a> | PIXA;COOL2;MRX46;Cool-               | Rho         | intracellula | JNK         |
| GI_22027526-A | 130.6  | 140.8  | 119.3  | ARHGEF7 | <a href="#">NM_003899.2</a> | P50;P85;PAK3;PIXB;COOL1;P50BP;P85SPR | guanyl-     |              | signal      |
| GI_22027526-I | 1030.7 | 1091.5 | 936.9  | ARHGEF7 | <a href="#">NM_003899.2</a> | P50;P85;PAK3;PIXB;COOL1;P50BP;P85SPR | guanyl-     |              | signal      |
| GI_22027527-I | 94.6   | 91.5   | 89.3   | ARHGEF7 | <a href="#">NM_145735.1</a> | P50;P85;PAK3;PIXB;COOL1;P50BP;P85SPR | guanyl-     |              | signal      |
| GI_22027529-S | 321.2  | 396.1  | 403.9  | ARH     | <a href="#">NM_015627.1</a> | ARH2;FHCB1;FHCB2;MGC34705;DKFZp586   |             |              |             |
| GI_22027531-A | 270.7  | 265.4  | 267.7  | MOCS1   | <a href="#">NM_138928.1</a> | MOCOD;MOCS1A;MOCS1B                  | catalytic   |              | Mo-         |
| GI_22027537-S | 567.6  | 729.1  | 670.6  | PDCD6IP | <a href="#">NM_013374.2</a> | AIP1;Alix;HP95;KIAA1375;MGC17003     | signal      | cytosol      | signal      |
| GI_22027539-S | 6170.5 | 7013.5 | 6347.3 | PDCD6   | <a href="#">NM_013232.2</a> | ALG-2;MGC9123                        | calcium     |              | induction   |
| GI_22027540-S | 712.6  | 629    | 601.7  | PDCD7   | <a href="#">NM_005707.1</a> | ES18;HES18;MGC22015                  | DNA         | nucleus      | regulation  |
| GI_22027542-S | 195.4  | 246.7  | 209    | CACNG1  | <a href="#">NM_000727.2</a> | CACNLG                               | dihydropyr  | voltage-     | small       |
| GI_22027543-S | 215.6  | 280.5  | 245.9  | CACNG2  | <a href="#">NM_006078.2</a> |                                      | voltage-    | voltage-     | small       |
| GI_22027545-S | 93.3   | 102.6  | 89.9   | CACNG3  | <a href="#">NM_006539.2</a> |                                      | voltage-    | voltage-     | ion         |
| GI_22027547-S | 93.9   | 111.6  | 88.1   | CACNG4  | <a href="#">NM_014405.2</a> | MGC11138;MGC24983                    | voltage-    | integral to  | small       |
| GI_22027550-A | 205    | 243.4  | 209.2  | CACNG5  | <a href="#">NM_145811.1</a> |                                      | ion         | membran      | small       |

|               |        |        |        |           |                             |                                     |            |                         |
|---------------|--------|--------|--------|-----------|-----------------------------|-------------------------------------|------------|-------------------------|
| GI_22027550-I | 158.4  | 177.7  | 153.3  | CACNG5    | <a href="#">NM_145811.1</a> | ion                                 | membran    | small                   |
| GI_22027553-I | 99.8   | 116.1  | 97     | CACNG6    | <a href="#">NM_145814.1</a> | voltage-                            | voltage-   | ion                     |
| GI_22027559-A | 96.8   | 237.2  | 103.8  | CACNG6    | <a href="#">NM_031897.2</a> | voltage-                            | voltage-   | ion                     |
| GI_22027608-A | 2359.9 | 2133.5 | 2481.1 | COL13A1   | <a href="#">NM_080815.2</a> | collagen                            | collagen   |                         |
| GI_22027610-S | 278.2  | 302.5  | 225.4  | TRAF1     | <a href="#">NM_005658.2</a> | EBI6;MGC:10353                      | cytoplasm  | protein                 |
| GI_22027613-A | 950.8  | 756.1  | 791.4  | TRAF2     | <a href="#">NM_145718.1</a> | TRAP;TRAP3;MGC:45012                |            |                         |
| GI_22027615-A | 186.7  | 175    | 159.3  | TRAF3     | <a href="#">NM_003300.2</a> | LAP1;CAP-1;CRAF1;CD40bp             | signal     | kinesin induction       |
| GI_22027621-I | 128.6  | 140.8  | 165.8  | TRAF4     | <a href="#">NM_004295.2</a> | CART1;MLN62;RNF83                   | DNA        | nucleus signal          |
| GI_22027623-A | 304    | 437.7  | 390.7  | TRAF4     | <a href="#">NM_145751.1</a> | CART1;MLN62;RNF83                   | DNA        | nucleus signal          |
| GI_22027625-I | 319    | 408.4  | 372.3  | TRAF5     | <a href="#">NM_004619.2</a> | RNF84;MGC:39780                     | zinc ion   | kinesin signal          |
| GI_22027626-A | 500.8  | 455.1  | 240.4  | TRAF5     | <a href="#">NM_145759.1</a> | RNF84;MGC:39780                     | zinc ion   | kinesin signal          |
| GI_22027626-I | 126.6  | 148.3  | 152.9  | TRAF5     | <a href="#">NM_145759.1</a> | RNF84;MGC:39780                     | zinc ion   | kinesin signal          |
| GI_22027628-A | 205.1  | 233.7  | 264.5  | TRAF6     | <a href="#">NM_004620.2</a> | RNF85;MGC:3310                      | nucleic    | signal                  |
| GI_22027629-I | 98.4   | 119    | 114.1  | TRAF6     | <a href="#">NM_145803.1</a> | RNF85;MGC:3310                      | nucleic    | signal                  |
| GI_22027631-I | 87.9   | 100    | 89.1   | DGKB      | <a href="#">NM_004080.1</a> | DGK;DAGK2;DGK-BETA;KIAA0718         | ATP        | plasma protein          |
| GI_22027633-A | 122.1  | 109.9  | 119.9  | DGKB      | <a href="#">NM_145695.1</a> | DGK;DAGK2;DGK-BETA;KIAA0718         | ATP        | plasma protein          |
| GI_22027633-I | 85.4   | 93.1   | 98.4   | DGKB      | <a href="#">NM_145695.1</a> | DGK;DAGK2;DGK-BETA;KIAA0718         | ATP        | plasma protein          |
| GI_22027637-I | 136.5  | 165.6  | 155.5  | DMN       | <a href="#">NM_145728.1</a> | SYN;KIAA0353                        | structural | intermedia              |
| GI_22027639-S | 641.5  | 1427.2 | 1267.9 | HIST2H2BE | <a href="#">NM_003528.2</a> | H2B;GL105;H2B.1;H2B/q;H2BFQ         | DNA        | chromoso nucleoso       |
| GI_22027640-S | 1513   | 2502.3 | 2405.1 | H3F3A     | <a href="#">NM_002107.2</a> | H3F3;H3.3A                          |            |                         |
| GI_22027643-S | 191    | 171.8  | 126.2  | KLK1      | <a href="#">NM_002257.2</a> | KLKR;Kik6                           | tissue     | cellular_co proteolysis |
| GI_22027645-S | 197.1  | 245.5  | 224    | AMOTL1    | <a href="#">NM_130847.1</a> | JEAP                                |            |                         |
| GI_22027647-S | 1377.9 | 1277.1 | 1381.5 | LPIN1     | <a href="#">NM_145693.1</a> | KIAA0188                            | molecular  | nucleus adipocyte       |
| GI_22027649-S | 318.6  | 209.6  | 310.8  | LPIN2     | <a href="#">NM_014646.2</a> | KIAA0249                            |            | nucleus                 |
| GI_22027652-A | 720.2  | 902.1  | 533.6  | AP1B1     | <a href="#">NM_145730.1</a> | ADTB1;BAM22;AP105A;CLAPB2           | vesicle    | coated pit nonselecti   |
| GI_22027654-S | 2758.5 | 1919.5 | 798.1  | AP1S2     | <a href="#">NM_003916.3</a> | DC22;SIGMA1B;MGC:1902               | protein    | clathrin endocytosi     |
| GI_22035547-S | 476    | 556.6  | 531.3  | APBA1     | <a href="#">NM_001163.2</a> | X11;X11A;MINT1;D9S411E;X11ALPHA     | vesicle    | synaptic axon           |
| GI_22035549-S | 251.8  | 264.2  | 199.3  | APBA2     | <a href="#">NM_005503.2</a> | X11L;MINT2;LIN-                     | amyloid    | pathogene               |
| GI_22035551-S | 970.2  | 962.6  | 906.4  | APBA3     | <a href="#">NM_004886.2</a> | X11L2;mint3;MGC:15815               | protein    | membran intracellula    |
| GI_22035552-I | 117    | 125.5  | 100.2  | APBB1     | <a href="#">NM_001164.2</a> | RIR;FE65;MGC:9072                   | protein C- | signal                  |
| GI_22035553-A | 198.2  | 253.2  | 242.9  | APBB1     | <a href="#">NM_145689.1</a> | RIR;FE65;MGC:9072                   | protein C- | signal                  |
| GI_22035553-I | 124.8  | 138.3  | 140.9  | APBB1     | <a href="#">NM_145689.1</a> | RIR;FE65;MGC:9072                   | protein C- | signal                  |
| GI_22035555-I | 116.2  | 114.9  | 120.2  | BRF1      | <a href="#">NM_001519.2</a> | BRF;hBRF;GTF3B;TAF3C;TAF3B2;TF3B90; | RNA        | transcripti tRNA        |
| GI_22035559-A | 861.8  | 725.7  | 765.3  | BRF1      | <a href="#">NM_145696.1</a> | BRF;hBRF;GTF3B;TAF3C;TAF3B2;TF3B90; | RNA        | transcripti tRNA        |
| GI_22035559-I | 116.9  | 131.4  | 111.1  | BRF1      | <a href="#">NM_145696.1</a> | BRF;hBRF;GTF3B;TAF3C;TAF3B2;TF3B90; | RNA        | transcripti tRNA        |
| GI_22035561-S | 573.8  | 510.9  | 385    | BRF2      | <a href="#">NM_018310.2</a> | BRFU;FLJ11052;TFIIIB50              |            |                         |
| GI_22035563-A | 119.2  | 116.2  | 106.4  | C21orf66  | <a href="#">NM_058191.2</a> | GCFC;BM-020                         |            |                         |
| GI_22035568-I | 214.3  | 235    | 203.9  | C21orf66  | <a href="#">NM_013329.2</a> | GCFC;BM-020                         |            |                         |
| GI_22035573-A | 151.8  | 164.1  | 154.3  | 3-Sep     | <a href="#">NM_145734.1</a> | SEP3;bK250D10.3                     |            |                         |
| GI_22035582-I | 146.3  | 144    | 169.2  | DONSON    | <a href="#">NM_017613.2</a> | B17;C21ORF60;DKFZP434M035           | molecular  | cellular_co biological_ |
| GI_22035585-A | 370.9  | 405.2  | 534.3  | DONSON    | <a href="#">NM_145795.1</a> | B17;C21ORF60;DKFZP434M035           | molecular  | cellular_co biological_ |
| GI_22035587-A | 3344.2 | 3514.8 | 3508.8 | MRPL24    | <a href="#">NM_024540.2</a> | MGC9831;MRP-L18;FLJ20917;MGC22737   | structural | ribosome protein        |
| GI_22035591-I | 245.1  | 321.8  | 239.7  | MRPL35    | <a href="#">NM_016622.2</a> |                                     |            |                         |
| GI_22035593-A | 637.2  | 652    | 491.4  | MRPL35    | <a href="#">NM_145644.1</a> |                                     |            |                         |

|               |        |        |        |        |                             |                                     |            |              |             |
|---------------|--------|--------|--------|--------|-----------------------------|-------------------------------------|------------|--------------|-------------|
| GI_22035595-S | 2703.3 | 2802.7 | 2434.7 | MRPL53 | <a href="#">NM_053050.2</a> | MGC20402                            |            |              |             |
| GI_22035596-S | 541.9  | 583.4  | 563.4  | MRPL9  | <a href="#">NM_031420.2</a> | L9mt                                | structural | ribosome     | protein     |
| GI_22035597-S | 93.9   | 103    | 91.1   | MAP3K8 | <a href="#">NM_005204.2</a> | COT;EST;ESTF;TPL2;Tpl-2;c-COT       | protein    | cytosol      | protein     |
| GI_22035599-S | 1288.7 | 1208.7 | 1673.4 | MAP4K2 | <a href="#">NM_004579.2</a> | GCK;BL44;RAB8IP                     | protein    | Golgi        | hemocyte    |
| GI_22035601-A | 6801.8 | 6528.5 | 3415.8 | MAP4K4 | <a href="#">NM_004834.2</a> | HGK;NIK;FLH21957;KIAA0687           | protein    | cellular_co  | signal      |
| GI_22035603-I | 207.2  | 260.1  | 210.6  | MAP4K4 | <a href="#">NM_145686.1</a> | HGK;NIK;FLH21957;KIAA0687           | protein    | cellular_co  | signal      |
| GI_22035607-I | 153    | 182.1  | 146.4  | OSBPL5 | <a href="#">NM_020896.2</a> | ORP5;OBPH1;FLJ31948;KIAA1534;DKFZp5 |            |              |             |
| GI_22035608-A | 369    | 321.2  | 277.7  | OSBPL5 | <a href="#">NM_145638.1</a> | ORP5;OBPH1;FLJ31948;KIAA1534;DKFZp5 |            |              |             |
| GI_22035610-I | 217.8  | 271.1  | 240.4  | OSBPL6 | <a href="#">NM_032523.2</a> | ORP6;FLJ36583                       |            |              |             |
| GI_22035611-A | 601    | 374    | 414.9  | OSBPL6 | <a href="#">NM_145739.1</a> | ORP6;FLJ36583                       |            |              |             |
| GI_22035611-I | 92.9   | 104.4  | 98.8   | OSBPL6 | <a href="#">NM_145739.1</a> | ORP6;FLJ36583                       |            |              |             |
| GI_22035613-I | 493.8  | 518    | 423.4  | OSBPL7 | <a href="#">NM_017731.3</a> | ORP7;FLJ20260                       |            |              | lipid       |
| GI_22035615-A | 121.7  | 131.4  | 123.2  | OSBPL7 | <a href="#">NM_145798.1</a> | ORP7;FLJ20260                       |            |              | lipid       |
| GI_22035617-S | 746.8  | 691    | 453    | OSBPL8 | <a href="#">NM_020841.3</a> | ORP8;KIAA1451                       |            |              |             |
| GI_22035621-A | 299.8  | 725.2  | 338.4  | ASC    | <a href="#">NM_145183.1</a> | TMS1;CARD5;PYCARD;MGC10332          | apoptosis  | intracellula | induction   |
| GI_22035623-S | 334.1  | 465.8  | 525.5  | CDS1   | <a href="#">NM_001263.2</a> | CDS                                 | diacylglyc | endoplas     | vision      |
| GI_22035625-S | 403.1  | 416.4  | 337.9  | CDS2   | <a href="#">NM_003818.2</a> |                                     | phosphati  | integral to  | phospholi   |
| GI_22035626-S | 138.8  | 139.4  | 135    | CSL4   | <a href="#">NM_016046.2</a> | p13;SKI4                            | exonuclea  | nuclear      | mRNA        |
| GI_22035627-S | 1718.8 | 1457.8 | 1884.7 | LDOC1  | <a href="#">NM_012317.2</a> | BCUR1                               |            | nucleus      | negative    |
| GI_22035628-A | 122.2  | 135.2  | 125.3  | LTC4S  | <a href="#">NM_145867.1</a> | MGC33147                            | leukotrien | microsom     | glutathion  |
| GI_22035630-I | 131.8  | 124.7  | 114.9  | LTC4S  | <a href="#">NM_000897.2</a> | MGC33147                            | leukotrien | microsom     | glutathion  |
| GI_22035632-I | 232.2  | 321.1  | 281.7  | MGST1  | <a href="#">NM_020300.3</a> | MGST;GST12;MGST-I;MGC14525          | glutathion | microsom     |             |
| GI_22035633-I | 86.7   | 93.5   | 81.9   | MGST1  | <a href="#">NM_145764.1</a> | MGST;GST12;MGST-I;MGC14525          | glutathion | microsom     |             |
| GI_22035635-I | 107.7  | 130.3  | 103.5  | MGST1  | <a href="#">NM_145791.1</a> | MGST;GST12;MGST-I;MGC14525          | glutathion | microsom     |             |
| GI_22035637-A | 1116.7 | 1622.1 | 1251.2 | MGST1  | <a href="#">NM_145792.1</a> | MGST;GST12;MGST-I;MGC14525          | glutathion | microsom     |             |
| GI_22035639-S | 141.5  | 140.4  | 124.2  | MGST2  | <a href="#">NM_002413.3</a> | GST2;MGST-II;MGC14097               | glutathion | microsom     | leukotrien  |
| GI_22035640-S | 4412.8 | 3461.2 | 4415   | MGST3  | <a href="#">NM_004528.2</a> | GST-III                             | peroxidase | microsom     | lipid       |
| GI_22035645-A | 174.4  | 310.1  | 139.6  | APOL3  | <a href="#">NM_145640.1</a> | CG12-1;APOLIII                      | apolipopro |              | inflammat   |
| GI_22035647-I | 122.8  | 148.2  | 117.8  | APOL3  | <a href="#">NM_145641.1</a> | CG12-1;APOLIII                      | apolipopro |              | inflammat   |
| GI_22035651-I | 273.9  | 362.8  | 313.3  | APOL3  | <a href="#">NM_014349.2</a> | CG12-1;APOLIII                      | apolipopro |              | inflammat   |
| GI_22035652-I | 118.1  | 137.1  | 123.4  | APOL2  | <a href="#">NM_145637.1</a> | APOL-II                             | high-      | intracellula | lipid       |
| GI_22035654-A | 146.3  | 187.5  | 172.9  | APOL2  | <a href="#">NM_030882.2</a> | APOL-II                             | high-      | intracellula | lipid       |
| GI_22035654-I | 107.7  | 98.2   | 102.6  | APOL2  | <a href="#">NM_030882.2</a> | APOL-II                             | high-      | intracellula | lipid       |
| GI_22035658-A | 116    | 109.9  | 105.6  | APOL4  | <a href="#">NM_145661.1</a> | APOLIV;APOL-IV                      |            |              |             |
| GI_22035658-I | 162.5  | 203.1  | 176.5  | APOL4  | <a href="#">NM_145661.1</a> | APOLIV;APOL-IV                      |            |              |             |
| GI_22035660-S | 140.4  | 144.5  | 146.3  | APOL6  | <a href="#">NM_030641.2</a> | APOL-VI                             | lipid      | cytoplasm    | lipid       |
| GI_22035661-I | 102.6  | 107.3  | 98     | LPAL2  | <a href="#">NM_024492.2</a> | APOARGC                             | molecular  | cellular_co  | biological_ |
| GI_22035662-A | 98.9   | 113.9  | 108.6  | LPAL2  | <a href="#">NM_145727.1</a> | APOARGC                             | molecular  | cellular_co  | biological_ |
| GI_22035662-I | 129.4  | 119.8  | 113.3  | LPAL2  | <a href="#">NM_145727.1</a> | APOARGC                             | molecular  | cellular_co  | biological_ |
| GI_22035664-S | 1046.2 | 469.9  | 389.2  | TLN2   | <a href="#">NM_015059.1</a> | KIAA0320                            | actin      | cytoskelet   | cell        |
| GI_22035666-S | 310.2  | 450.8  | 482.6  | TOB1   | <a href="#">NM_005749.2</a> | TOB;TROB;APRO6;TROB1;MGC34446       | SH3/SH2    |              | negative    |
| GI_22035667-I | 134.4  | 149.3  | 130.5  | TXNRD2 | <a href="#">NM_145747.1</a> | TR;TR3;SELZ;TRXR2;TR-BETA           | thioredoxi | mitochond    | electron    |
| GI_22035669-A | 398.4  | 249    | 211.3  | TXNRD2 | <a href="#">NM_145748.1</a> | TR;TR3;SELZ;TRXR2;TR-BETA           | thioredoxi | mitochond    | electron    |
| GI_22035669-I | 342.5  | 412.4  | 369.9  | TXNRD2 | <a href="#">NM_145748.1</a> | TR;TR3;SELZ;TRXR2;TR-BETA           | thioredoxi | mitochond    | electron    |

|               |       |       |       |           |                             |                                     |             |             |            |
|---------------|-------|-------|-------|-----------|-----------------------------|-------------------------------------|-------------|-------------|------------|
| GI_22035671-I | 173.1 | 201.9 | 180.6 | TXNRD2    | <a href="#">NM_006440.2</a> | TR;TR3;SELZ;TRXR2;TR-BETA           | thioredoxi  | mitochond   | electron   |
| GI_22035675-S | 737.2 | 672.3 | 664.8 | PPIL1     | <a href="#">NM_016059.3</a> | CYPL1;hCyPX;MGC678;PPlase;CGI-124   | cyclophilin |             | protein    |
| GI_22035676-I | 133.9 | 148.5 | 134.7 | ARID4B    | <a href="#">NM_016374.4</a> | BCAA;BRCAA1;RBP1L1;SAP180;RBBP1L1   |             |             |            |
| GI_22035678-A | 643.7 | 881.6 | 687.1 | ARID4B    | <a href="#">NM_031371.2</a> | BCAA;BRCAA1;RBP1L1;SAP180;RBBP1L1   |             |             |            |
| GI_22035680-A | 142.2 | 154.7 | 155.5 | DRF1      | <a href="#">NM_025104.2</a> | ASKL1;FLJ13087;MGC15009             |             |             |            |
| GI_22035680-I | 93.1  | 91    | 83    | DRF1      | <a href="#">NM_025104.2</a> | ASKL1;FLJ13087;MGC15009             |             |             |            |
| GI_22035681-I | 223.6 | 224.6 | 226.5 | DRF1      | <a href="#">NM_145663.1</a> | ASKL1;FLJ13087;MGC15009             |             |             |            |
| GI_22035683-S | 166.1 | 207.2 | 207.8 | AREG      | <a href="#">NM_001657.2</a> | AR;SDGF;CRDGF;MGC13647              | growth      | integral to | cell       |
| GI_22035684-S | 108   | 108.1 | 114.5 | FZD10     | <a href="#">NM_007197.2</a> | FzE7;FZ-10;hFz10                    | frizzled    | integral to | frizzled   |
| GI_22035685-S | 180.8 | 100.3 | 108.8 | FZD3      | <a href="#">NM_017412.2</a> | Fz-3;hFz3                           | frizzled    | integral to | frizzled   |
| GI_22035686-S | 108.6 | 124.8 | 113.2 | ESRRB     | <a href="#">NM_004452.2</a> | ERR2;ERRb;ESRL2;NR3B2;ERRbeta;ERRbe | ligand-     | nucleus     | regulation |
| GI_22035688-S | 157.1 | 159.6 | 143.5 | GCAT      | <a href="#">NM_014291.2</a> | KBL;MGC23053                        | acyltransf  | mitochond   | amino      |
| GI_22035689-S | 254   | 282.2 | 275.3 | SCRT1     | <a href="#">NM_031309.2</a> | SCRT                                | transcripti | nucleus     | regulation |
| GI_22035691-A | 136.2 | 156   | 139.8 | GFRA1     | <a href="#">NM_145793.1</a> | GDNFR;RET1L;RETL1;TRNR1;GDNFRA;M    | glial cell  | peripheral  | cell       |
| GI_22035699-A | 269.4 | 320.3 | 194   | SYNGR1    | <a href="#">NM_145738.1</a> | MGC:1939                            | transporte  | synaptic    | transport  |
| GI_22035699-I | 82.3  | 104.1 | 100   | SYNGR1    | <a href="#">NM_145738.1</a> | MGC:1939                            | transporte  | synaptic    | transport  |
| GI_22035701-S | 155.1 | 181.1 | 176.9 | SYNGR4    | <a href="#">NM_012451.2</a> |                                     | transporte  | synaptic    | transport  |
| GI_22040879-S | 109.8 | 122.6 | 108.3 | LOC257039 | <a href="#">XM_172230.1</a> |                                     |             |             |            |
| GI_22041538-S | 96    | 82.2  | 89.1  | LOC200842 | <a href="#">XM_115974.2</a> |                                     |             |             |            |
| GI_22041854-S | 170.9 | 195.6 | 178.3 | CAMTA1    | <a href="#">XM_042323.8</a> |                                     |             |             |            |
| GI_22042061-S | 79.3  | 101.1 | 86.2  | LOC254938 | <a href="#">XM_173120.1</a> |                                     |             |             |            |
| GI_22042087-S | 24406 | 19420 | 17068 | LOC150978 | <a href="#">XM_087062.2</a> |                                     |             |             |            |
| GI_22042250-S | 118.8 | 107.7 | 94.9  | LOC256085 | <a href="#">XM_172389.1</a> |                                     |             |             |            |
| GI_22042868-S | 117.4 | 143.9 | 134.3 | LOC253584 | <a href="#">XM_173068.1</a> |                                     |             |             |            |
| GI_22042949-S | 325.9 | 317.2 | 279.7 | KIAA1530  | <a href="#">XM_042661.5</a> |                                     |             |             |            |
| GI_22043462-S | 92.8  | 100.2 | 95.2  | LOC256483 | <a href="#">XM_173015.1</a> |                                     |             |             |            |
| GI_22044796-S | 130   | 139.5 | 137.1 | LOC256880 | <a href="#">XM_173135.1</a> |                                     |             |             |            |
| GI_22045019-S | 112.7 | 109.3 | 116.5 | LOC169831 | <a href="#">XM_095964.5</a> |                                     |             |             |            |
| GI_22046514-S | 100.7 | 117.4 | 102.6 | LOC253883 | <a href="#">XM_171154.1</a> |                                     |             |             |            |
| GI_22047129-S | 195.1 | 704.9 | 669.8 | IRX1      | <a href="#">XM_098320.3</a> |                                     |             |             |            |
| GI_22047411-S | 124.2 | 135.1 | 122.5 | LOC253314 | <a href="#">XM_171094.1</a> |                                     |             |             |            |
| GI_22047801-S | 104   | 111.3 | 102.4 | LOC253254 | <a href="#">XM_173140.1</a> |                                     |             |             |            |
| GI_22049288-S | 125.6 | 126.2 | 118.7 | LOC202378 | <a href="#">XM_114475.2</a> |                                     |             |             |            |
| GI_22049345-S | 97.2  | 100.8 | 97.1  | KIAA1061  | <a href="#">XM_048786.5</a> |                                     |             |             |            |
| GI_22049497-S | 188.9 | 235.4 | 217.2 | LOC137797 | <a href="#">XM_070613.2</a> |                                     |             |             |            |
| GI_22049632-S | 126.6 | 156.6 | 141.6 | LOC256453 | <a href="#">XM_172917.1</a> |                                     |             |             |            |
| GI_22050438-S | 282.3 | 372.5 | 416   | LOC116412 | <a href="#">XM_058097.2</a> |                                     |             |             |            |
| GI_22050996-S | 151.4 | 178.1 | 106.7 | KIAA1274  | <a href="#">XM_166125.2</a> |                                     |             |             |            |
| GI_22051590-S | 101.8 | 110.8 | 106   | LOC255809 | <a href="#">XM_172995.1</a> |                                     |             |             |            |
| GI_22053417-S | 149.9 | 172.2 | 160   | KIAA1623  | <a href="#">XM_050644.2</a> |                                     |             |             |            |
| GI_22053572-S | 537.7 | 681   | 638.2 | KIAA0841  | <a href="#">XM_049237.5</a> |                                     |             |             |            |
| GI_22053647-S | 128.9 | 141.9 | 129.8 | LOC221140 | <a href="#">XM_167908.2</a> |                                     |             |             |            |
| GI_22054253-S | 114.9 | 114   | 112.3 | LOC256096 | <a href="#">XM_173164.1</a> |                                     |             |             |            |
| GI_22054273-S | 95    | 86.3  | 80.3  | LOC253582 | <a href="#">XM_173166.1</a> |                                     |             |             |            |

|               |        |        |        |            |                             |                                   |             |             |             |
|---------------|--------|--------|--------|------------|-----------------------------|-----------------------------------|-------------|-------------|-------------|
| GI_22054302-S | 182.8  | 212.1  | 202.6  | LOC145660  | <a href="#">XM_085200.2</a> |                                   |             |             |             |
| GI_22054399-S | 122.4  | 132.5  | 127.9  | LOC145741  | <a href="#">XM_096852.2</a> |                                   |             |             |             |
| GI_22055338-S | 287.8  | 364.4  | 277.1  | KIAA1465   | <a href="#">XM_027396.5</a> |                                   |             |             |             |
| GI_22055650-S | 988.1  | 1213   | 976.5  | KIAA1600   | <a href="#">XM_049351.3</a> |                                   |             |             |             |
| GI_22055838-S | 173.5  | 146.5  | 117.1  | KIAA1024   | <a href="#">XM_044580.5</a> |                                   |             |             |             |
| GI_22056189-S | 99.8   | 100.3  | 110.8  | KIAA1233   | <a href="#">XM_032181.3</a> |                                   |             |             |             |
| GI_22056336-S | 140.4  | 155    | 143.6  | LOC253724  | <a href="#">XM_172874.1</a> |                                   |             |             |             |
| GI_22058592-S | 221.4  | 267.5  | 325    | KIAA0701   | <a href="#">XM_045423.3</a> |                                   |             |             |             |
| GI_22059218-S | 83.2   | 85.8   | 101.2  | KIAA1384   | <a href="#">XM_035405.6</a> |                                   |             |             |             |
| GI_22060272-S | 288.9  | 421.9  | 546    | LOC221424  | <a href="#">XM_168060.2</a> |                                   |             |             |             |
| GI_22060692-S | 138.3  | 190.8  | 179.1  | LOC201484  | <a href="#">XM_117100.2</a> |                                   |             |             |             |
| GI_22061507-S | 110.2  | 120.8  | 106.3  | LOC143970  | <a href="#">XM_096516.2</a> |                                   |             |             |             |
| GI_22061830-S | 147    | 212.8  | 159.7  | LOC256892  | <a href="#">XM_171424.1</a> |                                   |             |             |             |
| GI_22061836-S | 256.4  | 314    | 292.3  | LOC119695  | <a href="#">XM_061627.2</a> |                                   |             |             |             |
| GI_22062022-S | 1609.7 | 1329.3 | 1065.8 | KIAA0033   | <a href="#">XM_084530.5</a> |                                   |             |             |             |
| GI_22062495-S | 5084   | 5681.4 | 5477.2 | DKFZp762C1 | <a href="#">XM_170658.1</a> |                                   |             |             |             |
| GI_22062556-S | 157.1  | 179.5  | 167.5  | LOC254439  | <a href="#">XM_170659.1</a> |                                   |             |             |             |
| GI_22062795-S | 77     | 83.9   | 82.2   | LOC254750  | <a href="#">XM_171156.1</a> |                                   |             |             |             |
| GI_22062991-S | 136.9  | 143.6  | 126.8  | LOC255849  | <a href="#">XM_172855.1</a> |                                   |             |             |             |
| GI_22063015-S | 149.3  | 160.2  | 132.8  | LOC219873  | <a href="#">XM_166780.2</a> |                                   |             |             |             |
| GI_22063727-S | 125.7  | 118.7  | 111.3  | LOC219482  | <a href="#">XM_166834.2</a> |                                   |             |             |             |
| GI_22064848-S | 223.1  | 245    | 244.3  | LOC255244  | <a href="#">XM_171495.1</a> |                                   |             |             |             |
| GI_22066239-S | 133.6  | 118    | 120.1  | LOC253013  | <a href="#">XM_171892.1</a> |                                   |             |             |             |
| GI_22066626-S | 96     | 99.4   | 85.1   | LOC255725  | <a href="#">XM_171528.1</a> |                                   |             |             |             |
| GI_22067432-S | 128.4  | 134.8  | 148.5  | KIAA1348   | <a href="#">XM_043826.5</a> |                                   |             |             |             |
| GI_22068066-S | 145    | 172.3  | 146.6  | LOC197317  | <a href="#">XM_117014.2</a> |                                   |             |             |             |
| GI_22068828-S | 150.1  | 214.6  | 151.6  | LOC150371  | <a href="#">XM_086879.2</a> |                                   |             |             |             |
| GI_22070290-S | 130.1  | 145.8  | 134.2  | LOC146599  | <a href="#">XM_085517.3</a> |                                   |             |             |             |
| GI_22091444-S | 148.9  | 178.5  | 169.2  | GFRA2      | <a href="#">NM_001495.3</a> | NTNRA;RETL2;TRNR2;GDNFRB;NRTNR-   | glial cell  | peripheral  | transmem    |
| GI_22091446-A | 83.9   | 99     | 88.5   | GFRA4      | <a href="#">NM_022139.2</a> |                                   | receptor    | membran     |             |
| GI_22091447-I | 219.9  | 229.9  | 212.9  | GFRA4      | <a href="#">NM_145762.1</a> |                                   | receptor    | membran     |             |
| GI_22091451-S | 108    | 118.4  | 123    | APOM       | <a href="#">NM_019101.2</a> | G3a;NG20;HSPC336;MGC:22400        | apolipopro  | integral to | membran     |
| GI_22091453-S | 87.9   | 99.1   | 97.3   | GSTA1      | <a href="#">NM_145740.1</a> | GST2;GTH1;GSTA1-1                 | glutathion  | cytoplasm   | glutathion  |
| GI_22091455-S | 255.1  | 253    | 258.4  | SYNGR2     | <a href="#">NM_004710.2</a> |                                   | transporte  | synaptic    | transport   |
| GI_22091456-S | 210.5  | 285.5  | 290.2  | SYNGR3     | <a href="#">NM_004209.4</a> | MGC:20003                         |             | integral to |             |
| GI_22091457-S | 132.8  | 162.4  | 126.4  | APOA5      | <a href="#">NM_052968.2</a> | RAP3;APOAV;APOA-V                 | lipid       |             | lipid       |
| GI_22091458-S | 1605.6 | 1687.6 | 1599   | PES1       | <a href="#">NM_014303.2</a> | PES                               |             | kinesin     | embryoge    |
| GI_22091459-S | 2681.4 | 4146.6 | 3821.7 | RBX1       | <a href="#">NM_014248.2</a> | ROC1;RNF75;MGC1481;MGC13357;BA554 | eukaryotic  | ubiquitin   | ubiquitin-  |
| GI_22094078-S | 2550   | 2609.7 | 2414.7 | TRIP3      | <a href="#">NM_004773.1</a> | ZNHIT3                            | transcripti |             | transcripti |
| GI_22094120-S | 500.5  | 461.8  | 364.6  | KIAA0648   | <a href="#">NM_015200.1</a> | SCC-112                           |             |             |             |
| GI_22094124-S | 101.5  | 103.6  | 99.6   | ZFP28      | <a href="#">NM_020828.1</a> | KIAA1431                          |             |             |             |
| GI_22094134-S | 131.9  | 111.5  | 133.5  | DOT1L      | <a href="#">NM_032482.1</a> | DOT1;KIAA1814                     | histone-    | nucleus     | regulation  |
| GI_22094142-I | 287.7  | 194    | 147.1  | NEK11      | <a href="#">NM_024800.2</a> | FLJ23495                          | protein-    |             | protein     |
| GI_22094986-S | 331.8  | 411.3  | 572.6  | raptor     | <a href="#">NM_020761.1</a> | KIAA1303                          |             |             |             |

|               |        |        |        |           |                             |                                     |            |                         |
|---------------|--------|--------|--------|-----------|-----------------------------|-------------------------------------|------------|-------------------------|
| GI_22095330-S | 1051.4 | 1719.2 | 1376.3 | KIAA0090  | <a href="#">NM_015047.1</a> |                                     |            |                         |
| GI_22095338-S | 1336   | 2174.5 | 1700.1 | PGK1      | <a href="#">NM_000291.2</a> | PGKA                                | phosphogl  | glycolysis              |
| GI_22095339-S | 480    | 1024.7 | 733.6  | KCNJ2     | <a href="#">NM_000891.2</a> | IRK1;LQT7;HHRK1;KIR2.1;HHBIRK1      | inward     | membran potassium       |
| GI_22095341-S | 1674.1 | 1480.5 | 1407.2 | CCT6A     | <a href="#">NM_001762.2</a> | CCT6;Cctz;HTR3;TCPZ;TCP20;TTCP20    | chaperone  | cytoplasm protein       |
| GI_22095346-S | 439.2  | 2100.7 | 5024.7 | IGSF4     | <a href="#">NM_014333.2</a> | BL2;ST17;NECL2;TSLC1;SYNCAM         |            |                         |
| GI_22095348-S | 344.1  | 393.3  | 404.5  | WDTC1     | <a href="#">NM_015023.2</a> | KIAA1037                            |            |                         |
| GI_22095350-S | 449.8  | 452.4  | 418.1  | XPO7      | <a href="#">NM_015024.2</a> | RANBP16;KIAA0745                    | protein    | nuclear protein-        |
| GI_22095352-S | 149.5  | 151.7  | 157.1  | BCAS3     | <a href="#">NM_017679.2</a> | MAAB;GAOB1;MGC4973;FLJ20128         |            | nucleus cell growth     |
| GI_22095354-S | 460.3  | 352.3  | 329.8  | BIVM      | <a href="#">NM_017693.2</a> |                                     |            |                         |
| GI_22095357-S | 301.8  | 309.1  | 254.2  | C12orf4   | <a href="#">NM_020374.2</a> |                                     |            |                         |
| GI_22095359-S | 128.4  | 135.1  | 124.4  | CD209     | <a href="#">NM_021155.2</a> | CDSIGN;DC-SIGN;DC-SIGN1             |            |                         |
| GI_22095361-S | 428.4  | 463.5  | 381.1  | C9orf19   | <a href="#">NM_022343.2</a> | GAPR-1;GLIPR2                       |            |                         |
| GI_22095362-S | 2178.7 | 1542.1 | 1047.4 | C14orf135 | <a href="#">NM_022495.2</a> | FLJ12799                            |            |                         |
| GI_22095364-S | 273.8  | 328.7  | 287.3  | RANBP17   | <a href="#">NM_022897.2</a> |                                     | GTP        | nuclear protein-        |
| GI_22095366-S | 169.3  | 210.3  | 173.6  | FLJ13386  | <a href="#">NM_025180.2</a> |                                     |            |                         |
| GI_22095370-S | 790.2  | 917    | 704.6  | RUFY1     | <a href="#">NM_025158.2</a> | ZFYVE12;FLJ22251                    | zinc ion   | electron                |
| GI_22095372-S | 123.5  | 129.3  | 133.5  | MGC10986  | <a href="#">NM_030576.2</a> |                                     | electron   | electron                |
| GI_22095373-S | 1985.8 | 4601.1 | 1404.4 | LOXL3     | <a href="#">NM_032603.2</a> |                                     | protein-   | membran biological_     |
| GI_22095374-S | 105.3  | 111.3  | 107    | PTPN5     | <a href="#">NM_032781.2</a> | STEP;PTPSTEP;FLJ14427               | prenylated | integral to protein     |
| GI_22095383-S | 550.5  | 556.3  | 456.3  | RBM15     | <a href="#">NM_022768.3</a> | OTT;SPEN;FLJ12479;FLJ21943          | RNA        | cell growth             |
| GI_22095387-S | 149.1  | 181.5  | 161.4  | ALS2CR15  | <a href="#">NM_138468.3</a> | DKFZp434E1919                       |            |                         |
| GI_22095394-S | 3127.9 | 3366.5 | 2911.9 | DPCK      | <a href="#">NM_025233.3</a> | NBP;PPAT;UKR1;CoASY;pOV-2           | nucleotide | cellular_co biological_ |
| GI_22095396-S | 163.9  | 165.9  | 137.9  | CRELD1    | <a href="#">NM_015513.2</a> | AVSD2;CIRRIN;DKFZP566D213           |            |                         |
| GI_22129771-S | 97.6   | 131.4  | 70.4   | PF20      | <a href="#">NM_024532.2</a> | WDR29;FLJ22724;DKFZp666P1710        |            |                         |
| GI_22129777-S | 3250.9 | 2733.7 | 1429.9 | C20orf139 | <a href="#">NM_080725.1</a> | dJ850E9.2                           | DNA        | extrachro               |
| GI_22165415-A | 249.6  | 276.3  | 240.5  | GALT      | <a href="#">NM_000155.2</a> |                                     | UTP-       | galactose               |
| GI_22165415-I | 730.3  | 720.5  | 613.3  | GALT      | <a href="#">NM_000155.2</a> |                                     | UTP-       | galactose               |
| GI_22165417-I | 123.1  | 136.6  | 143.3  | GALT      | <a href="#">NM_147131.1</a> |                                     | UTP-       | galactose               |
| GI_22165421-S | 101    | 81.9   | 82.2   | AQP3      | <a href="#">NM_004925.3</a> |                                     | transporte | membran small           |
| GI_22165422-I | 107.7  | 111    | 104.4  | DCTN3     | <a href="#">NM_024348.2</a> | DCTN22;DCTN-22                      | structural | dynactin cytokinesi     |
| GI_22165423-A | 1443.2 | 1846.6 | 2115.6 | DCTN3     | <a href="#">NM_007234.3</a> | DCTN22;DCTN-22                      | structural | dynactin cytokinesi     |
| GI_22165424-S | 111.2  | 115.4  | 105.1  | CCL19     | <a href="#">NM_006274.2</a> | ELC;CKb11;MIP3B;MIP-                | chemokin   | extracellul chemotaxi   |
| GI_22165425-S | 259.3  | 293.7  | 289.2  | CCL21     | <a href="#">NM_002989.2</a> | SLC;CKb9;TCA4;SCYA21;MGC34555       | chemokin   | extracellul chemotaxi   |
| GI_22165426-S | 94.7   | 107.1  | 113.7  | CCL24     | <a href="#">NM_002991.2</a> | Ckb-6;MPIF2;MPIF-2;SCYA24           | chemokin   | extracellul chemotaxi   |
| GI_22165428-S | 136.1  | 153.9  | 140.6  | CCL27     | <a href="#">NM_006664.2</a> | ALP;ILC;CTAK;CTACK;PESKY;ESKINE;SCY | chemokin   | extracellul chemotaxi   |
| GI_22165429-A | 6568.5 | 6162.1 | 5865.8 | ANXA11    | <a href="#">NM_001157.2</a> | ANX11;CAP50                         | phospholi  | cytoplasm immune        |
| GI_22165432-I | 98.9   | 99.4   | 93.4   | ANXA11    | <a href="#">NM_145869.1</a> | ANX11;CAP50                         | phospholi  | cytoplasm immune        |
| GI_22202605-A | 154.4  | 179.4  | 164.8  | BVES      | <a href="#">NM_147147.1</a> | POP1;HBVES;POPDC1;MGC42413          |            | integral to muscle      |
| GI_22202605-I | 100.9  | 120.9  | 101.4  | BVES      | <a href="#">NM_147147.1</a> | POP1;HBVES;POPDC1;MGC42413          |            | integral to muscle      |
| GI_22202607-I | 112.3  | 119.3  | 107.4  | BVES      | <a href="#">NM_007073.2</a> | POP1;HBVES;POPDC1;MGC42413          |            | integral to muscle      |
| GI_22202610-S | 1424.9 | 1817.8 | 1617.7 | CPD       | <a href="#">NM_001304.3</a> |                                     | carboxype  | integral to proteolysis |
| GI_22202613-I | 258    | 232.4  | 243.9  | CRYZL1    | <a href="#">NM_145311.1</a> | 4P11;QOH-1                          | NADPH:q    |                         |
| GI_22202615-I | 138.2  | 139.7  | 139.4  | CRYZL1    | <a href="#">NM_145858.1</a> | 4P11;QOH-1                          | NADPH:q    |                         |
| GI_22202617-I | 159.9  | 176.2  | 181.9  | CTSL      | <a href="#">NM_001912.2</a> | MEP;CATL                            | cathepsin  | lysosome proteolysis    |

|               |        |        |        |         |                             |                                     |             |              |              |
|---------------|--------|--------|--------|---------|-----------------------------|-------------------------------------|-------------|--------------|--------------|
| GI_22202618-A | 3640.7 | 3166.6 | 5188.1 | CTSL    | <a href="#">NM_145918.1</a> | MEP;CATL                            | cathepsin   | lysosome     | proteolysis  |
| GI_22202620-S | 100.3  | 92.7   | 85     | GSTA2   | <a href="#">NM_000846.3</a> | GST2;GTA2;GTH2;GSTA2-2;MGC10525     | glutathion  |              | glutathion   |
| GI_22202621-I | 140.4  | 125.3  | 129.4  | GSTZ1   | <a href="#">NM_001513.2</a> | MAI;MAAI;GSTZ1-1;MGC2029            | maleylacet  | cytoplasm    | phenylala    |
| GI_22202625-A | 330.2  | 387.9  | 385.7  | GSTZ1   | <a href="#">NM_145871.1</a> | MAI;MAAI;GSTZ1-1;MGC2029            | maleylacet  | cytoplasm    | phenylala    |
| GI_22202627-I | 176.8  | 216.8  | 224.4  | PDCD8   | <a href="#">NM_004208.2</a> | AIF                                 | electron    | mitochond    | DNA          |
| GI_22202628-I | 114.2  | 106.6  | 101.5  | PDCD8   | <a href="#">NM_145812.1</a> | AIF                                 | electron    | mitochond    | DNA          |
| GI_22202630-A | 277.7  | 370.3  | 405.4  | PDCD8   | <a href="#">NM_145813.1</a> | AIF                                 | electron    | mitochond    | DNA          |
| GI_22202636-A | 8718.7 | 8984.2 | 7766.5 | PFDN5   | <a href="#">NM_145897.1</a> | MM1;MM-1;PFD5;MGC5329               | transcripti | nucleus      | regulation   |
| GI_22203764-S | 164.3  | 401.4  | 452.2  | GALNT12 | <a href="#">NM_024642.2</a> | FLJ21212                            | transferas  |              |              |
| GI_22208950-A | 851.4  | 1026.4 | 873.4  | ASB3    | <a href="#">NM_145863.1</a> | ASB-                                |             |              | intracellula |
| GI_22208952-I | 251.4  | 283.8  | 218.1  | ASB3    | <a href="#">NM_016115.3</a> | ASB-                                |             |              | intracellula |
| GI_22208953-S | 130.1  | 136    | 139.4  | ASB10   | <a href="#">NM_080871.2</a> |                                     |             |              | intracellula |
| GI_22208954-S | 94.8   | 103.4  | 100.6  | ASB12   | <a href="#">NM_130388.2</a> | FLJ39577                            |             |              |              |
| GI_22208956-S | 239.1  | 233.5  | 227.2  | ASB13   | <a href="#">NM_024701.2</a> | FLJ13134;MGC19879                   |             |              | intracellula |
| GI_22208961-S | 761.7  | 744.1  | 823.3  | ASB1    | <a href="#">NM_016114.3</a> | ASB-1;KIAA1146;MGC11165             | molecular   | intracellula | intracellula |
| GI_22208962-S | 405    | 627.5  | 479.5  | ASB2    | <a href="#">NM_016150.3</a> | ASB-2;MGC40044                      |             |              | signal       |
| GI_22208963-I | 86.6   | 96.5   | 88.1   | ASB4    | <a href="#">NM_145872.1</a> | ASB-4                               |             |              |              |
| GI_22208965-S | 92.4   | 90     | 84.8   | ASB5    | <a href="#">NM_080874.2</a> |                                     |             |              | intracellula |
| GI_22208974-A | 2605.5 | 1624.6 | 2925.4 | HMGA1   | <a href="#">NM_145903.1</a> | HMG-                                | AT DNA      |              | regulation   |
| GI_22208976-I | 103.7  | 101.1  | 97.2   | HMGA1   | <a href="#">NM_145904.1</a> | HMG-                                | AT DNA      |              | regulation   |
| GI_22208978-I | 122.3  | 120.5  | 114.6  | HMGA1   | <a href="#">NM_145905.1</a> | HMG-                                | AT DNA      |              | regulation   |
| GI_22208981-I | 95.6   | 112.1  | 102.4  | KLK10   | <a href="#">NM_002776.3</a> | NES1;PRSSL1                         | serine-     | extracellul  | cell growth  |
| GI_22208983-A | 91.6   | 88.2   | 89.6   | KLK10   | <a href="#">NM_145888.1</a> | NES1;PRSSL1                         | serine-     | extracellul  | cell growth  |
| GI_22208988-A | 154.7  | 170.1  | 149.1  | KLK12   | <a href="#">NM_145895.1</a> | KLK-L5                              |             |              |              |
| GI_22208990-I | 110.6  | 122.6  | 109.9  | KLK3    | <a href="#">NM_001648.2</a> | APS;PSA                             | serine-     |              |              |
| GI_22208991-A | 253.4  | 293.3  | 254.2  | KLK3    | <a href="#">NM_145864.1</a> | APS;PSA                             | serine-     |              |              |
| GI_22208991-I | 474.6  | 525.6  | 446.6  | KLK3    | <a href="#">NM_145864.1</a> | APS;PSA                             | serine-     |              |              |
| GI_22208993-S | 200.4  | 217.5  | 195.9  | KLK5    | <a href="#">NM_012427.3</a> | SCTE;KLKL2;KLK-L2                   | serine-     | extracellul  | epidermal    |
| GI_22208996-S | 953.3  | 741    | 678.6  | BBS2    | <a href="#">NM_031885.2</a> | BBS;MGC20703                        | cell        | integrin     | cell-matrix  |
| GI_22208998-S | 99.4   | 110.9  | 111.5  | JRK     | <a href="#">NM_003724.1</a> | JH8                                 |             |              |              |
| GI_22209000-S | 292.3  | 286    | 259.2  | TIGD1   | <a href="#">NM_145702.1</a> | EEYORE                              |             |              |              |
| GI_22209002-S | 200.2  | 249.6  | 219.9  | P11     | <a href="#">NM_006025.2</a> | PP11;PRSS26-PENDING                 | serine-     | extracellul  | proteolysis  |
| GI_22209003-S | 111.7  | 118.2  | 112    | POPDC2  | <a href="#">NM_022135.2</a> | POP2                                | molecular   | integral to  | biological_  |
| GI_22209005-S | 127.5  | 145.4  | 132.7  | RTDR1   | <a href="#">NM_014433.2</a> | MGC16968                            | peroxidas   | cellular_co  | biological_  |
| GI_22209006-S | 702.5  | 636    | 847.2  | 1-Sep   | <a href="#">NM_052838.2</a> | LARP;SEP1;DIFF6;PNUTL3;MGC20394     | GTP         |              | cytokinesi   |
| GI_22209007-S | 1727.7 | 2335   | 2669   | SPRY2   | <a href="#">NM_005842.2</a> | hSPRY2;MGC23039                     |             | membran      | histogene    |
| GI_22209008-A | 382.5  | 311.5  | 265.1  | CHEK2   | <a href="#">NM_145862.1</a> | CDS1;CHK2;RAD53;HuCds1;PP1425;bA444 |             |              |              |
| GI_22209010-I | 83.5   | 94.7   | 79.6   | CHEK2   | <a href="#">NM_007194.2</a> | CDS1;CHK2;RAD53;HuCds1;PP1425;bA444 |             |              |              |
| GI_22212916-A | 368.1  | 485.8  | 404.6  | CNTFR   | <a href="#">NM_001842.3</a> | MGC1774                             | ciliary     | membran      | signal       |
| GI_22212917-I | 267    | 346.7  | 300.6  | CNTFR   | <a href="#">NM_147164.1</a> | MGC1774                             | ciliary     | membran      | signal       |
| GI_22212919-S | 115.8  | 114.3  | 122.1  | DNAI1   | <a href="#">NM_012144.2</a> | ICS;PCD;CILD1;MGC26204              | motor       | cilium       | microtubul   |
| GI_22212920-I | 212.9  | 293    | 198.4  | IL11RA  | <a href="#">NM_004512.3</a> | MGC2146                             | transmem    | membran      |              |
| GI_22212921-A | 233.1  | 270.2  | 210.9  | IL11RA  | <a href="#">NM_147162.1</a> | MGC2146                             | transmem    | membran      |              |
| GI_22212921-I | 239.8  | 280.8  | 248    | IL11RA  | <a href="#">NM_147162.1</a> | MGC2146                             | transmem    | membran      |              |

|               |        |        |        |           |                             |                                     |             |              |             |
|---------------|--------|--------|--------|-----------|-----------------------------|-------------------------------------|-------------|--------------|-------------|
| GI_22212923-I | 302.3  | 431.4  | 449.7  | NFX1      | <a href="#">NM_002504.3</a> | NFX2;MGC20369                       | transcripti | nucleus      | transcripti |
| GI_22212924-A | 354.5  | 343.9  | 331.1  | NFX1      | <a href="#">NM_147133.1</a> | NFX2;MGC20369                       | transcripti | nucleus      | transcripti |
| GI_22212924-I | 84.6   | 111.3  | 95.2   | NFX1      | <a href="#">NM_147133.1</a> | NFX2;MGC20369                       | transcripti | nucleus      | transcripti |
| GI_22212926-I | 470.5  | 453.2  | 415.5  | NFX1      | <a href="#">NM_147134.1</a> | NFX2;MGC20369                       | transcripti | nucleus      | transcripti |
| GI_22212935-A | 3651   | 3136.4 | 3213.4 | OPRS1     | <a href="#">NM_147158.1</a> | SR-BP1;MGC3851;SIGMAR1;FLJ25585     | drug        | integral to  |             |
| GI_22212941-S | 631.6  | 740    | 436.3  | UBAP1     | <a href="#">NM_016525.3</a> | UAP;UBAP;NAG20;MGC8710              |             |              |             |
| GI_22212942-S | 4313.3 | 3737.9 | 3506.7 | UBE2R2    | <a href="#">NM_017811.2</a> | UBC3B;CDC34B;FLJ20419;MGC10481      | ubiquitin   |              | ubiquitin   |
| GI_22218338-S | 197.3  | 249.6  | 283.9  | MGC39325  | <a href="#">NM_147189.1</a> |                                     |             |              |             |
| GI_22218340-S | 164.5  | 176.6  | 167.6  | MMP21     | <a href="#">NM_147191.1</a> |                                     | zinc ion    | extracellul  | proteolysis |
| GI_22218342-S | 203.9  | 238.9  | 207.9  | FLJ36155  | <a href="#">NM_147193.1</a> | GLIS1                               |             |              |             |
| GI_22218344-S | 903.7  | 834.9  | 655.7  | LASS5     | <a href="#">NM_147190.1</a> | Trh4;FLJ25304;MGC45411              | transcripti | nucleus      | regulation  |
| GI_22218346-S | 117.3  | 117.9  | 119.2  | TMIE      | <a href="#">NM_147196.1</a> | DFNB6                               |             |              |             |
| GI_22218352-S | 268    | 361.1  | 316.1  | MGC35361  | <a href="#">NM_147194.1</a> |                                     |             |              |             |
| GI_22218356-S | 110.9  | 102.2  | 103.4  | MRGX1     | <a href="#">NM_147199.1</a> |                                     | receptor    | integral to  | G-protein   |
| GI_22218618-S | 1012.1 | 1130.1 | 1060.4 | KIAA1892  | <a href="#">NM_015397.1</a> | MGC1058;DKFZP434O125                |             |              |             |
| GI_22218620-S | 522    | 668.8  | 639    | C9orf25   | <a href="#">NM_147202.1</a> | FLJ39031;bA573M23.5                 |             |              |             |
| GI_22219459-A | 460.9  | 539.2  | 495.4  | CREB1     | <a href="#">NM_004379.2</a> | CREB;MGC9284                        | transcripti | nucleus      | transcripti |
| GI_22219466-A | 531.5  | 545.4  | 536.2  | NUDT2     | <a href="#">NM_147173.1</a> | APAH1;MGC10404                      | bis(5'-     |              | nucleobas   |
| GI_22219470-A | 192.4  | 251.1  | 227.3  | C9orf24   | <a href="#">NM_147169.1</a> | MGC32921;MGC33614;NYD-              |             |              |             |
| GI_22219472-I | 155    | 194.7  | 154.9  | C9orf24   | <a href="#">NM_032596.3</a> | MGC32921;MGC33614;NYD-              |             |              |             |
| GI_22219473-S | 349.4  | 384.9  | 402.2  | FADD      | <a href="#">NM_003824.2</a> | MORT1;MGC8528                       | death       | cytoplasm    | induction   |
| GI_22219475-S | 156.4  | 196.3  | 185.3  | KLK14     | <a href="#">NM_022046.3</a> | KLK-L6                              | trypsin     | extracellul  | proteolysis |
| GI_22265328-S | 483.4  | 775    | 659.3  | CRADD     | <a href="#">NM_003805.2</a> | RAIDD;MGC9163                       | death       | intracellula | induction   |
| GI_22265329-I | 212.7  | 149.5  | 144.4  | NUDT2     | <a href="#">NM_001161.3</a> | APAH1;MGC10404                      | bis(5'-     |              | nucleobas   |
| GI_22267435-S | 98.2   | 104.5  | 88.4   | NIPSNAP3A | <a href="#">NM_015469.1</a> | HSPC299;FLJ13953;MGC14553;DKFZp564  |             |              |             |
| GI_22296883-S | 849    | 818.7  | 787.7  | FAM11A    | <a href="#">NM_032508.1</a> | CXorf13                             |             |              |             |
| GI_22325354-I | 2211   | 1794.7 | 759.6  | AKAP2     | <a href="#">NM_007203.3</a> | PRKA2;AKAPKL;KIAA0920;DKFZp564L0716 |             | kinesin      |             |
| GI_22325355-A | 472    | 379.4  | 285.1  | AKAP2     | <a href="#">NM_147150.1</a> | PRKA2;AKAPKL;KIAA0920;DKFZp564L0716 |             | kinesin      |             |
| GI_22325357-I | 214.2  | 265.2  | 247.3  | LRDD      | <a href="#">NM_018494.2</a> | PIDD;MGC16925                       | death       |              | signal      |
| GI_22325359-I | 92.1   | 108.3  | 89.7   | LRDD      | <a href="#">NM_145886.1</a> | PIDD;MGC16925                       | death       |              | signal      |
| GI_22325361-A | 1210.3 | 1135.4 | 1004.1 | LRDD      | <a href="#">NM_145887.1</a> | PIDD;MGC16925                       | death       |              | signal      |
| GI_22325365-A | 1225   | 1210   | 1279.6 | UBAP2     | <a href="#">NM_020867.1</a> | FLJ22435;KIAA1491;bA176F3.5         |             |              |             |
| GI_22325369-A | 658.9  | 756.8  | 736.6  | C9orf23   | <a href="#">NM_148178.1</a> | MGC29635;bA296L22.5                 |             |              |             |
| GI_22325371-I | 226.2  | 254.9  | 249.7  | C9orf23   | <a href="#">NM_148179.1</a> | MGC29635;bA296L22.5                 |             |              |             |
| GI_22325373-I | 96.7   | 104.5  | 107.3  | EDARADD   | <a href="#">NM_080738.2</a> |                                     | death       | cytoplasm    | NIK-I-      |
| GI_22325374-A | 172.3  | 245.2  | 162.6  | EDARADD   | <a href="#">NM_145861.1</a> |                                     | death       | cytoplasm    | NIK-I-      |
| GI_22325374-I | 103.1  | 112.2  | 110.2  | EDARADD   | <a href="#">NM_145861.1</a> |                                     | death       | cytoplasm    | NIK-I-      |
| GI_22325376-A | 2026.4 | 2349.2 | 2013.1 | RIOK3     | <a href="#">NM_003831.2</a> | SUDD                                | molecular   |              | chromoso    |
| GI_22325378-I | 71.4   | 83.8   | 81.7   | RIOK3     | <a href="#">NM_145906.1</a> | SUDD                                | molecular   |              | chromoso    |
| GI_22325382-A | 108.7  | 113.4  | 109.7  | ITSN2     | <a href="#">NM_147152.1</a> | SWA;SWAP;SH3D1B;SH3P18;KIAA1256     | SH3/SH2     | kinesin      | endocytosi  |
| GI_22325382-I | 97.2   | 96     | 96.6   | ITSN2     | <a href="#">NM_147152.1</a> | SWA;SWAP;SH3D1B;SH3P18;KIAA1256     | SH3/SH2     | kinesin      | endocytosi  |
| GI_22325386-I | 239.4  | 243.8  | 268.3  | FBXO26    | <a href="#">NM_024907.5</a> | FBG4;MGC9379;FLJ11798;FLJ25205      |             |              |             |
| GI_22325387-A | 765.8  | 407.1  | 473.2  | FBXO26    | <a href="#">NM_148169.1</a> | FBG4;MGC9379;FLJ11798;FLJ25205      |             |              |             |
| GI_22325387-I | 106.5  | 96.5   | 93.9   | FBXO26    | <a href="#">NM_148169.1</a> | FBG4;MGC9379;FLJ11798;FLJ25205      |             |              |             |



|               |        |        |        |           |                             |                                       |                |             |              |
|---------------|--------|--------|--------|-----------|-----------------------------|---------------------------------------|----------------|-------------|--------------|
| GI_22325389-I | 102.5  | 113.5  | 119    | OPRS1     | <a href="#">NM_147160.2</a> | SR-BP1;MGC3851;SIGMAR1;FLJ25585       | drug           | integral to |              |
| GI_22325390-S | 168.2  | 197.2  | 172.3  | TIGD6     | <a href="#">NM_030953.2</a> | DKFZP761E2110                         | DNA            | nucleus     |              |
| GI_22325391-S | 228.4  | 210.2  | 238.9  | TIGD7     | <a href="#">NM_033208.2</a> | Sancho                                | DNA            | nucleus     |              |
| GI_22380642-S | 299.1  | 351.2  | 303.4  | DSCR10    | <a href="#">NM_148676.1</a> |                                       | molecular      | cellular_co | biological_  |
| GI_22507315-S | 245.3  | 316.6  | 242.5  | SPTB      | <a href="#">NM_000347.3</a> |                                       | actin          | spectrin    | cell shape   |
| GI_22507370-I | 122.8  | 112.1  | 101.1  | AMPD2     | <a href="#">NM_004037.5</a> |                                       | AMP            | cellular_co | purine       |
| GI_22507371-S | 107.9  | 98.7   | 89.7   | CLDN19    | <a href="#">NM_148960.1</a> |                                       | structural     | tight       |              |
| GI_22507379-S | 95.5   | 89.7   | 96.7   | GPRC6A    | <a href="#">NM_148963.1</a> | bA86F4.3                              | metabotro      | membran     |              |
| GI_22507381-S | 520.2  | 436.9  | 267.1  | C20orf6   | <a href="#">NM_016649.3</a> | FLJ20368;HDCMC28P;bA526K24.1          |                |             |              |
| GI_22507386-S | 98.9   | 104.8  | 104.1  | ELA1      | <a href="#">NM_001971.3</a> |                                       | pancreatic     |             | proteolysis  |
| GI_22507387-S | 175.6  | 222.7  | 215.9  | ALG12     | <a href="#">NM_024105.2</a> | ECM39;MGC3136                         |                |             |              |
| GI_22507392-S | 158.3  | 186.4  | 143.7  | PERQ1     | <a href="#">NM_022574.2</a> | GIGYF1;AF053356-CDS2                  |                |             |              |
| GI_22507393-S | 89.3   | 82.2   | 85.3   | C20orf77  | <a href="#">NM_021215.2</a> | dJ1057B20.2;DKFZp434P0735             |                |             |              |
| GI_22507395-S | 102.2  | 95.1   | 98.1   | GJA8      | <a href="#">NM_005267.2</a> | CAE;CAE1;CX50;CZP1;MP70               | channel/p      | connexon    | vision       |
| GI_22507396-S | 5766.1 | 15463  | 10398  | MYH9      | <a href="#">NM_002473.2</a> | MHA;FTNS;DFNA17;NMMHCA                | adenosine non- |             | hearing      |
| GI_22507398-S | 121.6  | 119.1  | 105.6  | FLJ33215  | <a href="#">NM_148894.1</a> |                                       |                |             |              |
| GI_22507400-S | 109.9  | 106.4  | 101    | MDS2      | <a href="#">NM_148895.1</a> |                                       |                |             |              |
| GI_22507402-S | 112.6  | 114.4  | 110.3  | NPB       | <a href="#">NM_148896.1</a> | PPL7;PPNPB                            |                |             | neuropepti   |
| GI_22507404-S | 92.2   | 103.7  | 95.5   | SDR-O     | <a href="#">NM_148897.1</a> | RDHS                                  | oxidoredu      |             | metabolis    |
| GI_22507406-S | 89.6   | 96.4   | 97.8   | FLJ35740  | <a href="#">NM_147195.1</a> | FLJ40632                              |                |             |              |
| GI_22507408-S | 1228.5 | 1111.1 | 1184.6 | C22orf4   | <a href="#">NM_014346.1</a> | HSC79E021                             | DNA            | nucleus     | regulation   |
| GI_22507412-S | 142.6  | 154.4  | 139.7  | C20orf144 | <a href="#">NM_080825.2</a> | dJ63M2.6                              |                |             |              |
| GI_22507413-S | 125    | 139.9  | 126.6  | SRMS      | <a href="#">NM_080823.2</a> | SRM;C20orf148;dJ697K14.1              | protein-       |             | protein      |
| GI_22507414-S | 178.1  | 218    | 185    | C20orf136 | <a href="#">NM_080621.2</a> | dJ591C20.7                            |                |             |              |
| GI_22507416-S | 92.2   | 94.1   | 86.6   | PRY       | <a href="#">NM_004676.2</a> | PTPN13LY                              |                |             |              |
| GI_22535295-S | 87     | 97.7   | 95.8   | SMC1L2    | <a href="#">NM_148674.1</a> | bK268H5;SMC1BETA;bK268H5.5            | ATP            | membran     | chromoso     |
| GI_22538388-A | 101.1  | 101.3  | 96.1   | AKAP9     | <a href="#">NM_147166.1</a> | PRKA9;CG-                             | N-methyl-      | centrosom   | small        |
| GI_22538388-I | 99.7   | 103.3  | 103.6  | AKAP9     | <a href="#">NM_147166.1</a> | PRKA9;CG-                             | N-methyl-      | centrosom   | small        |
| GI_22538399-S | 141.8  | 145    | 143.1  | CCL11     | <a href="#">NM_002986.2</a> | SCYA11;MGC22554                       | chemokin       | extracellul | response     |
| GI_22538400-S | 104.2  | 110.6  | 96.2   | OAZ       | <a href="#">NM_015069.1</a> | KIAA0760                              |                |             |              |
| GI_22538402-A | 236.5  | 277.8  | 250.2  | A2BP1     | <a href="#">NM_018723.2</a> | FOX1;HRNBP1                           | RNA            | Golgi       |              |
| GI_22538402-I | 136.1  | 165    | 126.4  | A2BP1     | <a href="#">NM_018723.2</a> | FOX1;HRNBP1                           | RNA            | Golgi       |              |
| GI_22538416-I | 199.2  | 186.9  | 166.2  | OAZIN     | <a href="#">NM_015878.3</a> | OAZI;MGC691;MGC3832                   | enzyme         |             | polyamine    |
| GI_22538417-A | 905    | 814.8  | 724    | OAZIN     | <a href="#">NM_148174.1</a> | OAZI;MGC691;MGC3832                   | enzyme         |             | polyamine    |
| GI_22538419-S | 111.5  | 105.7  | 109    | AQP10     | <a href="#">NM_080429.2</a> | AQPA_HUMAN                            | transporte     | integral to | transport    |
| GI_22538421-S | 253.6  | 310.1  | 255.1  | ATF2      | <a href="#">NM_001880.2</a> | HB16;TREB7;CRE-BP1                    | RNA            |             |              |
| GI_22538424-S | 311.7  | 370.7  | 391.4  | ATPAF2    | <a href="#">NM_145691.2</a> | ATP12;ATP12p;MGC29736                 |                |             |              |
| GI_22538425-A | 464.4  | 604.5  | 511.1  | C6orf4    | <a href="#">NM_147200.1</a> | ACT1;CIKS;C6orf5;C6orf6;MGC3581;DKFZP | molecular      | cellular_co | intracellula |
| GI_22538425-I | 100.3  | 108.8  | 111.5  | C6orf4    | <a href="#">NM_147200.1</a> | ACT1;CIKS;C6orf5;C6orf6;MGC3581;DKFZP | molecular      | cellular_co | intracellula |
| GI_22538427-I | 118.9  | 137.4  | 119.2  | C6orf4    | <a href="#">NM_147686.1</a> | ACT1;CIKS;C6orf5;C6orf6;MGC3581;DKFZP | molecular      | cellular_co | intracellula |
| GI_22538429-A | 9739.1 | 8272.7 | 6743.6 | CTSB      | <a href="#">NM_001908.2</a> | APPS;CPSB                             | cathepsin      | lysosome    | proteolysis  |
| GI_22538438-I | 105.8  | 116.3  | 101.2  | CTSC      | <a href="#">NM_001814.2</a> | HMS;PLS;CPPI;DPP1;DPPI;PALS           | cysteine-      | lysosome    | proteolysis  |
| GI_22538439-A | 104    | 100.8  | 96.5   | CTSC      | <a href="#">NM_148170.1</a> | HMS;PLS;CPPI;DPP1;DPPI;PALS           | cysteine-      | lysosome    | proteolysis  |
| GI_22538439-I | 107.9  | 110.2  | 101.9  | CTSC      | <a href="#">NM_148170.1</a> | HMS;PLS;CPPI;DPP1;DPPI;PALS           | cysteine-      | lysosome    | proteolysis  |

|               |         |        |        |         |                             |                                     |             |             |             |
|---------------|---------|--------|--------|---------|-----------------------------|-------------------------------------|-------------|-------------|-------------|
| GI_22538441-S | 3609    | 4781.1 | 4903   | CTSZ    | <a href="#">NM_001336.2</a> | CTSX                                | cysteine-   | lysosome    | proteolysis |
| GI_22538443-I | 156.6   | 194    | 179.4  | TP53I3  | <a href="#">NM_004881.2</a> | PIG3                                |             |             |             |
| GI_22538445-A | 511.3   | 833.6  | 864.7  | TP53I3  | <a href="#">NM_147184.1</a> | PIG3                                |             |             |             |
| GI_22538447-S | 822.8   | 964.2  | 904.2  | PIGB    | <a href="#">NM_004855.3</a> | MGC21236                            | catalytic   | endoplas    | GPI         |
| GI_22538449-I | 108.2   | 126.9  | 108.9  | PIGQ    | <a href="#">NM_004204.2</a> | GPI1;hGPI1;MGC12693                 | transferas  | integral to | carbohydr   |
| GI_22538452-A | 207.5   | 269.5  | 213.5  | PIGQ    | <a href="#">NM_148920.1</a> | GPI1;hGPI1;MGC12693                 | transferas  | integral to | carbohydr   |
| GI_22538456-I | 122.4   | 159.1  | 137.7  | NCOA1   | <a href="#">NM_147223.1</a> | SRC1;NCoA-1;F-SRC-1                 | transcripti | nucleus     | transcripti |
| GI_22538458-A | 338.8   | 403.8  | 372.4  | NCOA1   | <a href="#">NM_147233.1</a> | SRC1;NCoA-1;F-SRC-1                 | transcripti | nucleus     | transcripti |
| GI_22538460-S | 379.6   | 372.9  | 378    | NCOR1   | <a href="#">NM_006311.2</a> | N-CoR;TRAC1;hN-                     | transcripti |             | transcripti |
| GI_22538462-S | 10421.9 | 12505  | 11049  | PSMB1   | <a href="#">NM_002793.2</a> | HC5;PSC5;PMSB1;FLJ25321             | peptidase   | 26S         | ubiquitin-  |
| GI_22538463-S | 2001.6  | 2561.9 | 2087.2 | PSMB2   | <a href="#">NM_002794.3</a> | HC7-I                               | peptidase   | 26S         | ubiquitin-  |
| GI_22538464-S | 3576.1  | 5008.2 | 4939.1 | PSMB3   | <a href="#">NM_002795.2</a> | HC10-II;MGC4147                     | peptidase   | 26S         | ubiquitin-  |
| GI_22538466-S | 5231.7  | 6055.1 | 5066.7 | PSMB4   | <a href="#">NM_002796.2</a> | HN3;HsN3;PROS26                     | peptidase   | 26S         | ubiquitin-  |
| GI_22538468-S | 3335.9  | 4477.6 | 4363.7 | PSMB5   | <a href="#">NM_002797.2</a> | X;MB1;LMPX                          | peptidase   | 26S         | ubiquitin-  |
| GI_22538469-S | 128.2   | 126.3  | 143.5  | EOMES   | <a href="#">NM_005442.2</a> | TBR2                                | DNA         | nucleus     | embryoge    |
| GI_22538474-S | 27856.2 | 31852  | 28930  | UBB     | <a href="#">NM_018955.2</a> | MGC8385                             | ubiquitin   |             | protein     |
| GI_22538475-S | 508.3   | 633.2  | 585.4  | UREB1   | <a href="#">NM_031407.2</a> |                                     |             |             |             |
| GI_22538477-I | 275.9   | 271.1  | 234.1  | PEMT    | <a href="#">NM_148172.1</a> | PNMT;PEAMT;PEMPT;PEMT2;MGC2483      | phosphati   |             | phosphati   |
| GI_22538479-A | 1267.4  | 962.8  | 897.4  | PEMT    | <a href="#">NM_148173.1</a> | PNMT;PEAMT;PEMPT;PEMT2;MGC2483      | phosphati   |             | phosphati   |
| GI_22538481-I | 93      | 89     | 78.5   | PEMT    | <a href="#">NM_007169.2</a> | PNMT;PEAMT;PEMPT;PEMT2;MGC2483      | phosphati   |             | phosphati   |
| GI_22538483-S | 1739.6  | 1303   | 1181.5 | PPIL4   | <a href="#">NM_139126.2</a> | HDCME13P                            | cyclophilin |             | protein     |
| GI_22538484-S | 604.9   | 649.8  | 603.2  | PRPSAP2 | <a href="#">NM_002767.2</a> | PAP41                               | enzyme      |             | nucleobas   |
| GI_22538485-S | 122.2   | 122.5  | 121.4  | PTCH2   | <a href="#">NM_003738.2</a> |                                     | tumor       | integral to | epidermal   |
| GI_22538487-I | 147.6   | 183.7  | 183.8  | SMCR7   | <a href="#">NM_139162.2</a> | MGC23130                            |             |             |             |
| GI_22538489-A | 186.4   | 222.1  | 258.2  | SMCR7   | <a href="#">NM_148886.1</a> | MGC23130                            |             |             |             |
| GI_22538491-A | 279.6   | 312.1  | 349.4  | WBSCR16 | <a href="#">NM_030798.2</a> | MGC44931;DKFZp434D0421              |             |             |             |
| GI_22538491-I | 345.7   | 369.9  | 362.1  | WBSCR16 | <a href="#">NM_030798.2</a> | MGC44931;DKFZp434D0421              |             |             |             |
| GI_22538492-I | 193     | 230.2  | 213.9  | WBSCR16 | <a href="#">NM_148842.1</a> | MGC44931;DKFZp434D0421              |             |             |             |
| GI_22538494-S | 259.8   | 313.6  | 284    | WBSCR17 | <a href="#">NM_022479.1</a> | DKFZp761D2324                       | transferas  |             |             |
| GI_22538496-S | 127.8   | 141.1  | 150.3  | WBSCR18 | <a href="#">NM_032317.2</a> | MGC12943                            | chaperone   |             | protein     |
| GI_22538790-I | 101.9   | 103.5  | 103    | PDCD10  | <a href="#">NM_007217.3</a> | TFAR15;MGC1212;MGC24477             |             |             |             |
| GI_22538791-I | 309.5   | 373.5  | 362.1  | PDCD10  | <a href="#">NM_145859.1</a> | TFAR15;MGC1212;MGC24477             |             |             |             |
| GI_22538793-A | 984     | 1395.4 | 1148.6 | PDCD10  | <a href="#">NM_145860.1</a> | TFAR15;MGC1212;MGC24477             |             |             |             |
| GI_22538795-I | 82.3    | 92.7   | 88.9   | CCL25   | <a href="#">NM_005624.2</a> | TECK;Ckb15;SCYA25                   | chemokin    | soluble     | chemotaxi   |
| GI_22538797-A | 232.4   | 317.3  | 273.3  | CCL25   | <a href="#">NM_148888.1</a> | TECK;Ckb15;SCYA25                   | chemokin    | soluble     | chemotaxi   |
| GI_22538799-S | 90.2    | 93     | 91.4   | CCL13   | <a href="#">NM_005408.2</a> | NCC1;CKb10;MCP-4;NCC-               | chemokin    | membran     | chemotaxi   |
| GI_22538800-S | 133.3   | 163.1  | 146.6  | CCL16   | <a href="#">NM_004590.2</a> | LEC;LMC;NCC4;CKb12;HCC-4;LCC-1;Mtn- | chemokin    | extracellul | chemotaxi   |
| GI_22538801-S | 117     | 117    | 108    | CCL17   | <a href="#">NM_002987.2</a> | TARC;ABCD-2;SCYA17;A-152E5.3        | chemokin    | extracellul | chemotaxi   |
| GI_22538803-S | 120.2   | 117.4  | 123    | CCL22   | <a href="#">NM_002990.3</a> | MDC;ABCD-1;SCYA22;STCP-1;DC/B-      | chemokin    | extracellul | chemotaxi   |
| GI_22538805-I | 86.3    | 90.5   | 94.2   | CCL23   | <a href="#">NM_005064.3</a> | CKb8;MIP3;Ckb-8;MIP-3;MPIF-         | chemokin    | extracellul | negative    |
| GI_22538807-A | 106.5   | 116    | 108.2  | CCL23   | <a href="#">NM_145898.1</a> | CKb8;MIP3;Ckb-8;MIP-3;MPIF-         | chemokin    | extracellul | negative    |
| GI_22538809-I | 180.7   | 222.7  | 194.5  | CCL28   | <a href="#">NM_019846.3</a> | MEC;CCK1;SCYA28                     | chemokin    | extracellul | chemotaxi   |
| GI_22538810-A | 114.8   | 112.7  | 99.8   | CCL28   | <a href="#">NM_148672.1</a> | MEC;CCK1;SCYA28                     | chemokin    | extracellul | chemotaxi   |
| GI_22538812-S | 136.1   | 1460.1 | 234.3  | CCL2    | <a href="#">NM_002982.2</a> | HC11;MCAF;MCP1;MCP-1;SCYA2;GDCF-    | chemokin    | membran     | response    |

|               |        |        |        |           |                             |                                         |             |             |              |
|---------------|--------|--------|--------|-----------|-----------------------------|-----------------------------------------|-------------|-------------|--------------|
| GI_22538813-S | 138.5  | 306.5  | 159.1  | CCL5      | <a href="#">NM_002985.2</a> | SISd;SCYA5;RANTES;TCP228;D17S136E;M     | chemokine   | extracellul | response     |
| GI_22538815-S | 165.2  | 189.8  | 168.6  | CCL8      | <a href="#">NM_005623.2</a> | HC14;MCP2;MCP-2;SCYA8;SCYA10            | chemokine   | extracellul | response     |
| GI_22547111-S | 119.4  | 112.9  | 98.8   | TNFRSF11A | <a href="#">NM_003839.2</a> | EOF;FEO;OFE;ODFR;PDB2;RANK;TRANCE       | receptor    | integral to | positive     |
| GI_22547113-A | 3971.4 | 3616.6 | 3707.3 | MRPL10    | <a href="#">NM_145255.2</a> | RPML8;MRP-L8;MGC17973                   |             |             |              |
| GI_22547115-I | 115.2  | 126.9  | 131.2  | TNFRSF10B | <a href="#">NM_003842.3</a> | DR5;KILLER;TRICK2;TRICKB;ZTNFR9;TRAI    | death       | integral to | induction    |
| GI_22547118-A | 9087.7 | 10572  | 10228  | TNFRSF10B | <a href="#">NM_147187.1</a> | DR5;KILLER;TRICK2;TRICKB;ZTNFR9;TRAI    | death       | integral to | induction    |
| GI_22547120-S | 311.6  | 399.8  | 331.9  | TNFRSF10C | <a href="#">NM_003841.2</a> | LIT;DCR1;TRID;TRAILR3                   | transmem    | integral to | signal       |
| GI_22547122-S | 374.8  | 409    | 182.9  | TNFRSF11B | <a href="#">NM_002546.2</a> | OPG;TR1;OCIF;MGC29565                   | cytokine    | extracellul | skeletal     |
| GI_22547127-A | 1549.1 | 1690.5 | 1657.3 | MRPL27    | <a href="#">NM_016504.2</a> | L27mt;MGC23716                          | structural  | ribosome    | protein      |
| GI_22547128-I | 146.5  | 148.6  | 155.9  | MRPL27    | <a href="#">NM_148570.1</a> | L27mt;MGC23716                          | structural  | ribosome    | protein      |
| GI_22547130-I | 99.7   | 110    | 101.8  | MRPL27    | <a href="#">NM_148571.1</a> | L27mt;MGC23716                          | structural  | ribosome    | protein      |
| GI_22547132-S | 1177.3 | 1311.9 | 1233.1 | MRPL34    | <a href="#">NM_023937.2</a> | L34mt;MGC2633;MGC24974                  | structural  | ribosome    | protein      |
| GI_22547133-S | 5368.3 | 5065.5 | 5096.8 | MRPL37    | <a href="#">NM_016491.2</a> | MRPL2;RPML2;MGC878;MRP-L2               |             |             |              |
| GI_22547137-A | 322.1  | 359.6  | 337.9  | MRPL4     | <a href="#">NM_146387.1</a> | L4mt;CGI-28;MGC2681;MGC16367            |             |             |              |
| GI_22547139-I | 98.2   | 105.3  | 104.7  | MRPL4     | <a href="#">NM_146388.1</a> | L4mt;CGI-28;MGC2681;MGC16367            |             |             |              |
| GI_22547142-I | 439    | 1034.8 | 1220.4 | FBXO32    | <a href="#">NM_058229.2</a> | MAFbx;ATROGIN1;FLJ32424;MGC33610        | odorant     |             | transport    |
| GI_22547143-A | 2189   | 4072.6 | 3660.8 | FBXO32    | <a href="#">NM_148177.1</a> | MAFbx;ATROGIN1;FLJ32424;MGC33610        | odorant     |             | transport    |
| GI_22547143-I | 100.3  | 104.4  | 92.3   | FBXO32    | <a href="#">NM_148177.1</a> | MAFbx;ATROGIN1;FLJ32424;MGC33610        | odorant     |             | transport    |
| GI_22547145-S | 165.9  | 199.8  | 205.5  | FBXL8     | <a href="#">NM_018378.2</a> | FLJ11278;MGC19959                       |             |             |              |
| GI_22547147-A | 975.9  | 958    | 906.9  | FBXO22    | <a href="#">NM_012170.2</a> | FBX22;FLJ13986                          | ubiquitin   |             | ubiquitin-   |
| GI_22547147-I | 126    | 151.7  | 125.3  | FBXO22    | <a href="#">NM_012170.2</a> | FBX22;FLJ13986                          | ubiquitin   |             | ubiquitin-   |
| GI_22547148-I | 276.7  | 327.1  | 321.7  | FBXO22    | <a href="#">NM_147188.1</a> | FBX22;FLJ13986                          | ubiquitin   |             | ubiquitin-   |
| GI_22547150-S | 208.4  | 252.3  | 224.8  | CCL18     | <a href="#">NM_002988.2</a> | CKb7;PARC;AMAC1;DCCK1;MIP-4;AMAC-       | chemokine   | extracellul | response     |
| GI_22547151-S | 274.8  | 342.5  | 310.3  | CCL26     | <a href="#">NM_006072.3</a> | IMAC;TSC-1;MIP-4a;SCYA26;eotaxin-3;MIP- | chemokine   | extracellul | chemotaxi    |
| GI_22547155-S | 1835.9 | 1411.9 | 1671.1 | FLII      | <a href="#">NM_002018.2</a> | FLI;FLIL;Fli1;MGC39265                  | actin       |             | muscle       |
| GI_22547156-S | 149.6  | 163.4  | 146.9  | ABHD8     | <a href="#">NM_024527.2</a> | MGC2512;FLJ11743;MGC14280               | epoxide     |             | response     |
| GI_22547158-S | 2945.7 | 8028.6 | 6420.9 | FLJ20343  | <a href="#">NM_017775.2</a> | MGC19520                                |             |             |              |
| GI_22547160-S | 195.7  | 284.1  | 305.6  | FZD4      | <a href="#">NM_012193.2</a> | EVR1;Fz-4;FzE4;GPCR;FZD4S;MGC34390      | frizzled    | integral to | frizzled     |
| GI_22547170-A | 110    | 113    | 106.1  | OSBPL9    | <a href="#">NM_148907.1</a> | ORP9;FLJ12492;FLJ14629;FLJ14801;FLJ32   |             |             |              |
| GI_22547175-I | 145.2  | 151.9  | 146.7  | OSBPL9    | <a href="#">NM_148909.1</a> | ORP9;FLJ12492;FLJ14629;FLJ14801;FLJ32   |             |             |              |
| GI_22547178-S | 1081   | 991    | 1252.2 | TRPV2     | <a href="#">NM_016113.3</a> | VRL;VRL1;VRL-1;MGC12549                 | ion         | integral to | sensory      |
| GI_22547179-A | 810.6  | 1329.4 | 522.1  | TRPV4     | <a href="#">NM_147204.1</a> | VRL2;TRP12;VRL-2;VROAC;OTRPC4           |             |             |              |
| GI_22547181-S | 98.1   | 95.7   | 95.9   | ZIC1      | <a href="#">NM_003412.2</a> | ZIC;ZNF201                              | DNA         | nucleus     | brain        |
| GI_22547183-I | 102.6  | 132.2  | 113    | TRPV4     | <a href="#">NM_021625.3</a> | VRL2;TRP12;VRL-2;VROAC;OTRPC4           |             |             |              |
| GI_22547185-I | 200.1  | 224.5  | 248.7  | SHMT1     | <a href="#">NM_004169.3</a> | CSHMT;MGC15229;MGC24556                 | glycine     | cytosol     | L-serine     |
| GI_22547188-A | 690.9  | 690.8  | 795.9  | SHMT1     | <a href="#">NM_148918.1</a> | CSHMT;MGC15229;MGC24556                 | glycine     | cytosol     | L-serine     |
| GI_22547190-I | 116.5  | 119    | 119.2  | SNX15     | <a href="#">NM_013306.2</a> | HSAF001435                              | protein     | membran     | intracellula |
| GI_22547192-A | 873.4  | 565.1  | 991    | SNX15     | <a href="#">NM_147777.1</a> | HSAF001435                              | protein     | membran     | intracellula |
| GI_22547194-S | 680.8  | 823.1  | 949.4  | SREBF1    | <a href="#">NM_004176.2</a> | SREBP1                                  | RNA         | nuclear     | lipid        |
| GI_22547196-S | 576.1  | 470.5  | 553.5  | ZIC2      | <a href="#">NM_007129.2</a> | HPE5                                    | DNA         | nucleus     | brain        |
| GI_22547199-S | 96.7   | 100.9  | 94.7   | ZIC3      | <a href="#">NM_003413.2</a> | HTX;HTX1;ZNF203                         | DNA         | nucleus     | determinat   |
| GI_22547200-S | 111.4  | 108.9  | 91.7   | ZIC4      | <a href="#">NM_032153.2</a> |                                         | DNA         | nucleus     |              |
| GI_22547202-S | 339.4  | 405.5  | 354.8  | ZIC5      | <a href="#">NM_033132.2</a> |                                         | DNA         | nucleus     |              |
| GI_22547203-I | 117    | 146.4  | 126.9  | HR        | <a href="#">NM_005144.2</a> | AU;ALUNC;HSA277165                      | transcripti | nucleus     | epidermal    |

|               |        |        |        |          |                             |                                    |             |              |              |
|---------------|--------|--------|--------|----------|-----------------------------|------------------------------------|-------------|--------------|--------------|
| GI_22547206-A | 120.7  | 141.9  | 114.4  | HR       | <a href="#">NM_018411.2</a> | AU;ALUNC;HSA277165                 | transcripti | nucleus      | epidermal    |
| GI_22547209-A | 126.8  | 128.4  | 114.1  | PPIL2    | <a href="#">NM_014337.2</a> | CYC4;CYP60;MGC787;hCyP-60;MGC33174 | cyclophilin | kinesin      | protein      |
| GI_22547209-I | 413.5  | 477.6  | 442.4  | PPIL2    | <a href="#">NM_014337.2</a> | CYC4;CYP60;MGC787;hCyP-60;MGC33174 | cyclophilin | kinesin      | protein      |
| GI_22547211-I | 193.5  | 214.9  | 215.6  | PPIL2    | <a href="#">NM_148175.1</a> | CYC4;CYP60;MGC787;hCyP-60;MGC33174 | cyclophilin | kinesin      | protein      |
| GI_22547217-I | 204.1  | 230.5  | 226.3  | TIRAP    | <a href="#">NM_052887.2</a> | Mal;wyatt                          |             |              |              |
| GI_22547218-A | 137.5  | 149.9  | 151.3  | TIRAP    | <a href="#">NM_148910.1</a> | Mal;wyatt                          |             |              |              |
| GI_22547218-I | 117.3  | 139.1  | 139.8  | TIRAP    | <a href="#">NM_148910.1</a> | Mal;wyatt                          |             |              |              |
| GI_22547220-S | 98.6   | 90.5   | 82.9   | TLL1     | <a href="#">NM_012464.3</a> | TLL                                | metallope   |              | skeletal     |
| GI_22547222-S | 111.9  | 110.5  | 101.9  | TLL2     | <a href="#">NM_012465.2</a> | KIAA0932                           | metallope   |              | proteolysis  |
| GI_22547223-S | 160.7  | 161.9  | 134.2  | JRKL     | <a href="#">NM_003772.2</a> | HHMJG                              | DNA         | nucleus      | central      |
| GI_22547226-S | 136.4  | 140.8  | 123.9  | LLGL1    | <a href="#">NM_004140.2</a> | DLG4;LLGL1;HUGL1                   | structural  | cytoskelet   |              |
| GI_22547228-S | 87.5   | 91.6   | 80.1   | MYO15A   | <a href="#">NM_016239.2</a> | DFNB3;MYO15                        | structural  | actin        | hearing      |
| GI_22547230-S | 397.3  | 395.1  | 224.6  | NT5M     | <a href="#">NM_020201.2</a> | mdN;DNT2;dNT-2                     | nucleotida  | mitochond    | pyrimidine   |
| GI_22547231-S | 110.3  | 118    | 114.7  | TBR1     | <a href="#">NM_006593.2</a> | TES-56                             | transcripti | nucleus      | brain        |
| GI_22547233-S | 476.8  | 467.6  | 455.7  | WDR11    | <a href="#">NM_018117.1</a> | DR11;WDR15;FLJ10506;KIAA1351       |             | integral to  | cell growth  |
| GI_22726178-S | 9952.1 | 9991.9 | 8237.7 | LDHB     | <a href="#">NM_002300.3</a> |                                    | L-lactate   |              | glycolysis   |
| GI_22726202-S | 322    | 387.4  | 345.1  | TAS1R2   | <a href="#">NM_152232.1</a> | TR2;T1R2;GPR71                     | metabotro   | membran      |              |
| GI_22748614-S | 1383.6 | 1969.1 | 1527.4 | MGC17943 | <a href="#">NM_152261.1</a> |                                    |             |              |              |
| GI_22748616-S | 106    | 114.2  | 96.5   | DEFB105  | <a href="#">NM_152250.1</a> | BD-5;DEFB-5                        |             |              | xenobiotic   |
| GI_22748618-A | 586.3  | 769.7  | 336.6  | TPM3     | <a href="#">NM_152263.1</a> | TRK;NEM1                           |             |              |              |
| GI_22748618-I | 234.7  | 291.7  | 255.7  | TPM3     | <a href="#">NM_152263.1</a> | TRK;NEM1                           |             |              |              |
| GI_22748622-S | 722.1  | 741.1  | 670.7  | MGC32020 | <a href="#">NM_152266.1</a> |                                    |             |              |              |
| GI_22748624-S | 94.8   | 100.1  | 92.7   | ZNF439   | <a href="#">NM_152262.1</a> | DKFZp571K0837                      | nucleic     | nucleus      | regulation   |
| GI_22748626-S | 198.5  | 175.1  | 146.1  | FLJ38663 | <a href="#">NM_152269.1</a> |                                    | translation |              | translation  |
| GI_22748634-S | 290.4  | 333.1  | 239    | DC-UbP   | <a href="#">NM_152277.1</a> | MGC30022                           |             |              |              |
| GI_22748638-S | 169    | 166    | 166.9  | FLJ11752 | <a href="#">NM_152281.1</a> | NTKLBP1                            |             |              |              |
| GI_22748640-S | 1253.1 | 1211.1 | 1258.1 | MGC29816 | <a href="#">NM_152272.1</a> |                                    | molecular   |              |              |
| GI_22748650-S | 1571.2 | 1880.2 | 2040.1 | MGC13024 | <a href="#">NM_152288.1</a> |                                    |             |              |              |
| GI_22748652-S | 245.2  | 293.4  | 278.5  | ARRDC1   | <a href="#">NM_152285.1</a> | MGC40555                           |             |              | sensory      |
| GI_22748654-S | 108.3  | 90.9   | 105.9  | MGC35194 | <a href="#">NM_152290.1</a> |                                    |             |              |              |
| GI_22748660-S | 152    | 184.3  | 159    | ZNF561   | <a href="#">NM_152289.1</a> | MGC45408                           |             | nucleus      |              |
| GI_22748664-S | 103.3  | 100.6  | 104    | MUC7     | <a href="#">NM_152291.1</a> | MGC34772                           |             |              |              |
| GI_22748674-S | 101.2  | 106.3  | 95.6   | MGC45806 | <a href="#">NM_152304.1</a> |                                    | GTP         |              | protein      |
| GI_22748678-S | 362.8  | 241.2  | 251.9  | FLJ40452 | <a href="#">NM_152307.1</a> |                                    |             |              |              |
| GI_22748680-S | 209.5  | 267.7  | 215.5  | ZNF554   | <a href="#">NM_152303.1</a> | FLJ34817                           | nucleic     | nucleus      | regulation   |
| GI_22748684-S | 132.5  | 170.6  | 144.6  | MGC32871 | <a href="#">NM_152311.1</a> |                                    |             |              |              |
| GI_22748688-S | 975.7  | 1058.1 | 797.3  | MGC34830 | <a href="#">NM_152314.1</a> |                                    |             |              |              |
| GI_22748690-S | 98.4   | 118.6  | 106.7  | MGC34290 | <a href="#">NM_152315.1</a> |                                    |             |              |              |
| GI_22748692-S | 736.6  | 764.2  | 526    | FLJ38968 | <a href="#">NM_152316.1</a> |                                    |             |              |              |
| GI_22748694-S | 82.9   | 88.1   | 80.7   | DEPDC4   | <a href="#">NM_152317.1</a> | DEP.4;FLJ33505                     |             |              | intracellula |
| GI_22748696-S | 465.3  | 399.5  | 337.2  | MGC40397 | <a href="#">NM_152318.1</a> |                                    |             |              |              |
| GI_22748700-S | 497.7  | 567    | 476.9  | FLJ31295 | <a href="#">NM_152320.1</a> |                                    | nucleic     | intracellula | regulation   |
| GI_22748702-S | 121.4  | 127.1  | 118.5  | FLJ32115 | <a href="#">NM_152321.1</a> |                                    | oxidoredu   | microfibril  |              |
| GI_22748704-S | 2612.9 | 1793.2 | 1873.3 | BTBD11   | <a href="#">NM_152322.1</a> | FLJ33957                           | protein     |              |              |

|               |         |        |        |             |                             |                       |             |            |             |
|---------------|---------|--------|--------|-------------|-----------------------------|-----------------------|-------------|------------|-------------|
| GI_22748706-S | 98.3    | 107    | 101.9  | SPIC        | <a href="#">NM_152323.1</a> | SPI-C;MGC40611        | transcripti | nucleus    | regulation  |
| GI_22748708-S | 111.8   | 123    | 105.6  | MGC35169    | <a href="#">NM_152324.1</a> |                       |             |            |             |
| GI_22748710-S | 136.7   | 164.7  | 151.5  | MGC40178    | <a href="#">NM_152325.1</a> |                       |             |            |             |
| GI_22748712-S | 718.3   | 683    | 866.9  | ANKRD9      | <a href="#">NM_152326.1</a> | MGC21990              |             | extrachro  |             |
| GI_22748714-S | 119.2   | 107    | 110.2  | AK7         | <a href="#">NM_152327.1</a> | FLJ32864              | ATP         |            |             |
| GI_22748722-S | 81.9    | 75     | 76.4   | PTE2B       | <a href="#">NM_152331.1</a> | PTE1B;PTE-1b;FLJ31235 |             |            |             |
| GI_22748726-S | 692.4   | 696.6  | 584.1  | SLC25A29    | <a href="#">NM_152333.1</a> | C14orf69;FLJ38975     | binding     | mitochond  | transport   |
| GI_22748730-S | 313.7   | 385.1  | 329.3  | FLJ38190    | <a href="#">NM_152335.1</a> |                       |             |            |             |
| GI_22748732-S | 100.8   | 113.7  | 97.9   | FLJ32310    | <a href="#">NM_152336.1</a> |                       | carboxype   |            | proteolysis |
| GI_22748734-S | 127.9   | 132    | 135.3  | FLJ32702    | <a href="#">NM_152337.1</a> |                       |             |            |             |
| GI_22748736-S | 132.5   | 148.9  | 137.9  | ZG16        | <a href="#">NM_152338.1</a> | MGC34820              |             |            |             |
| GI_22748742-S | 122.1   | 155.8  | 138.5  | CDYL2       | <a href="#">NM_152342.1</a> | FLJ38866              | chromatin   | chromatin  | chromatin   |
| GI_22748744-S | 112.3   | 130.6  | 125    | FLJ25414    | <a href="#">NM_152343.1</a> |                       |             |            |             |
| GI_22748746-S | 1817.4  | 1903.1 | 1596.7 | FLJ30656    | <a href="#">NM_152344.1</a> |                       |             |            |             |
| GI_22748750-S | 169.8   | 277.9  | 462.2  | MGC34680    | <a href="#">NM_152346.1</a> |                       |             |            |             |
| GI_22748754-S | 209.5   | 332.5  | 289.3  | FLJ33817    | <a href="#">NM_152348.1</a> |                       |             |            |             |
| GI_22748756-S | 148.7   | 178.8  | 141.5  | MGC45562    | <a href="#">NM_152349.1</a> |                       |             | intermedia |             |
| GI_22748758-S | 14059.8 | 11682  | 9910.7 | MGC40157    | <a href="#">NM_152350.1</a> |                       |             |            |             |
| GI_22748762-S | 869.6   | 770.5  | 644.8  | MGC24180    | <a href="#">NM_152352.1</a> |                       |             |            |             |
| GI_22748764-S | 129.5   | 151.3  | 177.1  | MGC33839    | <a href="#">NM_152353.1</a> |                       |             | membran    |             |
| GI_22748768-S | 105.1   | 111.7  | 105.8  | ZNF441      | <a href="#">NM_152355.1</a> | FLJ38637              | DNA         | nucleus    | regulation  |
| GI_22748772-S | 202.3   | 232.3  | 206.6  | ZNF440      | <a href="#">NM_152357.1</a> | FLJ37933              | nucleic     | nucleus    | regulation  |
| GI_22748774-S | 95.2    | 98.5   | 91     | MGC33947    | <a href="#">NM_152358.1</a> |                       |             |            |             |
| GI_22748776-S | 118.6   | 148.5  | 110.1  | CPT1C       | <a href="#">NM_152359.1</a> | CPT1C;FLJ23809        | acyltransf  |            |             |
| GI_22748780-S | 159.7   | 179.3  | 171.7  | MGC17791    | <a href="#">NM_152362.1</a> |                       |             |            |             |
| GI_22748786-S | 152.8   | 157.4  | 166.5  | FLJ34633    | <a href="#">NM_152365.1</a> |                       | DNA         | nucleus    | regulation  |
| GI_22748790-S | 117.1   | 110.4  | 95.8   | FLJ38716    | <a href="#">NM_152367.1</a> |                       |             |            |             |
| GI_22748798-S | 428.7   | 405.4  | 485.8  | MGC26818    | <a href="#">NM_152371.1</a> |                       |             |            |             |
| GI_22748804-S | 659.9   | 730.4  | 749.8  | FLJ38984    | <a href="#">NM_152374.1</a> |                       |             |            |             |
| GI_22748806-S | 230.2   | 282.4  | 243.6  | FLJ38753    | <a href="#">NM_152375.1</a> |                       |             |            |             |
| GI_22748810-S | 119.5   | 133.7  | 124.5  | MGC34837    | <a href="#">NM_152377.1</a> |                       | sugar       |            | phosphoe    |
| GI_22748812-S | 680.6   | 852.7  | 1058.1 | FLJ31052    | <a href="#">NM_152378.1</a> |                       |             |            |             |
| GI_22748814-S | 654     | 685.4  | 589.4  | DKFZp547B1  | <a href="#">NM_152379.1</a> |                       |             |            |             |
| GI_22748818-S | 91      | 88     | 81.8   | FLJ37953    | <a href="#">NM_152382.1</a> |                       |             |            |             |
| GI_22748822-S | 154     | 252.4  | 278.5  | DKFZp762119 | <a href="#">NM_152384.1</a> |                       |             |            |             |
| GI_22748824-S | 219.7   | 223.7  | 213.3  | FLJ31438    | <a href="#">NM_152385.1</a> |                       |             |            |             |
| GI_22748828-S | 178.5   | 222.8  | 214.3  | FLJ31322    | <a href="#">NM_152387.1</a> | FLJ37818              | voltage-    | membran    | potassium   |
| GI_22748830-S | 500.5   | 492.5  | 540.5  | ALS2CR4     | <a href="#">NM_152388.1</a> | FLJ33282              |             |            |             |
| GI_22748832-S | 114.1   | 125.1  | 119.3  | MGC35338    | <a href="#">NM_152389.1</a> |                       |             |            |             |
| GI_22748834-S | 124.5   | 146.6  | 112.5  | MGC33926    | <a href="#">NM_152390.1</a> |                       | structural  | tight      |             |
| GI_22748838-S | 501.6   | 528.8  | 456.1  | AHSA2       | <a href="#">NM_152392.1</a> | Hch1;DKFZp564C236     | transporte  | membran    | transport   |
| GI_22748844-S | 421     | 399.7  | 403.8  | MGC24132    | <a href="#">NM_152396.1</a> |                       | S-          |            |             |
| GI_22748846-S | 102     | 96     | 96.3   | MGC39725    | <a href="#">NM_152397.1</a> |                       |             |            |             |
| GI_22748848-S | 186.3   | 711.5  | 667.2  | MGC45416    | <a href="#">NM_152398.1</a> |                       |             |            |             |

|               |        |        |        |             |                             |                   |           |                         |
|---------------|--------|--------|--------|-------------|-----------------------------|-------------------|-----------|-------------------------|
| GI_22748850-S | 142.7  | 148.4  | 152.9  | FLJ30834    | <a href="#">NM_152399.1</a> |                   |           |                         |
| GI_22748852-S | 523.4  | 375.8  | 339.1  | FLJ39370    | <a href="#">NM_152400.1</a> |                   |           |                         |
| GI_22748854-S | 94     | 82.7   | 95.8   | PDCL2       | <a href="#">NM_152401.1</a> | GCPHLP            |           | phototrans              |
| GI_22748860-S | 216.5  | 211.9  | 209.2  | JMY         | <a href="#">NM_152405.1</a> | FLJ37870          | tubulin-  | chaperoni               |
| GI_22748864-S | 666.8  | 449.9  | 517    | FLJ35779    | <a href="#">NM_152408.1</a> |                   |           |                         |
| GI_22748868-S | 212.1  | 252.2  | 213.9  | PACRG       | <a href="#">NM_152410.1</a> | FLJ32724;PARK2CRG |           |                         |
| GI_22748870-S | 276    | 316.1  | 281.5  | DKFZp762113 | <a href="#">NM_152411.1</a> |                   | nucleic   | intracellula regulation |
| GI_22748872-S | 118.9  | 135.7  | 115    | ZNF572      | <a href="#">NM_152412.1</a> | FLJ38002          |           | nucleus                 |
| GI_22748874-S | 126.2  | 132.6  | 118    | MGC33309    | <a href="#">NM_152413.1</a> |                   | transamin | amino                   |
| GI_22748878-S | 81.6   | 84.7   | 88.6   | FLJ32642    | <a href="#">NM_152415.1</a> | HCRP1             |           |                         |
| GI_22748880-S | 320.5  | 308.8  | 333.9  | MGC40214    | <a href="#">NM_152416.1</a> |                   |           |                         |
| GI_22748882-S | 579.4  | 520.3  | 479.8  | FLJ32370    | <a href="#">NM_152417.1</a> |                   |           |                         |
| GI_22748888-S | 111.4  | 130    | 127.9  | C9orf41     | <a href="#">NM_152420.1</a> | FLJ25795          |           |                         |
| GI_22748896-S | 187.9  | 337.7  | 336.9  | FLJ39827    | <a href="#">NM_152424.1</a> |                   |           |                         |
| GI_22748898-S | 144.5  | 138.9  | 120.5  | FLJ40249    | <a href="#">NM_152425.1</a> |                   |           |                         |
| GI_22748900-S | 111.5  | 114.2  | 124    | MGC35136    | <a href="#">NM_152427.1</a> |                   | actin     | intracellula            |
| GI_22748904-S | 94.2   | 114.1  | 89.6   | HIWI2       | <a href="#">NM_152431.1</a> | FLJ36156          |           |                         |
| GI_22748910-S | 91.4   | 76.8   | 92.3   | MGC24137    | <a href="#">NM_152430.1</a> |                   | olfactory | integral to G-protein   |
| GI_22748912-S | 101.4  | 136.9  | 142.2  | MGC35366    | <a href="#">NM_152435.1</a> |                   | hydrolase | cytoplasm histidine     |
| GI_22748916-S | 1060.2 | 1201.7 | 1124.5 | DKFZp761B1  | <a href="#">NM_152437.1</a> |                   |           | nucleus                 |
| GI_22748918-S | 702.5  | 624.4  | 599.2  | CWF19L2     | <a href="#">NM_152434.1</a> | FLJ32343          |           |                         |
| GI_22748920-S | 213.3  | 216.3  | 215    | FLJ32549    | <a href="#">NM_152440.1</a> |                   |           |                         |
| GI_22748922-S | 159.7  | 177    | 159.6  | MGC39497    | <a href="#">NM_152436.1</a> |                   |           | extracellul             |
| GI_22748926-S | 134.5  | 138    | 139.5  | VMD2L3      | <a href="#">NM_152439.1</a> | MGC40411          |           |                         |
| GI_22748928-S | 100.8  | 103.6  | 96     | ZADH1       | <a href="#">NM_152444.1</a> | FLJ39091          | alcohol   |                         |
| GI_22748930-S | 242.8  | 249    | 191    | FBXL14      | <a href="#">NM_152441.1</a> | MGC40195          |           |                         |
| GI_22748932-S | 167.5  | 121    | 123.3  | C14orf145   | <a href="#">NM_152446.1</a> |                   |           |                         |
| GI_22748934-S | 114.1  | 129.6  | 105    | RDH12       | <a href="#">NM_152443.1</a> | FLJ30273          | oxidoredu | metabolis               |
| GI_22748936-S | 1218.8 | 1007.9 | 1061.2 | XPO5        | <a href="#">NM_020750.1</a> | KIAA1291          |           |                         |
| GI_22748940-S | 93.2   | 88.7   | 88.7   | MGC33951    | <a href="#">NM_152448.1</a> |                   |           |                         |
| GI_22748942-S | 121.1  | 143.4  | 123.6  | C14orf44    | <a href="#">NM_152445.1</a> | FLJ31697;c14_5547 |           | kinesin                 |
| GI_22748944-S | 170.6  | 175.2  | 165    | MGC26690    | <a href="#">NM_152450.1</a> |                   |           |                         |
| GI_22748948-S | 732    | 974.5  | 1246.5 | MGC18216    | <a href="#">NM_152452.1</a> |                   |           |                         |
| GI_22748952-S | 194.9  | 224.6  | 226.7  | FLJ31461    | <a href="#">NM_152454.1</a> |                   |           |                         |
| GI_22748954-S | 109.8  | 139.9  | 140.9  | FLJ30973    | <a href="#">NM_152451.1</a> |                   |           |                         |
| GI_22748956-S | 104.3  | 113.6  | 107.7  | MGC34647    | <a href="#">NM_152456.1</a> |                   |           |                         |
| GI_22748964-S | 247.6  | 340.5  | 425.8  | FLJ30999    | <a href="#">NM_152461.1</a> |                   |           |                         |
| GI_22748966-S | 134.7  | 131.4  | 130.4  | ZNF597      | <a href="#">NM_152457.1</a> | FLJ33071          | nucleic   | intracellula regulation |
| GI_22748968-S | 170.2  | 178.3  | 164.4  | EME1        | <a href="#">NM_152463.1</a> | MMS4L;FLJ31364    | ATP       | hydrogen                |
| GI_22748970-S | 240.1  | 259.7  | 234.1  | FLJ31882    | <a href="#">NM_152460.1</a> |                   |           |                         |
| GI_22748972-S | 109.4  | 115.2  | 117.6  | MGC39650    | <a href="#">NM_152465.1</a> |                   | phospholi | lipid                   |
| GI_22748974-S | 104.2  | 114.4  | 99.3   | TMEM21A     | <a href="#">NM_152462.1</a> | AMAC1;FLJ40154    |           | membran                 |
| GI_22748976-S | 125.3  | 118.9  | 122.3  | KLHL10      | <a href="#">NM_152467.1</a> | FLJ32662          | protein   | nucleus                 |
| GI_22748978-S | 448.9  | 506.1  | 533.6  | MGC45714    | <a href="#">NM_152464.1</a> |                   |           |                         |

|               |        |        |        |           |                             |                       |              |                         |
|---------------|--------|--------|--------|-----------|-----------------------------|-----------------------|--------------|-------------------------|
| GI_22748980-S | 116.6  | 111.7  | 98.1   | FLJ31338  | <a href="#">NM_152469.1</a> |                       |              |                         |
| GI_22748982-S | 239.8  | 236.1  | 203.9  | FLJ25168  | <a href="#">NM_152466.1</a> |                       |              |                         |
| GI_22748984-S | 309.8  | 310.9  | 334    | MGC17515  | <a href="#">NM_152471.1</a> |                       |              |                         |
| GI_22748988-S | 143.2  | 158.6  | 139.3  | FLJ32214  | <a href="#">NM_152473.1</a> | structural            | viral        |                         |
| GI_22748990-S | 316.7  | 360.8  | 354.1  | FLJ34218  | <a href="#">NM_152470.1</a> |                       |              |                         |
| GI_22748992-S | 1263.2 | 1512.9 | 1246.4 | MGC34079  | <a href="#">NM_152475.1</a> | nucleic               | intracellula | regulation              |
| GI_22748994-S | 186.1  | 215.6  | 176    | ZNF578    | <a href="#">NM_152472.1</a> | FLJ31384              | electron     | nucleus electron        |
| GI_22748996-S | 145.2  | 163.6  | 164.2  | ZNF565    | <a href="#">NM_152477.1</a> | FLJ36991              | nucleic      | nucleus regulation      |
| GI_22749000-S | 111.6  | 100.1  | 111.5  | FLJ30373  | <a href="#">NM_152479.1</a> |                       |              |                         |
| GI_22749002-S | 101.9  | 101.7  | 114.8  | ZNF560    | <a href="#">NM_152476.1</a> | FLJ31986              | nucleic      | intracellula regulation |
| GI_22749004-S | 110.4  | 104    | 100.9  | FLJ25660  | <a href="#">NM_152481.1</a> |                       |              |                         |
| GI_22749006-S | 184.2  | 226.7  | 201    | ZNF583    | <a href="#">NM_152478.1</a> | FLJ31030              | nucleic      | intracellula regulation |
| GI_22749008-S | 109.4  | 116.8  | 105.4  | FLJ25328  | <a href="#">NM_152483.1</a> |                       |              |                         |
| GI_22749010-S | 445.6  | 521.7  | 502.3  | C19orf23  | <a href="#">NM_152480.1</a> | MGC39338              |              |                         |
| GI_22749012-S | 233.8  | 260    | 217.2  | MGC45873  | <a href="#">NM_152486.1</a> |                       |              |                         |
| GI_22749014-S | 170.6  | 192.2  | 199.3  | C19orf25  | <a href="#">NM_152482.1</a> | FLJ36666              |              |                         |
| GI_22749016-S | 129.6  | 133.5  | 122    | FLJ32833  | <a href="#">NM_152488.1</a> |                       |              |                         |
| GI_22749020-S | 141.2  | 147.5  | 124.6  | MGC39558  | <a href="#">NM_152490.1</a> | galactosylt           | membran      | protein                 |
| GI_22749022-S | 117.8  | 129.6  | 135.3  | FLJ31842  | <a href="#">NM_152487.1</a> |                       |              |                         |
| GI_22749024-S | 80     | 78.5   | 66.4   | FLJ32825  | <a href="#">NM_152492.1</a> |                       |              |                         |
| GI_22749026-S | 126.6  | 131    | 126.2  | MGC35130  | <a href="#">NM_152489.1</a> | ubiquitin             |              | ubiquitin               |
| GI_22749028-S | 178.6  | 220.1  | 200.9  | FLJ32785  | <a href="#">NM_152494.1</a> |                       |              |                         |
| GI_22749032-S | 595.8  | 329.8  | 715.5  | FLJ31434  | <a href="#">NM_152496.1</a> |                       |              |                         |
| GI_22749036-S | 100.4  | 116.4  | 104.1  | FLJ32000  | <a href="#">NM_152498.1</a> |                       |              |                         |
| GI_22749038-S | 5799.3 | 3915.2 | 3453.8 | FLJ38993  | <a href="#">NM_152495.1</a> |                       | integral to  | intracellula            |
| GI_22749040-S | 218.5  | 264.9  | 236.8  | FLJ33084  | <a href="#">NM_152500.1</a> |                       |              |                         |
| GI_22749042-S | 114.9  | 112.3  | 119.2  | FLJ32206  | <a href="#">NM_152497.1</a> |                       |              |                         |
| GI_22749044-S | 78.7   | 78.6   | 74.5   | FLJ32154  | <a href="#">NM_152502.1</a> |                       |              |                         |
| GI_22749046-S | 297.8  | 394.5  | 393.5  | MGC45441  | <a href="#">NM_152499.1</a> |                       |              |                         |
| GI_22749050-S | 146.6  | 167.1  | 162.2  | IFIX      | <a href="#">NM_152501.1</a> | MGC23885              |              |                         |
| GI_22749052-S | 117.9  | 133.3  | 119.6  | C21orf128 | <a href="#">NM_152507.1</a> | FLJ33471              |              |                         |
| GI_22749056-S | 135.7  | 147.3  | 146.2  | FLJ31568  | <a href="#">NM_152509.1</a> |                       |              |                         |
| GI_22749058-S | 101.4  | 103    | 96.3   | C21orf129 | <a href="#">NM_152506.1</a> | PRED76;FLJ32835       |              |                         |
| GI_22749062-S | 89.9   | 99.4   | 89.9   | FLJ32575  | <a href="#">NM_152508.1</a> |                       |              |                         |
| GI_22749066-S | 104    | 91.9   | 98.2   | MGC26710  | <a href="#">NM_152510.1</a> |                       |              |                         |
| GI_22749072-S | 94.7   | 119.5  | 132.1  | FLJ30990  | <a href="#">NM_152517.1</a> |                       |              |                         |
| GI_22749078-S | 572.7  | 701.9  | 716.6  | COMMD1    | <a href="#">NM_152516.1</a> | MURR1;C2orf5;MGC27155 |              |                         |
| GI_22749082-S | 92.5   | 100.4  | 90     | FLJ38359  | <a href="#">NM_152518.1</a> |                       |              |                         |
| GI_22749084-S | 189.5  | 224.8  | 275.9  | FLJ40432  | <a href="#">NM_152523.1</a> | cyclin-               |              | cytokinesi              |
| GI_22749094-S | 92.6   | 86.6   | 90.4   | TRIPIN    | <a href="#">NM_152524.1</a> | FLJ25211              |              |                         |
| GI_22749102-S | 557.7  | 413.1  | 430    | FLJ36175  | <a href="#">NM_152528.1</a> |                       |              |                         |
| GI_22749104-S | 125.5  | 135.1  | 137.5  | MGC34728  | <a href="#">NM_152533.1</a> |                       |              |                         |
| GI_22749110-S | 148.7  | 132.1  | 123.1  | FLJ31715  | <a href="#">NM_152532.1</a> |                       |              |                         |
| GI_22749114-S | 105.5  | 119.5  | 95.2   | FLJ32685  | <a href="#">NM_152534.1</a> | ATP                   |              | protein                 |

|               |        |        |        |            |                             |                            |             |              |             |
|---------------|--------|--------|--------|------------|-----------------------------|----------------------------|-------------|--------------|-------------|
| GI_22749116-S | 132.2  | 149.7  | 128.9  | FLJ32859   | <a href="#">NM_152539.1</a> |                            |             |              |             |
| GI_22749120-S | 103.6  | 123.1  | 115    | FLJ30194   | <a href="#">NM_152541.1</a> |                            |             |              |             |
| GI_22749122-S | 122.9  | 136.6  | 133.3  | IGSF11     | <a href="#">NM_152538.1</a> | lgsf13;BT-IgSF;MGC35227    |             |              |             |
| GI_22749124-S | 79.4   | 101.7  | 80.2   | FLJ25371   | <a href="#">NM_152543.1</a> |                            |             |              |             |
| GI_22749128-S | 95.2   | 98     | 99.4   | RASGEF1B   | <a href="#">NM_152545.1</a> | GPIG4;FLJ31695             | guanyl-     |              | small       |
| GI_22749132-S | 93.5   | 82.2   | 86.9   | FLJ32535   | <a href="#">NM_152547.1</a> |                            |             |              |             |
| GI_22749134-S | 174.5  | 196    | 148    | FLJ35725   | <a href="#">NM_152544.1</a> |                            |             |              |             |
| GI_22749136-S | 137.2  | 122.9  | 128    | MGC39633   | <a href="#">NM_152549.1</a> |                            |             |              |             |
| GI_22749138-S | 345.1  | 345.9  | 329.5  | FLJ25286   | <a href="#">NM_152546.1</a> |                            |             |              |             |
| GI_22749142-S | 124.3  | 129.6  | 117    | FLJ25333   | <a href="#">NM_152548.1</a> |                            |             |              |             |
| GI_22749146-S | 434.1  | 335.9  | 427.5  | SH3RF2     | <a href="#">NM_152550.1</a> | RNF158;FLJ23654            |             |              |             |
| GI_22749150-S | 88.5   | 105.3  | 85.5   | SAMD3      | <a href="#">NM_152552.1</a> | FLJ34032;MGC35163;bA73O6.2 |             |              |             |
| GI_22749154-S | 98.3   | 100    | 92.9   | C6orf195   | <a href="#">NM_152554.1</a> | FLJ31934;bA145H9.2         |             |              |             |
| GI_22749158-S | 193.4  | 273.6  | 262.1  | FLJ31818   | <a href="#">NM_152556.1</a> |                            |             |              |             |
| GI_22749164-S | 230.6  | 285.4  | 279.8  | ATP6V0D2   | <a href="#">NM_152565.1</a> | VMA6;ATP6D2;FLJ38708       | hydrogen-   |              | hydrogen    |
| GI_22749166-S | 731.5  | 952.8  | 1554.8 | FLJ32205   | <a href="#">NM_152561.1</a> |                            |             |              |             |
| GI_22749168-S | 166.4  | 226.9  | 197.9  | FLJ25402   | <a href="#">NM_152567.1</a> |                            |             |              |             |
| GI_22749172-S | 120.1  | 119.9  | 110.7  | C9orf66    | <a href="#">NM_152569.1</a> | FLJ31158                   | DNA         | nucleus      | regulation  |
| GI_22749176-S | 306.1  | 385.4  | 352.6  | FLJ36779   | <a href="#">NM_152571.1</a> |                            |             |              |             |
| GI_22749178-S | 104.3  | 108.9  | 100.4  | FLJ25169   | <a href="#">NM_152568.1</a> |                            | transcripti | nucleus      | regulation  |
| GI_22749180-S | 139    | 159.3  | 135.3  | FLJ31614   | <a href="#">NM_152573.1</a> |                            | calcium     |              |             |
| GI_22749182-S | 122.1  | 122.1  | 112.8  | FLJ31810   | <a href="#">NM_152570.1</a> |                            |             |              |             |
| GI_22749184-S | 91.9   | 111.6  | 100.2  | FLJ31713   | <a href="#">NM_152575.1</a> |                            |             |              |             |
| GI_22749188-S | 109.2  | 118.2  | 102.2  | FLJ25735   | <a href="#">NM_152577.1</a> |                            |             |              |             |
| GI_22749190-S | 197.8  | 198.7  | 178.2  | C9orf52    | <a href="#">NM_152574.1</a> | FLJ33868                   | peptidase   | membran      | proteolysis |
| GI_22749192-S | 720.4  | 747.7  | 450.8  | FLJ38564   | <a href="#">NM_152579.1</a> |                            |             |              |             |
| GI_22749194-S | 133.8  | 160.3  | 131.8  | MGC24103   | <a href="#">NM_152576.1</a> |                            |             |              |             |
| GI_22749196-S | 267.9  | 291.7  | 265.1  | MOSPD2     | <a href="#">NM_152581.1</a> | MGC26706                   | structural  |              | cell        |
| GI_22749198-S | 100.7  | 105.6  | 98.3   | FMR1NB     | <a href="#">NM_152578.1</a> | FLJ25736;NY-SAR-35         |             |              |             |
| GI_22749200-S | 94.6   | 113    | 102.2  | FLJ32742   | <a href="#">NM_152580.1</a> |                            |             |              |             |
| GI_22749204-S | 100.8  | 105.8  | 107.2  | MGC40053   | <a href="#">NM_152583.1</a> |                            |             |              |             |
| GI_22749206-S | 844.8  | 749.8  | 632.7  | USP54      | <a href="#">NM_152586.1</a> | C10orf29;FLJ37318          |             |              |             |
| GI_22749210-S | 123.4  | 124.1  | 137    | DKFZp762A2 | <a href="#">NM_152588.1</a> |                            |             |              |             |
| GI_22749212-S | 95.9   | 101.7  | 105.4  | FLJ35821   | <a href="#">NM_152589.1</a> |                            |             |              |             |
| GI_22749214-S | 232.8  | 305.1  | 284.4  | FLJ36004   | <a href="#">NM_152590.1</a> |                            |             |              |             |
| GI_22749216-S | 102.4  | 131.5  | 99.5   | FLJ35843   | <a href="#">NM_152591.1</a> |                            |             |              |             |
| GI_22749220-S | 2132.4 | 2168.2 | 1982.7 | SPRED1     | <a href="#">NM_152594.1</a> | FLJ33903                   |             |              |             |
| GI_22749228-S | 115.9  | 134.4  | 112.4  | FLJ35757   | <a href="#">NM_152598.1</a> |                            |             |              |             |
| GI_22749230-S | 114.4  | 112.6  | 104.4  | FLJ35773   | <a href="#">NM_152599.1</a> |                            |             |              |             |
| GI_22749232-S | 1965   | 1891.4 | 1472.9 | ZNF579     | <a href="#">NM_152600.1</a> | FLJ35453                   | DNA         | nucleus      | regulation  |
| GI_22749234-S | 110.1  | 122.8  | 112.3  | FLJ38281   | <a href="#">NM_152601.1</a> |                            | nucleic     | intracellula | regulation  |
| GI_22749236-S | 99.5   | 100.1  | 75.5   | ZNF433     | <a href="#">NM_152602.1</a> | FLJ40981                   | nucleic     | nucleus      | regulation  |
| GI_22749242-S | 111    | 116.5  | 128.6  | FLJ40201   | <a href="#">NM_152607.1</a> |                            |             |              |             |
| GI_22749246-S | 672.4  | 583.1  | 491.1  | FLJ32001   | <a href="#">NM_152609.1</a> |                            |             |              |             |



|               |        |        |        |            |                             |                |             |         |            |
|---------------|--------|--------|--------|------------|-----------------------------|----------------|-------------|---------|------------|
| GI_22749248-S | 320.7  | 382.2  | 353.2  | FLJ35728   | <a href="#">NM_152610.1</a> |                |             |         |            |
| GI_22749254-S | 116.2  | 129    | 105.7  | MGC26816   | <a href="#">NM_152613.1</a> |                |             |         |            |
| GI_22749258-S | 82.3   | 92.2   | 81.8   | FLJ40597   | <a href="#">NM_152615.1</a> |                |             |         |            |
| GI_22749266-S | 314.4  | 237.9  | 217.6  | MGC45428   | <a href="#">NM_152619.1</a> |                |             |         |            |
| GI_22749274-S | 151.1  | 176.5  | 161.3  | FLJ37927   | <a href="#">NM_152623.1</a> | G6VTS76519     |             |         |            |
| GI_22749278-S | 116.6  | 113.2  | 119.1  | ZNF366     | <a href="#">NM_152625.1</a> | FLJ39796       | DNA         | nucleus | regulation |
| GI_22749288-S | 84.3   | 84.7   | 87.9   | FLJ35782   | <a href="#">NM_152631.1</a> |                |             |         |            |
| GI_22749290-S | 115.6  | 104.1  | 118    | MGC34831   | <a href="#">NM_152632.1</a> |                |             |         |            |
| GI_22749292-S | 112.7  | 103.4  | 114.6  | FLJ34064   | <a href="#">NM_152633.1</a> |                |             |         |            |
| GI_22749296-S | 138.8  | 153.4  | 143.1  | FLJ39116   | <a href="#">NM_152635.1</a> | LZP            | calcium     |         |            |
| GI_22749298-S | 360.2  | 333.6  | 252.3  | FLJ33979   | <a href="#">NM_152636.1</a> |                | methyltran  |         |            |
| GI_22749300-S | 109.2  | 122.3  | 110.7  | MGC17301   | <a href="#">NM_152637.1</a> |                | S-          |         |            |
| GI_22749304-S | 183.1  | 199.9  | 195.4  | MGC30156   | <a href="#">NM_152639.1</a> |                |             |         |            |
| GI_22749312-S | 369.9  | 306.8  | 215.6  | MGC45962   | <a href="#">NM_152644.1</a> |                |             |         |            |
| GI_22749318-S | 150.3  | 178.5  | 151.9  | FLJ32800   | <a href="#">NM_152647.1</a> |                |             |         |            |
| GI_22749324-S | 119.6  | 113    | 109.6  | ZNF553     | <a href="#">NM_152652.1</a> | FLJ31751       | DNA         | nucleus | regulation |
| GI_22749326-S | 1958   | 1413.8 | 1235.5 | UBE2E2     | <a href="#">NM_152653.1</a> | UBCH8;FLJ25157 | ubiquitin   |         | ubiquitin  |
| GI_22749328-S | 222.9  | 278.6  | 226.3  | FLJ38607   | <a href="#">NM_152654.1</a> |                |             |         |            |
| GI_22749336-S | 236.7  | 320.3  | 364.1  | THAP8      | <a href="#">NM_152658.1</a> | FLJ32891       | DNA         |         |            |
| GI_22749340-S | 431.5  | 494.3  | 490.7  | MGC34648   | <a href="#">NM_152660.1</a> |                |             |         |            |
| GI_22749342-S | 533.7  | 693.3  | 630.5  | DKFZp761G0 | <a href="#">NM_152661.1</a> |                |             |         |            |
| GI_22749344-S | 115    | 111.4  | 109.5  | FLJ23867   | <a href="#">NM_152662.1</a> |                |             |         |            |
| GI_22749348-S | 88.3   | 97.6   | 102.8  | FLJ31401   | <a href="#">NM_152664.1</a> |                |             |         |            |
| GI_22749350-S | 87.4   | 104.1  | 86.2   | FLJ40873   | <a href="#">NM_152665.1</a> |                |             |         |            |
| GI_22749352-S | 100.6  | 90.4   | 90     | FLJ40773   | <a href="#">NM_152666.1</a> |                | catalytic   |         | metabolis  |
| GI_22749356-S | 159.2  | 187.7  | 172.4  | FLJ25369   | <a href="#">NM_152670.1</a> |                | electron    |         | electron   |
| GI_22749358-S | 238.3  | 294.5  | 267.9  | MGC40423   | <a href="#">NM_152671.1</a> |                |             |         |            |
| GI_22749362-S | 109.4  | 142.5  | 114.4  | FBXO15     | <a href="#">NM_152676.1</a> | FBX15;MGC39671 |             |         |            |
| GI_22749364-S | 139.2  | 149.5  | 123    | ZNF494     | <a href="#">NM_152677.1</a> | FLJ35105       | transcripti | nucleus | regulation |
| GI_22749366-S | 692.6  | 542.9  | 609.9  | FLJ32028   | <a href="#">NM_152680.1</a> |                |             |         |            |
| GI_22749370-S | 1130.1 | 1130.4 | 786.7  | MGC10198   | <a href="#">NM_152682.1</a> |                |             |         |            |
| GI_22749372-S | 285.5  | 241.2  | 233.7  | FLJ33167   | <a href="#">NM_152683.1</a> |                |             |         |            |
| GI_22749374-S | 180.3  | 237    | 184    | FLJ39653   | <a href="#">NM_152684.1</a> |                |             |         |            |
| GI_22749376-S | 216.3  | 211    | 198.9  | MGC29463   | <a href="#">NM_152686.1</a> |                | N-          |         | DNA        |
| GI_22749378-S | 112.3  | 116.2  | 99     | FLJ33641   | <a href="#">NM_152687.1</a> |                |             |         |            |
| GI_22749380-S | 99.5   | 88.6   | 83.1   | KHDRBS2    | <a href="#">NM_152688.1</a> | SLM1;MGC26664  | nucleic     | nucleus | regulation |
| GI_22749386-S | 260.4  | 246.8  | 129.6  | ZCCHC5     | <a href="#">NM_152694.1</a> | FLJ38865       | nucleic     |         |            |
| GI_22749392-S | 98.9   | 118.2  | 97     | FLJ38377   | <a href="#">NM_152698.1</a> |                |             |         |            |
| GI_22749400-S | 119.2  | 115.7  | 119.3  | C9orf94    | <a href="#">NM_152702.1</a> | FLJ35283       |             |         |            |
| GI_22749406-S | 676.6  | 1035.7 | 825.8  | MGC9850    | <a href="#">NM_152705.1</a> |                | DNA         | nucleus | regulation |
| GI_22749412-S | 195.6  | 242.2  | 222.7  | C10orf27   | <a href="#">NM_152710.1</a> | FLJ32820       |             |         |            |
| GI_22749416-S | 287.2  | 344.4  | 295.7  | MGC10233   | <a href="#">NM_152715.1</a> |                |             |         |            |
| GI_22749418-S | 165.9  | 179.7  | 174.9  | MGC43033   | <a href="#">NM_152711.1</a> |                |             |         |            |
| GI_22749420-S | 103.8  | 104.8  | 105.4  | MGC35295   | <a href="#">NM_152717.1</a> |                |             |         |            |

|               |        |        |        |             |                             |                                   |             |                       |
|---------------|--------|--------|--------|-------------|-----------------------------|-----------------------------------|-------------|-----------------------|
| GI_22749422-S | 103    | 109.3  | 92.6   | FLJ30719    | <a href="#">NM_152714.1</a> |                                   |             |                       |
| GI_22749424-S | 177.7  | 222    | 207.9  | NURIT       | <a href="#">NM_152719.1</a> | FLJ35810                          |             |                       |
| GI_22749426-S | 2234.7 | 1921.1 | 1745.8 | FLJ36874    | <a href="#">NM_152716.1</a> |                                   |             |                       |
| GI_22749428-S | 124.2  | 168.7  | 129.7  | FLJ38159    | <a href="#">NM_152723.1</a> |                                   |             |                       |
| GI_22749430-S | 262    | 316.7  | 244.1  | FLJ32009    | <a href="#">NM_152718.1</a> | URG11                             | sugar       |                       |
| GI_22749432-S | 147.2  | 184.6  | 158.6  | SLC39A12    | <a href="#">NM_152725.1</a> | FLJ30499                          | heavy       | membran heavy         |
| GI_22749442-S | 234.8  | 305    | 297    | FLJ34588    | <a href="#">NM_152726.1</a> |                                   | calcium     |                       |
| GI_22749444-S | 100.7  | 99.4   | 107.7  | MGC39571    | <a href="#">NM_152728.1</a> |                                   |             |                       |
| GI_22749448-S | 161.7  | 159.1  | 122.4  | C6orf65     | <a href="#">NM_152731.1</a> | FLJ30162;bA203B9.1                |             |                       |
| GI_22749452-S | 397.5  | 479    | 437.9  | C6orf89     | <a href="#">NM_152734.1</a> | FLJ25357                          |             |                       |
| GI_22749454-S | 854.5  | 558.8  | 625.7  | MGC33993    | <a href="#">NM_152737.1</a> |                                   |             |                       |
| GI_22749456-S | 198.6  | 241.1  | 232.2  | MGC40222    | <a href="#">NM_152738.1</a> |                                   |             |                       |
| GI_22749458-S | 153.4  | 185.4  | 140.5  | GPC2        | <a href="#">NM_152742.1</a> | DKFZp547M109                      | extracellul |                       |
| GI_22749462-S | 116    | 126.7  | 131.1  | DKFZp434L1  | <a href="#">NM_152746.1</a> |                                   |             |                       |
| GI_22749464-S | 131    | 130.5  | 133.2  | DKFZp586l14 | <a href="#">NM_152747.1</a> |                                   |             |                       |
| GI_22749470-S | 95.2   | 92.9   | 90     | C10orf30    | <a href="#">NM_152751.1</a> | FLJ40283                          |             |                       |
| GI_22749478-S | 186.5  | 247    | 244.7  | MGC40499    | <a href="#">NM_152755.1</a> |                                   |             |                       |
| GI_22749480-S | 128    | 135.2  | 134.1  | MGC39830    | <a href="#">NM_152756.1</a> |                                   |             |                       |
| GI_22749482-S | 137.8  | 132.9  | 124.9  | FLJ30313    | <a href="#">NM_152757.1</a> |                                   |             |                       |
| GI_22749488-S | 159.7  | 184.2  | 170.9  | FLJ30934    | <a href="#">NM_152760.1</a> |                                   |             | intracellula          |
| GI_22749492-S | 99     | 115.4  | 103    | FLJ32880    | <a href="#">NM_152762.1</a> |                                   |             |                       |
| GI_22749494-S | 132.7  | 153    | 132.9  | MGC35212    | <a href="#">NM_152764.1</a> |                                   |             |                       |
| GI_22749496-S | 109.4  | 103.9  | 99.5   | FLJ25444    | <a href="#">NM_152761.1</a> |                                   |             |                       |
| GI_22749502-S | 100.2  | 130.7  | 121.4  | C19orf26    | <a href="#">NM_152769.1</a> | MGC40084                          |             |                       |
| GI_22749506-S | 84.7   | 81.9   | 73.5   | FLJ25378    | <a href="#">NM_152768.1</a> |                                   |             |                       |
| GI_22749508-S | 80.5   | 91.4   | 102    | MGC35043    | <a href="#">NM_152770.1</a> |                                   |             |                       |
| GI_22749510-S | 310.1  | 371.8  | 331    | MGC39696    | <a href="#">NM_152771.1</a> |                                   |             |                       |
| GI_22749514-S | 167.4  | 119.2  | 98.6   | MGC33607    | <a href="#">NM_152775.1</a> |                                   |             |                       |
| GI_22749516-S | 143.1  | 127.2  | 140    | MGC40368    | <a href="#">NM_152772.1</a> |                                   |             |                       |
| GI_22749518-S | 315.1  | 316.9  | 269.6  | MGC42090    | <a href="#">NM_152774.1</a> |                                   |             |                       |
| GI_22749520-S | 124.1  | 143.5  | 114.4  | MGC40579    | <a href="#">NM_152776.1</a> |                                   |             | carbohydr             |
| GI_22749524-S | 161.3  | 168.9  | 158    | MGC33302    | <a href="#">NM_152778.1</a> |                                   | transporte  | integral to transport |
| GI_22749526-S | 106.7  | 112.3  | 109.9  | MGC26856    | <a href="#">NM_152779.1</a> |                                   | rhodopsin-  | extracellul G-protein |
| GI_22749528-S | 131.6  | 150.9  | 149.6  | FLJ32830    | <a href="#">NM_152781.1</a> |                                   |             |                       |
| GI_22749538-S | 111.7  | 130.3  | 115.2  | C9orf43     | <a href="#">NM_152786.1</a> | MGC17358                          | subtilase   | proteolysis           |
| GI_22749542-S | 625.6  | 532.8  | 494.7  | MGC40405    | <a href="#">NM_152789.1</a> |                                   |             |                       |
| GI_22758131-S | 109.3  | 118.6  | 117.4  | FLJ12616    | <a href="#">NM_152642.1</a> |                                   |             |                       |
| GI_22758145-S | 130.2  | 117.5  | 110.8  | FLJ25084    | <a href="#">NM_152792.1</a> |                                   | aspartic-   | proteolysis           |
| GI_22779859-S | 122.2  | 142.7  | 134.1  | FOXL1       | <a href="#">NM_005250.1</a> | FKH6;FKHL11;FREAC7                | DNA         | nucleus regulation    |
| GI_22779869-S | 210.4  | 208.5  | 268.1  | LOC149420   | <a href="#">NM_152835.1</a> |                                   | protein-    | protein               |
| GI_22779872-S | 691    | 1078.3 | 1239.7 | MTVR1       | <a href="#">NM_152832.1</a> |                                   | receptor    |                       |
| GI_22779876-S | 116.5  | 122.1  | 97.6   | GJA3        | <a href="#">NM_021954.2</a> | CAE2;CAE3;CX46;CZP2;CZP3          | connexon    | connexon visual       |
| GI_22779931-A | 738.7  | 411.9  | 391    | SYNE1       | <a href="#">NM_133650.1</a> | 8B;CPG2;MYNE1;MYNE-1;SYNE-1;SYNE- | lamin       | nuclear Golgi         |
| GI_22779931-I | 90.4   | 86.1   | 84     | SYNE1       | <a href="#">NM_133650.1</a> | 8B;CPG2;MYNE1;MYNE-1;SYNE-1;SYNE- | lamin       | nuclear Golgi         |

|               |        |        |        |            |                             |                                    |            |             |             |
|---------------|--------|--------|--------|------------|-----------------------------|------------------------------------|------------|-------------|-------------|
| GI_22779933-S | 577.9  | 541.6  | 601    | PWDMP      | <a href="#">NM_025132.2</a> | FLJ23127;KIAA1638                  |            |             |             |
| GI_22779935-S | 96.2   | 94.9   | 85.8   | WFDC6      | <a href="#">NM_080827.1</a> | WAP6;C20orf171;dJ461P17.11         | serine     |             |             |
| GI_22902135-S | 167    | 194.3  | 180.7  | SP7        | <a href="#">NM_152860.1</a> | OSX;osterix                        | DNA        | nucleus     | regulation  |
| GI_22907022-S | 285.5  | 464.8  | 512.8  | EPPB9      | <a href="#">NM_015681.2</a> | B9                                 |            |             |             |
| GI_22907024-S | 271.1  | 294.1  | 334.8  | APOBEC3B   | <a href="#">NM_004900.3</a> | ARP4;ARCD3;PHRBNL;APOBEC1L;FLJ2120 | hydrolase  |             |             |
| GI_22907027-S | 115.2  | 122.1  | 106.5  | FBP2       | <a href="#">NM_003837.2</a> |                                    | fructose-  |             | fructose    |
| GI_22907036-S | 3554.2 | 4523.6 | 3553.8 | APOBEC3A   | <a href="#">NM_145699.2</a> | ARP3;PHRBN;phorbolin I             | zinc ion   | cellular_co | mRNA        |
| GI_22907038-S | 389.3  | 480.8  | 461.6  | APOBEC3C   | <a href="#">NM_014508.2</a> | PBI;ARP5;ARDC2;ARDC4;APOBEC1L;MGC  | zinc ion   | cellular_co | biological_ |
| GI_22907040-S | 131.9  | 159.2  | 143.2  | APOBEC3D   | <a href="#">NM_152426.1</a> | ARP6;MGC8979                       | zinc ion   |             |             |
| GI_22907046-S | 379    | 1019.1 | 635.5  | ADORA2B    | <a href="#">NM_000676.2</a> | ADORA2                             | adenosine  | integral to | activation  |
| GI_22907048-S | 246.8  | 302.3  | 256.4  | ALDH3A1    | <a href="#">NM_000691.3</a> | ALDH3;ALDHIII;MGC10406             | aldehyde   | cytosol     | aldehyde    |
| GI_22907051-S | 5284.4 | 5607   | 5612.6 | ARPC1A     | <a href="#">NM_006409.2</a> | SOP2L;SOP2Hs                       | actin      | actin       | actin       |
| GI_22907055-S | 3806.4 | 3373.6 | 4846.6 | ARPC1B     | <a href="#">NM_005720.2</a> | ARC41;p40-ARC;p41-ARC              | structural | Arp2/3      | cell        |
| GI_22907057-S | 434.1  | 563.5  | 436.4  | MED25      | <a href="#">NM_018019.2</a> | FLJ10193                           |            |             |             |
| GI_22907059-S | 145.7  | 157.5  | 150.8  | FLJ10847   | <a href="#">NM_018242.2</a> |                                    | drug       | membran     | multidrug   |
| GI_23065521-S | 386.6  | 433.3  | 362.6  | DKFZp566O0 | <a href="#">NM_015510.3</a> | CGI-93;MGC8916                     |            |             |             |
| GI_23065525-A | 1116   | 1477.6 | 1027.1 | GAS2L1     | <a href="#">NM_152236.1</a> | GAR22;MGC17243                     |            |             | cell growth |
| GI_23065528-I | 327    | 389.8  | 343.6  | GAS2L1     | <a href="#">NM_152237.1</a> | GAR22;MGC17243                     |            |             | cell growth |
| GI_23065531-I | 253.4  | 325.1  | 272.8  | HIF3A      | <a href="#">NM_022462.2</a> | IPAS;HIF-3A                        |            |             |             |
| GI_23065534-I | 169.1  | 197    | 167.5  | HIF3A      | <a href="#">NM_152794.1</a> | IPAS;HIF-3A                        |            |             |             |
| GI_23065537-I | 110.4  | 110.1  | 96.7   | HIF3A      | <a href="#">NM_152795.1</a> | IPAS;HIF-3A                        |            |             |             |
| GI_23065540-A | 102.8  | 99.7   | 101.4  | HIF3A      | <a href="#">NM_152796.1</a> | IPAS;HIF-3A                        |            |             |             |
| GI_23065540-I | 114.1  | 123.4  | 108.7  | HIF3A      | <a href="#">NM_152796.1</a> | IPAS;HIF-3A                        |            |             |             |
| GI_23065543-I | 455.5  | 467.1  | 423.9  | GSTM1      | <a href="#">NM_000561.2</a> | MU;H-B;GST1;GTH4;GTM1;MU-1;GSTM1-  | glutathion | cytoplasm   |             |
| GI_23065546-A | 475.2  | 508.8  | 397.6  | GSTM1      | <a href="#">NM_146421.1</a> | MU;H-B;GST1;GTH4;GTM1;MU-1;GSTM1-  | glutathion | cytoplasm   |             |
| GI_23065549-S | 240.5  | 374.6  | 242.2  | GSTM2      | <a href="#">NM_000848.2</a> | GST4;GSTM;GTHMUS;GSTM2-2           | glutathion |             | glutathion  |
| GI_23065556-I | 267.9  | 316.2  | 299.2  | GSTM4      | <a href="#">NM_147148.1</a> | GTM4;GSTM4-4;MGC9247               | glutathion |             |             |
| GI_23065559-A | 108.3  | 116.5  | 104.7  | GSTM4      | <a href="#">NM_147149.1</a> | GTM4;GSTM4-4;MGC9247               | glutathion |             |             |
| GI_23065562-S | 100.8  | 102.1  | 111.6  | GSTM5      | <a href="#">NM_000851.2</a> | GTM5;GSTM5-5                       | glutathion |             | glutathion  |
| GI_23065565-S | 108.6  | 110.5  | 108.7  | GPR24      | <a href="#">NM_005297.2</a> | SLC1;MCHR1;MGC32129                | neuropepti | integral to | cytosolic   |
| GI_23065568-S | 103.8  | 109    | 91     | GSTA4      | <a href="#">NM_001512.2</a> | GTA4;GSTA4-4                       | glutathion |             | response    |
| GI_23065570-S | 123    | 145.7  | 132.1  | GTPBP1     | <a href="#">NM_004286.3</a> | GP1;GP-1;HSPC018;MGC20069          | GTP        |             | signal      |
| GI_23097237-S | 136.2  | 142.6  | 133.8  | CHST13     | <a href="#">NM_152889.1</a> | C4ST3                              | transferas |             |             |
| GI_23097239-S | 1271.5 | 1419.2 | 1330.5 | DKFZp434K1 | <a href="#">NM_152892.1</a> |                                    |            |             |             |
| GI_23097243-S | 102.2  | 91.5   | 98     | EOS        | <a href="#">NM_152891.1</a> |                                    | trypsin    |             | proteolysis |
| GI_23097245-S | 114.8  | 128.3  | 118.1  | PYC1       | <a href="#">NM_152901.1</a> | POP1                               |            |             |             |
| GI_23097259-S | 136.3  | 129.2  | 155.8  | HCMOGT-1   | <a href="#">NM_152904.1</a> |                                    |            |             |             |
| GI_23097269-S | 625.8  | 733.3  | 653.5  | MGC33894   | <a href="#">NM_152914.1</a> |                                    |            |             |             |
| GI_23097271-S | 124.5  | 127.7  | 120.8  | PAOX       | <a href="#">NM_152911.1</a> | PAO;DKFZp434J245                   |            |             | electron    |
| GI_23097273-S | 187.1  | 224    | 195.3  | DKFZp761L1 | <a href="#">NM_152913.1</a> |                                    |            |             |             |
| GI_23097278-S | 694.9  | 561.9  | 532.6  | C20orf158  | <a href="#">NM_152302.1</a> | MGC16140;dJ885L7.8;DKFZp434P1115   | DNA        | nucleus     | regulation  |
| GI_23097280-S | 148.5  | 153.2  | 153.1  | KIAA1023   | <a href="#">NM_152558.1</a> |                                    |            |             |             |
| GI_23097284-I | 281.1  | 244.2  | 258.8  | 384D8-2    | <a href="#">NM_152299.1</a> | 384D8_6;MGC2455;MGC4133;MGC5305;M  |            |             |             |
| GI_23097291-S | 247.2  | 292.7  | 224.4  | POP1       | <a href="#">NM_015029.1</a> | KIAA0061;MGC17365                  | ribonuclea | nucleolus   | rRNA        |

|               |         |        |        |          |                             |                                         |             |             |              |
|---------------|---------|--------|--------|----------|-----------------------------|-----------------------------------------|-------------|-------------|--------------|
| GI_23097298-I | 453     | 516.1  | 474.4  | PLAC3    | <a href="#">NM_020318.1</a> | PAPPE;PAPP-A2                           |             |             |              |
| GI_23097300-A | 147.1   | 177.9  | 175.3  | PLAC3    | <a href="#">NM_021936.1</a> | PAPPE;PAPP-A2                           |             |             |              |
| GI_23097300-I | 103.3   | 96.8   | 111.8  | PLAC3    | <a href="#">NM_021936.1</a> | PAPPE;PAPP-A2                           |             |             |              |
| GI_23097307-I | 155.9   | 180.1  | 152.7  | SYNE1    | <a href="#">NM_033071.1</a> | 8B;CPG2;MYNE1;MYNE-1;SYNE-1;SYNE-       | lamin       | nuclear     | Golgi        |
| GI_23097309-S | 153.7   | 192.8  | 156.2  | ELOVL3   | <a href="#">NM_152310.1</a> | CIG30;CIG-30;MGC21435                   |             | endoplas    | fatty acid   |
| GI_23097312-S | 133.6   | 133    | 127.4  | FLJ39075 | <a href="#">NM_152340.1</a> |                                         | DNA         | nucleus     | regulation   |
| GI_23097314-S | 1380.9  | 972.8  | 773.3  | ZFP62    | <a href="#">NM_152283.1</a> | ZET;FLJ34231                            |             | nucleus     |              |
| GI_23097320-S | 152.2   | 159.7  | 123.8  | FLJ35863 | <a href="#">NM_152604.1</a> |                                         | nucleic     | nucleus     | regulation   |
| GI_23097324-S | 101.9   | 92.9   | 102.5  | FLJ23754 | <a href="#">NM_152675.1</a> |                                         |             |             |              |
| GI_23097326-S | 101.6   | 101    | 93.9   | FLJ37549 | <a href="#">NM_152605.1</a> |                                         |             |             |              |
| GI_23097330-S | 135.4   | 141.5  | 132.8  | MUC20    | <a href="#">NM_152673.1</a> | FLJ14408;KIAA1359                       |             |             |              |
| GI_23097337-S | 109     | 124.1  | 172    | NXP1     | <a href="#">NM_152745.1</a> | NPH1                                    |             |             |              |
| GI_23097339-A | 185.7   | 202.5  | 181.4  | MAGI-3   | <a href="#">NM_152900.1</a> |                                         | kinase      |             | intracellula |
| GI_23110923-S | 2710.7  | 2723.9 | 2135.3 | PSMB10   | <a href="#">NM_002801.2</a> | LMP10;MECL1;MGC1665                     | peptidase   | 26S         | humoral      |
| GI_23110924-S | 5287    | 6359.2 | 6303.5 | PSMB6    | <a href="#">NM_002798.1</a> | Y;LMPY;DELTA;MGC5169                    | peptidase   | cytosol     | ubiquitin-   |
| GI_23110926-S | 11588.8 | 11582  | 11663  | PSMB7    | <a href="#">NM_002799.2</a> | Z                                       | peptidase   | 26S         | ubiquitin-   |
| GI_23110931-A | 1027    | 1478.2 | 793.1  | PSMB9    | <a href="#">NM_148954.1</a> | LMP2;RING12                             | peptidase   | 26S         | proteolysis  |
| GI_23110933-A | 5225.1  | 6177.1 | 5654.3 | PSMA1    | <a href="#">NM_002786.2</a> | NU;HC2;PROS30;MGC1667;MGC14542;MG       | RNA         | polysome    | ubiquitin-   |
| GI_23110933-I | 1016.8  | 1348.9 | 1039.6 | PSMA1    | <a href="#">NM_002786.2</a> | NU;HC2;PROS30;MGC1667;MGC14542;MG       | RNA         | polysome    | ubiquitin-   |
| GI_23110934-I | 88.4    | 89     | 86.2   | PSMA1    | <a href="#">NM_148976.1</a> | NU;HC2;PROS30;MGC1667;MGC14542;MG       | RNA         | polysome    | ubiquitin-   |
| GI_23110938-A | 1829.2  | 2503.5 | 2117.3 | PSMA3    | <a href="#">NM_152132.1</a> | HC8;PSC3;MGC12306;MGC32631              | peptidase   | 26S         | ubiquitin-   |
| GI_23110940-S | 1949.5  | 2404.9 | 2067.9 | PSMA4    | <a href="#">NM_002789.3</a> | HC9;HsT17706;MGC12467;MGC24813          | peptidase   | 26S         | ubiquitin-   |
| GI_23110941-S | 2843.2  | 3842.2 | 3445.7 | PSMA5    | <a href="#">NM_002790.2</a> | PSC5;ZETA                               | peptidase   | 26S         | ubiquitin-   |
| GI_23110943-S | 2563.1  | 2823.7 | 2224.6 | PSMA6    | <a href="#">NM_002791.1</a> | IOTA;p27K;PROS27;MGC2333;MGC22756;      | peptidase   | cytosol     | ubiquitin-   |
| GI_23110945-A | 10751.2 | 14224  | 15602  | PSMA7    | <a href="#">NM_002792.2</a> | C6;HSPC;RC6-1;XAPC7;MGC3755             | transcripti | 26S         | ubiquitin-   |
| GI_23110947-I | 89.8    | 103.2  | 105.2  | PSMA7    | <a href="#">NM_152255.1</a> | C6;HSPC;RC6-1;XAPC7;MGC3755             | transcripti | 26S         | ubiquitin-   |
| GI_23110949-S | 1205.7  | 1104.7 | 1368.4 | CTSD     | <a href="#">NM_001909.3</a> | CPSD;MGC2311                            | cathepsin   | lysosome    | proteolysis  |
| GI_23110950-I | 123.8   | 128.6  | 114.7  | CTSE     | <a href="#">NM_001910.2</a> |                                         |             |             | proteolysis  |
| GI_23110951-A | 401.5   | 466.6  | 429.9  | CTSE     | <a href="#">NM_148964.1</a> |                                         |             |             | proteolysis  |
| GI_23110953-S | 120.5   | 116    | 123.7  | CTSG     | <a href="#">NM_001911.2</a> | CG;MGC23078                             | cathepsin   | insoluble   | proteolysis  |
| GI_23110956-A | 1208.8  | 867.6  | 726.1  | CTSH     | <a href="#">NM_148979.1</a> | CPSB;MGC1519                            | cathepsin   | lysosome    | proteolysis  |
| GI_23110958-S | 152.4   | 159.4  | 150.3  | CTSK     | <a href="#">NM_000396.2</a> | PKND;CTS02;CTSO1;CTSO2;MGC23107         | cathepsin   | lysosome    | proteolysis  |
| GI_23110959-S | 219.1   | 283.9  | 371.7  | CTSL2    | <a href="#">NM_001333.2</a> | CTSU;CTSV;CATL2                         | cathepsin   | lysosome    | proteolysis  |
| GI_23110961-S | 162.5   | 175.1  | 138    | CTSS     | <a href="#">NM_004079.3</a> | MGC3886                                 | cathepsin   | lysosome    | proteolysis  |
| GI_23110963-S | 306.5   | 352.5  | 326    | CTSW     | <a href="#">NM_001335.2</a> | LYPN                                    | cysteine-   |             | immune       |
| GI_23110965-I | 103.6   | 117.3  | 107.1  | HPS4     | <a href="#">NM_022081.4</a> | LE;KIAA1667                             | protein     | lysosome    | lysosome     |
| GI_23110967-I | 218.3   | 238    | 203.7  | HPS4     | <a href="#">NM_152840.1</a> | LE;KIAA1667                             | protein     | lysosome    | lysosome     |
| GI_23110971-I | 174.4   | 197.2  | 188.7  | HPS4     | <a href="#">NM_152842.1</a> | LE;KIAA1667                             | protein     | lysosome    | lysosome     |
| GI_23110973-A | 214.7   | 252.1  | 223.6  | HPS4     | <a href="#">NM_152843.1</a> | LE;KIAA1667                             | protein     | lysosome    | lysosome     |
| GI_23110975-S | 174.1   | 214.3  | 218.3  | IFNK     | <a href="#">NM_020124.1</a> |                                         | hematopoi   | extracellul | defense      |
| GI_23110977-I | 127.8   | 156.8  | 133.1  | IIGL1    | <a href="#">NM_020070.2</a> | IGO;14.1;IGL1;IGL5;IGLL;IGVPB;CD179b;VP | defense/i   | membran     | immune       |
| GI_23110979-A | 113.2   | 112.1  | 99.4   | IIGL1    | <a href="#">NM_152855.1</a> | IGO;14.1;IGL1;IGL5;IGLL;IGVPB;CD179b;VP | defense/i   | membran     | immune       |
| GI_23110983-I | 103     | 115.8  | 106.2  | KCNJ4    | <a href="#">NM_152868.1</a> | HIR;HRK1;HIRK2;Kir2.3                   | inward      | voltage-    | potassium    |
| GI_23110985-S | 863.6   | 841.6  | 809.1  | PHF16    | <a href="#">NM_014735.2</a> | JADE3;KIAA0215                          | DNA         |             | regulation   |

|               |        |        |        |         |                             |                                      |             |             |              |
|---------------|--------|--------|--------|---------|-----------------------------|--------------------------------------|-------------|-------------|--------------|
| GI_23110986-A | 96.9   | 106.1  | 100.4  | MS4A1   | <a href="#">NM_021950.2</a> | B1;S7;Bp35;CD20;MS4A2;LEU-16;MGC3969 | calcium     | integral to | humoral      |
| GI_23110988-I | 108.5  | 113.1  | 97.4   | MS4A1   | <a href="#">NM_152866.1</a> | B1;S7;Bp35;CD20;MS4A2;LEU-16;MGC3969 | calcium     | integral to | humoral      |
| GI_23110992-S | 104.1  | 92.3   | 97.9   | MS4A3   | <a href="#">NM_006138.3</a> | HTM4;CD20L                           | receptor    | membran     | cell         |
| GI_23110994-A | 98.9   | 96.1   | 94.1   | MS4A4A  | <a href="#">NM_148975.1</a> | MS4A4;MS4A7;4SPAN1;CD20L1;CD20-      |             |             |              |
| GI_23110996-S | 149.5  | 174.5  | 162.6  | MS4A5   | <a href="#">NM_023945.2</a> | TETM4;CD20L2;CD20-L2;MGC34184        | receptor    | integral to |              |
| GI_23110998-S | 114.3  | 134.7  | 117.9  | MS4A6E  | <a href="#">NM_139249.2</a> |                                      | receptor    | integral to |              |
| GI_23110999-S | 105.2  | 108.6  | 89     | MS4A7   | <a href="#">NM_021201.3</a> | CFFM4;MS4A8;CD20L4                   | receptor    | integral to |              |
| GI_23111001-I | 101.5  | 101.3  | 97.5   | MAFF    | <a href="#">NM_012323.2</a> | U-MAF                                | transcripti | nucleus     | parturition  |
| GI_23111002-A | 170.9  | 148.5  | 121.9  | MAFF    | <a href="#">NM_152878.1</a> | U-MAF                                | transcripti | nucleus     | parturition  |
| GI_23111002-I | 105.7  | 97.4   | 85.9   | MAFF    | <a href="#">NM_152878.1</a> | U-MAF                                | transcripti | nucleus     | parturition  |
| GI_23111004-S | 696.6  | 834.6  | 739.8  | MFAP4   | <a href="#">NM_002404.1</a> |                                      | extracellul | extracellul | embryoge     |
| GI_23111006-S | 138.4  | 164.9  | 144.6  | MGC3048 | <a href="#">NM_024052.3</a> |                                      |             |             |              |
| GI_23111008-S | 65.7   | 77.9   | 76.9   | MYOD1   | <a href="#">NM_002478.3</a> | PUM;MYF3;MYOD                        | RNA         | nucleus     | myogenes     |
| GI_23111010-I | 791.3  | 764.4  | 776.8  | RAI1    | <a href="#">NM_017574.1</a> | SMS;SMCR;KIAA1820;MGC12824;DKFZP43   |             |             |              |
| GI_23111012-A | 77.9   | 88     | 81.9   | RAI1    | <a href="#">NM_152256.1</a> | SMS;SMCR;KIAA1820;MGC12824;DKFZP43   |             |             |              |
| GI_23111016-I | 119.1  | 113.5  | 115.5  | RBM10   | <a href="#">NM_005676.3</a> | MGC997;MGC1132;DXS8237E;KIAA0122     |             |             |              |
| GI_23111017-A | 541.1  | 562.1  | 494.6  | RBM10   | <a href="#">NM_152856.1</a> | MGC997;MGC1132;DXS8237E;KIAA0122     |             |             |              |
| GI_23111019-I | 137.3  | 138.3  | 144.2  | RGN     | <a href="#">NM_004683.3</a> | RC;SMP30                             | calcium     |             |              |
| GI_23111020-A | 128.2  | 142.4  | 129.9  | RGN     | <a href="#">NM_152869.1</a> | RC;SMP30                             | calcium     |             |              |
| GI_23111022-S | 665.5  | 691.7  | 147.6  | SNX10   | <a href="#">NM_013322.2</a> | MGC33054                             |             |             |              |
| GI_23111025-A | 501.4  | 588.5  | 633.6  | SNX11   | <a href="#">NM_013323.2</a> |                                      | protein     |             | intracellula |
| GI_23111027-I | 97.5   | 99.5   | 100    | SNX11   | <a href="#">NM_152244.1</a> |                                      | protein     |             | intracellula |
| GI_23111029-S | 166.4  | 178.1  | 187.9  | SNX12   | <a href="#">NM_013346.2</a> |                                      | protein     |             | intracellula |
| GI_23111031-A | 417.7  | 591.6  | 567.6  | SNX1    | <a href="#">NM_148955.1</a> | SNX1A;MGC8664;HsT17379               | protein     | peripheral  | endocytosi   |
| GI_23111037-S | 2334   | 1617.7 | 1224.8 | SNX2    | <a href="#">NM_003100.2</a> | MGC5204                              | protein     | peripheral  | endocytosi   |
| GI_23111040-A | 6359.2 | 6992.2 | 6046.2 | SNX3    | <a href="#">NM_152827.1</a> | SDP3;SNX3A;MGC17570                  |             | peripheral  | endocytosi   |
| GI_23111044-S | 718.3  | 886    | 943.3  | SNX4    | <a href="#">NM_003794.2</a> |                                      | protein     | peripheral  | endocytosi   |
| GI_23111045-A | 559.3  | 506.8  | 271.5  | SNX5    | <a href="#">NM_014426.2</a> | FLJ10931                             |             |             | nonselecti   |
| GI_23111046-I | 589.7  | 708.6  | 347    | SNX5    | <a href="#">NM_152227.1</a> | FLJ10931                             |             |             | nonselecti   |
| GI_23111048-I | 315.3  | 339.2  | 318.4  | SNX6    | <a href="#">NM_021249.2</a> | TFAF2;MGC3157                        |             |             |              |
| GI_23111050-A | 1879.9 | 1475.9 | 1039.3 | SNX6    | <a href="#">NM_152233.1</a> | TFAF2;MGC3157                        |             |             |              |
| GI_23111053-I | 107    | 130.3  | 109    | SNX7    | <a href="#">NM_015976.2</a> | MGC8717;DKFZP564F052                 | protein     |             | intracellula |
| GI_23111054-A | 635.5  | 834.1  | 656.8  | SNX7    | <a href="#">NM_152238.1</a> | MGC8717;DKFZP564F052                 | protein     |             | intracellula |
| GI_23111054-I | 134.7  | 140.7  | 141.5  | SNX7    | <a href="#">NM_152238.1</a> | MGC8717;DKFZP564F052                 | protein     |             | intracellula |
| GI_23111056-S | 98.8   | 116.1  | 86.5   | SNX9    | <a href="#">NM_016224.3</a> | SDP1;WISP;SH3PX1                     | SH3/SH2     |             | protein      |
| GI_23111057-S | 598.3  | 400.8  | 353.5  | OSBPL10 | <a href="#">NM_017784.3</a> | ORP10;OSBP9;FLJ20363                 |             |             | lipid        |
| GI_23111058-S | 212.6  | 254.1  | 255.4  | OSBPL11 | <a href="#">NM_022776.3</a> | ORP11;ORP-                           |             |             | lipid        |
| GI_23111059-S | 537.1  | 554.2  | 592.4  | SF3B4   | <a href="#">NM_005850.3</a> | SAP49;SF3B49;MGC10828                | pre-mRNA    | spliceoso   | mRNA         |
| GI_23111060-S | 557.7  | 584.7  | 521.4  | SFRS11  | <a href="#">NM_004768.2</a> | p54;dJ677H15.2                       | pre-mRNA    | nucleus     | mRNA         |
| GI_23111063-A | 607.1  | 646.6  | 477.8  | SFRS8   | <a href="#">NM_152235.1</a> | SWAP                                 | pre-mRNA    | nucleus     | mRNA         |
| GI_23111065-S | 111.9  | 102.3  | 104.7  | SLC27A2 | <a href="#">NM_003645.2</a> | VLCS;FATP2;VLACS;FACVL1;hFACVL1;HsT  | long-chain- | peroxisom   | very-long-   |
| GI_23111066-S | 112.7  | 130.1  | 120.2  | SPACA1  | <a href="#">NM_030960.2</a> | SAMP32;MGC32952                      |             |             |              |
| GI_23199968-A | 125.2  | 135.9  | 126.6  | TAGAP   | <a href="#">NM_138810.2</a> | FKSG15;FLJ32631;FLJ39771;MGC27381    |             |             |              |
| GI_23199968-I | 80.3   | 84.1   | 96.4   | TAGAP   | <a href="#">NM_138810.2</a> | FKSG15;FLJ32631;FLJ39771;MGC27381    |             |             |              |

|               |        |        |        |           |                             |                                    |              |             |             |
|---------------|--------|--------|--------|-----------|-----------------------------|------------------------------------|--------------|-------------|-------------|
| GI_23199972-I | 521.9  | 510.7  | 518.4  | WTAP      | <a href="#">NM_004906.3</a> | MGC3925;KIAA0105                   |              |             |             |
| GI_23199973-A | 705.7  | 671.8  | 547.4  | WTAP      | <a href="#">NM_152857.1</a> | MGC3925;KIAA0105                   |              |             |             |
| GI_23199973-I | 103.8  | 109.8  | 102.9  | WTAP      | <a href="#">NM_152857.1</a> | MGC3925;KIAA0105                   |              |             |             |
| GI_23199977-A | 1505.3 | 1861.2 | 1573.6 | WIG1      | <a href="#">NM_152240.1</a> | WIG-1;PAG608;FLJ12296;MGC10613     |              |             |             |
| GI_23199980-S | 524.8  | 582.9  | 573.4  | WIRE      | <a href="#">NM_133264.2</a> | FLJ23260;FLJ30495;DKFZp547N082     |              |             |             |
| GI_23199981-S | 221.3  | 274.9  | 231.5  | ZNF179    | <a href="#">NM_007148.2</a> | BFP;RNF112                         | zinc ion     | cellular_co | biological_ |
| GI_23199982-S | 951.8  | 1133   | 847.8  | PIGK      | <a href="#">NM_005482.1</a> | GPI8;MGC22559                      | GPI-         |             | GPI         |
| GI_23199984-S | 102.4  | 97     | 92.8   | ULK2      | <a href="#">NM_014683.2</a> | KIAA0623                           | protein-     |             | protein     |
| GI_23199988-S | 347.2  | 425.5  | 385.2  | CXCL14    | <a href="#">NM_004887.3</a> | KS1;Kec;BMAC;BRAK;NJAC;MIP-        | chemokine    | extracellul | chemotaxi   |
| GI_23199992-S | 281.6  | 337.5  | 279.7  | LIG4      | <a href="#">NM_002312.2</a> |                                    | DNA          | nucleus     | single      |
| GI_23199994-S | 1686.6 | 1484.3 | 1351   | WBSCR22   | <a href="#">NM_017528.2</a> | WBMT;PP3381;HUSSY-                 | S-           | nucleus     | biological_ |
| GI_23199996-I | 138.3  | 127.5  | 120.7  | WBSCR20A  | <a href="#">NM_018044.2</a> | NOL1R;MGC986;WBSCR20;FLJ10267;p120 |              |             |             |
| GI_23199997-A | 597.7  | 583.5  | 691.7  | WBSCR20A  | <a href="#">NM_148956.1</a> | NOL1R;MGC986;WBSCR20;FLJ10267;p120 |              |             |             |
| GI_23200001-A | 329.2  | 392.6  | 442.1  | WBSCR20C  | <a href="#">NM_148936.1</a> | NOL1R2;FLJ11626;MGC15057;WBSCR20B; |              |             |             |
| GI_23200003-I | 113.1  | 113.3  | 107.5  | WBSCR20C  | <a href="#">NM_148980.1</a> | NOL1R2;FLJ11626;MGC15057;WBSCR20B; |              |             |             |
| GI_23200005-I | 212.9  | 276.9  | 209.9  | WBSCR20C  | <a href="#">NM_149379.1</a> | NOL1R2;FLJ11626;MGC15057;WBSCR20B; |              |             |             |
| GI_23200009-I | 119.1  | 135.8  | 133.5  | WBSCR21   | <a href="#">NM_031295.2</a> | PP1226                             |              |             |             |
| GI_23200013-A | 138.4  | 168.3  | 161.5  | WBSCR21   | <a href="#">NM_148914.1</a> | PP1226                             |              |             |             |
| GI_23200017-I | 155.9  | 179.2  | 155.9  | WBSCR21   | <a href="#">NM_148916.1</a> | PP1226                             |              |             |             |
| GI_23200030-A | 714.9  | 691.6  | 556.6  | TNFRSF25  | <a href="#">NM_148970.1</a> | DR3;TR3;DDR3;LARD;APO-3;TRAMP;WSL- | NGF/TNF      | cytosol     | induction   |
| GI_23200040-S | 756.7  | 678.2  | 816.4  | TNFRSF14  | <a href="#">NM_003820.2</a> | TR2;ATAR;HVEA;HVEM;LIGHTR          | NGF/TNF      | integral to | cell        |
| GI_23238186-I | 235.2  | 307.5  | 259.6  | TES       | <a href="#">NM_015641.2</a> | TESS;TESS-                         |              |             |             |
| GI_23238187-A | 271.8  | 485.1  | 413.7  | TES       | <a href="#">NM_152829.1</a> | TESS;TESS-                         |              |             |             |
| GI_23238189-S | 129.6  | 147.8  | 146    | WFDC9     | <a href="#">NM_147198.2</a> | WAP9;dJ688G8.2                     |              |             |             |
| GI_23238191-S | 100.5  | 118.5  | 109    | TNFRSF17  | <a href="#">NM_001192.2</a> | BCM;BCMA                           | receptor     | integral to | signal      |
| GI_23238193-A | 111.4  | 122.4  | 113.7  | TNFRSF18  | <a href="#">NM_148901.1</a> | AITR;GITR;GITR-D                   | NGF/TNF      | integral to | anti-       |
| GI_23238195-S | 144.9  | 469.5  | 108.7  | IL2RB     | <a href="#">NM_000878.2</a> | P70-75                             | interleukin- | integral to | signal      |
| GI_23238198-I | 109.5  | 103.6  | 117.9  | TNFRSF19L | <a href="#">NM_032871.3</a> | RELT;FLJ14993                      | receptor     | integral to |             |
| GI_23238199-A | 126.6  | 129.7  | 131.3  | TNFRSF19L | <a href="#">NM_152222.1</a> | RELT;FLJ14993                      | receptor     | integral to |             |
| GI_23238199-I | 113.9  | 128.7  | 127.3  | TNFRSF19L | <a href="#">NM_152222.1</a> | RELT;FLJ14993                      | receptor     | integral to |             |
| GI_23238201-A | 113.8  | 157.3  | 142.6  | TNFRSF19  | <a href="#">NM_018647.2</a> | TAJ;TROY;TRADE;TAJ-alpha           | tumor        | integral to | JNK         |
| GI_23238201-I | 108.1  | 124.9  | 122.9  | TNFRSF19  | <a href="#">NM_018647.2</a> | TAJ;TROY;TRADE;TAJ-alpha           | tumor        | integral to | JNK         |
| GI_23238205-S | 201.7  | 249.3  | 232.4  | TNFRSF13B | <a href="#">NM_012452.2</a> | TAC1                               | receptor     | integral to | cell        |
| GI_23238206-S | 3372.7 | 4361.9 | 2470.8 | TNFRSF21  | <a href="#">NM_014452.3</a> | DR6;BM-018                         |              |             |             |
| GI_23238207-S | 163.7  | 186.1  | 177.7  | IL17R     | <a href="#">NM_014339.3</a> | IL17RA;IL-17RA;hIL-17R;MGC10262    | receptor     | integral to | cell        |
| GI_23238209-A | 9364.7 | 9592.2 | 9861.4 | ARPC2     | <a href="#">NM_005731.2</a> | ARC34;PRO2446;p34-Arc;PNAS-139     | structural   | Arp2/3      | cell        |
| GI_23238209-I | 711.1  | 939    | 838.5  | ARPC2     | <a href="#">NM_005731.2</a> | ARC34;PRO2446;p34-Arc;PNAS-139     | structural   | Arp2/3      | cell        |
| GI_23238210-I | 167    | 197.3  | 168.2  | ARPC2     | <a href="#">NM_152862.1</a> | ARC34;PRO2446;p34-Arc;PNAS-139     | structural   | Arp2/3      | cell        |
| GI_23238212-S | 3265.8 | 3854.1 | 3287   | ARPC5     | <a href="#">NM_005717.2</a> | ARC16;p16-ARC;dJ127C7.3            | structural   | Arp2/3      | actin       |
| GI_23238213-A | 126.6  | 133.9  | 123.1  | ACE       | <a href="#">NM_152830.1</a> | DCP;ACE1;DCP1;CD143;MGC26566       | peptidyl-    | soluble     | regulation  |
| GI_23238215-A | 86.5   | 94.1   | 86.7   | ACE       | <a href="#">NM_152831.1</a> | DCP;ACE1;DCP1;CD143;MGC26566       | peptidyl-    | soluble     | regulation  |
| GI_23238215-I | 117.9  | 103.9  | 106.3  | ACE       | <a href="#">NM_152831.1</a> | DCP;ACE1;DCP1;CD143;MGC26566       | peptidyl-    | soluble     | regulation  |
| GI_23238217-I | 119.8  | 122.6  | 112.5  | ACE       | <a href="#">NM_000789.2</a> | DCP;ACE1;DCP1;CD143;MGC26566       | peptidyl-    | soluble     | regulation  |
| GI_23238218-S | 305    | 394.8  | 373.9  | DMC1      | <a href="#">NM_007068.2</a> | DMC1H;LIM15;HsLim15;dJ199H16.1     | ATP          | meiotic     | meiosis     |

|               |        |        |        |          |                             |                                     |             |             |              |
|---------------|--------|--------|--------|----------|-----------------------------|-------------------------------------|-------------|-------------|--------------|
| GI_23238220-S | 7295.9 | 5620.3 | 4498.1 | EIF3S7   | <a href="#">NM_003753.2</a> | MGC17258;eIF3-p66;eIF3-zeta         | translation | eukaryotic  | regulation   |
| GI_23238221-S | 957.4  | 974.3  | 972.6  | COPS3    | <a href="#">NM_003653.2</a> | SGN3                                |             | cytoplasm   | response     |
| GI_23238227-S | 242.4  | 295.4  | 231.2  | CHST7    | <a href="#">NM_019886.2</a> | C6ST-2                              | sulfotransf |             |              |
| GI_23238230-A | 639.7  | 763.6  | 1047.1 | HMGN3    | <a href="#">NM_138730.1</a> | TRIP7;PNAS-24                       | transcripti |             | transcripti  |
| GI_23238232-S | 2557.9 | 2358.4 | 1800.3 | HMGN4    | <a href="#">NM_006353.2</a> | NHC;HMG17L3;MGC5145                 | DNA         | chromatin   | regulation   |
| GI_23238233-A | 112    | 126.6  | 111.7  | MS4A6A   | <a href="#">NM_022349.2</a> | CDA01;MS4A6;4SPAN3;CD20L3;4SPAN3.2; | receptor    | integral to |              |
| GI_23238233-I | 122.5  | 131.1  | 130.8  | MS4A6A   | <a href="#">NM_022349.2</a> | CDA01;MS4A6;4SPAN3;CD20L3;4SPAN3.2; | receptor    | integral to |              |
| GI_23238239-S | 104.5  | 106.6  | 116.8  | AGTR2    | <a href="#">NM_000686.3</a> | AT2                                 | angiotensi  | integral to | regulation   |
| GI_23238241-S | 180.2  | 199.3  | 184.6  | WFDC5    | <a href="#">NM_145652.2</a> | PRG5;WAP1;dJ211D12.5                | serine      |             |              |
| GI_23238242-S | 312.8  | 429.2  | 424.1  | SNX13    | <a href="#">NM_015132.2</a> | RGS-PX1;KIAA0713                    |             |             |              |
| GI_23238243-I | 85.4   | 96.2   | 86.8   | SNX16    | <a href="#">NM_022133.2</a> | DKFZp666H147                        | protein     | kinesin     | intracellula |
| GI_23238247-A | 501.5  | 461.5  | 361.3  | SNX16    | <a href="#">NM_152837.1</a> | DKFZp666H147                        | protein     | kinesin     | intracellula |
| GI_23238249-S | 1427.9 | 2066.8 | 2254   | SNX17    | <a href="#">NM_014748.2</a> | KIAA0064                            | protein C-  | early       | neuropepti   |
| GI_23238250-S | 574.9  | 397.6  | 496.3  | TIGD5    | <a href="#">NM_032862.2</a> | FLJ14926;MGC44883                   | DNA         | nucleus     |              |
| GI_23238255-A | 158.9  | 188    | 168.9  | CPT1B    | <a href="#">NM_152246.1</a> | CPT1-M;M-CPT1;KIAA1670              | carnitine   | mitochond   | fatty acid   |
| GI_23238259-A | 202.1  | 218.3  | 190.2  | CHKL     | <a href="#">NM_005198.3</a> | CHETK                               | choline     |             |              |
| GI_23238259-I | 446.7  | 501.8  | 390.8  | CHKL     | <a href="#">NM_005198.3</a> | CHETK                               | choline     |             |              |
| GI_23270402-A | 603.4  | 755.2  | 693.2  | CRYZL1   | <a href="#">NM_005111.5</a> | 4P11;QOH-1                          | NADPH:q     |             |              |
| GI_23308500-S | 190.8  | 223.1  | 214.9  | FLJ31606 | <a href="#">NM_153025.1</a> |                                     |             |             |              |
| GI_23308504-S | 302.1  | 342.7  | 316.1  | FLJ32112 | <a href="#">NM_153035.1</a> |                                     |             |             | transcripti  |
| GI_23308506-S | 170.3  | 207.1  | 203.1  | FLJ31166 | <a href="#">NM_153022.1</a> |                                     |             |             |              |
| GI_23308508-S | 100.9  | 101.2  | 98.6   | FLJ31958 | <a href="#">NM_153030.1</a> |                                     |             |             |              |
| GI_23308510-S | 122.2  | 117.8  | 115.3  | FLJ30726 | <a href="#">NM_153018.1</a> |                                     |             | nucleus     |              |
| GI_23308512-S | 111.3  | 123.1  | 112.4  | FLJ32831 | <a href="#">NM_153040.1</a> |                                     |             |             |              |
| GI_23308516-S | 279.9  | 271.4  | 256    | ZNF75A   | <a href="#">NM_153028.1</a> | FLJ31529                            | nucleic     | nucleus     | regulation   |
| GI_23308518-S | 415.2  | 595.9  | 378.5  | PRICKLE1 | <a href="#">NM_153026.1</a> | RILP;FLJ31627;FLJ31937              |             |             |              |
| GI_23308520-S | 383.9  | 445.6  | 484.3  | FLJ30634 | <a href="#">NM_153014.1</a> |                                     |             |             |              |
| GI_23308524-S | 234.6  | 268.9  | 278.8  | FLJ35801 | <a href="#">NM_153044.1</a> |                                     |             |             |              |
| GI_23308526-S | 119.8  | 119.4  | 121.1  | FLJ30679 | <a href="#">NM_153017.1</a> |                                     |             |             |              |
| GI_23308528-S | 167.5  | 206.8  | 180.5  | FLJ32063 | <a href="#">NM_153031.1</a> |                                     |             |             |              |
| GI_23308530-S | 182.1  | 191.4  | 179.9  | FLJ30430 | <a href="#">NM_153009.1</a> |                                     |             |             |              |
| GI_23308532-S | 85     | 91.2   | 78.8   | FLJ30594 | <a href="#">NM_153011.1</a> |                                     | nucleic     |             |              |
| GI_23308536-S | 97.4   | 105.6  | 95.2   | FLJ32447 | <a href="#">NM_153038.1</a> |                                     |             |             |              |
| GI_23308538-S | 319    | 399.4  | 364.3  | FLJ32955 | <a href="#">NM_153041.1</a> |                                     |             |             |              |
| GI_23308540-S | 217    | 196.7  | 214.4  | FLJ31659 | <a href="#">NM_153027.1</a> |                                     |             |             |              |
| GI_23308544-S | 95     | 90.7   | 89.7   | FLJ30668 | <a href="#">NM_153015.1</a> |                                     |             |             |              |
| GI_23308546-S | 521.1  | 442.8  | 409.7  | FLJ32803 | <a href="#">NM_153039.1</a> |                                     |             |             |              |
| GI_23308548-S | 107.3  | 108.3  | 106.7  | FLJ32065 | <a href="#">NM_153032.1</a> |                                     |             |             |              |
| GI_23308550-S | 104.4  | 111.7  | 109.9  | KCTD7    | <a href="#">NM_153033.1</a> | FLJ32069                            | voltage-    | membran     | potassium    |
| GI_23308552-S | 265.2  | 327.4  | 289.9  | SPATA13  | <a href="#">NM_153023.1</a> | FLJ31208                            | DNA         | nucleus     | chromoso     |
| GI_23308556-S | 116.9  | 110    | 98.7   | FLJ32293 | <a href="#">NM_153037.1</a> |                                     |             |             |              |
| GI_23308558-S | 149.8  | 143.5  | 121.9  | FLJ31393 | <a href="#">NM_153024.1</a> |                                     | olfactory   | integral to | G-protein    |
| GI_23308560-S | 103.5  | 100.7  | 102.9  | RNPC6    | <a href="#">NM_153020.1</a> | FLJ30829;dJ259A10.1                 |             |             |              |
| GI_23308562-S | 181.4  | 210.5  | 200.6  | C6orf78  | <a href="#">NM_153036.1</a> | FLJ32239                            |             |             |              |

|               |         |        |        |          |                             |                                      |              |                         |
|---------------|---------|--------|--------|----------|-----------------------------|--------------------------------------|--------------|-------------------------|
| GI_23308566-S | 95.1    | 118    | 103.5  | ASRGL1   | <a href="#">NM_025080.2</a> | ALP;ALP1;FLJ22316                    | asparagin    | glycoprote              |
| GI_23308570-S | 106.8   | 108.3  | 104.3  | SLC3A1   | <a href="#">NM_000341.2</a> | D2H;ATR1;NBAT;RBAT;CSNU1             | amino        | membran basic           |
| GI_23308571-S | 722.3   | 1169.9 | 1159.2 | LENG4    | <a href="#">NM_024298.2</a> | BB1                                  |              |                         |
| GI_23308573-S | 493.1   | 403.8  | 371.4  | SPRY4    | <a href="#">NM_030964.2</a> |                                      |              |                         |
| GI_23308576-S | 13505.5 | 7954.4 | 3274.3 | PHGDH    | <a href="#">NM_006623.2</a> | PDG;PGD;PGAD;PGDH;SERA;3PGDH;MGC     | phosphogl    | brain                   |
| GI_23308578-S | 5143.7  | 5909.7 | 5372.5 | TEBP     | <a href="#">NM_006601.4</a> | P23                                  | protein      | signal                  |
| GI_23308584-S | 128.4   | 142.8  | 135.4  | GPR156   | <a href="#">NM_153002.1</a> | PGR28;GABABL                         | GABA-B       | membran peroxidas       |
| GI_23308586-S | 141.8   | 142.3  | 142    | NAGS     | <a href="#">NM_153006.1</a> | NAT7;FLJ23827                        | acyltransf   | amino                   |
| GI_23308590-S | 143     | 158    | 153.8  | C4orf7   | <a href="#">NM_152997.1</a> | FDC-SP                               |              |                         |
| GI_23308598-S | 96.6    | 91.6   | 88.5   | OFCC1    | <a href="#">NM_153003.1</a> | MRDS1                                |              |                         |
| GI_23308602-S | 111.5   | 110.3  | 99.2   | MYRIP    | <a href="#">NM_015460.1</a> | SLAC2C;SLAC2-C;DKFZp586F1018         | actin        |                         |
| GI_23308686-A | 110.2   | 139.9  | 122.8  | KIAA0889 | <a href="#">NM_152257.1</a> | dJ469A13.6.1                         |              |                         |
| GI_23308686-I | 89.9    | 105.4  | 91.5   | KIAA0889 | <a href="#">NM_152257.1</a> | dJ469A13.6.1                         |              |                         |
| GI_23308688-S | 1083.9  | 1037.5 | 1160   | C18B11   | <a href="#">NM_152260.1</a> |                                      |              |                         |
| GI_23308690-S | 105.9   | 97.3   | 96.8   | BTBD9    | <a href="#">NM_152733.1</a> | KIAA1880;dJ322112.1                  | protein      |                         |
| GI_23308696-S | 1326.3  | 1953.4 | 1837.6 | SRPR     | <a href="#">NM_003139.2</a> | DP;MGC3650;MGC9571;Sralpha;MGC17355  | signal       | signal cotranslati      |
| GI_23308700-S | 451.7   | 508.4  | 425.3  | DRB1     | <a href="#">NM_152945.1</a> |                                      | nucleic      |                         |
| GI_23308723-S | 116.3   | 119.4  | 115.1  | SIAT7C   | <a href="#">NM_152996.1</a> | ST6GALNACIII                         | sialyltransf | membran protein         |
| GI_23308726-S | 178.1   | 224.2  | 186.4  | TGFB2    | <a href="#">NM_003242.3</a> | HNPPC6                               | type II      | integral to TGFbeta     |
| GI_23308728-A | 107.6   | 106.4  | 97.1   | ZNF268   | <a href="#">NM_003415.1</a> | HZF3                                 | transcripti  | nucleus developm        |
| GI_23308730-S | 2936.4  | 3071   | 2841.5 | TRIP6    | <a href="#">NM_003302.1</a> | OIP1;ZRP-                            | protein      | cellular_co biological_ |
| GI_23308736-S | 308.1   | 313.9  | 237.3  | ZNF23    | <a href="#">NM_145911.1</a> | KOX16;ZNF359                         | DNA          | nucleus developm        |
| GI_23308744-S | 106.2   | 106.8  | 96.9   | C2orf132 | <a href="#">NM_152503.1</a> | FLJ36113;dJ621N11.4;DKFZp434N0426    |              |                         |
| GI_23308748-S | 219.6   | 252.8  | 229.9  | C2orf147 | <a href="#">NM_152667.1</a> | MGC26833;dJ694B14.3                  | hydrolase    | metabolis               |
| GI_23312361-I | 110.8   | 122.9  | 104.1  | UHRF2    | <a href="#">NM_152306.2</a> | NIRF;URF2;RNF107;MGC33463            | DNA          | regulation              |
| GI_23312363-A | 642.6   | 464.2  | 317.8  | UHRF2    | <a href="#">NM_152896.1</a> | NIRF;URF2;RNF107;MGC33463            | DNA          | regulation              |
| GI_23312365-S | 134.9   | 136.2  | 131.1  | TNFRSF1B | <a href="#">NM_001066.2</a> | p75;TBPII;TNFBR;TNFR2;CD120b;TNFR80; | tumor        | integral to apoptosis   |
| GI_23312366-S | 206     | 275.1  | 194.4  | TNFRSF4  | <a href="#">NM_003327.2</a> | OX40;ACT35;CD134;TXGP1L              | NGF/TNF      | integral to immune      |
| GI_23312370-A | 106.5   | 121.3  | 84.7   | TNFRSF5  | <a href="#">NM_152854.1</a> | p50;Bp50;CD40;CDW40;MGC9013          | receptor     | proteoglyc developm     |
| GI_23312372-S | 3327.4  | 3455.7 | 2796.4 | TNFRSF1A | <a href="#">NM_001065.2</a> | FPF;p55;p60;TBP1;TNF-                | tumor        | extracellul signal      |
| GI_23312375-A | 128.9   | 157    | 119.9  | PPEF1    | <a href="#">NM_152225.1</a> | PP7;PPEF;PPP7C                       | protein      | protein                 |
| GI_23312381-I | 95.8    | 98.7   | 90.5   | PPEF2    | <a href="#">NM_152933.1</a> |                                      | protein      | protein                 |
| GI_23312385-A | 144.6   | 158.2  | 148.3  | PPEF2    | <a href="#">NM_006239.2</a> |                                      | protein      | protein                 |
| GI_23312387-I | 84.7    | 89.3   | 87.5   | CHRFAM7A | <a href="#">NM_139320.1</a> | D-10;CHRNA7-DR1                      |              |                         |
| GI_23312389-A | 107.3   | 100.9  | 113.2  | CHRFAM7A | <a href="#">NM_148911.1</a> | D-10;CHRNA7-DR1                      |              |                         |
| GI_23312391-S | 341.9   | 316.2  | 311.9  | TIGD2    | <a href="#">NM_145715.1</a> |                                      |              |                         |
| GI_23312393-S | 90.6    | 75.9   | 88.4   | TIGD3    | <a href="#">NM_145719.1</a> |                                      |              |                         |
| GI_23346408-S | 1998.4  | 1915.7 | 2297.2 | C2orf111 | <a href="#">NM_016470.6</a> | HSPC207;dJ1183I21.1                  |              |                         |
| GI_23346411-S | 217     | 230.7  | 236.1  | TAIP-2   | <a href="#">NM_024969.2</a> | FLJ11703                             |              | nucleus apoptosis       |
| GI_23346413-S | 1673.2  | 1418.4 | 1074.2 | MARK3    | <a href="#">NM_002376.3</a> | KP78;CTAK1;PAR1A                     | protein-     | protein                 |
| GI_23346417-S | 715.5   | 571.2  | 513.6  | MINA     | <a href="#">NM_032778.3</a> | MDIG;MINA53;FLJ14393                 |              |                         |
| GI_23346419-S | 265.1   | 299    | 255.7  | NFRKB    | <a href="#">NM_006165.2</a> |                                      | specific     | nucleus transcripti     |
| GI_23346423-S | 84.2    | 89.6   | 97.1   | IGSF4D   | <a href="#">NM_153184.1</a> | NECL3                                |              |                         |
| GI_23346425-S | 10222.7 | 10289  | 8785.4 | ATP5A1   | <a href="#">NM_004046.3</a> | OMR;ORM;ATPM;ATP5A;hATP1;ATP5AL2     | transporte   | proton- ATP             |



|               |        |        |        |          |                             |                             |            |              |              |
|---------------|--------|--------|--------|----------|-----------------------------|-----------------------------|------------|--------------|--------------|
| GI_23346426-S | 1824.3 | 1680.4 | 1921.2 | C21orf56 | <a href="#">NM_032261.3</a> | DKFZp434N0650               |            |              |              |
| GI_23346635-S | 121.5  | 117.9  | 108.5  | DHH      | <a href="#">NM_021044.2</a> | HHG-3;MGC35145              | peptidase  | developm     |              |
| GI_23346636-S | 297.7  | 231.2  | 188.2  | PRO1580  | <a href="#">NM_018502.2</a> |                             |            |              |              |
| GI_23346638-S | 1806.5 | 1590.1 | 1644.4 | TUSC4    | <a href="#">NM_006545.3</a> | NPR2L;NPRL2                 |            |              |              |
| GI_23397408-S | 115.7  | 137.3  | 123.6  | MGC23947 | <a href="#">NM_152278.1</a> | MPMGp800C04260Q003          |            |              |              |
| GI_23397426-S | 1455.4 | 2588.3 | 2518.9 | SYNCRIP  | <a href="#">NM_006372.3</a> | pp68;NSAP1;GRY-RBP;dJ3J17.2 | ribonucleo | nucleus      | RNA          |
| GI_23397428-S | 8627.2 | 8519.3 | 7030.1 | GA17     | <a href="#">NM_006360.2</a> |                             |            |              |              |
| GI_23397430-S | 113.9  | 132.5  | 132.7  | C21orf74 | <a href="#">NM_153203.1</a> | PRED16                      |            |              |              |
| GI_23397448-S | 112.3  | 116.7  | 118.9  | C21orf90 | <a href="#">NM_153204.1</a> |                             |            |              |              |
| GI_23397450-S | 133.9  | 137.3  | 126.5  | AMICA    | <a href="#">NM_153206.1</a> | JAML;FLJ37080               |            |              |              |
| GI_23397455-S | 468.3  | 496.1  | 242.4  | MGC35048 | <a href="#">NM_153208.1</a> |                             |            |              |              |
| GI_23397457-S | 135.5  | 149.6  | 125.5  | FLJ37300 | <a href="#">NM_153209.1</a> |                             |            |              |              |
| GI_23397461-S | 485.2  | 583.3  | 561.1  | FLJ33761 | <a href="#">NM_153211.1</a> |                             |            |              |              |
| GI_23397463-S | 113    | 113.9  | 111    | GJB4     | <a href="#">NM_153212.1</a> | CX30.3;MGC21116             | connexon   | integral to  | perception   |
| GI_23397470-S | 108.5  | 126    | 108.7  | FLJ37440 | <a href="#">NM_153214.1</a> |                             | calcium    |              |              |
| GI_23397472-S | 99.9   | 98.9   | 96.6   | FLJ38608 | <a href="#">NM_153215.1</a> |                             |            |              |              |
| GI_23397474-S | 103.1  | 121.3  | 110.8  | MGC13034 | <a href="#">NM_153217.1</a> |                             |            |              |              |
| GI_23397476-S | 105    | 125.3  | 110.8  | FLJ38725 | <a href="#">NM_153218.1</a> |                             | electron   |              | electron     |
| GI_23397482-S | 215    | 229    | 199.6  | FLJ36090 | <a href="#">NM_153223.1</a> |                             |            |              |              |
| GI_23397486-S | 111.5  | 137.8  | 126.4  | RPESP    | <a href="#">NM_153225.1</a> | FLJ40021                    |            |              |              |
| GI_23397491-S | 264.6  | 252.1  | 296.1  | TMEM20   | <a href="#">NM_153226.1</a> | C10orf60;FLJ33990           |            | membran      |              |
| GI_23397493-S | 101.7  | 115.5  | 111.3  | MGC34800 | <a href="#">NM_153227.1</a> |                             |            |              |              |
| GI_23397495-S | 102.6  | 116.4  | 98.4   | FLJ38335 | <a href="#">NM_153228.1</a> |                             |            |              |              |
| GI_23397497-S | 105    | 126.5  | 100    | FLJ33318 | <a href="#">NM_153229.1</a> |                             |            |              |              |
| GI_23397499-S | 96.8   | 105.3  | 86.3   | MGC35179 | <a href="#">NM_153230.1</a> |                             |            |              |              |
| GI_23397509-S | 183.6  | 220.3  | 202.2  | FLJ36445 | <a href="#">NM_153233.1</a> |                             |            |              |              |
| GI_23397517-S | 70.3   | 88     | 85.9   | MGC34760 | <a href="#">NM_153237.1</a> |                             |            |              |              |
| GI_23397519-S | 96.3   | 112    | 97.3   | MGC22001 | <a href="#">NM_153238.1</a> |                             |            |              |              |
| GI_23397529-S | 85.4   | 103.2  | 91.9   | MGC42157 | <a href="#">NM_153241.1</a> |                             |            |              |              |
| GI_23397531-S | 120.4  | 133.7  | 121.5  | MGC35468 | <a href="#">NM_153244.1</a> |                             |            |              |              |
| GI_23397533-S | 116.6  | 134.3  | 111.8  | MGC45491 | <a href="#">NM_153246.1</a> |                             |            |              |              |
| GI_23397535-S | 506.3  | 703.8  | 424.7  | SLC29A4  | <a href="#">NM_153247.1</a> | ENT4;FLJ34923               | nucleoside | membran      | transport    |
| GI_23397543-S | 126.3  | 146.7  | 141    | FLJ36119 | <a href="#">NM_153254.1</a> |                             | tubulin-   |              | protein      |
| GI_23397553-S | 162.2  | 160    | 181.8  | FLJ36812 | <a href="#">NM_153260.1</a> |                             |            |              |              |
| GI_23397557-S | 140.9  | 162.4  | 139.2  | SYT14    | <a href="#">NM_153262.1</a> | sytXIV;FLJ34198             | transporte | membran      | transport    |
| GI_23397559-S | 613.9  | 723.6  | 611.5  | ZNF549   | <a href="#">NM_153263.1</a> | FLJ34917                    | nucleic    | intracellula | regulation   |
| GI_23397563-S | 2014.7 | 1770.5 | 1561.8 | FLJ35827 | <a href="#">NM_153265.1</a> |                             |            |              |              |
| GI_23397569-S | 110.2  | 106.7  | 85.3   | FLJ31579 | <a href="#">NM_153268.1</a> |                             | phospholi  |              | intracellula |
| GI_23397571-S | 88.5   | 100.1  | 97.3   | FLJ34960 | <a href="#">NM_153270.1</a> |                             | protein    |              |              |
| GI_23397573-S | 438.3  | 466.2  | 448.5  | MGC32065 | <a href="#">NM_153271.1</a> |                             |            |              |              |
| GI_23397575-S | 111.6  | 104.7  | 109.9  | VMD2L2   | <a href="#">NM_153274.1</a> |                             | molecular  | integral to  | biological_  |
| GI_23397638-A | 157.8  | 177.2  | 166.9  | EMR3     | <a href="#">NM_152939.1</a> |                             | G-protein  | membran      | neuropepti   |
| GI_23397640-S | 107.6  | 119.8  | 102    | MS4A2    | <a href="#">NM_000139.2</a> | FCERI;MS4A1;FCER1B          | receptor   | integral to  | immune       |
| GI_23397641-I | 228.2  | 243.9  | 180.9  | GREB1    | <a href="#">NM_014668.2</a> | KIAA0575                    |            |              |              |

|               |        |        |        |          |                             |                                    |             |              |             |
|---------------|--------|--------|--------|----------|-----------------------------|------------------------------------|-------------|--------------|-------------|
| GI_23397643-I | 101    | 112.8  | 91.7   | GREB1    | <a href="#">NM_033090.1</a> | KIAA0575                           |             |              |             |
| GI_23397645-A | 90.5   | 101.9  | 88.7   | GREB1    | <a href="#">NM_148903.1</a> | KIAA0575                           |             |              |             |
| GI_23397645-I | 92.3   | 84     | 91.5   | GREB1    | <a href="#">NM_148903.1</a> | KIAA0575                           |             |              |             |
| GI_23397647-I | 288.9  | 354.3  | 330.6  | PIGO     | <a href="#">NM_032634.2</a> | MGC3079;FLJ00135;MGC20536;DKFZp434 | molecular   | endoplas     | GPI         |
| GI_23397651-S | 649.1  | 1085.2 | 1079.9 | PIGS     | <a href="#">NM_033198.2</a> |                                    |             |              |             |
| GI_23397652-S | 4868.4 | 4687.9 | 6973.3 | PIGT     | <a href="#">NM_015937.2</a> | CGI-06;MGC8909                     |             |              |             |
| GI_23397656-A | 98.9   | 113.9  | 105.9  | ABHD1    | <a href="#">NM_152870.1</a> | LABH1;FLJ36128                     | molecular   |              |             |
| GI_23397665-S | 1045   | 1110.5 | 992.1  | SIN3A    | <a href="#">NM_015477.1</a> | KIAA0700;DKFZP434K2235             | transcripti | nucleus      | regulation  |
| GI_23397667-S | 5365   | 7258.3 | 6720   | ARPC3    | <a href="#">NM_005719.2</a> | ARC21;p21-Arc                      | structural  | Arp2/3       | cell        |
| GI_23397668-S | 1239.8 | 1732.5 | 2088.4 | ARPC4    | <a href="#">NM_005718.2</a> | ARC20;p20-ARC;MGC13544             | structural  | Arp2/3       | cell        |
| GI_23397671-S | 102.7  | 116.7  | 111.5  | HOXD4    | <a href="#">NM_014621.2</a> | HOX4;HOX4B;HHO.C13;HOX-5.1;Hox-4.2 | transcripti | nucleus      | regulation  |
| GI_23397673-S | 242.9  | 284.4  | 254.6  | HOXD9    | <a href="#">NM_014213.2</a> | HOX4;HOX4C;Hox-4.3;Hox-5.2         | RNA         | nucleus      | transcripti |
| GI_23397677-S | 856.6  | 867.8  | 871.7  | STAT6    | <a href="#">NM_003153.3</a> | STAT6B;STAT6C;D12S1644;IL-4-STAT   | transcripti | nucleus      | signal      |
| GI_23397679-S | 104.5  | 126.4  | 106.1  | ZP4      | <a href="#">NM_021186.2</a> | ZBP;ZP1;ZPB                        | molecular   | cellular_co  | biological_ |
| GI_23397686-A | 104.2  | 183    | 200.6  | EMR2     | <a href="#">NM_152918.1</a> |                                    |             |              |             |
| GI_23397697-A | 1733.4 | 2656   | 3904.9 | CPNE1    | <a href="#">NM_152926.1</a> | CPN1;COPN1;MGC1142                 | transporte  |              | vesicle-    |
| GI_23463288-S | 491.8  | 557    | 464.3  | FAM10A5  | <a href="#">NM_153291.1</a> |                                    |             |              |             |
| GI_23463298-S | 553.3  | 576    | 489.6  | FAM10A4  | <a href="#">NM_153290.1</a> |                                    |             |              |             |
| GI_23463320-S | 89.7   | 103.6  | 96     | ANP32E   | <a href="#">NM_030920.2</a> | LANPL;LANP-L;MGC5350               | phosphata   | cytoplasm    |             |
| GI_23463325-S | 107.6  | 118.6  | 105.9  | FLJ25680 | <a href="#">NM_153216.1</a> |                                    | transcripti | nucleus      | regulation  |
| GI_23503232-I | 358.7  | 418.8  | 378.9  | C1QDC1   | <a href="#">NM_032156.1</a> | EEG1;EEG-1;FLJ11391;FLJ22569       |             |              |             |
| GI_23503234-A | 477.7  | 579.1  | 498.5  | C1QDC1   | <a href="#">NM_023925.2</a> | EEG1;EEG-1;FLJ11391;FLJ22569       |             |              |             |
| GI_23503234-I | 90.5   | 94.5   | 88.3   | C1QDC1   | <a href="#">NM_023925.2</a> | EEG1;EEG-1;FLJ11391;FLJ22569       |             |              |             |
| GI_23503240-S | 84.3   | 94.4   | 80.9   | DNAJB8   | <a href="#">NM_153330.1</a> | MGC33884                           | chaperone   |              |             |
| GI_23503242-S | 114.6  | 118.6  | 98.3   | C12orf2  | <a href="#">NM_007211.2</a> | HoJ-1                              |             |              | neuropepti  |
| GI_23503246-S | 2574.6 | 2511.3 | 1934.5 | MGC45400 | <a href="#">NM_153333.1</a> |                                    | DNA         | nucleus      | regulation  |
| GI_23503254-I | 102.5  | 103.6  | 90     | SLIC1    | <a href="#">NM_153337.1</a> | MGC35578                           |             |              |             |
| GI_23503258-S | 371.7  | 304.2  | 264    | FLJ90811 | <a href="#">NM_153339.1</a> |                                    | pseudouri   |              | tRNA        |
| GI_23503260-S | 274.4  | 225.6  | 245.3  | C10orf89 | <a href="#">NM_153336.1</a> | MGC35392                           |             |              |             |
| GI_23503262-S | 289.7  | 345.7  | 265.2  | IBRDC3   | <a href="#">NM_153341.1</a> | FLJ90005                           |             |              |             |
| GI_23503264-S | 128.6  | 136.9  | 140.7  | FLJ90165 | <a href="#">NM_153338.1</a> |                                    | gamma-      |              |             |
| GI_23503270-S | 233.7  | 297.1  | 250.5  | FLJ90586 | <a href="#">NM_153345.1</a> |                                    |             |              |             |
| GI_23503272-S | 491.7  | 407.6  | 457.4  | FLJ90024 | <a href="#">NM_153342.1</a> |                                    |             |              |             |
| GI_23503274-S | 179.5  | 230.1  | 129    | FLJ90119 | <a href="#">NM_153347.1</a> |                                    |             |              |             |
| GI_23503276-S | 189.6  | 224.9  | 244.2  | C6orf141 | <a href="#">NM_153344.1</a> | MGC46457                           | DNA         | nucleus      | regulation  |
| GI_23503282-S | 143.4  | 131.9  | 125.5  | MGC34741 | <a href="#">NM_153356.1</a> |                                    |             |              |             |
| GI_23503286-S | 335.9  | 369.1  | 375    | FLJ90396 | <a href="#">NM_153358.1</a> |                                    | nucleic     | nucleus      | regulation  |
| GI_23503290-S | 368.2  | 798    | 952.8  | FLJ90166 | <a href="#">NM_153360.1</a> |                                    |             |              |             |
| GI_23503292-S | 325.9  | 402.5  | 353.9  | SLC16A11 | <a href="#">NM_153357.1</a> | FLJ90193                           | copper,     |              | superoxid   |
| GI_23503296-S | 126.1  | 151.5  | 157.6  | C6orf158 | <a href="#">NM_153362.1</a> | MGC46520;dJ223E3.1                 | trypsin     |              | proteolysis |
| GI_23503298-S | 427.1  | 441    | 342.1  | MGC24975 | <a href="#">NM_153359.1</a> |                                    |             |              |             |
| GI_23503300-S | 98.3   | 93.8   | 84.9   | MGC39520 | <a href="#">NM_153364.1</a> |                                    |             |              |             |
| GI_23503306-S | 91.6   | 102    | 86.6   | MGC42415 | <a href="#">NM_153363.1</a> |                                    | nucleic     | intracellula | regulation  |
| GI_23503310-S | 148.1  | 148.6  | 114.3  | FLJ90013 | <a href="#">NM_153365.1</a> |                                    |             |              |             |

|               |        |        |        |           |                             |                                    |             |                          |
|---------------|--------|--------|--------|-----------|-----------------------------|------------------------------------|-------------|--------------------------|
| GI_23503312-S | 1084.9 | 733.6  | 362.2  | MGC35274  | <a href="#">NM_153374.1</a> |                                    |             | cell wall                |
| GI_23503314-S | 1103.5 | 1312.9 | 986.4  | FLJ90798  | <a href="#">NM_153367.1</a> |                                    | nucleic     | nucleus electron         |
| GI_23503316-S | 114.4  | 136.9  | 154.8  | FLJ90575  | <a href="#">NM_153376.1</a> |                                    | DNA         | nucleus regulation       |
| GI_23503318-S | 426.2  | 568.4  | 498.9  | PI16      | <a href="#">NM_153370.1</a> | MGC45378;dJ90K10.5                 | peroxidase  | extracellular response   |
| GI_23503320-S | 289.3  | 367.8  | 318.4  | PLAC2     | <a href="#">NM_153375.1</a> | FLJ90734                           |             |                          |
| GI_23503326-A | 209.2  | 254.3  | 189.5  | MLL5      | <a href="#">NM_018682.2</a> | FLJ10078;FLJ14026;HDCMC04P         |             |                          |
| GI_23503334-S | 501.5  | 666.6  | 640.6  | FLJ25952  | <a href="#">NM_153251.1</a> |                                    |             |                          |
| GI_23510242-S | 821.8  | 651.6  | 579    | KIAA1797  | <a href="#">NM_017794.2</a> | FLJ20375                           |             |                          |
| GI_23510282-S | 1462.7 | 1341.8 | 1157.6 | ELP3      | <a href="#">NM_018091.3</a> | FLJ10422                           |             |                          |
| GI_23510284-S | 102.9  | 105.9  | 101.3  | CILP2     | <a href="#">NM_153221.1</a> | CLIP-2;MGC45771                    |             |                          |
| GI_23510288-S | 123.6  | 132.1  | 124.8  | SGPP2     | <a href="#">NM_152386.2</a> | SPP2;FLJ39004                      | hydrolase   | integral to              |
| GI_23510318-S | 103    | 114.4  | 101.6  | NPPA      | <a href="#">NM_006172.1</a> | ANF;ANP;PND;CDD-ANF                | hormone     | extracellular regulation |
| GI_23510324-I | 101.2  | 84.9   | 85.4   | PMCHL2    | <a href="#">NM_031888.1</a> |                                    | molecular   | cellular_co synaptic     |
| GI_23510330-S | 149.1  | 176.9  | 181.7  | XTP1      | <a href="#">NM_018369.1</a> | FLJ11252                           |             | intracellular            |
| GI_23510334-S | 272.7  | 270.7  | 284.2  | IHPK1     | <a href="#">NM_153273.1</a> | IP6K1;MGC9925;KIAA0263             | inositol-   |                          |
| GI_23510339-A | 1194.7 | 2084   | 2003.2 | UBE1      | <a href="#">NM_153280.1</a> | A1S9;A1ST;GXP1;A1S9T;UBE1X;MGC4781 | ubiquitin   | DNA                      |
| GI_23510339-I | 157.7  | 166.2  | 151.5  | UBE1      | <a href="#">NM_153280.1</a> | A1S9;A1ST;GXP1;A1S9T;UBE1X;MGC4781 | ubiquitin   | DNA                      |
| GI_23510343-I | 112.7  | 126.3  | 117.8  | C20orf161 | <a href="#">NM_033421.2</a> | SNX-                               | protein     | intracellular            |
| GI_23510344-I | 380.3  | 446.2  | 281.9  | FYN       | <a href="#">NM_002037.3</a> | SLK;SYN;MGC45350                   | protein-    | learning                 |
| GI_23510345-I | 182    | 203.8  | 186.6  | AD-017    | <a href="#">NM_152932.1</a> | FLJ14611                           |             |                          |
| GI_23510347-S | 111.1  | 112.2  | 113.5  | TTRAP     | <a href="#">NM_016614.2</a> | EAP2;AD022;MGC9099;dJ30M3.3        | transcripti | cell                     |
| GI_23510349-A | 181.2  | 186.7  | 197.5  | C20orf161 | <a href="#">NM_152897.1</a> | SNX-                               | protein     | intracellular            |
| GI_23510351-S | 1115.8 | 874.9  | 1482.7 | AD023     | <a href="#">NM_020679.2</a> | MGC45027                           |             |                          |
| GI_23510353-S | 281.1  | 346.1  | 334.7  | Spc25     | <a href="#">NM_020675.3</a> | AD024;MGC22228                     |             |                          |
| GI_23510354-S | 314.1  | 407.4  | 301.3  | AD031     | <a href="#">NM_032021.2</a> |                                    |             |                          |
| GI_23510355-I | 209.7  | 184    | 171.1  | RIOK1     | <a href="#">NM_031480.2</a> | AD034;FLJ30006;MGC12903;bA288G3.1  | protein-    | protein                  |
| GI_23510357-A | 1769.8 | 1217.8 | 963.2  | RIOK1     | <a href="#">NM_153005.1</a> | AD034;FLJ30006;MGC12903;bA288G3.1  | protein-    | protein                  |
| GI_23510357-I | 102.2  | 107.1  | 105.8  | RIOK1     | <a href="#">NM_153005.1</a> | AD034;FLJ30006;MGC12903;bA288G3.1  | protein-    | protein                  |
| GI_23510361-I | 164.2  | 147.3  | 196    | FYN       | <a href="#">NM_153047.1</a> | SLK;SYN;MGC45350                   | protein-    | learning                 |
| GI_23510363-A | 3356.2 | 3116.9 | 2008.3 | FYN       | <a href="#">NM_153048.1</a> | SLK;SYN;MGC45350                   | protein-    | learning                 |
| GI_23510365-S | 133.8  | 138.7  | 114    | HOXD10    | <a href="#">NM_002148.2</a> | HOX4;HOX4D;HOX4E                   | RNA         | nucleus regulation       |
| GI_23510367-S | 271.6  | 276.3  | 200.5  | HOXD11    | <a href="#">NM_021192.2</a> | HOX4;HOX4F                         | transcripti | nucleus regulation       |
| GI_23510369-S | 103.8  | 94.4   | 91.3   | HOXD12    | <a href="#">NM_021193.2</a> | HOX4H                              | transcripti | nuclear regulation       |
| GI_23510371-S | 93     | 91.4   | 88.7   | HOXD13    | <a href="#">NM_000523.2</a> | SPD;HOX4I                          | DNA         | nucleus regulation       |
| GI_23510372-S | 211.6  | 250.5  | 215.4  | HOXD3     | <a href="#">NM_006898.4</a> | HOX4;HOX4A;Hox-4.1;MGC10470        | transcripti | nucleus embryoge         |
| GI_23510373-S | 504.3  | 420.1  | 356.2  | HOXD8     | <a href="#">NM_019558.2</a> | HOX4;HOX4E;HOX5.4                  | transcripti | nucleus determinat       |
| GI_23510374-A | 262.6  | 397.1  | 255    | ANKRD15   | <a href="#">NM_015158.1</a> | KANK;KIAA0172                      | GTPase      | immune                   |
| GI_23510374-I | 97.7   | 98.3   | 86.5   | ANKRD15   | <a href="#">NM_015158.1</a> | KANK;KIAA0172                      | GTPase      | immune                   |
| GI_23510376-I | 97.4   | 104.8  | 104.3  | ANKRD15   | <a href="#">NM_153186.1</a> | KANK;KIAA0172                      | GTPase      | immune                   |
| GI_23510378-I | 136.6  | 151.6  | 130.5  | TNPO1     | <a href="#">NM_002270.2</a> | MIP;TRN;IPO2;MIP1;KPNB2            | nuclear     | nuclear protein-         |
| GI_23510380-A | 438.2  | 368    | 409.2  | TNPO1     | <a href="#">NM_153188.1</a> | MIP;TRN;IPO2;MIP1;KPNB2            | nuclear     | nuclear protein-         |
| GI_23510380-I | 117    | 127.8  | 126.3  | TNPO1     | <a href="#">NM_153188.1</a> | MIP;TRN;IPO2;MIP1;KPNB2            | nuclear     | nuclear protein-         |
| GI_23510382-I | 181.4  | 209.9  | 175.6  | EZH2      | <a href="#">NM_004456.3</a> | EZH1;ENX-1;MGC9169                 | DNA         | nucleus establish        |
| GI_23510383-A | 364.3  | 311.9  | 279.6  | EZH2      | <a href="#">NM_152998.1</a> | EZH1;ENX-1;MGC9169                 | DNA         | nucleus establish        |

|               |        |        |        |          |                             |                                   |               |             |             |
|---------------|--------|--------|--------|----------|-----------------------------|-----------------------------------|---------------|-------------|-------------|
| GI_23510385-I | 110.5  | 126.6  | 123.4  | MTMR3    | <a href="#">NM_021090.2</a> | ZFYVE10;KIAA0371;FYVE-DSP1        | protein       | membran     | protein     |
| GI_23510388-A | 579.9  | 540.3  | 590.7  | MTMR3    | <a href="#">NM_153051.1</a> | ZFYVE10;KIAA0371;FYVE-DSP1        | protein       | membran     | protein     |
| GI_23510390-I | 127.1  | 136.6  | 128.9  | NEK3     | <a href="#">NM_002498.1</a> | HSPK36;MGC29949                   | cAMP-         | nucleus     | cell cycle  |
| GI_23510392-A | 142    | 150.4  | 137.5  | NEK3     | <a href="#">NM_152720.1</a> | HSPK36;MGC29949                   | cAMP-         | nucleus     | cell cycle  |
| GI_23510392-I | 91     | 96.5   | 97.1   | NEK3     | <a href="#">NM_152720.1</a> | HSPK36;MGC29949                   | cAMP-         | nucleus     | cell cycle  |
| GI_23510394-I | 97.1   | 108.4  | 99.6   | NETO1    | <a href="#">NM_138966.2</a> | BCTL1;BTCL1                       |               |             |             |
| GI_23510397-A | 588.7  | 633.1  | 665.2  | PANK1    | <a href="#">NM_138316.2</a> | PANK;PANK1a;PANK1b;MGC24596       | ATP           |             | coenzyme    |
| GI_23510399-I | 166.1  | 170.7  | 172.6  | PANK1    | <a href="#">NM_148977.1</a> | PANK;PANK1a;PANK1b;MGC24596       | ATP           |             | coenzyme    |
| GI_23510405-A | 202    | 241.6  | 258.1  | POMZP3   | <a href="#">NM_152992.1</a> | POM121;MGC8359;POM-ZP3            |               |             |             |
| GI_23510407-S | 381.1  | 376.9  | 319.4  | SAP18    | <a href="#">NM_005870.3</a> | SAP18p;2HOR0202;MGC27131          | transcripti   | histone     | regulation  |
| GI_23510408-I | 185.1  | 221.2  | 232.1  | SLC22A1  | <a href="#">NM_003057.2</a> | OCT1;HOCT1                        | organic       | membran     | organic     |
| GI_23510409-A | 130.7  | 111.7  | 113.3  | SLC22A1  | <a href="#">NM_153187.1</a> | OCT1;HOCT1                        | organic       | membran     | organic     |
| GI_23510411-A | 621.5  | 648.3  | 538.8  | SLC22A2  | <a href="#">NM_003058.2</a> |                                   | 2-Oct organic | membran     | organic     |
| GI_23510412-S | 165.5  | 179.3  | 178.3  | SNX26    | <a href="#">NM_052948.2</a> | TCGAP;FLJ39019                    |               |             |             |
| GI_23510414-I | 117.3  | 129.1  | 110.3  | SLC22A2  | <a href="#">NM_153191.1</a> |                                   | 2-Oct organic | membran     | organic     |
| GI_23510416-I | 230.4  | 277.4  | 257.6  | SPAM1    | <a href="#">NM_003117.3</a> | HYA1;PH20;HYAL1;HYAL3;PH-         |               | plasma      | binding of  |
| GI_23510417-A | 130.9  | 120.1  | 119.7  | SPAM1    | <a href="#">NM_153189.1</a> | HYA1;PH20;HYAL1;HYAL3;PH-         |               | plasma      | binding of  |
| GI_23510417-I | 80.2   | 81     | 80.2   | SPAM1    | <a href="#">NM_153189.1</a> | HYA1;PH20;HYAL1;HYAL3;PH-         |               | plasma      | binding of  |
| GI_23510430-A | 250.8  | 294.2  | 277.3  | TNFRSF6  | <a href="#">NM_152876.1</a> | FAS;APT1;CD95;APO-1;FASTM         | transmem      | proteoglyc  | anti-       |
| GI_23510432-I | 113.7  | 130.1  | 109.2  | TNFRSF8  | <a href="#">NM_001243.2</a> | CD30;KI-1;D1S166E                 | transmem      | integral to | negative    |
| GI_23510435-S | 101.7  | 110    | 108.7  | TNFRSF7  | <a href="#">NM_001242.3</a> | T14;CD27;S152;Tp55;MGC20393       | transmem      | integral to | apoptosis   |
| GI_23510436-A | 125.2  | 133.2  | 136.3  | TNFRSF8  | <a href="#">NM_152942.1</a> | CD30;KI-1;D1S166E                 | transmem      | integral to | negative    |
| GI_23510438-S | 413.8  | 523.2  | 473.5  | TNFRSF9  | <a href="#">NM_001561.4</a> | ILA;4-1BB;CD137;CDw137;MGC2172    | receptor      | integral to | negative    |
| GI_23510439-S | 105    | 159.8  | 115.8  | TNFSF10  | <a href="#">NM_003810.2</a> | TL2;APO2L;TRAIL;Apo-2L            | receptor      | soluble     | induction   |
| GI_23510440-I | 113.4  | 117.6  | 112.3  | TNFSF12  | <a href="#">NM_153012.1</a> | APO3L;DR3LG;TWEAK;MGC20669        | receptor      | integral to | induction   |
| GI_23510442-A | 265.7  | 294.3  | 169.7  | TNFSF12  | <a href="#">NM_003809.2</a> | APO3L;DR3LG;TWEAK;MGC20669        | receptor      | integral to | induction   |
| GI_23510443-S | 121.9  | 172.1  | 147    | TNFSF13B | <a href="#">NM_006573.3</a> | BAFF;BLYS;TALL1;THANK;ZTNF4;TALL- | receptor      | soluble     | positive    |
| GI_23510444-S | 128.6  | 145.6  | 127.7  | TNFSF15  | <a href="#">NM_005118.2</a> | TL1;TL1A;VEGI                     | receptor      | soluble     | signal      |
| GI_23510446-S | 185.8  | 206.9  | 140.8  | TNFSF4   | <a href="#">NM_003326.2</a> | GP34;OX4OL;TXGP1;CD134L;OX-40L    | receptor      | integral to | positive    |
| GI_23510447-S | 858.1  | 735.8  | 1135.3 | MCM5     | <a href="#">NM_006739.2</a> | CDC46;MGC5315;P1-CDC46            | cell cycle    | nucleus     | DNA         |
| GI_23510449-S | 735.2  | 624    | 591.4  | MPST     | <a href="#">NM_021126.3</a> | MST;TST2;MGC24539                 | thiosulfate   | mitochond   | cyanate     |
| GI_23510450-S | 2264.9 | 2695.9 | 2841.6 | APEH     | <a href="#">NM_001640.3</a> | APH;OPH;ACPH;D3S48E;MGC2178       | acylamino     |             | proteolysis |
| GI_23510452-S | 5732.8 | 6439.4 | 6431   | COTL1    | <a href="#">NM_021149.2</a> | CLP;MGC19733                      | protein       | cytoskelet  | leukotrien  |
| GI_23510453-S | 126.8  | 130.2  | 108    | ZNF157   | <a href="#">NM_003446.2</a> | HZF22                             | transcripti   | nucleus     | negative    |
| GI_23510454-I | 123.7  | 133.8  | 119.3  | ZNF41    | <a href="#">NM_153380.1</a> | MGC8941                           | transcripti   | nucleus     | regulation  |
| GI_23510456-A | 111    | 138.9  | 123.1  | ZNF41    | <a href="#">NM_007130.1</a> | MGC8941                           | transcripti   | nucleus     | regulation  |
| GI_23510456-I | 78.4   | 93.6   | 82.4   | ZNF41    | <a href="#">NM_007130.1</a> | MGC8941                           | transcripti   | nucleus     | regulation  |
| GI_23592219-S | 108.1  | 116.6  | 125.2  | GPR26    | <a href="#">NM_153442.1</a> |                                   | receptor      | integral to | G-protein   |
| GI_23592221-S | 118.8  | 137.4  | 125.5  | JCG3     | <a href="#">NM_153444.1</a> |                                   | olfactory     | integral to | olfaction   |
| GI_23592223-S | 155.7  | 173.8  | 163.9  | GALGT2   | <a href="#">NM_153446.1</a> | Cad;Sda;B4GALT                    | transferas    |             |             |
| GI_23592225-S | 117.5  | 140.3  | 133.3  | KIR3DL3  | <a href="#">NM_153443.1</a> | KIR44;KIRC1;KIR3DL7               | receptor      |             |             |
| GI_23592229-S | 206    | 237.9  | 229    | JCG1     | <a href="#">NM_153445.1</a> |                                   | olfactory     | integral to | olfaction   |
| GI_23592231-S | 840.9  | 826.7  | 740.3  | LCMR1    | <a href="#">NM_153450.1</a> |                                   |               |             |             |
| GI_23592235-S | 171.7  | 194.4  | 172.9  | C21orf86 | <a href="#">NM_153454.1</a> |                                   |               |             |             |

|               |        |        |                  |                             |                            |             |              |              |
|---------------|--------|--------|------------------|-----------------------------|----------------------------|-------------|--------------|--------------|
| GI_23592241-A | 140.3  | 150.1  | 155 VGLL2        | <a href="#">NM_153453.1</a> | VGL2;VITO1                 |             |              |              |
| GI_23592243-S | 109.1  | 117.8  | 127.7 C21orf87   | <a href="#">NM_153455.1</a> |                            |             |              |              |
| GI_23618862-S | 391.5  | 378.4  | 339.6 EILS1      | <a href="#">NM_152793.1</a> | FLJ25903                   |             |              |              |
| GI_23618866-S | 1110.8 | 1069.3 | 1284.5 SFXN1     | <a href="#">NM_022754.3</a> | FLJ12876                   | cation      | mitochond    | cation       |
| GI_23618915-A | 175.5  | 213.9  | 177.5 CSE-C      | <a href="#">NM_018978.1</a> |                            |             |              |              |
| GI_23618915-I | 119.7  | 135.8  | 124.5 CSE-C      | <a href="#">NM_018978.1</a> |                            |             |              |              |
| GI_23618925-S | 319.9  | 175    | 216.4 ZNF559     | <a href="#">NM_032497.1</a> | MGC13105                   | nucleic     | nucleus      | regulation   |
| GI_23680884-S | 760.9  | 878.2  | 1103.3 FLJ20522  | <a href="#">NM_017861.1</a> |                            |             |              |              |
| GI_23821012-S | 771.2  | 650.6  | 621.4 KIAA1285   | <a href="#">NM_015694.1</a> |                            |             |              |              |
| GI_23821014-S | 174.6  | 171.5  | 163.6 RBJ        | <a href="#">NM_016544.1</a> |                            | small       |              | small        |
| GI_23821022-A | 430.2  | 676.7  | 217.9 IL4I1      | <a href="#">NM_152899.1</a> | FIG1                       | amine       |              | electron     |
| GI_23821022-I | 127.3  | 146.1  | 112.6 IL4I1      | <a href="#">NM_152899.1</a> | FIG1                       | amine       |              | electron     |
| GI_23943784-S | 205.9  | 260.8  | 234 SOSTDC1      | <a href="#">NM_015464.1</a> | USAG1;ECTODIN;DKFZp564D206 |             |              |              |
| GI_23943786-S | 131.1  | 154.2  | 136 NCAG1        | <a href="#">NM_032160.1</a> | FLJ11477                   | sulfotransf |              |              |
| GI_23943808-S | 2857.1 | 2654.7 | 3164.6 TLP19     | <a href="#">NM_015913.2</a> | ERP18;ERP19                | electron    | endoplas     | electron     |
| GI_23943811-S | 487.6  | 581.2  | 537.2 CTEN       | <a href="#">NM_032865.3</a> | FLJ14950                   |             |              | intracellula |
| GI_23943813-S | 234.4  | 223    | 221.5 UEV3       | <a href="#">NM_018314.2</a> | ATTP;FLJ11068              |             |              |              |
| GI_23943849-I | 277.8  | 634.3  | 730.3 CAMK1D     | <a href="#">NM_153498.1</a> | CKLiK                      | ATP         |              | protein      |
| GI_23943853-S | 125.6  | 137.1  | 129.2 PGA5       | <a href="#">NM_014224.1</a> |                            | pepsin A    |              | vacuolar     |
| GI_23943855-S | 112.8  | 114    | 107.9 SIGLEC9    | <a href="#">NM_014441.1</a> | OBBP-LIKE                  | serine-     | integral to  | cell         |
| GI_23943857-S | 447.7  | 476.4  | 532.1 SNX8       | <a href="#">NM_013321.1</a> |                            | protein     |              | intracellula |
| GI_23943859-S | 109.7  | 107    | 115 PTDSR        | <a href="#">NM_015167.1</a> | PSR;PTDSR1;KIAA0585        |             |              |              |
| GI_23943865-S | 100.4  | 95.3   | 103 LOC57795     | <a href="#">NM_021165.1</a> | KIAA1747                   |             |              | protein      |
| GI_23943871-S | 793.5  | 991.8  | 923.6 LOC64744   | <a href="#">NM_022733.1</a> |                            | DNA         | nucleus      |              |
| GI_23943877-S | 116.1  | 135.3  | 124.4 DKFZp434D1 | <a href="#">NM_032253.1</a> |                            |             |              |              |
| GI_23943879-S | 204.5  | 256.7  | 229.7 MGC3207    | <a href="#">NM_032285.1</a> |                            | translation | eukaryotic   | translation  |
| GI_23943883-S | 2554.5 | 1758.2 | 1502.5 MGC5309   | <a href="#">NM_032286.1</a> |                            |             |              |              |
| GI_23943885-S | 141.5  | 173.3  | 143.7 OTEX       | <a href="#">NM_139282.1</a> | PEPP1;PEPP2                | transcripti | nucleus      | regulation   |
| GI_23943891-S | 181.8  | 200.3  | 174.2 ORAOV1     | <a href="#">NM_153451.1</a> | TAOS1                      |             |              |              |
| GI_23943903-S | 129.6  | 136.2  | 132.7 CIDE-3     | <a href="#">NM_022094.2</a> | FLJ20871                   | apoptosis   | intracellula | apoptosis    |
| GI_23943905-S | 111.8  | 118    | 115 THH          | <a href="#">NM_007113.1</a> | THL                        | calcium     | intermedia   | cytoskelet   |
| GI_23943911-S | 422.9  | 548.5  | 488.3 PIK3R4     | <a href="#">NM_014602.1</a> | P150;VPS15                 | enzyme      | cellular_co  | nonselecti   |
| GI_23943913-S | 395.3  | 458.3  | 352.3 ZRANB1     | <a href="#">NM_017580.1</a> | TRABID                     |             |              |              |
| GI_23943919-S | 113    | 259.6  | 527.6 PLA2G4A    | <a href="#">NM_024420.1</a> | PLA2G4;cPLA2-alpha         | calcium-    | cytoplasmic  | icosanoid    |
| GI_23943927-S | 89.3   | 94.9   | 91.5 C20orf96    | <a href="#">NM_153269.1</a> | FLJ40075;dJ1103G7.2        |             | kinesin      |              |
| GI_23957679-S | 84.9   | 81.9   | 82.1 Rgr         | <a href="#">NM_153615.1</a> |                            | guanyl-     |              | intracellula |
| GI_23957681-S | 108.7  | 112.4  | 105.4 HS3ST5     | <a href="#">NM_153612.1</a> | 3-OST-5;HS3OST5            | sulfotransf | integral to  | heparan      |
| GI_23957689-S | 162.3  | 166.7  | 174.4 COG7       | <a href="#">NM_153603.1</a> |                            | protein     | membran      | intracellula |
| GI_23957691-S | 187    | 194.8  | 184.9 MYOCD      | <a href="#">NM_153604.1</a> | MYCD                       | DNA         | nucleus      | regulation   |
| GI_23957695-S | 104.1  | 109.6  | 109.9 FLJ32796   | <a href="#">NM_153606.1</a> |                            |             |              |              |
| GI_23957697-S | 272.6  | 253.8  | 346 LOC153222    | <a href="#">NM_153607.1</a> |                            | DNA         | nucleus      | regulation   |
| GI_23957699-S | 97.8   | 103.1  | 95.2 MGC17986    | <a href="#">NM_153608.1</a> |                            | nucleic     | intracellula | regulation   |
| GI_23957701-I | 91.3   | 106.7  | 104.9 TMPRSS6    | <a href="#">NM_153609.1</a> | FLJ30744                   | trypsin     | integral to  | proteolysis  |
| GI_23957707-S | 1370.8 | 987.1  | 900.2 LOC254531  | <a href="#">NM_153613.1</a> | FLJ10257                   |             |              |              |

|               |        |        |        |          |                             |                                         |             |              |              |
|---------------|--------|--------|--------|----------|-----------------------------|-----------------------------------------|-------------|--------------|--------------|
| GI_24041011-I | 125.6  | 135.8  | 125.7  | KREMEN1  | <a href="#">NM_032045.3</a> | KRM1;KREMEN;FLJ31863                    | molecular   | integral to  | cell         |
| GI_24041013-A | 113.8  | 118.9  | 105.9  | KREMEN1  | <a href="#">NM_153379.1</a> | KRM1;KREMEN;FLJ31863                    | molecular   | integral to  | cell         |
| GI_24041013-I | 104    | 128.3  | 105.3  | KREMEN1  | <a href="#">NM_153379.1</a> | KRM1;KREMEN;FLJ31863                    | molecular   | integral to  | cell         |
| GI_24041015-A | 3570.5 | 3276.4 | 3365.7 | UXT      | <a href="#">NM_004182.2</a> | ART-27                                  |             |              |              |
| GI_24041017-I | 124.3  | 152.1  | 150.5  | UXT      | <a href="#">NM_153477.1</a> | ART-27                                  |             |              |              |
| GI_24041019-A | 998.5  | 894.2  | 774.9  | EED      | <a href="#">NM_003797.2</a> | HEED;WAIT1                              | transcripti | nucleus      | negative     |
| GI_24041022-I | 106.3  | 130.7  | 104.4  | EED      | <a href="#">NM_152991.1</a> | HEED;WAIT1                              | transcripti | nucleus      | negative     |
| GI_24041025-S | 1123.7 | 1448.3 | 1927.9 | NETO2    | <a href="#">NM_018092.3</a> | NEOT2;FLJ10430;FLJ14724;FLJ90456        |             |              |              |
| GI_24041028-I | 236.5  | 284.2  | 252.6  | NOS2A    | <a href="#">NM_000625.3</a> | NOS;INOS;NOS2;HEP-NOS                   | nitric-     | cytoplasm    | nitric oxide |
| GI_24041031-A | 85     | 85.4   | 86.5   | NOS2A    | <a href="#">NM_153292.1</a> | NOS;INOS;NOS2;HEP-NOS                   | nitric-     | cytoplasm    | nitric oxide |
| GI_24041034-S | 368.5  | 421.4  | 437    | NOTCH2   | <a href="#">NM_024408.2</a> | hN2                                     |             |              |              |
| GI_24041037-I | 135.2  | 134.8  | 142.3  | ADAM33   | <a href="#">NM_025220.2</a> | FLJ35308;FLJ36751;DJ964F7.1;DKFZp434K   |             |              |              |
| GI_24041039-A | 320.6  | 369.8  | 354.3  | ADAM33   | <a href="#">NM_153202.1</a> | FLJ35308;FLJ36751;DJ964F7.1;DKFZp434K   |             |              |              |
| GI_24111254-S | 102.8  | 119.2  | 94.9   | CPA6     | <a href="#">NM_020361.2</a> | CPAH                                    |             |              |              |
| GI_24119161-S | 327.3  | 345.5  | 198.8  | TNFSF7   | <a href="#">NM_001252.2</a> | CD70;CD27L;CD27LG                       | receptor    | integral to  | signal       |
| GI_24119162-S | 111.8  | 120.5  | 116.3  | TNFSF8   | <a href="#">NM_001244.2</a> | CD153;CD30L;CD30LG                      | receptor    | integral to  | induction    |
| GI_24119163-S | 458.6  | 512.3  | 398.3  | TNFSF9   | <a href="#">NM_003811.2</a> | 4-1BB-L                                 | receptor    | integral to  | signal       |
| GI_24119165-I | 114.8  | 120    | 92.8   | RBBP9    | <a href="#">NM_006606.2</a> | BOG;RBBP10;MGC9236                      |             | nucleus      | oncogene     |
| GI_24119167-A | 498.2  | 579.1  | 407.8  | RBBP9    | <a href="#">NM_153328.1</a> | BOG;RBBP10;MGC9236                      |             | nucleus      | oncogene     |
| GI_24119273-S | 106.8  | 118.2  | 126.2  | VGCNL1   | <a href="#">NM_052867.1</a> | ba430M15.1                              |             |              |              |
| GI_24119276-I | 99.9   | 100.8  | 86.4   | MGC15875 | <a href="#">NM_153373.1</a> | MGC45484                                |             |              |              |
| GI_24119284-S | 97.9   | 90.3   | 95.9   | MGC34007 | <a href="#">NM_153205.1</a> |                                         |             |              |              |
| GI_24158475-S | 118.3  | 121.5  | 108.2  | KIAA1919 | <a href="#">NM_153369.1</a> | NaGLT1;MGC33953                         |             |              |              |
| GI_24158495-S | 155    | 115.7  | 121.4  | GIOT-1   | <a href="#">NM_153257.1</a> | MGC33911                                | DNA         | nucleus      | regulation   |
| GI_24211014-A | 221.2  | 253.6  | 251.6  | FLJ10661 | <a href="#">NM_152563.1</a> | MGC45068                                |             |              |              |
| GI_24211016-A | 79.6   | 84.1   | 80.4   | HSFY     | <a href="#">NM_152584.1</a> | HSF2L                                   | transcripti | nucleus      | regulation   |
| GI_24211016-I | 79.2   | 89     | 83.4   | HSFY     | <a href="#">NM_152584.1</a> | HSF2L                                   | transcripti | nucleus      | regulation   |
| GI_24211028-S | 674.8  | 689.8  | 781.5  | ASPM     | <a href="#">NM_018136.2</a> | MCPH5;FLJ10517;FLJ10549                 |             |              |              |
| GI_24233516-S | 377.4  | 481.3  | 427.2  | FLJ31051 | <a href="#">NM_153687.1</a> |                                         |             |              |              |
| GI_24233529-S | 896.7  | 1111.4 | 930    | LOC91526 | <a href="#">NM_153697.1</a> |                                         |             |              |              |
| GI_24233531-S | 142    | 149.7  | 146    | ZFP1     | <a href="#">NM_153688.1</a> | ZNF475;FLJ34243                         |             | nucleus      |              |
| GI_24233571-S | 114.4  | 142    | 115.1  | ZNF367   | <a href="#">NM_153695.1</a> | FLJ33970                                |             |              |              |
| GI_24233573-S | 123.7  | 145.8  | 139.8  | DEFB125  | <a href="#">NM_153325.1</a> | DEFB-25                                 |             |              | xenobiotic   |
| GI_24234682-S | 496.7  | 510.1  | 518    | USP11    | <a href="#">NM_004651.2</a> | UHX1                                    | ubiquitin-  | nucleus      | deubiquiti   |
| GI_24234684-I | 6078.4 | 8810.2 | 10602  | HSPA8    | <a href="#">NM_006597.3</a> | LAP1;HSC54;HSC70;HSC71;HSP71;HSP73; ATP |             | intracellula | protein      |
| GI_24234685-A | 5744.1 | 9691.8 | 12131  | HSPA8    | <a href="#">NM_153201.1</a> | LAP1;HSC54;HSC70;HSC71;HSP71;HSP73; ATP |             | intracellula | protein      |
| GI_24234689-A | 98.9   | 90.2   | 96.3   | MRE11A   | <a href="#">NM_005590.2</a> | ATLD;HNCS1;MRE11;MRE11B                 | single-     | nucleoplas   | regulation   |
| GI_24234689-I | 108.1  | 105.5  | 113.4  | MRE11A   | <a href="#">NM_005590.2</a> | ATLD;HNCS1;MRE11;MRE11B                 | single-     | nucleoplas   | regulation   |
| GI_24234691-I | 376.8  | 377.6  | 422    | MRE11A   | <a href="#">NM_005591.2</a> | ATLD;HNCS1;MRE11;MRE11B                 | single-     | nucleoplas   | regulation   |
| GI_24234693-A | 174.6  | 214.7  | 191    | KRT13    | <a href="#">NM_002274.2</a> | K13;CK13;MGC3781                        | structural  | intermedia   | epidermal    |
| GI_24234701-S | 170.8  | 174.5  | 170.8  | PITX1    | <a href="#">NM_002653.3</a> | BFT;POTX;PTX1                           | transcripti | nucleus      | skeletal     |
| GI_24234707-I | 84.8   | 96.4   | 81.3   | PITX2    | <a href="#">NM_153426.1</a> | RS;RGS;ARP1;Brx1;IDG2;IGDS;IHG2;PTX2;   | transcripti | nucleus      | determinat   |
| GI_24234710-A | 170.9  | 181.1  | 178.9  | PITX2    | <a href="#">NM_153427.1</a> | RS;RGS;ARP1;Brx1;IDG2;IGDS;IHG2;PTX2;   | transcripti | nucleus      | determinat   |
| GI_24234713-S | 161    | 177.4  | 168.5  | PITX3    | <a href="#">NM_005029.3</a> | PTX3;MGC12766                           | transcripti | nucleus      | histogene    |

|               |        |        |        |            |                             |                                    |             |             |             |
|---------------|--------|--------|--------|------------|-----------------------------|------------------------------------|-------------|-------------|-------------|
| GI_24234714-S | 202.1  | 229.1  | 206.6  | KLK4       | <a href="#">NM_004917.2</a> | ARM1;EMSP;PSTS;EMSP1;KLK-L1;PRSS17 | serine-     | extracellul |             |
| GI_24234719-A | 2471   | 2967.1 | 2676.9 | DNAJB6     | <a href="#">NM_005494.2</a> | MRJ;HHDJ1;HSJ-2;MSJ-               | heat        | cellular_co | biological_ |
| GI_24234719-I | 5683.1 | 5823.1 | 6297.6 | DNAJB6     | <a href="#">NM_005494.2</a> | MRJ;HHDJ1;HSJ-2;MSJ-               | heat        | cellular_co | biological_ |
| GI_24234721-S | 127.9  | 146.4  | 138.5  | DNAJC3     | <a href="#">NM_006260.2</a> | P58;HP58;PRKRI;P58IPK;P58IPK HP58  | protein     | cytoplasm   | regulation  |
| GI_24234723-A | 679.6  | 717.6  | 1213.4 | TRADD      | <a href="#">NM_003789.2</a> | Hs.89862;MGC11078                  |             |             | induction   |
| GI_24234723-I | 124.2  | 172.3  | 173.4  | TRADD      | <a href="#">NM_003789.2</a> | Hs.89862;MGC11078                  |             |             | induction   |
| GI_24234725-I | 94     | 102.4  | 81.9   | TRADD      | <a href="#">NM_153425.1</a> | Hs.89862;MGC11078                  |             |             | induction   |
| GI_24234731-A | 106.2  | 108    | 102.4  | SEMA6D     | <a href="#">NM_024966.2</a> | FLJ11598;KIAA1479                  |             |             |             |
| GI_24234731-I | 94.1   | 93.5   | 97.5   | SEMA6D     | <a href="#">NM_024966.2</a> | FLJ11598;KIAA1479                  |             |             |             |
| GI_24234740-I | 86.9   | 90.2   | 76.3   | SEMA6D     | <a href="#">NM_153618.1</a> | FLJ11598;KIAA1479                  |             |             |             |
| GI_24234746-S | 3342.2 | 4116   | 3858.2 | ILF2       | <a href="#">NM_004515.2</a> | NF45;MGC8391                       | RNA         | nucleus     | immune      |
| GI_24234749-I | 904.7  | 966.3  | 836.2  | ILF3       | <a href="#">NM_012218.2</a> | MMP4;MPP4;NF90;NFAR;TCP80;DRBP76;N | RNA         | nucleus     |             |
| GI_24234752-I | 534    | 656.4  | 668.7  | ILF3       | <a href="#">NM_004516.2</a> | MMP4;MPP4;NF90;NFAR;TCP80;DRBP76;N | RNA         | nucleus     |             |
| GI_24234755-A | 603.3  | 720.9  | 669.5  | ILF3       | <a href="#">NM_153464.1</a> | MMP4;MPP4;NF90;NFAR;TCP80;DRBP76;N | RNA         | nucleus     |             |
| GI_24234758-S | 122.9  | 125.6  | 121.6  | CFC1       | <a href="#">NM_032545.2</a> | HTX2;CRYPTIC                       | molecular   | cellular_co | determinat  |
| GI_24234759-I | 289.3  | 266.6  | 214.4  | CSAGE      | <a href="#">NM_153478.1</a> | CSAG1                              |             |             |             |
| GI_24234762-A | 2620.3 | 2751.3 | 2293.4 | CSAGE      | <a href="#">NM_153479.1</a> | CSAG1                              |             |             |             |
| GI_24307870-S | 2238   | 2165   | 3071.4 | MGC31963   | <a href="#">NM_144580.1</a> |                                    |             |             |             |
| GI_24307874-S | 252.8  | 317.1  | 285.9  | ZNF11B     | <a href="#">NM_006955.1</a> | KOX2                               |             |             |             |
| GI_24307876-S | 205.7  | 225.8  | 261.6  | POR        | <a href="#">NM_000941.1</a> | CYPOR                              | NADPH-      | membran     | electron    |
| GI_24307878-S | 1290.2 | 1412.1 | 1260.7 | DNCI2      | <a href="#">NM_001378.1</a> | IC2                                | microtubul  | cytoplasm   | microtubul  |
| GI_24307882-S | 587.5  | 491.7  | 393.6  | ETV4       | <a href="#">NM_001986.1</a> | E1A-F;PEAS3                        | RNA         | nucleus     | viral       |
| GI_24307886-S | 102.7  | 109.7  | 120.9  | ONECUT1    | <a href="#">NM_004498.1</a> | HNF6;HNF-6;HNF6A                   | transcripti | nucleus     | regulation  |
| GI_24307888-S | 1104.2 | 1241.6 | 1017.5 | USP10      | <a href="#">NM_005153.1</a> | UBPO;KIAA0190                      | peptidase   |             | deubiquiti  |
| GI_24307898-S | 376.6  | 411.3  | 403.6  | ERAL1      | <a href="#">NM_005702.1</a> | ERA;ERAL1A;HERA-A;HERA-B           |             |             |             |
| GI_24307902-S | 135.5  | 144.8  | 219.5  | CORO2B     | <a href="#">NM_006091.1</a> | CLIPINC;KIAA0925                   | membran     | kinesin     | actin       |
| GI_24307904-S | 88.4   | 139.2  | 137.5  | SPON1      | <a href="#">NM_006108.1</a> | KIAA0762;MGC10724;f-spondin        |             | extracellul |             |
| GI_24307908-S | 184.8  | 216.8  | 225.3  | RALGDS     | <a href="#">NM_006266.1</a> | RGF;RalGEF                         | Ral guanyl- |             | RAS         |
| GI_24307912-S | 215.2  | 247    | 214.6  | ZNF234     | <a href="#">NM_006630.1</a> | HZF4;ZNF269                        | DNA         | nucleus     | developm    |
| GI_24307916-S | 1056.2 | 1240.6 | 1221.7 | HELIC1     | <a href="#">NM_006828.1</a> | RNAH;ASC1p200;dJ121G13.4           | nucleic     | nucleus     |             |
| GI_24307918-S | 1091.4 | 1047   | 1162.1 | RY1        | <a href="#">NM_006857.1</a> |                                    | DNA         | cellular_co | biological_ |
| GI_24307920-S | 144.2  | 155.1  | 182.8  | ATE1       | <a href="#">NM_007041.1</a> |                                    | acyltransf  | cytoplasm   | protein     |
| GI_24307922-S | 546.5  | 638.9  | 449.7  | RPE        | <a href="#">NM_006916.1</a> | MGC2636                            | ribulose-   |             | carbohydr   |
| GI_24307924-S | 292    | 380    | 322.1  | ZNF32      | <a href="#">NM_006973.1</a> | KOX30                              |             |             |             |
| GI_24307928-S | 372.7  | 320.8  | 377.6  | OIP5       | <a href="#">NM_007280.1</a> |                                    | protein     | cellular_co | cell        |
| GI_24307932-S | 181.1  | 238.9  | 217.6  | TFEB       | <a href="#">NM_007162.1</a> | TCFEB                              | transcripti | transcripti | humoral     |
| GI_24307934-S | 252.6  | 303.9  | 248.2  | ZNF184     | <a href="#">NM_007149.1</a> |                                    | zinc ion    | nucleus     | regulation  |
| GI_24307936-S | 381.7  | 354.3  | 311.8  | ZNF79      | <a href="#">NM_007135.1</a> | pT7                                | DNA         | nucleus     | regulation  |
| GI_24307942-S | 3684.5 | 3928.6 | 3765.3 | SCAP       | <a href="#">NM_012235.1</a> | KIAA0199                           | chaperone   | Golgi       | cholester   |
| GI_24307946-S | 345.3  | 284.8  | 338.2  | HABP4      | <a href="#">NM_014282.1</a> | IHABP4;Ki-1/57                     | DNA         | nucleus     | regulation  |
| GI_24307948-S | 331.9  | 380.2  | 385.4  | NCDN       | <a href="#">NM_014284.1</a> | KIAA0607                           |             |             |             |
| GI_24307950-S | 430.2  | 438.7  | 420.1  | PCTAIRE2BF | <a href="#">NM_014290.1</a> |                                    | nucleic     |             |             |
| GI_24307952-S | 3096.4 | 2863.3 | 2730.5 | NIFU       | <a href="#">NM_014301.1</a> |                                    |             |             |             |
| GI_24307954-S | 511.6  | 487.8  | 384.2  | CYFIP2     | <a href="#">NM_014376.1</a> | PIR121;PRO1331                     |             |             |             |

|               |        |        |        |            |                             |                                     |             |              |             |
|---------------|--------|--------|--------|------------|-----------------------------|-------------------------------------|-------------|--------------|-------------|
| GI_24307956-S | 292.1  | 358.7  | 325.3  | PIB5PA     | <a href="#">NM_014422.1</a> | PIPP;INPP5                          | inositol/ph |              |             |
| GI_24307958-S | 118.5  | 123.5  | 129.2  | PIPPIN     | <a href="#">NM_014460.1</a> | dJ347H13.2                          |             |              |             |
| GI_24307960-S | 1590.5 | 1412.5 | 1763.6 | KIAA0406   | <a href="#">NM_014657.1</a> |                                     |             |              |             |
| GI_24307962-S | 249.6  | 305.8  | 192.6  | ZDHHC1     | <a href="#">NM_013304.1</a> | ZNF377;C16orf1;HSU90653             | DNA         | integral to  | regulation  |
| GI_24307966-S | 168.9  | 294.8  | 202.4  | SRGAP2     | <a href="#">NM_014850.1</a> | WRP;MEGAP;SRGAP3;ARHGAP14;KIAA04    |             |              |             |
| GI_24307968-S | 2542.6 | 2728.8 | 1820.6 | CYFIP1     | <a href="#">NM_014608.1</a> | SHYC;KIAA0068;P140SRA-1             |             |              |             |
| GI_24307970-S | 254.6  | 293.1  | 211.9  | STK38L     | <a href="#">NM_015000.1</a> | KIAA0965                            | protein-    |              | protein     |
| GI_24307972-S | 1643.2 | 1590.2 | 1606.9 | ch-TOG     | <a href="#">NM_014756.1</a> | KIAA0097                            | molecular   | cellular_co  | biological_ |
| GI_24307976-S | 103.2  | 105.2  | 92.4   | RIMS1      | <a href="#">NM_014989.1</a> | RIM;RIM1;RAB3IP2;KIAA0340           | protein     |              | vision      |
| GI_24307982-S | 786.7  | 781.2  | 828.3  | KIAA0082   | <a href="#">NM_015050.1</a> |                                     | nucleic     | intracellula |             |
| GI_24307986-S | 158.2  | 174.5  | 167.8  | JMJD2C     | <a href="#">NM_015061.1</a> | GASC1;KIAA0780                      |             |              |             |
| GI_24307990-S | 347.7  | 358.2  | 277.5  | PARC       | <a href="#">NM_015089.1</a> | H7AP1;KIAA0708                      | ligase      |              | electron    |
| GI_24307992-S | 99.8   | 89.8   | 86.9   | NEDL1      | <a href="#">NM_015052.1</a> | KIAA0322                            | ubiquitin-  | intracellula | protein     |
| GI_24307994-S | 195    | 221.3  | 203.2  | SRISNF2L   | <a href="#">NM_015106.1</a> | KIAA0809                            | ATP         |              |             |
| GI_24308002-S | 101.6  | 106.6  | 86.4   | C21orf106  | <a href="#">NM_015151.1</a> | DIP2;KIAA0184                       |             |              |             |
| GI_24308006-S | 2161.2 | 2385.6 | 2658   | ARL6IP     | <a href="#">NM_015161.1</a> | AIP1;ARMER;ARL6IP1;KIAA0069         |             | integral to  |             |
| GI_24308008-S | 1311.1 | 1164.5 | 939.8  | METAP1     | <a href="#">NM_015143.1</a> | KIAA0094                            | methionyl   |              | proteolysis |
| GI_24308012-S | 1262.3 | 1413.1 | 1227.4 | PMPCA      | <a href="#">NM_015160.1</a> | KIAA0123;Alpha-MPP                  | protein     | mitochond    | proteolysis |
| GI_24308016-S | 898    | 942.1  | 868    | TBC1D1     | <a href="#">NM_015173.1</a> | TBC;TBC1;KIAA1108                   |             |              |             |
| GI_24308026-S | 120.7  | 128.4  | 115.4  | KIAA1043   | <a href="#">NM_015281.1</a> |                                     |             |              |             |
| GI_24308028-S | 867    | 550.8  | 415.7  | DOCK9      | <a href="#">NM_015296.1</a> | ZIZ1;KIAA1058;zizimin1              | guanyl-     | kinesin      | biological_ |
| GI_24308032-S | 1120.1 | 1189.1 | 1167.7 | FNBP4      | <a href="#">NM_015308.1</a> | FBP30;KIAA1014                      |             |              |             |
| GI_24308034-S | 1691.7 | 1712.9 | 1765.9 | EXOC7      | <a href="#">NM_015219.1</a> | EXO70;Exo70p;YJL085W;KIAA1067       |             |              |             |
| GI_24308040-S | 408.3  | 310.4  | 369.1  | EST1B      | <a href="#">NM_015327.1</a> | SMG-5;KIAA1089                      |             |              |             |
| GI_24308042-S | 195.8  | 217.3  | 192.1  | KIAA0828   | <a href="#">NM_015328.1</a> |                                     | adenosylh   |              | one-        |
| GI_24308048-S | 466.8  | 391.8  | 377.3  | KIAA0073   | <a href="#">NM_015342.1</a> |                                     | cyclophilin |              | protein     |
| GI_24308052-S | 1030.5 | 1091.2 | 951.6  | SUMF2      | <a href="#">NM_015411.1</a> | DKFZp66I1024                        | molecular   | endoplas     |             |
| GI_24308054-S | 1262.9 | 1304.4 | 1114.8 | DKFZP434F2 | <a href="#">NM_015412.1</a> |                                     |             |              |             |
| GI_24308056-S | 117    | 134.5  | 133.4  | DKFZP586H2 | <a href="#">NM_015430.1</a> |                                     | trypsin     |              | proteolysis |
| GI_24308058-S | 1412.5 | 988.1  | 776.3  | DKFZP586DC | <a href="#">NM_015433.1</a> |                                     |             |              |             |
| GI_24308060-S | 288.1  | 240.1  | 193.8  | ZNF363     | <a href="#">NM_015436.1</a> | ARNIP;CHIMP;PIRH2;hARNIP;PRO1996;DK |             |              |             |
| GI_24308064-S | 177.7  | 205.1  | 184.6  | LOC126147  | <a href="#">NM_145807.1</a> |                                     | structural  |              |             |
| GI_24308068-S | 801.7  | 685.9  | 967.1  | EHZF       | <a href="#">NM_015461.1</a> | DKFZp564D0764                       | electron    |              | electron    |
| GI_24308070-S | 375.1  | 275.9  | 179.7  | DKFZP566K1 | <a href="#">NM_015463.1</a> |                                     |             |              |             |
| GI_24308072-S | 2245.9 | 1771.1 | 1864.1 | PTPN23     | <a href="#">NM_015466.1</a> | HDPTP;HD-PTP;KIAA1471;DKFZP564F0923 | protein     |              | signal      |
| GI_24308074-S | 474    | 474.4  | 469.4  | GAF1       | <a href="#">NM_015470.1</a> | pp75;RIP11;KIAA0857;DKFZP434H018    |             |              |             |
| GI_24308076-S | 664.9  | 1028.7 | 874.1  | C18orf10   | <a href="#">NM_015476.1</a> | HsT3006;DKFZP586M1523               |             |              |             |
| GI_24308078-S | 422.3  | 513.9  | 477    | ZNF385     | <a href="#">NM_015481.1</a> | HZF;ZFP385;DKFZP586G1122            |             |              |             |
| GI_24308080-S | 352.2  | 428.4  | 331.1  | SH2B       | <a href="#">NM_015503.1</a> | SH2-B;DKFZP547G1110                 | JAK         |              |             |
| GI_24308084-S | 125.5  | 345.4  | 326    | MOXD1      | <a href="#">NM_015529.1</a> | MOX;dJ248E1.1;DKFZP564G202          | copper ion  |              | catechola   |
| GI_24308086-S | 797.2  | 953.3  | 199    | LRIG1      | <a href="#">NM_015541.1</a> | LIG1;LIG-1;DKFZP586O1624            |             |              |             |
| GI_24308088-S | 128    | 121.2  | 114.5  | CHD5       | <a href="#">NM_015557.1</a> | KIAA0444;DKFZp434N231               |             |              |             |
| GI_24308092-S | 2184   | 1929.3 | 1654.9 | C19orf13   | <a href="#">NM_015578.1</a> | DKFZP434D1335                       | DNA         | nucleus      | regulation  |
| GI_24308106-S | 1091.3 | 1146.2 | 848.3  | DKFZp566C0 | <a href="#">NM_015609.1</a> |                                     |             |              |             |



|               |        |        |        |            |                             |                                   |                    |                         |
|---------------|--------|--------|--------|------------|-----------------------------|-----------------------------------|--------------------|-------------------------|
| GI_24308108-S | 400.8  | 465.8  | 387.4  | DKFZP564D1 | <a href="#">NM_015631.1</a> |                                   |                    |                         |
| GI_24308110-S | 203.5  | 202.3  | 188.2  | DKFZp564O1 | <a href="#">NM_015633.1</a> | HSPC123-like                      |                    |                         |
| GI_24308112-S | 549.6  | 649.4  | 751    | KIAA1279   | <a href="#">NM_015634.1</a> | DKFZP586B0923                     |                    |                         |
| GI_24308114-S | 139.1  | 168.8  | 163.6  | IRF2BP1    | <a href="#">NM_015649.1</a> | DKFZP434M154                      |                    |                         |
| GI_24308118-S | 110.2  | 120.9  | 89.2   | DKFZP434I0 | <a href="#">NM_015668.1</a> |                                   |                    |                         |
| GI_24308126-S | 1926.4 | 2166.7 | 1980.1 | ERdj5      | <a href="#">NM_018981.1</a> | JPDI;DKFZp434J1813                |                    |                         |
| GI_24308130-S | 627.1  | 755.1  | 523.1  | KIAA1128   | <a href="#">NM_018999.1</a> |                                   | exo-alpha- membran | carbohydr               |
| GI_24308132-S | 3002.6 | 3767.7 | 3233   | LOC54499   | <a href="#">NM_019026.1</a> |                                   |                    |                         |
| GI_24308140-S | 114.2  | 128.9  | 111.3  | SGTB       | <a href="#">NM_019072.1</a> | SGT2                              |                    |                         |
| GI_24308146-S | 228.5  | 165.9  | 117.1  | IL17RD     | <a href="#">NM_017563.1</a> | SEF;IL-                           |                    |                         |
| GI_24308152-S | 160.5  | 159    | 146.6  | FLJ20400   | <a href="#">NM_017804.1</a> |                                   |                    |                         |
| GI_24308154-S | 1474.3 | 1607.1 | 775.7  | UACA       | <a href="#">NM_018003.1</a> | FLJ10128;KIAA1561                 | molecular          | extracellul biological_ |
| GI_24308156-S | 268.9  | 393.5  | 193.5  | GBP3       | <a href="#">NM_018284.1</a> | FLJ10961                          |                    |                         |
| GI_24308160-S | 261.8  | 210.8  | 234.1  | SLC22A15   | <a href="#">NM_018420.1</a> | FLIPT1;DKFZp761G0313              | transporte         | integral to transport   |
| GI_24308162-S | 1029.5 | 1098.6 | 1230.9 | FEM1A      | <a href="#">NM_018708.1</a> | DKFZp762M136                      |                    |                         |
| GI_24308164-S | 535    | 433.1  | 495.8  | DKFZp762O0 | <a href="#">NM_018710.1</a> |                                   |                    |                         |
| GI_24308166-S | 105    | 115.7  | 89.6   | DKFZp761H0 | <a href="#">NM_018711.1</a> |                                   | ion                | integral to ion         |
| GI_24308168-S | 108.9  | 114.7  | 101.7  | DNAH3      | <a href="#">NM_017539.1</a> | DLP3;DNAHC3B;Hsadhc3;DKFZp434N074 | nucleotide         | dynein microtubul       |
| GI_24308174-S | 2052.4 | 1745   | 1737.8 | FLJ20719   | <a href="#">NM_017940.1</a> | KIAA1693                          |                    |                         |
| GI_24308176-S | 635.4  | 722.1  | 650.2  | FLJ10006   | <a href="#">NM_017969.1</a> |                                   |                    |                         |
| GI_24308178-S | 350.2  | 472.2  | 341.6  | DKFZp547A0 | <a href="#">NM_018704.1</a> |                                   |                    |                         |
| GI_24308180-S | 1333.4 | 1438.9 | 1540.9 | KIAA1354   | <a href="#">NM_018847.1</a> | FLJ13568                          | protein            |                         |
| GI_24308184-S | 846.6  | 925.3  | 906.2  | LOC56926   | <a href="#">NM_020170.1</a> |                                   | peptidase          | proteolysis             |
| GI_24308186-S | 434.6  | 323.9  | 360.2  | LOC56931   | <a href="#">NM_020175.1</a> |                                   |                    |                         |
| GI_24308188-S | 92.2   | 100.1  | 89.1   | RGMA       | <a href="#">NM_020211.1</a> | RGM                               |                    |                         |
| GI_24308194-S | 950.9  | 1122.6 | 1153.9 | VAR2L      | <a href="#">NM_020442.1</a> |                                   |                    |                         |
| GI_24308198-S | 117.8  | 111.4  | 116.8  | KIAA1181   | <a href="#">NM_020462.1</a> |                                   |                    |                         |
| GI_24308206-S | 5199   | 5173.5 | 4827.3 | KIAA1185   | <a href="#">NM_020710.1</a> |                                   |                    |                         |
| GI_24308210-S | 147.9  | 157.3  | 162    | KIAA1287   | <a href="#">NM_020748.1</a> |                                   |                    |                         |
| GI_24308214-S | 255.3  | 288.8  | 260.7  | KIAA1318   | <a href="#">NM_020769.1</a> |                                   |                    |                         |
| GI_24308216-S | 362.4  | 406.4  | 368    | MIDORI     | <a href="#">NM_020778.1</a> | KIAA1330                          | ATP                | protein                 |
| GI_24308222-S | 174.8  | 187.6  | 189.5  | KIAA1407   | <a href="#">NM_020817.1</a> |                                   |                    |                         |
| GI_24308226-S | 216.1  | 237.9  | 247.4  | KIAA1441   | <a href="#">NM_020832.1</a> |                                   |                    |                         |
| GI_24308228-S | 121.7  | 124.6  | 119.3  | PACSIN1    | <a href="#">NM_020804.1</a> | KIAA1379                          | protein            | kinesin endocytosi      |
| GI_24308230-S | 502.5  | 534.8  | 637.8  | ZNF537     | <a href="#">NM_020856.1</a> | KIAA1474                          | transcripti        | nucleus regulation      |
| GI_24308232-S | 110    | 151.9  | 115.4  | SYT13      | <a href="#">NM_020826.1</a> | KIAA1427                          | transporte         | membran transport       |
| GI_24308234-S | 112.5  | 121.5  | 109.3  | DPP10      | <a href="#">NM_020868.1</a> | DPRP3;KIAA1492                    | dipeptidyl-        | membran proteolysis     |
| GI_24308236-S | 310.3  | 385.3  | 346.7  | PITPNM2    | <a href="#">NM_020845.1</a> | NIR3;RDGB2;RDGBA2;KIAA1457        |                    |                         |
| GI_24308238-S | 347.3  | 337    | 359.1  | KIAA1524   | <a href="#">NM_020890.1</a> |                                   |                    |                         |
| GI_24308240-S | 180.4  | 146.4  | 147.4  | ZBTB2      | <a href="#">NM_020861.1</a> | ZNF437;KIAA1483;bA351K16.2        | protein            | nucleus regulation      |
| GI_24308244-S | 1053.9 | 549    | 829.4  | MGC24665   | <a href="#">NM_152308.1</a> |                                   |                    |                         |
| GI_24308252-S | 1861.7 | 1215.9 | 1071   | DTX2       | <a href="#">NM_020892.1</a> | RNF58;KIAA1528                    | sugar              | nucleus                 |
| GI_24308254-S | 555.9  | 427.3  | 353.9  | ZNF529     | <a href="#">NM_020951.1</a> | KIAA1615                          |                    | nucleus                 |
| GI_24308256-S | 568.4  | 499.3  | 383.3  | KIAA1576   | <a href="#">NM_020927.1</a> |                                   | alcohol            |                         |

|               |        |        |        |           |                             |                                        |             |              |            |
|---------------|--------|--------|--------|-----------|-----------------------------|----------------------------------------|-------------|--------------|------------|
| GI_24308260-S | 683.9  | 621.6  | 505.8  | MI-ER1    | <a href="#">NM_020948.1</a> | ER1;KIAA1610                           |             |              |            |
| GI_24308262-S | 343    | 439.4  | 310.2  | HTCD37    | <a href="#">NM_021222.1</a> |                                        |             |              |            |
| GI_24308268-S | 2987.9 | 3549   | 3042   | C9orf80   | <a href="#">NM_021218.1</a> | HSPC043                                |             |              |            |
| GI_24308276-S | 101.4  | 114.8  | 111.2  | SMOC2     | <a href="#">NM_022138.1</a> | SMAP2                                  | calcium     | extracellul  |            |
| GI_24308286-S | 8154.1 | 6139.9 | 8117.7 | C9orf88   | <a href="#">NM_022833.1</a> | FLJ13518;FLJ22151;FLJ22298;bA356B19.6; |             |              |            |
| GI_24308288-S | 257.4  | 280.5  | 273.8  | LENG1     | <a href="#">NM_024316.1</a> |                                        | DNA         | nucleus      | regulation |
| GI_24308296-S | 165.8  | 180.6  | 182.6  | ZNF306    | <a href="#">NM_024493.1</a> | ZF47;Zfp47                             | transcripti | nucleus      | regulation |
| GI_24308298-S | 145.5  | 213.8  | 193.5  | ZNF436    | <a href="#">NM_030634.1</a> | KIAA1710                               | DNA         | nucleus      | regulation |
| GI_24308300-S | 149.5  | 190.6  | 152    | KIAA1706  | <a href="#">NM_030636.1</a> |                                        | DNA         | intracellula |            |
| GI_24308302-S | 488.2  | 737.3  | 706.5  | KIAA1720  | <a href="#">NM_030645.1</a> |                                        |             |              |            |
| GI_24308304-S | 278.6  | 309.1  | 479.2  | C20orf129 | <a href="#">NM_030919.1</a> | dJ616B8.3                              |             |              |            |
| GI_24308313-S | 94.4   | 105    | 103    | SLC4A9    | <a href="#">NM_031467.1</a> | AE4                                    | inorganic   | membran      | anion      |
| GI_24308321-S | 1628.2 | 1282.8 | 1131.2 | ZCCHC7    | <a href="#">NM_032226.1</a> | FLJ22611                               | nucleic     |              |            |
| GI_24308325-S | 141.3  | 160.6  | 129.2  | KIAA1811  | <a href="#">NM_032430.1</a> |                                        | cAMP-       |              | protein    |
| GI_24308329-S | 126.7  | 127.2  | 119    | KIAA1804  | <a href="#">NM_032435.1</a> | MLK4                                   | protein-    |              | protein    |
| GI_24308331-S | 391    | 348.5  | 350.8  | BTBD12    | <a href="#">NM_032444.1</a> | KIAA1784                               | protein     |              |            |
| GI_24308333-S | 1227   | 1838.6 | 1482.3 | KIAA1838  | <a href="#">NM_032448.1</a> |                                        |             |              | carbohydr  |
| GI_24308335-S | 303.8  | 318.8  | 319.3  | C6orf168  | <a href="#">NM_032511.1</a> | MGC2817;dJ273F20                       |             |              |            |
| GI_24308337-S | 183.8  | 402    | 202.4  | KIAA1914  | <a href="#">NM_032550.1</a> | FLJ14564                               |             |              |            |
| GI_24308341-S | 123.7  | 139.2  | 122.3  | DMRTC2    | <a href="#">NM_033052.1</a> |                                        | transcripti | nucleus      | sex        |
| GI_24308345-S | 139.8  | 136.4  | 146    | LOC85865  | <a href="#">NM_033107.1</a> |                                        |             |              |            |
| GI_24308349-S | 2263.1 | 2771.9 | 2860   | C6orf153  | <a href="#">NM_033112.1</a> | dJ20C7.4                               |             |              |            |
| GI_24308351-S | 236.2  | 271.8  | 262.5  | DMRTB1    | <a href="#">NM_033067.1</a> |                                        | transcripti | nucleus      | sex        |
| GI_24308353-S | 328.5  | 382.9  | 364.4  | BC008967  | <a href="#">NM_033201.1</a> |                                        |             |              |            |
| GI_24308355-S | 3373.6 | 3145.2 | 3330.9 | BC002942  | <a href="#">NM_033200.1</a> |                                        |             |              |            |
| GI_24308357-S | 96.4   | 102.6  | 101.4  | NT5C1B    | <a href="#">NM_033253.1</a> | AIRP;CN-IB                             |             |              |            |
| GI_24308361-S | 126.1  | 137    | 133.2  | MGC12518  | <a href="#">NM_033548.1</a> |                                        | nucleic     | intracellula | regulation |
| GI_24308363-S | 969.5  | 1117.8 | 1559.8 | LOC90522  | <a href="#">NM_033557.1</a> |                                        |             |              |            |
| GI_24308367-S | 221    | 198.5  | 234.3  | FLJ38944  | <a href="#">NM_152361.1</a> |                                        |             |              |            |
| GI_24308369-S | 266.8  | 292.9  | 293.9  | FLJ31265  | <a href="#">NM_152395.1</a> |                                        |             |              |            |
| GI_24308371-S | 427.2  | 459.2  | 440    | MGC20398  | <a href="#">NM_052857.1</a> |                                        |             |              |            |
| GI_24308375-S | 768.3  | 665.1  | 833.5  | STK11IP   | <a href="#">NM_052902.1</a> | LIP1;LKB1IP;KIAA1898;STK11IP1          |             |              |            |
| GI_24308377-S | 139.8  | 162.3  | 185.8  | TUBGCP5   | <a href="#">NM_052903.1</a> | GCP5;KIAA1899                          | microtubul  | gamma-       | microtubul |
| GI_24308379-S | 92.1   | 84.7   | 85.8   | KIAA1900  | <a href="#">NM_052904.1</a> |                                        | protein     |              |            |
| GI_24308381-S | 750.8  | 957.9  | 843    | LENG8     | <a href="#">NM_052925.1</a> | pp13842;KIAA1932;MGC40108              |             |              |            |
| GI_24308383-S | 92.9   | 92     | 85.5   | PNMA5     | <a href="#">NM_052926.1</a> | KIAA1934                               |             |              |            |
| GI_24308385-S | 279.3  | 319.6  | 317    | LOC115294 | <a href="#">NM_052937.1</a> |                                        |             |              |            |
| GI_24308387-S | 818.1  | 757.9  | 982.5  | DT1P1A10  | <a href="#">NM_058163.1</a> | MGC20451                               |             |              |            |
| GI_24308389-S | 2972.6 | 1897.3 | 1603.7 | C1orf19   | <a href="#">NM_052965.1</a> |                                        |             |              |            |
| GI_24308393-S | 191    | 230.6  | 202.8  | C20orf151 | <a href="#">NM_080833.1</a> | dJ908M14.3                             | DNA         | nucleus      | regulation |
| GI_24308395-S | 171.9  | 163.9  | 206.7  | LOC90379  | <a href="#">NM_138353.1</a> |                                        |             |              |            |
| GI_24308397-S | 350.7  | 320.6  | 346.8  | LOC89894  | <a href="#">NM_138341.1</a> |                                        |             |              |            |
| GI_24308399-S | 434    | 479.2  | 403.7  | C10orf42  | <a href="#">NM_138357.1</a> | FLJ46135                               |             |              |            |
| GI_24308405-S | 2638.9 | 3426.3 | 2965.2 | Ses2      | <a href="#">NM_138355.1</a> |                                        |             |              |            |

|               |        |        |        |           |                             |                       |             |             |             |             |
|---------------|--------|--------|--------|-----------|-----------------------------|-----------------------|-------------|-------------|-------------|-------------|
| GI_24308407-S | 361.8  | 399.1  | 226.2  | CABLES1   | <a href="#">NM_138375.1</a> | HsT2563               |             |             |             | cell cycle  |
| GI_24308411-S | 174.6  | 293.1  | 140    | EAT2      | <a href="#">NM_053282.1</a> |                       |             | molecular   | cellular_co | biological_ |
| GI_24308417-S | 128.7  | 135    | 118.9  | MGC20785  | <a href="#">NM_152721.1</a> |                       |             | insulin     |             |             |
| GI_24308421-S | 177.6  | 222    | 201.6  | MGC35450  | <a href="#">NM_153708.1</a> |                       |             |             | integral to |             |
| GI_24308423-S | 123.7  | 147.7  | 143.1  | MGC40168  | <a href="#">NM_153709.1</a> |                       |             |             |             |             |
| GI_24308425-S | 102.6  | 120.1  | 108.3  | Sprn      | <a href="#">NM_138384.1</a> |                       |             |             |             |             |
| GI_24308431-S | 664.1  | 785.4  | 790.3  | TTC5      | <a href="#">NM_138376.1</a> |                       |             |             |             |             |
| GI_24308433-S | 3179.8 | 3886   | 3934.5 | G6PC3     | <a href="#">NM_138387.1</a> | UGRP                  |             |             |             |             |
| GI_24308439-S | 7739.4 | 7558.2 | 5922   | LOC93343  | <a href="#">NM_138401.1</a> |                       |             |             |             |             |
| GI_24308441-S | 135.3  | 208.5  | 238    | C6orf117  | <a href="#">NM_138409.1</a> |                       |             |             |             |             |
| GI_24308443-S | 316.7  | 320.6  | 286.5  | LOC116143 | <a href="#">NM_138458.1</a> |                       |             |             |             |             |
| GI_24308447-S | 188.8  | 168.7  | 192.2  | LOC151648 | <a href="#">NM_138484.1</a> |                       |             |             |             |             |
| GI_24308449-S | 1366.7 | 1589.8 | 1628.6 | LOC152217 | <a href="#">NM_138487.1</a> |                       |             |             |             |             |
| GI_24308451-S | 2752.3 | 2340.2 | 2000.6 | LOC92715  | <a href="#">NM_138778.1</a> |                       |             |             |             |             |
| GI_24308453-S | 110.9  | 184.4  | 162.7  | C6orf188  | <a href="#">NM_153711.1</a> | MGC45451;dJ493F7.3    |             |             |             |             |
| GI_24308455-S | 301.7  | 429    | 335.3  | MGC10084  | <a href="#">NM_153702.1</a> |                       |             |             |             |             |
| GI_24308457-S | 433    | 448    | 418.5  | MGC46719  | <a href="#">NM_153713.1</a> |                       |             |             |             |             |
| GI_24308459-S | 127.1  | 124.7  | 121.6  | C10orf67  | <a href="#">NM_153714.1</a> | MGC46732              |             |             |             |             |
| GI_24308463-S | 104    | 124.2  | 102.8  | MGC35182  | <a href="#">NM_153707.1</a> |                       |             |             |             |             |
| GI_24308513-S | 118.6  | 128.3  | 101.9  | GSTA5     | <a href="#">NM_153699.1</a> |                       |             |             |             |             |
| GI_24308523-S | 4496.9 | 4721.5 | 5207.6 | TMEM9     | <a href="#">NM_016456.2</a> |                       |             | molecular   | lysosome    | transport   |
| GI_24371247-S | 633.1  | 826.1  | 741.9  | HCBP6     | <a href="#">NM_023934.2</a> | DC44;MGC2495          |             |             |             |             |
| GI_24371249-S | 203.7  | 230.1  | 205.2  | C21orf81  | <a href="#">NM_153750.1</a> |                       |             |             |             |             |
| GI_24371253-S | 92.9   | 106.4  | 121.3  | C21orf84  | <a href="#">NM_153752.1</a> |                       |             |             |             |             |
| GI_24371255-S | 90.2   | 101.5  | 87.8   | C21orf88  | <a href="#">NM_153754.1</a> |                       |             |             |             |             |
| GI_24371257-S | 103.9  | 113    | 109    | C21orf82  | <a href="#">NM_153751.1</a> |                       |             |             |             |             |
| GI_24371259-S | 108.7  | 119.7  | 107.4  | FNDC5     | <a href="#">NM_153756.1</a> | FRCP2                 |             |             |             |             |
| GI_24371261-S | 173.1  | 204.9  | 181.3  | MCM3APAS  | <a href="#">NM_153753.1</a> | C21orf85;FLJ10508     |             |             | integral to |             |
| GI_24371263-S | 93.5   | 93.8   | 84.2   | C21orf89  | <a href="#">NM_153755.1</a> |                       |             |             |             |             |
| GI_24371267-S | 215.7  | 487.7  | 495.2  | NAP1L5    | <a href="#">NM_153757.1</a> | DRLM                  | DNA         | nucleus     | nucleoso    |             |
| GI_24371271-A | 619.7  | 261.8  | 518.5  | ZDHHC14   | <a href="#">NM_153746.1</a> | NEW1CP;FLJ20984       | zinc ion    | integral to | regulation  |             |
| GI_24415382-S | 784.4  | 475.5  | 529.7  | PELP1     | <a href="#">NM_014389.1</a> | MNAR;P160             |             |             |             |             |
| GI_24415399-S | 134    | 147.7  | 137.4  | MYO1C     | <a href="#">NM_033375.1</a> | myr2;MYO1E            | myosin      | unconvent   | perception  |             |
| GI_24415403-S | 172.7  | 190.1  | 177    | MDN1      | <a href="#">NM_014611.1</a> | KIAA0301              | nucleotide  | nucleus     | protein     |             |
| GI_24415991-S | 110.3  | 109    | 97.4   | C21orf99  | <a href="#">NM_153773.1</a> |                       |             |             |             |             |
| GI_24415993-S | 1194.9 | 993.9  | 866.3  | SFRS7     | <a href="#">NM_006276.3</a> | 9G8;HSSG1             | pre-mRNA    | nucleus     | mRNA        |             |
| GI_24416001-S | 1710.8 | 1596.7 | 1475   | RBAF600   | <a href="#">NM_020765.1</a> | KIAA0462;KIAA1307     |             |             |             |             |
| GI_24429563-I | 97.6   | 118.6  | 88.8   | PDE7A     | <a href="#">NM_002604.1</a> | HCP1                  | cAMP-       |             |             |             |
| GI_24429565-A | 92.6   | 106.1  | 97.9   | PDE7A     | <a href="#">NM_002603.1</a> | HCP1                  | cAMP-       |             |             |             |
| GI_24429565-I | 109.2  | 121.5  | 102.7  | PDE7A     | <a href="#">NM_002603.1</a> | HCP1                  | cAMP-       |             |             |             |
| GI_24429571-S | 218.1  | 234    | 206.7  | TAF1L     | <a href="#">NM_153809.1</a> | TAF2A2                |             |             |             |             |
| GI_24429573-S | 913.8  | 749.3  | 563.5  | SLC38A6   | <a href="#">NM_153811.1</a> | NAT-1                 | transcripti | membran     | regulation  |             |
| GI_24429581-S | 580.3  | 490.1  | 548.1  | ZFPM1     | <a href="#">NM_153813.1</a> | FOG;FOG1;ZNF408       |             |             |             |             |
| GI_24429585-S | 108.1  | 101.3  | 102.6  | FCGR3A    | <a href="#">NM_000569.4</a> | CD16;FCG3;FCGR3;IGFR3 | receptor    | integral to | immune      |             |

|               |         |        |        |           |                             |                                       |              |             |             |
|---------------|---------|--------|--------|-----------|-----------------------------|---------------------------------------|--------------|-------------|-------------|
| GI_24429591-S | 397.6   | 584.9  | 639.1  | GALNACT-2 | <a href="#">NM_018590.3</a> | PRO0082;MGC40204;CSGalNAcT-2          | transferas   |             |             |
| GI_24430130-S | 3310    | 4899   | 4466.7 | WBP1      | <a href="#">NM_012477.2</a> | WBP-1;MGC15305                        | receptor     |             |             |
| GI_24430131-S | 360.8   | 468.8  | 658.9  | WBP2      | <a href="#">NM_012478.2</a> | WBP-2;MGC18269                        | protein      | signal      |             |
| GI_24430133-I | 99.4    | 103.8  | 101.9  | DPM3      | <a href="#">NM_018973.3</a> | MGC34275                              |              | endoplas    | carbohydr   |
| GI_24430136-S | 1847.8  | 1828.5 | 1896.6 | DXS9879E  | <a href="#">NM_006014.2</a> | CVG5;ESO3;ITBA2;DXS9951E              | molecular    | cellular_co | biological_ |
| GI_24430138-S | 355.3   | 418.3  | 410    | RPAP1     | <a href="#">NM_015540.2</a> | MGC858;FLJ12732;KIAA1403;DKFZP727M1   |              |             |             |
| GI_24430140-S | 910.8   | 1545.1 | 1284.6 | FBN1      | <a href="#">NM_000138.2</a> | FBN;SGS;MASS;MFS1;OCTD                | extracellul  | extracellul | vision      |
| GI_24430142-S | 98.7    | 95.1   | 91.5   | GFAP      | <a href="#">NM_002055.2</a> |                                       | structural   | intermedia  |             |
| GI_24430143-S | 165.4   | 182.2  | 164.6  | GSTA3     | <a href="#">NM_000847.3</a> | GTA3;GSTA3-3;MGC22232                 | glutathion   |             | response    |
| GI_24430145-S | 701.5   | 606.1  | 504.1  | NUP153    | <a href="#">NM_005124.2</a> | N153;HNUP153                          | transporte   | nuclear     | nucleocyto  |
| GI_24430147-A | 985.6   | 852.6  | 788.9  | NUP155    | <a href="#">NM_004298.2</a> | N155;KIAA0791                         | transporte   | nuclear     | nucleocyto  |
| GI_24430147-I | 113     | 141.2  | 124.2  | NUP155    | <a href="#">NM_004298.2</a> | N155;KIAA0791                         | transporte   | nuclear     | nucleocyto  |
| GI_24430148-I | 99.1    | 112.8  | 92     | NUP155    | <a href="#">NM_153485.1</a> | N155;KIAA0791                         | transporte   | nuclear     | nucleocyto  |
| GI_24430150-S | 10021.5 | 10593  | 9480.9 | PSMC1     | <a href="#">NM_002802.2</a> | S4;p56;P26S4;MGC8541;MGC24583         | proteasom    | 26S         | protein     |
| GI_24430152-S | 2581.9  | 3002.2 | 2549.4 | PSMC2     | <a href="#">NM_002803.2</a> | S7;MSS1;MGC3004                       | adenosine    | 26S         | virulence   |
| GI_24430153-S | 2762.1  | 2907.3 | 3062.2 | PSMC3     | <a href="#">NM_002804.3</a> | TBP1;MGC8487                          | transcripti  | 26S         | protein     |
| GI_24430154-A | 5057.3  | 5717.2 | 5256.6 | PSMC4     | <a href="#">NM_153001.1</a> | S6;TBP7;MIP224;MGC8570;MGC13687;MG    | proteasom    | 26S         | proteolysis |
| GI_24430156-I | 1228.9  | 1330.8 | 1313.2 | PSMC4     | <a href="#">NM_006503.2</a> | S6;TBP7;MIP224;MGC8570;MGC13687;MG    | proteasom    | 26S         | proteolysis |
| GI_24430159-S | 2338    | 2693.9 | 2376.9 | PSMC6     | <a href="#">NM_002806.2</a> | P42;P44;SUG2;CADP44;MGC12520          | proteasom    | 26S         | protein     |
| GI_24430161-I | 108.1   | 132.1  | 99.3   | PMP22     | <a href="#">NM_000304.2</a> | DSS;HNPP;CMT1A;CMT1E;GAS-             |              | membran     | negative    |
| GI_24430162-I | 127.1   | 162.8  | 209.6  | PMP22     | <a href="#">NM_153321.1</a> | DSS;HNPP;CMT1A;CMT1E;GAS-             |              | membran     | negative    |
| GI_24430164-A | 627.1   | 1347.9 | 1851.1 | PMP22     | <a href="#">NM_153322.1</a> | DSS;HNPP;CMT1A;CMT1E;GAS-             |              | membran     | negative    |
| GI_24430166-I | 88.6    | 93.5   | 89.4   | PANK2     | <a href="#">NM_024960.3</a> | HSS;HARP;PKAN;NBIA1;C20orf48;FLJ11729 |              |             |             |
| GI_24430168-A | 913.6   | 794.6  | 467.4  | PANK2     | <a href="#">NM_153637.1</a> | HSS;HARP;PKAN;NBIA1;C20orf48;FLJ11729 |              |             |             |
| GI_24430178-S | 181.1   | 240.3  | 208.7  | PANK3     | <a href="#">NM_024594.2</a> | FLJ12899;MGC16863                     | ATP          |             | coenzyme    |
| GI_24430179-S | 104.9   | 120.3  | 113.4  | ODF1      | <a href="#">NM_024410.2</a> | ODF;RT7;ODF2;ODFP;SODF;ODF27;ODFP     | structural   | outer       | spermatog   |
| GI_24430180-I | 554.5   | 756.4  | 693.6  | ODF2      | <a href="#">NM_002540.3</a> | ODF84;ODF2/1;ODF2/2;MGC9034           | structural   |             | cell shape  |
| GI_24430182-A | 636.7   | 645.2  | 605.3  | ODF2      | <a href="#">NM_153437.1</a> | ODF84;ODF2/1;ODF2/2;MGC9034           | structural   |             | cell shape  |
| GI_24430182-I | 174.1   | 178.9  | 190.5  | ODF2      | <a href="#">NM_153437.1</a> | ODF84;ODF2/1;ODF2/2;MGC9034           | structural   |             | cell shape  |
| GI_24430185-S | 1874.6  | 1645.8 | 1999.9 | PIGC      | <a href="#">NM_153747.1</a> | GPI2;MGC2049                          | catalytic    | endoplas    | GPI         |
| GI_24430187-S | 727.7   | 632.9  | 584.2  | PIGH      | <a href="#">NM_004569.2</a> | GPI-H                                 | catalytic    | endoplas    | GPI         |
| GI_24430188-S | 148.1   | 150.5  | 128.7  | PIGL      | <a href="#">NM_004278.2</a> |                                       | hydrolase    | endoplas    | GPI         |
| GI_24430189-S | 1013    | 979.9  | 1204.7 | KRT15     | <a href="#">NM_002275.2</a> | K15;CK15;K1CO                         | structural   | intermedia  | epidermal   |
| GI_24430191-S | 125.2   | 112.6  | 122.5  | KRT16     | <a href="#">NM_005557.2</a> | K16;CK16;K1CP;NEPPK;KRT16A            | structural   | intermedia  | epidermal   |
| GI_24430193-I | 110.7   | 121.1  | 108.8  | IL17RC    | <a href="#">NM_032732.2</a> | IL17-RL;MGC10763                      |              |             |             |
| GI_24430196-I | 134.2   | 158.5  | 132    | IL17RC    | <a href="#">NM_153461.1</a> | IL17-RL;MGC10763                      |              |             |             |
| GI_24430200-A | 331.8   | 346.9  | 270.4  | IL17RC    | <a href="#">NM_153463.1</a> | IL17-RL;MGC10763                      |              |             |             |
| GI_24430200-I | 205.4   | 241.3  | 204.1  | IL17RC    | <a href="#">NM_153463.1</a> | IL17-RL;MGC10763                      |              |             |             |
| GI_24430205-A | 123     | 115    | 110.8  | IL17RE    | <a href="#">NM_153481.1</a> | FLJ23658                              |              |             |             |
| GI_24430207-I | 110.2   | 112.3  | 103.6  | IL17RE    | <a href="#">NM_153482.1</a> | FLJ23658                              |              |             |             |
| GI_24430209-I | 212.4   | 241.5  | 223.8  | IL17RE    | <a href="#">NM_153483.1</a> | FLJ23658                              |              |             |             |
| GI_24430211-S | 107.3   | 134.7  | 110.2  | IL23R     | <a href="#">NM_144701.2</a> |                                       | receptor     |             |             |
| GI_24430213-S | 275.9   | 317.6  | 279.3  | IL10RA    | <a href="#">NM_001558.2</a> | IL10R;CDW210A;HIL-10R;IL-10R1         | interleukin- | integral to |             |
| GI_24430214-S | 1378.8  | 1627.8 | 1592.3 | IL10RB    | <a href="#">NM_000628.3</a> | CRFB4;CRF2-4;CDW210B;IL-10R2          | interleukin- | integral to | signal      |

|               |        |        |        |          |                             |                                        |              |             |             |
|---------------|--------|--------|--------|----------|-----------------------------|----------------------------------------|--------------|-------------|-------------|
| GI_24430216-S | 221.7  | 264.1  | 236.9  | IL10     | <a href="#">NM_000572.2</a> | CSIF;TGIF;IL-10;IL10A                  | cytokine     | soluble     | positive    |
| GI_24430217-S | 2057.9 | 3444.7 | 3585.4 | IL11     | <a href="#">NM_000641.2</a> | AGIF;IL-11                             | cytokine     | extracellul | positive    |
| GI_24430218-S | 283.4  | 270.4  | 165.2  | IL12A    | <a href="#">NM_000882.2</a> | CLMF;NFSK;NKSF1;IL-12A                 | interleukin- | extracellul | immune      |
| GI_24430220-I | 734.7  | 676    | 914.1  | IL1RAP   | <a href="#">NM_002182.2</a> | IL1R3;IL-1RACP                         | signal       | integral to | immune      |
| GI_24430221-A | 185.2  | 216.5  | 248.6  | IL1RAP   | <a href="#">NM_134470.2</a> | IL1R3;IL-1RACP                         | signal       | integral to | immune      |
| GI_24430221-I | 112.8  | 111.8  | 105.4  | IL1RAP   | <a href="#">NM_134470.2</a> | IL1R3;IL-1RACP                         | signal       | integral to | immune      |
| GI_24431938-S | 316.7  | 570.8  | 181.5  | FLJ13236 | <a href="#">NM_024902.2</a> |                                        |              |             |             |
| GI_24431940-S | 84.6   | 110.2  | 76.6   | FCGR1A   | <a href="#">NM_000566.2</a> | CD64;FCRI;IGFR1                        | receptor     | integral to | phagocyto   |
| GI_24431942-S | 147.2  | 188.1  | 170.9  | PDE1B    | <a href="#">NM_000924.2</a> | PDE1B1;PDES1B                          | calmoduli    |             | apoptosis   |
| GI_24431943-S | 416.6  | 393.9  | 499.7  | GLRB     | <a href="#">NM_000824.2</a> |                                        | glycine-     | integral to | small       |
| GI_24431944-S | 125    | 139.1  | 124.1  | SOAT1    | <a href="#">NM_003101.2</a> | ACAT;SOAT;STAT;ACACT;ACAT1             | acyltransf   | membran     | cholestero  |
| GI_24431948-S | 87.1   | 90     | 104    | CDX2     | <a href="#">NM_001265.2</a> | CDX3;CDX-3                             | transcripti  | nucleus     | histogene   |
| GI_24431954-S | 469.4  | 379.7  | 418.7  | ZNF267   | <a href="#">NM_003414.3</a> | HZF2                                   | DNA          | nucleus     | developm    |
| GI_24431956-S | 1072.8 | 965.6  | 904.4  | C10orf69 | <a href="#">NM_006459.2</a> | KEO4;KEO4                              |              |             |             |
| GI_24431959-S | 263.6  | 388.6  | 292.1  | DNAJB4   | <a href="#">NM_007034.3</a> | HLJ1;DNAJW                             | chaperone    |             | response    |
| GI_24431962-S | 132.6  | 151.6  | 138.2  | CD5      | <a href="#">NM_014207.2</a> | T1;LEU1                                | scavenger    | integral to | cell        |
| GI_24431963-S | 117.5  | 132.7  | 103.7  | HBS1L    | <a href="#">NM_006620.2</a> | ERFS;HBS1;EF-                          | GTP          |             | protein     |
| GI_24431967-S | 287.5  | 357.2  | 308.8  | ARC      | <a href="#">NM_015193.2</a> | KIAA0278                               |              |             |             |
| GI_24431968-S | 215.8  | 237.1  | 238.7  | PTD004   | <a href="#">NM_013341.2</a> |                                        | GTP          |             |             |
| GI_24431972-S | 2529.1 | 2224.8 | 2359.8 | FLJ20241 | <a href="#">NM_017721.2</a> |                                        |              |             |             |
| GI_24431974-S | 155.6  | 167.9  | 144.2  | C10orf12 | <a href="#">NM_015652.2</a> | FLJ13022;DKFZP564P1916                 |              |             |             |
| GI_24431976-S | 2015.6 | 1732.3 | 2508.3 | FLJ10307 | <a href="#">NM_018053.2</a> |                                        |              |             |             |
| GI_24431981-S | 792.7  | 653.3  | 581.2  | USP47    | <a href="#">NM_017944.2</a> | FLJ20727                               |              |             |             |
| GI_24431984-S | 105    | 134.8  | 111.9  | PIWIL2   | <a href="#">NM_018068.2</a> | HILI;mili;PIWIL1L;FLJ10351             |              |             |             |
| GI_24431986-S | 136    | 142.3  | 118.6  | C6orf35  | <a href="#">NM_018452.2</a> | BM033                                  |              |             |             |
| GI_24431990-S | 248.7  | 424.4  | 680.7  | C6orf85  | <a href="#">NM_021945.2</a> | FLJ22174                               |              |             |             |
| GI_24431993-S | 625.3  | 803.7  | 919.1  | MGC3234  | <a href="#">NM_023947.2</a> |                                        |              |             |             |
| GI_24431995-S | 297    | 324.1  | 321.1  | SH3GLB2  | <a href="#">NM_020145.2</a> | KIAA1848                               |              |             |             |
| GI_24431998-S | 292.9  | 254.9  | 285    | DCLRE1B  | <a href="#">NM_022836.2</a> | SNM1B;FLJ12810;FLJ13998                |              |             |             |
| GI_24432005-S | 884.9  | 700.7  | 679.2  | FLJ22341 | <a href="#">NM_024599.2</a> |                                        |              |             |             |
| GI_24432008-S | 490.6  | 459    | 278.2  | FLJ21308 | <a href="#">NM_024615.2</a> |                                        |              |             |             |
| GI_24432010-S | 246.4  | 286.1  | 130.7  | PAQR6    | <a href="#">NM_024897.2</a> | FLJ22672                               |              |             |             |
| GI_24432015-S | 582.7  | 742.3  | 637.8  | FLJ12529 | <a href="#">NM_024811.2</a> | MGC9315;FLJ39024                       | nucleic      |             |             |
| GI_24432019-S | 254.9  | 275.1  | 268    | FRMD1    | <a href="#">NM_024919.2</a> | FLJ00181;FLJ22615;FLJ40260;bA164L23.1; |              |             |             |
| GI_24432021-S | 83     | 100.2  | 100.8  | NYD-TSP1 | <a href="#">NM_032567.2</a> |                                        |              |             |             |
| GI_24432025-S | 614.5  | 597.1  | 432.8  | FLJ14360 | <a href="#">NM_032775.2</a> |                                        | protein      |             |             |
| GI_24432029-S | 118.5  | 118.2  | 87     | BRUNOL6  | <a href="#">NM_052840.2</a> |                                        | nucleic      |             |             |
| GI_24432033-S | 147    | 157.6  | 155    | NR5A1    | <a href="#">NM_004959.3</a> | ELP;SF1;FTZ1;SF-1;AD4BP;FTZF1          | ligand-      | nucleus     | primary     |
| GI_24432034-S | 106.4  | 118.7  | 110.1  | NYD-SP25 | <a href="#">NM_033516.2</a> |                                        |              |             |             |
| GI_24432036-S | 265.4  | 260.7  | 265.2  | LOC83693 | <a href="#">NM_031463.3</a> |                                        | cysteine-    |             | proteolysis |
| GI_24432038-S | 895.9  | 656.2  | 667.6  | ODAG     | <a href="#">NM_021167.2</a> | FLJ22489;RG083M05.2                    |              |             |             |
| GI_24432041-S | 1798.8 | 1280   | 1391   | CHRAC1   | <a href="#">NM_017444.3</a> | YCL1;CHARC1;CHARC15;CHRAC15            | epsilon      | kinesin     | chromatin   |
| GI_24432048-S | 99.8   | 108.9  | 95     | HCA3     | <a href="#">NM_138703.2</a> |                                        |              |             |             |
| GI_24432049-S | 366.4  | 443.9  | 380.3  | RYBP     | <a href="#">NM_012234.3</a> | YEA1                                   | transcripti  | nucleus     | developm    |

|               |        |        |        |           |                             |                                      |            |             |              |
|---------------|--------|--------|--------|-----------|-----------------------------|--------------------------------------|------------|-------------|--------------|
| GI_24432051-S | 2144.7 | 1290.4 | 821.6  | FLJ25348  | <a href="#">NM_144569.2</a> |                                      |            |             |              |
| GI_24432055-S | 284.6  | 329.6  | 308.3  | FLJ32356  | <a href="#">NM_144671.2</a> |                                      |            |             |              |
| GI_24432057-S | 165.2  | 421.3  | 196.9  | C9orf3    | <a href="#">NM_032823.3</a> | C90RF3;FLJ14675                      |            |             |              |
| GI_24432059-S | 112.6  | 98.6   | 101.5  | MGC26733  | <a href="#">NM_144992.2</a> |                                      |            |             |              |
| GI_24432063-S | 354.6  | 399.9  | 381.9  | C10orf63  | <a href="#">NM_145010.2</a> | MGC26778                             |            |             |              |
| GI_24432064-S | 140.9  | 153.7  | 134.7  | FLJ25124  | <a href="#">NM_144698.2</a> |                                      |            |             |              |
| GI_24432066-S | 124    | 114    | 93.8   | C10orf4   | <a href="#">NM_145246.2</a> | FRA10AC1;F26C11.1-like               |            |             |              |
| GI_24432071-S | 100.5  | 93.7   | 87.8   | FBXL13    | <a href="#">NM_145032.2</a> | MGC21636                             |            |             |              |
| GI_24432073-S | 700.1  | 774.6  | 764.8  | MGC33338  | <a href="#">NM_152366.2</a> |                                      |            |             |              |
| GI_24432075-S | 102    | 103.5  | 100.7  | LOC136263 | <a href="#">NM_145268.2</a> |                                      |            |             |              |
| GI_24432076-S | 433.9  | 325.8  | 324.9  | FLJ33516  | <a href="#">NM_152423.2</a> |                                      |            |             |              |
| GI_24432082-S | 109.1  | 109.5  | 109.5  | FLJ34658  | <a href="#">NM_152404.2</a> |                                      | transferas |             | metabolis    |
| GI_24432084-S | 132.6  | 142.2  | 141.8  | MGC39715  | <a href="#">NM_152628.2</a> |                                      |            |             | intracellula |
| GI_24432088-S | 111.6  | 113.6  | 108.8  | GPR66     | <a href="#">NM_006056.2</a> | GPC-R;NMU1R;(FM-3)                   | neuropepti | integral to | G-protein    |
| GI_24432092-S | 676.4  | 759.1  | 893.2  | PHF13     | <a href="#">NM_153812.1</a> | MGC43399                             | DNA        |             | regulation   |
| GI_24432094-S | 209.3  | 198.4  | 202.9  | FLJ23614  | <a href="#">NM_152695.2</a> |                                      |            |             |              |
| GI_24432099-I | 142.3  | 161.1  | 132.9  | GSG1      | <a href="#">NM_153823.1</a> | MGC3146                              |            |             |              |
| GI_24432101-I | 127.1  | 119.6  | 86.1   | HS6ST2    | <a href="#">NM_147175.2</a> |                                      |            |             |              |
| GI_24432103-I | 139.5  | 142.3  | 117.5  | SLA/LP    | <a href="#">NM_153825.1</a> |                                      | tRNA       |             |              |
| GI_24462252-S | 503    | 607.3  | 457.1  | ZNF25     | <a href="#">NM_145011.2</a> | KOX19;FLJ31890                       | DNA        | nucleus     | regulation   |
| GI_24469782-S | 1377.7 | 1406.1 | 2436   | AGTRAP    | <a href="#">NM_020350.3</a> | ATRAP                                |            |             |              |
| GI_24475585-S | 1336   | 2446.8 | 2340.5 | UCC1      | <a href="#">NM_017549.1</a> | MERP1                                | calcium    | extracellul | cell-matrix  |
| GI_24475588-S | 317.3  | 244.2  | 225.3  | BBC3      | <a href="#">NM_014417.2</a> | JFY1;PUMA;PUMA/JFY1                  |            |             |              |
| GI_24475617-S | 233.3  | 255.6  | 221.9  | NUMBL     | <a href="#">NM_004756.2</a> | NBL;CAG3A;CTG3a;NUMBR;NUMB-          |            |             | neurogene    |
| GI_24475618-S | 372.1  | 351.4  | 171.2  | CD83      | <a href="#">NM_004233.2</a> | BL11;HB15                            | lymphocyt  | integral to | humoral      |
| GI_24475622-S | 404.2  | 1273.8 | 374.5  | MDK       | <a href="#">NM_002391.2</a> | NEGF2                                | heparin    | extracellul | signal       |
| GI_24475623-S | 93.2   | 100.5  | 85.1   | TYR       | <a href="#">NM_000372.2</a> | OCA1A;OCAIA                          | monophen   | Golgi       | eye          |
| GI_24475624-S | 3913.4 | 4918.7 | 5094.8 | DBI       | <a href="#">NM_020548.2</a> | ACBP;ACBD1                           | diazepam-  |             | transport    |
| GI_24475625-S | 140.9  | 146.3  | 112.5  | SERPINA7  | <a href="#">NM_000354.2</a> | TBG                                  | protein    | soluble     |              |
| GI_24475626-S | 262.2  | 297.9  | 271.2  | TSC1      | <a href="#">NM_000368.2</a> | LAM;TSC;HAMARTIN;KIAA0243            | tumor      | kinesin     | Rho          |
| GI_24475627-S | 108.1  | 99.5   | 107    | TRPM5     | <a href="#">NM_014555.2</a> | MTR1;LTRPC5                          | ion        | integral to | oncogene     |
| GI_24475633-S | 241.2  | 282.9  | 251.5  | EP400     | <a href="#">NM_015409.2</a> | P400;CAGH32;TNRC12;KIAA1498;KIAA1818 |            |             |              |
| GI_24475636-S | 124.4  | 121.1  | 129.4  | GNMT      | <a href="#">NM_018960.2</a> |                                      | N-         |             | protein      |
| GI_24475638-S | 224.2  | 241.4  | 151    | KIAA1295  | <a href="#">NM_017963.2</a> | FLJ20831                             |            |             |              |
| GI_24475639-S | 2065.2 | 1851.9 | 1990.1 | HSA272196 | <a href="#">NM_018405.2</a> |                                      | molecular  | cellular_co | biological_  |
| GI_24475643-S | 985.6  | 1169.7 | 935.1  | RARSL     | <a href="#">NM_020320.2</a> | PRO1992;MGC14993;MGC23778;dJ382I10.  | ATP        |             | arginyl-     |
| GI_24475645-S | 224.8  | 245.2  | 221    | TUBGCP6   | <a href="#">NM_020461.2</a> | GCP6;KIAA1669;DJ402G11.6             | microtubul | gamma-      | microtubul   |
| GI_24475647-S | 282.5  | 333.8  | 284.8  | KIAA1468  | <a href="#">NM_020854.2</a> | HsT885                               |            |             |              |
| GI_24475651-S | 94.9   | 86.3   | 102.4  | NTN4      | <a href="#">NM_021229.2</a> | PRO3091                              | structural | extracellul |              |
| GI_24475652-S | 300.1  | 306.8  | 285.8  | ZNF143    | <a href="#">NM_003442.3</a> | SBF;STAF;pHZ-1                       | RNA        | nucleus     | regulation   |
| GI_24475653-S | 98     | 89.9   | 94.4   | PROK2     | <a href="#">NM_021935.2</a> | BV8;PK2;MIT1                         | molecular  | cellular_co | neuropepti   |
| GI_24475655-S | 270.2  | 287.4  | 347.5  | SHFM3     | <a href="#">NM_022039.2</a> | DAC;SHSF3;dactylin                   | molecular  | ubiquitin   | ubiquitin-   |
| GI_24475656-S | 248.7  | 422.7  | 267.5  | SMOC1     | <a href="#">NM_022137.2</a> |                                      | calcium    | basement    |              |
| GI_24475660-S | 120.3  | 136.9  | 113.4  | DIO3OS    | <a href="#">NM_022345.2</a> | C14orf134                            |            |             |              |

|               |        |        |        |          |                             |                                     |              |                          |
|---------------|--------|--------|--------|----------|-----------------------------|-------------------------------------|--------------|--------------------------|
| GI_24475700-S | 1000.6 | 1158   | 1011.5 | FLJ21673 | <a href="#">NM_030898.2</a> |                                     |              |                          |
| GI_24475703-S | 153.3  | 186.2  | 162.3  | EPC1     | <a href="#">NM_025209.2</a> | transcripti                         | nucleus      | transcripti              |
| GI_24475708-S | 3306.8 | 4172.7 | 2573.6 | CCNL2    | <a href="#">NM_030937.2</a> | PCEE;SB138;HLA-ISO;ania-6b;HCLA-ISO |              |                          |
| GI_24475709-S | 1315.1 | 1555.8 | 1700.9 | HBLD2    | <a href="#">NM_030940.2</a> | MGC4276                             | molecular    |                          |
| GI_24475711-S | 1121.5 | 694.9  | 980.3  | HT036    | <a href="#">NM_031207.2</a> |                                     |              |                          |
| GI_24475719-S | 98.1   | 97.6   | 84.6   | C10orf11 | <a href="#">NM_032024.2</a> | CDA017                              |              |                          |
| GI_24475722-S | 374    | 358.8  | 387.9  | C6orf200 | <a href="#">NM_032519.2</a> |                                     |              |                          |
| GI_24475723-S | 85.5   | 88.5   | 83.5   | CAPS2    | <a href="#">NM_032606.2</a> |                                     | calcium      |                          |
| GI_24475724-S | 110.6  | 95.7   | 87.2   | ZNF566   | <a href="#">NM_032838.2</a> | FLJ14779;MGC12515                   | nucleic      | nucleus regulation       |
| GI_24475725-S | 1509.7 | 1479.5 | 1531.5 | C7orf35  | <a href="#">NM_032936.2</a> | DC32                                |              |                          |
| GI_24475727-S | 398.3  | 450    | 444.7  | C9orf37  | <a href="#">NM_032937.2</a> |                                     |              |                          |
| GI_24475729-S | 92.7   | 89.1   | 78.7   | NYD-SP28 | <a href="#">NM_033124.2</a> |                                     |              |                          |
| GI_24475732-S | 123.9  | 123.8  | 124.7  | LOC94105 | <a href="#">NM_033209.2</a> |                                     | molecular    | cellular_co biological_  |
| GI_24475733-S | 609.2  | 570.5  | 623.4  | CASC3    | <a href="#">NM_007359.3</a> | BTZ;MLN51                           | molecular    | cellular_co biological_  |
| GI_24475740-S | 475.2  | 525.8  | 242.4  | HTRA3    | <a href="#">NM_053044.2</a> |                                     | insulin-like | extracellul proteolysis  |
| GI_24475742-S | 196.9  | 222.6  | 203.3  | C8orf12  | <a href="#">NM_054017.2</a> |                                     |              |                          |
| GI_24475750-S | 83.4   | 87     | 91.5   | GDEP     | <a href="#">NM_058168.2</a> |                                     |              |                          |
| GI_24475778-S | 355.5  | 459.4  | 406    | GPHA2    | <a href="#">NM_130769.2</a> | GPA2;ZSIG51                         | hormone      | extracellul              |
| GI_24475808-S | 124.6  | 148    | 153.8  | BRI3BP   | <a href="#">NM_080626.4</a> | KG19                                |              |                          |
| GI_24475811-S | 837.6  | 1028.5 | 837.1  | LOC56181 | <a href="#">NM_019557.3</a> |                                     |              |                          |
| GI_24475812-S | 833.7  | 945.2  | 778.3  | MKL1     | <a href="#">NM_020831.2</a> | MAL;AMKL;BSAC;KIAA1438              | DNA          | nucleus cell growth      |
| GI_24475813-S | 194.1  | 237    | 249.2  | RPC8     | <a href="#">NM_138338.1</a> | KIAA1665;MGC29654                   | protein      | DNA- transcripti         |
| GI_24475827-S | 112.7  | 125.4  | 125.6  | C21orf94 | <a href="#">NM_145180.2</a> |                                     |              |                          |
| GI_24475831-S | 113.8  | 132.5  | 117.9  | NCR3     | <a href="#">NM_147130.1</a> | 1C7;LY117;NKp30                     |              |                          |
| GI_24475836-S | 154.9  | 155.2  | 160.6  | ZBTB9    | <a href="#">NM_152735.2</a> | MGC23166                            | protein      |                          |
| GI_24475838-S | 145.3  | 158.3  | 148.5  | STEPP    | <a href="#">NM_152990.2</a> |                                     |              |                          |
| GI_24475840-S | 113.8  | 94.6   | 94     | DEFB123  | <a href="#">NM_153324.2</a> | DEFB-23                             |              | xenobiotic               |
| GI_24475843-S | 152    | 176.1  | 186.5  | SLC2A14  | <a href="#">NM_153449.2</a> | GLUT14                              | glucose      | integral to carbohydr    |
| GI_24475844-S | 645.1  | 805.4  | 906.6  | MDGA1    | <a href="#">NM_153487.2</a> | GPIM                                | nitrogenas   | membran nitrogen         |
| GI_24475845-S | 311.8  | 388    | 226    | ZNF532   | <a href="#">NM_018181.3</a> | FLJ10697                            |              |                          |
| GI_24475846-S | 422.3  | 514    | 340.3  | IVNS1ABP | <a href="#">NM_006469.2</a> | ND1;NS-1;NS1-BP;HSPC068;KIAA0850    | protein      | transcripti response     |
| GI_24475850-S | 165.1  | 133.5  | 127.4  | POF1B    | <a href="#">NM_024921.2</a> | FLJ22792                            |              |                          |
| GI_24475852-A | 84.1   | 97     | 88.9   | AF15Q14  | <a href="#">NM_020380.2</a> |                                     |              |                          |
| GI_24475858-S | 207.8  | 238.7  | 222.9  | ZNF101   | <a href="#">NM_033204.2</a> | HZF12;DKFZp570I0164                 | metallope    | intracellula proteolysis |
| GI_24475860-S | 2520.7 | 3299   | 3449.7 | PHP14    | <a href="#">NM_014172.2</a> | CGI-202;HSPC141;DKFZp564M173        | phosphohi    | cytosol dephosph         |
| GI_24475862-S | 133.9  | 167    | 147.3  | H1FOO    | <a href="#">NM_153833.1</a> | osH1                                | DNA          | nucleus nucleoso         |
| GI_24475864-S | 114.7  | 139.5  | 122.7  | GPR112   | <a href="#">NM_153834.1</a> | PGR17;RP1-299I16                    | G-protein    | membran neuropepti       |
| GI_24475866-S | 122.9  | 149.6  | 131.4  | GPR113   | <a href="#">NM_153835.1</a> | PGR23;hGPCR37                       | G-protein    | membran neuropepti       |
| GI_24475868-S | 270.6  | 317.4  | 280.3  | CREG2    | <a href="#">NM_153836.1</a> |                                     |              |                          |
| GI_24475870-S | 115.9  | 139.5  | 127.9  | GPR114   | <a href="#">NM_153837.1</a> | PGR27                               |              |                          |
| GI_24475872-S | 122.6  | 197.4  | 239.9  | GPR115   | <a href="#">NM_153838.1</a> | PGR18;FLJ38076                      | G-protein    | membran neuropepti       |
| GI_24475874-S | 174.7  | 206.6  | 183    | GPR111   | <a href="#">NM_153839.1</a> | PGR20;hGPCR35                       | G-protein    | integral to neuropepti   |
| GI_24475876-S | 208    | 216.9  | 213.6  | GPR110   | <a href="#">NM_153840.1</a> | PGR19;hGPCR36                       | G-protein    | membran neuropepti       |
| GI_24475878-S | 641.2  | 1631.6 | 787.7  | FUCA1    | <a href="#">NM_000147.2</a> |                                     | alpha-L-     | lysosome carbohydr       |

|               |         |        |        |           |                             |                                     |              |                       |
|---------------|---------|--------|--------|-----------|-----------------------------|-------------------------------------|--------------|-----------------------|
| GI_24475879-S | 2181.7  | 2287   | 2192.9 | PCCB      | <a href="#">NM_000532.2</a> | propionyl-                          | mitochond    | fatty acid            |
| GI_24475884-S | 780.3   | 877.2  | 1177   | C11orf13  | <a href="#">NM_003475.2</a> | HRC1;HRAS1                          | DNA          | kinesin neuropepti    |
| GI_24475885-S | 155.8   | 173.1  | 141.3  | SOAT2     | <a href="#">NM_003578.2</a> | ACAT2;ARGP2;ACACT2                  | acyltransf   | endoplas cholestero   |
| GI_24475886-S | 241.6   | 297.9  | 251.9  | GPR49     | <a href="#">NM_003667.2</a> | FEX;HG38;LGR5;GPR67;GRP49           | G-protein    | integral to G-protein |
| GI_24475887-S | 149.7   | 163.9  | 159.3  | RIPK1     | <a href="#">NM_003804.2</a> | RIP                                 | protein      | apoptosis             |
| GI_24475891-S | 919.1   | 757.7  | 780.7  | CSPG6     | <a href="#">NM_005445.2</a> | BAM;HCAP;SMC3;SMC3L1                | chondroiti   | nuclear DNA           |
| GI_24475893-S | 40862.4 | 33459  | 32258  | GNB2L1    | <a href="#">NM_006098.2</a> | H12.3;RACK1;Gnb2-rs1                | protein      | peripheral protein    |
| GI_24475894-S | 325.3   | 235.8  | 340.1  | PBX3      | <a href="#">NM_006195.2</a> |                                     | DNA          | anterior              |
| GI_24475897-S | 320.1   | 475.3  | 457    | USF1      | <a href="#">NM_007122.2</a> | UEF;MLTF;FCHL1;MLTFI;HYPLIP1        | specific     | nucleus transcripti   |
| GI_24475949-S | 1912.4  | 1829.7 | 1863.8 | LAT       | <a href="#">NM_014387.2</a> |                                     | SH3/SH2      | integral to immune    |
| GI_24475953-S | 121.1   | 131.1  | 128    | TNPO2     | <a href="#">NM_013433.2</a> | IPO3;TRN2;KPNB2B;FLJ12155           | nuclear      | cytoplasm nucleocyto  |
| GI_24475957-S | 96      | 96.2   | 81.4   | PRO0297   | <a href="#">NM_014081.2</a> |                                     |              |                       |
| GI_24475961-S | 301.8   | 301.7  | 277.5  | LOC51058  | <a href="#">NM_015911.2</a> |                                     |              |                       |
| GI_24475963-S | 2578.6  | 2904.1 | 2599.3 | LOC51234  | <a href="#">NM_016454.2</a> |                                     |              |                       |
| GI_24475964-S | 100.9   | 95.7   | 89.7   | LOC51057  | <a href="#">NM_015910.2</a> |                                     |              |                       |
| GI_24475966-S | 117.8   | 152.3  | 131.6  | LOC51059  | <a href="#">NM_015912.2</a> |                                     |              |                       |
| GI_24475968-S | 186     | 217.9  | 191.8  | PACAP     | <a href="#">NM_016459.2</a> | FLJ32987                            |              |                       |
| GI_24475971-S | 2362.3  | 2124.7 | 1925.4 | LOC51249  | <a href="#">NM_016486.2</a> |                                     |              |                       |
| GI_24475975-S | 1258    | 1555.8 | 2174.6 | TBC1D7    | <a href="#">NM_016495.2</a> | dJ257A7.3                           |              |                       |
| GI_24475976-S | 470.1   | 491    | 397.5  | C6orf203  | <a href="#">NM_016487.2</a> | PRED31;HSPC230                      |              |                       |
| GI_24475978-S | 3592.1  | 3731.9 | 3331.5 | LOC51255  | <a href="#">NM_016494.2</a> |                                     |              |                       |
| GI_24475981-S | 1128.4  | 1168.6 | 1168.5 | HSPC196   | <a href="#">NM_016464.2</a> |                                     |              |                       |
| GI_24475982-A | 1585.8  | 1013.9 | 1099.1 | FLJ10597  | <a href="#">NM_016501.2</a> |                                     |              |                       |
| GI_24475984-S | 4600    | 4471.4 | 4222.9 | C6orf53   | <a href="#">NM_016462.2</a> | HSPC194;bA421M1.6                   | molecular    | integral to           |
| GI_24475985-S | 840.6   | 805.2  | 865.7  | HSPC242   | <a href="#">NM_016498.2</a> |                                     |              |                       |
| GI_24475986-S | 247.3   | 318.7  | 310.1  | C14orf129 | <a href="#">NM_016472.2</a> | HSPC210                             |              |                       |
| GI_24475987-S | 1436.2  | 919.9  | 782.8  | ZNF581    | <a href="#">NM_016535.2</a> | HSPC189                             | DNA          | nucleus regulation    |
| GI_24475997-S | 4674.3  | 3564.9 | 3070.1 | H41       | <a href="#">NM_017548.2</a> |                                     | molecular    | cellular_co cell      |
| GI_24476001-S | 895.9   | 659    | 1752.9 | HSCARG    | <a href="#">NM_020677.2</a> |                                     |              |                       |
| GI_24476003-S | 107.2   | 109.9  | 104.3  | CYT19     | <a href="#">NM_020682.2</a> |                                     | S-           |                       |
| GI_24476006-S | 84      | 92     | 92     | HT017     | <a href="#">NM_020678.2</a> |                                     |              |                       |
| GI_24476008-S | 697.2   | 924.7  | 973.5  | NPD007    | <a href="#">NM_020684.2</a> |                                     |              |                       |
| GI_24476015-I | 152     | 161.8  | 130.8  | GPR161    | <a href="#">NM_153832.1</a> | RE2                                 |              |                       |
| GI_24496766-S | 5797.4  | 6086   | 7776.8 | HGS       | <a href="#">NM_004712.3</a> | HRS;ZFYVE8                          |              | endosome negative     |
| GI_24496784-I | 137.8   | 158.6  | 139.5  | AF15Q14   | <a href="#">NM_170589.1</a> |                                     |              |                       |
| GI_24496788-S | 1502.1  | 1199.2 | 989.9  | LARS      | <a href="#">NM_020117.8</a> | LEUS;LARS1;RNTLS;HSPC192;FLJ10595;F |              |                       |
| GI_24497434-S | 6716.2  | 7409.6 | 6380.4 | PSMC5     | <a href="#">NM_002805.4</a> | S8;P45;SUG1;TBP10;TRIP1;p45/SUG     | proteasom    | 26S transcripti       |
| GI_24497436-I | 89.1    | 82.6   | 83.4   | SIGLECL1  | <a href="#">NM_053003.2</a> | S2V;SLG;FLJ38600                    | lectin [goid | integral to cell      |
| GI_24497437-S | 208.3   | 236.2  | 202.7  | IL12B     | <a href="#">NM_002187.2</a> | CLMF;NKSF;CLMF2;NKSF2;IL-12B        | interleukin- | membran JAK-STAT      |
| GI_24497439-A | 111.5   | 121.9  | 98.6   | IL12RB1   | <a href="#">NM_153701.1</a> | IL12RB;MGC34454;IL-12R-BETA1        | interleukin  | integral to positive  |
| GI_24497439-I | 193.9   | 222.4  | 184.4  | IL12RB1   | <a href="#">NM_153701.1</a> | IL12RB;MGC34454;IL-12R-BETA1        | interleukin  | integral to positive  |
| GI_24497441-S | 96.7    | 91.9   | 95.9   | IL12RB2   | <a href="#">NM_001559.2</a> |                                     | interleukin  | integral to positive  |
| GI_24497442-S | 603.7   | 553.9  | 549.2  | NUP214    | <a href="#">NM_005085.2</a> | CAN;CAIN;N214;D9S46E                | transporte   | nuclear nucleocyto    |
| GI_24497446-A | 221.6   | 293.6  | 202.5  | NUP50     | <a href="#">NM_153645.1</a> | NPAP60;NPAP60L;MGC39961;DKFZP564A0  |              | nuclear               |



|               |        |        |        |          |                             |                                    |             |             |             |
|---------------|--------|--------|--------|----------|-----------------------------|------------------------------------|-------------|-------------|-------------|
| GI_24497446-I | 103.7  | 99.5   | 90.4   | NUP50    | <a href="#">NM_153645.1</a> | NPAP60;NPAP60L;MGC39961;DKFZP564A0 | nuclear     |             |             |
| GI_24497452-S | 2258.4 | 2128   | 2048.8 | NUP88    | <a href="#">NM_002532.3</a> | MGC8530                            | transporte  | nuclear     | nucleocyto  |
| GI_24497454-S | 116.3  | 126.7  | 105    | KCNC1    | <a href="#">NM_004976.2</a> | KV4;NGK2;KV3.1                     | voltage-    | voltage-    | potassium   |
| GI_24497455-A | 97.2   | 85.8   | 90.2   | KCNC2    | <a href="#">NM_139137.2</a> | KV3.2                              |             |             |             |
| GI_24497455-I | 107.8  | 135.6  | 129.5  | KCNC2    | <a href="#">NM_139137.2</a> | KV3.2                              |             |             |             |
| GI_24497459-S | 117.7  | 114.8  | 108    | KCNC3    | <a href="#">NM_004977.2</a> | KV3.3;KSHIID                       | voltage-    | voltage-    | potassium   |
| GI_24497461-I | 218.8  | 262.1  | 237.9  | KCNC4    | <a href="#">NM_004978.2</a> | KV3.4;KSHIIC;HKSHIIC               | potassium   | voltage-    | potassium   |
| GI_24497463-A | 93     | 94.2   | 104.9  | KCNC4    | <a href="#">NM_153763.1</a> | KV3.4;KSHIIC;HKSHIIC               | potassium   | voltage-    | potassium   |
| GI_24497463-I | 140.4  | 132.6  | 130.7  | KCNC4    | <a href="#">NM_153763.1</a> | KV3.4;KSHIIC;HKSHIIC               | potassium   | voltage-    | potassium   |
| GI_24497465-A | 104.9  | 116.1  | 98.1   | KCNJ1    | <a href="#">NM_000220.2</a> | ROMK;ROMK1;KIR1.1                  | inward      | voltage-    | potassium   |
| GI_24497465-I | 126.8  | 146.8  | 138.7  | KCNJ1    | <a href="#">NM_000220.2</a> | ROMK;ROMK1;KIR1.1                  | inward      | voltage-    | potassium   |
| GI_24497477-A | 103.2  | 94.7   | 104    | SLC22A6  | <a href="#">NM_153277.1</a> | OAT1;PAHT;HOAT1;ROAT1;MGC45260     | organic     | membran     | alpha-      |
| GI_24497483-S | 135.4  | 140.9  | 136.8  | SLC22A11 | <a href="#">NM_018484.2</a> | OAT4;hOAT4;MGC34282                | sodium-     | integral to | small       |
| GI_24497484-I | 367.6  | 475.7  | 418.3  | SLC22A12 | <a href="#">NM_144585.2</a> | RST;OAT4L;URAT1                    | transporte  | integral to | transport   |
| GI_24497486-A | 575.3  | 726.7  | 704.8  | SLC22A12 | <a href="#">NM_153378.1</a> | RST;OAT4L;URAT1                    | transporte  | integral to | transport   |
| GI_24497488-S | 103.9  | 122.8  | 98.4   | SLC22A3  | <a href="#">NM_021977.2</a> | EMT;EMTH;OCT3                      | organic     | membran     | organic     |
| GI_24497489-S | 186.1  | 216.6  | 407.5  | SLC22A4  | <a href="#">NM_003059.2</a> | OCTN1;MGC34546                     | organic     | integral to | organic     |
| GI_24497491-S | 166    | 176.2  | 175.4  | SLC22A5  | <a href="#">NM_003060.2</a> | OCTN2                              | carnitine   | integral to | carnitine   |
| GI_24497492-S | 317.4  | 325    | 346    | HOXA4    | <a href="#">NM_002141.2</a> | HOX1D                              | transcripti | nucleus     | embryoge    |
| GI_24497494-I | 153    | 156.5  | 145.6  | SLC22A7  | <a href="#">NM_153320.1</a> | NLT;OAT2;MGC24091;MGC45202         | sodium-     | membran     | organic     |
| GI_24497496-A | 384.2  | 454    | 393.6  | SLC22A7  | <a href="#">NM_006672.2</a> | NLT;OAT2;MGC24091;MGC45202         | sodium-     | membran     | organic     |
| GI_24497498-S | 339.5  | 449.8  | 384.8  | SLC22A8  | <a href="#">NM_004254.2</a> | OAT3;MGC24086                      | organic     | membran     | organic     |
| GI_24497500-S | 164    | 133.8  | 187.5  | FOXA1    | <a href="#">NM_004496.2</a> | HNF3A;TCF3A;MGC33105               | transcripti | nucleus     | regulation  |
| GI_24497502-I | 113.6  | 107.6  | 105.7  | FOXA2    | <a href="#">NM_021784.3</a> | HNF3B;TCF3B;MGC19807               | transcripti | nucleus     | regulation  |
| GI_24497503-A | 155.1  | 154    | 123.2  | FOXA2    | <a href="#">NM_153675.1</a> | HNF3B;TCF3B;MGC19807               | transcripti | nucleus     | regulation  |
| GI_24497503-I | 81     | 93.3   | 95.1   | FOXA2    | <a href="#">NM_153675.1</a> | HNF3B;TCF3B;MGC19807               | transcripti | nucleus     | regulation  |
| GI_24497505-S | 168.1  | 193.7  | 131.3  | FOXA3    | <a href="#">NM_004497.2</a> | FKHH3;HNF3G;TCF3G;MGC10179         | specific    | nucleus     | regulation  |
| GI_24497507-I | 111.9  | 119.3  | 119.3  | HOXA1    | <a href="#">NM_005522.3</a> | HOX1F;MGC45232                     | RNA         | nucleus     | developm    |
| GI_24497508-A | 100.8  | 113.7  | 109.7  | HOXA1    | <a href="#">NM_153620.1</a> | HOX1F;MGC45232                     | RNA         | nucleus     | developm    |
| GI_24497511-I | 99.5   | 111.9  | 98.5   | HOXA3    | <a href="#">NM_030661.3</a> | HOX1E;MGC10155                     | transcripti | nucleus     | regulation  |
| GI_24497512-I | 103.6  | 105.6  | 96.5   | HOXA3    | <a href="#">NM_153631.1</a> | HOX1E;MGC10155                     | transcripti | nucleus     | regulation  |
| GI_24497514-A | 101    | 109    | 98.3   | HOXA3    | <a href="#">NM_153632.1</a> | HOX1E;MGC10155                     | transcripti | nucleus     | regulation  |
| GI_24497514-I | 97.9   | 101.7  | 98     | HOXA3    | <a href="#">NM_153632.1</a> | HOX1E;MGC10155                     | transcripti | nucleus     | regulation  |
| GI_24497516-S | 593.6  | 794.5  | 697.3  | HOXA5    | <a href="#">NM_019102.2</a> | HOX1C;HOX1.3;MGC9376               | transcripti | nucleus     | regulation  |
| GI_24497518-S | 251.3  | 228.8  | 200.8  | MAN1A1   | <a href="#">NM_005907.2</a> | MAN9;HUMM3;HUMM9                   | mannosid    | Golgi       | protein     |
| GI_24497520-S | 584    | 629.2  | 646.5  | MAP2K4   | <a href="#">NM_003010.2</a> | JNKK;MEK4;MKK4;SEK1;JNKK1;SERK1;MA | protein     |             | JNK         |
| GI_24497521-I | 219.9  | 245.1  | 302.2  | MAP3K6   | <a href="#">NM_004672.2</a> | MAPKKK6;MGC20114                   | MAP         |             | activation  |
| GI_24497523-A | 340.8  | 295.6  | 414.1  | MAP3K6   | <a href="#">NM_145319.1</a> | MAPKKK6;MGC20114                   | MAP         |             | activation  |
| GI_24497525-S | 269.9  | 313.2  | 282.4  | HOXB1    | <a href="#">NM_002144.2</a> | HOX2;HOX2I;Hox-2.9                 | transcripti | nucleus     | regulation  |
| GI_24497527-S | 1134   | 957.4  | 786.3  | HOXB2    | <a href="#">NM_002145.2</a> | K8;HOX2;HOX2H;Hox-2.8              | transcripti |             | circulation |
| GI_24497529-I | 863.6  | 1183.9 | 1243.8 | EVC      | <a href="#">NM_014556.2</a> | DWF-1                              |             | integral to | muscle      |
| GI_24497530-A | 145.1  | 162.8  | 152.9  | EVC      | <a href="#">NM_153717.1</a> | DWF-1                              |             | integral to | muscle      |
| GI_24497530-I | 119.3  | 111.3  | 121.6  | EVC      | <a href="#">NM_153717.1</a> | DWF-1                              |             | integral to | muscle      |
| GI_24497532-S | 371    | 480.4  | 437    | HOXC10   | <a href="#">NM_017409.2</a> | HOX3I;MGC5259                      | RNA         | nucleus     | positive    |

|               |        |        |        |          |                             |                                     |             |              |              |
|---------------|--------|--------|--------|----------|-----------------------------|-------------------------------------|-------------|--------------|--------------|
| GI_24497534-S | 102.2  | 122.2  | 105.4  | HOXC11   | <a href="#">NM_014212.2</a> | HOX3H;MGC4906                       | RNA         | nucleus      | endoderm     |
| GI_24497535-S | 314    | 436.4  | 454    | HOXC13   | <a href="#">NM_017410.2</a> | HOX3;HOX3G                          | RNA         | nucleus      | embryoge     |
| GI_24497537-I | 171.6  | 193.8  | 167.4  | HOXC4    | <a href="#">NM_014620.2</a> | HOX3;cp19;HOX3E                     | transcripti | nucleus      | regulation   |
| GI_24497539-A | 114.4  | 119.5  | 110.4  | HOXC4    | <a href="#">NM_153633.1</a> | HOX3;cp19;HOX3E                     | transcripti | nucleus      | regulation   |
| GI_24497541-S | 290.9  | 331    | 416.6  | HOXC5    | <a href="#">NM_018953.2</a> | CP11;HOX3;HOX3D                     | transcripti | nucleus      | regulation   |
| GI_24497542-A | 872.1  | 868.2  | 1028.7 | HOXC6    | <a href="#">NM_004503.2</a> | CP25;HOX3;HOX3C;HHO.C8              | transcripti | nucleus      | oncogene     |
| GI_24497542-I | 216.7  | 265.2  | 250.1  | HOXC6    | <a href="#">NM_004503.2</a> | CP25;HOX3;HOX3C;HHO.C8              | transcripti | nucleus      | oncogene     |
| GI_24497546-S | 169.5  | 205.4  | 205.2  | HOXC9    | <a href="#">NM_006897.1</a> | HOX3;HOX3B                          | transcripti | nucleus      | transcripti  |
| GI_24497548-I | 338.8  | 430.8  | 416.2  | HOXA10   | <a href="#">NM_018951.2</a> | PL;HOX1H;HOX1.8;MGC12859            | transcripti | nucleus      | spermatog    |
| GI_24497550-A | 615.8  | 708.8  | 891.5  | HOXA10   | <a href="#">NM_153715.1</a> | PL;HOX1H;HOX1.8;MGC12859            | transcripti | nucleus      | spermatog    |
| GI_24497550-I | 116.1  | 142.7  | 134.3  | HOXA10   | <a href="#">NM_153715.1</a> | PL;HOX1H;HOX1.8;MGC12859            | transcripti | nucleus      | spermatog    |
| GI_24497552-S | 187.1  | 222.8  | 179.5  | HOXA11   | <a href="#">NM_005523.4</a> | HOX1I                               | transcripti | nucleus      | embryoge     |
| GI_24497553-S | 118.4  | 140.4  | 120.9  | HOXA13   | <a href="#">NM_000522.2</a> | HOX1J                               | DNA         | nucleus      | skeletal     |
| GI_24497555-S | 123.9  | 143.1  | 126.2  | HOXA7    | <a href="#">NM_006896.2</a> | ANTP;HOX1A;HOX1.1                   | transcripti | nucleus      | regulation   |
| GI_24497557-I | 131.2  | 176.6  | 172.2  | HOXA9    | <a href="#">NM_152739.2</a> | ABD-B;HOX1G;HOX1.7;MGC1934          |             |              | oncogene     |
| GI_24497558-A | 860.4  | 1360.9 | 1748.5 | HOXA9    | <a href="#">NM_002142.3</a> | ABD-B;HOX1G;HOX1.7;MGC1934          |             |              | oncogene     |
| GI_24497560-I | 104.2  | 122.3  | 112.4  | HYAL1    | <a href="#">NM_007312.3</a> | NAT6;LUCA1;HYAL-1;MGC45987          | hyalurono   | lysosome     |              |
| GI_24497563-I | 97.7   | 96.1   | 93.4   | HYAL1    | <a href="#">NM_153281.1</a> | NAT6;LUCA1;HYAL-1;MGC45987          | hyalurono   | lysosome     |              |
| GI_24497573-A | 174.6  | 218.8  | 183    | HYAL1    | <a href="#">NM_153286.1</a> | NAT6;LUCA1;HYAL-1;MGC45987          | hyalurono   | lysosome     |              |
| GI_24497575-I | 143.8  | 133.3  | 124.8  | AKR1A1   | <a href="#">NM_006066.2</a> | ALR;ALDR1;MGC1380;MGC12529          | aldehyde    |              | aldehyde     |
| GI_24497576-A | 4323.2 | 3687.3 | 2620.7 | AKR1A1   | <a href="#">NM_153326.1</a> | ALR;ALDR1;MGC1380;MGC12529          | aldehyde    |              | aldehyde     |
| GI_24497578-S | 105.7  | 379.1  | 182.2  | AKR1B10  | <a href="#">NM_020299.3</a> | HIS;HSI;ARL1;ARL-                   | aldehyde    | cellular_co  | aldehyde     |
| GI_24497579-S | 3069.1 | 4654.1 | 4711   | AKR1B1   | <a href="#">NM_001628.2</a> | AR;ADR;ALDR1;MGC1804                | aldehyde    | extracellul  | carbohydr    |
| GI_24497580-S | 154.2  | 299.1  | 491.2  | AKR1C1   | <a href="#">NM_001353.4</a> | C9;DD1;DDH;DDH1;H-                  | aldo-keto   | cytoplasm    | xenobiotic   |
| GI_24497582-S | 345.4  | 872.3  | 1214.3 | AKR1C3   | <a href="#">NM_003739.4</a> | DD3;HAKRB;HAKRe;HA1753;HSD17B5;hluP | aldo-keto   |              | prostaglan   |
| GI_24497584-S | 110.9  | 162.9  | 160.6  | AKR1C4   | <a href="#">NM_001818.2</a> | C11;CDR;DD4;CHDR;HAKRA;MGC22581;3-  | aldo-keto   | cytoplasm    | androgen     |
| GI_24497586-S | 96.9   | 102    | 105.8  | ADCY4    | <a href="#">NM_139247.2</a> |                                     | calcium/ca  | integral to  | intracellula |
| GI_24497588-S | 103.7  | 99.5   | 121.3  | ARX      | <a href="#">NM_139058.1</a> | ISSX;PRTS;MRX36;MRXS1               | transcripti | nucleus      | regulation   |
| GI_24497590-I | 165.3  | 154.5  | 167.9  | DPM2     | <a href="#">NM_152690.1</a> | MGC21559                            |             | endoplas     | protein      |
| GI_24497592-I | 1942.8 | 2222.9 | 2276.5 | EDF1     | <a href="#">NM_003792.2</a> | MBF1;EDF-1;MGC9058                  | DNA         | intracellula | cell growth  |
| GI_24497593-A | 2684.4 | 2536.6 | 2783.8 | DPM2     | <a href="#">NM_003863.2</a> | MGC21559                            |             | endoplas     | protein      |
| GI_24497594-I | 274.6  | 300.8  | 287.2  | DSCR5    | <a href="#">NM_016430.2</a> | DCRC;DSRC;PIGP;DCRC-S               | molecular   | integral to  | biological_  |
| GI_24497596-I | 117.5  | 119    | 114.4  | DSCR5    | <a href="#">NM_153681.1</a> | DCRC;DSRC;PIGP;DCRC-S               | molecular   | integral to  | biological_  |
| GI_24497598-A | 1061   | 1233.6 | 1156.6 | DSCR5    | <a href="#">NM_153682.1</a> | DCRC;DSRC;PIGP;DCRC-S               | molecular   | integral to  | biological_  |
| GI_24497600-A | 2998.9 | 3238.6 | 3322.5 | EDF1     | <a href="#">NM_153200.1</a> | MBF1;EDF-1;MGC9058                  | DNA         | intracellula | cell growth  |
| GI_24497600-I | 95     | 107.6  | 97.3   | EDF1     | <a href="#">NM_153200.1</a> | MBF1;EDF-1;MGC9058                  | DNA         | intracellula | cell growth  |
| GI_24497610-S | 571.3  | 711.5  | 639    | E VX1    | <a href="#">NM_001989.2</a> |                                     | transcripti | nucleus      | regulation   |
| GI_24497611-S | 118.2  | 174    | 131.8  | KIAA1959 | <a href="#">NM_032873.2</a> | MGC15437                            | catalytic   |              | metabolis    |
| GI_24497613-A | 91.1   | 94.5   | 108.8  | KL       | <a href="#">NM_004795.2</a> |                                     | beta-       | soluble      |              |
| GI_24497617-S | 335.1  | 331.4  | 455    | PRO2000  | <a href="#">NM_014109.2</a> | MGC5254;MGC29843;DKFZp667N1320      | nucleotide  |              |              |
| GI_24497619-S | 1594.4 | 1785.9 | 1523.1 | SRP68    | <a href="#">NM_014230.2</a> |                                     | RNA         | signal       |              |
| GI_24497621-S | 674.1  | 548.7  | 565.7  | TRIM11   | <a href="#">NM_145214.2</a> | BIA1;RNF92                          |             |              |              |
| GI_24497622-S | 399.9  | 392    | 364.6  | TRIM38   | <a href="#">NM_006355.2</a> | RNF15;RORET;MGC8946                 | zinc ion    | intracellula | biological_  |
| GI_24497623-S | 96.5   | 109.3  | 83.8   | IRF6     | <a href="#">NM_006147.2</a> | LPS;PIT;PPS;VWS                     | transcripti | nucleus      | regulation   |

|               |        |        |        |          |                             |                                     |              |             |             |
|---------------|--------|--------|--------|----------|-----------------------------|-------------------------------------|--------------|-------------|-------------|
| GI_24497624-S | 103.1  | 117.1  | 118.2  | OTP      | <a href="#">NM_032109.2</a> | MGC3161                             |              |             |             |
| GI_24497625-S | 670.7  | 698.6  | 513.7  | SNAI2    | <a href="#">NM_003068.3</a> | SLUG;SLUGH1;MGC10182                | transcripti  | nucleus     | ectoderm/   |
| GI_24497626-A | 253.1  | 252.9  | 308.4  | SIPA1    | <a href="#">NM_006747.2</a> | SPA1;MGC17037                       | GTPase       | peripheral  | signal      |
| GI_24497628-I | 106.7  | 122.9  | 92.8   | SIPA1    | <a href="#">NM_153253.2</a> | SPA1;MGC17037                       | GTPase       | peripheral  | signal      |
| GI_24497630-S | 160.8  | 210.2  | 135.9  | RHBDL2   | <a href="#">NM_017821.2</a> | RRP2;FLJ20435;MGC16997              | serine-      | integral to |             |
| GI_24586652-I | 119.3  | 138.5  | 118.9  | MLL3     | <a href="#">NM_170606.1</a> | HALR;FLJ12625;KIAA1506              | methyltran   | nucleus     | regulation  |
| GI_24586660-S | 330    | 279.9  | 286    | ZNF271   | <a href="#">NM_006629.3</a> | HZF7;ZNFE8                          | zinc ion     |             |             |
| GI_24586662-S | 471.5  | 509.8  | 406.5  | DIP13B   | <a href="#">NM_018171.2</a> | FLJ10659                            |              |             |             |
| GI_24586664-S | 575.1  | 535.9  | 434.6  | SLC39A8  | <a href="#">NM_022154.4</a> | BIGM103                             | heavy        | membran     | heavy       |
| GI_24586672-A | 481.4  | 602    | 600.3  | SSH-3    | <a href="#">NM_018276.2</a> | SSH3;FLJ10928;FLJ20515              |              |             |             |
| GI_24586674-I | 159.9  | 181.6  | 171.2  | SSH-3    | <a href="#">NM_017857.2</a> | SSH3;FLJ10928;FLJ20515              |              |             |             |
| GI_24586683-A | 186.9  | 252.4  | 371.1  | DMN      | <a href="#">NM_015286.4</a> | SYN;KIAA0353                        | structural   | intermedia  |             |
| GI_24586685-S | 92.6   | 103.6  | 101.3  | CACNG8   | <a href="#">NM_031895.4</a> |                                     | voltage-     | voltage-    | calcium     |
| GI_24586687-S | 364.6  | 443    | 400.4  | ASB16    | <a href="#">NM_080863.4</a> | FLJ30165                            |              |             |             |
| GI_24638432-S | 6668.6 | 7845.2 | 6981.5 | NCSTN    | <a href="#">NM_015331.1</a> | APH2;KIAA0253                       | molecular    | integral to | proteolysis |
| GI_24638434-I | 80.6   | 84.4   | 81.2   | OTOA     | <a href="#">NM_144672.2</a> | DFNB22;FLJ32773                     |              |             |             |
| GI_24638451-A | 343.4  | 367    | 342.7  | OTOA     | <a href="#">NM_170664.1</a> | DFNB22;FLJ32773                     |              |             |             |
| GI_24638451-I | 262.6  | 158.4  | 164.3  | OTOA     | <a href="#">NM_170664.1</a> | DFNB22;FLJ32773                     |              |             |             |
| GI_24762231-S | 110.1  | 100.4  | 101.8  | BRUNOL5  | <a href="#">NM_021938.2</a> | CELF5;BRUNOL-5                      | nucleic      |             |             |
| GI_24762235-I | 407.8  | 462.6  | 430.4  | FLJ14936 | <a href="#">NM_032864.2</a> | MGC3320                             |              |             |             |
| GI_24762238-I | 139.3  | 160.1  | 159.6  | RASGRP3  | <a href="#">NM_170672.1</a> | GRP3;KIAA0846                       | guanyl-      |             | small       |
| GI_24762247-I | 277.6  | 318.7  | 293    | ITGB1BP3 | <a href="#">NM_170678.1</a> | MIBP                                | protein      | peripheral  | myoblast    |
| GI_24797064-S | 397.4  | 482.2  | 446.6  | ZNF212   | <a href="#">NM_012256.2</a> | MGC9707;ZNFC150;C2H2-150            |              |             |             |
| GI_24797066-S | 117.7  | 141.8  | 127.5  | HLA-A    | <a href="#">NM_002116.4</a> |                                     |              |             |             |
| GI_24797068-S | 138.4  | 152.6  | 129.9  | HLA-DQB1 | <a href="#">NM_002123.2</a> | IDDM1;CELIAC1;HLA-DQB               |              |             |             |
| GI_24797070-S | 759.5  | 670.7  | 517.1  | HLA-E    | <a href="#">NM_005516.3</a> | HLA-6.2                             | class I      | integral to | immune      |
| GI_24797072-S | 360.6  | 475.6  | 408.7  | HLA-G    | <a href="#">NM_002127.3</a> | TCA;HLA60;HLA-6.0                   | class I      | integral to | perception  |
| GI_24797073-S | 263    | 2740.5 | 504.6  | HLA-DPA1 | <a href="#">NM_033554.2</a> | HLADP;HLASB;HLA-DP1A                | MHC          | integral to | immune      |
| GI_24797075-S | 758.9  | 1773.5 | 319.6  | HLA-DPB1 | <a href="#">NM_002121.4</a> | HLA-DP1B                            | class II     |             | perception  |
| GI_24797083-S | 2280.5 | 2875.6 | 2710.8 | KPNA6    | <a href="#">NM_012316.3</a> | IPOA7;KPNA7;FLJ11249;MGC17918       | protein      | importin,   | NLS-        |
| GI_24797084-S | 5554.1 | 4735.2 | 4615.2 | KPNB1    | <a href="#">NM_002265.4</a> | IMB1;IPOB;Impnb;NTF97;MGC2155;MGC21 | nuclear      | importin,   | NLS-        |
| GI_24797085-S | 510.5  | 689.5  | 540.3  | KPNB3    | <a href="#">NM_002271.3</a> | IMB3;IPO5;RANBP5;MGC2068            | GTPase       | importin,   | NLS-        |
| GI_24797087-A | 351.9  | 369.9  | 376.1  | PEX10    | <a href="#">NM_002617.3</a> | NALD;RNF69;MGC1998                  | zinc ion     | peroxisom   | peroxisom   |
| GI_24797088-I | 116.1  | 128.7  | 126.4  | PEX10    | <a href="#">NM_153818.1</a> | NALD;RNF69;MGC1998                  | zinc ion     | peroxisom   | peroxisom   |
| GI_24797090-A | 376.5  | 371.6  | 457.3  | PHF2     | <a href="#">NM_024517.1</a> | GRC5;KIAA0662                       | transcripti  | nucleus     | regulation  |
| GI_24797092-I | 124.1  | 110.2  | 109    | PHF2     | <a href="#">NM_005392.2</a> | GRC5;KIAA0662                       | transcripti  | nucleus     | regulation  |
| GI_24797094-A | 2353.5 | 1362.1 | 1034.3 | PYCR1    | <a href="#">NM_153824.1</a> | P5C;P5CR;PYCR;PP222                 | pyrroline-5- |             | proline     |
| GI_24797096-I | 441.1  | 366    | 243.9  | PYCR1    | <a href="#">NM_006907.2</a> | P5C;P5CR;PYCR;PP222                 | pyrroline-5- |             | proline     |
| GI_24797098-I | 124.2  | 114.8  | 114.6  | RASGRF1  | <a href="#">NM_002891.3</a> | GNRP;GRF1;CDC25;GRF55;CDC25L;H-     | Ras          |             | signal      |
| GI_24797100-A | 123.6  | 146.5  | 122.4  | RASGRF1  | <a href="#">NM_153815.1</a> | GNRP;GRF1;CDC25;GRF55;CDC25L;H-     | Ras          |             | signal      |
| GI_24797100-I | 113.1  | 110.3  | 106.3  | RASGRF1  | <a href="#">NM_153815.1</a> | GNRP;GRF1;CDC25;GRF55;CDC25L;H-     | Ras          |             | signal      |
| GI_24797102-A | 215.1  | 268.8  | 251.1  | RASGRP2  | <a href="#">NM_153819.1</a> | CDC25L;CALDAG-GEFI                  | lipid        |             | signal      |
| GI_24797104-I | 2079   | 1486.6 | 1882.6 | EPHB2    | <a href="#">NM_004442.4</a> | DRT;ERK;Hek5;EPHT3;Tyro5            | transmem     | integral to | oncogene    |
| GI_24797105-S | 3963.4 | 3840.4 | 2820.2 | ETEA     | <a href="#">NM_014613.1</a> | KIAA0887                            |              |             |             |

|               |        |        |        |          |                             |                                     |             |             |             |
|---------------|--------|--------|--------|----------|-----------------------------|-------------------------------------|-------------|-------------|-------------|
| GI_24797117-A | 113.7  | 114.3  | 110.1  | CABYR    | <a href="#">NM_153770.1</a> | CBP86;FSP-2;MGC9117                 |             |             |             |
| GI_24797131-S | 1218.9 | 1380.6 | 1192.4 | HOXA6    | <a href="#">NM_024014.2</a> | HOX1B;HOX1.2                        | transcripti | nucleus     | regulation  |
| GI_24797132-S | 276.2  | 285.6  | 206.8  | HOXB5    | <a href="#">NM_002147.2</a> | HOX2;HU-1;HOX2A;Hox2.1;HHO.C10      | transcripti | nucleus     | embryoge    |
| GI_24797133-I | 130.2  | 125.3  | 118.1  | HOXB6    | <a href="#">NM_018952.3</a> | HOX2;HU-2;HOX2B;Hox-2.2             | transcripti | nucleus     | determinat  |
| GI_24797134-I | 141.5  | 143.1  | 139.5  | HOXB6    | <a href="#">NM_156036.1</a> | HOX2;HU-2;HOX2B;Hox-2.2             | transcripti | nucleus     | determinat  |
| GI_24797136-A | 363    | 393.7  | 306.1  | HOXB6    | <a href="#">NM_156037.1</a> | HOX2;HU-2;HOX2B;Hox-2.2             | transcripti | nucleus     | determinat  |
| GI_24797138-S | 2295.1 | 1638.5 | 1119.1 | HOXB9    | <a href="#">NM_024017.3</a> | HOX2;HOX2E;HOX-2.5                  | transcripti | nucleus     | transcripti |
| GI_24797139-S | 106.5  | 114.8  | 111.4  | KCNJ3    | <a href="#">NM_002239.2</a> | GIRK1;KIR3.1                        | G-protein   | voltage-    | potassium   |
| GI_24797140-S | 101.4  | 111.5  | 103.2  | KCNJ5    | <a href="#">NM_000890.3</a> | CIR;GIRK4;KATP1;KIR3.4              | G-protein   | voltage-    | potassium   |
| GI_24797146-S | 1105.7 | 749.5  | 702.4  | SEPHS2   | <a href="#">NM_012248.2</a> | SPS2                                | ATP         | cellular_co | selenocyst  |
| GI_24797149-S | 176.3  | 205.7  | 193.3  | BMP5     | <a href="#">NM_021073.2</a> | MGC34244                            | cytokine    | cellular_co | skeletal    |
| GI_24797150-S | 126    | 129.6  | 133.3  | DMGDH    | <a href="#">NM_013391.2</a> | DMGDHD;ME2GLYDH                     | electron    | mitochond   | electron    |
| GI_24797152-S | 431.4  | 377.2  | 401.6  | FGD1     | <a href="#">NM_004463.2</a> | AAS;FGDY;ZFYVE3                     | guanyl-     |             | histogene   |
| GI_24797154-A | 739.5  | 905.7  | 835.3  | ICMT     | <a href="#">NM_012405.2</a> | PCMT;PPMT;PCCMT;HSTE14;MST098;MST   | C-terminal  | membran     | C-terminal  |
| GI_24797155-I | 117.7  | 142.3  | 136.8  | ICMT     | <a href="#">NM_170705.1</a> | PCMT;PPMT;PCCMT;HSTE14;MST098;MST   | C-terminal  | membran     | C-terminal  |
| GI_24797157-S | 851.3  | 822.1  | 668.5  | MANBA    | <a href="#">NM_005908.2</a> | MANB1                               | beta-       | lysosome    | protein     |
| GI_24797159-S | 954.6  | 1421.4 | 1267.2 | TAP1     | <a href="#">NM_000593.4</a> | APT1;PSF1;ABC17;ABCB2;RING4;D6S114E | peptide     | membran     | peptide     |
| GI_24850106-S | 135.1  | 142.5  | 126.3  | RUFY2    | <a href="#">NM_017987.2</a> | RABIP4R;ZFYVE13;FLJ10063;KIAA1537   |             |             |             |
| GI_24850108-S | 131.3  | 129.2  | 132.5  | GPBAR1   | <a href="#">NM_170699.1</a> | BG37;GPCR;TGR5;GPR131               | receptor    | integral to | G-protein   |
| GI_24850110-S | 159.4  | 334.7  | 198.4  | PSTPIP2  | <a href="#">NM_024430.2</a> | MAYP;MGC34175                       |             | kinesin     |             |
| GI_24850112-S | 4444.3 | 5313.4 | 4825.1 | SHCBP1   | <a href="#">NM_024745.2</a> | FLJ22009;MGC26900                   |             |             |             |
| GI_24850114-I | 444.9  | 584.9  | 545.7  | CSE-C    | <a href="#">NM_170601.1</a> |                                     |             |             |             |
| GI_24850132-S | 1071   | 1098.9 | 1284.1 | PIASY    | <a href="#">NM_015897.2</a> | MGC35296                            | zinc ion    | nucleus     | regulation  |
| GI_24850455-S | 121.6  | 123.8  | 111.1  | SMC5L1   | <a href="#">NM_015110.1</a> | SMC5;KIAA0594                       | ATP         | nucleus     | chromoso    |
| GI_24942125-S | 6535.5 | 5421.2 | 4147.3 | SHMT2    | <a href="#">NM_005412.3</a> | GLYA;SHMT                           |             | mitochond   |             |
| GI_25006531-S | 298.2  | 302.1  | 254.3  | SERHL    | <a href="#">NM_170694.1</a> | HS126B42;BK126B4.1;BK126B4.2        |             |             |             |
| GI_25014087-S | 119.4  | 130.9  | 137.5  | SLC34A3  | <a href="#">NM_080877.1</a> | NPTIIC;FLJ38680                     | sodium-     | membran     | phosphate   |
| GI_25014092-S | 248.3  | 251.6  | 203    | ZNF585B  | <a href="#">NM_152279.2</a> | SZFP41;FLJ14928                     | nucleic     | nucleus     | regulation  |
| GI_25014098-S | 957.1  | 1130.4 | 955    | SELK     | <a href="#">NM_021237.2</a> | HSPC030                             |             |             |             |
| GI_25014108-S | 5402.5 | 4606.2 | 3666.1 | SELH     | <a href="#">NM_170746.1</a> |                                     | DNA         | nucleus     | regulation  |
| GI_25014110-S | 1367.3 | 2594.5 | 2206   | DNAJB11  | <a href="#">NM_016306.3</a> | EDJ;HEDJ;ABBP2;ABBP-2               | chaperone   | endoplas    | protein     |
| GI_25072198-S | 627.7  | 487    | 514.9  | FLJ25416 | <a href="#">NM_145018.2</a> | FLJ13936                            |             |             |             |
| GI_25092600-S | 356.2  | 282.8  | 358.4  | STEAP2   | <a href="#">NM_152999.2</a> | STMP;IPCA1;IPCA-1;STAMP1;PCANAP1    |             | integral to | electron    |
| GI_25092657-S | 2527.9 | 1767.5 | 2396.8 | C7orf27  | <a href="#">NM_152743.1</a> | MGC22916                            |             |             |             |
| GI_25092724-S | 345.1  | 372.9  | 314.2  | CGI-96   | <a href="#">NM_015703.2</a> | BK126B4.3                           | nucleic     |             |             |
| GI_25121934-A | 176.9  | 210.8  | 175.8  | RASAL2   | <a href="#">NM_004841.2</a> | nGAP                                | Ras         |             | signal      |
| GI_25121935-A | 222.4  | 278.3  | 226    | RASAL2   | <a href="#">NM_170692.1</a> | nGAP                                | Ras         |             | signal      |
| GI_25121935-I | 179.6  | 213.6  | 164.9  | RASAL2   | <a href="#">NM_170692.1</a> | nGAP                                | Ras         |             | signal      |
| GI_25121937-I | 125.8  | 137.6  | 109.5  | GRLF1    | <a href="#">NM_024342.1</a> | GRF-1;P190A;P190-                   | transcripti | nucleus     | transcripti |
| GI_25121939-A | 1093.1 | 1232.1 | 1089.6 | GRLF1    | <a href="#">NM_004491.2</a> | GRF-1;P190A;P190-                   | transcripti | nucleus     | transcripti |
| GI_25121957-I | 146    | 149.8  | 135    | PSMD4    | <a href="#">NM_153822.1</a> | AF;ASF;S5A;AF-1;MCB1;Rpn10;pUB-R5   |             | 26S         |             |
| GI_25121959-S | 150.2  | 163.1  | 156.3  | PTCH     | <a href="#">NM_000264.2</a> | PTC;BCNS;HPE7;PTC1;NBCCS            | tumor       | integral to | embryoge    |
| GI_25121960-S | 126.8  | 148.3  | 120.9  | HOXB3    | <a href="#">NM_002146.3</a> | HOX2;HOX2G;Hox-2.7                  | transcripti | nucleus     | regulation  |
| GI_25121962-S | 855.8  | 723.3  | 867.8  | HOXB7    | <a href="#">NM_004502.2</a> | HOX2;HOX2C;HHO.C1;Hox-2.3           | transcripti | nucleus     | regulation  |

|               |         |        |        |           |                             |                                       |             |             |               |
|---------------|---------|--------|--------|-----------|-----------------------------|---------------------------------------|-------------|-------------|---------------|
| GI_25121964-S | 782.5   | 753.5  | 497.6  | HOXB8     | <a href="#">NM_024016.2</a> | HOX2;HOX2D;Hox-2.4                    | transcripti | nucleus     | regulation    |
| GI_25121965-S | 212     | 242.1  | 225    | KCNJ10    | <a href="#">NM_002241.2</a> | KIR1.2;KIR4.1;BIRK-10;KCNJ13-PEN      | ATP-        | integral to | potassium     |
| GI_25121967-S | 115     | 193.3  | 120.1  | KCNJ6     | <a href="#">NM_002240.2</a> | BIR1;GIRK2;KATP2;KCNJ7;KIR3.2;hiGIRK2 | G-protein   | voltage-    | potassium     |
| GI_25121968-S | 119.4   | 135.2  | 127.5  | KCNJ8     | <a href="#">NM_004982.2</a> | KIR6.1;uKATP-1                        | inward      | voltage-    | potassium     |
| GI_25121969-S | 105.8   | 113.3  | 109.6  | KCNJ9     | <a href="#">NM_004983.2</a> | GIRK3;KIR3.3                          | inward      | integral to | potassium     |
| GI_25121973-S | 260.8   | 290.3  | 267.6  | LOC151835 | <a href="#">NM_153635.1</a> |                                       |             |             |               |
| GI_25121977-S | 122.6   | 114.5  | 125.2  | DAZL      | <a href="#">NM_001351.2</a> | DAZH;DAZL1;DAZLA;SPGYLA;MGC26406      | RNA         | cytoplasm   | germ-cell     |
| GI_25121979-S | 683.2   | 890.2  | 721.4  | DISP2     | <a href="#">NM_033510.1</a> | DISPB;HsT16908;KIAA1742               |             |             |               |
| GI_25121981-I | 118.6   | 115.9  | 119.7  | CRISP1    | <a href="#">NM_001131.2</a> | ARP;AEGL1;HUMARP;CRISP-               |             | extracellul | fusion of     |
| GI_25121983-A | 114.8   | 89     | 102.3  | CRISP1    | <a href="#">NM_170609.1</a> | ARP;AEGL1;HUMARP;CRISP-               |             | extracellul | fusion of     |
| GI_25121985-S | 250.4   | 290.4  | 216.5  | BAPX1     | <a href="#">NM_001189.2</a> | NKX3B;NKX3-2;NKX3.2                   | RNA         | nucleus     | skeletal      |
| GI_25121986-S | 213.4   | 247.4  | 298.4  | BRRN1     | <a href="#">NM_015341.2</a> | HCAP-H;MGC4616                        |             | nucleus     | mitotic       |
| GI_25121988-S | 216.7   | 210.1  | 205    | MCSP      | <a href="#">NM_030663.2</a> | MCS;SMCP;MGC26305;MGC26519;HSMCS      | molecular   | mitochond   | fertilization |
| GI_25121990-S | 113.8   | 105.8  | 101.2  | MSI1      | <a href="#">NM_002442.2</a> |                                       | RNA         |             | neurogene     |
| GI_25121991-A | 124.6   | 140    | 154.6  | MSI2      | <a href="#">NM_138962.2</a> | MSI2H;MGC3245;FLJ36569                |             |             |               |
| GI_25121991-I | 266.5   | 313.5  | 279.4  | MSI2      | <a href="#">NM_138962.2</a> | MSI2H;MGC3245;FLJ36569                |             |             |               |
| GI_25121992-I | 124.5   | 142.7  | 219.2  | MSI2      | <a href="#">NM_170721.1</a> | MSI2H;MGC3245;FLJ36569                |             |             |               |
| GI_25141321-I | 124.9   | 116.8  | 111    | NMNAT2    | <a href="#">NM_015039.2</a> | PNAT2;PNAT-                           |             |             |               |
| GI_25141322-S | 151.5   | 173.5  | 151.8  | CPNE5     | <a href="#">NM_020939.1</a> | CPN5;COPN5;KIAA1599                   |             |             |               |
| GI_25141326-I | 116.3   | 124.4  | 101.8  | CPNE7     | <a href="#">NM_014427.3</a> | MGC34192                              | transporte  |             | lipid         |
| GI_25141327-A | 157.6   | 195.9  | 227.6  | CPNE7     | <a href="#">NM_153636.1</a> | MGC34192                              | transporte  |             | lipid         |
| GI_25168259-I | 144.1   | 166.9  | 154.2  | SGK2      | <a href="#">NM_016276.3</a> | H-SGK2;dJ138B7.2                      | protein     | cellular_co | protein       |
| GI_25168260-A | 96.9    | 102.6  | 91.8   | SGK2      | <a href="#">NM_170693.1</a> | H-SGK2;dJ138B7.2                      | protein     | cellular_co | protein       |
| GI_25168260-I | 106.6   | 106.3  | 109.9  | SGK2      | <a href="#">NM_170693.1</a> | H-SGK2;dJ138B7.2                      | protein     | cellular_co | protein       |
| GI_25168262-S | 2183.2  | 3332.6 | 1757.9 | SGK       | <a href="#">NM_005627.2</a> | SGK1                                  | protein     | nucleus     | sodium        |
| GI_25168264-I | 175.5   | 196.7  | 185.9  | SGKL      | <a href="#">NM_013257.3</a> | CISK;SGK2;SGK3                        | protein     |             | protein       |
| GI_25168266-A | 257.5   | 268.9  | 278.5  | SGKL      | <a href="#">NM_170709.1</a> | CISK;SGK2;SGK3                        | protein     |             | protein       |
| GI_25188178-S | 4082.4  | 3839.7 | 3828.8 | VDAC3     | <a href="#">NM_005662.3</a> | HD-VDAC3                              | voltage-    | mitochond   | adenine       |
| GI_25188180-S | 87.3    | 91.7   | 87.1   | WFDC13    | <a href="#">NM_172005.1</a> | WAP13;C20orf138;dJ601O1.3             |             |             |               |
| GI_25188188-S | 165.7   | 191.2  | 180.1  | HE9       | <a href="#">NM_172000.1</a> |                                       |             |             |               |
| GI_25188192-S | 105.3   | 142.4  | 132.1  | RAB39B    | <a href="#">NM_171998.1</a> |                                       | small       |             | small         |
| GI_25188194-S | 90.2    | 114.3  | 92.2   | SALL3     | <a href="#">NM_171999.1</a> |                                       | DNA         | nucleus     | developm      |
| GI_25188200-S | 91      | 85.2   | 81.6   | PLCZ1     | <a href="#">NM_033123.2</a> | NYD-SP27                              |             |             |               |
| GI_25282390-S | 1732.5  | 1381.1 | 1794.2 | NRM       | <a href="#">NM_007243.1</a> | NRM29                                 | molecular   | nuclear     | biological_   |
| GI_25282406-S | 831.8   | 1066.2 | 1090.9 | ISGF3G    | <a href="#">NM_006084.3</a> | p48;IRF9;IRF-9;ISGF3                  | transcripti | cytoplasm   | cell          |
| GI_25282468-S | 370.9   | 450.9  | 466.3  | RDH10     | <a href="#">NM_172037.1</a> |                                       | oxidoredu   |             | metabolis     |
| GI_25286702-S | 1140.4  | 1289.8 | 1438.2 | MGC33867  | <a href="#">NM_138346.1</a> | KIAA2013                              |             |             |               |
| GI_25306271-A | 954.6   | 966.2  | 934.6  | MRPL11    | <a href="#">NM_170738.1</a> | L11mt;CGI-113                         | structural  | ribosome    | protein       |
| GI_25306274-I | 202.3   | 191.8  | 179.9  | MRPL11    | <a href="#">NM_170739.1</a> | L11mt;CGI-113                         | structural  | ribosome    | protein       |
| GI_25306276-S | 1990    | 2441.6 | 2482.2 | EFG1      | <a href="#">NM_024996.5</a> | EFG;GFM;hEFG1;FLJ12662;FLJ13632;FLJ2  |             |             |               |
| GI_25306282-A | 192.9   | 213.6  | 191.7  | EFG2      | <a href="#">NM_170681.1</a> | hEFG2;MST027;FLJ21661                 |             |             |               |
| GI_25306282-I | 123.4   | 144.6  | 132    | EFG2      | <a href="#">NM_170681.1</a> | hEFG2;MST027;FLJ21661                 |             |             |               |
| GI_25453469-S | 48899.2 | 49381  | 39689  | EEF1A1    | <a href="#">NM_001402.4</a> | EF1A;PTI1;EEF-1;EEF1A;EF-Tu;PTI-      | GTP         | eukaryotic  | translation   |
| GI_25453470-S | 2655.9  | 2067.4 | 3098.3 | EEF1A2    | <a href="#">NM_001958.2</a> | HS1;STN;EF1A;EEF1AL;EF-1-alpha-2      | translation | cytoplasm   | translation   |

|               |         |        |        |          |                             |                                |             |             |             |
|---------------|---------|--------|--------|----------|-----------------------------|--------------------------------|-------------|-------------|-------------|
| GI_25453471-A | 27441.2 | 26581  | 24405  | EEF1D    | <a href="#">NM_001960.2</a> | EF-1D;FLJ20897                 | translation | eukaryotic  |             |
| GI_25453473-I | 142.2   | 150.3  | 143.1  | EEF1D    | <a href="#">NM_032378.2</a> | EF-1D;FLJ20897                 | translation | eukaryotic  |             |
| GI_25453475-S | 48869.8 | 40245  | 34548  | EEF1G    | <a href="#">NM_001404.3</a> | EF1G                           |             |             |             |
| GI_25453476-S | 22534.5 | 22381  | 19145  | EEF2     | <a href="#">NM_001961.2</a> | EF2;EEF-2                      | translation |             | translation |
| GI_25453477-S | 966.9   | 714.8  | 807.9  | EEF2K    | <a href="#">NM_013302.2</a> | EEF-2K;HSU93850;MGC45041       | translation | cytoplasm   | translation |
| GI_25453478-S | 124.1   | 134.3  | 137    | ENPP3    | <a href="#">NM_005021.2</a> | B10;NPP3;PDNP3;CD203c;PD-IBETA | phosphodi   | integral to | phosphate   |
| GI_25453479-I | 271.2   | 338.8  | 311.5  | CDY1     | <a href="#">NM_004680.2</a> | CDY                            | chromatin   | chromatin   | spermatog   |
| GI_25453480-A | 107.8   | 90.8   | 83     | CDY1     | <a href="#">NM_170723.1</a> | CDY                            | chromatin   | chromatin   | spermatog   |
| GI_25453480-I | 133     | 151.6  | 137.6  | CDY1     | <a href="#">NM_170723.1</a> | CDY                            | chromatin   | chromatin   | spermatog   |
| GI_25453482-S | 96.2    | 103.3  | 110.7  | CDY2     | <a href="#">NM_004825.2</a> | CDY                            | chromatin   | chromatin   | spermatog   |
| GI_25453483-S | 223.5   | 204    | 203.1  | COQ7     | <a href="#">NM_016138.3</a> | CAT5;CLK-1                     |             | mitochond   | ubiquinon   |
| GI_25470885-A | 828.7   | 883.5  | 727.5  | DAZAP1   | <a href="#">NM_018959.2</a> | MGC19907                       | RNA         |             | spermatog   |
| GI_25470889-I | 110.3   | 115.2  | 104.4  | DAZAP1   | <a href="#">NM_170711.1</a> | MGC19907                       | RNA         |             | spermatog   |
| GI_25777594-S | 217.4   | 251.7  | 261    | CLOCK    | <a href="#">NM_004898.2</a> | KIAA0334                       | transcripti | nucleus     | response    |
| GI_25777595-A | 491.1   | 545.6  | 460.2  | DGKD     | <a href="#">NM_003648.2</a> | dgkd-2;DGKdelta;KIAA0145       | diacylglyc  |             | signal      |
| GI_25777595-I | 93.1    | 94.4   | 83.9   | DGKD     | <a href="#">NM_003648.2</a> | dgkd-2;DGKdelta;KIAA0145       | diacylglyc  |             | signal      |
| GI_25777597-I | 198.4   | 207.4  | 177    | DGKD     | <a href="#">NM_152879.2</a> | dgkd-2;DGKdelta;KIAA0145       | diacylglyc  |             | signal      |
| GI_25777599-S | 1160    | 1939   | 1859.6 | PSMD1    | <a href="#">NM_002807.2</a> | S1;P112                        |             | proteasom   |             |
| GI_25777601-S | 1992.5  | 2433.2 | 2853.5 | PSMD2    | <a href="#">NM_002808.3</a> | S2;P97;TRAP2;MGC14274          |             | proteasom   |             |
| GI_25777603-I | 93.6    | 88.7   | 75.1   | FLJ12661 | <a href="#">NM_025138.2</a> | FLJ23780                       | oxidoredu   |             | metabolis   |
| GI_25777605-A | 764.1   | 661    | 370.3  | FLJ12661 | <a href="#">NM_170719.1</a> | FLJ23780                       | oxidoredu   |             | metabolis   |
| GI_25777607-I | 537.8   | 677.2  | 623.3  | NOD9     | <a href="#">NM_024618.2</a> | FLJ21478;MGC21025              |             |             |             |
| GI_25777609-A | 1176.8  | 1494.6 | 1669.5 | NOD9     | <a href="#">NM_170722.1</a> | FLJ21478;MGC21025              |             |             |             |
| GI_25777611-S | 402     | 511.5  | 482.7  | PSMD3    | <a href="#">NM_002809.2</a> | S3;P58;RPN3                    |             | 26S         |             |
| GI_25777613-S | 303     | 317.4  | 255.7  | PSMD5    | <a href="#">NM_005047.2</a> | S5B;KIAA0072;MGC23145          |             | 26S         |             |
| GI_25777616-I | 128.6   | 147.4  | 130.5  | CDYL     | <a href="#">NM_004824.2</a> | CDYL1;DKFZP586C1622            | chromatin   | nucleus     | spermatog   |
| GI_25777620-A | 1163.7  | 993.2  | 1103.7 | CDYL     | <a href="#">NM_170752.1</a> | CDYL1;DKFZP586C1622            | chromatin   | nucleus     | spermatog   |
| GI_25777625-A | 904     | 836.6  | 1206.3 | ABTB1    | <a href="#">NM_172028.1</a> | BPOZ;EF1ABP;MGC20585           |             |             |             |
| GI_25777627-A | 104.5   | 108.6  | 99.1   | KCNJ16   | <a href="#">NM_170741.1</a> | KIR5.1;MGC33717                | voltage-    | integral to | potassium   |
| GI_25777629-I | 92.9    | 113.3  | 109.4  | KCNJ16   | <a href="#">NM_170742.1</a> | KIR5.1;MGC33717                | voltage-    | integral to | potassium   |
| GI_25777631-S | 83.4    | 84.6   | 78.5   | KCNJ11   | <a href="#">NM_000525.2</a> | BIR;PHHI;IKATP;KIR6.2          | inward      | membran     | potassium   |
| GI_25777633-A | 119.2   | 113.1  | 113.2  | KCNJ14   | <a href="#">NM_013348.2</a> | IRK4;KIR2.4;MGC46111           | inward      | voltage-    | potassium   |
| GI_25777633-I | 158     | 169.4  | 129.6  | KCNJ14   | <a href="#">NM_013348.2</a> | IRK4;KIR2.4;MGC46111           | inward      | voltage-    | potassium   |
| GI_25777634-I | 241.6   | 247.4  | 243.5  | KCNJ14   | <a href="#">NM_170720.1</a> | IRK4;KIR2.4;MGC46111           | inward      | voltage-    | potassium   |
| GI_25777637-I | 181.4   | 242.2  | 211.6  | KCNJ15   | <a href="#">NM_170736.1</a> | KIR1.3;KIR4.2;MGC13584         | inward      | membran     | potassium   |
| GI_25777639-A | 235.5   | 410.9  | 311    | KCNJ15   | <a href="#">NM_170737.1</a> | KIR1.3;KIR4.2;MGC13584         | inward      | membran     | potassium   |
| GI_25777641-S | 307.8   | 379.3  | 318.1  | KCNMB1   | <a href="#">NM_004137.2</a> | SLO-BETA;hslo-beta;K(VCA)beta  | potassium   |             | potassium   |
| GI_25777642-S | 116.9   | 135.4  | 126.2  | KCNN1    | <a href="#">NM_002248.3</a> | SK1;hSK1;SKCA1;KCa2.1          | calcium-    | voltage-    | potassium   |
| GI_25777644-I | 233.3   | 266.1  | 240.9  | KCNN2    | <a href="#">NM_021614.2</a> | SK2;hSK2;SKCA2;KCa2.2          | ion         | integral to | potassium   |
| GI_25777646-A | 96.9    | 95.1   | 95.9   | KCNN2    | <a href="#">NM_170775.1</a> | SK2;hSK2;SKCA2;KCa2.2          | ion         | integral to | potassium   |
| GI_25777646-I | 489.5   | 524.5  | 596.5  | KCNN2    | <a href="#">NM_170775.1</a> | SK2;hSK2;SKCA2;KCa2.2          | ion         | integral to | potassium   |
| GI_25777648-I | 275.9   | 344.3  | 299.6  | KCNN3    | <a href="#">NM_002249.3</a> | SK3;hSK3;SKCA3;KCa2.3          | calcium-    | voltage-    | potassium   |
| GI_25777649-A | 112     | 113.5  | 102    | KCNN3    | <a href="#">NM_170782.1</a> | SK3;hSK3;SKCA3;KCa2.3          | calcium-    | voltage-    | potassium   |
| GI_25777649-I | 89.7    | 92.7   | 87.5   | KCNN3    | <a href="#">NM_170782.1</a> | SK3;hSK3;SKCA3;KCa2.3          | calcium-    | voltage-    | potassium   |

|               |        |        |        |         |                             |                                        |              |             |             |
|---------------|--------|--------|--------|---------|-----------------------------|----------------------------------------|--------------|-------------|-------------|
| GI_25777651-S | 1401.2 | 980.1  | 966.4  | KCNN4   | <a href="#">NM_002250.2</a> | IK1;SK4;KCA4;hSK4;IKCA1;hKCa4;KCa3.1;h | calcium-     | voltage-    | potassium   |
| GI_25777652-S | 178.9  | 195    | 188.1  | KCNS1   | <a href="#">NM_002251.3</a> | KV9.1                                  | potassium    | voltage-    | potassium   |
| GI_25777656-A | 166.6  | 196.9  | 169.1  | CD200R  | <a href="#">NM_138940.1</a> | OX2R;MOX2R;HCRTR2                      | receptor     | integral to |             |
| GI_25777664-I | 102.9  | 109.9  | 104.9  | PKHD1   | <a href="#">NM_138694.2</a> | FCYT;ARPKD;TIGM1                       | receptor     | integral to |             |
| GI_25777666-A | 103.7  | 105.5  | 97.1   | PKHD1   | <a href="#">NM_170724.1</a> | FCYT;ARPKD;TIGM1                       | receptor     | integral to |             |
| GI_25777666-I | 111.9  | 127.9  | 105.7  | PKHD1   | <a href="#">NM_170724.1</a> | FCYT;ARPKD;TIGM1                       | receptor     | integral to |             |
| GI_25777668-S | 159.1  | 199.8  | 175.6  | FAM12A  | <a href="#">NM_006683.3</a> | EP3A;HE3A;HE3ALPHA;HE3-ALPHA           | pancreatic   | extracellul | sperm       |
| GI_25777669-S | 320.8  | 383.4  | 326.8  | FAM12B  | <a href="#">NM_022360.2</a> | EP3B;HE3B;HE3BETA;HE3-BETA             | molecular    | extracellul | spermatid   |
| GI_25777670-S | 354.8  | 371.7  | 354.6  | PPP1R10 | <a href="#">NM_002714.2</a> | FB19;CAT53;PNUTS                       | nucleic      | nucleus     | protein-    |
| GI_25777672-I | 118.8  | 115.2  | 115.7  | PPP1R11 | <a href="#">NM_170781.1</a> | HCGV;HCG-V;TCTE5;TCTEX5                | protein      | soluble     |             |
| GI_25777674-A | 103.1  | 117.6  | 85.2   | RASSF2  | <a href="#">NM_170773.1</a> | KIAA0168                               |              |             | neuropepti  |
| GI_25777674-I | 177.3  | 214.7  | 204.5  | RASSF2  | <a href="#">NM_170773.1</a> | KIAA0168                               |              |             | neuropepti  |
| GI_25777679-A | 249.2  | 257.5  | 228.5  | RASSF1  | <a href="#">NM_170712.1</a> | 123F2;RDA32;NORE2A;RASSF1A;REH3P21     |              |             |             |
| GI_25777679-I | 97     | 108.7  | 97.9   | RASSF1  | <a href="#">NM_170712.1</a> | 123F2;RDA32;NORE2A;RASSF1A;REH3P21     |              |             |             |
| GI_25777681-I | 103.1  | 111    | 101    | RASSF1  | <a href="#">NM_170713.1</a> | 123F2;RDA32;NORE2A;RASSF1A;REH3P21     |              |             |             |
| GI_25777691-A | 167.5  | 132.8  | 152    | TRIM35  | <a href="#">NM_015066.1</a> | HLS5;MAIR;KIAA1098;MGC17233            |              |             |             |
| GI_25777693-I | 90     | 96.8   | 98     | TRIM35  | <a href="#">NM_171982.1</a> | HLS5;MAIR;KIAA1098;MGC17233            |              |             |             |
| GI_25777695-I | 103.9  | 112.6  | 104.1  | TRIM39  | <a href="#">NM_021253.2</a> | TFP;RNF23;MGC32984                     | zinc ion     | kinesin     | biological_ |
| GI_25777697-A | 868.6  | 662.4  | 640.5  | TRIM39  | <a href="#">NM_172016.1</a> | TFP;RNF23;MGC32984                     | zinc ion     | kinesin     | biological_ |
| GI_25777699-I | 2368.6 | 2656.9 | 2834.3 | ZFP91   | <a href="#">NM_053023.2</a> | PZF;FKSG11                             |              |             |             |
| GI_25777700-A | 216.2  | 286.2  | 275.6  | ZFP91   | <a href="#">NM_170768.1</a> | PZF;FKSG11                             |              |             |             |
| GI_25777702-I | 101.4  | 98.5   | 103.6  | ZNF398  | <a href="#">NM_020781.2</a> | P51;P71;ZER6;KIAA1339                  | DNA          | nucleus     | regulation  |
| GI_25777703-A | 397.1  | 407.1  | 376.2  | ZNF398  | <a href="#">NM_170686.1</a> | P51;P71;ZER6;KIAA1339                  | DNA          | nucleus     | regulation  |
| GI_25777705-A | 760.3  | 611    | 476.2  | ZNRD1   | <a href="#">NM_014596.4</a> | Rpa12;hZR14;HTEX-6;tctex-6;MGC13376    | DNA-         | nucleus     | nucleobas   |
| GI_25777706-I | 755.7  | 550.7  | 469.7  | ZNRD1   | <a href="#">NM_170783.1</a> | Rpa12;hZR14;HTEX-6;tctex-6;MGC13376    | DNA-         | nucleus     | nucleobas   |
| GI_25777708-A | 143.6  | 163.2  | 133.5  | THEA    | <a href="#">NM_015547.2</a> | BFIT;BFIT1;BFIT2;THEM1;STARD14;KIAA07  | serine       | cytoplasm   | response    |
| GI_25777708-I | 126.7  | 146.3  | 129.3  | THEA    | <a href="#">NM_015547.2</a> | BFIT;BFIT1;BFIT2;THEM1;STARD14;KIAA07  | serine       | cytoplasm   | response    |
| GI_25777709-I | 167.1  | 211    | 135.4  | THEA    | <a href="#">NM_147161.2</a> | BFIT;BFIT1;BFIT2;THEM1;STARD14;KIAA07  | serine       | cytoplasm   | response    |
| GI_25777710-I | 97.5   | 92.8   | 80.9   | SKP1A   | <a href="#">NM_006930.2</a> | OCP2;SKP1;EMC19;OCP-                   |              |             |             |
| GI_25777712-A | 7216   | 8891.5 | 6864.9 | SKP1A   | <a href="#">NM_170679.1</a> | OCP2;SKP1;EMC19;OCP-                   |              |             |             |
| GI_25777714-I | 119.7  | 137.9  | 109.4  | RNF39   | <a href="#">NM_025236.2</a> | HZF;HZFW;LIRF;HZFW1                    |              |             |             |
| GI_25777717-A | 124.4  | 122.8  | 124.9  | RNF39   | <a href="#">NM_170770.1</a> | HZF;HZFW;LIRF;HZFW1                    |              |             |             |
| GI_25777719-A | 212.5  | 135.2  | 113.7  | ALDH5A1 | <a href="#">NM_001080.3</a> | SSDH;SSADH                             | succinate-   | mitochond   | aminobuty   |
| GI_25777722-S | 101.8  | 96.7   | 79     | ALDH1A1 | <a href="#">NM_000689.3</a> | ALDC;ALDH1;PUMB1;ALDH11;RALDH1;ALD     | aldehyde     | cytosol     | aldehyde    |
| GI_25777727-A | 120.4  | 118.2  | 109.9  | ALDH1A2 | <a href="#">NM_170697.1</a> | RALDH2;MGC26444;RALDH2-T;RALDH(II)     | aldehyde     |             | vitamin A   |
| GI_25777729-S | 380.8  | 424.8  | 249.8  | ALDH1B1 | <a href="#">NM_000692.3</a> | ALDH5;ALDHX;MGC2230                    | aldehyde     | mitochond   | carbohydr   |
| GI_25777731-S | 376.9  | 536.5  | 283    | ALDH2   | <a href="#">NM_000690.2</a> | ALDM;ALDHI;ALDH-E2;MGC1806             | aldehyde     | mitochond   | alcohol     |
| GI_25777733-I | 209.5  | 262.8  | 273.1  | ALDH4A1 | <a href="#">NM_003748.2</a> | P5CD;ALDH4;P5CDH;P5CDhL;P5CDhS         | 1-pyrroline- | mitochond   | proline     |
| GI_25777735-A | 150.5  | 253.4  | 292.6  | ALDH4A1 | <a href="#">NM_170726.1</a> | P5CD;ALDH4;P5CDH;P5CDhL;P5CDhS         | 1-pyrroline- | mitochond   | proline     |
| GI_25777737-S | 353.8  | 416.6  | 379.9  | ALDH6A1 | <a href="#">NM_005589.2</a> | MMSDH;MMSADHA;MGC40271                 | methylmal    | mitochond   | pyrimidine  |
| GI_25777738-S | 3885.3 | 3845.2 | 4456.6 | ALDH9A1 | <a href="#">NM_000696.2</a> | E3;ALDH4;ALDH7;ALDH9;TMABADH           | aldehyde     |             | aldehyde    |
| GI_25777740-S | 217.9  | 228.7  | 227.4  | PGBD1   | <a href="#">NM_032507.2</a> | HUCEP-4;dJ874C20.4                     | scavenger    | membran     | regulation  |
| GI_25777741-S | 171.1  | 200.8  | 167.1  | PGBD2   | <a href="#">NM_170725.1</a> |                                        |              |             |             |
| GI_25777743-S | 152.7  | 180.6  | 171.3  | PGBD3   | <a href="#">NM_170753.1</a> | FLJ90201                               | electron     |             | electron    |

|               |        |        |        |            |                             |                                      |             |             |            |
|---------------|--------|--------|--------|------------|-----------------------------|--------------------------------------|-------------|-------------|------------|
| GI_25777745-S | 166.6  | 182.6  | 168.3  | PGBD4      | <a href="#">NM_152595.2</a> | FLJ32638;FLJ37497                    |             |             |            |
| GI_25777747-S | 121.2  | 135.7  | 138.7  | PGBD5      | <a href="#">NM_024554.2</a> | FLJ11413;DKFZp761A0620               |             |             |            |
| GI_25914748-S | 581.4  | 711.4  | 923.5  | ABCC10     | <a href="#">NM_033450.2</a> | MRP7;SIMRP7;EST182763                | nucleotide  | membran     | transport  |
| GI_25914751-I | 81.6   | 76.8   | 90.8   | MKKS       | <a href="#">NM_018848.2</a> | KMS;MKS;BBS6;HMCS                    | chaperone   |             | gonad      |
| GI_25914753-A | 1384.7 | 1628.2 | 667.6  | MKKS       | <a href="#">NM_170784.1</a> | KMS;MKS;BBS6;HMCS                    | chaperone   |             | gonad      |
| GI_25914753-I | 321.8  | 336.9  | 232.8  | MKKS       | <a href="#">NM_170784.1</a> | KMS;MKS;BBS6;HMCS                    | chaperone   |             | gonad      |
| GI_25952067-I | 104.2  | 113.9  | 109.5  | ABCC13     | <a href="#">NM_138726.2</a> | PRED6;C21orf73                       |             |             |            |
| GI_25952070-I | 330.6  | 383.7  | 344.4  | ABCC13     | <a href="#">NM_172024.1</a> | PRED6;C21orf73                       |             |             |            |
| GI_25952073-A | 109.3  | 117.4  | 114.9  | ABCC13     | <a href="#">NM_172025.1</a> | PRED6;C21orf73                       |             |             |            |
| GI_25952079-S | 227.2  | 301.7  | 276.5  | KCNA2      | <a href="#">NM_004974.2</a> | HK4;MK2;HBK5;NGK1;RBK2;HUKIV;KV1.2   | potassium   | voltage-    | potassium  |
| GI_25952081-S | 113.5  | 134.7  | 126.1  | KCNA3      | <a href="#">NM_002232.2</a> | MK3;HGK5;HLK3;PCN3;HPCN3;KV1.3;HUKII | voltage-    | voltage-    | potassium  |
| GI_25952084-S | 122.3  | 121.5  | 112    | KCNA4      | <a href="#">NM_002233.2</a> | HK1;HBK4;PCN2;HPCN2;HUKII;KCNA8;KV1  | potassium   | voltage-    | potassium  |
| GI_25952086-S | 151.4  | 197.9  | 185.5  | KCNA5      | <a href="#">NM_002234.2</a> | HK2;HCK1;PCN1;HPCN1;KV1.5            | delayed     | voltage-    | potassium  |
| GI_25952089-S | 108.8  | 132.7  | 118.8  | KCNA6      | <a href="#">NM_002235.2</a> | HBK2;KV1.6                           | voltage-    | voltage-    | potassium  |
| GI_25952091-S | 103.3  | 93.9   | 108.1  | KCNA7      | <a href="#">NM_031886.2</a> | HAK6;KV1.7                           | voltage-    | voltage-    | cation     |
| GI_25952098-A | 149.8  | 174.8  | 167.7  | KCNMB3     | <a href="#">NM_171828.1</a> |                                      | potassium   |             |            |
| GI_25952098-I | 150.9  | 165.8  | 153.8  | KCNMB3     | <a href="#">NM_171828.1</a> |                                      | potassium   |             |            |
| GI_25952101-I | 114.5  | 149.9  | 116.8  | KCNMB3     | <a href="#">NM_171829.1</a> |                                      | potassium   |             |            |
| GI_25952104-I | 153    | 193.5  | 170.4  | KCNMB3     | <a href="#">NM_171830.1</a> |                                      | potassium   |             |            |
| GI_25952107-S | 429.1  | 425.4  | 530.9  | KCNS3      | <a href="#">NM_002252.3</a> | KV9.3;MGC9481                        | potassium   | voltage-    | potassium  |
| GI_25952110-S | 108.1  | 113.3  | 117.8  | TNF        | <a href="#">NM_000594.2</a> | DIF;TNFA;TNFSF2;CACHECTIN            | tumor       | soluble     | response   |
| GI_25952117-A | 93.7   | 116    | 106.5  | CAMK2A     | <a href="#">NM_171825.1</a> | CAMKA;KIAA0968                       | calmoduli   |             | protein    |
| GI_25952121-S | 424.2  | 421.6  | 330.9  | BBS4       | <a href="#">NM_033028.2</a> |                                      |             |             | vision     |
| GI_25952130-S | 141.3  | 156.6  | 146.6  | ADCY2      | <a href="#">NM_020546.1</a> | HBAC2;KIAA1060                       | adenylate   | integral to | signal     |
| GI_25952133-S | 136.6  | 161.1  | 131.3  | DISP1      | <a href="#">NM_032890.2</a> | DISPA;MGC13130;MGC16796;DKFZP434I04  |             |             |            |
| GI_25952136-S | 137.8  | 135.5  | 114.4  | CNTF       | <a href="#">NM_000614.2</a> | HCNTF                                | ciliary     | extracellul | synaptic   |
| GI_25952143-I | 144.6  | 166.9  | 160.9  | TNFSF14    | <a href="#">NM_003807.2</a> | LTg;TR2;HVEML;LIGHT                  | receptor    | integral to | induction  |
| GI_25952146-A | 112.5  | 104.6  | 110.2  | TNFSF14    | <a href="#">NM_172014.1</a> | LTg;TR2;HVEML;LIGHT                  | receptor    | integral to | induction  |
| GI_25952149-I | 97     | 99.7   | 99     | ALDH8A1    | <a href="#">NM_022568.2</a> | ALDH12;DJ352A20.2                    | oxidoredu   |             | metabolis  |
| GI_25952151-A | 125.9  | 146.3  | 103.5  | ALDH8A1    | <a href="#">NM_170771.1</a> | ALDH12;DJ352A20.2                    | oxidoredu   |             | metabolis  |
| GI_26006460-S | 539.4  | 714    | 627.1  | KIRREL3    | <a href="#">NM_032531.1</a> | KIRRE;NEPH2;KIAA1867                 |             |             |            |
| GI_26006850-S | 107.3  | 114.8  | 87.6   | PDE8B      | <a href="#">NM_003719.1</a> |                                      | signal      | cellular_co | cyclic     |
| GI_26006854-S | 212.1  | 250.3  | 221.1  | FLJ30317   | <a href="#">NM_172136.1</a> |                                      |             |             |            |
| GI_26024192-S | 1380.1 | 1214.2 | 992.5  | IMAGE34514 | <a href="#">NM_053052.2</a> |                                      |             |             |            |
| GI_26024194-S | 270.9  | 327.4  | 290.9  | LOC84518   | <a href="#">NM_032488.2</a> |                                      |             |             |            |
| GI_26024196-S | 210    | 169.8  | 149.6  | DGAT2      | <a href="#">NM_032564.2</a> |                                      |             |             |            |
| GI_26024208-S | 97.8   | 106.9  | 94.2   | LOC51270   | <a href="#">NM_016521.2</a> |                                      | transcripti | transcripti | regulation |
| GI_26024216-A | 211.6  | 252.1  | 226    | NRAP       | <a href="#">NM_006175.2</a> |                                      | structural  | actin       | actin      |
| GI_26024320-S | 84.5   | 90.1   | 91.4   | IL28A      | <a href="#">NM_172138.1</a> | IFNL2;IL-28A                         |             |             |            |
| GI_26024324-S | 196    | 221.7  | 211.6  | IL29       | <a href="#">NM_172140.1</a> | IFNL1;IL-29                          |             |             |            |
| GI_26024330-S | 4906.9 | 7796.6 | 7287.7 | TPI1       | <a href="#">NM_000365.3</a> | TPI                                  | triose-     |             | pentose-   |
| GI_26024341-S | 83.9   | 94.4   | 93.6   | FLJ23356   | <a href="#">NM_032237.2</a> |                                      | ATP         |             | protein    |
| GI_26051203-I | 86.5   | 96.8   | 79.9   | CAMK2B     | <a href="#">NM_001220.3</a> | CAM2;CAMK2;CAMKB;MGC29528            | calcium/ca  |             | protein    |
| GI_26051217-A | 550.4  | 661.1  | 581.2  | CAMK2B     | <a href="#">NM_172084.1</a> | CAM2;CAMK2;CAMKB;MGC29528            | calcium/ca  |             | protein    |



|               |        |        |        |           |                             |                                    |             |              |             |
|---------------|--------|--------|--------|-----------|-----------------------------|------------------------------------|-------------|--------------|-------------|
| GI_26051219-S | 667.1  | 594.9  | 476.4  | CATSPER1  | <a href="#">NM_053054.2</a> | CATSPER;MGC33335;MGC33368          | cation      | integral to  | cation      |
| GI_26051226-A | 138.2  | 137.1  | 128.8  | CATSPER2  | <a href="#">NM_172097.1</a> | MGC33346                           |             |              |             |
| GI_26051226-I | 759.7  | 817.2  | 796.9  | CATSPER2  | <a href="#">NM_172097.1</a> | MGC33346                           |             |              |             |
| GI_26051230-I | 2799.8 | 2474.9 | 1548.4 | LACTB     | <a href="#">NM_032857.2</a> | G24;MRPL56;FLJ14902                | structural  | mitochond    |             |
| GI_26051232-A | 855.4  | 883.5  | 531.3  | LACTB     | <a href="#">NM_171846.1</a> | G24;MRPL56;FLJ14902                | structural  | mitochond    |             |
| GI_26051232-I | 347.1  | 535    | 339.7  | LACTB     | <a href="#">NM_171846.1</a> | G24;MRPL56;FLJ14902                | structural  | mitochond    |             |
| GI_26051234-S | 862.8  | 881.2  | 765.9  | NUP133    | <a href="#">NM_018230.2</a> | hNUP133;FLJ10814;MGC21133          | nucleocyto  | nucleus      | transport   |
| GI_26051236-S | 402.2  | 374.9  | 343.9  | NUP54     | <a href="#">NM_017426.2</a> | MGC13407                           |             | nuclear      | nucleocyto  |
| GI_26051238-S | 956.1  | 1360.5 | 1129.5 | TNFAIP1   | <a href="#">NM_021137.3</a> | B12;B61;EDP1;MGC2317               | voltage-    | membran      | potassium   |
| GI_26051239-S | 442.4  | 684.1  | 520.2  | TNFAIP2   | <a href="#">NM_006291.2</a> | B94                                |             | extracellul  | angiogene   |
| GI_26051241-S | 191.5  | 241.8  | 193.8  | TNFAIP3   | <a href="#">NM_006290.2</a> | A20;TNFA1P2                        | apoptosis   | nucleus      | apoptosis   |
| GI_26051242-S | 134.3  | 131.2  | 131.5  | TNFAIP6   | <a href="#">NM_007115.2</a> | TSG6                               | hyaluronic  | extracellul  | signal      |
| GI_26051249-A | 473.6  | 579.7  | 515.8  | TNFSF13   | <a href="#">NM_172089.1</a> | APRIL;TALL2;TWE-PRIL               | receptor    | membran      | positive    |
| GI_26051251-I | 291    | 361.3  | 320.5  | RASGRP4   | <a href="#">NM_052949.2</a> |                                    |             |              |             |
| GI_26051257-A | 109.8  | 125.3  | 116.4  | RASGRP4   | <a href="#">NM_170604.1</a> |                                    |             |              |             |
| GI_26051257-I | 139.5  | 181.6  | 156.3  | RASGRP4   | <a href="#">NM_170604.1</a> |                                    |             |              |             |
| GI_26051259-I | 89.4   | 83.9   | 93     | KCNQ2     | <a href="#">NM_004518.2</a> | BFNC;EBN1;ENB1;HNSPC;KV7.2;KVEBN1  | potassium   | voltage-     | potassium   |
| GI_26051263-I | 102    | 112.3  | 109.8  | KCNQ2     | <a href="#">NM_172107.1</a> | BFNC;EBN1;ENB1;HNSPC;KV7.2;KVEBN1  | potassium   | voltage-     | potassium   |
| GI_26051267-A | 96.7   | 94.9   | 86.1   | KCNQ2     | <a href="#">NM_172109.1</a> | BFNC;EBN1;ENB1;HNSPC;KV7.2;KVEBN1  | potassium   | voltage-     | potassium   |
| GI_26051267-I | 142.9  | 150.3  | 135.2  | KCNQ2     | <a href="#">NM_172109.1</a> | BFNC;EBN1;ENB1;HNSPC;KV7.2;KVEBN1  | potassium   | voltage-     | potassium   |
| GI_26051270-A | 116.7  | 126.7  | 122.3  | KCNH2     | <a href="#">NM_172056.1</a> | ERG1;HERG;LQT2;HERG1;Kv11.1        | potassium   | voltage-     | potassium   |
| GI_26051270-I | 112.1  | 122    | 110.3  | KCNH2     | <a href="#">NM_172056.1</a> | ERG1;HERG;LQT2;HERG1;Kv11.1        | potassium   | voltage-     | potassium   |
| GI_26051272-I | 120.3  | 122.2  | 118.8  | KCNH2     | <a href="#">NM_172057.1</a> | ERG1;HERG;LQT2;HERG1;Kv11.1        | potassium   | voltage-     | potassium   |
| GI_26051274-S | 277.6  | 244.2  | 203.7  | KCNMB4    | <a href="#">NM_014505.4</a> |                                    | potassium   | membran      | potassium   |
| GI_26051277-S | 4111.4 | 3496.4 | 3521   | POM121    | <a href="#">NM_172020.1</a> | MGC3792;KIAA0618;DKFZP586G1822;DKF |             |              |             |
| GI_26080430-S | 115.2  | 105.8  | 91.3   | FLJ12735  | <a href="#">NM_024857.3</a> |                                    | nucleotide  |              |             |
| GI_26080432-S | 476.8  | 488.3  | 701.2  | DPP9      | <a href="#">NM_139159.2</a> | DPRP2                              | dipeptidyl- | membran      | proteolysis |
| GI_26105977-S | 625.1  | 801.5  | 610    | CENPB     | <a href="#">NM_001810.4</a> |                                    | satellite   | centromer    | chromoso    |
| GI_26190607-S | 210.3  | 309.1  | 256.6  | SYNJ2     | <a href="#">NM_003898.1</a> | INPP5H                             | inositol-   | insoluble    | signal      |
| GI_26190609-S | 105.2  | 98.7   | 106.1  | ST6GalIII | <a href="#">NM_032528.1</a> | KIAA1877                           |             |              |             |
| GI_26190613-S | 109.8  | 134.7  | 135.8  | PLEKHK1   | <a href="#">NM_145307.2</a> | RTKN2                              |             | intracellula | signal      |
| GI_26190615-S | 247.5  | 252.9  | 246.6  | KLHDC1    | <a href="#">NM_172193.1</a> | MST025;c14_5298                    |             |              |             |
| GI_26449156-S | 99.7   | 94.2   | 91.2   | TAC4      | <a href="#">NM_170685.1</a> | HK-1;Pptc;PPT-C                    |             |              | tachykinin  |
| GI_26553431-S | 394.2  | 420.6  | 455.4  | DHX29     | <a href="#">NM_019030.1</a> | DDX29                              | nucleic     |              |             |
| GI_26638649-S | 6042   | 4731.6 | 3400.9 | KCNMA1    | <a href="#">NM_002247.2</a> | SLO;BKTM;MaxiK;SAKCA;KCa1.1;SLO-   | calcium-    | voltage-     | potassium   |
| GI_26638651-S | 119.1  | 113.8  | 107.8  | KCNQ3     | <a href="#">NM_004519.2</a> | EBN2;BFNC2;KV7.3                   | potassium   | voltage-     | potassium   |
| GI_26638652-I | 121.9  | 127.4  | 127.6  | KCNQ4     | <a href="#">NM_004700.2</a> | DFNA2;KV7.4                        | potassium   | voltage-     | potassium   |
| GI_26638654-A | 112.5  | 109.1  | 95.2   | KCNQ4     | <a href="#">NM_172163.1</a> | DFNA2;KV7.4                        | potassium   | voltage-     | potassium   |
| GI_26638656-S | 6641.5 | 7272.2 | 6526.3 | MRPL20    | <a href="#">NM_017971.2</a> | L20mt;MGC4779;FLJ10024             |             |              |             |
| GI_26638658-S | 754.5  | 894    | 769.8  | MRPL40    | <a href="#">NM_003776.2</a> | URIM;NLVCF;MGC9400;MRP-L22         | structural  | nucleus      | embryoge    |
| GI_26638660-I | 130.9  | 121.4  | 109.2  | MSH5      | <a href="#">NM_002441.2</a> | NG23;MutSH5;C6orf26;MGC2939        |             |              | meiotic     |
| GI_26638661-I | 227.8  | 260.3  | 232.5  | MSH5      | <a href="#">NM_025259.3</a> | NG23;MutSH5;C6orf26;MGC2939        |             |              | meiotic     |
| GI_26638665-A | 282.2  | 320.1  | 284    | MSH5      | <a href="#">NM_172166.1</a> | NG23;MutSH5;C6orf26;MGC2939        |             |              | meiotic     |
| GI_26665868-S | 298.2  | 376.5  | 229.6  | TUWD12    | <a href="#">NM_172240.1</a> |                                    |             |              |             |

|               |        |        |        |          |                             |                                   |              |                        |
|---------------|--------|--------|--------|----------|-----------------------------|-----------------------------------|--------------|------------------------|
| GI_26665874-S | 82.9   | 93.7   | 84.3   | GOR      | <a href="#">NM_172239.1</a> | exonuclea                         | intracellula |                        |
| GI_26665876-S | 93.2   | 108.2  | 101.5  | APBB1IP  | <a href="#">NM_019043.2</a> | RIAM;INAG1                        |              | neuropepti             |
| GI_26665878-S | 101.4  | 108.8  | 107.9  | CTAGE-2  | <a href="#">NM_172241.1</a> |                                   |              |                        |
| GI_26665888-I | 544.6  | 660.8  | 535.2  | AK2      | <a href="#">NM_013411.2</a> | ADK2                              | adenylate    | mitochond              |
| GI_26665889-I | 2097.3 | 2892.9 | 2354.9 | AK2      | <a href="#">NM_001625.2</a> | ADK2                              | adenylate    | mitochond              |
| GI_26665890-A | 1175.6 | 1547.3 | 1288.7 | AK2      | <a href="#">NM_172199.1</a> | ADK2                              | adenylate    | mitochond              |
| GI_26665892-S | 290.8  | 500.9  | 362    | HLA-DRB5 | <a href="#">NM_002125.3</a> |                                   | class II     | integral to perception |
| GI_26667164-S | 636.5  | 658.8  | 793.3  | MRPL38   | <a href="#">NM_032478.2</a> | RPML3;MRP-L3;HSPC262;MGC4810      |              |                        |
| GI_26667166-A | 987    | 1110.9 | 489.7  | MRPL42   | <a href="#">NM_014050.2</a> | MRPS32;PTD007;RPML31;HSPC204;MRP- | structural   | mitochond protein      |
| GI_26667176-S | 1392.5 | 1296.7 | 1221.4 | MRPL46   | <a href="#">NM_022163.2</a> | LIIEG2;P2ECSL;C15orf4;MGC22762    |              |                        |
| GI_26667179-A | 295.3  | 200.3  | 151.8  | CAMK2D   | <a href="#">NM_001221.2</a> | CAMKD;MGC44911                    |              |                        |
| GI_26667179-I | 109.3  | 123.5  | 120.3  | CAMK2D   | <a href="#">NM_001221.2</a> | CAMKD;MGC44911                    |              |                        |
| GI_26667182-I | 89     | 83.5   | 90.5   | CAMK2D   | <a href="#">NM_172115.1</a> | CAMKD;MGC44911                    |              |                        |
| GI_26667190-A | 607.8  | 610.4  | 528.6  | CAMK2G   | <a href="#">NM_001222.2</a> | CAMK;CAMKG;CAMK-II;MGC26678       | calcium/ca   | protein                |
| GI_26667213-I | 111.2  | 108.6  | 102.9  | EYA1     | <a href="#">NM_000503.3</a> | BOP;BOR                           |              | hearing                |
| GI_26667218-A | 126.5  | 196.8  | 206.7  | EYA1     | <a href="#">NM_172059.1</a> | BOP;BOR                           |              | hearing                |
| GI_26667229-A | 112.1  | 148    | 115.5  | EYA2     | <a href="#">NM_172110.1</a> | EAB1;MGC10614                     |              | mesoderm               |
| GI_26667231-I | 144.4  | 176.1  | 150.5  | EYA2     | <a href="#">NM_172111.1</a> | EAB1;MGC10614                     |              | mesoderm               |
| GI_26667234-I | 97.2   | 106.8  | 91.6   | EYA2     | <a href="#">NM_172112.1</a> | EAB1;MGC10614                     |              | mesoderm               |
| GI_26667239-I | 91.4   | 90.4   | 89.2   | EYA2     | <a href="#">NM_172113.1</a> | EAB1;MGC10614                     |              | mesoderm               |
| GI_26667242-I | 129.9  | 140.5  | 135.9  | EYA3     | <a href="#">NM_001990.2</a> | DKFZp686C132                      | hydrolase    | vision                 |
| GI_26667245-A | 189.3  | 227.5  | 302.8  | EYA3     | <a href="#">NM_172098.1</a> | DKFZp686C132                      | hydrolase    | vision                 |
| GI_26667245-I | 134.5  | 138.2  | 138.7  | EYA3     | <a href="#">NM_172098.1</a> | DKFZp686C132                      | hydrolase    | vision                 |
| GI_26667254-A | 258.9  | 189.8  | 198.4  | EYA4     | <a href="#">NM_172104.1</a> | DFNA10                            | hydrolase    | vision                 |
| GI_26667256-I | 119.1  | 111.5  | 117.3  | EYA4     | <a href="#">NM_172105.1</a> | DFNA10                            | hydrolase    | vision                 |
| GI_26787960-I | 113    | 119.7  | 108.9  | AGER     | <a href="#">NM_001136.3</a> | RAGE;MGC22357                     | transmem     | integral to response   |
| GI_26787961-A | 134.8  | 141.8  | 143.7  | AGER     | <a href="#">NM_172197.1</a> | RAGE;MGC22357                     | transmem     | integral to response   |
| GI_26787963-A | 1133.1 | 1655.6 | 1159.2 | AGPAT1   | <a href="#">NM_032741.3</a> | G15;LPAATA;MGC4007;MGC5423;1-     | lysosphosp   | endoplas phosphati     |
| GI_26787963-I | 98.4   | 91.8   | 89.8   | AGPAT1   | <a href="#">NM_032741.3</a> | G15;LPAATA;MGC4007;MGC5423;1-     | lysosphosp   | endoplas phosphati     |
| GI_26787964-I | 198.3  | 236    | 211.4  | AGPAT1   | <a href="#">NM_006411.2</a> | G15;LPAATA;MGC4007;MGC5423;1-     | lysosphosp   | endoplas phosphati     |
| GI_26787965-A | 106.3  | 103.8  | 86.2   | ALF      | <a href="#">NM_172196.1</a> | MGC26254                          | RNA          | nucleus transcripti    |
| GI_26787965-I | 130.9  | 153.9  | 128.7  | ALF      | <a href="#">NM_172196.1</a> | MGC26254                          | RNA          | nucleus transcripti    |
| GI_26787969-S | 210.5  | 250.4  | 233.7  | CDSN     | <a href="#">NM_001264.2</a> | HTSS;D6S586E                      | cell         | intercellula epidermal |
| GI_26787971-S | 5173.7 | 5582.4 | 4977.1 | CSNK2B   | <a href="#">NM_001320.5</a> | G5A;CK2B;CK2N;CSK2B               | protein      | protein signal         |
| GI_26787973-S | 275    | 375.8  | 572.2  | HSPA1A   | <a href="#">NM_005345.4</a> | HSP72;HSPA1;HSP70-1               | heat         | cytoplasm mRNA         |
| GI_26787974-S | 566.6  | 906.2  | 1264.3 | HSPA1B   | <a href="#">NM_005346.3</a> | HSP70-2                           | heat         | cytoplasm heat         |
| GI_26787975-S | 1505.7 | 2162.6 | 2230.2 | IL13RA1  | <a href="#">NM_001560.2</a> | NR4;IL-13RA                       | receptor     | interleukin- cell      |
| GI_26787976-S | 106.8  | 111.1  | 218.3  | IL13RA2  | <a href="#">NM_000640.2</a> | IL-13R;IL13BP                     | interleukin  | soluble                |
| GI_26787977-S | 94.7   | 91.2   | 90.9   | IL13     | <a href="#">NM_002188.2</a> | ALRH;P600;IL-13                   | cytokine     | soluble pathogene      |
| GI_26787979-A | 244.6  | 229.6  | 268.7  | IL15     | <a href="#">NM_000585.2</a> | IL-15;MGC9721                     | cytokine     | endosome positive      |
| GI_26787980-A | 227.7  | 225.2  | 176.8  | IL15RA   | <a href="#">NM_002189.2</a> |                                   | interleukin  | signal                 |
| GI_26787980-I | 124.3  | 121.8  | 111.1  | IL15RA   | <a href="#">NM_002189.2</a> |                                   | interleukin  | signal                 |
| GI_26787981-I | 129.6  | 143.4  | 135.1  | IL15RA   | <a href="#">NM_172200.1</a> |                                   | interleukin  | signal                 |
| GI_26787983-I | 182.3  | 197.4  | 185.5  | IL15     | <a href="#">NM_172174.1</a> | IL-15;MGC9721                     | cytokine     | endosome positive      |

|               |        |        |        |           |                             |                                       |             |             |               |
|---------------|--------|--------|--------|-----------|-----------------------------|---------------------------------------|-------------|-------------|---------------|
| GI_26787985-I | 148.4  | 139.5  | 127.3  | IL15      | <a href="#">NM_172175.1</a> | IL-15;MGC9721                         | cytokine    | endosome    | positive      |
| GI_26787987-S | 190.9  | 240.7  | 219.1  | MICB      | <a href="#">NM_005931.2</a> | PERB11.2                              | protein     | integral to | cell          |
| GI_26787990-S | 321.8  | 273.3  | 222.8  | NFKBIL1   | <a href="#">NM_005007.2</a> | IKBL;NFKBIL                           | transcripti |             |               |
| GI_26787992-S | 232.1  | 294.9  | 255.3  | SBLF      | <a href="#">NM_006873.2</a> | STNB1                                 | transcripti | clathrin    | intracellula  |
| GI_26892294-S | 142.9  | 155.1  | 140.3  | MMAA      | <a href="#">NM_172250.1</a> |                                       | ATP         | mitochond   |               |
| GI_26986531-A | 2155.8 | 2065.5 | 2213.1 | EIF2B4    | <a href="#">NM_015636.2</a> | EIF2B;EIF-2B;EIF2Bdelta;DKFZP586J0119 | translation | eukaryotic  | translation   |
| GI_26986533-S | 1102.4 | 826.8  | 889.6  | ARHGAP12  | <a href="#">NM_018287.4</a> | FLJ10971;FLJ20737;FLJ21785            |             |             |               |
| GI_27262621-S | 1883.1 | 2799.9 | 2098.9 | NAV1      | <a href="#">NM_020443.2</a> | POMFIL3;FLJ12560;FLJ14203;KIAA1151;M  | nucleotide  | membran     | metabolis     |
| GI_27262623-I | 117.6  | 121.4  | 107.5  | ABCA5     | <a href="#">NM_018672.2</a> | ABC13;EST90625                        | nucleotide  | membran     | transport     |
| GI_27262625-A | 145    | 138.7  | 139.9  | ABCA5     | <a href="#">NM_172232.1</a> | ABC13;EST90625                        | nucleotide  | membran     | transport     |
| GI_27262625-I | 101.3  | 98.5   | 83.2   | ABCA5     | <a href="#">NM_172232.1</a> | ABC13;EST90625                        | nucleotide  | membran     | transport     |
| GI_27262629-A | 431.5  | 633    | 686.8  | NASP      | <a href="#">NM_152298.2</a> | FLB7527;MGC2297;PRO1999;FLJ31599;FLJ  |             | nucleus     | DNA           |
| GI_27262631-S | 679.5  | 480.4  | 458.4  | C11orf11  | <a href="#">NM_006133.1</a> | NSDDR;KIAA0659                        | triacylglyc |             | lipid         |
| GI_27262633-I | 83.8   | 84.7   | 91.7   | NASP      | <a href="#">NM_172164.1</a> | FLB7527;MGC2297;PRO1999;FLJ31599;FLJ  |             | nucleus     | DNA           |
| GI_27262635-I | 111    | 106.4  | 104.5  | SPAG1     | <a href="#">NM_003114.3</a> | SP75;TPIS;HSD-3.8;FLJ32920            | DNA         | nucleus     | fertilization |
| GI_27262637-A | 111.4  | 120.9  | 101    | SPAG1     | <a href="#">NM_172218.1</a> | SP75;TPIS;HSD-3.8;FLJ32920            | DNA         | nucleus     | fertilization |
| GI_27262637-I | 93.2   | 96.5   | 87.2   | SPAG1     | <a href="#">NM_172218.1</a> | SP75;TPIS;HSD-3.8;FLJ32920            | DNA         | nucleus     | fertilization |
| GI_27262639-I | 91.7   | 105.4  | 102.2  | SPAG6     | <a href="#">NM_012443.2</a> | pf16;MGC26276;Repro-SA-1;DKFZp434I153 |             | axoneme     | spermatid     |
| GI_27262640-A | 172    | 185.8  | 181.8  | SPAG6     | <a href="#">NM_172242.1</a> | pf16;MGC26276;Repro-SA-1;DKFZp434I153 |             | axoneme     | spermatid     |
| GI_27262642-A | 850.4  | 1011.8 | 942.6  | A2LP      | <a href="#">NM_017492.2</a> | A2D;A2LG;A2RP                         |             |             |               |
| GI_27262646-I | 128    | 131.4  | 120.6  | A2LP      | <a href="#">NM_007245.2</a> | A2D;A2LG;A2RP                         |             |             |               |
| GI_27262654-A | 147.5  | 170.5  | 152    | IL16      | <a href="#">NM_004513.3</a> | LCF;IL-16;prIL-16;HsT19289            | cytokine    | extracellul | chemotaxi     |
| GI_27262656-I | 145.3  | 176    | 157.8  | IL16      | <a href="#">NM_172217.1</a> | LCF;IL-16;prIL-16;HsT19289            | cytokine    | extracellul | chemotaxi     |
| GI_27262658-S | 715.9  | 893.3  | 536.8  | CSF1R     | <a href="#">NM_005211.2</a> | FMS;CSFR;FIM2;C-FMS;CD115             | macropha    | integral to | signal        |
| GI_27262662-A | 119.1  | 140.4  | 125.4  | CSF1      | <a href="#">NM_172210.1</a> | MCSF;MGC31930                         | macropha    | cellular_co | positive      |
| GI_27262666-I | 188.9  | 223    | 200.5  | CSF1      | <a href="#">NM_172212.1</a> | MCSF;MGC31930                         | macropha    | cellular_co | positive      |
| GI_27312028-S | 115.3  | 118.1  | 105    | C14orf50  | <a href="#">NM_172365.1</a> |                                       |             |             |               |
| GI_27312030-S | 115.4  | 128.1  | 114.7  | LOST1     | <a href="#">NM_172367.1</a> |                                       | DNA         | nucleus     | regulation    |
| GI_27363459-S | 122.6  | 122.9  | 117.4  | C20orf143 | <a href="#">NM_080750.2</a> |                                       |             |             |               |
| GI_27363460-S | 1067.7 | 926.5  | 876.5  | Magmas    | <a href="#">NM_016069.8</a> | CGI-136                               | molecular   | mitochond   |               |
| GI_27363462-S | 145.6  | 141.6  | 139.7  | C20orf133 | <a href="#">NM_080676.2</a> | dJ631M13.5                            |             |             |               |
| GI_27363466-A | 170.2  | 159.6  | 175.2  | PACE-1    | <a href="#">NM_020423.4</a> | PACE1                                 | ATP         |             | protein       |
| GI_27363469-S | 80     | 95.7   | 97     | DAOA      | <a href="#">NM_172370.1</a> | G72                                   |             |             |               |
| GI_27363481-S | 102.1  | 115.1  | 100.6  | G30       | <a href="#">NM_172368.1</a> |                                       |             |             |               |
| GI_27363485-S | 108.6  | 115.8  | 111.8  | TFAP2BL1  | <a href="#">NM_172238.1</a> |                                       | transcripti | nucleus     | regulation    |
| GI_27363487-S | 157.4  | 173.2  | 161.3  | C1QG      | <a href="#">NM_172369.1</a> | C1QC                                  | defense/i   | extracellul | compleme      |
| GI_27369496-S | 141.5  | 160.3  | 149.6  | CHST2     | <a href="#">NM_004267.2</a> | C6ST                                  | sulfotransf |             | developm      |
| GI_27370564-S | 131.6  | 116.3  | 196.1  | AQP11     | <a href="#">NM_173039.1</a> |                                       | cysteine-   | mitochond   | transport     |
| GI_27374999-S | 2697.1 | 3172.8 | 3110.2 | GABARAPL2 | <a href="#">NM_007285.6</a> | GEF2;GEF-2                            | actin       | cytoskelet  | intracellula  |
| GI_27413157-S | 103    | 115.3  | 103.5  | SCUBE1    | <a href="#">NM_173050.1</a> |                                       | calcium     | membran     | blood         |
| GI_27413907-S | 342.1  | 431.3  | 401    | GBA2      | <a href="#">NM_020944.2</a> | AD035;KIAA1605;MGC16895;DKFZp762K05   |             |             |               |
| GI_27414254-S | 295.4  | 293.8  | 251.8  | HSC20     | <a href="#">NM_172002.2</a> | HSCB;JAC1                             | co-         |             |               |
| GI_27414494-S | 132.5  | 141.7  | 123.4  | MT1B      | <a href="#">NM_005947.1</a> | MT1;MTP                               | heavy       | cytoplasm   | biological_   |
| GI_27414496-S | 1099.8 | 858.4  | 628.1  | HSPC055   | <a href="#">NM_014153.2</a> | FLJ20318                              | nucleic     |             |               |

|               |         |        |        |           |                             |                                       |             |              |             |
|---------------|---------|--------|--------|-----------|-----------------------------|---------------------------------------|-------------|--------------|-------------|
| GI_27436868-S | 266.1   | 345.4  | 297.8  | SPRR4     | <a href="#">NM_173080.1</a> |                                       |             |              |             |
| GI_27436872-S | 305.1   | 328.4  | 303.4  | SHPRH     | <a href="#">NM_173082.1</a> | FLJ90837;KIAA2023                     | ATP         | nucleus      | nucleoso    |
| GI_27436874-S | 484     | 583.9  | 530.7  | RUNDC1    | <a href="#">NM_173079.1</a> | DKFZp761H0421                         |             |              |             |
| GI_27436876-S | 105.3   | 109.3  | 96.3   | TSBF1     | <a href="#">NM_173084.1</a> | MRF1                                  | zinc ion    | intracellula |             |
| GI_27436878-S | 99.8    | 82.7   | 92.9   | ARMC3     | <a href="#">NM_173081.1</a> | FLJ25845;FLJ32827                     |             |              |             |
| GI_27436880-S | 369.2   | 468    | 383.1  | EBAF      | <a href="#">NM_003240.2</a> | LEFTA;TGFB4;LEFTY2;LEFTYA;MGC46222    | transformi  |              | oocyte      |
| GI_27436882-I | 116.3   | 131.1  | 125.5  | EHF       | <a href="#">NM_012153.2</a> | ESE3;ESEJ                             | tumor       | nucleus      | developm    |
| GI_27436884-A | 113.5   | 120.7  | 119.7  | EHF       | <a href="#">NM_172233.1</a> | ESE3;ESEJ                             | tumor       | nucleus      | developm    |
| GI_27436886-S | 726.9   | 663.6  | 705.5  | PBX2      | <a href="#">NM_002586.3</a> | G17;HOX12;PBX2MHC                     | DNA         | nucleus      | anterior    |
| GI_27436888-I | 418.7   | 445.7  | 669.6  | POFUT1    | <a href="#">NM_015352.1</a> | FUT12;O-FUT;MGC2482;O-Fuc-            | fucosyltra  | integral to  | fucose      |
| GI_27436890-A | 125.1   | 146.5  | 147.8  | POFUT1    | <a href="#">NM_172236.1</a> | FUT12;O-FUT;MGC2482;O-Fuc-            | fucosyltra  | integral to  | fucose      |
| GI_27436890-I | 114.4   | 123.9  | 136.2  | POFUT1    | <a href="#">NM_172236.1</a> | FUT12;O-FUT;MGC2482;O-Fuc-            | fucosyltra  | integral to  | fucose      |
| GI_27436892-I | 8300.4  | 7952.3 | 7620.4 | TAPBP     | <a href="#">NM_003190.3</a> | TPN;TAPA;TPSN;NGS17                   | peptide     | endoplas     | immune      |
| GI_27436894-I | 134.6   | 136.8  | 126.6  | TAPBP     | <a href="#">NM_172208.1</a> | TPN;TAPA;TPSN;NGS17                   | peptide     | endoplas     | immune      |
| GI_27436896-A | 234.3   | 266.9  | 237.1  | TAPBP     | <a href="#">NM_172209.1</a> | TPN;TAPA;TPSN;NGS17                   | peptide     | endoplas     | immune      |
| GI_27436898-S | 113.3   | 116.6  | 123.2  | TIMM13    | <a href="#">NM_012458.2</a> | ppv1;TIM13;TIM13B;TIMM13A;TIMM13B     | zinc ion    | mitochond    | mitochond   |
| GI_27436899-S | 3268.9  | 2967.3 | 3083   | TXN2      | <a href="#">NM_012473.3</a> | TRX2;MT-TRX                           | thioredoxi  | mitochond    | electron    |
| GI_27436900-S | 7067.3  | 7602   | 6461.1 | MRPL12    | <a href="#">NM_002949.2</a> | 5c5-                                  | structural  | mitochond    | protein     |
| GI_27436902-S | 1269.7  | 1361.7 | 1290.5 | MRPL16    | <a href="#">NM_017840.2</a> | L16mt;FLJ20484;PNAS-111               |             |              |             |
| GI_27436903-S | 2111.9  | 2406.8 | 2490.7 | MRPL23    | <a href="#">NM_021134.2</a> | RPL23;L23MRP;RPL23L                   | structural  | mitochond    | protein     |
| GI_27436906-S | 1229    | 1225.8 | 1284.8 | MRPL49    | <a href="#">NM_004927.2</a> | NOF;NOF1;L49mt;MGC10656               | structural  | mitochond    | cell growth |
| GI_27436907-S | 910.3   | 947.8  | 1091.1 | MRPL54    | <a href="#">NM_172251.1</a> |                                       |             |              |             |
| GI_27436909-S | 500.8   | 530.8  | 525.2  | FLJ21816  | <a href="#">NM_024675.2</a> | DKFZp667I166                          |             |              |             |
| GI_27436915-A | 101.5   | 104.5  | 104    | MINK      | <a href="#">NM_015716.2</a> | MGC21111                              | protein     |              | JNK         |
| GI_27436916-I | 104.7   | 119    | 104.8  | MINK      | <a href="#">NM_153827.2</a> | MGC21111                              | protein     |              | JNK         |
| GI_27436919-I | 480.2   | 507    | 430.6  | SPAG9     | <a href="#">NM_003971.3</a> | HSS;JLP;PHET;FLJ13450;FLJ14006;FLJ346 |             | integral to  | spermatog   |
| GI_27436921-A | 209.8   | 199.6  | 180.8  | SPAG9     | <a href="#">NM_172345.1</a> | HSS;JLP;PHET;FLJ13450;FLJ14006;FLJ346 |             | integral to  | spermatog   |
| GI_27436921-I | 190.7   | 189.8  | 189.2  | SPAG9     | <a href="#">NM_172345.1</a> | HSS;JLP;PHET;FLJ13450;FLJ14006;FLJ346 |             | integral to  | spermatog   |
| GI_27436923-S | 600.5   | 1188.5 | 869.5  | HIST2H2AC | <a href="#">NM_003517.2</a> | H2A;q;H2AFQ;H2A-GL101                 | DNA         | chromoso     | nucleoso    |
| GI_27436924-A | 1485.3  | 1756.8 | 1955.4 | HRD1      | <a href="#">NM_032431.1</a> | KIAA1810;MGC40372                     |             |              |             |
| GI_27436928-S | 169.9   | 201.6  | 247.5  | HSPA1L    | <a href="#">NM_005527.2</a> | hum70t;HSP70-HOM                      | heat        |              |             |
| GI_27436930-S | 110.1   | 100.1  | 108.2  | OTX1      | <a href="#">NM_014562.2</a> | FLJ38361;MGC15736                     | DNA         | nucleus      | brain       |
| GI_27436931-I | 129     | 148.1  | 137.7  | OTX2      | <a href="#">NM_021728.2</a> | MGC45000                              | transcripti | nucleus      | regulation  |
| GI_27436932-A | 86.3    | 89.1   | 89     | OTX2      | <a href="#">NM_172337.1</a> | MGC45000                              | transcripti | nucleus      | regulation  |
| GI_27436935-A | 184.4   | 226.7  | 207.4  | OTX3      | <a href="#">NM_172225.1</a> | MBX;PAXB                              |             |              |             |
| GI_27436939-A | 115.6   | 108.8  | 102.2  | RELN      | <a href="#">NM_173054.1</a> | RL                                    | serine-     | extracellul  | cell        |
| GI_27436941-S | 20534.9 | 19335  | 14114  | RPS27A    | <a href="#">NM_002954.3</a> | CEP80;UBA80;UBCEP1;HUBCEP80           | structural  | ribosome     | protein     |
| GI_27436942-S | 783.6   | 697.5  | 727.5  | RXRβ      | <a href="#">NM_021976.3</a> | NR2B2;DAUDI6;RCOR-1;MGC1831;H-        | retinoid-X  | nucleus      | regulation  |
| GI_27436943-S | 114.6   | 121.7  | 110.2  | LEFTB     | <a href="#">NM_020997.2</a> | LEFTY1;LEFTYB                         | transformi  |              | TGFbeta     |
| GI_27436944-A | 1849.4  | 3164.4 | 3486.5 | LMNA      | <a href="#">NM_005572.2</a> | FPL;LFP;EMD2;FPLD;HGPS;LDP1;LMN1;LM   | structural  | nuclear      | muscle      |
| GI_27436944-I | 2303    | 3221.4 | 4137.6 | LMNA      | <a href="#">NM_005572.2</a> | FPL;LFP;EMD2;FPLD;HGPS;LDP1;LMN1;LM   | structural  | nuclear      | muscle      |
| GI_27436949-S | 210.3   | 309    | 256.6  | LMNB1     | <a href="#">NM_005573.2</a> | LMN;LMN2;LMNB                         | structural  | nuclear      |             |
| GI_27436950-S | 1869.9  | 2047   | 2266.7 | LMNB2     | <a href="#">NM_032737.2</a> | LMN2;LAMB2;MGC2721                    |             | lamin        | S-specific  |
| GI_27436952-I | 113.4   | 128.5  | 113.8  | ABCA6     | <a href="#">NM_080284.2</a> | EST155051                             | nucleotide  | membran      | transport   |

|               |       |        |       |         |                             |                                       |              |             |              |
|---------------|-------|--------|-------|---------|-----------------------------|---------------------------------------|--------------|-------------|--------------|
| GI_27436954-A | 110.5 | 110.3  | 104.6 | ABCA6   | <a href="#">NM_172346.1</a> | EST155051                             | nucleotide   | membran     | transport    |
| GI_27436956-S | 279.6 | 311.4  | 312.9 | AIP1    | <a href="#">NM_012301.2</a> | ARIP1;MAGI-2;ACVRIP1;KIAA0705         | protein      |             | intracellula |
| GI_27436958-S | 220.7 | 232.1  | 225   | ALMS1   | <a href="#">NM_015120.2</a> | ALSS;KIAA0328                         |              |             |              |
| GI_27436961-I | 93.3  | 107.5  | 95.7  | KCNAB1  | <a href="#">NM_003471.2</a> | hKvb3;AKR6A3;KCNA1B;Kvb1.3;hKvBeta3;K | potassium    | integral to | potassium    |
| GI_27436963-I | 111   | 133.1  | 116.2 | KCNAB1  | <a href="#">NM_172159.1</a> | hKvb3;AKR6A3;KCNA1B;Kvb1.3;hKvBeta3;K | potassium    | integral to | potassium    |
| GI_27436965-A | 149.3 | 158.3  | 159.2 | KCNAB1  | <a href="#">NM_172160.1</a> | hKvb3;AKR6A3;KCNA1B;Kvb1.3;hKvBeta3;K | potassium    | integral to | potassium    |
| GI_27436965-I | 75.8  | 86.6   | 82.6  | KCNAB1  | <a href="#">NM_172160.1</a> | hKvb3;AKR6A3;KCNA1B;Kvb1.3;hKvBeta3;K | potassium    | integral to | potassium    |
| GI_27436968-A | 240.3 | 275.8  | 253   | KCNAB2  | <a href="#">NM_172130.1</a> | AKR6A5;KCNA2B;HKvbeta2;KV-BETA-       | potassium    | integral to | potassium    |
| GI_27436970-S | 158.2 | 175.9  | 170.3 | KCNAB3  | <a href="#">NM_004732.2</a> | AKR6A9;KCNA3B;KCNA3.1B;KV-BETA-3      | potassium    | integral to | potassium    |
| GI_27436972-S | 99.3  | 95.2   | 95.3  | KCNB1   | <a href="#">NM_004975.2</a> | DRK1;KV2.1;h-DRK1                     | delayed      | voltage-    | cation       |
| GI_27436973-S | 95.4  | 94.5   | 88.9  | KCNB2   | <a href="#">NM_004770.2</a> | KV2.2                                 | delayed      | voltage-    | potassium    |
| GI_27436975-S | 124.1 | 125.6  | 117   | KCNE1L  | <a href="#">NM_012282.2</a> | KCNE5                                 |              | voltage-    | regulation   |
| GI_27436977-S | 102.9 | 104.3  | 99.8  | KCNE2   | <a href="#">NM_172201.1</a> | LQT5;LQT6;MIRP1                       | voltage-     | voltage-    | potassium    |
| GI_27436979-S | 109.9 | 140.2  | 116.7 | KCNE3   | <a href="#">NM_005472.2</a> | HOKPP;MIRP2                           | voltage-     | voltage-    | potassium    |
| GI_27436980-S | 347.3 | 480.6  | 280.3 | KCND1   | <a href="#">NM_004979.3</a> | KV4.1                                 | protein      | voltage-    | cation       |
| GI_27436982-S | 103.2 | 129.1  | 105.9 | KCND2   | <a href="#">NM_012281.2</a> | RK5;KV4.2;KIAA1044                    | voltage-     | voltage-    | cation       |
| GI_27436983-I | 116.7 | 140.6  | 135.4 | KCND3   | <a href="#">NM_004980.3</a> | KV4.3;KCND3L;KCND3S;KSHIVB            | A-type       | voltage-    | potassium    |
| GI_27436985-A | 441.3 | 529.4  | 492   | KCND3   | <a href="#">NM_172198.1</a> | KV4.3;KCND3L;KCND3S;KSHIVB            | A-type       | voltage-    | potassium    |
| GI_27436987-A | 154.3 | 125.9  | 98.9  | KCNG1   | <a href="#">NM_002237.2</a> | K13;KH2;KCNG;KV6.1;MGC12878           | potassium    | voltage-    | potassium    |
| GI_27436987-I | 428.9 | 316.5  | 245.5 | KCNG1   | <a href="#">NM_002237.2</a> | K13;KH2;KCNG;KV6.1;MGC12878           | potassium    | voltage-    | potassium    |
| GI_27436989-I | 107.4 | 119    | 109.4 | KCNG1   | <a href="#">NM_172318.1</a> | K13;KH2;KCNG;KV6.1;MGC12878           | potassium    | voltage-    | potassium    |
| GI_27436992-A | 97.5  | 96.9   | 97.4  | KCNG3   | <a href="#">NM_172344.1</a> | KV6.3;KV10.1                          | voltage-     | voltage-    | cation       |
| GI_27436994-I | 129.7 | 155.3  | 130.1 | KCNG4   | <a href="#">NM_133490.2</a> | KV6.3;KV6.4;MGC4558                   | voltage-     | voltage-    | cation       |
| GI_27436995-A | 178.1 | 214.3  | 184.5 | KCNG4   | <a href="#">NM_172347.1</a> | KV6.3;KV6.4;MGC4558                   | voltage-     | voltage-    | cation       |
| GI_27436995-I | 132.7 | 136.8  | 143.4 | KCNG4   | <a href="#">NM_172347.1</a> | KV6.3;KV6.4;MGC4558                   | voltage-     | voltage-    | cation       |
| GI_27436997-S | 151.7 | 162    | 141   | KCNA10  | <a href="#">NM_005549.2</a> | Kcn1;Kv1.8                            | intracellula | voltage-    | potassium    |
| GI_27436998-S | 142.4 | 194.8  | 164.9 | KCNF1   | <a href="#">NM_002236.4</a> | IK8;KH1;KCNF;KV5.1;MGC33316           | potassium    | voltage-    | potassium    |
| GI_27436999-A | 127.4 | 134.8  | 126.8 | KCNH1   | <a href="#">NM_002238.2</a> | EAG;EAG1;h-eag;Kv10.1                 | delayed      | voltage-    | myoblast     |
| GI_27437000-I | 78    | 78     | 80.3  | KCNH1   | <a href="#">NM_172362.1</a> | EAG;EAG1;h-eag;Kv10.1                 | delayed      | voltage-    | myoblast     |
| GI_27437002-A | 158.4 | 132.8  | 153.9 | KREMEN2 | <a href="#">NM_024507.2</a> | KRM2;MGC10791;MGC16709                | oxidoredu    | integral to | metabolis    |
| GI_27437005-I | 166.9 | 191.4  | 163   | KREMEN2 | <a href="#">NM_145348.1</a> | KRM2;MGC10791;MGC16709                | oxidoredu    | integral to | metabolis    |
| GI_27437012-A | 123.4 | 135.9  | 133.9 | CAMKK1  | <a href="#">NM_172207.1</a> | CAMKKA;MGC34095;DKFZp761M0423         |              |             |              |
| GI_27437012-I | 148.9 | 169    | 175.3 | CAMKK1  | <a href="#">NM_172207.1</a> | CAMKKA;MGC34095;DKFZp761M0423         |              |             |              |
| GI_27437022-A | 286.9 | 305.8  | 216   | CAMKK2  | <a href="#">NM_172215.1</a> | CAMKK;CAMKKB;KIAA0787;MGC15254        |              |             |              |
| GI_27437029-S | 168.6 | 154.9  | 232.5 | CSF2    | <a href="#">NM_000758.2</a> | GMCSF                                 | granulocyt   | extracellul | cell         |
| GI_27437039-A | 193.1 | 336.6  | 356.1 | CSF2RA  | <a href="#">NM_172249.1</a> | GMR;CD116;CDw116;CSF2RX;CSF2RY;GM     | receptor     | integral to | antimicrob   |
| GI_27437043-I | 104.5 | 107.5  | 98.9  | CSF3R   | <a href="#">NM_156039.2</a> | CD114;GCSFR                           | receptor     | integral to | defense      |
| GI_27437044-A | 216.5 | 253.4  | 190.1 | CSF3R   | <a href="#">NM_172313.1</a> | CD114;GCSFR                           | receptor     | integral to | defense      |
| GI_27437048-A | 95.5  | 113.9  | 96.4  | CSF3    | <a href="#">NM_172219.1</a> | GCSF;G-CSF;MGC45931                   | granulocyt   | extracellul | positive     |
| GI_27437050-I | 103.7 | 112.9  | 101.6 | CSF3    | <a href="#">NM_172220.1</a> | GCSF;G-CSF;MGC45931                   | granulocyt   | extracellul | positive     |
| GI_27475984-S | 131.5 | 129.2  | 134.5 | NEUROD6 | <a href="#">NM_022728.2</a> | Atoh2;NEX1M;Math-2                    | DNA          | nucleus     | regulation   |
| GI_27477040-S | 673   | 1103.8 | 639.8 | AP2A2   | <a href="#">NM_012305.1</a> | HIP9;HYPJ;ADTAB;CLAPA2;KIAA0899;DKF   | molecular    | coated pit  | intracellula |
| GI_27477044-A | 429.2 | 452.1  | 375.6 | MT      | <a href="#">NM_014507.1</a> | MGC47838;bK1191B2.3                   |              |             |              |
| GI_27477048-S | 86.2  | 87.8   | 87    | ASB17   | <a href="#">NM_080868.1</a> | Asb-17                                |              |             | intracellula |

|               |        |        |                 |                             |                                     |              |             |             |
|---------------|--------|--------|-----------------|-----------------------------|-------------------------------------|--------------|-------------|-------------|
| GI_27477058-S | 2557.2 | 4050.7 | 3703 FAD104     | <a href="#">NM_022763.2</a> | FLJ23399;DKFZp762K137               | hematopoi    | membran     |             |
| GI_27477060-S | 112    | 108.8  | 92.7 CMYA4      | <a href="#">NM_173167.1</a> | UNC45                               |              |             |             |
| GI_27477065-S | 123.9  | 122.3  | 119.8 SPCX      | <a href="#">NM_173168.1</a> |                                     |              |             |             |
| GI_27477067-S | 369.5  | 426.3  | 365.7 AFG3L1    | <a href="#">NM_001132.1</a> | AFG3                                |              |             |             |
| GI_27477069-S | 183.1  | 183.2  | 166 BTAF1       | <a href="#">NM_003972.1</a> | MOT1;TAF172;TAFII170;TAF(II)170     | transcripti  | transcripti | regulation  |
| GI_27477073-A | 127    | 150.9  | 139.2 IL17RB    | <a href="#">NM_018725.2</a> | CRL4;EVI27;IL17BR;IL17RH1;MGC5245   | interleukin  | integral to | defense     |
| GI_27477075-I | 99.5   | 107.3  | 93.1 IL17RB     | <a href="#">NM_172234.1</a> | CRL4;EVI27;IL17BR;IL17RH1;MGC5245   | interleukin  | integral to | defense     |
| GI_27477077-S | 117.2  | 136.1  | 123.3 IL17B     | <a href="#">NM_014443.2</a> | IL-20;IL-17B;ZCYTO7                 | cytokine     | nucleus     | immune      |
| GI_27477078-S | 182.1  | 220.9  | 181.7 IL17C     | <a href="#">NM_013278.3</a> | CX2;IL-21;IL-17C                    | cytokine     | soluble     | cell        |
| GI_27477079-I | 99     | 104.7  | 98.6 IL17E      | <a href="#">NM_022789.2</a> | IL25;IL-25;IL-17E                   | cytokine     | membran     | biological_ |
| GI_27477080-A | 145.3  | 149.1  | 139.9 IL17E     | <a href="#">NM_172314.1</a> | IL25;IL-25;IL-17E                   | cytokine     | membran     | biological_ |
| GI_27477082-A | 166.1  | 192.7  | 185.7 IL17F     | <a href="#">NM_052872.2</a> | ML1;IL24;ML-1;IL-24;IL-26;IL-17F    | cytokine     |             |             |
| GI_27477083-I | 101.7  | 112.1  | 112.9 IL17F     | <a href="#">NM_172343.1</a> | ML1;IL24;ML-1;IL-24;IL-26;IL-17F    | cytokine     |             |             |
| GI_27477085-S | 106.6  | 117.5  | 94.2 IL17       | <a href="#">NM_002190.2</a> | CTLA8;IL-17;IL-17A                  | cytokine     | extracellul | cell death  |
| GI_27477086-S | 203.9  | 107.7  | 83.7 IL18R1     | <a href="#">NM_003855.2</a> | IL1RRP;IL-1Rrp                      | receptor     | integral to | signal      |
| GI_27477087-S | 111.4  | 115.5  | 91.1 IL18RAP    | <a href="#">NM_003853.2</a> | ACPL                                | receptor     | membran     | cell        |
| GI_27477088-I | 122.6  | 125.8  | 131.3 IL4I1     | <a href="#">NM_172374.1</a> | FIG1                                | amine        |             | electron    |
| GI_27477091-A | 115.8  | 112.6  | 108.3 IL4       | <a href="#">NM_172348.1</a> | BSF1;IL-4                           | interleukin- | extracellul | chemotaxi   |
| GI_27477093-I | 236.8  | 284.6  | 249.7 NSD1      | <a href="#">NM_022455.3</a> | STO;SOTOS;ARA267;FLJ22263           | DNA          | nucleus     | cell growth |
| GI_27477094-A | 123.3  | 138.7  | 133.3 NSD1      | <a href="#">NM_172349.1</a> | STO;SOTOS;ARA267;FLJ22263           | DNA          | nucleus     | cell growth |
| GI_27477096-I | 530    | 687.7  | 593.6 CGI-85    | <a href="#">NM_017635.2</a> | MGC703;FLJ20039;MGC21161            |              |             |             |
| GI_27477098-A | 370.1  | 314.7  | 277.4 CGI-85    | <a href="#">NM_016028.3</a> | MGC703;FLJ20039;MGC21161            |              |             |             |
| GI_27477098-I | 1261.5 | 953.7  | 956.7 CGI-85    | <a href="#">NM_016028.3</a> | MGC703;FLJ20039;MGC21161            |              |             |             |
| GI_27477099-I | 92.9   | 106.6  | 102.4 SGCD      | <a href="#">NM_000337.3</a> | SGD;DAGD;35DAG;CMD1L;MGC22567;SG-   |              | sarcoglyca  | muscle      |
| GI_27477100-A | 135.1  | 148.5  | 143.1 SGCD      | <a href="#">NM_172244.1</a> | SGD;DAGD;35DAG;CMD1L;MGC22567;SG-   |              | sarcoglyca  | muscle      |
| GI_27477100-I | 66.7   | 79.7   | 74.9 SGCD       | <a href="#">NM_172244.1</a> | SGD;DAGD;35DAG;CMD1L;MGC22567;SG-   |              | sarcoglyca  | muscle      |
| GI_27477104-S | 90.1   | 80.6   | 86.8 BG1        | <a href="#">NM_015162.3</a> | BGM;FLJ30320;MGC14352               | catalytic    |             | metabolis   |
| GI_27477108-S | 263.2  | 296.9  | 295.9 ITCH      | <a href="#">NM_031483.3</a> | AIF4;AIP4;NAPP1                     | ubiquitin-   | nucleus     | ubiquitin   |
| GI_27477110-S | 884.5  | 889.7  | 816.9 SLU7      | <a href="#">NM_006425.3</a> | MGC9280                             | pre-mRNA     | nucleus     | mRNA        |
| GI_27477112-S | 1035.8 | 1116.5 | 850.9 SREBF2    | <a href="#">NM_004599.2</a> | SREBP2                              | RNA          | Golgi       | lipid       |
| GI_27477116-A | 94     | 111.8  | 97.5 ABCA9      | <a href="#">NM_172386.1</a> | EST640918                           | nucleotide   | membran     | transport   |
| GI_27477118-S | 170    | 205.4  | 172.6 CAMK4     | <a href="#">NM_001744.3</a> | CaMK-GR;MGC36771                    | calcium/ca   |             | protein     |
| GI_27477119-S | 2825   | 2477   | 2211 CORO1C     | <a href="#">NM_014325.2</a> | HCRNN4;coronin-3                    | cell         | kinesin     | phagocyto   |
| GI_27477120-I | 151.2  | 162.1  | 135.8 ICK       | <a href="#">NM_014920.2</a> | MRK;LCK2;KIAA0936;MGC46090          | protein      |             | protein     |
| GI_27477123-A | 97     | 101.9  | 92.3 ICK        | <a href="#">NM_173041.1</a> | MRK;LCK2;KIAA0936;MGC46090          | protein      |             | protein     |
| GI_27477125-S | 4084.4 | 3025   | 3056.1 KPNA4    | <a href="#">NM_002268.3</a> | QIP1;SRP3;IPOA3;MGC12217;MGC26703   |              | importin,   | NLS-        |
| GI_27477126-S | 422.7  | 488.7  | 473.1 KRTHB2    | <a href="#">NM_033033.3</a> | HB2;Hb-2                            | structural   | cellular_co | biological_ |
| GI_27477128-S | 359.9  | 302    | 393.9 MC1R      | <a href="#">NM_002386.2</a> | MSH-R;MGC14337                      | melanocor    | integral to | UV          |
| GI_27477130-S | 2754   | 3410.9 | 3106.1 MRPL17   | <a href="#">NM_022061.2</a> | RPL17L;RPML26;MRP-L26               | structural   | ribosome    | protein     |
| GI_27477131-S | 404.7  | 375.3  | 391.3 PIP3AP    | <a href="#">NM_019061.2</a> | 3-PAP;FLJ20476;KIAA1682             |              |             |             |
| GI_27477133-S | 136.2  | 158.7  | 149.5 NUP210    | <a href="#">NM_024923.2</a> | GP210;POM210;FLJ22389;KIAA0906      |              |             |             |
| GI_27477137-A | 205.3  | 257.8  | 283.2 ZC3HAV1   | <a href="#">NM_024625.3</a> | ZAP;FLB6421;ZC3HDC2;FLJ13288;MGC488 |              |             |             |
| GI_27477137-I | 151.9  | 176.1  | 208.6 ZC3HAV1   | <a href="#">NM_024625.3</a> | ZAP;FLB6421;ZC3HDC2;FLJ13288;MGC488 |              |             |             |
| GI_27477259-S | 105.1  | 129.9  | 110.1 LOC149620 | <a href="#">XM_086604.3</a> |                                     |              |             |             |

|               |        |        |        |            |                             |          |
|---------------|--------|--------|--------|------------|-----------------------------|----------|
| GI_27477322-S | 176.6  | 153    | 122.7  | LOC166867  | <a href="#">XM_094142.3</a> |          |
| GI_27477379-S | 97.6   | 98.5   | 104.5  | LOC284968  | <a href="#">XM_211707.1</a> |          |
| GI_27477392-S | 103.4  | 98.4   | 103.8  | LOC200373  | <a href="#">XM_114222.2</a> |          |
| GI_27477438-S | 115.3  | 150.3  | 123.7  | LOC285205  | <a href="#">XM_211805.1</a> |          |
| GI_27477501-S | 239.6  | 271.8  | 237.5  | LOC91181   | <a href="#">XM_036740.4</a> |          |
| GI_27477609-S | 89     | 96.6   | 90.4   | LOC285307  | <a href="#">XM_211837.1</a> |          |
| GI_27477614-S | 140.3  | 137.8  | 132.9  | LOC285110  | <a href="#">XM_211768.1</a> |          |
| GI_27477654-S | 240.9  | 261.3  | 241.8  | LOC285311  | <a href="#">XM_209563.1</a> |          |
| GI_27477683-S | 104.5  | 106.8  | 100.6  | LOC92196   | <a href="#">XM_043500.3</a> |          |
| GI_27477684-S | 746.9  | 905.2  | 695    | KIAA1728   | <a href="#">XM_043492.3</a> |          |
| GI_27477709-S | 658.2  | 427.6  | 430.7  | DKFZp434D0 | <a href="#">XM_098238.6</a> |          |
| GI_27477718-S | 136.4  | 134.7  | 128.7  | SFRP2      | <a href="#">XM_050625.2</a> |          |
| GI_27477737-S | 250.6  | 274.6  | 210.6  | KIAA1374   | <a href="#">XM_028413.6</a> |          |
| GI_27477767-S | 426.1  | 224    | 137.9  | LOC150946  | <a href="#">XM_097977.2</a> |          |
| GI_27477792-S | 111.4  | 118.2  | 119.3  | LOC285320  | <a href="#">XM_210557.1</a> |          |
| GI_27477860-S | 152.7  | 181.9  | 181.6  | LOC285324  | <a href="#">XM_210559.1</a> |          |
| GI_27477864-S | 96.6   | 93.8   | 82.1   | LOC285326  | <a href="#">XM_211843.1</a> |          |
| GI_27477986-S | 105    | 132.8  | 99.5   | LOC285141  | <a href="#">XM_209489.1</a> |          |
| GI_27478003-S | 108    | 117.9  | 106.5  | LOC151760  | <a href="#">XM_098117.3</a> |          |
| GI_27478061-S | 105.4  | 114.6  | 107.7  | DKFZP434B1 | <a href="#">XM_046264.6</a> |          |
| GI_27478065-S | 141.4  | 147.4  | 140.7  | LOC285344  | <a href="#">XM_211853.1</a> |          |
| GI_27478147-S | 304.8  | 303.4  | 344.6  | LOC138428  | <a href="#">XM_059972.6</a> |          |
| GI_27478170-S | 265.4  | 289.5  | 292.7  | LOC131909  | <a href="#">XM_067605.3</a> |          |
| GI_27478393-S | 337.3  | 311.8  | 315.7  | LOC285919  | <a href="#">XM_212094.1</a> |          |
| GI_27478465-S | 76.2   | 77.4   | 77.3   | LOC255220  | <a href="#">XM_171207.2</a> |          |
| GI_27478473-S | 95.4   | 100.2  | 96.5   | KIAA1962   | <a href="#">XM_088567.5</a> |          |
| GI_27478680-S | 101.4  | 101.2  | 103.2  | LOC286114  | <a href="#">XM_212178.1</a> |          |
| GI_27478728-S | 152.1  | 165.5  | 151.9  | LOC149643  | <a href="#">XM_086616.2</a> |          |
| GI_27478738-S | 1102.1 | 706.2  | 828    | LOC286343  | <a href="#">XM_210019.1</a> | MGC46502 |
| GI_27478846-S | 107.1  | 116.6  | 108.5  | LOC136242  | <a href="#">XM_059830.4</a> |          |
| GI_27478849-S | 123.6  | 134.8  | 131.1  | LOC375748  | <a href="#">XM_088578.6</a> |          |
| GI_27478973-S | 192.6  | 224.2  | 203.7  | LOC284623  | <a href="#">XM_211557.1</a> |          |
| GI_27479013-S | 139.1  | 136.6  | 134.1  | LOC285694  | <a href="#">XM_211983.1</a> |          |
| GI_27479022-S | 115.8  | 126.9  | 114.2  | LOC285697  | <a href="#">XM_210642.1</a> |          |
| GI_27479090-S | 108.1  | 112.3  | 98.7   | LOC157813  | <a href="#">XM_098828.2</a> |          |
| GI_27479107-S | 108.3  | 104.4  | 109    | LOC286187  | <a href="#">XM_209936.1</a> |          |
| GI_27479150-S | 90.3   | 99.4   | 100.8  | SV2C       | <a href="#">XM_043493.5</a> |          |
| GI_27479154-S | 94.5   | 87.3   | 96     | LOC285711  | <a href="#">XM_211988.1</a> |          |
| GI_27479226-S | 1083.6 | 1608.4 | 838.6  | ZNF36      | <a href="#">XM_168302.2</a> |          |
| GI_27479240-S | 100.5  | 87.5   | 91.8   | LOC285995  | <a href="#">XM_212123.1</a> |          |
| GI_27479310-S | 100.3  | 93.3   | 95.5   | LOC285721  | <a href="#">XM_211995.1</a> |          |
| GI_27479404-S | 155.3  | 151.4  | 121.6  | LOC283553  | <a href="#">XM_211086.1</a> |          |
| GI_27479422-S | 234.4  | 252.8  | 283.9  | C14orf35   | <a href="#">XM_058661.6</a> |          |
| GI_27479430-S | 2774.5 | 3041.5 | 2812.3 | KIAA1393   | <a href="#">XM_050793.4</a> |          |

|               |        |        |        |            |                             |              |
|---------------|--------|--------|--------|------------|-----------------------------|--------------|
| GI_27479432-S | 131.6  | 157.1  | 141.2  | LOC161291  | <a href="#">XM_090844.2</a> |              |
| GI_27479471-S | 389.5  | 837    | 543.7  | KIAA1130   | <a href="#">XM_031104.5</a> |              |
| GI_27479546-S | 113.8  | 106.3  | 106    | LOC283583  | <a href="#">XM_211092.1</a> |              |
| GI_27479548-S | 93.3   | 92.2   | 87.6   | LOC283584  | <a href="#">XM_211108.1</a> |              |
| GI_27479552-S | 98.5   | 96.6   | 92.8   | LOC283586  | <a href="#">XM_211089.1</a> |              |
| GI_27479554-S | 107.8  | 101.5  | 109.2  | LOC283587  | <a href="#">XM_211090.1</a> |              |
| GI_27479730-S | 150    | 163.3  | 155.1  | LOC285423  | <a href="#">XM_209604.1</a> |              |
| GI_27479781-S | 94.4   | 103.2  | 88.4   | LOC203806  | <a href="#">XM_114973.3</a> |              |
| GI_27479816-S | 101.4  | 101.4  | 97.6   | LOC253017  | <a href="#">XM_171068.2</a> |              |
| GI_27479851-S | 82.8   | 99.1   | 82.3   | LOC284532  | <a href="#">XM_210119.1</a> |              |
| GI_27479896-S | 227.3  | 257.9  | 227.1  | LOC285018  | <a href="#">XM_210394.1</a> |              |
| GI_27479970-S | 185.4  | 141.2  | 136.5  | KIAA1604   | <a href="#">XM_034594.7</a> |              |
| GI_27480047-S | 94.4   | 90.1   | 95     | LOC255130  | <a href="#">XM_173119.2</a> |              |
| GI_27480070-S | 95.7   | 102.7  | 97.2   | LOC254827  | <a href="#">XM_173084.2</a> |              |
| GI_27480158-S | 210.8  | 247.4  | 192    | LOC255798  | <a href="#">XM_173087.2</a> |              |
| GI_27480483-S | 103.9  | 101.3  | 102.9  | LOC285501  | <a href="#">XM_209640.1</a> |              |
| GI_27480510-S | 259.9  | 364.8  | 326.9  | LOC284646  | <a href="#">XM_211573.1</a> |              |
| GI_27480565-S | 154.3  | 166    | 155.8  | LOC285509  | <a href="#">XM_211923.1</a> |              |
| GI_27480622-S | 135.4  | 142.4  | 139.8  | LOC285510  | <a href="#">XM_209643.1</a> |              |
| GI_27480767-S | 121.7  | 125.4  | 107.8  | LOC285299  | <a href="#">XM_209554.1</a> |              |
| GI_27480778-S | 274.6  | 321.8  | 321.9  | LOC286224  | <a href="#">XM_209959.1</a> |              |
| GI_27480863-S | 234.2  | 238.2  | 241.7  | KIAA0375   | <a href="#">XM_048462.4</a> |              |
| GI_27480910-S | 2371.5 | 1999.8 | 1933.5 | LOC286257  | <a href="#">XM_209971.1</a> |              |
| GI_27481114-S | 223.5  | 253.5  | 230.6  | LOC285890  | <a href="#">XM_212067.1</a> |              |
| GI_27481123-S | 1414.9 | 1220.7 | 1353.2 | KIAA1078   | <a href="#">XM_036589.3</a> |              |
| GI_27481171-S | 375.8  | 475.8  | 432.1  | SMYD5      | <a href="#">XM_039548.3</a> |              |
| GI_27481242-S | 276.7  | 311.5  | 293.1  | LOC285435  | <a href="#">XM_211896.1</a> |              |
| GI_27481296-S | 105.6  | 107.3  | 103.8  | LOC255654  | <a href="#">XM_173036.2</a> |              |
| GI_27481390-S | 109.9  | 108.7  | 96     | LOC164045  | <a href="#">XM_089318.2</a> |              |
| GI_27481457-S | 117.1  | 115.4  | 113    | LOC127391  | <a href="#">XM_059140.3</a> |              |
| GI_27481474-S | 101.6  | 104.9  | 103.4  | LOC285382  | <a href="#">XM_211871.1</a> |              |
| GI_27481547-S | 967.3  | 1077.7 | 618.3  | PRICKLE2   | <a href="#">XM_093799.2</a> | DKFZp686D143 |
| GI_27481826-S | 97.8   | 93.8   | 91.2   | LOC286076  | <a href="#">XM_209889.1</a> |              |
| GI_27481852-S | 90.5   | 105.9  | 83.6   | DKFZp434H2 | <a href="#">XM_043863.4</a> |              |
| GI_27481868-S | 171.6  | 191.3  | 182.2  | LOC133923  | <a href="#">XM_068602.3</a> |              |
| GI_27481869-S | 138.9  | 167.9  | 139.2  | LOC153441  | <a href="#">XM_087671.3</a> |              |
| GI_27481917-S | 138.9  | 162.2  | 150.4  | LOC118461  | <a href="#">XM_060969.2</a> |              |
| GI_27481959-S | 116.7  | 128    | 127.3  | LOC153364  | <a href="#">XM_087657.4</a> | MGC46734     |
| GI_27482200-S | 98.8   | 98.8   | 84     | LOC142910  | <a href="#">XM_084377.3</a> |              |
| GI_27482549-S | 183.9  | 222.4  | 201.6  | LOC283530  | <a href="#">XM_211079.1</a> |              |
| GI_27482629-S | 92.4   | 100.3  | 113.6  | DKFZp547H0 | <a href="#">XM_085234.2</a> |              |
| GI_27482679-S | 160.2  | 172.8  | 171.8  | LOC283071  | <a href="#">XM_208502.1</a> |              |
| GI_27482725-S | 92     | 99.9   | 94.3   | C6orf212   | <a href="#">XM_069035.4</a> |              |
| GI_27482800-S | 341.4  | 352.9  | 339.7  | ZNF18      | <a href="#">XM_085596.3</a> |              |



|               |       |        |        |           |                             |       |
|---------------|-------|--------|--------|-----------|-----------------------------|-------|
| GI_27482884-S | 120.1 | 128.2  | 125.2  | LOC222553 | <a href="#">XM_167044.2</a> |       |
| GI_27482991-S | 613.2 | 653.6  | 552.6  | LOC284064 | <a href="#">XM_210334.1</a> |       |
| GI_27482999-S | 106.1 | 116.6  | 101    | LOC284067 | <a href="#">XM_208990.1</a> |       |
| GI_27483117-S | 96.2  | 102.4  | 91.8   | LOC123722 | <a href="#">XM_058721.6</a> |       |
| GI_27483409-S | 94.8  | 105.4  | 82     | FLJ40311  | <a href="#">XM_064190.2</a> |       |
| GI_27483466-S | 877.8 | 1103.7 | 1009.2 | LOC283710 | <a href="#">XM_211174.1</a> |       |
| GI_27483536-S | 98.9  | 95.7   | 94.1   | LOC283724 | <a href="#">XM_208806.1</a> |       |
| GI_27483643-S | 200.1 | 236.4  | 224.6  | LOC285770 | <a href="#">XM_209753.1</a> |       |
| GI_27483664-S | 95.1  | 95.9   | 93.4   | LOC285777 | <a href="#">XM_212013.1</a> |       |
| GI_27484056-S | 786.5 | 1150.2 | 1336.8 | LOC284120 | <a href="#">XM_211339.1</a> |       |
| GI_27484243-S | 174.5 | 190.6  | 161.9  | LOC197135 | <a href="#">XM_113825.2</a> |       |
| GI_27484363-S | 1025  | 633.5  | 582.2  | LOC284134 | <a href="#">XM_211345.1</a> |       |
| GI_27484425-S | 608   | 533.6  | 482.8  | SYTL3     | <a href="#">XM_087804.2</a> |       |
| GI_27484664-S | 429.5 | 485.2  | 449.5  | LOC283780 | <a href="#">XM_211197.1</a> |       |
| GI_27484731-S | 390.1 | 461.7  | 872.3  | KIAA1944  | <a href="#">XM_062545.5</a> |       |
| GI_27484970-S | 99.7  | 98     | 88.6   | LOC283365 | <a href="#">XM_210242.1</a> |       |
| GI_27485028-S | 118.7 | 136    | 132.4  | FLJ35258  | <a href="#">XM_209112.1</a> |       |
| GI_27485046-S | 484.7 | 457.3  | 495.3  | LOC126208 | <a href="#">XM_058999.7</a> |       |
| GI_27485087-S | 110.1 | 116.4  | 105.1  | LOC284275 | <a href="#">XM_211413.1</a> |       |
| GI_27485109-S | 163.5 | 175.5  | 169.5  | LOC283129 | <a href="#">XM_208524.1</a> |       |
| GI_27485197-S | 114.4 | 107.6  | 97.9   | KIAA1829  | <a href="#">XM_030378.2</a> |       |
| GI_27485201-S | 123.3 | 132.1  | 115.3  | LOC284318 | <a href="#">XM_209149.1</a> |       |
| GI_27485203-S | 143.7 | 136.7  | 145.9  | IMUP      | <a href="#">XM_085984.4</a> | H2RSP |
| GI_27485209-S | 123.9 | 129.7  | 133.2  | LOC284321 | <a href="#">XM_211432.1</a> |       |
| GI_27485221-S | 199.8 | 266.5  | 232.7  | TIM50L    | <a href="#">XM_053074.6</a> |       |
| GI_27485260-S | 185   | 170.9  | 184.7  | LOC284345 | <a href="#">XM_209138.1</a> |       |
| GI_27485266-S | 120.7 | 119.1  | 109.2  | LOC126298 | <a href="#">XM_065026.2</a> |       |
| GI_27485310-S | 314.6 | 309.5  | 330.6  | ZFP100    | <a href="#">XM_046390.5</a> |       |
| GI_27485318-S | 335.6 | 438    | 375.7  | LOC284363 | <a href="#">XM_209145.1</a> |       |
| GI_27485347-S | 281.6 | 301.2  | 323.2  | LOC90317  | <a href="#">XM_030892.2</a> |       |
| GI_27485351-S | 388.1 | 370.3  | 347.5  | LOC90321  | <a href="#">XM_030896.3</a> |       |
| GI_27485378-S | 108   | 122    | 121.7  | LOC284293 | <a href="#">XM_209104.1</a> |       |
| GI_27485393-S | 174.5 | 212.9  | 191.6  | MGC41903  | <a href="#">XM_058956.6</a> |       |
| GI_27485409-S | 215.5 | 251    | 218.1  | LOC284383 | <a href="#">XM_210382.1</a> |       |
| GI_27485419-S | 125.7 | 122.3  | 148.3  | LOC162993 | <a href="#">XM_091914.2</a> |       |
| GI_27485472-S | 329.7 | 263.6  | 223.7  | FLJ00012  | <a href="#">XM_058426.7</a> |       |
| GI_27485564-S | 172.2 | 206.4  | 188.6  | LOC283403 | <a href="#">XM_211028.1</a> |       |
| GI_27485586-S | 215   | 240.1  | 225.9  | KIAA1442  | <a href="#">XM_044921.4</a> |       |
| GI_27485636-S | 159.1 | 201.6  | 171.5  | LOC283425 | <a href="#">XM_208665.1</a> |       |
| GI_27485880-S | 115.2 | 120    | 168.8  | LOC139067 | <a href="#">XM_066457.2</a> |       |
| GI_27486035-S | 106.2 | 191.3  | 120.7  | LOC203569 | <a href="#">XM_114723.2</a> |       |
| GI_27486087-S | 178.5 | 221.7  | 192.9  | LOC162073 | <a href="#">XM_091331.2</a> |       |
| GI_27486123-S | 231.8 | 223.1  | 180    | KIAA0819  | <a href="#">XM_032996.4</a> |       |
| GI_27486196-S | 91.2  | 85.4   | 91.9   | LOC286441 | <a href="#">XM_212319.1</a> |       |

|               |        |       |        |            |                             |
|---------------|--------|-------|--------|------------|-----------------------------|
| GI_27486209-S | 136.9  | 162.1 | 134.6  | BEAN       | <a href="#">XM 085374.2</a> |
| GI_27486285-S | 289.3  | 339   | 308    | LOC284931  | <a href="#">XM 211694.1</a> |
| GI_27486596-S | 170.1  | 203.1 | 187    | LOC170242  | <a href="#">XM 093201.2</a> |
| GI_27497798-S | 164.7  | 170.1 | 155.6  | LOC148640  | <a href="#">XM 086257.2</a> |
| GI_27497804-S | 163.6  | 166.6 | 150.7  | LOC284527  | <a href="#">XM 211509.1</a> |
| GI_27497918-S | 152    | 171.2 | 174.1  | LOC151363  | <a href="#">XM 087182.2</a> |
| GI_27497943-S | 114.4  | 123.4 | 114.9  | KIAA1486   | <a href="#">XM 041126.5</a> |
| GI_27498044-S | 98.9   | 92.9  | 102.7  | KIAA0935   | <a href="#">XM 052620.7</a> |
| GI_27498253-S | 113.4  | 116.5 | 99.6   | LOC133993  | <a href="#">XM 068632.3</a> |
| GI_27498268-S | 101.5  | 99.2  | 98     | FLJ40584   | <a href="#">XM 069189.2</a> |
| GI_27498358-S | 153.5  | 162.7 | 149    | IRAK1BP1   | <a href="#">XM 059729.3</a> |
| GI_27498382-S | 204.2  | 228.1 | 228.9  | LOC285793  | <a href="#">XM 212022.1</a> |
| GI_27498388-S | 150.5  | 168.5 | 165.9  | LOC168002  | <a href="#">XM 094794.2</a> |
| GI_27498432-S | 115.6  | 115.2 | 105.7  | LOC254751  | <a href="#">XM 173173.2</a> |
| GI_27498465-S | 152.4  | 148.4 | 126.7  | LOC222701  | <a href="#">XM 167152.3</a> |
| GI_27498471-S | 224.1  | 263.7 | 238.9  | ZNF453     | <a href="#">XM 167147.2</a> |
| GI_27498545-S | 288.2  | 442.5 | 521.9  | LOC154467  | <a href="#">XM 166346.2</a> |
| GI_27498554-S | 146.7  | 170.8 | 151.6  | LOC222642  | <a href="#">XM 167072.3</a> |
| GI_27498571-S | 528.5  | 508.1 | 386    | KIAA0240   | <a href="#">XM 166479.2</a> |
| GI_27498864-S | 185    | 204.1 | 182    | BA526D8.4  | <a href="#">XM 046861.2</a> |
| GI_27498920-S | 101    | 112.2 | 102.6  | LOC255022  | <a href="#">XM 171370.2</a> |
| GI_27498926-S | 174.2  | 186.2 | 127.3  | FLJ35908   | <a href="#">XM 089747.2</a> |
| GI_27498946-S | 368.9  | 481.7 | 417.7  | MRF2       | <a href="#">XM 084482.3</a> |
| GI_27499036-S | 93.5   | 93.3  | 91     | LOC283065  | <a href="#">XM 210876.1</a> |
| GI_27499039-S | 98.5   | 113.1 | 135.5  | DKFZp667B0 | <a href="#">XM 171410.2</a> |
| GI_27499073-S | 304.2  | 365.3 | 337.6  | KIAA0298   | <a href="#">XM 084529.6</a> |
| GI_27499130-S | 184.9  | 198.3 | 186.3  | KIAA1201   | <a href="#">XM 208530.1</a> |
| GI_27499140-S | 185.3  | 232.3 | 207.3  | LOC283162  | <a href="#">XM 210186.1</a> |
| GI_27499154-S | 147.1  | 161.4 | 140.1  | LOC283166  | <a href="#">XM 210906.1</a> |
| GI_27499230-S | 139.7  | 166.6 | 138.3  | LOC219527  | <a href="#">XM 166856.3</a> |
| GI_27499430-S | 137    | 156   | 147.9  | LOC283297  | <a href="#">XM 208604.1</a> |
| GI_27499434-S | 337.8  | 476.6 | 477.5  | PPFIBP2    | <a href="#">XM 084578.6</a> |
| GI_27499637-S | 102.2  | 100.2 | 91.1   | LOC283440  | <a href="#">XM 211040.1</a> |
| GI_27499680-S | 2814.9 | 2953  | 2703.2 | GCN1L1     | <a href="#">XM 045792.8</a> |
| GI_27500051-S | 109.6  | 122.2 | 111    | LOC283895  | <a href="#">XM 211244.1</a> |
| GI_27500171-S | 200.4  | 224.4 | 217.1  | KIAA0339   | <a href="#">XM 049380.2</a> |
| GI_27500290-S | 88     | 83.5  | 88.1   | LOC283994  | <a href="#">XM 211291.1</a> |
| GI_27500473-S | 182.3  | 219.6 | 206.1  | LOC284158  | <a href="#">XM 209041.1</a> |
| GI_27500527-S | 116    | 138.4 | 115    | LOC284184  | <a href="#">XM 211367.1</a> |
| GI_27500713-S | 100.6  | 118.1 | 119.6  | LOC284307  | <a href="#">XM 209111.1</a> |
| GI_27500767-S | 84.5   | 95.7  | 81     | LOC284379  | <a href="#">XM 209163.1</a> |
| GI_27500805-S | 118.5  | 130.1 | 118    | LOC126167  | <a href="#">XM 058997.5</a> |
| GI_27500902-S | 261.2  | 305.3 | 297.5  | DKFZp761G1 | <a href="#">XM 036218.4</a> |
| GI_27501092-S | 226.9  | 274.7 | 250.1  | LOC150051  | <a href="#">XM 097792.2</a> |

|               |        |        |        |           |                             |                                        |             |                          |
|---------------|--------|--------|--------|-----------|-----------------------------|----------------------------------------|-------------|--------------------------|
| GI_27501193-S | 115.8  | 124.5  | 106.9  | LOC91353  | <a href="#">XM_018487.3</a> |                                        |             |                          |
| GI_27501210-S | 108.6  | 93.2   | 99.1   | LOC284901 | <a href="#">XM_209408.1</a> |                                        |             |                          |
| GI_27501258-S | 442    | 602.8  | 547.8  | KIAA1093  | <a href="#">XM_039385.2</a> |                                        |             |                          |
| GI_27501300-S | 174.9  | 214.1  | 194.7  | FLJ20573  | <a href="#">XM_033853.2</a> |                                        |             |                          |
| GI_27501317-S | 111.5  | 112.7  | 114    | KIAA1202  | <a href="#">XM_050478.2</a> |                                        |             |                          |
| GI_27501414-S | 173.9  | 189.6  | 171.9  | LOC286478 | <a href="#">XM_212326.1</a> |                                        |             |                          |
| GI_27501445-S | 2382.9 | 2135.6 | 1038.8 | DENR      | <a href="#">NM_003677.2</a> | DRP;DRP1;SMAP-3                        | translation | cellular_co intracellula |
| GI_27501451-S | 122.3  | 131.5  | 137.3  | SPRY3     | <a href="#">NM_005840.1</a> | HSPRY3                                 | molecular   | membran histogene        |
| GI_27501455-S | 190.5  | 199.9  | 184.6  | CHDH      | <a href="#">NM_018397.1</a> |                                        | oxidoredu   | electron                 |
| GI_27501457-S | 929.7  | 596.4  | 666.5  | CHTF18    | <a href="#">NM_022092.1</a> | CHL12;Ctf18;C16orf41;C321D2.4          | nucleotide  | DNA DNA                  |
| GI_27501463-S | 312.1  | 379    | 339.7  | STK29     | <a href="#">NM_003957.1</a> | BRSK2;PEN11B;C11orf7                   | cAMP-       | protein                  |
| GI_27502371-I | 83.8   | 91.6   | 94.4   | SPAG8     | <a href="#">NM_012436.2</a> | SMP1;BS-84;HSD-1;SPAG3;hSMP-           |             |                          |
| GI_27502372-A | 113    | 125.3  | 117.2  | SPAG8     | <a href="#">NM_172312.1</a> | SMP1;BS-84;HSD-1;SPAG3;hSMP-           |             |                          |
| GI_27502374-I | 96.5   | 87.1   | 87.8   | MEIS2     | <a href="#">NM_002399.2</a> | MRG1;MGC2820;HsT18361                  | transcripti | negative                 |
| GI_27502380-A | 301.3  | 402    | 495.6  | MEIS2     | <a href="#">NM_172315.1</a> | MRG1;MGC2820;HsT18361                  | transcripti | negative                 |
| GI_27502382-I | 109.8  | 129.8  | 120.2  | MEIS2     | <a href="#">NM_172316.1</a> | MRG1;MGC2820;HsT18361                  | transcripti | negative                 |
| GI_27502385-I | 97.7   | 97.3   | 90.2   | NFATC1    | <a href="#">NM_172387.1</a> | NFAT2;NFATC;NF-ATC                     | transcripti | nucleus transcripti      |
| GI_27502389-S | 492.6  | 609.3  | 506.9  | IL18      | <a href="#">NM_001562.2</a> | IGIF;IL-18;IL-1g;IL1F4;MGC12320        | cytokine    | extracellul immune       |
| GI_27502392-A | 99.9   | 99.6   | 97.6   | NFATC1    | <a href="#">NM_172390.1</a> | NFAT2;NFATC;NF-ATC                     | transcripti | nucleus transcripti      |
| GI_27502392-I | 119.6  | 144    | 127.5  | NFATC1    | <a href="#">NM_172390.1</a> | NFAT2;NFATC;NF-ATC                     | transcripti | nucleus transcripti      |
| GI_27502394-I | 98.7   | 100.5  | 115.3  | IL18BP    | <a href="#">NM_005699.2</a> | IL18BPa                                | signal      | soluble immune           |
| GI_27502399-A | 105.4  | 95.9   | 94.6   | IL18BP    | <a href="#">NM_173044.1</a> | IL18BPa                                | signal      | soluble immune           |
| GI_27502399-I | 97.8   | 112.3  | 92.7   | IL18BP    | <a href="#">NM_173044.1</a> | IL18BPa                                | signal      | soluble immune           |
| GI_27502404-A | 2240.6 | 2331.3 | 2514.6 | MCP       | <a href="#">NM_172350.1</a> | TLX;CD46;MIC10;TRA2.10;MGC26544        | receptor    | integral to virulence    |
| GI_27502428-S | 79.6   | 85.3   | 81.2   | ABCA10    | <a href="#">NM_080282.2</a> | EST698739                              |             |                          |
| GI_27532981-I | 262.6  | 233.8  | 254.8  | C10orf6   | <a href="#">NM_018121.2</a> | FLJ10512;FLJ25012                      |             |                          |
| GI_27532983-A | 409.7  | 469.3  | 333.2  | MIZ1      | <a href="#">NM_173206.1</a> | SIZ2;PIASX-BETA;PIASX-ALPHA            | zinc ion    | nucleus                  |
| GI_27532983-I | 78.1   | 77.6   | 78.3   | MIZ1      | <a href="#">NM_173206.1</a> | SIZ2;PIASX-BETA;PIASX-ALPHA            | zinc ion    | nucleus                  |
| GI_27544926-S | 190.5  | 229.1  | 224    | ORMDL3    | <a href="#">NM_139280.1</a> |                                        |             |                          |
| GI_27544938-S | 2420.5 | 2672.8 | 2394.4 | C3orf10   | <a href="#">NM_018462.3</a> | MDS027;HSPC300                         |             |                          |
| GI_27544940-S | 129.9  | 146.1  | 121.8  | MYO1F     | <a href="#">NM_012335.2</a> |                                        | actin       | unconvent biological_    |
| GI_27545314-S | 981.1  | 978.6  | 868.2  | LOC51204  | <a href="#">NM_016360.2</a> |                                        |             |                          |
| GI_27545318-S | 333.5  | 378.8  | 339.8  | POU3F1    | <a href="#">NM_002699.2</a> | OCT6;OTF6;SCIP                         | transcripti | nucleus nerve            |
| GI_27545320-S | 5051.4 | 7964.8 | 6770.1 | C1orf8    | <a href="#">NM_004872.3</a> | HSPC001                                |             | integral to              |
| GI_27545321-S | 107.8  | 117.8  | 103.9  | C4BPB     | <a href="#">NM_000716.2</a> | C4BP                                   |             | compleme                 |
| GI_27545325-S | 386.5  | 433    | 380.2  | SMARCB1   | <a href="#">NM_003073.2</a> | RDT;INI1;SNF5;Snr1;BAF47;Sfh1p;hSNFS;S | tumor       | nucleoplas DNA           |
| GI_27545327-A | 207    | 204.8  | 191.1  | LRRC2     | <a href="#">NM_024750.2</a> |                                        |             |                          |
| GI_27545327-I | 101.4  | 107    | 105.6  | LRRC2     | <a href="#">NM_024750.2</a> |                                        |             |                          |
| GI_27545335-S | 584.1  | 538.5  | 596.3  | FLJ10375  | <a href="#">NM_018075.2</a> | MGC47890                               |             |                          |
| GI_27545441-S | 96.2   | 98.3   | 87.9   | NCR1      | <a href="#">NM_004829.3</a> | LY94;NKP46;NK-p46                      | receptor    | integral to killer       |
| GI_27545446-S | 2068.8 | 2579.3 | 2226.9 | SYBL1     | <a href="#">NM_005638.3</a> | VAMP7;VAMP-7;TI-VAMP                   |             |                          |
| GI_27545448-S | 754.4  | 497.2  | 541.9  | TRPC1     | <a href="#">NM_003304.3</a> | TRP1;HTRP-1                            | store-      | integral to calcium      |
| GI_27545449-S | 1151.1 | 1507.5 | 1385.1 | KCTD3     | <a href="#">NM_016121.2</a> | NY-REN-45                              | tumor       |                          |
| GI_27552756-S | 151    | 162.8  | 162.7  | UGT2B10   | <a href="#">NM_001075.2</a> |                                        | UDP-        | microsom lipid           |

|               |        |        |        |           |                             |                                   |               |             |            |
|---------------|--------|--------|--------|-----------|-----------------------------|-----------------------------------|---------------|-------------|------------|
| GI_27552758-S | 149.4  | 126.2  | 126.8  | RCP9      | <a href="#">NM_014478.3</a> | RCP;Crp;CGRP-RCP                  | calcitonin    | cellular_co | acrosome   |
| GI_27552763-S | 633.4  | 615.1  | 927.5  | NGX6      | <a href="#">NM_016446.2</a> |                                   |               |             |            |
| GI_27552771-S | 90     | 89.6   | 93.3   | NPY2R     | <a href="#">NM_000910.2</a> |                                   | calcium       | integral to | G-protein  |
| GI_27597060-S | 371.7  | 502.5  | 461.5  | C6orf133  | <a href="#">NM_015255.1</a> | UBR2;KIAA0349;bA49A4.1;dJ392M17.3 | transporte    |             | transport  |
| GI_27597074-S | 1005.9 | 1001.3 | 724.9  | ITGB3BP   | <a href="#">NM_014288.3</a> | NRIF3;TAP20;HSU37139              | protein C-    | cytoplasm   | cell       |
| GI_27597077-S | 520.8  | 377    | 441.1  | TYRO3     | <a href="#">NM_006293.2</a> | BYK;RSE                           | transmem      | integral to | cell       |
| GI_27597079-S | 131.7  | 152.7  | 152.3  | CACNA1C   | <a href="#">NM_000719.3</a> | CaV1.2;CCHL1A1;CACNL1A1           | voltage-      | voltage-    | regulation |
| GI_27597081-A | 110.7  | 99.4   | 78.6   | HS6ST2    | <a href="#">NM_147174.2</a> |                                   |               |             |            |
| GI_27597081-I | 143.2  | 135.1  | 147.7  | HS6ST2    | <a href="#">NM_147174.2</a> |                                   |               |             |            |
| GI_27597083-S | 2938.6 | 2478.8 | 2268.3 | METAP2    | <a href="#">NM_006838.2</a> | p67;MNPEP                         | methionyl     |             | regulation |
| GI_27597087-S | 160.2  | 272.8  | 256.8  | CYB561    | <a href="#">NM_001915.2</a> |                                   | cytochrom     | secretory   | energy     |
| GI_27597089-S | 417    | 479.7  | 475.4  | SUPT6H    | <a href="#">NM_003170.2</a> |                                   |               |             |            |
| GI_27597093-S | 513.3  | 627.4  | 494.6  | SNF1LK    | <a href="#">NM_173354.1</a> | MSK                               | protein-      |             | protein    |
| GI_27597101-S | 146.1  | 145.4  | 132.6  | PGGT1B    | <a href="#">NM_005023.2</a> | BGGI;GGTI                         | CAAX-         | CAAX-       | C-terminal |
| GI_27597103-S | 148.4  | 180.7  | 164.6  | K5B       | <a href="#">NM_173352.1</a> |                                   |               |             |            |
| GI_27734089-S | 165.2  | 140.3  | 133.4  | NAV3      | <a href="#">NM_014903.2</a> | POMFIL1;KIAA0938                  | nucleotide    |             |            |
| GI_27734688-S | 126.9  | 143.5  | 130.6  | FLJ36112  | <a href="#">NM_173679.1</a> |                                   |               |             |            |
| GI_27734690-S | 389.7  | 506.8  | 456.5  | FLJ34047  | <a href="#">NM_173669.1</a> |                                   |               |             |            |
| GI_27734692-S | 710.1  | 603.6  | 1025.9 | C14orf80  | <a href="#">NM_173608.1</a> | MGC16771                          |               |             |            |
| GI_27734694-S | 97     | 111.9  | 76.6   | C15orf21  | <a href="#">NM_173609.1</a> | FLJ39426                          |               |             |            |
| GI_27734696-A | 181.1  | 214.2  | 213.9  | KCNRG     | <a href="#">NM_173605.1</a> |                                   |               |             |            |
| GI_27734700-S | 329.8  | 406.5  | 383    | FLJ34278  | <a href="#">NM_173602.1</a> |                                   |               |             |            |
| GI_27734702-S | 9861.6 | 12523  | 10644  | FLJ38426  | <a href="#">NM_173611.1</a> |                                   |               |             |            |
| GI_27734704-S | 89.3   | 100.9  | 93     | FLJ34836  | <a href="#">NM_173668.1</a> |                                   |               |             |            |
| GI_27734706-S | 327.1  | 433.3  | 363.6  | FLJ33768  | <a href="#">NM_173610.1</a> |                                   |               |             |            |
| GI_27734708-S | 5355.4 | 6807.6 | 5701.9 | LOC283820 | <a href="#">NM_173614.1</a> |                                   |               |             |            |
| GI_27734712-S | 244.7  | 296.1  | 258.7  | FLJ35894  | <a href="#">NM_173616.1</a> |                                   |               |             |            |
| GI_27734716-S | 112.7  | 128.9  | 113.6  | OPRD1     | <a href="#">NM_000911.2</a> | OPRD                              | delta-        | integral to | sensory    |
| GI_27734718-S | 129    | 131.9  | 122    | SLC19A2   | <a href="#">NM_006996.1</a> | TC1;THT1;TRMA;THTR1               | transporte    | integral to | small      |
| GI_27734720-S | 358.2  | 453.8  | 293.4  | PDE8A     | <a href="#">NM_002605.1</a> | HsT19550                          | 3',5'-cyclic- | cellular_co | cyclic     |
| GI_27734722-S | 138    | 138.7  | 137.7  | FLJ37396  | <a href="#">NM_173671.1</a> |                                   |               |             |            |
| GI_27734726-S | 523.8  | 473.2  | 488.3  | FLJ90652  | <a href="#">NM_173618.1</a> |                                   |               |             |            |
| GI_27734731-S | 201.1  | 233.5  | 232.3  | FLJ36701  | <a href="#">NM_173617.1</a> |                                   |               |             |            |
| GI_27734733-S | 1520.8 | 1019.2 | 1003.2 | FLJ23825  | <a href="#">NM_173620.1</a> |                                   |               |             |            |
| GI_27734735-S | 86.7   | 90.9   | 84.4   | MGC34761  | <a href="#">NM_173619.1</a> |                                   |               |             |            |
| GI_27734737-S | 253.3  | 268.7  | 215.9  | FLJ36674  | <a href="#">NM_173622.1</a> |                                   |               |             |            |
| GI_27734739-S | 156.8  | 194.5  | 195    | RGMB      | <a href="#">NM_173670.1</a> | FLJ90406                          |               |             |            |
| GI_27734741-S | 108.3  | 110.3  | 107.7  | FLJ34790  | <a href="#">NM_173621.1</a> |                                   |               |             |            |
| GI_27734743-S | 130.2  | 160.4  | 139.1  | FLJ40504  | <a href="#">NM_173624.1</a> |                                   |               |             |            |
| GI_27734745-S | 229.5  | 284.9  | 250.5  | FLJ35808  | <a href="#">NM_173623.1</a> |                                   |               |             |            |
| GI_27734747-S | 504    | 509.6  | 507.1  | SLC26A11  | <a href="#">NM_173626.1</a> | MGC46523                          | sulfate       | membran     | sulfate    |
| GI_27734756-S | 97.4   | 104.6  | 96.1   | FLJ40457  | <a href="#">NM_173628.1</a> |                                   |               |             |            |
| GI_27734760-S | 969.1  | 920.9  | 953.1  | FLJ32440  | <a href="#">NM_173685.1</a> |                                   |               |             |            |
| GI_27734762-S | 134.9  | 147.9  | 131.4  | FLJ25694  | <a href="#">NM_173604.1</a> |                                   |               |             |            |

|               |        |        |        |              |                             |                     |             |                        |
|---------------|--------|--------|--------|--------------|-----------------------------|---------------------|-------------|------------------------|
| GI_27734764-S | 126.2  | 153.9  | 124.9  | FLJ40126     | <a href="#">NM_173599.1</a> |                     |             |                        |
| GI_27734768-S | 116.7  | 115.5  | 118.2  | FLJ37587     | <a href="#">NM_173597.1</a> |                     |             |                        |
| GI_27734774-S | 89.7   | 81.9   | 105    | FLJ37659     | <a href="#">NM_173698.1</a> |                     |             |                        |
| GI_27734776-S | 149.4  | 192.6  | 168    | SLC39A5      | <a href="#">NM_173596.1</a> | MGC34778            | heavy       | membran heavy          |
| GI_27734778-S | 88.2   | 104.2  | 96.1   | FLJ33977     | <a href="#">NM_173666.1</a> |                     |             |                        |
| GI_27734780-S | 103.2  | 107.7  | 106.6  | MGC33889     | <a href="#">NM_173699.1</a> |                     |             |                        |
| GI_27734782-S | 153.6  | 171.4  | 164.9  | B4GalINac-T3 | <a href="#">NM_173593.1</a> | FLJ40362            |             |                        |
| GI_27734786-S | 104.2  | 119.3  | 98.7   | FLJ36102     | <a href="#">NM_173590.1</a> |                     |             |                        |
| GI_27734788-S | 124.9  | 152.8  | 145.9  | FLJ90579     | <a href="#">NM_173591.1</a> |                     |             |                        |
| GI_27734790-S | 90.5   | 86.9   | 83.3   | FLJ37794     | <a href="#">NM_173588.1</a> |                     |             |                        |
| GI_27734794-S | 99.4   | 105.7  | 113.5  | FLJ37543     | <a href="#">NM_173667.1</a> |                     |             |                        |
| GI_27734796-S | 112.5  | 103.8  | 100.9  | MGC34821     | <a href="#">NM_173586.1</a> |                     | transporte  | integral to transport  |
| GI_27734800-S | 90.5   | 89     | 86.1   | FLJ33790     | <a href="#">NM_173583.1</a> |                     |             |                        |
| GI_27734802-S | 87.4   | 88.6   | 80     | FLJ40182     | <a href="#">NM_173696.1</a> |                     |             |                        |
| GI_27734804-S | 417.8  | 528.1  | 489    | MGC45840     | <a href="#">NM_173584.1</a> |                     | calcium     | metabolis              |
| GI_27734806-S | 331    | 348.7  | 303    | FLJ90231     | <a href="#">NM_173581.1</a> |                     | beta-       | beta-                  |
| GI_27734812-S | 172.4  | 214.1  | 188.6  | FLJ40224     | <a href="#">NM_173579.1</a> |                     | DNA         | nucleus                |
| GI_27734814-S | 95.9   | 93.4   | 84     | MGC34713     | <a href="#">NM_173665.1</a> |                     |             | regulation             |
| GI_27734816-S | 107.1  | 112.7  | 110.3  | FLJ39058     | <a href="#">NM_173580.1</a> |                     |             |                        |
| GI_27734818-S | 526.7  | 647.9  | 568.8  | MGC45541     | <a href="#">NM_173577.1</a> |                     |             |                        |
| GI_27734820-S | 154.6  | 180.9  | 165.9  | FLJ90834     | <a href="#">NM_173578.1</a> |                     |             |                        |
| GI_27734824-S | 99     | 100.4  | 96.1   | FLJ33610     | <a href="#">NM_173697.1</a> |                     |             |                        |
| GI_27734826-S | 150.4  | 173.3  | 160.4  | C10orf48     | <a href="#">NM_173576.1</a> | MGC39616            | transcripti | nucleus regulation     |
| GI_27734828-S | 113    | 113.9  | 124.4  | MGC35138     | <a href="#">NM_173573.1</a> |                     |             |                        |
| GI_27734832-S | 93.3   | 98.8   | 101    | MGC33414     | <a href="#">NM_173574.1</a> |                     | electron    | electron               |
| GI_27734834-S | 134    | 122.3  | 99.6   | LOC255313    | <a href="#">NM_173571.1</a> |                     |             |                        |
| GI_27734836-S | 107.9  | 113.5  | 109    | C10orf93     | <a href="#">NM_173572.1</a> | FLJ25954;bB137A17.3 |             |                        |
| GI_27734842-S | 191.1  | 237.8  | 196.5  | FLJ35424     | <a href="#">NM_173661.1</a> |                     |             |                        |
| GI_27734844-S | 460.3  | 336.7  | 555.5  | ZDHHC23      | <a href="#">NM_173570.1</a> | MGC42530            |             |                        |
| GI_27734848-S | 216.4  | 244.7  | 213.2  | MGC34646     | <a href="#">NM_173519.1</a> |                     | transporte  | intracellula transport |
| GI_27734852-S | 86.3   | 79.8   | 78.3   | FLJ36335     | <a href="#">NM_173568.1</a> |                     |             |                        |
| GI_27734854-S | 120.4  | 147.3  | 125.7  | LOC222967    | <a href="#">NM_173565.1</a> |                     |             |                        |
| GI_27734856-S | 578.2  | 729.9  | 656.4  | MGC50372     | <a href="#">NM_173566.1</a> |                     | DNA         | nucleus regulation     |
| GI_27734858-S | 90.9   | 75.3   | 80.4   | LOC285533    | <a href="#">NM_173662.1</a> |                     |             |                        |
| GI_27734860-S | 222    | 285.1  | 261.6  | C6orf146     | <a href="#">NM_173563.1</a> | MGC43581            |             |                        |
| GI_27734864-S | 220    | 288.6  | 248.5  | UNC5CL       | <a href="#">NM_173561.1</a> | MGC34763            |             | signal                 |
| GI_27734868-S | 106.8  | 114.3  | 110.1  | FLJ25791     | <a href="#">NM_173559.1</a> |                     |             |                        |
| GI_27734870-S | 118.7  | 110.1  | 116.8  | RFXDC1       | <a href="#">NM_173560.1</a> | MGC33442;dJ955L16.1 | DNA         | tRNA- regulation       |
| GI_27734872-S | 126.1  | 124.3  | 128    | RNF152       | <a href="#">NM_173557.1</a> | FLJ39176            |             |                        |
| GI_27734876-S | 1116.4 | 921.8  | 1415.2 | MGC34695     | <a href="#">NM_173555.1</a> |                     | trypsin     | proteolysis            |
| GI_27734882-S | 229.5  | 433.8  | 144.6  | FLJ25801     | <a href="#">NM_173553.1</a> |                     |             |                        |
| GI_27734884-S | 91.4   | 109.9  | 95.2   | MGC44593     | <a href="#">NM_173554.1</a> |                     |             |                        |
| GI_27734886-S | 1788.8 | 1519.1 | 1518.3 | MGC29784     | <a href="#">NM_173659.1</a> |                     |             |                        |
| GI_27734888-S | 201    | 217.4  | 201.9  | SAMD6        | <a href="#">NM_173551.1</a> | FLJ36928            |             |                        |

|               |        |        |        |            |                             |                       |              |                          |
|---------------|--------|--------|--------|------------|-----------------------------|-----------------------|--------------|--------------------------|
| GI_27734890-S | 154.4  | 165.3  | 150.2  | FLJ36601   | <a href="#">NM_173695.1</a> |                       |              |                          |
| GI_27734896-S | 91.3   | 88     | 92     | FLJ39553   | <a href="#">NM_173549.1</a> |                       |              |                          |
| GI_27734902-S | 209.6  | 250.1  | 215.3  | ZNF584     | <a href="#">NM_173548.1</a> | nucleic               | intracellula | regulation               |
| GI_27734904-S | 100.3  | 86.2   | 98.1   | C2orf13    | <a href="#">NM_173545.1</a> | MGC47799              |              |                          |
| GI_27734906-S | 208.8  | 248.5  | 201.5  | FLJ90764   | <a href="#">NM_173656.1</a> |                       | nucleus      |                          |
| GI_27734908-S | 120.9  | 151.7  | 116.3  | MGC35097   | <a href="#">NM_173546.1</a> |                       |              |                          |
| GI_27734910-S | 110.4  | 104.2  | 105.9  | FLJ32844   | <a href="#">NM_173543.1</a> |                       |              |                          |
| GI_27734914-S | 207.3  | 239.3  | 206.2  | C10orf91   | <a href="#">NM_173541.1</a> | bA432J24.4            | DNA          | nucleus regulation       |
| GI_27734918-S | 101.2  | 93.1   | 97.6   | ZNF596     | <a href="#">NM_173539.1</a> |                       | nucleic      | intracellula proteolysis |
| GI_27734920-S | 179    | 211.8  | 210.8  | FUT11      | <a href="#">NM_173540.1</a> | MGC33202              | fucosyltra   | membran protein          |
| GI_27734924-S | 111.2  | 112    | 117.7  | FLJ31139   | <a href="#">NM_173657.1</a> |                       |              |                          |
| GI_27734926-S | 95.8   | 107.5  | 89.7   | PNPLA1     | <a href="#">NM_173676.1</a> | FLJ38755;dJ50J22.1    | catalytic    |                          |
| GI_27734928-S | 78     | 105.9  | 77.4   | FLJ35802   | <a href="#">NM_173538.1</a> |                       |              |                          |
| GI_27734934-S | 109.7  | 129.3  | 116.4  | SLC9A9     | <a href="#">NM_173653.1</a> | FLJ35613              | solute:hyd   | integral to regulation   |
| GI_27734936-S | 89.3   | 69.4   | 90.2   | FLJ35838   | <a href="#">NM_173532.1</a> |                       |              |                          |
| GI_27734940-S | 87.6   | 82.1   | 76.2   | FLJ36040   | <a href="#">NM_173530.1</a> |                       | nucleic      | nucleus regulation       |
| GI_27734942-S | 109.1  | 115.9  | 98.8   | C9orf84    | <a href="#">NM_173521.1</a> | FLJ32779              |              |                          |
| GI_27734944-S | 79     | 85.9   | 86.4   | ZNF100     | <a href="#">NM_173531.1</a> |                       | nucleic      | intracellula regulation  |
| GI_27734946-S | 105.3  | 98.8   | 102.9  | FLJ38615   | <a href="#">NM_173528.1</a> |                       |              |                          |
| GI_27734950-S | 167.6  | 195.9  | 189.9  | C14orf54   | <a href="#">NM_173526.1</a> | FLJ36130              |              |                          |
| GI_27734952-S | 117.7  | 130.2  | 108.5  | FLJ38964   | <a href="#">NM_173527.1</a> |                       | RAS small    | protein                  |
| GI_27734954-S | 128.3  | 152.6  | 149.9  | DKFZp434C1 | <a href="#">NM_173655.1</a> |                       | protein-     | protein                  |
| GI_27734956-S | 185    | 186.6  | 174.3  | FLJ34780   | <a href="#">NM_173651.1</a> |                       |              |                          |
| GI_27734960-S | 134.7  | 146.4  | 129    | MGC34805   | <a href="#">NM_173525.1</a> |                       |              |                          |
| GI_27734962-S | 150.4  | 163.1  | 155.4  | FLJ36576   | <a href="#">NM_173522.1</a> |                       |              |                          |
| GI_27734964-S | 1321.6 | 941.1  | 1232.6 | C9orf75    | <a href="#">NM_173691.1</a> | FLJ90254              |              |                          |
| GI_27734968-S | 389.8  | 470.8  | 432.8  | FLJ40852   | <a href="#">NM_173677.1</a> |                       |              |                          |
| GI_27734970-S | 176.6  | 201.9  | 186.8  | MGC35463   | <a href="#">NM_173520.1</a> |                       |              |                          |
| GI_27734974-S | 109.5  | 100.1  | 105.3  | MGC34824   | <a href="#">NM_173652.1</a> |                       |              |                          |
| GI_27734978-S | 96.9   | 113.8  | 108.1  | FLJ40722   | <a href="#">NM_173678.1</a> |                       | metallope    | proteolysis              |
| GI_27734980-S | 96.8   | 94.8   | 95.1   | FLJ40288   | <a href="#">NM_173682.1</a> |                       |              |                          |
| GI_27734982-S | 87.9   | 118.4  | 109.9  | FLJ39106   | <a href="#">NM_173629.1</a> |                       |              |                          |
| GI_27734988-S | 346.7  | 391.5  | 376.3  | FLJ90805   | <a href="#">NM_173633.1</a> |                       |              |                          |
| GI_27734993-A | 106.8  | 125.7  | 99.9   | SLC22A17   | <a href="#">NM_016609.2</a> | BOCT;BOIT;hBOIT       | transporte   | integral to transport    |
| GI_27734999-S | 79.3   | 79.4   | 75.3   | FLJ39630   | <a href="#">NM_173688.1</a> |                       |              |                          |
| GI_27735001-S | 275    | 324.7  | 304.3  | FLJ34503   | <a href="#">NM_173673.1</a> |                       |              |                          |
| GI_27735003-S | 83.7   | 87     | 83.6   | C19orf14   | <a href="#">NM_173636.1</a> | FLJ33298;DKFZP434J046 |              |                          |
| GI_27735020-S | 100    | 98.6   | 90.3   | FLJ39415   | <a href="#">NM_173681.1</a> |                       |              |                          |
| GI_27735026-S | 90.8   | 97.4   | 77.6   | FLJ40235   | <a href="#">NM_173635.1</a> |                       |              |                          |
| GI_27735030-S | 299.4  | 354.7  | 343.4  | FLJ35976   | <a href="#">NM_173639.1</a> |                       |              |                          |
| GI_27735032-S | 121.1  | 119.9  | 120.2  | DKFZp434P0 | <a href="#">NM_173466.1</a> |                       |              |                          |
| GI_27735034-S | 232.9  | 203.9  | 223.3  | SLC25A26   | <a href="#">NM_173471.1</a> |                       | binding      | mitochond transport      |
| GI_27735036-S | 1506   | 1362.6 | 1607.9 | LOC93380   | <a href="#">NM_173470.1</a> |                       |              |                          |
| GI_27735038-S | 2253.1 | 2444.7 | 2026.1 | LOC119504  | <a href="#">NM_173473.1</a> |                       |              |                          |

|               |        |        |        |            |                             |                                |            |                        |
|---------------|--------|--------|--------|------------|-----------------------------|--------------------------------|------------|------------------------|
| GI_27735040-S | 137.3  | 168.6  | 159.7  | MGC40179   | <a href="#">NM_173472.1</a> |                                |            |                        |
| GI_27735042-S | 107.7  | 111.1  | 95     | MGC34725   | <a href="#">NM_173637.1</a> | binding                        | mitochond  | transport              |
| GI_27735044-S | 98.2   | 91.8   | 96.2   | PPIL6      | <a href="#">NM_173672.1</a> | MGC41939;bA425D10.6;dJ919F19.1 |            | protein                |
| GI_27735046-S | 424.4  | 508.1  | 435.2  | MGC48972   | <a href="#">NM_173475.1</a> |                                |            |                        |
| GI_27735054-S | 120.5  | 115.6  | 107.7  | LOC126248  | <a href="#">NM_173479.1</a> |                                |            |                        |
| GI_27735056-S | 139.3  | 158.1  | 139.9  | FLJ40137   | <a href="#">NM_173478.1</a> |                                |            | cell cycle             |
| GI_27735058-S | 120.4  | 117    | 119.3  | FLJ33655   | <a href="#">NM_173641.1</a> | ephrin                         | membran    |                        |
| GI_27735060-S | 104.8  | 110.5  | 106.4  | FLJ40906   | <a href="#">NM_173640.1</a> | electron                       | nucleus    | electron               |
| GI_27735062-S | 93.2   | 94.6   | 99.8   | FLJ40365   | <a href="#">NM_173482.1</a> |                                |            |                        |
| GI_27735064-S | 215.7  | 284.4  | 246.4  | DKFZp547G0 | <a href="#">NM_173643.1</a> |                                |            |                        |
| GI_27735068-S | 378.8  | 454    | 386.1  | MGC47816   | <a href="#">NM_173642.1</a> |                                |            | ribosome               |
| GI_27735072-S | 86.6   | 104.4  | 89.1   | FLJ39501   | <a href="#">NM_173483.1</a> | monooxyg                       |            | electron               |
| GI_27735074-S | 263.5  | 183.8  | 241    | LOC132321  | <a href="#">NM_173487.1</a> |                                |            |                        |
| GI_27735076-S | 127    | 131.1  | 142.9  | FLJ37357   | <a href="#">NM_173645.1</a> |                                |            |                        |
| GI_27735084-S | 122.7  | 142.5  | 113.5  | PIP5KL1    | <a href="#">NM_173492.1</a> | PIPKH;MGC46424;bA203J24.5      | 1-         |                        |
| GI_27735086-S | 125.7  | 120.1  | 113.2  | FLJ33860   | <a href="#">NM_173644.1</a> |                                |            |                        |
| GI_27735088-S | 152.4  | 194.5  | 179.7  | LSM11      | <a href="#">NM_173491.1</a> | FLJ38273                       | pre-mRNA   | small mRNA             |
| GI_27735090-S | 119.3  | 105.1  | 98.9   | FLJ30296   | <a href="#">NM_173495.1</a> |                                | hedgehog   | membran                |
| GI_27735092-S | 80.5   | 83.6   | 86.7   | FLJ39502   | <a href="#">NM_173648.1</a> | FLJ26337                       |            |                        |
| GI_27735094-S | 1540.4 | 1419.8 | 1145.6 | LOC139135  | <a href="#">NM_173493.1</a> |                                | signal     | signal                 |
| GI_27735096-S | 146.5  | 183.7  | 178.5  | FLJ39660   | <a href="#">NM_173646.1</a> |                                |            |                        |
| GI_27735098-A | 184.4  | 226.8  | 219.6  | FLJ37306   | <a href="#">NM_173497.1</a> | DKFZp761D0614                  | ubiquitin- | intracellula ubiquitin |
| GI_27735098-I | 112.6  | 121.1  | 127.7  | FLJ37306   | <a href="#">NM_173497.1</a> | DKFZp761D0614                  | ubiquitin- | intracellula ubiquitin |
| GI_27735102-S | 121.9  | 128.3  | 115.6  | MGC44294   | <a href="#">NM_173499.1</a> |                                |            |                        |
| GI_27735104-S | 533.8  | 258.6  | 117.3  | DKFZp434C0 | <a href="#">NM_173498.1</a> |                                |            |                        |
| GI_27735106-S | 162.4  | 187    | 172.5  | DNAJC5G    | <a href="#">NM_173650.1</a> | FLJ40417;CSP-gamma             | chaperone  | electron               |
| GI_27735108-S | 737.7  | 322.9  | 282.3  | LOC146174  | <a href="#">NM_173501.1</a> |                                |            |                        |
| GI_27735114-S | 104.8  | 107.6  | 109.5  | FLJ40172   | <a href="#">NM_173649.1</a> |                                |            |                        |
| GI_27735116-S | 223.4  | 246    | 228.2  | FLJ90661   | <a href="#">NM_173502.1</a> |                                | trypsin    | proteolysis            |
| GI_27735120-S | 88.8   | 90.4   | 86.1   | LOC147463  | <a href="#">NM_173505.1</a> |                                | kinase     |                        |
| GI_27735122-S | 149.8  | 139    | 136.4  | FLJ37131   | <a href="#">NM_173687.1</a> |                                |            |                        |
| GI_27735124-S | 134.9  | 143.5  | 153.2  | FLJ36664   | <a href="#">NM_173690.1</a> |                                |            |                        |
| GI_27735126-S | 326    | 301.2  | 486.3  | SLC35F3    | <a href="#">NM_173508.1</a> | FLJ37712                       |            | membran                |
| GI_27735128-S | 109.3  | 118.3  | 113.5  | FLJ37118   | <a href="#">NM_173507.1</a> |                                |            |                        |
| GI_27735130-S | 197.6  | 215.4  | 220.4  | ALS2CR13   | <a href="#">NM_173511.1</a> | FLJ38771                       |            |                        |
| GI_27735132-S | 454.2  | 505.3  | 610.9  | FLJ33814   | <a href="#">NM_173510.1</a> |                                |            |                        |
| GI_27735136-S | 129    | 153.4  | 133.3  | FLJ39822   | <a href="#">NM_173512.1</a> |                                | amino      | membran amino          |
| GI_27735138-S | 440.5  | 457.7  | 351.3  | MAGI1      | <a href="#">NM_173515.1</a> | FLJ31349                       | protein    | intracellula           |
| GI_27735140-S | 115    | 111    | 93.6   | FLJ33708   | <a href="#">NM_173675.1</a> |                                |            |                        |
| GI_27735142-S | 239.2  | 290.7  | 344.4  | DCBLD1     | <a href="#">NM_173674.1</a> | MGC46341;dJ94G16.1             |            | cell                   |
| GI_27735144-S | 141.2  | 169    | 133.2  | FLJ38464   | <a href="#">NM_173689.1</a> |                                |            |                        |
| GI_27735146-S | 127.5  | 114.7  | 123.9  | FLJ35721   | <a href="#">NM_173684.1</a> |                                |            |                        |
| GI_27735148-S | 306.2  | 331.3  | 319.6  | FLJ90709   | <a href="#">NM_173514.1</a> |                                | amino      | membran amino          |
| GI_27735152-S | 341.1  | 395.8  | 392.2  | VKORC1L1   | <a href="#">NM_173517.1</a> |                                |            |                        |

|               |         |        |        |          |                             |                                        |              |              |             |
|---------------|---------|--------|--------|----------|-----------------------------|----------------------------------------|--------------|--------------|-------------|
| GI_27735154-S | 183.1   | 223.7  | 191.8  | PNLDC1   | <a href="#">NM_173516.1</a> | FLJ40240;dJ195P10.2                    |              |              |             |
| GI_27754147-S | 240     | 276.6  | 261.8  | MGC23270 | <a href="#">NM_152646.2</a> |                                        |              |              |             |
| GI_27754148-S | 358.6   | 401.8  | 315    | GRIPAP1  | <a href="#">NM_020137.2</a> |                                        |              |              |             |
| GI_27754165-S | 152.1   | 169.5  | 156.5  | OR11A1   | <a href="#">NM_013937.2</a> | OR11A2;hs6M1-18;dJ994E9.6              | olfactory    | integral to  | olfaction   |
| GI_27754173-S | 105.7   | 105    | 114.4  | NEGR1    | <a href="#">NM_173808.1</a> | Ntra;KILON;MGC46680                    |              |              |             |
| GI_27754187-S | 202.8   | 343.6  | 192.4  | MTND6    | <a href="#">NM_173714.1</a> |                                        | NADH         | mitochond    | eye         |
| GI_27754191-S | 152.7   | 202.4  | 152.2  | MTND4L   | <a href="#">NM_173712.1</a> |                                        | NADH         | mitochond    | mitochond   |
| GI_27754193-S | 1505.4  | 1886.8 | 1394.3 | MTND5    | <a href="#">NM_173713.1</a> |                                        | NADH         | respiratory  | eye         |
| GI_27754195-S | 28337.5 | 30496  | 24679  | MTND3    | <a href="#">NM_173710.1</a> |                                        | NADH         | mitochond    | mitochond   |
| GI_27754197-S | 5856    | 6962.3 | 4522.4 | MTND4    | <a href="#">NM_173711.1</a> |                                        | electron     | mitochond    | eye         |
| GI_27754199-S | 2094.7  | 2047   | 1264.9 | MTND1    | <a href="#">NM_173708.1</a> |                                        | NADH         | mitochond    | eye         |
| GI_27754201-S | 4932    | 4886.9 | 3513.7 | MTND2    | <a href="#">NM_173709.1</a> |                                        | NADH         | respiratory  | eye         |
| GI_27754203-S | 18286.7 | 19650  | 15289  | MTCO1    | <a href="#">NM_173704.1</a> | COI                                    | aa3-type     | mitochond    | vision      |
| GI_27754205-S | 16927.9 | 19493  | 14886  | MTCO2    | <a href="#">NM_173705.1</a> | COII                                   | aa3-type     | mitochond    | electron    |
| GI_27754207-S | 5818    | 6765.6 | 4166.4 | MTATP6   | <a href="#">NM_173702.1</a> | ATP6                                   | hydrogen     | proton-      | central     |
| GI_27754209-S | 113.5   | 113.7  | 99.2   | MTATP8   | <a href="#">NM_173703.1</a> | ATP8                                   | hydrogen     | proton-      | ATP         |
| GI_27754211-S | 134.9   | 152.7  | 135.7  | NXP3     | <a href="#">NM_007225.1</a> | NPH3                                   | receptor     | extracellul  | neuropepti  |
| GI_27754764-A | 104.5   | 101.1  | 87     | FX1D1    | <a href="#">NM_005031.3</a> | PLM;MGC44983                           | chloride     | integral to  | chloride    |
| GI_27754764-I | 99.7    | 109    | 104.6  | FX1D1    | <a href="#">NM_005031.3</a> | PLM;MGC44983                           | chloride     | integral to  | chloride    |
| GI_27754765-I | 122.5   | 117.2  | 124.5  | FX1D1    | <a href="#">NM_021902.2</a> | PLM;MGC44983                           | chloride     | integral to  | chloride    |
| GI_27754766-I | 222.6   | 246.8  | 240.3  | FX1D2    | <a href="#">NM_021603.2</a> | HOMG2;ATP1G1;MGC12372                  | sodium/po    | sodium/po    | small       |
| GI_27754767-A | 121.4   | 121.8  | 127.1  | FX1D2    | <a href="#">NM_001680.3</a> | HOMG2;ATP1G1;MGC12372                  | sodium/po    | sodium/po    | small       |
| GI_27754767-I | 96.8    | 103.5  | 103.1  | FX1D2    | <a href="#">NM_001680.3</a> | HOMG2;ATP1G1;MGC12372                  | sodium/po    | sodium/po    | small       |
| GI_27754770-A | 93.7    | 83.9   | 77.3   | PCDH1    | <a href="#">NM_002587.3</a> | PC42;PCDH42;MGC45991                   | cell         | intercellula | neurogene   |
| GI_27754770-I | 528.6   | 313.4  | 273    | PCDH1    | <a href="#">NM_002587.3</a> | PC42;PCDH42;MGC45991                   | cell         | intercellula | neurogene   |
| GI_27754772-I | 161.6   | 199.4  | 160    | PCDH1    | <a href="#">NM_032420.2</a> | PC42;PCDH42;MGC45991                   | cell         | intercellula | neurogene   |
| GI_27754774-S | 88.2    | 93.3   | 103.5  | AFM      | <a href="#">NM_001133.2</a> | ALF;ALB2;ALBA                          | carrier      | extracellul  | transport   |
| GI_27754777-A | 255.9   | 307.5  | 275.8  | FCN3     | <a href="#">NM_173452.1</a> | FCNH;HAKA1;MGC22543                    | lectin [goid | microfibril  | heterophili |
| GI_27764860-S | 101.9   | 108.9  | 91.7   | MYH6     | <a href="#">NM_002471.1</a> | MYHC;MYHCA                             | structural   | muscle       | muscle      |
| GI_27764862-S | 9782.2  | 8548.2 | 7217.5 | SLC25A6  | <a href="#">NM_001636.1</a> | ANT3;ANT3Y;MGC17525                    | adenine      | mitochond    | small       |
| GI_27764864-S | 177.9   | 202.1  | 192.9  | CD1A     | <a href="#">NM_001763.1</a> | CD1                                    | protein      | integral to  | antimicrob  |
| GI_27764866-S | 184.3   | 210.7  | 204.9  | SYP      | <a href="#">NM_003179.1</a> |                                        | transporte   | synaptic     | transport   |
| GI_27764872-S | 545.2   | 423.1  | 424.9  | CRLF3    | <a href="#">NM_015986.2</a> | CREME9;CYTOR4;MGC20661                 | receptor     |              |             |
| GI_27764881-S | 143.9   | 104.2  | 273.7  | MLAT4    | <a href="#">NM_018192.2</a> | FLJ10718                               | oxidoredu    |              | protein     |
| GI_27764903-S | 99.2    | 108.2  | 107.5  | FX1D4    | <a href="#">NM_173160.1</a> | CHIF                                   | ion          | membran      | ion         |
| GI_27765075-I | 112.2   | 127.7  | 125.1  | CAPN3    | <a href="#">NM_173088.1</a> | p94;CANP3;LGMD2;nCL-                   | calpain      | intracellula | muscle      |
| GI_27765077-A | 121.3   | 145.3  | 134.3  | CAPN3    | <a href="#">NM_173089.1</a> | p94;CANP3;LGMD2;nCL-                   | calpain      | intracellula | muscle      |
| GI_27765082-I | 131.7   | 174    | 114.9  | CAST     | <a href="#">NM_001750.4</a> | BS-17;MGC9402                          | endopepti    |              |             |
| GI_27765084-I | 474.2   | 533.6  | 505.3  | CAST     | <a href="#">NM_173060.1</a> | BS-17;MGC9402                          | endopepti    |              |             |
| GI_27765086-A | 753     | 819.9  | 736.6  | CAST     | <a href="#">NM_173061.1</a> | BS-17;MGC9402                          | endopepti    |              |             |
| GI_27765086-I | 105.7   | 109.4  | 92.5   | CAST     | <a href="#">NM_173061.1</a> | BS-17;MGC9402                          | endopepti    |              |             |
| GI_27765088-I | 90.2    | 108.3  | 95     | CAST     | <a href="#">NM_173062.1</a> | BS-17;MGC9402                          | endopepti    |              |             |
| GI_27765092-A | 429.5   | 590    | 154.2  | SIAT1    | <a href="#">NM_173217.1</a> | CD75;ST6Gal1;ST6Gall;MGC48859;ST6Gal I | beta-        | Golgi        | humoral     |
| GI_27765094-I | 498.9   | 561.2  | 498.4  | SIAT1    | <a href="#">NM_003032.2</a> | CD75;ST6Gal1;ST6Gall;MGC48859;ST6Gal I | beta-        | Golgi        | humoral     |



|               |        |        |        |           |                             |                                     |             |              |               |
|---------------|--------|--------|--------|-----------|-----------------------------|-------------------------------------|-------------|--------------|---------------|
| GI_27765095-A | 400.3  | 511.8  | 405.4  | SIAT4A    | <a href="#">NM_173344.1</a> | ST3O;SIATFL;MGC9183;ST3GalIA;Gal-   | beta-       | Golgi        | protein       |
| GI_27765097-I | 150.5  | 171.6  | 169.5  | SIAT4A    | <a href="#">NM_003033.2</a> | ST3O;SIATFL;MGC9183;ST3GalIA;Gal-   | beta-       | Golgi        | protein       |
| GI_27765098-S | 222.5  | 322.6  | 242.9  | SIAT4B    | <a href="#">NM_006927.2</a> | ST3GALII;Gal-NAc6S;ST3GalA.2        | beta-       | Golgi        | amino         |
| GI_27777631-S | 1968.4 | 1184.7 | 1279   | SLC9A1    | <a href="#">NM_003047.2</a> | APNH;NHE1                           | pH          | integral to  | small         |
| GI_27777635-S | 1235   | 970.7  | 712.1  | TCF3      | <a href="#">NM_003200.1</a> | E2A;ITF1                            | RNA         | nucleus      | oncogene      |
| GI_27777654-S | 113.7  | 129.9  | 116.4  | MCF2L     | <a href="#">NM_024979.2</a> | DBS;OST;ARHGEF14;FLJ12122;KIAA0362  |             |              |               |
| GI_27777666-S | 150.5  | 158.7  | 133.8  | SLC30A8   | <a href="#">NM_173851.1</a> | ZnT-8                               | cation      | membran      | cation        |
| GI_27777668-S | 122.2  | 113.6  | 122.7  | VN1R4     | <a href="#">NM_173857.1</a> | V1RL4                               | receptor    | integral to  | G-protein     |
| GI_27777672-S | 4233   | 4179.6 | 3462.3 | VN1R2     | <a href="#">NM_173856.1</a> | V1RL2                               | receptor    | integral to  | G-protein     |
| GI_27777674-S | 230.6  | 251.7  | 256.5  | VN1R5     | <a href="#">NM_173858.1</a> | V1RL5                               | receptor    | integral to  | G-protein     |
| GI_27804306-S | 96.4   | 136.7  | 109.5  | SDC2      | <a href="#">NM_002998.1</a> | HSPG;HSPG1;SYND2                    | syndecan    | proteoglyc   | cell          |
| GI_27804312-S | 126.5  | 113.9  | 108.9  | GAL       | <a href="#">NM_015973.2</a> | GALN;GLNN;MGC40167                  |             |              |               |
| GI_27804314-S | 86.6   | 93.1   | 88.7   | HOXC12    | <a href="#">NM_173860.1</a> | HOX3;HOX3F                          | transcripti | nucleus      | regulation    |
| GI_27881480-S | 1707.8 | 2314.3 | 2215.8 | RAC2      | <a href="#">NM_002872.3</a> | Gx;EN-7;HSPC022                     | GTPase      | peripheral   | signal        |
| GI_27881481-S | 300.6  | 378.3  | 383.1  | RIG-I     | <a href="#">NM_014314.2</a> |                                     | nucleotide  |              |               |
| GI_27881483-S | 182.5  | 169.5  | 170.4  | RoXaN     | <a href="#">NM_017590.4</a> | FLJ13787;KIAA1031;DKFZp434K0920     |             |              |               |
| GI_27881485-I | 114    | 131.3  | 134.2  | ZAN       | <a href="#">NM_173055.1</a> |                                     | cell        | integral to  | fertilization |
| GI_27881493-A | 105.4  | 122.3  | 96.1   | ZAN       | <a href="#">NM_173059.1</a> |                                     | cell        | integral to  | fertilization |
| GI_27881504-A | 630.4  | 719.1  | 807.3  | ABCF2     | <a href="#">NM_005692.3</a> | ABC28;M-ABC1;HUSSY-                 | ATP         | mitochond    | small         |
| GI_27881504-I | 167.8  | 154.4  | 132.7  | ABCF2     | <a href="#">NM_005692.3</a> | ABC28;M-ABC1;HUSSY-                 | ATP         | mitochond    | small         |
| GI_27881505-I | 282.3  | 361.2  | 405    | ABCF2     | <a href="#">NM_007189.1</a> | ABC28;M-ABC1;HUSSY-                 | ATP         | mitochond    | small         |
| GI_27883865-S | 539.7  | 595.2  | 559.4  | RIC-8     | <a href="#">NM_021932.4</a> |                                     |             |              |               |
| GI_27885012-S | 134.9  | 149.8  | 131.7  | LOC199675 | <a href="#">NM_174918.1</a> |                                     |             |              |               |
| GI_27886525-A | 180.1  | 221.4  | 184.8  | NFAT5     | <a href="#">NM_173215.1</a> | NFATL1;TONEBP;KIAA0827              | RNA         | nucleus      | excretion     |
| GI_27886525-I | 1567.4 | 1830.2 | 1703.3 | NFAT5     | <a href="#">NM_173215.1</a> | NFATL1;TONEBP;KIAA0827              | RNA         | nucleus      | excretion     |
| GI_27886528-A | 88.2   | 112.2  | 95.2   | ATP2A1    | <a href="#">NM_173201.1</a> | ATP2A;SERCA1                        | adenosine   | smooth       | regulation    |
| GI_27886536-A | 549.5  | 931.8  | 900.2  | ATP2A2    | <a href="#">NM_001681.2</a> | DD;DAR;ATP2B;SERCA2;MGC45367        | calcium-    | microsom     | epidermal     |
| GI_27886536-I | 2358.8 | 2604.4 | 1993.6 | ATP2A2    | <a href="#">NM_001681.2</a> | DD;DAR;ATP2B;SERCA2;MGC45367        | calcium-    | microsom     | epidermal     |
| GI_27886537-I | 776.3  | 1159.9 | 1159   | ATP2A2    | <a href="#">NM_170665.2</a> | DD;DAR;ATP2B;SERCA2;MGC45367        | calcium-    | microsom     | epidermal     |
| GI_27886538-A | 96.1   | 98.7   | 100.5  | NFATC2    | <a href="#">NM_012340.2</a> | NFAT1;NFATP                         | transcripti | cytoplasm    | regulation    |
| GI_27886540-I | 102.4  | 102    | 96.6   | NFATC2    | <a href="#">NM_173091.1</a> | NFAT1;NFATP                         | transcripti | cytoplasm    | regulation    |
| GI_27886542-I | 127.8  | 129.9  | 108.8  | NFATC3    | <a href="#">NM_004555.2</a> | NFAT4;NFATX                         | transcripti | nucleus      | regulation    |
| GI_27886554-I | 141    | 145.7  | 133.7  | NFATC3    | <a href="#">NM_173163.1</a> | NFAT4;NFATX                         | transcripti | nucleus      | regulation    |
| GI_27886556-S | 123.2  | 130.3  | 151.7  | MSX2      | <a href="#">NM_002449.3</a> | FPP;MSH;PFM;CRS2;HOX8;PFM1          | DNA         | nucleus      | skeletal      |
| GI_27886558-A | 302    | 364.9  | 378.2  | NFATC3    | <a href="#">NM_173164.1</a> | NFAT4;NFATX                         | transcripti | nucleus      | regulation    |
| GI_27886558-I | 318    | 364.7  | 345.3  | NFATC3    | <a href="#">NM_173164.1</a> | NFAT4;NFATX                         | transcripti | nucleus      | regulation    |
| GI_27886565-A | 360.7  | 376.2  | 278.5  | MALT1     | <a href="#">NM_173844.1</a> | MLT;MLT1;DKFZp434L132               | caspase     | intracellula | pathogene     |
| GI_27886567-S | 518.2  | 345.1  | 293.1  | MDA5      | <a href="#">NM_022168.2</a> |                                     |             |              |               |
| GI_27886569-I | 122.2  | 155    | 159.2  | MRPL39    | <a href="#">NM_080794.2</a> | L39mt;RPML5;MRP-                    | structural  | mitochond    | biological_   |
| GI_27886581-A | 1457.6 | 1511.7 | 1584   | MRPL39    | <a href="#">NM_017446.2</a> | L39mt;RPML5;MRP-                    | structural  | mitochond    | biological_   |
| GI_27886585-I | 92.2   | 104.7  | 81.9   | PTK2B     | <a href="#">NM_173174.1</a> | PKB;PTK;CAKB;FAK2;PYK2;CADTK;FADK2; | focal       | cytoskelet   | signal        |
| GI_27886587-A | 115.6  | 131    | 112.6  | PTK2B     | <a href="#">NM_173175.1</a> | PKB;PTK;CAKB;FAK2;PYK2;CADTK;FADK2; | focal       | cytoskelet   | signal        |
| GI_27886591-I | 156.2  | 179.7  | 176.4  | PTK2      | <a href="#">NM_153831.2</a> | FAK;FADK;FAK1;pp125FAK              | focal       | cytoskelet   | integrin-     |
| GI_27886592-A | 526.6  | 556    | 675.9  | PTK2      | <a href="#">NM_005607.3</a> | FAK;FADK;FAK1;pp125FAK              | focal       | cytoskelet   | integrin-     |

|               |        |        |        |          |                             |                                             |              |                       |
|---------------|--------|--------|--------|----------|-----------------------------|---------------------------------------------|--------------|-----------------------|
| GI_27886594-S | 145.2  | 161.2  | 155.1  | PTK6     | <a href="#">NM_005975.2</a> | BRK                                         | non-         | protein               |
| GI_27886606-A | 195.6  | 294.3  | 222.7  | PTK7     | <a href="#">NM_152881.2</a> | CCK4                                        | transmem     | proteoglyc signal     |
| GI_27886627-S | 1581.8 | 1651.5 | 1098.2 | FLJ20071 | <a href="#">NM_017653.2</a> | DMC;SMC;FLJ90130                            |              |                       |
| GI_27886630-I | 87     | 95.3   | 85     | CD8B1    | <a href="#">NM_172099.1</a> | Ly3;CD8B;LYT3;Leu2                          |              | integral to           |
| GI_27886632-A | 95.4   | 117    | 91.1   | CD8B1    | <a href="#">NM_172100.1</a> | Ly3;CD8B;LYT3;Leu2                          |              | integral to           |
| GI_27886632-I | 127.4  | 138    | 133.5  | CD8B1    | <a href="#">NM_172100.1</a> | Ly3;CD8B;LYT3;Leu2                          |              | integral to           |
| GI_27886634-I | 92.5   | 105.9  | 96.4   | CD8B1    | <a href="#">NM_172101.1</a> | Ly3;CD8B;LYT3;Leu2                          |              | integral to           |
| GI_27886640-I | 143.2  | 160.9  | 142.1  | CD8A     | <a href="#">NM_001768.4</a> | CD8;MAL;p32;Leu2                            | T-cell       | integral to           |
| GI_27886641-A | 113.3  | 117.9  | 96.4   | CD8A     | <a href="#">NM_171827.1</a> | CD8;MAL;p32;Leu2                            | T-cell       | integral to           |
| GI_27886643-A | 710.1  | 835.8  | 1069.1 | CDC2     | <a href="#">NM_033379.2</a> | CDK1                                        | cyclin-      | nucleus start         |
| GI_27886647-A | 83.3   | 87.5   | 84.9   | KCNH5    | <a href="#">NM_172376.1</a> | EAG2;H-EAG2;Kv10.2                          | voltage-     | integral to cation    |
| GI_27886647-I | 86.6   | 84.6   | 75.6   | KCNH5    | <a href="#">NM_172376.1</a> | EAG2;H-EAG2;Kv10.2                          | voltage-     | integral to cation    |
| GI_27886649-I | 1368.3 | 1474.3 | 1373.6 | KCNH6    | <a href="#">NM_030779.2</a> | ERG2;HERG2;Kv11.2                           | voltage-     | integral to cation    |
| GI_27886650-A | 197.9  | 237.9  | 215.7  | KCNH6    | <a href="#">NM_173092.1</a> | ERG2;HERG2;Kv11.2                           | voltage-     | integral to cation    |
| GI_27886652-I | 102.9  | 100.2  | 93.9   | KCNH7    | <a href="#">NM_033272.2</a> | ERG3;HERG3;Kv11.3;MGC45986                  | voltage-     | integral to cation    |
| GI_27886664-A | 105.2  | 105.1  | 109.2  | KCNH7    | <a href="#">NM_173162.1</a> | ERG3;HERG3;Kv11.3;MGC45986                  | voltage-     | integral to cation    |
| GI_27886664-I | 82.2   | 74.5   | 79.9   | KCNH7    | <a href="#">NM_173162.1</a> | ERG3;HERG3;Kv11.3;MGC45986                  | voltage-     | integral to cation    |
| GI_27886666-S | 98.5   | 109.3  | 103.9  | KCNH8    | <a href="#">NM_144633.2</a> | ELK;ELK1;Kv12.1                             | voltage-     | integral to cation    |
| GI_27886675-I | 109.3  | 101.2  | 107    | KCNIP2   | <a href="#">NM_173194.1</a> | KCHIP2;MGC17241;DKFZp566L1246               |              | calcium               |
| GI_27886679-A | 111.8  | 113.9  | 112.9  | KCNIP2   | <a href="#">NM_173197.1</a> | KCHIP2;MGC17241;DKFZp566L1246               |              | calcium               |
| GI_27886679-I | 316.5  | 407.3  | 354.1  | KCNIP2   | <a href="#">NM_173197.1</a> | KCHIP2;MGC17241;DKFZp566L1246               |              | calcium               |
| GI_27886683-S | 183.7  | 194.9  | 181.3  | KCNIP1   | <a href="#">NM_014592.2</a> | VABP;MGC95;KCHIP1                           | ion          | calcium               |
| GI_27894283-S | 209.7  | 242.5  | 225.2  | P2RX1    | <a href="#">NM_002558.2</a> | P2X1                                        | ATP-         | integral to small     |
| GI_27894284-I | 638.3  | 312.8  | 245    | PACE4    | <a href="#">NM_138325.2</a> | SPC4;PCSK6                                  | subtilase    | proteolysis           |
| GI_27894286-A | 113.9  | 113.1  | 94.6   | PHF7     | <a href="#">NM_173341.1</a> | HSPC045;HSPC226;NYD-                        |              |                       |
| GI_27894288-I | 136.1  | 167.9  | 142.8  | PHF7     | <a href="#">NM_016483.4</a> | HSPC045;HSPC226;NYD-                        |              |                       |
| GI_27894289-A | 826.9  | 803.3  | 637.3  | PIGF     | <a href="#">NM_002643.2</a> | MGC32646;MGC33136                           | ethanolam    | endoplas GPI          |
| GI_27894290-I | 124.4  | 143.1  | 120.7  | PIGF     | <a href="#">NM_173074.1</a> | MGC32646;MGC33136                           | ethanolam    | endoplas GPI          |
| GI_27894292-I | 161.7  | 153.2  | 143.2  | PLAGL1   | <a href="#">NM_006718.2</a> | ZAC;LOT1;ZAC1                               | tumor        | induction             |
| GI_27894297-A | 112.2  | 107.1  | 108.6  | IL1F7    | <a href="#">NM_173203.1</a> | FIL1;FIL1Z;IL1H4;IL-1F7;IL-1H4;IL1RP1;IL-   | interleukin- | extracellul immune    |
| GI_27894301-I | 92.9   | 101.7  | 94.5   | IL1F7    | <a href="#">NM_173205.1</a> | FIL1;FIL1Z;IL1H4;IL-1F7;IL-1H4;IL1RP1;IL-   | interleukin- | extracellul immune    |
| GI_27894303-I | 186.7  | 240.5  | 217.5  | IL1F10   | <a href="#">NM_032556.4</a> | FKSG75;IL-1HY2;IL1-theta;FIL1-theta         | interleukin- | extracellul immune    |
| GI_27894305-S | 929.8  | 7908.3 | 22038  | IL1B     | <a href="#">NM_000576.2</a> | IL-1;IL1F2;IL1-BETA                         | cytokine     | extracellul negative  |
| GI_27894306-A | 132.1  | 142.2  | 133    | IL1F10   | <a href="#">NM_173161.1</a> | FKSG75;IL-1HY2;IL1-theta;FIL1-theta         | interleukin- | extracellul immune    |
| GI_27894308-I | 118    | 120.8  | 102.5  | IL1F5    | <a href="#">NM_012275.2</a> | FIL1;FIL1D;IL1L1;IL1HY1;IL1RP3;MGC29840     | interleukin- | extracellul immune    |
| GI_27894309-A | 197.2  | 212.8  | 219.4  | IL1F5    | <a href="#">NM_173170.1</a> | FIL1;FIL1D;IL1L1;IL1HY1;IL1RP3;MGC29840     | interleukin- | extracellul immune    |
| GI_27894311-I | 91.6   | 103    | 92.3   | IL1F8    | <a href="#">NM_014438.3</a> | FIL1;FIL1H;IL1H2;IL-1F8;IL-1H2;IL1-         | interleukin- | extracellul immune    |
| GI_27894312-A | 99.3   | 95.7   | 105.1  | IL1F8    | <a href="#">NM_173178.1</a> | FIL1;FIL1H;IL1H2;IL-1F8;IL-1H2;IL1-         | interleukin- | extracellul immune    |
| GI_27894312-I | 144.5  | 148.7  | 154.7  | IL1F8    | <a href="#">NM_173178.1</a> | FIL1;FIL1H;IL1H2;IL-1F8;IL-1H2;IL1-         | interleukin- | extracellul immune    |
| GI_27894314-S | 86.1   | 148.3  | 119.6  | IL1F9    | <a href="#">NM_019618.2</a> | IL1E;IL1H1;IL-1F9;IL-1H1;IL1RP2;IL-1RP2;IL- | interleukin- | extracellul response  |
| GI_27894318-A | 106.4  | 122.4  | 125.5  | IL1RN    | <a href="#">NM_173842.1</a> | IRAP;IL1F3;IL1RA;ICIL-1RA;MGC10430          | interleukin- | extracellul inflammat |
| GI_27894318-I | 94.2   | 114.2  | 97.5   | IL1RN    | <a href="#">NM_173842.1</a> | IRAP;IL1F3;IL1RA;ICIL-1RA;MGC10430          | interleukin- | extracellul inflammat |
| GI_27894320-I | 92     | 88.8   | 89.7   | IL1RN    | <a href="#">NM_173843.1</a> | IRAP;IL1F3;IL1RA;ICIL-1RA;MGC10430          | interleukin- | extracellul inflammat |
| GI_27894322-S | 535.8  | 571.9  | 618.3  | IL1RL1LG | <a href="#">NM_006858.2</a> | MGC1270                                     | receptor     | membran cell-cell     |

|               |       |        |       |          |                             |                                      |              |             |             |
|---------------|-------|--------|-------|----------|-----------------------------|--------------------------------------|--------------|-------------|-------------|
| GI_27894323-A | 92.4  | 83     | 70.7  | IL1RL1   | <a href="#">NM_016232.4</a> | T1;ST2;DER4;ST2L;ST2V;FIT-1;MGC32623 | interleukin  | integral to | signal      |
| GI_27894323-I | 155.5 | 172.9  | 150.5 | IL1RL1   | <a href="#">NM_016232.4</a> | T1;ST2;DER4;ST2L;ST2V;FIT-1;MGC32623 | interleukin  | integral to | signal      |
| GI_27894325-I | 90.5  | 83.1   | 80.3  | IL1RL1   | <a href="#">NM_173459.1</a> | T1;ST2;DER4;ST2L;ST2V;FIT-1;MGC32623 | interleukin  | integral to | signal      |
| GI_27894329-S | 172   | 180.9  | 136   | IL1A     | <a href="#">NM_000575.3</a> | IL1;IL-1A;IL1F1;IL1-ALPHA            | cytokine     | extracellul | negative    |
| GI_27894331-S | 150.1 | 399.8  | 168.6 | IL1R1    | <a href="#">NM_000877.2</a> | P80;IL1R;IL1RA;CD121A;D2S1473;IL-1R- | interleukin- | integral to | cell        |
| GI_27894332-I | 533.1 | 519    | 454.2 | IL1R2    | <a href="#">NM_004633.3</a> | IL1RB;MGC47725                       | interleukin- | integral to | immune      |
| GI_27894333-A | 159   | 226.2  | 101.2 | IL1R2    | <a href="#">NM_173343.1</a> | IL1RB;MGC47725                       | interleukin- | integral to | immune      |
| GI_27894333-I | 102.1 | 104.4  | 111.6 | IL1R2    | <a href="#">NM_173343.1</a> | IL1RB;MGC47725                       | interleukin- | integral to | immune      |
| GI_27894335-S | 96.9  | 93.6   | 93.7  | IL1RAPL1 | <a href="#">NM_014271.2</a> | IL1R8;MRX34;OPHN4;IL1RAPL;TIGIRR-2   | receptor     | membran     | learning    |
| GI_27894336-S | 106.2 | 108.3  | 115.1 | KRT20    | <a href="#">NM_019010.1</a> | K20;CK20;KRT21;MGC35423              | structural   | intermedia  | cell shape  |
| GI_27894338-I | 96.1  | 102.2  | 85    | KRT23    | <a href="#">NM_015515.3</a> | K23;CK23;HAIK1;MGC26158;DKFZP434G03  |              |             |             |
| GI_27894340-A | 95.2  | 108.1  | 97.9  | KRT23    | <a href="#">NM_173213.1</a> | K23;CK23;HAIK1;MGC26158;DKFZP434G03  |              |             |             |
| GI_27894340-I | 111.6 | 122.3  | 123.3 | KRT23    | <a href="#">NM_173213.1</a> | K23;CK23;HAIK1;MGC26158;DKFZP434G03  |              |             |             |
| GI_27894342-I | 243.8 | 310.8  | 272.6 | NR4A1    | <a href="#">NM_002135.3</a> | HMR;N10;TR3;NP10;GFRP1;NAK-          | ligand-      |             | signal      |
| GI_27894345-A | 132.4 | 147.5  | 149.9 | NR4A1    | <a href="#">NM_173158.1</a> | HMR;N10;TR3;NP10;GFRP1;NAK-          | ligand-      |             | signal      |
| GI_27894345-I | 161.2 | 196.3  | 183.9 | NR4A1    | <a href="#">NM_173158.1</a> | HMR;N10;TR3;NP10;GFRP1;NAK-          | ligand-      |             | signal      |
| GI_27894352-A | 373.8 | 416.1  | 357.1 | NR4A2    | <a href="#">NM_173173.1</a> | NOT;RNR1;HZF-3;NURR1;TINUR           | ligand-      | nucleus     | signal      |
| GI_27894356-I | 116.6 | 113    | 101.3 | NR4A3    | <a href="#">NM_173198.1</a> | CHN;TEC;CSMF;NOR1;MINOR              | thyroid      | nucleus     | cell growth |
| GI_27894358-A | 83.3  | 83.6   | 96.6  | NR4A3    | <a href="#">NM_173199.1</a> | CHN;TEC;CSMF;NOR1;MINOR              | thyroid      | nucleus     | cell growth |
| GI_27894358-I | 562.4 | 697.2  | 643.3 | NR4A3    | <a href="#">NM_173199.1</a> | CHN;TEC;CSMF;NOR1;MINOR              | thyroid      | nucleus     | cell growth |
| GI_27894363-S | 97.6  | 110.6  | 96.8  | GKN1     | <a href="#">NM_019617.2</a> | CA11;AMP18;BRICD1                    | molecular    | cellular_co | digestion   |
| GI_27894365-S | 357   | 364.6  | 282.7 | APBB2    | <a href="#">NM_173075.1</a> | FE65L;FE65L1;MGC35575                | protein C-   | membran     | protein     |
| GI_27894367-S | 511.7 | 375.5  | 332.3 | NOTCH1   | <a href="#">NM_017617.2</a> | hN1;TAN1                             | tumor        | integral to | signal      |
| GI_27894369-S | 218.3 | 243.8  | 210.4 | NOTCH4   | <a href="#">NM_004557.2</a> | INT3;NOTCH3                          | structural   | integral to | regulation  |
| GI_27894372-A | 303.7 | 316    | 338.4 | C1D      | <a href="#">NM_173177.1</a> | SUNCOR;MGC12261;MGC14659             | DNA          | nucleus     |             |
| GI_27894374-S | 110.7 | 120.4  | 110.5 | CEL      | <a href="#">NM_001807.2</a> | BAL;FAP;BSDL;BSSL;CELL;FAPP;LIPA;CEa | serine       |             | cholester   |
| GI_27894375-S | 92.9  | 93.3   | 98.6  | CHL1     | <a href="#">NM_006614.2</a> | CALL;L1CAM2                          | cell         | integral to | cell        |
| GI_27894377-S | 104.2 | 113    | 106.6 | CLIC6    | <a href="#">NM_053277.1</a> | CLIC1L                               | voltage-     | membran     | chloride    |
| GI_27894379-S | 249.9 | 159.9  | 163.5 | CSEN     | <a href="#">NM_013434.3</a> | DREAM;KCHIP3;KCNP3;MGC18289          | transcripti  |             | signal      |
| GI_27894380-S | 268.8 | 324.2  | 316.4 | EFNA2    | <a href="#">NM_001405.2</a> | ELF-1;EPLG6;LERK6;HEK7-L             | ephrin       | membran     | cell-cell   |
| GI_27894383-S | 417.1 | 199.7  | 485.1 | FLRT2    | <a href="#">NM_013231.2</a> | KIAA0405                             | receptor     | integral to | biological_ |
| GI_27894384-S | 299.4 | 340.7  | 325.7 | FZD5     | <a href="#">NM_003468.2</a> | HFZ5                                 | receptor     | integral to | establish   |
| GI_27894386-S | 239.6 | 245.4  | 224.2 | HELLS    | <a href="#">NM_018063.3</a> | LSH;PASG;SMARCA6;FLJ10339            |              |             |             |
| GI_27894387-S | 6612  | 8650.7 | 6844  | QP-C     | <a href="#">NM_014402.2</a> |                                      | ubiquinol-   | ubiquinol-  | electron    |
| GI_27901802-S | 700.1 | 896.2  | 777   | PSKH1    | <a href="#">NM_006742.1</a> |                                      | protein      | Golgi       | protein     |
| GI_27923946-S | 103.8 | 112.1  | 101.2 | VN1R3    | <a href="#">NM_174980.1</a> | V1RL3;FKSG46                         | pheromon     | integral to | G-protein   |
| GI_28076868-S | 160.5 | 119.2  | 93.5  | SERPINB4 | <a href="#">NM_002974.1</a> | PI11;SCCA2;LEUPIN                    |              |             |             |
| GI_28077090-S | 178.8 | 178.4  | 171.4 | TCF8     | <a href="#">NM_030751.2</a> | BZP;ZEB;ZEB1;AREB6;ZFHEP;NIL-        | transcripti  | nucleus     | regulation  |
| GI_28144892-A | 380.7 | 448.8  | 435.1 | CRB3     | <a href="#">NM_174881.1</a> | MGC17303                             |              |             |             |
| GI_28144894-I | 156.2 | 188.6  | 138   | CRB3     | <a href="#">NM_174882.1</a> | MGC17303                             |              |             |             |
| GI_28144896-A | 217.8 | 280.9  | 108.9 | AK5      | <a href="#">NM_174858.1</a> | AK6;MGC33326                         | adenylate    | cytosol     | ADP         |
| GI_28144896-I | 117.8 | 123.7  | 93.4  | AK5      | <a href="#">NM_174858.1</a> | AK6;MGC33326                         | adenylate    | cytosol     | ADP         |
| GI_28144898-I | 128   | 129.8  | 113   | AK5      | <a href="#">NM_012093.2</a> | AK6;MGC33326                         | adenylate    | cytosol     | ADP         |
| GI_28144900-S | 292.1 | 349    | 321.2 | IL28B    | <a href="#">NM_172139.2</a> | IFNL3;IL-28B                         |              |             |             |

|               |        |        |        |            |                             |                                     |              |              |             |
|---------------|--------|--------|--------|------------|-----------------------------|-------------------------------------|--------------|--------------|-------------|
| GI_28144902-S | 139.9  | 152.2  | 135.1  | IL23A      | <a href="#">NM_016584.2</a> | P19;SGRF;IL-23;IL-23A;IL23P19       |              |              |             |
| GI_28144903-S | 138.4  | 144.2  | 146.9  | MBD3L2     | <a href="#">NM_144614.2</a> |                                     |              |              |             |
| GI_28144904-S | 368.1  | 445.7  | 410.1  | USH2A      | <a href="#">NM_007123.3</a> | US2;USH2                            | structural   | basal        | hearing     |
| GI_28144906-I | 105.7  | 114.1  | 96.4   | USH3A      | <a href="#">NM_052995.2</a> | USH3                                |              |              |             |
| GI_28144911-A | 123.9  | 127.6  | 131.8  | USH3A      | <a href="#">NM_174880.1</a> | USH3                                |              |              |             |
| GI_28144911-I | 108.5  | 113.6  | 112.7  | USH3A      | <a href="#">NM_174880.1</a> | USH3                                |              |              |             |
| GI_28144915-S | 437.7  | 443    | 390.5  | F25965     | <a href="#">NM_019104.1</a> | MGC9505                             |              |              |             |
| GI_28144919-S | 701.6  | 863.5  | 835    | PEN2       | <a href="#">NM_172341.1</a> | MDS033                              |              | Golgi        |             |
| GI_28173557-S | 96.3   | 112.6  | 96.7   | TA4        | <a href="#">NM_175067.1</a> |                                     | receptor     | integral to  | G-protein   |
| GI_28173561-S | 92.3   | 107.5  | 104.4  | TAR3       | <a href="#">NM_175057.1</a> | TA3                                 | receptor     | integral to  | G-protein   |
| GI_28178815-A | 2936.9 | 2913.5 | 1666.3 | IDH3B      | <a href="#">NM_174855.1</a> | H-IDHB;MGC903;FLJ11043              | isocitrate   | mitochond    | isocitrate  |
| GI_28178818-I | 87.7   | 101.2  | 96.6   | IDH3B      | <a href="#">NM_174856.1</a> | H-IDHB;MGC903;FLJ11043              | isocitrate   | mitochond    | isocitrate  |
| GI_28178824-S | 1281.1 | 1316.9 | 1543.8 | IDH1       | <a href="#">NM_005896.2</a> | IDH;IDP;PICD                        | isocitrate   | cytosol      | isocitrate  |
| GI_28178831-S | 953.9  | 1469.9 | 1098   | IDH2       | <a href="#">NM_002168.2</a> | IDH;IDP;IDHM;ICD-M;mNADP-IDH        |              | mitochond    | carbohydr   |
| GI_28178835-S | 521.5  | 604.4  | 601.8  | IDH3A      | <a href="#">NM_005530.2</a> |                                     | isocitrate   | mitochond    | carbohydr   |
| GI_28178836-A | 870.9  | 993.9  | 1080.3 | IDH3G      | <a href="#">NM_004135.2</a> | H-IDHG                              | isocitrate   |              | carbohydr   |
| GI_28178837-A | 1247.3 | 1269   | 1506.3 | IDH3G      | <a href="#">NM_174869.1</a> | H-IDHG                              | isocitrate   |              | carbohydr   |
| GI_28178837-I | 133.6  | 165.8  | 145.8  | IDH3G      | <a href="#">NM_174869.1</a> | H-IDHG                              | isocitrate   |              | carbohydr   |
| GI_28178841-I | 177.1  | 156.5  | 140.1  | TGIF       | <a href="#">NM_003244.2</a> | HPE4;MGC5066;MGC39747               | transcripti  | nucleus      | developm    |
| GI_28178842-I | 278.7  | 343.1  | 306    | TGIF       | <a href="#">NM_170695.2</a> | HPE4;MGC5066;MGC39747               | transcripti  | nucleus      | developm    |
| GI_28178844-I | 101.2  | 120.6  | 91.7   | TGIF       | <a href="#">NM_173207.1</a> | HPE4;MGC5066;MGC39747               | transcripti  | nucleus      | developm    |
| GI_28178850-I | 312.1  | 402.5  | 344.1  | TGIF       | <a href="#">NM_173209.1</a> | HPE4;MGC5066;MGC39747               | transcripti  | nucleus      | developm    |
| GI_28178854-A | 1715.8 | 1260.9 | 1174.9 | TGIF       | <a href="#">NM_173211.1</a> | HPE4;MGC5066;MGC39747               | transcripti  | nucleus      | developm    |
| GI_28178856-I | 110.9  | 132.8  | 142.4  | TGIF       | <a href="#">NM_174886.1</a> | HPE4;MGC5066;MGC39747               | transcripti  | nucleus      | developm    |
| GI_28178860-S | 133.8  | 163.4  | 140.8  | IL2        | <a href="#">NM_000586.2</a> | IL-2;TCGF                           | interleukin- | extracellul  | cell        |
| GI_28178862-S | 116.3  | 123.4  | 110.2  | OSM        | <a href="#">NM_020530.3</a> | MGC20461                            | cytokine     | extracellul  | negative    |
| GI_28195383-S | 151.8  | 176.7  | 176.6  | NPTX2      | <a href="#">NM_002523.1</a> | NP2;NP-II                           | lectin [goid | cellular_co  | transport   |
| GI_28195387-S | 159.1  | 227.8  | 150.9  | RAB11-FIP4 | <a href="#">NM_032932.2</a> | KIAA1821;MGC11316                   |              |              |             |
| GI_28212219-S | 108.5  | 116    | 107.1  | XG         | <a href="#">NM_175569.1</a> | PBDX                                | molecular    | integral to  | biological_ |
| GI_28212271-S | 119.6  | 120    | 124.6  | C14orf21   | <a href="#">NM_174913.1</a> | KIAA2021                            | RNA          | nucleus      | regulation  |
| GI_28212273-S | 273    | 333.1  | 276.5  | FLJ35936   | <a href="#">NM_173464.1</a> |                                     | transcripti  | nucleus      | regulation  |
| GI_28212275-S | 101.8  | 114.2  | 104    | FLJ35785   | <a href="#">NM_173613.1</a> |                                     |              |              |             |
| GI_28212277-S | 91.5   | 105.4  | 91.2   | FLJ36870   | <a href="#">NM_173658.1</a> |                                     |              | nucleus      |             |
| GI_28269671-S | 174.6  | 153.9  | 130.7  | SDCCAG8    | <a href="#">NM_006642.1</a> | CCCAP;NY-CO-8                       | tumor        |              |             |
| GI_28269680-S | 3905.5 | 4146.2 | 3831.2 | NDUFA11    | <a href="#">NM_175614.1</a> | B14.7                               | NADH         |              |             |
| GI_28269686-S | 121.2  | 136.3  | 116.2  | ZAR1       | <a href="#">NM_175619.1</a> |                                     |              |              |             |
| GI_28269692-S | 91.4   | 135.1  | 154.7  | XYLT1      | <a href="#">NM_022166.1</a> | XT1;XT-I                            | acetylgluc   | membran      | glycosami   |
| GI_28269706-S | 124.3  | 108.8  | 108.6  | C14orf27   | <a href="#">NM_175060.1</a> |                                     | sugar        |              | heterophili |
| GI_28274681-S | 909.4  | 1191.5 | 1062.9 | ZNF33A     | <a href="#">NM_006974.1</a> | KOX31;ZNF33;ZZAPK;FLJ23404;KIAA0065 |              |              |             |
| GI_28274683-I | 98.7   | 112.9  | 111.9  | TRPM3      | <a href="#">NM_020952.1</a> | MLSN2;LTRPC3;FLJ11726;KIAA1616      |              |              |             |
| GI_28274685-S | 201.4  | 151.2  | 139.8  | ZNF545     | <a href="#">NM_133466.1</a> | KIAA1948;MGC45380                   | nucleic      | intracellula | regulation  |
| GI_28274693-S | 458.5  | 315.4  | 162.8  | RASL10B    | <a href="#">NM_033315.2</a> | MGC47540;VTS58635                   | small        |              | small       |
| GI_28274698-S | 737.5  | 554.8  | 639.9  | RAB3IP     | <a href="#">NM_022456.2</a> | RABIN3;FLJ22548                     |              |              |             |
| GI_28274700-S | 1328.1 | 1228.2 | 1280.3 | ZNF511     | <a href="#">NM_145806.2</a> | MGC30006                            |              |              |             |

|               |        |        |                 |                             |                                   |             |             |            |
|---------------|--------|--------|-----------------|-----------------------------|-----------------------------------|-------------|-------------|------------|
| GI_28302128-S | 115.1  | 136.9  | 109 HBB         | <a href="#">NM_000518.4</a> |                                   | hemoglobi   |             |            |
| GI_28302129-S | 3418.6 | 3788   | 1036.1 HBE1     | <a href="#">NM_005330.3</a> |                                   | oxygen      | hemoglobi   | oxygen     |
| GI_28302130-S | 214.1  | 295.9  | 169.5 HBG1      | <a href="#">NM_000559.2</a> | HBGA;HBGR                         | oxygen      | hemoglobi   | oxygen     |
| GI_28302132-S | 237.9  | 310.8  | 171.4 HBG2      | <a href="#">NM_000184.2</a> |                                   |             | hemoglobi   |            |
| GI_28315872-S | 93.2   | 96.9   | 100 LOC126295   | <a href="#">NM_173480.1</a> |                                   | nucleic     | nucleus     | regulation |
| GI_28316807-S | 132.2  | 150.8  | 146.4 FLJ39821  | <a href="#">NM_173700.1</a> |                                   |             |             |            |
| GI_28316809-S | 223    | 226.5  | 221.1 MGC31967  | <a href="#">NM_174923.1</a> |                                   |             |             |            |
| GI_28329413-I | 86.1   | 83.9   | 76.8 CBFA2T1    | <a href="#">NM_004349.2</a> | CDR;ETO;MTG8;AML1T1;ZMYND2;MGC279 | transcripti | nucleus     | energy     |
| GI_28329415-A | 90.4   | 96.2   | 87 CBFA2T1      | <a href="#">NM_175634.1</a> | CDR;ETO;MTG8;AML1T1;ZMYND2;MGC279 | transcripti | nucleus     | energy     |
| GI_28329415-I | 109    | 113.7  | 112.7 CBFA2T1   | <a href="#">NM_175634.1</a> | CDR;ETO;MTG8;AML1T1;ZMYND2;MGC279 | transcripti | nucleus     | energy     |
| GI_28329418-I | 239.6  | 288.7  | 256 CBFA2T1     | <a href="#">NM_175635.1</a> | CDR;ETO;MTG8;AML1T1;ZMYND2;MGC279 | transcripti | nucleus     | energy     |
| GI_28329421-I | 95.1   | 102.1  | 93.3 CBFA2T1    | <a href="#">NM_175636.1</a> | CDR;ETO;MTG8;AML1T1;ZMYND2;MGC279 | transcripti | nucleus     | energy     |
| GI_28329424-I | 138.8  | 154.7  | 121.7 APTX      | <a href="#">NM_017692.2</a> | AOA;AOA1;AXA1;EAOH;EOAHA;FHA-     |             |             |            |
| GI_28329426-A | 661    | 802.8  | 782.2 APTX      | <a href="#">NM_175071.1</a> | AOA;AOA1;AXA1;EAOH;EOAHA;FHA-     |             |             |            |
| GI_28329438-A | 436.3  | 428.4  | 379.4 TG737     | <a href="#">NM_006531.2</a> | MGC26259;D13S1056E                |             |             | excretion  |
| GI_28329444-S | 117.7  | 131.5  | 104.1 KCNV1     | <a href="#">NM_014379.2</a> | HNKA;KCNB3;KV2.3;KV8.1            | ion         | voltage-    | potassium  |
| GI_28329446-S | 113.8  | 105.3  | 103.9 KCNV2     | <a href="#">NM_133497.2</a> | Kv8.2;KV11.1                      | voltage-    | voltage-    | cation     |
| GI_28372492-S | 1311.2 | 1558.5 | 899.7 CUL4B     | <a href="#">NM_003588.2</a> | KIAA0695                          | molecular   | cellular_co | cell cycle |
| GI_28372496-S | 142.7  | 169.1  | 144.1 UBR1      | <a href="#">NM_174916.1</a> |                                   | structural  | ribosome    | protein    |
| GI_28372498-S | 109.8  | 105.1  | 97.1 HUMMLC2B   | <a href="#">NM_013292.2</a> | MRLC2;MGC13450                    | structural  | muscle      |            |
| GI_28372502-S | 138.8  | 151.7  | 147.2 K6IRS2    | <a href="#">NM_080747.1</a> | KRT6;K6irs;KRT6IRS2               |             | kinesin     |            |
| GI_28372504-S | 233.6  | 230.2  | 259.6 CBX7      | <a href="#">NM_175709.1</a> |                                   | chromatin   | chromatin   | chromatin  |
| GI_28372506-S | 155.4  | 183.7  | 178.1 BASE      | <a href="#">NM_173859.1</a> |                                   |             |             |            |
| GI_28372510-S | 94.1   | 94.2   | 94.4 ZDHHC22    | <a href="#">NM_174976.1</a> | C14orf59                          |             |             |            |
| GI_28372512-S | 86.7   | 94.8   | 90.5 C14orf39   | <a href="#">NM_174978.1</a> |                                   |             |             |            |
| GI_28372516-S | 127.9  | 153.7  | 133.8 C8orf15   | <a href="#">NM_175076.1</a> |                                   |             |             |            |
| GI_28372518-S | 100.1  | 100    | 100.5 C21orf32  | <a href="#">NM_175570.1</a> |                                   |             |             |            |
| GI_28372520-S | 121.4  | 124.9  | 125.2 HUCEP11   | <a href="#">NM_014858.1</a> | KIAA0481                          |             | integral to |            |
| GI_28372524-S | 133.1  | 140.6  | 144.7 BPIL3     | <a href="#">NM_174897.1</a> |                                   | lipid       |             |            |
| GI_28372526-S | 132.2  | 123    | 115.6 LOC129530 | <a href="#">NM_174898.1</a> |                                   | lysozyme    |             | cell wall  |
| GI_28372530-S | 138.5  | 152.9  | 134.5 PPP4R2    | <a href="#">NM_174907.1</a> |                                   |             | centrosom   | protein    |
| GI_28372532-S | 1072.1 | 1807.1 | 1409.9 MGC23909 | <a href="#">NM_174909.1</a> |                                   |             |             |            |
| GI_28372534-S | 83.1   | 83.2   | 86.2 TCTE3      | <a href="#">NM_174910.1</a> |                                   |             |             |            |
| GI_28372536-S | 147.2  | 133.6  | 134.6 LOC197322 | <a href="#">NM_174917.1</a> |                                   | catalytic   |             | metabolis  |
| GI_28372538-S | 420.1  | 611.7  | 705.7 LOC201895 | <a href="#">NM_174921.1</a> |                                   |             |             |            |
| GI_28372542-S | 87.4   | 93.4   | 93.5 LOC204474  | <a href="#">NM_174924.1</a> |                                   | electron    | membran     | transport  |
| GI_28372544-S | 532.6  | 486.4  | 435.4 LOC205251 | <a href="#">NM_174925.1</a> |                                   |             |             |            |
| GI_28372546-S | 407.4  | 478.2  | 361.9 LOC221143 | <a href="#">NM_174928.1</a> |                                   | N-          |             | DNA        |
| GI_28372550-S | 104.1  | 104.4  | 105.1 BPIL2     | <a href="#">NM_174932.1</a> | dJ149A16.7                        | lipid       |             |            |
| GI_28372554-S | 112.7  | 119.9  | 106.2 SCN4B     | <a href="#">NM_174934.1</a> |                                   |             |             |            |
| GI_28372558-S | 120.4  | 133.7  | 108.1 TCERG1L   | <a href="#">NM_174937.1</a> | FLJ38950                          |             |             |            |
| GI_28372560-S | 414.2  | 482.2  | 557.5 LOC283232 | <a href="#">NM_174940.1</a> |                                   |             |             |            |
| GI_28372562-S | 242.6  | 274.6  | 235 LOC283431   | <a href="#">NM_174942.1</a> |                                   |             |             | cell cycle |
| GI_28372566-S | 241.4  | 238.3  | 218.9 ZNF575    | <a href="#">NM_174945.1</a> |                                   |             |             |            |

|               |        |        |        |            |                             |                                    |              |             |            |
|---------------|--------|--------|--------|------------|-----------------------------|------------------------------------|--------------|-------------|------------|
| GI_28372568-S | 94.1   | 97     | 89     | LOC131368  | <a href="#">NM_175056.1</a> |                                    |              |             |            |
| GI_28373062-A | 83.1   | 88.1   | 98.4   | KCNIP4     | <a href="#">NM_147183.2</a> | CALP;KCHIP4;MGC44947               |              |             |            |
| GI_28373062-I | 89.9   | 84.5   | 83.7   | KCNIP4     | <a href="#">NM_147183.2</a> | CALP;KCHIP4;MGC44947               |              |             |            |
| GI_28373063-I | 152.5  | 176.4  | 159.9  | KCNIP4     | <a href="#">NM_025221.4</a> | CALP;KCHIP4;MGC44947               |              |             |            |
| GI_28373064-S | 93.8   | 104.1  | 96.9   | KCNQ5      | <a href="#">NM_019842.2</a> | Kv7.5                              | inward       | voltage-    | synaptic   |
| GI_28373079-S | 133.9  | 289.1  | 294.5  | SIAT9      | <a href="#">NM_003896.2</a> | ST3GalV;SIATGM3S                   | neolactote   | integral to | glycosphin |
| GI_28373083-A | 456.6  | 430.5  | 494.1  | SIAT6      | <a href="#">NM_174970.1</a> | ST3N;ST3GALII;ST3GalIII;ST3Gal III | N-           | Golgi       | protein    |
| GI_28373091-A | 764.4  | 1023.2 | 1152.9 | SIAT7D     | <a href="#">NM_175039.1</a> | SIAT3C;ST6GALNAC4;ST6GALNACIV      | sialyltransf | soluble     | glycolipid |
| GI_28373095-S | 160.9  | 191.5  | 168.3  | SIAT8A     | <a href="#">NM_003034.2</a> | GD3S;SIAT8;ST8Sial;ST8Sia I        | sialyltransf | Golgi       | glycosphin |
| GI_28373096-S | 131.2  | 148.2  | 137.7  | SIAT8B     | <a href="#">NM_006011.2</a> | STX;HsT19690;ST8SIA-II             | sialyltransf | Golgi       | N-glycan   |
| GI_28373098-A | 91.6   | 107.1  | 107.9  | SIAT8D     | <a href="#">NM_175052.1</a> | PST;PST1;MGC34450;MGC61459;ST8SIA- | sialyltransf | Golgi       | oligosacch |
| GI_28373098-I | 106    | 102.8  | 98.3   | SIAT8D     | <a href="#">NM_175052.1</a> | PST;PST1;MGC34450;MGC61459;ST8SIA- | sialyltransf | Golgi       | oligosacch |
| GI_28373100-S | 110    | 114.4  | 108.3  | SIAT8E     | <a href="#">NM_013305.2</a> | ST8SiaV;ST8Sia V                   | sialyltransf | Golgi       | glycosphin |
| GI_28373114-A | 332.8  | 438.1  | 371.9  | ATP2A3     | <a href="#">NM_174958.1</a> | SERCA3                             | adenosine    | endoplas    | small      |
| GI_28373118-A | 119.3  | 122.9  | 116.1  | CNTN1      | <a href="#">NM_175038.1</a> | F3;GP135                           | cell         | peripheral  | cell       |
| GI_28373120-S | 200.3  | 231.8  | 198.9  | CNTN2      | <a href="#">NM_005076.2</a> | AXT;TAX;TAX1;TAG-1                 | cell         | integral to | cell       |
| GI_28373121-I | 133.2  | 129.1  | 131.7  | CNTN4      | <a href="#">NM_175607.1</a> | AXCAM;BIG-2;CNTN4A;MGC33615        |              |             |            |
| GI_28373123-I | 132.4  | 147    | 125.6  | CNTN4      | <a href="#">NM_175612.1</a> | AXCAM;BIG-2;CNTN4A;MGC33615        |              |             |            |
| GI_28373125-A | 129    | 131.2  | 127.8  | CNTN4      | <a href="#">NM_175613.1</a> | AXCAM;BIG-2;CNTN4A;MGC33615        |              |             |            |
| GI_28373127-I | 100.1  | 125.4  | 116.8  | CNTN5      | <a href="#">NM_014361.2</a> | NB-2;HNB-2s                        |              |             |            |
| GI_28373128-A | 90.7   | 79.9   | 83.5   | CNTN5      | <a href="#">NM_175566.1</a> | NB-2;HNB-2s                        |              |             |            |
| GI_28373130-S | 91.1   | 103.9  | 90.1   | CNTN6      | <a href="#">NM_014461.2</a> | NB3                                | ATP          | membran     | central    |
| GI_28373193-A | 2294.1 | 2292.7 | 2898.6 | ADRM1      | <a href="#">NM_175573.1</a> | GP110;MGC29536                     | tumor        | membran     | cell       |
| GI_28376641-S | 90.5   | 94.4   | 91.2   | HGNT-IV-H  | <a href="#">NM_013244.2</a> | GNTIVH                             | alpha-1,3-   | membran     | carbohydr  |
| GI_28376642-S | 85.7   | 82.2   | 78.7   | KLF8       | <a href="#">NM_007250.2</a> | BKLF3;DXS741;ZNF741                | DNA          | nucleus     | regulation |
| GI_28376643-S | 598.9  | 599.3  | 482.3  | GTF2H3     | <a href="#">NM_001516.3</a> | BTF2;TFIIH                         | translation  | transcripti | DNA        |
| GI_28376644-S | 438.7  | 710.5  | 661    | MGC10500   | <a href="#">NM_031477.2</a> |                                    |              |             |            |
| GI_28376645-S | 1557.2 | 2098.2 | 2334.6 | HMG1L10    | <a href="#">NM_172363.1</a> | bK445C9.3                          | DNA          | chromatin   | chromoso   |
| GI_28376647-S | 300.8  | 345.8  | 302.4  | FLJ33590   | <a href="#">NM_173821.1</a> |                                    |              |             |            |
| GI_28376649-S | 189.9  | 222.1  | 189.3  | DKFZp313N0 | <a href="#">NM_173826.1</a> |                                    |              |             |            |
| GI_28376651-S | 95.3   | 108.2  | 107.2  | FLJ25851   | <a href="#">NM_174927.1</a> |                                    |              |             |            |
| GI_28376657-S | 143.7  | 172    | 166.3  | MGC39518   | <a href="#">NM_173822.1</a> |                                    |              |             |            |
| GI_28376659-S | 252.4  | 294    | 291.9  | RABL3      | <a href="#">NM_173825.1</a> | MGC23920                           | small        |             | small      |
| GI_28376663-S | 111.9  | 112    | 115.4  | ANUBL1     | <a href="#">NM_174890.1</a> | FLJ40185                           | molecular    |             |            |
| GI_28376665-S | 102.2  | 93.8   | 99     | MGC39724   | <a href="#">NM_174906.1</a> |                                    |              |             |            |
| GI_28376667-S | 435.4  | 384.4  | 297    | MGC17839   | <a href="#">NM_174926.1</a> |                                    |              |             |            |
| GI_28395019-S | 263.5  | 336.8  | 295.5  | NCR2       | <a href="#">NM_004828.2</a> | LY95;NKP44;NK-p44                  | transmem     | integral to | killer     |
| GI_28395034-A | 1056.4 | 1112.5 | 979.3  | CPR8       | <a href="#">NM_004748.2</a> | KIAA1254                           |              |             |            |
| GI_28395034-I | 80.8   | 95.3   | 87.4   | CPR8       | <a href="#">NM_004748.2</a> | KIAA1254                           |              |             |            |
| GI_28395040-S | 104.5  | 112.8  | 105.8  | NY-REN-7   | <a href="#">NM_173663.1</a> | KIAA0752                           |              |             |            |
| GI_28395048-S | 316.6  | 334.3  | 299    | FLJ38991   | <a href="#">NM_173827.1</a> |                                    |              | mitochond   | signal     |
| GI_28395050-S | 127.5  | 154.7  | 139.4  | FLJ38348   | <a href="#">NM_174931.1</a> |                                    |              |             |            |
| GI_28395052-S | 93.4   | 108.9  | 86.3   | FLJ35487   | <a href="#">NM_173820.1</a> |                                    |              |             |            |
| GI_28411949-A | 359.8  | 289.1  | 322.1  | C14orf130  | <a href="#">NM_175748.1</a> | MGC9518;FLJ10483                   | ubiquitin-   |             | ubiquitin  |

|               |        |        |        |           |                             |                                       |              |             |              |
|---------------|--------|--------|--------|-----------|-----------------------------|---------------------------------------|--------------|-------------|--------------|
| GI_28411949-I | 276.9  | 374.3  | 287.2  | C14orf130 | <a href="#">NM_175748.1</a> | MGC9518;FLJ10483                      | ubiquitin-   |             | ubiquitin    |
| GI_28416399-I | 149.4  | 169.5  | 164.2  | TJP1      | <a href="#">NM_003257.2</a> | ZO-1                                  | protein      | septate     | intercellula |
| GI_28416401-A | 1396.4 | 1173.7 | 1132.3 | TJP1      | <a href="#">NM_175610.1</a> | ZO-1                                  | protein      | septate     | intercellula |
| GI_28416423-A | 135.9  | 160.7  | 148.8  | SLA2      | <a href="#">NM_175077.1</a> | SLAP2;SLAP-                           |              | membran     | intracellula |
| GI_28416425-A | 228.8  | 249.8  | 275.6  | VIK       | <a href="#">NM_024061.2</a> | MGC5521;FLJ23461;MGC10859;MGC16203    |              |             |              |
| GI_28416425-I | 497.6  | 536.3  | 751.5  | VIK       | <a href="#">NM_024061.2</a> | MGC5521;FLJ23461;MGC10859;MGC16203    |              |             |              |
| GI_28416426-I | 1757.3 | 1251.2 | 1085.4 | VIK       | <a href="#">NM_138494.1</a> | MGC5521;FLJ23461;MGC10859;MGC16203    |              |             |              |
| GI_28416428-S | 83.9   | 98.3   | 91.5   | hIAN2     | <a href="#">NM_024711.2</a> | FLJ22690                              |              |             |              |
| GI_28416430-S | 265.3  | 276.3  | 157.8  | HIMAP2    | <a href="#">NM_015660.1</a> | IMAP2;MGC24275;DKFZP586D0824          | GTP          | integral to |              |
| GI_28416432-S | 164    | 215.6  | 188.8  | HIMAP4    | <a href="#">NM_018326.2</a> | IAN1;IMAP4;hIAN1;MSTP062;FLJ11110     | GTP          |             |              |
| GI_28416433-S | 121    | 122.7  | 99.4   | HIST4H4   | <a href="#">NM_175054.2</a> | MGC24116                              |              |             |              |
| GI_28416434-A | 619.9  | 878.1  | 742.5  | ARFGAP1   | <a href="#">NM_018209.2</a> | ARF1GAP;MGC39924;HRIHFB2281           | protein      | Golgi       | intracellula |
| GI_28416437-S | 1217.1 | 1550.7 | 1089.9 | ARFGAP3   | <a href="#">NM_014570.3</a> | ARFGAP1                               | protein      | nucleus     | intracellula |
| GI_28416443-I | 82.1   | 87.4   | 82.7   | GRIK1     | <a href="#">NM_175611.1</a> | EAA3;EEA3;GLR5;GLUR5                  | kainate      | integral to | central      |
| GI_28416445-A | 96.4   | 98.9   | 105.4  | GRIK1     | <a href="#">NM_000830.2</a> | EAA3;EEA3;GLR5;GLUR5                  | kainate      | integral to | central      |
| GI_28416445-I | 86.9   | 92.5   | 90.1   | GRIK1     | <a href="#">NM_000830.2</a> | EAA3;EEA3;GLR5;GLUR5                  | kainate      | integral to | central      |
| GI_28416898-A | 1137.3 | 836.5  | 484    | GART      | <a href="#">NM_175085.1</a> | AIRS;GARS;PAIS;PGFT;PRGS;GARTF;MGC    | phosphori    |             |              |
| GI_28416898-I | 818.5  | 648.3  | 404.6  | GART      | <a href="#">NM_175085.1</a> | AIRS;GARS;PAIS;PGFT;PRGS;GARTF;MGC    | phosphori    |             |              |
| GI_28416900-I | 2178.7 | 1988.4 | 1760.8 | GART      | <a href="#">NM_000819.3</a> | AIRS;GARS;PAIS;PGFT;PRGS;GARTF;MGC    | phosphori    |             |              |
| GI_28416901-S | 96.5   | 93.8   | 87.6   | IL1RL2    | <a href="#">NM_003854.2</a> | IL1RRP2;IL1R-rp2                      | interleukin- | integral to | cellular     |
| GI_28416910-A | 118.1  | 126.3  | 106.5  | IL28RA    | <a href="#">NM_173065.1</a> | IFNLR;LICR2;IFNLR1;CRF2/12            |              |             |              |
| GI_28416912-S | 183.9  | 212.2  | 186.8  | IL27      | <a href="#">NM_145659.2</a> | P28;IL30;IL-27;IL27p28                | protein      | extracellul | regulation   |
| GI_28416914-S | 163.9  | 178.3  | 172.1  | IL3       | <a href="#">NM_000588.3</a> | IL-3;MCGF;MULTI-CSF                   | cytokine     | extracellul | positive     |
| GI_28416918-I | 118    | 131.2  | 117.4  | P2RX2     | <a href="#">NM_170683.2</a> | P2X2                                  | ligand-      | integral to | ion          |
| GI_28416920-A | 158.6  | 190.3  | 164.7  | P2RX2     | <a href="#">NM_174872.1</a> | P2X2                                  | ligand-      | integral to | ion          |
| GI_28416924-S | 124.5  | 114.8  | 113.6  | P2RX3     | <a href="#">NM_002559.2</a> | P2X3                                  | ATP-         | integral to | small        |
| GI_28416928-A | 234.9  | 223.7  | 108.3  | P2RX4     | <a href="#">NM_175567.1</a> | P2X4;P2X4R                            | ATP-         | integral to | small        |
| GI_28416936-A | 102    | 120    | 156.9  | P2RX5     | <a href="#">NM_175081.1</a> | P2X5;P2X5R;MGC47755                   | ion          | integral to | small        |
| GI_28416936-I | 134    | 142.5  | 138.2  | P2RX5     | <a href="#">NM_175081.1</a> | P2X5;P2X5R;MGC47755                   | ion          | integral to | small        |
| GI_28416938-S | 3587.6 | 3235.5 | 2276.9 | PLS3      | <a href="#">NM_005032.3</a> | T-PLASTIN                             | actin        | actin       |              |
| GI_28416939-S | 1629.8 | 1563.2 | 1803.2 | SBDS      | <a href="#">NM_016038.2</a> | SDS;CGI-97;FLJ10917                   | molecular    |             |              |
| GI_28416941-S | 528.5  | 636.4  | 583.8  | SNRPD1    | <a href="#">NM_006938.2</a> | SMD1;SNRPD;HsT2456                    | small        | small       | mRNA         |
| GI_28416942-S | 487.7  | 365.6  | 280    | SSR3      | <a href="#">NM_007107.2</a> | TRAPG                                 | signal       | microsom    |              |
| GI_28416943-S | 4436.9 | 4224   | 4259.7 | SSRP1     | <a href="#">NM_003146.2</a> | FACT;T160                             | DNA          | chromatin   | regulation   |
| GI_28416944-S | 94.9   | 93.3   | 91.5   | hIAN7     | <a href="#">NM_153236.2</a> | MGC27027                              |              |             |              |
| GI_28416947-S | 100.1  | 96.1   | 98.6   | TIGD4     | <a href="#">NM_145720.2</a> | MGC43837                              | DNA          | nucleus     | metal ion    |
| GI_28416948-S | 277.1  | 361.5  | 300    | IAN4L1    | <a href="#">NM_018384.2</a> | IAN4;IAN5;IMAP3;hIAN5;HIMAP3;FLJ11296 |              |             |              |
| GI_28416950-S | 159.8  | 175.4  | 168.5  | IL3RA     | <a href="#">NM_002183.2</a> | IL3R;CD123;IL3RX;IL3RY;IL3RAY;hIL-    | interleukin- | integral to | protein      |
| GI_28416951-S | 99.5   | 104.5  | 107.3  | IMAP1     | <a href="#">NM_130759.2</a> | HIMAP1;IMAP38                         |              |             |              |
| GI_28416952-S | 118.4  | 129.4  | 121.6  | ACAS2L    | <a href="#">NM_032501.2</a> | AceCS2L;MGC33843                      |              |             |              |
| GI_28416954-S | 85.4   | 107.4  | 94.5   | AZU1      | <a href="#">NM_001700.3</a> | AZU;HBP;NAZC;AZAMP;CAP37;HUMAZUR      | antibacteri  | extracellul | chemotaxi    |
| GI_28416955-S | 91     | 107.2  | 99.6   | hIAN6     | <a href="#">NM_175571.1</a> | DKFZp667I133                          |              |             |              |
| GI_28416957-S | 162.6  | 176.7  | 162.1  | HPS3      | <a href="#">NM_032383.3</a> | SUTAL;FLJ22704                        |              |             |              |
| GI_28460689-I | 107.2  | 98.2   | 108.1  | ADAMTS20  | <a href="#">NM_025003.2</a> |                                       | zinc ion     | extracellul | proteolysis  |

|               |         |        |        |           |                             |                                    |             |              |              |
|---------------|---------|--------|--------|-----------|-----------------------------|------------------------------------|-------------|--------------|--------------|
| GI_28460691-S | 349.7   | 408.7  | 360.8  | LOC153328 | <a href="#">NM_145282.1</a> |                                    | binding     | mitochond    | transport    |
| GI_28460693-S | 107     | 108.1  | 102.8  | TRAM1L1   | <a href="#">NM_152402.1</a> | MGC26568                           |             |              |              |
| GI_28461128-S | 795.6   | 732    | 779.2  | ANKMY2    | <a href="#">NM_020319.1</a> | ZMYND20;DKFZP564O043               |             |              |              |
| GI_28461132-S | 175.2   | 203.2  | 190.8  | TREM5     | <a href="#">NM_174892.1</a> |                                    | receptor    |              |              |
| GI_28461170-S | 1710.4  | 1665.2 | 1768.2 | SCRN1     | <a href="#">NM_014766.2</a> | SES1;KIAA0193                      | dipeptidas  |              | proteolysis  |
| GI_28461289-S | 100.7   | 116    | 104.4  | TRALPUSH  | <a href="#">NM_053002.2</a> | NOPAR;KIAA1635                     |             |              |              |
| GI_28466978-S | 100.3   | 93.6   | 98.5   | ARHGAP15  | <a href="#">NM_018460.2</a> | BM046                              |             |              |              |
| GI_28466982-S | 6618.4  | 6898.7 | 4591.5 | LEPREL2   | <a href="#">NM_014262.2</a> | GRCB;HSU47926                      | oxidoredu   |              | protein      |
| GI_28466986-I | 575.4   | 601.9  | 563.4  | MSCP      | <a href="#">NM_018579.2</a> | MSC;HT015;PRO1278;PRO1584          |             |              |              |
| GI_28466988-S | 1664.2  | 1320.9 | 1059.7 | ATP10D    | <a href="#">NM_020453.2</a> | ATPVD;KIAA1487                     | ATP         | integral to  | cation       |
| GI_28466990-S | 121.2   | 113    | 121.3  | TTBK2     | <a href="#">NM_173500.2</a> | TTBK;KIAA0847                      |             |              |              |
| GI_28466996-S | 2964.9  | 2296.2 | 2519.9 | DLG5      | <a href="#">NM_004747.2</a> | PDLG;KIAA0583                      | protein     | membran      | negative     |
| GI_28466998-I | 134.3   | 152.6  | 125    | ARG99     | <a href="#">NM_175861.1</a> |                                    |             |              |              |
| GI_28467002-I | 121.2   | 136.2  | 139.3  | KIS       | <a href="#">NM_175866.1</a> |                                    | cAMP-       | cytoplasm    | peptidyl-    |
| GI_28557676-I | 320.8   | 424.7  | 350.3  | PHF6      | <a href="#">NM_032458.1</a> | BFLS;KIAA1823;MGC14797             | electron    |              | electron     |
| GI_28557780-S | 303.4   | 781.2  | 385.2  | PRKCH     | <a href="#">NM_006255.2</a> | PKCL;PKC-L;PRKCL;MGC5363           | protein     |              | protein      |
| GI_28557782-I | 109.2   | 130.4  | 113.9  | RTN4      | <a href="#">NM_020532.3</a> | ASY;NOGO;NSP-CL;KIAA0886           | protein     | endoplas     | apoptosis    |
| GI_28558968-A | 289.5   | 374.5  | 304.3  | CRSP3     | <a href="#">NM_015979.2</a> | SUR2;CRSP130;CRSP133;DRIP130;DKFZp | transcripti |              | transcripti  |
| GI_28558968-I | 170.5   | 175.2  | 152    | CRSP3     | <a href="#">NM_015979.2</a> | SUR2;CRSP130;CRSP133;DRIP130;DKFZp | transcripti |              | transcripti  |
| GI_28558970-I | 97.4    | 105.6  | 109.4  | CRSP3     | <a href="#">NM_004830.2</a> | SUR2;CRSP130;CRSP133;DRIP130;DKFZp | transcripti |              | transcripti  |
| GI_28558972-S | 100.4   | 96.5   | 93.8   | CRSP2     | <a href="#">NM_004229.2</a> | CSR;RGR1;EXLM1;CXORF4;CRSP150;DR   | transcripti | nucleus      | transcripti  |
| GI_28558974-S | 233.2   | 230.4  | 212.9  | CRSP6     | <a href="#">NM_004268.3</a> | CRSP77;DRIP80;TRAP80;FLJ10812      | transcripti | nucleus      | transcripti  |
| GI_28558976-S | 112.3   | 117.7  | 121.2  | CRSP7     | <a href="#">NM_004831.2</a> | CRSP70                             | transcripti | nucleus      | transcripti  |
| GI_28558978-S | 2218.9  | 2420.1 | 2106   | CRSP8     | <a href="#">NM_004269.2</a> | CRAP34;CRSP34;MGC11274             | transcripti |              | transcripti  |
| GI_28558980-S | 344.5   | 349.8  | 353.8  | CRSP9     | <a href="#">NM_004270.3</a> | MED7;CRSP33;MGC12284               | transcripti | nucleus      | transcripti  |
| GI_28558989-A | 198     | 770.4  | 312.2  | TPO       | <a href="#">NM_175722.1</a> | MSA;TPX                            | peroxidase  | integral to  | thyroid      |
| GI_28558991-A | 99.3    | 107.3  | 95.2   | GRIK2     | <a href="#">NM_021956.2</a> | EAA4;GLR6;GLUR6                    | kainate     | integral to  | small        |
| GI_28558992-I | 324.9   | 444.4  | 357.4  | TG737     | <a href="#">NM_175605.2</a> | MGC26259;D13S1056E                 |             |              | excretion    |
| GI_28558997-A | 14591.1 | 13043  | 9502.2 | PTBP1     | <a href="#">NM_175847.1</a> | PTB;PTB2;PTB3;PTB4;pPTB;HNRPI;PTB- | poly-       | nucleoplas   | mRNA         |
| GI_28558999-S | 110     | 107.2  | 95.7   | HIST1H2BA | <a href="#">NM_170610.2</a> | STBP;H2BFU;TSH2B;bA317E16.3        | DNA         | chromoso     | nucleoso     |
| GI_28559000-S | 3893.1  | 4983   | 2355.5 | PRDX6     | <a href="#">NM_004905.2</a> | PRX;p29;AOP2;1-                    | phospholi   | cytosol      | response     |
| GI_28559001-S | 91.1    | 101.9  | 101.3  | ASB14     | <a href="#">NM_130387.4</a> | DKFZp313L0121                      |             |              | intracellula |
| GI_28559002-I | 98      | 110.2  | 102.5  | GRIK2     | <a href="#">NM_175768.1</a> | EAA4;GLR6;GLUR6                    | kainate     | integral to  | small        |
| GI_28559004-I | 111.9   | 126.4  | 108    | SSX2      | <a href="#">NM_003147.4</a> | SSX;HD21;MGC3884;MGC15364;HOM-MEL- |             |              |              |
| GI_28559005-A | 2708.7  | 3138   | 3443.5 | SSX2      | <a href="#">NM_175698.1</a> | SSX;HD21;MGC3884;MGC15364;HOM-MEL- |             |              |              |
| GI_28559007-I | 1044    | 1265.6 | 1371.5 | SSX3      | <a href="#">NM_021014.2</a> | MGC14495                           | tumor       |              |              |
| GI_28559008-A | 1703.6  | 1511.5 | 1216.9 | SSX3      | <a href="#">NM_175711.1</a> | MGC14495                           | tumor       |              |              |
| GI_28559008-I | 197.1   | 213.6  | 187    | SSX3      | <a href="#">NM_175711.1</a> | MGC14495                           | tumor       |              |              |
| GI_28559010-S | 761     | 960.7  | 1000.1 | SSX1      | <a href="#">NM_005635.2</a> | SSRC;MGC5162                       | transcripti | nucleus      | cell growth  |
| GI_28559011-I | 588.1   | 488.6  | 435.5  | SSX4      | <a href="#">NM_005636.3</a> | MGC12411                           | tumor       | intracellula | regulation   |
| GI_28559012-A | 423.6   | 485.2  | 491.6  | SSX4      | <a href="#">NM_175729.1</a> | MGC12411                           | tumor       | intracellula | regulation   |
| GI_28559014-I | 88.1    | 84.4   | 75     | SSX5      | <a href="#">NM_021015.3</a> | MGC9494                            | tumor       | intracellula | regulation   |
| GI_28559016-A | 563.5   | 668.9  | 613.4  | SSX5      | <a href="#">NM_175723.1</a> | MGC9494                            | tumor       | intracellula | regulation   |
| GI_28559018-S | 601.5   | 789.7  | 770.8  | SSX6      | <a href="#">NM_173357.2</a> |                                    |             |              |              |



|               |        |        |        |           |                             |                                     |              |             |             |
|---------------|--------|--------|--------|-----------|-----------------------------|-------------------------------------|--------------|-------------|-------------|
| GI_28559030-A | 96.9   | 115.2  | 103    | IL5RA     | <a href="#">NM_175728.1</a> | IL5R;CDw125;HSIL5R3;MGC26560        | interleukin- | integral to | signal      |
| GI_28559032-S | 102.2  | 106.8  | 98.4   | IL5       | <a href="#">NM_000879.2</a> | EDF;TRF;IL-5                        | interleukin- | extracellul | hypersens   |
| GI_28559038-S | 387.7  | 371.8  | 307    | PPARBP    | <a href="#">NM_004774.2</a> | PBP;CRSP1;RB18A;TRIP2;CRSP200;DRIP2 | transcripti  | obsolete    | regulation  |
| GI_28559059-I | 90     | 102.1  | 108.3  | DNMT3B    | <a href="#">NM_006892.3</a> | ICF;M.HsaIIIB                       | DNA          | cellular_co | DNA         |
| GI_28559062-A | 144.1  | 163.7  | 185.3  | DNMT3B    | <a href="#">NM_175849.1</a> | ICF;M.HsaIIIB                       | DNA          | cellular_co | DNA         |
| GI_28559064-I | 124.5  | 135.3  | 105.8  | DNMT3B    | <a href="#">NM_175850.1</a> | ICF;M.HsaIIIB                       | DNA          | cellular_co | DNA         |
| GI_28559066-I | 105    | 91.5   | 99.1   | DNMT3A    | <a href="#">NM_022552.3</a> | DNMT3A2;M.HsaIIIA                   | DNA          | nucleus     | DNA         |
| GI_28559067-I | 92.3   | 99.2   | 88     | DNMT3A    | <a href="#">NM_153759.2</a> | DNMT3A2;M.HsaIIIA                   | DNA          | nucleus     | DNA         |
| GI_28559070-A | 118    | 130.2  | 120.3  | DNMT3A    | <a href="#">NM_175630.1</a> | DNMT3A2;M.HsaIIIA                   | DNA          | nucleus     | DNA         |
| GI_28559070-I | 142.3  | 171.9  | 166.1  | DNMT3A    | <a href="#">NM_175630.1</a> | DNMT3A2;M.HsaIIIA                   | DNA          | nucleus     | DNA         |
| GI_28559072-I | 123.6  | 144.8  | 121.8  | SMOX      | <a href="#">NM_019025.2</a> | PAO;SMO;PAOh1;MGC1010;C20orf16;FLJ2 |              |             |             |
| GI_28559077-A | 2064   | 2134.4 | 1036.5 | SMOX      | <a href="#">NM_175841.1</a> | PAO;SMO;PAOh1;MGC1010;C20orf16;FLJ2 |              |             |             |
| GI_28559079-I | 168.5  | 189.7  | 176.2  | SMOX      | <a href="#">NM_175842.1</a> | PAO;SMO;PAOh1;MGC1010;C20orf16;FLJ2 |              |             |             |
| GI_28559082-A | 840.8  | 666.3  | 643.4  | CTPS2     | <a href="#">NM_019857.3</a> | MGC32997                            | CTP          |             | pyrimidine  |
| GI_28559082-I | 79.4   | 91.5   | 76.9   | CTPS2     | <a href="#">NM_019857.3</a> | MGC32997                            | CTP          |             | pyrimidine  |
| GI_28559084-I | 100.2  | 100.5  | 82.4   | CTPS2     | <a href="#">NM_175859.1</a> | MGC32997                            | CTP          |             | pyrimidine  |
| GI_28559087-S | 125.4  | 143.1  | 114.6  | LAMA2     | <a href="#">NM_000426.2</a> | LAMM                                | structural   | basement    | muscle      |
| GI_28559089-S | 1086.2 | 1220.1 | 1305.5 | MLH1      | <a href="#">NM_000249.2</a> | FCC2;COCA2;HNPC;hMLH1;HNPC2;MG      | adenosine    | nucleus     | mismatch    |
| GI_28565284-A | 180.8  | 234    | 194.4  | USP2      | <a href="#">NM_171997.1</a> | USP9;UBP41                          | cysteine-    |             | deubiquiti  |
| GI_28565284-I | 311.9  | 354.1  | 346.7  | USP2      | <a href="#">NM_171997.1</a> | USP9;UBP41                          | cysteine-    |             | deubiquiti  |
| GI_28570169-S | 88     | 88.3   | 90.3   | OR8B8     | <a href="#">NM_012378.1</a> | TPCR85                              | G-protein    | integral to | chemosen    |
| GI_28603817-S | 114.1  | 129.8  | 119.6  | MGC27169  | <a href="#">NM_176782.1</a> |                                     |              |             |             |
| GI_28603839-S | 2967.3 | 2710.5 | 2498.1 | MGC10120  | <a href="#">NM_173809.1</a> |                                     |              |             |             |
| GI_28605122-I | 116    | 132.7  | 123    | PSMD10    | <a href="#">NM_002814.2</a> | p28                                 |              |             | proteasom   |
| GI_28605136-A | 1582   | 2059.5 | 1961.8 | PSMD10    | <a href="#">NM_170750.1</a> | p28                                 |              |             | proteasom   |
| GI_28605144-S | 117    | 122.4  | 105.6  | GRIK3     | <a href="#">NM_000831.2</a> | EAA5;GLR7;GLUR7                     | glutamate    | membran     | small       |
| GI_28610146-I | 108.4  | 130.3  | 118.9  | IL6ST     | <a href="#">NM_002184.2</a> | CD130;GP130;CDw130;IL6R-beta;GP130- | gp130        | integral to | cell        |
| GI_28610148-A | 103.8  | 110    | 101.9  | IL6ST     | <a href="#">NM_175767.1</a> | CD130;GP130;CDw130;IL6R-beta;GP130- | gp130        | integral to | cell        |
| GI_28610150-S | 132.2  | 139.5  | 114.1  | IL7R      | <a href="#">NM_002185.2</a> | CD127;CDW127;IL-7R-alpha            | antigen      | integral to | regulation  |
| GI_28610152-S | 135.7  | 154    | 145.5  | IL7       | <a href="#">NM_000880.2</a> | IL-7                                | interleukin- | extracellul | positive    |
| GI_28610153-S | 700.1  | 539.4  | 392.9  | IL8       | <a href="#">NM_000584.2</a> | K60;NAF;GCP1;IL-8;LECT;LUCT;NAP1;3- | interleukin- | obsolete    | negative    |
| GI_28610154-A | 272.4  | 255.7  | 278.8  | CBFA2T2   | <a href="#">NM_005093.2</a> | EHT;MTGR1;ZMYND3                    | transcripti  | nucleus     | cell        |
| GI_28610155-I | 133.9  | 145.9  | 145.3  | CBFA2T2   | <a href="#">NM_175864.1</a> | EHT;MTGR1;ZMYND3                    | transcripti  | nucleus     | cell        |
| GI_28626509-S | 833.4  | 353.2  | 200.1  | RCN3      | <a href="#">NM_020650.2</a> | RLP49                               | calcium      |             | endoplas    |
| GI_28626515-S | 377.8  | 669.9  | 451.6  | PNMA2     | <a href="#">NM_007257.3</a> |                                     |              |             |             |
| GI_28626518-S | 149.8  | 175.4  | 178.9  | PSD       | <a href="#">NM_002779.2</a> | TYL;KIAA2011                        | signal       | cellular_co | signal      |
| GI_28626520-S | 588.2  | 831.3  | 987.8  | KIAA1404  | <a href="#">NM_021035.1</a> | FLJ11277                            |              |             |             |
| GI_28629867-S | 87.6   | 92.6   | 87.8   | RAG2      | <a href="#">NM_000536.1</a> |                                     | endonucle    | nucleus     | DNA         |
| GI_28629870-S | 88     | 105    | 87     | C20orf135 | <a href="#">NM_080622.1</a> | dJ591C20.1                          |              |             |             |
| GI_28827773-S | 700.6  | 747.8  | 651.9  | DYRK4     | <a href="#">NM_003845.1</a> |                                     | protein      | cellular_co | protein     |
| GI_28827775-S | 107.1  | 103.6  | 98.9   | LY9       | <a href="#">NM_002348.1</a> | hly9;mLY9;CD229;SLAMF3              | lymphocyt    | integral to | homophili   |
| GI_28827777-S | 715    | 765.1  | 761.3  | SEPN1     | <a href="#">NM_020451.1</a> | RSS;SELN;MDRS1;RSMD1                | selenium     | extracellul | biological_ |
| GI_28827788-S | 106.5  | 126.8  | 126    | NALP13    | <a href="#">NM_176810.1</a> | NOD14                               | sugar        |             | phosphoe    |
| GI_28827796-S | 101.6  | 106.2  | 98.5   | TAS2R38   | <a href="#">NM_176817.1</a> | PTC;T2R61                           |              |             |             |

|               |        |        |        |           |                             |                                     |             |             |             |
|---------------|--------|--------|--------|-----------|-----------------------------|-------------------------------------|-------------|-------------|-------------|
| GI_28830307-S | 105.8  | 109.1  | 118.6  | SULT1C2   | <a href="#">NM_006588.2</a> | SULT1C                              | sulfotransf | cellular_co | biological_ |
| GI_28849872-S | 114    | 126.5  | 100.3  | KIAA1383  | <a href="#">NM_019090.1</a> |                                     |             |             |             |
| GI_28866946-S | 171    | 148.6  | 145.4  | MT1F      | <a href="#">NM_005949.1</a> | MT1;MGC32732                        | zinc ion    | cytoplasm   | response    |
| GI_28866948-S | 95.6   | 100.5  | 88     | ILT10     | <a href="#">NM_024317.2</a> | LILRA5                              | receptor    |             |             |
| GI_28866959-S | 104.7  | 128.5  | 111.1  | MT1A      | <a href="#">NM_005946.1</a> | MT1;MTC;MGC32848                    | heavy       | cytoplasm   | heavy       |
| GI_28866965-S | 474.7  | 390.9  | 715.4  | MT1K      | <a href="#">NM_176870.1</a> | MT1;MT1M;MGC40498                   |             |             |             |
| GI_28872718-S | 486.2  | 824.4  | 417.9  | BTG2      | <a href="#">NM_006763.2</a> | PC3;TIS21                           | cell cycle  |             | DNA         |
| GI_28872719-A | 171.9  | 200.2  | 188.8  | P2RY2     | <a href="#">NM_002564.2</a> | P2U;HP2U;P2U1;P2UR;P2Y2;P2RU1;P2Y2R | receptor    | integral to | cell ion    |
| GI_28872721-S | 2019.3 | 2374.9 | 1797.5 | BTG3      | <a href="#">NM_006806.3</a> | ANA;TOB5;TOFA;TOB55;MGC8928         |             |             | negative    |
| GI_28872723-S | 141.1  | 141.7  | 146.2  | BTG4      | <a href="#">NM_017589.2</a> | PC3B;MGC33003                       |             |             |             |
| GI_28872724-S | 5577.8 | 6724.9 | 6174.8 | PSMD11    | <a href="#">NM_002815.2</a> | S9;p44.5;MGC3844                    |             |             | 26S         |
| GI_28872727-A | 3026.6 | 4035   | 3258.4 | PSMD13    | <a href="#">NM_002817.2</a> | p40.5;HSPC027                       |             |             | proteasom   |
| GI_28872729-I | 101    | 104.3  | 98.8   | PSMD13    | <a href="#">NM_175932.1</a> | p40.5;HSPC027                       |             |             | proteasom   |
| GI_28872731-I | 128.3  | 119.3  | 100.3  | MRPL43    | <a href="#">NM_176792.1</a> | bMRP36a;MGC17989;MGC48892           | structural  |             |             |
| GI_28872733-I | 1842   | 1940.3 | 1955.9 | MRPL43    | <a href="#">NM_032112.2</a> | bMRP36a;MGC17989;MGC48892           | structural  |             |             |
| GI_28872735-A | 746.5  | 697.2  | 796.1  | MRPL43    | <a href="#">NM_176793.1</a> | bMRP36a;MGC17989;MGC48892           | structural  |             |             |
| GI_28872737-I | 105.6  | 111.2  | 108.7  | MRPL43    | <a href="#">NM_176794.1</a> | bMRP36a;MGC17989;MGC48892           | structural  |             |             |
| GI_28872739-A | 1017   | 1243   | 1229.3 | MRPS11    | <a href="#">NM_176805.1</a> | HCC-2;FLJ22512;FLJ23406             | structural  | ribosome    | protein     |
| GI_28872741-S | 130.2  | 145.4  | 131.6  | P2RY1     | <a href="#">NM_002563.2</a> | P2Y1                                | receptor    | integral to | G-protein   |
| GI_28872742-I | 87.7   | 94.2   | 85.2   | P2RY2     | <a href="#">NM_176071.1</a> | P2U;HP2U;P2U1;P2UR;P2Y2;P2RU1;P2Y2R | receptor    | integral to | cell ion    |
| GI_28872744-I | 88.1   | 98.3   | 89.8   | P2RY2     | <a href="#">NM_176072.1</a> | P2U;HP2U;P2U1;P2UR;P2Y2;P2RU1;P2Y2R | receptor    | integral to | cell ion    |
| GI_28872746-S | 107.9  | 98.1   | 92.8   | P2RY4     | <a href="#">NM_002565.2</a> | NRU;P2P;UNR;P2Y4                    | uridine     | integral to | cytosolic   |
| GI_28872747-S | 682.8  | 639    | 553.8  | HIST3H2A  | <a href="#">NM_033445.2</a> | MGC3165                             | DNA         | nucleus     | nucleoso    |
| GI_28872748-S | 100.3  | 102.7  | 103.5  | HIST3H2BB | <a href="#">NM_175055.2</a> |                                     | DNA         | chromoso    | nucleoso    |
| GI_28872749-I | 128.8  | 129.5  | 125.3  | DUOX1     | <a href="#">NM_017434.3</a> | LNOX1;THOX1;NOXEF1                  |             |             |             |
| GI_28872750-A | 95.5   | 93.7   | 114    | DUOX1     | <a href="#">NM_175940.1</a> | LNOX1;THOX1;NOXEF1                  |             |             |             |
| GI_28872752-S | 230.5  | 294    | 271.3  | DUOX2     | <a href="#">NM_014080.3</a> | LNOX2;THOX2;NOXEF2;P138-TOX         | flavin-     | membran     | electron    |
| GI_28872754-A | 136.4  | 126.3  | 128.4  | FGF14     | <a href="#">NM_004115.2</a> | FHF4                                | growth      | extracellul | signal      |
| GI_28872754-I | 122.8  | 126    | 106.9  | FGF14     | <a href="#">NM_004115.2</a> | FHF4                                | growth      | extracellul | signal      |
| GI_28872755-I | 95.4   | 80.5   | 96.2   | FGF14     | <a href="#">NM_175929.1</a> | FHF4                                | growth      | extracellul | signal      |
| GI_28872757-I | 165.1  | 209.4  | 149    | PRPF4B    | <a href="#">NM_003913.3</a> | PR4H;PRP4;PRP4H;PRP4K;KIAA0536      | protein     | nucleus     | RNA         |
| GI_28872758-A | 287.4  | 250.7  | 189.7  | PRPF4B    | <a href="#">NM_176800.1</a> | PR4H;PRP4;PRP4H;PRP4K;KIAA0536      | protein     | nucleus     | RNA         |
| GI_28872758-I | 91.5   | 89.3   | 90.6   | PRPF4B    | <a href="#">NM_176800.1</a> | PR4H;PRP4;PRP4H;PRP4K;KIAA0536      | protein     | nucleus     | RNA         |
| GI_28872760-A | 113.2  | 124.6  | 130.3  | MTMR1     | <a href="#">NM_003828.1</a> |                                     | protein     |             | protein     |
| GI_28872762-I | 141.2  | 159.4  | 159    | MTMR1     | <a href="#">NM_176789.1</a> |                                     | protein     |             | protein     |
| GI_28872764-A | 347    | 430.9  | 282.4  | PSMD12    | <a href="#">NM_174871.1</a> | p55                                 |             | proteasom   |             |
| GI_28872775-A | 129    | 145.6  | 139.2  | DNMT2     | <a href="#">NM_176086.1</a> | PuMet;M.HsaIIIP                     | DNA         | nucleus     | DNA         |
| GI_28872779-A | 89.5   | 95.3   | 88.2   | DNMT3L    | <a href="#">NM_175867.1</a> | MGC1090                             | transcripti | nucleus     | DNA         |
| GI_28872781-I | 191.5  | 204.1  | 231.5  | CDK5RAP1  | <a href="#">NM_016408.2</a> | C42;CGI-05;HSPC167;C20orf34         | molecular   | cellular_co | brain       |
| GI_28872783-A | 1024.8 | 1050.5 | 1483.4 | CDK5RAP1  | <a href="#">NM_016082.3</a> | C42;CGI-05;HSPC167;C20orf34         | molecular   | cellular_co | brain       |
| GI_28872785-S | 1205.9 | 1822.2 | 1108.4 | CDK5RAP2  | <a href="#">NM_018249.3</a> | C48                                 | translation | cytoskelet  | brain       |
| GI_28872789-I | 334.2  | 405.1  | 401.5  | CDK5RAP3  | <a href="#">NM_176095.1</a> | C53;IC53;HSF-27;MST016;OK/SW-cl.114 | neuronal    | cellular_co | regulation  |
| GI_28872791-A | 2499.8 | 2117.9 | 2151.5 | CDK5RAP3  | <a href="#">NM_176096.1</a> | C53;IC53;HSF-27;MST016;OK/SW-cl.114 | neuronal    | cellular_co | regulation  |
| GI_28872793-S | 187.4  | 240.7  | 182.9  | CEBPA     | <a href="#">NM_004364.2</a> | CEBP;C/EBP-alpha                    | transcripti | nucleus     | energy      |

|               |        |        |        |            |                             |                                     |             |              |              |
|---------------|--------|--------|--------|------------|-----------------------------|-------------------------------------|-------------|--------------|--------------|
| GI_28872795-S | 14320  | 12523  | 15287  | CEBPB      | <a href="#">NM_005194.2</a> | LAP;CRP2;TCF5;IL6DBP;NF-            | transcripti | nucleus      | acute-       |
| GI_28872797-S | 533.7  | 847.9  | 509.8  | CEBPD      | <a href="#">NM_005195.2</a> | CELF;CRP3;C/EBP-delta;NF-IL6-beta   | DNA         | nucleus      | transcripti  |
| GI_28872799-S | 179.6  | 189.9  | 190.3  | CEBPE      | <a href="#">NM_001805.2</a> | CRP1;C/EBP-epsilon                  | transcripti | nucleus      | defense      |
| GI_28872801-S | 2553.5 | 2822.7 | 2446.2 | C1QBP      | <a href="#">NM_001212.3</a> | p32;HABP1;gC1qR;GC1QBP;SF2p32;gC1Q- |             | mitochond    | immune       |
| GI_28872802-I | 103.5  | 95.9   | 89.7   | CBFA2T3    | <a href="#">NM_005187.4</a> | MTG16;MTGR2;ZMYND4                  | transcripti |              | cell         |
| GI_28872804-A | 112.7  | 111.8  | 105    | CBFA2T3    | <a href="#">NM_175931.1</a> | MTG16;MTGR2;ZMYND4                  | transcripti |              | cell         |
| GI_28872804-I | 100.5  | 102.5  | 94.4   | CBFA2T3    | <a href="#">NM_175931.1</a> | MTG16;MTGR2;ZMYND4                  | transcripti |              | cell         |
| GI_28872806-S | 155.9  | 209.1  | 165.8  | CBLNL1     | <a href="#">NM_080617.3</a> | dJ885A10.1                          |             |              |              |
| GI_28872807-S | 127.1  | 191.6  | 268.4  | GAP43      | <a href="#">NM_002045.2</a> | B-50;PP46                           | calmoduli   | membran      | response     |
| GI_28872808-S | 196.3  | 223.5  | 224.2  | MATP       | <a href="#">NM_016180.2</a> | 1A1;AIM1                            |             | integral to  | melanin      |
| GI_28872811-S | 206.3  | 241.3  | 182.7  | ZCWCC3     | <a href="#">NM_015358.1</a> | NXP2;KIAA0136                       | ATP         |              |              |
| GI_28872813-S | 301.3  | 366.8  | 306.5  | SEMA4G     | <a href="#">NM_017893.2</a> | FLJ20590;KIAA1619                   |             |              |              |
| GI_28872862-S | 623.6  | 707.9  | 811.7  | KIAA1194   | <a href="#">NM_015455.2</a> | DKFZP564G1964                       |             |              |              |
| GI_28875781-S | 866.5  | 908.4  | 717.8  | DKFZp761C1 | <a href="#">NM_022913.1</a> | GPBP                                |             |              |              |
| GI_28875783-S | 286.3  | 299.7  | 270.4  | FLJ13063   | <a href="#">NM_024742.1</a> | FLJ00019                            |             |              |              |
| GI_28875785-S | 150.1  | 184.6  | 161.1  | FLJ00007   | <a href="#">NM_033449.1</a> |                                     |             |              |              |
| GI_28875796-S | 1432.6 | 1301.9 | 1118.4 | DKFZP547E1 | <a href="#">NM_015607.2</a> |                                     |             |              |              |
| GI_28875802-S | 102.3  | 146.5  | 113.4  | KIAA1924   | <a href="#">NM_153239.2</a> | FLJ36483                            |             |              |              |
| GI_28882025-S | 100.5  | 103.4  | 91.9   | TAS2R39    | <a href="#">NM_176881.1</a> |                                     | G-protein   | integral to  | G-protein    |
| GI_28882027-S | 119.1  | 122.7  | 121.7  | TAS2R41    | <a href="#">NM_176883.1</a> | T2R59                               | G-protein   | integral to  | G-protein    |
| GI_28882030-S | 104.8  | 117    | 107.9  | TAS2R44    | <a href="#">NM_176885.1</a> | T2R53                               |             |              |              |
| GI_28882032-S | 103.5  | 109.8  | 95.6   | TAS2R40    | <a href="#">NM_176882.1</a> |                                     | G-protein   | integral to  | G-protein    |
| GI_28882034-S | 113    | 115.6  | 113.5  | TAS2R48    | <a href="#">NM_176888.1</a> |                                     | G-protein   | integral to  | G-protein    |
| GI_28882036-S | 86.6   | 99.8   | 92.3   | TAS2R43    | <a href="#">NM_176884.1</a> | T2R52                               |             |              |              |
| GI_28882038-S | 86.1   | 82.5   | 94.5   | TAS2R50    | <a href="#">NM_176890.1</a> | T2R51                               |             |              |              |
| GI_28882040-S | 105.7  | 109.7  | 102.2  | TAS2R46    | <a href="#">NM_176887.1</a> | T2R54                               | G-protein   | integral to  | G-protein    |
| GI_28882046-S | 107.5  | 109.2  | 106.8  | TAS2R49    | <a href="#">NM_176889.1</a> | T2R56                               |             |              |              |
| GI_28882054-S | 139.1  | 172    | 159.6  | NRF1       | <a href="#">NM_005011.2</a> | ALPHA-PAL                           | transcripti | nucleus      | energy       |
| GI_28893580-A | 128.9  | 166.1  | 147.8  | LMX1A      | <a href="#">NM_177398.1</a> | LMX1;LMX-1;LMX1.1                   | transcripti | nucleus      | regulation   |
| GI_28912911-S | 89.9   | 103    | 87.2   | NKX6-2     | <a href="#">NM_177400.1</a> | GTX;NKX6B;NKX6.1;NKX6.2             | transcripti | nucleus      | regulation   |
| GI_28916690-A | 132.8  | 226.6  | 194.8  | MUC1       | <a href="#">NM_002456.3</a> | EMA;PEM;PUM;CD227                   | actin       | cytoskelet   |              |
| GI_28916695-A | 143.1  | 162.7  | 117.1  | GTF2IRD2   | <a href="#">NM_032203.3</a> | FLJ21423                            |             |              |              |
| GI_28916697-S | 344.9  | 296.9  | 295.2  | LOC63920   | <a href="#">NM_022090.2</a> |                                     |             |              |              |
| GI_28933450-S | 263.4  | 260.3  | 112    | PLXND1     | <a href="#">NM_015103.1</a> | PLEXD1;KIAA0620                     | receptor    | membran      | developm     |
| GI_28933464-S | 524.2  | 474    | 379.1  | STX12      | <a href="#">NM_177424.1</a> | STX13;STX14;MGC51957                | protein     | membran      | intracellula |
| GI_28951070-S | 102.3  | 125.2  | 126.4  | NOD27      | <a href="#">NM_032206.2</a> | FLJ21709                            |             |              |              |
| GI_28973794-S | 112.6  | 125    | 111.1  | TAS2R60    | <a href="#">NM_177437.1</a> | T2R60                               | G-protein   | integral to  | G-protein    |
| GI_28973798-I | 128.2  | 146.5  | 169.8  | MGC3123    | <a href="#">NM_177441.1</a> |                                     |             |              |              |
| GI_29029527-S | 117    | 98.1   | 103.2  | TRIM42     | <a href="#">NM_152616.3</a> | FLJ40097                            |             |              |              |
| GI_29029528-S | 2361.4 | 2455.1 | 2168.2 | TRIM44     | <a href="#">NM_017583.3</a> | MC7;DIPB;MGC3490;HSA249128          | zinc ion    | intracellula |              |
| GI_29029529-I | 146.9  | 174.3  | 171.2  | SULT1C1    | <a href="#">NM_176825.1</a> | ST1C1;ST1C2;SULT1C#1;humSULTC2      | sulfotransf | cytoplasm    | amine        |
| GI_29029531-A | 235.1  | 217.5  | 141.4  | SULT1C1    | <a href="#">NM_001056.2</a> | ST1C1;ST1C2;SULT1C#1;humSULTC2      | sulfotransf | cytoplasm    | amine        |
| GI_29029531-I | 205    | 224.1  | 167.6  | SULT1C1    | <a href="#">NM_001056.2</a> | ST1C1;ST1C2;SULT1C#1;humSULTC2      | sulfotransf | cytoplasm    | amine        |
| GI_29029532-A | 142    | 153.2  | 137.8  | SULT4A1    | <a href="#">NM_014351.2</a> | NST;BRSTL1;SULTX3;BR-STL-           | sulfotransf | cytosol      | steroid      |

|               |        |        |        |         |                             |                                    |             |             |             |
|---------------|--------|--------|--------|---------|-----------------------------|------------------------------------|-------------|-------------|-------------|
| GI_29029533-I | 86.8   | 95     | 88.8   | SULT4A1 | <a href="#">NM_176874.1</a> | NST;BRSTL1;SULTX3;BR-STL-          | sulfotransf | cytosol     | steroid     |
| GI_29029541-I | 90.7   | 94.3   | 87.4   | INADL   | <a href="#">NM_005799.2</a> | PATJ                               |             |             |             |
| GI_29029543-I | 119.3  | 134.7  | 126    | INADL   | <a href="#">NM_170605.2</a> | PATJ                               |             |             |             |
| GI_29029545-A | 108.8  | 123.5  | 103.1  | INADL   | <a href="#">NM_176877.1</a> | PATJ                               |             |             |             |
| GI_29029547-I | 92.4   | 100.8  | 87.6   | INADL   | <a href="#">NM_176878.1</a> | PATJ                               |             |             |             |
| GI_29029549-I | 181.4  | 240.2  | 223.8  | CECR1   | <a href="#">NM_017424.2</a> |                                    | growth      | cellular_co | nucleotide  |
| GI_29029551-A | 152.1  | 203.2  | 161.3  | CECR1   | <a href="#">NM_177405.1</a> |                                    | growth      | cellular_co | nucleotide  |
| GI_29029551-I | 103    | 116.5  | 93.7   | CECR1   | <a href="#">NM_177405.1</a> |                                    | growth      | cellular_co | nucleotide  |
| GI_29029553-S | 408.9  | 464    | 414.9  | BBS1    | <a href="#">NM_024649.4</a> | BBS2L2;FLJ23590                    |             |             |             |
| GI_29029554-A | 168.6  | 180.4  | 188.1  | BBS7    | <a href="#">NM_018190.2</a> | BBS2L1;FLJ10715                    |             |             | vision      |
| GI_29029554-I | 128.6  | 172.7  | 158.5  | BBS7    | <a href="#">NM_018190.2</a> | BBS2L1;FLJ10715                    |             |             | vision      |
| GI_29029556-I | 258.8  | 258.3  | 262.2  | BBS7    | <a href="#">NM_176824.1</a> | BBS2L1;FLJ10715                    |             |             | vision      |
| GI_29029558-I | 2409.1 | 2639.7 | 3306.6 | CSE1L   | <a href="#">NM_001316.2</a> | CAS;CSE1;XPO2                      | importin-   | nuclear     | nucleocyto  |
| GI_29029560-A | 1170.4 | 1138.2 | 1212   | CSE1L   | <a href="#">NM_177436.1</a> | CAS;CSE1;XPO2                      | importin-   | nuclear     | nucleocyto  |
| GI_29029560-I | 162.2  | 155.1  | 152.3  | CSE1L   | <a href="#">NM_177436.1</a> | CAS;CSE1;XPO2                      | importin-   | nuclear     | nucleocyto  |
| GI_29029562-A | 187.7  | 192.1  | 179.8  | CTMP    | <a href="#">NM_053055.2</a> | MGC29636                           |             |             |             |
| GI_29029570-I | 105.9  | 120.1  | 108.6  | CD86    | <a href="#">NM_006889.2</a> | B70;B7-2;LAB72;CD28LG2;MGC34413    | receptor    | integral to | positive    |
| GI_29029571-A | 110.8  | 141.2  | 126.8  | CD86    | <a href="#">NM_175862.2</a> | B70;B7-2;LAB72;CD28LG2;MGC34413    | receptor    | integral to | positive    |
| GI_29029571-I | 100.8  | 104.6  | 83     | CD86    | <a href="#">NM_175862.2</a> | B70;B7-2;LAB72;CD28LG2;MGC34413    | receptor    | integral to | positive    |
| GI_29029588-A | 1045.2 | 1519.2 | 1249.8 | FTSJ1   | <a href="#">NM_177434.1</a> | JM23;SPB1;CDLIV                    | methyltran  |             | rRNA        |
| GI_29029590-I | 132.7  | 141.4  | 128.5  | FTSJ1   | <a href="#">NM_177439.1</a> | JM23;SPB1;CDLIV                    | methyltran  |             | rRNA        |
| GI_29029592-S | 231.1  | 232.8  | 216.2  | EIF2C4  | <a href="#">NM_017629.2</a> | AGO4                               | translation |             | protein     |
| GI_29029594-S | 138.6  | 123.4  | 134.5  | GRIK4   | <a href="#">NM_014619.2</a> | KA1;EAA1;GRIK                      | kainate     | integral to | small       |
| GI_29029596-S | 96     | 92.8   | 83.5   | GRIK5   | <a href="#">NM_002088.3</a> | KA2;EAA2                           |             |             |             |
| GI_29029598-S | 113.5  | 122.5  | 122.3  | CYSLTR1 | <a href="#">NM_006639.2</a> | HG55;CYSLT1;CYSLTR;CYSLT1R;HMTMF8  | leukotrien  | membran     | cytosolic   |
| GI_29029599-S | 167.2  | 203.1  | 191.3  | CYSLTR2 | <a href="#">NM_020377.2</a> | GPCR;HG57;CYSLT2;HPN321;CYSLT2R;hG | leukotrien  | integral to | G-protein   |
| GI_29029600-S | 1145.1 | 909.1  | 1220   | DHX37   | <a href="#">NM_032656.2</a> | DDX37;MGC2695;MGC4322;KIAA1517;MGC |             |             |             |
| GI_29029602-S | 499.5  | 416.1  | 391.7  | P2RY11  | <a href="#">NM_002566.3</a> | P2Y11                              | receptor    | integral to | adenylate   |
| GI_29029604-A | 122.8  | 130.1  | 135.1  | P2RY12  | <a href="#">NM_176876.1</a> | HORK3;P2Y12;ADPG-                  | rhodopsin-  | integral to | hemostasi   |
| GI_29029606-I | 102.3  | 118.1  | 107.6  | P2RY6   | <a href="#">NM_004154.3</a> | P2Y6;MGC15335                      | G-protein   | integral to | G-protein   |
| GI_29029609-A | 133.3  | 198.5  | 250.6  | P2RY6   | <a href="#">NM_176797.1</a> | P2Y6;MGC15335                      | G-protein   | integral to | G-protein   |
| GI_29029611-I | 104.9  | 118.7  | 103.6  | P2RY6   | <a href="#">NM_176798.1</a> | P2Y6;MGC15335                      | G-protein   | integral to | G-protein   |
| GI_29029613-S | 99     | 111.9  | 102.6  | MAGEA10 | <a href="#">NM_021048.3</a> | MAGE10;MGC10599                    | tumor       |             |             |
| GI_29029614-S | 401.1  | 533.9  | 406.9  | MAGEA11 | <a href="#">NM_005366.3</a> | MAGE11;MGC10511                    | tumor       |             |             |
| GI_29029615-S | 1545   | 161.9  | 154.9  | MAGEA1  | <a href="#">NM_004988.3</a> | MAGE1;MGC9326                      | tumor       | plasma      |             |
| GI_29029616-I | 132.1  | 138.2  | 126.5  | MAGEA2  | <a href="#">NM_005361.2</a> | MAGE2;MAGEA2A                      | tumor       |             |             |
| GI_29029617-A | 181.5  | 192.2  | 130.6  | MAGEA2  | <a href="#">NM_175742.1</a> | MAGE2;MAGEA2A                      | tumor       |             |             |
| GI_29029619-I | 159.9  | 155.8  | 149.5  | MAGEA2  | <a href="#">NM_175743.1</a> | MAGE2;MAGEA2A                      | tumor       |             |             |
| GI_29029622-S | 1892   | 2135.9 | 1699   | MAGEA3  | <a href="#">NM_005362.3</a> | HIP8;HYPD;MAGE3;MGC14613           | tumor       |             |             |
| GI_29029623-S | 94.2   | 107.7  | 99.6   | MAGEA4  | <a href="#">NM_002362.3</a> | MAGE4;MAGE4A;MAGE4B;MAGE-41;MAGE-  | molecular   | cellular_co | biological_ |
| GI_29029624-S | 114.7  | 117.8  | 120.2  | MAGEA5  | <a href="#">NM_021049.2</a> | MAGE5                              | molecular   | cellular_co | biological_ |
| GI_29029625-A | 1656.8 | 2151.8 | 1825.9 | MAGEA6  | <a href="#">NM_005363.2</a> | MAGE6;MAGE3B;MAGE-3b;MGC52297      | molecular   | cellular_co | biological_ |
| GI_29029626-I | 165    | 186.2  | 185.1  | MAGEA6  | <a href="#">NM_175868.1</a> | MAGE6;MAGE3B;MAGE-3b;MGC52297      | molecular   | cellular_co | biological_ |
| GI_29029628-S | 113.7  | 127.7  | 119    | MAGEA8  | <a href="#">NM_005364.3</a> | MAGE8;MGC2182                      | molecular   | cellular_co | biological_ |

|               |         |        |        |           |                             |                                     |              |             |             |
|---------------|---------|--------|--------|-----------|-----------------------------|-------------------------------------|--------------|-------------|-------------|
| GI_29029631-S | 111.2   | 105    | 108.3  | ALK       | <a href="#">NM_004304.3</a> |                                     | receptor     | integral to | brain       |
| GI_29126184-S | 237.9   | 300.7  | 284.2  | MGC5391   | <a href="#">NM_032740.2</a> |                                     |              |             |             |
| GI_29126186-S | 117.7   | 102.4  | 109.3  | KIAA1984  | <a href="#">NM_032874.2</a> | MGC15438;bA216L13.7                 |              |             |             |
| GI_29126188-S | 105.6   | 104.3  | 96.5   | ARHGAP19  | <a href="#">NM_032900.2</a> | FLJ00194;MGC14258                   |              |             |             |
| GI_29126221-S | 202.2   | 213.8  | 231.5  | ZSWIM1    | <a href="#">NM_080603.2</a> | C20orf162;dJ337O18.5                |              |             |             |
| GI_29126235-S | 90.5    | 104.4  | 95.2   | PGSF1     | <a href="#">NM_174947.2</a> |                                     |              |             |             |
| GI_29126237-S | 20483.9 | 20423  | 17389  | BTF3      | <a href="#">NM_001207.3</a> | NACB;BTF3a;BTF3b;BETA-NAC           | RNA          | nucleus     | transcripti |
| GI_29126240-S | 174.7   | 207.6  | 180.1  | MTF       | <a href="#">NM_177478.1</a> |                                     | binding      |             | iron ion    |
| GI_29126244-S | 106.4   | 122.8  | 117.6  | TAS2R45   | <a href="#">NM_176886.1</a> | ZG24P                               | G-protein    | integral to | G-protein   |
| GI_29135342-S | 11926.5 | 12162  | 8876.9 | HINT1     | <a href="#">NM_005340.2</a> | HINT;PKCI-1;PRKCNH1                 | protein      | cytoskelet  | signal      |
| GI_29135352-S | 93.9    | 99.3   | 99.9   | C14orf61  | <a href="#">NM_177527.1</a> |                                     |              |             |             |
| GI_29171294-S | 214.8   | 199.4  | 140.5  | ARHJ      | <a href="#">NM_020663.2</a> | TCL;TC10B;RASL7B;FLJ14445           | Rho small    | cellular_co | small       |
| GI_29171679-S | 114.5   | 124.2  | 122.4  | IL8RA     | <a href="#">NM_000634.2</a> | CD128;CXCR1;IL8R1;CMKAR1;IL8RBA;CDw | interleukin- | membran     | chemotaxi   |
| GI_29171680-S | 110.2   | 109.5  | 118.2  | IL8RB     | <a href="#">NM_001557.2</a> | CXCR2;IL8R2;IL8RA;CMKAR2;CDw128b    | interleukin- | cytoplasm   | G-protein   |
| GI_29171681-A | 100     | 105.4  | 93.5   | IL9R      | <a href="#">NM_002186.2</a> |                                     | interleukin- | extracellul | signal      |
| GI_29171681-I | 148.5   | 186    | 156.6  | IL9R      | <a href="#">NM_002186.2</a> |                                     | interleukin- | extracellul | signal      |
| GI_29171683-I | 84.8    | 99.2   | 95.1   | IL9R      | <a href="#">NM_176786.1</a> |                                     | interleukin- | extracellul | signal      |
| GI_29171685-A | 631.4   | 605.3  | 493.1  | ILKAP     | <a href="#">NM_030768.2</a> | MGC4846;FLJ10181;PP2C-              | protein      | protein     | protein     |
| GI_29171686-I | 84.5    | 95     | 94.3   | ILKAP     | <a href="#">NM_176799.1</a> | MGC4846;FLJ10181;PP2C-              | protein      | protein     | protein     |
| GI_29171688-S | 126.2   | 125.3  | 110.2  | ILT7      | <a href="#">NM_012276.2</a> | LILRA4                              | receptor     | integral to | immune      |
| GI_29171690-I | 1014.8  | 820.3  | 725.7  | ILVBL     | <a href="#">NM_006844.3</a> | AHAS;209L8;ILV2H;MGC1269;MGC19535   | protein      |             | protein     |
| GI_29171691-A | 924.8   | 742.7  | 664.9  | ILVBL     | <a href="#">NM_176826.1</a> | AHAS;209L8;ILV2H;MGC1269;MGC19535   | protein      |             | protein     |
| GI_29171691-I | 145.4   | 153.6  | 139.9  | ILVBL     | <a href="#">NM_176826.1</a> | AHAS;209L8;ILV2H;MGC1269;MGC19535   | protein      |             | protein     |
| GI_29171701-I | 111.6   | 93.7   | 93.4   | PPA2      | <a href="#">NM_176869.1</a> | HSPC124;MGC49850;SID6-306           |              |             |             |
| GI_29171703-A | 1730.2  | 2170.2 | 1819.7 | MAGED2    | <a href="#">NM_014599.4</a> | 11B6;BCG1;HCA10;JCL-1;MAGED;MAGE-   |              |             |             |
| GI_29171703-I | 198.8   | 204.1  | 207.8  | MAGED2    | <a href="#">NM_014599.4</a> | 11B6;BCG1;HCA10;JCL-1;MAGED;MAGE-   |              |             |             |
| GI_29171704-I | 227     | 267.8  | 216.6  | MAGED2    | <a href="#">NM_177433.1</a> | 11B6;BCG1;HCA10;JCL-1;MAGED;MAGE-   |              |             |             |
| GI_29171706-I | 118     | 122.7  | 103.3  | MAGEB1    | <a href="#">NM_002363.3</a> | DAM10;MAGEL1;MAGE-Xp;MGC9322        | tumor        |             |             |
| GI_29171708-A | 108.5   | 95.1   | 93.4   | MAGEB1    | <a href="#">NM_177404.1</a> | DAM10;MAGEL1;MAGE-Xp;MGC9322        | tumor        |             |             |
| GI_29171708-I | 104.1   | 95.8   | 90.5   | MAGEB1    | <a href="#">NM_177404.1</a> | DAM10;MAGEL1;MAGE-Xp;MGC9322        | tumor        |             |             |
| GI_29171715-S | 97.4    | 111.6  | 96     | MAGEB4    | <a href="#">NM_002367.2</a> | MGC33144                            | tumor        |             |             |
| GI_29171716-I | 140.9   | 156.6  | 136.8  | GPLD1     | <a href="#">NM_001503.2</a> | GPIPLD;PIGPLD;GPIPLDM;PIGPLD1;MGC2  | phospholi    |             |             |
| GI_29171718-A | 95.5    | 88.4   | 80.1   | GPLD1     | <a href="#">NM_177483.1</a> | GPIPLD;PIGPLD;GPIPLDM;PIGPLD1;MGC2  | phospholi    |             |             |
| GI_29171718-I | 88.3    | 116.5  | 102.1  | GPLD1     | <a href="#">NM_177483.1</a> | GPIPLD;PIGPLD;GPIPLDM;PIGPLD1;MGC2  | phospholi    |             |             |
| GI_29171720-I | 85.5    | 88.9   | 87.5   | GPR86     | <a href="#">NM_023914.2</a> | GPCR1;GPR94;P2Y13;SP174;FKSG77      | receptor     | integral to | G-protein   |
| GI_29171722-A | 294.6   | 360.9  | 335.4  | GPR86     | <a href="#">NM_176894.1</a> | GPCR1;GPR94;P2Y13;SP174;FKSG77      | receptor     | integral to | G-protein   |
| GI_29171722-I | 117.8   | 118.7  | 113.7  | GPR86     | <a href="#">NM_176894.1</a> | GPCR1;GPR94;P2Y13;SP174;FKSG77      | receptor     | integral to | G-protein   |
| GI_29171724-S | 100.4   | 99.3   | 92.1   | HIST1H2AA | <a href="#">NM_170745.2</a> | H2AFR;bA317E16.2                    | DNA          | nucleus     | nucleoso    |
| GI_29171725-S | 100.9   | 97.9   | 99.7   | PLN       | <a href="#">NM_002667.2</a> | PLB                                 | calcium      | smooth      | calcium     |
| GI_29171726-A | 436.7   | 357.6  | 475.3  | CYP20A1   | <a href="#">NM_020674.2</a> | CYP-M;MGC22229                      |              |             |             |
| GI_29171728-S | 127.7   | 144.3  | 121.7  | HIST2H2AB | <a href="#">NM_175065.2</a> |                                     | DNA          | nucleus     | nucleoso    |
| GI_29171729-I | 111.5   | 103.5  | 116.4  | CYP20A1   | <a href="#">NM_177538.1</a> | CYP-M;MGC22229                      |              |             |             |
| GI_29171731-S | 325.8   | 382.6  | 348.8  | CPXM      | <a href="#">NM_019609.2</a> | CPX1                                | carboxype    |             | proteolysis |
| GI_29171732-S | 642.9   | 849.8  | 852.7  | EIF2C1    | <a href="#">NM_012199.2</a> | Q99;AGO1;EIF2C;GERP95               | translation  | eukaryotic  | regulation  |

|               |         |        |        |          |                             |                                    |             |              |              |
|---------------|---------|--------|--------|----------|-----------------------------|------------------------------------|-------------|--------------|--------------|
| GI_29171733-S | 378     | 353.9  | 385.6  | EIF2C2   | <a href="#">NM_012154.2</a> | Q10;AGO2;MGC3183                   | translation | cellular_co  | protein      |
| GI_29171735-A | 269.7   | 274.7  | 309.6  | PPAP2A   | <a href="#">NM_003711.2</a> | PAP2;PAP-2a                        | protein     | membran      | germ-cell    |
| GI_29171735-I | 193.2   | 191.7  | 188.6  | PPAP2A   | <a href="#">NM_003711.2</a> | PAP2;PAP-2a                        | protein     | membran      | germ-cell    |
| GI_29171737-I | 121.7   | 142.8  | 118.2  | PPAP2A   | <a href="#">NM_176895.1</a> | PAP2;PAP-2a                        | protein     | membran      | germ-cell    |
| GI_29171739-I | 154.8   | 139    | 143.4  | PPAP2B   | <a href="#">NM_003713.3</a> | VCIP;Dri42;PAP-2b;PAP2-b;MGC15306  | protein     | membran      | germ-cell    |
| GI_29171741-A | 428.3   | 431.3  | 253.9  | PPAP2B   | <a href="#">NM_177414.1</a> | VCIP;Dri42;PAP-2b;PAP2-b;MGC15306  | protein     | membran      | germ-cell    |
| GI_29171744-A | 1875.5  | 1820.7 | 1906.8 | PPAP2C   | <a href="#">NM_177526.1</a> | PAP-2c;PAP2-g                      | protein     | membran      |              |
| GI_29171746-I | 155     | 177.4  | 160    | PPAP2C   | <a href="#">NM_177543.1</a> | PAP-2c;PAP2-g                      | protein     | membran      |              |
| GI_29171748-I | 452.6   | 480.6  | 404.2  | PPARD    | <a href="#">NM_006238.2</a> | FAAR;NUC1;NUC1;NR1C2;NUCII;PPARB;M | steroid     | nucleus      | lipid        |
| GI_29171749-A | 144.5   | 165.8  | 142.9  | PPARD    | <a href="#">NM_177435.1</a> | FAAR;NUC1;NUC1;NR1C2;NUCII;PPARB;M | steroid     | nucleus      | lipid        |
| GI_29171749-I | 132.2   | 153.8  | 154.2  | PPARD    | <a href="#">NM_177435.1</a> | FAAR;NUC1;NUC1;NR1C2;NUCII;PPARB;M | steroid     | nucleus      | lipid        |
| GI_29171751-I | 1409.8  | 1230.6 | 894.5  | PPFIA1   | <a href="#">NM_003626.2</a> | LIP1;LIP.1;LIPRIN;MGC26800         | signal      | focal        | cell-matrix  |
| GI_29171752-A | 266.2   | 249.5  | 267.8  | PPFIA1   | <a href="#">NM_177423.1</a> | LIP1;LIP.1;LIPRIN;MGC26800         | signal      | focal        | cell-matrix  |
| GI_29171752-I | 184     | 161.5  | 245.1  | PPFIA1   | <a href="#">NM_177423.1</a> | LIP1;LIP.1;LIPRIN;MGC26800         | signal      | focal        | cell-matrix  |
| GI_29171754-S | 93.3    | 91.7   | 79.1   | PPFIA2   | <a href="#">NM_003625.2</a> |                                    | cell        | focal        | cell-matrix  |
| GI_29171756-S | 10221.8 | 10195  | 7065.4 | NPC2     | <a href="#">NM_006432.3</a> | HE1;NP-C2;MGC1333                  | molecular   | cellular_co  | biological_  |
| GI_29171757-S | 134.8   | 163    | 140.1  | DCSTAMP  | <a href="#">NM_030788.2</a> | FIND                               | phospholi   | integral to  | lipid        |
| GI_29171760-S | 5859.8  | 5165.2 | 4308.9 | PP       | <a href="#">NM_021129.2</a> | PPA1;IOPPP;PPase;SID6-8061         | inorganic   |              | phosphate    |
| GI_29171761-S | 91.6    | 88.1   | 81.9   | GSC      | <a href="#">NM_173849.2</a> |                                    | transcripti | nucleus      | gastrulatio  |
| GI_29244580-S | 296.3   | 304.5  | 272.9  | HIP14    | <a href="#">NM_015336.1</a> | HIP3;HYPH;ZDHHC17;KIAA0946         |             |              |              |
| GI_29244922-S | 697.1   | 572.4  | 360.7  | CGI-09   | <a href="#">NM_015939.3</a> | MGC5029                            |             |              |              |
| GI_29244923-S | 298     | 361.6  | 418.3  | CHD6     | <a href="#">NM_032221.3</a> | CHD5;RIGB;KIAA1335                 | transporte  | membran      | transport    |
| GI_29244925-S | 115     | 130.6  | 118.2  | CRN      | <a href="#">NM_006587.2</a> | ATC2                               | serine-     | integral to  | regulation   |
| GI_29294620-A | 181.5   | 226.6  | 194.8  | TAS1R1   | <a href="#">NM_177541.1</a> | TR1;T1R1;GPR70;gm148               |             |              |              |
| GI_29294622-A | 13348.6 | 14335  | 12264  | SNRPD2   | <a href="#">NM_004597.4</a> | SMD2                               | small       | spliceoso    | mRNA         |
| GI_29294623-I | 185.8   | 175    | 158.8  | SNRPD2   | <a href="#">NM_177542.1</a> | SMD2                               | small       | spliceoso    | mRNA         |
| GI_29294626-I | 308.4   | 249.6  | 257.4  | PPFIBP1  | <a href="#">NM_003622.2</a> | L2                                 | protein     | plasma       | cell         |
| GI_29294628-A | 120.1   | 122.8  | 113.6  | PPFIBP1  | <a href="#">NM_177444.1</a> | L2                                 | protein     | plasma       | cell         |
| GI_29294628-I | 107.3   | 118.5  | 90.6   | PPFIBP1  | <a href="#">NM_177444.1</a> | L2                                 | protein     | plasma       | cell         |
| GI_29294634-I | 100.4   | 100.2  | 101.7  | MEST     | <a href="#">NM_177524.1</a> | PEG1;MGC8703                       | epoxide     |              | mesoderm     |
| GI_29294636-A | 112.9   | 121.9  | 121.9  | MEST     | <a href="#">NM_177525.1</a> | PEG1;MGC8703                       | epoxide     |              | mesoderm     |
| GI_29294636-I | 106.4   | 112.5  | 106.4  | MEST     | <a href="#">NM_177525.1</a> | PEG1;MGC8703                       | epoxide     |              | mesoderm     |
| GI_29294638-I | 121.6   | 121.1  | 119.8  | MEST     | <a href="#">NM_002402.2</a> | PEG1;MGC8703                       | epoxide     |              | mesoderm     |
| GI_29294642-A | 83.4    | 92.6   | 91.5   | LYNX1    | <a href="#">NM_177458.1</a> | SLURP2;MGC40364                    |             |              |              |
| GI_29294642-I | 122.6   | 124.8  | 129.9  | LYNX1    | <a href="#">NM_177458.1</a> | SLURP2;MGC40364                    |             |              |              |
| GI_29294644-I | 111     | 104.1  | 105.7  | LYNX1    | <a href="#">NM_177477.1</a> | SLURP2;MGC40364                    |             |              |              |
| GI_29294646-I | 139.5   | 159.4  | 165.6  | EIF2C3   | <a href="#">NM_024852.2</a> | AGO3;FLJ12765                      |             |              |              |
| GI_29294648-A | 384.7   | 376.1  | 436.8  | DICER1   | <a href="#">NM_030621.2</a> | Dicer;HERNA;KIAA0928               | double-     | intracellula | RNA          |
| GI_29294648-I | 89.3    | 79     | 79.6   | DICER1   | <a href="#">NM_030621.2</a> | Dicer;HERNA;KIAA0928               | double-     | intracellula | RNA          |
| GI_29294650-I | 102.7   | 103.9  | 95.8   | DICER1   | <a href="#">NM_177438.1</a> | Dicer;HERNA;KIAA0928               | double-     | intracellula | RNA          |
| GI_29294652-I | 199.1   | 219.9  | 197.6  | FTSJ2    | <a href="#">NM_177442.1</a> | FJH1                               | methyltran  | nucleus      | rRNA         |
| GI_29294654-A | 135.8   | 147.3  | 126.8  | MAGEC3   | <a href="#">NM_177456.1</a> | HCA2;MAGE-C3                       |             |              |              |
| GI_29294654-I | 80      | 85.6   | 82     | MAGEC3   | <a href="#">NM_177456.1</a> | HCA2;MAGE-C3                       |             |              |              |
| GI_29336036-S | 103.5   | 89.7   | 97     | KIAA1444 | <a href="#">NM_032512.1</a> | LU1                                | protein     |              | intracellula |

|               |        |        |        |          |                             |                                |             |              |             |
|---------------|--------|--------|--------|----------|-----------------------------|--------------------------------|-------------|--------------|-------------|
| GI_29336042-S | 130.6  | 114.1  | 93.6   | ATCAY    | <a href="#">NM_033064.1</a> | CLAC;BNIP-H;KIAA1872           |             |              | transport   |
| GI_29336076-S | 109.2  | 105.3  | 100.8  | UNC93A   | <a href="#">NM_018974.2</a> | dJ366N23.1;dJ366N23.2          |             |              |             |
| GI_29336082-S | 195.6  | 289.2  | 264.5  | FLJ12584 | <a href="#">NM_025139.2</a> | ARM;KIAA1868                   |             |              |             |
| GI_29337282-I | 98.1   | 86.9   | 92.6   | LYNX1    | <a href="#">NM_177476.1</a> | SLURP2;MGC40364                |             |              |             |
| GI_29337284-S | 1978.1 | 1435   | 1357.7 | CHIC2    | <a href="#">NM_012110.2</a> | BTL;MGC21173                   | molecular   | cellular_co  | biological_ |
| GI_29337285-A | 269.6  | 354.9  | 282    | EIF2C3   | <a href="#">NM_177422.1</a> | AGO3;FLJ12765                  |             |              |             |
| GI_29337287-S | 816.6  | 590.5  | 558.4  | GAS41    | <a href="#">NM_006530.2</a> | NUBI-1                         | DNA         | nucleus      | oncogene    |
| GI_29337288-S | 147.6  | 151.8  | 123.8  | ABI3     | <a href="#">NM_016428.2</a> | NESH                           |             |              |             |
| GI_29337289-S | 134.3  | 155.1  | 129.8  | MAGEB6   | <a href="#">NM_173523.2</a> | MAGE-B6;FLJ40242               |             |              |             |
| GI_29337293-A | 625.1  | 762.4  | 104.6  | MAGED4   | <a href="#">NM_177535.1</a> | MAGE1;MAGE-E1;MGC3210;KIAA1859 |             |              |             |
| GI_29337297-S | 104.6  | 1531.1 | 98.1   | MAGEE1   | <a href="#">NM_016249.2</a> | CT10;HCA587;MAGEC2;MGC13377    | tumor       |              |             |
| GI_29366811-S | 113.4  | 105.5  | 103.2  | KLK9     | <a href="#">NM_012315.1</a> | KLKL3;KLK-L3                   | trypsin     | extracellul  | proteolysis |
| GI_29469068-S | 226.3  | 250.1  | 233.5  | HIPK3    | <a href="#">NM_005734.2</a> | PKY;YAK1;DYRK6                 | protein     | cellular_co  | protein     |
| GI_29469070-S | 469.9  | 534.7  | 373.1  | RICS     | <a href="#">NM_014715.2</a> | GRIT;GC-                       |             |              |             |
| GI_29501806-I | 162.5  | 192.9  | 163.7  | KLC2L    | <a href="#">NM_177417.1</a> | KLC2;KLCt;KNS2B                |             |              |             |
| GI_29501808-S | 94     | 95.4   | 90.1   | FLJ36046 | <a href="#">NM_152612.2</a> |                                |             |              |             |
| GI_29540530-A | 212.7  | 328.8  | 182.6  | SULT1A1  | <a href="#">NM_001055.2</a> | PST;STP;STP1;P-                | sulfotransf |              | amine       |
| GI_29540538-I | 174.5  | 227.4  | 210.8  | SULT1A1  | <a href="#">NM_177534.1</a> | PST;STP;STP1;P-                | sulfotransf |              | amine       |
| GI_29540542-I | 88.7   | 91.9   | 92.3   | SULT1A1  | <a href="#">NM_177536.1</a> | PST;STP;STP1;P-                | sulfotransf |              | amine       |
| GI_29540544-S | 99.8   | 111.4  | 111.3  | SULT2A1  | <a href="#">NM_003167.2</a> | HST;ST2;STD;hStA;ST2A3;DHEA-ST | sulfotransf |              | steroid     |
| GI_29540546-A | 530.6  | 787.4  | 529.9  | TRO      | <a href="#">NM_177557.1</a> | MAGED3;MAGE-d3;KIAA1114        |             | integral to  | embryo      |
| GI_29540554-I | 83.8   | 103.1  | 92.2   | SNRPN    | <a href="#">NM_022807.2</a> | SMN;SM-D;HCERN3;SNRNP-N        | small       | spliceoso    | mRNA        |
| GI_29540556-A | 1172.5 | 1283   | 1075.5 | SNRPN    | <a href="#">NM_003097.3</a> | SMN;SM-D;HCERN3;SNRNP-N        | small       | spliceoso    | mRNA        |
| GI_29540558-I | 243.6  | 290.8  | 269.5  | GAS2     | <a href="#">NM_177553.1</a> | MGC32610                       |             | actin        | cell growth |
| GI_29540560-A | 101.6  | 90.2   | 114.7  | GAS2     | <a href="#">NM_005256.2</a> | MGC32610                       |             | actin        | cell growth |
| GI_29540561-I | 98.7   | 105.2  | 88     | ALEX2    | <a href="#">NM_177949.1</a> | MGC8742;KIAA0512;MGC13343      |             |              |             |
| GI_29540565-A | 350.3  | 397    | 358.5  | ALEX3    | <a href="#">NM_177948.1</a> | MGC12199                       |             |              |             |
| GI_29540565-I | 220.1  | 253.6  | 223.6  | ALEX3    | <a href="#">NM_177948.1</a> | MGC12199                       |             |              |             |
| GI_29542730-A | 332    | 364.1  | 376.9  | ARL5     | <a href="#">NM_177985.1</a> |                                | small       |              | small       |
| GI_29542733-I | 201.3  | 232.7  | 233.2  | ARL5     | <a href="#">NM_012097.2</a> |                                | small       |              | small       |
| GI_29543553-I | 92.8   | 112.6  | 188.6  | TRIM9    | <a href="#">NM_015163.3</a> | RNF91;SPRING;KIAA0282          | zinc ion    | intracellula |             |
| GI_29543554-A | 107.8  | 129.2  | 129.1  | TRIM9    | <a href="#">NM_052978.2</a> | RNF91;SPRING;KIAA0282          | zinc ion    | intracellula |             |
| GI_29543554-I | 123.5  | 150.6  | 209.7  | TRIM9    | <a href="#">NM_052978.2</a> | RNF91;SPRING;KIAA0282          | zinc ion    | intracellula |             |
| GI_29544725-I | 86     | 102.9  | 89.7   | DOK5     | <a href="#">NM_018431.2</a> | MGC16926;C20orf180             | insulin     |              |             |
| GI_29544739-A | 96.6   | 105    | 94     | DOK5     | <a href="#">NM_177959.1</a> | MGC16926;C20orf180             | insulin     |              |             |
| GI_29544746-S | 114.7  | 110.9  | 113.6  | MYO1A    | <a href="#">NM_005379.2</a> | BBMI;MIHC;MYHL                 | myosin      | brush        | hearing     |
| GI_29544752-S | 145    | 153.7  | 144.9  | MYO3A    | <a href="#">NM_017433.3</a> | DFNB30                         | protein-    | myosin       | protein     |
| GI_29550827-S | 1414.1 | 1643.1 | 1340.7 | ACBD3    | <a href="#">NM_022735.3</a> | PAP7;GCP60;GOCAP1;GOLPH1       |             |              |             |
| GI_29550837-I | 110.4  | 116.4  | 108.4  | GOLPH2   | <a href="#">NM_016548.2</a> | GP73;PSEC0257                  |             | Golgi        |             |
| GI_29550849-A | 173    | 200.7  | 193.5  | GOLPH2   | <a href="#">NM_177937.1</a> | GP73;PSEC0257                  |             | Golgi        |             |
| GI_29550849-I | 96.9   | 97.7   | 93     | GOLPH2   | <a href="#">NM_177937.1</a> | GP73;PSEC0257                  |             | Golgi        |             |
| GI_29550859-S | 1457.7 | 1658.5 | 1587.4 | GOLPH3   | <a href="#">NM_022130.3</a> | GOPP1;GPP34;FLJ90675           |             |              |             |
| GI_29550878-A | 86.7   | 91.7   | 76.2   | SULT1A2  | <a href="#">NM_001054.2</a> | STP2;HAST4;P-PST;ST1A2;TSPST2  | sulfotransf |              | amine       |
| GI_29550892-I | 109.2  | 103.9  | 92.7   | SULT1A2  | <a href="#">NM_177528.1</a> | STP2;HAST4;P-PST;ST1A2;TSPST2  | sulfotransf |              | amine       |

|               |         |        |        |          |                             |                                     |             |             |              |
|---------------|---------|--------|--------|----------|-----------------------------|-------------------------------------|-------------|-------------|--------------|
| GI_29550920-A | 348     | 590.3  | 367.2  | SULT1A3  | <a href="#">NM_177552.1</a> | STM;HAST;HAST3;M-PST;TL-PST         | aryl        | cytoplasm   | synaptic     |
| GI_29550920-I | 109     | 139.6  | 95.2   | SULT1A3  | <a href="#">NM_177552.1</a> | STM;HAST;HAST3;M-PST;TL-PST         | aryl        | cytoplasm   | synaptic     |
| GI_29550927-S | 102.1   | 101.3  | 93.2   | SULT1B1  | <a href="#">NM_014465.2</a> | ST1B2;SULT1B2;MGC13356              | sulfotransf |             | biogenic     |
| GI_29553943-S | 93.7    | 107.6  | 92.9   | SALF     | <a href="#">NM_172311.1</a> |                                     | transcripti | nucleus     | transcripti  |
| GI_29553952-S | 125.2   | 171.5  | 136.4  | SULT1E1  | <a href="#">NM_005420.2</a> | EST;EST-1;MGC34459                  | estrone     |             | steroid      |
| GI_29553969-A | 402     | 764.3  | 951.9  | H2AFJ    | <a href="#">NM_177925.1</a> | MGC921;FLJ10903                     | DNA         | nucleus     | nucleoso     |
| GI_29553969-I | 111.6   | 149.7  | 144.2  | H2AFJ    | <a href="#">NM_177925.1</a> | MGC921;FLJ10903                     | DNA         | nucleus     | nucleoso     |
| GI_29553976-I | 131.3   | 153    | 154.3  | H2AFJ    | <a href="#">NM_018267.2</a> | MGC921;FLJ10903                     | DNA         | nucleus     | nucleoso     |
| GI_29553982-S | 469.8   | 722    | 367.1  | HIST2H4  | <a href="#">NM_003548.2</a> | H4;H4F2;H4FN                        |             |             |              |
| GI_29557854-A | 214.1   | 231.8  | 217    | PPM1A    | <a href="#">NM_177951.1</a> | PP2CA;MGC9201;PP2C-ALPHA            | protein     | protein     | protein      |
| GI_29557854-I | 180.8   | 209.8  | 222.9  | PPM1A    | <a href="#">NM_177951.1</a> | PP2CA;MGC9201;PP2C-ALPHA            | protein     | protein     | protein      |
| GI_29557938-I | 192.8   | 222.6  | 201.2  | PPM1A    | <a href="#">NM_177952.1</a> | PP2CA;MGC9201;PP2C-ALPHA            | protein     | protein     | protein      |
| GI_29558021-I | 639.6   | 465.1  | 431.8  | PPM1B    | <a href="#">NM_177968.1</a> | PP2CB;MGC21657;PP2CBETA;PPC2BETAX   | protein     | protein     | protein      |
| GI_29558098-A | 526.1   | 496.6  | 425.5  | PPM1B    | <a href="#">NM_177969.1</a> | PP2CB;MGC21657;PP2CBETA;PPC2BETAX   | protein     | protein     | protein      |
| GI_29558519-S | 276.2   | 327.7  | 303.4  | PPM1D    | <a href="#">NM_003620.2</a> | WIP1;PP2C-DELTA                     | protein     | nucleus     | DNA          |
| GI_29568085-S | 8958.5  | 7394   | 6397   | SDC1     | <a href="#">NM_002997.3</a> | SDC;CD138;SYND1                     | syndecan    | proteoglyc  |              |
| GI_29568092-S | 10306.4 | 12416  | 11554  | MRLC2    | <a href="#">NM_033546.2</a> | MLC-B                               | calcium     |             |              |
| GI_29568100-S | 954.4   | 861.1  | 833.7  | ATP5L    | <a href="#">NM_006476.3</a> | ATP5JG                              | hydrogen    | mitochond   | proton       |
| GI_29568104-S | 172.7   | 198.7  | 161.2  | TMEFF1   | <a href="#">NM_003692.2</a> | H7365;C9ORF2                        | serine      | integral to |              |
| GI_29568108-S | 173.5   | 178.7  | 174.3  | DOCK4    | <a href="#">NM_014705.2</a> | FLJ34238;KIAA0716                   |             | membran     | cell growth  |
| GI_29568112-I | 110.8   | 126.7  | 118.4  | MAGI-3   | <a href="#">NM_020965.2</a> |                                     | kinase      |             | intracellula |
| GI_29570772-I | 406.2   | 523.7  | 464.2  | PH-4     | <a href="#">NM_017732.2</a> | FLJ20262                            | calcium     | endoplas    |              |
| GI_29570774-I | 192.7   | 211.7  | 253.5  | DNCL2A   | <a href="#">NM_177953.1</a> | BLP;BITH;DNLC2A;HSPC162;MGC15113    | microtubul  | cytoplasm   | microtubul   |
| GI_29570776-I | 304.9   | 360.4  | 343.2  | DNCL2A   | <a href="#">NM_177954.1</a> | BLP;BITH;DNLC2A;HSPC162;MGC15113    | microtubul  | cytoplasm   | microtubul   |
| GI_29570778-A | 3955    | 4330.6 | 6419.8 | DNCL2A   | <a href="#">NM_014183.2</a> | BLP;BITH;DNLC2A;HSPC162;MGC15113    | microtubul  | cytoplasm   | microtubul   |
| GI_29570779-S | 199.3   | 212.4  | 184.9  | AAK1     | <a href="#">NM_014911.2</a> | KIAA1048                            | ATP         |             | protein      |
| GI_29570781-S | 1417.2  | 1228.3 | 1514.7 | ASXL1    | <a href="#">NM_015338.3</a> | KIAA0978                            |             | nucleus     | regulation   |
| GI_29570783-S | 157.8   | 192.6  | 172.4  | CHRNA4   | <a href="#">NM_000744.2</a> | BFNC;NACRA4                         | nicotinic   | nicotinic   | small        |
| GI_29570784-S | 81      | 78     | 91.2   | CTCF     | <a href="#">NM_080618.2</a> | BORIS;CTCF-T;dJ579F20.2             | DNA         | nucleus     | regulation   |
| GI_29570786-S | 797.4   | 653    | 1026.7 | CTNBL1   | <a href="#">NM_030877.3</a> | NAP;P14L;C20orf33;FLJ21108;NYD-SP19 | DNA         | nucleus     | regulation   |
| GI_29570787-A | 192     | 222.9  | 198.3  | CRP2BP   | <a href="#">NM_177926.1</a> | CRP2BP;MGC15388;dJ717M23.1          | N-          | nucleus     |              |
| GI_29570787-I | 84.1    | 89.1   | 86.3   | CRP2BP   | <a href="#">NM_177926.1</a> | CRP2BP;MGC15388;dJ717M23.1          | N-          | nucleus     |              |
| GI_29570789-I | 761.7   | 578.6  | 377.3  | CRP2BP   | <a href="#">NM_020536.2</a> | CRP2BP;MGC15388;dJ717M23.1          | N-          | nucleus     |              |
| GI_29570790-I | 106.6   | 102    | 80.4   | CSNK2A1  | <a href="#">NM_177559.1</a> | CKII;CK2A1                          | protein     | plasma      | protein      |
| GI_29570792-A | 1508.5  | 1333.7 | 664    | CSNK2A1  | <a href="#">NM_177560.1</a> | CKII;CK2A1                          | protein     | plasma      | protein      |
| GI_29570796-S | 206.7   | 347.9  | 295.1  | PPARGC1A | <a href="#">NM_013261.2</a> | LEM6;PGC1;PGC1A;PPARGC1;PGC-        | DNA         | nucleus     | signal       |
| GI_29570797-S | 1046.2  | 820.1  | 804.6  | PPAT     | <a href="#">NM_002703.3</a> | GPAT;ATASE                          | amidopho    |             | purine       |
| GI_29570799-I | 92.7    | 96.9   | 86.3   | CDH26    | <a href="#">NM_177980.1</a> | VR20                                |             |             |              |
| GI_29570801-A | 156.4   | 170.3  | 159.3  | CDH26    | <a href="#">NM_021810.3</a> | VR20                                |             |             |              |
| GI_29570801-I | 101.1   | 93.5   | 95.1   | CDH26    | <a href="#">NM_021810.3</a> | VR20                                |             |             |              |
| GI_29571103-S | 95.2    | 105.2  | 89.4   | KISS1    | <a href="#">NM_002256.2</a> | KiSS-1;MGC39258                     |             |             | cytoskelet   |
| GI_29571105-S | 102.7   | 117.7  | 107.6  | BMP8B    | <a href="#">NM_001720.2</a> | OP2;BMP8                            | cytokine    | extracellul | skeletal     |
| GI_29648312-S | 717.1   | 877.5  | 543.3  | LOC57168 | <a href="#">NM_020437.3</a> |                                     | peptide-    |             |              |
| GI_29648316-I | 259.5   | 270.2  | 227.5  | MT       | <a href="#">NM_173467.2</a> | MGC47838;bK1191B2.3                 |             |             |              |



|               |       |       |       |           |                             |                        |     |             |          |
|---------------|-------|-------|-------|-----------|-----------------------------|------------------------|-----|-------------|----------|
| GI_29648320-S | 640.2 | 583.4 | 462.2 | MGC29875  | <a href="#">NM_014388.2</a> | FLJ12704;DJ434O14.5    |     |             |          |
| GI_29725600-S | 106.1 | 99.4  | 106.7 | MIA2      | <a href="#">NM_054024.2</a> | FLJ22404               |     |             |          |
| GI_29725604-S | 164.2 | 216   | 304.9 | TSPYL4    | <a href="#">NM_021648.3</a> | KIAA0721;dJ486I3.2     | DNA | nucleus     | nucleoso |
| GI_29725606-I | 569.1 | 719.4 | 740.9 | SMAP-1    | <a href="#">NM_018671.2</a> | FLJ10043;IRO039700     |     |             |          |
| GI_29725621-S | 153.5 | 186.2 | 117.8 | TPCN1     | <a href="#">NM_017901.3</a> | TPC1;FLJ20612;KIAA1169 |     |             |          |
| GI_29725623-S | 133.7 | 143.9 | 145.7 | COL23A1   | <a href="#">NM_173465.2</a> | DKFZp434K0621          |     | microfibril |          |
| GI_29725634-S | 110.1 | 132.3 | 118.8 | OTOP1     | <a href="#">NM_177998.1</a> |                        |     |             |          |
| GI_29727530-S | 108   | 96    | 104.7 | LOC339398 | <a href="#">XM_291387.1</a> |                        |     |             |          |
| GI_29727545-S | 284.2 | 370.1 | 348.2 | LOC149018 | <a href="#">XM_086402.6</a> |                        |     |             |          |
| GI_29727605-S | 143   | 153.1 | 147.5 | LOC339951 | <a href="#">XM_293656.1</a> |                        |     |             |          |
| GI_29727809-S | 578.1 | 685.7 | 618.2 | LOC343069 | <a href="#">XM_291395.1</a> |                        |     |             |          |
| GI_29727991-S | 131.8 | 150.5 | 122.7 | LOC344620 | <a href="#">XM_293514.1</a> |                        |     |             |          |
| GI_29728071-S | 580.9 | 466.6 | 472.7 | KIAA0882  | <a href="#">XM_093895.6</a> |                        |     |             |          |
| GI_29728376-S | 151.1 | 187   | 169.8 | LOC345079 | <a href="#">XM_293687.1</a> |                        |     |             |          |
| GI_29728513-S | 104.5 | 166   | 117.3 | HES2      | <a href="#">XM_290879.1</a> |                        |     |             |          |
| GI_29728546-S | 249.7 | 327.8 | 231.5 | KIAA0551  | <a href="#">XM_039796.9</a> |                        |     |             |          |
| GI_29728788-S | 82.2  | 95.7  | 84.1  | LOC343153 | <a href="#">XM_291428.1</a> |                        |     |             |          |
| GI_29728998-S | 168   | 178.7 | 165.7 | LOC343170 | <a href="#">XM_291436.1</a> |                        |     |             |          |
| GI_29729000-S | 130.2 | 141.2 | 126.5 | OR1C1     | <a href="#">XM_291437.1</a> |                        |     |             |          |
| GI_29729002-S | 348.1 | 430.6 | 388.2 | LOC343171 | <a href="#">XM_291438.1</a> |                        |     |             |          |
| GI_29729004-S | 111.8 | 121.1 | 104.6 | LOC343172 | <a href="#">XM_291439.1</a> |                        |     |             |          |
| GI_29729015-S | 138.1 | 148.4 | 156.5 | LOC285047 | <a href="#">XM_211749.2</a> |                        |     |             |          |
| GI_29729032-S | 134.9 | 146.6 | 133.1 | LOC132946 | <a href="#">XM_059617.4</a> |                        |     |             |          |
| GI_29729340-S | 144.3 | 141.3 | 133.9 | LOC339744 | <a href="#">XM_290994.1</a> |                        |     |             |          |
| GI_29729487-S | 96.3  | 99    | 89.6  | LOC339875 | <a href="#">XM_295091.1</a> |                        |     |             |          |
| GI_29729553-S | 173.2 | 213   | 194.6 | KIAA0232  | <a href="#">XM_291106.1</a> |                        |     |             |          |
| GI_29729561-S | 278.6 | 242.1 | 224.4 | MGC21874  | <a href="#">XM_291105.1</a> |                        |     |             |          |
| GI_29729665-S | 811.3 | 742.5 | 547.3 | KIAA1268  | <a href="#">XM_291055.1</a> |                        |     |             |          |
| GI_29730038-S | 126.5 | 129.9 | 124.2 | LOC127003 | <a href="#">XM_059104.4</a> |                        |     |             |          |
| GI_29730062-S | 107   | 96.8  | 94.5  | LOC256283 | <a href="#">XM_173105.2</a> |                        |     |             |          |
| GI_29730133-S | 110.3 | 121.4 | 109.7 | LOC339771 | <a href="#">XM_295059.1</a> |                        |     |             |          |
| GI_29730274-S | 136.4 | 135.4 | 130.1 | LOC131055 | <a href="#">XM_067176.7</a> |                        |     |             |          |
| GI_29730298-S | 108.5 | 113.1 | 111.9 | TAS1R3    | <a href="#">XM_290905.1</a> |                        |     |             |          |
| GI_29730466-S | 142   | 154   | 147.9 | LOC339997 | <a href="#">XM_295126.1</a> |                        |     |             |          |
| GI_29730519-S | 99.1  | 112.9 | 106.6 | LOC152519 | <a href="#">XM_087483.3</a> |                        |     |             |          |
| GI_29730668-S | 76.7  | 87.2  | 77    | LOC339902 | <a href="#">XM_295097.1</a> |                        |     |             |          |
| GI_29731086-S | 103   | 111.2 | 99.7  | LOC339782 | <a href="#">XM_295062.1</a> |                        |     |             |          |
| GI_29731277-S | 338.3 | 446   | 360.4 | LOC151261 | <a href="#">XM_098030.2</a> |                        |     |             |          |
| GI_29731394-S | 134.1 | 147.4 | 130.3 | MGC27277  | <a href="#">XM_290922.1</a> |                        |     |             |          |
| GI_29731560-S | 295.6 | 743.4 | 427.5 | FLJ33674  | <a href="#">XM_291074.1</a> |                        |     |             |          |
| GI_29731718-S | 86.3  | 114.5 | 89.7  | LOC339793 | <a href="#">XM_291017.1</a> |                        |     |             |          |
| GI_29731736-S | 933.4 | 857.9 | 727.1 | KIAA1841  | <a href="#">XM_087056.4</a> |                        |     |             |          |
| GI_29731856-S | 102.6 | 98.9  | 111.3 | LOC344423 | <a href="#">XM_293042.1</a> |                        |     |             |          |
| GI_29731922-S | 185.6 | 194.6 | 207.9 | FLJ12643  | <a href="#">XM_095991.6</a> |                        |     |             |          |

|               |       |       |       |           |                             |
|---------------|-------|-------|-------|-----------|-----------------------------|
| GI_29731964-S | 491.5 | 392.4 | 307.7 | KIAA0804  | <a href="#">XM_291080.1</a> |
| GI_29731972-S | 96.6  | 95.1  | 107.9 | LOC339926 | <a href="#">XM_291075.1</a> |
| GI_29732251-S | 91.5  | 103.8 | 98.6  | LOC339809 | <a href="#">XM_291020.1</a> |
| GI_29732263-S | 319.8 | 333.3 | 472.9 | LOC91373  | <a href="#">XM_038063.8</a> |
| GI_29732373-S | 117.8 | 120.9 | 97    | MGC43306  | <a href="#">XM_291304.1</a> |
| GI_29732565-S | 131.5 | 175.6 | 132.8 | CDGAP     | <a href="#">XM_291085.1</a> |
| GI_29732583-S | 165.9 | 176.7 | 160.4 | LOC285095 | <a href="#">XM_211764.2</a> |
| GI_29732623-S | 94.3  | 85.7  | 83.9  | LOC340477 | <a href="#">XM_295257.1</a> |
| GI_29732655-S | 147   | 143.8 | 139.5 | LOC347169 | <a href="#">XM_294534.1</a> |
| GI_29732833-S | 125.4 | 119.9 | 129.2 | MGC35030  | <a href="#">XM_290936.1</a> |
| GI_29733221-S | 113.3 | 119.1 | 119.6 | DMRTA1    | <a href="#">XM_291311.1</a> |
| GI_29733241-S | 170.5 | 190.4 | 179   | LOC138724 | <a href="#">XM_059997.3</a> |
| GI_29733255-S | 124.4 | 123.6 | 111.5 | FBXO10    | <a href="#">XM_291314.1</a> |
| GI_29733263-S | 114.3 | 97.1  | 97.3  | LOC126661 | <a href="#">XM_059061.3</a> |
| GI_29733317-S | 144.4 | 150.9 | 152.8 | LOC343521 | <a href="#">XM_291623.1</a> |
| GI_29733581-S | 287.6 | 300.8 | 254.5 | KIAA1332  | <a href="#">XM_048774.4</a> |
| GI_29733770-S | 84    | 83.6  | 73.5  | LOC340246 | <a href="#">XM_291208.1</a> |
| GI_29733991-S | 94.4  | 80.8  | 86.4  | LOC340511 | <a href="#">XM_295261.1</a> |
| GI_29733995-S | 155.4 | 180.2 | 169.8 | LOC138805 | <a href="#">XM_071099.5</a> |
| GI_29734032-S | 104.1 | 148.1 | 117.7 | LOC347265 | <a href="#">XM_294590.1</a> |
| GI_29734048-S | 131.5 | 116.4 | 109.4 | LOC347273 | <a href="#">XM_294592.1</a> |
| GI_29734290-S | 90    | 98.1  | 94.4  | LOC286094 | <a href="#">XM_212170.2</a> |
| GI_29734344-S | 136.6 | 169.9 | 135.5 | LOC90987  | <a href="#">XM_291262.1</a> |
| GI_29734346-S | 110.4 | 115.9 | 98.1  | LOC340385 | <a href="#">XM_291261.1</a> |
| GI_29734357-S | 126   | 145.5 | 141.4 | LOC133874 | <a href="#">XM_059672.4</a> |
| GI_29734567-S | 171.9 | 214.3 | 180.2 | LOC340393 | <a href="#">XM_291270.1</a> |
| GI_29734945-S | 110.3 | 120.2 | 112.3 | LOC340286 | <a href="#">XM_295200.1</a> |
| GI_29735169-S | 352.8 | 422.7 | 405.7 | LOC255187 | <a href="#">XM_173160.2</a> |
| GI_29735241-S | 178   | 215.6 | 202.9 | LOC345537 | <a href="#">XM_293868.1</a> |
| GI_29735560-S | 143   | 165.7 | 137.9 | LOC346517 | <a href="#">XM_294310.1</a> |
| GI_29735634-S | 103.7 | 98    | 99.3  | LOC153778 | <a href="#">XM_087762.2</a> |
| GI_29735784-S | 187.6 | 142.8 | 158.8 | LOC90673  | <a href="#">XM_033391.8</a> |
| GI_29735852-S | 107.3 | 115   | 113.8 | TTC6      | <a href="#">XM_056434.2</a> |
| GI_29735919-S | 85.4  | 87.8  | 77.2  | LOC346974 | <a href="#">XM_294476.1</a> |
| GI_29736037-S | 170.3 | 174.9 | 179   | LOC338914 | <a href="#">XM_290609.1</a> |
| GI_29736042-S | 112.9 | 139.6 | 115.1 | LOC338916 | <a href="#">XM_294737.1</a> |
| GI_29736049-S | 132.8 | 130.3 | 131.9 | LOC338918 | <a href="#">XM_294743.1</a> |
| GI_29736110-S | 138.4 | 143.5 | 171.6 | C14orf72  | <a href="#">XM_096733.2</a> |
| GI_29736121-S | 87.5  | 95.4  | 100.4 | LOC338934 | <a href="#">XM_290626.1</a> |
| GI_29736547-S | 104.5 | 115.2 | 101.7 | LOC153630 | <a href="#">XM_098406.5</a> |
| GI_29736621-S | 119.7 | 142.4 | 144   | LOC345651 | <a href="#">XM_293924.1</a> |
| GI_29736784-S | 152.1 | 124.9 | 118.2 | LOC201294 | <a href="#">XM_113950.4</a> |
| GI_29736832-S | 90.9  | 93.5  | 99.5  | LOC283999 | <a href="#">XM_211287.2</a> |
| GI_29736979-S | 77.2  | 94.4  | 85.7  | LOC255275 | <a href="#">XM_171855.3</a> |

|               |        |        |        |           |                             |
|---------------|--------|--------|--------|-----------|-----------------------------|
| GI_29737062-S | 128.8  | 147.5  | 155.4  | LOC340344 | <a href="#">XM_294353.1</a> |
| GI_29737065-S | 90.9   | 92.7   | 85.6   | LOC154872 | <a href="#">XM_098625.2</a> |
| GI_29737091-S | 106.9  | 108    | 76.4   | LOC340349 | <a href="#">XM_295205.1</a> |
| GI_29737421-S | 268.2  | 256.8  | 254.3  | KIAA1936  | <a href="#">XM_056082.6</a> |
| GI_29738271-S | 97.9   | 83.4   | 90.6   | LOC144762 | <a href="#">XM_096676.2</a> |
| GI_29738554-S | 114.3  | 115.9  | 119.5  | LOC339204 | <a href="#">XM_292621.1</a> |
| GI_29738586-S | 142.8  | 166.3  | 176.6  | LOC339209 | <a href="#">XM_294854.1</a> |
| GI_29739145-S | 153.1  | 161.4  | 156.7  | LOC339230 | <a href="#">XM_290771.1</a> |
| GI_29739147-S | 349.1  | 360    | 309.9  | LOC339231 | <a href="#">XM_290777.1</a> |
| GI_29739184-S | 140.5  | 155    | 152.3  | LOC340149 | <a href="#">XM_295169.1</a> |
| GI_29739190-S | 111.8  | 114.1  | 105.2  | LOC153918 | <a href="#">XM_087800.2</a> |
| GI_29739316-S | 91     | 89.2   | 103.9  | LOC340765 | <a href="#">XM_291704.1</a> |
| GI_29739479-S | 96.2   | 101    | 84.7   | LOC339243 | <a href="#">XM_290782.1</a> |
| GI_29739598-S | 112.5  | 137.2  | 119.8  | LOC118670 | <a href="#">XM_058332.3</a> |
| GI_29739848-S | 221.2  | 287    | 251.1  | LOC339281 | <a href="#">XM_294894.1</a> |
| GI_29740201-S | 2017.3 | 1841.3 | 1825.5 | FLJ14502  | <a href="#">XM_031561.6</a> |
| GI_29740202-S | 189.7  | 199.5  | 180.5  | MAPKBP1   | <a href="#">XM_031706.7</a> |
| GI_29740221-S | 285.2  | 453.6  | 430.4  | FLJ10980  | <a href="#">XM_035527.8</a> |
| GI_29740242-S | 771.4  | 621.2  | 578.3  | LOC145853 | <a href="#">XM_096885.6</a> |
| GI_29740251-S | 94     | 107.3  | 85.5   | LOC338949 | <a href="#">XM_294751.1</a> |
| GI_29740257-S | 152.5  | 171.4  | 157.9  | LOC338951 | <a href="#">XM_294750.1</a> |
| GI_29740609-S | 108.6  | 115.3  | 117.7  | LOC338611 | <a href="#">XM_291745.1</a> |
| GI_29740697-S | 82.5   | 81.8   | 92     | LOC340168 | <a href="#">XM_291161.1</a> |
| GI_29740706-S | 108.8  | 101.9  | 88     | LOC340171 | <a href="#">XM_295178.1</a> |
| GI_29740938-S | 291.5  | 259.9  | 196    | KIAA1136  | <a href="#">XM_166110.3</a> |
| GI_29740943-S | 114.6  | 91.6   | 97.3   | LOC338616 | <a href="#">XM_294666.1</a> |
| GI_29740945-S | 94.4   | 100.4  | 91.7   | LOC338617 | <a href="#">XM_291771.1</a> |
| GI_29741064-S | 206.2  | 237.4  | 215.6  | NUT       | <a href="#">XM_171724.3</a> |
| GI_29741265-S | 194.6  | 201.4  | 220.3  | LOC339321 | <a href="#">XM_290831.1</a> |
| GI_29741281-S | 134.3  | 152    | 149.5  | LOC147975 | <a href="#">XM_097351.2</a> |
| GI_29741414-S | 625.4  | 839.7  | 777.9  | LOC339344 | <a href="#">XM_290848.1</a> |
| GI_29741436-S | 279.3  | 356.5  | 314.3  | LOC147646 | <a href="#">XM_085833.3</a> |
| GI_29741437-S | 522.4  | 521.7  | 572.7  | LOC339352 | <a href="#">XM_294910.1</a> |
| GI_29741463-S | 154.2  | 135.5  | 109.5  | LOC339358 | <a href="#">XM_294914.1</a> |
| GI_29741968-S | 105.2  | 100.5  | 84     | LOC338761 | <a href="#">XM_290558.1</a> |
| GI_29742308-S | 95.5   | 107.7  | 99.2   | LOC341356 | <a href="#">XM_292023.1</a> |
| GI_29742395-S | 147.2  | 172.7  | 121    | LOC340204 | <a href="#">XM_291169.1</a> |
| GI_29742429-S | 110.5  | 130.1  | 111.8  | RGL3      | <a href="#">XM_290867.1</a> |
| GI_29742461-S | 116.3  | 116.5  | 113.9  | LOC340211 | <a href="#">XM_291181.1</a> |
| GI_29742513-S | 107.2  | 103.2  | 107.3  | LOC339375 | <a href="#">XM_294922.1</a> |
| GI_29742584-S | 116.6  | 130    | 151.2  | KIAA1586  | <a href="#">XM_166451.2</a> |
| GI_29742588-S | 105.4  | 119.2  | 105.8  | FLJ21438  | <a href="#">XM_029084.5</a> |
| GI_29742605-S | 217.5  | 261.6  | 223.1  | LOC339377 | <a href="#">XM_290866.1</a> |
| GI_29742698-S | 407.5  | 426.7  | 333.4  | MGC26694  | <a href="#">XM_209204.2</a> |

|               |        |        |        |           |                             |      |          |                        |
|---------------|--------|--------|--------|-----------|-----------------------------|------|----------|------------------------|
| GI_29742910-S | 128.7  | 136.3  | 111.1  | LOC342977 | <a href="#">XM_292819.1</a> |      |          |                        |
| GI_29743204-S | 100.4  | 113.9  | 102.3  | LOC338786 | <a href="#">XM_294713.1</a> |      |          |                        |
| GI_29743247-S | 84.8   | 80.1   | 87.7   | LOC341412 | <a href="#">XM_292046.1</a> |      |          |                        |
| GI_29743268-S | 458.1  | 587.6  | 567.1  | OATL1     | <a href="#">XM_047025.6</a> |      |          |                        |
| GI_29743323-S | 107    | 129.8  | 103.8  | LOC347348 | <a href="#">XM_293276.1</a> |      |          |                        |
| GI_29743450-S | 122    | 128.9  | 134.1  | LOC339306 | <a href="#">XM_294906.1</a> |      |          |                        |
| GI_29743461-S | 140.6  | 150    | 139.6  | LOC340527 | <a href="#">XM_291321.1</a> |      |          |                        |
| GI_29743488-S | 142.3  | 158.8  | 144.3  | LOC119679 | <a href="#">XM_061611.2</a> |      |          |                        |
| GI_29743494-S | 114    | 146.8  | 129.7  | LOC119678 | <a href="#">XM_061610.2</a> |      |          |                        |
| GI_29743512-S | 388.5  | 420.6  | 361.3  | NXP4      | <a href="#">XM_290582.1</a> | NPH4 | receptor | extracellul neuropepti |
| GI_29743632-S | 20060  | 19077  | 13880  | LOC342808 | <a href="#">XM_292700.1</a> |      |          |                        |
| GI_29743707-S | 109.2  | 88.7   | 102.1  | KIAA2022  | <a href="#">XM_291326.1</a> |      |          |                        |
| GI_29743718-S | 105.9  | 123.9  | 116.9  | LOC347359 | <a href="#">XM_293293.1</a> |      |          |                        |
| GI_29743757-S | 119.6  | 133.3  | 116.7  | LOC139793 | <a href="#">XM_060054.3</a> |      |          |                        |
| GI_29743852-S | 1614.7 | 1173.3 | 1155.8 | PRMT3     | <a href="#">XM_058460.3</a> |      | N-       | cytoplasm N-terminal   |
| GI_29743984-S | 111.4  | 115.4  | 117.5  | FLJ34907  | <a href="#">XM_290817.1</a> |      |          |                        |
| GI_29744067-S | 115.3  | 105    | 98     | LOC283420 | <a href="#">XM_208667.2</a> |      |          |                        |
| GI_29744077-S | 225.8  | 231.3  | 230.2  | LOC340542 | <a href="#">XM_291335.1</a> |      |          |                        |
| GI_29744085-S | 87     | 91.4   | 85.2   | LOC340543 | <a href="#">XM_291334.1</a> |      |          |                        |
| GI_29744101-S | 113.6  | 121    | 104    | LOC341461 | <a href="#">XM_292098.1</a> |      |          |                        |
| GI_29744194-S | 113.5  | 133    | 120.8  | LOC343565 | <a href="#">XM_293097.1</a> |      |          |                        |
| GI_29744221-S | 124.1  | 111.6  | 117.5  | LOC340549 | <a href="#">XM_293332.1</a> |      |          |                        |
| GI_29744307-S | 116.9  | 126.2  | 120.7  | LOC143941 | <a href="#">XM_084672.2</a> |      |          |                        |
| GI_29744326-S | 98.7   | 92.7   | 86.9   | LOC338661 | <a href="#">XM_290501.1</a> |      |          |                        |
| GI_29744339-S | 94.1   | 93.5   | 88.8   | LOC338666 | <a href="#">XM_294677.1</a> |      |          |                        |
| GI_29744347-S | 125.1  | 107.1  | 112.3  | LOC338825 | <a href="#">XM_294723.1</a> |      |          |                        |
| GI_29744361-S | 190.2  | 210.3  | 204.8  | KIAA1030  | <a href="#">XM_290502.1</a> |      |          |                        |
| GI_29744402-S | 182    | 171.4  | 176.3  | LOC347423 | <a href="#">XM_293341.1</a> |      |          |                        |
| GI_29744569-S | 141.2  | 153.6  | 151.4  | LOC341511 | <a href="#">XM_292109.1</a> |      |          |                        |
| GI_29744602-S | 114.6  | 127    | 130.7  | KIAA1755  | <a href="#">XM_028810.4</a> |      |          |                        |
| GI_29744642-S | 126.9  | 130.6  | 132    | LOC149738 | <a href="#">XM_097725.2</a> |      |          |                        |
| GI_29744653-S | 110.1  | 122    | 106.6  | LOC339583 | <a href="#">XM_295007.1</a> |      |          |                        |
| GI_29745032-S | 139.8  | 174.4  | 151.7  | LOC338694 | <a href="#">XM_294680.1</a> |      |          |                        |
| GI_29745113-S | 174.1  | 227.9  | 180    | DDN       | <a href="#">XM_290598.1</a> |      |          |                        |
| GI_29745308-S | 158.1  | 189.6  | 174.7  | USP35     | <a href="#">XM_290527.1</a> |      |          |                        |
| GI_29745421-S | 103    | 124.3  | 100.5  | LOC341168 | <a href="#">XM_291897.1</a> |      |          |                        |
| GI_29745452-S | 90.8   | 96.5   | 86.8   | LOC340581 | <a href="#">XM_295270.1</a> |      |          |                        |
| GI_29745490-S | 194.1  | 236.4  | 211.1  | LOC347454 | <a href="#">XM_293380.1</a> |      |          |                        |
| GI_29745634-S | 126.8  | 141.6  | 122.8  | LOC343705 | <a href="#">XM_293157.1</a> |      |          |                        |
| GI_29745744-S | 84.8   | 104    | 85.8   | C21orf54  | <a href="#">XM_295017.1</a> |      |          |                        |
| GI_29745755-S | 329.5  | 231    | 185.3  | LOC150084 | <a href="#">XM_086761.3</a> |      |          |                        |
| GI_29745945-S | 122.1  | 138.5  | 132.9  | KIAA0316  | <a href="#">XM_045712.5</a> |      |          |                        |
| GI_29745993-S | 855.6  | 2290.7 | 1218.9 | KIAA0830  | <a href="#">XM_290546.1</a> |      |          |                        |
| GI_29746068-S | 333.7  | 431.6  | 389.9  | LOC347512 | <a href="#">XM_293396.1</a> |      |          |                        |

|               |        |        |        |            |                             |                                |              |                       |
|---------------|--------|--------|--------|------------|-----------------------------|--------------------------------|--------------|-----------------------|
| GI_29746157-S | 102.4  | 122.7  | 115.1  | LOC338734  | <a href="#">XM_290547.1</a> |                                |              |                       |
| GI_29746244-S | 168.5  | 205    | 185.3  | LOC340595  | <a href="#">XM_293405.1</a> |                                |              |                       |
| GI_29746315-S | 120.3  | 135.5  | 144.8  | LOC158957  | <a href="#">XM_088726.2</a> |                                |              |                       |
| GI_29746497-S | 251    | 285.3  | 285.7  | LOC338749  | <a href="#">XM_294692.1</a> |                                |              |                       |
| GI_29746573-S | 93     | 111.3  | 102.8  | LOC196335  | <a href="#">XM_115092.2</a> |                                |              |                       |
| GI_29746633-S | 894.2  | 770.2  | 896.3  | LOC339665  | <a href="#">XM_290973.1</a> |                                |              |                       |
| GI_29746781-S | 1014.1 | 1025.3 | 996.4  | KIAA0350   | <a href="#">XM_290667.1</a> |                                |              |                       |
| GI_29747011-S | 97     | 110.1  | 85.4   | DKFZP434I2 | <a href="#">XM_290684.1</a> |                                |              |                       |
| GI_29747019-S | 285.1  | 338.5  | 300.8  | LOC339065  | <a href="#">XM_294794.1</a> |                                |              |                       |
| GI_29747038-S | 89.4   | 89.3   | 79.8   | TNRC9      | <a href="#">XM_049037.7</a> |                                |              |                       |
| GI_29747214-S | 104.9  | 128.8  | 103.9  | LOC342355  | <a href="#">XM_292503.1</a> |                                |              |                       |
| GI_29747247-S | 92.9   | 99     | 92.5   | LOC342371  | <a href="#">XM_292512.1</a> |                                |              |                       |
| GI_29747360-S | 1190   | 2006.5 | 1650.8 | LOC342405  | <a href="#">XM_292526.1</a> |                                |              |                       |
| GI_29747408-S | 500.9  | 616.3  | 545    | MGC46336   | <a href="#">XM_290712.1</a> |                                |              |                       |
| GI_29747582-S | 108.4  | 121.7  | 107.1  | HYDIN      | <a href="#">XM_030075.5</a> |                                |              |                       |
| GI_29747594-S | 218.7  | 252    | 206.8  | LOC283953  | <a href="#">XM_208930.2</a> |                                |              |                       |
| GI_29788754-S | 98.8   | 100.9  | 92     | CMT4B2     | <a href="#">NM_030962.1</a> | SBF2;MTMR13;KIAA1766           |              |                       |
| GI_29788761-S | 103    | 109.1  | 99.8   | DNTT       | <a href="#">NM_004088.2</a> | TDT                            | DNA          | nucleus DNA           |
| GI_29788765-S | 102.7  | 83.4   | 90     | TUBB4Q     | <a href="#">NM_020040.2</a> |                                | structural   | cytoskelet microtubul |
| GI_29788771-S | 132.9  | 140.4  | 132.3  | TNRC4      | <a href="#">NM_007185.2</a> | CAGH4;CELF3;ERDA4;BRUNOL1      | transcripti  | neurogene             |
| GI_29788775-S | 121.1  | 119.8  | 111.5  | XTP7       | <a href="#">NM_138568.2</a> | MGC16332                       |              |                       |
| GI_29788777-A | 84.5   | 88.1   | 77.3   | PRIMA1     | <a href="#">NM_178013.1</a> | PRIMA                          |              | integral to neurotran |
| GI_29788782-I | 107.8  | 109.8  | 97.5   | PRIMA1     | <a href="#">NM_178004.1</a> | PRIMA                          |              | integral to neurotran |
| GI_29788788-S | 168.1  | 201.2  | 233.3  | DCOHM      | <a href="#">NM_032151.2</a> | DKFZp566K1946                  |              |                       |
| GI_29788789-S | 146.1  | 140.1  | 130.2  | HMG2L1     | <a href="#">NM_005487.2</a> | THC211630                      | DNA          | nucleus endosome      |
| GI_29788984-A | 189.4  | 225.7  | 219.8  | SLC24A4    | <a href="#">NM_153647.1</a> | NCKX4                          | symporter    | integral to sodium    |
| GI_29788986-I | 439.6  | 538    | 507.2  | SLC24A4    | <a href="#">NM_153648.1</a> | NCKX4                          | symporter    | integral to sodium    |
| GI_29788995-S | 120.2  | 122.4  | 138.2  | PON3       | <a href="#">NM_000940.1</a> |                                | arylesterase | extracellul response  |
| GI_29788999-S | 711.5  | 699.2  | 512.2  | SUCLG2     | <a href="#">NM_003848.1</a> | G-BETA                         |              |                       |
| GI_29789001-S | 225.6  | 231.8  | 278.6  | EVI1       | <a href="#">NM_005241.1</a> | PRDM3;MDS1-EVI1                | JUN          | nucleus JNK           |
| GI_29789005-S | 3675.4 | 2678.8 | 2263.4 | PLEKHC1    | <a href="#">NM_006832.1</a> | MIG2;KIND2;mig-2;UNC112        | cell         | cytoskelet regulation |
| GI_29789007-S | 135.7  | 172.3  | 156    | HYPC       | <a href="#">NM_012272.1</a> |                                | protein      | mRNA                  |
| GI_29789053-S | 437.6  | 595.1  | 484.4  | FCHO1      | <a href="#">NM_015122.1</a> | KIAA0290                       | transferase  | metabolis             |
| GI_29789055-A | 185.3  | 194.4  | 179.9  | TRIF       | <a href="#">NM_014261.1</a> | TICAM1;PRVTIRB;MGC35334        | transmem     | membran               |
| GI_29789057-S | 792.3  | 431.2  | 417.2  | KIBRA      | <a href="#">NM_015238.1</a> | KIAA0869                       |              |                       |
| GI_29789059-S | 982.8  | 661.8  | 733.2  | KIAA0528   | <a href="#">NM_014802.1</a> |                                | transporte   | membran transport     |
| GI_29789063-S | 218.1  | 233.4  | 207.1  | SULF1      | <a href="#">NM_015170.1</a> | SULF-1;HSULF-1;KIAA1077        | sulfuric     | Golgi metabolis       |
| GI_29789067-S | 137.4  | 173.5  | 154.4  | CLONE25003 | <a href="#">NM_015381.1</a> | UNQ5208;QLLK5208;ba262A13.1    |              |                       |
| GI_29789077-S | 89.1   | 101    | 98.6   | UGT1A10    | <a href="#">NM_019075.1</a> | UGT1J                          | UDP-         |                       |
| GI_29789087-S | 501.6  | 550    | 512.4  | CCAR1      | <a href="#">NM_018237.1</a> | CARP1;CARP-1;FLJ10590;FLJ10839 | DNA          | nucleus               |
| GI_29789089-S | 2376.7 | 2738.3 | 2288.5 | TD-60      | <a href="#">NM_018715.1</a> | KIAA1470;DKFZp762N0610         | DNA          | nucleus regulation    |
| GI_29789101-S | 118.7  | 132.8  | 151.9  | NGEF       | <a href="#">NM_019850.1</a> | EPHEXIN                        |              |                       |
| GI_29789109-S | 295.9  | 537.7  | 439.9  | KIAA1145   | <a href="#">NM_020698.1</a> |                                |              | integral to           |
| GI_29789111-S | 237.9  | 253.8  | 208.8  | ZNF490     | <a href="#">NM_020714.1</a> | KIAA1198                       | DNA          | nucleus regulation    |

|               |        |        |        |          |                             |                                     |             |             |             |
|---------------|--------|--------|--------|----------|-----------------------------|-------------------------------------|-------------|-------------|-------------|
| GI_29789113-S | 956.4  | 892.8  | 804    | TBC1D14  | <a href="#">NM_020773.1</a> | KIAA1322                            |             |             |             |
| GI_29789117-S | 99.1   | 106    | 101.2  | KIAA1443 | <a href="#">NM_020834.1</a> | HOMEZ                               | transcripti | nucleus     | regulation  |
| GI_29789119-S | 106.2  | 111.2  | 108.6  | PRKWINK3 | <a href="#">NM_020922.1</a> | WNK3;KIAA1566                       | ATP         |             | protein     |
| GI_29789121-S | 242.4  | 208.8  | 231    | CRY2     | <a href="#">NM_021117.1</a> | HCRY2;PHLL2;KIAA0658                | G-protein   |             | circadian   |
| GI_29789254-A | 2172.8 | 2320.9 | 2585.2 | CMIP     | <a href="#">NM_030629.1</a> | KIAA1694                            |             |             |             |
| GI_29789254-I | 109    | 109.6  | 105.5  | CMIP     | <a href="#">NM_030629.1</a> | KIAA1694                            |             |             |             |
| GI_29789276-S | 94.5   | 112.3  | 94.5   | GPR123   | <a href="#">NM_032422.1</a> | KIAA1828                            | G-protein   | membran     |             |
| GI_29789280-S | 128.4  | 144.2  | 132.7  | KIAA1750 | <a href="#">NM_033512.1</a> |                                     | DNA         | nucleus     | nucleoso    |
| GI_29789282-S | 2144.4 | 1643.2 | 1408.4 | FLJ12519 | <a href="#">NM_032168.1</a> |                                     | electron    |             | electron    |
| GI_29789284-S | 4356.2 | 3721.9 | 5015.8 | COMMD7   | <a href="#">NM_053041.1</a> | C20orf92;FLJ14987;dJ1085F17.3       |             |             |             |
| GI_29789286-S | 802.2  | 798.7  | 701.5  | KIAA1754 | <a href="#">NM_033397.1</a> | ba127L20.2                          |             |             |             |
| GI_29789292-S | 263.8  | 280.3  | 298.9  | LIP8     | <a href="#">NM_053051.1</a> |                                     |             |             |             |
| GI_29789366-S | 254.3  | 266.8  | 214.5  | FOXP4    | <a href="#">NM_138457.1</a> |                                     |             |             |             |
| GI_29789372-S | 150.9  | 210.2  | 145.9  | LOC92689 | <a href="#">NM_138389.1</a> |                                     |             |             |             |
| GI_29789400-S | 651.7  | 692.7  | 568.3  | LOC92912 | <a href="#">NM_173469.1</a> |                                     |             |             |             |
| GI_29789450-S | 102.3  | 100.5  | 93.2   | CATSPER3 | <a href="#">NM_178019.1</a> | CACRC                               | cation      | membran     | cation      |
| GI_29824429-A | 115.2  | 103.8  | 107    | TMPRSS6  | <a href="#">NM_153019.2</a> | FLJ30744                            | trypsin     | integral to | proteolysis |
| GI_29824429-I | 122.2  | 143.3  | 115    | TMPRSS6  | <a href="#">NM_153019.2</a> | FLJ30744                            | trypsin     | integral to | proteolysis |
| GI_29825822-S | 275.7  | 315.8  | 294.7  | C17orf28 | <a href="#">NM_030630.1</a> | DMC1                                |             |             |             |
| GI_29826278-A | 246.7  | 239.9  | 149.6  | TUB      | <a href="#">NM_177972.1</a> |                                     |             | cytoplasm   |             |
| GI_29826278-I | 134.8  | 157.6  | 143.3  | TUB      | <a href="#">NM_177972.1</a> |                                     |             | cytoplasm   |             |
| GI_29826280-I | 121.1  | 124.4  | 111.6  | TUB      | <a href="#">NM_003320.3</a> |                                     |             | cytoplasm   |             |
| GI_29826281-I | 188.2  | 203.4  | 188    | PPM1G    | <a href="#">NM_177983.1</a> | PP2CG;PPP2CG;MGC1675;MGC2870;PP2C   | protein     | protein     | cell cycle  |
| GI_29826283-A | 6408.5 | 6924   | 6993.5 | PPM1G    | <a href="#">NM_002707.3</a> | PP2CG;PPP2CG;MGC1675;MGC2870;PP2C   | protein     | protein     | cell cycle  |
| GI_29826284-A | 3386.5 | 3599.2 | 2848.2 | MRPL47   | <a href="#">NM_177988.1</a> | NCM1;CGI-204;MGC45403               | structural  | mitochond   |             |
| GI_29826286-I | 152    | 174.5  | 149.1  | MRPL47   | <a href="#">NM_020409.2</a> | NCM1;CGI-204;MGC45403               | structural  | mitochond   |             |
| GI_29826288-I | 127.8  | 146.8  | 107.3  | H63      | <a href="#">NM_138423.2</a> |                                     |             |             |             |
| GI_29826290-A | 1140.3 | 1470.3 | 1237.5 | H63      | <a href="#">NM_177974.1</a> |                                     |             |             |             |
| GI_29826292-S | 526    | 541.3  | 515.1  | GORASP1  | <a href="#">NM_031899.2</a> | P65;GOLPH5;GRASP65;FLJ23443         |             |             |             |
| GI_29826293-S | 1741.8 | 1633.3 | 1098.4 | GORASP2  | <a href="#">NM_015530.3</a> | p59;GRS2;GOLPH6;GRASP55;FLJ13139;DK | protein     |             |             |
| GI_29826297-S | 188.5  | 186.3  | 200.6  | NDNL2    | <a href="#">NM_138704.2</a> | HCA4;MAGEG1                         |             |             |             |
| GI_29826298-A | 120    | 123    | 109    | ARL6     | <a href="#">NM_177976.1</a> | MGC32934                            | small       |             | small       |
| GI_29826298-I | 106.2  | 107.3  | 95.3   | ARL6     | <a href="#">NM_177976.1</a> | MGC32934                            | small       |             | small       |
| GI_29826300-I | 82.4   | 92.4   | 91.3   | ARL6     | <a href="#">NM_032146.3</a> | MGC32934                            | small       |             | small       |
| GI_29826313-S | 395.8  | 417.1  | 355.8  | DDA3     | <a href="#">NM_032636.4</a> | MGC1780                             |             |             |             |
| GI_29826314-I | 143.7  | 159    | 142.8  | DUSP15   | <a href="#">NM_080611.3</a> | ba243J16.6                          | protein     |             | protein     |
| GI_29826316-A | 108.2  | 108.2  | 85.8   | DUSP15   | <a href="#">NM_177991.1</a> | ba243J16.6                          | protein     |             | protein     |
| GI_29826316-I | 247.4  | 303.1  | 263.9  | DUSP15   | <a href="#">NM_177991.1</a> | ba243J16.6                          | protein     |             | protein     |
| GI_29826318-A | 2005.4 | 2036.4 | 2211.9 | ADD1     | <a href="#">NM_001119.3</a> | ADDA;MGC3339;MGC44427               | actin       | membran     |             |
| GI_29826326-S | 386.9  | 385.3  | 307.8  | GOLPH4   | <a href="#">NM_014498.2</a> | P138;GIMPC;GPP130                   |             | Golgi       |             |
| GI_29826327-S | 1046.6 | 1098   | 1134.8 | GPP34R   | <a href="#">NM_018178.3</a> | FLJ10687                            |             |             |             |
| GI_29826328-A | 105.1  | 101.4  | 90.8   | PAK7     | <a href="#">NM_177990.1</a> | PAK5;KIAA1264;MGC26232              | protein-    |             | protein     |
| GI_29826330-I | 122.5  | 124.2  | 115.7  | PAK7     | <a href="#">NM_020341.2</a> | PAK5;KIAA1264;MGC26232              | protein-    |             | protein     |
| GI_29826333-S | 963.8  | 814.7  | 1212.8 | PPM1F    | <a href="#">NM_014634.2</a> | FEM-2;POPX2;hFEM-                   |             |             |             |

|               |         |        |        |          |                             |                                       |             |             |             |
|---------------|---------|--------|--------|----------|-----------------------------|---------------------------------------|-------------|-------------|-------------|
| GI_29826334-S | 11535.9 | 10200  | 10356  | EIF2S2   | <a href="#">NM_003908.2</a> | EIF2;EIF2B;MGC8508;EIF2beta           | translation | ribosome    | protein     |
| GI_29826337-S | 117.5   | 449.9  | 164.4  | IFI30    | <a href="#">NM_006332.3</a> | GILT;IP30;IFI-30;MGC32056             | oxidoredu   | lysosome    | immune      |
| GI_29826338-S | 101.6   | 109.1  | 100.7  | SOX2     | <a href="#">NM_003106.2</a> | ANOP3;MGC2413                         | RNA         | nucleus     | transcripti |
| GI_29826339-S | 5104.6  | 5667.7 | 5989.5 | ATOX1    | <a href="#">NM_004045.2</a> | ATX1;HAH1                             | copper ion  |             | copper ion  |
| GI_29826340-S | 325.8   | 337.5  | 338.2  | CAMTA2   | <a href="#">NM_015099.2</a> | KIAA0909                              |             |             |             |
| GI_29837647-S | 132     | 145.2  | 128.8  | CYP4X1   | <a href="#">NM_178033.1</a> | MGC40051                              | monooxyg    |             | electron    |
| GI_29837653-A | 143.8   | 164.8  | 176.7  | C1orf9   | <a href="#">NM_014283.2</a> | CH1                                   |             |             |             |
| GI_29837653-I | 90.4    | 96.5   | 89.9   | C1orf9   | <a href="#">NM_014283.2</a> | CH1                                   |             |             |             |
| GI_29837656-S | 91.4    | 87.8   | 93.8   | FXC1     | <a href="#">NM_012192.2</a> | Tim9b;TIM10B;TIMM10B                  | protein     | mitochond   | cell-matrix |
| GI_29837661-S | 105     | 118.2  | 102.7  | PLA2G4D  | <a href="#">NM_178034.1</a> | cPLA2delta                            | phospholi   |             | phospholi   |
| GI_29893546-A | 164.2   | 151.6  | 145.6  | EPB41L4B | <a href="#">NM_018424.1</a> | CG1;EHM2;DKFZp761N1814                | structural  | cytoskelet  | cell shape  |
| GI_29893546-I | 136     | 128.8  | 111.1  | EPB41L4B | <a href="#">NM_018424.1</a> | CG1;EHM2;DKFZp761N1814                | structural  | cytoskelet  | cell shape  |
| GI_29893551-S | 366.7   | 283.7  | 330.8  | TRPM7    | <a href="#">NM_017672.2</a> | CHAK;CHAK1;LTRPC7;FLJ20117;TRP-PLIK   | cation      | integral to | cation      |
| GI_29893554-S | 102.4   | 107.7  | 95.8   | ANGPTL6  | <a href="#">NM_031917.2</a> | AGF;ARP5                              |             |             |             |
| GI_29893558-S | 127     | 148.9  | 129.9  | SCN1A    | <a href="#">NM_006920.2</a> | NAC1;SCN1;HBSCI;GEFSP2                | voltage-    | integral to | cation      |
| GI_29893560-S | 245.3   | 349.3  | 319.8  | SNN      | <a href="#">NM_003498.3</a> |                                       |             | integral to | response    |
| GI_29893561-S | 405.8   | 472    | 429    | C6orf210 | <a href="#">NM_020381.2</a> | bA59I9.3                              |             |             |             |
| GI_29893565-S | 203.8   | 224.6  | 229    | PSCA     | <a href="#">NM_005672.2</a> |                                       | tumor       | plasma      |             |
| GI_29893807-S | 123.8   | 155.6  | 124.6  | ARPM2    | <a href="#">NM_080431.3</a> | ARPT2;ACTRT2;HARPM2;FLJ25424          | structural  | actin       |             |
| GI_29893810-I | 112.7   | 145.8  | 111.8  | JPH2     | <a href="#">NM_020433.3</a> | JP2;JP-2;FLJ40969                     |             | integral to |             |
| GI_29893811-A | 107.8   | 101.9  | 92.2   | JPH2     | <a href="#">NM_175913.2</a> | JP2;JP-2;FLJ40969                     |             | integral to |             |
| GI_29893811-I | 131.6   | 155.1  | 145.8  | JPH2     | <a href="#">NM_175913.2</a> | JP2;JP-2;FLJ40969                     |             | integral to |             |
| GI_30017464-S | 2940.3  | 3421.7 | 1844.1 | SBP1     | <a href="#">NM_178121.1</a> |                                       |             |             |             |
| GI_30023850-S | 2096.2  | 2136.8 | 1838.6 | USP49    | <a href="#">NM_004275.2</a> | TRFP;PRO0213;DKFZp586D2223            | protein     |             | regulation  |
| GI_30023852-S | 109     | 113.9  | 96.1   | MTSS1    | <a href="#">NM_014751.2</a> | MIM;MIMA;MIMB;KIAA0429                | nucleic     | actin       | transmem    |
| GI_30025025-S | 1357.4  | 2066.4 | 1403.4 | OSTM1    | <a href="#">NM_014028.2</a> | GL;GIPN;HSPC019                       |             |             |             |
| GI_30026033-S | 1584.4  | 1955   | 2044.6 | SLC35B2  | <a href="#">NM_178148.1</a> | PAPST1;UGTrel4                        | copper ion  |             | electron    |
| GI_30039687-S | 83      | 78.9   | 86.2   | JCG6     | <a href="#">NM_178168.1</a> |                                       | olfactory   | integral to | olfaction   |
| GI_30039709-S | 103.6   | 105.9  | 107.2  | PTF1A    | <a href="#">NM_178161.1</a> | PTF1-p48                              |             |             |             |
| GI_30039713-S | 128.8   | 131.4  | 118.4  | OTOP2    | <a href="#">NM_178160.1</a> |                                       |             |             |             |
| GI_30061484-S | 199.3   | 218.8  | 213.1  | DEFB126  | <a href="#">NM_030931.2</a> | C20orf8;DEFB-26;ESP13.2;bA530N10.1    | protease    | extracellul | xenobiotic  |
| GI_30061486-S | 185.4   | 200.6  | 173.9  | DEFB127  | <a href="#">NM_139074.2</a> | DEF-27;DEFB-27;C20orf73;bA530N10.2    | antibacteri | cellular_co | xenobiotic  |
| GI_30061487-S | 195.1   | 211.3  | 208.8  | DEFB129  | <a href="#">NM_080831.2</a> | DEFB-29;C20orf87;bA530N10.3           |             |             | xenobiotic  |
| GI_30061488-I | 180.4   | 216.2  | 196.1  | EPB41L1  | <a href="#">NM_012156.2</a> | 4.1N;KIAA0338;MGC11072                | actin       | cytoskelet  |             |
| GI_30061490-A | 296.5   | 372.9  | 325.7  | EPB41L1  | <a href="#">NM_177996.1</a> | 4.1N;KIAA0338;MGC11072                | actin       | cytoskelet  |             |
| GI_30061490-I | 138.8   | 133.7  | 144.7  | EPB41L1  | <a href="#">NM_177996.1</a> | 4.1N;KIAA0338;MGC11072                | actin       | cytoskelet  |             |
| GI_30061493-A | 621.3   | 824.9  | 730.9  | HAP1     | <a href="#">NM_177977.1</a> | HLP;HAP2;HIP5;hHLP1                   |             | cytoskelet  | pathogene   |
| GI_30061495-I | 98.7    | 111.9  | 103.6  | HAP1     | <a href="#">NM_003949.2</a> | HLP;HAP2;HIP5;hHLP1                   |             | cytoskelet  | pathogene   |
| GI_30061497-A | 134.3   | 151.1  | 134.6  | GGTL3    | <a href="#">NM_178025.1</a> | GGTL5;D20S101;dJ18C9.2                | gamma-      | integral to | glutathion  |
| GI_30061497-I | 149.1   | 206.5  | 186.9  | GGTL3    | <a href="#">NM_178025.1</a> | GGTL5;D20S101;dJ18C9.2                | gamma-      | integral to | glutathion  |
| GI_30061499-I | 85.8    | 97.5   | 95.9   | GGTL3    | <a href="#">NM_178026.1</a> | GGTL5;D20S101;dJ18C9.2                | gamma-      | integral to | glutathion  |
| GI_30061503-I | 98.9    | 105    | 110.4  | GCNT2    | <a href="#">NM_145649.2</a> | II;IGNT;ULG3;AIGnT;BIGnT;CIGnT;GCNT5; | N-          | Golgi       | glycosami   |
| GI_30061504-I | 128.6   | 168.2  | 157.2  | GCNT2    | <a href="#">NM_001491.2</a> | II;IGNT;ULG3;AIGnT;BIGnT;CIGnT;GCNT5; | N-          | Golgi       | glycosami   |
| GI_30061505-A | 97.4    | 111.2  | 117.6  | GCNT2    | <a href="#">NM_145655.2</a> | II;IGNT;ULG3;AIGnT;BIGnT;CIGnT;GCNT5; | N-          | Golgi       | glycosami   |

|               |        |        |        |          |                             |                                       |             |             |             |
|---------------|--------|--------|--------|----------|-----------------------------|---------------------------------------|-------------|-------------|-------------|
| GI_30061505-I | 93.4   | 101.4  | 97.2   | GCNT2    | <a href="#">NM_145655.2</a> | II;IGNT;ULG3;AIGnT;BIGnT;CIGnT;GCNT5; | N-          | Golgi       | glycosami   |
| GI_30061506-I | 112.7  | 108.3  | 100.4  | PDZK3    | <a href="#">NM_178140.1</a> | AIPC;PIN1;PAPIN;PDZD2;KIAA0300        | ATP         |             | protein     |
| GI_30061508-A | 180.2  | 231.2  | 153.8  | PDZK3    | <a href="#">NM_015022.2</a> | AIPC;PIN1;PAPIN;PDZD2;KIAA0300        | ATP         |             | protein     |
| GI_30061555-S | 146.3  | 162.2  | 134.5  | SOX3     | <a href="#">NM_005634.2</a> | MRGH;SOXB                             | DNA         | nucleus     | central     |
| GI_30061557-A | 131    | 157.2  | 147.2  | SOX5     | <a href="#">NM_178010.1</a> | L-SOX5;MGC35153                       | transcripti | kinesin     | transcripti |
| GI_30061559-I | 138.2  | 139.6  | 106.3  | SOX5     | <a href="#">NM_006940.4</a> | L-SOX5;MGC35153                       | transcripti | kinesin     | transcripti |
| GI_30061560-I | 93.3   | 94.7   | 89.8   | SOX5     | <a href="#">NM_152989.2</a> | L-SOX5;MGC35153                       | transcripti | kinesin     | transcripti |
| GI_30061561-A | 98.5   | 103.8  | 98.4   | GABRB3   | <a href="#">NM_021912.2</a> | MGC9051                               | GABA-A      | integral to | small       |
| GI_30061561-I | 97.7   | 113.3  | 98.6   | GABRB3   | <a href="#">NM_021912.2</a> | MGC9051                               | GABA-A      | integral to | small       |
| GI_30061562-I | 180.8  | 216.5  | 196.8  | GABRB3   | <a href="#">NM_000814.3</a> | MGC9051                               | GABA-A      | integral to | small       |
| GI_30061563-S | 360.1  | 391.1  | 359.4  | GATA5    | <a href="#">NM_080473.3</a> | bB379O24.1                            | transcripti | nucleus     | regulation  |
| GI_30061564-A | 360.2  | 361.9  | 340.2  | FLJ10378 | <a href="#">NM_178043.1</a> | DKFZp434K245;DKFZp686E0316            |             |             |             |
| GI_30061564-I | 90.8   | 89.3   | 87.4   | FLJ10378 | <a href="#">NM_178043.1</a> | DKFZp434K245;DKFZp686E0316            |             |             |             |
| GI_30061566-I | 288.5  | 384.8  | 317.7  | FLJ10378 | <a href="#">NM_018078.2</a> | DKFZp434K245;DKFZp686E0316            |             |             |             |
| GI_30061568-I | 424    | 347.7  | 365    | FLJ10378 | <a href="#">NM_032239.2</a> | DKFZp434K245;DKFZp686E0316            |             |             |             |
| GI_30065641-I | 426.5  | 528.3  | 472    | PPP2R4   | <a href="#">NM_021131.3</a> | PP2A;PR53;PTPA;MGC2184                | protein     | soluble     | protein     |
| GI_30065644-I | 111    | 116.1  | 102.6  | PPP2R4   | <a href="#">NM_178001.1</a> | PP2A;PR53;PTPA;MGC2184                | protein     | soluble     | protein     |
| GI_30065648-A | 2836   | 3290.2 | 3717.1 | PPP2R4   | <a href="#">NM_178003.1</a> | PP2A;PR53;PTPA;MGC2184                | protein     | soluble     | protein     |
| GI_30089915-S | 374.3  | 449.9  | 380    | PACS1    | <a href="#">NM_018026.2</a> | FLJ10209;KIAA1175                     |             |             |             |
| GI_30089917-I | 226.7  | 272.7  | 228.9  | POLDIP3  | <a href="#">NM_032311.3</a> | PDIP46;KIAA1649                       |             |             |             |
| GI_30089918-A | 921.7  | 916.8  | 858.6  | POLDIP3  | <a href="#">NM_178136.1</a> | PDIP46;KIAA1649                       |             |             |             |
| GI_30089920-S | 185.4  | 218.4  | 218.3  | FBXO16   | <a href="#">NM_172366.2</a> | FBX16                                 |             |             |             |
| GI_30089921-A | 262.6  | 205.1  | 217    | FBXO11   | <a href="#">NM_012167.1</a> | VIT1;FBX11;FLJ12673;MGC44383;UG063H0  | ubiquitin   |             | ubiquitin-  |
| GI_30089921-I | 114.5  | 114.9  | 99.7   | FBXO11   | <a href="#">NM_012167.1</a> | VIT1;FBX11;FLJ12673;MGC44383;UG063H0  | ubiquitin   |             | ubiquitin-  |
| GI_30089923-I | 232.9  | 205.9  | 219.1  | FBXO11   | <a href="#">NM_018693.2</a> | VIT1;FBX11;FLJ12673;MGC44383;UG063H0  | ubiquitin   |             | ubiquitin-  |
| GI_30089925-I | 989.1  | 960.3  | 797.6  | FBXO11   | <a href="#">NM_025133.3</a> | VIT1;FBX11;FLJ12673;MGC44383;UG063H0  | ubiquitin   |             | ubiquitin-  |
| GI_30089927-A | 558.7  | 725    | 706.5  | ASAH1    | <a href="#">NM_177924.1</a> | AC;PHP;ASAH;PHP32;FLJ21558;FLJ22079   | catalytic   |             | ceramide    |
| GI_30089927-I | 369.1  | 401.4  | 608.4  | ASAH1    | <a href="#">NM_177924.1</a> | AC;PHP;ASAH;PHP32;FLJ21558;FLJ22079   | catalytic   |             | ceramide    |
| GI_30089929-I | 240.3  | 309.9  | 254.2  | ASAH1    | <a href="#">NM_004315.2</a> | AC;PHP;ASAH;PHP32;FLJ21558;FLJ22079   | catalytic   |             | ceramide    |
| GI_30089931-A | 382.4  | 361.1  | 331.7  | ASB6     | <a href="#">NM_177999.1</a> | MGC1024;FLJ20548                      |             |             |             |
| GI_30089933-I | 131.5  | 140.9  | 139.1  | ASB6     | <a href="#">NM_017873.2</a> | MGC1024;FLJ20548                      |             |             |             |
| GI_30089936-A | 1200.6 | 2053.4 | 1924.5 | HSPA5BP1 | <a href="#">NM_178031.1</a> | GBP;FLJ20539                          |             |             |             |
| GI_30089938-S | 1302.7 | 2020   | 1628.5 | GOLGA2   | <a href="#">NM_004486.3</a> | GM130;MGC20672                        |             | Golgi       |             |
| GI_30089939-S | 1388.3 | 1398   | 1546.3 | GOLGA3   | <a href="#">NM_005895.2</a> | MEA-2;GCP170                          | transporte  | Golgi       | intra-Golgi |
| GI_30089941-A | 528.2  | 661.6  | 562.4  | LHX3     | <a href="#">NM_178138.2</a> | M2-LHX3                               | RNA         | nucleus     | histogene   |
| GI_30089941-I | 116.9  | 103.5  | 111.2  | LHX3     | <a href="#">NM_178138.2</a> | M2-LHX3                               | RNA         | nucleus     | histogene   |
| GI_30089942-I | 111.4  | 122.2  | 106.8  | LHX3     | <a href="#">NM_014564.2</a> | M2-LHX3                               | RNA         | nucleus     | histogene   |
| GI_30089943-I | 595.9  | 599.4  | 661.3  | MGC5178  | <a href="#">NM_024044.2</a> | MGC2532;FLJ23439                      |             |             |             |
| GI_30089944-A | 3177.9 | 2819.1 | 3127.7 | MGC5178  | <a href="#">NM_178044.1</a> | MGC2532;FLJ23439                      |             |             |             |
| GI_30089946-S | 513.7  | 477.1  | 432.4  | POLDIP2  | <a href="#">NM_015584.2</a> | POLD4;PDIP38;DKFZP586F1524            |             |             |             |
| GI_30089947-S | 127.5  | 119.4  | 159.9  | PPM1E    | <a href="#">NM_014906.3</a> | POPX1;PP2CH;KIAA1072                  | protein     | protein     | protein     |
| GI_30089951-A | 344.7  | 171.3  | 220.8  | PTP9Q22  | <a href="#">NM_152422.3</a> | FLJ37312                              | protein     |             | protein     |
| GI_30089951-I | 147.1  | 168.1  | 188.4  | PTP9Q22  | <a href="#">NM_152422.3</a> | FLJ37312                              | protein     |             | protein     |
| GI_30089953-S | 2019.7 | 2198   | 1800.5 | H326     | <a href="#">NM_015726.2</a> |                                       |             |             |             |



|               |         |        |        |            |                             |                                       |             |             |            |
|---------------|---------|--------|--------|------------|-----------------------------|---------------------------------------|-------------|-------------|------------|
| GI_30089955-S | 328.2   | 320.5  | 528    | KRT7       | <a href="#">NM_005556.2</a> | K7;CK7;SCL;K2C7;MGC3625               | structural  | kinesin     | cytoskelet |
| GI_30089957-S | 2380.9  | 2279.4 | 2444.4 | MRPS36     | <a href="#">NM_033281.4</a> | DC47;MRP-S36;MGC22896                 | structural  | mitochond   | protein    |
| GI_30089958-S | 98.6    | 94.3   | 91.4   | ZNRF1      | <a href="#">NM_032268.3</a> | NIN283;FLJ14846;MGC15430;DKFZp434E2   |             |             |            |
| GI_30089959-A | 128     | 149.2  | 135.2  | CDC42BPA   | <a href="#">NM_014826.3</a> | MRCK;MRCKA;PK428;FLJ23347;KIAA0451    | protein     |             | protein    |
| GI_30089961-I | 143.2   | 178.4  | 160.7  | CDC42BPA   | <a href="#">NM_003607.2</a> | MRCK;MRCKA;PK428;FLJ23347;KIAA0451    | protein     |             | protein    |
| GI_30089963-S | 593.3   | 435.1  | 348.4  | CDC42EP2   | <a href="#">NM_006779.2</a> | CEP2;BORG1                            |             |             |            |
| GI_30089964-S | 215.6   | 239.2  | 137.4  | CDC42EP3   | <a href="#">NM_006449.3</a> | UB1;CEP3;BORG2                        | cytoskelet  |             | signal     |
| GI_30089965-S | 633.4   | 361.2  | 262.8  | CDC42EP5   | <a href="#">NM_145057.2</a> | CEP5;Borg3;MGC21945;1700027J19Rik;201 | DNA         | nucleus     | regulation |
| GI_30089967-A | 90.9    | 108.1  | 89.8   | C20orf41   | <a href="#">NM_016434.2</a> | NHL;KIAA1088;bK3184A7.3;DKFZP434C013  | helicase    | nucleus     | oncogene   |
| GI_30089967-I | 121     | 135.1  | 129.9  | C20orf41   | <a href="#">NM_016434.2</a> | NHL;KIAA1088;bK3184A7.3;DKFZP434C013  | helicase    | nucleus     | oncogene   |
| GI_30089968-I | 168.7   | 164.4  | 169.5  | C20orf41   | <a href="#">NM_032957.2</a> | NHL;KIAA1088;bK3184A7.3;DKFZP434C013  | helicase    | nucleus     | oncogene   |
| GI_30089975-I | 98.1    | 93.5   | 99     | CHRD       | <a href="#">NM_177978.1</a> |                                       |             |             | skeletal   |
| GI_30089977-A | 288.2   | 341.9  | 317.9  | CHRD       | <a href="#">NM_177979.1</a> |                                       |             |             | skeletal   |
| GI_30089990-I | 866.6   | 795.9  | 727.8  | ACP1       | <a href="#">NM_004300.2</a> | HAAP;MGC3499                          | acid        | soluble     |            |
| GI_30089991-S | 90.5    | 89.4   | 79     | ART5       | <a href="#">NM_053017.2</a> | MGC22848                              | NAD(P)-     | membran     | protein    |
| GI_30089993-A | 144.4   | 161.1  | 132.3  | ASB7       | <a href="#">NM_024708.2</a> | FLJ22551                              |             |             |            |
| GI_30089993-I | 103.3   | 117.1  | 107.4  | ASB7       | <a href="#">NM_024708.2</a> | FLJ22551                              |             |             |            |
| GI_30089996-A | 2638.4  | 2636.4 | 3055.3 | BAF53A     | <a href="#">NM_177989.1</a> | ACTL6;MGC5382                         | chromatin   | actin       | response   |
| GI_30090001-A | 3291.6  | 2671.3 | 2408.5 | ACP1       | <a href="#">NM_007099.2</a> | HAAP;MGC3499                          | acid        | soluble     |            |
| GI_30102932-A | 126.7   | 156.3  | 133.5  | KIR2DS4    | <a href="#">NM_178228.1</a> | PAX;KKA3;KIR1D;NKAT8;cl-39;CD158I     | MHC-        | integral to |            |
| GI_30102939-S | 155.3   | 188.5  | 169.8  | OTOP3      | <a href="#">NM_178233.1</a> |                                       |             |             |            |
| GI_30102943-S | 11068.3 | 13282  | 11471  | COAS2      | <a href="#">NM_178230.1</a> |                                       | cyclophilin |             | protein    |
| GI_30102945-S | 177.8   | 208.1  | 192.3  | ALS2CR14   | <a href="#">NM_178231.1</a> |                                       |             |             |            |
| GI_30141909-S | 106.4   | 116.3  | 94.6   | TNNI3      | <a href="#">NM_000363.3</a> | TNNC1                                 |             | troponin    | regulation |
| GI_30146994-S | 136.5   | 150.1  | 122.5  | CR1L       | <a href="#">XM_114735.5</a> |                                       |             |             |            |
| GI_30147327-S | 102     | 109.4  | 108.1  | LOC152098  | <a href="#">XM_087384.7</a> |                                       |             |             |            |
| GI_30147787-S | 97.8    | 106.9  | 105.8  | LOC344022  | <a href="#">XM_292889.2</a> |                                       |             |             |            |
| GI_30147807-S | 103     | 98.9   | 99.8   | LOC152586  | <a href="#">XM_087490.4</a> |                                       |             |             |            |
| GI_30148114-S | 79.4    | 80     | 81.8   | LOC284555  | <a href="#">XM_211518.2</a> |                                       |             |             |            |
| GI_30148215-S | 147.3   | 166    | 162    | LOC130643  | <a href="#">XM_059462.3</a> |                                       |             |             |            |
| GI_30148267-S | 103.7   | 108.4  | 106.5  | LOC90288   | <a href="#">XM_030669.8</a> |                                       |             |             |            |
| GI_30148318-S | 1349.4  | 883    | 847    | LOC339448  | <a href="#">XM_290902.2</a> |                                       |             |             |            |
| GI_30148676-S | 92.9    | 102.5  | 98.2   | LOC150519  | <a href="#">XM_086937.5</a> |                                       |             |             |            |
| GI_30149001-S | 105.6   | 172    | 177.5  | LOC129607  | <a href="#">XM_059368.4</a> |                                       |             |             |            |
| GI_30149009-S | 851     | 1498.1 | 940.2  | LOC285148  | <a href="#">XM_209490.3</a> |                                       |             |             |            |
| GI_30149745-S | 727.3   | 924.1  | 758.7  | LOC149345  | <a href="#">XM_086502.8</a> |                                       |             |             |            |
| GI_30149753-S | 203.9   | 243.5  | 194.2  | LGR6       | <a href="#">XM_097508.8</a> | FLJ14471;VTS20631                     |             |             |            |
| GI_30150161-S | 92.6    | 96.3   | 88.5   | LOC286031  | <a href="#">XM_209869.2</a> |                                       |             |             |            |
| GI_30150520-S | 146.9   | 139.8  | 143    | LOC256686  | <a href="#">XM_173012.2</a> |                                       |             |             |            |
| GI_30150654-S | 206.9   | 292.9  | 259.5  | ZNF406     | <a href="#">XM_114619.4</a> |                                       |             |             |            |
| GI_30151559-S | 107.3   | 110.5  | 100    | C9orf21    | <a href="#">XM_114685.3</a> |                                       |             |             |            |
| GI_30151609-S | 316.1   | 330.1  | 309.6  | DKFZP727GC | <a href="#">XM_045308.6</a> |                                       |             |             |            |
| GI_30151619-S | 205.8   | 234.3  | 205.6  | LOC158125  | <a href="#">XM_088492.4</a> |                                       |             |             |            |
| GI_30152203-S | 8406.8  | 7291.2 | 5316.6 | LOC222901  | <a href="#">XM_167275.4</a> |                                       |             |             |            |

|               |       |        |        |           |                             |                                             |             |          |            |
|---------------|-------|--------|--------|-----------|-----------------------------|---------------------------------------------|-------------|----------|------------|
| GI_30152429-S | 119.9 | 133.9  | 129    | FLJ36748  | <a href="#">XM_059702.7</a> |                                             |             |          |            |
| GI_30152488-S | 110.8 | 113.3  | 108.3  | KIAA1889  | <a href="#">XM_056298.5</a> |                                             |             |          |            |
| GI_30152745-S | 169.9 | 171.8  | 180.4  | LOC202051 | <a href="#">XM_114430.5</a> |                                             |             |          |            |
| GI_30153038-S | 242.7 | 305.5  | 282    | C14orf66  | <a href="#">XM_058681.6</a> |                                             |             |          |            |
| GI_30153291-S | 81.5  | 89.6   | 81     | LAMB4     | <a href="#">XM_209857.3</a> |                                             |             |          |            |
| GI_30154059-S | 191.4 | 202.3  | 157.6  | LOC92270  | <a href="#">XM_043989.7</a> |                                             |             |          |            |
| GI_30154219-S | 241.5 | 309.4  | 279.8  | KIAA0346  | <a href="#">XM_043272.7</a> |                                             |             |          |            |
| GI_30154228-S | 175   | 205.2  | 192.6  | LOC124751 | <a href="#">XM_064298.4</a> |                                             |             |          |            |
| GI_30154359-S | 184.4 | 205.6  | 159.8  | LDB3      | <a href="#">XM_084376.6</a> | ZASP;CYPHER;ORACLE;PDLIM6;KIAA0613; protein |             | electron |            |
| GI_30154419-S | 97.6  | 93.6   | 82.5   | LOC119563 | <a href="#">XM_061542.6</a> |                                             |             |          |            |
| GI_30155117-S | 144.1 | 120.9  | 113.3  | LOC342931 | <a href="#">XM_292796.2</a> |                                             |             |          |            |
| GI_30155180-S | 118.2 | 102.9  | 97     | RPEL1     | <a href="#">XM_166420.5</a> |                                             |             |          |            |
| GI_30155334-S | 182.5 | 224.3  | 221.2  | LOC284422 | <a href="#">XM_209196.2</a> |                                             |             |          |            |
| GI_30155379-S | 120.4 | 119.6  | 120.6  | LOC284425 | <a href="#">XM_211459.3</a> |                                             |             |          |            |
| GI_30155904-S | 111.9 | 126.2  | 107    | LOC283804 | <a href="#">XM_208847.2</a> |                                             |             |          |            |
| GI_30156121-S | 191.2 | 206.5  | 175.6  | LOC119774 | <a href="#">XM_061676.2</a> |                                             |             |          |            |
| GI_30156200-S | 170.4 | 179.1  | 158.2  | LOC119694 | <a href="#">XM_061626.3</a> |                                             |             |          |            |
| GI_30156406-S | 148.4 | 149.2  | 139.5  | LOC120364 | <a href="#">XM_062025.3</a> |                                             |             |          |            |
| GI_30156506-S | 172.5 | 208.1  | 187.1  | LOC283159 | <a href="#">XM_208543.2</a> |                                             |             |          |            |
| GI_30156512-S | 120.2 | 133.3  | 110.9  | LOC283160 | <a href="#">XM_208541.2</a> |                                             |             |          |            |
| GI_30156583-S | 89.9  | 109.3  | 97.5   | LOC347376 | <a href="#">XM_293312.2</a> |                                             |             |          |            |
| GI_30156720-S | 131.1 | 156.1  | 147.1  | KIAA1328  | <a href="#">XM_029429.5</a> |                                             |             |          |            |
| GI_30156893-S | 105.8 | 108.7  | 109    | OR5F1     | <a href="#">XM_291859.2</a> |                                             |             |          |            |
| GI_30156895-S | 191.1 | 237.6  | 206.5  | LOC219447 | <a href="#">XM_166808.2</a> |                                             |             |          |            |
| GI_30156899-S | 102.6 | 127.4  | 109.9  | LOC219477 | <a href="#">XM_166829.2</a> |                                             |             |          |            |
| GI_30157437-S | 235.4 | 246.6  | 267.5  | KIAA1542  | <a href="#">XM_290536.2</a> |                                             |             |          |            |
| GI_30157519-S | 118   | 123.3  | 99.2   | LOC139451 | <a href="#">XM_066701.4</a> |                                             |             |          |            |
| GI_30157606-S | 158.3 | 155.1  | 145.1  | LOC338797 | <a href="#">XM_290579.2</a> |                                             |             |          |            |
| GI_30157750-S | 216.2 | 251.6  | 235.9  | LOC284754 | <a href="#">XM_211627.2</a> |                                             |             |          |            |
| GI_30158015-S | 92.5  | 105.4  | 93.6   | KIAA1580  | <a href="#">XM_045271.7</a> |                                             |             |          |            |
| GI_30158339-S | 145.7 | 148.5  | 141.1  | LOC219414 | <a href="#">XM_169434.5</a> |                                             |             |          |            |
| GI_30158524-S | 123.3 | 132.2  | 128.7  | LOC146179 | <a href="#">XM_085354.3</a> |                                             |             |          |            |
| GI_30158785-S | 146.8 | 166.3  | 148.9  | LOC283902 | <a href="#">XM_211251.2</a> |                                             |             |          |            |
| GI_30159652-S | 185.3 | 228.6  | 199.5  | LOC340152 | <a href="#">XM_291154.2</a> |                                             |             |          |            |
| GI_30172563-S | 149.1 | 173.1  | 126.3  | VEGF      | <a href="#">NM_003376.3</a> | VEGFA                                       | vascular    | soluble  | positive   |
| GI_30179898-S | 218.6 | 256.4  | 208.4  | SOX10     | <a href="#">NM_006941.3</a> | DOM;WS4;MGC15649                            | RNA         | nucleus  | embryoge   |
| GI_30179899-S | 107.2 | 122    | 108.8  | SOX1      | <a href="#">NM_005986.2</a> |                                             | transcripti | nucleus  | establish  |
| GI_30179901-S | 740.8 | 2857.4 | 1267.8 | SOX4      | <a href="#">NM_003107.2</a> | EVI16                                       | transcripti | nucleus  | regulation |
| GI_30179902-S | 596.3 | 721.7  | 621.8  | SOX8      | <a href="#">NM_014587.2</a> | MGC24837                                    | RNA         |          | central    |
| GI_30179906-A | 453.2 | 607.8  | 528.1  | PILRA     | <a href="#">NM_178273.1</a> | FDF03                                       |             |          |            |
| GI_30179908-I | 84.7  | 92.6   | 85.7   | PILRA     | <a href="#">NM_013439.2</a> | FDF03                                       |             |          |            |
| GI_30179910-A | 581.1 | 681    | 558.3  | PILRB     | <a href="#">NM_178238.1</a> | FDFACT1;FDFACT2                             |             |          |            |
| GI_30179910-I | 115.7 | 131.6  | 115.5  | PILRB     | <a href="#">NM_178238.1</a> | FDFACT1;FDFACT2                             |             |          |            |
| GI_30179912-I | 124.5 | 141.3  | 129.8  | PILRB     | <a href="#">NM_175047.2</a> | FDFACT1;FDFACT2                             |             |          |            |

|               |        |        |        |           |                             |                                     |              |             |             |
|---------------|--------|--------|--------|-----------|-----------------------------|-------------------------------------|--------------|-------------|-------------|
| GI_30179914-I | 119.3  | 139.8  | 117.1  | PILRB     | <a href="#">NM_013440.3</a> | FDFACT1;FDFACT2                     |              |             |             |
| GI_30181229-S | 101.7  | 103    | 98.1   | REG1A     | <a href="#">NM_002909.3</a> | P19;PSP;PTP;REG;ICRF;PSPS;PSPS1;MGC | lectin [goid | positive    |             |
| GI_30181230-S | 188.4  | 203    | 179.7  | REG1B     | <a href="#">NM_006507.2</a> | REGH;REGL;PSPS2;REGI-BETA           | lectin [goid | cell        |             |
| GI_30181231-S | 95.3   | 102.4  | 89.2   | GPR132    | <a href="#">NM_013345.2</a> | G2A                                 | receptor     | integral to | G-protein   |
| GI_30181232-S | 353.3  | 393.5  | 313    | LRRN4     | <a href="#">NM_002319.2</a> | LRN;LRRN1                           |              |             | neurogene   |
| GI_30181234-S | 201.8  | 236.2  | 202.9  | ZNF165    | <a href="#">NM_003447.2</a> | LD65                                | transcripti  | nucleus     | regulation  |
| GI_30181235-S | 1082.9 | 927.5  | 1045.9 | CPNE2     | <a href="#">NM_152727.4</a> | CPN2;COPN2;MGC16924                 |              |             |             |
| GI_30181237-S | 95.5   | 93.4   | 82.7   | C1orf25   | <a href="#">NM_030934.3</a> | MGC57134;bG120K12.3                 | RNA          |             | tRNA        |
| GI_30181239-I | 110.4  | 129.4  | 110.4  | DCX       | <a href="#">NM_178151.1</a> | DC;DBCN;LISX;SCLH;XLIS              | microtubul   | microtubul  | central     |
| GI_30181243-A | 300.6  | 356.5  | 343.5  | DCX       | <a href="#">NM_178153.1</a> | DC;DBCN;LISX;SCLH;XLIS              | microtubul   | microtubul  | central     |
| GI_30181245-I | 117    | 127.7  | 111.4  | DCX       | <a href="#">NM_000555.2</a> | DC;DBCN;LISX;SCLH;XLIS              | microtubul   | microtubul  | central     |
| GI_30240931-S | 1515.5 | 1053.9 | 2244.4 | EHD1      | <a href="#">NM_006795.2</a> | PAST;PAST1;H-PAST;HPAST1            | ATP          | kinesin     | biological_ |
| GI_30240938-S | 98.6   | 103.8  | 117.9  | HCG9      | <a href="#">NM_005844.2</a> | HCGIX;HCGIX4;PERB11;HCGIX-4         | molecular    | cellular_co | biological_ |
| GI_30260186-A | 1186.4 | 1320.7 | 1494.7 | ATPIF1    | <a href="#">NM_016311.3</a> | ATPI;MGC1167;MGC8898                | enzyme       | mitochond   | energy      |
| GI_30260187-S | 1018.1 | 1159.3 | 1015.3 | GOLGA5    | <a href="#">NM_005113.2</a> | RFG5;ret-II                         |              | Golgi       |             |
| GI_30260191-I | 111.9  | 134.3  | 167.2  | ATPIF1    | <a href="#">NM_178191.1</a> | ATPI;MGC1167;MGC8898                | enzyme       | mitochond   | energy      |
| GI_30260193-S | 98.6   | 99.1   | 94.5   | GOLGA6    | <a href="#">NM_018652.2</a> | GLP                                 |              | kinesin     |             |
| GI_30315648-A | 117.9  | 145.4  | 121.8  | MBNL3     | <a href="#">NM_133486.1</a> | CHCR;MBLX;MBXL;MBLX39;FLJ11316      | nucleic      | nucleus     | developm    |
| GI_30315648-I | 84.5   | 93.2   | 80.9   | MBNL3     | <a href="#">NM_133486.1</a> | CHCR;MBLX;MBXL;MBLX39;FLJ11316      | nucleic      | nucleus     | developm    |
| GI_30315650-S | 100.2  | 99.8   | 90.5   | DMRT3     | <a href="#">NM_021240.2</a> | DMRTA3                              | transcripti  | nucleus     | sex         |
| GI_30315657-A | 186.2  | 254.5  | 204.4  | SPTBN1    | <a href="#">NM_178313.1</a> | SPTB2                               | actin        | spectrin    |             |
| GI_30315657-I | 105.3  | 132.4  | 102    | SPTBN1    | <a href="#">NM_178313.1</a> | SPTB2                               | actin        | spectrin    |             |
| GI_30348953-S | 111.6  | 137.2  | 116.3  | MIB       | <a href="#">NM_020774.1</a> |                                     | zinc ion     |             |             |
| GI_30348973-S | 98.8   | 91.4   | 92.9   | ARL11     | <a href="#">NM_138450.3</a> | ARLTS1;MGC17429                     |              |             |             |
| GI_30348976-S | 2185.9 | 1885.9 | 3025.1 | CBX6      | <a href="#">NM_014292.2</a> |                                     | chromatin    | chromatin   | chromatin   |
| GI_30350209-A | 90.1   | 89.7   | 104.9  | APRG1     | <a href="#">NM_178343.1</a> |                                     |              |             |             |
| GI_30350209-I | 75.4   | 81.5   | 77.9   | APRG1     | <a href="#">NM_178343.1</a> |                                     |              |             |             |
| GI_30350213-I | 459.4  | 560.5  | 502.3  | APRG1     | <a href="#">NM_178342.1</a> |                                     |              |             |             |
| GI_30350215-I | 88.3   | 89.6   | 87.1   | APRG1     | <a href="#">NM_178344.1</a> |                                     |              |             |             |
| GI_30387616-S | 112.9  | 108.8  | 104    | APCDD1    | <a href="#">NM_153000.3</a> | B7323;DRAPC1                        |              |             |             |
| GI_30387641-S | 194.4  | 221.9  | 190.2  | SPRL4A    | <a href="#">NM_178356.1</a> | LEP8                                |              |             |             |
| GI_30387645-S | 151.2  | 160.1  | 159.6  | LEP6      | <a href="#">NM_178354.1</a> |                                     |              |             |             |
| GI_30387647-S | 156.8  | 158.3  | 140.1  | LEP4      | <a href="#">NM_178352.1</a> |                                     |              |             |             |
| GI_30387649-S | 243.1  | 304.4  | 276.3  | LEP5      | <a href="#">NM_178353.1</a> |                                     |              |             |             |
| GI_30387651-S | 483.4  | 608.6  | 539.7  | LEP3      | <a href="#">NM_178351.1</a> |                                     |              |             |             |
| GI_30387653-S | 114    | 131.5  | 130    | LEP1      | <a href="#">NM_178348.1</a> |                                     |              |             |             |
| GI_30387655-S | 259.6  | 365.1  | 304.2  | SPRL2A    | <a href="#">NM_178349.1</a> | LEP2                                |              |             |             |
| GI_30409981-S | 2153.5 | 3921.4 | 2190.4 | LAPTM4B   | <a href="#">NM_018407.3</a> | LC27;LAPTM4beta                     |              | integral to |             |
| GI_30410024-S | 120.7  | 114.6  | 106.9  | FLJ31204  | <a href="#">NM_174912.2</a> |                                     | amidase      |             |             |
| GI_30410025-S | 164    | 187.7  | 177    | FLJ30507  | <a href="#">NM_153010.3</a> |                                     |              |             |             |
| GI_30410026-S | 105.2  | 117.5  | 106.6  | FLJ90724  | <a href="#">NM_153692.2</a> |                                     |              |             |             |
| GI_30410031-S | 127.6  | 131.5  | 117.8  | PSMAL/GCP | <a href="#">NM_153696.2</a> |                                     | peptidase    |             | proteolysis |
| GI_30410034-S | 246.4  | 286.2  | 268.4  | SPRL5A    | <a href="#">NM_178438.1</a> | LEP18                               |              |             |             |
| GI_30410036-S | 113.4  | 128.9  | 118.7  | SPRL3A    | <a href="#">NM_178434.1</a> | LEP15                               |              |             |             |

|               |        |        |        |           |                             |                                       |             |                        |
|---------------|--------|--------|--------|-----------|-----------------------------|---------------------------------------|-------------|------------------------|
| GI_30410038-S | 149.3  | 171.2  | 149.6  | LEP13     | <a href="#">NM_178431.1</a> |                                       |             |                        |
| GI_30410040-S | 197.8  | 250.3  | 202.2  | LEP14     | <a href="#">NM_178433.1</a> |                                       |             |                        |
| GI_30410042-S | 253.4  | 271.2  | 253    | SPRL1A    | <a href="#">NM_178430.1</a> | LEP12                                 |             |                        |
| GI_30410044-S | 98.5   | 115.9  | 101.2  | LEP9      | <a href="#">NM_178428.1</a> |                                       |             |                        |
| GI_30410046-S | 315.9  | 383.7  | 352.6  | LEP11     | <a href="#">NM_178429.1</a> |                                       |             |                        |
| GI_30410709-S | 376.6  | 300.9  | 375.8  | SEC15L1   | <a href="#">NM_019053.2</a> | EXOC6;SEC15L;Sec15p;FLJ1125;FLJ11251; |             |                        |
| GI_30410711-S | 586.8  | 657.4  | 629.4  | SEC23IP   | <a href="#">NM_007190.2</a> | P125;MSTP053                          | protein     | ER-Golgi Golgi         |
| GI_30410715-A | 1235.7 | 1178.6 | 917.2  | SEC3L1    | <a href="#">NM_178237.1</a> | SEC3;EXOC1;Sec3p;BM-102;FLJ10893      | protein     | kinesin intracellula   |
| GI_30410717-S | 110.2  | 101.2  | 98.6   | SEC14L3   | <a href="#">NM_174975.2</a> | TAP2                                  | transporte  | intracellula transport |
| GI_30410718-S | 117.1  | 133.4  | 123.1  | SEC14L4   | <a href="#">NM_174977.2</a> | TAP3                                  | transporte  | intracellula transport |
| GI_30410721-I | 94.3   | 85.3   | 80.4   | FUT8      | <a href="#">NM_004480.3</a> | MGC26465                              | glycoprote  | Golgi oligosacch       |
| GI_30410729-A | 864.3  | 1596.5 | 1706.4 | FUT8      | <a href="#">NM_178157.1</a> | MGC26465                              | glycoprote  | Golgi oligosacch       |
| GI_30410773-S | 270.1  | 392.5  | 850    | TBC1D8    | <a href="#">NM_007063.2</a> | 1;AD3;VRP;HBLP1                       | GTPase      | membran positive       |
| GI_30410776-I | 89.1   | 96.1   | 92.6   | HYPB      | <a href="#">NM_012271.1</a> | HIF1;FLJ22472;KIAA1732                |             |                        |
| GI_30410778-A | 258.2  | 283.7  | 253.2  | HYPB      | <a href="#">NM_014159.3</a> | HIF1;FLJ22472;KIAA1732                |             |                        |
| GI_30410780-A | 334.8  | 373.4  | 337.1  | FLJ12949  | <a href="#">NM_178159.1</a> |                                       |             |                        |
| GI_30410784-S | 121.7  | 144    | 181.3  | LHX1      | <a href="#">NM_005568.2</a> | LIM1;LIM-1                            | RNA         | nucleus histogene      |
| GI_30410786-S | 166.7  | 213.7  | 195    | LHX4      | <a href="#">NM_033343.2</a> | Gsh-4                                 | transcripti | nucleus regulation     |
| GI_30410787-I | 136.2  | 150    | 129.6  | TUSC3     | <a href="#">NM_006765.2</a> | N33;D8S1992;MGC13453                  | tumor       | integral to electron   |
| GI_30410789-A | 1904.2 | 2188.2 | 2120.2 | TUSC3     | <a href="#">NM_178234.1</a> | N33;D8S1992;MGC13453                  | tumor       | integral to electron   |
| GI_30410791-S | 1911.1 | 2332.2 | 1836.5 | PSME2     | <a href="#">NM_002818.2</a> | PA28B;REGbeta;PA28beta                | proteasom   | 26S immune             |
| GI_30410793-A | 1006.3 | 1137.5 | 1163.4 | PSME3     | <a href="#">NM_005789.2</a> | Ki;PA28G;REG-GAMMA;PA28-gamma         | proteasom   | 26S                    |
| GI_30410799-A | 979.7  | 922.2  | 807.1  | APG4B     | <a href="#">NM_013325.3</a> | AUTL1;MGC1353;KIAA0943;DKFZp586D182   |             |                        |
| GI_30410800-S | 105.1  | 100.3  | 100.1  | FHL5      | <a href="#">NM_020482.3</a> | ACT;FLJ33049;dJ393D12.2               | catalytic   |                        |
| GI_30410802-A | 91.9   | 185.6  | 103.1  | CDCP1     | <a href="#">NM_178181.1</a> | FLJ22969;MGC31813                     |             |                        |
| GI_30410802-I | 327.4  | 457.2  | 371.5  | CDCP1     | <a href="#">NM_178181.1</a> | FLJ22969;MGC31813                     |             |                        |
| GI_30410804-I | 241.7  | 1034.7 | 224.6  | CDCP1     | <a href="#">NM_022842.3</a> | FLJ22969;MGC31813                     |             |                        |
| GI_30410845-A | 557.1  | 605.5  | 500.6  | AUTL1     | <a href="#">NM_178221.1</a> | AUTL3;APG4-C;FLJ14867;MGC32915        |             |                        |
| GI_30425377-S | 422.8  | 450.1  | 368.9  | MGC54289  | <a href="#">NM_178454.1</a> |                                       |             |                        |
| GI_30425381-S | 284.8  | 310.4  | 262.6  | PTPNS1L2  | <a href="#">NM_178460.1</a> | dJ576H24.4                            |             |                        |
| GI_30425383-S | 142.7  | 159.3  | 157    | C20orf78  | <a href="#">NM_178462.1</a> |                                       |             |                        |
| GI_30425385-S | 106.5  | 122    | 109.3  | C20orf166 | <a href="#">NM_178463.1</a> | FLJ32423;dJ353C17.1                   |             |                        |
| GI_30425387-S | 132.7  | 162.7  | 133.8  | TSPYL3    | <a href="#">NM_178465.1</a> | bA392M18.1                            | DNA         | nucleus nucleoso       |
| GI_30425389-S | 116.7  | 147.7  | 122.3  | C20orf71  | <a href="#">NM_178466.1</a> | SPLUNC3;bA49G10.4                     | lipid       |                        |
| GI_30425391-S | 86.4   | 89.7   | 84.2   | HMG4L     | <a href="#">NM_178467.1</a> | dJ18C9.3                              | DNA         | chromatin chromoso     |
| GI_30425393-S | 95.8   | 102.6  | 93.9   | C20orf128 | <a href="#">NM_178468.1</a> | dJ614O4.7                             |             |                        |
| GI_30425399-S | 188.7  | 239.7  | 212    | GPR119    | <a href="#">NM_178471.1</a> | GPCR2;hGPCR2                          | electron    | integral to electron   |
| GI_30425401-S | 2828   | 1757.3 | 1416.4 | C20orf53  | <a href="#">NM_178472.1</a> | bA353C18.4                            |             |                        |
| GI_30425403-S | 209    | 240.9  | 201.9  | C20orf179 | <a href="#">NM_178477.1</a> | dJ803K15.1                            | DNA         | nucleus                |
| GI_30425405-S | 87.4   | 91     | 87.5   | C20orf79  | <a href="#">NM_178483.1</a> | dJ1068E13.2                           | sterol      |                        |
| GI_30425409-S | 99.9   | 108.8  | 108.2  | R3HDML    | <a href="#">NM_178491.1</a> | dJ881L22.3                            |             | extracellul            |
| GI_30425443-S | 105.5  | 127.1  | 104.2  | ANKK1     | <a href="#">NM_178510.1</a> | X-kinase                              | protein-    | protein                |
| GI_30425541-S | 265.2  | 252.8  | 228.4  | C17orf31  | <a href="#">NM_017575.3</a> | EST1A;SMG-6;KIAA0732                  |             |                        |
| GI_30425545-S | 1460.2 | 1626.7 | 1346.2 | C14orf11  | <a href="#">NM_018453.2</a> | BM036;FLJ20578                        |             |                        |

|               |         |        |        |            |                             |                                       |             |             |              |
|---------------|---------|--------|--------|------------|-----------------------------|---------------------------------------|-------------|-------------|--------------|
| GI_30425552-S | 123.2   | 133.2  | 115.7  | RTN4RL1    | <a href="#">NM_178568.1</a> | NgR3;NGRH2;DKFZp547J144               | receptor    |             |              |
| GI_30425562-S | 267.4   | 287.5  | 276.5  | RTN4RL2    | <a href="#">NM_178570.1</a> | NgR2;NGRH1                            | receptor    |             |              |
| GI_30466257-S | 250.4   | 293.7  | 265.6  | OSTalpha   | <a href="#">NM_152672.2</a> | MGC39807                              |             |             |              |
| GI_30466265-S | 2529.9  | 2548.5 | 2489.9 | MCFD2      | <a href="#">NM_139279.2</a> | F5F8D;SDNSF;LMAN1IP                   | calcium     |             |              |
| GI_30474867-I | 1865.6  | 2082.5 | 1727.2 | SPTLC1     | <a href="#">NM_006415.2</a> | HSAN;HSN1;LBC1;LCB1;SPT1;SPTI;HSAN1   | serine C-   | endoplas    | sphingolipi  |
| GI_30474868-I | 137.1   | 137.2  | 137    | RASSF4     | <a href="#">NM_032023.3</a> | AD037;MGC44914                        |             |             | neuropepti   |
| GI_30474869-I | 674     | 758.7  | 1080.8 | HRIHFB2122 | <a href="#">NM_007032.3</a> | KIAA1662;dJ37E16.4                    | F-actin     | kinesin     | actin        |
| GI_30474870-A | 359.3   | 370.5  | 324.3  | SPTLC1     | <a href="#">NM_178324.1</a> | HSAN;HSN1;LBC1;LCB1;SPT1;SPTI;HSAN1   | serine C-   | endoplas    | sphingolipi  |
| GI_30474870-I | 109.5   | 112.7  | 113.3  | SPTLC1     | <a href="#">NM_178324.1</a> | HSAN;HSN1;LBC1;LCB1;SPT1;SPTI;HSAN1   | serine C-   | endoplas    | sphingolipi  |
| GI_30474872-A | 589.2   | 624.6  | 634.1  | RASSF4     | <a href="#">NM_178145.1</a> | AD037;MGC44914                        |             |             | neuropepti   |
| GI_30519882-I | 118.9   | 121.4  | 115.5  | GTF2IRD2   | <a href="#">NM_173537.1</a> | FLJ21423                              |             |             |              |
| GI_30520362-S | 107.5   | 109.8  | 111.5  | SLCO6A1    | <a href="#">NM_173488.2</a> | OATPY;OATP6A1;MGC26949                | transporte  | membran     | transport    |
| GI_30520372-S | 428.5   | 409.5  | 282.3  | CADPS2     | <a href="#">NM_017954.7</a> |                                       |             |             |              |
| GI_30524927-S | 117.1   | 119.1  | 119.4  | NOD3       | <a href="#">NM_178844.1</a> | FLJ00348                              |             |             |              |
| GI_30578409-S | 718.6   | 730.7  | 445.3  | SIMP       | <a href="#">NM_178862.1</a> |                                       | oligosacch  | membran     | protein      |
| GI_30581108-I | 279     | 330.2  | 321.6  | HM13       | <a href="#">NM_178580.1</a> | H13;SPP;IMP1;PSL3;IMPAS;PSENL3;dJ324  | peptidase   | integral to |              |
| GI_30581112-I | 112     | 123.4  | 130.1  | HM13       | <a href="#">NM_178582.1</a> | H13;SPP;IMP1;PSL3;IMPAS;PSENL3;dJ324  | peptidase   | integral to |              |
| GI_30581114-A | 542     | 805.5  | 787    | HM13       | <a href="#">NM_030789.2</a> | H13;SPP;IMP1;PSL3;IMPAS;PSENL3;dJ324  | peptidase   | integral to |              |
| GI_30581115-S | 121.8   | 138.8  | 141    | SOX11      | <a href="#">NM_003108.3</a> |                                       | transcripti | nucleus     | neurogene    |
| GI_30581116-I | 125.4   | 154.5  | 130.7  | SOX30      | <a href="#">NM_178424.1</a> |                                       | RNA         | nucleus     | spermatog    |
| GI_30581118-A | 133.3   | 132.8  | 129.2  | SOX30      | <a href="#">NM_007017.2</a> |                                       | RNA         | nucleus     | spermatog    |
| GI_30581119-S | 297.6   | 308.3  | 216.3  | SOX7       | <a href="#">NM_031439.2</a> | MGC10895                              |             |             |              |
| GI_30581133-S | 223.3   | 276.7  | 244.3  | SEC5L1     | <a href="#">NM_018303.4</a> | SEC5;EXOC2;Sec5p;FLJ11026             | protein     | kinesin     | intracellula |
| GI_30581134-S | 182.9   | 174.6  | 152.1  | SMC1L1     | <a href="#">NM_006306.2</a> | SMC1;SMCB;SB1.8;DXS423E;KIAA0178;SM   | adenosine   | mitotic     | mitotic      |
| GI_30581136-S | 392.6   | 530    | 478.7  | SMP3       | <a href="#">NM_025163.2</a> | FLJ12768;MGC52163                     |             |             |              |
| GI_30581139-A | 11239.1 | 12054  | 9657.2 | PSME1      | <a href="#">NM_006263.2</a> | PA28A;IFI5111;MGC8628;REGalpha;PA28al | proteasom   | 26S         | immune       |
| GI_30581140-I | 129.1   | 158.1  | 147.7  | PSME1      | <a href="#">NM_176783.1</a> | PA28A;IFI5111;MGC8628;REGalpha;PA28al | proteasom   | 26S         | immune       |
| GI_30581142-I | 174.6   | 206.2  | 208.9  | PSMF1      | <a href="#">NM_178578.1</a> | PI31                                  | proteasom   | cytosol     | ubiquitin-   |
| GI_30581144-A | 1579.5  | 1518.7 | 914.8  | PSMF1      | <a href="#">NM_178579.1</a> | PI31                                  | proteasom   | cytosol     | ubiquitin-   |
| GI_30581147-A | 110.7   | 110.8  | 117    | NR2E3      | <a href="#">NM_014249.2</a> | PNR;RNR;ESCS;MGC49976                 | ligand-     | nucleus     | photorece    |
| GI_30581147-I | 103.9   | 122.5  | 104.4  | NR2E3      | <a href="#">NM_014249.2</a> | PNR;RNR;ESCS;MGC49976                 | ligand-     | nucleus     | photorece    |
| GI_30581148-I | 96.1    | 94.4   | 86     | NR2E3      | <a href="#">NM_016346.2</a> | PNR;RNR;ESCS;MGC49976                 | ligand-     | nucleus     | photorece    |
| GI_30581151-A | 100     | 128.5  | 107.8  | GNRH2      | <a href="#">NM_178332.1</a> | GnRH-II;LH-RHII                       | hormone     | soluble     | signal       |
| GI_30581154-I | 121.6   | 124.1  | 107.7  | GGTLA4     | <a href="#">NM_178311.1</a> | MGC50550;dJ831C21.2                   | gamma-      |             |              |
| GI_30581156-A | 140.8   | 145.9  | 142.3  | GGTLA4     | <a href="#">NM_178312.1</a> | MGC50550;dJ831C21.2                   | gamma-      |             |              |
| GI_30581158-I | 113.7   | 113.9  | 110.2  | GGTLA4     | <a href="#">NM_080920.2</a> | MGC50550;dJ831C21.2                   | gamma-      |             |              |
| GI_30581159-S | 134.2   | 143.9  | 124.3  | GDAP1L1    | <a href="#">NM_024034.3</a> | dJ995J12.1.1                          |             |             |              |
| GI_30581161-S | 95.5    | 131.5  | 110.8  | GHRH       | <a href="#">NM_021081.3</a> | GRF;GHRF                              | receptor    | extracellul | G-protein    |
| GI_30581162-S | 115.7   | 115.6  | 106.4  | GPR73L1    | <a href="#">NM_144773.2</a> | PKR2;GPRg2;GPR73b;dJ680N4.3           | neuropepti  | integral to | G-protein    |
| GI_30581163-S | 223.9   | 250.6  | 230.9  | GPR8       | <a href="#">NM_005286.2</a> |                                       | opioid      | integral to | G-protein    |
| GI_30581166-S | 2323.6  | 2699   | 3683   | GSS        | <a href="#">NM_000178.2</a> | GSHS;MGC14098                         | glutathion  |             | amino        |
| GI_30581167-S | 98.5    | 94.9   | 92     | CAPZA3     | <a href="#">NM_033328.2</a> | Gsg3;CAPPA3                           | structural  | F-actin     | actin        |
| GI_30581168-I | 80.6    | 86.8   | 79.8   | CCR3       | <a href="#">NM_001837.2</a> | CKR3;CMKBR3;CC-CKR-3                  | chemokin    | integral to | cytosolic    |
| GI_30581169-A | 107.5   | 106.5  | 99.7   | CCR3       | <a href="#">NM_178329.1</a> | CKR3;CMKBR3;CC-CKR-3                  | chemokin    | integral to | cytosolic    |

|               |        |        |        |          |                             |                                   |             |              |             |
|---------------|--------|--------|--------|----------|-----------------------------|-----------------------------------|-------------|--------------|-------------|
| GI_30749197-A | 898.8  | 1063.2 | 1000.3 | FBXW5    | <a href="#">NM_178226.1</a> | MGC20962;DKFZP434B205             |             |              |             |
| GI_30794213-S | 101.5  | 107.4  | 108.4  | KIAA1712 | <a href="#">NM_030633.1</a> |                                   |             |              |             |
| GI_30794215-S | 419.7  | 376.5  | 321.7  | TRIM56   | <a href="#">NM_030961.1</a> | RNF109;DKFZP667O116               | nucleic     | intracellula |             |
| GI_30794221-S | 808    | 725.2  | 1127.6 | BTBD6    | <a href="#">NM_033271.1</a> | BDPL                              |             |              |             |
| GI_30794245-S | 501    | 530.7  | 472.4  | LOC90736 | <a href="#">NM_138362.1</a> |                                   |             |              |             |
| GI_30794367-I | 97.3   | 103.5  | 106.7  | PB1      | <a href="#">NM_018313.2</a> | BAF180                            |             |              |             |
| GI_30794371-A | 243.5  | 263.2  | 231.8  | PB1      | <a href="#">NM_018165.2</a> | BAF180                            |             |              |             |
| GI_30794371-I | 236.6  | 279    | 249.7  | PB1      | <a href="#">NM_018165.2</a> | BAF180                            |             |              |             |
| GI_30794375-S | 103.2  | 94.7   | 96.9   | DOLPP1   | <a href="#">NM_020438.2</a> | LSFR2                             |             |              |             |
| GI_30794471-S | 149.2  | 176.5  | 149.3  | HAPLN4   | <a href="#">NM_023002.1</a> | BRAL2;KIAA1926                    |             |              |             |
| GI_30794487-S | 100.4  | 102.8  | 93.9   | KIF27    | <a href="#">NM_017576.1</a> | DKFZp434D0917                     |             |              |             |
| GI_30794491-S | 395.7  | 484.9  | 341.5  | FBLP-1   | <a href="#">NM_017556.1</a> | FBLP1;MIGFILIN;DKFZp434G171       | electron    | cytoskelet   | electron    |
| GI_30794493-S | 105.4  | 108.1  | 103.3  | ZC3HDC3  | <a href="#">NM_015117.1</a> | KIAA0150                          | nucleic     |              |             |
| GI_30794499-S | 1222.2 | 1823.8 | 737.8  | AOF2     | <a href="#">NM_015013.1</a> | BHC110;KIAA0601                   |             |              | electron    |
| GI_30794501-S | 101.3  | 108.4  | 95.5   | ASAH1    | <a href="#">NM_014435.1</a> |                                   | molecular   | cellular_co  | biological_ |
| GI_30794503-S | 131.9  | 155    | 140    | ZNF354C  | <a href="#">NM_014594.1</a> | KID3                              | nucleic     | nucleus      | regulation  |
| GI_30795116-I | 96.7   | 122.2  | 99.8   | FBXO18   | <a href="#">NM_032807.3</a> | FBH1;FLJ14590                     |             |              |             |
| GI_30795118-A | 2005.6 | 1993.4 | 1760.2 | FBXO18   | <a href="#">NM_178150.1</a> | FBH1;FLJ14590                     |             |              |             |
| GI_30795120-A | 310.7  | 315.9  | 305.8  | FBXW8    | <a href="#">NM_012174.1</a> | FBX29;FBXO29;MGC33534             | ubiquitin   |              | ubiquitin-  |
| GI_30795122-I | 101.2  | 99.1   | 85.9   | FBXW8    | <a href="#">NM_153348.2</a> | FBX29;FBXO29;MGC33534             | ubiquitin   |              | ubiquitin-  |
| GI_30795179-I | 147.1  | 170    | 148    | ZFYVE1   | <a href="#">NM_021260.1</a> | DFCP1;TAFF1;ZNFN2A1;KIAA1589      | zinc ion    | Golgi        |             |
| GI_30795181-A | 824.3  | 959.7  | 909.4  | ZFYVE1   | <a href="#">NM_178441.1</a> | DFCP1;TAFF1;ZNFN2A1;KIAA1589      | zinc ion    | Golgi        |             |
| GI_30795185-A | 1929.2 | 1914.5 | 1797.9 | WDFY1    | <a href="#">NM_178350.1</a> | WDF1;FENS-1;ZFYVE17;KIAA1435      |             |              |             |
| GI_30795187-S | 115.6  | 122.1  | 106.8  | WBSCR19  | <a href="#">NM_175064.2</a> | DKFZp434A1014                     |             |              |             |
| GI_30795189-S | 189.1  | 164.8  | 192.4  | WBSCR27  | <a href="#">NM_152559.2</a> | MGC40131                          |             |              |             |
| GI_30795191-I | 148.3  | 218.8  | 179.7  | WDFY1    | <a href="#">NM_020830.2</a> | WDF1;FENS-1;ZFYVE17;KIAA1435      |             |              |             |
| GI_30795192-A | 1698.6 | 1393.6 | 1595.4 | 10-Sep   | <a href="#">NM_178584.1</a> | FLJ11619                          |             |              |             |
| GI_30795194-I | 101.1  | 109.3  | 99.2   | 10-Sep   | <a href="#">NM_144710.2</a> | FLJ11619                          |             |              |             |
| GI_30795195-S | 132.6  | 152.7  | 113.9  | LHX2     | <a href="#">NM_004789.3</a> | LH2;hLhx2                         | transcripti | nucleus      | oncogene    |
| GI_30795197-S | 160.6  | 169    | 176    | LHX5     | <a href="#">NM_022363.2</a> |                                   | transcripti | nucleus      | central     |
| GI_30795198-I | 93.6   | 98     | 120.4  | HTR7     | <a href="#">NM_019859.2</a> |                                   | serotonin   | integral to  | circadian   |
| GI_30795200-A | 395.9  | 625.7  | 691.5  | HTR7     | <a href="#">NM_000872.3</a> |                                   | serotonin   | integral to  | circadian   |
| GI_30795201-I | 241.4  | 249.6  | 218.8  | HDAC9    | <a href="#">NM_178423.1</a> | HD7;HDAC;HDRP;MITR;HDAC7;HDAC7B;H | histone     | nucleus      | regulation  |
| GI_30795205-S | 493.9  | 564.8  | 576.1  | PPP2R5A  | <a href="#">NM_006243.2</a> |                                   | protein     | protein      | signal      |
| GI_30795206-S | 259.9  | 328.5  | 373.2  | PPP2R5B  | <a href="#">NM_006244.2</a> |                                   | protein     | protein      | signal      |
| GI_30795207-I | 113.2  | 116.7  | 111.4  | IL19     | <a href="#">NM_013371.2</a> | MDA1;NG.1;ZMDA1;IL-10C            | cytokine    | extracellul  | immune      |
| GI_30795209-A | 104.1  | 103.9  | 114.4  | IL19     | <a href="#">NM_153758.1</a> | MDA1;NG.1;ZMDA1;IL-10C            | cytokine    | extracellul  | immune      |
| GI_30795209-I | 93     | 83.4   | 85.3   | IL19     | <a href="#">NM_153758.1</a> | MDA1;NG.1;ZMDA1;IL-10C            | cytokine    | extracellul  | immune      |
| GI_30795211-S | 1214.3 | 1623.8 | 1814.3 | IMP-3    | <a href="#">NM_006547.2</a> | KOC1;VICKZ3                       | RNA         | cytoplasm    | RNA         |
| GI_30795213-S | 91.9   | 142.6  | 103.5  | CCR7     | <a href="#">NM_001838.2</a> | BLR2;EBI1;CDw197;CMKBR7           | chemokine   | integral to  | cytosolic   |
| GI_30795214-A | 84.2   | 105.5  | 131    | CCRK     | <a href="#">NM_012119.2</a> | p42;CDCH                          |             |              |             |
| GI_30795216-I | 96.7   | 99.2   | 107.9  | CCRL1    | <a href="#">NM_178445.1</a> | PPR1;CCBP2;CCR10;CCR11;VSHK1;CKR- | chemokine   | integral to  | chemotaxi   |
| GI_30795218-A | 80.1   | 73.5   | 80.8   | CCRL1    | <a href="#">NM_016557.2</a> | PPR1;CCBP2;CCR10;CCR11;VSHK1;CKR- | chemokine   | integral to  | chemotaxi   |
| GI_30795218-I | 151.7  | 180.7  | 169.4  | CCRL1    | <a href="#">NM_016557.2</a> | PPR1;CCBP2;CCR10;CCR11;VSHK1;CKR- | chemokine   | integral to  | chemotaxi   |

|               |        |        |        |           |                             |                                        |             |                        |
|---------------|--------|--------|--------|-----------|-----------------------------|----------------------------------------|-------------|------------------------|
| GI_30795219-S | 192.2  | 203.1  | 166.3  | CRNKL1    | <a href="#">NM_016652.3</a> | CRN;HCRN;MSTP021                       | nucleus     | mRNA                   |
| GI_30795223-S | 328.1  | 358.1  | 435.9  | TM4SF10   | <a href="#">NM_031442.2</a> | BCMP1;MGC32949;DKFZp564E153;DKFZP7     |             |                        |
| GI_30795224-S | 87.1   | 263.7  | 101.2  | BM88      | <a href="#">NM_016564.2</a> | MGC34326                               | integral to |                        |
| GI_30795226-S | 1213.7 | 1068.2 | 595.3  | HARS2     | <a href="#">NM_080820.3</a> | C20orf88;MGC41905;bA379J5.3;bA555E18.1 | hydrolase   | cytoplasm D-amino      |
| GI_30795228-S | 336    | 401.9  | 355.6  | HCK       | <a href="#">NM_002110.2</a> | JTK9                                   | protein-    | peripheral mesoderm    |
| GI_30795230-S | 5017.7 | 5685.2 | 8266.3 | BASP1     | <a href="#">NM_006317.3</a> | CAP23;NAP22;CAP-23;NAP-22;MGC8555      | DNA         | cytoskelet regulation  |
| GI_30795232-S | 189.4  | 249    | 210.5  | BICC1     | <a href="#">NM_025044.2</a> | FLJ22476                               |             |                        |
| GI_30795236-A | 105    | 105.4  | 109.6  | ABCA12    | <a href="#">NM_015657.3</a> | LI2;ICR2B;DKFZP434G232                 |             |                        |
| GI_30795236-I | 116.7  | 117.1  | 116.6  | ABCA12    | <a href="#">NM_015657.3</a> | LI2;ICR2B;DKFZP434G232                 |             |                        |
| GI_30795237-I | 85.7   | 106.1  | 98     | ABCA12    | <a href="#">NM_173076.2</a> | LI2;ICR2B;DKFZP434G232                 |             |                        |
| GI_30795239-A | 347.2  | 304.1  | 350.3  | ARNT      | <a href="#">NM_178426.1</a> | HIF1B;TANGO;HIF1BETA;HIF-1beta         | aryl        | nucleus protein-       |
| GI_30795244-S | 121.5  | 123.6  | 122.8  | GCKR      | <a href="#">NM_001486.2</a> | GKRP                                   | enzyme      | carbohydr              |
| GI_30795246-S | 191.6  | 242.9  | 196.7  | RNASEL    | <a href="#">NM_021133.2</a> | HPC1;RNS4;PRCA1                        | endoribon   | cellular_co protein    |
| GI_30795247-A | 177    | 237.6  | 161.8  | AUTL2     | <a href="#">NM_178270.1</a> | APG4A;MGC43691;dJ889M15.3              |             |                        |
| GI_30795249-I | 103    | 94.7   | 99.4   | AUTL2     | <a href="#">NM_178271.1</a> | APG4A;MGC43691;dJ889M15.3              |             |                        |
| GI_30795253-S | 164    | 181.5  | 159.7  | AUTL4     | <a href="#">NM_032885.4</a> | APG4-D;MGC15906                        |             |                        |
| GI_30795256-I | 115.6  | 133.3  | 114.4  | FBXW5     | <a href="#">NM_178225.1</a> | MGC20962;DKFZP434B205                  |             |                        |
| GI_30840979-S | 172.8  | 207.3  | 175    | NFIA      | <a href="#">NM_005595.1</a> | NFI-L;KIAA1439                         | transcripti | nucleus DNA            |
| GI_30842823-S | 197.4  | 175.8  | 158.5  | LOC133308 | <a href="#">NM_178833.2</a> |                                        | solute:hyd  | integral to regulation |
| GI_30842828-S | 113.1  | 125.6  | 111.4  | PHF12     | <a href="#">NM_020889.1</a> | PF1;KIAA1523                           | DNA         | regulation             |
| GI_30911096-S | 149.4  | 167.7  | 169.1  | PUNC      | <a href="#">NM_004884.1</a> | HsT18880                               |             | plasma cell            |
| GI_30911100-S | 880.2  | 857.8  | 814.2  | SWAP70    | <a href="#">NM_015055.1</a> | SWAP-70;KIAA0640                       | calcium     |                        |
| GI_30911102-S | 235.8  | 287.1  | 246.1  | PYGO1     | <a href="#">NM_015617.1</a> | DKFZp547G0910                          | DNA         | nucleus regulation     |
| GI_31077078-A | 155.5  | 181.3  | 158    | C20orf23  | <a href="#">NM_017683.1</a> | SNX23;KISC20ORF                        |             |                        |
| GI_31077196-S | 150.1  | 175.1  | 148.7  | SOX17     | <a href="#">NM_022454.2</a> | FLJ22252                               | DNA         | nucleus regulation     |
| GI_31077197-A | 353.7  | 390.2  | 425.4  | U1SNRNPBP | <a href="#">NM_180699.1</a> | HM-1                                   |             |                        |
| GI_31077201-S | 316.5  | 167    | 235.6  | SOX18     | <a href="#">NM_018419.2</a> | HLTS                                   | RNA         | nucleus regulation     |
| GI_31077202-A | 165.4  | 178    | 166.2  | U1SNRNPBP | <a href="#">NM_022717.2</a> | HM-1                                   |             |                        |
| GI_31077203-I | 111    | 134.4  | 101.8  | U1SNRNPBP | <a href="#">NM_007020.2</a> | HM-1                                   |             |                        |
| GI_31077208-A | 85.2   | 81.2   | 96.9   | HNF4A     | <a href="#">NM_178850.1</a> | TCF;HNF4;NR2A1;TCF14;NR2A21            | RNA         | nucleus pathogene      |
| GI_31077208-I | 176.7  | 202.9  | 189.1  | HNF4A     | <a href="#">NM_178850.1</a> | TCF;HNF4;NR2A1;TCF14;NR2A21            | RNA         | nucleus pathogene      |
| GI_31077210-A | 695.4  | 1045.8 | 448.3  | HIF1A     | <a href="#">NM_181054.1</a> | MOP1;HIF-1alpha;HIF1-ALPHA             | RNA         | nucleus response       |
| GI_31077212-I | 1313.7 | 1999.3 | 748.7  | HIF1A     | <a href="#">NM_001530.2</a> | MOP1;HIF-1alpha;HIF1-ALPHA             | RNA         | nucleus response       |
| GI_31077213-S | 174.2  | 217.8  | 192.6  | HUS1      | <a href="#">NM_004507.2</a> |                                        |             | DNA                    |
| GI_31077214-S | 116.7  | 137.4  | 106.2  | HUS1B     | <a href="#">NM_148959.2</a> |                                        |             |                        |
| GI_31083027-S | 310.9  | 352.6  | 295.4  | CCRN4L    | <a href="#">NM_012118.2</a> | NOC;CCR4;CCR4L;MGC4120817              | transcripti | nucleus transcripti    |
| GI_31083052-S | 129.1  | 145.5  | 133    | CLN8      | <a href="#">NM_018941.2</a> | EPMR                                   |             | ER-Golgi neurogene     |
| GI_31083084-A | 826.6  | 1465.8 | 1201.9 | MRPL52    | <a href="#">NM_181307.1</a> |                                        |             | extrachro              |
| GI_31083090-I | 215.5  | 256.8  | 244.4  | GOLGIN-67 | <a href="#">NM_181076.1</a> | GOLGA5                                 |             | Golgi                  |
| GI_31083098-A | 957.7  | 1492   | 1144.4 | GOLGIN-67 | <a href="#">NM_181077.1</a> | GOLGA5                                 |             | Golgi                  |
| GI_31083098-I | 102.5  | 94.8   | 93.5   | GOLGIN-67 | <a href="#">NM_181077.1</a> | GOLGA5                                 |             | Golgi                  |
| GI_31083115-S | 684    | 630.3  | 631.1  | C6orf80   | <a href="#">NM_015439.2</a> | CCRL1AP;DKFZp586D0623                  |             |                        |
| GI_31083125-S | 372.1  | 460.7  | 413.2  | COL9A2    | <a href="#">NM_001852.3</a> | MED;EDM2;DJ39G22.4                     | collagen    | microfibril skeletal   |
| GI_31083135-S | 168.5  | 192.4  | 169.7  | CYP4Z1    | <a href="#">NM_178134.2</a> |                                        | monoxyg     | electron               |

|               |        |        |        |          |                             |                                       |             |             |              |
|---------------|--------|--------|--------|----------|-----------------------------|---------------------------------------|-------------|-------------|--------------|
| GI_31083143-A | 755.1  | 439.4  | 499.7  | AXIN1    | <a href="#">NM_181050.1</a> | AXIN;MGC52315                         | GTPase      | cytoplasm   | oocyte       |
| GI_31083149-I | 132.5  | 151.3  | 142.9  | AXIN1    | <a href="#">NM_003502.2</a> | AXIN;MGC52315                         | GTPase      | cytoplasm   | oocyte       |
| GI_31083155-S | 97.4   | 100    | 98.5   | IL20RA   | <a href="#">NM_014432.2</a> | IL-20R1;ZCYTOR7                       | receptor    | integral to | blood        |
| GI_31083165-S | 98.6   | 98.1   | 93.6   | IL20     | <a href="#">NM_018724.2</a> | IL-20;IL10D;ZCYTO10                   | cytokine    | extracellul | immune       |
| GI_31083173-I | 194.4  | 248    | 241.9  | IL21R    | <a href="#">NM_181078.1</a> | NILR;MGC10967                         | receptor    | integral to | natural      |
| GI_31083179-I | 124.2  | 116.7  | 110.8  | IL21R    | <a href="#">NM_181079.1</a> | NILR;MGC10967                         | receptor    | integral to | natural      |
| GI_31083186-A | 273.5  | 389.3  | 319.5  | IL21R    | <a href="#">NM_021798.2</a> | NILR;MGC10967                         | receptor    | integral to | natural      |
| GI_31083186-I | 195    | 247.8  | 208.3  | IL21R    | <a href="#">NM_021798.2</a> | NILR;MGC10967                         | receptor    | integral to | natural      |
| GI_31083192-S | 117.1  | 147.8  | 151.4  | ADCY1    | <a href="#">NM_021116.1</a> |                                       | calcium/ca  | integral to | signal       |
| GI_31083201-S | 198.9  | 216.7  | 159.9  | APOBEC3F | <a href="#">NM_145298.3</a> | ARP8                                  | zinc ion    |             |              |
| GI_31083218-A | 156.3  | 188    | 165.3  | NFYA     | <a href="#">NM_021705.2</a> | HAP2;CBF-A;CBF-B;NF-YA                | transcripti | nucleus     | transcripti  |
| GI_31083227-I | 102.2  | 104    | 102.8  | NFYA     | <a href="#">NM_002505.3</a> | HAP2;CBF-A;CBF-B;NF-YA                | transcripti | nucleus     | transcripti  |
| GI_31083242-I | 94.4   | 103.3  | 94.5   | PPP2R5C  | <a href="#">NM_178587.1</a> | B56G;MGC23064                         | protein     | protein     | signal       |
| GI_31083249-A | 694.8  | 827.3  | 659.9  | PPP2R5C  | <a href="#">NM_178588.1</a> | B56G;MGC23064                         | protein     | protein     | signal       |
| GI_31083249-I | 122.7  | 120    | 108.1  | PPP2R5C  | <a href="#">NM_178588.1</a> | B56G;MGC23064                         | protein     | protein     | signal       |
| GI_31083258-I | 117.9  | 108.9  | 99.8   | PPP2R5C  | <a href="#">NM_002719.2</a> | B56G;MGC23064                         | protein     | protein     | signal       |
| GI_31083266-I | 117.7  | 152.7  | 146.4  | PPP2R5D  | <a href="#">NM_006245.2</a> | MGC2134;MGC8949                       | protein     | protein     | neurogene    |
| GI_31083287-A | 312.4  | 387.1  | 417.7  | PPP2R5D  | <a href="#">NM_180977.1</a> | MGC2134;MGC8949                       | protein     | protein     | neurogene    |
| GI_31083295-S | 363.5  | 414.9  | 415    | PPP2R5E  | <a href="#">NM_006246.2</a> |                                       | protein     | protein     | signal       |
| GI_31083305-S | 77.9   | 85.4   | 80.2   | FIBL-6   | <a href="#">NM_031935.1</a> | FBLN6                                 |             |             |              |
| GI_31083314-S | 102.5  | 99.4   | 104.4  | GPR45    | <a href="#">NM_007227.3</a> | PSP24A;PSP24(ALPHA)                   | G-protein   | integral to | G-protein    |
| GI_31083343-S | 99.4   | 252.8  | 443.8  | CMKOR1   | <a href="#">NM_020311.1</a> | RDC1;GPR159                           | G-protein   | integral to | G-protein    |
| GI_31083366-S | 569.4  | 692.8  | 669    | SEC8L1   | <a href="#">NM_021807.2</a> | REC8;SEC8;EXOC4;Sec8p;KIAA1699;MGC2   | protein     | kinesin     | intracellula |
| GI_31088849-S | 192.7  | 227    | 203.2  | TMSL6    | <a href="#">NM_181428.1</a> | TMSB4L;dJ1071L10.1                    | actin       | cytoplasm   | cytoskelet   |
| GI_31088851-S | 97.8   | 97.8   | 98.2   | hT2R55   | <a href="#">NM_181429.1</a> |                                       |             |             |              |
| GI_31088867-S | 1552.4 | 1300.3 | 1535.7 | FLJ23476 | <a href="#">NM_024640.2</a> | YRDC                                  | molecular   |             |              |
| GI_31317208-A | 623.7  | 574.2  | 477.8  | BTBD3    | <a href="#">NM_181443.1</a> | KIAA0952;dJ742J24.1                   | protein     |             |              |
| GI_31317208-I | 98.3   | 91.2   | 100.9  | BTBD3    | <a href="#">NM_181443.1</a> | KIAA0952;dJ742J24.1                   | protein     |             |              |
| GI_31317210-I | 105    | 114.8  | 106.5  | BTBD3    | <a href="#">NM_014962.2</a> | KIAA0952;dJ742J24.1                   | protein     |             |              |
| GI_31317211-I | 1108.9 | 1247.8 | 1297.2 | ANKFY1   | <a href="#">NM_016376.2</a> | ANKHZN;ZFYVE14;KIAA1255               | protein     |             |              |
| GI_31317213-I | 213.7  | 246.9  | 208.6  | ARHGAP8  | <a href="#">NM_015366.2</a> | PP610;BPGAP1;FLJ20185                 | GTPase      |             |              |
| GI_31317215-I | 82.4   | 93.1   | 87.4   | ARHGAP8  | <a href="#">NM_017701.2</a> | PP610;BPGAP1;FLJ20185                 | GTPase      |             |              |
| GI_31317217-I | 123.6  | 136.6  | 120.7  | ARHGAP8  | <a href="#">NM_181333.1</a> | PP610;BPGAP1;FLJ20185                 | GTPase      |             |              |
| GI_31317219-I | 153    | 212.2  | 178.2  | ARHGAP8  | <a href="#">NM_181334.1</a> | PP610;BPGAP1;FLJ20185                 | GTPase      |             |              |
| GI_31317221-A | 114.5  | 104.1  | 104.1  | ARHGAP8  | <a href="#">NM_181335.1</a> | PP610;BPGAP1;FLJ20185                 | GTPase      |             |              |
| GI_31317223-S | 203.1  | 349.7  | 337.3  | EDIL3    | <a href="#">NM_005711.3</a> | DEL1;MGC26287                         | integrin    |             | cell         |
| GI_31317225-S | 214.1  | 268.4  | 196    | EFNB1    | <a href="#">NM_004429.3</a> | EFL3;EPLG2;LERK2;MGC8782              | transmem    | soluble     | cell         |
| GI_31317226-S | 845    | 824    | 1548.2 | EGR1     | <a href="#">NM_001964.2</a> | TIS8;AT225;NGFI-A;ZNF225;KROX-24;ZIF- | DNA         | nucleus     | regulation   |
| GI_31317227-S | 91.3   | 101.9  | 85.3   | EGR3     | <a href="#">NM_004430.2</a> | PILOT                                 | transcripti | nucleus     | circadian    |
| GI_31317229-S | 103.8  | 99     | 102.5  | FCER1A   | <a href="#">NM_002001.2</a> | FCE1A;FcERI                           | receptor    | integral to | immune       |
| GI_31317230-A | 186.8  | 287    | 112.8  | FKBP7    | <a href="#">NM_181342.1</a> | FKBP23;PPIase;MGC9420                 | cyclophilin | endoplas    | protein      |
| GI_31317232-I | 103.6  | 112.2  | 111.3  | FKBP7    | <a href="#">NM_016105.2</a> | FKBP23;PPIase;MGC9420                 | cyclophilin | endoplas    | protein      |
| GI_31317233-A | 116.3  | 131.6  | 124.9  | FRAT1    | <a href="#">NM_181355.1</a> |                                       |             |             | oncogene     |
| GI_31317235-I | 120.6  | 116.9  | 125.3  | FRAT1    | <a href="#">NM_005479.2</a> |                                       |             |             | oncogene     |



|               |        |        |        |             |                             |                                      |              |              |             |
|---------------|--------|--------|--------|-------------|-----------------------------|--------------------------------------|--------------|--------------|-------------|
| GI_31317237-S | 489    | 526.7  | 578.6  | FRAT2       | <a href="#">NM_012083.2</a> | MGC10562                             | molecular    | cellular_co  | developm    |
| GI_31317238-S | 96.7   | 115.3  | 102.9  | IL22RA1     | <a href="#">NM_021258.2</a> | IL22R;CRF2-9                         | receptor     | membran      |             |
| GI_31317242-A | 149.8  | 154.1  | 138    | IL22RA2     | <a href="#">NM_181310.1</a> | CRF2X;CRF2-10;CRF2-S1;IL-22BP        |              |              |             |
| GI_31317244-I | 88.1   | 102.2  | 94     | IL22RA2     | <a href="#">NM_052962.2</a> | CRF2X;CRF2-10;CRF2-S1;IL-22BP        |              |              |             |
| GI_31317245-A | 181    | 233.1  | 190.1  | IL24        | <a href="#">NM_181339.1</a> | C49A;FISP;MDA7;ST16;IL-24;IL10B;Mob- | tumor        | extracellul  | apoptosis   |
| GI_31317247-I | 181.1  | 221.2  | 164.3  | IL24        | <a href="#">NM_006850.2</a> | C49A;FISP;MDA7;ST16;IL-24;IL10B;Mob- | tumor        | extracellul  | apoptosis   |
| GI_31317248-A | 101.5  | 110.7  | 94.9   | IL6R        | <a href="#">NM_181359.1</a> | CD126;IL6RA;IL-6R-1;IL-6R-alpha      | interleukin- | interleukin- | cell growth |
| GI_31317250-I | 126.2  | 149.7  | 140.4  | IL6R        | <a href="#">NM_000565.2</a> | CD126;IL6RA;IL-6R-1;IL-6R-alpha      | interleukin- | interleukin- | cell growth |
| GI_31317251-A | 108.4  | 101.2  | 107.9  | ANKFY1      | <a href="#">NM_020740.1</a> | ANKHZN;ZFYVE14;KIAA1255              | protein      |              |             |
| GI_31317251-I | 104.5  | 95.5   | 99.9   | ANKFY1      | <a href="#">NM_020740.1</a> | ANKHZN;ZFYVE14;KIAA1255              | protein      |              |             |
| GI_31317253-S | 132    | 119    | 113.4  | NLGN1       | <a href="#">NM_014932.2</a> | KIAA1070;MGC45115                    | neuroligin   | membran      | cell        |
| GI_31317254-S | 707.6  | 777.4  | 771    | NLGN2       | <a href="#">NM_020795.2</a> | KIAA1366                             | hydrolase    | membran      | cell        |
| GI_31317255-A | 261.4  | 108.9  | 137.3  | NLGN4       | <a href="#">NM_181332.1</a> | HLNX;HNLX;NLGN;KIAA1260;MGC22376     | neuroligin   | membran      | cell        |
| GI_31317255-I | 125.1  | 140.9  | 127.6  | NLGN4       | <a href="#">NM_181332.1</a> | HLNX;HNLX;NLGN;KIAA1260;MGC22376     | neuroligin   | membran      | cell        |
| GI_31317257-I | 151.2  | 167    | 146.8  | NLGN4       | <a href="#">NM_020742.2</a> | HLNX;HNLX;NLGN;KIAA1260;MGC22376     | neuroligin   | membran      | cell        |
| GI_31317262-A | 436.9  | 370    | 401.9  | TAZ         | <a href="#">NM_181313.1</a> | EFE;BTHS;EFE2;G4.5;CMD3A;XAP-2       |              |              | heart       |
| GI_31317264-I | 725.6  | 926.4  | 833.6  | TAZ         | <a href="#">NM_181314.1</a> | EFE;BTHS;EFE2;G4.5;CMD3A;XAP-2       |              |              | heart       |
| GI_31317267-A | 156.8  | 182.6  | 158.3  | WDFY3       | <a href="#">NM_178583.1</a> | ALFY;ZFYVE25;KIAA0993;MGC16461       |              |              |             |
| GI_31317267-I | 119.7  | 142.7  | 126.9  | WDFY3       | <a href="#">NM_178583.1</a> | ALFY;ZFYVE25;KIAA0993;MGC16461       |              |              |             |
| GI_31317269-I | 133.1  | 129.6  | 122.8  | WDFY3       | <a href="#">NM_178585.1</a> | ALFY;ZFYVE25;KIAA0993;MGC16461       |              |              |             |
| GI_31317271-I | 135.6  | 166.3  | 169.6  | WDFY3       | <a href="#">NM_014991.3</a> | ALFY;ZFYVE25;KIAA0993;MGC16461       |              |              |             |
| GI_31317273-I | 417.1  | 375.2  | 368.9  | WDR20       | <a href="#">NM_181291.1</a> | DMR;FLJ33659;MGC33177;MGC33183       |              |              |             |
| GI_31317275-A | 242.2  | 260.8  | 240.1  | WDR20       | <a href="#">NM_181302.1</a> | DMR;FLJ33659;MGC33177;MGC33183       |              |              |             |
| GI_31317281-A | 108.8  | 107.5  | 109    | WDR17       | <a href="#">NM_181265.1</a> |                                      |              |              |             |
| GI_31317281-I | 93.3   | 97.2   | 93.4   | WDR17       | <a href="#">NM_181265.1</a> |                                      |              |              |             |
| GI_31317285-A | 370.1  | 555.8  | 329    | WDR21       | <a href="#">NM_181341.1</a> | MGC20547;MGC46524;DKFZp434K114       |              |              |             |
| GI_31317289-A | 345.3  | 337.3  | 414.5  | SMURF1      | <a href="#">NM_181349.1</a> |                                      | protein      | intracellula | ubiquitin   |
| GI_31317291-I | 119    | 123.7  | 100.9  | SMURF1      | <a href="#">NM_020429.1</a> |                                      | protein      | intracellula | ubiquitin   |
| GI_31317293-A | 117.4  | 110.6  | 109.6  | KCNMB2      | <a href="#">NM_005832.3</a> | MGC22431                             | ion          | membran      | potassium   |
| GI_31317293-I | 141    | 155.2  | 164.5  | KCNMB2      | <a href="#">NM_005832.3</a> | MGC22431                             | ion          | membran      | potassium   |
| GI_31317294-I | 80.1   | 83.8   | 70.5   | KCNMB2      | <a href="#">NM_181361.1</a> | MGC22431                             | ion          | membran      | potassium   |
| GI_31317296-I | 122.7  | 152.2  | 137.4  | ID1         | <a href="#">NM_181353.1</a> | ID                                   |              | nucleus      | regulation  |
| GI_31317298-A | 513.1  | 1001.2 | 1097.3 | ID1         | <a href="#">NM_002165.2</a> | ID                                   |              | nucleus      | regulation  |
| GI_31317300-S | 101.5  | 108.4  | 111.2  | CAPON       | <a href="#">NM_014697.1</a> | KIAA0464                             |              |              |             |
| GI_31317302-S | 202.5  | 230.9  | 208.3  | HSPA12B     | <a href="#">NM_052970.3</a> | C20orf60;FLJ32150;dJ1009E24.2        | ATP          |              |             |
| GI_31317304-S | 793.7  | 832.5  | 680.4  | MPHOSPH10   | <a href="#">NM_005791.1</a> | MPP10;MPP10P                         | cell cycle   | nucleolus    | M phase     |
| GI_31317306-S | 111.8  | 96     | 107.9  | PCSK9       | <a href="#">NM_174936.2</a> | FH3;NARC1;HCHOLA3                    | subtilase    |              | proteolysis |
| GI_31317308-S | 302.3  | 389.5  | 293    | PIP5K1C     | <a href="#">NM_012398.1</a> | KIAA0589;PIP5Kgamma;PIP5K-GAMMA      | 1-           |              |             |
| GI_31317310-I | 119.5  | 121.8  | 131.6  | WDR17       | <a href="#">NM_170710.2</a> |                                      |              |              |             |
| GI_31324529-S | 128.6  | 162    | 152.1  | IREM2       | <a href="#">NM_181449.1</a> |                                      | receptor     |              |             |
| GI_31324542-S | 3338.1 | 2924.6 | 4123.1 | CaMKIIalpha | <a href="#">NM_018584.4</a> | PRO1489;MGC22256                     |              |              |             |
| GI_31324576-S | 102.8  | 104.9  | 103.9  | MIRAB13     | <a href="#">NM_033386.1</a> | KIAA1668;bA395L14.2                  | zinc ion     | intracellula | vesicle-    |
| GI_31340555-S | 131.9  | 143.3  | 130.4  | cig5        | <a href="#">NM_080657.3</a> | vig1                                 |              |              |             |
| GI_31340570-S | 99.8   | 101.5  | 81.9   | DACH2       | <a href="#">NM_053281.2</a> | FLJ31391                             |              | nucleus      | cell growth |

|               |        |        |        |            |                             |                               |             |              |              |
|---------------|--------|--------|--------|------------|-----------------------------|-------------------------------|-------------|--------------|--------------|
| GI_31340578-S | 132.7  | 142.1  | 146.1  | DKFZp434B2 | <a href="#">NM_032263.2</a> | FLJ11667;FLJ23571             |             |              |              |
| GI_31340581-S | 153.7  | 166.2  | 156.5  | NEUROG2    | <a href="#">NM_024019.2</a> | Atoh4;ngn-2;Math4A;MGC46562   | DNA         | nucleus      | regulation   |
| GI_31340617-S | 2076.5 | 2163.5 | 2030.9 | PRKDC      | <a href="#">NM_006904.6</a> | p350;DNAPK;DNP1K1;HYRC1;XRCC7 | protein     | nucleus      | double-      |
| GI_31340618-S | 104.7  | 118.4  | 114.4  | ZNF70      | <a href="#">NM_021916.2</a> | Cos17;MGC48959                | transcripti | nucleus      | regulation   |
| GI_31340687-S | 351.1  | 370.3  | 338.7  | LOC352909  | <a href="#">NM_178837.2</a> |                               |             |              |              |
| GI_31340688-S | 282.5  | 326.8  | 290.8  | GATS       | <a href="#">NM_178831.2</a> |                               |             |              |              |
| GI_31340712-S | 291.4  | 370.9  | 333.9  | LRRTM1     | <a href="#">NM_178839.2</a> |                               |             | integral to  |              |
| GI_31340713-S | 1990.3 | 1312.9 | 202.2  | TDE2L      | <a href="#">NM_178865.2</a> | TDE2;FKSG84;PRO0899           |             | membran      |              |
| GI_31340718-S | 95.2   | 90.8   | 90.5   | MGC51025   | <a href="#">NM_178571.2</a> |                               |             |              |              |
| GI_31340723-S | 276.6  | 270.4  | 299.9  | CEI        | <a href="#">NM_178569.2</a> |                               |             |              |              |
| GI_31340828-S | 103.1  | 102.4  | 97.9   | FLJ30435   | <a href="#">NM_174950.2</a> |                               |             |              |              |
| GI_31340935-S | 136.7  | 160.6  | 150.8  | LGICZ      | <a href="#">NM_180990.2</a> | ZAC                           | extracellul | membran      | transport    |
| GI_31341089-S | 432.9  | 527    | 429.3  | PDZK8      | <a href="#">NM_173791.2</a> | bA129M16.2                    | protein     |              | intracellula |
| GI_31341095-S | 477.1  | 358.2  | 321.5  | LOC128977  | <a href="#">NM_173793.2</a> |                               |             |              |              |
| GI_31341096-S | 324.4  | 362.3  | 276.9  | FUNDC1     | <a href="#">NM_173794.2</a> | MGC51029                      |             |              |              |
| GI_31341099-S | 222.2  | 242.5  | 213.3  | FLJ32096   | <a href="#">NM_173795.2</a> |                               |             |              |              |
| GI_31341100-S | 114.7  | 105.5  | 110.1  | MGC24125   | <a href="#">NM_173796.2</a> |                               |             |              |              |
| GI_31341107-S | 1191.1 | 1339.4 | 1162.4 | FLJ38499   | <a href="#">NM_173797.2</a> |                               | nucleic     |              |              |
| GI_31341108-S | 142.4  | 178.2  | 169    | LOC170261  | <a href="#">NM_173798.2</a> |                               | nucleic     | nucleus      | regulation   |
| GI_31341110-S | 104.6  | 109.7  | 99.2   | FLJ39873   | <a href="#">NM_173799.2</a> |                               |             |              |              |
| GI_31341111-S | 95.4   | 102.5  | 95.6   | FLJ90650   | <a href="#">NM_173800.2</a> |                               |             |              |              |
| GI_31341117-S | 90.8   | 98.2   | 95.1   | MGC50559   | <a href="#">NM_173802.2</a> |                               | S-          |              |              |
| GI_31341119-S | 121.5  | 145.6  | 110.3  | IFNT1      | <a href="#">NM_176891.2</a> |                               | hematopoi   | extracellul  | defense      |
| GI_31341122-S | 145.5  | 161.7  | 154.1  | FLJ39599   | <a href="#">NM_173803.2</a> |                               |             |              |              |
| GI_31341123-S | 128    | 156.3  | 154.2  | FLJ38723   | <a href="#">NM_173805.2</a> |                               |             |              |              |
| GI_31341127-S | 105.7  | 108.6  | 89     | MGC50721   | <a href="#">NM_173806.2</a> |                               |             |              |              |
| GI_31341128-S | 143.5  | 155.8  | 143.3  | MGC33370   | <a href="#">NM_173807.2</a> |                               |             |              |              |
| GI_31341135-S | 312.8  | 331.2  | 310.4  | FLJ32675   | <a href="#">NM_173811.2</a> |                               |             |              |              |
| GI_31341139-S | 87.3   | 103.2  | 94     | FLJ34154   | <a href="#">NM_173813.2</a> |                               |             |              |              |
| GI_31341145-S | 1945.2 | 1634.2 | 1730.4 | MGC8902    | <a href="#">NM_173638.2</a> |                               | DNA         | nucleus      | regulation   |
| GI_31341149-S | 160    | 155.3  | 130.4  | FLJ36754   | <a href="#">NM_173829.2</a> |                               | nucleic     |              |              |
| GI_31341152-S | 145    | 148.2  | 140.3  | LOC286075  | <a href="#">NM_173831.2</a> |                               | nucleic     | intracellula | regulation   |
| GI_31341155-S | 169.5  | 196    | 175.4  | FLJ38705   | <a href="#">NM_173832.2</a> | FLJ00028                      | DNA         | nucleus      | regulation   |
| GI_31341156-S | 106.3  | 111.6  | 108.1  | MGC45780   | <a href="#">NM_173833.2</a> |                               |             |              |              |
| GI_31341159-S | 645.8  | 780.7  | 829    | MGC21416   | <a href="#">NM_173834.2</a> |                               |             |              |              |
| GI_31341185-S | 93.7   | 110.3  | 78.4   | SPACA3     | <a href="#">NM_173847.2</a> | SLLP1;ALLP17                  | lysozyme    | extracellul  | cell wall    |
| GI_31341191-S | 121.2  | 132.1  | 103.5  | OL-64      | <a href="#">NM_173850.2</a> |                               | serine      |              |              |
| GI_31341192-S | 110.4  | 124.9  | 117.5  | S100A15    | <a href="#">NM_176823.2</a> | S100A7a;S100A7f;S100A7L1      | calcium     |              |              |
| GI_31341196-S | 1295.5 | 1104.8 | 1016.3 | KRTCAP2    | <a href="#">NM_173852.2</a> | KCP2                          |             |              |              |
| GI_31341197-S | 112.4  | 104    | 109.5  | KRTCAP3    | <a href="#">NM_173853.2</a> | KCP3                          |             |              |              |
| GI_31341205-S | 87.4   | 106.2  | 96.5   | LOC283385  | <a href="#">NM_173855.2</a> |                               |             |              |              |
| GI_31341213-S | 144.6  | 149.6  | 126.8  | LOC200895  | <a href="#">NM_176815.2</a> |                               | dihydrofol  |              | nucleotide   |
| GI_31341214-S | 102.3  | 97.6   | 101.5  | KENAE      | <a href="#">NM_176816.2</a> |                               |             |              |              |
| GI_31341259-S | 125.2  | 113.8  | 109.7  | TMEM16D    | <a href="#">NM_178826.2</a> | FLJ34221;FLJ34272;FLJ35277    |             |              |              |

|               |        |        |       |           |                             |                                    |             |                        |
|---------------|--------|--------|-------|-----------|-----------------------------|------------------------------------|-------------|------------------------|
| GI_31341260-S | 105.1  | 107.5  | 104.6 | OSTbeta   | <a href="#">NM_178859.2</a> |                                    |             |                        |
| GI_31341282-S | 207.3  | 246.1  | 212.4 | K6IRS3    | <a href="#">NM_175068.2</a> | KRT6IRS3                           |             |                        |
| GI_31341283-S | 126    | 147.3  | 142.1 | INM01     | <a href="#">NM_175075.2</a> |                                    |             |                        |
| GI_31341302-S | 470.5  | 474.8  | 379.5 | JAZF1     | <a href="#">NM_175061.2</a> | DKFZp761K2222                      | nucleus     | cell growth            |
| GI_31341312-S | 101.4  | 92.6   | 86    | K6IRS4    | <a href="#">NM_175053.2</a> | KRT5C;KRT6IRS4                     |             |                        |
| GI_31341313-S | 113.5  | 133.7  | 121.6 | LOC144100 | <a href="#">NM_175058.2</a> |                                    |             |                        |
| GI_31341319-S | 143.8  | 172.8  | 141.2 | SEZ6      | <a href="#">NM_178860.2</a> |                                    |             |                        |
| GI_31341340-S | 1382.6 | 913.9  | 813.7 | LOC91942  | <a href="#">NM_174889.2</a> |                                    |             |                        |
| GI_31341349-S | 411.8  | 502.1  | 528.9 | C14orf79  | <a href="#">NM_174891.2</a> |                                    |             |                        |
| GI_31341350-S | 165.3  | 201.8  | 168.5 | MGC24133  | <a href="#">NM_174896.2</a> |                                    |             |                        |
| GI_31341354-S | 85.9   | 81     | 91.7  | FAM9C     | <a href="#">NM_174901.2</a> |                                    | nucleus     |                        |
| GI_31341355-S | 360.3  | 267.6  | 221.5 | LOC143458 | <a href="#">NM_174902.2</a> |                                    |             |                        |
| GI_31341368-S | 228.3  | 270.1  | 235.7 | LOC167127 | <a href="#">NM_174914.2</a> |                                    | transferas  | metabolis              |
| GI_31341376-S | 197.2  | 206.1  | 181   | FLJ36888  | <a href="#">NM_178830.2</a> |                                    |             |                        |
| GI_31341380-S | 154.8  | 199.6  | 168.4 | LOC201191 | <a href="#">NM_174920.2</a> |                                    |             |                        |
| GI_31341385-S | 520.1  | 514.8  | 507.3 | PMS2L5    | <a href="#">NM_174930.2</a> | PMS7;MGC34222                      | damaged     | cellular_co mismatch   |
| GI_31341399-S | 101.9  | 108.7  | 95.5  | MGC39681  | <a href="#">NM_174939.2</a> |                                    |             |                        |
| GI_31341400-S | 168.5  | 252.9  | 242.5 | M160      | <a href="#">NM_174941.2</a> | CD163B                             | protein-    | membran                |
| GI_31341411-S | 108.2  | 109.4  | 113.3 | FLJ25976  | <a href="#">NM_174943.2</a> |                                    |             |                        |
| GI_31341423-S | 120.4  | 137.4  | 123.9 | AP1S3     | <a href="#">NM_178814.2</a> |                                    | protein     | Golgi endocytosi       |
| GI_31341424-S | 129.5  | 131.9  | 133.2 | C7orf34   | <a href="#">NM_178829.2</a> | ctm-1                              |             |                        |
| GI_31341428-S | 986.3  | 885.3  | 761   | LEMD2     | <a href="#">NM_181336.2</a> | dJ482C21.1                         |             | nuclear                |
| GI_31341468-S | 107.4  | 120.1  | 109.1 | ARL8      | <a href="#">NM_178815.2</a> |                                    | small       | small                  |
| GI_31341469-S | 607.7  | 677    | 624   | KCTD13    | <a href="#">NM_178863.2</a> | PDIP1;FKSG86;POLDIP1               | voltage-    | membran potassium      |
| GI_31341470-S | 94     | 95.8   | 87    | CASC2     | <a href="#">NM_178816.2</a> |                                    |             |                        |
| GI_31341471-S | 105.3  | 111.4  | 97    | NXF       | <a href="#">NM_178864.2</a> |                                    | signal      | signal                 |
| GI_31341477-S | 95.8   | 92.3   | 91.9  | LASS3     | <a href="#">NM_178842.2</a> | MGC27091                           | transcripti | nucleus regulation     |
| GI_31341566-S | 910.8  | 1130.9 | 179.4 | GJB2      | <a href="#">NM_004004.2</a> | HID;KID;PPK;CX26;DFNA3;DFNB1;NSRD1 | connexon    | connexon hearing       |
| GI_31341670-S | 102.3  | 122.6  | 130.6 | ZDHHC21   | <a href="#">NM_178566.2</a> |                                    | zinc ion    | integral to regulation |
| GI_31341671-S | 102.5  | 118.8  | 119.5 | MGC42638  | <a href="#">NM_178567.2</a> |                                    | ubiquitin   | ubiquitin              |
| GI_31341675-S | 95.5   | 126    | 110   | MGC50831  | <a href="#">NM_175924.2</a> |                                    | phospholi   | lipid                  |
| GI_31341683-S | 210.1  | 249.5  | 297.7 | LOC340371 | <a href="#">NM_178564.2</a> |                                    | ATP         | protein                |
| GI_31341688-S | 206.3  | 238.6  | 211.9 | MGC35308  | <a href="#">NM_175922.2</a> |                                    | DNA         | nucleus regulation     |
| GI_31341689-S | 158.5  | 198.2  | 176.1 | MGC42630  | <a href="#">NM_175923.2</a> |                                    |             |                        |
| GI_31341691-S | 718.5  | 509.5  | 444   | C10orf83  | <a href="#">NM_178832.2</a> | bA548K23.4                         |             |                        |
| GI_31341698-S | 122.9  | 137.7  | 123.4 | MGC50844  | <a href="#">NM_178562.2</a> |                                    |             | integral to            |
| GI_31341703-S | 120.2  | 122    | 133.7 | FLJ90430  | <a href="#">NM_178558.2</a> |                                    | electron    | nucleus electron       |
| GI_31341708-S | 143.1  | 149.8  | 142.6 | FLJ37478  | <a href="#">NM_178557.2</a> |                                    | N-          |                        |
| GI_31341712-S | 94.4   | 107.2  | 93.1  | MGC35206  | <a href="#">NM_178552.2</a> |                                    |             |                        |
| GI_31341713-S | 184.3  | 207.3  | 190.6 | MGC44505  | <a href="#">NM_178553.2</a> |                                    |             |                        |
| GI_31341723-S | 94.5   | 85.7   | 89.8  | MGC42493  | <a href="#">NM_178549.2</a> |                                    |             |                        |
| GI_31341724-S | 132.2  | 255.3  | 150.5 | MGC48998  | <a href="#">NM_178550.2</a> |                                    |             |                        |
| GI_31341729-S | 481.9  | 541.3  | 395.3 | ARCH      | <a href="#">NM_178547.2</a> |                                    |             |                        |
| GI_31341730-S | 146.1  | 144.4  | 120.4 | AP2E      | <a href="#">NM_178548.2</a> | MGC49007                           | transcripti | nucleus regulation     |

|               |        |        |        |            |                             |                       |                    |                         |
|---------------|--------|--------|--------|------------|-----------------------------|-----------------------|--------------------|-------------------------|
| GI_31341734-S | 136.4  | 132.4  | 120.6  | LOC339456  | <a href="#">NM_178545.2</a> |                       |                    |                         |
| GI_31341735-S | 127.3  | 134.8  | 132.6  | LOC339483  | <a href="#">NM_178546.2</a> |                       |                    |                         |
| GI_31341741-S | 235.7  | 264    | 249.1  | ZNF546     | <a href="#">NM_178544.2</a> | MGC43537              | nucleic            | intracellula regulation |
| GI_31341752-S | 137.2  | 134.1  | 123.9  | MGC48915   | <a href="#">NM_178540.2</a> |                       |                    |                         |
| GI_31341753-S | 296.8  | 364.1  | 339.5  | DKFZp762C2 | <a href="#">NM_178542.2</a> |                       |                    |                         |
| GI_31341765-S | 270.4  | 344.1  | 374.5  | LOC338799  | <a href="#">NM_178538.2</a> |                       |                    |                         |
| GI_31341766-S | 95     | 91.5   | 96     | TAFA2      | <a href="#">NM_178539.2</a> | DKFZp761E1217         |                    |                         |
| GI_31341771-S | 99.8   | 107    | 101.4  | MGC48935   | <a href="#">NM_178536.2</a> |                       | prostaglan         | transport               |
| GI_31341776-S | 696.9  | 801.7  | 699.3  | FLJ37940   | <a href="#">NM_178534.2</a> |                       |                    |                         |
| GI_31341777-S | 106.9  | 128.2  | 126.3  | LOC286103  | <a href="#">NM_178535.2</a> |                       |                    |                         |
| GI_31341781-S | 113.4  | 121.6  | 95.2   | LOC285671  | <a href="#">NM_178532.2</a> |                       |                    |                         |
| GI_31341793-S | 149.5  | 170.4  | 153.1  | FLJ40473   | <a href="#">NM_178531.2</a> |                       |                    |                         |
| GI_31341794-I | 126.6  | 153.7  | 133.8  | C1QTNF3    | <a href="#">NM_181435.2</a> | CTRP3;CORS26;FLJ37576 |                    | microfibril             |
| GI_31341799-S | 129.8  | 165.5  | 201.4  | FLJ39485   | <a href="#">NM_175920.2</a> |                       |                    |                         |
| GI_31341800-S | 1116.2 | 938.7  | 1016.3 | LOC285636  | <a href="#">NM_175921.2</a> |                       |                    |                         |
| GI_31341814-S | 102.6  | 102.8  | 90.8   | MGC40574   | <a href="#">NM_178529.2</a> |                       |                    |                         |
| GI_31341815-S | 133    | 135.9  | 132.6  | FLJ38379   | <a href="#">NM_178530.2</a> |                       |                    |                         |
| GI_31341818-S | 124.1  | 121.7  | 111.8  | MGC43026   | <a href="#">NM_178527.2</a> |                       | cation             | integral to cation      |
| GI_31341819-S | 96.3   | 106.1  | 118.9  | FLJ38773   | <a href="#">NM_178528.2</a> |                       |                    |                         |
| GI_31341824-S | 176.4  | 165.6  | 175.9  | MGC45556   | <a href="#">NM_178523.2</a> |                       |                    |                         |
| GI_31341825-S | 133.7  | 145.8  | 140.5  | MGC33407   | <a href="#">NM_178525.2</a> |                       | N-                 | actin DNA               |
| GI_31341830-S | 178.3  | 193.7  | 177.6  | FLJ38792   | <a href="#">NM_178520.2</a> |                       |                    |                         |
| GI_31341831-S | 104    | 113.9  | 106.8  | FLJ39005   | <a href="#">NM_178521.2</a> |                       |                    |                         |
| GI_31341836-S | 128.8  | 144.7  | 128.3  | FLJ36878   | <a href="#">NM_178518.2</a> |                       |                    |                         |
| GI_31341837-S | 191.2  | 232.3  | 196.6  | FLJ39421   | <a href="#">NM_178519.2</a> |                       |                    |                         |
| GI_31341844-S | 279    | 394.3  | 391.8  | LOC283849  | <a href="#">NM_178516.2</a> |                       |                    |                         |
| GI_31341845-S | 422    | 517.1  | 567.9  | PIGW       | <a href="#">NM_178517.2</a> | Gwt1;FLJ37433         |                    |                         |
| GI_31341849-S | 168.5  | 177.3  | 138.7  | LOC283487  | <a href="#">NM_178514.2</a> |                       |                    |                         |
| GI_31341850-S | 110.6  | 115    | 112.7  | FLJ37307   | <a href="#">NM_178515.2</a> |                       |                    |                         |
| GI_31341857-S | 211.9  | 206    | 197    | FLJ37201   | <a href="#">NM_178512.2</a> |                       |                    |                         |
| GI_31341858-S | 120.1  | 114.3  | 108.8  | FLJ38690   | <a href="#">NM_178513.2</a> |                       |                    |                         |
| GI_31341865-S | 1548.5 | 1084.1 | 1228.6 | LOC255783  | <a href="#">NM_178511.2</a> |                       |                    |                         |
| GI_31341870-S | 401    | 389.3  | 343.3  | FLJ34443   | <a href="#">NM_175918.2</a> |                       |                    |                         |
| GI_31341871-S | 112.8  | 116.5  | 129.1  | FLJ90723   | <a href="#">NM_175919.2</a> |                       |                    |                         |
| GI_31341881-S | 5061   | 3699.2 | 5575.3 | MGC57858   | <a href="#">NM_178508.2</a> |                       |                    |                         |
| GI_31341888-S | 1939.1 | 2317.6 | 1928.1 | NS5ATP13TF | <a href="#">NM_178507.2</a> | MGC52117              |                    |                         |
| GI_31341894-S | 95.1   | 85.2   | 80.7   | MGC35010   | <a href="#">NM_178505.2</a> |                       |                    |                         |
| GI_31341899-S | 2207.7 | 2110   | 2596.3 | DTX3       | <a href="#">NM_178502.2</a> | RNF154;FLJ34766       |                    |                         |
| GI_31341900-S | 239.5  | 274.6  | 262.7  | FLJ40542   | <a href="#">NM_178503.2</a> |                       |                    |                         |
| GI_31341905-S | 94.5   | 95.6   | 96.4   | FLJ40434   | <a href="#">NM_178501.2</a> |                       |                    |                         |
| GI_31341910-S | 444.4  | 506.1  | 460.5  | MGC39827   | <a href="#">NM_178499.2</a> |                       |                    |                         |
| GI_31341911-S | 264.9  | 322.8  | 312.2  | PHOSPHO1   | <a href="#">NM_178500.2</a> |                       |                    |                         |
| GI_31341915-S | 100.5  | 106.7  | 108.6  | FLJ23657   | <a href="#">NM_178497.2</a> |                       |                    |                         |
| GI_31341916-S | 99.5   | 113.2  | 105.9  | MGC52019   | <a href="#">NM_178498.2</a> |                       | transporte membran | transport               |

|               |        |        |        |           |                             |                       |             |                       |
|---------------|--------|--------|--------|-----------|-----------------------------|-----------------------|-------------|-----------------------|
| GI_31341922-S | 351    | 500.6  | 503.1  | LOC151963 | <a href="#">NM_178496.2</a> |                       |             |                       |
| GI_31341935-S | 103.4  | 99.9   | 92.7   | FLJ40125  | <a href="#">NM_178494.2</a> |                       | catalytic   | nucleus regulation    |
| GI_31341936-S | 106.9  | 107.1  | 95.5   | MGC24047  | <a href="#">NM_178840.2</a> |                       |             |                       |
| GI_31341942-S | 106.6  | 109.5  | 121.1  | KIAA1892L | <a href="#">NM_178470.2</a> |                       |             |                       |
| GI_31341948-S | 107.6  | 116.9  | 115.7  | MGC52282  | <a href="#">NM_178453.2</a> |                       | trypsin     | proteolysis           |
| GI_31341949-S | 98.8   | 95.5   | 98.5   | LOC138307 | <a href="#">NM_178469.2</a> |                       |             |                       |
| GI_31341954-S | 105    | 95     | 99.2   | ZMYND17   | <a href="#">NM_178451.2</a> | FLJ39565              |             |                       |
| GI_31341960-S | 221.4  | 272.2  | 234.8  | TIP39     | <a href="#">NM_178449.2</a> |                       |             |                       |
| GI_31341961-S | 205.4  | 399.3  | 528.8  | MGC48332  | <a href="#">NM_178450.2</a> |                       | electron    | electron              |
| GI_31341967-S | 330.4  | 327.7  | 406.2  | LOC89958  | <a href="#">NM_178448.2</a> |                       | DNA         | nucleus regulation    |
| GI_31341989-S | 440.2  | 522.3  | 541    | FLJ37818  | <a href="#">NM_175916.2</a> |                       |             |                       |
| GI_31341990-S | 114    | 116.7  | 123.6  | FLJ37228  | <a href="#">NM_175917.2</a> |                       |             |                       |
| GI_31342038-S | 107.5  | 104.7  | 112    | FLJ39654  | <a href="#">NM_175914.2</a> |                       |             |                       |
| GI_31342039-S | 225.7  | 249.5  | 229.5  | FLJ38343  | <a href="#">NM_175915.2</a> |                       | DNA         | nucleus regulation    |
| GI_31342074-S | 94.5   | 115.4  | 96.4   | FLJ39582  | <a href="#">NM_178315.2</a> |                       |             |                       |
| GI_31342079-S | 248.3  | 223.6  | 139.4  | FLJ39378  | <a href="#">NM_178314.2</a> |                       |             |                       |
| GI_31342170-S | 113.1  | 144.1  | 134.3  | C5orf12   | <a href="#">NM_178276.2</a> | TPO1                  | electron    | membran electron      |
| GI_31342210-S | 85.2   | 103.8  | 85.8   | MGC40047  | <a href="#">NM_175911.2</a> |                       | olfactory   | integral to G-protein |
| GI_31342211-S | 96.7   | 100.9  | 98.9   | FLJ39609  | <a href="#">NM_175912.2</a> |                       |             |                       |
| GI_31342225-S | 108.4  | 110.7  | 116.6  | MGC33608  | <a href="#">NM_175906.2</a> |                       |             |                       |
| GI_31342226-S | 487.4  | 507.7  | 513.7  | MGC45594  | <a href="#">NM_175907.2</a> |                       | alcohol     |                       |
| GI_31342232-S | 98.9   | 123.9  | 109.6  | FLJ40121  | <a href="#">NM_175904.2</a> |                       | transporte  | membran transport     |
| GI_31342241-S | 104    | 132.7  | 109.5  | LOC283932 | <a href="#">NM_175901.2</a> |                       |             |                       |
| GI_31342242-S | 191.6  | 230.2  | 184.4  | LOC284033 | <a href="#">NM_175903.2</a> |                       |             |                       |
| GI_31342253-S | 315.5  | 389.4  | 353    | FIS       | <a href="#">NM_175616.2</a> |                       |             |                       |
| GI_31342255-S | 889.2  | 647.2  | 1472.9 | MT1J      | <a href="#">NM_175622.2</a> | MT1;MTB               | metal ion   |                       |
| GI_31342257-S | 149.8  | 117.5  | 129.7  | LOC143425 | <a href="#">NM_175733.2</a> |                       |             |                       |
| GI_31342258-S | 95     | 95     | 90.6   | LOC201243 | <a href="#">NM_175734.2</a> |                       |             |                       |
| GI_31342260-S | 155.5  | 245.5  | 161.7  | FLJ35681  | <a href="#">NM_175900.2</a> |                       | DNA         | nucleus regulation    |
| GI_31342325-S | 108.8  | 104.6  | 106.3  | NMNAT3    | <a href="#">NM_178177.2</a> | PNAT3;PNAT-3          | nucleotidyl | biosynthes            |
| GI_31342330-S | 418    | 513.9  | 462.4  | TREML1    | <a href="#">NM_178174.2</a> | TLT1;TLT-1;dJ238O23.3 |             |                       |
| GI_31342331-S | 98     | 110.9  | 110.4  | LHFPL1    | <a href="#">NM_178175.2</a> |                       |             |                       |
| GI_31342336-S | 159.3  | 174.1  | 154.4  | LOC338328 | <a href="#">NM_178172.2</a> |                       | DNA         | nucleus regulation    |
| GI_31342337-S | 139.3  | 154    | 138.8  | LOC339834 | <a href="#">NM_178173.2</a> |                       |             |                       |
| GI_31342341-S | 139.5  | 162.4  | 162.5  | NEK8      | <a href="#">NM_178170.2</a> | NEK12A                | cAMP-       | protein               |
| GI_31342342-S | 321.2  | 374    | 345.5  | GSDM      | <a href="#">NM_178171.2</a> | FLJ39120              |             |                       |
| GI_31342347-S | 111.8  | 116.9  | 97.4   | RASSF3    | <a href="#">NM_178169.2</a> | RASSF5                |             |                       |
| GI_31342353-S | 116.1  | 123.7  | 116    | ZNF598    | <a href="#">NM_178167.2</a> |                       |             |                       |
| GI_31342377-S | 197.9  | 235.2  | 217.5  | SCDR9     | <a href="#">NM_178135.2</a> |                       |             |                       |
| GI_31342394-S | 330.6  | 404.3  | 363.5  | TXL-2     | <a href="#">NM_178130.2</a> | TXNDC6                | nucleoside  | electron              |
| GI_31342398-S | 101.2  | 93.5   | 94     | ANGPTL5   | <a href="#">NM_178127.2</a> |                       |             |                       |
| GI_31342399-S | 101.4  | 108.4  | 109    | LOC283985 | <a href="#">NM_178128.2</a> |                       | oxidoredu   |                       |
| GI_31342404-S | 405    | 506.2  | 442.6  | TRIM50A   | <a href="#">NM_178125.2</a> | TRIM50                | zinc ion    | intracellula          |
| GI_31342405-S | 2327.8 | 2666.7 | 2798.9 | LOC162427 | <a href="#">NM_178126.2</a> |                       |             |                       |

|               |        |        |        |            |                             |                     |             |             |            |
|---------------|--------|--------|--------|------------|-----------------------------|---------------------|-------------|-------------|------------|
| GI_31342410-S | 263.3  | 505.4  | 439.9  | SESTD1     | <a href="#">NM_178123.2</a> | SOLO;DKFZp434O0515  |             |             | protein    |
| GI_31342415-S | 281.1  | 209.9  | 177.1  | LOC90529   | <a href="#">NM_178122.2</a> |                     |             |             |            |
| GI_31342420-S | 571.9  | 445.7  | 408.7  | DLX1       | <a href="#">NM_178120.2</a> |                     | transcripti | nucleus     | regulation |
| GI_31342522-S | 100.8  | 99.1   | 89.3   | DSG4       | <a href="#">NM_177986.2</a> | LAH;CDGF13;CDHF13   | calcium     | membran     | homophili  |
| GI_31342615-S | 776.4  | 985.7  | 781.4  | PHGDHL1    | <a href="#">NM_177967.2</a> | FLJ30548            |             |             |            |
| GI_31342620-S | 121.4  | 129.6  | 122.6  | LOC157657  | <a href="#">NM_177965.2</a> |                     |             |             |            |
| GI_31342626-S | 107.4  | 120.7  | 107.7  | SYT12      | <a href="#">NM_177963.2</a> | SRG1;SYT11          | transporte  | membran     | transport  |
| GI_31342650-S | 115.5  | 123    | 117.3  | C21orf61   | <a href="#">NM_178817.2</a> | B27;FALP            |             | integral to |            |
| GI_31343322-S | 137.7  | 128.9  | 131.2  | LOC283588  | <a href="#">NM_175897.2</a> |                     |             |             |            |
| GI_31343323-S | 94.7   | 97.7   | 100.2  | LOC283687  | <a href="#">NM_175898.2</a> |                     |             |             |            |
| GI_31343329-S | 101.9  | 97.8   | 100.4  | LOC152831  | <a href="#">NM_175737.2</a> |                     | hydrolase   |             | carbohydr  |
| GI_31343330-S | 130.3  | 219    | 178.3  | RAB37      | <a href="#">NM_175738.2</a> |                     | RAS small   |             | small      |
| GI_31343331-S | 117.5  | 129.1  | 111    | FLJ25590   | <a href="#">NM_175895.2</a> |                     |             |             |            |
| GI_31343332-S | 106.9  | 98.5   | 162.3  | LOC283476  | <a href="#">NM_175896.2</a> |                     |             |             |            |
| GI_31343337-S | 97.5   | 103.8  | 105    | SERPINA11  | <a href="#">NM_175739.2</a> | GCET1               |             |             |            |
| GI_31343338-S | 487.2  | 488.9  | 351.5  | LOC283241  | <a href="#">NM_175893.2</a> |                     |             |             |            |
| GI_31343339-S | 186.9  | 163.2  | 144.3  | FLJ33996   | <a href="#">NM_175894.2</a> |                     |             |             |            |
| GI_31343340-S | 87.7   | 99.1   | 86.3   | FAM9A      | <a href="#">NM_174951.2</a> |                     |             | nucleus     |            |
| GI_31343344-S | 481.4  | 466.1  | 400.2  | TRAPPC6B   | <a href="#">NM_177452.2</a> |                     |             |             |            |
| GI_31343345-S | 83.9   | 91.5   | 85.8   | ANKRD21    | <a href="#">NM_174981.2</a> | POTE                |             |             |            |
| GI_31343346-S | 234.8  | 199.3  | 180.4  | C14orf65   | <a href="#">NM_174979.2</a> |                     |             |             |            |
| GI_31343353-S | 130.8  | 160    | 140.5  | KRT6E      | <a href="#">NM_173086.2</a> |                     | structural  | kinesin     | cytoskelet |
| GI_31343354-S | 538.4  | 450.3  | 529.9  | PAQR3      | <a href="#">NM_177453.2</a> |                     |             |             |            |
| GI_31343355-S | 117.1  | 115.5  | 114.9  | MIST1      | <a href="#">NM_177455.2</a> |                     |             |             |            |
| GI_31343375-S | 323.9  | 332.5  | 387.9  | DKFZp586M1 | <a href="#">NM_178819.2</a> | LPAATZ              | acyltransf  |             | metabolis  |
| GI_31343395-S | 111.7  | 117.1  | 119.3  | LOC201164  | <a href="#">NM_178836.2</a> |                     |             |             |            |
| GI_31343439-S | 2882.4 | 3127.4 | 2565.1 | OLIG3      | <a href="#">NM_175747.2</a> | Bhlhb7              |             |             |            |
| GI_31343457-S | 134.2  | 186    | 153.1  | FBXO36     | <a href="#">NM_174899.3</a> |                     |             |             |            |
| GI_31343459-S | 101.5  | 108.1  | 89.1   | C6orf165   | <a href="#">NM_178823.2</a> | FLJ25974;dJ382110.1 |             |             |            |
| GI_31343475-S | 1356.8 | 1242.6 | 1037.5 | GNA13      | <a href="#">NM_006572.3</a> | G13;MGC46138        | heterotrim  | peripheral  | cell       |
| GI_31343480-S | 153.9  | 173.5  | 166.7  | LOC222171  | <a href="#">NM_175887.2</a> |                     |             |             |            |
| GI_31343481-S | 113.6  | 110.9  | 107.3  | FLJ37045   | <a href="#">NM_175889.2</a> |                     |             |             |            |
| GI_31343485-S | 460.4  | 396.1  | 393.4  | MGC2647    | <a href="#">NM_178841.2</a> | MGC14381            |             |             |            |
| GI_31343491-S | 1108.5 | 1016.1 | 818.8  | LOC152485  | <a href="#">NM_178835.2</a> |                     | electron    |             | electron   |
| GI_31343495-S | 422    | 399    | 396.5  | LOC129285  | <a href="#">NM_152994.2</a> |                     |             |             |            |
| GI_31343498-A | 186.2  | 191.1  | 179.5  | MGC33846   | <a href="#">NM_175885.2</a> | FLJ37735            | DNA         | nucleus     | regulation |
| GI_31343498-I | 103.5  | 110.4  | 99.4   | MGC33846   | <a href="#">NM_175885.2</a> | FLJ37735            | DNA         | nucleus     | regulation |
| GI_31343499-S | 103    | 125.2  | 124.3  | PRPS1L1    | <a href="#">NM_175886.2</a> | PRPS3;PRPSL;PRS-III | ribose-     | cellular_co | ribonucleo |
| GI_31343502-S | 95.5   | 104.5  | 95.9   | FLJ14503   | <a href="#">NM_152780.2</a> |                     |             |             |            |
| GI_31343527-S | 111.8  | 124.3  | 121.9  | MGC48986   | <a href="#">NM_175881.2</a> |                     |             |             |            |
| GI_31343528-S | 360.9  | 387.9  | 512.8  | FLJ36031   | <a href="#">NM_175884.2</a> |                     | DNA         | nucleus     | regulation |
| GI_31343531-S | 137.5  | 165.3  | 149.4  | LOC149830  | <a href="#">NM_177549.2</a> |                     |             |             |            |
| GI_31343532-S | 98     | 113.9  | 108.6  | SLC13A5    | <a href="#">NM_177550.2</a> | NACT                | transporte  | membran     | sodium     |
| GI_31343533-S | 1860.1 | 1319   | 1018.5 | LOC143903  | <a href="#">NM_178834.2</a> |                     | sugar       |             |            |

|               |        |        |        |           |                             |                                   |            |                        |
|---------------|--------|--------|--------|-----------|-----------------------------|-----------------------------------|------------|------------------------|
| GI_31343534-I | 1112.1 | 1074.8 | 1078.2 | CKLFSF4   | <a href="#">NM_178818.2</a> | cytokine                          | membran    | chemotaxi              |
| GI_31343572-S | 200.4  | 201.2  | 198.2  | MGC27345  | <a href="#">NM_175880.2</a> |                                   |            |                        |
| GI_31343579-S | 131.1  | 118.1  | 103    | MGC57211  | <a href="#">NM_175878.2</a> |                                   |            |                        |
| GI_31343584-S | 114.8  | 123.6  | 100.5  | C20orf65  | <a href="#">NM_176791.2</a> | MGC50820;dJ1028D15.4              |            |                        |
| GI_31343587-S | 168.9  | 212.8  | 172    | DEFT1     | <a href="#">NM_139127.2</a> |                                   |            |                        |
| GI_31343594-S | 147.7  | 175.2  | 135.6  | MGC47869  | <a href="#">NM_175874.2</a> |                                   |            |                        |
| GI_31343603-S | 147.1  | 185.8  | 162.3  | LOC90768  | <a href="#">NM_178838.2</a> |                                   |            |                        |
| GI_31343604-S | 1134.2 | 1300   | 1228.7 | LYRIC     | <a href="#">NM_178812.2</a> | 3D3;AEG1                          |            |                        |
| GI_31343610-S | 280.4  | 336    | 302.1  | FLJ35119  | <a href="#">NM_175871.2</a> |                                   |            |                        |
| GI_31343621-S | 109.3  | 109.1  | 109.3  | LOC150759 | <a href="#">NM_175853.2</a> |                                   |            |                        |
| GI_31343635-S | 476.1  | 388.7  | 277.9  | CHSY2     | <a href="#">NM_175856.2</a> |                                   |            |                        |
| GI_31343636-S | 299    | 365    | 346.9  | KRTAP8-1  | <a href="#">NM_175857.2</a> | KAP8.1                            |            | intermedia             |
| GI_31343637-S | 390.9  | 380.3  | 364.2  | KRTAP11-1 | <a href="#">NM_175858.2</a> | KAP11.1                           |            | intermedia             |
| GI_31377467-S | 338.3  | 456.9  | 391.9  | DOCK2     | <a href="#">NM_004946.1</a> | KIAA0209                          | GTPase     | cytoplasm small        |
| GI_31377534-S | 842    | 980.8  | 923.4  | LOC91966  | <a href="#">NM_178124.3</a> |                                   |            |                        |
| GI_31377537-S | 609.1  | 790.9  | 722.9  | LOC151194 | <a href="#">NM_145280.3</a> |                                   |            |                        |
| GI_31377542-S | 443.9  | 457.8  | 456.8  | C14orf24  | <a href="#">NM_173607.2</a> | FLJ38854                          | acylphosp  |                        |
| GI_31377545-S | 88.9   | 97.5   | 87.4   | FLJ40160  | <a href="#">NM_173484.2</a> |                                   |            |                        |
| GI_31377547-S | 180.3  | 160.3  | 321.8  | PGM2L1    | <a href="#">NM_173582.2</a> | BM32A;FLJ32029                    | intramolec | carbohydr              |
| GI_31377551-S | 739.6  | 907.2  | 853.5  | RAP2A     | <a href="#">NM_021033.3</a> | KREV;RAP2;RbBP-30                 | GTPase     | membran signal         |
| GI_31377552-S | 1122.9 | 1263   | 1199.7 | SFRS3     | <a href="#">NM_003017.3</a> | SRP20                             | RNA        | nucleus mRNA           |
| GI_31377553-S | 204    | 209.6  | 168.1  | EVER2     | <a href="#">NM_152468.3</a> | EV2;TMC8;EVIN2;MGC40121           |            |                        |
| GI_31377554-S | 271    | 249.7  | 211.2  | MGC46534  | <a href="#">NM_153340.2</a> |                                   |            |                        |
| GI_31377558-S | 149.9  | 172.1  | 162.2  | MGC14276  | <a href="#">NM_153248.2</a> |                                   |            |                        |
| GI_31377559-S | 168.5  | 144.1  | 194.4  | C10orf47  | <a href="#">NM_153256.2</a> | MGC35403                          |            |                        |
| GI_31377561-S | 136.9  | 132.1  | 135.9  | FAM29A    | <a href="#">NM_017645.3</a> | FLJ20060;KIAA1574                 |            |                        |
| GI_31377565-S | 136.4  | 161    | 144.3  | FLJ35794  | <a href="#">NM_152617.2</a> |                                   |            |                        |
| GI_31377567-S | 105    | 112.4  | 96.9   | CEGF3     | <a href="#">NM_152753.2</a> | FLJ34743                          | calcium    | membran blood          |
| GI_31377569-S | 178.2  | 203.1  | 172.9  | C9orf98   | <a href="#">NM_152572.2</a> | FLJ32704                          | ATP        |                        |
| GI_31377572-S | 244.7  | 216    | 253    | DUSP18    | <a href="#">NM_152511.2</a> | DUSP20;LMWDSP20;MGC32658          | protein    | protein                |
| GI_31377576-S | 656.3  | 822.2  | 684.8  | C10orf13  | <a href="#">NM_152429.2</a> | MGC39320                          | DNA        | nucleus regulation     |
| GI_31377582-S | 221.7  | 211.9  | 203.4  | UBXD3     | <a href="#">NM_152376.2</a> | FLJ25429                          |            |                        |
| GI_31377583-S | 84.8   | 87.7   | 98.9   | MTAC2D1   | <a href="#">NM_152332.2</a> | Tac2-N;C14orf47;FLJ36557;c14_5695 | transporte | membran transport      |
| GI_31377584-S | 732.9  | 807.8  | 920.4  | MGC26885  | <a href="#">NM_152339.2</a> |                                   |            |                        |
| GI_31377586-S | 227.7  | 267.8  | 234.2  | EVC2      | <a href="#">NM_147127.2</a> | LBN;LIMBIN                        | DNA        | integral to regulation |
| GI_31377588-S | 360.7  | 764    | 1121.6 | SYT11     | <a href="#">NM_152280.2</a> | SYT12;KIAA0080;MGC10881;MGC17226  | transporte | synaptic transport     |
| GI_31377590-S | 109.5  | 125.2  | 106.9  | SESN3     | <a href="#">NM_144665.2</a> | SEST3;MGC29667                    |            | nucleus cell cycle     |
| GI_31377592-S | 93.3   | 93.8   | 94.1   | FLJ25422  | <a href="#">NM_145000.2</a> |                                   |            |                        |
| GI_31377594-S | 383.3  | 446.9  | 464.6  | LOC124245 | <a href="#">NM_144604.2</a> |                                   |            |                        |
| GI_31377596-S | 104.8  | 118.7  | 115.4  | ZBTB8     | <a href="#">NM_144621.2</a> | BOZF1;MGC17919                    |            |                        |
| GI_31377600-S | 160.3  | 170    | 155.9  | C9orf97   | <a href="#">NM_139246.3</a> |                                   |            |                        |
| GI_31377606-S | 1398.8 | 1217.1 | 1299   | GL004     | <a href="#">NM_020194.4</a> |                                   |            |                        |
| GI_31377610-S | 98.5   | 100.2  | 92.8   | LOC130940 | <a href="#">NM_138803.2</a> |                                   |            |                        |
| GI_31377612-S | 635.4  | 718.9  | 697.4  | MYADM     | <a href="#">NM_138373.2</a> |                                   | transporte | synaptic transport     |

|               |        |        |        |           |                             |                      |                          |                        |
|---------------|--------|--------|--------|-----------|-----------------------------|----------------------|--------------------------|------------------------|
| GI_31377613-S | 136.5  | 138    | 113.7  | LOC113444 | <a href="#">NM_138428.2</a> |                      |                          |                        |
| GI_31377615-S | 288.5  | 360.4  | 291.3  | BBAP      | <a href="#">NM_138287.2</a> |                      |                          |                        |
| GI_31377616-S | 129.5  | 121.9  | 104.9  | FLJ22313  | <a href="#">NM_022373.3</a> |                      |                          |                        |
| GI_31377617-S | 203.9  | 250.2  | 217.4  | UGT1A8    | <a href="#">NM_019076.3</a> | UGT1H                | UDP-                     | metabolis              |
| GI_31377621-S | 452.9  | 511.8  | 484.9  | DEDD2     | <a href="#">NM_133328.2</a> | FLAME-3              |                          |                        |
| GI_31377622-S | 123.9  | 137.4  | 121.8  | MYOZ3     | <a href="#">NM_133371.2</a> | CS3;CS-3;FRP3        |                          |                        |
| GI_31377624-S | 760.2  | 978    | 890.5  | LOC133619 | <a href="#">NM_130809.2</a> |                      |                          |                        |
| GI_31377625-S | 549.8  | 652    | 582    | DUSP19    | <a href="#">NM_080876.2</a> | SKRP1;DUSP17;TS-DSP1 | protein                  | protein                |
| GI_31377626-S | 1412.3 | 1284.9 | 1064.3 | AD24      | <a href="#">NM_022451.9</a> | FLJ12820             |                          |                        |
| GI_31377627-S | 147.9  | 166    | 155    | LOH12CR1  | <a href="#">NM_058169.2</a> | LOH1CR12             |                          |                        |
| GI_31377628-S | 261.8  | 363.2  | 285.3  | CPA5      | <a href="#">NM_080385.2</a> |                      | carboxype                | proteolysis            |
| GI_31377630-S | 107.7  | 102.9  | 103.7  | GBP5      | <a href="#">NM_052942.2</a> |                      | GTPase                   | immune                 |
| GI_31377631-S | 328.2  | 409.8  | 367.4  | LOC117584 | <a href="#">NM_057178.2</a> |                      |                          |                        |
| GI_31377632-S | 90.3   | 91.2   | 93.2   | TSGA13    | <a href="#">NM_052933.2</a> |                      |                          |                        |
| GI_31377633-S | 197.6  | 240.3  | 199.9  | GBP4      | <a href="#">NM_052941.2</a> | Mpa2                 | GTPase                   | immune                 |
| GI_31377635-S | 139.7  | 164.2  | 155.5  | RFT1      | <a href="#">NM_052859.2</a> |                      | integral to              |                        |
| GI_31377636-S | 257.1  | 298.6  | 270.9  | MGC21854  | <a href="#">NM_052862.2</a> |                      |                          |                        |
| GI_31377638-S | 97.4   | 103.2  | 96.3   | SIGLEC10  | <a href="#">NM_033130.2</a> | SLG2;SIGLEC-10       | lectin [goid integral to | cell                   |
| GI_31377640-S | 160    | 174.5  | 177.2  | SRP       | <a href="#">NM_033199.2</a> | URP                  | adrenocor                | extracellul response   |
| GI_31377641-S | 215.7  | 192.6  | 169.7  | CML66     | <a href="#">NM_032869.2</a> | FLJ14991             |                          |                        |
| GI_31377643-S | 528.3  | 567.5  | 454.1  | FLJ14600  | <a href="#">NM_032810.2</a> |                      | nucleotide               |                        |
| GI_31377647-S | 102.3  | 109.3  | 107.5  | FLJ14397  | <a href="#">NM_032779.2</a> |                      |                          |                        |
| GI_31377649-S | 225.9  | 328    | 334.9  | FLJ14399  | <a href="#">NM_032780.2</a> |                      |                          |                        |
| GI_31377651-S | 323.7  | 381    | 327.9  | MGC11332  | <a href="#">NM_032718.2</a> |                      | transporte               | integral to transport  |
| GI_31377653-S | 147.1  | 142.1  | 116.4  | MGC16291  | <a href="#">NM_032770.2</a> |                      |                          |                        |
| GI_31377655-S | 1392.5 | 1345.1 | 1431.4 | MGC11102  | <a href="#">NM_032325.2</a> |                      | translation              | translation            |
| GI_31377657-S | 136.7  | 155.8  | 155.1  | RNASE7    | <a href="#">NM_032572.2</a> |                      | pancreatic               | extracellul xenobiotic |
| GI_31377662-S | 959    | 906.5  | 1019.5 | SVH       | <a href="#">NM_031905.2</a> | MGC3195              |                          |                        |
| GI_31377664-S | 719.7  | 842.9  | 780.5  | KCTD10    | <a href="#">NM_031954.2</a> | MSTP028              | voltage-                 | membran potassium      |
| GI_31377665-S | 578.3  | 709.8  | 676.8  | MGC12904  | <a href="#">NM_031219.2</a> |                      | hydrolase                | metabolis              |
| GI_31377666-S | 450.8  | 563.1  | 567    | LONP      | <a href="#">NM_031490.2</a> | MGC4840              | nucleotide               | mitochond ATP-         |
| GI_31377669-S | 96.6   | 101.3  | 118    | OR12D3    | <a href="#">NM_030959.2</a> | hs6M1-27             | olfactory                | integral to olfaction  |
| GI_31377680-S | 282.5  | 362.2  | 340.1  | FLJ12975  | <a href="#">NM_024809.2</a> |                      |                          |                        |
| GI_31377684-S | 608.5  | 551.7  | 470.8  | FLJ23151  | <a href="#">NM_024772.2</a> |                      |                          |                        |
| GI_31377692-S | 369.9  | 450.7  | 427.4  | FLJ23560  | <a href="#">NM_024685.2</a> |                      | ATP                      | protein                |
| GI_31377694-S | 182.3  | 172    | 167    | FLJ12586  | <a href="#">NM_024620.2</a> |                      | nucleus                  |                        |
| GI_31377696-S | 1717.2 | 1744.2 | 1783.2 | FLJ22329  | <a href="#">NM_024656.2</a> |                      |                          | lipopolysa             |
| GI_31377698-S | 218.8  | 157.8  | 154    | OGFRL1    | <a href="#">NM_024576.2</a> | FLJ21079;dJ331H24.1  | receptor                 | membran cell growth    |
| GI_31377700-S | 415.1  | 307.3  | 337.3  | FLJ20896  | <a href="#">NM_024605.2</a> |                      |                          |                        |
| GI_31377702-S | 448.5  | 495.9  | 462.3  | TTC13     | <a href="#">NM_024525.2</a> | FLJ22584             |                          |                        |
| GI_31377704-S | 158.4  | 184.3  | 149.2  | FLJ23047  | <a href="#">NM_024548.2</a> |                      |                          |                        |
| GI_31377708-S | 212.4  | 264.8  | 238.8  | USP46     | <a href="#">NM_022832.2</a> | FLJ12552             | cysteine-                | ubiquitin-             |
| GI_31377710-S | 442.2  | 385.8  | 373.4  | FLJ22104  | <a href="#">NM_022918.2</a> |                      |                          |                        |
| GI_31377716-S | 143.8  | 150.7  | 142.5  | EFCBP1    | <a href="#">NM_022351.2</a> | NECAB1;STIP-1        | calcium                  |                        |



|               |        |        |        |             |                             |                                    |              |              |            |
|---------------|--------|--------|--------|-------------|-----------------------------|------------------------------------|--------------|--------------|------------|
| GI_31377717-S | 88.1   | 101.5  | 95.7   | FLJ21195    | <a href="#">NM_022469.2</a> |                                    |              |              |            |
| GI_31377719-S | 306.4  | 361.6  | 345.1  | PLEKHA1     | <a href="#">NM_021622.2</a> | TAPP1                              |              |              |            |
| GI_31377721-S | 2646   | 3003.2 | 3790.3 | PERP        | <a href="#">NM_022121.2</a> | THW;KCP1;PIGPC1;KRTCAP1;dJ496H19.1 |              |              |            |
| GI_31377723-S | 1111   | 1331.5 | 972    | NR2F2       | <a href="#">NM_021005.2</a> | ARP1;SVP40;COUPTFB;TFCOUP2;COUP-   | ligand-      | nucleus      | lipid      |
| GI_31377724-S | 341.6  | 252.4  | 321.1  | ZNF462      | <a href="#">NM_021224.2</a> | Zfp462;KIAA1803;DKFZP762N2316      |              |              |            |
| GI_31377726-S | 290.6  | 411    | 301.3  | CTL2        | <a href="#">NM_020428.2</a> |                                    | choline      | integral to  | choline    |
| GI_31377729-S | 464.5  | 367.2  | 341.4  | LOC56902    | <a href="#">NM_020143.2</a> |                                    | nucleic      |              |            |
| GI_31377732-S | 422.1  | 433.3  | 377.1  | RIF1        | <a href="#">NM_018372.2</a> | FLJ11269                           |              |              |            |
| GI_31377734-S | 267    | 331    | 296.2  | ERO1LB      | <a href="#">NM_019891.2</a> | ERO1-L(BETA)                       | chaperone    | endoplas     | protein    |
| GI_31377736-S | 130.8  | 131.2  | 127    | FLJ20716    | <a href="#">NM_017938.2</a> |                                    |              |              |            |
| GI_31377738-S | 448.2  | 537.4  | 478.7  | FLJ11336    | <a href="#">NM_018393.2</a> |                                    |              |              |            |
| GI_31377740-S | 1487.4 | 1484.8 | 1411.1 | SLC41A3     | <a href="#">NM_017836.2</a> | FLJ20473;SLC41A1-L2                |              |              |            |
| GI_31377743-S | 3957.3 | 3670.5 | 3363   | FLJ20397    | <a href="#">NM_017802.2</a> |                                    |              |              |            |
| GI_31377745-S | 115.6  | 107    | 102.5  | FLJ20433    | <a href="#">NM_017820.2</a> | FLJ30442                           |              |              |            |
| GI_31377747-S | 277.3  | 262.2  | 301.4  | FLJ20296    | <a href="#">NM_017750.2</a> |                                    |              |              |            |
| GI_31377749-S | 1307.9 | 1363.3 | 1818.4 | C2orf21     | <a href="#">NM_017798.2</a> | FLJ20391                           |              |              |            |
| GI_31377751-S | 272    | 379.4  | 377.4  | MPRG        | <a href="#">NM_017705.2</a> | PAQR5;FLJ20190                     |              | integral to  |            |
| GI_31377755-S | 173.3  | 203    | 190.5  | C10orf92    | <a href="#">NM_017609.2</a> | ba288G11.4;DKFZp434A1721           |              |              |            |
| GI_31377757-S | 379.3  | 361.4  | 339.4  | AFTIPHILIN  | <a href="#">NM_017657.2</a> | FLJ20080;FLJ23793                  | calcium      |              |            |
| GI_31377759-S | 519    | 547.5  | 459.9  | LOC51240    | <a href="#">NM_016467.3</a> |                                    |              |              |            |
| GI_31377760-S | 102    | 101.2  | 106.5  | GPR85       | <a href="#">NM_018970.3</a> | SREB;SREB2                         | G-protein    | integral to  | signal     |
| GI_31377762-S | 125.5  | 140.2  | 131.1  | KLF15       | <a href="#">NM_014079.2</a> | KKLF                               | DNA          | nucleus      | regulation |
| GI_31377763-S | 204.9  | 186.5  | 255.7  | ZDHHC2      | <a href="#">NM_016353.2</a> | ZNF372                             | zinc ion     | integral to  | regulation |
| GI_31377764-S | 281    | 293.3  | 299.6  | DKFZP564G2  | <a href="#">NM_015497.2</a> |                                    |              |              |            |
| GI_31377766-S | 2189.1 | 2230.6 | 1035.2 | GRINL1A     | <a href="#">NM_015532.2</a> | DKFZp586F1918                      | receptor     |              |            |
| GI_31377769-S | 736.6  | 460.8  | 709.6  | DKFZP434C2  | <a href="#">NM_015426.2</a> |                                    |              |              |            |
| GI_31377771-S | 116.4  | 119.8  | 114.1  | H963        | <a href="#">NM_013308.2</a> |                                    | rhodopsin-   | integral to  | G-protein  |
| GI_31377776-S | 95.6   | 113    | 98.7   | NKX2-8      | <a href="#">NM_014360.2</a> | NKX2H;NKX2.8;Nkx2-9                | RNA          | nucleus      | oncogene   |
| GI_31377778-S | 1604.6 | 1997.8 | 1006.5 | STK38       | <a href="#">NM_007271.2</a> | NDR                                | protein      | nucleus      | protein    |
| GI_31377779-S | 820.5  | 747.4  | 646.5  | ZHX1        | <a href="#">NM_007222.2</a> |                                    | transcripti  | nucleus      | regulation |
| GI_31377781-S | 863.4  | 651.6  | 929.3  | PRKCD       | <a href="#">NM_006254.2</a> |                                    | diacylglyc   | membran      | protein    |
| GI_31377784-S | 155.1  | 166.3  | 161.7  | NPY5R       | <a href="#">NM_006174.2</a> | NPYR5                              | neuropepti   | integral to  | G-protein  |
| GI_31377785-S | 417.7  | 498.6  | 375.4  | PITPN       | <a href="#">NM_006224.2</a> | VIB1A;PITPNA                       | phosphati    | intracellula | vision     |
| GI_31377786-S | 108.7  | 112.3  | 112.4  | GPR6        | <a href="#">NM_005284.2</a> |                                    | G-protein    | integral to  | G-protein  |
| GI_31377787-S | 267    | 235.8  | 313.2  | SIAT10      | <a href="#">NM_006100.2</a> | ST3GALVI                           | sialyltransf | Golgi        | amino      |
| GI_31377788-S | 164.7  | 180.3  | 325.1  | GPR37       | <a href="#">NM_005302.2</a> | PAELR;EDNRBL                       | G-protein    | integral to  | G-protein  |
| GI_31377789-S | 104.7  | 115.5  | 119.2  | GPR41       | <a href="#">NM_005304.2</a> |                                    | G-protein    | integral to  | G-protein  |
| GI_31377790-S | 130.9  | 152.2  | 133.8  | CD80        | <a href="#">NM_005191.2</a> | LAB7;CD28LG;CD28LG1                | receptor     | integral to  | signal     |
| GI_31377791-S | 230.9  | 252.3  | 369.9  | GPR3        | <a href="#">NM_005281.2</a> | ACCA                               | G-protein    | integral to  | G-protein  |
| GI_31377792-S | 235.7  | 290    | 281.2  | ET(B)R-LP-2 | <a href="#">NM_004767.2</a> |                                    | G-protein    | integral to  | G-protein  |
| GI_31377794-S | 924.1  | 1133   | 1714.8 | CALM1       | <a href="#">NM_006888.2</a> | CAMI;PHKD;DD132;CALML2             | protein      | cytoplasm    | G-protein  |
| GI_31377795-S | 1509.4 | 1596   | 1004   | MTMR4       | <a href="#">NM_004687.3</a> | ZFYVE11;KIAA0647;FYVE-DSP2         | protein      |              | protein    |
| GI_31377797-S | 845    | 899.3  | 742.8  | RABEP1      | <a href="#">NM_004703.2</a> | RAB5EP;RABPT5                      | vesicle      | early        | endocytosi |
| GI_31377801-S | 1649.3 | 2022.1 | 515.9  | SEMA3F      | <a href="#">NM_004186.2</a> | SEMA4;SEMAK;SEMA-IV;sema IV        |              | extracellul  | developm   |

|               |        |        |        |           |                             |                                   |             |              |             |
|---------------|--------|--------|--------|-----------|-----------------------------|-----------------------------------|-------------|--------------|-------------|
| GI_31377803-S | 191.5  | 195.8  | 192.7  | ZNF345    | <a href="#">NM_003419.2</a> | HZF10                             | transcripti | nucleus      | regulation  |
| GI_31377804-S | 388.3  | 431.9  | 413.3  | ZNF45     | <a href="#">NM_003425.2</a> |                                   | transcripti | nucleus      | regulation  |
| GI_31377805-S | 121.9  | 146.5  | 123.6  | PIGR      | <a href="#">NM_002644.2</a> |                                   | protein     | integral to  | protein     |
| GI_31377807-S | 99     | 111.1  | 96.5   | TFAP2B    | <a href="#">NM_003221.2</a> | CHAR;AP-2B;AP2-B                  | transcripti | nucleus      | regulation  |
| GI_31377808-S | 250.9  | 298.5  | 276.4  | PRKCG     | <a href="#">NM_002739.2</a> | PKCC;PKCG;SCA14                   | protein     |              | protein     |
| GI_31377809-S | 523.2  | 583.5  | 592.3  | NDST2     | <a href="#">NM_003635.2</a> | NST2;HSST2;NCST2                  | heparin N-  | Golgi        |             |
| GI_31377810-S | 451.6  | 475.9  | 494.9  | LSS       | <a href="#">NM_002340.2</a> | OSC                               | lanosterol  |              | steroid     |
| GI_31377824-S | 1198.2 | 1316.7 | 1288.9 | CL640     | <a href="#">NM_015697.3</a> |                                   |             |              |             |
| GI_31377831-S | 102.2  | 120.2  | 93.7   | PKHD1L1   | <a href="#">NM_177531.2</a> | PKHDL1;DKFZp586C1021              |             |              |             |
| GI_31377836-S | 350.4  | 327.2  | 247.6  | FLJ21901  | <a href="#">NM_024622.2</a> | KIAA1800                          |             |              |             |
| GI_31377838-S | 151.3  | 189.1  | 165.6  | ZNF606    | <a href="#">NM_025027.2</a> | FLJ14260;KIAA1852                 | nucleic     | intracellula | regulation  |
| GI_31377840-S | 546.2  | 780.9  | 672.4  | FLJ11280  | <a href="#">NM_018379.2</a> |                                   | DNA         | nucleus      | regulation  |
| GI_31377842-S | 115.4  | 134.2  | 116.4  | SCN3B     | <a href="#">NM_018400.2</a> | SCNB3;HSA243396                   | voltage-    | integral to  | sodium      |
| GI_31377845-S | 90.9   | 93.2   | 88.3   | FLJ11142  | <a href="#">NM_018338.2</a> |                                   |             |              |             |
| GI_31377847-S | 317.7  | 400.7  | 360.7  | FLJ10074  | <a href="#">NM_017988.2</a> |                                   |             |              |             |
| GI_31415879-A | 153.8  | 170.2  | 152.6  | PPP1R1B   | <a href="#">NM_181505.1</a> | DARPP32;DARPP-32;FLJ20940         | protein     | cytoplasm    | signal      |
| GI_31415879-I | 146.3  | 156.5  | 163.1  | PPP1R1B   | <a href="#">NM_181505.1</a> | DARPP32;DARPP-32;FLJ20940         | protein     | cytoplasm    | signal      |
| GI_31415881-S | 2333.1 | 1624.9 | 1525.1 | OIP2      | <a href="#">NM_181503.1</a> | RRP43                             | exonuclea   | nucleus      | rRNA        |
| GI_31442407-S | 328.1  | 303.9  | 211.8  | SNRK      | <a href="#">NM_017719.3</a> | HSNFRK;FLJ20224;KIAA0096          | protein-    |              | protein     |
| GI_31442413-S | 78.4   | 88.8   | 86.2   | C7orf9    | <a href="#">NM_022150.2</a> | RFRP                              | G-protein   | membran      | neuropepti  |
| GI_31442419-S | 137.6  | 169.6  | 149.8  | APXL2     | <a href="#">NM_133456.1</a> | KIAA1960                          |             |              |             |
| GI_31442760-S | 108.8  | 105.2  | 108.9  | ACCN5     | <a href="#">NM_017419.1</a> | INAC;HINAC                        | sodium      | membran      | sodium      |
| GI_31455610-S | 128.2  | 138.4  | 118.1  | ZAP70     | <a href="#">NM_001079.2</a> | SRK;STD;ZAP-70                    | protein-    |              | protein     |
| GI_31455613-S | 679.3  | 833.1  | 747.5  | F-LANa    | <a href="#">NM_016041.2</a> | CGI-101;F-LAN-1                   |             | integral to  |             |
| GI_31541779-S | 572.9  | 748.2  | 803.8  | 101F6     | <a href="#">NM_007022.3</a> | TSP10                             | ubiquitin   | integral to  | cyclin      |
| GI_31541784-S | 615.6  | 655.5  | 581.7  | ABI2      | <a href="#">NM_005759.3</a> | ABI-2;ABI2B;AIP-1;AbiBP3;argBPIA  | SH3/SH2     | cytoplasm    | biological_ |
| GI_31541843-S | 103.3  | 97.3   | 79.5   | ACRC      | <a href="#">NM_052957.2</a> | NAAR1                             |             | nucleus      |             |
| GI_31541858-S | 1064.1 | 1110.7 | 1050.8 | ACTR6     | <a href="#">NM_022496.2</a> | CDA12;hARP6;hARPX;FLJ13433        | structural  | actin        |             |
| GI_31541901-S | 154.9  | 168.4  | 149    | AMBP      | <a href="#">NM_001633.2</a> | HCP;ITI;UTI;ITIL                  | endopepti   |              | transport   |
| GI_31541940-S | 191.5  | 162.2  | 171.5  | APG-1     | <a href="#">NM_014278.2</a> |                                   | heat        | cytoplasm    | heat        |
| GI_31541963-S | 801.7  | 706.8  | 919    | ASL       | <a href="#">NM_000048.2</a> |                                   | argininosu  | cytoplasm    | urea cycle  |
| GI_31542090-S | 758.2  | 763.4  | 679.4  | CREB3L4   | <a href="#">NM_130898.2</a> | JAL;hJAL;ATCE1;CREB3;CREB4;AIBZIP | DNA         | nucleus      | regulation  |
| GI_31542152-S | 154    | 156.2  | 169.5  | NPY       | <a href="#">NM_000905.2</a> |                                   | calcium     | cell [goid   | regulation  |
| GI_31542183-S | 139.2  | 151.3  | 132    | BARHL1    | <a href="#">NM_020064.2</a> |                                   | transcripti | nucleus      | regulation  |
| GI_31542206-S | 128.3  | 125.5  | 115    | BCNP1     | <a href="#">NM_173544.2</a> |                                   |             |              |             |
| GI_31542212-S | 131.2  | 143    | 134.4  | BXMAS2-10 | <a href="#">NM_145016.2</a> | MGC24009                          |             |              |             |
| GI_31542241-S | 1066.8 | 895.5  | 717.8  | C14orf10  | <a href="#">NM_017917.2</a> | G4-1;G5pr;FLJ20644                | calcium     |              |             |
| GI_31542243-S | 172.4  | 188.3  | 179.8  | LRFN5     | <a href="#">NM_152447.2</a> | FLJ30803;C14orf146                | DNA         | nucleus      |             |
| GI_31542245-S | 781    | 673.5  | 787    | C16orf44  | <a href="#">NM_024731.2</a> | FLJ12543                          |             |              |             |
| GI_31542247-S | 549.8  | 494.3  | 398.1  | SLC39A11  | <a href="#">NM_139177.2</a> | C17orf26                          | heavy       | membran      | heavy       |
| GI_31542248-S | 641.9  | 967    | 971.8  | C1GALT2   | <a href="#">NM_152692.2</a> | COSMC;HSPC067;C1Gal-              | transferas  |              |             |
| GI_31542249-S | 104.1  | 199.8  | 140.7  | C1R       | <a href="#">NM_001733.2</a> |                                   | compleme    |              | immune      |
| GI_31542254-S | 140.7  | 142.1  | 133.7  | C20orf160 | <a href="#">NM_080625.2</a> | dJ310O13.5                        |             |              |             |
| GI_31542256-S | 254.6  | 269    | 420.2  | C20orf172 | <a href="#">NM_024918.2</a> | FLJ13346;dJ469A13.2               |             |              |             |

|               |        |        |        |             |                             |                                |             |             |             |
|---------------|--------|--------|--------|-------------|-----------------------------|--------------------------------|-------------|-------------|-------------|
| GI_31542262-S | 174.2  | 209.7  | 173.3  | C20orf59    | <a href="#">NM_022082.2</a> | FLJ23412                       |             |             |             |
| GI_31542267-S | 749.1  | 936.1  | 581.1  | C21orf7     | <a href="#">NM_020152.2</a> | TAK1L                          | transcripti | regulation  |             |
| GI_31542268-S | 113.9  | 95.7   | 100.9  | C22orf1     | <a href="#">NM_001585.2</a> | 239AB;FAM1A                    | molecular   | cellular_co | biological_ |
| GI_31542288-S | 126.1  | 133.1  | 130.7  | C7orf16     | <a href="#">NM_006658.2</a> | GSBS                           | protein     | soluble     | protein     |
| GI_31542289-S | 150.1  | 202.7  | 173.2  | C9          | <a href="#">NM_001737.2</a> |                                | hemolysin   | membran     | compleme    |
| GI_31542290-S | 9694.3 | 11808  | 10071  | CANX        | <a href="#">NM_001746.2</a> | CNX                            | chaperone   | endoplas    | protein     |
| GI_31542291-S | 2668.7 | 3263.1 | 3436.8 | CCT3        | <a href="#">NM_005998.2</a> | Cctg;TRIC5                     | chaperone   | cytosol     | protein     |
| GI_31542293-S | 81.3   | 84.8   | 63     | CD2         | <a href="#">NM_001767.2</a> | T11;SRBC                       | receptor    | soluble     | cell        |
| GI_31542299-S | 712    | 612    | 533.8  | CGI-115     | <a href="#">NM_016052.2</a> |                                |             |             |             |
| GI_31542304-S | 86.1   | 110.2  | 104.6  | CH25H       | <a href="#">NM_003956.2</a> | C25H                           | steroid     | membran     | lipid       |
| GI_31542307-S | 265.1  | 378.7  | 287.7  | CHST1       | <a href="#">NM_003654.2</a> | C6ST;KS6ST;KSGAL6ST            | sulfotransf | integral to | polysacch   |
| GI_31542310-S | 116.1  | 120.7  | 109.5  | CLCNKA      | <a href="#">NM_004070.2</a> |                                | voltage-    | membran     | small       |
| GI_31542314-S | 650.7  | 834.2  | 795.7  | CNOT8       | <a href="#">NM_004779.4</a> | CAF1;POP2;CALIF;hCAF1          | transcripti | nucleus     | negative    |
| GI_31542322-S | 1922   | 2277.8 | 2234.3 | CRIP2       | <a href="#">NM_001312.2</a> | CRIP;CRP2;ESP1                 | zinc ion    |             |             |
| GI_31542324-S | 180.4  | 200.3  | 199.7  | CROT        | <a href="#">NM_021151.2</a> | COT                            | carnitine   | peroxisom   | fatty acid  |
| GI_31542326-S | 91.4   | 97     | 104    | SLC22A16    | <a href="#">NM_033125.2</a> | CT2;OCT6;OKB1;FLIPT2;dJ261K5.1 | transporte  | integral to | transport   |
| GI_31542479-S | 465.8  | 610.8  | 598.8  | D4ST1       | <a href="#">NM_130468.2</a> | HD4ST;D4ST-1;HNK1ST            | transferas  | integral to | dermatan    |
| GI_31542491-S | 811.4  | 767.9  | 833.3  | DAXX        | <a href="#">NM_001350.2</a> | DAP6;BING2                     | receptor    | kinesin     | activation  |
| GI_31542492-S | 313.8  | 373.5  | 361.7  | DBP         | <a href="#">NM_001352.2</a> | DABP                           | RNA         | nucleus     | regulation  |
| GI_31542500-S | 285.7  | 277.3  | 203.4  | DEF6        | <a href="#">NM_022047.2</a> | IBP                            |             |             |             |
| GI_31542502-S | 4144.7 | 2906.2 | 3308.4 | DEK         | <a href="#">NM_003472.2</a> | D6S231E                        | specific    | nucleus     | viral       |
| GI_31542505-S | 189.4  | 225.6  | 191.5  | DHDH        | <a href="#">NM_014475.2</a> | HUM2DD                         | NAD(P)      |             | carbohydr   |
| GI_31542506-S | 92.2   | 94.6   | 95     | DKFZP434A1  | <a href="#">NM_032132.2</a> |                                |             |             |             |
| GI_31542508-S | 526.3  | 749.3  | 665.7  | ADP-GK      | <a href="#">NM_031284.3</a> | DKFZP434B195                   |             |             |             |
| GI_31542510-S | 91.1   | 103.4  | 96.9   | DKFZP434F1  | <a href="#">NM_032135.2</a> |                                |             |             |             |
| GI_31542512-S | 100.5  | 138.9  | 117.8  | SLC41A2     | <a href="#">NM_032148.2</a> | SLC41A1-L1;DKFZP434K0427       | cation      |             | cation      |
| GI_31542516-S | 171.4  | 184.4  | 149.7  | DKFZP434N1  | <a href="#">NM_032137.2</a> |                                |             |             |             |
| GI_31542518-S | 728.1  | 743.7  | 661.7  | DKFZP434N1  | <a href="#">NM_030974.2</a> |                                |             |             |             |
| GI_31542523-S | 2536.6 | 2819.6 | 2872.3 | DKFZP564K0  | <a href="#">NM_030796.2</a> | FLJ20532                       |             |             |             |
| GI_31542525-S | 2339.4 | 2580.9 | 1670.4 | DKFZP564O0  | <a href="#">NM_015420.4</a> | HSPC064                        |             |             |             |
| GI_31542527-S | 913.5  | 892    | 625.6  | DKFZP566B1  | <a href="#">NM_015509.2</a> |                                |             |             |             |
| GI_31542529-S | 201.3  | 209.7  | 192.8  | DKFZp434I09 | <a href="#">NM_032269.3</a> |                                |             |             |             |
| GI_31542532-S | 139.3  | 163.6  | 180.2  | DKFZp761G0  | <a href="#">NM_152542.2</a> |                                | protein     | protein     | protein     |
| GI_31542536-S | 2057.6 | 1223.8 | 1306.2 | RAM2        | <a href="#">NM_018719.2</a> | DKFZp762L0311                  |             |             |             |
| GI_31542542-S | 1815.5 | 2268   | 2696.1 | DNER        | <a href="#">NM_139072.2</a> |                                | structural  | integral to |             |
| GI_31542584-S | 376.8  | 383.2  | 351    | EDN2        | <a href="#">NM_001956.2</a> | ET2                            | growth      | soluble     | transmem    |
| GI_31542585-S | 431.3  | 516.1  | 738    | EIF4EBP2    | <a href="#">NM_004096.3</a> | 4EBP2                          | translation |             | regulation  |
| GI_31542586-S | 84.1   | 88.4   | 87.8   | EMX2        | <a href="#">NM_004098.2</a> |                                | transcripti | nucleus     | regulation  |
| GI_31542589-S | 194.8  | 225.8  | 204.4  | ETV7        | <a href="#">NM_016135.2</a> | TEL2;TELB;TEL-2                | specific    | nucleus     | histogene   |
| GI_31542627-S | 191.6  | 242.7  | 223.8  | FBN3        | <a href="#">NM_032447.2</a> | KIAA1776                       | calcium     |             |             |
| GI_31542630-S | 120.4  | 130.7  | 114.5  | FCRH1       | <a href="#">NM_052938.3</a> |                                |             |             |             |
| GI_31542631-S | 2997.9 | 3779   | 2792.5 | FDFT1       | <a href="#">NM_004462.2</a> | DGPT                           | magnesi     | endoplas    | steroid     |
| GI_31542633-S | 122.9  | 160.3  | 123.3  | FILIP1      | <a href="#">NM_015687.1</a> | FILIP;KIAA1275                 |             |             |             |
| GI_31542635-S | 714.6  | 822.7  | 552.9  | FKSG32      | <a href="#">NM_031307.2</a> |                                | pseudouri   |             | tRNA        |

|               |        |        |        |          |                             |                           |  |  |  |                           |
|---------------|--------|--------|--------|----------|-----------------------------|---------------------------|--|--|--|---------------------------|
| GI_31542640-S | 300.5  | 302.2  | 296.6  | TRMT1    | <a href="#">NM_018006.2</a> | TRMU;FLJ10140             |  |  |  | methyltran cytoplasm tRNA |
| GI_31542644-S | 225.8  | 290    | 268.8  | FLJ10260 | <a href="#">NM_018042.2</a> |                           |  |  |  |                           |
| GI_31542649-S | 220.1  | 308.7  | 305.9  | FLJ10298 | <a href="#">NM_018050.2</a> |                           |  |  |  |                           |
| GI_31542657-S | 353.8  | 661.8  | 412.2  | MLSTD1   | <a href="#">NM_018099.3</a> | FLJ10462                  |  |  |  |                           |
| GI_31542660-S | 295.2  | 353.5  | 310.4  | FLJ10747 | <a href="#">NM_018202.2</a> |                           |  |  |  |                           |
| GI_31542662-S | 101.3  | 103.2  | 95.2   | FLJ10884 | <a href="#">NM_019079.2</a> |                           |  |  |  |                           |
| GI_31542664-S | 124.7  | 144.6  | 130.6  | FLJ11004 | <a href="#">NM_018296.2</a> |                           |  |  |  |                           |
| GI_31542666-S | 134.6  | 152.4  | 136.7  | FLJ11036 | <a href="#">NM_018306.2</a> |                           |  |  |  |                           |
| GI_31542670-S | 1121.9 | 1345.6 | 1270.1 | C6orf209 | <a href="#">NM_018368.2</a> | FLJ11240;bA810I22.1       |  |  |  |                           |
| GI_31542672-S | 104.2  | 136.6  | 126.7  | FLJ11749 | <a href="#">NM_024591.2</a> |                           |  |  |  | molecular                 |
| GI_31542677-S | 683.5  | 788.9  | 698.2  | FLJ12525 | <a href="#">NM_031206.2</a> | dJ475B7.2                 |  |  |  |                           |
| GI_31542679-S | 290.6  | 279.4  | 374.3  | FLJ12785 | <a href="#">NM_024855.2</a> |                           |  |  |  | motor actin               |
| GI_31542681-S | 524.3  | 505.6  | 469    | QTRTD1   | <a href="#">NM_024638.2</a> | FLJ12960                  |  |  |  | queuine queuosine         |
| GI_31542685-S | 342.1  | 325.6  | 328.7  | FLJ13263 | <a href="#">NM_025125.2</a> |                           |  |  |  |                           |
| GI_31542687-S | 1166.2 | 1326.3 | 1706.7 | FLJ13448 | <a href="#">NM_025147.2</a> |                           |  |  |  | molecular                 |
| GI_31542688-S | 134.2  | 216.7  | 236.4  | FLJ14054 | <a href="#">NM_024563.2</a> |                           |  |  |  |                           |
| GI_31542689-S | 114.7  | 134.2  | 105.2  | FLJ14146 | <a href="#">NM_024709.2</a> |                           |  |  |  | DNA nucleus regulation    |
| GI_31542690-S | 119    | 118.2  | 108.8  | FLJ14281 | <a href="#">NM_024920.3</a> |                           |  |  |  | N- DNA                    |
| GI_31542694-S | 244.4  | 179.9  | 145.8  | FLJ14594 | <a href="#">NM_032808.2</a> |                           |  |  |  |                           |
| GI_31542696-S | 309.2  | 330.9  | 348.4  | FLJ14639 | <a href="#">NM_032815.2</a> |                           |  |  |  | DNA nucleus regulation    |
| GI_31542698-S | 242.7  | 218.8  | 221.5  | FLJ14981 | <a href="#">NM_032868.2</a> |                           |  |  |  |                           |
| GI_31542700-S | 263.9  | 319.4  | 281    | AHI1     | <a href="#">NM_017651.3</a> | ORF1;FLJ20069             |  |  |  |                           |
| GI_31542702-S | 1307.3 | 954.8  | 953.2  | FLJ20244 | <a href="#">NM_017722.2</a> |                           |  |  |  | S- tRNA                   |
| GI_31542705-S | 288    | 223.4  | 242.1  | FLJ20485 | <a href="#">NM_019042.2</a> | KIAA1897                  |  |  |  | molecular tRNA            |
| GI_31542706-S | 1184.2 | 1325   | 629.7  | COMMD8   | <a href="#">NM_017845.2</a> | FLJ20502                  |  |  |  |                           |
| GI_31542708-S | 196    | 238.5  | 224.1  | TTC12    | <a href="#">NM_017868.2</a> | TPARM;FLJ13859;FLJ20535   |  |  |  |                           |
| GI_31542710-S | 142.5  | 158.3  | 163.5  | C2orf18  | <a href="#">NM_017877.2</a> | FLJ20555                  |  |  |  |                           |
| GI_31542712-S | 133.8  | 194    | 139.1  | FLJ20605 | <a href="#">NM_017898.3</a> |                           |  |  |  |                           |
| GI_31542714-S | 1376.4 | 1596.7 | 1328.3 | FLJ20618 | <a href="#">NM_017903.2</a> |                           |  |  |  |                           |
| GI_31542717-S | 192.5  | 222.6  | 151.6  | ECHDC3   | <a href="#">NM_024693.2</a> | FLJ20909                  |  |  |  | catalytic metabolis       |
| GI_31542719-S | 777.3  | 909.1  | 591.3  | FLJ20920 | <a href="#">NM_025149.2</a> |                           |  |  |  | catalytic metabolis       |
| GI_31542721-S | 535.7  | 771.3  | 574.7  | FLJ21127 | <a href="#">NM_024549.3</a> |                           |  |  |  |                           |
| GI_31542722-S | 2143.6 | 1891.1 | 1847   | FLJ21347 | <a href="#">NM_022827.2</a> | FLJ21969                  |  |  |  |                           |
| GI_31542726-S | 583.5  | 168    | 142.1  | FLJ21986 | <a href="#">NM_024913.3</a> |                           |  |  |  |                           |
| GI_31542728-S | 1125   | 1518.1 | 769.7  | DHX40    | <a href="#">NM_024612.3</a> | PAD;DDX40;ARG147;FLJ22060 |  |  |  | nucleic                   |
| GI_31542730-S | 117.3  | 122.5  | 144.4  | FLJ22269 | <a href="#">NM_032219.2</a> |                           |  |  |  |                           |
| GI_31542734-S | 419.4  | 236.1  | 233.6  | FLJ22531 | <a href="#">NM_024650.2</a> |                           |  |  |  |                           |
| GI_31542737-S | 117.4  | 107.4  | 101.3  | FLJ22593 | <a href="#">NM_024703.2</a> |                           |  |  |  |                           |
| GI_31542738-S | 180.3  | 228.5  | 214.4  | FLJ22609 | <a href="#">NM_022072.2</a> |                           |  |  |  |                           |
| GI_31542739-S | 106.6  | 96     | 95.3   | FLJ22655 | <a href="#">NM_024730.2</a> |                           |  |  |  | small small               |
| GI_31542740-S | 87.5   | 103.7  | 104.2  | FLJ22746 | <a href="#">NM_024785.2</a> |                           |  |  |  |                           |
| GI_31542742-S | 118.6  | 111.7  | 110.3  | FLJ22843 | <a href="#">NM_025184.2</a> | FLJ22601;dJ1158H2.1       |  |  |  |                           |
| GI_31542744-S | 2238.5 | 2293.2 | 1625.1 | FLJ23091 | <a href="#">NM_024911.3</a> |                           |  |  |  |                           |
| GI_31542746-S | 401.9  | 324.9  | 354.4  | FLJ23841 | <a href="#">NM_144589.2</a> |                           |  |  |  | S-                        |

|               |        |        |        |          |                             |                                      |             |                         |
|---------------|--------|--------|--------|----------|-----------------------------|--------------------------------------|-------------|-------------------------|
| GI_31542748-S | 279.3  | 336.7  | 166.2  | FLJ25067 | <a href="#">NM_152504.2</a> |                                      |             |                         |
| GI_31542750-S | 477.1  | 414.8  | 325.8  | FLJ25078 | <a href="#">NM_152485.2</a> | nucleic                              | membran     | transport               |
| GI_31542751-S | 406.4  | 285.5  | 277.9  | ZNF533   | <a href="#">NM_152520.2</a> | FLJ25270                             | RNA         | nucleus                 |
| GI_31542755-S | 955.8  | 797.8  | 1042   | FLJ30002 | <a href="#">NM_152341.2</a> |                                      |             |                         |
| GI_31542757-S | 125.7  | 113    | 122.5  | FLJ30046 | <a href="#">NM_144595.2</a> |                                      |             |                         |
| GI_31542758-S | 88     | 88.6   | 98.5   | FLJ30672 | <a href="#">NM_153016.2</a> |                                      |             |                         |
| GI_31542759-S | 230.3  | 264.8  | 229.8  | FLJ30707 | <a href="#">NM_145019.2</a> |                                      |             |                         |
| GI_31542761-S | 254.5  | 218.7  | 213    | FLJ32452 | <a href="#">NM_144576.2</a> |                                      |             |                         |
| GI_31542769-S | 109.1  | 96.4   | 99.8   | FLJ33718 | <a href="#">NM_173660.2</a> |                                      |             |                         |
| GI_31542771-S | 130.5  | 142.3  | 130    | ZNF491   | <a href="#">NM_152356.2</a> | FLJ34791                             |             | nucleus                 |
| GI_31542773-S | 554.1  | 1217   | 914.3  | FLJ35155 | <a href="#">NM_152531.3</a> |                                      |             |                         |
| GI_31542774-S | 347.7  | 274.9  | 212.5  | FLJ35220 | <a href="#">NM_173627.2</a> |                                      |             |                         |
| GI_31542776-S | 137.5  | 148.2  | 122.5  | FLJ35867 | <a href="#">NM_152455.2</a> |                                      | transcripti | nucleus regulation      |
| GI_31542782-S | 190.5  | 184.4  | 148.2  | FLJ38628 | <a href="#">NM_152267.2</a> |                                      |             |                         |
| GI_31542788-S | 623.1  | 590.9  | 693.3  | ABHD7    | <a href="#">NM_173567.2</a> | EPHXRP;FLJ90341                      | epoxide     | response                |
| GI_31542790-S | 88.8   | 84     | 83.6   | FMO3     | <a href="#">NM_006894.3</a> | FMOII;dJ127D3.1                      | dimethyla   | microsom electron       |
| GI_31542792-S | 113.3  | 121    | 103.8  | FN3K     | <a href="#">NM_022158.2</a> |                                      | transferas  | cellular_co fructoselys |
| GI_31542834-S | 129.5  | 209.1  | 118.9  | GAL3ST-4 | <a href="#">NM_024637.3</a> | FLJ12116                             |             |                         |
| GI_31542839-S | 561.8  | 582.3  | 514.2  | GCSH     | <a href="#">NM_004483.2</a> | GCE;NKH                              | aminomet    | glycine glycine         |
| GI_31542844-S | 101.4  | 89.1   | 91.5   | GJA10    | <a href="#">NM_030772.2</a> | CX58;CX59                            | connexon    | connexon cell           |
| GI_31542846-S | 109.3  | 122.4  | 109.8  | GJB1     | <a href="#">NM_000166.2</a> | CMTX;CX32;CMTX1                      | connexon    | connexon small          |
| GI_31542847-S | 137.7  | 160.1  | 141.1  | GJB5     | <a href="#">NM_005268.2</a> | CX31.1                               | connexon    | connexon epidermal      |
| GI_31542848-S | 294.6  | 430.2  | 374.7  | GMPR     | <a href="#">NM_006877.2</a> |                                      | GMP         | response                |
| GI_31542850-S | 141.7  | 154    | 135.8  | GNA14    | <a href="#">NM_004297.2</a> |                                      | heterotrim  | peripheral signal       |
| GI_31542852-S | 148.7  | 148    | 150.2  | GPR18    | <a href="#">NM_005292.2</a> |                                      | G-protein   | integral to G-protein   |
| GI_31542855-S | 100.6  | 89.6   | 97.9   | GPR80    | <a href="#">NM_080818.2</a> | GPR99                                | receptor    | integral to G-protein   |
| GI_31542857-S | 197.7  | 128.5  | 117.3  | GPR87    | <a href="#">NM_023915.2</a> | GPR95                                | receptor    | integral to G-protein   |
| GI_31542861-S | 765.5  | 855.9  | 695    | GRWD1    | <a href="#">NM_031485.2</a> | GRWD;WDR28                           |             |                         |
| GI_31542866-S | 2185.4 | 1628.7 | 2048.3 | RRAGC    | <a href="#">NM_022157.2</a> | GTR2;RAGC;FLJ13311                   | small       | cytoplasm transport     |
| GI_31542869-S | 102.8  | 122.5  | 102.5  | GZMH     | <a href="#">NM_033423.2</a> | CCP-X;CGL-2;CSP-C;CTLA1;CTSG2        | trypsin     | cytoplasm proteolysis   |
| GI_31542933-S | 87.8   | 73.7   | 81     | HHLA2    | <a href="#">NM_007072.2</a> |                                      | molecular   | cellular_co biological_ |
| GI_31542934-S | 95.7   | 94.8   | 96.6   | HLF      | <a href="#">NM_002126.3</a> |                                      | double-     | nucleus transcripti     |
| GI_31542938-S | 87.4   | 76     | 78.5   | HPGD     | <a href="#">NM_000860.2</a> | PGDH1;15-PGDH                        | catalytic   | prostaglan              |
| GI_31542940-S | 121.9  | 133.5  | 120.6  | HSD11B2  | <a href="#">NM_000196.2</a> | AME;AME1;HSD11K                      | 11-beta-    | microsom glucocorti     |
| GI_31542944-S | 1741.6 | 1906.2 | 1860.3 | HSPC117  | <a href="#">NM_014306.2</a> | DJ149A16.6                           | molecular   |                         |
| GI_31542945-S | 1524.6 | 2390.3 | 1116.8 | CXXC5    | <a href="#">NM_016463.5</a> | HSPC195                              |             |                         |
| GI_31542979-S | 235.8  | 249.5  | 171    | IFIT4    | <a href="#">NM_001549.2</a> | IFI60;ISG60;RIG-G;CIG-49             | molecular   | cellular_co immune      |
| GI_31542985-S | 88.2   | 103.4  | 89.4   | ITLN1    | <a href="#">NM_017625.2</a> | LFR;HL-1;ITLN;hintL;FLJ20022         |             |                         |
| GI_31542987-S | 3555.1 | 5746.8 | 4223.1 | ITM2B    | <a href="#">NM_021999.2</a> | BRI;FBD;ABRI;BRI2;E25B;E3-16;BRICD2B | structural  | membran neurogene       |
| GI_31543016-S | 313.6  | 404    | 333.7  | KIAA0103 | <a href="#">NM_014673.2</a> |                                      |             | nucleus                 |
| GI_31543022-S | 111    | 165.3  | 102.9  | KSP37    | <a href="#">NM_031950.2</a> |                                      |             |                         |
| GI_31543054-S | 346.2  | 409.5  | 422.8  | LGP1     | <a href="#">NM_032484.3</a> |                                      | molecular   | cellular_co biological_ |
| GI_31543055-S | 134.2  | 129.8  | 131.9  | LILRA3   | <a href="#">NM_006865.2</a> | HM31;HM43;ILT6;LIR4;CD85E;LIR-4      | antigen     | plasma defense          |
| GI_31543057-S | 131.3  | 144.1  | 120.7  | LILRB5   | <a href="#">NM_006840.2</a> | LIR8;CD85C;LIR-8                     | defense/i   | defense                 |

|               |        |        |        |           |                             |                        |            |                    |
|---------------|--------|--------|--------|-----------|-----------------------------|------------------------|------------|--------------------|
| GI_31543059-S | 119.6  | 175.4  | 135.4  | LOC112817 | <a href="#">NM_138413.2</a> |                        |            |                    |
| GI_31543061-S | 105.1  | 115.4  | 89     | LOC120224 | <a href="#">NM_138788.2</a> |                        |            |                    |
| GI_31543062-S | 179.9  | 155.9  | 201.9  | GLYCTK    | <a href="#">NM_145262.2</a> |                        |            |                    |
| GI_31543066-S | 108.4  | 171.3  | 176.4  | LOC146845 | <a href="#">NM_145054.2</a> |                        |            |                    |
| GI_31543068-S | 289.5  | 325.7  | 279.9  | LOC148523 | <a href="#">NM_144697.2</a> |                        |            |                    |
| GI_31543071-S | 127    | 136    | 138    | LOC161931 | <a href="#">NM_139174.2</a> |                        |            |                    |
| GI_31543075-S | 304.8  | 380.8  | 342.5  | C6orf128  | <a href="#">NM_145316.2</a> | dJ355M6.2              |            |                    |
| GI_31543079-S | 3850.2 | 1403.8 | 1772.8 | RNF149    | <a href="#">NM_173647.2</a> | DNAPTP2                | peptidase  | proteolysis        |
| GI_31543080-S | 95.1   | 143.2  | 115.5  | LOC51161  | <a href="#">NM_016210.2</a> |                        |            |                    |
| GI_31543081-S | 517.9  | 708.7  | 1304.3 | LOC51257  | <a href="#">NM_016496.3</a> |                        | electron   | electron           |
| GI_31543084-S | 555.8  | 837.7  | 799.3  | DHRS6     | <a href="#">NM_020139.2</a> | UCPA-OR                |            |                    |
| GI_31543086-S | 451.7  | 349    | 422.6  | THAP10    | <a href="#">NM_020147.2</a> |                        |            |                    |
| GI_31543087-S | 520.6  | 430.6  | 366.1  | LOC57146  | <a href="#">NM_020422.3</a> |                        |            |                    |
| GI_31543088-S | 141.7  | 216.2  | 153.8  | LOC81558  | <a href="#">NM_030802.2</a> |                        |            |                    |
| GI_31543090-S | 2294.3 | 1857.9 | 1655   | LOC84549  | <a href="#">NM_032509.2</a> |                        | nucleic    |                    |
| GI_31543092-S | 135.7  | 167.9  | 132.1  | LOC89944  | <a href="#">NM_138342.2</a> |                        | beta-      | beta-<br>carbohydr |
| GI_31543094-S | 126.9  | 143.1  | 121.8  | LOC90050  | <a href="#">NM_138344.2</a> |                        |            |                    |
| GI_31543096-S | 1574.7 | 1989.7 | 1771.6 | LRSAM1    | <a href="#">NM_138361.2</a> |                        |            |                    |
| GI_31543098-S | 142.2  | 153.5  | 135.3  | LOC92346  | <a href="#">NM_139240.2</a> |                        |            |                    |
| GI_31543105-S | 292.2  | 376.4  | 336.4  | LU        | <a href="#">NM_005581.2</a> | AU;BCAM;MSK19          | blood      | integral to cell   |
| GI_31543135-S | 401.1  | 381    | 465.1  | MAF1      | <a href="#">NM_032272.2</a> | DKFZp586G1123          |            |                    |
| GI_31543139-S | 132.1  | 118.5  | 110.4  | USHBP1    | <a href="#">NM_031941.2</a> | MCC2;AIEBP             |            |                    |
| GI_31543141-S | 210.2  | 187.4  | 169.8  | ZNF34     | <a href="#">NM_030580.2</a> | KOX32;MGC10520         | nucleic    | nucleus regulation |
| GI_31543143-S | 98.3   | 112.2  | 97.7   | C9orf64   | <a href="#">NM_032307.2</a> | MGC10999               |            |                    |
| GI_31543145-S | 481.2  | 1055.5 | 1015.9 | MGC11256  | <a href="#">NM_024324.2</a> | CRELD2                 | structural |                    |
| GI_31543147-S | 131.4  | 141.2  | 137.5  | MGC11271  | <a href="#">NM_024323.3</a> |                        |            |                    |
| GI_31543149-S | 686.6  | 725.1  | 958.3  | MGC11308  | <a href="#">NM_032889.2</a> |                        |            |                    |
| GI_31543151-S | 2971.2 | 2679.2 | 2633   | MGC14817  | <a href="#">NM_032338.2</a> |                        |            |                    |
| GI_31543152-S | 97.4   | 96.4   | 99.6   | MGC15730  | <a href="#">NM_032880.2</a> |                        |            |                    |
| GI_31543154-S | 949.7  | 1116.5 | 1034.3 | MGC15737  | <a href="#">NM_032926.2</a> |                        | DNA        | nucleus regulation |
| GI_31543155-S | 108.8  | 121.5  | 112.4  | MGC15827  | <a href="#">NM_032882.2</a> |                        |            |                    |
| GI_31543156-S | 114.1  | 124.2  | 111.6  | MGC15937  | <a href="#">NM_080661.2</a> |                        |            |                    |
| GI_31543158-S | 233.9  | 260.6  | 337.6  | MGC16824  | <a href="#">NM_020314.3</a> | FLJ21040;DKFZp434B0212 |            |                    |
| GI_31543160-S | 89.9   | 98.9   | 94.2   | MGC21621  | <a href="#">NM_145015.2</a> |                        |            |                    |
| GI_31543163-S | 878.4  | 560.2  | 691.8  | MGC2655   | <a href="#">NM_024339.2</a> |                        |            |                    |
| GI_31543168-S | 353.6  | 425.7  | 475    | MGC2705   | <a href="#">NM_032701.2</a> |                        | DNA        | nucleus regulation |
| GI_31543175-S | 542.6  | 550.3  | 718.6  | C2orf17   | <a href="#">NM_024293.2</a> | MGC3035                |            |                    |
| GI_31543177-S | 348.3  | 357.6  | 421    | MGC3121   | <a href="#">NM_024031.2</a> |                        |            |                    |
| GI_31543178-S | 481.6  | 424.8  | 593.9  | MGC3130   | <a href="#">NM_024032.2</a> | FLJ11594               |            |                    |
| GI_31543180-S | 283.9  | 612.4  | 317.9  | MGC3265   | <a href="#">NM_024028.2</a> |                        |            |                    |
| GI_31543182-S | 106.8  | 121    | 114.1  | MGC34827  | <a href="#">NM_152693.2</a> |                        |            |                    |
| GI_31543183-S | 114    | 112.2  | 100.5  | 3'HEXO    | <a href="#">NM_153332.2</a> | MGC35395               | exonuclea  | intracellula       |
| GI_31543187-S | 104.1  | 107.4  | 105.6  | MGC39662  | <a href="#">NM_152394.2</a> |                        |            |                    |
| GI_31543190-S | 89.9   | 104.4  | 100    | MGC4248   | <a href="#">NM_032333.2</a> |                        |            |                    |

|               |         |        |        |           |                             |                                   |             |                         |
|---------------|---------|--------|--------|-----------|-----------------------------|-----------------------------------|-------------|-------------------------|
| GI_31543192-S | 136.5   | 140.1  | 120.9  | MGC45438  | <a href="#">NM_152459.2</a> |                                   |             |                         |
| GI_31543194-S | 203.1   | 220.2  | 234.4  | MGC45866  | <a href="#">NM_152259.2</a> |                                   |             |                         |
| GI_31543197-S | 633.7   | 521.2  | 299.2  | MGC4796   | <a href="#">NM_032017.1</a> | SHIK                              |             |                         |
| GI_31543199-S | 962.1   | 948.5  | 1169.3 | C7orf21   | <a href="#">NM_031434.2</a> | SB144;MGC5442                     | integral to |                         |
| GI_31543200-S | 176.6   | 192.9  | 180.7  | MGC5601   | <a href="#">NM_025247.2</a> |                                   | acyl-CoA    | electron                |
| GI_31543202-S | 2249.6  | 2017.2 | 2180   | MGC8974   | <a href="#">NM_052940.3</a> | dJ167A19.4                        |             |                         |
| GI_31543203-S | 112.2   | 117.6  | 108.5  | MGC9564   | <a href="#">NM_080669.2</a> |                                   |             |                         |
| GI_31543206-S | 2972.8  | 2376.8 | 2095.9 | MMS19L    | <a href="#">NM_022362.2</a> | MET18;MMS19;hMMS19                |             |                         |
| GI_31543208-S | 162.5   | 160.6  | 146.1  | MPN       | <a href="#">NM_031948.2</a> | CAPH2                             | trypsin     | proteolysis             |
| GI_31543210-S | 16969.9 | 17867  | 13006  | MRCL3     | <a href="#">NM_006471.2</a> | MLCB;MRLC3                        | calcium     | muscle regulation       |
| GI_31543211-S | 368.9   | 542.8  | 366.2  | MST1      | <a href="#">NM_020998.2</a> | MSP;HGFL;NF15S2;D3F15S2;DNF15S2   | thrombin    | cellular_co proteolysis |
| GI_31543213-S | 1585.6  | 1004.9 | 1842.3 | MT1X      | <a href="#">NM_005952.2</a> | MT1;MT-1I                         | heavy       | heavy                   |
| GI_31543214-S | 17689.7 | 13743  | 27249  | MT2A      | <a href="#">NM_005953.2</a> | MT2                               | heavy       | copper ion              |
| GI_31543215-S | 3060    | 1210.1 | 808.4  | MYC       | <a href="#">NM_002467.2</a> | c-Myc                             | transcripti | nucleus iron ion        |
| GI_31543267-S | 296     | 365.4  | 282.7  | MtFMT     | <a href="#">NM_139242.2</a> |                                   | methyltran  | mitochond protein       |
| GI_31543282-S | 102.3   | 103.7  | 92.6   | NALP14    | <a href="#">NM_176822.2</a> | NOD5                              | binding     | membran transport       |
| GI_31543284-S | 1853.3  | 1503.1 | 1557.4 | NDEL1     | <a href="#">NM_030808.2</a> | NUDEL;MITAP1                      |             |                         |
| GI_31543285-S | 150.5   | 146.6  | 134.3  | NEK9      | <a href="#">NM_033116.3</a> | Nek8;NERCC;NERCC1;MGC16714;DKFZp4 | protein-    | protein                 |
| GI_31543287-S | 105.4   | 128.1  | 109.3  | NFAM1     | <a href="#">NM_145912.3</a> | CNAIP;FLJ00165                    |             | integral to             |
| GI_31543288-S | 108.5   | 103.9  | 102.6  | NICN1     | <a href="#">NM_032316.2</a> | MGC12936                          |             |                         |
| GI_31543289-S | 2621    | 2661.9 | 3310.3 | NINJ1     | <a href="#">NM_004148.2</a> | NIN1;NINJURIN                     | cell        | integral to cell        |
| GI_31543290-S | 916.2   | 1035.7 | 773    | NIT2      | <a href="#">NM_020202.2</a> |                                   | hydrolase   | nitrogen                |
| GI_31543291-S | 147.6   | 265.5  | 108.9  | NKD2      | <a href="#">NM_033120.2</a> |                                   |             |                         |
| GI_31543295-S | 184.1   | 226.9  | 178.7  | NPY1R     | <a href="#">NM_000909.3</a> | NPYR                              | neuropepti  | integral to G-protein   |
| GI_31543296-S | 1434.5  | 1034.2 | 1147.4 | NSMAF     | <a href="#">NM_003580.2</a> | FAN                               | receptor    | soluble ceramide        |
| GI_31543298-S | 1833.9  | 1625.9 | 1912.2 | NTE       | <a href="#">NM_006702.2</a> | sws                               | serine      | pan-neural              |
| GI_31543300-S | 1844.3  | 1823.8 | 1736.4 | NUDC      | <a href="#">NM_006600.2</a> | HNUDC;MNUDC                       |             | regulation              |
| GI_31543301-S | 96.7    | 103.6  | 92.5   | NYD-SP17  | <a href="#">NM_032600.2</a> |                                   |             |                         |
| GI_31543302-S | 95.2    | 87.9   | 86.4   | NYD-SP26  | <a href="#">NM_033122.2</a> |                                   |             |                         |
| GI_31543304-S | 125.2   | 124.4  | 118.7  | TTLL2     | <a href="#">NM_031949.2</a> | C6orf104;NYD-TSPG;dJ366N23.3      | tubulin-    | protein                 |
| GI_31543356-S | 618.6   | 770.7  | 952.6  | OCSP      | <a href="#">NM_031945.2</a> |                                   |             | integral to             |
| GI_31543358-S | 451.1   | 529.8  | 319.2  | ODC-p     | <a href="#">NM_052998.2</a> |                                   | ornithine   | cellular_co polyamine   |
| GI_31543361-S | 1058.4  | 569.4  | 940.1  | ORF1-FL49 | <a href="#">NM_032412.2</a> |                                   | rhodopsin-  | integral to G-protein   |
| GI_31543362-S | 223.6   | 275.5  | 181.7  | OVGP1     | <a href="#">NM_002557.2</a> | MUC9                              | hydrolase   | extracellul pregnancy   |
| GI_31543378-S | 3150.7  | 3076.7 | 4132.4 | P5326     | <a href="#">NM_031450.2</a> |                                   |             |                         |
| GI_31543381-S | 167.6   | 268.1  | 191    | PARVG     | <a href="#">NM_022141.3</a> |                                   | actin       | cytoskelet cell-matrix  |
| GI_31543382-S | 199.9   | 184    | 180.9  | KCMF1     | <a href="#">NM_020122.2</a> | PCMF;ZZZ1;DEBT91;DKFZP434L1021    | zinc ion    |                         |
| GI_31543384-S | 188.8   | 283.6  | 268.3  | PCYT1A    | <a href="#">NM_005017.2</a> | CT;CTPCT;PCYT1                    | choline-    | soluble phospholi       |
| GI_31543388-S | 381.5   | 480.5  | 446    | PDK2      | <a href="#">NM_002611.3</a> |                                   | [pyruvate   | mitochond glucose       |
| GI_31543389-S | 196     | 204.5  | 174.3  | PDCD1LG2  | <a href="#">NM_025239.2</a> | B7DC;Btdc;PDL2;PD-L2;PDCD1L2      | molecular   | cellular_co immune      |
| GI_31543390-S | 493.4   | 580.7  | 460.1  | PEG10     | <a href="#">NM_015068.2</a> |                                   |             |                         |
| GI_31543391-S | 112.3   | 103.1  | 96.3   | PPARGC1B  | <a href="#">NM_133263.2</a> | PERC;PGC1B;PGC-1(beta)            |             |                         |
| GI_31543395-S | 2698.3  | 4915.4 | 3868.2 | PGAM1     | <a href="#">NM_002629.2</a> | PGAMA                             | bisphosph   | cytosol glycolysis      |
| GI_31543396-S | 95.7    | 95.9   | 91.5   | PGK2      | <a href="#">NM_138733.2</a> | PGKB;PGK-2;PGKPS;dJ417L20.2       | phosphogl   | cytosol glycolysis      |

|               |        |        |        |          |                             |                                  |             |             |              |
|---------------|--------|--------|--------|----------|-----------------------------|----------------------------------|-------------|-------------|--------------|
| GI_31543398-S | 320.8  | 255.6  | 335.2  | PHCA     | <a href="#">NM_018367.3</a> | APHC;FLJ11238                    | hydrolase   | integral to |              |
| GI_31543399-S | 910    | 972.6  | 883.9  | PIAS3    | <a href="#">NM_006099.2</a> |                                  | transcripti |             | oncogene     |
| GI_31543400-S | 477.3  | 432    | 317.5  | PIM1     | <a href="#">NM_002648.2</a> | PIM                              | protein     | cytoplasm   | protein      |
| GI_31543409-S | 150.2  | 173.9  | 155.3  | PLA2G7   | <a href="#">NM_005084.2</a> | PAFAH;LDL-PLA2                   | phospholi   | 2-acetyl-1- | lipid        |
| GI_31543411-S | 181    | 168.8  | 141.9  | PLEKHF1  | <a href="#">NM_024310.2</a> | APPD;MGC4090;PHAFIN1;ZFYVE15     | zinc ion    |             |              |
| GI_31543413-S | 207    | 258.3  | 228    | PLEKHF2  | <a href="#">NM_024613.2</a> | PHAFIN2;ZFYVE18;FLJ13187         | zinc ion    |             |              |
| GI_31543414-S | 133.9  | 124.6  | 119.4  | PLINP-1  | <a href="#">NM_052850.2</a> | PRG6;CKBBP2;MGC4667;MGC4758      |             |             |              |
| GI_31543416-S | 3287.7 | 4277.1 | 3898.2 | PLSCR3   | <a href="#">NM_020360.2</a> |                                  | calcium     | integral to | phospholi    |
| GI_31543418-S | 1025.9 | 839.6  | 839.5  | PNKP     | <a href="#">NM_007254.2</a> | PNK                              | DNA         | nucleus     | response     |
| GI_31543421-S | 143.5  | 157    | 130.8  | PNMT     | <a href="#">NM_002686.2</a> | PENT                             | phenyleth   |             | catechola    |
| GI_31543422-S | 2052.8 | 2003.2 | 2321.5 | POLE3    | <a href="#">NM_017443.3</a> | p17;YBL1;CHRAC17;CHARAC17        | epsilon     | kinesin     | DNA          |
| GI_31543430-S | 2083   | 2888.4 | 3167.9 | PPP1CA   | <a href="#">NM_002708.2</a> | PPP1A                            | protein     |             | protein      |
| GI_31543437-S | 116.1  | 137.3  | 131.9  | PRKACA   | <a href="#">NM_002730.2</a> |                                  | cAMP-       | cAMP-       | protein      |
| GI_31543440-S | 669.7  | 967.6  | 716.2  | PRO0659  | <a href="#">NM_014138.2</a> |                                  |             |             |              |
| GI_31543442-S | 1386.1 | 1373.5 | 752    | PRPS2    | <a href="#">NM_002765.2</a> | PRSII;PRS II                     | ribose-     |             | nucleobas    |
| GI_31543449-S | 1638.2 | 819.3  | 302.8  | PTX3     | <a href="#">NM_002852.2</a> | TSG-14                           |             | extracellul | inflammat    |
| GI_31543450-S | 1880.6 | 2033   | 1686.5 | PX19     | <a href="#">NM_013237.2</a> | PRELI;CGI-106                    |             |             | developm     |
| GI_31543451-S | 428.1  | 691    | 362.1  | PXK      | <a href="#">NM_017771.2</a> | FLJ20335                         | ATP         |             | protein      |
| GI_31543534-S | 505.8  | 589.7  | 582.7  | R3HDM    | <a href="#">NM_015361.2</a> | KIAA0029                         |             |             |              |
| GI_31543536-S | 2687.8 | 2789.6 | 2583.2 | RAB34    | <a href="#">NM_031934.3</a> | RAH;RAB39                        |             |             |              |
| GI_31543538-S | 1864.4 | 2466.5 | 2166.4 | RAB5A    | <a href="#">NM_004162.3</a> | RAB5                             | vesicle     | early       | endocytosi   |
| GI_31543539-S | 105.6  | 101.6  | 105.9  | RABIF    | <a href="#">NM_002871.3</a> | MSS4;RASGFR3;RASGRF3             | guanyl-     |             | membran      |
| GI_31543542-S | 3126.9 | 4971.6 | 5263.9 | RAI17    | <a href="#">NM_020338.1</a> | Zimp10;FLJ13541;KIAA1224         | zinc ion    |             |              |
| GI_31543547-S | 1023.9 | 1214.5 | 907.5  | RBM7     | <a href="#">NM_016090.2</a> |                                  | RNA         | nucleus     | meiosis      |
| GI_31543548-S | 3936.1 | 4101.1 | 3145   | REA      | <a href="#">NM_007273.3</a> | BAP                              | receptor    | cellular_co | negative     |
| GI_31543551-S | 223.7  | 336.7  | 292.6  | RIT1     | <a href="#">NM_006912.2</a> | RIT;RIBB;ROC1                    | GTP         | plasma      | signal       |
| GI_31543556-S | 559.2  | 417.4  | 455    | RNU3IP2  | <a href="#">NM_004704.2</a> | U3-55K                           | small       | small       | rRNA         |
| GI_31543557-S | 641.7  | 611.7  | 342.6  | RPH3AL   | <a href="#">NM_006987.2</a> | NOC2                             | cytoskelet  | cytoplasm   | exocytosis   |
| GI_31543558-S | 227    | 274.7  | 204.5  | RSHL2    | <a href="#">NM_031924.3</a> | RSP3;dJ111C20.1                  |             |             |              |
| GI_31543612-S | 628.7  | 525.5  | 616.9  | SCML1    | <a href="#">NM_006746.2</a> |                                  | DNA         |             | embryoge     |
| GI_31543618-S | 4779.4 | 5119.3 | 4890.4 | SFRS1    | <a href="#">NM_006924.3</a> | ASF;SF2;SRp30a                   | pre-mRNA    | nucleus     | mRNA         |
| GI_31543619-S | 1318.6 | 1897.8 | 1595.6 | SGSH     | <a href="#">NM_000199.2</a> | HSS;SFMD;MPS3A                   | catalytic   | lysosome    | proteoglyc   |
| GI_31543620-S | 746.8  | 738.9  | 403.2  | SH2D2A   | <a href="#">NM_003975.2</a> | TSAD;F2771                       | SH3/SH2     | soluble     | signal       |
| GI_31543621-S | 1140   | 1467.7 | 1611.5 | ENTPD8   | <a href="#">NM_138793.2</a> | SHAPY;SCAN-1                     |             |             |              |
| GI_31543622-S | 1030.3 | 1581   | 1187.9 | SIL1     | <a href="#">NM_022464.3</a> | BAP                              | chaperone   | endoplas    | intracellula |
| GI_31543623-S | 106.1  | 104.8  | 99.7   | SLC15A2  | <a href="#">NM_021082.2</a> | PEPT2                            | peptide:hy  | integral to | small        |
| GI_31543625-S | 146.6  | 205.2  | 276.9  | SLC1A1   | <a href="#">NM_004170.3</a> | EAAC1;EAAT3                      | L-          | membran     | L-           |
| GI_31543629-S | 4653.5 | 7708   | 5969.4 | SLC20A1  | <a href="#">NM_005415.3</a> | PIT1;GLVR1                       | sodium:ph   | membran     | phosphate    |
| GI_31543631-S | 348.6  | 263.4  | 285.4  | SLC25A19 | <a href="#">NM_021734.3</a> | DNC;MUP1;MCPHA                   | binding     | mitochond   | transport    |
| GI_31543634-S | 96.9   | 104.1  | 89.6   | SLC34A1  | <a href="#">NM_003052.2</a> | NPT2;SLC11;NAPI-3;NPTIIa;SLC17A2 | sodium-     | integral to | phosphate    |
| GI_31543636-S | 3391.3 | 3264.7 | 3760.3 | SLC35A5  | <a href="#">NM_017945.2</a> | FLJ20730                         | nucleotide- | integral to | nucleotide-  |
| GI_31543637-S | 5268.2 | 5434.6 | 4896.8 | SLC38A2  | <a href="#">NM_018976.3</a> | ATA2;SAT2;SNAT2;PRO1068;KIAA1382 | transcripti | membran     | amino        |
| GI_31543639-S | 155.3  | 187.9  | 167.1  | SLC40A1  | <a href="#">NM_014585.3</a> | FPN1;HFE4;MTP1;IREG1;SLC11A3     | iron ion    | mitochond   | iron ion     |
| GI_31543640-S | 185.1  | 209    | 184.6  | SLC7A3   | <a href="#">NM_032803.3</a> | ATRC3;CAT-3;FLJ14541             | amino       | integral to | amino        |



|               |         |        |        |          |                             |                                       |             |              |             |
|---------------|---------|--------|--------|----------|-----------------------------|---------------------------------------|-------------|--------------|-------------|
| GI_31543646-S | 574.2   | 490.7  | 418.4  | SMC6L1   | <a href="#">NM_024624.2</a> | SMC6;FLJ22116                         |             |              |             |
| GI_31543647-S | 958.9   | 1082.6 | 1178.6 | SNRP70   | <a href="#">NM_003089.3</a> | RPU1;U1AP;U170K;U1RNP;RNPU1Z          | pre-mRNA    | ribonucleo   | mRNA        |
| GI_31543651-S | 2242.8  | 2137.1 | 1765.7 | SPOP     | <a href="#">NM_003563.2</a> | TEF2                                  | protein     | nucleus      | mRNA        |
| GI_31543652-S | 13496.4 | 18244  | 14025  | SRP14    | <a href="#">NM_003134.2</a> | ALURBP                                | 7S RNA      | signal       | cotranslati |
| GI_31543654-S | 986.4   | 1167.1 | 1069.3 | SSB      | <a href="#">NM_003142.2</a> |                                       | ribonucleo  | nucleus      | tRNA        |
| GI_31543655-S | 1052    | 1547.9 | 1185.5 | STARD3NL | <a href="#">NM_032016.2</a> | MENTHO;MGC3251                        |             | integral to  |             |
| GI_31543656-S | 423     | 389.9  | 420    | STARD3   | <a href="#">NM_006804.2</a> | CAB1;es64;MLN64                       |             | cytoplasm    | mitochond   |
| GI_31543658-S | 204.6   | 193.1  | 120.9  | STARD8   | <a href="#">NM_014725.2</a> | KIAA0189                              | GTPase      |              |             |
| GI_31543660-S | 101.4   | 107.3  | 112.9  | STARS    | <a href="#">NM_139166.2</a> |                                       |             |              |             |
| GI_31543661-S | 297.8   | 366.2  | 306.2  | STK17B   | <a href="#">NM_004226.2</a> | DRAK2                                 | protein     | nucleus      | induction   |
| GI_31543664-S | 847.6   | 859.5  | 692.5  | STOML1   | <a href="#">NM_004809.3</a> | SLP-1;STORP;hUNC-24                   |             |              |             |
| GI_31543665-S | 729.4   | 780.7  | 629.3  | STX5A    | <a href="#">NM_003164.2</a> |                                       |             |              | nonselecti  |
| GI_31543666-S | 541.8   | 387.3  | 371.3  | SUPV3L1  | <a href="#">NM_003171.2</a> | SUV3                                  | helicase    | mitochond    |             |
| GI_31543802-S | 119.8   | 114.2  | 101.7  | TCP11    | <a href="#">NM_018679.2</a> | D6S230E                               |             |              | developm    |
| GI_31543803-S | 92.1    | 100.9  | 82.5   | TFPI2    | <a href="#">NM_006528.2</a> | PP5;TFPI-2                            | extracellul | extracellul  | blood       |
| GI_31543809-S | 1726.6  | 638.7  | 370.7  | TIE      | <a href="#">NM_005424.2</a> | TIE1;JTK14                            | transmem    | integral to  | mesoderm    |
| GI_31543810-S | 157.8   | 182.8  | 155.1  | TMG3     | <a href="#">NM_024082.2</a> |                                       | calcium     | extracellul  | biological_ |
| GI_31543813-S | 19540.3 | 22859  | 15648  | TMSB10   | <a href="#">NM_021103.2</a> |                                       | actin       | cytoskelet   | spermatid   |
| GI_31543814-S | 406.6   | 421.8  | 514.5  | TOE1     | <a href="#">NM_025077.2</a> | FLJ13949                              | nucleic     |              |             |
| GI_31543816-S | 1209.6  | 1267.2 | 1439.8 | TOR3A    | <a href="#">NM_022371.2</a> | ADIR;ADIR2;FLJ22345                   |             |              |             |
| GI_31543817-S | 128.3   | 130.9  | 114.8  | TP73L    | <a href="#">NM_003722.3</a> | KET;LMS;p51;p63;EEC3;TP63;p73H;p73L;S |             |              | induction   |
| GI_31543820-S | 1537.3  | 1577.8 | 749.6  | TPST2    | <a href="#">NM_003595.2</a> |                                       | protein-    | Golgi        | peptidyl-   |
| GI_31543822-S | 5340.4  | 5954.2 | 5061.5 | TRAM1    | <a href="#">NM_014294.3</a> | TRAM;TRAMP                            | endoplas    | integral to  | cotranslati |
| GI_31543823-S | 481.1   | 709    | 934    | TREM1    | <a href="#">NM_018643.2</a> |                                       | receptor    | plasma       | humoral     |
| GI_31543824-S | 147.4   | 157.9  | 172.9  | TSARG2   | <a href="#">NM_144644.2</a> | MGC33432                              |             |              |             |
| GI_31543826-A | 4703    | 3673.8 | 3011.1 | TSC22    | <a href="#">NM_006022.2</a> | MGC17597                              | transcripti | nucleus      | transcripti |
| GI_31543826-I | 1922.3  | 1669.2 | 1053   | TSC22    | <a href="#">NM_006022.2</a> | MGC17597                              | transcripti | nucleus      | transcripti |
| GI_31543827-S | 109.3   | 113.7  | 119.6  | TSCOT    | <a href="#">NM_033051.2</a> |                                       | symporter   | integral to  | tetracyclin |
| GI_31543829-S | 134.2   | 154.5  | 139.6  | TSP50    | <a href="#">NM_013270.2</a> |                                       | trypsin     |              | proteolysis |
| GI_31543835-S | 149.4   | 175.4  | 162.5  | TXNDC3   | <a href="#">NM_016616.2</a> | NME8;SPTRX2;Sptrx-2                   | nucleoside- |              | electron    |
| GI_31543907-S | 1514.8  | 1788   | 1869.8 | UBP1     | <a href="#">NM_014517.2</a> | LBP-1B;LBP-1a                         | transcripti |              | viral       |
| GI_31543909-S | 841.1   | 613.2  | 700    | USP1     | <a href="#">NM_003368.3</a> |                                       | ubiquitin-  |              | deubiquiti  |
| GI_31543911-S | 339.1   | 374.9  | 361.8  | USP20    | <a href="#">NM_006676.2</a> | VDU2;KIAA1003                         | cysteine-   | cellular_co  | ubiquitin-  |
| GI_31543930-S | 179.2   | 196.8  | 174.6  | VAMP5    | <a href="#">NM_006634.2</a> | MYOBREVIN                             |             | integral to  | nonselecti  |
| GI_31543932-S | 263.7   | 319    | 280.9  | VGLL1    | <a href="#">NM_016267.2</a> | TDU;VGL1                              | transcripti | nucleus      | regulation  |
| GI_31543933-S | 139     | 148.7  | 134.4  | VMP      | <a href="#">NM_080723.2</a> | p24                                   |             |              |             |
| GI_31543935-S | 208.6   | 209.6  | 216.7  | VRK2     | <a href="#">NM_006296.2</a> |                                       | protein     | integral to  | protein     |
| GI_31543966-S | 435.2   | 335.2  | 405.5  | XPA      | <a href="#">NM_000380.2</a> | XP1;XPAC                              | damaged     | nucleus      | nucleotide- |
| GI_31543977-S | 176.7   | 240.6  | 237.1  | ZHX2     | <a href="#">NM_014943.2</a> | KIAA0854                              | transcripti | nucleus      | regulation  |
| GI_31543978-S | 83.8    | 100.6  | 97.5   | ZNF145   | <a href="#">NM_006006.3</a> | PLZF                                  | transcripti | nucleus      | mesoderm    |
| GI_31543982-S | 329.1   | 369.1  | 438.9  | ZNF289   | <a href="#">NM_032389.2</a> | IRZ;Zfp289;FLJ14576                   | DNA         | nucleus      |             |
| GI_31543986-S | 313.1   | 337.8  | 308.3  | ZNF350   | <a href="#">NM_021632.2</a> | ZFQR;ZBRK1                            | nucleic     | intracellula | regulation  |
| GI_31543988-S | 82.3    | 91.4   | 87.4   | ZNF382   | <a href="#">NM_032825.2</a> | KS1;FLJ14686                          | nucleic     | intracellula | regulation  |
| GI_31543989-S | 162.8   | 118.5  | 176.9  | ZNF443   | <a href="#">NM_005815.2</a> | ZK1                                   | nucleic     | nucleus      | induction   |

|               |        |        |        |            |                             |                                      |             |              |             |
|---------------|--------|--------|--------|------------|-----------------------------|--------------------------------------|-------------|--------------|-------------|
| GI_31544070-S | 151.3  | 157.8  | 150.6  | ZNF481     | <a href="#">NM_020924.2</a> | bioref;KIAA1572                      | protein     | nucleus      | regulation  |
| GI_31559770-S | 124.6  | 150    | 142.5  | ODF3       | <a href="#">NM_053280.3</a> | SHIPPO1;hSHIPPO                      |             |              |             |
| GI_31559774-S | 1060.4 | 1241.5 | 1029.4 | USP38      | <a href="#">NM_032557.4</a> | HP43.8KD;KIAA1891                    | cysteine-   |              | ubiquitin-  |
| GI_31559779-S | 108.2  | 126.8  | 106.8  | DKFZp547D2 | <a href="#">NM_153685.2</a> |                                      |             |              |             |
| GI_31559780-S | 110.4  | 100.9  | 97.6   | STRC       | <a href="#">NM_153700.2</a> | DFNB16                               |             |              |             |
| GI_31559781-S | 112.7  | 111    | 99.7   | FLJ90036   | <a href="#">NM_153691.2</a> |                                      |             |              |             |
| GI_31559782-S | 121.3  | 112.9  | 116.2  | SYCP3      | <a href="#">NM_153694.2</a> | COR1;SCP3                            |             |              |             |
| GI_31559784-S | 129.3  | 140.6  | 143.7  | TTL        | <a href="#">NM_153712.2</a> | MGC46235                             | tubulin-    |              | protein     |
| GI_31559785-S | 446    | 544.5  | 439    | PP784      | <a href="#">NM_152301.3</a> | MGC9651                              |             |              |             |
| GI_31559786-S | 272.8  | 281.8  | 331.1  | MGC33648   | <a href="#">NM_153706.2</a> |                                      |             |              |             |
| GI_31559787-S | 112.9  | 152.9  | 115.2  | FLJ30277   | <a href="#">NM_153008.3</a> |                                      | DNA         | nucleus      | regulation  |
| GI_31559788-S | 299.2  | 383.8  | 358.7  | ODF4       | <a href="#">NM_153007.3</a> | OPPO1                                |             |              |             |
| GI_31559820-S | 207.4  | 183.6  | 145.4  | GJE1       | <a href="#">NM_181538.1</a> | Cx29                                 | connexon    | connexon     | cell        |
| GI_31559824-S | 107.9  | 104    | 98.2   | PKD1L3     | <a href="#">NM_181536.1</a> |                                      | cation      | membran      | cation      |
| GI_31560860-S | 93     | 108.1  | 77.5   | KAAG1      | <a href="#">NM_181337.2</a> | RU2;RU2AS                            | defense/i   | cellular_co  | immune      |
| GI_31560862-S | 118.6  | 131.7  | 120    | SYT2       | <a href="#">NM_177402.3</a> | SytII                                | transporte  | membran      | transport   |
| GI_31560863-S | 107.7  | 130.5  | 113.1  | FLJ36180   | <a href="#">NM_178556.3</a> |                                      |             |              |             |
| GI_31560865-S | 257    | 325.9  | 276.7  | MGC30208   | <a href="#">NM_173804.3</a> |                                      |             |              |             |
| GI_31560866-S | 94.9   | 87.7   | 76     | CESK1      | <a href="#">NM_014406.3</a> |                                      | ATP         |              | protein     |
| GI_31560867-S | 846.3  | 1478.6 | 917.6  | ITM2C      | <a href="#">NM_030926.3</a> | E25;BR13;E25C;ITM3;BRICD2C;HRPC.1050 |             |              |             |
| GI_31563329-I | 205.1  | 265.9  | 232.7  | AKAP13     | <a href="#">NM_006738.4</a> | BRX;LBC;Ht31;c-lbc;AKAP-             | protein     | membran      | oncogene    |
| GI_31563332-A | 1163.2 | 1226.9 | 1170.5 | AKAP13     | <a href="#">NM_144767.3</a> | BRX;LBC;Ht31;c-lbc;AKAP-             | protein     | membran      | oncogene    |
| GI_31563333-I | 94.2   | 102.7  | 83.9   | FOXK2      | <a href="#">NM_181430.1</a> | ILF;ILF1;ILF-1                       | RNA         | nucleus      | regulation  |
| GI_31563335-A | 209.8  | 240.7  | 251.7  | FOXK2      | <a href="#">NM_181431.1</a> | ILF;ILF1;ILF-1                       | RNA         | nucleus      | regulation  |
| GI_31563349-A | 138.5  | 153    | 143.9  | PAX3       | <a href="#">NM_013942.2</a> | WS1;CDHS;HUP2                        | transcripti |              | hearing     |
| GI_31563350-I | 107.2  | 136.8  | 116.5  | PAX3       | <a href="#">NM_000438.3</a> | WS1;CDHS;HUP2                        | transcripti |              | hearing     |
| GI_31563359-I | 182.1  | 201.4  | 172.9  | MRPL55     | <a href="#">NM_181462.1</a> |                                      |             |              |             |
| GI_31563365-A | 402.2  | 423.1  | 412.8  | MRPL55     | <a href="#">NM_181465.1</a> |                                      |             |              |             |
| GI_31563367-I | 97.7   | 107.2  | 104.2  | KIAA1847   | <a href="#">NM_032527.2</a> | FLJ14972;MGC44880;dJ583P15.3         | nucleic     | intracellula | regulation  |
| GI_31563369-I | 81.7   | 101.6  | 90.8   | KIAA1847   | <a href="#">NM_181484.1</a> | FLJ14972;MGC44880;dJ583P15.3         | nucleic     | intracellula | regulation  |
| GI_31563371-A | 683.7  | 761.1  | 1156.1 | KIAA1847   | <a href="#">NM_181485.1</a> | FLJ14972;MGC44880;dJ583P15.3         | nucleic     | intracellula | regulation  |
| GI_31563373-I | 110.5  | 118.3  | 125.6  | ITGB4BP    | <a href="#">NM_181466.1</a> | CAB;EIF6;EIF3A;p27BBP;b(2)gcn        | translation | peripheral   | translation |
| GI_31563375-A | 5241   | 4907.7 | 6301.7 | ITGB4BP    | <a href="#">NM_181467.1</a> | CAB;EIF6;EIF3A;p27BBP;b(2)gcn        | translation | peripheral   | translation |
| GI_31563384-S | 102.3  | 99.7   | 107    | SOX14      | <a href="#">NM_004189.2</a> | SOX28                                | transcripti | chromatin    | neurogene   |
| GI_31563385-A | 286.8  | 382.7  | 317.2  | SULT2B1    | <a href="#">NM_177973.1</a> | HSST2                                | sulfotransf | cytoplasm    | steroid     |
| GI_31563385-I | 294.5  | 321.1  | 312.4  | SULT2B1    | <a href="#">NM_177973.1</a> | HSST2                                | sulfotransf | cytoplasm    | steroid     |
| GI_31563387-I | 82.9   | 89.7   | 73.3   | SULT2B1    | <a href="#">NM_004605.2</a> | HSST2                                | sulfotransf | cytoplasm    | steroid     |
| GI_31563411-A | 153.9  | 176.5  | 167.9  | CKLFSF1    | <a href="#">NM_181289.1</a> | CKLFH;CKLFH1;CKLFH1a                 | transporte  | membran      | transport   |
| GI_31563435-S | 98.7   | 110.8  | 96.6   | CKLFSF2    | <a href="#">NM_144673.2</a> | FLJ25732;MGC39436                    | cytokine    | membran      | chemotaxi   |
| GI_31563501-S | 3181.4 | 3022.8 | 3367.3 | ACAT1      | <a href="#">NM_000019.2</a> | T2;MAT;ACAT;THIL                     | acetyl-     | mitochond    |             |
| GI_31563502-A | 674.8  | 789    | 863.8  | ADNP       | <a href="#">NM_181442.1</a> | KIAA0784                             | transcripti | nucleus      | regulation  |
| GI_31563504-I | 144    | 152.8  | 142.6  | ADNP       | <a href="#">NM_015339.2</a> | KIAA0784                             | transcripti | nucleus      | regulation  |
| GI_31563505-S | 134.2  | 161.6  | 159.5  | AMID       | <a href="#">NM_032797.4</a> | PRG3;FLJ14497                        | disulfide   |              | electron    |
| GI_31563510-S | 149.1  | 145.8  | 146.7  | GTPBP5     | <a href="#">NM_015666.2</a> | FLJ10741;MGC29512;dJ1005F21.2        | GTP         |              |             |

|               |        |        |        |          |                             |                                     |             |             |             |
|---------------|--------|--------|--------|----------|-----------------------------|-------------------------------------|-------------|-------------|-------------|
| GI_31563511-I | 121.8  | 126.3  | 123    | NAT5     | <a href="#">NM_181527.1</a> | ARD1;dJ1002M8.1                     | acyltransf  |             |             |
| GI_31563513-A | 5812.1 | 5423.8 | 2687.8 | NAT5     | <a href="#">NM_181528.1</a> | ARD1;dJ1002M8.1                     | acyltransf  |             |             |
| GI_31563516-S | 102.4  | 110.9  | 92.5   | NTS      | <a href="#">NM_006183.3</a> | NN;NT;NT/N;NTS1;NMN-125             | peptide     | soluble     | signal      |
| GI_31563517-A | 169    | 226.4  | 213.9  | MAP1LC3A | <a href="#">NM_181509.1</a> | MAP1ALC3;MAP1BLC3                   |             |             |             |
| GI_31563517-I | 123.4  | 150.5  | 125.6  | MAP1LC3A | <a href="#">NM_181509.1</a> | MAP1ALC3;MAP1BLC3                   |             |             |             |
| GI_31563519-I | 134.6  | 164.6  | 130.8  | MAP1LC3A | <a href="#">NM_032514.2</a> | MAP1ALC3;MAP1BLC3                   |             |             |             |
| GI_31563520-S | 418.6  | 375.2  | 232.1  | MGC10715 | <a href="#">NM_024325.4</a> | FLJ39592;MGC20504;dJ734P14.5        |             |             |             |
| GI_31563522-I | 382.9  | 660.8  | 546.4  | MYL9     | <a href="#">NM_006097.3</a> | LC20;MLC2;MRLC1;MYRL2;MGC3505       | structural  | muscle      | regulation  |
| GI_31563523-A | 415.6  | 727.7  | 559.2  | MYL9     | <a href="#">NM_181526.1</a> | LC20;MLC2;MRLC1;MYRL2;MGC3505       | structural  | muscle      | regulation  |
| GI_31563525-S | 102.1  | 950.8  | 173.3  | SLC24A3  | <a href="#">NM_020689.3</a> | NCKX3                               | symporter   | integral to | sodium      |
| GI_31563527-I | 188.8  | 238.8  | 204.8  | SPINLW1  | <a href="#">NM_181502.1</a> | WAP7;EPPIN;WFDC7;EPPIN1;EPPIN2;EPPI | serine      |             |             |
| GI_31563529-A | 477.6  | 580.9  | 517    | SPINLW1  | <a href="#">NM_020398.2</a> | WAP7;EPPIN;WFDC7;EPPIN1;EPPIN2;EPPI | serine      |             |             |
| GI_31563529-I | 129.9  | 139    | 118.5  | SPINLW1  | <a href="#">NM_020398.2</a> | WAP7;EPPIN;WFDC7;EPPIN1;EPPIN2;EPPI | serine      |             |             |
| GI_31563530-S | 1140.7 | 1060.8 | 1023.1 | STAG2    | <a href="#">NM_006603.3</a> | SA2;SA-2                            |             | nucleus     | meiosis     |
| GI_31563532-S | 114.8  | 115.6  | 98.2   | RAD52B   | <a href="#">NM_145654.2</a> | MGC33977                            | nucleic     |             |             |
| GI_31563533-I | 317    | 295.5  | 345.1  | RFC2     | <a href="#">NM_181471.1</a> | A1;RFC40;MGC3665                    | ATP         | DNA         | DNA         |
| GI_31563535-A | 364    | 383.5  | 336.2  | RFC2     | <a href="#">NM_002914.3</a> | A1;RFC40;MGC3665                    | ATP         | DNA         | DNA         |
| GI_31563536-S | 569.6  | 743.8  | 651.8  | CLASP1   | <a href="#">NM_015282.1</a> | MAST1;KIAA0622                      |             |             |             |
| GI_31563538-S | 282.5  | 313.5  | 282    | WFDC10A  | <a href="#">NM_080753.2</a> | WAP10;C20orf146;dJ688G8.3           | serine      |             |             |
| GI_31563539-I | 181.9  | 157    | 144.8  | WFDC10B  | <a href="#">NM_172006.2</a> | WAP12                               |             |             |             |
| GI_31563540-A | 104.4  | 103.9  | 103.9  | WFDC10B  | <a href="#">NM_172131.2</a> | WAP12                               |             |             |             |
| GI_31563541-S | 125.4  | 144    | 132    | WFDC11   | <a href="#">NM_147197.2</a> | WAP11                               |             |             |             |
| GI_31581519-S | 325.8  | 348.7  | 252.3  | C20orf99 | <a href="#">NM_033089.4</a> | ZCCHC3;FLJ22115;dJ1103G7.7          | nucleic     | nucleus     | regulation  |
| GI_31581520-S | 96.8   | 101    | 110.4  | MT1E     | <a href="#">NM_175617.2</a> | MT1;MTD                             | heavy       |             | heavy       |
| GI_31581523-S | 129    | 144.5  | 157.7  | COBL     | <a href="#">NM_015198.2</a> | KIAA0633                            |             |             |             |
| GI_31581525-S | 290.8  | 386.1  | 338.6  | SSX9     | <a href="#">NM_174962.2</a> |                                     |             |             |             |
| GI_31581528-S | 606    | 747.3  | 745.7  | SSX8     | <a href="#">NM_174961.2</a> |                                     |             |             |             |
| GI_31581540-S | 114.8  | 126.9  | 118.3  | FLJ38973 | <a href="#">NM_153689.3</a> |                                     |             |             |             |
| GI_31581548-S | 92.2   | 95.5   | 85.4   | KRT25B   | <a href="#">NM_181539.2</a> |                                     |             | intermedia  |             |
| GI_31581550-S | 128.9  | 138.7  | 133    | KRT25C   | <a href="#">NM_181537.2</a> |                                     |             | intermedia  |             |
| GI_31581551-S | 86.9   | 85.4   | 89.9   | KRT25D   | <a href="#">NM_181535.2</a> |                                     |             | intermedia  |             |
| GI_31581553-S | 131.9  | 153.8  | 135    | KRT25A   | <a href="#">NM_181534.2</a> |                                     |             | intermedia  |             |
| GI_31581555-S | 137.9  | 162.2  | 149    | ERAS     | <a href="#">NM_181532.2</a> | HRAS2;HRASP                         | RAS small   |             | protein     |
| GI_31581597-S | 99.3   | 110    | 112.7  | C6orf150 | <a href="#">NM_138441.1</a> |                                     |             |             |             |
| GI_31621295-I | 806.6  | 701.2  | 714.5  | CPR8     | <a href="#">NM_020739.1</a> | KIAA1254                            |             |             |             |
| GI_31621298-S | 104.7  | 111.1  | 106.8  | FLJ23059 | <a href="#">NM_032234.2</a> |                                     |             |             |             |
| GI_31621304-S | 414.1  | 488    | 383    | LRPPRC   | <a href="#">NM_133259.2</a> | LSFC;GP130;LRP130;CLONE-23970       | molecular   | cellular_co | biological_ |
| GI_31621308-S | 145.2  | 123.5  | 130.5  | TSLRP    | <a href="#">NM_012472.3</a> |                                     |             |             |             |
| GI_31652216-S | 157.6  | 173.4  | 152.4  | SLC25A16 | <a href="#">NM_152707.2</a> | GDA;GDC;ML7;hML7;HGT.1;D10S105E;MG  | carrier     | mitochond   | small       |
| GI_31652217-I | 578.1  | 652    | 651.7  | SURF5    | <a href="#">NM_181491.1</a> | MGC48682                            |             | soluble     |             |
| GI_31652219-A | 1453.3 | 879.7  | 1035   | SURF5    | <a href="#">NM_133640.3</a> | MGC48682                            |             | soluble     |             |
| GI_31652221-I | 205.3  | 204.3  | 159    | MRPL21   | <a href="#">NM_181512.1</a> |                                     |             |             |             |
| GI_31652223-A | 5152   | 4274   | 3413   | MRPL21   | <a href="#">NM_181513.1</a> |                                     |             |             |             |
| GI_31652229-S | 121.9  | 147    | 120.3  | TBX20    | <a href="#">NM_020417.1</a> |                                     | transcripti | nucleus     | regulation  |

|               |        |        |        |          |                             |                                        |             |              |             |
|---------------|--------|--------|--------|----------|-----------------------------|----------------------------------------|-------------|--------------|-------------|
| GI_31652231-I | 163.6  | 166.9  | 151.1  | TBX5     | <a href="#">NM_181486.1</a> | HOS                                    | RNA         |              | heart       |
| GI_31652237-A | 146.2  | 163.5  | 175.7  | CUTL1    | <a href="#">NM_181500.1</a> | CDP;CUX;p75;CASP;COY1;p100;p110;p200   | RNA         |              | regulation  |
| GI_31652239-I | 146.5  | 160.7  | 169.3  | CUTL1    | <a href="#">NM_181552.1</a> | CDP;CUX;p75;CASP;COY1;p100;p110;p200   | RNA         |              | regulation  |
| GI_31652241-A | 553.4  | 467.6  | 473.4  | TCF20    | <a href="#">NM_181492.1</a> | AR1;SPBP;KIAA0292                      | RNA         | nucleus      | proteolysis |
| GI_31652243-I | 134.9  | 133.5  | 129.9  | TCF20    | <a href="#">NM_005650.1</a> | AR1;SPBP;KIAA0292                      | RNA         | nucleus      | proteolysis |
| GI_31652245-I | 539.7  | 849.3  | 975.8  | TNFRSF19 | <a href="#">NM_148957.2</a> | TAJ;TROY;TRADE;TAJ-alpha               | tumor       | integral to  | JNK         |
| GI_31652246-S | 704.9  | 446.5  | 451.2  | STXBP5   | <a href="#">NM_139244.2</a> | LGL3                                   |             |              |             |
| GI_31652248-S | 94.6   | 144.9  | 108.1  | LBP      | <a href="#">NM_004139.2</a> | MGC22233                               | lipid       | integral to  | response    |
| GI_31652250-S | 334.8  | 301.7  | 259.5  | LOC51244 | <a href="#">NM_016474.3</a> |                                        |             |              |             |
| GI_31652253-S | 118.2  | 123.1  | 114.7  | MAK      | <a href="#">NM_005906.3</a> | dJ417M14.2                             | ATP         |              | protein     |
| GI_31652254-S | 135.4  | 175.7  | 125.1  | LYG2     | <a href="#">NM_175735.3</a> | LYGH                                   | lysozyme    |              | cell wall   |
| GI_31652256-S | 522.5  | 497.8  | 190.3  | MAFB     | <a href="#">NM_005461.3</a> | KRML;MGC43127                          | DNA         | nucleus      | sensory     |
| GI_31652257-S | 203.9  | 225.7  | 219.2  | MOCS3    | <a href="#">NM_014484.3</a> | MGC9252;dJ914P20.3                     | ligase      |              | Mo-         |
| GI_31652258-S | 1088.4 | 1435   | 1444.4 | MUM1     | <a href="#">NM_032853.2</a> | MUM-1;HSPC211;FLJ14868;FLJ22283        |             |              |             |
| GI_31652260-S | 205.3  | 278.7  | 422.9  | MYBL2    | <a href="#">NM_002466.2</a> | BMYB;MGC15600                          | transcripti | chromatin    | anti-       |
| GI_31652261-S | 121.4  | 125.5  | 105.2  | C2F      | <a href="#">NM_006331.3</a> |                                        | molecular   | nucleus      | rRNA        |
| GI_31652263-S | 288.5  | 322.9  | 304.1  | C13orf10 | <a href="#">NM_022118.3</a> | SE70-2;PRO1777;FLJ20957                |             |              |             |
| GI_31657091-S | 108.2  | 101.7  | 123.4  | ABCA13   | <a href="#">NM_152701.2</a> | FLJ33876;FLJ33951                      | ATP-        | membran      | transport   |
| GI_31657093-S | 430.9  | 434    | 583    | ANLN     | <a href="#">NM_018685.2</a> | Scraps;ANILLIN                         | actin       |              | regulation  |
| GI_31657095-A | 97.3   | 99.7   | 87.1   | CKLFSF4  | <a href="#">NM_181521.1</a> |                                        | cytokine    | membran      | chemotaxi   |
| GI_31657095-I | 138    | 153.9  | 155.8  | CKLFSF4  | <a href="#">NM_181521.1</a> |                                        | cytokine    | membran      | chemotaxi   |
| GI_31657097-I | 934.8  | 845.3  | 728.1  | CKLFSF7  | <a href="#">NM_138410.2</a> | FLJ30992                               | transporte  | membran      | transport   |
| GI_31657098-A | 9143.8 | 7456.4 | 6245.2 | CKLFSF7  | <a href="#">NM_181472.1</a> | FLJ30992                               | transporte  | membran      | transport   |
| GI_31657100-A | 449.4  | 416.7  | 461.9  | WDR23    | <a href="#">NM_181357.1</a> | GL014;PRO2389                          |             |              |             |
| GI_31657102-I | 133.6  | 139.8  | 121.8  | WDR23    | <a href="#">NM_025230.3</a> | GL014;PRO2389                          |             |              |             |
| GI_31657104-I | 127.8  | 141.2  | 128.5  | WFDC8    | <a href="#">NM_181510.1</a> | WAP8;C20orf170;dJ461P17.1              | serine      |              |             |
| GI_31657106-A | 94.7   | 98.6   | 101.4  | WFDC8    | <a href="#">NM_130896.1</a> | WAP8;C20orf170;dJ461P17.1              | serine      |              |             |
| GI_31657106-I | 92     | 100.2  | 88.9   | WFDC8    | <a href="#">NM_130896.1</a> | WAP8;C20orf170;dJ461P17.1              | serine      |              |             |
| GI_31657108-S | 291.8  | 306.9  | 288.9  | ZNF282   | <a href="#">NM_003575.1</a> | HUB1                                   | zinc ion    | nucleus      | regulation  |
| GI_31657110-S | 988.3  | 1157.6 | 1099.3 | ZNF294   | <a href="#">NM_015565.1</a> | C21orf10;C21orf98;FLJ11053;KIAA0714    |             |              |             |
| GI_31657112-S | 145.4  | 146.7  | 151.9  | ZNFN1A1  | <a href="#">NM_006060.2</a> | IK1;LYF1;hIk-1;IKAROS;PRO0758;Hs.54452 | DNA         |              | mesoderm    |
| GI_31657113-S | 230.7  | 144.1  | 157.3  | ARMC4    | <a href="#">NM_018076.2</a> | FLJ10376;FLJ10817;DKFZP434P1735        |             |              |             |
| GI_31657115-A | 648.6  | 624.1  | 565.4  | KIAA2010 | <a href="#">NM_017936.2</a> | MSTP033;FLJ20707                       |             |              |             |
| GI_31657115-I | 107.2  | 105.2  | 104.1  | KIAA2010 | <a href="#">NM_017936.2</a> | MSTP033;FLJ20707                       |             |              |             |
| GI_31657116-I | 99.5   | 114.6  | 98.8   | KIAA2010 | <a href="#">NM_032560.3</a> | MSTP033;FLJ20707                       |             |              |             |
| GI_31657118-S | 101.6  | 112    | 106.6  | FLJ23598 | <a href="#">NM_024783.2</a> |                                        | carboxype   |              | proteolysis |
| GI_31657120-S | 222.3  | 222.6  | 262.2  | HIC2     | <a href="#">NM_015094.1</a> | HRG22;KIAA1020                         | protein     | nucleus      | regulation  |
| GI_31657122-I | 93.1   | 87.8   | 85.4   | HPS5     | <a href="#">NM_181507.1</a> | AIBP63;KIAA1017                        |             |              |             |
| GI_31657124-A | 428.2  | 461.3  | 451    | HPS5     | <a href="#">NM_181508.1</a> | AIBP63;KIAA1017                        |             |              |             |
| GI_31657128-S | 788.2  | 617.7  | 602    | PFAS     | <a href="#">NM_012393.1</a> | PURL;FGAMS;FGARAT;KIAA0361             | ATP         | cytoplasm    | purine      |
| GI_31657130-S | 367.7  | 449.9  | 442.8  | PI3      | <a href="#">NM_002638.2</a> | ESI;WAP3;SKALP;WFDC14;MGC13613         | protein     | extracellul  | copulation  |
| GI_31657133-S | 96.3   | 95.2   | 77.8   | FRK      | <a href="#">NM_002031.2</a> | GTK;RAK;PTK5                           | non-        | intracellula | negative    |
| GI_31657134-S | 379.9  | 378.2  | 410.6  | FRS3     | <a href="#">NM_006653.3</a> | SNT2;FRS2B;SNT-2;FRS2beta;MGC17167     | insulin     | peripheral   | FGF         |
| GI_31657135-A | 91.6   | 81.7   | 79.7   | FSHR     | <a href="#">NM_181446.1</a> | LGR1;ODG1;FSHRO                        | follicle    | integral to  | female      |

|               |         |        |        |           |                             |                                       |             |              |              |
|---------------|---------|--------|--------|-----------|-----------------------------|---------------------------------------|-------------|--------------|--------------|
| GI_31657137-I | 203.9   | 228.6  | 204    | FSHR      | <a href="#">NM_000145.2</a> | LGR1;ODG1;FSHRO                       | follicle    | integral to  | female       |
| GI_31657139-S | 163.9   | 208.7  | 179.7  | INSRR     | <a href="#">NM_014215.1</a> | IRR                                   | transmem    | integral to  | protein      |
| GI_31657141-S | 318.7   | 361.3  | 276.8  | ITGA1     | <a href="#">NM_181501.1</a> | VLA1;CD49a                            | collagen    | integrin     | integrin-    |
| GI_31657143-A | 2815.1  | 3186.5 | 1741.8 | ITPA      | <a href="#">NM_181493.1</a> | ITPase;C20orf37;dJ794I6.3;HLC14-06-P  |             |              |              |
| GI_31657146-S | 98.9    | 99.2   | 98.4   | ITR       | <a href="#">NM_180989.3</a> |                                       |             |              |              |
| GI_31711991-S | 647.9   | 699.4  | 698    | DLAT      | <a href="#">NM_001931.2</a> | DLTA;PDC-E2                           | dihydrolip  | mitochond    |              |
| GI_31712019-S | 153.3   | 160.4  | 135    | SPATA3    | <a href="#">NM_139073.2</a> | TSARG1                                |             |              |              |
| GI_31712021-S | 340.8   | 440    | 341.8  | HUMAGCGB  | <a href="#">NM_013286.2</a> |                                       |             |              |              |
| GI_31742475-S | 90.8    | 92.6   | 93.8   | RGS6      | <a href="#">NM_004296.3</a> | GAP                                   | GTPase      | peripheral   | regulation   |
| GI_31742479-I | 291.6   | 253.8  | 226.2  | YWHAB     | <a href="#">NM_003404.3</a> | HS1;GW128;KCIP-1                      | protein     |              |              |
| GI_31742480-A | 10013.6 | 11064  | 13439  | YWHAB     | <a href="#">NM_139323.2</a> | HS1;GW128;KCIP-1                      | protein     |              |              |
| GI_31742481-S | 170.3   | 201.1  | 179.6  | ARSF      | <a href="#">NM_004042.3</a> | ASF                                   | arylsulfata |              | metabolis    |
| GI_31742483-S | 539.1   | 560.6  | 574.6  | EDRF1     | <a href="#">NM_015608.2</a> | FLJ21617;DKFZp586F1019                |             |              |              |
| GI_31742485-S | 187.2   | 276.1  | 208.4  | EGLN3     | <a href="#">NM_022073.2</a> | PHD3;HIFPH3;FLJ21620                  | oxidoredu   | nucleus      | protein      |
| GI_31742486-S | 1023.5  | 1538.1 | 1901.8 | KIF3B     | <a href="#">NM_004798.2</a> | HH0048;KIAA0359                       | plus-end-   | plus-end     | anterogra    |
| GI_31742489-S | 120.3   | 129.9  | 107.2  | GABRG1    | <a href="#">NM_173536.2</a> | MGC33838                              | extracellul | integral to  | chloride     |
| GI_31742491-S | 749     | 895.1  | 803    | N4BP2     | <a href="#">NM_018177.2</a> | B3BP;FLJ10680;KIAA1413                | damaged     |              | mismatch     |
| GI_31742495-S | 681.9   | 437    | 354.2  | PP35      | <a href="#">NM_181581.1</a> |                                       | molecular   |              |              |
| GI_31742497-S | 122.6   | 126.9  | 138.4  | UNC84B    | <a href="#">NM_015374.1</a> | SUN2;KIAA0668                         | microtubul  | kinesin      | mitotic      |
| GI_31742500-S | 2073    | 2174.7 | 2014.9 | SNX27     | <a href="#">NM_030918.4</a> | MY014;KIAA0488;MGC20471               | protein     |              | neuropepti   |
| GI_31742502-S | 90.6    | 106.7  | 75     | HIST2H3C  | <a href="#">NM_021059.2</a> | H3;H3.2;H3/M;H3F2;H3FM;MGC9629        |             |              |              |
| GI_31742504-S | 114.5   | 103.2  | 93.1   | KIAA0861  | <a href="#">NM_015078.2</a> |                                       |             |              |              |
| GI_31742506-A | 1326.1  | 1058.2 | 909    | UPP1      | <a href="#">NM_003364.2</a> | UP;UPP;UPASE;UDRPASE                  | uridine     |              | nucleobas    |
| GI_31742506-I | 127.1   | 131.7  | 132.6  | UPP1      | <a href="#">NM_003364.2</a> | UP;UPP;UPASE;UDRPASE                  | uridine     |              | nucleobas    |
| GI_31742507-I | 136.4   | 107.9  | 115.2  | UPP1      | <a href="#">NM_181597.1</a> | UP;UPP;UPASE;UDRPASE                  | uridine     |              | nucleobas    |
| GI_31742512-I | 150.6   | 184.8  | 165.9  | SPG3A     | <a href="#">NM_181598.1</a> | FSP1;GBP3;SPG3;AD-FSP                 | GTPase      | nucleus      | immune       |
| GI_31742514-A | 129.7   | 127    | 114.3  | FRDA      | <a href="#">NM_000144.3</a> | FA;Fxn;X25;FARR;MGC57199;frataxin     | iron ion    | mitochond    | iron ion     |
| GI_31742527-S | 212.4   | 205.2  | 169.9  | SBZF3     | <a href="#">NM_020394.2</a> |                                       | nucleic     | intracellula | regulation   |
| GI_31742529-I | 1426.7  | 1721.2 | 1748.5 | APG16L    | <a href="#">NM_030803.5</a> | WDR30;FLJ00045;FLJ10035;FLJ10828;FLJ2 |             |              |              |
| GI_31742531-S | 2066.9  | 2011.4 | 2380.3 | DIAPH1    | <a href="#">NM_005219.2</a> | DRF1;DFNA1;LFHL1;hDIA1                | profilin    | kinesin      | hearing      |
| GI_31742533-S | 131.1   | 133.2  | 145.9  | ETV1      | <a href="#">NM_004956.2</a> | ER81                                  | transcripti | nucleus      | oncogene     |
| GI_31742535-S | 332.6   | 232.6  | 169.3  | FIGNL1    | <a href="#">NM_022116.2</a> |                                       | nucleotide  |              |              |
| GI_31745137-S | 107     | 127    | 110.6  | RASA4     | <a href="#">NM_006989.3</a> | GAPL;CAPRI;KIAA0538                   | GTPase      |              | intracellula |
| GI_31745171-S | 96.2    | 105.5  | 103.7  | C6orf10   | <a href="#">NM_006781.2</a> | TSBP                                  |             |              |              |
| GI_31745175-S | 231.1   | 249.2  | 224.6  | LOC51252  | <a href="#">NM_016490.3</a> |                                       |             |              |              |
| GI_31745179-S | 385     | 348.8  | 323    | ARNTL2    | <a href="#">NM_020183.3</a> | CLIF;MOP9;BMAL2                       |             |              |              |
| GI_31745183-S | 81.4    | 94.2   | 98.6   | FLJ39249  | <a href="#">NM_173664.2</a> |                                       | GTP         |              |              |
| GI_31745192-I | 171.6   | 190.9  | 190.5  | B7        | <a href="#">NM_181613.1</a> |                                       |             |              |              |
| GI_31747573-S | 2349.2  | 1968.3 | 1605.5 | GTF2H2    | <a href="#">NM_001515.2</a> | BTF2;TFIIH;BTF2P44;T-BTF2P44          | nucleic     | transcripti  | response     |
| GI_31747574-S | 128.8   | 140.9  | 133.1  | CLECSF5   | <a href="#">NM_013252.2</a> | MDL1;MDL-1                            | binding     | integral to  | cellular     |
| GI_31790997-S | 88.5    | 102.1  | 94.7   | KRTAP15-1 | <a href="#">NM_181623.1</a> | KAP15.1                               |             |              |              |
| GI_31790999-S | 92.2    | 95     | 122.1  | KRTAP23-1 | <a href="#">NM_181624.1</a> | KAP23.1                               |             |              |              |
| GI_31791001-S | 147     | 163.6  | 149.7  | KRTAP13-3 | <a href="#">NM_181622.1</a> | KAP13.3                               |             |              |              |
| GI_31791003-S | 235.4   | 283.8  | 266.1  | KRTAP13-4 | <a href="#">NM_181600.1</a> | KAP13.4                               |             |              |              |

|               |        |        |        |           |                             |                           |              |              |         |            |
|---------------|--------|--------|--------|-----------|-----------------------------|---------------------------|--------------|--------------|---------|------------|
| GI_31791007-S | 106.7  | 116.2  | 111.2  | KRTAP13-1 | <a href="#">NM_181599.1</a> | KAP13.1                   |              |              |         | intermedia |
| GI_31791009-S | 111.9  | 120    | 119.8  | KRTAP21-1 | <a href="#">NM_181619.1</a> | KAP21.1                   |              |              |         |            |
| GI_31791011-S | 96.4   | 95.4   | 93     | KRTAP22-1 | <a href="#">NM_181620.1</a> | KAP22.1                   |              |              |         |            |
| GI_31791013-S | 128.6  | 137.5  | 126.6  | KRTAP20-2 | <a href="#">NM_181616.1</a> | KAP20.2                   |              |              |         |            |
| GI_31791015-S | 105.7  | 113.2  | 92.6   | KRTAP21-2 | <a href="#">NM_181617.1</a> | KAP21.2                   |              |              |         |            |
| GI_31791017-S | 136.5  | 132.4  | 125.6  | KRTAP19-7 | <a href="#">NM_181614.1</a> | KAP19.7                   |              |              |         |            |
| GI_31791019-S | 94.3   | 89.2   | 96.3   | KRTAP20-1 | <a href="#">NM_181615.1</a> | KAP20.1                   |              |              |         |            |
| GI_31791021-S | 102.8  | 99.4   | 96.5   | KRTAP19-5 | <a href="#">NM_181611.1</a> | KAP19.5                   |              |              |         |            |
| GI_31791023-S | 138.6  | 146.9  | 132    | KRTAP19-6 | <a href="#">NM_181612.1</a> | KAP19.6                   |              |              |         |            |
| GI_31791025-S | 120.4  | 113.6  | 132.7  | KRTAP19-3 | <a href="#">NM_181609.1</a> | KAP19.3                   |              |              |         |            |
| GI_31791027-S | 83     | 92.9   | 75.1   | KRTAP19-4 | <a href="#">NM_181610.1</a> | KAP19.4                   |              |              |         |            |
| GI_31791029-S | 122    | 117.5  | 120.6  | KRTAP19-1 | <a href="#">NM_181607.1</a> | KAP19.1                   |              |              |         | intermedia |
| GI_31791031-S | 96.6   | 101.6  | 90.3   | KRTAP19-2 | <a href="#">NM_181608.1</a> | KAP19.2                   |              |              |         |            |
| GI_31791033-S | 122.7  | 138.8  | 140.4  | KRTAP6-3  | <a href="#">NM_181605.1</a> | KAP6.3                    |              |              |         |            |
| GI_31791035-S | 224.9  | 251.8  | 226.6  | KRTAP7-1  | <a href="#">NM_181606.1</a> | KAP7.1                    |              |              |         | intermedia |
| GI_31791037-S | 127.7  | 136.9  | 122.2  | KRTAP6-1  | <a href="#">NM_181602.1</a> | KAP6.1;C21orf103          |              |              |         |            |
| GI_31791039-S | 116.6  | 95.5   | 99.4   | KRTAP6-2  | <a href="#">NM_181604.1</a> | KAP6.2                    |              |              |         |            |
| GI_31791046-S | 267.7  | 318.3  | 268.9  | LOC285398 | <a href="#">NM_181647.1</a> |                           |              |              |         |            |
| GI_31791048-S | 167.1  | 185.3  | 162.4  | LOC286161 | <a href="#">NM_181648.1</a> |                           |              |              |         |            |
| GI_31791050-S | 92.9   | 104    | 98.9   | FLJ25393  | <a href="#">NM_181645.1</a> |                           |              |              |         |            |
| GI_31791054-S | 129.9  | 153.8  | 126.5  | LOC128344 | <a href="#">NM_181643.1</a> |                           |              |              |         |            |
| GI_31795534-S | 187.5  | 222.3  | 210.3  | RAB36     | <a href="#">NM_004914.2</a> |                           | RAB small    | Golgi        |         | nonselecti |
| GI_31795536-I | 493.8  | 537.6  | 585.9  | RFC3      | <a href="#">NM_002915.2</a> | RFC38;MGC5276             | DNA-         | DNA          |         | DNA        |
| GI_31795537-A | 329    | 311.2  | 326.9  | RFC3      | <a href="#">NM_181558.1</a> | RFC38;MGC5276             | DNA-         | DNA          |         | DNA        |
| GI_31795537-I | 334.6  | 365.1  | 336.2  | RFC3      | <a href="#">NM_181558.1</a> | RFC38;MGC5276             | DNA-         | DNA          |         | DNA        |
| GI_31795539-I | 235.7  | 291    | 271.9  | RFC5      | <a href="#">NM_181578.1</a> | RFC36;MGC1155             | nucleotide   | delta-DNA    |         | DNA        |
| GI_31795541-A | 771.9  | 717.8  | 806.5  | RFC5      | <a href="#">NM_007370.3</a> | RFC36;MGC1155             | nucleotide   | delta-DNA    |         | DNA        |
| GI_31795542-S | 1504.6 | 1791.1 | 1809.8 | GMFB      | <a href="#">NM_004124.2</a> | GMF                       | enzyme       | intracellula |         | protein    |
| GI_31795543-S | 179.9  | 199.9  | 232.1  | ORC1L     | <a href="#">NM_004153.2</a> | ORC1;PARC1;HSORC1         | DNA          | nucleus      |         | DNA        |
| GI_31795545-S | 201.6  | 229.5  | 231.6  | SLC13A4   | <a href="#">NM_012450.2</a> | SUT1;SUT-1                | sodium:su    | integral to  |         | sulfate    |
| GI_31795554-A | 1537.4 | 1592.6 | 1240.9 | LOC284018 | <a href="#">NM_181655.1</a> |                           |              |              |         |            |
| GI_31795556-I | 112.1  | 106.4  | 113.9  | LOC284018 | <a href="#">NM_181656.1</a> |                           |              |              |         |            |
| GI_31795560-S | 227.8  | 259.9  | 255.7  | CPLX4     | <a href="#">NM_181654.1</a> | CPXIV                     |              |              |         |            |
| GI_31795562-S | 80.1   | 83.7   | 78.8   | TPH2      | <a href="#">NM_173353.2</a> | NTPH;FLJ37295             | monoxyg      |              |         | metabolis  |
| GI_31795590-S | 128.6  | 148.2  | 126.8  | RGSL1     | <a href="#">NM_181572.2</a> |                           | signal       |              |         |            |
| GI_31880337-S | 7278.8 | 8233.1 | 6761.6 | TUBA6     | <a href="#">NM_032704.2</a> | MGC10851;MGC14580         |              |              |         |            |
| GI_31880782-S | 1803.4 | 1107.6 | 1108.2 | PELO      | <a href="#">NM_015946.4</a> | CGI-17;PRO1770            |              |              | nucleus | protein    |
| GI_31880793-S | 160    | 186.4  | 154.3  | PON1      | <a href="#">NM_000446.3</a> | ESA;PON                   | arylesterase | extracellul  |         | response   |
| GI_31881619-A | 2532   | 2597.6 | 2102   | PPA2      | <a href="#">NM_176867.2</a> | HSPC124;MGC49850;SID6-306 |              |              |         |            |
| GI_31881629-S | 98.1   | 113.5  | 98.3   | PTGER2    | <a href="#">NM_000956.2</a> | EP2                       | prostaglan   | integral to  |         | G-protein  |
| GI_31881646-S | 164.8  | 175.6  | 146.4  | SPTLC2    | <a href="#">NM_004863.2</a> | LCB2;SPT2;KIAA0526        | serine C-    | endoplas     |         | amino      |
| GI_31881686-A | 1561.9 | 1278.9 | 1303.2 | RFC4      | <a href="#">NM_181573.1</a> | A1;RFC37;MGC27291         | DNA          | DNA          |         | DNA        |
| GI_31881692-A | 107.1  | 140    | 116.5  | BTN2A2    | <a href="#">NM_181531.1</a> | BTF2;BT2.2                |              |              |         |            |
| GI_31881700-I | 134.7  | 142.9  | 143.6  | BTN2A2    | <a href="#">NM_006995.3</a> | BTF2;BT2.2                |              |              |         |            |

|               |        |        |        |           |                             |                                       |             |              |              |
|---------------|--------|--------|--------|-----------|-----------------------------|---------------------------------------|-------------|--------------|--------------|
| GI_31881722-S | 179.1  | 305.9  | 469.7  | C14orf137 | <a href="#">NM_023112.2</a> | OTB2;OTU2;MGC3102;FLJ21916            |             |              |              |
| GI_31881739-S | 1509.3 | 1493.3 | 1505.4 | SLC12A9   | <a href="#">NM_020246.2</a> | CIP1                                  | cation:chlo | integral to  |              |
| GI_31881756-S | 3814.5 | 2801.2 | 1820   | DDAH1     | <a href="#">NM_012137.2</a> | DDAH                                  | catalytic   |              | nitric oxide |
| GI_31881762-S | 132    | 176.3  | 171.7  | DLL4      | <a href="#">NM_019074.2</a> | hdelta2                               | Notch       | integral to  | circulation  |
| GI_31881769-S | 317.8  | 428.4  | 369.9  | ADAM30    | <a href="#">NM_021794.2</a> | svph4                                 | metallope   | integral to  | proteolysis  |
| GI_31881778-A | 1124   | 1380.3 | 1642.2 | GMPPA     | <a href="#">NM_013335.2</a> |                                       | nucleotidyl |              | biosynthes   |
| GI_31881784-S | 1754.3 | 1977.8 | 2122.8 | HPS6      | <a href="#">NM_024747.4</a> | FLJ22501;MGC20522                     |             |              |              |
| GI_31881791-S | 261.6  | 293.2  | 270.9  | LTB4R     | <a href="#">NM_181657.1</a> | BLTR;P2Y7;GPR16;LTBR1;P2RY7;CMKRL1;   | leukotrien  | integral to  | G-protein    |
| GI_31881797-S | 916.8  | 1192.9 | 1054.4 | MKLN1     | <a href="#">NM_013255.2</a> | FLJ11162                              |             | cytoplasm    | cell-matrix  |
| GI_31881814-S | 89.4   | 105.2  | 85.6   | TITF1     | <a href="#">NM_003317.3</a> | BCH;BHC;TEBP;TTF1;NKX2A;TTF-          | transcripti | nucleus      | regulation   |
| GI_31981491-S | 86.7   | 92.8   | 90.7   | PGR       | <a href="#">NM_000926.2</a> | PR;NR3C3                              | steroid     |              | signal       |
| GI_31982866-S | 317.7  | 289.1  | 277.5  | PINX1     | <a href="#">NM_017884.3</a> | LPTL;LPTS;MGC8850;FLJ20565            | nucleic     | telomere     | negative     |
| GI_31982870-S | 374.4  | 261.2  | 318.5  | LOC128439 | <a href="#">NM_139016.2</a> |                                       | DNA         | nucleus      | regulation   |
| GI_31982874-S | 2715   | 2828.5 | 1920.4 | LOC134147 | <a href="#">NM_138809.2</a> |                                       | hydrolase   |              |              |
| GI_31982875-S | 91.7   | 110.8  | 94     | LOC151871 | <a href="#">NM_138815.2</a> |                                       | DNA         | nucleus      |              |
| GI_31982877-S | 98.4   | 99.1   | 98     | KIR2DL4   | <a href="#">NM_002255.3</a> | 103AS;15.212;CD158D;KIR103;KIR103AS   | transmem    | integral to  | cellular     |
| GI_31982879-S | 391.6  | 554.3  | 518    | HMGB1     | <a href="#">NM_002128.3</a> | HMG1;HMG3;SBP-1                       | single-     | nuclear      | chromoso     |
| GI_31982880-S | 141.9  | 164.6  | 159.9  | FLJ21069  | <a href="#">NM_024692.3</a> |                                       |             |              |              |
| GI_31982882-S | 163    | 212.9  | 166.8  | NKD1      | <a href="#">NM_033119.3</a> |                                       | lactoylglut |              | carbohydr    |
| GI_31982883-S | 252.7  | 261.3  | 235.5  | FLJ20813  | <a href="#">NM_017961.3</a> |                                       |             |              |              |
| GI_31982886-S | 107.4  | 125.3  | 108.8  | GATA2     | <a href="#">NM_032638.3</a> | NFE1B;MGC2306                         | transcripti | nucleus      | cell growth  |
| GI_31982890-S | 4409.7 | 4678.2 | 4420.3 | SMAP      | <a href="#">NM_014267.3</a> | IMAGE145052                           | molecular   | cellular_co  | biological_  |
| GI_31982893-S | 146.8  | 228.1  | 153.6  | LOC92691  | <a href="#">NM_138390.2</a> |                                       |             |              |              |
| GI_31982894-S | 4714.3 | 3529.4 | 3309.2 | THAP4     | <a href="#">NM_015963.3</a> | CGI-36                                | DNA         |              |              |
| GI_31982900-S | 9632.9 | 8806.7 | 7250.9 | SCD       | <a href="#">NM_005063.3</a> |                                       | stearoyl-   | endoplas     | fatty acid   |
| GI_31982903-S | 616    | 542.6  | 586.7  | LOC129401 | <a href="#">NM_138285.2</a> | MP44;NP44;NUP35                       | porin       | mitochond    |              |
| GI_31982905-S | 194.4  | 394.5  | 199.6  | FLJ14957  | <a href="#">NM_032866.2</a> | KIAA1749                              |             |              |              |
| GI_31982907-S | 771.5  | 401.9  | 230.4  | JDP2      | <a href="#">NM_130469.2</a> | JUNDM2                                | DNA         | nucleus      | regulation   |
| GI_31982908-S | 374.1  | 410.1  | 357.7  | ZNF394    | <a href="#">NM_032164.2</a> | FLJ12298                              | nucleic     | nucleus      | regulation   |
| GI_31982910-S | 291.2  | 287.6  | 271.9  | GL009     | <a href="#">NM_032492.2</a> |                                       |             |              |              |
| GI_31982912-S | 1200.8 | 1289.5 | 1095.3 | FKSG44    | <a href="#">NM_031904.2</a> |                                       |             | cytoskelet   |              |
| GI_31982913-S | 4140.8 | 4632.1 | 4039.2 | FLJ12953  | <a href="#">NM_032118.2</a> |                                       |             |              |              |
| GI_31982914-S | 106.4  | 127.6  | 99.6   | CCDC3     | <a href="#">NM_031455.2</a> | DKFZP761F241                          |             |              |              |
| GI_31982916-S | 272.2  | 279.4  | 235.8  | FLJ23042  | <a href="#">NM_025157.2</a> |                                       |             |              |              |
| GI_31982918-S | 375.4  | 432.3  | 419    | ZNF430    | <a href="#">NM_025189.2</a> | FLJ13659                              | nucleic     | intracellula | regulation   |
| GI_31982920-S | 95.1   | 95.4   | 90     | FLJ12505  | <a href="#">NM_024749.2</a> |                                       |             |              |              |
| GI_31982926-S | 451.6  | 548.6  | 478.5  | AACS      | <a href="#">NM_023928.2</a> | SUR-5;FLJ12389                        |             |              |              |
| GI_31982928-S | 446.1  | 425    | 457.4  | VRK3      | <a href="#">NM_016440.2</a> |                                       | protein     | nucleus      | protein      |
| GI_31982934-S | 442.1  | 688.6  | 719.9  | EPM2AIP1  | <a href="#">NM_014805.2</a> | FLJ11207;KIAA0766                     |             |              |              |
| GI_31982935-S | 713    | 768.1  | 391.6  | SGPL1     | <a href="#">NM_003901.2</a> | SPL;KIAA1252                          | lyase       | endoplas     | amino        |
| GI_31982940-S | 149.2  | 189.8  | 171.6  | KIAA0853  | <a href="#">NM_015070.2</a> | DKFZp434D1812                         |             |              |              |
| GI_31982942-S | 104.4  | 114.9  | 107.5  | FOXP3     | <a href="#">NM_014009.2</a> | JM2;AIID;IPEX;PIDX;XPID;DIETER;SCURFI | transcripti | nucleus      | regulation   |
| GI_31982944-S | 120.1  | 117    | 106    | SLC5A10   | <a href="#">NM_152351.2</a> | SGLT5;FLJ25217                        | transporte  | membran      | transport    |
| GI_31982952-I | 576.9  | 756.3  | 482.1  | MDS010    | <a href="#">NM_152305.1</a> | MDSRP;MGC32995                        |             |              |              |

|               |        |        |        |            |                             |                            |             |             |              |
|---------------|--------|--------|--------|------------|-----------------------------|----------------------------|-------------|-------------|--------------|
| GI_32129198-S | 4326.7 | 4768   | 4534.6 | CIP29      | <a href="#">NM_033082.1</a> | HCC-1;HSPC316;MGC14726     | DNA         | nucleus     | transcripti  |
| GI_32129208-S | 683.8  | 596.8  | 423.5  | RAP2C      | <a href="#">NM_021183.3</a> |                            | RAS small   |             | small        |
| GI_32129210-S | 116.7  | 120    | 115.3  | ZNF445     | <a href="#">NM_181489.3</a> | ZNF168                     | nucleic     | nucleus     | regulation   |
| GI_32129211-S | 757    | 713.6  | 634.9  | ZNF434     | <a href="#">NM_017810.2</a> | MGC4179;FLJ20417;FLJ31901  |             |             |              |
| GI_32129213-S | 261.3  | 319.2  | 267.3  | EFCBP2     | <a href="#">NM_019065.2</a> | NECAB2                     |             |             |              |
| GI_32130513-A | 1475.2 | 1378.3 | 1949.2 | NDRG3      | <a href="#">NM_022477.2</a> | FLJ13556                   | catalytic   | cytoplasm   | spermatog    |
| GI_32130515-S | 228.6  | 279.2  | 306    | SDCCAG1    | <a href="#">NM_004713.2</a> | NY-CO-1;FLJ10051           | DNA         | nucleus     | regulation   |
| GI_32130517-S | 109.6  | 127.6  | 116.1  | APOC2      | <a href="#">NM_000483.3</a> |                            | lipoprotein | extracellul | lipid        |
| GI_32130524-I | 131.2  | 149.1  | 139.4  | CKLFSF3    | <a href="#">NM_144601.2</a> | FLJ31762;MGC51956          | transporte  | membran     | transport    |
| GI_32130525-I | 221.4  | 229.5  | 210.4  | CKLFSF3    | <a href="#">NM_181553.1</a> | FLJ31762;MGC51956          | transporte  | membran     | transport    |
| GI_32130529-A | 2873.2 | 3617.4 | 4689.5 | CKLFSF3    | <a href="#">NM_181555.1</a> | FLJ31762;MGC51956          | transporte  | membran     | transport    |
| GI_32130531-A | 120.1  | 133.8  | 122.3  | CKLFSF5    | <a href="#">NM_138460.2</a> | FLJ37521                   | transporte  | membran     | transport    |
| GI_32130532-I | 355.2  | 439.8  | 376.8  | CKLFSF5    | <a href="#">NM_181618.1</a> | FLJ37521                   | transporte  | membran     | transport    |
| GI_32130534-S | 1813   | 2922.3 | 2588.6 | CKLFSF6    | <a href="#">NM_017801.2</a> | PRO2219;FLJ20396           | transporte  | membran     | transport    |
| GI_32130535-S | 1284   | 1092.3 | 684.9  | CKLFSF8    | <a href="#">NM_178868.3</a> |                            | cytokine    | membran     | chemotaxi    |
| GI_32130537-S | 128.2  | 121.8  | 122.7  | CD7        | <a href="#">NM_006137.5</a> | GP40;TP41;Tp40;LEU-9       | lymphocyt   | integral to | calcium      |
| GI_32130538-S | 194.5  | 225.1  | 200    | MAP3K13    | <a href="#">NM_004721.3</a> | LZK                        | protein-    | membran     | signal       |
| GI_32130539-S | 340.4  | 324.3  | 339.4  | PFTK1      | <a href="#">NM_012395.2</a> | KIAA0834;PFTFAIRE1         | cAMP-       | cytoplasm   | protein      |
| GI_32140179-S | 153.6  | 166.8  | 153.7  | KRTAP12-1  | <a href="#">NM_181686.1</a> | KAP12.1;KRTAP12.1          |             | intermedia  |              |
| GI_32140181-S | 207.5  | 251.9  | 223.1  | KRTAP10-10 | <a href="#">NM_181688.1</a> | KAP10.10;KRTAP18.10        |             |             |              |
| GI_32140183-S | 187.3  | 216.6  | 184.9  | KRTAP12-2  | <a href="#">NM_181684.1</a> | KAP12.2;KRTAP12.2          |             | intermedia  |              |
| GI_32140191-S | 110    | 164.6  | 138.6  | ZFH4       | <a href="#">NM_024721.2</a> | ZHF4;FLJ20980              | hormone     | extracellul | regulation   |
| GI_32140759-S | 153.4  | 155.5  | 138.5  | COL27A1    | <a href="#">NM_032888.2</a> | FLJ11895;KIAA1870;MGC11337 |             |             |              |
| GI_32171174-S | 6978.4 | 6287   | 4847.6 | G10        | <a href="#">NM_003910.2</a> | EDG2;EDG-2                 | transcripti | nucleus     | regulation   |
| GI_32171176-S | 4454.2 | 5722.5 | 5762.2 | C6orf49    | <a href="#">NM_013397.3</a> | OBTP;DKFZp761H221          |             |             |              |
| GI_32171179-S | 151.7  | 161.6  | 149.9  | C6orf162   | <a href="#">NM_020425.3</a> | dJ102H19.2;DKFZP586E1923   |             |             |              |
| GI_32171181-S | 1105.4 | 2144.7 | 460.2  | ID3        | <a href="#">NM_002167.2</a> | HEIR-1                     | transcripti | nucleus     | developm     |
| GI_32171183-A | 613.7  | 647.9  | 632.3  | C10orf9    | <a href="#">NM_181698.1</a> | CFP1;CBCP1                 |             |             | cell cycle   |
| GI_32171183-I | 137.7  | 150.7  | 148.4  | C10orf9    | <a href="#">NM_181698.1</a> | CFP1;CBCP1                 |             |             | cell cycle   |
| GI_32171185-S | 3510.6 | 3928   | 4035.8 | BCAP31     | <a href="#">NM_005745.5</a> | CDM;BAP31;6C6-AG;DXS1357E  | protein     | endoplas    | intracellula |
| GI_32171193-S | 153.6  | 172.2  | 169.7  | SPATA12    | <a href="#">NM_181727.1</a> | SRG5                       |             |             |              |
| GI_32171195-S | 949.4  | 1132.2 | 864.2  | p30        | <a href="#">NM_181716.1</a> |                            |             |             |              |
| GI_32171198-S | 177.1  | 219.9  | 205    | LOC338773  | <a href="#">NM_181724.1</a> |                            |             |             |              |
| GI_32171200-S | 491.2  | 649.1  | 498    | Lrp2bp     | <a href="#">NM_181726.1</a> |                            | receptor    |             |              |
| GI_32171202-S | 306.1  | 350.3  | 307.1  | LOC285908  | <a href="#">NM_181722.1</a> |                            |             |             |              |
| GI_32171204-S | 118.7  | 114.6  | 99.8   | LOC286097  | <a href="#">NM_181723.1</a> |                            | calcium     | nucleus     | regulation   |
| GI_32171208-S | 381.1  | 685.1  | 435.4  | LOC257106  | <a href="#">NM_181720.1</a> |                            |             |             |              |
| GI_32171210-S | 140.7  | 137.2  | 123.2  | LOC253018  | <a href="#">NM_181717.1</a> |                            |             |             |              |
| GI_32171214-S | 1048.6 | 926.8  | 1042.8 | TORC2      | <a href="#">NM_181715.1</a> |                            |             |             |              |
| GI_32171218-S | 129.9  | 149    | 148.6  | C6orf152   | <a href="#">NM_181714.1</a> |                            |             |             |              |
| GI_32171220-S | 122.9  | 186.5  | 118.8  | GRASP      | <a href="#">NM_181711.1</a> |                            | protein     |             |              |
| GI_32171224-S | 416.6  | 463.6  | 533.5  | COQ3       | <a href="#">NM_017421.2</a> | bA9819.1                   | O-          | mitochond   | ubiquinon    |
| GI_32171232-S | 482.7  | 487.9  | 385.6  | LOC144233  | <a href="#">NM_181708.1</a> |                            |             |             |              |
| GI_32171235-S | 187.4  | 204.2  | 197.7  | LOC90624   | <a href="#">NM_181705.1</a> |                            |             |             |              |



|               |         |        |        |            |                             |                              |              |              |             |
|---------------|---------|--------|--------|------------|-----------------------------|------------------------------|--------------|--------------|-------------|
| GI_32171239-S | 2440.1  | 2977.1 | 3318.8 | NDUFA2     | <a href="#">NM_002488.2</a> | B8                           | NADH         | NADH         | energy      |
| GI_32171240-S | 170.1   | 252.9  | 190.5  | PDE4B      | <a href="#">NM_002600.2</a> | DPDE4;PDEIVB                 | cAMP-        | insoluble    | signal      |
| GI_32171243-S | 449.7   | 599.2  | 374.1  | DKFZP434G1 | <a href="#">NM_022742.2</a> | KIAA1793                     |              |              |             |
| GI_32171246-I | 1023.8  | 867.7  | 625.5  | C10orf9    | <a href="#">NM_145012.3</a> | CFP1;CBCP1                   |              |              | cell cycle  |
| GI_32171251-S | 936.9   | 1019.5 | 897.5  | QSCN6L1    | <a href="#">NM_181701.1</a> | SOXN;DKFZp762A2013           |              |              |             |
| GI_32171253-S | 253.9   | 256.4  | 225.4  | FLJ10922   | <a href="#">NM_018273.2</a> |                              |              |              |             |
| GI_32189315-A | 494.2   | 742.3  | 760    | KBTBD4     | <a href="#">NM_018095.3</a> | BKLHD4;HSPC252;FLJ10450      | protein      |              |             |
| GI_32189353-S | 167.4   | 198    | 167.6  | OPTC       | <a href="#">NM_014359.2</a> | OPT                          | extracellul  | extracellul  |             |
| GI_32189356-S | 150.4   | 345.7  | 217.6  | MRAS       | <a href="#">NM_012219.2</a> | M-RAs;RRAS3;R-RAS3           | RAS small    | plasma       | actin       |
| GI_32189358-S | 109.1   | 95.5   | 91.7   | NR1I3      | <a href="#">NM_005122.2</a> | CAR;CAR1;MB67;CAR-BETA       | androgen     | nucleus      | signal      |
| GI_32189359-S | 178.4   | 243.4  | 197.3  | GRAF       | <a href="#">NM_015071.2</a> | KIAA0621                     | Rho          | cellular_co  | cell growth |
| GI_32189360-S | 96.1    | 103.3  | 88.6   | SLC4A10    | <a href="#">NM_022058.2</a> |                              | inorganic    | intracellula | chloride    |
| GI_32189367-S | 92      | 102.3  | 94.5   | IGJ        | <a href="#">NM_144646.2</a> | JCH;IGCJ                     | antigen      | extracellul  | immune      |
| GI_32189368-S | 443.9   | 388.1  | 502.2  | POLE2      | <a href="#">NM_002692.2</a> | DPE2                         | epsilon      | nucleus      | DNA         |
| GI_32189370-S | 1280.4  | 1751.7 | 1489.8 | TPARL      | <a href="#">NM_018475.2</a> | TMPT27                       | molecular    | membran      |             |
| GI_32189374-S | 652.7   | 961    | 712    | SGCB       | <a href="#">NM_000232.2</a> | A3b;SGC;LGMD2E               |              | sarcoglyca   | muscle      |
| GI_32189375-S | 119.3   | 140.7  | 111.8  | TRIP4      | <a href="#">NM_016213.2</a> | HsT17391                     | transcripti  | cytoplasm    | transcripti |
| GI_32189381-S | 1379.9  | 1243.6 | 758.2  | HT007      | <a href="#">NM_018480.2</a> |                              |              |              |             |
| GI_32189383-S | 4497.7  | 6200.1 | 5303.3 | RPN1       | <a href="#">NM_002950.2</a> | RBPH1                        | oligosacch   | endoplas     | protein     |
| GI_32189384-I | 108.5   | 106.6  | 96.8   | KBTBD4     | <a href="#">NM_016506.3</a> | BKLHD4;HSPC252;FLJ10450      | protein      |              |             |
| GI_32189389-S | 859.2   | 1313.4 | 1381.2 | TDG        | <a href="#">NM_003211.2</a> |                              | pyrimidine-  | nucleoplas   | base-       |
| GI_32189393-S | 21153.4 | 23516  | 17421  | ATP5B      | <a href="#">NM_001686.2</a> | ATPMB;ATPSB                  | hydrogen-    | proton-      | energy      |
| GI_32189397-S | 128.5   | 133.6  | 135.5  | GIF        | <a href="#">NM_005142.2</a> |                              | binding      | extracellul  | transport   |
| GI_32189413-S | 264.9   | 300.9  | 282.1  | SF3A2      | <a href="#">NM_007165.3</a> | PRP11;SAP62;SF3a66           | small        | spliceoso    | mRNA        |
| GI_32189414-S | 172.6   | 140.7  | 103.1  | C20orf19   | <a href="#">NM_018474.2</a> | HT013;DKFZP586H021           |              |              |             |
| GI_32189424-S | 84.6    | 88.2   | 93.4   | FLJ25955   | <a href="#">NM_178821.1</a> |                              |              |              |             |
| GI_32261290-S | 163.4   | 190.6  | 172.3  | FLJ20442   | <a href="#">NM_017823.2</a> |                              | protein      |              | protein     |
| GI_32261292-S | 4444.2  | 4097.5 | 3237   | P14        | <a href="#">NM_016047.2</a> | SAP14;SF3B14;CGI-            | RNA          | nucleus      | mRNA        |
| GI_32261293-S | 1210.1  | 1213.2 | 1142.4 | PRKRA      | <a href="#">NM_003690.3</a> | RAX;PACT                     | enzyme       | intracellula | negative    |
| GI_32261294-S | 135.1   | 118.8  | 107.9  | PRG2       | <a href="#">NM_002728.3</a> | MBP;BMPG                     | lectin [goid | cytoplasm    | inflammat   |
| GI_32261296-S | 189.3   | 223.7  | 166.7  | MGC14801   | <a href="#">NM_032705.2</a> |                              |              |              |             |
| GI_32261298-S | 84.4    | 93.8   | 95.3   | MGC10955   | <a href="#">NM_032676.2</a> |                              |              |              |             |
| GI_32261299-S | 656.3   | 881.5  | 1036.4 | MGC13010   | <a href="#">NM_032687.2</a> |                              |              |              |             |
| GI_32261302-S | 87.4    | 103.6  | 89.8   | BAZ2A      | <a href="#">NM_013449.2</a> | TIP5;KIAA0314                | DNA          | kinesin      | chromatin   |
| GI_32261305-S | 5489.2  | 5233.7 | 5074.1 | IQGAP1     | <a href="#">NM_003870.2</a> | SAR1;p195;KIAA0051;HUMORFA01 | GTPase       | actin        | cell shape  |
| GI_32261308-S | 134.8   | 149.4  | 141    | GPR135     | <a href="#">NM_022571.3</a> | PAFR;HUMNPIIY20              | platelet     | integral to  | G-protein   |
| GI_32261311-S | 471.4   | 504.9  | 582.9  | HSPC039    | <a href="#">NM_016097.2</a> | PRO2309                      |              |              |             |
| GI_32261312-S | 1288.2  | 1567   | 1519.9 | RBM3       | <a href="#">NM_006743.2</a> | IS1-RNPL                     | RNA          |              | RNA         |
| GI_32261315-S | 570.7   | 721.8  | 657.9  | FLJ14345   | <a href="#">NM_024733.2</a> |                              |              | nucleus      |             |
| GI_32261317-S | 78.4    | 91.1   | 69.5   | UNC5B      | <a href="#">NM_170744.2</a> | UNC5H2;p53RDL1               | receptor     |              | signal      |
| GI_32261319-I | 171.8   | 203.3  | 195.1  | HUMGT198A  | <a href="#">NM_013290.3</a> | TBPIP                        |              |              |             |
| GI_32261325-S | 1484.2  | 1488.2 | 1744   | PDPR       | <a href="#">NM_017990.3</a> | FLJ10079                     |              |              |             |
| GI_32261328-S | 906.1   | 1282.7 | 1664.7 | TMEM14A    | <a href="#">NM_014051.2</a> | PTD011;C6orf73               | molecular    | integral to  |             |
| GI_32261331-S | 283.1   | 326.5  | 266    | SEZ6L      | <a href="#">NM_021115.2</a> | KIAA0927                     |              | integral to  |             |

|               |        |        |        |            |                             |                                      |             |             |             |
|---------------|--------|--------|--------|------------|-----------------------------|--------------------------------------|-------------|-------------|-------------|
| GI_32306512-S | 103.4  | 114.5  | 102.4  | PDE4D      | <a href="#">NM_006203.2</a> | DPDE3;STRK1                          | cAMP-       | insoluble   |             |
| GI_32306514-S | 145.2  | 166.2  | 164.3  | HSPB2      | <a href="#">NM_001541.2</a> | MKBP;HSP27;Hs.78846                  | enzyme      | cytosol     | heat        |
| GI_32306515-S | 94.6   | 90     | 87.2   | PRO2268    | <a href="#">NM_018520.2</a> |                                      |             |             |             |
| GI_32306516-S | 95.1   | 108.4  | 101.9  | MGC10561   | <a href="#">NM_032647.2</a> |                                      | chromatin   | chromatin   | chromatin   |
| GI_32306517-S | 118.1  | 121.7  | 108.2  | ZNF540     | <a href="#">NM_152606.2</a> | DKFZp547B0714                        | nucleic     | nucleus     | regulation  |
| GI_32306518-S | 699.3  | 790.7  | 704    | MGC10871   | <a href="#">NM_031492.2</a> |                                      | nucleic     |             |             |
| GI_32306519-S | 148.7  | 155.7  | 155    | FLT1       | <a href="#">NM_002019.2</a> | FLT;VEGFR1                           | vascular    | extracellul | transmem    |
| GI_32306535-S | 794    | 914.6  | 791.5  | MTIF3      | <a href="#">NM_152912.3</a> |                                      | translation |             | translation |
| GI_32306537-S | 126.4  | 133.5  | 133.6  | GPM6B      | <a href="#">NM_005278.2</a> | M6B                                  | molecular   | integral to | neurogene   |
| GI_32306538-S | 1245.8 | 1008.9 | 1158.7 | MGC874     | <a href="#">NM_016500.3</a> |                                      |             |             |             |
| GI_32306540-S | 868    | 756.9  | 606.3  | TRIT1      | <a href="#">NM_017646.3</a> | IPT;MOD5;FLJ20061                    | ATP         | cellular_co | tRNA        |
| GI_32306541-S | 278.6  | 310.7  | 414.8  | DKFZP564J0 | <a href="#">NM_015459.2</a> |                                      |             |             |             |
| GI_32306543-S | 651.2  | 834.8  | 714.3  | MGC13005   | <a href="#">NM_032685.2</a> |                                      |             |             |             |
| GI_32307106-A | 1039.9 | 960.6  | 945.6  | WFDC3      | <a href="#">NM_181530.1</a> | WAP14;dJ447F3.3                      | peptidase   |             |             |
| GI_32307108-I | 122.5  | 138.7  | 122.6  | WFDC3      | <a href="#">NM_080614.1</a> | WAP14;dJ447F3.3                      | peptidase   |             |             |
| GI_32307111-S | 1762.8 | 1534.5 | 1355.6 | PPP2R2A    | <a href="#">NM_002717.2</a> | MGC52248                             | protein     | protein     | signal      |
| GI_32307112-I | 113.5  | 132.1  | 113.5  | PPP2R2B    | <a href="#">NM_181674.1</a> | SCA12;MGC24888;PR55-BETA;PP2A-       | protein     | protein     | signal      |
| GI_32307114-I | 345.1  | 396.7  | 366.8  | PPP2R2B    | <a href="#">NM_181675.1</a> | SCA12;MGC24888;PR55-BETA;PP2A-       | protein     | protein     | signal      |
| GI_32307116-A | 144    | 173.1  | 136.4  | PPP2R2B    | <a href="#">NM_181676.1</a> | SCA12;MGC24888;PR55-BETA;PP2A-       | protein     | protein     | signal      |
| GI_32307118-I | 1236.9 | 1588.3 | 1329.2 | PPP2R2B    | <a href="#">NM_181677.1</a> | SCA12;MGC24888;PR55-BETA;PP2A-       | protein     | protein     | signal      |
| GI_32307120-I | 78     | 102.5  | 90.3   | PPP2R2B    | <a href="#">NM_181678.1</a> | SCA12;MGC24888;PR55-BETA;PP2A-       | protein     | protein     | signal      |
| GI_32307122-I | 93.5   | 94.2   | 87.5   | PPP2R2B    | <a href="#">NM_004576.2</a> | SCA12;MGC24888;PR55-BETA;PP2A-       | protein     | protein     | signal      |
| GI_32307123-A | 654.6  | 816.7  | 622.2  | NCOA3      | <a href="#">NM_006534.2</a> | ACTR;AIB1;RAC3;SRC3;pCIP;CTG26;CAGH  | transcripti | nucleus     | oncogene    |
| GI_32307127-S | 858.4  | 940    | 848.3  | NCOA6      | <a href="#">NM_014071.2</a> | NRC;AIB3;ASC2;PRIP;TRBP;RAP250;KIAA0 | chromatin   | transcripti | transcripti |
| GI_32307129-A | 245.4  | 250.1  | 246.1  | NFS1       | <a href="#">NM_181679.1</a> | NIFS;HUSSY-08                        | transamin   | cytosol     | sulfur      |
| GI_32307129-I | 250.8  | 286.6  | 262.1  | NFS1       | <a href="#">NM_181679.1</a> | NIFS;HUSSY-08                        | transamin   | cytosol     | sulfur      |
| GI_32307131-I | 140.7  | 130.3  | 165.2  | NFS1       | <a href="#">NM_021100.3</a> | NIFS;HUSSY-08                        | transamin   | cytosol     | sulfur      |
| GI_32307133-S | 135.1  | 161.6  | 131.6  | NKX2-2     | <a href="#">NM_002509.2</a> | NKX2B;NKX2.2                         | transcripti | nucleus     | brain       |
| GI_32307134-I | 99.8   | 98.2   | 101.8  | NNAT       | <a href="#">NM_005386.2</a> | Peg5;MGC1439                         | auxiliary   |             | protein-    |
| GI_32307135-A | 439.5  | 543.5  | 503.6  | NNAT       | <a href="#">NM_181689.1</a> | Peg5;MGC1439                         | auxiliary   |             | protein-    |
| GI_32307138-S | 202.2  | 253.8  | 218.1  | PEX26      | <a href="#">NM_017929.2</a> | FLJ20695                             |             |             |             |
| GI_32307139-A | 129.8  | 122.8  | 179.8  | PITPNC1    | <a href="#">NM_012417.2</a> | RDGBB;RDGBB1;RDGB-BETA               | phosphati   | cytoplasm   | signal      |
| GI_32307141-I | 470.7  | 438.3  | 791.3  | PITPNC1    | <a href="#">NM_181671.1</a> | RDGBB;RDGBB1;RDGB-BETA               | phosphati   | cytoplasm   | signal      |
| GI_32307143-S | 7228.9 | 9140.8 | 5925.4 | PLOD       | <a href="#">NM_000302.2</a> | LH;LLH;PLOD1                         | electron    | membran     | epidermal   |
| GI_32307145-I | 103.2  | 103.9  | 94.4   | OGT        | <a href="#">NM_003605.3</a> | HRNT1;FLJ23071;MGC22921;O-GLCNAC     | acetylgluc  | cytosol     | response    |
| GI_32307149-A | 1371.1 | 1354.3 | 1072.3 | OGT        | <a href="#">NM_181673.1</a> | HRNT1;FLJ23071;MGC22921;O-GLCNAC     | acetylgluc  | cytosol     | response    |
| GI_32307151-S | 167.1  | 234.8  | 287.7  | OXTR       | <a href="#">NM_000916.3</a> | OT-R                                 | oxytocin    | endosome    | lactation   |
| GI_32307157-S | 437.3  | 457    | 417.7  | CENTG3     | <a href="#">NM_031946.3</a> | MRIP-1                               | small       | nucleus     | small       |
| GI_32307158-S | 230.9  | 278.7  | 248.3  | CRHR2      | <a href="#">NM_001883.2</a> | CRFR2                                | corticotrop | integral to | G-protein   |
| GI_32307160-S | 2292.8 | 2314   | 2212.9 | CUL1       | <a href="#">NM_003592.2</a> |                                      | tumor       |             | induction   |
| GI_32307162-A | 119.5  | 122    | 115    | AKT3       | <a href="#">NM_181690.1</a> | PKBG;PRKBG;STK-2;RAC-gamma;RAC-PK-   | protein     |             | protein     |
| GI_32307162-I | 88.3   | 96.2   | 88.3   | AKT3       | <a href="#">NM_181690.1</a> | PKBG;PRKBG;STK-2;RAC-gamma;RAC-PK-   | protein     |             | protein     |
| GI_32307164-I | 124.8  | 130.1  | 122.9  | AKT3       | <a href="#">NM_005465.3</a> | PKBG;PRKBG;STK-2;RAC-gamma;RAC-PK-   | protein     |             | protein     |
| GI_32307165-S | 89.1   | 77.7   | 84.9   | ARHGEF15   | <a href="#">NM_173728.2</a> | ARGEF15;FLJ13791;KIAA0915;MGC44868;V |             |             |             |

|               |         |        |        |           |                             |                                     |            |             |              |
|---------------|---------|--------|--------|-----------|-----------------------------|-------------------------------------|------------|-------------|--------------|
| GI_32307168-A | 149.2   | 167    | 145.2  | DGKH      | <a href="#">NM_152910.3</a> | DGKeta;DKFZp76111510                | diacylglyc | protein     |              |
| GI_32307169-I | 105.3   | 120.4  | 100.3  | DGKH      | <a href="#">NM_178009.2</a> | DGKeta;DKFZp76111510                | diacylglyc | protein     |              |
| GI_32307170-S | 349.7   | 432.2  | 388.7  | DLST      | <a href="#">NM_001933.3</a> | DLTS                                |            | energy      |              |
| GI_32307171-S | 139     | 188    | 155.3  | DPT       | <a href="#">NM_001937.3</a> | TRAMP                               | protein    | extracellul | cell         |
| GI_32307173-S | 857.2   | 858.5  | 786.3  | KDELR1    | <a href="#">NM_006801.2</a> | ERD2;HDEL;PM23;ERD2.1               | KDEL       | endoplas    | intracellula |
| GI_32307174-S | 433.1   | 481.3  | 402.2  | KIAA1737  | <a href="#">NM_033426.2</a> |                                     |            |             |              |
| GI_32307176-S | 102.4   | 114.5  | 101    | FOXG1B    | <a href="#">NM_005249.3</a> | BF1;QIN;FKH2;HFK1;FKHL1;FKHL4;HBF-1 | DNA        | nucleus     | brain        |
| GI_32307179-S | 10588.4 | 12189  | 11575  | CHCHD2    | <a href="#">NM_016139.2</a> | C7orf17                             |            |             |              |
| GI_32307180-S | 331.1   | 366.6  | 248.1  | MGC24039  | <a href="#">NM_144973.2</a> |                                     |            |             |              |
| GI_32307182-S | 200.8   | 217.1  | 354.4  | SEMA3C    | <a href="#">NM_006379.2</a> | SemE;SEMAE                          |            |             | drug         |
| GI_32307183-S | 97.2    | 126    | 91.2   | SP4       | <a href="#">NM_003112.2</a> | HF1B;SPR-1                          | RNA        | nucleus     | regulation   |
| GI_32308168-S | 118.8   | 129.4  | 121.7  | ZNF233    | <a href="#">NM_181756.1</a> |                                     |            |             |              |
| GI_32313568-S | 309.7   | 271.5  | 540.8  | AGA       | <a href="#">NM_000027.2</a> | AGU                                 | N4-(beta-  | lysosome    | protein      |
| GI_32313574-A | 919.2   | 733.2  | 714.6  | AUP1      | <a href="#">NM_181575.2</a> |                                     | molecular  |             |              |
| GI_32313582-I | 136.4   | 140    | 134.4  | AUP1      | <a href="#">NM_012103.2</a> |                                     | molecular  |             |              |
| GI_32313586-S | 128.2   | 141.6  | 136.1  | CYP39A1   | <a href="#">NM_016593.3</a> |                                     | oxysterol  | microsom    | bile acid    |
| GI_32313592-S | 233.3   | 306.7  | 268.3  | GW112     | <a href="#">NM_006418.3</a> | GC1                                 |            |             |              |
| GI_32313604-A | 184.2   | 231.1  | 188.3  | SPINT1    | <a href="#">NM_003710.2</a> | HAI;HAI1                            | serine     | membran     |              |
| GI_32313609-S | 105.5   | 174.2  | 138.7  | USP18     | <a href="#">NM_017414.2</a> | ISG43;UBP43                         | ubiquitin- | nucleus     | ubiquitin-   |
| GI_32401415-S | 207.9   | 210.8  | 195.1  | FLJ12760  | <a href="#">NM_181725.1</a> |                                     |            |             |              |
| GI_32401419-S | 115.6   | 106.5  | 107.4  | SYNPR     | <a href="#">NM_144642.3</a> | SPO;MGC26651                        | transporte | mitochond   | transport    |
| GI_32401423-S | 651.9   | 1176.5 | 1092.2 | MLP       | <a href="#">NM_023009.4</a> | F52;MRP;MLP1;MACMARCKS              | calmoduli  |             | neurogene    |
| GI_32401432-S | 199.7   | 203.3  | 183.8  | GPR142    | <a href="#">NM_181790.1</a> | PGR2                                | receptor   | integral to | G-protein    |
| GI_32401434-S | 166.9   | 195.4  | 167.6  | GPR141    | <a href="#">NM_181791.1</a> | PGR13                               | rhodopsin- | integral to | G-protein    |
| GI_32401436-S | 115.1   | 138.1  | 126.9  | LOC341567 | <a href="#">NM_181788.1</a> |                                     |            |             |              |
| GI_32401438-S | 118.2   | 127.8  | 120.4  | CRG-L2    | <a href="#">NM_181789.1</a> |                                     |            |             |              |
| GI_32401442-S | 455.4   | 465.6  | 515.8  | LOC286148 | <a href="#">NM_181787.1</a> |                                     |            |             |              |
| GI_32401444-S | 1014.2  | 879.5  | 819.5  | SPRED2    | <a href="#">NM_181784.1</a> | Spred-2;FLJ21897;FLJ31917           |            |             |              |
| GI_32401446-S | 392.6   | 451    | 361.8  | LOC283537 | <a href="#">NM_181785.1</a> |                                     |            |             |              |
| GI_32401450-S | 157.7   | 226.6  | 212.1  | FLJ90492  | <a href="#">NM_181783.1</a> |                                     |            |             |              |
| GI_32401452-S | 93.2    | 102.6  | 97.2   | SLC36A2   | <a href="#">NM_181776.1</a> | PAT2;TRAMD1                         | amino      | membran     | amino        |
| GI_32401458-S | 643.5   | 546.8  | 534.7  | FLJ11088  | <a href="#">NM_018318.2</a> | p56                                 |            |             |              |
| GI_32401472-S | 175.5   | 226.5  | 202.8  | BTLA      | <a href="#">NM_181780.1</a> | BTLA1                               |            |             |              |
| GI_32441270-S | 89.2    | 100.7  | 95.9   | DCDC1     | <a href="#">NM_181807.1</a> |                                     |            |             | intracellula |
| GI_32441272-S | 114     | 119.5  | 103.4  | BMP8A     | <a href="#">NM_181809.1</a> |                                     | growth     |             | growth       |
| GI_32441282-I | 124.6   | 125.6  | 137.7  | RALGPS2   | <a href="#">NM_152663.2</a> | FLJ10244;FLJ25604                   | guanyl-    |             | intracellula |
| GI_32451491-I | 90.3    | 98.3   | 97.3   | C14orf29  | <a href="#">NM_181533.3</a> | c14_5314                            |            |             |              |
| GI_32454730-I | 84.7    | 88.8   | 92.4   | WINS1     | <a href="#">NM_181739.1</a> | FLJ10583                            |            |             |              |
| GI_32454732-A | 283.2   | 309.9  | 301.4  | WINS1     | <a href="#">NM_181740.1</a> | FLJ10583                            |            |             |              |
| GI_32454732-I | 127.1   | 120.5  | 116.9  | WINS1     | <a href="#">NM_181740.1</a> | FLJ10583                            |            |             |              |
| GI_32454736-A | 342.9   | 408    | 358.3  | TRIM3     | <a href="#">NM_033278.2</a> | BERP;HAC1;RNF22;RNF97               | protein C- | kinesin     | neurogene    |
| GI_32454738-I | 415.5   | 575.5  | 469.3  | TRIM3     | <a href="#">NM_006458.2</a> | BERP;HAC1;RNF22;RNF97               | protein C- | kinesin     | neurogene    |
| GI_32454740-S | 1475.3  | 2899.9 | 1238.1 | SERPINH1  | <a href="#">NM_001235.2</a> | CBP1;CBP2;gp46;HSP47;RA-            | collagen   | endoplas    | response     |
| GI_32454742-S | 2895.8  | 959.3  | 1063   | SESN2     | <a href="#">NM_031459.3</a> | HI95;SES2;SEST2;DKFZp761M0212;DKFZp |            | nucleus     | cell cycle   |

|               |        |        |        |          |                             |                                     |             |             |             |
|---------------|--------|--------|--------|----------|-----------------------------|-------------------------------------|-------------|-------------|-------------|
| GI_32454743-S | 739.7  | 912.6  | 687.3  | STRN3    | <a href="#">NM_014574.2</a> | SG2NA                               | calmoduli   | kinesin     | cell cycle  |
| GI_32454745-A | 185.4  | 200.6  | 188    | ORC4L    | <a href="#">NM_181741.1</a> | ORC4;ORC4P                          | DNA         | nucleus     | DNA         |
| GI_32454751-S | 850.1  | 703.4  | 624    | ORC2L    | <a href="#">NM_006190.3</a> | ORC2                                | DNA         | nucleus     | DNA         |
| GI_32454752-I | 1936.9 | 1309.2 | 1071.3 | ORC5L    | <a href="#">NM_002553.2</a> | ORC5;ORC5P;ORC5T                    | DNA         | nucleus     | DNA         |
| GI_32454753-A | 238.5  | 220.5  | 176.7  | ORC5L    | <a href="#">NM_181747.1</a> | ORC5;ORC5P;ORC5T                    | DNA         | nucleus     | DNA         |
| GI_32454753-I | 91.1   | 94.8   | 87.4   | ORC5L    | <a href="#">NM_181747.1</a> | ORC5;ORC5P;ORC5T                    | DNA         | nucleus     | DNA         |
| GI_32454755-S | 181.6  | 176.6  | 177.5  | ORC6L    | <a href="#">NM_014321.2</a> | ORC6                                | DNA         | nucleus     | DNA         |
| GI_32455232-S | 123.3  | 138.1  | 116.8  | LAD1     | <a href="#">NM_005558.3</a> | LadA;MGC10355                       | structural  | basement    |             |
| GI_32455233-S | 315.2  | 325.8  | 336.7  | LCMT2    | <a href="#">NM_014793.3</a> | MGC9534;KIAA0547                    |             |             |             |
| GI_32455234-S | 152.5  | 163.8  | 133.5  | LCN1     | <a href="#">NM_002297.2</a> | TP;PMFA;VEGP                        | cysteine    |             | proteolysis |
| GI_32455235-S | 186.4  | 223.9  | 198.1  | HELB     | <a href="#">NM_033647.2</a> |                                     |             |             |             |
| GI_32455237-A | 2058.3 | 2206.7 | 1029.6 | HSD11B1  | <a href="#">NM_005525.2</a> | HDL;11-DH;HSD11L;MGC13539;11-beta-  | 11-beta-    | microsom    | steroid     |
| GI_32455237-I | 105.9  | 107.8  | 111.3  | HSD11B1  | <a href="#">NM_005525.2</a> | HDL;11-DH;HSD11L;MGC13539;11-beta-  | 11-beta-    | microsom    | steroid     |
| GI_32455240-S | 72.4   | 93.3   | 89.2   | HAPLN3   | <a href="#">NM_178232.2</a> | HsT19883                            | hyaluronic  |             | cell        |
| GI_32455241-S | 93     | 99     | 101.5  | HGFAC    | <a href="#">NM_001528.2</a> | HGFA                                | serine-     | extracellul | proteolysis |
| GI_32455242-S | 2726.5 | 3076.4 | 3608.6 | PPP2R1A  | <a href="#">NM_014225.3</a> | MGC786                              | protein     |             |             |
| GI_32455243-A | 236.6  | 295    | 301.5  | PPP2R1B  | <a href="#">NM_181699.1</a> | MGC26454                            | protein     |             |             |
| GI_32455243-I | 135.5  | 149.9  | 136.3  | PPP2R1B  | <a href="#">NM_181699.1</a> | MGC26454                            | protein     |             |             |
| GI_32455245-I | 277.1  | 336.6  | 303.6  | PPP2R1B  | <a href="#">NM_002716.3</a> | MGC26454                            | protein     |             |             |
| GI_32455247-I | 187.5  | 221.2  | 187.6  | PIK3R1   | <a href="#">NM_181523.1</a> | GRB1;p85-ALPHA                      |             |             |             |
| GI_32455249-I | 105.1  | 113.8  | 100.3  | PIK3R1   | <a href="#">NM_181524.1</a> | GRB1;p85-ALPHA                      |             |             |             |
| GI_32455251-A | 312.7  | 231.4  | 466.5  | PIK3R1   | <a href="#">NM_181504.2</a> | GRB1;p85-ALPHA                      |             |             |             |
| GI_32455251-I | 81.2   | 88     | 78.5   | PIK3R1   | <a href="#">NM_181504.2</a> | GRB1;p85-ALPHA                      |             |             |             |
| GI_32455253-A | 1419.2 | 1603.1 | 1607.4 | LASS2    | <a href="#">NM_013384.3</a> | L3;SP260;TMSG1;MGC987;FLJ10243      | transcripti | nucleus     | regulation  |
| GI_32455258-I | 2353.4 | 1961.6 | 2020   | PRDX5    | <a href="#">NM_012094.3</a> | PLP;ACR1;B166;PRXV;PMP20;PRDX6;SBBI | electron    | peroxisom   | respiratory |
| GI_32455261-A | 8220.4 | 7451.5 | 7471   | PRDX5    | <a href="#">NM_181652.1</a> | PLP;ACR1;B166;PRXV;PMP20;PRDX6;SBBI | electron    | peroxisom   | respiratory |
| GI_32455265-A | 9694.7 | 14289  | 11917  | PRDX1    | <a href="#">NM_181697.1</a> | PAG;PAGA;PAGB;MSP23;NKEFA;TDPX2     | peroxidase  |             | skeletal    |
| GI_32455268-S | 261.9  | 264.2  | 185.2  | PKE      | <a href="#">NM_173575.2</a> | MGC23665                            | ATP         |             | protein     |
| GI_32455270-S | 355.2  | 471.3  | 479.1  | POMT2    | <a href="#">NM_013382.3</a> |                                     | mannosylt   | membran     | O-linked    |
| GI_32455272-S | 134.9  | 128.3  | 118    | PRKWNK2  | <a href="#">NM_006648.3</a> | WNK2;NY-CO-43;SDCCAG43;P/OKcl.13    | ATP         |             | protein     |
| GI_32469494-S | 175.5  | 195.5  | 179.9  | TRIK     | <a href="#">NM_181840.1</a> | TRESK                               | ion         | membran     | potassium   |
| GI_32469500-S | 135.8  | 157.4  | 160.6  | TMC3     | <a href="#">NM_181841.1</a> |                                     |             |             |             |
| GI_32469508-S | 179.6  | 167.4  | 151.3  | C6orf46  | <a href="#">NM_181842.1</a> | G10;NG35;D6S59E                     | protein     | nucleus     | regulation  |
| GI_32469514-S | 496.5  | 426.4  | 458.8  | NUDT8    | <a href="#">NM_181843.1</a> |                                     |             |             |             |
| GI_32479518-A | 210.1  | 163    | 199.6  | DVL1     | <a href="#">NM_181870.1</a> | DVL;MGC54245                        | signal      | cytoplasm   | heart       |
| GI_32479520-I | 152.9  | 154.8  | 150.2  | DVL1     | <a href="#">NM_004421.2</a> | DVL;MGC54245                        | signal      | cytoplasm   | heart       |
| GI_32479522-A | 130.9  | 122.4  | 134.4  | KCNQ1    | <a href="#">NM_181797.1</a> | LQT;RWS;WRS;LQT1;KCNA8;KCNA9;Kv1.9  | delayed     | voltage-    | potassium   |
| GI_32479522-I | 116.6  | 110.3  | 108.9  | KCNQ1    | <a href="#">NM_181797.1</a> | LQT;RWS;WRS;LQT1;KCNA8;KCNA9;Kv1.9  | delayed     | voltage-    | potassium   |
| GI_32479524-I | 159.6  | 178.5  | 157.7  | KCNQ1    | <a href="#">NM_181798.1</a> | LQT;RWS;WRS;LQT1;KCNA8;KCNA9;Kv1.9  | delayed     | voltage-    | potassium   |
| GI_32479526-I | 124.3  | 144.1  | 144.1  | KCNQ1    | <a href="#">NM_000218.2</a> | LQT;RWS;WRS;LQT1;KCNA8;KCNA9;Kv1.9  | delayed     | voltage-    | potassium   |
| GI_32481204-A | 155.4  | 164.6  | 290.3  | LAIR2    | <a href="#">NM_021270.2</a> |                                     |             |             |             |
| GI_32481205-S | 95.6   | 87.2   | 95.4   | LCT      | <a href="#">NM_002299.2</a> | LAC;LPH                             | lactase     | membran     | carbohydr   |
| GI_32481207-I | 106.8  | 127.5  | 117.7  | MAPKAPK2 | <a href="#">NM_004759.3</a> |                                     | protein     | nucleus     | MAPKKK      |
| GI_32481208-A | 821.7  | 920.8  | 750.2  | MAPKAPK2 | <a href="#">NM_032960.2</a> |                                     | protein     | nucleus     | MAPKKK      |

|               |        |        |        |         |                             |                                    |             |              |              |
|---------------|--------|--------|--------|---------|-----------------------------|------------------------------------|-------------|--------------|--------------|
| GI_32481210-S | 131.9  | 147    | 130.4  | NALP5   | <a href="#">NM_153447.2</a> | MATER                              | ATP         |              |              |
| GI_32481212-S | 1024.8 | 1291.8 | 1029.2 | MK-STYX | <a href="#">NM_016086.2</a> |                                    | protein     | intracellula |              |
| GI_32481214-S | 121    | 121.3  | 128.9  | CD19    | <a href="#">NM_001770.3</a> | B4;MGC12802                        | receptor    | integral to  | cell         |
| GI_32481215-I | 231.5  | 238    | 214    | COG5    | <a href="#">NM_006348.2</a> | GTC90;GOLTC1                       | protein     | membran      | intra-Golgi  |
| GI_32481217-A | 333.9  | 256.5  | 263.4  | COG5    | <a href="#">NM_181733.1</a> | GTC90;GOLTC1                       | protein     | membran      | intra-Golgi  |
| GI_32483356-S | 852.6  | 833.8  | 700.8  | DHRS4   | <a href="#">NM_021004.2</a> | SDR-SRL;humNRDR;FLJ11008;SCAD-SRL  | electron    | peroxisom    | carbohydr    |
| GI_32483362-A | 290.3  | 293.6  | 217    | APAF1   | <a href="#">NM_181869.1</a> | CED4                               | caspase     | cytosol      | neurogene    |
| GI_32483368-A | 574.8  | 575.8  | 491.9  | ORC3L   | <a href="#">NM_181837.1</a> | LAT;ORC3;LATHEO                    | DNA         | nucleus      | DNA          |
| GI_32483370-A | 558    | 328.9  | 406.2  | GEM     | <a href="#">NM_181702.1</a> | KIR;MGC26294                       | GTP         | peripheral   | cell growth  |
| GI_32483372-I | 143.7  | 123.8  | 107.1  | GEM     | <a href="#">NM_005261.2</a> | KIR;MGC26294                       | GTP         | peripheral   | cell growth  |
| GI_32483373-S | 1228.5 | 858.5  | 457.8  | NOL5A   | <a href="#">NM_006392.2</a> | NOP56                              | RNA         | nucleolus    | ribosome     |
| GI_32483375-S | 1728.9 | 1487.3 | 1129.6 | NYREN18 | <a href="#">NM_016118.3</a> | NUB1                               | molecular   | nucleus      | biological_  |
| GI_32483376-A | 2292.9 | 2714   | 2797.4 | PRDX3   | <a href="#">NM_014098.2</a> | AOP1;MER5;AOP-1;SP-                | alkyl       | mitochond    | peroxidas    |
| GI_32483379-S | 141.1  | 160.5  | 141.8  | ICOS    | <a href="#">NM_012092.2</a> | AILIM;MGC39850                     | receptor    | integral to  | positive     |
| GI_32483382-I | 124.5  | 149.7  | 148.2  | PKIG    | <a href="#">NM_181805.1</a> |                                    | cAMP-       |              | negative     |
| GI_32483384-A | 604.2  | 884.1  | 862.1  | PKIG    | <a href="#">NM_007066.3</a> |                                    | cAMP-       |              | negative     |
| GI_32483385-A | 543.8  | 531.4  | 479.4  | PKIA    | <a href="#">NM_181839.1</a> | PRKACN1                            | cAMP-       |              | negative     |
| GI_32483387-I | 146.8  | 173    | 157.7  | PKIA    | <a href="#">NM_006823.2</a> | PRKACN1                            | cAMP-       |              | negative     |
| GI_32483388-A | 96.7   | 117.1  | 104.2  | PKIB    | <a href="#">NM_032471.4</a> | PRKACN2                            | cAMP-       |              | negative     |
| GI_32483389-I | 98.7   | 97     | 80.8   | PKIB    | <a href="#">NM_181794.1</a> | PRKACN2                            | cAMP-       |              | negative     |
| GI_32483393-A | 579.7  | 505.2  | 678.6  | CLTB    | <a href="#">NM_001834.2</a> | LCB                                | calcium     | coated pit   | intracellula |
| GI_32483394-I | 93.3   | 88.1   | 97.5   | CLTB    | <a href="#">NM_007097.2</a> | LCB                                | calcium     | coated pit   | intracellula |
| GI_32483395-S | 177.3  | 190.1  | 172.5  | DGKI    | <a href="#">NM_004717.2</a> | DGK-IOTA                           | diacylglyc  | cytoplasm    | protein      |
| GI_32483396-S | 224.5  | 260.8  | 221.8  | DRD4    | <a href="#">NM_000797.2</a> | D4DR                               | dopamine    | integral to  | dopamine     |
| GI_32483398-S | 976.2  | 1138.8 | 1047.4 | PAK2    | <a href="#">NM_002577.2</a> | PAK65;PAKgamma                     | protein     |              | negative     |
| GI_32483400-S | 106.2  | 98.4   | 104.5  | PCK1    | <a href="#">NM_002591.2</a> | PEPCK1;PEPCKC;MGC22652             | phosphoe    | cytosol      | glucose      |
| GI_32483402-S | 101.2  | 109.8  | 98.8   | PDYN    | <a href="#">NM_024411.2</a> | MGC26418                           | opioid      | plasma       | neuropepti   |
| GI_32483407-A | 476.9  | 558.4  | 538.6  | GABPB2  | <a href="#">NM_016655.2</a> | E4TF1;GABPB;BABPB2;E4TF1B;GABPB1;N | transcripti | nucleus      | regulation   |
| GI_32483408-S | 191.5  | 226.8  | 208.5  | GATA1   | <a href="#">NM_002049.2</a> | GF1;NFE1;ERYF1                     | transcripti | nucleus      | regulation   |
| GI_32483409-S | 108.8  | 105.1  | 113.2  | GC      | <a href="#">NM_000583.2</a> | DBP;VDBG;VDBP                      | vitamin D   | extracellul  | vitamin/co   |
| GI_32483411-A | 119.4  | 119.9  | 116.2  | GJA5    | <a href="#">NM_181703.1</a> | CX40;MGC11185                      | connexon    | gap          | intercellula |
| GI_32483411-I | 121.9  | 110    | 108.4  | GJA5    | <a href="#">NM_181703.1</a> | CX40;MGC11185                      | connexon    | gap          | intercellula |
| GI_32483413-I | 88.6   | 87.4   | 90.2   | GJA5    | <a href="#">NM_005266.4</a> | CX40;MGC11185                      | connexon    | gap          | intercellula |
| GI_32483414-S | 136.1  | 133.5  | 140    | GZMB    | <a href="#">NM_004131.3</a> | HLP;CCPI;CGL1;CSPB;SECT;CGL-1;CSP- | granzyme    | cytoplasm    | proteolysis  |
| GI_32483415-S | 108.3  | 117.8  | 120.4  | NEFH    | <a href="#">NM_021076.2</a> | NFH;KIAA0845                       | molecular   | neurofilam   | neurogene    |
| GI_32484972-I | 454.3  | 457.9  | 445.7  | ADK     | <a href="#">NM_001123.2</a> | AK                                 | adenosine   |              | ribonucleo   |
| GI_32484974-A | 4261.4 | 3933   | 3678.6 | ADK     | <a href="#">NM_006721.2</a> | AK                                 | adenosine   |              | ribonucleo   |
| GI_32484974-I | 201.7  | 198.5  | 161.1  | ADK     | <a href="#">NM_006721.2</a> | AK                                 | adenosine   |              | ribonucleo   |
| GI_32484976-S | 96     | 106.8  | 87.2   | AMOTL2  | <a href="#">NM_016201.2</a> | LCCP;KIAA0989                      |             |              |              |
| GI_32484978-S | 1152   | 1350.5 | 1475.3 | AP3B1   | <a href="#">NM_003664.3</a> | PE;HPS;HPS2;ADTB3;ADTB3A           | protein     | Golgi        | intracellula |
| GI_32484980-S | 144.2  | 154.9  | 134.5  | BANK1   | <a href="#">NM_017935.2</a> | BANK;FLJ20706                      | pancreatic  | nucleus      | metabolis    |
| GI_32484984-S | 166.1  | 201.2  | 167.9  | FS      | <a href="#">NM_021996.3</a> | MGC44848;UDP-GalNAc                | transferas  | membran      | glycolipid   |
| GI_32484986-S | 383.1  | 481    | 399.3  | HCA112  | <a href="#">NM_018487.2</a> |                                    |             |              |              |
| GI_32484988-S | 1986.3 | 1702.2 | 1892.4 | MTR3    | <a href="#">NM_058219.2</a> |                                    |             |              |              |

|               |        |        |        |            |                             |                                     |             |             |               |
|---------------|--------|--------|--------|------------|-----------------------------|-------------------------------------|-------------|-------------|---------------|
| GI_32484989-S | 1952.4 | 2407.5 | 3008.3 | WSB2       | <a href="#">NM_018639.3</a> | SBA2;MGC10210                       |             |             | intracellular |
| GI_32490556-S | 2015.4 | 1981.6 | 1455.2 | PAPOLA     | <a href="#">NM_032632.2</a> | PAP;MGC5378                         | RNA         | cytoplasm   | mRNA          |
| GI_32490558-S | 5366.5 | 4633.7 | 4437.2 | LRP10      | <a href="#">NM_014045.2</a> | MGC8675;DKFZP564C1940               |             |             |               |
| GI_32490566-S | 146.4  | 143.2  | 150.6  | GPR100     | <a href="#">NM_181885.1</a> | GPCR142                             | angiotensi  | integral to | G-protein     |
| GI_32490571-S | 4278.7 | 3507.4 | 2704.3 | EPB41L3    | <a href="#">NM_012307.2</a> | 4.1B;DAL1;DAL-1;KIAA0987            | actin       | cytoskelet  | biological_   |
| GI_32490573-A | 101.8  | 117.3  | 114.8  | DMRT2      | <a href="#">NM_181872.1</a> |                                     | transcripti | nucleus     | male          |
| GI_32490578-A | 2980.3 | 2748.2 | 2446.3 | CRA        | <a href="#">NM_181873.1</a> |                                     |             |             |               |
| GI_32490578-I | 261.6  | 272.4  | 230.6  | CRA        | <a href="#">NM_181873.1</a> |                                     |             |             |               |
| GI_32490588-A | 123.9  | 133.3  | 102.9  | PRX        | <a href="#">NM_181882.1</a> | CMT4F;KIAA1620                      | molecular   | membran     | nerve         |
| GI_32526889-S | 317.1  | 343.7  | 376.4  | FLJ40629   | <a href="#">NM_152515.2</a> | MGC39683                            | DNA         | nucleus     | regulation    |
| GI_32526891-S | 207.6  | 225.7  | 196    | FLJ25200   | <a href="#">NM_144715.2</a> |                                     |             |             |               |
| GI_32526893-S | 136.8  | 139    | 130.8  | FLJ35834   | <a href="#">NM_178827.3</a> |                                     |             |             |               |
| GI_32526895-A | 249.6  | 285.2  | 281.3  | HSPC056    | <a href="#">NM_015396.2</a> | DKFZP434A043                        |             |             |               |
| GI_32526895-I | 1162.9 | 1026.3 | 1164.8 | HSPC056    | <a href="#">NM_015396.2</a> | DKFZP434A043                        |             |             |               |
| GI_32526899-S | 227.8  | 264.9  | 264.7  | DCL-1      | <a href="#">NM_014880.3</a> | BIMLEC;KIAA0022                     | sugar       | integral to | heterophili   |
| GI_32526900-I | 228.3  | 289.1  | 234.3  | CDV-1      | <a href="#">NM_014055.2</a> | CDV1;CDV1R;MGC4027                  |             |             |               |
| GI_32526906-S | 76.9   | 105.8  | 117.8  | FOXQ1      | <a href="#">NM_033260.2</a> | HFH1                                | transcripti | nucleus     | regulation    |
| GI_32526910-S | 134.3  | 163.4  | 179.6  | DKFZp434L1 | <a href="#">NM_016613.4</a> | AD021;AD036                         |             |             |               |
| GI_32526912-S | 98.9   | 110.9  | 99.2   | FLJ25453   | <a href="#">NM_153716.1</a> | HSFY                                | transcripti | nucleus     | regulation    |
| GI_32528262-I | 101.5  | 102.2  | 96.7   | CDK10      | <a href="#">NM_003674.2</a> | PISSLRE                             | cyclin-     |             | negative      |
| GI_32528264-A | 1567.7 | 1458.9 | 1441.1 | CDK10      | <a href="#">NM_052987.2</a> | PISSLRE                             | cyclin-     |             | negative      |
| GI_32528265-I | 209.8  | 256.6  | 228.2  | CDK10      | <a href="#">NM_052988.2</a> | PISSLRE                             | cyclin-     |             | negative      |
| GI_32528267-I | 95.6   | 92.5   | 94.3   | GRM7       | <a href="#">NM_181874.1</a> | GLUR7;mGlu7;GPRC1G;MGLUR7           | metabotro   | integral to | negative      |
| GI_32528269-A | 168.9  | 211.3  | 193.4  | GRM7       | <a href="#">NM_181875.1</a> | GLUR7;mGlu7;GPRC1G;MGLUR7           | metabotro   | integral to | negative      |
| GI_32528269-I | 95.1   | 106.7  | 91.1   | GRM7       | <a href="#">NM_181875.1</a> | GLUR7;mGlu7;GPRC1G;MGLUR7           | metabotro   | integral to | negative      |
| GI_32528272-A | 102.5  | 93.3   | 91     | GRIA3      | <a href="#">NM_181894.1</a> | GLUR3;GLURC;GLUR-K3                 | alpha-      | integral to | small         |
| GI_32528272-I | 125    | 133.6  | 119.2  | GRIA3      | <a href="#">NM_181894.1</a> | GLUR3;GLURC;GLUR-K3                 | alpha-      | integral to | small         |
| GI_32528277-I | 90     | 102.8  | 92.4   | BACH       | <a href="#">NM_181862.1</a> | ACT;ACH1;LACH1;hBACH;CTE-II;MGC1126 | acyl-CoA    | cytoplasm   | lipid         |
| GI_32528281-I | 192.4  | 286.6  | 375.8  | BACH       | <a href="#">NM_181864.1</a> | ACT;ACH1;LACH1;hBACH;CTE-II;MGC1126 | acyl-CoA    | cytoplasm   | lipid         |
| GI_32528283-I | 102.2  | 97     | 98.2   | BACH       | <a href="#">NM_181865.1</a> | ACT;ACH1;LACH1;hBACH;CTE-II;MGC1126 | acyl-CoA    | cytoplasm   | lipid         |
| GI_32528285-A | 4806.8 | 10179  | 13094  | BACH       | <a href="#">NM_181866.1</a> | ACT;ACH1;LACH1;hBACH;CTE-II;MGC1126 | acyl-CoA    | cytoplasm   | lipid         |
| GI_32528285-I | 241.5  | 1169.9 | 1186.6 | BACH       | <a href="#">NM_181866.1</a> | ACT;ACH1;LACH1;hBACH;CTE-II;MGC1126 | acyl-CoA    | cytoplasm   | lipid         |
| GI_32528290-I | 103.8  | 107.4  | 108.7  | COVA1      | <a href="#">NM_182314.1</a> | APK1;tNOX                           | protein     | cytosol     | electron      |
| GI_32528292-A | 189.3  | 238.2  | 202.4  | COVA1      | <a href="#">NM_006375.2</a> | APK1;tNOX                           | protein     | cytosol     | electron      |
| GI_32528294-I | 314.1  | 207.2  | 201.6  | RPS6KA5    | <a href="#">NM_004755.2</a> | MSK1;RLPK;MSPK1;MGC1911             | protein     | nucleus     | DNA           |
| GI_32528296-A | 136.8  | 120.1  | 110    | RPS6KA5    | <a href="#">NM_182398.1</a> | MSK1;RLPK;MSPK1;MGC1911             | protein     | nucleus     | DNA           |
| GI_32528296-I | 93.7   | 107.7  | 91.5   | RPS6KA5    | <a href="#">NM_182398.1</a> | MSK1;RLPK;MSPK1;MGC1911             | protein     | nucleus     | DNA           |
| GI_32528298-S | 485.9  | 587.7  | 541.3  | BIRC4      | <a href="#">NM_001167.2</a> | API3;ILP1;MIHA;XIAP                 | apoptosis   | cytosol     | anti-         |
| GI_32528300-S | 396.1  | 455.6  | 391.9  | EPHB4      | <a href="#">NM_004444.3</a> | HTK;MYK1;TYRO11                     | transmem    | integral to | histogene     |
| GI_32528302-S | 110.2  | 117.1  | 94.5   | INSM2      | <a href="#">NM_032594.2</a> | IA-6;mlt1                           |             |             |               |
| GI_32528304-I | 345.3  | 451.5  | 493.7  | PIP5K2B    | <a href="#">NM_003559.3</a> | Pip4k2B;PIP5KIIB                    | 1-          | cytoplasm   | cell          |
| GI_32528305-S | 390.3  | 384.3  | 324.4  | RFC1       | <a href="#">NM_002913.3</a> | A1;RFC;PO-                          | ATP         | DNA         | DNA           |
| GI_32528307-S | 140    | 151.5  | 141.6  | SYT8       | <a href="#">NM_138567.2</a> | DKFZp434K0322                       |             |             |               |
| GI_32528309-A | 113.3  | 105.4  | 87     | C14orf29   | <a href="#">NM_181814.1</a> | c14_5314                            |             |             |               |

|               |        |        |        |            |                             |                                 |             |              |            |
|---------------|--------|--------|--------|------------|-----------------------------|---------------------------------|-------------|--------------|------------|
| GI_32563526-S | 597    | 468.4  | 384.4  | C10orf28   | <a href="#">NM_014472.2</a> | PSORT;GIDRP86                   |             |              |            |
| GI_32567783-S | 399.1  | 483.2  | 418.7  | TBX10      | <a href="#">NM_005995.2</a> |                                 | RNA         | nucleus      | embryoge   |
| GI_32698673-S | 713.3  | 586.2  | 477.7  | TRIP8      | <a href="#">NM_004241.1</a> | FLJ14374;KIAA1380;DKFZp761F0118 | ligand-     | intracellula | regulation |
| GI_32698675-S | 1037.4 | 1310.6 | 3058.6 | LHFPL2     | <a href="#">NM_005779.1</a> | KIAA0206                        |             |              |            |
| GI_32698677-S | 351.2  | 399.6  | 356.3  | ZNF213     | <a href="#">NM_004220.1</a> | CR53                            | transcripti | nucleus      | regulation |
| GI_32698685-S | 120.1  | 137.7  | 123.3  | GALNT5     | <a href="#">NM_014568.1</a> | GALNAC-T5                       | UDP-        |              | N-linked   |
| GI_32698687-S | 542.5  | 511.8  | 500.2  | CIT        | <a href="#">NM_007174.1</a> | CRIK;STK21;KIAA0949             | protein     | kinesin      | protein    |
| GI_32698689-S | 99.5   | 110.2  | 109.4  | HUMPPA     | <a href="#">NM_014603.1</a> |                                 | DNA         | nucleus      | regulation |
| GI_32698691-S | 3750.5 | 3389.3 | 3752.5 | ZDHC8      | <a href="#">NM_013373.1</a> | ZNF378;ZDHC1;KIAA1292           |             | integral to  |            |
| GI_32698693-S | 1439.2 | 1027.7 | 1118.8 | KIAA0276   | <a href="#">NM_015115.1</a> |                                 |             |              |            |
| GI_32698695-S | 1313.3 | 921.7  | 765.5  | MAC30      | <a href="#">NM_014573.1</a> |                                 | molecular   | cellular_co  | regulation |
| GI_32698699-S | 109.1  | 132.3  | 105.5  | KIAA1111   | <a href="#">NM_015107.1</a> |                                 | DNA         |              | regulation |
| GI_32698701-S | 1725.3 | 1760.2 | 1610.5 | HECTD1     | <a href="#">NM_015382.1</a> | KIAA1131                        | ubiquitin-  | intracellula | ubiquitin  |
| GI_32698703-S | 178.1  | 193    | 208.3  | DKFZP434B0 | <a href="#">NM_015395.1</a> |                                 |             |              |            |
| GI_32698709-S | 104.9  | 103.5  | 99     | DKFZP566D1 | <a href="#">NM_015391.1</a> |                                 |             |              |            |
| GI_32698715-S | 210    | 244.1  | 222.4  | HUMRTLH3   | <a href="#">NM_015860.1</a> |                                 |             |              |            |
| GI_32698717-S | 131.7  | 132.4  | 121.1  | C9orf36    | <a href="#">NM_015667.1</a> | DKFZP434B204                    |             |              |            |
| GI_32698727-S | 3082.1 | 2336.9 | 3181.2 | FAM20C     | <a href="#">NM_020223.1</a> | DKFZp547D065                    |             |              |            |
| GI_32698729-S | 189.1  | 268.4  | 209.6  | 182-FIP    | <a href="#">NM_020772.1</a> | KIAA1321                        |             |              |            |
| GI_32698731-S | 650.6  | 706.3  | 895.6  | KIAA1363   | <a href="#">NM_020792.1</a> |                                 | hydrolase   |              | metabolis  |
| GI_32698733-S | 93.1   | 104.9  | 97.8   | DAZ4       | <a href="#">NM_020420.1</a> | pDP1680;pDP1681                 |             |              |            |
| GI_32698735-S | 85.9   | 100    | 102.3  | ARRDC3     | <a href="#">NM_020801.1</a> | KIAA1376                        |             |              | sensory    |
| GI_32698737-S | 233.5  | 310.2  | 266.3  | ZNF471     | <a href="#">NM_020813.1</a> | ERP1;Z1971;KIAA1396             |             | nucleus      |            |
| GI_32698739-S | 400.7  | 367    | 343.8  | SH3MD2     | <a href="#">NM_020870.1</a> | POSH;RNF142;SH3RF1;KIAA1494     |             |              |            |
| GI_32698741-S | 140.2  | 137.8  | 141.5  | KIAA1573   | <a href="#">NM_020925.1</a> |                                 | electron    | membran      | electron   |
| GI_32698743-S | 235.6  | 214.2  | 235.1  | USP37      | <a href="#">NM_020935.1</a> | KIAA1594                        | cysteine-   |              | ubiquitin- |
| GI_32698745-S | 200.8  | 215.1  | 179    | HCN1       | <a href="#">NM_021072.1</a> | BCNG1;HAC-2;BCNG-1              | voltage-    | integral to  | cation     |
| GI_32698747-S | 167    | 162    | 174.2  | ZNF248     | <a href="#">NM_021045.1</a> | bA162G10.3                      | nucleic     | nucleus      | regulation |
| GI_32698749-S | 306.9  | 371.1  | 370.7  | SR-A1      | <a href="#">NM_021228.1</a> |                                 |             |              |            |
| GI_32698751-S | 741.3  | 938    | 943.6  | C20orf177  | <a href="#">NM_022106.1</a> | dJ551D2.5                       |             |              |            |
| GI_32698754-S | 140    | 163    | 119.5  | CPEB4      | <a href="#">NM_030627.1</a> | KIAA1673                        | nucleic     |              |            |
| GI_32698756-S | 2453.9 | 877    | 180.9  | LOC81569   | <a href="#">NM_030812.1</a> |                                 |             |              |            |
| GI_32698758-S | 92.6   | 115.2  | 97.3   | SYT14L     | <a href="#">NM_031914.1</a> | yt14r;syt14r;Strep14;CHR14SYT   | transporte  | membran      | transport  |
| GI_32698760-S | 162.9  | 146.1  | 166.9  | ZNF528     | <a href="#">NM_032423.1</a> | KIAA1827                        |             |              |            |
| GI_32698762-S | 144.3  | 140.6  | 126.4  | FBXL10     | <a href="#">NM_032590.1</a> | CXXC2;PCCX2                     |             |              |            |
| GI_32698764-S | 159.3  | 186.2  | 161    | FGD3       | <a href="#">NM_033086.1</a> | ZFYVE5;FLJ00004                 | zinc ion    |              |            |
| GI_32698766-S | 329.6  | 358.7  | 332.6  | KUB3       | <a href="#">NM_033276.1</a> |                                 | metallope   | DNA-         | double-    |
| GI_32698768-S | 226.5  | 157.7  | 154    | FLJ00058   | <a href="#">NM_052847.1</a> |                                 |             |              |            |
| GI_32698770-S | 111.6  | 117.7  | 133.2  | KIAA1893   | <a href="#">NM_052899.1</a> |                                 |             |              |            |
| GI_32698772-S | 1162.3 | 1230.7 | 694    | C8orf13    | <a href="#">NM_053279.1</a> | D8S265;DKFZp761G151             |             | kinesin      |            |
| GI_32698774-S | 135.5  | 143.1  | 132.8  | ZNF431     | <a href="#">NM_133473.1</a> | KIAA1969                        | nucleic     | intracellula | regulation |
| GI_32698776-S | 400.5  | 409.6  | 676.4  | FLJ34969   | <a href="#">NM_152678.1</a> |                                 |             |              |            |
| GI_32698778-S | 169.7  | 151.9  | 112.4  | MGC45474   | <a href="#">NM_152369.2</a> |                                 |             |              |            |
| GI_32698779-S | 90.7   | 92.4   | 92.1   | CMYA5      | <a href="#">NM_153610.2</a> | DKFZp451G182                    |             |              |            |

|               |        |        |        |            |                             |                         |            |              |             |
|---------------|--------|--------|--------|------------|-----------------------------|-------------------------|------------|--------------|-------------|
| GI_32698783-S | 182.7  | 249.4  | 212.1  | GPR120     | <a href="#">NM_181745.1</a> | PGR4                    | receptor   | integral to  | G-protein   |
| GI_32698785-S | 480.3  | 481.8  | 429.9  | ZNF227     | <a href="#">NM_182490.1</a> |                         | nucleic    | intracellula | regulation  |
| GI_32698787-S | 109.4  | 132.5  | 121.8  | LOC124773  | <a href="#">NM_181707.1</a> |                         |            |              |             |
| GI_32698789-S | 108.6  | 111    | 93.6   | LOC346673  | <a href="#">NM_182489.1</a> |                         |            |              |             |
| GI_32698791-S | 102    | 112.4  | 105.8  | POLN       | <a href="#">NM_181808.1</a> | POL4P                   | DNA-       |              | DNA         |
| GI_32698794-S | 215.4  | 245.8  | 249.8  | LOC169611  | <a href="#">NM_182487.1</a> |                         | latrotoxin | membran      |             |
| GI_32698814-S | 104.4  | 122.9  | 106.9  | USP12      | <a href="#">NM_182488.1</a> | USP12L1                 | cysteine-  | cellular_co  | ubiquitin-  |
| GI_32698821-S | 848.7  | 525.4  | 484.3  | LOC90637   | <a href="#">NM_182491.1</a> |                         | electron   |              | electron    |
| GI_32698823-S | 228.3  | 256.3  | 231.2  | DKFZp43400 | <a href="#">NM_182492.1</a> |                         |            | membran      |             |
| GI_32698825-S | 106.6  | 123.4  | 101.8  | LOC91807   | <a href="#">NM_182493.1</a> |                         | ATP        |              | protein     |
| GI_32698827-S | 98.7   | 99.4   | 91.2   | LOC119395  | <a href="#">NM_182494.1</a> |                         |            |              |             |
| GI_32698829-S | 89.5   | 89.4   | 84.5   | FLJ40089   | <a href="#">NM_182496.1</a> |                         |            |              |             |
| GI_32698831-S | 100    | 100.5  | 104.2  | FLJ36600   | <a href="#">NM_182497.1</a> |                         |            |              |             |
| GI_32698834-S | 114.4  | 147.7  | 141    | DKFZp434M2 | <a href="#">NM_182499.1</a> |                         |            |              |             |
| GI_32698836-S | 88     | 97     | 89.3   | FLJ25143   | <a href="#">NM_182500.1</a> |                         |            |              |             |
| GI_32698840-S | 97.3   | 107    | 102.2  | DKFZp686L1 | <a href="#">NM_182502.1</a> |                         | trypsin    |              | proteolysis |
| GI_32698844-S | 103.3  | 98     | 94.9   | DEADC1     | <a href="#">NM_182503.1</a> | dJ20N2.1;DKFZp686L1118  | zinc ion   |              |             |
| GI_32698850-S | 225.8  | 307.5  | 269.7  | FLJ32965   | <a href="#">NM_182506.1</a> |                         |            |              |             |
| GI_32698852-S | 1517.6 | 1031.4 | 1678.4 | LOC144501  | <a href="#">NM_182507.1</a> |                         |            |              |             |
| GI_32698854-S | 123.7  | 136.4  | 129.4  | FLJ40919   | <a href="#">NM_182508.1</a> |                         |            |              |             |
| GI_32698858-S | 111.5  | 114.7  | 110.7  | FLJ32252   | <a href="#">NM_182510.1</a> |                         | DNA        | nucleus      | regulation  |
| GI_32698863-S | 366.8  | 431.8  | 399.5  | MGC52423   | <a href="#">NM_182517.1</a> |                         |            |              |             |
| GI_32698865-S | 250.1  | 376.1  | 490.8  | Spc24      | <a href="#">NM_182513.1</a> | FLJ90806                |            |              |             |
| GI_32698867-S | 98.7   | 87.1   | 87.5   | C20orf186  | <a href="#">NM_182519.1</a> | RY2G5;LPLUNC4;dJ726C3.5 | lipid      |              |             |
| GI_32698869-S | 109    | 106.9  | 97.7   | FLJ32011   | <a href="#">NM_182516.1</a> |                         |            |              |             |
| GI_32698871-S | 115.3  | 130.3  | 103.1  | ZSWIM2     | <a href="#">NM_182521.1</a> | ZZZ2;MGC33890           | zinc ion   |              |             |
| GI_32698873-S | 183.9  | 218.5  | 227.4  | LOC149469  | <a href="#">NM_182518.1</a> |                         |            |              |             |
| GI_32698875-S | 660.1  | 641    | 583.5  | MGC61571   | <a href="#">NM_182523.1</a> |                         |            |              |             |
| GI_32698877-S | 203.5  | 238.6  | 205.5  | FLJ36561   | <a href="#">NM_182520.1</a> |                         |            |              |             |
| GI_32698879-S | 87.6   | 97.7   | 86.4   | FLJ32770   | <a href="#">NM_182525.1</a> |                         |            |              |             |
| GI_32698883-S | 117.2  | 114.8  | 104.6  | CABP7      | <a href="#">NM_182527.1</a> | MGC57793                | calcium    |              |             |
| GI_32698885-S | 120.7  | 130.8  | 110.9  | ZNF595     | <a href="#">NM_182524.1</a> |                         | nucleic    | intracellula | regulation  |
| GI_32698887-S | 97.2   | 89.2   | 93.7   | THAP5      | <a href="#">NM_182529.1</a> |                         |            |              |             |
| GI_32698889-S | 112.5  | 94.8   | 96.6   | FLJ33387   | <a href="#">NM_182526.1</a> |                         |            |              |             |
| GI_32698891-S | 158.5  | 159.3  | 137.6  | FLJ31875   | <a href="#">NM_182531.1</a> |                         | nucleic    | intracellula | regulation  |
| GI_32698893-S | 176.9  | 170.7  | 499.3  | LOC165257  | <a href="#">NM_182528.1</a> |                         |            |              |             |
| GI_32698895-S | 239.8  | 295.8  | 216.5  | FLJ31031   | <a href="#">NM_182533.1</a> |                         |            |              |             |
| GI_32698897-S | 211    | 274.3  | 244    | FLJ25056   | <a href="#">NM_182530.1</a> |                         |            |              |             |
| GI_32698899-S | 117.6  | 138.7  | 125.6  | LOC200261  | <a href="#">NM_182535.1</a> |                         |            |              |             |
| GI_32698901-S | 104.8  | 125.6  | 117.6  | LOC199964  | <a href="#">NM_182532.1</a> |                         |            |              |             |
| GI_32698903-S | 128.1  | 132.5  | 112.9  | HTR3D      | <a href="#">NM_182537.1</a> |                         | receptor   |              |             |
| GI_32698905-S | 87.8   | 110.4  | 89     | FLJ23703   | <a href="#">NM_182534.1</a> |                         |            |              |             |
| GI_32698909-S | 125.8  | 130.3  | 141.6  | MGC33600   | <a href="#">NM_182539.1</a> |                         |            |              |             |
| GI_32698911-S | 149.6  | 161.9  | 156.9  | LOC203522  | <a href="#">NM_182540.1</a> |                         |            |              |             |



|               |       |        |       |            |                             |          |            |                      |
|---------------|-------|--------|-------|------------|-----------------------------|----------|------------|----------------------|
| GI_32698913-S | 170   | 214.3  | 181.7 | MGC39655   | <a href="#">NM_182541.1</a> |          |            |                      |
| GI_32698915-S | 117.2 | 134.4  | 135.4 | FLJ32682   | <a href="#">NM_182542.1</a> |          |            |                      |
| GI_32698917-S | 426.7 | 437.1  | 348.2 | NOPD1      | <a href="#">NM_182543.1</a> | FLJ23743 | S-         |                      |
| GI_32698923-S | 119.7 | 140.4  | 119.6 | MGC40170   | <a href="#">NM_182550.1</a> |          | DNA        | nucleus regulation   |
| GI_32698925-S | 94.3  | 97     | 87    | MGC33530   | <a href="#">NM_182546.1</a> |          |            |                      |
| GI_32698931-S | 149.7 | 155    | 138.2 | LOC282966  | <a href="#">NM_182554.1</a> |          |            |                      |
| GI_32698933-S | 95.8  | 123.7  | 120.2 | UNQ1849    | <a href="#">NM_182551.1</a> | FLJ37965 | acyltransf | metabolis            |
| GI_32698935-S | 362.6 | 354.1  | 342.3 | BCL9L      | <a href="#">NM_182557.1</a> | DLNB11   |            |                      |
| GI_32698937-S | 446.6 | 577    | 763.1 | MGC50896   | <a href="#">NM_182553.1</a> |          |            |                      |
| GI_32698939-S | 174.1 | 194.8  | 157   | MGC57341   | <a href="#">NM_182559.1</a> |          | trypsin    | proteolysis          |
| GI_32698941-S | 331.6 | 465.3  | 491.5 | LOC283130  | <a href="#">NM_182556.1</a> |          |            |                      |
| GI_32698943-S | 84.8  | 96.7   | 83.3  | FLJ36144   | <a href="#">NM_182561.1</a> |          |            |                      |
| GI_32698945-S | 97.6  | 102.8  | 99.4  | FLJ33810   | <a href="#">NM_182558.1</a> |          |            |                      |
| GI_32698947-S | 100.8 | 104.4  | 103   | GDDR       | <a href="#">NM_182536.1</a> |          |            |                      |
| GI_32698951-S | 100   | 132.8  | 107.8 | FLJ25773   | <a href="#">NM_182560.1</a> |          |            |                      |
| GI_32698955-S | 135.7 | 142.9  | 162   | FLJ39743   | <a href="#">NM_182562.1</a> |          |            |                      |
| GI_32698957-S | 123.8 | 129.5  | 116.3 | FLJ34690   | <a href="#">NM_182567.1</a> |          |            |                      |
| GI_32698959-S | 97.9  | 106.3  | 99.8  | FLJ40319   | <a href="#">NM_182564.1</a> |          |            |                      |
| GI_32698961-S | 199.9 | 172.5  | 141.1 | FLJ37451   | <a href="#">NM_182569.1</a> |          | glyceroph  | glycerol             |
| GI_32698963-S | 115.9 | 122.9  | 122   | LOC284013  | <a href="#">NM_182566.1</a> |          |            |                      |
| GI_32698967-S | 117.2 | 131.2  | 126.6 | FLJ36492   | <a href="#">NM_182568.1</a> |          |            |                      |
| GI_32698969-S | 186.8 | 233.6  | 206.5 | FLJ36070   | <a href="#">NM_182574.1</a> |          | DNA        | nucleus              |
| GI_32698971-S | 105.6 | 109    | 108.4 | FLJ25715   | <a href="#">NM_182570.1</a> |          |            |                      |
| GI_32698973-S | 178.7 | 200.1  | 178.8 | MGC39821   | <a href="#">NM_182576.1</a> |          | phospholi  | lipid                |
| GI_32698975-S | 105.1 | 125.2  | 112.2 | FLJ30469   | <a href="#">NM_182573.1</a> |          |            |                      |
| GI_32698977-S | 102.9 | 107.4  | 87.3  | FLJ37964   | <a href="#">NM_182578.1</a> |          | catalytic  |                      |
| GI_32698979-S | 127.7 | 142.9  | 126.7 | MGC34799   | <a href="#">NM_182575.1</a> |          |            |                      |
| GI_32698981-S | 820.4 | 1050.6 | 891.1 | FLJ39035   | <a href="#">NM_182580.1</a> |          |            | integral to electron |
| GI_32698983-S | 291.4 | 361    | 364.2 | C19orf19   | <a href="#">NM_182577.1</a> | FLJ40059 |            |                      |
| GI_32698985-S | 133.5 | 158.7  | 136.6 | MGC34919   | <a href="#">NM_182582.1</a> |          |            |                      |
| GI_32698987-S | 124.2 | 140.7  | 130.9 | FLJ40343   | <a href="#">NM_182579.1</a> |          |            |                      |
| GI_32698989-S | 166.3 | 193.9  | 186.3 | FLJ33706   | <a href="#">NM_182584.1</a> |          |            |                      |
| GI_32698991-S | 223.2 | 300    | 252.7 | LOC284680  | <a href="#">NM_182581.1</a> |          |            |                      |
| GI_32698993-S | 95.4  | 95.1   | 93.7  | DKFZp451M2 | <a href="#">NM_182585.1</a> |          |            |                      |
| GI_32698995-S | 98.1  | 115.1  | 105.4 | FLJ38374   | <a href="#">NM_182583.1</a> |          |            |                      |
| GI_32698997-S | 132.2 | 143.3  | 128.7 | C2orf21    | <a href="#">NM_182587.1</a> | FLJ33496 |            |                      |
| GI_32699000-S | 94.7  | 94.1   | 83.2  | FLJ33651   | <a href="#">NM_182590.1</a> |          | DNA        | nucleus regulation   |
| GI_32699002-S | 97    | 116.9  | 101.3 | FLJ33534   | <a href="#">NM_182586.1</a> |          |            |                      |
| GI_32699004-S | 124.3 | 127.4  | 111.1 | FLJ39576   | <a href="#">NM_182592.1</a> |          |            |                      |
| GI_32699006-I | 260.4 | 317.6  | 292.4 | HTR3E      | <a href="#">NM_182589.1</a> | 5-HT3c1  |            |                      |
| GI_32699008-S | 373.1 | 433.9  | 398.3 | DKFZp564N2 | <a href="#">NM_182595.1</a> |          |            |                      |
| GI_32699010-S | 119   | 125.1  | 105.3 | FLJ37673   | <a href="#">NM_182591.1</a> |          |            |                      |
| GI_32699012-S | 96.9  | 112.8  | 101.7 | FLJ36980   | <a href="#">NM_182598.1</a> |          |            |                      |
| GI_32699014-S | 266.8 | 323.5  | 306   | ZNF454     | <a href="#">NM_182594.1</a> | FLJ37444 | nucleic    | nucleus regulation   |

|               |        |        |        |            |                             |                        |  |           |                          |
|---------------|--------|--------|--------|------------|-----------------------------|------------------------|--|-----------|--------------------------|
| GI_32699016-S | 122.8  | 114    | 121.5  | LOC286359  | <a href="#">NM_182600.1</a> |                        |  |           |                          |
| GI_32699018-S | 147.4  | 159.5  | 144.8  | FLJ39575   | <a href="#">NM_182597.1</a> |                        |  |           |                          |
| GI_32699020-S | 210.2  | 228.4  | 195.8  | FLJ36131   | <a href="#">NM_182604.1</a> |                        |  |           |                          |
| GI_32699022-S | 117.6  | 131.2  | 116.6  | FLJ37523   | <a href="#">NM_182599.1</a> |                        |  |           |                          |
| GI_32699025-S | 104.5  | 126.7  | 118.2  | FLJ37874   | <a href="#">NM_182603.1</a> |                        |  | calcium   |                          |
| GI_32699029-S | 139.6  | 145.3  | 136.3  | FLJ40448   | <a href="#">NM_182605.1</a> |                        |  |           |                          |
| GI_32699032-S | 118.9  | 104.7  | 97.4   | LOC339967  | <a href="#">NM_182606.1</a> |                        |  | trypsin   | proteolysis              |
| GI_32699037-S | 123.4  | 151.4  | 135.2  | SAMD7      | <a href="#">NM_182610.1</a> | DKFZp686E1583          |  |           |                          |
| GI_32699041-S | 99     | 107.7  | 100.1  | GPR144     | <a href="#">NM_182611.1</a> | PGR24                  |  | G-protein | integral to neuropepti   |
| GI_32699044-S | 1266.1 | 1512.9 | 1301.5 | FLJ34283   | <a href="#">NM_182612.1</a> |                        |  |           |                          |
| GI_32699049-S | 124.7  | 211.9  | 193.4  | MGC61550   | <a href="#">NM_182616.1</a> |                        |  |           |                          |
| GI_32699051-S | 90.3   | 122.2  | 92.5   | LOC348158  | <a href="#">NM_182617.1</a> |                        |  | ligase    | metabolis                |
| GI_32699053-S | 187.6  | 213.5  | 178.7  | FAM33A     | <a href="#">NM_182620.1</a> |                        |  |           |                          |
| GI_32699055-S | 112.5  | 118.4  | 116.7  | MGC52498   | <a href="#">NM_182621.1</a> |                        |  |           |                          |
| GI_32699057-S | 499.8  | 533.7  | 509.1  | FLJ36766   | <a href="#">NM_182623.1</a> |                        |  |           |                          |
| GI_32699059-S | 152.4  | 175.1  | 159.7  | FLJ40869   | <a href="#">NM_182625.1</a> |                        |  |           |                          |
| GI_32699061-S | 109.9  | 102.2  | 100.6  | FLJ25102   | <a href="#">NM_182626.1</a> |                        |  |           |                          |
| GI_32699063-S | 359.4  | 346.5  | 353.8  | MGC64882   | <a href="#">NM_182627.1</a> |                        |  |           |                          |
| GI_32699065-S | 87     | 94.5   | 87.2   | FLJ40083   | <a href="#">NM_182628.1</a> |                        |  | toxin     | extracellul pathogene    |
| GI_32699069-S | 93.5   | 106.8  | 100    | LOC348840  | <a href="#">NM_182631.1</a> |                        |  |           |                          |
| GI_32699071-S | 135.8  | 145    | 126.6  | FLJ31236   | <a href="#">NM_182632.1</a> |                        |  | neurotran | membran neurotran        |
| GI_32699073-S | 155.4  | 202.1  | 181.5  | FLJ36166   | <a href="#">NM_182634.1</a> |                        |  |           |                          |
| GI_32699075-S | 263.3  | 246.4  | 194.9  | LOC349236  | <a href="#">NM_182635.1</a> |                        |  |           |                          |
| GI_32699144-S | 97.8   | 93.8   | 94.5   | BAGE5      | <a href="#">NM_182484.1</a> |                        |  |           |                          |
| GI_32699146-S | 87.5   | 91.8   | 88.6   | BAGE4      | <a href="#">NM_181704.1</a> |                        |  |           |                          |
| GI_32699148-S | 127.2  | 115.6  | 124.6  | BAGE3      | <a href="#">NM_182481.1</a> |                        |  |           |                          |
| GI_32699150-S | 99.6   | 94.7   | 100.7  | BAGE2      | <a href="#">NM_182482.1</a> |                        |  |           |                          |
| GI_32813442-A | 515.1  | 643.2  | 577.7  | CTDSP1     | <a href="#">NM_182642.1</a> | SCP1;NLIIF             |  |           |                          |
| GI_32813444-S | 191.4  | 203.9  | 169.3  | HKR2       | <a href="#">NM_181846.1</a> | ZNF50                  |  | DNA       | nucleus regulation       |
| GI_32813446-S | 396.1  | 498.4  | 476.7  | DKFZp686P0 | <a href="#">NM_182588.1</a> |                        |  |           |                          |
| GI_32813448-S | 149.1  | 150.7  | 144.2  | FLJ25037   | <a href="#">NM_182596.1</a> |                        |  |           |                          |
| GI_32880194-S | 1162   | 2123.9 | 2654.5 | M-RIP      | <a href="#">NM_015134.1</a> | RHOIP3;KIAA0864        |  |           |                          |
| GI_32880198-S | 1037.4 | 944.3  | 782.8  | MKRN2      | <a href="#">NM_014160.3</a> | RNF62;HSPC070          |  | nucleic   | intracellula biological_ |
| GI_32880200-S | 112.7  | 117.8  | 102.4  | SDK1       | <a href="#">NM_152744.2</a> | FLJ31425               |  |           |                          |
| GI_32880202-A | 200.9  | 238.9  | 197.9  | CDH24      | <a href="#">NM_144985.2</a> | CDH11L;FLJ25193        |  | hydrogen- | membran homophili        |
| GI_32880205-I | 117.8  | 133    | 119.1  | CDH24      | <a href="#">NM_022478.2</a> | CDH11L;FLJ25193        |  | hydrogen- | membran homophili        |
| GI_32880207-S | 228.1  | 216.9  | 242    | DIAPH3     | <a href="#">NM_030932.2</a> | DRF3;DKFZP434C0931     |  | actin     | kinesin cytokinesi       |
| GI_32880228-S | 2051.6 | 2387   | 2387.5 | SELO       | <a href="#">NM_031454.1</a> | IMAGE3510317           |  |           |                          |
| GI_32895360-A | 98.1   | 107.9  | 99.3   | LIR9       | <a href="#">NM_181879.1</a> | CD85F;ILT11;LILRB7     |  |           |                          |
| GI_32895364-I | 114.3  | 117.6  | 111.1  | LIR9       | <a href="#">NM_181986.1</a> | CD85F;ILT11;LILRB7     |  |           |                          |
| GI_32895366-I | 97     | 96.9   | 92.7   | LIR9       | <a href="#">NM_021250.2</a> | CD85F;ILT11;LILRB7     |  |           |                          |
| GI_32895367-A | 297.9  | 245.9  | 157.4  | COL8A1     | <a href="#">NM_020351.2</a> | MGC9568                |  | collagen  | microfibril cell         |
| GI_32895369-I | 100.4  | 111.2  | 95     | COL8A1     | <a href="#">NM_001850.3</a> | MGC9568                |  | collagen  | microfibril cell         |
| GI_32964822-S | 195    | 222.2  | 205.3  | C20orf185  | <a href="#">NM_182658.1</a> | RYA3;LPLUNC3;dJ726C3.4 |  | lipid     |                          |

|               |        |        |        |          |                             |                                       |             |             |            |
|---------------|--------|--------|--------|----------|-----------------------------|---------------------------------------|-------------|-------------|------------|
| GI_32964824-S | 95.9   | 101.7  | 93.1   | C6orf206 | <a href="#">NM_152732.2</a> | FLJ30845;MRPS18AL1                    |             |             |            |
| GI_32964828-S | 77.4   | 101.2  | 90.9   | COL24A1  | <a href="#">NM_152890.4</a> |                                       | extracellul | collagen    | cell       |
| GI_32964829-S | 150.5  | 213.1  | 148.3  | COL8A2   | <a href="#">NM_005202.1</a> | FECD;PPCD;PPCD2;FLJ00201              | collagen    | basement    | vision     |
| GI_32964831-S | 172.7  | 215.6  | 205.9  | MGC42174 | <a href="#">NM_152383.2</a> |                                       |             |             |            |
| GI_32967253-I | 152.4  | 197.7  | 174.3  | NF2      | <a href="#">NM_181825.1</a> | ACN;SCH;BANF                          | tumor       | cytoskelet  | negative   |
| GI_32967275-A | 1241.9 | 1335.2 | 1537   | UBE2A    | <a href="#">NM_181762.1</a> | UBC2;HHR6A;RAD6A                      | ubiquitin   | nucleus     | postreplic |
| GI_32967277-I | 77.7   | 86.4   | 77.2   | UBE2A    | <a href="#">NM_181777.1</a> | UBC2;HHR6A;RAD6A                      | ubiquitin   | nucleus     | postreplic |
| GI_32967281-S | 198.8  | 210.2  | 191.9  | UBE2B    | <a href="#">NM_003337.2</a> | HR6B;UBC2;HHR6B;RAD6B;E2-17kDa        | ubiquitin   | nucleus     | postreplic |
| GI_32967282-I | 137.5  | 141.6  | 143.7  | UBE2C    | <a href="#">NM_181799.1</a> | UBCH10;dJ447F3.2                      | ubiquitin-  |             | cyclin     |
| GI_32967288-I | 117    | 134.8  | 128.8  | UBE2C    | <a href="#">NM_181802.1</a> | UBCH10;dJ447F3.2                      | ubiquitin-  |             | cyclin     |
| GI_32967290-A | 1450.8 | 1180.6 | 2430.8 | UBE2C    | <a href="#">NM_181803.1</a> | UBCH10;dJ447F3.2                      | ubiquitin-  |             | cyclin     |
| GI_32967293-I | 137.9  | 162.2  | 157.9  | C1QTNF6  | <a href="#">NM_031910.3</a> | CTRP6;ZACRP6                          |             | microfibril |            |
| GI_32967299-A | 323.7  | 1178.3 | 284.4  | C1QTNF6  | <a href="#">NM_182486.1</a> | CTRP6;ZACRP6                          |             | microfibril |            |
| GI_32967301-I | 122.1  | 145.7  | 131    | CERK     | <a href="#">NM_022766.4</a> | LK4;hCERK;FLJ21430;FLJ23239;KIAA1646; |             |             |            |
| GI_32967302-A | 1168.7 | 1363.8 | 1530   | CERK     | <a href="#">NM_182661.1</a> | LK4;hCERK;FLJ21430;FLJ23239;KIAA1646; |             |             |            |
| GI_32967304-I | 157.1  | 202.6  | 162.9  | COQ6     | <a href="#">NM_182476.1</a> | CGI-10                                | monoxyg     |             | ubiquinon  |
| GI_32967306-A | 546.4  | 715.4  | 570.5  | COQ6     | <a href="#">NM_182480.1</a> | CGI-10                                | monoxyg     |             | ubiquinon  |
| GI_32967306-I | 136.6  | 146.8  | 142    | COQ6     | <a href="#">NM_182480.1</a> | CGI-10                                | monoxyg     |             | ubiquinon  |
| GI_32967308-S | 112.1  | 102.1  | 103.6  | EPHA1    | <a href="#">NM_005232.2</a> | EPH;EPHT;EPHT1                        | transmem    | integral to | signal     |
| GI_32967310-S | 4477.5 | 3118.3 | 3302.1 | EPHA2    | <a href="#">NM_004431.2</a> | ECK                                   | transmem    | integral to | signal     |
| GI_32967312-I | 90.6   | 86.2   | 95.2   | EPHA3    | <a href="#">NM_005233.3</a> | ETK;HEK;ETK1;HEK4;TYRO4               | transmem    | integral to | signal     |
| GI_32967313-A | 120.5  | 128.3  | 122.1  | EPHA3    | <a href="#">NM_182644.1</a> | ETK;HEK;ETK1;HEK4;TYRO4               | transmem    | integral to | signal     |
| GI_32967313-I | 115.6  | 128.7  | 121.7  | EPHA3    | <a href="#">NM_182644.1</a> | ETK;HEK;ETK1;HEK4;TYRO4               | transmem    | integral to | signal     |
| GI_32967316-I | 168.4  | 217.1  | 173.6  | EPHA5    | <a href="#">NM_004439.3</a> | CEK7;EHK1;HEK7;TYRO4                  | transmem    | integral to | transmem   |
| GI_32967318-A | 100.1  | 94.7   | 88.7   | EPHA5    | <a href="#">NM_182472.1</a> | CEK7;EHK1;HEK7;TYRO4                  | transmem    | integral to | transmem   |
| GI_32967320-S | 206.9  | 245.3  | 213.8  | EPHA7    | <a href="#">NM_004440.2</a> | EHK3;HEK11                            | transmem    | integral to | transmem   |
| GI_32967513-A | 234.4  | 246    | 243.2  | NF2      | <a href="#">NM_181831.1</a> | ACN;SCH;BANF                          | tumor       | cytoskelet  | negative   |
| GI_32967585-A | 979.9  | 835    | 879.3  | PPP2R3A  | <a href="#">NM_181897.1</a> | PPP2R3                                | protein     |             |            |
| GI_32967585-I | 126.8  | 144    | 164.5  | PPP2R3A  | <a href="#">NM_181897.1</a> | PPP2R3                                | protein     |             |            |
| GI_32967587-I | 92     | 90.4   | 78.9   | PPP2R2C  | <a href="#">NM_020416.2</a> | PR52;IMYPNO;IMYPNO1;MGC33570          | protein     | protein     | signal     |
| GI_32967589-A | 117.3  | 127.9  | 117.6  | PDC      | <a href="#">NM_022576.2</a> | PHD;MEKA;PhLP;PhLOP                   | phospholi   | soluble     | phototrans |
| GI_32967590-I | 116.9  | 111.7  | 114    | PDC      | <a href="#">NM_002597.3</a> | PHD;MEKA;PhLP;PhLOP                   | phospholi   | soluble     | phototrans |
| GI_32967592-A | 136.7  | 149.2  | 147.1  | PPP2R2C  | <a href="#">NM_181876.1</a> | PR52;IMYPNO;IMYPNO1;MGC33570          | protein     | protein     | signal     |
| GI_32967592-I | 122    | 122.4  | 104.8  | PPP2R2C  | <a href="#">NM_181876.1</a> | PR52;IMYPNO;IMYPNO1;MGC33570          | protein     | protein     | signal     |
| GI_32967594-I | 1245.4 | 1244.4 | 1116.4 | PPP2R3A  | <a href="#">NM_002718.3</a> | PPP2R3                                | protein     |             |            |
| GI_32967595-I | 194.7  | 222.9  | 208.6  | PKLR     | <a href="#">NM_000298.3</a> | PK1;PKL;RPK                           | pyruvate    |             | glycolysis |
| GI_32967596-A | 101.1  | 108.9  | 106.6  | PKLR     | <a href="#">NM_181871.1</a> | PK1;PKL;RPK                           | pyruvate    |             | glycolysis |
| GI_32967596-I | 118.6  | 117.9  | 101.6  | PKLR     | <a href="#">NM_181871.1</a> | PK1;PKL;RPK                           | pyruvate    |             | glycolysis |
| GI_32967598-A | 117    | 125.7  | 105.7  | ANK3     | <a href="#">NM_001149.2</a> |                                       | structural  | Golgi       | cytoskelet |
| GI_32967598-I | 106.7  | 117.8  | 79.6   | ANK3     | <a href="#">NM_001149.2</a> |                                       | structural  | Golgi       | cytoskelet |
| GI_32967600-I | 95.7   | 96.5   | 98.9   | ANK3     | <a href="#">NM_020987.2</a> |                                       | structural  | Golgi       | cytoskelet |
| GI_32967602-I | 132.6  | 140.3  | 139.9  | BAZ1A    | <a href="#">NM_013448.2</a> | ACF1;WALp1;hACF1;WCRF180;DKFZP586     | DNA         | kinesin     | regulation |
| GI_32967604-A | 662    | 677.1  | 532.1  | BAZ1A    | <a href="#">NM_182648.1</a> | ACF1;WALp1;hACF1;WCRF180;DKFZP586     | DNA         | kinesin     | regulation |
| GI_32967606-S | 108.9  | 111.5  | 107.2  | GPX2     | <a href="#">NM_002083.2</a> | GSPHX-GI                              | glutathion  | cytoplasm   | peroxidas  |

|               |        |        |        |            |                             |                                    |             |             |              |
|---------------|--------|--------|--------|------------|-----------------------------|------------------------------------|-------------|-------------|--------------|
| GI_32967608-S | 321.8  | 451.2  | 355.7  | SLC13A1    | <a href="#">NM_022444.3</a> | NAS1;NaSi-1                        | transporte  | integral to | sulfate      |
| GI_32996732-A | 149.3  | 154.6  | 135.5  | RASSF5     | <a href="#">NM_182664.1</a> | RAPL;Maxp1;NORE1;RASSF3;MGC10823   |             |             |              |
| GI_32996734-I | 125.7  | 115.6  | 122.6  | RASSF5     | <a href="#">NM_182665.1</a> | RAPL;Maxp1;NORE1;RASSF3;MGC10823   |             |             |              |
| GI_32996736-S | 201.3  | 196.7  | 162.3  | TGS        | <a href="#">NM_173083.2</a> |                                    |             |             |              |
| GI_33086946-S | 768.4  | 853.7  | 955.3  | MGC20481   | <a href="#">NM_052849.2</a> |                                    |             |             |              |
| GI_33147079-S | 946.5  | 658.4  | 649    | AMSH-LP    | <a href="#">NM_020799.1</a> | AMSH-FP;KIAA1373                   |             |             |              |
| GI_33147083-S | 367.1  | 333.5  | 341.2  | CDAN1      | <a href="#">NM_138477.1</a> | CDA1;CDAI;CDA-I;codanin            |             |             |              |
| GI_33149302-I | 186    | 207.4  | 180.9  | UPK3B      | <a href="#">NM_030570.2</a> | P35;UPIIIb;FLJ32198;MGC10902       |             | endoplas    |              |
| GI_33149303-A | 117.4  | 106.4  | 113.2  | UPK3B      | <a href="#">NM_182683.1</a> | P35;UPIIIb;FLJ32198;MGC10902       |             | endoplas    |              |
| GI_33149305-I | 101.6  | 106    | 103.8  | UPK3B      | <a href="#">NM_182684.1</a> | P35;UPIIIb;FLJ32198;MGC10902       |             | endoplas    |              |
| GI_33149307-S | 153    | 160.4  | 148.8  | UBE2D1     | <a href="#">NM_003338.3</a> | SFT;UBCH5;UBC4/5;UBCH5A;E2(17)KB1  | ubiquitin   |             | ubiquitin-   |
| GI_33149315-I | 93     | 95.8   | 107.1  | UBE2D3     | <a href="#">NM_181889.1</a> | UBC4/5;UBCH5C;MGC5416;MGC43926;E2( | ubiquitin   |             | ubiquitin-   |
| GI_33149321-I | 143.9  | 179.2  | 139.5  | UBE2D3     | <a href="#">NM_181892.1</a> | UBC4/5;UBCH5C;MGC5416;MGC43926;E2( | ubiquitin   |             | ubiquitin-   |
| GI_33149323-A | 4992.7 | 4614.3 | 4396.2 | UBE2D3     | <a href="#">NM_181893.1</a> | UBC4/5;UBCH5C;MGC5416;MGC43926;E2( | ubiquitin   |             | ubiquitin-   |
| GI_33149325-S | 104.3  | 108.5  | 99.3   | AVPR1A     | <a href="#">NM_000706.3</a> | AVPR1                              | vasopress   | endosome    | cytosolic    |
| GI_33149330-S | 254.7  | 520.6  | 168.8  | NXN        | <a href="#">NM_022463.3</a> | FLJ12614                           |             |             |              |
| GI_33186853-S | 349.8  | 271.1  | 433.4  | TOM1L2     | <a href="#">NM_144678.2</a> | FLJ32746                           | DNA         | Golgi       | intra-Golgi  |
| GI_33186855-S | 98.2   | 112.9  | 112.9  | GCET2      | <a href="#">NM_152785.2</a> | HGAL;GCAT2;MGC40441                |             |             |              |
| GI_33186881-S | 134.5  | 153.1  | 141.6  | TESSP2     | <a href="#">NM_182702.1</a> |                                    | trypsin     |             | proteolysis  |
| GI_33186883-S | 79.1   | 91.8   | 97.3   | DDX53      | <a href="#">NM_182699.1</a> | CAGE                               | nucleic     |             |              |
| GI_33186894-S | 127.5  | 132.2  | 128    | SELV       | <a href="#">NM_182704.1</a> |                                    |             |             |              |
| GI_33186900-S | 722.6  | 799.9  | 773.7  | MGC45871   | <a href="#">NM_182705.1</a> |                                    |             |             |              |
| GI_33186904-S | 387.3  | 477.6  | 448.5  | MPRP-1     | <a href="#">NM_145243.2</a> |                                    | metallope   | membran     | proteolysis  |
| GI_33186909-A | 1531.2 | 1237.4 | 1257.7 | SCRIB      | <a href="#">NM_182706.1</a> | CRIB1;SCRB1;SCRIB1;Vartul;KIAA0147 | protein     |             | intracellula |
| GI_33186909-I | 121.2  | 133.5  | 119.8  | SCRIB      | <a href="#">NM_182706.1</a> | CRIB1;SCRB1;SCRIB1;Vartul;KIAA0147 | protein     |             | intracellula |
| GI_33186919-S | 112.8  | 135.4  | 132.9  | DKFZp761B1 | <a href="#">NM_173463.2</a> |                                    |             |             |              |
| GI_33186924-S | 219.2  | 253.1  | 227    | PRKAG2     | <a href="#">NM_016203.2</a> | AAKG;WPWS;AAKG2;H91620P            | molecular   | cellular_co | cholestero   |
| GI_33186926-A | 616.6  | 564.9  | 413.8  | C3orf6     | <a href="#">NM_174908.2</a> |                                    |             |             |              |
| GI_33187364-S | 549.9  | 513.8  | 557.8  | EIF5A2     | <a href="#">NM_020390.5</a> | EIF-5A2;eIF5AII                    | translation |             | translation  |
| GI_33188426-I | 96.6   | 110.1  | 109.3  | UTY        | <a href="#">NM_182659.1</a> | UTY1                               |             | nucleus     |              |
| GI_33188428-A | 108.8  | 121.3  | 113.3  | UTY        | <a href="#">NM_182660.1</a> | UTY1                               |             | nucleus     |              |
| GI_33188428-I | 129.9  | 161.8  | 143.4  | UTY        | <a href="#">NM_182660.1</a> | UTY1                               |             | nucleus     |              |
| GI_33188430-I | 233.4  | 251.5  | 229    | UTY        | <a href="#">NM_007125.3</a> | UTY1                               |             | nucleus     |              |
| GI_33188434-A | 246.9  | 287.5  | 254.3  | DLC1       | <a href="#">NM_024767.2</a> | HP;ARHGAP7;STARD12;FLJ21120;p122-  | GTPase      | cytoplasm   | signal       |
| GI_33188434-I | 127.2  | 123.7  | 124.9  | DLC1       | <a href="#">NM_024767.2</a> | HP;ARHGAP7;STARD12;FLJ21120;p122-  | GTPase      | cytoplasm   | signal       |
| GI_33188436-I | 120.3  | 120.9  | 106.4  | DLC1       | <a href="#">NM_006094.3</a> | HP;ARHGAP7;STARD12;FLJ21120;p122-  | GTPase      | cytoplasm   | signal       |
| GI_33188438-I | 112.3  | 106.4  | 106.2  | CPEB2      | <a href="#">NM_182485.1</a> |                                    |             |             |              |
| GI_33188442-I | 101.2  | 106.4  | 92.5   | MACF1      | <a href="#">NM_033044.2</a> | ACF7;MACF;ABP620;KIAA0465;KIAA1251 |             |             |              |
| GI_33188444-A | 2635.3 | 2260.5 | 1546.4 | MACF1      | <a href="#">NM_012090.3</a> | ACF7;MACF;ABP620;KIAA0465;KIAA1251 |             |             |              |
| GI_33188444-I | 127.3  | 145.3  | 132.8  | MACF1      | <a href="#">NM_012090.3</a> | ACF7;MACF;ABP620;KIAA0465;KIAA1251 |             |             |              |
| GI_33188446-I | 157.3  | 166.3  | 250.4  | SRPK2      | <a href="#">NM_182691.1</a> | SFRSK2                             | protein     | nucleus     | RNA          |
| GI_33188448-I | 107.1  | 117.9  | 106.5  | SRPK2      | <a href="#">NM_182692.1</a> | SFRSK2                             | protein     | nucleus     | RNA          |
| GI_33188453-A | 520.3  | 959.8  | 720.2  | PRDX2      | <a href="#">NM_181738.1</a> | PRP;TSA;NKEFB;PRXII;TDPX1;MGC4104  | thioredoxi  | cytoplasm   | killer       |
| GI_33188453-I | 95.2   | 105.6  | 94.7   | PRDX2      | <a href="#">NM_181738.1</a> | PRP;TSA;NKEFB;PRXII;TDPX1;MGC4104  | thioredoxi  | cytoplasm   | killer       |

|               |        |        |        |          |                             |                                    |              |             |             |
|---------------|--------|--------|--------|----------|-----------------------------|------------------------------------|--------------|-------------|-------------|
| GI_33188455-I | 117.5  | 125.2  | 118.8  | UBE2D2   | <a href="#">NM_181838.1</a> | UBC4;PUBC1;UBC4/5;UBCH5B;E2(17)KB2 | ubiquitin    |             | ubiquitin-  |
| GI_33188457-A | 502.3  | 491.3  | 465.9  | UBE2D2   | <a href="#">NM_003339.2</a> | UBC4;PUBC1;UBC4/5;UBCH5B;E2(17)KB2 | ubiquitin    |             | ubiquitin-  |
| GI_33188458-S | 305.9  | 284.6  | 297.2  | BRAF     | <a href="#">NM_004333.2</a> | BRAF1;RAFB1                        | protein      |             | anti-       |
| GI_33188460-S | 193.5  | 203.3  | 199.2  | GATA4    | <a href="#">NM_002052.2</a> |                                    | transcripti  | nucleus     | transcripti |
| GI_33188462-S | 823.3  | 815.1  | 599    | MRPS9    | <a href="#">NM_182640.1</a> | RPMS9                              |              |             |             |
| GI_33188464-S | 95.8   | 109.6  | 102.1  | VIPR2    | <a href="#">NM_003382.3</a> |                                    | G-protein    | integral to | signal      |
| GI_33238871-S | 444.8  | 519.9  | 453.1  | RECQL5   | <a href="#">NM_004259.3</a> | RECQ5                              | DNA          |             | DNA         |
| GI_33239373-S | 424.2  | 425    | 298.1  | MGC3794  | <a href="#">NM_152902.2</a> | dJ69E11.3                          |              |             |             |
| GI_33239438-S | 365.8  | 374.5  | 346.1  | SLC25A17 | <a href="#">NM_006358.2</a> | PMP34                              | carrier      | peroxisom   | small       |
| GI_33239439-S | 102.6  | 97     | 116.9  | ZFY      | <a href="#">NM_003411.2</a> |                                    | DNA          | nucleus     | regulation  |
| GI_33239441-I | 78.4   | 96.7   | 87     | SYPL     | <a href="#">NM_006754.2</a> | H-SP1                              | transporte   | synaptic    | nonselecti  |
| GI_33239442-A | 459.8  | 456.2  | 461.7  | SYPL     | <a href="#">NM_182715.1</a> | H-SP1                              | transporte   | synaptic    | nonselecti  |
| GI_33239442-I | 432.1  | 547.5  | 476.5  | SYPL     | <a href="#">NM_182715.1</a> | H-SP1                              | transporte   | synaptic    | nonselecti  |
| GI_33239444-I | 138.4  | 193.8  | 144.3  | EIF3S9   | <a href="#">NM_003751.2</a> | PRT1;EIF3-ETA;EIF3-P110;EIF3-P116  | translation  | eukaryotic  | translation |
| GI_33239446-A | 2631.6 | 2949.7 | 2540.9 | EIF3S9   | <a href="#">NM_182712.1</a> | PRT1;EIF3-ETA;EIF3-P110;EIF3-P116  | translation  | eukaryotic  | translation |
| GI_33239448-S | 108.5  | 143.4  | 132.7  | CYP26B1  | <a href="#">NM_019885.2</a> | CYP26A2;P450RAI-2                  | monooxyg     | membran     | electron    |
| GI_33239449-I | 114.8  | 128.9  | 116.7  | PCNA     | <a href="#">NM_002592.2</a> | MGC8367                            | proliferatin | delta-DNA   | DNA         |
| GI_33239450-A | 1685.8 | 2595.3 | 1523.8 | PCNA     | <a href="#">NM_182649.1</a> | MGC8367                            | proliferatin | delta-DNA   | DNA         |
| GI_33239450-I | 1182.8 | 1885.7 | 1030.3 | PCNA     | <a href="#">NM_182649.1</a> | MGC8367                            | proliferatin | delta-DNA   | DNA         |
| GI_33285003-S | 896.8  | 945.2  | 818    | ZNF574   | <a href="#">NM_022752.2</a> | FLJ22059                           |              |             |             |
| GI_33285005-S | 457    | 432    | 470.9  | C9orf9   | <a href="#">NM_018956.3</a> |                                    | DNA          | nucleus     | regulation  |
| GI_33285007-S | 224.8  | 254.7  | 215.9  | GYLTL1B  | <a href="#">NM_152312.2</a> | FLJ35207                           |              |             |             |
| GI_33285009-S | 204.4  | 241.7  | 205.3  | FLJ22390 | <a href="#">NM_022746.2</a> |                                    |              |             |             |
| GI_33285012-S | 310.2  | 417    | 277.6  | FLJ12800 | <a href="#">NM_022903.2</a> | FLJ13629                           | DNA          | nucleus     | regulation  |
| GI_33285014-S | 271    | 257.2  | 241.4  | MGC24976 | <a href="#">NM_144598.2</a> |                                    |              |             |             |
| GI_33286413-A | 146    | 173.5  | 185.9  | HPS1     | <a href="#">NM_182639.1</a> | HPS;MGC5277                        |              | lysosome    | lysosome    |
| GI_33286413-I | 400.7  | 440.9  | 541.6  | HPS1     | <a href="#">NM_182639.1</a> | HPS;MGC5277                        |              | lysosome    | lysosome    |
| GI_33286417-A | 6503.9 | 9420   | 8758.1 | PKM2     | <a href="#">NM_002654.3</a> | PK3;PKM;TCB;OIP3;CTHBP;THBP1;MGC39 |              |             |             |
| GI_33286417-I | 1189.7 | 2092.3 | 2065.5 | PKM2     | <a href="#">NM_002654.3</a> | PK3;PKM;TCB;OIP3;CTHBP;THBP1;MGC39 |              |             |             |
| GI_33286419-I | 118.3  | 140.5  | 123.6  | PKM2     | <a href="#">NM_182470.1</a> | PK3;PKM;TCB;OIP3;CTHBP;THBP1;MGC39 |              |             |             |
| GI_33286423-I | 157.5  | 194.6  | 172.2  | OPRL1    | <a href="#">NM_182647.1</a> | OOR;ORL1;KOR-3;NOCIR;MGC34578      | G-protein    | integral to | G-protein   |
| GI_33286425-A | 216.2  | 185.4  | 174.6  | OPRL1    | <a href="#">NM_000913.3</a> | OOR;ORL1;KOR-3;NOCIR;MGC34578      | G-protein    | integral to | G-protein   |
| GI_33286426-S | 107    | 98.2   | 96.3   | SLC6A4   | <a href="#">NM_001045.2</a> | SERT;5-HTT                         | serotonin    | integral to | serotonin   |
| GI_33286427-I | 156.1  | 180.5  | 180.2  | SLC7A8   | <a href="#">NM_012244.2</a> | LAT2;LPI-PC1                       | neutral      | integral to | small       |
| GI_33286429-A | 133.6  | 170.4  | 136.6  | SLC7A8   | <a href="#">NM_182728.1</a> | LAT2;LPI-PC1                       | neutral      | integral to | small       |
| GI_33286429-I | 142.6  | 177.8  | 161.1  | SLC7A8   | <a href="#">NM_182728.1</a> | LAT2;LPI-PC1                       | neutral      | integral to | small       |
| GI_33286433-A | 796.5  | 901.6  | 708.2  | NSFL1C   | <a href="#">NM_182483.1</a> | p47;MGC3347;dJ776F14.1             |              |             |             |
| GI_33286435-I | 150.7  | 161.6  | 139.4  | GGN      | <a href="#">NM_152657.3</a> | FLJ35713;MGC33369                  |              |             |             |
| GI_33286437-A | 161.8  | 190.2  | 185.1  | GGN      | <a href="#">NM_182477.1</a> | FLJ35713;MGC33369                  |              |             |             |
| GI_33286441-S | 306.7  | 377.2  | 326.7  | FLJ11362 | <a href="#">NM_021946.2</a> |                                    |              |             |             |
| GI_33286443-S | 151.8  | 161.9  | 121.7  | MAML2    | <a href="#">NM_032427.1</a> | MAM2;MAM3;MAM-3;MAML3;KIAA1819     |              |             |             |
| GI_33286445-S | 721    | 759.6  | 804.4  | OGFR     | <a href="#">NM_007346.2</a> |                                    | opioid       | membran     | cell growth |
| GI_33286447-S | 475.1  | 796.5  | 611.4  | PKD2     | <a href="#">NM_000297.2</a> | PKD4;APKD2                         | cytoskelet   | voltage-    | cation      |
| GI_33300634-S | 1303.7 | 1252.5 | 1444.2 | ZFPL1    | <a href="#">NM_006782.2</a> | MCG4;D11S750                       |              |             |             |

|               |         |       |       |            |                             |                           |             |              |             |
|---------------|---------|-------|-------|------------|-----------------------------|---------------------------|-------------|--------------|-------------|
| GI_33300636-S | 781.5   | 776.3 | 625.6 | FLJ10036   | <a href="#">NM_017975.2</a> |                           |             |              |             |
| GI_33300638-S | 296.7   | 292.3 | 315.3 | DKFZp547E0 | <a href="#">NM_032276.2</a> |                           |             |              |             |
| GI_33300644-S | 214.2   | 268.9 | 219.1 | LOC157740  | <a href="#">NM_182753.1</a> |                           |             |              |             |
| GI_33300646-S | 126.5   | 134.4 | 138.2 | C8orf5     | <a href="#">NM_182754.1</a> |                           |             |              |             |
| GI_33300648-S | 130.2   | 155.9 | 138.3 | LOC284467  | <a href="#">NM_182759.1</a> |                           |             |              |             |
| GI_33300650-S | 278.4   | 251.8 | 258.8 | LOC220929  | <a href="#">NM_182755.1</a> |                           |             |              |             |
| GI_33300652-S | 123.2   | 129.7 | 131.3 | SPY1       | <a href="#">NM_182756.1</a> |                           |             |              |             |
| GI_33300654-S | 91      | 102.2 | 77.8  | LOC340069  | <a href="#">NM_182761.1</a> |                           |             |              |             |
| GI_33300656-S | 244.7   | 223.7 | 161.7 | FLJ38736   | <a href="#">NM_182758.1</a> |                           |             |              |             |
| GI_33300660-S | 107.2   | 117.6 | 120.4 | 7A5        | <a href="#">NM_182762.1</a> |                           |             |              |             |
| GI_33300662-S | 199     | 239.5 | 227.5 | MGC16202   | <a href="#">NM_032373.2</a> |                           |             |              |             |
| GI_33300664-I | 274.5   | 331.2 | 300.1 | MUC1       | <a href="#">NM_182741.1</a> | EMA;PEM;PUM;CD227         | actin       | cytoskelet   |             |
| GI_33300667-S | 87.1    | 93.4  | 80.6  | PMS2L2     | <a href="#">NM_002679.1</a> | PMS4                      |             |              |             |
| GI_33300669-I | 484.4   | 383.1 | 392.2 | MGC15416   | <a href="#">NM_138418.2</a> |                           |             |              |             |
| GI_33342275-S | 109.6   | 118.8 | 105.3 | FLJ22761   | <a href="#">NM_025130.2</a> |                           |             |              |             |
| GI_33342277-S | 325.6   | 331   | 289.8 | PP2447     | <a href="#">NM_025204.2</a> |                           |             |              |             |
| GI_33342279-I | 139.5   | 126.3 | 107.2 | FLJ37306   | <a href="#">NM_182765.1</a> | DKFZp761D0614             | ubiquitin-  | intracellula | ubiquitin   |
| GI_33350927-S | 112.8   | 113.7 | 120.3 | DAB1       | <a href="#">NM_021080.3</a> |                           |             |              | developm    |
| GI_33350929-S | 116     | 114.5 | 97.9  | C6orf107   | <a href="#">NM_017754.2</a> | FLJ20302;dJ349A12.1       | NADH        | NADH         | mitochond   |
| GI_33350931-S | 10995.1 | 10112 | 9185  | DNCH1      | <a href="#">NM_001376.2</a> | p22;DHC1;DNCL;DYHC;HL-    | adenosine   | cytoplasm    | mitosis     |
| GI_33354243-A | 171.5   | 179.5 | 230.4 | NELF       | <a href="#">NM_182780.1</a> |                           |             |              |             |
| GI_33354243-I | 114.6   | 108   | 98.8  | NELF       | <a href="#">NM_182780.1</a> |                           |             |              |             |
| GI_33354248-S | 91.1    | 101.7 | 96.1  | DNAJA4     | <a href="#">NM_018602.2</a> | PRO1472                   | chaperone   |              | protein     |
| GI_33354256-S | 191.7   | 261.4 | 216.7 | GPR83      | <a href="#">NM_016540.2</a> | GIR;GPR72                 | G-protein   | integral to  | G-protein   |
| GI_33354272-S | 97.9    | 89.3  | 87.6  | ZIM2       | <a href="#">NM_015363.3</a> |                           | zinc ion    | nucleus      | regulation  |
| GI_33354274-S | 126.4   | 104.2 | 91.7  | FLJ10521   | <a href="#">NM_018125.2</a> |                           |             |              |             |
| GI_33354278-S | 94.9    | 93.9  | 87.5  | LSR7       | <a href="#">NM_018559.2</a> | AD029;KIAA1704            |             |              |             |
| GI_33354280-A | 306.6   | 269.9 | 271.3 | SLC6A15    | <a href="#">NM_182767.1</a> | V7-3;NTT73;hv7-3;FLJ10316 |             |              |             |
| GI_33354280-I | 313.6   | 191.6 | 228.2 | SLC6A15    | <a href="#">NM_182767.1</a> | V7-3;NTT73;hv7-3;FLJ10316 |             |              |             |
| GI_33354282-S | 207.5   | 195.5 | 172.7 | DET1       | <a href="#">NM_017996.2</a> | FLJ10103                  |             |              |             |
| GI_33354284-S | 232.6   | 300.7 | 268.8 | PEG3       | <a href="#">NM_006210.1</a> | PW1;KIAA0287              | signal      | nucleus      | regulation  |
| GI_33356127-I | 189.8   | 186.2 | 193.6 | FLJ22054   | <a href="#">NM_024561.3</a> | PRO2435;MGC40612          |             |              |             |
| GI_33356129-A | 119.6   | 132.1 | 138.1 | FLJ22054   | <a href="#">NM_018527.2</a> | PRO2435;MGC40612          |             |              |             |
| GI_33356129-I | 117.3   | 112.6 | 128.6 | FLJ22054   | <a href="#">NM_018527.2</a> | PRO2435;MGC40612          |             |              |             |
| GI_33356133-S | 117.4   | 115.7 | 108.8 | FLJ25770   | <a href="#">NM_178555.2</a> | MGC35086                  |             |              |             |
| GI_33356135-S | 359.6   | 377.3 | 339.8 | FLJ31340   | <a href="#">NM_152748.2</a> |                           |             |              |             |
| GI_33356137-A | 89.2    | 97.7  | 89.9  | FLJ32940   | <a href="#">NM_182766.1</a> | FLJ25438                  |             |              |             |
| GI_33356141-S | 448.6   | 321.8 | 286.5 | C9orf91    | <a href="#">NM_153045.2</a> | FLJ38045;DKFZp547P234     | binding     | mitochond    | transport   |
| GI_33356147-S | 446.3   | 364.5 | 349.8 | FMNL1      | <a href="#">NM_005892.3</a> | FMNL1;FHOD4;KW-           |             |              |             |
| GI_33356153-A | 854.4   | 890   | 639.8 | UBE2H      | <a href="#">NM_182697.1</a> | UBC8;UBCH1;UBCH2;E2-20K   | ubiquitin   |              | ubiquitin-  |
| GI_33356156-S | 149.6   | 210.4 | 185.9 | ARP10      | <a href="#">NM_181773.2</a> |                           |             |              |             |
| GI_33356159-S | 78.4    | 78.1  | 84.1  | CCKBR      | <a href="#">NM_176875.2</a> | GASR                      | cholecysto  | integral to  | phosphati   |
| GI_33356162-S | 918.6   | 991.9 | 967.2 | EIF1AY     | <a href="#">NM_004681.2</a> |                           | translation |              | translation |
| GI_33356164-S | 133.5   | 182.2 | 146.3 | HOOK3      | <a href="#">NM_032410.2</a> | HK3                       | microtubul  | Golgi        | Golgi       |

|               |        |        |        |           |                             |                                     |             |              |             |
|---------------|--------|--------|--------|-----------|-----------------------------|-------------------------------------|-------------|--------------|-------------|
| GI_33356165-S | 779.6  | 831.8  | 637.4  | KIAA1002  | <a href="#">NM_014925.2</a> | PR01365                             |             |              |             |
| GI_33356169-S | 272.6  | 301.3  | 309.6  | MYO9B     | <a href="#">NM_004145.2</a> | MYR5                                | myosin      | perinuclea   | neuropepti  |
| GI_33356171-S | 829.6  | 679.5  | 804.5  | NBS1      | <a href="#">NM_002485.3</a> | ATV;NBS;AT-V1;AT-V2;NIBRIN          | DNA         | nucleus      | cell cycle  |
| GI_33356173-S | 187.2  | 219.7  | 176.1  | PNN       | <a href="#">NM_002687.2</a> | DRS;SDK3                            | structural  | intermedia   | cell        |
| GI_33356175-S | 522.5  | 725.5  | 590.3  | SATB1     | <a href="#">NM_002971.2</a> |                                     | double-     | nucleus      | establish   |
| GI_33356176-S | 1580   | 1923.6 | 1881.5 | PTPN11    | <a href="#">NM_002834.3</a> | CFC;NS1;SHP2;BPTP3;PTP2C;PTP-       | non-        |              | signal      |
| GI_33356178-S | 400.3  | 471.4  | 441.2  | TTF1      | <a href="#">NM_007344.2</a> |                                     | transcripti | nucleus      | transcripti |
| GI_33356540-A | 265.7  | 359.8  | 317.4  | PLTP      | <a href="#">NM_182676.1</a> |                                     | lipid       | extracellul  | lipid       |
| GI_33356542-I | 249.9  | 300.1  | 289.8  | PLTP      | <a href="#">NM_006227.2</a> |                                     | lipid       | extracellul  | lipid       |
| GI_33356543-I | 155.5  | 165.5  | 165.6  | PLCB1     | <a href="#">NM_182734.1</a> | PLC-I;PI-PLC;PLC-154                | phosphoin   | cytoplasm    | signal      |
| GI_33356545-A | 184.3  | 136.4  | 158.3  | PLCB1     | <a href="#">NM_015192.2</a> | PLC-I;PI-PLC;PLC-154                | phosphoin   | cytoplasm    | signal      |
| GI_33356546-S | 6764.3 | 4981.5 | 6647.1 | MCM2      | <a href="#">NM_004526.2</a> | BM28;CCNL1;CDCL1;D3S3194;KIAA0030;M | adenosine   | chromatin    | cell cycle  |
| GI_33356548-S | 3664.5 | 3519.7 | 4166.9 | MCM3      | <a href="#">NM_002388.3</a> | HCC5;P1.h;RLFB;MGC1157;P1-MCM3      | adenosine   | alpha        | DNA         |
| GI_33356553-I | 129.5  | 143.2  | 131.8  | FLJ20249  | <a href="#">NM_017725.1</a> | DKFZP434F1735                       | nucleic     | intracellula |             |
| GI_33356557-A | 176.1  | 186.7  | 171.4  | AMELX     | <a href="#">NM_182681.1</a> | AMG;AIH1;ALGN;AMGL;AMGX             | extracellul | extracellul  | ossificatio |
| GI_33356559-S | 305    | 358.9  | 348.9  | JARID1D   | <a href="#">NM_004653.2</a> | HY;HYA;SMCY;KIAA0234                | DNA         | nucleus      | regulation  |
| GI_33356561-S | 149.1  | 113.8  | 286.7  | VENTX2    | <a href="#">NM_014468.2</a> | NA88A;HPX42B                        | transcripti | nucleus      | regulation  |
| GI_33359209-S | 98     | 104.4  | 91.9   | PKD1L1    | <a href="#">NM_138295.2</a> |                                     |             | integral to  |             |
| GI_33359210-I | 375    | 457.3  | 444.4  | FLJ36525  | <a href="#">NM_182774.1</a> | DKFZp686I0110                       |             |              |             |
| GI_33359212-S | 213    | 250.6  | 249.1  | PKD1      | <a href="#">NM_000296.2</a> | PBP                                 |             | integral to  | calcium-    |
| GI_33359216-I | 101.4  | 104    | 103.5  | FLJ36525  | <a href="#">NM_182775.1</a> | DKFZp686I0110                       |             |              |             |
| GI_33359218-I | 132.3  | 141.8  | 128.8  | PKD1-like | <a href="#">NM_182686.1</a> | PP791;KIAA1837                      |             |              |             |
| GI_33359220-A | 413    | 535.5  | 597.7  | PKD1-like | <a href="#">NM_024874.3</a> | PP791;KIAA1837                      |             |              |             |
| GI_33359220-I | 853    | 1082   | 1033.8 | PKD1-like | <a href="#">NM_024874.3</a> | PP791;KIAA1837                      |             |              |             |
| GI_33359222-S | 123.4  | 129.2  | 121.8  | ZFD25     | <a href="#">NM_016220.2</a> |                                     | DNA         | nucleus      | regulation  |
| GI_33359679-A | 168.7  | 328.3  | 238.5  | EFNA1     | <a href="#">NM_182685.1</a> | B61;EFL1;ECKLG;EPLG1;LERK1;TNFAIP4  | transmem    | membran      | cell-cell   |
| GI_33359681-I | 138.2  | 194    | 160.8  | EFNA1     | <a href="#">NM_004428.2</a> | B61;EFL1;ECKLG;EPLG1;LERK1;TNFAIP4  | transmem    | membran      | cell-cell   |
| GI_33359683-S | 375    | 454.6  | 390.8  | EFNA3     | <a href="#">NM_004952.3</a> | EFL2;EPLG3;LERK3                    | transmem    | membran      | cell-cell   |
| GI_33359684-I | 347.4  | 405.4  | 360.5  | EFNA4     | <a href="#">NM_005227.2</a> | EFL4;EPLG4;LERK4                    | transmem    | membran      | cell-cell   |
| GI_33359685-A | 213.3  | 322.2  | 276.3  | EFNA4     | <a href="#">NM_182689.1</a> | EFL4;EPLG4;LERK4                    | transmem    | membran      | cell-cell   |
| GI_33359689-S | 1975.1 | 1482.4 | 2157.9 | EFNB2     | <a href="#">NM_004093.2</a> | HTKL;EPLG5;Htk-L;LERK5              | transmem    | integral to  | histogene   |
| GI_33359690-A | 463    | 498.3  | 357.8  | UBE2E1    | <a href="#">NM_182666.1</a> | UBCH6                               | ubiquitin   |              | ubiquitin-  |
| GI_33359693-A | 2349.5 | 3079.3 | 2884.6 | UBE2E3    | <a href="#">NM_182678.1</a> | UBCH9;UbcM2                         | ubiquitin   |              | ubiquitin-  |
| GI_33359693-I | 90.8   | 100.3  | 85.6   | UBE2E3    | <a href="#">NM_182678.1</a> | UBCH9;UbcM2                         | ubiquitin   |              | ubiquitin-  |
| GI_33359696-A | 287.7  | 322.2  | 218.7  | UBE2G1    | <a href="#">NM_182682.1</a> | UBC7;E217K;UBE2G                    | ubiquitin   |              | ubiquitin-  |
| GI_33359698-I | 622    | 803.9  | 706.9  | UBE2G1    | <a href="#">NM_003342.3</a> | UBC7;E217K;UBE2G                    | ubiquitin   |              | ubiquitin-  |
| GI_33359699-A | 955.1  | 866.3  | 612.5  | UBE2G2    | <a href="#">NM_003343.4</a> | UBC7                                | ubiquitin   |              | ubiquitin-  |
| GI_33359700-I | 129.4  | 136.5  | 146.6  | UBE2G2    | <a href="#">NM_182688.1</a> | UBC7                                | ubiquitin   |              | ubiquitin-  |
| GI_33383230-A | 1271.7 | 1356.5 | 1007   | ARS2      | <a href="#">NM_015908.3</a> | ASR2                                | molecular   | cellular_co  | response    |
| GI_33383232-I | 94.2   | 94.7   | 92.2   | ARS2      | <a href="#">NM_182800.1</a> | ASR2                                | molecular   | cellular_co  | response    |
| GI_33383234-A | 328.8  | 318.7  | 380.8  | MCM10     | <a href="#">NM_018518.3</a> | PRO2249                             |             |              |             |
| GI_33383240-A | 180.4  | 200    | 179.4  | PKMYT1    | <a href="#">NM_004203.3</a> | MYT1                                | protein     | Golgi        | regulation  |
| GI_33386694-A | 477.2  | 405.5  | 440.9  | PBEF1     | <a href="#">NM_182790.1</a> | PBEF                                | cytokine    |              | positive    |
| GI_33386694-I | 85.3   | 96.4   | 84     | PBEF1     | <a href="#">NM_182790.1</a> | PBEF                                | cytokine    |              | positive    |

|               |       |        |        |           |                             |                                       |             |                          |
|---------------|-------|--------|--------|-----------|-----------------------------|---------------------------------------|-------------|--------------------------|
| GI_33386698-S | 259.9 | 251.9  | 216.8  | TMSL1     | <a href="#">NM_182792.1</a> |                                       |             |                          |
| GI_33386700-S | 878.5 | 813.2  | 646.2  | TMSL4     | <a href="#">NM_182794.1</a> |                                       |             |                          |
| GI_33386702-S | 178.4 | 225.1  | 204.1  | TMSL2     | <a href="#">NM_182793.1</a> |                                       |             |                          |
| GI_33391149-S | 90.8  | 98     | 93.4   | NPM2      | <a href="#">NM_182795.1</a> | nucleic                               | nucleus     | regulation               |
| GI_33413399-S | 3937  | 3094.3 | 3192.4 | ESD       | <a href="#">NM_001984.1</a> | serine                                | cytoplasmic | biological_              |
| GI_33413401-A | 210.6 | 233.1  | 220.2  | APOB48R   | <a href="#">NM_182804.1</a> | lipoprotein                           | nucleus     | lipid                    |
| GI_33413413-S | 93.2  | 85.2   | 96.9   | FRAS1     | <a href="#">NM_025074.2</a> | FLJ14927;FLJ22031;KIAA1500            | electron    | electron                 |
| GI_33413424-S | 126.3 | 129.9  | 135.1  | KIAA1582  | <a href="#">NM_018996.2</a> | FLJ20015                              | nucleic     |                          |
| GI_33413430-A | 118.2 | 125.9  | 101.2  | TLX2      | <a href="#">NM_001534.2</a> | Enx;NCX;HOX11L1                       | molecular   | nucleus regulation       |
| GI_33413430-I | 95.7  | 107.7  | 97.3   | TLX2      | <a href="#">NM_001534.2</a> | Enx;NCX;HOX11L1                       | molecular   | nucleus regulation       |
| GI_33438574-S | 147.1 | 136.9  | 120.5  | ZNF8      | <a href="#">NM_021089.1</a> | HF.18                                 | DNA         | nucleus regulation       |
| GI_33438579-S | 146.2 | 191    | 172.9  | FLJ20203  | <a href="#">NM_032292.3</a> | FLJ12923;FLJ23040;KIAA1606;DKFZp76112 |             |                          |
| GI_33438581-S | 356.6 | 355    | 373.2  | TROAP     | <a href="#">NM_005480.2</a> | TASTIN                                | cell        | cytoplasm cell           |
| GI_33438585-S | 163.4 | 196.7  | 167.3  | ZNF77     | <a href="#">NM_021217.1</a> | pT1                                   | DNA         | nucleus regulation       |
| GI_33438589-S | 105.1 | 110.8  | 91.4   | DMRTC1    | <a href="#">NM_033053.1</a> |                                       |             |                          |
| GI_33438591-S | 98    | 107.7  | 101.3  | ZNF534    | <a href="#">NM_182512.1</a> | KRBO3;FLJ25344                        | nucleic     | intracellular regulation |
| GI_33438593-S | 241.7 | 300.2  | 263.8  | HLA-DQB2  | <a href="#">NM_182549.1</a> | HLA-DXB                               | MHC         | integral to immune       |
| GI_33438597-S | 103.5 | 120.9  | 94.4   | MGC48625  | <a href="#">NM_182609.1</a> |                                       | nucleic     | intracellular regulation |
| GI_33438599-S | 121.7 | 127.4  | 118    | FLJ39963  | <a href="#">NM_182633.1</a> |                                       | nucleic     | nucleus regulation       |
| GI_33457296-S | 116.6 | 141.1  | 120.6  | GDF7      | <a href="#">NM_182828.1</a> |                                       |             |                          |
| GI_33457298-S | 130.2 | 149.8  | 127.4  | TNT       | <a href="#">NM_182831.1</a> |                                       |             |                          |
| GI_33457300-S | 401.3 | 501.2  | 453    | LOC220032 | <a href="#">NM_182833.1</a> |                                       |             |                          |
| GI_33457305-S | 99.1  | 88.1   | 72.9   | PLAC4     | <a href="#">NM_182832.1</a> |                                       |             |                          |
| GI_33457307-S | 435.3 | 534.2  | 470.9  | HNLF      | <a href="#">NM_182547.2</a> |                                       | protein     | membran intracellular    |
| GI_33457310-S | 377.4 | 397.9  | 449.3  | MGC5987   | <a href="#">NM_138476.2</a> |                                       |             |                          |
| GI_33457315-S | 217.3 | 221.5  | 186.6  | pp9099    | <a href="#">NM_025201.3</a> | PP1628;DKFZp761K2312                  |             |                          |
| GI_33457321-S | 136.1 | 167.9  | 155.8  | LOC136306 | <a href="#">NM_174959.1</a> |                                       | transporte  | integral to transport    |
| GI_33457323-S | 93.9  | 86.8   | 82.1   | MGC46496  | <a href="#">NM_174952.1</a> |                                       |             |                          |
| GI_33457325-S | 143.9 | 180    | 153.1  | GSH1      | <a href="#">NM_145657.1</a> | Gsh-1                                 | transcripti | nucleus regulation       |
| GI_33457327-S | 126.2 | 129.5  | 119.4  | LOC90668  | <a href="#">NM_138360.1</a> |                                       |             |                          |
| GI_33457329-S | 165.2 | 192    | 168.9  | TTC14     | <a href="#">NM_133462.1</a> | FLJ00166;KIAA1980                     | RNA         |                          |
| GI_33457331-S | 422.4 | 495.6  | 495.8  | RAVER1    | <a href="#">NM_133452.1</a> | KIAA1978                              | nucleic     |                          |
| GI_33457333-S | 583.4 | 575.8  | 527.1  | TRIM47    | <a href="#">NM_033452.1</a> | GOA;RNF100                            | zinc ion    | intracellular            |
| GI_33457343-S | 439.4 | 411.5  | 348.2  | COG6      | <a href="#">NM_020751.1</a> | COD2;KIAA1134                         | protein     | membran intracellular    |
| GI_33457347-S | 5432  | 6742.6 | 6319.8 | C19orf10  | <a href="#">NM_019107.1</a> | IL25;IL27;SF20;IL-25;IL-              |             |                          |
| GI_33457353-S | 262.2 | 336.9  | 417.9  | BAK1      | <a href="#">NM_001188.2</a> | BAK;CDN1;BCL2L7                       | apoptosis   | integral to apoptotic    |
| GI_33457354-S | 162.9 | 177.3  | 150.4  | C6orf151  | <a href="#">NM_152551.2</a> | FLJ32234;dJ512B11.2;dJ336K20B.1       |             |                          |
| GI_33466360-S | 834.7 | 836.1  | 1288.7 | ARFRP1    | <a href="#">NM_003224.2</a> | ARP                                   | small       | peripheral signal        |
| GI_33468964-S | 247.1 | 210.6  | 197.6  | KIAA1143  | <a href="#">NM_020696.1</a> |                                       |             |                          |
| GI_33469020-S | 112.8 | 113.2  | 114.4  | KIAA1796  | <a href="#">NM_032439.1</a> |                                       |             |                          |
| GI_33469134-S | 561.3 | 588.3  | 378.8  | FRMD4     | <a href="#">NM_018027.2</a> | FLJ10210;KIAA1294;bA295P9.4           |             |                          |
| GI_33469136-A | 144.3 | 172.5  | 137.4  | SLC35E2   | <a href="#">NM_182838.1</a> | KIAA0447                              |             |                          |
| GI_33469136-I | 151.4 | 177.8  | 140.4  | SLC35E2   | <a href="#">NM_182838.1</a> | KIAA0447                              |             |                          |
| GI_33469142-S | 179.7 | 176.5  | 181.6  | LRRK1     | <a href="#">NM_024652.2</a> | FLJ23119;KIAA1790                     | protein-    | nucleus protein          |



|               |        |        |        |           |                             |                                      |                     |                    |
|---------------|--------|--------|--------|-----------|-----------------------------|--------------------------------------|---------------------|--------------------|
| GI_33469144-S | 97.2   | 110.5  | 104.5  | LOC158160 | <a href="#">NM_182829.1</a> |                                      | oxidoredu           | metabolis          |
| GI_33469146-I | 2281.5 | 2879   | 2452   | SLC35E2   | <a href="#">NM_014854.1</a> | KIAA0447                             |                     |                    |
| GI_33469915-S | 1162.2 | 1058.9 | 1014.1 | MCM3AP    | <a href="#">NM_003906.3</a> | GANP;MAP80;KIAA0572                  | adenosine nucleus   | protein-           |
| GI_33469916-A | 654.9  | 638.5  | 806.7  | MCM4      | <a href="#">NM_182746.1</a> | CDC21;CDC54;hCdc21;MGC33310;P1-      | adenosine chromatin | DNA                |
| GI_33469918-I | 128.9  | 118.3  | 121    | MCM4      | <a href="#">NM_005914.2</a> | CDC21;CDC54;hCdc21;MGC33310;P1-      | adenosine chromatin | DNA                |
| GI_33469920-S | 237    | 173.1  | 188.8  | MCM6      | <a href="#">NM_005915.4</a> | Mis5;P105MCM;MCG40308                | DNA                 | nucleus cell cycle |
| GI_33469921-I | 130.7  | 152.6  | 128.4  | MCM7      | <a href="#">NM_182776.1</a> | MCM2;CDC47;P85MCM;P1CDC47;PNAS-      |                     | chromatin DNA      |
| GI_33469923-I | 96.8   | 85.9   | 75.3   | MCM8      | <a href="#">NM_182802.1</a> | MGC4816;MGC12866;C20orf154;dJ967N21. | DNA                 | cell cycle         |
| GI_33469925-A | 1059.5 | 1262.4 | 1113.3 | MCM8      | <a href="#">NM_032485.4</a> | MGC4816;MGC12866;C20orf154;dJ967N21. | DNA                 | cell cycle         |
| GI_33469926-S | 85     | 87.4   | 69     | MCMDC1    | <a href="#">NM_153255.2</a> | MGC35304;dJ329L24.3                  | ATP                 | DNA                |
| GI_33469927-S | 86     | 88.1   | 75.3   | FLJ20097  | <a href="#">NM_024553.2</a> | FLJ23581;KIAA1861                    |                     |                    |
| GI_33469928-I | 128    | 145    | 128.5  | FLJ39155  | <a href="#">NM_152403.2</a> |                                      |                     |                    |
| GI_33469936-A | 201.8  | 227.3  | 194.4  | FLJ39155  | <a href="#">NM_182801.1</a> |                                      |                     |                    |
| GI_33469936-I | 160.4  | 192.2  | 176.1  | FLJ39155  | <a href="#">NM_182801.1</a> |                                      |                     |                    |
| GI_33469938-A | 429.1  | 374.3  | 190.7  | PLCB4     | <a href="#">NM_182797.1</a> | PI-PLC                               | phospholi           | intracellula       |
| GI_33469940-S | 1354.1 | 1030.8 | 752.5  | POLR1B    | <a href="#">NM_019014.2</a> | RPA135;Rpo1-2;FLJ10816;FLJ21921      |                     |                    |
| GI_33469942-S | 98.2   | 107.7  | 87.2   | FKBP9L    | <a href="#">NM_182827.1</a> | MGC20531                             |                     |                    |
| GI_33469944-A | 216.2  | 249.5  | 282.6  | ELMO2     | <a href="#">NM_022086.6</a> | CED12;FLJ11656;KIAA1834              |                     | membran phagocyto  |
| GI_33469948-I | 118.3  | 123    | 124.1  | RABGGTA   | <a href="#">NM_004581.2</a> |                                      | RAB-                | vision             |
| GI_33469950-A | 850    | 925.3  | 985.9  | RABGGTA   | <a href="#">NM_182836.1</a> |                                      | RAB-                | vision             |
| GI_33469953-A | 695.8  | 438    | 390.6  | RBM12     | <a href="#">NM_152838.2</a> | SWAN;KIAA0765;HRIHFB2091             | RNA                 | nucleus            |
| GI_33469954-S | 250.8  | 667.1  | 1018.5 | MAOA      | <a href="#">NM_000240.2</a> |                                      | amine               | membran biogenic   |
| GI_33469957-S | 212.5  | 223.5  | 218.5  | SDS       | <a href="#">NM_006843.2</a> | SDH                                  | L-serine            | L-serine           |
| GI_33469961-I | 154.4  | 150.6  | 142.6  | SF4       | <a href="#">NM_182812.1</a> | RBP;F23858;DKFZp434E2216             |                     |                    |
| GI_33469963-A | 561.9  | 629    | 577.8  | SF4       | <a href="#">NM_172231.2</a> | RBP;F23858;DKFZp434E2216             |                     |                    |
| GI_33469967-A | 7765.4 | 6957.7 | 8847.9 | MCM7      | <a href="#">NM_005916.3</a> | MCM2;CDC47;P85MCM;P1CDC47;PNAS-      |                     | chromatin DNA      |
| GI_33469967-I | 92.5   | 96.7   | 98.4   | MCM7      | <a href="#">NM_005916.3</a> | MCM2;CDC47;P85MCM;P1CDC47;PNAS-      |                     | chromatin DNA      |
| GI_33469969-A | 294.6  | 315.5  | 315.6  | AADAT     | <a href="#">NM_182662.1</a> | KATII                                | transamin           |                    |
| GI_33469969-I | 88.9   | 95.4   | 94.4   | AADAT     | <a href="#">NM_182662.1</a> | KATII                                | transamin           |                    |
| GI_33469971-I | 122.9  | 114.7  | 118.8  | AADAT     | <a href="#">NM_016228.3</a> | KATII                                | transamin           |                    |
| GI_33469972-S | 494    | 413.7  | 404.3  | ABHD5     | <a href="#">NM_016006.3</a> | CDS;CGI58;IECN2;NCIE2;MGC8731        | aminopept           | proteolysis        |
| GI_33469973-A | 3031.3 | 2270.8 | 1569   | ATF4      | <a href="#">NM_182810.1</a> | CREB2;TXREB;CREB-2;TAXREB67          | RNA                 | nucleus regulation |
| GI_33469975-I | 254.6  | 299.7  | 220    | ATF4      | <a href="#">NM_001675.2</a> | CREB2;TXREB;CREB-2;TAXREB67          | RNA                 | nucleus regulation |
| GI_33469977-A | 2069.6 | 2410.6 | 2036.5 | SCFD1     | <a href="#">NM_182835.1</a> | RA410;KIAA0917;STXBP1L2;C14orf163    |                     |                    |
| GI_33469981-S | 97.9   | 108.1  | 90.1   | BLK       | <a href="#">NM_001715.2</a> | MGC10442                             | protein-            | peripheral protein |
| GI_33469983-S | 1229.2 | 2093.5 | 1628.5 | ERP70     | <a href="#">NM_004911.3</a> | ERP72                                | protein             | endoplas protein   |
| GI_33469984-S | 263.1  | 296.8  | 287.8  | FKBP9     | <a href="#">NM_007270.2</a> | FKBP60;FKBP63;PPIase                 | cyclophilin         | endoplas protein   |
| GI_33469986-S | 342.2  | 293.5  | 269.4  | HT001     | <a href="#">NM_014065.2</a> |                                      | nuclease            | DNA                |
| GI_33469988-S | 179.3  | 589.3  | 347.8  | NID2      | <a href="#">NM_007361.2</a> |                                      | collagen            | basement cell      |
| GI_33469990-S | 110.8  | 106.5  | 100.4  | TRIM40    | <a href="#">NM_138700.2</a> | RNF35                                | zinc ion            | intracellula       |
| GI_33504488-S | 2395.1 | 1005.2 | 282.7  | ZD52F10   | <a href="#">NM_033317.2</a> |                                      |                     |                    |
| GI_33504490-S | 106.4  | 132.8  | 96.4   | C10orf81  | <a href="#">NM_024889.2</a> | FLJ23537;bA211N11.2                  | electron            | electron           |
| GI_33504570-A | 87.2   | 94.5   | 84.7   | SLIC1     | <a href="#">NM_182854.1</a> | MGC35578                             |                     |                    |
| GI_33504570-I | 90.4   | 91.2   | 85.1   | SLIC1     | <a href="#">NM_182854.1</a> | MGC35578                             |                     |                    |

|               |        |        |        |           |                             |                               |             |             |              |
|---------------|--------|--------|--------|-----------|-----------------------------|-------------------------------|-------------|-------------|--------------|
| GI_33504572-S | 114.6  | 108.9  | 107.8  | FLJ33915  | <a href="#">NM_182613.1</a> | DKFZP434I225                  |             |             |              |
| GI_33504574-S | 120.6  | 135.1  | 100.9  | LOC348174 | <a href="#">NM_182619.1</a> |                               |             |             |              |
| GI_33519429-A | 1749.5 | 2831.7 | 1736.4 | TXNRD1    | <a href="#">NM_182743.1</a> | TR;TR1;TXNR;MGC9145           | thioredoxi  | cytoplasm   | signal       |
| GI_33519435-A | 4377.6 | 3013.1 | 2323.8 | CCNB1IP1  | <a href="#">NM_182849.1</a> | HEI10;C14orf18                | ligase      | extrachro   |              |
| GI_33519437-I | 121    | 124.2  | 122.3  | CCNB1IP1  | <a href="#">NM_182851.1</a> | HEI10;C14orf18                | ligase      | extrachro   |              |
| GI_33519439-I | 98.9   | 96     | 88.8   | CCNB1IP1  | <a href="#">NM_182852.1</a> | HEI10;C14orf18                | ligase      | extrachro   |              |
| GI_33519441-I | 113.5  | 122    | 118.8  | ACCN4     | <a href="#">NM_018674.3</a> | ASIC4;BNAC4;MGC17248          | sodium      | integral to | small        |
| GI_33519443-A | 138.6  | 156.4  | 154.6  | ACCN4     | <a href="#">NM_182847.1</a> | ASIC4;BNAC4;MGC17248          | sodium      | integral to | small        |
| GI_33519445-A | 650    | 2136.2 | 958.1  | NBL1      | <a href="#">NM_005380.3</a> | NB;DAN;NO3;MGC8972;D1S1733E   | tumor       |             | cell growth  |
| GI_33519446-I | 100.1  | 98.3   | 94     | NBL1      | <a href="#">NM_182744.1</a> | NB;DAN;NO3;MGC8972;D1S1733E   | tumor       |             | cell growth  |
| GI_33519448-S | 91.2   | 96.1   | 93.6   | NALP10    | <a href="#">NM_176821.2</a> | NOD8                          |             |             |              |
| GI_33519449-S | 170.1  | 214    | 188.1  | NALP9     | <a href="#">NM_176820.2</a> | NOD6                          | structural  | ribosome    | protein      |
| GI_33519451-A | 229.3  | 279.9  | 220.6  | C21orf127 | <a href="#">NM_182749.1</a> | N6AMT1;PRED28;MGC19995        |             |             |              |
| GI_33519453-I | 206.1  | 196.7  | 163.4  | C21orf127 | <a href="#">NM_013240.2</a> | N6AMT1;PRED28;MGC19995        |             |             |              |
| GI_33519454-I | 96.4   | 94.7   | 86.3   | MAT2B     | <a href="#">NM_182796.1</a> | TGR;MAT-II;MGC12237;MATIIBeta | transferas  |             | extracellul  |
| GI_33519456-A | 1483.3 | 1429.3 | 1608.9 | MAT2B     | <a href="#">NM_013283.3</a> | TGR;MAT-II;MGC12237;MATIIBeta | transferas  |             | extracellul  |
| GI_33519456-I | 196.5  | 188.8  | 187.8  | MAT2B     | <a href="#">NM_013283.3</a> | TGR;MAT-II;MGC12237;MATIIBeta | transferas  |             | extracellul  |
| GI_33519457-A | 1488.6 | 1381.5 | 1396.3 | MCL1      | <a href="#">NM_182763.1</a> | TM;EAT;MCL1L;MCL1S;MGC1839    |             |             | apoptotic    |
| GI_33519459-I | 383.6  | 425.8  | 396.2  | MCL1      | <a href="#">NM_021960.3</a> | TM;EAT;MCL1L;MCL1S;MGC1839    |             |             | apoptotic    |
| GI_33519460-S | 376.6  | 457.1  | 420.8  | MGC43690  | <a href="#">NM_182552.2</a> |                               |             |             |              |
| GI_33519462-S | 1775.4 | 1755.4 | 1350.1 | NDUFA10   | <a href="#">NM_004544.2</a> | CI-42KD;MGC5103               | NADH        | NADH        | energy       |
| GI_33519463-S | 5008.4 | 6706.3 | 5621   | NDUFA4    | <a href="#">NM_002489.2</a> | MLRQ;CI-MLRQ                  | NADH        | NADH        |              |
| GI_33519464-S | 1243   | 1615.3 | 1680   | NDUFA8    | <a href="#">NM_014222.2</a> | PGIV;MGC793;CI-19KD;CI-PGIV   | NADH        | NADH        |              |
| GI_33519465-S | 2232   | 2855.5 | 2773.2 | NDUFB2    | <a href="#">NM_004546.2</a> | AGGG;CI-AGGG                  | NADH        | NADH        | mitochond    |
| GI_33519467-S | 6064   | 6400.5 | 5168.5 | NDUFB5    | <a href="#">NM_002492.2</a> | SGDH;CI-SGDH;MGC12314         | NADH        | NADH        | mitochond    |
| GI_33519468-A | 1513.6 | 1898.2 | 1833.1 | NDUFB6    | <a href="#">NM_182739.1</a> | CI;B17;MGC13675               | NADH        | NADH        | mitochond    |
| GI_33519471-S | 4419.5 | 4564   | 4188.9 | NDUFB7    | <a href="#">NM_004146.4</a> | B18;CI-B18;MGC2480            | NADH        | NADH        |              |
| GI_33519472-S | 370.9  | 393.2  | 394.1  | NDFIP1    | <a href="#">NM_030571.2</a> | N4WBP5;MGC10924               |             |             |              |
| GI_33519473-S | 284.8  | 232.1  | 237.1  | NDP52     | <a href="#">NM_005831.3</a> | MGC17318                      |             | nucleus     | viral life   |
| GI_33519474-S | 143.2  | 157.4  | 157.7  | NDUFS1    | <a href="#">NM_005006.5</a> | CI-75Kd;PRO1304;MGC26839      | iron-sulfur | NADH        | mitochond    |
| GI_33519477-S | 610.5  | 630.1  | 672.2  | EIF1A     | <a href="#">NM_001412.2</a> | EIF4C;EIF1AX;eIF-1A;eIF-4C    | translation | eukaryotic  | translation  |
| GI_33519480-S | 110.3  | 110.5  | 108.9  | NCAM2     | <a href="#">NM_004540.2</a> | NCAM21;MGC51008               | cell        | integral to | neuronal     |
| GI_33519482-S | 1148   | 1054.7 | 890.1  | NCK1      | <a href="#">NM_006153.3</a> | NCK;MGC12668;NCKalpha         | cytoskelet  | cytoplasm   | intracellula |
| GI_33563285-S | 1327.4 | 1704.1 | 1409.3 | VPS39     | <a href="#">NM_015289.1</a> | TLP;KIAA0770                  | small       |             | intracellula |
| GI_33563295-S | 158.5  | 201.9  | 170.1  | SPACA4    | <a href="#">NM_133498.2</a> | SAMP14                        |             |             |              |
| GI_33563339-S | 247.2  | 296    | 264.5  | MYH14     | <a href="#">NM_024729.2</a> | NHMCII;FLJ13881;KIAA2034      | motor       | myosin      |              |
| GI_33563375-S | 530.5  | 623.3  | 396.3  | TBC1D16   | <a href="#">NM_019020.2</a> | FLJ20748;MGC25062             |             |             |              |
| GI_33569215-S | 105.1  | 110.3  | 103    | LHX9      | <a href="#">NM_020204.2</a> |                               | transcripti | nucleus     | regulation   |
| GI_33569217-S | 818.8  | 1014.4 | 999.8  | LYK5      | <a href="#">NM_153335.3</a> | STRAD;FLJ90524                | protein-    |             | protein      |
| GI_33589813-S | 979.1  | 1184.2 | 1199.3 | C9orf60   | <a href="#">NM_006336.2</a> | ZYG                           |             |             |              |
| GI_33589819-S | 99.6   | 117.6  | 105    | PHKG1     | <a href="#">NM_006213.2</a> | PHKG                          | phosphory   | phosphory   | energy       |
| GI_33589822-S | 88.7   | 88     | 83.9   | PKD4      | <a href="#">NM_002612.2</a> |                               | [pyruvate   | mitochond   | glucose      |
| GI_33589823-S | 135.3  | 154.8  | 140    | CGREF1    | <a href="#">NM_006569.2</a> | CGR11                         | calcium     |             | negative     |
| GI_33589825-S | 3513.7 | 3951.6 | 3636.3 | APG10L    | <a href="#">NM_031482.3</a> | FLJ13954;DKFZP586I0418        |             |             |              |

|               |        |        |        |            |                             |                                     |             |                          |
|---------------|--------|--------|--------|------------|-----------------------------|-------------------------------------|-------------|--------------------------|
| GI_33589826-S | 755    | 826.4  | 816.2  | CHRNA5     | <a href="#">NM_000745.2</a> | nicotinic                           | nicotinic   | small                    |
| GI_33589828-S | 4148.1 | 3090.5 | 2140.9 | CACNA2D4   | <a href="#">NM_172364.2</a> |                                     | membran     |                          |
| GI_33589832-S | 622.7  | 597.4  | 507.8  | CHPPR      | <a href="#">NM_014637.2</a> | KIAA0009                            |             |                          |
| GI_33589836-S | 156.9  | 879.7  | 183.9  | ITM2A      | <a href="#">NM_004867.2</a> | E25A;BRICD2A                        |             | integral to              |
| GI_33589838-S | 121.1  | 135.4  | 131.4  | TOB2       | <a href="#">NM_016272.2</a> | TOB4;TOBL;TROB2;bK223H9;KIAA1663;bK |             | nucleus negative         |
| GI_33589842-S | 230.9  | 274.4  | 243.2  | MARK1      | <a href="#">NM_018650.2</a> | MARK;KIAA1477                       | protein     | microtubul regulation    |
| GI_33589844-S | 278.2  | 339.9  | 330.1  | ED1        | <a href="#">NM_001399.2</a> | EDA;HED;EDA1;XHED;XLHED             | receptor    | cytoskelet ectoderm      |
| GI_33589845-S | 271.1  | 317.9  | 333.3  | TEB4       | <a href="#">NM_005885.2</a> | KIAA0597                            |             |                          |
| GI_33589847-S | 149.4  | 194.2  | 169.8  | TFR2       | <a href="#">NM_003227.2</a> | HFE3                                | transferrin | membran iron ion         |
| GI_33589849-A | 147.5  | 173.6  | 159.3  | KIR2DL3    | <a href="#">NM_014511.2</a> | p58;CL-                             | receptor    | integral to immune       |
| GI_33589851-S | 94.5   | 100.5  | 112.4  | TG         | <a href="#">NM_003235.3</a> |                                     | hormone     | soluble signal           |
| GI_33589857-I | 386.1  | 478.8  | 401.9  | SCN1B      | <a href="#">NM_001037.2</a> | GEFSP1                              | voltage-    | integral to sodium       |
| GI_33589858-I | 135.3  | 145    | 129.4  | CREB5      | <a href="#">NM_182898.1</a> | CRE-BPA                             | transcripti | nucleus transcripti      |
| GI_33589860-S | 4496.8 | 7251.1 | 5805.2 | RAB31      | <a href="#">NM_006868.2</a> | Rab22B                              | RAB small   | nonselecti               |
| GI_33591068-S | 2509.8 | 2922.4 | 2161.8 | BLMH       | <a href="#">NM_000386.2</a> | BH;BMH                              | bleomycin   | cytoplasm proteolysis    |
| GI_33598909-I | 107.7  | 102.1  | 93.2   | ACVR1B     | <a href="#">NM_020327.2</a> | ALK4;SKR2;ACTRIB;ACVRLK4            | transmem    | integral to transmem     |
| GI_33598911-A | 168.8  | 185.5  | 170.8  | ACVR1B     | <a href="#">NM_020328.2</a> | ALK4;SKR2;ACTRIB;ACVRLK4            | transmem    | integral to transmem     |
| GI_33598911-I | 116.1  | 117.4  | 117.5  | ACVR1B     | <a href="#">NM_020328.2</a> | ALK4;SKR2;ACTRIB;ACVRLK4            | transmem    | integral to transmem     |
| GI_33598913-I | 586.1  | 567.9  | 536.8  | ACVR1B     | <a href="#">NM_004302.3</a> | ALK4;SKR2;ACTRIB;ACVRLK4            | transmem    | integral to transmem     |
| GI_33598917-S | 85.6   | 99.7   | 82.5   | CLDN11     | <a href="#">NM_005602.4</a> | OSP;OTM                             | structural  | tight                    |
| GI_33598918-A | 2825   | 2669.5 | 1902.4 | SCAMP1     | <a href="#">NM_052822.2</a> | SCAMP;SCAMP37                       | protein     | integral to post-Golgi   |
| GI_33598919-I | 183.7  | 196.8  | 157.2  | SCAMP1     | <a href="#">NM_004866.3</a> | SCAMP;SCAMP37                       | protein     | integral to post-Golgi   |
| GI_33598921-A | 194.8  | 286.4  | 160.8  | SCARA3     | <a href="#">NM_182826.1</a> | CSR;APC7;CSR1;MSLR1;MSRL1           | scavenger   | UV                       |
| GI_33598921-I | 130.2  | 154.1  | 96.3   | SCARA3     | <a href="#">NM_182826.1</a> | CSR;APC7;CSR1;MSLR1;MSRL1           | scavenger   | UV                       |
| GI_33598923-I | 524.1  | 802.6  | 583.5  | SCARA3     | <a href="#">NM_016240.2</a> | CSR;APC7;CSR1;MSLR1;MSRL1           | scavenger   | UV                       |
| GI_33598925-S | 4651   | 4209.7 | 4610.4 | SCARB2     | <a href="#">NM_005506.2</a> | CD36L2;HLGP85;LIMPII                | receptor    | lysosomal cell           |
| GI_33598932-I | 188    | 208.2  | 199.6  | SCARF1     | <a href="#">NM_145351.1</a> | SREC;KIAA0149;MGC47738              | scavenger   | membran receptor         |
| GI_33598934-A | 130.7  | 138.7  | 117.6  | SCARF1     | <a href="#">NM_145352.1</a> | SREC;KIAA0149;MGC47738              | scavenger   | membran receptor         |
| GI_33598936-A | 1398.1 | 912.5  | 379.6  | SCARF2     | <a href="#">NM_182895.1</a> | SREC2;SREC-II;SRECRP-1              |             |                          |
| GI_33598939-A | 440.1  | 414.6  | 351.5  | PKD1L2     | <a href="#">NM_182740.1</a> |                                     |             |                          |
| GI_33598941-I | 250.1  | 294.9  | 240.4  | PKD1L2     | <a href="#">NM_052892.2</a> |                                     |             |                          |
| GI_33598943-S | 95.8   | 107.5  | 91.3   | PKD2L1     | <a href="#">NM_016112.2</a> | PCL;PKDL;PKD2L                      | calcium     | integral to cation       |
| GI_33598945-A | 2448.1 | 2412   | 2018.7 | PLCG1      | <a href="#">NM_182811.1</a> | PLC1;PLC-II;PLC148                  | calcium     | cellular_co intracellula |
| GI_33598949-S | 668.7  | 497.1  | 852.4  | PODXL      | <a href="#">NM_005397.2</a> | PCLP;Gp200                          |             | integral to              |
| GI_33598951-S | 493.6  | 429.5  | 299.4  | POLR3F     | <a href="#">NM_006466.2</a> | RPC6;RPC39;MGC13517                 | DNA-        | DNA- regulation          |
| GI_33598953-S | 171.7  | 179.1  | 173.3  | DKFZp586G0 | <a href="#">NM_013386.2</a> |                                     |             |                          |
| GI_33598955-I | 92.7   | 104.7  | 86.5   | DKFZp761H0 | <a href="#">NM_182896.1</a> |                                     |             |                          |
| GI_33598957-A | 159.6  | 163.7  | 145    | DKFZp761H0 | <a href="#">NM_144996.2</a> |                                     |             |                          |
| GI_33598957-I | 99.4   | 107.8  | 106    | DKFZp761H0 | <a href="#">NM_144996.2</a> |                                     |             |                          |
| GI_33598959-S | 161.6  | 181.9  | 172.5  | ADRA2B     | <a href="#">NM_000682.3</a> | ADRA2L1;ADRARL1;ADRA2RL1            | alpha2-     | integral to G-protein    |
| GI_33598961-S | 123.7  | 131    | 128.2  | EPHB3      | <a href="#">NM_004443.3</a> | ETK2;HEK2;TYRO6                     | transmem    | integral to signal       |
| GI_33598962-S | 490.5  | 522.4  | 558.1  | MTMR9      | <a href="#">NM_015458.3</a> | MTMR8;C8orf9;LIP-STYX;DKFZp434K171  |             |                          |
| GI_33598967-S | 234.4  | 216.2  | 149    | LMO7       | <a href="#">NM_005358.3</a> | LOMP;FBX20;FBXO20;KIAA0858          | ubiquitin-  | cytoplasm intracellula   |
| GI_33620720-S | 465.5  | 428.5  | 284    | DEXI       | <a href="#">NM_014015.3</a> | MYLE                                |             |                          |

|               |        |        |        |            |                             |                                     |            |              |            |
|---------------|--------|--------|--------|------------|-----------------------------|-------------------------------------|------------|--------------|------------|
| GI_33620721-I | 161.3  | 186.3  | 166.4  | VGLL2      | <a href="#">NM_182645.2</a> | VGL2;VITO1                          |            |              |            |
| GI_33620726-S | 787.2  | 1215   | 1069.2 | TRA2A      | <a href="#">NM_013293.2</a> | HSU53209                            | pre-mRNA   | nucleus      | mRNA       |
| GI_33620740-S | 136.2  | 145    | 122.4  | KIF3A      | <a href="#">NM_007054.3</a> |                                     | ATP        | kinesin      | organelle  |
| GI_33620741-S | 232.4  | 221.2  | 221.5  | FZR1       | <a href="#">NM_016263.2</a> | FZR;FZR2;HCDH;HCDH1;KIAA1242        | enzyme     | anaphase-    | ubiquitin- |
| GI_33620743-A | 124.4  | 135.9  | 120.9  | KIF9       | <a href="#">NM_182903.2</a> |                                     | ATP        | kinesin      | microtubul |
| GI_33620743-I | 125    | 138.5  | 129.7  | KIF9       | <a href="#">NM_182903.2</a> |                                     | ATP        | kinesin      | microtubul |
| GI_33620744-S | 277.7  | 203.6  | 225.8  | PCF11      | <a href="#">NM_015885.2</a> | KIAA0824                            | pre-mRNA   | nucleus      | mRNA       |
| GI_33620746-S | 108.7  | 124.2  | 115    | MYEF2      | <a href="#">NM_016132.2</a> | MEF-2;FLJ11213;HsT18564;KIAA1341    | RNA        | nucleus      | myoblast   |
| GI_33620748-S | 193.1  | 189.9  | 167.3  | KIAA1333   | <a href="#">NM_017769.2</a> | FLJ20333                            | ubiquitin- | intracellula | ubiquitin  |
| GI_33620750-S | 256.7  | 307.3  | 403.1  | PCYOX1     | <a href="#">NM_016297.2</a> | PCL1;KIAA0908                       | lyase      | lysosome     | prenylated |
| GI_33620752-S | 293.3  | 329.3  | 259.9  | FLJ10876   | <a href="#">NM_018254.2</a> |                                     |            |              |            |
| GI_33620753-S | 172.3  | 232    | 206.6  | FLJ10404   | <a href="#">NM_019057.2</a> | KIAA1931                            | DNA        | nucleus      | regulation |
| GI_33620754-S | 1041.3 | 1004.9 | 633    | FLJ10201   | <a href="#">NM_018023.3</a> | FLJ12841;FLJ13308;KIAA1197          |            |              |            |
| GI_33620756-S | 164.7  | 171.4  | 172.3  | FLJ10324   | <a href="#">NM_018059.2</a> | KIAA1849                            |            |              |            |
| GI_33620758-S | 423.2  | 490.7  | 410.2  | DKFZp76100 | <a href="#">NM_018409.2</a> |                                     |            |              |            |
| GI_33620762-S | 137.8  | 158.4  | 138.9  | SBNO1      | <a href="#">NM_018183.2</a> | Sno;MOP3;FLJ10701;FLJ10833          | nucleic    |              |            |
| GI_33620766-S | 1143.6 | 1806.8 | 1202.6 | SCARB1     | <a href="#">NM_005505.3</a> | CLA1;SRB1;CLA-1;SR-BI;CD36L1        | transporte | membran      | cholester  |
| GI_33620772-S | 1616.2 | 1269.7 | 1099.1 | KIAA0020   | <a href="#">NM_014878.3</a> | XTP5;MGC8749                        | RNA        | nucleus      |            |
| GI_33620774-I | 89.1   | 100    | 91     | KTN1       | <a href="#">NM_182926.1</a> | CG1;KNT;KIAA0004                    |            | endoplas     | nonselecti |
| GI_33620778-S | 1101.7 | 1336.1 | 1475   | LSM4       | <a href="#">NM_012321.2</a> | YER112W                             | small      | snRNP U6     | mRNA       |
| GI_33624782-I | 107.9  | 115.5  | 102.2  | 6-Sep      | <a href="#">NM_145799.2</a> | SEP2;KIAA0128;MGC16619;MGC20339     | GTP        | kinesin      | cytokinesi |
| GI_33624820-A | 128.4  | 177.8  | 81.5   | 6-Sep      | <a href="#">NM_145802.2</a> | SEP2;KIAA0128;MGC16619;MGC20339     | GTP        | kinesin      | cytokinesi |
| GI_33624847-I | 97.8   | 90.6   | 73.3   | SYNE2      | <a href="#">NM_015180.3</a> | NUA;NUANCE;SYNE-2;KIAA1011;Nesprin- | receptor   | kinesin      | protein    |
| GI_33624860-I | 167.5  | 175.4  | 173.7  | SYNE2      | <a href="#">NM_182910.1</a> | NUA;NUANCE;SYNE-2;KIAA1011;Nesprin- | receptor   | kinesin      | protein    |
| GI_33624872-A | 139.8  | 162.7  | 154.1  | SYNE2      | <a href="#">NM_182913.1</a> | NUA;NUANCE;SYNE-2;KIAA1011;Nesprin- | receptor   | kinesin      | protein    |
| GI_33624872-I | 136.1  | 158.6  | 139    | SYNE2      | <a href="#">NM_182913.1</a> | NUA;NUANCE;SYNE-2;KIAA1011;Nesprin- | receptor   | kinesin      | protein    |
| GI_33624878-I | 94.2   | 96.3   | 86.7   | SYNE2      | <a href="#">NM_182914.1</a> | NUA;NUANCE;SYNE-2;KIAA1011;Nesprin- | receptor   | kinesin      | protein    |
| GI_33624884-A | 94.6   | 88.2   | 92.5   | ADAMTS9    | <a href="#">NM_020249.2</a> | KIAA1312                            | metallope  | extracellul  | glycoprote |
| GI_33624884-I | 109.6  | 108.9  | 116.3  | ADAMTS9    | <a href="#">NM_020249.2</a> | KIAA1312                            | metallope  | extracellul  | glycoprote |
| GI_33624895-I | 154.5  | 174.5  | 225.8  | ADAMTS9    | <a href="#">NM_182920.1</a> | KIAA1312                            | metallope  | extracellul  | glycoprote |
| GI_33624901-I | 97.1   | 95.2   | 94.2   | ADAMTS9    | <a href="#">NM_182921.1</a> | KIAA1312                            | metallope  | extracellul  | glycoprote |
| GI_33624912-S | 138.7  | 146.5  | 141.9  | AQP2       | <a href="#">NM_000486.3</a> | AQP-CD;WCH-CD;MGC34501              | water      | secretory    | water      |
| GI_33636688-S | 210.1  | 251.8  | 221.4  | DKFZP586M  | <a href="#">NM_031294.2</a> |                                     |            |              |            |
| GI_33636690-S | 230.4  | 232.4  | 218.1  | TMC7       | <a href="#">NM_024847.2</a> | FLJ21240                            |            | integral to  |            |
| GI_33636694-S | 190.2  | 189.1  | 151.3  | MLF1       | <a href="#">NM_022443.2</a> |                                     |            |              |            |
| GI_33636697-S | 162.9  | 171.2  | 173    | TLK1       | <a href="#">NM_012290.3</a> | KIAA0137;PKU-BETA                   | cAMP-      | nucleus      | response   |
| GI_33636700-S | 596.6  | 534.5  | 759    | TK2        | <a href="#">NM_004614.2</a> |                                     | thymidine  | mitochond    | nucleobas  |
| GI_33636716-S | 144.4  | 219.4  | 264.7  | KIAA1539   | <a href="#">NM_025182.2</a> | FLJ11560;bA182N22.6                 |            |              |            |
| GI_33636718-S | 813.7  | 623.6  | 531.1  | TIMM44     | <a href="#">NM_006351.2</a> | TIM44                               | protein    | peripheral   | mitochond  |
| GI_33636720-S | 2899.2 | 4016   | 3316.9 | PRKAR1A    | <a href="#">NM_002734.2</a> | CAR;CNC1;TSE1;PRKAR1                | cAMP-      | cAMP-        | regulation |
| GI_33636737-I | 966.8  | 811.1  | 664.3  | PRKACB     | <a href="#">NM_182948.1</a> |                                     | cAMP-      | nucleus      | signal     |
| GI_33636741-I | 832.5  | 1574   | 443.7  | PLOD2      | <a href="#">NM_182943.1</a> |                                     | procollage | membran      | protein    |
| GI_33636747-S | 503.8  | 513.8  | 530.9  | FLJ21439   | <a href="#">NM_025137.2</a> | KIAA1840                            | DNA        | nucleus      | carbohydr  |
| GI_33636749-S | 243.2  | 317.6  | 335.1  | E2-230K    | <a href="#">NM_022066.2</a> | FLJ12878;KIAA1734                   | ubiquitin  |              | ubiquitin  |

|               |         |        |        |            |                             |                                     |                     |             |             |
|---------------|---------|--------|--------|------------|-----------------------------|-------------------------------------|---------------------|-------------|-------------|
| GI_33636751-S | 119.2   | 126.2  | 109.3  | FA2H       | <a href="#">NM_024306.2</a> | FAAH;FAXDC1                         | catalytic           | electron    |             |
| GI_33636753-S | 132     | 156.4  | 171.5  | ZNFN1A4    | <a href="#">NM_022465.2</a> | EOS;KIAA1782                        |                     |             |             |
| GI_33636755-S | 95.1    | 98.7   | 94.2   | MARK4      | <a href="#">NM_031417.2</a> | MARKL1;KIAA1860                     |                     |             |             |
| GI_33636757-S | 428.7   | 414.6  | 351.7  | RNF146     | <a href="#">NM_030963.2</a> | dJ351K20.1;DKFZP434O1427            |                     |             |             |
| GI_33636761-S | 194.7   | 266.2  | 178.8  | ZFYVE19    | <a href="#">NM_032850.3</a> | MPFYVE;FLJ14840                     | zinc ion            | electron    |             |
| GI_33636763-S | 201.3   | 259.9  | 221.9  | FLJ25555   | <a href="#">NM_152345.3</a> |                                     |                     |             |             |
| GI_33636765-S | 465.9   | 386.7  | 188.3  | LHPP       | <a href="#">NM_022126.2</a> |                                     | hydrolase           | metabolis   |             |
| GI_33636767-I | 119.7   | 133.3  | 121.8  | MLL5       | <a href="#">NM_182931.1</a> | FLJ10078;FLJ14026;HDCMC04P          |                     |             |             |
| GI_33636770-I | 171.5   | 216.4  | 199.1  | MOBP       | <a href="#">NM_182935.1</a> |                                     |                     | soluble     | neurogene   |
| GI_33667022-S | 1180.9  | 1248.1 | 1114.5 | EIF2B5     | <a href="#">NM_003907.1</a> | CLE;CACH;LVWM;EIF-2B;EIF2Bepsilon   | translation         | cellular_co | amino       |
| GI_33667024-S | 276.2   | 378.7  | 411.9  | ZNF20      | <a href="#">NM_021143.1</a> | KOX13                               | protein             | nucleus     | regulation  |
| GI_33667026-S | 10078.5 | 11658  | 8220.6 | DC50       | <a href="#">NM_031210.3</a> | PD04872                             | nucleic             |             |             |
| GI_33667027-S | 524     | 605    | 549.7  | IRF2BP2    | <a href="#">NM_182972.1</a> |                                     |                     |             |             |
| GI_33667029-S | 163     | 215.6  | 165.8  | ALDRL6     | <a href="#">NM_017584.4</a> | MIOX;ALDR6R                         | aldo-keto           | cytoplasm   | membran     |
| GI_33667031-S | 101     | 93.1   | 91.4   | COX8-3     | <a href="#">NM_182971.1</a> |                                     |                     |             |             |
| GI_33667037-S | 175.4   | 197.3  | 173.9  | STX11      | <a href="#">NM_003764.2</a> |                                     | SNAP                | kinesin     | membran     |
| GI_33667039-S | 86.7    | 91.1   | 86.4   | NALP8      | <a href="#">NM_176811.2</a> | NOD16                               |                     |             |             |
| GI_33667043-S | 129.7   | 113.2  | 107.9  | TARSH      | <a href="#">NM_015429.2</a> | NESHBP;FLJ21551;DKFZP586L2024       |                     |             |             |
| GI_33667045-I | 133.4   | 186.8  | 109.9  | NEDD9      | <a href="#">NM_006403.2</a> | CASL;HEF1;CAS-L                     | cell                | spindle     | mitosis     |
| GI_33667050-S | 2748.4  | 2811.7 | 3452.5 | DP1        | <a href="#">NM_005669.3</a> | TB2;D5S346                          | molecular           | integral to | hypersens   |
| GI_33667052-A | 99      | 118.6  | 92.9   | NEDD9      | <a href="#">NM_182966.1</a> | CASL;HEF1;CAS-L                     | cell                | spindle     | mitosis     |
| GI_33667052-I | 96.1    | 126.7  | 114.8  | NEDD9      | <a href="#">NM_182966.1</a> | CASL;HEF1;CAS-L                     | cell                | spindle     | mitosis     |
| GI_33667062-S | 151.5   | 163.9  | 153.1  | LOC360200  | <a href="#">NM_182973.1</a> |                                     | trypsin             |             | proteolysis |
| GI_33667064-S | 106.4   | 96.4   | 98.3   | GLTDC1     | <a href="#">NM_182974.1</a> |                                     | transferas          |             |             |
| GI_33667066-S | 127.9   | 164    | 174.6  | HCST       | <a href="#">NM_014266.3</a> | DAP10;KAP10;PIK3AP;DKFZP586C1522    | SH3/SH2             | integral to | humoral     |
| GI_33667071-S | 112     | 106.8  | 90.2   | CMRF-35H   | <a href="#">NM_007261.1</a> | IRC1;IRC2;IRp60;CMRF35H;CMRF35H9;CM |                     |             |             |
| GI_33667073-S | 141     | 158.3  | 135.7  | LOC55908   | <a href="#">NM_018687.3</a> |                                     |                     |             |             |
| GI_33667080-S | 189.4   | 225.8  | 222.5  | DKFZP761H1 | <a href="#">NM_031297.2</a> |                                     |                     |             |             |
| GI_33667083-S | 635.3   | 659.3  | 664.6  | DNAJC9     | <a href="#">NM_015190.3</a> | JDD1;SB73;KIAA0974                  |                     |             |             |
| GI_33667098-I | 107.9   | 117    | 95     | C21orf69   | <a href="#">NM_182900.1</a> | PRED54                              |                     |             |             |
| GI_33667100-I | 104.9   | 122.1  | 104.5  | C11orf17   | <a href="#">NM_182901.1</a> | BCA3                                |                     |             |             |
| GI_33667102-I | 257.1   | 329.6  | 289    | CLECSF14   | <a href="#">NM_182906.1</a> | HML;HML2;CLECSF13                   | lectin [goid plasma | heterophili |             |
| GI_33667104-I | 109.9   | 108.1  | 97.6   | DOC1       | <a href="#">NM_182909.1</a> | GIP90                               |                     |             |             |
| GI_33667106-I | 103     | 105.5  | 95.7   | ERG        | <a href="#">NM_182918.1</a> |                                     | DNA                 | nucleus     | protein     |
| GI_33667110-I | 176.1   | 211.9  | 216.3  | FLT4       | <a href="#">NM_182925.1</a> | PCL;VEGFR3                          | vascular            | integral to | transmem    |
| GI_33667114-I | 123.7   | 137.9  | 124.8  | GEFT       | <a href="#">NM_182947.1</a> |                                     |                     |             |             |
| GI_33667116-I | 149.2   | 151    | 168.6  | FLJ23471   | <a href="#">NM_182924.1</a> |                                     |                     |             |             |
| GI_33695073-S | 102.7   | 107.7  | 104.9  | DDI2       | <a href="#">NM_032341.2</a> |                                     |                     |             |             |
| GI_33695083-I | 170.9   | 182    | 155.9  | NNT        | <a href="#">NM_012343.2</a> |                                     | NAD(P)              | mitochond   | energy      |
| GI_33695085-A | 343.8   | 545.7  | 257.1  | NNT        | <a href="#">NM_182977.1</a> |                                     | NAD(P)              | mitochond   | energy      |
| GI_33695085-I | 79.6    | 103.7  | 76.8   | NNT        | <a href="#">NM_182977.1</a> |                                     | NAD(P)              | mitochond   | energy      |
| GI_33695087-S | 194.4   | 222.6  | 182.7  | GPD1       | <a href="#">NM_005276.2</a> |                                     | glycerol-3-         | glycerol-3- | carbohydr   |
| GI_33695089-S | 2484.3  | 2926.8 | 2821.6 | PTOV1      | <a href="#">NM_017432.2</a> | DKFZP586I111                        | ATP                 | nucleus     | tRNA        |
| GI_33695091-I | 136.1   | 142.4  | 139    | OKL38      | <a href="#">NM_013370.2</a> |                                     |                     |             |             |

|               |        |        |        |          |                             |                                      |             |                         |
|---------------|--------|--------|--------|----------|-----------------------------|--------------------------------------|-------------|-------------------------|
| GI_33695094-S | 3768.3 | 3702.9 | 3554.9 | RAB10    | <a href="#">NM_016131.2</a> | GTP                                  |             | small                   |
| GI_33695096-S | 100.1  | 102.2  | 100.9  | GPR35    | <a href="#">NM_005301.2</a> | G-protein                            | integral to | G-protein               |
| GI_33695100-A | 133    | 140.7  | 117.6  | OKL38    | <a href="#">NM_182981.1</a> |                                      |             |                         |
| GI_33695100-I | 94.2   | 86.6   | 84     | OKL38    | <a href="#">NM_182981.1</a> |                                      |             |                         |
| GI_33695103-S | 98.3   | 103.1  | 86.9   | GPR65    | <a href="#">NM_003608.2</a> | TDAG8;hTDAG8                         | G-protein   | integral to G-protein   |
| GI_33695106-S | 114.1  | 210.6  | 107.6  | GPR55    | <a href="#">NM_005683.2</a> |                                      | G-protein   | integral to G-protein   |
| GI_33695108-S | 2114   | 1297.6 | 1230.7 | RAB9P40  | <a href="#">NM_005833.2</a> | p40                                  | vesicle     | endosome receptor       |
| GI_33695110-S | 285.3  | 287.6  | 273.8  | PNPT1    | <a href="#">NM_033109.2</a> | OLD35;PNPASE;old-35                  | 3'-5'       | RNA                     |
| GI_33695116-S | 292.4  | 340.6  | 330    | TP53I11  | <a href="#">NM_006034.2</a> | PIG11                                |             | negative                |
| GI_33695118-S | 1005.6 | 1152.1 | 1105.1 | PAPSS1   | <a href="#">NM_005443.3</a> | SK1;PAPSS;ATPSK1                     | ATP         | nucleobas               |
| GI_33695152-I | 76.5   | 81.1   | 71.9   | GNAL     | <a href="#">NM_182978.1</a> |                                      | heterotrim  | peripheral signal       |
| GI_33695154-I | 163.5  | 212.1  | 189.6  | HPN      | <a href="#">NM_182983.1</a> | TMPRSS1                              | serine-     | integral to cell growth |
| GI_33695160-I | 187.4  | 216.5  | 198.6  | GRK4     | <a href="#">NM_182982.1</a> | GPRK4;GPRK2L                         | G-protein-  | regulation              |
| GI_33859667-S | 808.8  | 842.1  | 808.7  | ZNF364   | <a href="#">NM_014455.1</a> | RNF115;CL469780                      |             |                         |
| GI_33859669-S | 131.5  | 127.7  | 125.7  | CHDC1    | <a href="#">NM_015116.1</a> | KIAA1016                             | sugar       | phosphoe                |
| GI_33859677-S | 310.9  | 285.3  | 288.6  | FLJ20557 | <a href="#">NM_017879.1</a> |                                      | nucleic     | nucleus regulation      |
| GI_33859747-S | 279.3  | 284.3  | 315    | MGC2752  | <a href="#">NM_023939.2</a> |                                      |             |                         |
| GI_33859754-S | 102.6  | 108.6  | 123.1  | CXXC6    | <a href="#">NM_030625.1</a> | LCX;TET1;KIAA1676;bA119F7.1          | zinc ion    |                         |
| GI_33859758-S | 331.7  | 413.5  | 357.5  | JPHL1    | <a href="#">NM_032452.1</a> | KIAA1831                             |             | integral to             |
| GI_33859778-S | 727    | 745.6  | 668.2  | MGC33424 | <a href="#">NM_153705.2</a> |                                      |             |                         |
| GI_33859792-S | 2986.8 | 3283.3 | 3078.9 | MGC35261 | <a href="#">NM_173494.1</a> |                                      |             |                         |
| GI_33859820-S | 709.2  | 723.6  | 618.3  | MGC40069 | <a href="#">NM_182615.1</a> |                                      |             |                         |
| GI_33859830-S | 3706.7 | 2454.5 | 2006.1 | RPC62    | <a href="#">NM_006468.4</a> | RPC3                                 | DNA-        | DNA- regulation         |
| GI_33859831-S | 5952.4 | 5656.2 | 4706.8 | SPC18    | <a href="#">NM_014300.2</a> |                                      | peptidase   | microsom proteolysis    |
| GI_33859832-S | 2137   | 2219.1 | 1841.5 | SMBP     | <a href="#">NM_020123.2</a> | EP70-P-iso                           | transporte  | integral to transport   |
| GI_33859834-S | 123.1  | 137.7  | 125.9  | HGF      | <a href="#">NM_000601.3</a> | SF;HPTA                              | hepatocyt   | cellular_co axon        |
| GI_33859836-I | 205.1  | 246.5  | 216.5  | RPP38    | <a href="#">NM_183005.1</a> |                                      | ribonuclea  | nucleolar tRNA          |
| GI_33859842-I | 112.4  | 129    | 111.7  | SHC1     | <a href="#">NM_183001.1</a> | SHC;SHCA                             | transmem    | regulation              |
| GI_33859844-S | 112.1  | 112.6  | 107.4  | ZNF223   | <a href="#">NM_013361.2</a> |                                      | DNA         | nucleus regulation      |
| GI_33859846-S | 204.4  | 300    | 261    | COX7A3   | <a href="#">NM_183003.1</a> | COX7AL2                              | cytochrom   | mitochond electron      |
| GI_33942062-S | 191.2  | 188.9  | 390.9  | SHREW1   | <a href="#">NM_018836.2</a> | MOT8                                 | oxidoredu   | integral to metabolis   |
| GI_33942063-S | 893.7  | 852.7  | 461.2  | SEMA4D   | <a href="#">NM_006378.2</a> | CD100;SEMAJ;coll-4;M-sema G;M-sema-G | receptor    | integral to anti-       |
| GI_33942065-S | 157.1  | 191.5  | 169.7  | SEN8     | <a href="#">NM_145204.2</a> | DEN1;NEDP1;HsT17512                  | cysteine-   | proteolysis             |
| GI_33942071-S | 385.6  | 457.4  | 434.6  | TNRC5    | <a href="#">NM_006586.2</a> | CAG4A;ERDA5                          |             |                         |
| GI_33942075-S | 168.9  | 161.1  | 171.5  | SLC5A8   | <a href="#">NM_145913.2</a> | AIT                                  | transporte  | membran transport       |
| GI_33942079-S | 118.9  | 165.1  | 144.9  | TMC5     | <a href="#">NM_024780.3</a> | FLJ13593                             |             |                         |
| GI_33942082-S | 85     | 87.6   | 92.7   | DUSP21   | <a href="#">NM_022076.2</a> | LMWDSP21                             | protein     | protein                 |
| GI_33943097-S | 726.3  | 1145   | 947.7  | RAB5B    | <a href="#">NM_002868.2</a> |                                      | RAB small   | membran                 |
| GI_33943098-I | 85.6   | 91.3   | 86.3   | SFTP3    | <a href="#">NM_000542.2</a> | SP-B;PSP-B;SFTB3;SFTP3               | surfactant  | extracellul respiratory |
| GI_33943100-S | 115.3  | 104.4  | 95.5   | FLJ32855 | <a href="#">NM_182791.1</a> | FLJ23168;MGC34145                    |             |                         |
| GI_33946268-S | 2230.2 | 1905.3 | 1991.6 | WASL     | <a href="#">NM_003941.2</a> | N-WASP;MGC48327                      | small       | actin actin             |
| GI_33946272-I | 118.4  | 118.1  | 95.4   | PRDM1    | <a href="#">NM_001198.2</a> | BLIMP1;PRDI-BF1                      | tumor       | nucleus cell growth     |
| GI_33946273-A | 141.5  | 139.8  | 106.2  | PRDM1    | <a href="#">NM_182907.1</a> | BLIMP1;PRDI-BF1                      | tumor       | nucleus cell growth     |
| GI_33946273-I | 134.7  | 144.5  | 123.2  | PRDM1    | <a href="#">NM_182907.1</a> | BLIMP1;PRDI-BF1                      | tumor       | nucleus cell growth     |

|               |         |        |        |            |                             |                                        |             |              |             |
|---------------|---------|--------|--------|------------|-----------------------------|----------------------------------------|-------------|--------------|-------------|
| GI_33946275-S | 1272.3  | 755.1  | 637.5  | PSCD3      | <a href="#">NM_004227.3</a> | GRP1;ARNO3                             | phosphati   | membran      | vesicle-    |
| GI_33946276-A | 1198.9  | 1074.4 | 1030.2 | CFL2       | <a href="#">NM_021914.5</a> |                                        | actin       | cytoskelet   |             |
| GI_33946276-I | 129.9   | 123.7  | 126.3  | CFL2       | <a href="#">NM_021914.5</a> |                                        | actin       | cytoskelet   |             |
| GI_33946277-I | 241.8   | 266.5  | 217.9  | CFL2       | <a href="#">NM_138638.1</a> |                                        | actin       | cytoskelet   |             |
| GI_33946279-A | 573.7   | 694.7  | 608.9  | DKFZP434I1 | <a href="#">NM_183009.1</a> | MSTP054                                | nucleic     |              |             |
| GI_33946279-I | 350.2   | 416.4  | 358.8  | DKFZP434I1 | <a href="#">NM_183009.1</a> | MSTP054                                | nucleic     |              |             |
| GI_33946283-I | 197.6   | 160.1  | 189.8  | BIRC3      | <a href="#">NM_001165.3</a> | AIP1;API2;MIHC;CIAP2;HAIP1;HIAP1;RNF49 | apoptosis   | intracellula | anti-       |
| GI_33946284-A | 137     | 114.2  | 137.6  | BIRC3      | <a href="#">NM_182962.1</a> | AIP1;API2;MIHC;CIAP2;HAIP1;HIAP1;RNF49 | apoptosis   | intracellula | anti-       |
| GI_33946286-A | 193.6   | 288.7  | 238.2  | FLJ11383   | <a href="#">NM_024938.2</a> | KIAA0435                               |             |              |             |
| GI_33946286-I | 166.1   | 223.1  | 152.3  | FLJ11383   | <a href="#">NM_024938.2</a> | KIAA0435                               |             |              |             |
| GI_33946288-I | 128.7   | 147.6  | 108.5  | FLJ11383   | <a href="#">NM_014801.2</a> | KIAA0435                               |             |              |             |
| GI_33946290-S | 547.8   | 816.2  | 620.4  | FLJ12443   | <a href="#">NM_024830.3</a> |                                        | acyltransf  |              | metabolis   |
| GI_33946292-I | 85.3    | 88.8   | 85.3   | FLJ20403   | <a href="#">NM_181781.2</a> | MGC61591                               |             |              |             |
| GI_33946294-A | 119.7   | 133.4  | 122.5  | FLJ20403   | <a href="#">NM_182975.1</a> | MGC61591                               |             |              |             |
| GI_33946294-I | 100.8   | 109.2  | 90.9   | FLJ20403   | <a href="#">NM_182975.1</a> | MGC61591                               |             |              |             |
| GI_33946296-I | 118.6   | 140.9  | 115.9  | FLJ20403   | <a href="#">NM_182976.1</a> | MGC61591                               |             |              |             |
| GI_33946298-S | 221.2   | 245.7  | 226.3  | PRPF39     | <a href="#">NM_017922.2</a> | FLJ11128;FLJ20666                      |             |              |             |
| GI_33946300-S | 241.3   | 236.4  | 180.7  | FLJ21062   | <a href="#">NM_024788.2</a> |                                        |             |              |             |
| GI_33946307-A | 132.4   | 128.4  | 117.8  | SLC8A3     | <a href="#">NM_182936.1</a> | NCX3                                   |             |              |             |
| GI_33946307-I | 216.7   | 247.4  | 227    | SLC8A3     | <a href="#">NM_182936.1</a> | NCX3                                   |             |              |             |
| GI_33946309-I | 117.1   | 110.8  | 115.4  | SLC8A3     | <a href="#">NM_033262.3</a> | NCX3                                   |             |              |             |
| GI_33946312-I | 106.2   | 109.3  | 98     | NIN        | <a href="#">NM_016350.3</a> | KIAA1565                               |             |              |             |
| GI_33946314-I | 372     | 413    | 346.8  | NIN        | <a href="#">NM_020921.2</a> | KIAA1565                               |             |              |             |
| GI_33946316-I | 139.5   | 133    | 141.9  | NIN        | <a href="#">NM_182944.1</a> | KIAA1565                               |             |              |             |
| GI_33946318-A | 132.1   | 157.9  | 136.3  | NIN        | <a href="#">NM_182945.1</a> | KIAA1565                               |             |              |             |
| GI_33946322-S | 656.3   | 718.1  | 616.1  | ARL1       | <a href="#">NM_001177.3</a> | ARFL1                                  | enzyme      |              | small       |
| GI_33946323-S | 166     | 165.1  | 167.4  | GNAI1      | <a href="#">NM_002069.4</a> | Gi                                     | heterotrim  | peripheral   | G-protein   |
| GI_33946328-S | 5069.9  | 4454.5 | 2548.4 | RALA       | <a href="#">NM_005402.2</a> | RAL;MGC48949                           | GTP         |              | chemotaxi   |
| GI_33946330-S | 251.4   | 285.5  | 271.8  | SSTR1      | <a href="#">NM_001049.2</a> | SRIF-2                                 | somatosta   | integral to  | negative    |
| GI_33946331-S | 1061.8  | 1211.9 | 1064.3 | WWP1       | <a href="#">NM_007013.3</a> | AIP5;Tiul1;hSDRP1;DKFZp434D2111        | ubiquitin-  | ubiquitin    | central     |
| GI_33946332-I | 966.9   | 1298.5 | 1197.4 | ZC3HAV1    | <a href="#">NM_020119.3</a> | ZAP;FLB6421;ZC3HDC2;FLJ13288;MGC488    |             |              |             |
| GI_33946333-S | 89.1    | 90.8   | 83.9   | FLJ23129   | <a href="#">NM_024763.2</a> |                                        |             |              |             |
| GI_33946335-S | 108.8   | 139.2  | 89.8   | ID2        | <a href="#">NM_002166.4</a> | ID2A;ID2H;MGC26389                     |             | nucleus      | developm    |
| GI_34013511-I | 95.5    | 104.6  | 93.1   | TLX2       | <a href="#">NM_016170.3</a> | Enx;NCX;HOX11L1                        | molecular   | nucleus      | regulation  |
| GI_34013512-S | 2334.8  | 1896.1 | 1471.3 | LSM2       | <a href="#">NM_021177.3</a> | G7b;snRNP;C6orf28;YBL026W              | pre-mRNA    | small        | mRNA        |
| GI_34013527-S | 340.1   | 318.5  | 359    | KIAA1196   | <a href="#">NM_020713.1</a> |                                        | DNA         | nucleus      | regulation  |
| GI_34013529-S | 1600.6  | 1135   | 1061.4 | TMSL3      | <a href="#">NM_183049.1</a> |                                        |             |              |             |
| GI_34013589-S | 940.7   | 840.7  | 555    | ARHGAP22   | <a href="#">NM_021226.2</a> | RhoGAP2                                |             |              |             |
| GI_34098934-S | 1664.7  | 1840.9 | 1721.4 | ATPAF1     | <a href="#">NM_022745.1</a> | ATP11;ATP11p;FLJ22351                  |             |              |             |
| GI_34098936-S | 383.6   | 470.9  | 479    | C19orf6    | <a href="#">NM_033420.2</a> | ASBABP1;MGC4022;R32184_3               |             |              |             |
| GI_34098945-S | 10705.4 | 11380  | 8022.8 | NSEP1      | <a href="#">NM_004559.2</a> | YB1;BP-8;CSDB;DBPB;YB-1;YBX1;NSEP-     | double-     | nucleus      | response    |
| GI_34098958-S | 196.5   | 370.2  | 370.6  | CYP2U1     | <a href="#">NM_183075.1</a> |                                        | monooxyg    |              | electron    |
| GI_34098963-S | 115.4   | 124    | 107.1  | DEFB106    | <a href="#">NM_152251.2</a> | BD-6;DEFB-6                            | antibacteri | extracellul  | xenobiotic  |
| GI_34098964-S | 99.1    | 91     | 94.6   | LY96       | <a href="#">NM_015364.2</a> | MD-2                                   | coreceptor  | plasma       | antibacteri |

|               |        |        |        |            |                             |                                 |  |                                  |
|---------------|--------|--------|--------|------------|-----------------------------|---------------------------------|--|----------------------------------|
| GI_34098967-S | 99.2   | 107    | 96.5   | LOC119180  | <a href="#">NM_183058.1</a> |                                 |  |                                  |
| GI_34098969-S | 114.9  | 128.7  | 117.5  | C1orf36    | <a href="#">NM_183059.1</a> |                                 |  |                                  |
| GI_34101266-A | 653.8  | 553.5  | 607.2  | BCKDHB     | <a href="#">NM_000056.2</a> | E1B                             |  | 3-methyl-2- alpha-               |
| GI_34101267-S | 667.4  | 496.1  | 422    | KLHL8      | <a href="#">NM_020803.3</a> | KIAA1378                        |  | protein                          |
| GI_34101271-I | 291.7  | 324.5  | 392.5  | BCKDHB     | <a href="#">NM_183050.1</a> | E1B                             |  | 3-methyl-2- alpha-               |
| GI_34101273-I | 91     | 90.2   | 82.8   | FLJ32940   | <a href="#">NM_144696.2</a> | FLJ25438                        |  |                                  |
| GI_34101277-A | 127.5  | 138.1  | 149    | MGC10744   | <a href="#">NM_183065.1</a> |                                 |  |                                  |
| GI_34101281-S | 201.3  | 227.5  | 227.3  | SCNN1D     | <a href="#">NM_002978.2</a> | ENaCd;SCNED;ENaCdelta           |  | amiloride- membran sodium        |
| GI_34101287-S | 676.4  | 647.9  | 675.8  | CPSF2      | <a href="#">NM_017437.1</a> | CPSF100;KIAA1367                |  | RNA nucleoplasmic mRNA           |
| GI_34101289-S | 104.5  | 197.9  | 120.9  | FAIM2      | <a href="#">NM_012306.2</a> | LFG;NMP35;KIAA0950;LIFEGUARD    |  |                                  |
| GI_34106705-S | 219.5  | 285.3  | 236.5  | GPC5       | <a href="#">NM_004466.3</a> |                                 |  | glypican proteoglyc developm     |
| GI_34106706-I | 94.4   | 92.8   | 85.4   | BDNF       | <a href="#">NM_170731.2</a> | MGC34632                        |  | growth neurogene                 |
| GI_34106707-I | 94.6   | 93.7   | 91.7   | BDNF       | <a href="#">NM_170732.2</a> | MGC34632                        |  | growth neurogene                 |
| GI_34106708-I | 147.2  | 126.4  | 120.3  | BDNF       | <a href="#">NM_170733.2</a> | MGC34632                        |  | growth neurogene                 |
| GI_34106709-A | 857.5  | 493.9  | 372.1  | BDNF       | <a href="#">NM_170734.2</a> | MGC34632                        |  | growth neurogene                 |
| GI_34106709-I | 104.9  | 108.2  | 96     | BDNF       | <a href="#">NM_170734.2</a> | MGC34632                        |  | growth neurogene                 |
| GI_34106711-I | 127.1  | 139.8  | 124.5  | BDNF       | <a href="#">NM_001709.3</a> | MGC34632                        |  | growth neurogene                 |
| GI_34147050-S | 1586.5 | 1247.1 | 994.4  | PP1665     | <a href="#">NM_030792.4</a> |                                 |  |                                  |
| GI_34147218-S | 1267.7 | 1950.7 | 1730.3 | C14orf112  | <a href="#">NM_016468.3</a> | HSPC203                         |  |                                  |
| GI_34147219-S | 181.1  | 155    | 179.1  | FLJ22965   | <a href="#">NM_022101.2</a> |                                 |  |                                  |
| GI_34147220-S | 1403.4 | 1440.8 | 672.6  | C20orf155  | <a href="#">NM_019095.3</a> | GCD10;dJ967N21.6                |  | transferas integral to phospholi |
| GI_34147320-S | 812.5  | 954.7  | 904.6  | IFI35      | <a href="#">NM_005533.2</a> | IFP35                           |  | transcripti soluble immune       |
| GI_34147321-S | 310.8  | 326.7  | 464.4  | SMPDL3A    | <a href="#">NM_006714.2</a> | ASM3A;ASML3a;FLJ20177;yR36GH4.1 |  | hydrolase carbohydr              |
| GI_34147322-S | 112.3  | 114.7  | 111.7  | MYCL1      | <a href="#">NM_005376.2</a> | LMYC;MYCL                       |  | transcripti nucleus cell growth  |
| GI_34147323-S | 4125.2 | 2478.5 | 1994.7 | SERPINE2   | <a href="#">NM_006216.2</a> | GDN;PI7;PN1;PNI                 |  | serpin extracellul developm      |
| GI_34147324-S | 5616.1 | 7191.5 | 6366.6 | CCT5       | <a href="#">NM_012073.2</a> | KIAA0098                        |  | chaperoni protein                |
| GI_34147325-S | 261.9  | 312.4  | 283.5  | MCLC       | <a href="#">NM_015127.2</a> | KIAA0761                        |  |                                  |
| GI_34147326-S | 1242.6 | 1216.7 | 1146.7 | KIAA0690   | <a href="#">NM_015179.2</a> |                                 |  |                                  |
| GI_34147328-S | 854.8  | 794.2  | 808.3  | DKFZP564O2 | <a href="#">NM_015407.3</a> |                                 |  |                                  |
| GI_34147329-S | 1145.8 | 1122.1 | 993.8  | RRS1       | <a href="#">NM_015169.2</a> | KIAA0112                        |  | DNA nucleus ribosome             |
| GI_34147330-S | 705    | 679.9  | 457.5  | C20orf22   | <a href="#">NM_015600.2</a> | dJ965G21.2;DKFZP434P106         |  |                                  |
| GI_34147331-S | 1733.4 | 1477.8 | 1330.4 | KIAA0409   | <a href="#">NM_015324.2</a> |                                 |  |                                  |
| GI_34147332-S | 395.9  | 413.5  | 532.1  | DKFZP434J0 | <a href="#">NM_015671.2</a> |                                 |  |                                  |
| GI_34147334-S | 1086.4 | 898    | 1081.6 | FLJ20811   | <a href="#">NM_019007.2</a> |                                 |  |                                  |
| GI_34147336-S | 458.2  | 511.6  | 293.3  | ZNF337     | <a href="#">NM_015655.2</a> | dJ694B14.1;DKFZp564F1422        |  | DNA nucleus regulation           |
| GI_34147337-S | 802.4  | 838.2  | 907.8  | KLP1       | <a href="#">NM_020378.2</a> |                                 |  | N-                               |
| GI_34147338-A | 172.7  | 193.1  | 169.4  | NUPL1      | <a href="#">NM_014089.2</a> | PRO2463;KIAA0410                |  | nucleus transport                |
| GI_34147338-I | 89.3   | 101.9  | 93     | NUPL1      | <a href="#">NM_014089.2</a> | PRO2463;KIAA0410                |  | nucleus transport                |
| GI_34147339-S | 184.1  | 208.3  | 182.1  | KIAA1446   | <a href="#">NM_020836.2</a> |                                 |  |                                  |
| GI_34147341-S | 355.6  | 378.2  | 332.3  | KIAA1627   | <a href="#">NM_020961.2</a> |                                 |  | DNA nucleus regulation           |
| GI_34147342-S | 195.7  | 322.6  | 215.2  | IGSF9      | <a href="#">NM_020789.2</a> | Nrt1;KIAA1355                   |  |                                  |
| GI_34147343-S | 1829.9 | 2002.7 | 1601.5 | KIAA1533   | <a href="#">NM_020895.2</a> |                                 |  |                                  |
| GI_34147344-S | 2111.4 | 2859.7 | 2209.2 | KCTD14     | <a href="#">NM_023930.2</a> | MGC2376                         |  | voltage- membran potassium       |
| GI_34147348-S | 112.5  | 138.6  | 128.3  | MGC2474    | <a href="#">NM_023931.2</a> |                                 |  |                                  |



|               |         |        |        |           |                             |                                   |            |               |                         |
|---------------|---------|--------|--------|-----------|-----------------------------|-----------------------------------|------------|---------------|-------------------------|
| GI_34147349-S | 448.8   | 496.3  | 511.5  | MGC2601   | <a href="#">NM_024042.2</a> | c380A1.2                          |            |               |                         |
| GI_34147350-S | 122.8   | 129    | 135.9  | MGC2827   | <a href="#">NM_023940.2</a> | MGC4499                           | small      |               | small                   |
| GI_34147351-S | 132.7   | 141.1  | 132.7  | MGC8407   | <a href="#">NM_024046.2</a> |                                   |            |               |                         |
| GI_34147352-S | 1987.4  | 1916   | 1944.1 | MGC2803   | <a href="#">NM_024038.2</a> |                                   | DNA        | nucleus       | regulation              |
| GI_34147353-S | 954.1   | 960.7  | 837    | C7orf24   | <a href="#">NM_024051.2</a> | MGC3077;FLJ11717                  |            |               |                         |
| GI_34147354-S | 360.9   | 312    | 283.3  | MGC3101   | <a href="#">NM_024043.2</a> | FLJ12582                          |            |               |                         |
| GI_34147355-S | 583.1   | 710.7  | 693.9  | MGC2731   | <a href="#">NM_024068.2</a> |                                   |            |               |                         |
| GI_34147356-S | 451.7   | 695.2  | 689.4  | MGC2594   | <a href="#">NM_024050.2</a> |                                   |            |               |                         |
| GI_34147357-S | 775     | 788    | 920.6  | MGC2747   | <a href="#">NM_024104.2</a> |                                   |            |               |                         |
| GI_34147358-S | 584.8   | 646.9  | 658.2  | PDCL3     | <a href="#">NM_024065.2</a> | PDCL2;VIAF1;GCPHLP;HTPHLP;MGC3062 |            |               | phototrans              |
| GI_34147359-S | 331.2   | 475.5  | 393.2  | C9orf16   | <a href="#">NM_024112.2</a> | MGC4639;EST00098;FLJ12823         | molecular  | kinesin       | biological_             |
| GI_34147360-S | 903.1   | 987.4  | 991.4  | MGC2749   | <a href="#">NM_024069.2</a> |                                   |            |               |                         |
| GI_34147361-S | 155.5   | 179.1  | 149.9  | TRIM48    | <a href="#">NM_024114.2</a> | RNF101;MGC4827                    | zinc ion   |               | intracellular           |
| GI_34147362-S | 5131.9  | 2665.4 | 993.1  | MGC4504   | <a href="#">NM_024111.2</a> |                                   |            |               |                         |
| GI_34147363-S | 658     | 782.8  | 672    | MGC4825   | <a href="#">NM_024122.2</a> |                                   |            |               |                         |
| GI_34147364-S | 490.7   | 699.2  | 533    | MGC4707   | <a href="#">NM_024113.2</a> | FLJ22210                          |            |               |                         |
| GI_34147365-S | 533.7   | 803.9  | 971.2  | MGC1203   | <a href="#">NM_024296.2</a> |                                   |            |               |                         |
| GI_34147366-S | 2269.5  | 2388.5 | 2272   | MAPKAP1   | <a href="#">NM_024117.2</a> | SIN1;MGC2745                      | Ras        |               | cellular_co biological_ |
| GI_34147367-S | 855     | 780.9  | 694.9  | CHCHD7    | <a href="#">NM_024300.2</a> | MGC2217                           |            |               |                         |
| GI_34147369-S | 527.9   | 528.3  | 484.3  | TNIP2     | <a href="#">NM_024309.2</a> | KLIP;FLIP1;ABIN-2;MGC4289         |            |               |                         |
| GI_34147371-S | 10725.6 | 10946  | 12110  | C20orf149 | <a href="#">NM_024299.2</a> | MGC2479;FLJ21046;dJ697K14.9       | DNA        | nucleus       | regulation              |
| GI_34147373-S | 263.4   | 288    | 351.9  | MGC4172   | <a href="#">NM_024308.2</a> | FLJ22543                          | oxidoredu  |               | metabolis               |
| GI_34147374-S | 927.2   | 665.5  | 577.4  | C7orf23   | <a href="#">NM_024315.2</a> | MGC4175                           |            |               | integral to             |
| GI_34147375-S | 227.6   | 232.1  | 241.3  | ET        | <a href="#">NM_024311.2</a> |                                   |            |               |                         |
| GI_34147376-S | 124.9   | 137.7  | 135.7  | MGC11242  | <a href="#">NM_024320.2</a> |                                   |            |               |                         |
| GI_34147377-S | 527.2   | 705.2  | 1077.3 | MGC4294   | <a href="#">NM_024314.2</a> |                                   |            |               |                         |
| GI_34147378-S | 386.4   | 299.6  | 335.4  | C1orf35   | <a href="#">NM_024319.2</a> | MMTAG2;MGC4174                    |            |               |                         |
| GI_34147379-S | 428.1   | 494.7  | 528.1  | C20orf121 | <a href="#">NM_024331.2</a> | MGC2470;dJ179M20.3                | transporte | intracellular | transport               |
| GI_34147380-S | 146.3   | 123.7  | 125.6  | CYP2R1    | <a href="#">NM_024514.2</a> | MGC4663                           |            |               |                         |
| GI_34147381-S | 272.7   | 325.2  | 280.9  | MGC4645   | <a href="#">NM_024515.2</a> |                                   |            |               |                         |
| GI_34147385-S | 945     | 1071.2 | 1206.9 | PCNT1     | <a href="#">NM_024844.2</a> | PCN;PCNT                          |            |               |                         |
| GI_34147386-S | 115.4   | 115.7  | 97.7   | EFHD1     | <a href="#">NM_025202.2</a> | PP3051;FLJ13612                   | calcium    |               |                         |
| GI_34147387-S | 213.6   | 243.5  | 224.3  | C2orf8    | <a href="#">NM_025264.2</a> | MGC2454                           |            |               |                         |
| GI_34147388-S | 669.9   | 598.2  | 541.9  | MGC2744   | <a href="#">NM_025267.2</a> |                                   | ATP        |               | alanyl-                 |
| GI_34147389-S | 290.4   | 311    | 248.1  | MGC4659   | <a href="#">NM_025268.2</a> |                                   |            |               |                         |
| GI_34147390-S | 355.4   | 483.4  | 480.7  | MGC4093   | <a href="#">NM_030578.2</a> |                                   |            |               |                         |
| GI_34147391-S | 1672.8  | 1456.7 | 1359.2 | MGC10471  | <a href="#">NM_030818.2</a> |                                   |            |               |                         |
| GI_34147392-S | 115.6   | 111.3  | 113.2  | MGC10731  | <a href="#">NM_030907.2</a> |                                   | GTP        |               | small                   |
| GI_34147394-S | 183.2   | 224.1  | 215.2  | MXD3      | <a href="#">NM_031300.2</a> | MAD3;MGC2383                      |            |               |                         |
| GI_34147395-S | 899.4   | 733.9  | 843.9  | MGC4293   | <a href="#">NM_031304.2</a> |                                   |            |               | phycobilis              |
| GI_34147396-S | 112.5   | 125.1  | 106.3  | AKR1CL2   | <a href="#">NM_031436.2</a> | LoopADR;MGC10612                  |            |               |                         |
| GI_34147397-S | 1262.2  | 1173.4 | 1259.6 | CCM2      | <a href="#">NM_031443.2</a> | C7orf22;MGC4067;MGC4607           |            |               |                         |
| GI_34147398-S | 1259.8  | 1089.3 | 1218.9 | C19orf12  | <a href="#">NM_031448.2</a> | MGC10922;DKFZP762D096             |            |               |                         |
| GI_34147399-S | 1311.8  | 1309.7 | 1326.9 | C6orf119  | <a href="#">NM_031452.2</a> | MGC2560;dJ427A4.2                 |            |               |                         |

|               |        |        |        |            |                             |                     |            |                         |
|---------------|--------|--------|--------|------------|-----------------------------|---------------------|------------|-------------------------|
| GI_34147400-S | 126.7  | 164.9  | 137.9  | RPS6KL1    | <a href="#">NM_031464.2</a> | MGC11287            | structural | protein                 |
| GI_34147401-S | 735.7  | 950.1  | 787.7  | MGC11134   | <a href="#">NM_031472.2</a> |                     | transferas | tRNA                    |
| GI_34147402-A | 181.1  | 221.1  | 193.3  | CDV-1      | <a href="#">NM_031473.2</a> | CDV1;CDV1R;MGC4027  |            |                         |
| GI_34147402-I | 125    | 151.3  | 137    | CDV-1      | <a href="#">NM_031473.2</a> | CDV1;CDV1R;MGC4027  |            |                         |
| GI_34147405-S | 135.4  | 141.2  | 138.7  | KATNAL1    | <a href="#">NM_032116.2</a> | MGC2599             | nucleotide |                         |
| GI_34147407-S | 1659.1 | 1549.6 | 1547.7 | DKFZp586C1 | <a href="#">NM_032273.2</a> |                     |            |                         |
| GI_34147410-S | 2053   | 1871.9 | 1580.3 | MGC2714    | <a href="#">NM_032299.2</a> |                     |            |                         |
| GI_34147411-S | 815.9  | 820.3  | 819.3  | CHCHD5     | <a href="#">NM_032309.2</a> | C2orf9;MGC11104     |            |                         |
| GI_34147412-S | 608.7  | 742.4  | 587.2  | MGC11061   | <a href="#">NM_032312.2</a> |                     |            |                         |
| GI_34147413-S | 1099.1 | 1022   | 830.5  | C4orf14    | <a href="#">NM_032313.2</a> | MGC3232             |            |                         |
| GI_34147414-S | 792.8  | 921    | 647.8  | MGC4618    | <a href="#">NM_032326.2</a> |                     |            |                         |
| GI_34147419-S | 992.2  | 871.5  | 891.2  | ACBD6      | <a href="#">NM_032360.2</a> | MGC2404             | acyl-CoA   |                         |
| GI_34147420-S | 838.3  | 737    | 783.1  | MGC13272   | <a href="#">NM_032355.2</a> |                     |            |                         |
| GI_34147421-S | 102.6  | 106.1  | 106.1  | MGC16186   | <a href="#">NM_032372.2</a> |                     | metallope  | electron                |
| GI_34147422-S | 1355.1 | 1042.3 | 1058.8 | MGC4308    | <a href="#">NM_032359.2</a> |                     |            |                         |
| GI_34147424-A | 951.6  | 778.3  | 670.8  | MGC15416   | <a href="#">NM_032371.2</a> |                     |            |                         |
| GI_34147425-S | 103.3  | 117.5  | 103.9  | MGC2629    | <a href="#">NM_032522.2</a> |                     | protein    |                         |
| GI_34147426-S | 1412.8 | 1850.6 | 2123.2 | MGC3248    | <a href="#">NM_032486.2</a> |                     |            |                         |
| GI_34147427-S | 87.8   | 91.3   | 84.1   | FAPP2      | <a href="#">NM_032639.2</a> | MGC3358             |            |                         |
| GI_34147428-S | 106.2  | 100.4  | 100.7  | SLC30A2    | <a href="#">NM_032513.2</a> | ZNT2;ZnT-2;MGC11303 | cation     | membran cation          |
| GI_34147429-S | 126.3  | 137.5  | 114.8  | MGC10701   | <a href="#">NM_032658.2</a> |                     |            |                         |
| GI_34147430-S | 2901.3 | 1894.2 | 2248.9 | NIFIE14    | <a href="#">NM_032635.2</a> | MGC1936             |            |                         |
| GI_34147431-S | 120.5  | 122.4  | 135.1  | MGC4266    | <a href="#">NM_032680.2</a> |                     | calcium    |                         |
| GI_34147433-S | 354    | 377.5  | 311.2  | MGC12760   | <a href="#">NM_032723.2</a> |                     |            |                         |
| GI_34147434-S | 239.3  | 235.2  | 221    | USP30      | <a href="#">NM_032663.2</a> | FLJ40511;MGC10702   | cysteine-  | ubiquitin-              |
| GI_34147435-S | 137.4  | 208.4  | 107.1  | C9orf67    | <a href="#">NM_032728.2</a> | FLJ14662;MGC12921   |            |                         |
| GI_34147439-S | 216.8  | 311.9  | 246.2  | PLCD4      | <a href="#">NM_032726.2</a> | MGC12837            | calcium    | lipid                   |
| GI_34147440-S | 234.1  | 291.3  | 260.1  | MGC16075   | <a href="#">NM_032761.2</a> |                     |            |                         |
| GI_34147441-S | 314.1  | 230.3  | 176.6  | MGC16121   | <a href="#">NM_032762.2</a> |                     |            |                         |
| GI_34147442-S | 150.2  | 145.7  | 148.4  | MGC16153   | <a href="#">NM_032764.2</a> |                     |            |                         |
| GI_34147443-S | 551.8  | 719.7  | 622.2  | TRIM52     | <a href="#">NM_032765.2</a> | RNF102;MGC16175     | zinc ion   | intracellula            |
| GI_34147444-S | 510    | 656.2  | 611.3  | MGC14126   | <a href="#">NM_032898.2</a> |                     |            |                         |
| GI_34147445-S | 155.1  | 191.2  | 173.9  | MGC14128   | <a href="#">NM_032899.2</a> |                     |            |                         |
| GI_34147446-S | 3263.8 | 3748.6 | 3284.5 | MGC14288   | <a href="#">NM_032901.2</a> |                     |            |                         |
| GI_34147447-S | 118.6  | 126.8  | 122.3  | MGC14425   | <a href="#">NM_032903.2</a> |                     |            |                         |
| GI_34147448-S | 534.9  | 558.4  | 692    | RTN4IP1    | <a href="#">NM_032730.2</a> | NIMP;MGC12934       | alcohol    |                         |
| GI_34147449-S | 3973.6 | 3895   | 3678.4 | MGC14156   | <a href="#">NM_032906.2</a> |                     |            |                         |
| GI_34147452-S | 261.9  | 261.5  | 192.1  | LOC87769   | <a href="#">NM_033110.1</a> |                     |            |                         |
| GI_34147454-S | 511.1  | 558.5  | 491.5  | RBM18      | <a href="#">NM_033117.2</a> | MGC2734             | nucleic    |                         |
| GI_34147455-S | 535.8  | 638.4  | 701.1  | MGC16169   | <a href="#">NM_033115.2</a> | HSPC302             |            |                         |
| GI_34147457-S | 262.5  | 251.2  | 272    | LOC90355   | <a href="#">NM_033211.2</a> |                     |            |                         |
| GI_34147458-S | 104.8  | 106.4  | 122.9  | MGC13138   | <a href="#">NM_033410.2</a> |                     | nucleic    | intracellula regulation |
| GI_34147459-S | 700.3  | 607.9  | 449    | MGC10992   | <a href="#">NM_033212.2</a> | MGC13119            |            |                         |
| GI_34147460-S | 982.8  | 869.7  | 1126.1 | PP1201     | <a href="#">NM_022152.3</a> |                     |            |                         |

|               |        |        |        |          |                             |                                    |             |             |              |        |
|---------------|--------|--------|--------|----------|-----------------------------|------------------------------------|-------------|-------------|--------------|--------|
| GI_34147461-S | 5298.2 | 4338.3 | 4295.3 | ZPR9     | <a href="#">NM_033414.2</a> | MGC2485;MGC17552                   | RNA         | nucleus     |              |        |
| GI_34147462-S | 98     | 128.5  | 127.3  | MGC16309 | <a href="#">NM_033413.2</a> | FLJ23553                           |             |             |              |        |
| GI_34147463-S | 110.5  | 118.9  | 116.7  | C20orf54 | <a href="#">NM_033409.2</a> | MGC10698;bA371L19.1                |             |             | integral to  |        |
| GI_34147465-S | 2176.1 | 2534.2 | 2592.3 | FLJ22875 | <a href="#">NM_032231.3</a> |                                    |             |             |              |        |
| GI_34147466-S | 774    | 753.7  | 664    | BCLP     | <a href="#">NM_033504.2</a> | CAC-1                              |             |             |              |        |
| GI_34147467-S | 105.6  | 238.7  | 140.2  | JM11     | <a href="#">NM_033626.2</a> |                                    |             |             |              |        |
| GI_34147468-S | 3274.1 | 3102.8 | 4580.2 | WDR34    | <a href="#">NM_052844.2</a> | MGC20486;bA216B9.3                 |             |             |              |        |
| GI_34147469-S | 244    | 251.6  | 263.6  | MGC15396 | <a href="#">NM_052855.2</a> |                                    |             |             |              |        |
| GI_34147470-S | 270.3  | 313.4  | 338.5  | MGC10485 | <a href="#">NM_052875.2</a> |                                    | protein     | cytosol     | intracellula |        |
| GI_34147471-S | 743.4  | 1153.9 | 987.1  | MGC20781 | <a href="#">NM_052935.2</a> | MGC21375                           |             |             |              |        |
| GI_34147473-S | 179.3  | 224.3  | 198.7  | MGC16491 | <a href="#">NM_052943.2</a> | MGC20845                           |             |             |              |        |
| GI_34147474-S | 101    | 89.9   | 81.7   | NOSTRIN  | <a href="#">NM_052946.2</a> | MGC20702                           |             |             | intracellula | signal |
| GI_34147475-S | 116.5  | 155.8  | 117.3  | MGC16384 | <a href="#">NM_053048.2</a> |                                    |             |             |              |        |
| GI_34147476-S | 345    | 397.8  | 348.6  | ZNF307   | <a href="#">NM_019110.3</a> | P1P373C6;p373c6.1                  |             |             |              |        |
| GI_34147477-S | 250.5  | 267.3  | 282.6  | MGC15397 | <a href="#">NM_080652.2</a> |                                    |             |             |              |        |
| GI_34147481-S | 309    | 262.7  | 348.3  | CDCA5    | <a href="#">NM_080668.2</a> | MGC16386                           |             |             |              |        |
| GI_34147483-S | 499.4  | 273.8  | 289.3  | MGC4562  | <a href="#">NM_133375.2</a> |                                    | ribonuclea  |             |              |        |
| GI_34147484-S | 346.7  | 299.8  | 284.5  | PACSIN3  | <a href="#">NM_016223.3</a> |                                    | cytoskelet  | kinesin     | endocytosi   |        |
| GI_34147485-S | 1038   | 756.6  | 761.9  | SAT2     | <a href="#">NM_133491.2</a> | SSAT2                              | N-          |             |              |        |
| GI_34147486-A | 932.3  | 1228.6 | 1051.9 | C21orf80 | <a href="#">NM_133635.2</a> | KIAA0958;DKFZp434E171              |             |             |              |        |
| GI_34147489-S | 483.7  | 585.9  | 495.8  | NDUFC2   | <a href="#">NM_004549.3</a> | B14.5b                             | NADH        | NADH        |              |        |
| GI_34147490-S | 2720.2 | 2678.9 | 2578.3 | APG3     | <a href="#">NM_022488.3</a> | PC3-                               |             |             |              |        |
| GI_34147491-S | 1207.6 | 1292.7 | 1272   | STX3A    | <a href="#">NM_004177.3</a> |                                    | protein     | kinesin     | nonselecti   |        |
| GI_34147492-S | 905.4  | 1075.8 | 1037.8 | EIF2S1   | <a href="#">NM_004094.3</a> | EIF2;EIF-2;EIF2A;EIF-2A;EIF-2alpha | translation | polysome    | regulation   |        |
| GI_34147493-S | 5215.9 | 2916.9 | 3021.4 | MAT2A    | <a href="#">NM_005911.3</a> | MATA2;MATII;SAMS2                  | methionin   |             | one-         |        |
| GI_34147494-S | 113.5  | 125.7  | 104.8  | SERPINB9 | <a href="#">NM_004155.3</a> | PI9;CAP3;CAP-3                     | protein     | cytosol     |              |        |
| GI_34147496-S | 91.1   | 103.3  | 93.9   | MYCN     | <a href="#">NM_005378.3</a> | NMYC                               | transcripti | chromatin   | oncogene     |        |
| GI_34147497-S | 393.5  | 355.9  | 343.7  | FLJ20533 | <a href="#">NM_017866.3</a> |                                    |             |             |              |        |
| GI_34147499-S | 1138.2 | 1398.9 | 1147.4 | PPP1R2   | <a href="#">NM_006241.3</a> | IPP2                               | type 1      |             | energy       |        |
| GI_34147501-S | 829.2  | 689.5  | 501.9  | NEK6     | <a href="#">NM_014397.3</a> | SID6-1512                          | protein-    |             | protein      |        |
| GI_34147502-S | 130.3  | 126.4  | 138.7  | ZNF71    | <a href="#">NM_021216.3</a> | EZFIT                              | DNA         | nucleus     | regulation   |        |
| GI_34147505-S | 188.2  | 188    | 267.9  | RPS6KA2  | <a href="#">NM_021135.3</a> | RSK;HU-2;RSK3;MAPKAPK1C            | protein     | nucleus     | protein      |        |
| GI_34147506-S | 380    | 459.1  | 441.7  | FLJ22955 | <a href="#">NM_024819.3</a> |                                    |             |             |              |        |
| GI_34147508-S | 274    | 207.8  | 215.3  | FKSG28   | <a href="#">NM_030929.3</a> | FKSG40;bA108L7.1                   |             |             |              |        |
| GI_34147509-S | 241    | 282.2  | 254.4  | FLJ21839 | <a href="#">NM_021831.3</a> |                                    |             |             |              |        |
| GI_34147510-S | 119.5  | 138.5  | 120.9  | C1QTNF2  | <a href="#">NM_031908.3</a> | CTRP2;zacrp2                       | DNA         | microfibril | regulation   |        |
| GI_34147511-S | 636.7  | 623.5  | 524.5  | MYOHD1   | <a href="#">NM_025109.3</a> | FLJ22865                           | ATP         | myosin      |              |        |
| GI_34147514-S | 2559.8 | 2189.7 | 1915.3 | PYGO2    | <a href="#">NM_138300.2</a> | FLJ33226                           | DNA         | nucleus     | regulation   |        |
| GI_34147515-S | 2590.3 | 1414.9 | 1139.7 | UAP1     | <a href="#">NM_003115.3</a> | AgX;AGX1;SPAG2                     | UDP-N-      |             | UDP-N-       |        |
| GI_34147516-S | 1669.4 | 1494.4 | 1268.2 | CSNK1A1  | <a href="#">NM_001892.3</a> | CK1;HLCDGP1;PRO2975                | casein      |             | protein      |        |
| GI_34147517-S | 111.2  | 134.1  | 115.4  | TOSO     | <a href="#">NM_005449.3</a> |                                    | apoptosis   | nucleus     | anti-        |        |
| GI_34147519-S | 221.8  | 271.9  | 259.2  | STX6     | <a href="#">NM_005819.3</a> |                                    | vesicle     | endosome    | nonselecti   |        |
| GI_34147520-S | 528.6  | 490.3  | 526.2  | NOC4     | <a href="#">NM_006067.3</a> | C16orf4                            | molecular   | cytoplasm   |              |        |
| GI_34147521-S | 1081.4 | 1197.3 | 985.7  | CABC1    | <a href="#">NM_020247.3</a> |                                    | chaperone   | mitochond   |              |        |

|               |         |        |        |           |                             |                             |             |              |             |
|---------------|---------|--------|--------|-----------|-----------------------------|-----------------------------|-------------|--------------|-------------|
| GI_34147523-S | 259.1   | 341.6  | 332.6  | SKD3      | <a href="#">NM_030813.3</a> |                             | nucleotide  |              |             |
| GI_34147524-S | 277.9   | 207.5  | 161.3  | C20orf55  | <a href="#">NM_031424.3</a> | MGC4675;bA371L19.3          | DNA         | nucleus      | regulation  |
| GI_34147525-S | 234.7   | 220.7  | 225.2  | ZNF551    | <a href="#">NM_138347.2</a> |                             | nucleic     | nucleus      | regulation  |
| GI_34147526-S | 239.8   | 266.5  | 341    | LOC90313  | <a href="#">NM_138349.2</a> |                             |             |              |             |
| GI_34147528-S | 647.6   | 546.5  | 441    | LOC91272  | <a href="#">NM_138369.1</a> |                             |             |              |             |
| GI_34147531-S | 124.7   | 138.1  | 130.5  | MYLC2PL   | <a href="#">NM_138403.2</a> | PLRLC                       | calcium     |              |             |
| GI_34147533-S | 144.6   | 159.3  | 164.7  | RDH13     | <a href="#">NM_138412.2</a> |                             | oxidoredu   |              | metabolis   |
| GI_34147534-S | 113.7   | 103.8  | 97.6   | LOC112937 | <a href="#">NM_138416.1</a> |                             | beta-       | beta-        | carbohydr   |
| GI_34147536-S | 2786    | 3316   | 2050.1 | GRCC10    | <a href="#">NM_138425.2</a> |                             |             |              |             |
| GI_34147537-S | 877.7   | 2041.6 | 1997.2 | SDSL      | <a href="#">NM_138432.2</a> | SDS-RS1                     | lyase       |              | amino       |
| GI_34147538-S | 1764.1  | 1634.4 | 1191.4 | LOC114926 | <a href="#">NM_138436.2</a> |                             |             |              |             |
| GI_34147539-S | 988.7   | 1025.8 | 1084.2 | LOC114984 | <a href="#">NM_138439.1</a> |                             |             |              |             |
| GI_34147541-S | 3315.7  | 3423.2 | 3488.8 | LOC115098 | <a href="#">NM_138442.2</a> |                             |             |              |             |
| GI_34147542-S | 522.4   | 510.7  | 490.5  | CCDC5     | <a href="#">NM_138443.2</a> | HEI-C;HsT1461               |             |              |             |
| GI_34147543-S | 639.6   | 639.3  | 813    | LOC115509 | <a href="#">NM_138447.1</a> |                             | nucleic     | intracellula | regulation  |
| GI_34147545-S | 125.9   | 129    | 120.9  | RAB3C     | <a href="#">NM_138453.2</a> |                             | GTP         |              | small       |
| GI_34147546-S | 1437.5  | 1135.9 | 776.4  | CTHRC1    | <a href="#">NM_138455.2</a> |                             |             |              |             |
| GI_34147547-S | 1363.7  | 1898.7 | 1588.1 | C6orf68   | <a href="#">NM_138459.2</a> | MGC:7199                    |             |              |             |
| GI_34147548-S | 300.6   | 338.8  | 333.5  | LOC116238 | <a href="#">NM_138463.2</a> |                             |             |              |             |
| GI_34147549-A | 113.5   | 137.2  | 126    | HSU84971  | <a href="#">NM_138490.1</a> | VG5Q;FLJ10283;HUS84971      |             |              |             |
| GI_34147551-S | 1955.4  | 2614.8 | 2551.8 | EIF5A     | <a href="#">NM_001970.3</a> | EIF-5A;EIF5A1               | translation | cytoplasm    | viral       |
| GI_34147553-S | 983.1   | 1375.4 | 1118.5 | RAB9A     | <a href="#">NM_004251.3</a> | RAB9                        | RAB small   | Golgi        | nonselecti  |
| GI_34147554-S | 212.8   | 294.2  | 330.2  | MPZL1     | <a href="#">NM_003953.3</a> | PZR                         | protein     | integral to  | transmem    |
| GI_34147555-S | 1214.7  | 1340.6 | 1194.9 | MADH4     | <a href="#">NM_005359.3</a> | JIP;DPC4;SMAD4              | transcripti | cytoplasm    | SMAD        |
| GI_34147556-S | 4945    | 5458.4 | 5101   | NDUFS2    | <a href="#">NM_004550.3</a> |                             | iron-sulfur | NADH         | mitochond   |
| GI_34147557-S | 99.4    | 112.8  | 107.6  | LYL1      | <a href="#">NM_005583.3</a> |                             | DNA         | nucleus      | oncogene    |
| GI_34147559-S | 12102.3 | 13007  | 10750  | DDOST     | <a href="#">NM_005216.3</a> | OST;OST48;KIAA0115          | dolichyl-   | endoplas     | N-linked    |
| GI_34147560-S | 258.6   | 315    | 272.4  | HSPB7     | <a href="#">NM_014424.3</a> | cvHSP                       | protein C-  |              | regulation  |
| GI_34147561-S | 186.5   | 210.8  | 125    | SMO       | <a href="#">NM_005631.3</a> | Gx;SMOH                     | protein     | integral to  | cell growth |
| GI_34147562-S | 426.5   | 411.2  | 412.7  | FLJ11126  | <a href="#">NM_018332.3</a> |                             |             |              |             |
| GI_34147563-S | 136.5   | 128.9  | 137.2  | SLC1A7    | <a href="#">NM_006671.3</a> | AAAT;EAAT5                  |             |              |             |
| GI_34147565-S | 113.2   | 119.5  | 109.4  | SREB3     | <a href="#">NM_018969.3</a> |                             | G-protein   | integral to  | signal      |
| GI_34147566-S | 2581.1  | 2774   | 2400.9 | GUK1      | <a href="#">NM_000858.3</a> | GMK                         | guanylate   |              | GTP         |
| GI_34147567-S | 1803.1  | 1534.6 | 1401.4 | RAP1GDS1  | <a href="#">NM_021159.3</a> | GDS1                        | GTPase      | cellular_co  | biological_ |
| GI_34147571-S | 2761.6  | 2496.8 | 673.2  | ISG20     | <a href="#">NM_002201.4</a> | HEM45                       | exonuclea   | nucleoplas   | cell        |
| GI_34147572-S | 1127.5  | 1159.3 | 1250   | SF3A1     | <a href="#">NM_005877.3</a> | PRP21;SAP114;SF3A120        | pre-mRNA    | spliceoso    | mRNA        |
| GI_34147573-S | 23636   | 22715  | 21881  | ITGB5     | <a href="#">NM_002213.3</a> |                             | cell        | integrin     | cell-matrix |
| GI_34147574-S | 247.1   | 252.7  | 243.4  | HTATIP2   | <a href="#">NM_006410.3</a> | CC3;TIP30                   | protein     | nucleus      | induction   |
| GI_34147575-S | 237.6   | 421.2  | 199.5  | NK4       | <a href="#">NM_004221.3</a> |                             | cell        | extracellul  | cell        |
| GI_34147576-S | 101.5   | 131.9  | 127.2  | RPIP8     | <a href="#">NM_006695.3</a> |                             | small       |              | small       |
| GI_34147577-S | 225.8   | 233.9  | 237.7  | NR2F1     | <a href="#">NM_005654.3</a> | EAR3;EAR-                   | ligand-     | nucleus      | signal      |
| GI_34147578-S | 401.9   | 327.1  | 356.6  | PISD      | <a href="#">NM_014338.3</a> | PSSC;DJ858B16;DKFZP566G2246 | phosphati   |              | phospholi   |
| GI_34147579-S | 2280.2  | 2659.4 | 3028   | RRAGA     | <a href="#">NM_006570.3</a> | RAGA;FIP-1                  | GTP         | peripheral   | cell death  |
| GI_34147580-S | 1112.4  | 861.4  | 934.5  | ZSIG11    | <a href="#">NM_015926.3</a> | SIG11                       |             |              |             |

|               |         |        |        |            |                             |                                      |             |              |              |
|---------------|---------|--------|--------|------------|-----------------------------|--------------------------------------|-------------|--------------|--------------|
| GI_34147581-S | 128.7   | 344.6  | 298.7  | ZAP128     | <a href="#">NM_006821.3</a> | PTE2                                 | serine      | peroxisom    | acyl-CoA     |
| GI_34147582-S | 254.3   | 270.8  | 264.7  | FLJ20291   | <a href="#">NM_017748.3</a> |                                      |             |              |              |
| GI_34147584-S | 939     | 995.1  | 1032.8 | DMAP1      | <a href="#">NM_019100.3</a> | DNMAP1;DNMTAP1;FLJ11543;KIAA1425     | DNA         | kinesin      | DNA          |
| GI_34147585-S | 4101.6  | 4916.5 | 4557.1 | ANAPC5     | <a href="#">NM_016237.3</a> | APC5;PDL-108                         | ubiquitin-  | anaphase-    | mitotic      |
| GI_34147586-S | 683.7   | 778.4  | 824    | MOSPD3     | <a href="#">NM_023948.3</a> | CDS3;AF053356_CDS3                   | structural  |              |              |
| GI_34147587-S | 1102.7  | 549.6  | 757.7  | FLJ20647   | <a href="#">NM_017918.3</a> |                                      |             |              |              |
| GI_34147589-S | 127.6   | 132.3  | 132.5  | LOC56901   | <a href="#">NM_020142.3</a> | NUOMS                                |             |              |              |
| GI_34147590-S | 1951.6  | 1389.6 | 1276.3 | PUS1       | <a href="#">NM_025215.3</a> |                                      | pseudouri   | nucleus      | tRNA         |
| GI_34147591-S | 257     | 311.7  | 251.7  | MGC3262    | <a href="#">NM_024029.3</a> |                                      |             |              |              |
| GI_34147593-S | 2385.4  | 1990.9 | 1805.9 | MUS81      | <a href="#">NM_025128.3</a> | FLJ21012                             | endonucle   | intracellula | DNA          |
| GI_34147595-S | 195.1   | 248.2  | 267.2  | CDCA3      | <a href="#">NM_031299.3</a> | GRCC8;TOME-1;MGC2577                 | molecular   | cellular_co  | biological_  |
| GI_34147598-S | 158.6   | 167.5  | 159.5  | FCER2      | <a href="#">NM_002002.3</a> | CD23;FCE2;CD23A;IGEBF                | integrin    | integral to  | heterophili  |
| GI_34147599-S | 5165.6  | 4035   | 3616.8 | CD99       | <a href="#">NM_002414.3</a> | MIC2;MIC2X;MIC2Y                     | cell        | proteoglyc   | cell         |
| GI_34147600-S | 417.3   | 415.3  | 273.5  | PGF        | <a href="#">NM_002632.3</a> | PLGF;PIGF-2                          | growth      | membran      | positive     |
| GI_34147601-S | 1916    | 2138.2 | 2173.6 | ARHGDI     | <a href="#">NM_004309.3</a> | GDIA1;RHOGDI                         | Rho GDP-    | cytoplasm    | negative     |
| GI_34147602-S | 432.2   | 422.2  | 392.1  | BCS1L      | <a href="#">NM_004328.3</a> | BCS;BCS1;FLNMS;h-                    | adenosine   | respiratory  | energy       |
| GI_34147603-S | 1681.5  | 1793.5 | 1802.3 | STX4A      | <a href="#">NM_004604.3</a> | p35-2                                | protein     | membran      | intracellula |
| GI_34147604-S | 2775.7  | 2716.9 | 2470.9 | OPTN       | <a href="#">NM_021980.3</a> | NRP;FIP2;HIP7;HYPL;GLC1E;TFIIIA-INTP |             | cytoplasm    | pathogene    |
| GI_34147605-S | 974.8   | 1221.5 | 1110.5 | SLC25A10   | <a href="#">NM_012140.3</a> | DIC                                  | dicarboxyli | mitochond    | dicarboxyli  |
| GI_34147606-S | 470     | 367.9  | 422.2  | CGI-57     | <a href="#">NM_015680.3</a> |                                      |             |              |              |
| GI_34147607-S | 2297.6  | 2923.8 | 2325   | NOSIP      | <a href="#">NM_015953.3</a> | CGI-25                               |             |              |              |
| GI_34147608-S | 256.9   | 299.6  | 266.2  | FLJ20519   | <a href="#">NM_017860.3</a> |                                      |             |              |              |
| GI_34147611-S | 1091.2  | 1498.3 | 1239.3 | SUV39H2    | <a href="#">NM_024670.3</a> | FLJ23414                             | methyltran  | chromatin    | chromatin    |
| GI_34147613-S | 967.8   | 1016   | 775    | OBFC1      | <a href="#">NM_024928.3</a> | FLJ22559;bA541N10.2                  | nucleic     |              |              |
| GI_34147614-S | 382.9   | 445    | 423.2  | FLJ22688   | <a href="#">NM_025129.3</a> |                                      |             |              |              |
| GI_34147615-S | 314.1   | 383.6  | 392.4  | DKFZP434I2 | <a href="#">NM_031478.3</a> |                                      |             |              |              |
| GI_34147616-S | 4165.2  | 4117.3 | 3503.7 | ASC1p100   | <a href="#">NM_032204.3</a> | FLJ21588;DKFZp586O0223               |             |              |              |
| GI_34147617-S | 311.4   | 328.5  | 315.2  | LOC132001  | <a href="#">NM_138807.2</a> |                                      |             |              |              |
| GI_34147618-S | 92.5    | 94.2   | 96.2   | C9orf65    | <a href="#">NM_138818.2</a> |                                      |             |              |              |
| GI_34147619-S | 2038.5  | 1528.9 | 1057.2 | EHD4       | <a href="#">NM_139265.2</a> |                                      | nucleic     | nucleus      |              |
| GI_34147620-A | 1613.5  | 1524.8 | 1488.3 | AMPD2      | <a href="#">NM_139156.1</a> |                                      | AMP         | cellular_co  | purine       |
| GI_34147620-I | 122.5   | 128.1  | 135.2  | AMPD2      | <a href="#">NM_139156.1</a> |                                      | AMP         | cellular_co  | purine       |
| GI_34147622-S | 809.4   | 653.5  | 661.2  | RPA2       | <a href="#">NM_002946.3</a> | REPA2                                | single-     | DNA          | DNA          |
| GI_34147623-S | 2650.4  | 1959.2 | 1577.4 | SORD       | <a href="#">NM_003104.3</a> | SORD1                                | alcohol     |              | sorbitol     |
| GI_34147624-S | 128.9   | 167.9  | 176.4  | SIX2       | <a href="#">NM_016932.3</a> |                                      | transcripti | nucleus      | embryoge     |
| GI_34147625-S | 758.3   | 561.1  | 662.7  | DUSP22     | <a href="#">NM_020185.3</a> | JKAP;JSP1;MKPX                       | tumor       |              | inactivatio  |
| GI_34147626-S | 105.8   | 97.9   | 83.3   | FLJ12895   | <a href="#">NM_023926.3</a> |                                      |             |              |              |
| GI_34147627-S | 1742.6  | 1059   | 902.6  | HSPBAP1    | <a href="#">NM_024610.3</a> | PASS1;FLJ22623                       |             |              |              |
| GI_34147628-S | 88.2    | 92.4   | 84.1   | PROX1      | <a href="#">NM_002763.3</a> |                                      | specific    | nucleus      | ectoderm     |
| GI_34147629-S | 10511.7 | 11226  | 10570  | TUFM       | <a href="#">NM_003321.3</a> | EFTU;EF-TuMT                         | translation | mitochond    | translation  |
| GI_34147631-S | 4585.2  | 4814.2 | 4229.8 | ZYX        | <a href="#">NM_003461.3</a> |                                      | cell        | focal        | cell         |
| GI_34147632-S | 426.2   | 444.6  | 494.1  | PLK1       | <a href="#">NM_005030.3</a> | STPK13                               | protein     | nucleus      | mitosis      |
| GI_34147633-S | 515.1   | 580.7  | 539.6  | SLC12A4    | <a href="#">NM_005072.3</a> | KCC1                                 | potassium   | integral to  | regulation   |
| GI_34147634-S | 720.3   | 711.9  | 693.3  | CHERP      | <a href="#">NM_006387.4</a> | DAN16;SCAF6                          |             |              | pathogene    |

|               |        |        |        |           |                             |                                  |              |              |             |
|---------------|--------|--------|--------|-----------|-----------------------------|----------------------------------|--------------|--------------|-------------|
| GI_34147635-S | 812.7  | 938.7  | 885.4  | CBX1      | <a href="#">NM_006807.3</a> | CBX;M31;MOD1;HP1-BETA;HP1Hs-beta | chromatin    | nucleoplas   | chromatin   |
| GI_34147639-S | 562.3  | 562.8  | 454    | FLJ20399  | <a href="#">NM_017803.3</a> |                                  | double-      | intracellula |             |
| GI_34147640-S | 391.5  | 470.8  | 413.3  | ELAC2     | <a href="#">NM_018127.4</a> | ELC2;HPC2;FLJ10530               |              |              |             |
| GI_34147641-S | 979.8  | 982.9  | 1116.2 | MGC10433  | <a href="#">NM_024321.3</a> |                                  |              |              |             |
| GI_34147642-S | 228.6  | 256.1  | 236.7  | FLJ14166  | <a href="#">NM_024565.3</a> |                                  |              |              |             |
| GI_34147643-S | 132.7  | 337.6  | 128.5  | SERPINA5  | <a href="#">NM_000624.3</a> | PCI;PAI3;PROCI;PLANH3            | serpin       |              |             |
| GI_34147645-S | 2334.7 | 2674.3 | 2322.3 | PLOD3     | <a href="#">NM_001084.3</a> | LH3                              | procollage   | membran      | protein     |
| GI_34147646-S | 2825.6 | 2153.8 | 1519.6 | FHL1      | <a href="#">NM_001449.3</a> | KYO-T;SLIM1                      | molecular    | cellular_co  | muscle      |
| GI_34147647-S | 311.8  | 356.9  | 352.5  | PDZK1     | <a href="#">NM_002614.3</a> | CAP70;CLAMP;PDZD1                | transporte   |              | small       |
| GI_34147648-S | 186.2  | 213.3  | 177.4  | TLE2      | <a href="#">NM_003260.3</a> | ESG;ESG2                         |              | nucleus      | histogene   |
| GI_34147649-S | 741.3  | 830.7  | 788.5  | SLC25A11  | <a href="#">NM_003562.3</a> | OGC;SLC20A4                      | oxoglutara   | mitochond    | small       |
| GI_34147650-S | 501.8  | 635.7  | 539.6  | MKNK1     | <a href="#">NM_003684.3</a> | MNK1                             | protein      |              | signal      |
| GI_34147651-S | 151.8  | 172.4  | 174.2  | DLK1      | <a href="#">NM_003836.3</a> | FA1;ZOG;pG2;PREF1;Pref-1         | structural   | secretory    | developm    |
| GI_34147652-S | 233.6  | 293.1  | 238.6  | NOL3      | <a href="#">NM_003946.3</a> | ARC;MYC;NOP;NOP30                | apoptosis    | cytosol      | anti-       |
| GI_34147653-S | 3111.7 | 2164.4 | 1408.4 | SLC3A2    | <a href="#">NM_002394.3</a> | 4F2;CD98;MDU1;4F2HC;NACAE        | amino        | integral to  | amino       |
| GI_34147654-S | 290.7  | 591.7  | 694.8  | RAB3A     | <a href="#">NM_002866.3</a> |                                  | RAB small    | synaptic     | neurotran   |
| GI_34147655-S | 88.9   | 92.5   | 84.6   | SYK       | <a href="#">NM_003177.3</a> |                                  | protein-     |              | protein     |
| GI_34147656-S | 619.3  | 540    | 446.4  | ZNF76     | <a href="#">NM_003427.3</a> | ZNF523;Zfp523;D6S229E            | transcripti  | nucleus      | regulation  |
| GI_34147657-S | 2817.2 | 745.5  | 524.1  | DDIT3     | <a href="#">NM_004083.3</a> | CHOP;CEBPZ;CHOP10;GADD153        | transcripti  | nucleus      | response    |
| GI_34147658-S | 135.5  | 171.7  | 157.1  | UCHL1     | <a href="#">NM_004181.3</a> | PARK5;PGP9.5                     | ubiquitin    | intracellula | ubiquitin-  |
| GI_34147659-S | 467    | 494.6  | 434.2  | PPP3CC    | <a href="#">NM_005605.3</a> | CALNA3                           |              | calcineurin  |             |
| GI_34147660-S | 1609.2 | 1683.7 | 1609.1 | SFRS4     | <a href="#">NM_005626.3</a> | SRP75                            | pre-mRNA     | nucleus      | mRNA        |
| GI_34147661-S | 529.1  | 633.2  | 478.9  | TFCP2     | <a href="#">NM_005653.3</a> | CP2;LSF;LBP-1C;TFCP2C            | DNA          |              | regulation  |
| GI_34147662-S | 288.1  | 359    | 343.7  | HRBL      | <a href="#">NM_006076.3</a> | RABR                             | DNA          | mitochond    |             |
| GI_34147663-S | 2253.3 | 2748.7 | 2615.4 | TFG       | <a href="#">NM_006070.3</a> | TF6                              | molecular    | cellular_co  | biological_ |
| GI_34147664-S | 165.8  | 186.6  | 170.1  | RGS14     | <a href="#">NM_006480.3</a> |                                  | GTPase       | peripheral   | regulation  |
| GI_34147665-S | 2694   | 2570.1 | 2379.1 | STK25     | <a href="#">NM_006374.3</a> | SOK1;YSK1                        | protein      |              | response    |
| GI_34147667-S | 3463.5 | 2822.1 | 3532   | TFDP1     | <a href="#">NM_007111.3</a> | DP1;Dp-1;DRTF1                   | transcripti  | transcripti  | regulation  |
| GI_34147668-S | 174.3  | 227.6  | 224.3  | CTXL      | <a href="#">NM_014312.3</a> | CTH                              | antigen      | membran      |             |
| GI_34147669-S | 872.3  | 1027.3 | 995.7  | SLC39A1   | <a href="#">NM_014437.3</a> | ZIP1;ZIRTL                       | di-, tri-    | integral to  | di-, tri-   |
| GI_34147670-S | 103.2  | 156.9  | 127.8  | RAB30     | <a href="#">NM_014488.3</a> |                                  | RAB small    | Golgi        | protein     |
| GI_34147671-S | 607.6  | 607    | 654.7  | HTATSF1   | <a href="#">NM_014500.3</a> | TAT-SF1;dJ196E23.2               | transcripti  | nucleus      | viral       |
| GI_34147672-S | 569.7  | 614.5  | 636.9  | ST6GALNAC | <a href="#">NM_013443.3</a> | ST6GALNACVI                      | sialyltransf | integral to  | glycosphin  |
| GI_34147673-S | 727.3  | 907.1  | 1182.4 | ACAD9     | <a href="#">NM_014049.3</a> | ACAD-9;NPD002;MGC14452           |              |              |             |
| GI_34147674-S | 378.2  | 246.4  | 195.2  | STXBP6    | <a href="#">NM_014178.5</a> | amisyn;HSPC156                   |              |              |             |
| GI_34147675-S | 891.3  | 730.3  | 650.3  | CGI-12    | <a href="#">NM_015942.3</a> |                                  |              |              |             |
| GI_34147677-S | 4860.2 | 4241.7 | 4002   | LOC51035  | <a href="#">NM_015853.3</a> |                                  |              |              |             |
| GI_34147678-S | 139.3  | 126.7  | 127.1  | HOOK1     | <a href="#">NM_015888.3</a> | HK1                              |              |              | nonselecti  |
| GI_34147679-S | 1239.6 | 1130   | 793.2  | TGFB111   | <a href="#">NM_015927.3</a> | HIC5;ARA55;HIC-5;TSC-5           | protein      | focal        | negative    |
| GI_34147682-S | 1788.2 | 1961.9 | 1972   | RNPC4     | <a href="#">NM_018107.3</a> | FLJ10482                         | RNA          | nucleus      |             |
| GI_34147683-S | 552.4  | 665.5  | 923.5  | C10orf3   | <a href="#">NM_018131.3</a> | FLJ10540                         |              |              |             |
| GI_34147684-S | 163.1  | 137    | 158.8  | HES6      | <a href="#">NM_018645.3</a> |                                  | transcripti  |              | regulation  |
| GI_34147685-S | 547.4  | 609    | 364.2  | ABHD6     | <a href="#">NM_020676.3</a> |                                  |              |              |             |
| GI_34147686-S | 116.3  | 114.3  | 112.3  | MGC20741  | <a href="#">NM_018561.3</a> |                                  | cysteine-    |              | ubiquitin-  |

|               |        |        |        |           |                             |                                          |             |              |             |
|---------------|--------|--------|--------|-----------|-----------------------------|------------------------------------------|-------------|--------------|-------------|
| GI_34147687-S | 256.1  | 245.1  | 330.4  | FLJ22318  | <a href="#">NM_022762.3</a> | DKFZp434K0926                            |             |              |             |
| GI_34147689-S | 107.4  | 132.4  | 99.2   | FLJ22457  | <a href="#">NM_024901.3</a> |                                          |             |              |             |
| GI_34147690-S | 185.7  | 223.6  | 210    | FLJ22582  | <a href="#">NM_025045.3</a> |                                          |             |              |             |
| GI_34147691-S | 484.8  | 570.2  | 587.1  | Lin10     | <a href="#">NM_025187.3</a> | FLJ12076                                 |             |              |             |
| GI_34147692-S | 149.7  | 163.9  | 146.2  | PLA2G12A  | <a href="#">NM_030821.3</a> |                                          | calcium-    | cellular_co  | biological_ |
| GI_34147693-S | 8821.3 | 8560.1 | 7685.5 | FLJ21977  | <a href="#">NM_032213.3</a> |                                          |             |              |             |
| GI_34147695-S | 1369.1 | 1080.2 | 924.4  | C6orf93   | <a href="#">NM_032860.3</a> | FLJ14909;dJ468K18.4                      |             |              |             |
| GI_34147697-S | 1487.4 | 1608.8 | 1285.6 | C14orf32  | <a href="#">NM_144578.2</a> | MISS;MGC23138;c14_5346                   |             |              |             |
| GI_34147700-S | 238.3  | 218.2  | 243.1  | MGC23280  | <a href="#">NM_144683.2</a> |                                          | oxidoredu   |              | metabolis   |
| GI_34147701-S | 436.1  | 528.7  | 509.4  | MGC29762  | <a href="#">NM_144706.2</a> |                                          |             |              |             |
| GI_34147703-S | 363.1  | 455.7  | 562.3  | MGC20806  | <a href="#">NM_144999.2</a> |                                          |             |              |             |
| GI_34147704-S | 4349.8 | 4499.3 | 2295.9 | HMG1      | <a href="#">NM_004965.4</a> | HMG14                                    | positive    | chromatin    |             |
| GI_34147705-S | 1379.6 | 1633.5 | 1277.7 | MGC16703  | <a href="#">NM_145042.2</a> |                                          | GTP         | microtubul   | microtubul  |
| GI_34147709-S | 91     | 102.5  | 78.9   | MGC4734   | <a href="#">NM_145051.2</a> | FLJ31197                                 |             |              |             |
| GI_34147710-S | 248.2  | 182.2  | 199    | C13orf3   | <a href="#">NM_145061.2</a> | RAMA1;MGC4832                            |             |              |             |
| GI_34147711-S | 942.7  | 804.5  | 758.7  | C6orf130  | <a href="#">NM_145063.2</a> | MGC19570;dJ34B21.3                       |             |              |             |
| GI_34147712-S | 499.4  | 356.7  | 407    | TLE1      | <a href="#">NM_005077.3</a> | ESG;ESG1;GRG1                            |             | nucleus      | histogene   |
| GI_34147713-S | 98.8   | 124.7  | 106.3  | LOC90589  | <a href="#">NM_145233.2</a> |                                          |             | nucleus      |             |
| GI_34147714-S | 109.7  | 118.4  | 95.6   | CHRD1     | <a href="#">NM_145234.2</a> | CHL;VOPT;NRLN1;dA141H5.1                 |             |              | developm    |
| GI_34147716-S | 92.5   | 77.6   | 79.8   | ZNF31     | <a href="#">NM_145238.2</a> | KOX29;ZFP-31                             | DNA         | nucleus      | regulation  |
| GI_34147718-S | 240.6  | 290.3  | 314.5  | LOC146542 | <a href="#">NM_145271.2</a> | MGC13138                                 | nucleic     | intracellula | regulation  |
| GI_34147719-S | 137.2  | 146.7  | 128.4  | C7orf33   | <a href="#">NM_145304.2</a> |                                          |             |              |             |
| GI_34147720-S | 95.9   | 102.2  | 98.1   | LOC220070 | <a href="#">NM_145308.2</a> |                                          |             |              |             |
| GI_34147721-S | 154.6  | 129.6  | 141.4  | ZNF485    | <a href="#">NM_145312.2</a> |                                          | nucleic     | nucleus      | regulation  |
| GI_34147722-S | 593.8  | 499.9  | 847    | KIFC2     | <a href="#">NM_145754.2</a> |                                          | ATP         | microtubul   | microtubul  |
| GI_34147725-A | 2550.6 | 3493.2 | 2107.7 | SHC1      | <a href="#">NM_003029.3</a> | SHC;SHCA                                 | transmem    |              | regulation  |
| GI_34147725-I | 147.9  | 152.3  | 133.6  | SHC1      | <a href="#">NM_003029.3</a> | SHC;SHCA                                 | transmem    |              | regulation  |
| GI_34147726-S | 183.5  | 194    | 176.5  | TOB3      | <a href="#">NM_031921.3</a> | KIAA1273                                 | nucleotide  |              |             |
| GI_34170263-I | 142.9  | 159.4  | 156.7  | BDNF      | <a href="#">NM_170735.3</a> | MGC34632                                 | growth      |              | neurogene   |
| GI_34222089-S | 107.2  | 95.5   | 86.3   | KCNJ13    | <a href="#">NM_002242.2</a> | KIR1.4;KIR7.1;MGC33328                   | voltage-    | voltage-     | potassium   |
| GI_34222090-S | 64.5   | 71.4   | 59.7   | PIWIL1    | <a href="#">NM_004764.2</a> | HIWI;PIWI                                |             |              | female      |
| GI_34222091-S | 267.7  | 322.5  | 204.7  | IFIT2     | <a href="#">NM_001547.3</a> | G10P2;IFI54;cig42;IFI-54;GARG-39;ISG-54K | molecular   | cellular_co  | immune      |
| GI_34222093-S | 1235.9 | 1481.4 | 1056.3 | ELF1      | <a href="#">NM_172373.2</a> |                                          | transcripti | nucleus      | regulation  |
| GI_34222094-S | 240.6  | 449.5  | 172.9  | LTB4DH    | <a href="#">NM_012212.2</a> | MGC34943                                 | catalytic   | cytoplasm    | leukotrien  |
| GI_34222095-S | 2050.4 | 2111.1 | 1918   | UBXD2     | <a href="#">NM_014607.2</a> | UBXDC1;KIAA0242                          | transcripti |              | regulation  |
| GI_34222096-S | 247.3  | 225.1  | 251.7  | KIAA0089  | <a href="#">NM_015141.2</a> |                                          | glycerol-3- | glycerol-3-  | carbohydr   |
| GI_34222097-S | 259.6  | 292    | 283    | KIAA0759  | <a href="#">NM_015305.2</a> |                                          |             |              |             |
| GI_34222098-S | 914.3  | 1081.7 | 822.1  | KIAA0252  | <a href="#">NM_015138.2</a> |                                          |             |              |             |
| GI_34222099-S | 287.7  | 271.9  | 219.9  | PLCL2     | <a href="#">NM_015184.2</a> | PLCE2;KIAA1092                           | phosphoin   |              | lipid       |
| GI_34222100-S | 3672.5 | 3593.6 | 3185.7 | KIAA1068  | <a href="#">NM_015332.2</a> |                                          |             |              |             |
| GI_34222103-S | 147.8  | 171.5  | 135.6  | C20orf26  | <a href="#">NM_015585.2</a> | DKFZP434K156                             | transporte  | membran      | transport   |
| GI_34222105-S | 154.6  | 166.4  | 182.6  | SAMD4     | <a href="#">NM_015589.2</a> | KIAA1053;DKFZp434H0350                   |             |              |             |
| GI_34222107-S | 684.7  | 966    | 842.1  | STK36     | <a href="#">NM_015690.2</a> | FU;KIAA1278;DKFZp434N0223                | ATP         |              | protein     |
| GI_34222109-I | 243.7  | 264.4  | 296.9  | MDM1      | <a href="#">NM_017440.2</a> |                                          |             |              |             |

|               |        |        |        |            |                             |                                  |             |              |              |
|---------------|--------|--------|--------|------------|-----------------------------|----------------------------------|-------------|--------------|--------------|
| GI_34222111-S | 149.7  | 132.9  | 126.3  | DKFZp547C1 | <a href="#">NM_018712.2</a> |                                  |             |              |              |
| GI_34222113-S | 345.9  | 471.2  | 248.6  | KIAA1434   | <a href="#">NM_019593.2</a> | FLJ11085;MGC26147                |             |              |              |
| GI_34222114-S | 122.7  | 133.5  | 135.2  | DKFZp566D2 | <a href="#">NM_020116.2</a> |                                  | calcium     |              |              |
| GI_34222115-S | 1705.5 | 1778.8 | 1664   | TDE2       | <a href="#">NM_020755.2</a> | TDE1L;TMS-2;KIAA1253             |             | integral to  |              |
| GI_34222116-S | 132.9  | 126.8  | 114.7  | HACE1      | <a href="#">NM_020771.2</a> | KIAA1320                         | ubiquitin-  | intracellula | ubiquitin    |
| GI_34222117-S | 253.4  | 296    | 245.2  | WDR35      | <a href="#">NM_020779.2</a> | KIAA1336;MGC33196                |             |              |              |
| GI_34222118-S | 100.3  | 104.3  | 91     | SYT4       | <a href="#">NM_020783.2</a> | HsT1192;KIAA1342                 | transporte  | synaptic     | transport    |
| GI_34222119-S | 1319.2 | 1396.6 | 1307.7 | ZBTB4      | <a href="#">NM_020899.2</a> | KAISO-L1;KIAA1538                | protein     |              |              |
| GI_34222120-S | 3168   | 2753.3 | 2568.9 | Nup37      | <a href="#">NM_024057.2</a> | MGC5585;FLJ22618                 | protein     | nucleus      | intracellula |
| GI_34222122-S | 300    | 270    | 287.5  | DKFZP566NC | <a href="#">NM_030923.2</a> | DC29                             |             |              |              |
| GI_34222123-S | 364.9  | 428.7  | 519.5  | MGC13183   | <a href="#">NM_032358.2</a> |                                  |             |              |              |
| GI_34222124-S | 302.9  | 369.5  | 302.3  | C9orf59    | <a href="#">NM_033387.2</a> | FLJ00024                         |             |              |              |
| GI_34222125-S | 528.2  | 567.7  | 593    | RWDD2      | <a href="#">NM_033411.2</a> | MGC13523;dJ747H23.2              | acylphosp   |              |              |
| GI_34222126-S | 304.9  | 669.1  | 262.8  | MGC17330   | <a href="#">NM_052880.2</a> |                                  |             |              |              |
| GI_34222128-S | 356    | 360.3  | 279.4  | SSFA2      | <a href="#">NM_006751.3</a> | CS1;CS-1;KRAP;SPAG13;KIAA1927    |             | plasma       |              |
| GI_34222129-S | 1216.1 | 1473.3 | 1443.7 | RAB18      | <a href="#">NM_021252.3</a> |                                  | GTP         | cellular_co  | small        |
| GI_34222130-S | 138.7  | 153.5  | 139    | LOC142937  | <a href="#">NM_138470.2</a> |                                  |             |              |              |
| GI_34222132-S | 1957.6 | 2351.6 | 2164.7 | TXNDC      | <a href="#">NM_030755.3</a> | TMX;TXNDC1;DKFZP564E1962         | electron    |              | electron     |
| GI_34222134-S | 93.3   | 96.5   | 99.3   | NMU2R      | <a href="#">NM_020167.3</a> | FM4                              | G-protein   | integral to  | neuropepti   |
| GI_34222135-S | 268.2  | 585.8  | 413.5  | A4GALT     | <a href="#">NM_017436.3</a> | P;P1;PK;A14GALT                  | galactosylt | Golgi        | galactosyl   |
| GI_34222136-S | 299.1  | 287.7  | 297.8  | LOC93081   | <a href="#">NM_138779.2</a> |                                  | catalytic   |              |              |
| GI_34222139-S | 1686.6 | 1396.3 | 1961.8 | SLC17A5    | <a href="#">NM_012434.3</a> | SD;AST;NSD;SLD;ISSD;SIASD;SIALIN | hydrogen:   | lysosomal    | anion        |
| GI_34222140-S | 202    | 240.3  | 210.9  | C19orf22   | <a href="#">NM_138774.2</a> | MGC16353                         |             |              |              |
| GI_34222142-S | 752.5  | 796.7  | 792.3  | C9orf12    | <a href="#">NM_022755.3</a> | INSP5K2;FLJ13163                 | kinase      |              |              |
| GI_34222144-S | 501.4  | 404.5  | 387.4  | LOC91689   | <a href="#">NM_033318.3</a> |                                  |             |              |              |
| GI_34222146-S | 209.6  | 245.2  | 204.5  | TGFBRAP1   | <a href="#">NM_004257.3</a> | TRAP1;TRAP-1                     |             |              | TGFbeta      |
| GI_34222147-S | 98.9   | 106.2  | 87.5   | C1QTNF7    | <a href="#">NM_031911.3</a> | CTRP7;ZACRP7                     |             | microfibril  |              |
| GI_34222148-S | 170.5  | 218.1  | 230.4  | KBTBD7     | <a href="#">NM_032138.3</a> | DKFZP434E2318                    | protein     |              |              |
| GI_34222150-S | 148.9  | 169.4  | 151.1  | CNN1       | <a href="#">NM_001299.3</a> | SMCC;Sm-Calp                     | actin       | cytoskelet   | muscle       |
| GI_34222151-S | 316.2  | 376.4  | 334.6  | SLC30A4    | <a href="#">NM_013309.3</a> | ZNT4                             | zinc ion    | endosome     | zinc ion     |
| GI_34222152-S | 118.6  | 135.2  | 105.2  | VSNL1      | <a href="#">NM_003385.3</a> | VILIP;HPCAL3                     | calcium     |              | central      |
| GI_34222153-S | 186.5  | 214.8  | 197.5  | ZMYND12    | <a href="#">NM_032257.3</a> | DKFZp434N2435                    |             |              |              |
| GI_34222154-S | 626.2  | 689.3  | 613.7  | SLC20A2    | <a href="#">NM_006749.3</a> | GLVR2;MLVAR;PIT-2;Glv-2          | sodium:ph   | membran      | small        |
| GI_34222155-S | 527    | 519.8  | 411    | SLC30A3    | <a href="#">NM_003459.3</a> | ZNT3                             | zinc porter | endosome     | small        |
| GI_34222156-S | 356.4  | 406.2  | 366.4  | HLC-8      | <a href="#">NM_017941.3</a> | FLJ20721                         |             |              |              |
| GI_34222157-S | 253.2  | 309.2  | 284.6  | CD164      | <a href="#">NM_006016.3</a> | MGC-24;MUC-24                    | cell        | soluble      | negative     |
| GI_34222158-S | 468.7  | 829    | 1040.9 | FLJ10925   | <a href="#">NM_018275.3</a> |                                  |             |              |              |
| GI_34222159-S | 931.6  | 791.7  | 953.6  | ELL2       | <a href="#">NM_012081.3</a> |                                  | RNA         | transcripti  | RNA          |
| GI_34222160-S | 126.8  | 154.2  | 130.4  | SPAG4L     | <a href="#">NM_080675.3</a> | TSARG4;MGC33594;dJ726C3.1        |             | kinesin      |              |
| GI_34222163-S | 98.3   | 92.2   | 95.4   | MGC26768   | <a href="#">NM_144634.2</a> |                                  | lysozyme    | extracellul  | cell wall    |
| GI_34222164-S | 144.1  | 126.2  | 151.3  | ZNF502     | <a href="#">NM_033210.3</a> | FLJ12515;FLJ14855                |             |              |              |
| GI_34222165-S | 182.5  | 191.3  | 181.9  | ZDHHC19    | <a href="#">NM_144637.2</a> | MGC33345                         | sugar       |              |              |
| GI_34222166-S | 100.8  | 120.4  | 106.9  | MGC26610   | <a href="#">NM_144647.2</a> |                                  | calcium     |              |              |
| GI_34222168-S | 86.9   | 89.7   | 92.3   | MGC33371   | <a href="#">NM_144664.2</a> |                                  |             |              |              |



|               |        |        |        |           |                             |                                  |                    |                      |
|---------------|--------|--------|--------|-----------|-----------------------------|----------------------------------|--------------------|----------------------|
| GI_34222169-S | 195.3  | 234.3  | 203.3  | MGC27019  | <a href="#">NM_144705.2</a> |                                  | microtubul         | microtubul           |
| GI_34222170-S | 91.5   | 93.4   | 85.5   | C10orf82  | <a href="#">NM_144661.2</a> | MGC33547                         |                    |                      |
| GI_34222172-S | 130.4  | 159.4  | 151.8  | MGC33630  | <a href="#">NM_144668.2</a> |                                  |                    |                      |
| GI_34222173-S | 181.9  | 187.6  | 158.5  | FLJ32743  | <a href="#">NM_145020.2</a> |                                  |                    |                      |
| GI_34222174-S | 330.8  | 257.1  | 292.9  | MGC22679  | <a href="#">NM_144711.2</a> |                                  |                    |                      |
| GI_34222175-S | 213    | 218.2  | 216.6  | C6orf199  | <a href="#">NM_145025.2</a> | MGC26954;dJ70A9.1                | ATP                |                      |
| GI_34222176-S | 122.1  | 149.3  | 127.7  | MGC27016  | <a href="#">NM_144979.2</a> |                                  | nucleic            |                      |
| GI_34222178-S | 144.7  | 166.7  | 133.8  | MGC29898  | <a href="#">NM_145048.2</a> |                                  |                    |                      |
| GI_34222179-S | 115.4  | 119.2  | 98.2   | C6orf102  | <a href="#">NM_145027.2</a> | MGC33317;dJ137F1.4;dJ188D3.1     |                    |                      |
| GI_34222180-S | 94     | 103    | 93.9   | LOC127540 | <a href="#">NM_145205.2</a> | dJ1007G16.5                      | DNA                | chromatin regulation |
| GI_34222181-S | 98.2   | 96.1   | 102.4  | CALR3     | <a href="#">NM_145046.2</a> | CRT2;FLJ25355;MGC26577           | calcium            | endoplas             |
| GI_34222182-S | 200    | 258.6  | 204.1  | DDIT4L    | <a href="#">NM_145244.2</a> | REDD2;Rtp801L                    |                    |                      |
| GI_34222183-S | 105.5  | 108.1  | 108.2  | MGC33182  | <a href="#">NM_145203.2</a> |                                  | protein-           | protein              |
| GI_34222184-S | 511.6  | 499.8  | 489    | LOC133957 | <a href="#">NM_145265.2</a> |                                  |                    |                      |
| GI_34222185-S | 94.9   | 129.4  | 107.4  | FANK1     | <a href="#">NM_145235.2</a> |                                  |                    |                      |
| GI_34222187-S | 474.8  | 383.3  | 343.6  | MOBK12C   | <a href="#">NM_145279.2</a> | MOB3C;MGC26743                   |                    |                      |
| GI_34222188-S | 134.5  | 158.4  | 131.8  | STYX      | <a href="#">NM_145251.2</a> |                                  | protein            | protein              |
| GI_34222189-S | 90.3   | 90.5   | 90.1   | LOC137392 | <a href="#">NM_145269.2</a> |                                  |                    |                      |
| GI_34222190-S | 116.8  | 131.6  | 121.1  | NOXO1     | <a href="#">NM_144603.2</a> | P41NOX;P41NOXA;P41NOXB;P41NOXC;M |                    | intracellula         |
| GI_34222191-S | 97     | 108.5  | 89.6   | GALNT15   | <a href="#">NM_145292.2</a> |                                  |                    |                      |
| GI_34222192-S | 1257.7 | 1380.8 | 1122.2 | PRPF4     | <a href="#">NM_004697.3</a> | PRP4;HPRP4;Prp4p;HPRP4P          | pre-mRNA spliceoso | RNA                  |
| GI_34222193-S | 401.4  | 431.2  | 336    | FLJ10613  | <a href="#">NM_019067.3</a> |                                  | peptidase membran  | proteolysis          |
| GI_34222195-S | 1007   | 893.3  | 988.5  | FLJ10511  | <a href="#">NM_018120.3</a> |                                  | metal ion          | metal ion            |
| GI_34222196-S | 235.2  | 270.4  | 245.9  | SLC16A7   | <a href="#">NM_004731.3</a> | MCT2                             | pyruvate membran   | pyruvate             |
| GI_34222197-S | 804.4  | 810.7  | 435.6  | C10orf22  | <a href="#">NM_032804.4</a> | FLJ14547                         |                    |                      |
| GI_34222198-S | 1374.4 | 937.8  | 587.9  | LRRC5     | <a href="#">NM_018103.3</a> | FLJ10470                         |                    |                      |
| GI_34222200-S | 142.5  | 178.2  | 204.7  | MGC10204  | <a href="#">NM_153329.2</a> |                                  | oxidoredu          | metabolis            |
| GI_34222201-S | 625    | 805.1  | 865.8  | ZNF503    | <a href="#">NM_032772.3</a> | MGC2555;FLJ45745                 |                    |                      |
| GI_34222202-S | 419.2  | 469.4  | 456.1  | CRI2      | <a href="#">NM_153232.2</a> | EID2;EID-2;MGC20452              | carboxype          | proteolysis          |
| GI_34222204-S | 489.8  | 485.4  | 384.4  | AEBP2     | <a href="#">NM_153207.2</a> | MGC17922                         |                    |                      |
| GI_34222205-S | 274.2  | 313.9  | 270.6  | MGC33486  | <a href="#">NM_153266.2</a> |                                  |                    |                      |
| GI_34222206-S | 137.5  | 126.8  | 126.5  | MGC34034  | <a href="#">NM_153224.2</a> |                                  |                    |                      |
| GI_34222207-S | 184.7  | 146.1  | 263.5  | MGC33974  | <a href="#">NM_153350.2</a> |                                  | receptor           |                      |
| GI_34222208-S | 88.4   | 93.2   | 83.4   | MGC26143  | <a href="#">NM_153243.2</a> |                                  |                    |                      |
| GI_34222210-S | 96.8   | 92.3   | 88.7   | TCBA1     | <a href="#">NM_153355.2</a> | MGC41924                         |                    |                      |
| GI_34222211-S | 125.1  | 129.2  | 131.1  | MGC33653  | <a href="#">NM_153346.2</a> |                                  |                    |                      |
| GI_34222212-S | 235    | 181.1  | 99.9   | EVER1     | <a href="#">NM_007267.5</a> | EV1;TMC6;EVIN1;LAK-4P            |                    |                      |
| GI_34222213-S | 299.4  | 310.8  | 319    | MGC33214  | <a href="#">NM_153354.2</a> |                                  |                    |                      |
| GI_34222214-S | 188.3  | 240.8  | 216.7  | CLDN7     | <a href="#">NM_001307.3</a> | CPETRL2;Hs.84359                 | structural tight   |                      |
| GI_34222215-S | 339    | 334.8  | 268    | LNX2      | <a href="#">NM_153371.2</a> | MGC46315                         | protein            | intracellula         |
| GI_34222216-I | 1678.1 | 1416.5 | 1725   | GPSN2     | <a href="#">NM_138501.3</a> | SC2;TER                          |                    | integral to          |
| GI_34222217-S | 123.2  | 134.2  | 124.4  | C10orf46  | <a href="#">NM_153810.2</a> | FLJ40409;MGC33215                |                    |                      |
| GI_34222218-S | 887    | 1000.5 | 916.9  | CBLB      | <a href="#">NM_170662.2</a> | RNF56                            | protein            | nucleus NLS-         |
| GI_34222219-S | 453    | 710.9  | 836.5  | CHPF      | <a href="#">NM_024536.4</a> | CSS2;FLJ22678                    |                    |                      |

|               |        |        |        |            |                             |                             |            |              |              |
|---------------|--------|--------|--------|------------|-----------------------------|-----------------------------|------------|--------------|--------------|
| GI_34222220-S | 4276.9 | 2683.6 | 2296   | IMP-2      | <a href="#">NM_006548.3</a> | IMP2;VICKZ2                 | RNA        | cytoplasm    | translation  |
| GI_34222221-S | 123.5  | 107    | 99.7   | EPHX2      | <a href="#">NM_001979.3</a> |                             | epoxide    | cytoplasm    | response     |
| GI_34222222-S | 1326   | 1752   | 549.1  | TPM1       | <a href="#">NM_000366.4</a> | CMH3;TMSA                   | structural | muscle       | regulation   |
| GI_34222223-S | 115.2  | 116.7  | 107.4  | UPP2       | <a href="#">NM_173355.2</a> | UP2;UPASE2;UDRPASE2         | catalytic  |              | nucleoside   |
| GI_34222225-S | 312.4  | 316.2  | 492    | MGC20700   | <a href="#">NM_174983.2</a> | PP3501                      |            |              |              |
| GI_34222226-S | 93.5   | 102.3  | 105.8  | C19orf21   | <a href="#">NM_173481.2</a> |                             | DNA        | nucleus      | regulation   |
| GI_34222227-S | 109.7  | 111.5  | 96.3   | MPP7       | <a href="#">NM_173496.2</a> | FLJ32798                    | protein    |              | intracellula |
| GI_34222229-S | 182.4  | 232.6  | 198.6  | MGC16664   | <a href="#">NM_173509.2</a> |                             |            |              |              |
| GI_34222230-S | 108.3  | 134.4  | 115.1  | MGC43122   | <a href="#">NM_173513.2</a> |                             |            |              |              |
| GI_34222231-S | 375.8  | 525.2  | 414    | MGC33365   | <a href="#">NM_173552.2</a> |                             |            |              |              |
| GI_34222232-S | 97.4   | 105.3  | 96.5   | FGD2       | <a href="#">NM_173558.2</a> | ZFYVE4                      | zinc ion   |              |              |
| GI_34222234-S | 860.9  | 939.6  | 830.5  | MGC29649   | <a href="#">NM_173810.3</a> |                             |            |              |              |
| GI_34222235-S | 108.4  | 129.4  | 108.6  | LOC283248  | <a href="#">NM_173587.2</a> |                             | DNA        | nucleus      |              |
| GI_34222236-S | 464.7  | 475.9  | 479.2  | MGC26717   | <a href="#">NM_173824.2</a> |                             | cysteine-  |              | proteolysis  |
| GI_34222237-S | 99.7   | 104.7  | 104.9  | C6orf182   | <a href="#">NM_173830.3</a> | MGC21731;bA487F23.2         |            |              |              |
| GI_34222238-S | 558.3  | 721.5  | 582.6  | MGC33584   | <a href="#">NM_173680.2</a> |                             | DNA        | nucleus      | regulation   |
| GI_34222239-S | 128.5  | 138.2  | 129.7  | LOC286046  | <a href="#">NM_173683.2</a> |                             |            |              |              |
| GI_34222240-S | 157.7  | 160.1  | 144.9  | C14orf8    | <a href="#">NM_173846.3</a> |                             |            |              |              |
| GI_34222241-S | 995.3  | 1126.6 | 627.2  | LOC90410   | <a href="#">NM_174887.2</a> |                             |            |              |              |
| GI_34222243-S | 7187.9 | 7955.1 | 6403   | ARHC       | <a href="#">NM_175744.3</a> | ARH9;RHOC;RHOH9             | Rho small  |              |              |
| GI_34222245-I | 789.6  | 811.1  | 980.2  | HRAS       | <a href="#">NM_176795.1</a> | HRAS1;RASH1                 | GTPase     | peripheral   | chemotaxi    |
| GI_34222247-S | 280.8  | 330.9  | 310.6  | URP2       | <a href="#">NM_031471.4</a> | KIND3;MIG2B;MGC10966        |            | cytoskelet   |              |
| GI_34222248-S | 161.9  | 151    | 127.3  | FRMD3      | <a href="#">NM_174938.3</a> | 4.1O;P410;EPB41L4O;MGC20553 |            |              |              |
| GI_34222251-I | 264.2  | 272.1  | 284.1  | FLJ22222   | <a href="#">NM_175902.3</a> |                             |            |              |              |
| GI_34222252-S | 123.9  | 139.7  | 128    | DNAJC5B    | <a href="#">NM_033105.3</a> | CSP-beta;MGC26226           | chaperone  | membran      | protein      |
| GI_34222253-A | 862.1  | 947.1  | 903    | PH-4       | <a href="#">NM_177938.1</a> | FLJ20262                    | calcium    | endoplas     |              |
| GI_34222255-S | 193.5  | 212.6  | 197    | DKFZp667B1 | <a href="#">NM_177966.3</a> |                             |            |              |              |
| GI_34222257-S | 813.5  | 996.9  | 1108.1 | UFD1L      | <a href="#">NM_005659.3</a> |                             | ubiquitin- |              | skeletal     |
| GI_34222259-S | 2254.2 | 2377.7 | 2026.6 | ARD1       | <a href="#">NM_003491.2</a> | TE2;DXS707                  | N-         | nucleus      | internal     |
| GI_34222260-S | 546.9  | 608.6  | 508.4  | ZNF482     | <a href="#">NM_006626.3</a> | ZID;ZBTB6                   | protein    | nucleus      |              |
| GI_34222262-S | 116    | 151.4  | 137.3  | KIAA1754L  | <a href="#">NM_178495.3</a> |                             |            |              |              |
| GI_34222264-S | 2771.8 | 2816.8 | 2742.1 | MCRS1      | <a href="#">NM_006337.3</a> | P78;MSP58;ICP22BP           |            | nucleoplas   | regulation   |
| GI_34222265-S | 102.7  | 121.8  | 95.8   | MGC41943   | <a href="#">NM_178561.3</a> |                             |            |              |              |
| GI_34222266-S | 228.3  | 276.1  | 223.3  | STXBP4     | <a href="#">NM_178509.3</a> | Synip;MGC50337              |            |              |              |
| GI_34222267-S | 124.6  | 167.2  | 161.4  | FBXO27     | <a href="#">NM_178820.3</a> | FBG5                        |            |              |              |
| GI_34222268-S | 99.2   | 108    | 110.4  | FLJ13057   | <a href="#">NM_178439.3</a> | GMCL2                       |            |              |              |
| GI_34222269-S | 211.4  | 205.1  | 198.3  | OXR1       | <a href="#">NM_181354.2</a> | FLJ10125                    |            |              |              |
| GI_34222270-S | 306.5  | 346.7  | 312.5  | SFXN2      | <a href="#">NM_178858.3</a> |                             | cation     | mitochond    | cation       |
| GI_34222271-S | 845.5  | 788.3  | 872    | GLUD2      | <a href="#">NM_012084.3</a> | GLUDP1                      | glutamate  | mitochond    | amino        |
| GI_34222272-S | 125.8  | 141.6  | 126.8  | FLJ33620   | <a href="#">NM_178824.3</a> |                             |            |              |              |
| GI_34222273-S | 274.1  | 349.5  | 325.3  | OR2H1      | <a href="#">NM_030883.3</a> | OR2H6;OR2H8;OR6-2;HS6M1-    | olfactory  | integral to  | olfaction    |
| GI_34222274-S | 1032.1 | 1211.4 | 1192.1 | SSA2       | <a href="#">NM_004600.3</a> |                             | ribonucleo | ribonucleo   | transcripti  |
| GI_34222276-S | 214.2  | 261.3  | 227.9  | FLJ14001   | <a href="#">NM_024677.3</a> |                             |            |              |              |
| GI_34222277-S | 105    | 142.7  | 110.6  | FLJ32130   | <a href="#">NM_152458.4</a> |                             | nucleic    | intracellula | regulation   |

|               |        |        |        |            |                             |                                    |             |             |             |
|---------------|--------|--------|--------|------------|-----------------------------|------------------------------------|-------------|-------------|-------------|
| GI_34222278-S | 263.8  | 318.2  | 274.7  | ARMC2      | <a href="#">NM_032131.3</a> | ba787I22.1;DKFZP434P0714           |             |             |             |
| GI_34222280-S | 284.1  | 361.7  | 323.6  | FLJ35989   | <a href="#">NM_152597.3</a> |                                    |             |             |             |
| GI_34222281-S | 264    | 339.7  | 313.1  | FLJ40342   | <a href="#">NM_152347.3</a> |                                    | calcium     |             |             |
| GI_34222283-S | 135.6  | 113.3  | 108.6  | FLJ25421   | <a href="#">NM_152512.3</a> |                                    |             |             |             |
| GI_34222285-S | 90.6   | 105.8  | 93.5   | FLJ25534   | <a href="#">NM_153234.3</a> |                                    |             |             |             |
| GI_34222286-S | 333.9  | 315.9  | 163.3  | CYR61      | <a href="#">NM_001554.3</a> | CCN1;GIG1;IGFBP10                  |             |             | embryoge    |
| GI_34222287-S | 2290.3 | 2321.9 | 2913.5 | TUBG1      | <a href="#">NM_001070.3</a> | TUBG                               | structural  | centrosom   | microtubul  |
| GI_34222289-S | 329.9  | 402.1  | 370.9  | GTF2H4     | <a href="#">NM_001517.3</a> |                                    | transcripti | transcripti | DNA         |
| GI_34222290-S | 105.2  | 101.7  | 107.2  | GRP        | <a href="#">NM_002091.3</a> |                                    | growth      | soluble     | signal      |
| GI_34222291-S | 468.4  | 505.2  | 672.1  | THOP1      | <a href="#">NM_003249.3</a> |                                    | metalloen   |             | proteolysis |
| GI_34222292-S | 321.5  | 670.9  | 612.4  | GYS1       | <a href="#">NM_002103.3</a> | GSY;GYS                            |             |             | glycogen    |
| GI_34222293-S | 3326.2 | 3003.4 | 2789.1 | ATP5D      | <a href="#">NM_001687.3</a> |                                    | hydrogen-   | proton-     | proton      |
| GI_34222294-S | 303.2  | 361.8  | 374.8  | TYK2       | <a href="#">NM_003331.3</a> | JTK1                               | non-        | cytoskelet  | protein     |
| GI_34222295-S | 1889.6 | 2588.2 | 1898.4 | GTF2E2     | <a href="#">NM_002095.3</a> | FE;TF2E2;TFIIE-B                   | general     | transcripti | transcripti |
| GI_34222296-S | 487.5  | 390.3  | 161.2  | FCGRT      | <a href="#">NM_004107.3</a> | FCRN                               | receptor    | integral to | pregnancy   |
| GI_34222297-S | 165.8  | 162.2  | 146.3  | PRKCI      | <a href="#">NM_002740.3</a> | PKCI;DXS1179E                      | atypical    |             | protein     |
| GI_34222299-S | 437.2  | 312.2  | 318.3  | EPS8       | <a href="#">NM_004447.3</a> |                                    | SH3/SH2     |             | EGF         |
| GI_34222300-S | 472.7  | 484.2  | 434.9  | D13S106E   | <a href="#">NM_005800.3</a> |                                    | cysteine-   |             | ubiquitin-  |
| GI_34222301-S | 1371.9 | 933.8  | 363.9  | SLC1A3     | <a href="#">NM_004172.3</a> | EAAT1;GLAST;GLAST1                 | L-          | integral to | L-          |
| GI_34222302-S | 304.2  | 222.9  | 219.9  | TUBGCP3    | <a href="#">NM_006322.3</a> | GCP3;Spc98p                        | structural  | centrosom   | microtubul  |
| GI_34222303-S | 215.1  | 668.2  | 1491.7 | DHRS3      | <a href="#">NM_004753.3</a> | SDR1;Rsdr1;retSDR1                 | nucleotide  | peripheral  | fatty acid  |
| GI_34222304-S | 527.2  | 487.1  | 572.8  | DNAJB2     | <a href="#">NM_006736.4</a> | HSJ1;HSPF3                         | co-         | nucleus     | protein     |
| GI_34222305-S | 480.5  | 419.1  | 401.2  | ZNF263     | <a href="#">NM_005741.3</a> | FPM315                             | transcripti | nucleus     | regulation  |
| GI_34222306-S | 7170.3 | 8963.7 | 6863.9 | PARK7      | <a href="#">NM_007262.3</a> | DJ1;DJ-1                           |             | cytoplasm   | RAS         |
| GI_34222307-S | 3025   | 3093.7 | 4737   | TPBG       | <a href="#">NM_006670.3</a> | 5T4;M6P1;5T4-AG                    | proteoglyc  | integral to | cell        |
| GI_34222308-S | 1900.5 | 2044.5 | 1847.5 | TRAPPC3    | <a href="#">NM_014408.3</a> | BET3                               |             | Golgi       | transport   |
| GI_34222309-S | 366.6  | 465.6  | 461.2  | MYST2      | <a href="#">NM_007067.3</a> | HBO1;HBOA                          | H3/H4       | nucleus     | DNA         |
| GI_34222311-S | 116    | 124.3  | 112.1  | GAPDS      | <a href="#">NM_014364.3</a> | GAPD2;GAPDH-2                      | glyceralde  |             | glycolysis  |
| GI_34222312-S | 466.7  | 552.3  | 730.4  | GPSM2      | <a href="#">NM_013296.3</a> | LGN;Pins                           | GTPase      |             | G-protein   |
| GI_34222313-S | 4725.7 | 3681.8 | 3816.4 | PRP19      | <a href="#">NM_014502.3</a> | PSO4;hPSO4;NMP200                  | structural  |             |             |
| GI_34222315-S | 196.7  | 239.5  | 187.7  | TMOD3      | <a href="#">NM_014547.3</a> | UTMOD                              | tropomyos   | F-actin     |             |
| GI_34222316-S | 197.9  | 273    | 232.4  | KIAA0893   | <a href="#">NM_014969.3</a> |                                    |             |             |             |
| GI_34222317-S | 557.1  | 594.8  | 540.7  | CP110      | <a href="#">NM_014711.3</a> | KIAA0419                           | molecular   | cellular_co | biological_ |
| GI_34222318-S | 872.3  | 928.1  | 865.1  | DULLARD    | <a href="#">NM_015343.3</a> | HSA011916                          |             |             |             |
| GI_34222319-S | 2829.5 | 1994.1 | 1780   | KIAA0063   | <a href="#">NM_014876.3</a> |                                    |             | integral to |             |
| GI_34222320-S | 1219.7 | 1752.1 | 1374.7 | RAP1B      | <a href="#">NM_015646.3</a> | DKFZP586H0723                      | RAS small   | membran     | small       |
| GI_34222322-S | 506.2  | 461.9  | 557.2  | AAAS       | <a href="#">NM_015665.3</a> | AAA;GL003;ADRACALA;ADRACALIN;DKFZp | molecular   | cellular_co | biological_ |
| GI_34222323-S | 1657.7 | 1931.6 | 1638.7 | CGI-51     | <a href="#">NM_015380.3</a> |                                    | molecular   | cellular_co | biological_ |
| GI_34222324-S | 2607.7 | 3052.1 | 2599.1 | COPB       | <a href="#">NM_016451.3</a> | DKFZp761K102                       | vesicle     | Golgi       | pathogene   |
| GI_34222325-S | 914.8  | 739.7  | 717.1  | DKFZP564C1 | <a href="#">NM_015654.3</a> |                                    | N-          |             |             |
| GI_34222326-S | 108.9  | 113.4  | 118.4  | HMP19      | <a href="#">NM_015980.3</a> |                                    |             | Golgi       |             |
| GI_34222327-S | 413.4  | 532.9  | 452.7  | C14orf122  | <a href="#">NM_016049.3</a> | CGI-112                            | molecular   |             |             |
| GI_34222328-S | 1339.2 | 1001.1 | 862.8  | SLC35F2    | <a href="#">NM_017515.3</a> | HSNOV1;FLJ13018                    |             |             |             |
| GI_34222329-S | 2621.1 | 1845.2 | 1603.2 | NOP5/NOP5E | <a href="#">NM_015934.3</a> | HSPC120                            | chaperone   | nucleolus   | snRNP       |

|               |        |        |        |            |                             |                                      |             |                         |
|---------------|--------|--------|--------|------------|-----------------------------|--------------------------------------|-------------|-------------------------|
| GI_34222332-S | 1187.3 | 1484.4 | 1609.5 | FLJ10099   | <a href="#">NM_017994.3</a> |                                      |             |                         |
| GI_34222333-S | 473.2  | 670.8  | 563.2  | TAPBP-R    | <a href="#">NM_018009.3</a> | TAPBPR;FLJ10143                      |             |                         |
| GI_34222335-S | 476    | 652.4  | 685.5  | FLJ10374   | <a href="#">NM_018074.3</a> |                                      |             |                         |
| GI_34222336-S | 1248.7 | 1067.6 | 1453.3 | HT021      | <a href="#">NM_020685.3</a> |                                      |             |                         |
| GI_34222337-S | 1416.5 | 1287.3 | 1295.6 | FLJ11773   | <a href="#">NM_021934.3</a> |                                      |             |                         |
| GI_34222338-S | 100.7  | 105.2  | 100.4  | LIN28      | <a href="#">NM_024674.3</a> | LIN-28;ZCCHC1;FLJ12457               | DNA         | regulation              |
| GI_34222339-S | 600.5  | 645.7  | 684.2  | FLJ11807   | <a href="#">NM_024954.3</a> |                                      |             |                         |
| GI_34222340-S | 2669.1 | 3009.6 | 3440.1 | PQLC1      | <a href="#">NM_025078.3</a> | FLJ22378                             |             |                         |
| GI_34222341-S | 350.9  | 490.9  | 395.6  | DKFZP564D1 | <a href="#">NM_032124.3</a> |                                      | hydrolase   | metabolis               |
| GI_34222342-S | 91.8   | 84.2   | 82.7   | DKFZP434L1 | <a href="#">NM_032136.3</a> |                                      |             |                         |
| GI_34222344-S | 211.2  | 273.1  | 236.6  | GARNL3     | <a href="#">NM_032293.3</a> | bA356B19.1;DKFZp761J1523             | small       |                         |
| GI_34222345-S | 787.7  | 1038.4 | 880.2  | DDX49      | <a href="#">NM_019070.3</a> | FLJ10432;R27090_2                    |             |                         |
| GI_34222346-S | 264.5  | 355.2  | 292.6  | ATOH8      | <a href="#">NM_032827.3</a> | HATH6;FLJ14708                       |             |                         |
| GI_34222347-S | 511.9  | 503    | 445.6  | LRP11      | <a href="#">NM_032832.3</a> | FLJ14735;bA350J20.3                  |             |                         |
| GI_34222348-S | 92     | 83.2   | 89.4   | CPXCR1     | <a href="#">NM_033048.3</a> |                                      |             |                         |
| GI_34222349-S | 137.5  | 151.2  | 134.8  | STK22B     | <a href="#">NM_053006.3</a> | DGS-G;TSSK2;SPOGA2;FLJ38613          | protein-    | protein                 |
| GI_34222350-S | 4651.1 | 3480.7 | 2779.5 | SLC7A5     | <a href="#">NM_003486.4</a> | E16;CD98;LAT1;MPE16;D16S469E         | neutral     | integral to small       |
| GI_34222351-S | 1850.5 | 2143.2 | 2034.3 | C1orf37    | <a href="#">NM_138391.3</a> |                                      |             |                         |
| GI_34222352-S | 388.2  | 460.9  | 577.1  | SLC25A22   | <a href="#">NM_024698.4</a> | GC1;FLJ13044                         | binding     | integral to transport   |
| GI_34222353-S | 314.6  | 372.6  | 348.6  | HIPK4      | <a href="#">NM_144685.3</a> | FLJ32818                             | protein-    | protein                 |
| GI_34222354-S | 213    | 198.7  | 160.2  | FLJ11171   | <a href="#">NM_018348.4</a> |                                      |             |                         |
| GI_34222355-S | 2487.5 | 1714.1 | 1255   | SIAH2      | <a href="#">NM_005067.4</a> |                                      | transcripti | nucleus small           |
| GI_34222356-S | 309.9  | 303.9  | 385.8  | C1orf26    | <a href="#">NM_017673.4</a> | FLJ20121                             |             |                         |
| GI_34222357-S | 321.1  | 382.1  | 384.3  | LOC90268   | <a href="#">NM_138348.3</a> |                                      |             |                         |
| GI_34222359-S | 114.3  | 123.3  | 97.7   | DKFZp434G0 | <a href="#">NM_181775.2</a> |                                      |             |                         |
| GI_34222360-S | 4058.4 | 4354.8 | 2882.3 | ATP1A1     | <a href="#">NM_000701.5</a> |                                      | sodium/po   | sodium/po sodium        |
| GI_34222361-S | 234.3  | 293.8  | 269    | LOC148066  | <a href="#">NM_181710.2</a> |                                      | peptidase   | proteolysis             |
| GI_34222363-S | 747.8  | 895    | 745.4  | LOC55971   | <a href="#">NM_018842.3</a> | IRTKS                                |             |                         |
| GI_34222364-S | 2525.1 | 2735.8 | 2503   | DC6        | <a href="#">NM_020189.4</a> |                                      |             |                         |
| GI_34222365-S | 238.3  | 280.9  | 246.9  | MLPH       | <a href="#">NM_024101.4</a> | In;MELPH;I1Rk3;MGC2771;SLAC2-A;Slac- |             |                         |
| GI_34222368-S | 873.7  | 734.6  | 726.1  | MDS009     | <a href="#">NM_020234.3</a> |                                      |             |                         |
| GI_34222370-S | 123.3  | 125.5  | 135.3  | WBSCR28    | <a href="#">NM_182504.2</a> | MGC26719                             |             |                         |
| GI_34222372-S | 137.5  | 124.3  | 108    | MGC29671   | <a href="#">NM_182538.2</a> |                                      |             |                         |
| GI_34222374-S | 123.6  | 131.6  | 123.1  | MGC21830   | <a href="#">NM_182563.2</a> |                                      |             |                         |
| GI_34222376-S | 862.9  | 1045.1 | 873    | MGC44287   | <a href="#">NM_182607.2</a> |                                      |             | membran                 |
| GI_34222377-S | 119.2  | 129    | 121.5  | MGC33835   | <a href="#">NM_182548.2</a> |                                      |             |                         |
| GI_34222379-S | 838.1  | 1085.2 | 1012.5 | MGC29814   | <a href="#">NM_182565.2</a> |                                      |             |                         |
| GI_34222380-S | 203.7  | 244.6  | 331    | MGC20579   | <a href="#">NM_182614.2</a> |                                      |             |                         |
| GI_34222383-S | 367    | 321.5  | 331.7  | FLJ22002   | <a href="#">NM_024838.3</a> |                                      | ATP         | amino                   |
| GI_34222384-S | 117.8  | 128.1  | 123.3  | LRRN1      | <a href="#">NM_020873.3</a> | KIAA1497                             |             |                         |
| GI_34222385-S | 204.4  | 252.8  | 211.9  | CRF        | <a href="#">NM_006688.3</a> |                                      | molecular   | microfibril locomotor   |
| GI_34222388-I | 168    | 154.1  | 137.4  | HTF9C      | <a href="#">NM_182984.2</a> | D22S1733E                            | S-          |                         |
| GI_34222390-S | 442.2  | 411.9  | 377.3  | ZNF605     | <a href="#">NM_183238.1</a> |                                      | nucleic     | intracellula regulation |
| GI_34222392-S | 94.6   | 99.7   | 101    | KSR2       | <a href="#">NM_173598.2</a> | FLJ25965                             | ATP         | protein                 |

|               |        |        |        |            |                             |                                   |                 |              |            |
|---------------|--------|--------|--------|------------|-----------------------------|-----------------------------------|-----------------|--------------|------------|
| GI_34222394-S | 117.9  | 150.6  | 130.4  | PR1        | <a href="#">NM_183240.1</a> | PR;CACNG5                         |                 |              |            |
| GI_34303916-S | 738.2  | 638.8  | 763.9  | FLJ23322   | <a href="#">NM_024955.4</a> |                                   | disulfide       | electron     |            |
| GI_34303917-S | 201.4  | 234.9  | 217.7  | GPR92      | <a href="#">NM_020400.3</a> | GPR93                             | receptor        | integral to  | G-protein  |
| GI_34303918-S | 147.6  | 161.1  | 173.9  | ZFYVE27    | <a href="#">NM_144588.3</a> | FLJ32919                          | zinc ion        |              |            |
| GI_34303919-S | 400.9  | 514.2  | 671.2  | LRFN4      | <a href="#">NM_024036.3</a> | MGC3103                           |                 |              |            |
| GI_34303920-S | 89.1   | 86.3   | 87.1   | PPP3R2     | <a href="#">NM_147180.2</a> |                                   | calcium         |              |            |
| GI_34303921-S | 659.1  | 631.3  | 483.1  | TRUB1      | <a href="#">NM_139169.3</a> |                                   | pseudouri       | tRNA         |            |
| GI_34303922-S | 170.1  | 200.1  | 210.5  | RG9MTD2    | <a href="#">NM_152292.2</a> | MGC27034                          |                 |              |            |
| GI_34303923-S | 110.5  | 102.3  | 97.9   | FLJ32191   | <a href="#">NM_144689.3</a> |                                   | nucleic         | intracellula | regulation |
| GI_34303924-S | 101.3  | 115.8  | 105.6  | MGC35033   | <a href="#">NM_152319.2</a> |                                   |                 |              |            |
| GI_34303925-S | 220.1  | 223.1  | 227.9  | DKFZp727A0 | <a href="#">NM_152268.2</a> | MGC14416;MGC19467                 | ATP             | prolyl-      |            |
| GI_34303927-S | 159.3  | 195.3  | 167.9  | ATP1A3     | <a href="#">NM_152296.2</a> | MGC13276                          | sodium/po       | sodium/po    | small      |
| GI_34303929-S | 1769.8 | 1643.4 | 646.9  | C14orf31   | <a href="#">NM_152330.2</a> | MGC17921;c14_5320                 |                 | cytoskelet   |            |
| GI_34303930-S | 126.8  | 146.6  | 126.4  | MGC20262   | <a href="#">NM_152421.2</a> |                                   |                 |              |            |
| GI_34303931-S | 106.5  | 104.1  | 97.6   | MGC35118   | <a href="#">NM_152453.2</a> |                                   |                 |              |            |
| GI_34303933-S | 96.1   | 104.9  | 102.5  | C19orf18   | <a href="#">NM_152474.2</a> | MGC41906                          |                 |              |            |
| GI_34303934-S | 264.3  | 308.3  | 279.6  | MGC33295   | <a href="#">NM_152505.2</a> |                                   |                 | kinesin      |            |
| GI_34303935-S | 188.2  | 196.9  | 163.1  | IBRDC1     | <a href="#">NM_152553.2</a> | C6orf172;MGC26996;dJ84N20.1       |                 |              |            |
| GI_34303936-S | 131.3  | 176    | 180.2  | MGC33094   | <a href="#">NM_152585.1</a> |                                   |                 |              |            |
| GI_34303938-S | 195.1  | 219.8  | 197.2  | MGC33637   | <a href="#">NM_152596.2</a> |                                   | nucleic         | intracellula |            |
| GI_34303940-S | 165.9  | 206.8  | 199.9  | ZNF567     | <a href="#">NM_152603.2</a> | MGC45586                          | nucleic         | nucleus      | regulation |
| GI_34303942-S | 105.5  | 113.5  | 99.6   | C20orf75   | <a href="#">NM_152611.2</a> | MGC25027;dJ1056H1.1               |                 | integral to  |            |
| GI_34303943-S | 212.7  | 239.4  | 213.9  | ZNF515     | <a href="#">NM_152629.2</a> | MGC33662                          |                 |              |            |
| GI_34303945-S | 79     | 81.7   | 88.7   | MGC26999   | <a href="#">NM_152630.2</a> |                                   |                 |              |            |
| GI_34303946-S | 113.9  | 127.1  | 120.9  | MGC26598   | <a href="#">NM_152638.2</a> |                                   |                 |              |            |
| GI_34303947-S | 115.2  | 129.5  | 125.7  | MGC34032   | <a href="#">NM_152697.2</a> |                                   |                 |              |            |
| GI_34303948-S | 274.8  | 339.4  | 317.1  | SEN5       | <a href="#">NM_152699.2</a> | MGC27076                          | cysteine-kinase | proteolysis  |            |
| GI_34303949-S | 103.3  | 102.4  | 93.7   | MGC26597   | <a href="#">NM_152700.2</a> |                                   |                 |              |            |
| GI_34303950-S | 108.8  | 118    | 109.6  | MGC26647   | <a href="#">NM_152706.2</a> |                                   |                 |              |            |
| GI_34303951-S | 1404.5 | 1888.1 | 1258.8 | ITM1       | <a href="#">NM_152713.2</a> | TMC;MGC9042                       | oligosacch      | membran      | protein    |
| GI_34303952-S | 418.7  | 368    | 354.1  | ZNF187     | <a href="#">NM_152736.2</a> | MGC2815;SRE-ZBP                   | DNA             | nucleus      | cell       |
| GI_34303954-S | 72.2   | 69.5   | 76.9   | MGC26989   | <a href="#">NM_152763.2</a> |                                   |                 |              |            |
| GI_34303955-S | 120.8  | 132.1  | 120.4  | MGC33510   | <a href="#">NM_152765.2</a> |                                   |                 |              |            |
| GI_34303956-S | 334.7  | 507.3  | 386.8  | MGC33212   | <a href="#">NM_152773.2</a> |                                   |                 |              |            |
| GI_34303957-S | 97.8   | 101.1  | 95.1   | C14orf48   | <a href="#">NM_152777.2</a> | MGC33356;c14_5713                 |                 |              |            |
| GI_34303958-S | 102.3  | 106.8  | 122.5  | MGC33329   | <a href="#">NM_152782.2</a> |                                   |                 |              |            |
| GI_34303960-S | 240.1  | 219.4  | 226    | NEDD1      | <a href="#">NM_152905.2</a> | FLJ35902                          |                 |              |            |
| GI_34303961-S | 291    | 298.4  | 270.2  | ZNF548     | <a href="#">NM_152909.2</a> | FLJ32932                          | nucleic         | intracellula | regulation |
| GI_34303962-A | 797    | 1090.2 | 759.9  | MDS010     | <a href="#">NM_020231.3</a> | MDSRP;MGC32995                    |                 |              |            |
| GI_34303963-A | 134.6  | 134.3  | 125.7  | 384D8-2    | <a href="#">NM_014551.3</a> | 384D8_6;MGC2455;MGC4133;MGC5305;M |                 |              |            |
| GI_34303963-I | 134.3  | 139    | 124    | 384D8-2    | <a href="#">NM_014551.3</a> | 384D8_6;MGC2455;MGC4133;MGC5305;M |                 |              |            |
| GI_34303964-S | 379.1  | 382    | 442.9  | TTK        | <a href="#">NM_003318.3</a> | ESK;PYT;MPS1L1                    | protein-        | spindle      | spindle    |
| GI_34304112-S | 110.4  | 103.9  | 116.3  | BTBD8      | <a href="#">NM_183242.1</a> |                                   |                 |              |            |
| GI_34304114-I | 99     | 106.4  | 94.4   | RBPSUH     | <a href="#">NM_015874.2</a> | csI;CBF1;KBF2;RBP-                |                 |              |            |

|               |        |        |        |         |                             |                                       |             |             |              |
|---------------|--------|--------|--------|---------|-----------------------------|---------------------------------------|-------------|-------------|--------------|
| GI_34304116-S | 46826  | 52889  | 48372  | UBC     | <a href="#">NM_021009.2</a> | HMG20                                 | ubiquitin   |             |              |
| GI_34304319-S | 1359.2 | 1558.3 | 1449.8 | MRP63   | <a href="#">NM_024026.3</a> | bMRP63;MGC3243                        | structural  |             |              |
| GI_34304320-A | 3186.5 | 3138.8 | 2386.9 | MRPS21  | <a href="#">NM_031901.3</a> | MDS016;RPMS21;MRP-S21                 |             |             |              |
| GI_34304321-S | 1650.5 | 1582.5 | 1577   | MRPL45  | <a href="#">NM_032351.3</a> | MGC11321                              | structural  | mitochond   | protein      |
| GI_34304323-I | 94.7   | 116    | 97.6   | MRPS12  | <a href="#">NM_033362.2</a> | RPS12;RPMS12;RPSM12;MPR-S12;MT-       | structural  | mitochond   | protein      |
| GI_34304324-S | 1932.7 | 1524.2 | 1346.4 | MRPS5   | <a href="#">NM_031902.3</a> | MRP-S5                                | structural  | ribosome    | protein      |
| GI_34304325-S | 3287   | 2815   | 2596.8 | MRPS6   | <a href="#">NM_032476.2</a> | RPMS6;MRP-S6;C21orf101                | structural  | small       | protein      |
| GI_34304330-I | 238.9  | 193    | 175.5  | RNF7    | <a href="#">NM_183063.1</a> | SAG;ROC2;CKBBP1                       | copper ion  | cytoplasm   | redox        |
| GI_34304332-A | 127.2  | 135.4  | 119.7  | RNF7    | <a href="#">NM_183237.1</a> | SAG;ROC2;CKBBP1                       | copper ion  | cytoplasm   | redox        |
| GI_34304334-I | 287.2  | 266    | 300    | RNF8    | <a href="#">NM_003958.2</a> | KIAA0646                              |             |             |              |
| GI_34304335-A | 134.6  | 138.9  | 134.7  | RNF8    | <a href="#">NM_183078.1</a> | KIAA0646                              |             |             |              |
| GI_34304337-S | 129.2  | 179.1  | 211.9  | ABHD3   | <a href="#">NM_138340.3</a> | LABH3;MGC11259                        | catalytic   |             |              |
| GI_34304338-I | 172.2  | 197.8  | 178.2  | ACOX1   | <a href="#">NM_004035.4</a> | ACOX;MGC1198;PALMCOX                  | acyl-CoA    | peroxisom   | lipid        |
| GI_34304339-A | 181.5  | 230.4  | 225.2  | ACOX1   | <a href="#">NM_007292.3</a> | ACOX;MGC1198;PALMCOX                  | acyl-CoA    | peroxisom   | lipid        |
| GI_34304339-I | 107.1  | 118.2  | 114.3  | ACOX1   | <a href="#">NM_007292.3</a> | ACOX;MGC1198;PALMCOX                  | acyl-CoA    | peroxisom   | lipid        |
| GI_34304340-A | 537.7  | 391.3  | 431.7  | PDCD4   | <a href="#">NM_014456.3</a> | H731;MGC33046;MGC33047                |             |             | apoptosis    |
| GI_34304341-I | 90.5   | 88.1   | 91.5   | PDCD4   | <a href="#">NM_145341.2</a> | H731;MGC33046;MGC33047                |             |             | apoptosis    |
| GI_34304342-S | 111.3  | 115    | 106.5  | PPP1R3A | <a href="#">NM_002711.2</a> | PP1G;PPP1R3                           | type 1      |             |              |
| GI_34304343-A | 5014.7 | 2822.5 | 1888.7 | PSAT1   | <a href="#">NM_021154.3</a> | PSA                                   | phosphos    |             | L-serine     |
| GI_34304345-S | 5002.8 | 4666   | 5158.2 | TM4SF7  | <a href="#">NM_003271.3</a> | NAG-2;TSPAN-4;TETRASPAN               |             | integral to | protein      |
| GI_34304346-A | 333.1  | 413.7  | 374    | TMPRSS4 | <a href="#">NM_183247.1</a> | MT-SP2;TMPRSS3                        | trypsin     | integral to | proteolysis  |
| GI_34304348-I | 122.3  | 115.2  | 111.5  | TMPRSS4 | <a href="#">NM_019894.2</a> | MT-SP2;TMPRSS3                        | trypsin     | integral to | proteolysis  |
| GI_34304350-S | 120.8  | 273.3  | 209.5  | BF      | <a href="#">NM_001710.3</a> | GBG;CFAB;PBF2                         | serine-     |             | proteolysis  |
| GI_34304351-S | 99.8   | 95.2   | 91.1   | BGN     | <a href="#">NM_001711.3</a> | PGI;DSPG1;PG-S1;SLRR1A                | extracellul | extracellul | biological_  |
| GI_34304352-I | 108.2  | 130.6  | 121.9  | SCAPIN1 | <a href="#">NM_080672.2</a> | H17739                                | DNA         | nucleus     | regulation   |
| GI_34304355-A | 100.6  | 105.1  | 80.9   | SCAPIN1 | <a href="#">NM_183246.1</a> | H17739                                | DNA         | nucleus     | regulation   |
| GI_34304357-S | 343.6  | 403.1  | 376.3  | NFKBIL2 | <a href="#">NM_013432.3</a> | IKBR                                  | transcripti | cytoplasm   |              |
| GI_34304359-S | 296.7  | 365    | 254.2  | NPHP3   | <a href="#">NM_153240.3</a> | NPH3;FLJ30691;FLJ36696;KIAA2000;DKFZp |             |             |              |
| GI_34304361-S | 659.8  | 675.5  | 678.2  | NPHP4   | <a href="#">NM_015102.2</a> | SLSN4;KIAA0673                        |             |             |              |
| GI_34304362-S | 721.7  | 588.6  | 343.3  | FADS3   | <a href="#">NM_021727.3</a> | CYB5RP;LLCDL3;BC269730_1              |             |             |              |
| GI_34304364-S | 223.8  | 221.4  | 278.1  | FKBPL   | <a href="#">NM_022110.3</a> | NG7;DIR1                              | molecular   | cellular_co | response     |
| GI_34304365-S | 122.6  | 136.8  | 108.2  | FKHL18  | <a href="#">NM_004118.3</a> | FREAC10;MGC4544                       | transcripti | nucleus     | circulation  |
| GI_34304366-S | 4817   | 8319.3 | 5928   | FSTL1   | <a href="#">NM_007085.3</a> | FRP;FSL1                              | heparin     | extracellul |              |
| GI_34304367-I | 114.1  | 128.2  | 105.2  | DTNBP1  | <a href="#">NM_183040.1</a> | SDY;My031;FLJ30031;MGC20210;DKFZP56   |             |             |              |
| GI_34304371-A | 528.6  | 405.9  | 411.3  | DTNBP1  | <a href="#">NM_032122.3</a> | SDY;My031;FLJ30031;MGC20210;DKFZP56   |             |             |              |
| GI_34304372-S | 1271.7 | 1745.5 | 1964.9 | CCNB1   | <a href="#">NM_031966.2</a> | CCNB                                  | cyclin-     | nucleus     | G2/M         |
| GI_34304373-S | 356.9  | 461.5  | 397.8  | CDK5R1  | <a href="#">NM_003885.2</a> | p23;p25;p35;CDK5R;NCK5A;CDK5P35;MGC   | cell cycle  | cyclin-     | regulation   |
| GI_34304375-I | 98.4   | 97.9   | 105.7  | SNX3    | <a href="#">NM_152828.2</a> | SDP3;SNX3A;MGC17570                   |             | peripheral  | endocytosi   |
| GI_34304376-I | 119.4  | 111.3  | 100.3  | HYAL2   | <a href="#">NM_033158.2</a> | LUCA2;LuCa-2                          | hyalurono   | lysosome    | glycosami    |
| GI_34304378-A | 263.9  | 325.3  | 296.3  | INVS    | <a href="#">NM_183245.1</a> | INV;NPH2;NPHP2                        |             |             |              |
| GI_34304380-I | 122.2  | 117    | 106.6  | INVS    | <a href="#">NM_014425.2</a> | INV;NPH2;NPHP2                        |             |             |              |
| GI_34304382-S | 4436.1 | 4518   | 3895.3 | USH1G   | <a href="#">NM_173477.2</a> | SANS;FLJ33924                         |             |             |              |
| GI_34304384-S | 4125.1 | 5141.6 | 4615.6 | YKT6    | <a href="#">NM_006555.3</a> |                                       |             | ER-Golgi    | nonselecti   |
| GI_34304385-S | 3351.7 | 3964.2 | 3614.2 | YWHAE   | <a href="#">NM_006761.3</a> | MDS;MDCR;KCIP-1;14-3-3E               | protein     |             | intracellula |

|               |         |        |        |           |                             |                                   |             |             |             |
|---------------|---------|--------|--------|-----------|-----------------------------|-----------------------------------|-------------|-------------|-------------|
| GI_34305287-S | 112.7   | 116    | 108.9  | RNF2      | <a href="#">NM_007212.2</a> | DING;BAP-1                        |             |             |             |
| GI_34305288-S | 277.2   | 348.7  | 310.2  | RNF3      | <a href="#">NM_006315.3</a> | DONG1;RNF3A;FLJ36550;MGC40413     |             |             |             |
| GI_34305289-S | 676.1   | 782.1  | 517.8  | RNF4      | <a href="#">NM_002938.2</a> | SNURF;RES4-26                     | antiviral   | nucleus     | regulation  |
| GI_34305290-S | 565.9   | 716.6  | 742.4  | RNF5      | <a href="#">NM_006913.2</a> | RMA1;RING5                        | protein     |             |             |
| GI_34305292-I | 87.5    | 89.9   | 91.5   | RNF6      | <a href="#">NM_183043.1</a> |                                   | zinc ion    | cellular_co | biological_ |
| GI_34305294-I | 78.5    | 76.7   | 82     | RNF6      | <a href="#">NM_183044.1</a> |                                   | zinc ion    | cellular_co | biological_ |
| GI_34305296-A | 118.5   | 117.1  | 126    | RNF6      | <a href="#">NM_183045.1</a> |                                   | zinc ion    | cellular_co | biological_ |
| GI_34305296-I | 93.8    | 93.8   | 101.9  | RNF6      | <a href="#">NM_183045.1</a> |                                   | zinc ion    | cellular_co | biological_ |
| GI_34305454-S | 1355.6  | 996.1  | 1002.6 | GCC1      | <a href="#">NM_024523.5</a> | GCC1P;GCC88;FLJ22035;MGC20706     |             | Golgi       |             |
| GI_34305455-S | 533.7   | 692.3  | 579.3  | DRG2      | <a href="#">NM_001388.3</a> |                                   | GTP         |             | cell growth |
| GI_34328078-S | 425.3   | 571.1  | 598.8  | PTD015    | <a href="#">NM_024684.2</a> | MGC3367;FLJ21035                  |             |             |             |
| GI_34328079-S | 683.5   | 613.4  | 609.7  | LOC90580  | <a href="#">NM_138358.2</a> |                                   |             |             |             |
| GI_34328080-S | 625     | 681    | 647    | MGC29729  | <a href="#">NM_152274.2</a> |                                   |             |             |             |
| GI_34328082-S | 148.7   | 220.2  | 174.1  | SLC10A4   | <a href="#">NM_152679.2</a> | MGC29802                          | bile        | membran     | sodium      |
| GI_34328898-S | 205.4   | 281.4  | 207.6  | PTPN14    | <a href="#">NM_005401.3</a> | PEZ;PTP36                         | protein     | cytoskelet  | protein     |
| GI_34328901-A | 99.9    | 105.4  | 88.4   | PTPN6     | <a href="#">NM_080548.2</a> | HCP;HCPH;SHP-1;HPTP1C;PTP-1C;SHP- | protein     | membran     | G-protein   |
| GI_34328901-I | 121.4   | 128.9  | 109.3  | PTPN6     | <a href="#">NM_080548.2</a> | HCP;HCPH;SHP-1;HPTP1C;PTP-1C;SHP- | protein     | membran     | G-protein   |
| GI_34328902-I | 240.1   | 298.9  | 270.1  | PTPN6     | <a href="#">NM_080549.2</a> | HCP;HCPH;SHP-1;HPTP1C;PTP-1C;SHP- | protein     | membran     | G-protein   |
| GI_34328903-A | 321.7   | 285.9  | 385    | PIGN      | <a href="#">NM_012327.3</a> | MCD4;MDC4;PIG-N;MGC26427          |             |             |             |
| GI_34328904-I | 99.1    | 108.7  | 94.7   | PIGN      | <a href="#">NM_176787.2</a> | MCD4;MDC4;PIG-N;MGC26427          |             |             |             |
| GI_34328905-S | 1539    | 1310.2 | 1042.6 | DDX19     | <a href="#">NM_007242.3</a> | DBP5                              | helicase    | nuclear     | mRNA-       |
| GI_34328906-I | 779.5   | 1107.8 | 907.1  | DNAJB6    | <a href="#">NM_058246.3</a> | MRJ;HHDJ1;HSJ-2;MSJ-              | heat        | cellular_co | biological_ |
| GI_34328907-S | 261.1   | 126    | 101    | DRD5      | <a href="#">NM_000798.3</a> | DBDR;DRD1B;DRD1L2;MGC10601        | dopamine    | integral to | dopamine    |
| GI_34328908-A | 5069.1  | 7153.1 | 4754.6 | DUSP4     | <a href="#">NM_001394.4</a> | TYP;HVH2;MKP2;MKP-2               | protein     | nucleus     | MAPKKK      |
| GI_34328908-I | 289     | 439.9  | 341.4  | DUSP4     | <a href="#">NM_001394.4</a> | TYP;HVH2;MKP2;MKP-2               | protein     | nucleus     | MAPKKK      |
| GI_34328912-S | 254.7   | 315.6  | 299.8  | WNT7A     | <a href="#">NM_004625.3</a> |                                   | receptor    | extracellul | sex         |
| GI_34328913-I | 1095.7  | 1511.4 | 1840.8 | CD151     | <a href="#">NM_004357.3</a> | GP27;SFA1;PETA-3                  | cell        | integral to | cell        |
| GI_34328914-A | 10139.6 | 11819  | 12041  | CD151     | <a href="#">NM_139030.2</a> | GP27;SFA1;PETA-3                  | cell        | integral to | cell        |
| GI_34328925-A | 255     | 305.7  | 274.8  | ACRV1     | <a href="#">NM_020115.3</a> | SPACA2;D11S4365                   |             |             | developm    |
| GI_34328927-A | 2548.4  | 2100.9 | 3142.7 | IMPDH1    | <a href="#">NM_183243.1</a> | IMPD;IMPD1                        | IMP         |             | GTP         |
| GI_34328929-I | 102.8   | 90.1   | 91.4   | IMPDH1    | <a href="#">NM_000883.2</a> | IMPD;IMPD1                        | IMP         |             | GTP         |
| GI_34328933-S | 138     | 153.6  | 135.7  | NTF5      | <a href="#">NM_006179.3</a> | NT4;NT5;NTF4;NT-4/5               | growth      |             |             |
| GI_34328934-S | 1526.7  | 1628   | 1493.2 | MRPL13    | <a href="#">NM_014078.4</a> | L13;L13mt;RPL13                   | structural  | ribosome    | protein     |
| GI_34328935-S | 197.3   | 212.5  | 243.9  | SNRPD3    | <a href="#">NM_004175.3</a> | SMD3                              | small       | spliceoso   | mRNA        |
| GI_34328936-S | 5548.1  | 5425.6 | 5406.4 | CD63      | <a href="#">NM_001780.3</a> | MLA1;ME491;LAMP-3;OMA81H          |             | lysosomal   |             |
| GI_34328937-I | 249.6   | 201.9  | 183.2  | CTH       | <a href="#">NM_001902.4</a> | MGC9471                           | cystathioni |             | cysteine    |
| GI_34328938-A | 852.9   | 429.3  | 403.6  | CTH       | <a href="#">NM_153742.3</a> | MGC9471                           | cystathioni |             | cysteine    |
| GI_34328939-S | 222.9   | 245.8  | 205.3  | CYCS      | <a href="#">NM_018947.4</a> | CYC;HCS                           | electron    | mitochond   | induction   |
| GI_34328940-S | 153.6   | 179.2  | 186.6  | TGIF2LX   | <a href="#">NM_138960.3</a> | TGIFLX;MGC34726                   | transcripti | nucleus     | regulation  |
| GI_34328942-S | 186.2   | 215.6  | 195.7  | TGIF2LY   | <a href="#">NM_139214.2</a> | TGIFLY                            | transcripti | nucleus     | regulation  |
| GI_34328943-S | 128.8   | 129.4  | 113.5  | TMSB4X    | <a href="#">NM_021109.2</a> | FX;TB4X;PTMB4;TMSB4               | actin       | cytoskelet  | developm    |
| GI_34328944-S | 104.9   | 112.2  | 106.6  | TMSB4Y    | <a href="#">NM_004202.2</a> | TB4Y;MGC26307                     | actin       | cytoskelet  | regulation  |
| GI_34330151-S | 143.3   | 153.7  | 149.7  | NUDT13    | <a href="#">NM_015901.3</a> | DKFZp586P2219                     |             |             |             |
| GI_34330156-S | 175.9   | 199.8  | 195.3  | LOC113730 | <a href="#">NM_138433.2</a> |                                   |             |             |             |

|               |        |        |        |          |                             |                                       |            |             |              |
|---------------|--------|--------|--------|----------|-----------------------------|---------------------------------------|------------|-------------|--------------|
| GI_34330161-S | 120.5  | 101.6  | 124.2  | OR2H3    | <a href="#">NM_007160.2</a> | FAT11;OLFR2                           | defense/i  | integral to | mating       |
| GI_34330167-S | 94.7   | 120.2  | 103.2  | OR6A2    | <a href="#">NM_003696.2</a> | I7;OR6A1;OR6A2P;OR11-55               | G-protein  | integral to | signal       |
| GI_34330189-S | 897.3  | 831.8  | 765.1  | HKR1     | <a href="#">NM_181786.2</a> |                                       | zinc ion   | nucleus     | regulation   |
| GI_34330190-S | 1741.3 | 1804.2 | 2128.2 | SLC39A3  | <a href="#">NM_144564.3</a> | ZIP3                                  | heavy      | membran     | heavy        |
| GI_34335114-I | 372.7  | 398.6  | 368.3  | BAX      | <a href="#">NM_004324.3</a> |                                       |            |             | apoptotic    |
| GI_34335124-I | 189.4  | 217.8  | 209.2  | BAX      | <a href="#">NM_138764.2</a> |                                       |            |             | apoptotic    |
| GI_34335126-I | 95     | 86.8   | 87.4   | GCC2     | <a href="#">NM_181453.2</a> | GCC185;KIAA0336                       |            | Golgi       |              |
| GI_34335132-A | 124    | 127.3  | 108.4  | GCC2     | <a href="#">NM_014635.3</a> | GCC185;KIAA0336                       |            | Golgi       |              |
| GI_34335133-A | 1048   | 1349.1 | 1004.2 | SEC13L1  | <a href="#">NM_183352.1</a> | SEC13R;D3S1231E                       | protein    |             | intracellula |
| GI_34335143-S | 5267.3 | 4986.2 | 4041.2 | RPL36AL  | <a href="#">NM_001001.3</a> | RPL36A                                | structural | ribosome    | protein      |
| GI_34335144-I | 3750.5 | 3106.3 | 2869.2 | RPLP0    | <a href="#">NM_053275.2</a> | P0;L10E;RPP0;PRLP0                    | structural | cytosolic   | protein      |
| GI_34335149-S | 1638.3 | 2206.9 | 1706.8 | RPS11    | <a href="#">NM_001015.3</a> |                                       | structural | ribosome    | protein      |
| GI_34335150-S | 3389.3 | 3680.9 | 2443.9 | RPS15A   | <a href="#">NM_001019.3</a> |                                       | structural | cytosolic   | protein      |
| GI_34335151-S | 19953  | 18300  | 14855  | RPS16    | <a href="#">NM_001020.3</a> |                                       | structural | cytosolic   | protein      |
| GI_34335176-A | 550.3  | 564.9  | 531.4  | CCL14    | <a href="#">NM_032963.2</a> | CC-1;CC-3;CKb1;MCIF;NCC2;SY14;HCC-    | signal     | extracellul | positive     |
| GI_34335180-A | 81.4   | 77.2   | 72.3   | CCL15    | <a href="#">NM_032965.2</a> | LKN1;NCC3;SY15;HCC-2;Lkn-1;MIP-5;NCC- | chemokine  | extracellul | chemotaxi    |
| GI_34335180-I | 74.5   | 85.6   | 69.6   | CCL15    | <a href="#">NM_032965.2</a> | LKN1;NCC3;SY15;HCC-2;Lkn-1;MIP-5;NCC- | chemokine  | extracellul | chemotaxi    |
| GI_34335183-A | 140.2  | 127.8  | 143.7  | BHD      | <a href="#">NM_144606.3</a> | FLCL;MGC17998;MGC23445                |            |             |              |
| GI_34335183-I | 431.6  | 362.6  | 486.4  | BHD      | <a href="#">NM_144606.3</a> | FLCL;MGC17998;MGC23445                |            |             |              |
| GI_34335184-I | 832.3  | 684.7  | 749.2  | BHD      | <a href="#">NM_144997.3</a> | FLCL;MGC17998;MGC23445                |            |             |              |
| GI_34335205-I | 101.2  | 103.5  | 96     | CREM     | <a href="#">NM_001881.2</a> | ICER;MGC17881;MGC41893                |            | nucleus     | signal       |
| GI_34335229-A | 162.7  | 206.1  | 161.4  | CARD9    | <a href="#">NM_052814.2</a> |                                       | apoptosis  | kinesin     | apoptosis    |
| GI_34335230-S | 601.8  | 586.6  | 641.5  | CDC45L   | <a href="#">NM_003504.3</a> | CDC45;CDC45L2;PORC-PI-1               | cell cycle | nucleus     | DNA          |
| GI_34335231-S | 1135   | 2823.7 | 1421.6 | CKB      | <a href="#">NM_001823.3</a> | B-CK;CKBB                             | creatine   | cytoplasm   |              |
| GI_34335232-S | 112.6  | 120.3  | 102    | CLDN4    | <a href="#">NM_001305.3</a> | CPER;CPE-                             | transmem   | tight       | pathogene    |
| GI_34335233-I | 1136.7 | 1155.6 | 1156.3 | CNOT7    | <a href="#">NM_013354.4</a> | CAF1;hCAF-1                           | signal     | nucleus     | carbohydr    |
| GI_34335234-A | 412.1  | 333.9  | 332.8  | CORO2A   | <a href="#">NM_052820.2</a> | IR10;WDR2;CLIPINB                     | protein    | kinesin     | intracellula |
| GI_34335235-S | 379.5  | 422    | 388.2  | CPLX1    | <a href="#">NM_006651.3</a> | CPX1                                  | vesicle    |             | exocytosis   |
| GI_34335236-S | 961.1  | 1364.6 | 1080.2 | MAGEA12  | <a href="#">NM_005367.3</a> | MAGE12                                | molecular  | cellular_co | biological_  |
| GI_34335237-S | 163    | 181.2  | 146.7  | MAGEA2b  | <a href="#">NM_153488.3</a> | MAGE2;MAGEA2;MGC16973                 |            |             |              |
| GI_34335238-S | 117.2  | 134.3  | 129    | MAGEA9   | <a href="#">NM_005365.4</a> | MAGE9;MGC8421                         | molecular  | cellular_co | biological_  |
| GI_34335239-S | 2980.4 | 2807.3 | 2982.6 | MAGEB2   | <a href="#">NM_002364.3</a> | DAM6;MGC26438;MAGE-XP-2               | tumor      |             |              |
| GI_34335240-S | 1387.3 | 1474.1 | 1230.1 | MAGEF1   | <a href="#">NM_022149.3</a> | MGC19617                              | sterol     |             |              |
| GI_34335241-S | 3393.9 | 2958.5 | 3900   | MAPKAPK3 | <a href="#">NM_004635.3</a> | 3PK;MAPKAP3                           | MAP        | nucleus     | response     |
| GI_34335242-S | 3994.4 | 4232.7 | 3938.8 | MATR3    | <a href="#">NM_018834.3</a> | MGC9105;KIAA0723                      | structural | nuclear     | cell shape   |
| GI_34335243-I | 101.1  | 94.2   | 95.2   | MMP28    | <a href="#">NM_032950.2</a> | MM28;MMP25                            |            |             |              |
| GI_34335244-A | 132    | 434.6  | 100.3  | NMNAT2   | <a href="#">NM_170706.2</a> | PNAT2;PNAT-                           |            |             |              |
| GI_34335244-I | 79.5   | 74.3   | 83.7   | NMNAT2   | <a href="#">NM_170706.2</a> | PNAT2;PNAT-                           |            |             |              |
| GI_34335245-A | 2451.4 | 1908.6 | 1875   | NUP62    | <a href="#">NM_012346.3</a> | p62;MGC841;FLJ20822;DKFZp547L134      |            | nuclear     | nucleocyto   |
| GI_34335249-S | 1263.6 | 1459.7 | 1224.6 | NXF1     | <a href="#">NM_006362.3</a> | TAP;MEX67                             | RNA        | nucleus     | nucleocyto   |
| GI_34335250-A | 475.5  | 571.3  | 608.8  | DLGAP4   | <a href="#">NM_183006.1</a> | DAP4;SAPAP4;KIAA0964                  |            | membran     | cell-cell    |
| GI_34335250-I | 283.4  | 333    | 329.1  | DLGAP4   | <a href="#">NM_183006.1</a> | DAP4;SAPAP4;KIAA0964                  |            | membran     | cell-cell    |
| GI_34335252-I | 197.5  | 234.1  | 217.9  | DLGAP4   | <a href="#">NM_014902.2</a> | DAP4;SAPAP4;KIAA0964                  |            | membran     | cell-cell    |
| GI_34335254-S | 2609.8 | 2564.8 | 2649.4 | DCTN2    | <a href="#">NM_006400.3</a> | RBP50;DCTN50;DYNAMITIN                | motor      | kinetochor  | mitosis      |



|               |         |        |        |           |                             |                                      |             |             |              |
|---------------|---------|--------|--------|-----------|-----------------------------|--------------------------------------|-------------|-------------|--------------|
| GI_34335255-S | 94.6    | 106.2  | 98.6   | ADAM7     | <a href="#">NM_003817.1</a> | EAPI;GP-83                           | metalloen   | integral to | proteolysis  |
| GI_34335257-S | 840.4   | 1157.1 | 1636.3 | ATP6V0D1  | <a href="#">NM_004691.3</a> | P39;VATX;Vma6;ATP6D;ATP6DV;VPATPD    | hydrogen    | vacuolar    | proton       |
| GI_34335259-S | 637     | 525.9  | 1045   | PRIC285   | <a href="#">NM_033405.2</a> | FLJ00244;KIAA1769                    | ribonuclea  | nucleus     | regulation   |
| GI_34335261-I | 149.6   | 163.7  | 153    | PRKCBP1   | <a href="#">NM_183047.1</a> | RACK7;ZMYND8;KIAA1125;MGC31836       | DNA         |             | regulation   |
| GI_34335263-A | 995.4   | 1177.4 | 1493.2 | PRKCBP1   | <a href="#">NM_183048.1</a> | RACK7;ZMYND8;KIAA1125;MGC31836       | DNA         |             | regulation   |
| GI_34335267-S | 119.6   | 130.7  | 87.1   | PRND      | <a href="#">NM_012409.2</a> | DPL;PrPLP;DOPPEL;MGC41841;dJ1068H6.  |             |             | pathogene    |
| GI_34335269-A | 13077.9 | 13795  | 9511.9 | PRNP      | <a href="#">NM_183079.1</a> | CJD;PrP;ASCR;PRIP;PrPc;MGC26679;PrP2 |             |             | virulence    |
| GI_34335271-S | 590.9   | 502.3  | 427.8  | PROCR     | <a href="#">NM_006404.3</a> | CCCA;EPCR;CCD41;MGC23024;bA42O4.2    | receptor    | integral to | inflammat    |
| GI_34335273-I | 145.6   | 157.7  | 146.6  | P2RX7     | <a href="#">NM_002562.4</a> | P2X7;MGC20089                        | ATP-        | integral to | small        |
| GI_34335274-A | 97.9    | 108.4  | 95.5   | P2RX7     | <a href="#">NM_177427.2</a> | P2X7;MGC20089                        | ATP-        | integral to | small        |
| GI_34335275-S | 358.5   | 357.5  | 475.7  | POPDC3    | <a href="#">NM_022361.3</a> | POP3;MGC22671;bA355M14.1             | molecular   | integral to | biological_  |
| GI_34335276-S | 122.1   | 128.8  | 118    | PPP1R16B  | <a href="#">NM_015568.2</a> | TIMAP;ANKRD4;KIAA0823                | protein     | kinesin     | signal       |
| GI_34335277-I | 206.5   | 244.3  | 185.5  | PSMB8     | <a href="#">NM_004159.3</a> | LMP7;D6S216;RING10;D6S216E;MGC1491   | peptidase   | 26S         | proteolysis  |
| GI_34335278-A | 933.8   | 1184.9 | 806.8  | PSMB8     | <a href="#">NM_148919.2</a> | LMP7;D6S216;RING10;D6S216E;MGC1491   | peptidase   | 26S         | proteolysis  |
| GI_34335278-I | 448.3   | 495.8  | 378.3  | PSMB8     | <a href="#">NM_148919.2</a> | LMP7;D6S216;RING10;D6S216E;MGC1491   | peptidase   | 26S         | proteolysis  |
| GI_34335279-S | 3357.7  | 3924.7 | 3604.6 | PSMD7     | <a href="#">NM_002811.3</a> | P40;S12;MOV34                        | translation | proteasom   | translation  |
| GI_34335280-S | 252.7   | 337.6  | 364.8  | PSMD9     | <a href="#">NM_002813.4</a> | p27;MGC8644                          | molecular   | proteasom   | intracellula |
| GI_34335281-I | 108.9   | 111.9  | 99.4   | OLFM1     | <a href="#">NM_014279.2</a> | AMY;NOE1;OlfA;NOELIN                 |             |             | neurogene    |
| GI_34335282-A | 89.4    | 87.2   | 76.1   | OLFM1     | <a href="#">NM_058199.2</a> | AMY;NOE1;OlfA;NOELIN                 |             |             | neurogene    |
| GI_34335282-I | 117.4   | 140.5  | 114.2  | OLFM1     | <a href="#">NM_058199.2</a> | AMY;NOE1;OlfA;NOELIN                 |             |             | neurogene    |
| GI_34335283-I | 86.2    | 96.4   | 92.9   | OLFM1     | <a href="#">NM_006334.2</a> | AMY;NOE1;OlfA;NOELIN                 |             |             | neurogene    |
| GI_34335286-A | 1066.1  | 980.6  | 1687.3 | SLC35C2   | <a href="#">NM_173073.2</a> | CGI-                                 |             |             |              |
| GI_34335288-I | 104.6   | 111.3  | 115.8  | SLC35C2   | <a href="#">NM_173179.2</a> | CGI-                                 |             |             |              |
| GI_34335289-S | 649.5   | 842    | 796.7  | SEC22L1   | <a href="#">NM_004892.3</a> | ERS-24;SEC22B                        |             | endoplas    | ER to        |
| GI_34335290-S | 1811.5  | 2026.2 | 1806.8 | TOP3B     | <a href="#">NM_003935.3</a> |                                      | DNA         | nucleus     | chromoso     |
| GI_34335291-S | 861.9   | 941.5  | 813.3  | TST       | <a href="#">NM_003312.4</a> | RDS;MGC19578                         | thiosulfate | mitochond   | cyanate      |
| GI_34335395-S | 320.5   | 368.7  | 337.1  | BOK       | <a href="#">NM_032515.3</a> | BOKL;BCL2L9;MGC4631                  |             |             | induction    |
| GI_34365782-S | 144.2   | 173.5  | 157.2  | CHX10     | <a href="#">NM_182894.1</a> | RET1;HOX10                           | transcripti | nucleus     | vision       |
| GI_34365792-S | 231.7   | 251.8  | 195.9  | PRKWNK4   | <a href="#">NM_032387.2</a> | WNK4;PHA2B                           | cAMP-       |             | protein      |
| GI_34365798-S | 2342.2  | 2087.4 | 1725.2 | BET1L     | <a href="#">NM_016526.3</a> | GS15;BET1L1;HSPC197                  |             |             |              |
| GI_34398688-S | 103.5   | 111.4  | 103.2  | ADCYAP1R1 | <a href="#">NM_001118.3</a> | PACAPR;PACAPRI                       | receptor    | integral to | cell         |
| GI_34419629-S | 116.3   | 114.7  | 97.2   | CD1D      | <a href="#">NM_001766.2</a> |                                      | class I     | integral to | antimicrob   |
| GI_34419632-S | 226.8   | 260.6  | 225.2  | ZNF135    | <a href="#">NM_003436.2</a> | ZNF61;pHZ-17                         | transcripti | nucleus     | regulation   |
| GI_34419636-S | 100.5   | 103    | 96.9   | HLA-DOA   | <a href="#">NM_002119.2</a> | HLADZ;HLA-DNA;HLA-DZA                | class II    | plasma      |              |
| GI_34419638-S | 92      | 99.1   | 89.5   | ESSPL     | <a href="#">NM_183375.1</a> |                                      |             |             |              |
| GI_34419640-S | 102.6   | 95.3   | 100.4  | OVCH1     | <a href="#">NM_183378.1</a> | OVCH                                 |             |             |              |
| GI_34419642-S | 188.2   | 197.5  | 198.7  | TESSP1    | <a href="#">NM_183379.1</a> |                                      |             |             |              |
| GI_34419646-S | 463     | 880    | 396.4  | ARRDC4    | <a href="#">NM_183376.1</a> |                                      |             |             | sensory      |
| GI_34419648-S | 199.3   | 214.8  | 206.3  | CYP26C1   | <a href="#">NM_183374.1</a> |                                      |             |             |              |
| GI_34447228-S | 363.2   | 398.8  | 514.1  | STX16     | <a href="#">NM_003763.2</a> | SYN16;hsyn16                         | t-SNARE     | Golgi       | intra-Golgi  |
| GI_34447230-S | 127.9   | 145.3  | 117.3  | PAPSS2    | <a href="#">NM_004670.2</a> | SK2;ATPSK2                           | ATP         |             | nucleobas    |
| GI_34452172-S | 175.9   | 206.9  | 148.8  | ITGAX     | <a href="#">NM_000887.3</a> | CD11C                                | cell        | integrin    | histogene    |
| GI_34452680-S | 351.9   | 408.8  | 451    | RNF10     | <a href="#">NM_014868.3</a> | RIE2;KIAA0262                        |             |             |              |
| GI_34452682-S | 96.3    | 100.4  | 95     | RNF11     | <a href="#">NM_014372.3</a> | CGI-123;SID1669;MGC51169             | zinc ion    |             | oncogene     |

|               |        |        |        |          |                             |                                      |             |             |              |
|---------------|--------|--------|--------|----------|-----------------------------|--------------------------------------|-------------|-------------|--------------|
| GI_34452683-A | 106.4  | 94.9   | 100    | RNF12    | <a href="#">NM_016120.2</a> | RLIM;MGC15161;NY-REN-43              |             |             |              |
| GI_34452685-I | 72.1   | 81.9   | 68     | RNF12    | <a href="#">NM_183353.1</a> | RLIM;MGC15161;NY-REN-43              |             |             |              |
| GI_34452687-A | 148.5  | 132.3  | 133.9  | RGS11    | <a href="#">NM_183337.1</a> | RS11                                 | GTPase      | peripheral  | regulation   |
| GI_34452689-S | 201.6  | 230.7  | 205.3  | RGS16    | <a href="#">NM_002928.2</a> | RGS-R;A28-RGS14;A28-RGS14P           | GTPase      | peripheral  | regulation   |
| GI_34452691-A | 1197.8 | 1048   | 1159   | VPS28    | <a href="#">NM_016208.2</a> | MGC60323                             | protein     |             | intracellula |
| GI_34452692-I | 361.4  | 422.1  | 400.8  | VPS28    | <a href="#">NM_183057.1</a> | MGC60323                             | protein     |             | intracellula |
| GI_34452694-I | 254.1  | 283.6  | 247.7  | ACCN1    | <a href="#">NM_183377.1</a> | ACCN;BNC1;MDEG;ASIC2;BNaC1;ASIC2a;h  | amiloride-  | membran     | monovale     |
| GI_34452696-A | 295.1  | 353.4  | 296.1  | ACCN1    | <a href="#">NM_001094.4</a> | ACCN;BNC1;MDEG;ASIC2;BNaC1;ASIC2a;h  | amiloride-  | membran     | monovale     |
| GI_34452696-I | 190.1  | 229.1  | 203.8  | ACCN1    | <a href="#">NM_001094.4</a> | ACCN;BNC1;MDEG;ASIC2;BNaC1;ASIC2a;h  | amiloride-  | membran     | monovale     |
| GI_34452697-S | 6775.1 | 5960.4 | 4418.3 | ACTN4    | <a href="#">NM_004924.3</a> | FSGS;FSGS1                           | actin       | actin       | invasive     |
| GI_34452698-S | 1935.2 | 2318.8 | 2122   | ACTR3    | <a href="#">NM_005721.3</a> | ARP3                                 | structural  | Arp2/3      | cell         |
| GI_34452699-S | 562.7  | 481    | 455.7  | ABCC4    | <a href="#">NM_005845.2</a> | MRP4;MOATB;MOAT-B;EST170205          | nucleotide  | integral to | transport    |
| GI_34452700-S | 138.2  | 166.3  | 150.6  | ABCG8    | <a href="#">NM_022437.2</a> |                                      | ATP         | integral to | transport    |
| GI_34452701-S | 841.3  | 1057.3 | 933    | ANKH     | <a href="#">NM_054027.3</a> | ANK;CMDJ;HANK;MANK;CCAL2;CPPDD       | molecular   | integral to | phosphate    |
| GI_34452706-I | 117.5  | 132.7  | 120.3  | BRD8     | <a href="#">NM_139199.1</a> | P120;SMAP                            | ligand-     | nucleus     | cell         |
| GI_34452708-A | 505.6  | 626    | 655.8  | BRD8     | <a href="#">NM_183359.1</a> | P120;SMAP                            | ligand-     | nucleus     | cell         |
| GI_34452710-A | 120.8  | 121.8  | 111.5  | CADPS    | <a href="#">NM_183393.1</a> | CAPS;CAPS1;KIAA1121                  |             | cytosol     | exocytosis   |
| GI_34452712-I | 179    | 211.3  | 203.1  | CADPS    | <a href="#">NM_183394.1</a> | CAPS;CAPS1;KIAA1121                  |             | cytosol     | exocytosis   |
| GI_34452714-I | 100.9  | 116.2  | 117.3  | CADPS    | <a href="#">NM_003716.2</a> | CAPS;CAPS1;KIAA1121                  |             | cytosol     | exocytosis   |
| GI_34452716-A | 973    | 606.9  | 583.3  | CDC42EP1 | <a href="#">NM_007061.3</a> | CEP1;BORG5;MSE55;MGC15316            |             | extracellul | developm     |
| GI_34452718-S | 1228   | 568.2  | 501.2  | CEBPG    | <a href="#">NM_001806.2</a> | GPE1BP;IG/EBP-1                      | transcripti | nucleus     | regulation   |
| GI_34452719-S | 1905.8 | 1849.7 | 1573.3 | CRKL     | <a href="#">NM_005207.2</a> |                                      | protein-    |             | JNK          |
| GI_34452720-S | 395.3  | 423.5  | 417.3  | GABPA    | <a href="#">NM_002040.2</a> | NFT2;NRF2;NRF2A;E4TF1A;E4TF1-60      | protein     | nucleus     | transcripti  |
| GI_34452722-S | 77.3   | 91.6   | 94.6   | GABRA4   | <a href="#">NM_000809.2</a> |                                      | benzodiaz   | integral to | gamma-       |
| GI_34452724-S | 707.9  | 772.9  | 397.5  | GALNT4   | <a href="#">NM_003774.3</a> | GalNAcT4;GALNAC-T4                   | polypeptid  | Golgi       | carbohydr    |
| GI_34452728-I | 125.9  | 162.6  | 129.6  | PAIP1    | <a href="#">NM_006451.3</a> | MGC12360                             | RNA         | cytoplasm   | translation  |
| GI_34452729-A | 2546.6 | 2414.1 | 2000.4 | PAIP1    | <a href="#">NM_183323.1</a> | MGC12360                             | RNA         | cytoplasm   | translation  |
| GI_34452731-S | 220.2  | 251    | 318.6  | PREX1    | <a href="#">NM_020820.2</a> | KIAA1415                             | guanyl-     | cytosol     | intracellula |
| GI_34452733-I | 199.7  | 220.2  | 218.7  | PXMP4    | <a href="#">NM_007238.3</a> | PMP24                                |             | peroxisom   |              |
| GI_34452735-A | 163.5  | 167.1  | 169    | PXMP4    | <a href="#">NM_183397.1</a> | PMP24                                |             | peroxisom   |              |
| GI_34485705-I | 81.1   | 81.7   | 78.1   | RAB27A   | <a href="#">NM_183234.1</a> | GS2;RAM;RAB27;HsT18676               | RAB small   |             | protein      |
| GI_34485707-I | 76.6   | 98.7   | 82.9   | RAB27A   | <a href="#">NM_004580.3</a> | GS2;RAM;RAB27;HsT18676               | RAB small   |             | protein      |
| GI_34485708-I | 151.8  | 185.1  | 148.5  | RAB27A   | <a href="#">NM_183235.1</a> | GS2;RAM;RAB27;HsT18676               | RAB small   |             | protein      |
| GI_34485710-A | 1462.3 | 1629.9 | 1485.5 | RAB27A   | <a href="#">NM_183236.1</a> | GS2;RAM;RAB27;HsT18676               | RAB small   |             | protein      |
| GI_34485712-S | 2319.8 | 3380.2 | 2874.5 | RAB11A   | <a href="#">NM_004663.3</a> | YL8;MGC1490                          | RAB small   |             | small        |
| GI_34485713-I | 111.2  | 116.6  | 114.6  | RAB23    | <a href="#">NM_016277.3</a> | HSPC137;MGC8900                      | GTP         |             | small        |
| GI_34485715-A | 970.5  | 599.6  | 548.5  | RAB23    | <a href="#">NM_183227.1</a> | HSPC137;MGC8900                      | GTP         |             | small        |
| GI_34485715-I | 94.7   | 108.1  | 86.9   | RAB23    | <a href="#">NM_183227.1</a> | HSPC137;MGC8900                      | GTP         |             | small        |
| GI_34485717-S | 125.9  | 132.8  | 114    | RAB33A   | <a href="#">NM_004794.2</a> | RabS10;MGC1488                       | RAB small   |             | protein      |
| GI_34485718-S | 142.6  | 153.1  | 222.7  | E2F2     | <a href="#">NM_004091.2</a> | E2F-2                                | protein     | transcripti | transcripti  |
| GI_34485719-S | 135.8  | 143.9  | 147.1  | EML5     | <a href="#">NM_183387.1</a> | EMAP-2;HuEMAP-2                      |             |             |              |
| GI_34485721-S | 1093.4 | 1090.8 | 894.2  | KPNA3    | <a href="#">NM_002267.2</a> | SRP4;IPOA4;hSRP1;SRP1gamma           | nuclear     | importin,   | NLS-         |
| GI_34485723-A | 1950.8 | 2149.4 | 1607.8 | KRAS2    | <a href="#">NM_004985.3</a> | KRAS;RASK2;KI-RAS;C-K-RAS;K-RAS2A;K- | GTPase      |             | regulation   |
| GI_34485724-I | 153.8  | 202.5  | 160.3  | KRAS2    | <a href="#">NM_033360.2</a> | KRAS;RASK2;KI-RAS;C-K-RAS;K-RAS2A;K- | GTPase      |             | regulation   |

|               |         |        |        |          |                             |                                    |             |             |             |
|---------------|---------|--------|--------|----------|-----------------------------|------------------------------------|-------------|-------------|-------------|
| GI_34485725-S | 125.1   | 157.8  | 136.3  | GCNT1    | <a href="#">NM_001490.3</a> | G6NT;C2GNT;NACGT2;NAGCT2;C2GNT-L   | beta-1,3-   | Golgi       | O-linked    |
| GI_34485726-S | 105.2   | 101.5  | 98.9   | HEM1     | <a href="#">NM_005337.2</a> |                                    |             | membran     |             |
| GI_34485728-S | 1130.8  | 1207.7 | 986.6  | OSBP     | <a href="#">NM_002556.2</a> | OSBP1                              | oxysterol   | Golgi       | lipid       |
| GI_34485729-S | 366.3   | 377.1  | 299.2  | PRKY     | <a href="#">NM_002760.2</a> |                                    | protein     | nucleus     | protein     |
| GI_34486089-S | 16978.7 | 17819  | 16318  | OAZ1     | <a href="#">NM_004152.2</a> | OAZ                                | ornithine   |             | polyamine   |
| GI_34486091-S | 113.6   | 125.6  | 120.6  | ADCY5    | <a href="#">NM_183357.1</a> |                                    | calcium/ca  | integral to | cAMP        |
| GI_34486095-S | 1544.1  | 1569.3 | 1404   | RPL28    | <a href="#">NM_000991.3</a> |                                    | structural  | cytosolic   | protein     |
| GI_34486096-S | 1463.5  | 1263.5 | 1193.9 | TEF      | <a href="#">NM_003216.2</a> |                                    | RNA         | nucleus     | regulation  |
| GI_34536828-I | 216.3   | 259.7  | 219.5  | C21orf80 | <a href="#">NM_015227.2</a> | KIAA0958;DKFZp434E171              |             |             |             |
| GI_34556190-A | 91      | 99.7   | 110.6  | COH1     | <a href="#">NM_181661.1</a> | CHS1;KIAA0532;DKFZp313I0811        | metallope   | membran     | transport   |
| GI_34556190-I | 177     | 205.8  | 219.7  | COH1     | <a href="#">NM_181661.1</a> | CHS1;KIAA0532;DKFZp313I0811        | metallope   | membran     | transport   |
| GI_34556206-I | 137.2   | 147.2  | 152.8  | TSC22    | <a href="#">NM_183422.1</a> | MGC17597                           | transcripti | nucleus     | transcripti |
| GI_34577046-I | 120     | 145.2  | 115.1  | BPAG1    | <a href="#">NM_183380.1</a> | BPA;BP240;CATX-                    |             | basement    | cytoskelet  |
| GI_34577050-A | 133     | 128.5  | 120.8  | BPAG1    | <a href="#">NM_001723.3</a> | BPA;BP240;CATX-                    |             | basement    | cytoskelet  |
| GI_34577050-I | 110.7   | 114.8  | 120.4  | BPAG1    | <a href="#">NM_001723.3</a> | BPA;BP240;CATX-                    |             | basement    | cytoskelet  |
| GI_34577051-S | 1009.8  | 3083.6 | 1522.1 | F2RL1    | <a href="#">NM_005242.3</a> | PAR2;GPR11                         | G-protein   | Golgi       | cytosolic   |
| GI_34577053-S | 136.5   | 247    | 142.5  | F2RL2    | <a href="#">NM_004101.2</a> | PAR3                               | thrombin    | integral to | phosphati   |
| GI_34577054-S | 436     | 415.2  | 461    | FBXO30   | <a href="#">NM_032145.3</a> | MGC21674                           | zinc ion    |             |             |
| GI_34577056-S | 105.6   | 103.4  | 95.6   | FLRT1    | <a href="#">NM_013280.3</a> |                                    | receptor    | integral to | biological_ |
| GI_34577058-S | 209.6   | 234.3  | 187.3  | ADFP     | <a href="#">NM_001122.2</a> | ADRP;MGC10598                      |             | lipid       |             |
| GI_34577060-S | 126.6   | 134.8  | 133.4  | ADH1B    | <a href="#">NM_000668.3</a> | ADH2                               | alcohol     |             | ethanol     |
| GI_34577062-S | 269.5   | 261.7  | 274.2  | ADSS     | <a href="#">NM_001126.2</a> | ADEH;MGC20404                      | adenylosu   |             | AMP         |
| GI_34577064-S | 130.5   | 150.6  | 129    | AGTRL1   | <a href="#">NM_005161.2</a> | APJ;MGC45246                       | G-protein   | integral to | G-protein   |
| GI_34577067-S | 382.1   | 890.9  | 125.7  | ANGPTL2  | <a href="#">NM_012098.2</a> | ARP2;HARP;MGC8889                  | receptor    | kinesin     | developm    |
| GI_34577072-A | 284.8   | 340.4  | 427.8  | PTE1     | <a href="#">NM_183386.1</a> | hTE;HNAACTE;hACTE-III              | acyl-CoA    | peroxisom   | lipid       |
| GI_34577076-A | 151     | 181.6  | 180.5  | RBL1     | <a href="#">NM_183404.1</a> | PRB1;p107;CP107;MGC40006           |             | nucleus     | regulation  |
| GI_34577076-I | 96.5    | 96.2   | 97     | RBL1     | <a href="#">NM_183404.1</a> | PRB1;p107;CP107;MGC40006           |             | nucleus     | regulation  |
| GI_34577078-I | 248.4   | 271.6  | 297.4  | RBL1     | <a href="#">NM_002895.2</a> | PRB1;p107;CP107;MGC40006           |             | nucleus     | regulation  |
| GI_34577080-S | 200     | 247.8  | 238.4  | RBPSUHL  | <a href="#">NM_014276.2</a> | RBP-L                              | transcripti | nucleus     | signal      |
| GI_34577082-A | 8692.7  | 10379  | 8365.1 | RSU1     | <a href="#">NM_152724.2</a> | RSP-1;FLJ31034                     |             |             | oncogene    |
| GI_34577084-I | 332.1   | 392    | 324    | RSU1     | <a href="#">NM_012425.3</a> | RSP-1;FLJ31034                     |             |             | oncogene    |
| GI_34577085-I | 99.5    | 96.9   | 90.2   | RNF13    | <a href="#">NM_007282.3</a> | RZF;MGC13689                       | peptidase   | nucleus     | proteolysis |
| GI_34577092-A | 1917.2  | 2237.3 | 2301   | RNF13    | <a href="#">NM_183384.1</a> | RZF;MGC13689                       | peptidase   | nucleus     | proteolysis |
| GI_34577097-A | 996.6   | 1021.5 | 780    | RNF14    | <a href="#">NM_183399.1</a> | ARA54;HFB30;HRIHFB2038             | transcripti | kinesin     | signal      |
| GI_34577101-I | 115.4   | 108.8  | 123.3  | RNF14    | <a href="#">NM_183401.1</a> | ARA54;HFB30;HRIHFB2038             | transcripti | kinesin     | signal      |
| GI_34577103-S | 1459.5  | 1353.2 | 2056.3 | RAB22A   | <a href="#">NM_020673.2</a> | MGC16770                           | GTP         |             | small       |
| GI_34577104-A | 572.8   | 444.1  | 692.2  | RNPC1    | <a href="#">NM_183425.1</a> | SEB4B;SEB4D;HSRNASEB;dJ800J21.2    | RNA         |             |             |
| GI_34577108-I | 109.2   | 126.3  | 115.1  | ALDOA    | <a href="#">NM_000034.2</a> | ALDA;MGC10942;MGC17716;MGC17767    | fructose-   |             | fructose    |
| GI_34577109-A | 16186.5 | 17255  | 13219  | ALDOA    | <a href="#">NM_184041.1</a> | ALDA;MGC10942;MGC17716;MGC17767    | fructose-   |             | fructose    |
| GI_34577109-I | 8159.2  | 10971  | 8607.5 | ALDOA    | <a href="#">NM_184041.1</a> | ALDA;MGC10942;MGC17716;MGC17767    | fructose-   |             | fructose    |
| GI_34577111-I | 125.6   | 142.4  | 130.2  | ALDOA    | <a href="#">NM_184043.1</a> | ALDA;MGC10942;MGC17716;MGC17767    | fructose-   |             | fructose    |
| GI_34577117-S | 155.8   | 176.3  | 154.1  | KIAA1117 | <a href="#">NM_015018.2</a> | dJ202D23.2                         |             |             |             |
| GI_34577119-S | 308.5   | 306.4  | 272.9  | MTRF1    | <a href="#">NM_004294.2</a> | RF1;MTTRF1;MGC47721                | translation | mitochond   | regulation  |
| GI_34577121-S | 2867.4  | 1899.2 | 1910.7 | NFKB1    | <a href="#">NM_003998.2</a> | KBF1;EBP-1;MGC54151;NFKB-p50;NFKB- | transcripti | cytoplasm   | response    |

|               |        |        |        |           |                             |                                       |             |                       |
|---------------|--------|--------|--------|-----------|-----------------------------|---------------------------------------|-------------|-----------------------|
| GI_34577123-S | 2541.5 | 2970.3 | 1294   | PYGB      | <a href="#">NM_002862.3</a> | MGC9213                               | glycogen    | glycogen              |
| GI_34594658-S | 442.9  | 426.2  | 399.4  | FLJ39616  | <a href="#">NM_016534.2</a> |                                       |             |                       |
| GI_34594663-S | 104.2  | 116    | 103.6  | GPSM1     | <a href="#">NM_015597.2</a> | AGS3;DKFZP727I051                     |             |                       |
| GI_34594668-S | 904.6  | 975.4  | 876.9  | HCCA2     | <a href="#">NM_053005.2</a> | MOB2                                  |             |                       |
| GI_34732708-I | 138.5  | 155.5  | 142.9  | MECT1     | <a href="#">NM_015321.1</a> | TORC1;WAMTP1;FLJ14027;KIAA0616        |             |                       |
| GI_34734061-A | 96.5   | 110    | 109.7  | FBLN1     | <a href="#">NM_001996.2</a> | FBLN                                  | extracellul | extracellul           |
| GI_34734061-I | 114.4  | 210.2  | 111.1  | FBLN1     | <a href="#">NM_001996.2</a> | FBLN                                  | extracellul | extracellul           |
| GI_34734063-I | 130.5  | 163.2  | 145.4  | FBLN1     | <a href="#">NM_006485.2</a> | FBLN                                  | extracellul | extracellul           |
| GI_34734065-I | 91.2   | 92.4   | 97.8   | FBLN1     | <a href="#">NM_006486.2</a> | FBLN                                  | extracellul | extracellul           |
| GI_34734067-I | 102.5  | 126.9  | 121.6  | FBLN1     | <a href="#">NM_006487.2</a> | FBLN                                  | extracellul | extracellul           |
| GI_34734069-S | 113.1  | 110.6  | 111.4  | GABRA3    | <a href="#">NM_000808.2</a> | MGC33793                              | benzodiaz   | integral to gamma-    |
| GI_34734070-S | 172.4  | 174.6  | 172.2  | GABRD     | <a href="#">NM_000815.2</a> | MGC45284                              | GABA-A      | integral to small     |
| GI_34734072-I | 135.3  | 157.1  | 143    | SLC22A18  | <a href="#">NM_183233.1</a> | HET;ITM;BWR1A;IMPT1;TSSC5;ORCTL2;B    | organic     | integral to drug      |
| GI_34734074-A | 3527.2 | 3567   | 3452.9 | SLC22A18  | <a href="#">NM_002555.3</a> | HET;ITM;BWR1A;IMPT1;TSSC5;ORCTL2;B    | organic     | integral to drug      |
| GI_34734074-I | 142    | 154.8  | 132.3  | SLC22A18  | <a href="#">NM_002555.3</a> | HET;ITM;BWR1A;IMPT1;TSSC5;ORCTL2;B    | organic     | integral to drug      |
| GI_34734076-S | 874    | 532.4  | 613.4  | FOSL1     | <a href="#">NM_005438.2</a> | FRA1;fra-1                            | transcripti | nucleus response      |
| GI_34734078-S | 526.9  | 566.2  | 454.6  | FZD6      | <a href="#">NM_003506.2</a> | Hfz6                                  | frizzled    | integral to establish |
| GI_34740324-S | 187.5  | 219.2  | 156.3  | LOC158135 | <a href="#">NM_194252.1</a> |                                       | tubulin-    | protein               |
| GI_34740326-S | 333.3  | 437.9  | 398.6  | LOC91752  | <a href="#">NM_194250.1</a> |                                       |             |                       |
| GI_34740328-S | 3309.1 | 4325.7 | 3192.1 | hnRNPA3   | <a href="#">NM_194247.1</a> |                                       |             |                       |
| GI_34740330-I | 132.5  | 156.7  | 135.2  | OTOF      | <a href="#">NM_194248.1</a> | DFNB6;DFNB9;NSRD9;FER1L2              | vesicle     | membran hearing       |
| GI_34740332-S | 157.8  | 177.9  | 149.9  | GPR151    | <a href="#">NM_194251.1</a> | GPCR;PGR7                             | receptor    | integral to G-protein |
| GI_34740336-S | 98.9   | 103.7  | 98.3   | CREB3L2   | <a href="#">NM_194071.1</a> | BBF2H7;DKFZp586F2423;DKFZp686O1916    |             |                       |
| GI_34740338-S | 327.7  | 380.8  | 338.8  | DND1      | <a href="#">NM_194249.1</a> | RBMS4;MGC34750                        | nucleic     |                       |
| GI_34761063-S | 1024.6 | 1446.4 | 1107.5 | PIK3C3    | <a href="#">NM_002647.2</a> |                                       | 1-          | phosphoin nonselecti  |
| GI_34787408-S | 324.1  | 376.2  | 522.5  | KIAA1219  | <a href="#">NM_020336.1</a> |                                       |             |                       |
| GI_34787414-S | 764.3  | 809.5  | 722.1  | MGC23401  | <a href="#">NM_144982.3</a> | KIAA0546;DKFZp686A0722                |             | intracellula RNA      |
| GI_34808709-A | 292.8  | 290.7  | 288.8  | SLC19A1   | <a href="#">NM_194255.1</a> | CHMD;FOLT;IFC1;REFC;RFC1              | folate      | membran folate        |
| GI_34823294-I | 149.6  | 156.9  | 152.8  | SLC19A1   | <a href="#">NM_003056.2</a> | CHMD;FOLT;IFC1;REFC;RFC1              | folate      | membran folate        |
| GI_34850056-S | 122.6  | 127.4  | 121.4  | HILS1     | <a href="#">NM_194072.1</a> |                                       |             |                       |
| GI_34850060-S | 101.1  | 102.1  | 99.5   | STMN2     | <a href="#">NM_007029.2</a> | SCG10;SGC10;SCGN10                    | cytoskelet  | kinesin intracellula  |
| GI_34850063-S | 859.5  | 866.3  | 879.1  | NDUFC1    | <a href="#">NM_002494.2</a> | KFYI                                  | NADH        | NADH mitochond        |
| GI_34850064-S | 103.5  | 109.7  | 93.6   | TNP1      | <a href="#">NM_003284.2</a> | TP1                                   | DNA         | chromoso chromoso     |
| GI_34850073-S | 975.8  | 629.7  | 864.1  | CGI-150   | <a href="#">NM_016080.2</a> |                                       |             |                       |
| GI_34850075-S | 743.5  | 723.2  | 848    | RAB13     | <a href="#">NM_002870.2</a> |                                       | RAB small   | tight vesicle-        |
| GI_34878689-A | 559.5  | 415.5  | 358.6  | CIAS1     | <a href="#">NM_183395.1</a> | FCU;MWS;FCAS;NALP3;C1orf7;PYPAF1;All/ | apoptosis   | cellular_co induction |
| GI_34878691-S | 573.1  | 656.7  | 561    | CALCRL    | <a href="#">NM_005795.2</a> | CRLR;CGRPR                            | G-protein   | integral to G-protein |
| GI_34878692-I | 186.5  | 216.1  | 188.8  | CIAS1     | <a href="#">NM_004895.3</a> | FCU;MWS;FCAS;NALP3;C1orf7;PYPAF1;All/ | apoptosis   | cellular_co induction |
| GI_34878694-I | 148.3  | 174.1  | 162.2  | LKAP      | <a href="#">NM_014647.1</a> | KIAA0430;A-362G6.1                    |             |                       |
| GI_34878696-A | 1142.4 | 1412.6 | 1318.2 | LKAP      | <a href="#">NM_019081.2</a> | KIAA0430;A-362G6.1                    |             |                       |
| GI_34878708-I | 136    | 149.8  | 136.9  | PAX2      | <a href="#">NM_003988.2</a> |                                       | transcripti | nucleus axonogen      |
| GI_34878715-A | 106.3  | 112.8  | 113.9  | PAX2      | <a href="#">NM_003989.2</a> |                                       | transcripti | nucleus axonogen      |
| GI_34878734-I | 100.7  | 113.4  | 103.3  | FBX30     | <a href="#">NM_033182.4</a> | FBG3;MGC14140                         |             |                       |
| GI_34878748-I | 104.1  | 128    | 111    | FBX30     | <a href="#">NM_183412.1</a> | FBG3;MGC14140                         |             |                       |

|               |        |        |        |             |                             |                                  |             |             |                         |
|---------------|--------|--------|--------|-------------|-----------------------------|----------------------------------|-------------|-------------|-------------------------|
| GI_34878752-A | 84.1   | 90.8   | 85.4   | FBX30       | <a href="#">NM_183413.1</a> | FBG3;MGC14140                    |             |             |                         |
| GI_34878756-A | 128.1  | 134.4  | 109    | FBXO25      | <a href="#">NM_012173.3</a> | FBX25;MGC20256;MGC51975          | ubiquitin   |             | ubiquitin-              |
| GI_34878776-S | 654.3  | 650.2  | 671.2  | RNF20       | <a href="#">NM_019592.5</a> | BRE1A;FLJ11189;FLJ20382;KIAA2779 |             |             |                         |
| GI_34878786-S | 255.8  | 288.8  | 271.9  | RNF25       | <a href="#">NM_022453.2</a> | AO7;FLJ13906                     | ligase      |             |                         |
| GI_34878803-S | 556.6  | 662.2  | 827    | RNF26       | <a href="#">NM_032015.3</a> | MGC2642                          | zinc ion    |             | cellular_co biological_ |
| GI_34878820-I | 94.7   | 99.6   | 96.8   | RNF29       | <a href="#">NM_033058.2</a> | MURF-2                           |             |             |                         |
| GI_34878851-A | 105.1  | 122.8  | 100.3  | RNF29       | <a href="#">NM_184087.1</a> | MURF-2                           |             |             |                         |
| GI_34878859-I | 132.4  | 158.9  | 143    | RNF30       | <a href="#">NM_032546.2</a> | MURF;MURF-3                      |             |             |                         |
| GI_34878869-A | 147.5  | 153.1  | 150.7  | RNF30       | <a href="#">NM_187841.1</a> | MURF;MURF-3                      |             |             |                         |
| GI_34878876-S | 117.2  | 163.7  | 117.7  | NRN1        | <a href="#">NM_016588.2</a> | NRN;MGC44811                     |             |             |                         |
| GI_34878895-S | 96.7   | 117.1  | 96.2   | GPR62       | <a href="#">NM_080865.2</a> | GPCR8;MGC26943                   | G-protein   | integral to | G-protein               |
| GI_34878901-S | 1901.7 | 1649.7 | 1649.1 | PCM1        | <a href="#">NM_006197.2</a> | PTC4                             |             |             | centrosom               |
| GI_34878903-S | 156.9  | 197.5  | 165.2  | SYCP1       | <a href="#">NM_003176.2</a> | SCP1;HOM-TES-14                  | DNA         |             | synaptone synapsis      |
| GI_34915989-S | 176.4  | 487.5  | 194.8  | RBPMS2      | <a href="#">NM_194272.1</a> |                                  |             |             |                         |
| GI_34915991-S | 164    | 192.9  | 180.1  | MOPT        | <a href="#">NM_194270.1</a> | BLOCK27                          |             |             |                         |
| GI_34915997-S | 272.9  | 282.6  | 261.8  | FLJ20209    | <a href="#">NM_194276.1</a> |                                  |             |             |                         |
| GI_34915999-S | 117.1  | 132.1  | 120.5  | LOC90167    | <a href="#">NM_194277.1</a> |                                  |             |             |                         |
| GI_34916001-S | 146.4  | 172.2  | 164.7  | LOC125476   | <a href="#">NM_194281.1</a> |                                  |             |             |                         |
| GI_34916003-S | 168.6  | 185.8  | 178.2  | LOC134218   | <a href="#">NM_194283.1</a> |                                  | RNA         | nucleus     | electron                |
| GI_34916005-S | 106.4  | 118.8  | 104    | CLDN23      | <a href="#">NM_194284.1</a> |                                  | structural  | tight       | regulation              |
| GI_34916007-S | 132.8  | 151.6  | 141    | LOC144747   | <a href="#">NM_194286.1</a> |                                  |             |             |                         |
| GI_34916009-S | 88.4   | 91.4   | 89.4   | LOC145497   | <a href="#">NM_194287.1</a> |                                  |             |             |                         |
| GI_34916011-S | 249.2  | 259.1  | 249.4  | LOC146712   | <a href="#">NM_194288.1</a> |                                  |             |             |                         |
| GI_34916013-S | 106.3  | 189.4  | 155    | LOC152195   | <a href="#">NM_194289.1</a> |                                  |             |             |                         |
| GI_34916015-S | 94.4   | 93.4   | 83.6   | DKFZp43411C | <a href="#">NM_194295.1</a> |                                  |             |             |                         |
| GI_34916017-S | 122.4  | 129.4  | 126.1  | LOC153684   | <a href="#">NM_194290.1</a> |                                  |             |             |                         |
| GI_34916021-S | 95.2   | 94.9   | 81.5   | LOC221711   | <a href="#">NM_194299.1</a> |                                  |             |             |                         |
| GI_34916023-S | 4767.4 | 4590.8 | 3812   | LOC169355   | <a href="#">NM_194294.1</a> |                                  |             |             |                         |
| GI_34916025-S | 84.8   | 103.1  | 88.8   | DKFZp4340C  | <a href="#">NM_194302.1</a> |                                  |             |             |                         |
| GI_34916027-S | 254.3  | 203.2  | 95.2   | SLC16A9     | <a href="#">NM_194298.1</a> | C10orf36;FLJ43803                |             |             |                         |
| GI_34916029-S | 122.5  | 120.5  | 106.1  | LOC283031   | <a href="#">NM_194304.1</a> |                                  |             |             |                         |
| GI_34916031-S | 106.9  | 105.1  | 99.4   | LOC223075   | <a href="#">NM_194300.1</a> |                                  |             |             |                         |
| GI_34916035-S | 144.9  | 204.5  | 181.4  | C10orf39    | <a href="#">NM_194303.1</a> | FLJ37857                         |             |             |                         |
| GI_34916037-S | 81.5   | 101.4  | 87.1   | LOC284837   | <a href="#">NM_194310.1</a> |                                  |             |             |                         |
| GI_34916039-S | 98.1   | 89.9   | 89.4   | LOC283711   | <a href="#">NM_194305.1</a> |                                  |             |             |                         |
| GI_34916041-S | 363.4  | 327.3  | 405.1  | LOC339768   | <a href="#">NM_194312.1</a> |                                  |             |             |                         |
| GI_34916043-S | 108.1  | 137.3  | 97     | C21orf125   | <a href="#">NM_194309.1</a> | PRED49;FLJ38036                  |             |             |                         |
| GI_34916045-S | 110.4  | 121.6  | 112.3  | FRBZ1       | <a href="#">NM_194314.1</a> |                                  | protein     |             |                         |
| GI_34916047-S | 116.3  | 144.4  | 135.9  | LOC338769   | <a href="#">NM_194311.1</a> |                                  |             |             |                         |
| GI_34916049-S | 114.3  | 117.9  | 129.3  | C9orf48     | <a href="#">NM_194313.1</a> | FLJ43884                         |             |             |                         |
| GI_34916053-S | 120.4  | 107.6  | 107    | MLR1        | <a href="#">NM_153686.4</a> | FLJ30696                         |             |             |                         |
| GI_34916054-S | 342.5  | 375.4  | 353.6  | KIRREL      | <a href="#">NM_018240.3</a> | NEPH1;FLJ10845                   |             |             |                         |
| GI_34916055-I | 496.8  | 696.3  | 1063   | KNS2        | <a href="#">NM_005552.3</a> | KLC;KLC1;KNS2A                   | motor       | kinesin     | microtubul              |
| GI_34916057-S | 318.1  | 342.2  | 423.1  | KLF4        | <a href="#">NM_004235.3</a> | EZF;GKLF                         | transcripti |             | mesoderm                |

|               |        |        |        |            |                             |                                    |             |              |              |
|---------------|--------|--------|--------|------------|-----------------------------|------------------------------------|-------------|--------------|--------------|
| GI_34932234-S | 106.8  | 118.2  | 129    | ZNF228     | <a href="#">NM_013380.2</a> |                                    | DNA         | nucleus      | regulation   |
| GI_34932413-S | 2390.9 | 2803.6 | 2601.9 | NONO       | <a href="#">NM_007363.3</a> | P54;NMT55;NRB54;P54NRB             | pre-mRNA    | nucleus      | mRNA         |
| GI_34932495-S | 146.9  | 164    | 140.9  | BTN3A2     | <a href="#">NM_007047.2</a> | BTF4;BT3.2                         |             |              |              |
| GI_34996482-S | 144.9  | 146.6  | 138.4  | DKFZp686L1 | <a href="#">NM_194282.1</a> |                                    |             |              |              |
| GI_34996486-S | 2070.3 | 2001.9 | 2265.2 | HBLD1      | <a href="#">NM_194279.1</a> | c14_5557                           |             | molecular    |              |
| GI_34996490-S | 904.6  | 888.2  | 925.5  | LOC124446  | <a href="#">NM_194280.1</a> |                                    |             |              |              |
| GI_34996518-S | 107.9  | 106.9  | 110.3  | GALIG      | <a href="#">NM_194327.1</a> |                                    |             |              |              |
| GI_34996520-S | 137.6  | 129.7  | 143.3  | ZNF30      | <a href="#">NM_194325.1</a> | KOX28;DKFZp686N19164               | DNA         | nucleus      | regulation   |
| GI_34996522-S | 159.7  | 203.3  | 161.3  | MGC52057   | <a href="#">NM_194317.1</a> |                                    |             |              |              |
| GI_34996524-S | 380.8  | 503.9  | 429.9  | ZNF542     | <a href="#">NM_194319.1</a> | DKFZp686B2197                      |             |              |              |
| GI_34996526-S | 1482.7 | 1361.7 | 1210.2 | MGC52010   | <a href="#">NM_194326.1</a> |                                    |             |              |              |
| GI_34996530-S | 472.1  | 621.9  | 740.8  | B3GTL      | <a href="#">NM_194318.1</a> |                                    |             |              |              |
| GI_34996532-S | 138.7  | 158.1  | 136.2  | MGC39900   | <a href="#">NM_194324.1</a> |                                    | actin       | cytoplasm    | cytoskelet   |
| GI_34996534-S | 113.9  | 117.9  | 108.6  | ZNF169     | <a href="#">NM_194320.1</a> | MGC51961                           | transcripti | nucleus      | regulation   |
| GI_35038161-S | 374.2  | 489.4  | 424.3  | RREB1      | <a href="#">NM_002955.3</a> | FINB;LZ321;RREB-1                  | transcripti |              | RAS          |
| GI_35038527-S | 249.7  | 306.3  | 298.5  | PASK       | <a href="#">NM_015148.2</a> | STK37;PASKIN;KIAA0135;DKFZP434O051 | ATP         |              | protein      |
| GI_35038563-S | 333.6  | 383.8  | 238.1  | KIAA0922   | <a href="#">NM_015196.2</a> | DKFZp586H1322                      |             |              |              |
| GI_35038578-S | 753.2  | 878.8  | 767.7  | LOC157378  | <a href="#">NM_194291.1</a> |                                    |             |              |              |
| GI_35038600-S | 186.6  | 178.7  | 179.6  | DKFZp761A0 | <a href="#">NM_194292.1</a> |                                    |             |              |              |
| GI_35249735-A | 199.4  | 248.1  | 194    | ZNF226     | <a href="#">NM_015919.2</a> |                                    |             |              |              |
| GI_35249735-I | 665.1  | 873.7  | 598.5  | ZNF226     | <a href="#">NM_015919.2</a> |                                    |             |              |              |
| GI_35250685-S | 544.5  | 312.4  | 263.6  | USP36      | <a href="#">NM_025090.2</a> | FLJ12851;KIAA1453                  | cysteine-   | nucleus      | ubiquitin-   |
| GI_35250772-S | 6062.8 | 6389.1 | 6698.8 | DKFZP564J1 | <a href="#">NM_018457.2</a> |                                    |             |              |              |
| GI_35250828-S | 1175   | 1963   | 1867.3 | COPG       | <a href="#">NM_016128.3</a> | COPG1                              | protein     | membran      | intracellula |
| GI_35493718-I | 79.5   | 87.1   | 84.2   | COH1       | <a href="#">NM_184042.1</a> | CHS1;KIAA0532;DKFZp313I0811        | metallope   | membran      | transport    |
| GI_35493724-I | 137.5  | 164.1  | 137.1  | COH1       | <a href="#">NM_015243.2</a> | CHS1;KIAA0532;DKFZp313I0811        | metallope   | membran      | transport    |
| GI_35493732-I | 97.3   | 108.4  | 106.7  | MOCS2      | <a href="#">NM_004531.3</a> | MPTS;MCBPE;MOCO1                   | catalytic   |              | Mo-          |
| GI_35493763-A | 494.2  | 402.6  | 344.5  | MOCS2      | <a href="#">NM_176806.2</a> | MPTS;MCBPE;MOCO1                   | catalytic   |              | Mo-          |
| GI_35493773-S | 87.1   | 92.6   | 81.1   | RNF18      | <a href="#">NM_020358.2</a> |                                    | zinc ion    | intracellula |              |
| GI_35493781-A | 1446.2 | 1309.2 | 1248   | RNF19      | <a href="#">NM_015435.3</a> | DORFIN;DKFZp566B1346               | transcripti | centrosom    | microtubul   |
| GI_35493781-I | 145.4  | 157.8  | 165.6  | RNF19      | <a href="#">NM_015435.3</a> | DORFIN;DKFZp566B1346               | transcripti | centrosom    | microtubul   |
| GI_35493800-I | 162.3  | 187.3  | 163.8  | RNF19      | <a href="#">NM_183419.1</a> | DORFIN;DKFZp566B1346               | transcripti | centrosom    | microtubul   |
| GI_35493816-I | 237.9  | 262    | 275.3  | RNPC2      | <a href="#">NM_184237.1</a> | HCC1;CAPER;CC1.3;CC1.4             | pre-mRNA    | nucleoplas   | RNA          |
| GI_35493837-A | 88.4   | 106.9  | 99.2   | RNPC2      | <a href="#">NM_004902.2</a> | HCC1;CAPER;CC1.3;CC1.4             | pre-mRNA    | nucleoplas   | RNA          |
| GI_35493852-I | 105.2  | 107.1  | 117.4  | OTOF       | <a href="#">NM_194322.1</a> | DFNB6;DFNB9;NSRD9;FER1L2           | vesicle     | membran      | hearing      |
| GI_35493859-A | 288.2  | 315.2  | 296.5  | OTOF       | <a href="#">NM_194323.1</a> | DFNB6;DFNB9;NSRD9;FER1L2           | vesicle     | membran      | hearing      |
| GI_35493877-S | 691.7  | 609.5  | 578.5  | RELB       | <a href="#">NM_006509.2</a> | I-REL                              | transcripti | nucleus      | regulation   |
| GI_35493898-S | 97.1   | 105.9  | 96.4   | REM        | <a href="#">NM_014012.4</a> | GES;MGC48669                       | small       |              | small        |
| GI_35493905-S | 2405.5 | 2217.2 | 895.4  | RIN2       | <a href="#">NM_018993.2</a> | RASSF4                             | GTPase      |              | neuropepti   |
| GI_35493915-S | 3494.2 | 5606.9 | 8250   | RPN2       | <a href="#">NM_002951.2</a> | RIBIIR;RPN-II                      | oligosacch  | endoplas     | protein      |
| GI_35493922-S | 577    | 496.4  | 642.6  | PCNT2      | <a href="#">NM_006031.3</a> | KEN;PCN;PCNT;PCNTB;PCTN2;KIAA0402  | structural  | centrosom    | microtubul   |
| GI_35493938-S | 160    | 154.1  | 146.1  | ProSAPiP1  | <a href="#">NM_014731.2</a> | KIAA0552                           |             | kinesin      |              |
| GI_35493944-I | 100.4  | 102.2  | 94.1   | UBE3B      | <a href="#">NM_183414.1</a> | DKFZp586K2123;DKFZp686A1051        | ubiquitin-  | intracellula | ubiquitin    |
| GI_35493951-A | 726.1  | 736.7  | 565.3  | UBE3B      | <a href="#">NM_183415.1</a> | DKFZp586K2123;DKFZp686A1051        | ubiquitin-  | intracellula | ubiquitin    |

|               |        |        |        |          |                             |                                    |              |             |            |
|---------------|--------|--------|--------|----------|-----------------------------|------------------------------------|--------------|-------------|------------|
| GI_35493986-I | 152.5  | 158.3  | 148.2  | UBE2I    | <a href="#">NM_194259.1</a> | P18;UBC9;C358B7.1                  | ubiquitin    | synaptone   | ubiquitin- |
| GI_35493995-A | 5785.5 | 5396.9 | 5698   | UBE2I    | <a href="#">NM_194260.1</a> | P18;UBC9;C358B7.1                  | ubiquitin    | synaptone   | ubiquitin- |
| GI_35493995-I | 108.9  | 120.5  | 121.3  | UBE2I    | <a href="#">NM_194260.1</a> | P18;UBC9;C358B7.1                  | ubiquitin    | synaptone   | ubiquitin- |
| GI_35494002-I | 195.8  | 230.5  | 198.8  | UBE2I    | <a href="#">NM_194261.1</a> | P18;UBC9;C358B7.1                  | ubiquitin    | synaptone   | ubiquitin- |
| GI_36030882-S | 673.8  | 801.7  | 692.2  | RP42     | <a href="#">NM_020640.2</a> | SCRO                               |              |             |            |
| GI_36030904-S | 657.6  | 594.3  | 757.4  | KIAA0274 | <a href="#">NM_014845.4</a> | SAC3;hSac3;dJ24914.1               |              |             |            |
| GI_36030945-S | 1184.9 | 870.2  | 736.8  | LOC90806 | <a href="#">NM_144567.2</a> |                                    |              |             |            |
| GI_36030972-S | 413.8  | 373.8  | 412.7  | UBXD4    | <a href="#">NM_181713.3</a> |                                    |              |             |            |
| GI_36030993-S | 496    | 639.8  | 514.5  | FEM1C    | <a href="#">NM_020177.2</a> | FEM1A;KIAA1785;EUROIMAGE686608;EUR |              |             |            |
| GI_36031015-S | 150.2  | 145.9  | 139.9  | FLJ10188 | <a href="#">NM_018017.2</a> | FLJ35301                           |              |             |            |
| GI_36031099-S | 101.2  | 113.5  | 108.5  | CALML3   | <a href="#">NM_005185.2</a> | CLP                                | calcium      |             |            |
| GI_36054052-S | 118.2  | 131.9  | 113.5  | FABP7    | <a href="#">NM_001446.3</a> | MRG;FABPB;B-FABP                   | intracellula |             | negative   |
| GI_36054077-S | 189.4  | 211.2  | 208.8  | FDX1     | <a href="#">NM_004109.3</a> | ADX;FDX                            | adrenodox    | mitochond   | vitamin    |
| GI_36054106-S | 94.6   | 105.9  | 94.1   | BENE     | <a href="#">NM_005434.3</a> | MGC4419                            | transporte   | synaptic    | transport  |
| GI_36054140-S | 124.4  | 175.6  | 123.4  | EBF      | <a href="#">NM_024007.2</a> | COE1;EBF1;OLF1;O/E-1               | DNA          | nucleus     | regulation |
| GI_36054149-S | 272.3  | 334.2  | 294.6  | RIMS4    | <a href="#">NM_182970.2</a> | RIM4;C20orf190;dJ781B1.3           |              |             |            |
| GI_36054181-S | 176.6  | 224.9  | 178.4  | REG4     | <a href="#">NM_032044.2</a> | GISP;RELP;REG-IV                   | sugar        |             |            |
| GI_36054193-S | 630.3  | 669.6  | 557.6  | ZNF384   | <a href="#">NM_133476.2</a> | NP;CIZ;NMP4;CAGH1;TNRC1;CAGH1A     |              |             |            |
| GI_36287059-A | 156.8  | 175.2  | 161.7  | HTATIP   | <a href="#">NM_182709.1</a> | TIP;PLIP;TIP60;cPLA2;HTATIP1       | transcripti  | nucleus     | virulence  |
| GI_36287068-I | 140.4  | 153.7  | 142.6  | HTATIP   | <a href="#">NM_182710.1</a> | TIP;PLIP;TIP60;cPLA2;HTATIP1       | transcripti  | nucleus     | virulence  |
| GI_36287109-A | 118.1  | 137.2  | 121.3  | FGFR1OP  | <a href="#">NM_194429.1</a> | FOP                                |              |             | positive   |
| GI_36287116-S | 366.2  | 451    | 477.5  | MAN1     | <a href="#">NM_014319.3</a> |                                    | nucleic      | integral to |            |
| GI_36287129-S | 219.3  | 232.3  | 218.9  | MRPS25   | <a href="#">NM_022497.3</a> | RPMS25;MRP-                        | structural   | mitochond   | protein    |
| GI_36413606-S | 99.2   | 99.5   | 101.4  | ABCB5    | <a href="#">NM_178559.3</a> |                                    | nucleotide   | membran     | transport  |
| GI_36949365-S | 143.9  | 154.6  | 146.7  | MSH4     | <a href="#">NM_002440.2</a> |                                    | DNA          | nucleus     | meiotic    |
| GI_36950990-S | 246.1  | 238.5  | 206.2  | NR2C2    | <a href="#">NM_003298.2</a> | TR4;TAK1;TR2R1;hTAK1               | steroid      | nucleus     | regulation |
| GI_36951011-S | 1336.4 | 1577   | 1282.1 | GPR1     | <a href="#">NM_005279.2</a> |                                    | G-protein    | integral to | G-protein  |
| GI_36951033-S | 126.5  | 148.8  | 133.6  | GPR78    | <a href="#">NM_080819.2</a> |                                    | receptor     | integral to | G-protein  |
| GI_36951077-S | 61.1   | 70.6   | 76.5   | FUT9     | <a href="#">NM_006581.2</a> | Fuc-TIX                            | fucosyltra   | membran     | carbohydr  |
| GI_36951095-S | 489.7  | 1587   | 936    | FPR1     | <a href="#">NM_002029.3</a> | FPR;FMLP                           | N-formyl     | endosome    | activation |
| GI_36951115-S | 131.2  | 126.9  | 117.7  | ENPEP    | <a href="#">NM_001977.2</a> | APA;gp160                          | glutamyl     | integral to | cell       |
| GI_36951139-S | 504    | 555.4  | 569.8  | FKRP     | <a href="#">NM_024301.2</a> | MDC1C;LGMD2I;MGC2991;FLJ12576      |              |             |            |
| GI_36951161-S | 104.3  | 94.8   | 102    | D4S234E  | <a href="#">NM_014392.2</a> | P21;NSG1;D4S234                    |              | Golgi       |            |
| GI_36951195-S | 100.9  | 119.5  | 115.8  | CTNND2   | <a href="#">NM_001332.2</a> | GT24;NPRAP                         | structural   | kinesin     | cell       |
| GI_37039609-A | 264.9  | 236.9  | 288    | BTRC     | <a href="#">NM_003939.2</a> | FWD1;BTRCP;FBW1A;FBXW1A;MGC4643;   | ubiquitin    | endoplas    | ubiquitin- |
| GI_37039611-I | 86.5   | 99.5   | 101.1  | C9orf72  | <a href="#">NM_018325.1</a> | MGC23980                           |              |             |            |
| GI_37039614-A | 293.3  | 351.5  | 328.9  | C9orf72  | <a href="#">NM_145005.3</a> | MGC23980                           |              |             |            |
| GI_37039614-I | 178.3  | 160.2  | 198    | C9orf72  | <a href="#">NM_145005.3</a> | MGC23980                           |              |             |            |
| GI_37039615-I | 102.3  | 101.3  | 99.8   | BTRC     | <a href="#">NM_033637.2</a> | FWD1;BTRCP;FBW1A;FBXW1A;MGC4643;   | ubiquitin    | endoplas    | ubiquitin- |
| GI_37059722-S | 311.3  | 343.6  | 289    | KIAA0776 | <a href="#">NM_015323.2</a> |                                    |              |             |            |
| GI_37059723-S | 429.8  | 448.4  | 440    | C22orf18 | <a href="#">NM_024053.2</a> | Pane1;MGC861                       |              |             |            |
| GI_37059724-S | 2408.7 | 1877.9 | 2379.5 | MGC5576  | <a href="#">NM_024056.2</a> |                                    |              |             |            |
| GI_37059725-S | 1107.1 | 1090.7 | 957.6  | GRPEL1   | <a href="#">NM_025196.2</a> | HMGE;FLJ25609                      | chaperone    | mitochond   | mitochond  |
| GI_37059727-S | 1417.7 | 1836.7 | 1740.7 | MGC10540 | <a href="#">NM_032353.2</a> |                                    |              |             |            |

|               |        |        |        |            |                             |                                   |            |              |              |  |
|---------------|--------|--------|--------|------------|-----------------------------|-----------------------------------|------------|--------------|--------------|--|
| GI_37059728-S | 1267.2 | 1073.5 | 1085.7 | PHF5A      | <a href="#">NM_032758.2</a> | INI;MGC1346;SF3b14b;bK223H9.2     | molecular  |              |              |  |
| GI_37059729-S | 151.4  | 144.5  | 156.2  | STAF42     | <a href="#">NM_053053.2</a> |                                   |            |              |              |  |
| GI_37059730-S | 266.1  | 355.3  | 346.3  | SLC35C1    | <a href="#">NM_018389.3</a> | FUCT1;FLJ11320                    | sugar      | Golgi        | transport    |  |
| GI_37059733-S | 753.9  | 748.4  | 567.7  | HADHA      | <a href="#">NM_000182.3</a> | GBP;MTPA;LCHAD                    | 3-         | mitochond    | fatty acid   |  |
| GI_37059734-S | 1204.6 | 1257.1 | 950.1  | UCHL3      | <a href="#">NM_006002.3</a> |                                   | ubiquitin  | cytoplasm    | ubiquitin-   |  |
| GI_37059735-S | 941.5  | 733.3  | 845.2  | CWF19L1    | <a href="#">NM_018294.3</a> | FLJ10998                          |            |              |              |  |
| GI_37059737-S | 235.7  | 296.6  | 265.7  | LOC120379  | <a href="#">NM_138789.2</a> |                                   |            |              |              |  |
| GI_37059738-S | 255.1  | 273.3  | 253.4  | LOC123169  | <a href="#">NM_138792.2</a> |                                   |            |              |              |  |
| GI_37059739-S | 201.4  | 192.2  | 174.6  | LOC128153  | <a href="#">NM_138796.2</a> |                                   |            |              |              |  |
| GI_37059740-S | 146.6  | 169.9  | 158.3  | ORMDL2     | <a href="#">NM_014182.3</a> | HSPC160                           |            |              |              |  |
| GI_37059741-S | 606.3  | 339.9  | 260.9  | TUBE1      | <a href="#">NM_016262.3</a> | TUBE;FLJ22589;dJ142L7.2           | structural | pericentrio  | centrosom    |  |
| GI_37059742-S | 2314.3 | 1881.1 | 1130.8 | MKI67IP    | <a href="#">NM_032390.3</a> | NIFK;Nopp34                       | nucleic    |              |              |  |
| GI_37059743-S | 804.8  | 851    | 853.4  | PIP5K2C    | <a href="#">NM_024779.3</a> | FLJ22055                          | kinase     |              |              |  |
| GI_37059744-S | 330.9  | 360.7  | 354.9  | FLJ10407   | <a href="#">NM_018087.3</a> |                                   |            |              |              |  |
| GI_37059745-S | 2123.6 | 1709.3 | 2016.6 | PEX5       | <a href="#">NM_000319.3</a> | PXR1;PTS1R                        | peroxisom  | peroxisom    | protein-     |  |
| GI_37059746-S | 923.3  | 1071.2 | 1141.8 | TM9SF1     | <a href="#">NM_006405.3</a> | MP70;HMP70                        | transporte | integral to  | transport    |  |
| GI_37059747-S | 672.6  | 520.9  | 355.8  | MDS006     | <a href="#">NM_020233.3</a> |                                   |            |              |              |  |
| GI_37059748-S | 1741.9 | 1541.4 | 1620.8 | TBC1D15    | <a href="#">NM_022771.3</a> | FLJ12085;DKFZp761D0223            |            |              |              |  |
| GI_37059749-S | 582.5  | 704.3  | 662.3  | DKFZP564D1 | <a href="#">NM_032042.3</a> |                                   |            |              |              |  |
| GI_37059750-S | 148.9  | 173.9  | 147.3  | MGC33367   | <a href="#">NM_144602.2</a> |                                   |            |              |              |  |
| GI_37059751-S | 212.3  | 208.9  | 203    | THAP6      | <a href="#">NM_144721.2</a> | MGC30052                          | DNA        | kinesin      |              |  |
| GI_37059752-S | 113.1  | 112.9  | 108.4  | SUSD3      | <a href="#">NM_145006.2</a> | MGC26847                          |            |              |              |  |
| GI_37059754-S | 946.9  | 663    | 667.8  | LOC90353   | <a href="#">NM_145232.2</a> |                                   | electron   |              | electron     |  |
| GI_37059756-S | 98.7   | 95.6   | 96.6   | LOC122258  | <a href="#">NM_145248.2</a> |                                   |            |              |              |  |
| GI_37059757-S | 109.8  | 136.1  | 119.4  | LOC146853  | <a href="#">NM_145272.2</a> |                                   | DNA        | nucleus      | regulation   |  |
| GI_37059758-S | 287    | 293.5  | 272.6  | TREM4      | <a href="#">NM_145273.2</a> |                                   |            |              |              |  |
| GI_37059759-S | 795    | 583.9  | 623.8  | MGC33864   | <a href="#">NM_152522.2</a> |                                   |            |              |              |  |
| GI_37059760-S | 142.2  | 135.8  | 133.3  | MGC33190   | <a href="#">NM_152749.2</a> |                                   |            |              |              |  |
| GI_37059761-S | 1174.2 | 1666.8 | 1453.1 | MGC40107   | <a href="#">NM_152766.2</a> |                                   |            |              |              |  |
| GI_37059762-S | 189.6  | 223.7  | 214.9  | STCH       | <a href="#">NM_006948.3</a> |                                   | adenosine  | microsom     |              |  |
| GI_37059763-S | 735.5  | 632.7  | 610.4  | GPHN       | <a href="#">NM_020806.3</a> | GPH;GEPH;GPHRYN;KIAA1385          | catalytic  | cytoskelet   | Mo-          |  |
| GI_37059764-S | 3223.5 | 3140.6 | 3425.8 | UNC50      | <a href="#">NM_014044.4</a> | URP;GMH1;UNCL;hGMH1p;DKFZp564G022 |            |              |              |  |
| GI_37059766-S | 104.6  | 116.3  | 106.9  | MGC26979   | <a href="#">NM_153704.2</a> |                                   | molecular  |              |              |  |
| GI_37059767-S | 115.6  | 124.6  | 114.6  | ENPP6      | <a href="#">NM_153343.2</a> | MGC33971                          | hydrolase  |              | nucleotide   |  |
| GI_37059768-S | 91.5   | 96.5   | 85.1   | MGC27085   | <a href="#">NM_153353.2</a> |                                   |            |              |              |  |
| GI_37059769-S | 87.3   | 95.1   | 96.6   | MGC42105   | <a href="#">NM_153361.2</a> |                                   | protein-   |              | protein      |  |
| GI_37059770-S | 638.3  | 546.8  | 544.2  | RHPN2      | <a href="#">NM_033103.3</a> | p76RBE                            | protein    | intracellula | intracellula |  |
| GI_37059771-S | 108.7  | 112.3  | 97.2   | MGC33408   | <a href="#">NM_032517.3</a> | ba534G20.1                        | lysozyme   | extracellul  | cell wall    |  |
| GI_37059775-S | 650.1  | 745.5  | 536    | LOC196463  | <a href="#">NM_173542.2</a> |                                   |            |              |              |  |
| GI_37059776-S | 405.8  | 347.8  | 398.7  | DDX51      | <a href="#">NM_175066.2</a> | MGC42193                          | nucleic    | nucleus      | regulation   |  |
| GI_37059777-S | 100.9  | 111.6  | 112.2  | SECP43     | <a href="#">NM_017846.3</a> | PRO1902;FLJ20503                  |            |              |              |  |
| GI_37059778-S | 298.8  | 255.7  | 266    | FLJ20035   | <a href="#">NM_017631.3</a> | FLJ10787                          | ATP        |              |              |  |
| GI_37059779-S | 461.9  | 541.1  | 485.9  | FIBCD1     | <a href="#">NM_032843.3</a> | FLJ14810                          |            |              |              |  |
| GI_37059780-S | 113.9  | 116.4  | 99     | ZNF183L1   | <a href="#">NM_178861.3</a> | MGC26599;ba10G5.1                 | nucleic    |              |              |  |



|               |        |        |        |            |                             |                                  |             |             |             |
|---------------|--------|--------|--------|------------|-----------------------------|----------------------------------|-------------|-------------|-------------|
| GI_37059781-S | 1288.9 | 1295.7 | 1157.1 | MPV17      | <a href="#">NM_002437.3</a> |                                  | molecular   | integral to | oxygen      |
| GI_37059782-S | 134.2  | 146.3  | 128.4  | KIAA0980   | <a href="#">NM_025176.3</a> | FLJ11792                         | calcium     |             |             |
| GI_37059783-S | 104.5  | 121.3  | 121.7  | PNLIPRP2   | <a href="#">NM_005396.3</a> | PLRP2                            | triacylglyc | extracellul | triacylglyc |
| GI_37059784-S | 314.3  | 409.6  | 304.7  | HRB2       | <a href="#">NM_007043.5</a> | RIP-1                            |             |             |             |
| GI_37059785-S | 228.6  | 225.5  | 221    | LRRN3      | <a href="#">NM_018334.3</a> | NLRR3;NLRR-3;FLJ11129            |             |             |             |
| GI_37059786-S | 1663.1 | 1553.6 | 638.9  | HCLS1      | <a href="#">NM_005335.3</a> | HS1                              | DNA         | DNA-        | regulation  |
| GI_37059790-S | 464.6  | 549.3  | 632.3  | FLJ10055   | <a href="#">NM_017983.3</a> |                                  |             |             |             |
| GI_37059791-S | 100.2  | 95     | 97.7   | CCDC7      | <a href="#">NM_145023.3</a> | FLJ32762                         |             |             |             |
| GI_37059793-S | 167.3  | 173.3  | 157.1  | C6orf81    | <a href="#">NM_145028.3</a> | FLJ25390                         |             |             |             |
| GI_37059794-S | 111    | 111.1  | 98.7   | FLJ25351   | <a href="#">NM_152525.3</a> |                                  |             |             |             |
| GI_37059795-S | 152.3  | 156.2  | 170    | MGC26963   | <a href="#">NM_152621.3</a> |                                  |             |             |             |
| GI_37059796-S | 634    | 708.6  | 361.7  | FLJ38101   | <a href="#">NM_153261.3</a> |                                  |             |             |             |
| GI_37059797-S | 3632.8 | 3399.6 | 3337.5 | THG-1      | <a href="#">NM_030935.3</a> |                                  | transcripti | nucleus     | regulation  |
| GI_37059798-S | 93.6   | 92.3   | 93.2   | DKFZp761N1 | <a href="#">NM_181644.2</a> |                                  |             |             |             |
| GI_37059801-S | 207.6  | 227.1  | 252.7  | MGC41816   | <a href="#">NM_016466.4</a> |                                  |             |             |             |
| GI_37059809-S | 120.2  | 143.7  | 126.9  | LOC285498  | <a href="#">NM_194439.1</a> |                                  |             |             |             |
| GI_37059813-S | 130.7  | 147.1  | 140.7  | ETAA16     | <a href="#">NM_019002.2</a> |                                  |             |             |             |
| GI_37187859-A | 96.6   | 101.9  | 100.2  | CCR6       | <a href="#">NM_004367.3</a> | BN-1;CKR6;DCR2;CKRL3;DRY-        | chemokine   | integral to | cytosolic   |
| GI_37188164-I | 90.6   | 83.6   | 78     | CCR6       | <a href="#">NM_031409.2</a> | BN-1;CKR6;DCR2;CKRL3;DRY-        | chemokine   | integral to | cytosolic   |
| GI_37202113-S | 155.1  | 194.5  | 170.6  | PAPOLB     | <a href="#">NM_020144.3</a> | PAPT;TPAP                        | RNA         | nucleus     | transcripti |
| GI_37202115-S | 299.5  | 331.6  | 276.1  | FLJ32110   | <a href="#">NM_181646.2</a> |                                  |             |             |             |
| GI_37202122-S | 389.8  | 374    | 318.1  | NARG2      | <a href="#">NM_024611.2</a> | FLJ11896                         |             |             |             |
| GI_37221174-S | 661.5  | 786.6  | 791.3  | PLEKHE1    | <a href="#">NM_194449.1</a> | SCOP;KIAA0606                    | catalytic   |             |             |
| GI_37221176-S | 284.9  | 387.5  | 292.3  | NUDT11     | <a href="#">NM_018159.2</a> | DIPP3b;FLJ10628;hDIPP3beta       |             |             |             |
| GI_37221178-S | 740.1  | 562.8  | 852.2  | ANKRD25    | <a href="#">NM_015493.3</a> | FLJ20004;KIAA1518;DKFZp434N161   |             |             |             |
| GI_37221179-S | 225.1  | 239.4  | 217.9  | KIAA0478   | <a href="#">NM_014870.2</a> |                                  | DNA         | nucleus     | regulation  |
| GI_37221186-A | 101.9  | 113.4  | 97.1   | CCM1       | <a href="#">NM_194454.1</a> | CAM;KRIT1                        | small       | cytoskelet  | small       |
| GI_37221188-A | 108.8  | 109.7  | 103.1  | BTN3A1     | <a href="#">NM_194441.1</a> | BTF5;BT3.1                       |             |             | lipid       |
| GI_37221188-I | 102.6  | 102.6  | 110.4  | BTN3A1     | <a href="#">NM_194441.1</a> | BTF5;BT3.1                       |             |             | lipid       |
| GI_37537515-S | 106.3  | 115.7  | 106.4  | ZNF138     | <a href="#">NM_006524.1</a> | pHZ-32                           | transcripti | nucleus     | developm    |
| GI_37537523-S | 1415.8 | 1081   | 1558.1 | CLDN12     | <a href="#">NM_012129.2</a> |                                  | structural  | tight       |             |
| GI_37537547-S | 1446.5 | 1843   | 1929.9 | HSPC268    | <a href="#">NM_197964.1</a> |                                  |             |             |             |
| GI_37537551-S | 94.1   | 112.2  | 94.8   | SOAT       | <a href="#">NM_197965.1</a> |                                  |             |             |             |
| GI_37537553-S | 155.1  | 164.7  | 138.2  | FLJ37538   | <a href="#">NM_173564.2</a> |                                  |             |             |             |
| GI_37537557-S | 252.3  | 235.8  | 231.4  | C9orf90    | <a href="#">NM_197956.1</a> | bA379C10.2;DKFZp762G199          |             |             |             |
| GI_37537682-I | 79.3   | 89.3   | 87.5   | ZNF92      | <a href="#">NM_152626.2</a> | TF12;HPF12;FLJ34299              | zinc ion    | nucleus     | regulation  |
| GI_37537683-A | 108.9  | 112.4  | 107.2  | ZNF92      | <a href="#">NM_007139.2</a> | TF12;HPF12;FLJ34299              | zinc ion    | nucleus     | regulation  |
| GI_37537685-S | 743.9  | 641.1  | 485.7  | ZNF38      | <a href="#">NM_145914.2</a> | Zipr1;NY-REN-21;DKFZp434L134     | DNA         | nucleus     | regulation  |
| GI_37537686-S | 1617.3 | 1625.9 | 1686.4 | ZNF444     | <a href="#">NM_018337.2</a> | EZF2;EZF-2;FLJ11137              | transcripti | nucleus     | regulation  |
| GI_37537688-S | 199.6  | 146.1  | 178.6  | ZNF354A    | <a href="#">NM_005649.2</a> | EZNF;HKL1;KID1;KID-1;TCF17       | RNA         | nucleus     | hearing     |
| GI_37537690-S | 248.2  | 225.8  | 200.7  | SPPL3      | <a href="#">NM_139015.3</a> | IMP2;PSL4;DKFZP586C1324          | peptidase   | integral to |             |
| GI_37537693-S | 411.8  | 409.5  | 388.5  | MTMR6      | <a href="#">NM_004685.2</a> |                                  | protein     | cellular_co | protein     |
| GI_37537695-S | 154.4  | 180.3  | 156.2  | MPHOSPH9   | <a href="#">NM_022782.2</a> | MPP9;MPP-9;FLJ12954;DKFZp434J034 | cell cycle  | Golgi       | M phase     |
| GI_37537697-S | 2973.6 | 1755.8 | 1348.2 | MGC27005   | <a href="#">NM_152582.3</a> |                                  |             |             |             |

|               |        |        |        |           |                             |                                 |                     |                        |
|---------------|--------|--------|--------|-----------|-----------------------------|---------------------------------|---------------------|------------------------|
| GI_37537698-S | 385.1  | 253.7  | 389.1  | LOC147965 | <a href="#">NM_174905.2</a> |                                 |                     |                        |
| GI_37537700-S | 760.5  | 857    | 380.4  | KIAA0685  | <a href="#">NM_014678.2</a> | dJ579N16.1                      |                     |                        |
| GI_37537702-I | 407.8  | 436.2  | 339.3  | GLRX2     | <a href="#">NM_016066.3</a> | GRX2                            |                     |                        |
| GI_37537703-A | 384    | 330.5  | 361.2  | GLRX2     | <a href="#">NM_197962.1</a> | GRX2                            |                     |                        |
| GI_37537703-I | 183.1  | 173.1  | 181.5  | GLRX2     | <a href="#">NM_197962.1</a> | GRX2                            |                     |                        |
| GI_37537705-A | 1057.7 | 668.7  | 1081.4 | FLJ11196  | <a href="#">NM_197958.1</a> |                                 | RNA                 | nucleus regulation     |
| GI_37537705-I | 4743.8 | 3424.3 | 5225   | FLJ11196  | <a href="#">NM_197958.1</a> |                                 | RNA                 | nucleus regulation     |
| GI_37537707-S | 127.4  | 134.4  | 129    | FLJ14640  | <a href="#">NM_032816.2</a> |                                 |                     |                        |
| GI_37537709-I | 2573.7 | 1300.3 | 1037.5 | FLJ11196  | <a href="#">NM_018357.2</a> |                                 | RNA                 | nucleus regulation     |
| GI_37537711-S | 107.5  | 114.7  | 97.2   | EPB41L4A  | <a href="#">NM_022140.2</a> | NBL4;EPB41L4                    | structural          | cytoskelet biological_ |
| GI_37537713-S | 2449.3 | 2463.2 | 1748.3 | ENTH      | <a href="#">NM_014666.2</a> | EPN4;EPNR;Clint;EPSINR;KIAA0171 |                     |                        |
| GI_37537714-I | 1042.6 | 935.4  | 758.7  | EIF5      | <a href="#">NM_001969.3</a> | EIF-5A                          | GTPase              | cytosol regulation     |
| GI_37537715-A | 214    | 197.1  | 190.7  | EIF5      | <a href="#">NM_183004.3</a> | EIF-5A                          | GTPase              | cytosol regulation     |
| GI_37537715-I | 82.9   | 86.7   | 80.1   | EIF5      | <a href="#">NM_183004.3</a> | EIF-5A                          | GTPase              | cytosol regulation     |
| GI_37537717-S | 285.4  | 292.8  | 315.1  | DCPS      | <a href="#">NM_014026.3</a> | HSL1;HINT-5;HSPC015             | heat                |                        |
| GI_37537718-S | 383.3  | 336.5  | 451.8  | DCP2      | <a href="#">NM_152624.3</a> | FLJ33245                        |                     |                        |
| GI_37537719-S | 2242.3 | 3163.2 | 1463.4 | CHSY1     | <a href="#">NM_014918.3</a> | KIAA0990                        |                     |                        |
| GI_37537720-S | 1153.4 | 1617.9 | 1450.7 | B3GALT6   | <a href="#">NM_080605.2</a> | beta3GalT6                      | galactosylt membran | protein                |
| GI_37537721-S | 137.3  | 168.7  | 156.8  | AGMAT     | <a href="#">NM_024758.3</a> | FLJ23384                        | arginase            | mitochond arginine     |
| GI_37538133-S | 99.6   | 95.7   | 96.1   | LOC340223 | <a href="#">XM_290385.2</a> |                                 |                     |                        |
| GI_37538135-S | 90.1   | 98.1   | 82.9   | LOC375574 | <a href="#">XM_353423.1</a> |                                 |                     |                        |
| GI_37538137-S | 95.5   | 107.3  | 107.2  | LOC375575 | <a href="#">XM_351709.1</a> |                                 |                     |                        |
| GI_37538141-S | 90.9   | 94.3   | 83.1   | LOC377506 | <a href="#">XM_352648.1</a> |                                 |                     |                        |
| GI_37538155-S | 83.7   | 81.9   | 83.4   | LOC340228 | <a href="#">XM_291204.2</a> |                                 |                     |                        |
| GI_37538165-S | 101.3  | 108.1  | 104.1  | LOC346288 | <a href="#">XM_294165.2</a> |                                 |                     |                        |
| GI_37538171-S | 113.5  | 118.8  | 121.2  | LOC375572 | <a href="#">XM_351708.1</a> |                                 |                     |                        |
| GI_37538173-S | 87.8   | 89.7   | 84.9   | LOC254027 | <a href="#">XM_171150.2</a> |                                 |                     |                        |
| GI_37538174-S | 78.4   | 81.8   | 77.2   | LOC375573 | <a href="#">XM_353422.1</a> |                                 |                     |                        |
| GI_37538197-S | 1246.3 | 1105.5 | 1293   | KIAA1228  | <a href="#">XM_036408.5</a> |                                 |                     |                        |
| GI_37538207-S | 84.3   | 95.2   | 80.4   | LOC375576 | <a href="#">XM_353424.1</a> |                                 |                     |                        |
| GI_37538215-S | 210.2  | 274.7  | 241.9  | LOC375579 | <a href="#">XM_351710.1</a> |                                 |                     |                        |
| GI_37538224-S | 133.2  | 132.5  | 132    | LOC375582 | <a href="#">XM_351713.1</a> |                                 |                     |                        |
| GI_37538226-S | 110.5  | 112.9  | 109.5  | LOC375583 | <a href="#">XM_353426.1</a> |                                 |                     |                        |
| GI_37538244-S | 123    | 141    | 140.8  | LOC377511 | <a href="#">XM_352650.1</a> |                                 |                     |                        |
| GI_37538248-S | 93     | 112.4  | 105.8  | LOC136132 | <a href="#">XM_069728.4</a> |                                 |                     |                        |
| GI_37538256-S | 110.2  | 108.9  | 106.7  | LOC377514 | <a href="#">XM_352651.1</a> |                                 |                     |                        |
| GI_37538268-S | 166.6  | 192.8  | 181.5  | LOC375636 | <a href="#">XM_351763.1</a> |                                 |                     |                        |
| GI_37538329-S | 110.4  | 183.7  | 125.7  | LOC375546 | <a href="#">XM_353416.1</a> |                                 |                     |                        |
| GI_37538331-S | 366.2  | 356.4  | 329.2  | KIAA0415  | <a href="#">XM_166527.4</a> |                                 |                     |                        |
| GI_37538337-S | 90.3   | 99.2   | 98.3   | LOC375548 | <a href="#">XM_353417.1</a> |                                 |                     |                        |
| GI_37538343-S | 98.3   | 95.1   | 90     | LOC375549 | <a href="#">XM_351685.1</a> |                                 |                     |                        |
| GI_37538348-S | 2085   | 2239.4 | 1477.1 | LOC155340 | <a href="#">XM_055725.3</a> |                                 |                     |                        |
| GI_37538350-S | 122.6  | 129.3  | 118.6  | LOC285929 | <a href="#">XM_209824.2</a> |                                 |                     |                        |
| GI_37538362-S | 91.3   | 85.3   | 86.1   | LOC221813 | <a href="#">XM_168223.2</a> |                                 |                     |                        |

|               |       |       |       |           |                             |
|---------------|-------|-------|-------|-----------|-----------------------------|
| GI_37538364-S | 88.1  | 93.3  | 94.9  | LOC375553 | <a href="#">XM 351689.1</a> |
| GI_37538368-S | 91    | 100.7 | 97.4  | LOC375555 | <a href="#">XM 353419.1</a> |
| GI_37538378-S | 123.1 | 153.3 | 139   | LOC375557 | <a href="#">XM 353420.1</a> |
| GI_37538380-S | 327   | 390.1 | 348.2 | LOC256227 | <a href="#">XM 171163.3</a> |
| GI_37538391-S | 957.4 | 668.4 | 737.8 | LOC375558 | <a href="#">XM 351694.1</a> |
| GI_37538393-S | 555.8 | 468   | 419.8 | LOC222136 | <a href="#">XM 166563.2</a> |
| GI_37538397-S | 139.8 | 136.8 | 138.7 | LOC375559 | <a href="#">XM 351695.1</a> |
| GI_37538413-S | 98.8  | 105.8 | 98.2  | MYO1G     | <a href="#">XM 291223.2</a> |
| GI_37538415-S | 115.4 | 126.5 | 100.4 | KIAA0363  | <a href="#">XM 166571.2</a> |
| GI_37538417-S | 103.4 | 108.8 | 99.7  | LOC375565 | <a href="#">XM 351702.1</a> |
| GI_37538419-S | 153.6 | 200.1 | 157.3 | LOC340290 | <a href="#">XM 291214.2</a> |
| GI_37538421-S | 98.6  | 92.2  | 78.9  | LOC346355 | <a href="#">XM 294219.2</a> |
| GI_37538423-S | 110   | 126.4 | 111.7 | LOC377461 | <a href="#">XM 352635.1</a> |
| GI_37538427-S | 111.2 | 126.5 | 102.8 | LOC377464 | <a href="#">XM 352636.1</a> |
| GI_37538429-S | 129   | 128   | 135.5 | LOC377465 | <a href="#">XM 352637.1</a> |
| GI_37538431-S | 102.7 | 127   | 108.1 | LOC377466 | <a href="#">XM 352638.1</a> |
| GI_37538433-S | 103.6 | 98.3  | 89.9  | LOC377467 | <a href="#">XM 352640.1</a> |
| GI_37538435-S | 206.7 | 255.2 | 232.7 | LOC340265 | <a href="#">XM 294249.3</a> |
| GI_37538454-S | 359.5 | 450.1 | 237.2 | LOC221875 | <a href="#">XM 167254.3</a> |
| GI_37538458-S | 88    | 82.8  | 91.9  | LOC377480 | <a href="#">XM 352642.1</a> |
| GI_37538496-S | 90.3  | 91.9  | 78.5  | KIAA1718  | <a href="#">XM 034823.6</a> |
| GI_37538498-S | 112.6 | 113.4 | 106.1 | LOC375626 | <a href="#">XM 351751.1</a> |
| GI_37538504-S | 121.5 | 128.4 | 118.9 | LOC375632 | <a href="#">XM 351759.1</a> |
| GI_37538517-S | 146.8 | 149.8 | 143.5 | LOC155046 | <a href="#">XM 088143.3</a> |
| GI_37538519-S | 116.9 | 131.1 | 127.9 | LOC346545 | <a href="#">XM 294261.2</a> |
| GI_37538523-S | 227.3 | 267.5 | 246   | LOC375634 | <a href="#">XM 353439.1</a> |
| GI_37538527-S | 121.9 | 110.6 | 112   | LOC377560 | <a href="#">XM 352679.1</a> |
| GI_37538529-S | 84.4  | 85.6  | 74.8  | LOC130075 | <a href="#">XM 065555.3</a> |
| GI_37538531-S | 173.6 | 207.7 | 173.8 | LOC135924 | <a href="#">XM 069609.4</a> |
| GI_37538535-S | 87.8  | 87.4  | 88    | LOC135946 | <a href="#">XM 069621.7</a> |
| GI_37538540-S | 72.5  | 91.9  | 82.3  | LOC346525 | <a href="#">XM 294316.3</a> |
| GI_37538544-S | 153.2 | 179   | 157.4 | LOC135941 | <a href="#">XM 069616.4</a> |
| GI_37538548-S | 114   | 125   | 103.1 | LOC202861 | <a href="#">XM 116654.3</a> |
| GI_37538555-S | 82.2  | 93.7  | 83.7  | LOC340312 | <a href="#">XM 294319.2</a> |
| GI_37538557-S | 113.5 | 108.4 | 108.7 | LOC377585 | <a href="#">XM 352694.1</a> |
| GI_37538559-S | 101   | 90.6  | 85.9  | LOC377586 | <a href="#">XM 352695.1</a> |
| GI_37538563-S | 100.4 | 105.8 | 107.6 | LOC377590 | <a href="#">XM 352697.1</a> |
| GI_37538567-S | 100.9 | 105.1 | 97.4  | LOC377592 | <a href="#">XM 352699.1</a> |
| GI_37538601-S | 100.3 | 106.2 | 102.4 | LOC375594 | <a href="#">XM 353428.1</a> |
| GI_37538603-S | 121   | 137.4 | 121.7 | LOC202802 | <a href="#">XM 114560.2</a> |
| GI_37538617-S | 89.1  | 85.6  | 75.9  | LOC375598 | <a href="#">XM 353430.1</a> |
| GI_37538619-S | 84.4  | 87.3  | 88.9  | LOC375599 | <a href="#">XM 353431.1</a> |
| GI_37538625-S | 188.9 | 189.7 | 201.7 | LOC375602 | <a href="#">XM 351729.1</a> |
| GI_37538629-S | 357.6 | 491.3 | 497.6 | LOC255374 | <a href="#">XM 171171.2</a> |

|               |        |        |        |            |                             |
|---------------|--------|--------|--------|------------|-----------------------------|
| GI_37538632-S | 222.9  | 281.7  | 264.6  | LOC375606  | <a href="#">XM 351733.1</a> |
| GI_37538636-S | 505.6  | 597.1  | 542    | MUC3B      | <a href="#">XM 168578.3</a> |
| GI_37538638-S | 96.7   | 115.5  | 95.5   | LOC219612  | <a href="#">XM 168585.3</a> |
| GI_37538640-S | 141.9  | 175.5  | 147    | MUC17      | <a href="#">XM 168583.3</a> |
| GI_37538648-S | 93.3   | 95.4   | 85.4   | LOC222236  | <a href="#">XM 168636.3</a> |
| GI_37538652-S | 107.4  | 119.2  | 121.7  | ZRF1       | <a href="#">XM 168590.4</a> |
| GI_37538654-S | 101.3  | 99.8   | 91.8   | LOC375611  | <a href="#">XM 351742.1</a> |
| GI_37538660-S | 738.5  | 880.1  | 792.9  | IPLA2(GAMM | <a href="#">XM 291241.3</a> |
| GI_37538664-S | 127    | 134.9  | 117.4  | LOC375613  | <a href="#">XM 351744.1</a> |
| GI_37538667-S | 84.8   | 88.3   | 93.1   | LOC375614  | <a href="#">XM 353433.1</a> |
| GI_37538671-S | 105    | 112.7  | 112.1  | LOC375615  | <a href="#">XM 353434.1</a> |
| GI_37538683-S | 166.2  | 189.2  | 162.8  | LOC375618  | <a href="#">XM 353435.1</a> |
| GI_37538687-S | 127.2  | 257.1  | 160.7  | LOC375620  | <a href="#">XM 351747.1</a> |
| GI_37538693-S | 96.5   | 111.2  | 95.7   | LOC375622  | <a href="#">XM 353436.1</a> |
| GI_37538697-S | 88.2   | 89.7   | 91.6   | LOC375624  | <a href="#">XM 353438.1</a> |
| GI_37538711-S | 100.4  | 93.3   | 93.5   | LOC377522  | <a href="#">XM 352658.1</a> |
| GI_37538713-S | 101.3  | 115    | 132.8  | LOC377523  | <a href="#">XM 352659.1</a> |
| GI_37538715-S | 477.6  | 977.3  | 801.8  | LOC377524  | <a href="#">XM 352660.1</a> |
| GI_37538719-S | 355.6  | 428.1  | 354.1  | LOC377527  | <a href="#">XM 352661.1</a> |
| GI_37538723-S | 89.7   | 90.6   | 81.6   | LOC377530  | <a href="#">XM 352662.1</a> |
| GI_37538725-S | 84.4   | 87.2   | 74.5   | LOC346588  | <a href="#">XM 294328.2</a> |
| GI_37538731-S | 108    | 123.1  | 102.2  | LOC377535  | <a href="#">XM 294331.3</a> |
| GI_37538739-S | 117.8  | 126.7  | 126.8  | LOC377542  | <a href="#">XM 352668.1</a> |
| GI_37538741-S | 111.6  | 152.5  | 133    | LOC285997  | <a href="#">XM 209865.2</a> |
| GI_37538743-S | 243.5  | 295.9  | 290.7  | LOC377544  | <a href="#">XM 352669.1</a> |
| GI_37538745-S | 102.8  | 111.8  | 100.4  | LOC377545  | <a href="#">XM 352670.1</a> |
| GI_37538749-S | 112.7  | 126.8  | 120.2  | LOC377549  | <a href="#">XM 352672.1</a> |
| GI_37538751-S | 7359.8 | 6274.7 | 5138.9 | LOC136143  | <a href="#">XM 069734.2</a> |
| GI_37538753-S | 83.9   | 71.4   | 83.7   | LOC377550  | <a href="#">XM 352673.1</a> |
| GI_37538769-S | 86.7   | 87.2   | 85.7   | LOC377554  | <a href="#">XM 352676.1</a> |
| GI_37538775-S | 130    | 129.4  | 131.7  | LOC377556  | <a href="#">XM 352677.1</a> |
| GI_37538777-S | 164.8  | 154.2  | 151.6  | LOC377557  | <a href="#">XM 352678.1</a> |
| GI_37538781-S | 99.7   | 97.8   | 91.7   | LOC202789  | <a href="#">XM 116623.2</a> |
| GI_37538802-S | 127.3  | 134.3  | 119    | LOC378031  | <a href="#">XM 353546.1</a> |
| GI_37538824-S | 76.7   | 89.9   | 65.9   | LOC340267  | <a href="#">XM 295195.2</a> |
| GI_37538858-S | 106.9  | 116.6  | 110.7  | LOC378054  | <a href="#">XM 353836.1</a> |
| GI_37538916-S | 130.9  | 155.4  | 142.3  | LOC378075  | <a href="#">XM 353595.1</a> |
| GI_37538936-S | 217.1  | 257.7  | 221.2  | LOC340260  | <a href="#">XM 294209.3</a> |
| GI_37538942-S | 100.3  | 108.5  | 97.5   | LOC378217  | <a href="#">XM 353718.1</a> |
| GI_37538976-S | 82.4   | 91.4   | 85.9   | LOC378261  | <a href="#">XM 353734.1</a> |
| GI_37538993-S | 116.7  | 123.3  | 134    | LOC378089  | <a href="#">XM 353602.1</a> |
| GI_37539011-S | 255.8  | 182.4  | 197.4  | LOC378103  | <a href="#">XM 353843.1</a> |
| GI_37539091-S | 105.5  | 99.1   | 100.8  | LOC378135  | <a href="#">XM 353637.1</a> |
| GI_37539093-S | 175.6  | 217.6  | 192.1  | LOC378136  | <a href="#">XM 353638.1</a> |

|               |        |        |        |            |                             |               |           |
|---------------|--------|--------|--------|------------|-----------------------------|---------------|-----------|
| GI_37539105-S | 486.4  | 732.8  | 628.5  | LOC378140  | <a href="#">XM 353642.1</a> |               |           |
| GI_37539119-S | 97.4   | 104    | 93.5   | LOC378147  | <a href="#">XM 353648.1</a> |               |           |
| GI_37539139-S | 105.1  | 94.9   | 92.3   | LOC378311  | <a href="#">XM 353752.1</a> |               |           |
| GI_37539180-S | 487.2  | 545.7  | 399.7  | LOC378157  | <a href="#">XM 353658.1</a> |               |           |
| GI_37539232-S | 6966.7 | 6031   | 4638.1 | LOC154995  | <a href="#">XM 088103.3</a> |               |           |
| GI_37539292-S | 161.6  | 189.6  | 159.1  | LOC378201  | <a href="#">XM 353702.1</a> |               |           |
| GI_37539300-S | 294.5  | 309.8  | 379.2  | LOC378204  | <a href="#">XM 353706.1</a> |               |           |
| GI_37539398-S | 121.2  | 138.7  | 120.2  | LOC378396  | <a href="#">XM 353806.1</a> |               |           |
| GI_37539408-S | 99     | 113.5  | 113    | LOC346528  | <a href="#">XM 294318.2</a> |               |           |
| GI_37539440-S | 87     | 96.2   | 90.5   | LOC378421  | <a href="#">XM 353822.1</a> |               |           |
| GI_37539442-S | 102.4  | 103.3  | 107.3  | LOC378422  | <a href="#">XM 353869.1</a> |               |           |
| GI_37539457-S | 135.1  | 152.4  | 133.8  | LOC375186  | <a href="#">XM 351420.1</a> |               |           |
| GI_37539459-S | 170.9  | 145.3  | 150    | LOC130502  | <a href="#">XM 059438.4</a> |               |           |
| GI_37539462-S | 94.1   | 102    | 77.1   | LOC376869  | <a href="#">XM 352439.1</a> |               |           |
| GI_37539464-S | 110.9  | 106.3  | 93.1   | LOC343930  | <a href="#">XM 292850.2</a> |               |           |
| GI_37539470-S | 258.4  | 307.2  | 274.3  | LOC375396  | <a href="#">XM 353347.1</a> |               |           |
| GI_37539472-S | 90.3   | 99     | 91.7   | KIAA1239   | <a href="#">XM 049078.3</a> |               |           |
| GI_37539476-S | 165.5  | 136.2  | 135.8  | MGC19531   | <a href="#">XM 352931.1</a> | DKFZp434P1514 | catalytic |
| GI_37539480-S | 114.6  | 125.4  | 118.7  | LOC375002  | <a href="#">XM 351278.1</a> |               |           |
| GI_37539485-S | 103.5  | 109.5  | 97.8   | LOC343263  | <a href="#">XM 291485.2</a> |               |           |
| GI_37539487-S | 122.4  | 159.6  | 126.2  | LOC375004  | <a href="#">XM 351280.1</a> |               |           |
| GI_37539489-S | 642.6  | 619.4  | 791.2  | FLJ14743   | <a href="#">XM 042708.7</a> | KIAA1761      |           |
| GI_37539490-S | 228.1  | 282.7  | 248.3  | LOC375005  | <a href="#">XM 353211.1</a> |               |           |
| GI_37539492-S | 163.5  | 191.8  | 170.1  | LOC375006  | <a href="#">XM 351281.1</a> |               |           |
| GI_37539505-S | 110.7  | 118.9  | 108.1  | LOC164153  | <a href="#">XM 089415.3</a> |               |           |
| GI_37539508-S | 370.4  | 417.9  | 392.7  | LOC376631  | <a href="#">XM 353532.1</a> |               |           |
| GI_37539523-S | 113.7  | 112.8  | 105.7  | LOC375262  | <a href="#">XM 353291.1</a> |               |           |
| GI_37539525-S | 117    | 127.5  | 101.9  | LOC375263  | <a href="#">XM 353292.1</a> |               |           |
| GI_37539533-S | 118.6  | 127.4  | 121.6  | KCNT1      | <a href="#">XM 029962.3</a> |               |           |
| GI_37539535-S | 604.6  | 502.1  | 512    | DKFZp434G2 | <a href="#">XM 351857.1</a> |               |           |
| GI_37539539-S | 3411.2 | 3139.9 | 4079.1 | LOC375768  | <a href="#">XM 353491.1</a> |               |           |
| GI_37539541-S | 125.2  | 130.5  | 131.1  | LOC138167  | <a href="#">XM 070780.4</a> |               |           |
| GI_37539543-S | 85.7   | 88.9   | 73     | LOC375266  | <a href="#">XM 353294.1</a> |               |           |
| GI_37539545-S | 95.5   | 97.7   | 96     | LOC377827  | <a href="#">XM 352807.1</a> |               |           |
| GI_37539547-S | 154.2  | 288.3  | 199    | LOC376939  | <a href="#">XM 352472.1</a> |               |           |
| GI_37539557-S | 105.5  | 94.8   | 93.5   | LOC284969  | <a href="#">XM 210387.2</a> |               |           |
| GI_37539559-S | 103    | 111.4  | 101.2  | LOC376942  | <a href="#">XM 352475.1</a> |               |           |
| GI_37539565-S | 122.2  | 133.9  | 109.1  | LOC286222  | <a href="#">XM 209955.2</a> |               |           |
| GI_37539569-S | 1093.7 | 1085.4 | 970    | FNBP2      | <a href="#">XM 059095.7</a> |               |           |
| GI_37539573-S | 105.4  | 124.8  | 116.5  | LOC91170   | <a href="#">XM 036612.8</a> |               |           |
| GI_37539575-S | 169.1  | 220    | 202.2  | LOC375050  | <a href="#">XM 351319.1</a> |               |           |
| GI_37539579-S | 225    | 239.6  | 217    | LOC375052  | <a href="#">XM 351320.1</a> |               |           |
| GI_37539581-S | 101.9  | 102.6  | 92.2   | LOC284670  | <a href="#">XM 209312.2</a> |               |           |
| GI_37539583-S | 95.7   | 89.8   | 94     | LOC200125  | <a href="#">XM 117190.2</a> |               |           |

|               |         |        |        |           |                             |       |          |                      |
|---------------|---------|--------|--------|-----------|-----------------------------|-------|----------|----------------------|
| GI_37539585-S | 123.7   | 139    | 134.2  | LOC375053 | <a href="#">XM 353226.1</a> |       |          |                      |
| GI_37539593-S | 126.9   | 125.9  | 106.9  | LOC343087 | <a href="#">XM 291400.2</a> |       |          |                      |
| GI_37539596-S | 158.2   | 185.1  | 188.3  | LOC343024 | <a href="#">XM 291378.2</a> |       |          |                      |
| GI_37539600-S | 114.8   | 142.8  | 117    | LOC376703 | <a href="#">XM 352337.1</a> |       |          |                      |
| GI_37539604-S | 119.4   | 118    | 110.5  | LOC376705 | <a href="#">XM 352338.1</a> |       |          |                      |
| GI_37539606-S | 106.2   | 106.7  | 95.8   | LOC376706 | <a href="#">XM 352339.1</a> |       |          |                      |
| GI_37539608-S | 93.8    | 89.9   | 82.5   | LOC376707 | <a href="#">XM 352340.1</a> |       |          |                      |
| GI_37539612-S | 119.8   | 143.6  | 111.8  | LOC376709 | <a href="#">XM 352342.1</a> |       |          |                      |
| GI_37539619-S | 113.2   | 134.3  | 120.8  | LOC253662 | <a href="#">XM 173063.3</a> |       |          |                      |
| GI_37539620-S | 341.5   | 412.6  | 365.2  | LOC376864 | <a href="#">XM 352436.1</a> |       |          |                      |
| GI_37539623-S | 105.2   | 127.8  | 106.5  | LOC375743 | <a href="#">XM 351834.1</a> |       |          |                      |
| GI_37539625-S | 119.2   | 115    | 108.8  | LOC138255 | <a href="#">XM 059956.3</a> |       |          |                      |
| GI_37539627-S | 93.5    | 99.2   | 88.8   | LOC138240 | <a href="#">XM 059954.3</a> |       |          |                      |
| GI_37539630-S | 97.4    | 92.4   | 123    | KIAA0367  | <a href="#">XM 041018.3</a> |       |          |                      |
| GI_37539634-S | 112.8   | 134.5  | 129    | LOC347127 | <a href="#">XM 294521.2</a> |       |          |                      |
| GI_37539638-S | 230.1   | 237.3  | 273.1  | FLJ13409  | <a href="#">XM 351837.1</a> |       |          |                      |
| GI_37539651-S | 102.7   | 112.9  | 112.2  | LOC377779 | <a href="#">XM 352786.1</a> |       |          |                      |
| GI_37539655-S | 108.9   | 108.3  | 92     | LOC138972 | <a href="#">XM 071201.6</a> |       |          |                      |
| GI_37539657-S | 93.5    | 99.9   | 86.2   | LOC138932 | <a href="#">XM 071173.2</a> |       |          |                      |
| GI_37539661-S | 101.9   | 93.6   | 93.2   | LOC377781 | <a href="#">XM 352787.1</a> |       |          |                      |
| GI_37539675-S | 107.8   | 96.9   | 105.3  | LOC377789 | <a href="#">XM 352789.1</a> |       |          |                      |
| GI_37539679-S | 256.2   | 343.7  | 296.1  | LOC377792 | <a href="#">XM 352791.1</a> |       |          |                      |
| GI_37539685-S | 93.5    | 99.3   | 88.2   | PDHA2     | <a href="#">XM 352954.1</a> | PDHAL | pyruvate | mitochond glycolysis |
| GI_37539695-S | 131.7   | 153.2  | 134.1  | KIAA1680  | <a href="#">XM 351589.1</a> |       |          |                      |
| GI_37539697-S | 81.8    | 86.8   | 88.8   | LOC375403 | <a href="#">XM 353350.1</a> |       |          |                      |
| GI_37539709-S | 169.9   | 209.4  | 189.8  | LOC285412 | <a href="#">XM 208319.2</a> |       |          |                      |
| GI_37539711-S | 21595.9 | 20870  | 19636  | LOC375406 | <a href="#">XM 351591.1</a> |       |          |                      |
| GI_37539713-S | 207.3   | 239.2  | 231    | LOC375407 | <a href="#">XM 353352.1</a> |       |          |                      |
| GI_37539715-S | 113.9   | 122.7  | 117.7  | SYNPO2    | <a href="#">XM 050219.7</a> |       |          |                      |
| GI_37539723-S | 477.7   | 554.4  | 565.1  | KIAA1223  | <a href="#">XM 048747.8</a> |       |          |                      |
| GI_37539726-S | 138.2   | 140.6  | 125.2  | LOC375410 | <a href="#">XM 351593.1</a> |       |          |                      |
| GI_37539728-S | 89.5    | 91.2   | 85.8   | LOC375251 | <a href="#">XM 087167.4</a> |       |          |                      |
| GI_37539734-S | 1950.7  | 2380.5 | 2442.1 | RW1       | <a href="#">XM 351477.1</a> |       |          |                      |
| GI_37539736-S | 105.7   | 124.6  | 108.9  | LOC343990 | <a href="#">XM 292873.2</a> |       |          |                      |
| GI_37539746-S | 94      | 102.8  | 89.8   | LOC377175 | <a href="#">XM 352555.1</a> |       |          |                      |
| GI_37539748-S | 91.8    | 85.2   | 100.6  | LOC375252 | <a href="#">XM 353288.1</a> |       |          |                      |
| GI_37539752-S | 308.8   | 314    | 323.5  | LOC375253 | <a href="#">XM 353289.1</a> |       |          |                      |
| GI_37539756-S | 180.4   | 188    | 148.9  | LOC375254 | <a href="#">XM 351478.1</a> |       |          |                      |
| GI_37539764-S | 101.1   | 93.8   | 101.2  | LOC375256 | <a href="#">XM 351479.1</a> |       |          |                      |
| GI_37539770-S | 126.9   | 157.3  | 124.7  | LOC377182 | <a href="#">XM 352557.1</a> |       |          |                      |
| GI_37539776-S | 89.9    | 93.3   | 80.6   | LOC344558 | <a href="#">XM 293090.2</a> |       |          |                      |
| GI_37539782-S | 96.4    | 102    | 99.3   | LOC132556 | <a href="#">XM 067904.6</a> |       |          |                      |
| GI_37539788-S | 130.2   | 160.8  | 138    | LOC129521 | <a href="#">XM 065278.2</a> |       |          |                      |
| GI_37539790-S | 196.1   | 234.2  | 212.9  | LOC377189 | <a href="#">XM 352558.1</a> |       |          |                      |

|               |       |        |        |            |                             |                                         |
|---------------|-------|--------|--------|------------|-----------------------------|-----------------------------------------|
| GI_37539796-S | 111.7 | 91.8   | 94.6   | LOC376926  | <a href="#">XM 352464.1</a> |                                         |
| GI_37539804-S | 101.1 | 95.3   | 98.7   | LOC376930  | <a href="#">XM 352466.1</a> |                                         |
| GI_37539814-S | 200.1 | 190.2  | 186    | KIAA1350   | <a href="#">XM 052597.6</a> |                                         |
| GI_37539816-S | 85.4  | 102.7  | 94.1   | LOC344988  | <a href="#">XM 293671.3</a> |                                         |
| GI_37539818-S | 102.2 | 113.5  | 103.4  | LOC377199  | <a href="#">XM 352560.1</a> |                                         |
| GI_37539822-S | 103.7 | 109.5  | 92.7   | LOC345013  | <a href="#">XM 293658.2</a> |                                         |
| GI_37539834-S | 967.6 | 1098.9 | 1084.3 | KIAA0310   | <a href="#">XM 088459.7</a> |                                         |
| GI_37539836-S | 127.7 | 139.6  | 147.2  | LOC375769  | <a href="#">XM 351859.1</a> |                                         |
| GI_37539842-S | 112.8 | 111.5  | 114.1  | LOC375771  | <a href="#">XM 351860.1</a> |                                         |
| GI_37539847-S | 258.3 | 307.5  | 272.4  | LOC375772  | <a href="#">XM 353493.1</a> |                                         |
| GI_37539856-S | 199.9 | 215.7  | 209.1  | LOC374943  | <a href="#">XM 353194.1</a> |                                         |
| GI_37539860-S | 221.8 | 259.7  | 240.8  | LOC343133  | <a href="#">XM 291419.2</a> |                                         |
| GI_37539862-S | 405.6 | 539.2  | 477.9  | DNB5       | <a href="#">XM 089081.5</a> |                                         |
| GI_37539864-S | 195.8 | 171.6  | 164.1  | LOC199953  | <a href="#">XM 114067.6</a> |                                         |
| GI_37539870-S | 96.7  | 130.3  | 98.3   | DKFZp434E1 | <a href="#">XM 209234.3</a> |                                         |
| GI_37539873-S | 157.4 | 202.1  | 175    | LOC343066  | <a href="#">XM 291392.2</a> |                                         |
| GI_37539880-S | 99.3  | 112.5  | 89.9   | LOC376564  | <a href="#">XM 352291.1</a> |                                         |
| GI_37539890-S | 113.9 | 126.3  | 116.2  | DKFZp434P0 | <a href="#">XM 175125.3</a> |                                         |
| GI_37539894-S | 210.4 | 268.3  | 149.1  | LOC375762  | <a href="#">XM 351854.1</a> |                                         |
| GI_37539896-S | 217   | 232.9  | 235.3  | LOC375763  | <a href="#">XM 353489.1</a> |                                         |
| GI_37539898-S | 150.1 | 165.7  | 153.8  | LOC375765  | <a href="#">XM 353490.1</a> |                                         |
| GI_37539916-S | 116   | 133.3  | 116.8  | LOC375060  | <a href="#">XM 353229.1</a> |                                         |
| GI_37539931-S | 193.3 | 247.4  | 223.3  | LOC377761  | <a href="#">XM 352780.1</a> |                                         |
| GI_37539940-S | 100.6 | 111.9  | 102    | LOC377766  | <a href="#">XM 352781.1</a> |                                         |
| GI_37539943-S | 117.5 | 112    | 106.3  | LOC375724  | <a href="#">XM 351821.1</a> |                                         |
| GI_37539949-S | 130.2 | 141    | 126.3  | LOC377769  | <a href="#">XM 352783.1</a> |                                         |
| GI_37539969-S | 117.9 | 96.7   | 97.3   | LOC375737  | <a href="#">XM 351831.1</a> |                                         |
| GI_37539984-S | 106.4 | 92.6   | 94.7   | LOC377833  | <a href="#">XM 352810.1</a> |                                         |
| GI_37539986-S | 103.8 | 98.1   | 88.9   | LOC377834  | <a href="#">XM 352811.1</a> |                                         |
| GI_37539989-S | 146   | 165.9  | 136.2  | LOC375776  | <a href="#">XM 351867.1</a> |                                         |
| GI_37539991-S | 101.3 | 117.7  | 113.4  | LOC377837  | <a href="#">XM 352813.1</a> |                                         |
| GI_37539993-S | 121.6 | 124.9  | 115.5  | LOC377838  | <a href="#">XM 352814.1</a> |                                         |
| GI_37539995-S | 108.4 | 114.5  | 100.6  | LOC377839  | <a href="#">XM 352815.1</a> |                                         |
| GI_37540000-S | 367.9 | 391.4  | 330.3  | NOXA1      | <a href="#">XM 351868.1</a> | p51NOX;FLJ25475;NY-CO-31;SDCCAG31 tumor |
| GI_37540022-S | 832.7 | 673.6  | 515.1  | LOC375731  | <a href="#">XM 351827.1</a> |                                         |
| GI_37540034-S | 126.2 | 140.2  | 121    | KIAA1214   | <a href="#">XM 291090.2</a> |                                         |
| GI_37540036-S | 111.1 | 121.2  | 124.8  | LOC148864  | <a href="#">XM 086344.4</a> |                                         |
| GI_37540037-S | 79.8  | 92     | 79.3   | LOC375413  | <a href="#">XM 353356.1</a> |                                         |
| GI_37540039-S | 107.7 | 122.4  | 110.7  | LOC374983  | <a href="#">XM 353204.1</a> |                                         |
| GI_37540041-S | 89.9  | 79.8   | 90.3   | LOC375414  | <a href="#">XM 351594.1</a> |                                         |
| GI_37540045-S | 120.9 | 115.3  | 113.4  | LOC374985  | <a href="#">XM 353205.1</a> |                                         |
| GI_37540047-S | 151.4 | 200.3  | 166.8  | LOC166752  | <a href="#">XM 094074.5</a> |                                         |
| GI_37540051-S | 129.1 | 133.2  | 128.7  | LOC375745  | <a href="#">XM 353482.1</a> |                                         |
| GI_37540053-S | 129.6 | 141.9  | 149.9  | LOC345051  | <a href="#">XM 293680.2</a> |                                         |

|               |        |        |        |           |                             |
|---------------|--------|--------|--------|-----------|-----------------------------|
| GI_37540055-S | 196.9  | 228.9  | 223    | LOC374987 | <a href="#">XM 351264.1</a> |
| GI_37540058-S | 244.7  | 293.8  | 258    | LOC375416 | <a href="#">XM 353357.1</a> |
| GI_37540060-S | 1193.3 | 713.5  | 906.4  | ELTD1     | <a href="#">XM 351265.1</a> |
| GI_37540066-S | 228.5  | 254.1  | 241.1  | LOC375417 | <a href="#">XM 351595.1</a> |
| GI_37540068-S | 349.4  | 246.3  | 186.8  | LOC148418 | <a href="#">XM 086188.7</a> |
| GI_37540070-S | 123.5  | 232.9  | 137.6  | KIAA1727  | <a href="#">XM 034262.7</a> |
| GI_37540072-S | 190.3  | 143    | 136.3  | MCOLN2    | <a href="#">XM 351266.1</a> |
| GI_37540076-S | 2109   | 2644.7 | 2306.5 | FLJ13815  | <a href="#">XM 086186.3</a> |
| GI_37540081-S | 102.5  | 104.3  | 97.8   | LOC375418 | <a href="#">XM 351596.1</a> |
| GI_37540084-S | 97.4   | 112.4  | 95.3   | LOC374989 | <a href="#">XM 353207.1</a> |
| GI_37540086-S | 143.2  | 157.8  | 135.4  | LOC375419 | <a href="#">XM 353358.1</a> |
| GI_37540092-S | 111.9  | 115.1  | 103    | LOC374990 | <a href="#">XM 351267.1</a> |
| GI_37540095-S | 117.1  | 127.9  | 133.3  | LOC343221 | <a href="#">XM 291464.2</a> |
| GI_37540111-S | 92.2   | 91.6   | 91.9   | LOC152667 | <a href="#">XM 087500.7</a> |
| GI_37540113-S | 101.5  | 108.2  | 102.6  | LOC375779 | <a href="#">XM 353494.1</a> |
| GI_37540117-S | 134.4  | 162.2  | 141.2  | LOC377211 | <a href="#">XM 352563.1</a> |
| GI_37540122-S | 112.9  | 113.8  | 107.3  | LOC377212 | <a href="#">XM 352564.1</a> |
| GI_37540128-S | 99     | 104.4  | 101.5  | LOC377218 | <a href="#">XM 352566.1</a> |
| GI_37540144-S | 119.9  | 122.3  | 104.9  | LOC375784 | <a href="#">XM 351876.1</a> |
| GI_37540243-S | 148.4  | 166    | 157    | LOC375691 | <a href="#">XM 353471.1</a> |
| GI_37540245-S | 98.2   | 106.3  | 96.7   | LOC375692 | <a href="#">XM 353472.1</a> |
| GI_37540247-S | 233.2  | 356.1  | 264    | LOC256280 | <a href="#">XM 171224.2</a> |
| GI_37540251-S | 889.5  | 1581.4 | 1768.9 | FLJ23309  | <a href="#">XM 291315.2</a> |
| GI_37540253-S | 355.3  | 422.9  | 414.4  | KIAA2026  | <a href="#">XM 088551.7</a> |
| GI_37540255-S | 248.3  | 301.2  | 376.2  | RANBP6    | <a href="#">XM 039701.4</a> |
| GI_37540257-S | 572.2  | 782.4  | 767.5  | LOC375693 | <a href="#">XM 351798.1</a> |
| GI_37540261-S | 2331.4 | 2114.6 | 1573.1 | LOC158345 | <a href="#">XM 034640.4</a> |
| GI_37540263-S | 115.1  | 114.7  | 121.3  | LOC375695 | <a href="#">XM 351800.1</a> |
| GI_37540271-S | 92     | 91.1   | 101.2  | LOC375698 | <a href="#">XM 353473.1</a> |
| GI_37540273-S | 121.1  | 131.6  | 125.1  | LOC375699 | <a href="#">XM 353474.1</a> |
| GI_37540275-S | 267.6  | 334.1  | 282.1  | LOC286319 | <a href="#">XM 210009.2</a> |
| GI_37540278-S | 84.7   | 104.5  | 111.7  | LOC375700 | <a href="#">XM 351803.1</a> |
| GI_37540284-S | 104.9  | 109.2  | 101.5  | KIAA1161  | <a href="#">XM 351807.1</a> |
| GI_37540288-S | 314.9  | 398.8  | 344.6  | KIAA1045  | <a href="#">XM 048592.3</a> |
| GI_37540290-S | 331.8  | 414.8  | 376.7  | LOC138729 | <a href="#">XM 072554.5</a> |
| GI_37540292-S | 107.5  | 97.6   | 103.5  | LOC375706 | <a href="#">XM 351809.1</a> |
| GI_37540294-S | 81     | 89.9   | 78.7   | LOC375707 | <a href="#">XM 353475.1</a> |
| GI_37540298-S | 294    | 377.9  | 326.1  | LOC375709 | <a href="#">XM 351811.1</a> |
| GI_37540300-S | 114.4  | 124.6  | 113.2  | LOC347252 | <a href="#">XM 294567.2</a> |
| GI_37540309-S | 125.8  | 161.3  | 142.9  | LOC377721 | <a href="#">XM 352765.1</a> |
| GI_37540311-S | 92.3   | 116.4  | 100.7  | LOC340479 | <a href="#">XM 294574.2</a> |
| GI_37540323-S | 197.7  | 217.3  | 206.9  | LOC340485 | <a href="#">XM 294540.2</a> |
| GI_37540341-S | 94.8   | 98.1   | 84.6   | LOC377730 | <a href="#">XM 352770.1</a> |
| GI_37540345-S | 137    | 132.3  | 146.3  | LOC138715 | <a href="#">XM 071061.4</a> |



|               |        |        |        |            |                              |                    |
|---------------|--------|--------|--------|------------|------------------------------|--------------------|
| GI_37540349-S | 146.7  | 177.9  | 153.8  | LOC377739  | <a href="#">XM 352773.1</a>  |                    |
| GI_37540351-S | 168.3  | 193.5  | 172.6  | LOC377742  | <a href="#">XM 352774.1</a>  |                    |
| GI_37540355-S | 93.9   | 83.8   | 86.9   | LOC340501  | <a href="#">XM 294568.2</a>  |                    |
| GI_37540365-S | 206.6  | 181.5  | 175.7  | LOC375399  | <a href="#">XM 353349.1</a>  |                    |
| GI_37540369-S | 130.1  | 124.6  | 132.3  | LOC377166  | <a href="#">XM 352552.1</a>  |                    |
| GI_37540377-S | 125.9  | 136.5  | 128.2  | LOC377169  | <a href="#">XM 352553.1</a>  |                    |
| GI_37540379-S | 112    | 132.2  | 101.3  | LOC345378  | <a href="#">XM 293802.2</a>  |                    |
| GI_37540384-S | 499.5  | 358.5  | 361.7  | ODZ3       | <a href="#">XM 352956.1</a>  |                    |
| GI_37540386-S | 155.6  | 139.7  | 138    | FLJ31033   | <a href="#">XM 037817.9</a>  |                    |
| GI_37540388-S | 271.5  | 295    | 273.3  | NEK1       | <a href="#">XM 291107.2</a>  | KIAA1901;NY-REN-55 |
| GI_37540390-S | 105.7  | 119.9  | 102.2  | LOC375420  | <a href="#">XM 351597.1</a>  |                    |
| GI_37540392-S | 149.6  | 151.7  | 153.2  | LOC375421  | <a href="#">XM 353359.1</a>  |                    |
| GI_37540394-S | 115.9  | 122.1  | 125.3  | LOC375422  | <a href="#">XM 353360.1</a>  |                    |
| GI_37540396-S | 1396   | 958.2  | 908.1  | KIAA1430   | <a href="#">XM 087593.7</a>  |                    |
| GI_37540398-S | 103.7  | 93.5   | 88.7   | LOC285440  | <a href="#">XM 209612.2</a>  |                    |
| GI_37540400-S | 109.5  | 122.4  | 111    | LOC375423  | <a href="#">XM 353361.1</a>  |                    |
| GI_37540402-S | 101.5  | 107    | 96.6   | LOC152663  | <a href="#">XM 087499.6</a>  |                    |
| GI_37540408-S | 85.6   | 82.1   | 83     | LOC375426  | <a href="#">XM 353363.1</a>  |                    |
| GI_37540418-S | 128.2  | 144.8  | 132.6  | LOC285433  | <a href="#">XM 210581.2</a>  |                    |
| GI_37540422-S | 145    | 193.5  | 157.2  | LOC377226  | <a href="#">XM 352568.1</a>  |                    |
| GI_37540424-S | 102.8  | 111.5  | 94.8   | LOC377227  | <a href="#">XM 352569.1</a>  |                    |
| GI_37540426-S | 100.1  | 91.1   | 100.3  | LOC377230  | <a href="#">XM 353536.1</a>  |                    |
| GI_37540428-S | 112    | 106.5  | 98.6   | LOC345156  | <a href="#">XM 293715.3</a>  |                    |
| GI_37540431-S | 498.4  | 641.9  | 683.9  | KIAA0114   | <a href="#">XM 353348.1</a>  |                    |
| GI_37540435-S | 190.7  | 139.3  | 134.7  | KIAA1211   | <a href="#">XM 044178.8</a>  |                    |
| GI_37540437-S | 131.9  | 137.8  | 118.9  | LOC339977  | <a href="#">XM 291099.2</a>  |                    |
| GI_37540447-S | 1955.1 | 1123.8 | 1306.4 | SQV7L      | <a href="#">XM 351842.1</a>  |                    |
| GI_37540449-S | 97.9   | 117.1  | 101.5  | LOC158431  | <a href="#">XM 098940.4</a>  |                    |
| GI_37540451-S | 113    | 111.2  | 100.8  | LOC347262  | <a href="#">XM 294584.2</a>  |                    |
| GI_37540452-S | 116.1  | 139.1  | 111.2  | LOC375749  | <a href="#">XM 351844.1</a>  |                    |
| GI_37540454-S | 246.3  | 300.8  | 282    | KIAA1529   | <a href="#">XM 351845.1</a>  |                    |
| GI_37540458-S | 3022.3 | 3929.9 | 2005   | TXNDC4     | <a href="#">XM 088476.6</a>  |                    |
| GI_37540462-S | 149.7  | 130.7  | 141.3  | LOC375752  | <a href="#">XM 353485.1</a>  |                    |
| GI_37540464-S | 101.3  | 95.9   | 80     | LOC138752  | <a href="#">XM 060001.5</a>  |                    |
| GI_37540466-S | 207.3  | 177.5  | 139.9  | KIAA0368   | <a href="#">XM 036708.10</a> |                    |
| GI_37540468-S | 152.3  | 133.6  | 125.6  | LOC375753  | <a href="#">XM 353486.1</a>  |                    |
| GI_37540472-S | 106.7  | 141.6  | 138.5  | LOC169834  | <a href="#">XM 095965.3</a>  |                    |
| GI_37540474-S | 205.9  | 227    | 210.3  | KIAA1952   | <a href="#">XM 054983.6</a>  |                    |
| GI_37540478-S | 115.8  | 138.2  | 126.1  | LOC375754  | <a href="#">XM 351848.1</a>  |                    |
| GI_37540487-S | 268.8  | 304.7  | 293.4  | DKFZP434C2 | <a href="#">XM 044196.5</a>  |                    |
| GI_37540489-S | 146.7  | 167.1  | 164.5  | FLJ00001   | <a href="#">XM 088525.3</a>  |                    |
| GI_37540494-S | 856.8  | 835.4  | 659.2  | LOC375757  | <a href="#">XM 351851.1</a>  |                    |
| GI_37540496-S | 4644.3 | 4316.6 | 3946.9 | LRRC8      | <a href="#">XM 026998.6</a>  | FLJ10337;KIAA1437  |
| GI_37540497-S | 172.7  | 185.9  | 150.3  | LOC375758  | <a href="#">XM 353487.1</a>  |                    |

|               |        |        |        |            |                             |                             |
|---------------|--------|--------|--------|------------|-----------------------------|-----------------------------|
| GI_37540499-S | 259.6  | 317.3  | 314.3  | LOC375759  | <a href="#">XM 351852.1</a> | FLJ35803                    |
| GI_37540509-S | 133.4  | 156.4  | 143.6  | LOC340508  | <a href="#">XM 295263.2</a> |                             |
| GI_37540515-S | 105    | 98.4   | 105.1  | LOC138804  | <a href="#">XM 071098.2</a> |                             |
| GI_37540517-S | 98.3   | 102.7  | 99.1   | LOC138803  | <a href="#">XM 071097.2</a> |                             |
| GI_37540519-S | 179.3  | 211.7  | 202.8  | LOC138802  | <a href="#">XM 071096.3</a> |                             |
| GI_37540521-S | 195.2  | 250.9  | 215.7  | LOC138799  | <a href="#">XM 071093.5</a> |                             |
| GI_37540525-S | 86.3   | 84.9   | 93.7   | LOC286362  | <a href="#">XM 210752.2</a> |                             |
| GI_37540527-S | 102    | 111.1  | 104.6  | LOC286365  | <a href="#">XM 210755.3</a> |                             |
| GI_37540533-S | 98.9   | 102.9  | 91.3   | LOC377808  | <a href="#">XM 352796.1</a> |                             |
| GI_37540537-S | 100.1  | 113.7  | 106.2  | OR2K2      | <a href="#">XM 095961.5</a> | OR2AR1P;HTPCRH06;HSHTPCRH06 |
| GI_37540539-S | 91.9   | 84.3   | 90     | LOC377811  | <a href="#">XM 352797.1</a> |                             |
| GI_37540541-S | 189.8  | 212.1  | 196.3  | KIAA1958   | <a href="#">XM 088566.6</a> |                             |
| GI_37540543-S | 98.8   | 105.8  | 105.3  | LOC377812  | <a href="#">XM 352798.1</a> |                             |
| GI_37540547-S | 90.6   | 106.7  | 87.1   | EGFL5      | <a href="#">XM 098838.3</a> |                             |
| GI_37540549-S | 226    | 251.7  | 232.5  | LOC347168  | <a href="#">XM 294531.3</a> |                             |
| GI_37540551-S | 235.9  | 294.7  | 269.3  | OR1J5      | <a href="#">XM 294533.2</a> |                             |
| GI_37540553-S | 474    | 570    | 509.1  | LOC138882  | <a href="#">XM 071151.2</a> |                             |
| GI_37540563-S | 162.6  | 178.2  | 170.2  | LOC377819  | <a href="#">XM 352801.1</a> |                             |
| GI_37540565-S | 99.1   | 111.8  | 94.8   | LOC377820  | <a href="#">XM 352802.1</a> |                             |
| GI_37540567-S | 114.7  | 135    | 125.5  | LOC377821  | <a href="#">XM 352803.1</a> |                             |
| GI_37540569-S | 139.5  | 168.9  | 144.6  | LOC286207  | <a href="#">XM 209941.3</a> |                             |
| GI_37540573-S | 276.1  | 274.5  | 255.1  | LOC377824  | <a href="#">XM 352805.1</a> |                             |
| GI_37540583-S | 215.6  | 266.8  | 244.6  | LOC132969  | <a href="#">XM 068121.2</a> |                             |
| GI_37540585-S | 114.2  | 113.4  | 106.8  | HSPX153    | <a href="#">XM 352543.1</a> |                             |
| GI_37540588-S | 7199.4 | 7221.2 | 5918.4 | LOC375391  | <a href="#">XM 353345.1</a> |                             |
| GI_37540591-S | 279.3  | 332.7  | 299    | LOC339985  | <a href="#">XM 295120.2</a> |                             |
| GI_37540593-S | 168    | 172    | 165.7  | LOC345375  | <a href="#">XM 293801.3</a> |                             |
| GI_37540595-S | 83.2   | 95.1   | 83.9   | KIAA1643   | <a href="#">XM 035371.5</a> |                             |
| GI_37540597-S | 111.7  | 119.9  | 112.9  | LOC377133  | <a href="#">XM 352544.1</a> |                             |
| GI_37540600-S | 88.3   | 89.1   | 87.6   | LOC377163  | <a href="#">XM 352551.1</a> |                             |
| GI_37540604-S | 117.6  | 152.5  | 134.3  | LOC375747  | <a href="#">XM 353483.1</a> |                             |
| GI_37540606-S | 94.4   | 95.9   | 96.2   | DKFZp43411 | <a href="#">XM 030729.4</a> |                             |
| GI_37540610-S | 142.3  | 169    | 150.5  | LOC138652  | <a href="#">XM 071013.4</a> |                             |
| GI_37540612-S | 1252.7 | 1231.6 | 1022.8 | LOC138649  | <a href="#">XM 059987.6</a> |                             |
| GI_37540617-S | 99.4   | 107.2  | 100.3  | LOC375392  | <a href="#">XM 353346.1</a> |                             |
| GI_37540621-S | 2856.7 | 2118   | 1560.8 | C4orf9     | <a href="#">XM 035572.8</a> |                             |
| GI_37540623-S | 123.8  | 143.4  | 131.3  | LOC345222  | <a href="#">XM 293745.2</a> |                             |
| GI_37540625-S | 182.6  | 205.3  | 200.1  | LOC377134  | <a href="#">XM 352545.1</a> |                             |
| GI_37540628-S | 84.8   | 98.8   | 92.5   | LOC255324  | <a href="#">XM 171078.4</a> |                             |
| GI_37540630-S | 170.4  | 471.8  | 352.6  | KIAA1102   | <a href="#">XM 044461.9</a> |                             |
| GI_37540632-S | 296.1  | 336.2  | 311.3  | LOC375397  | <a href="#">XM 351581.1</a> |                             |
| GI_37540634-S | 197.3  | 228.6  | 172.5  | KIAA1458   | <a href="#">XM 044434.9</a> |                             |
| GI_37540638-S | 126.4  | 155.8  | 133.1  | LOC256165  | <a href="#">XM 171080.2</a> |                             |
| GI_37540640-S | 267.4  | 307.9  | 273.9  | LOC285429  | <a href="#">XM 209607.4</a> |                             |

|               |        |        |                   |                             |     |         |          |
|---------------|--------|--------|-------------------|-----------------------------|-----|---------|----------|
| GI_37540654-S | 143.8  | 203.9  | 164 KIAA1729      | <a href="#">XM 114418.3</a> |     |         |          |
| GI_37540659-S | 475.9  | 439.1  | 445.7 KIAA1345    | <a href="#">XM 106386.6</a> |     |         |          |
| GI_37540661-S | 613.8  | 642.4  | 420.5 LOC285550   | <a href="#">XM 209656.2</a> |     |         |          |
| GI_37540662-S | 95.8   | 90.3   | 99.3 KIAA1276     | <a href="#">XM 039169.2</a> |     |         |          |
| GI_37540664-S | 116.1  | 120.2  | 105.2 LOC375395   | <a href="#">XM 351579.1</a> |     |         |          |
| GI_37540666-S | 463.3  | 571.2  | 511.6 GPR125      | <a href="#">XM 291111.2</a> |     |         |          |
| GI_37540670-S | 123.2  | 124    | 123.8 LOC377140   | <a href="#">XM 352547.1</a> |     |         |          |
| GI_37540672-S | 84.6   | 88.7   | 90 LOC377141      | <a href="#">XM 352548.1</a> |     |         |          |
| GI_37540680-S | 294.2  | 362.5  | 314.8 CSN1S2A     | <a href="#">XM 352957.1</a> |     |         |          |
| GI_37540682-S | 109.2  | 126.6  | 139.3 LOC375428   | <a href="#">XM 351599.1</a> |     |         |          |
| GI_37540696-S | 397.4  | 356.2  | 281.3 RBIG1       | <a href="#">XM 352895.1</a> |     |         |          |
| GI_37540698-S | 111.1  | 125.3  | 131.2 LOC374424   | <a href="#">XM 350858.1</a> |     |         |          |
| GI_37540708-S | 162.9  | 180.8  | 175.2 RAB39       | <a href="#">XM 084662.3</a> |     |         |          |
| GI_37540711-S | 110.1  | 114.2  | 109.9 KIAA1391    | <a href="#">XM 040866.4</a> |     |         |          |
| GI_37540715-S | 123.8  | 123    | 108.3 LOC120376   | <a href="#">XM 071712.9</a> |     |         |          |
| GI_37540717-S | 106.2  | 117.4  | 97.3 LOC374427    | <a href="#">XM 350862.1</a> |     |         |          |
| GI_37540721-S | 301.2  | 422.4  | 384.8 LOC374429   | <a href="#">XM 353016.1</a> |     |         |          |
| GI_37540723-S | 1144.1 | 1000.2 | 1004.9 DKFZp547C1 | <a href="#">XM 208529.4</a> |     |         |          |
| GI_37540730-S | 146    | 179.4  | 114.6 LOC374430   | <a href="#">XM 353017.1</a> |     |         |          |
| GI_37540732-S | 1401   | 454.4  | 285.2 LOC283157   | <a href="#">XM 210908.2</a> |     |         |          |
| GI_37540735-S | 384.3  | 431.3  | 380.7 LOC219854   | <a href="#">XM 166164.4</a> |     |         |          |
| GI_37540736-S | 114.3  | 138.9  | 135.1 LOC338667   | <a href="#">XM 294675.3</a> |     |         |          |
| GI_37540740-S | 88.9   | 89.8   | 72.4 LOC374435    | <a href="#">XM 353018.1</a> |     |         |          |
| GI_37540742-S | 407.6  | 378.1  | 531 KIAA0056      | <a href="#">XM 166201.3</a> | DNA | nucleus | electron |
| GI_37540747-S | 195    | 222.8  | 211.6 KIAA1735    | <a href="#">XM 290496.3</a> |     |         |          |
| GI_37540765-S | 464.2  | 589.2  | 606.7 LOC283698   | <a href="#">XM 208108.3</a> |     |         |          |
| GI_37540767-S | 102.7  | 104.3  | 96.2 LOC376069    | <a href="#">XM 352055.1</a> |     |         |          |
| GI_37540771-S | 100    | 103.2  | 103.8 LOC376072   | <a href="#">XM 352056.1</a> |     |         |          |
| GI_37540777-S | 90.9   | 101.7  | 96.9 LOC342167    | <a href="#">XM 292394.3</a> |     |         |          |
| GI_37540783-S | 354.4  | 459.1  | 370.2 LOC376074   | <a href="#">XM 352058.1</a> |     |         |          |
| GI_37540787-S | 129.1  | 157.4  | 127.9 LOC338662   | <a href="#">XM 291838.3</a> |     |         |          |
| GI_37540789-S | 159    | 190.3  | 195.7 LOC219875   | <a href="#">XM 166782.4</a> |     |         |          |
| GI_37540799-S | 90.1   | 88.7   | 90.5 LOC219869    | <a href="#">XM 166776.2</a> |     |         |          |
| GI_37540803-S | 112.3  | 117.5  | 93.6 LOC376075    | <a href="#">XM 352059.1</a> |     |         |          |
| GI_37540807-S | 255.6  | 280    | 238.1 LOC374613   | <a href="#">XM 350976.1</a> |     |         |          |
| GI_37540809-S | 109.4  | 133.3  | 123 LOC376077     | <a href="#">XM 352062.1</a> |     |         |          |
| GI_37540811-S | 150.6  | 185.2  | 173.1 LOC219865   | <a href="#">XM 166767.5</a> |     |         |          |
| GI_37540816-S | 123.7  | 108.5  | 96.2 FLJ20582     | <a href="#">XM 090970.6</a> |     |         |          |
| GI_37540818-S | 196.7  | 225.7  | 220.5 LOC376079   | <a href="#">XM 352064.1</a> |     |         |          |
| GI_37540822-S | 107    | 120.9  | 118.8 LOC374614   | <a href="#">XM 350977.1</a> |     |         |          |
| GI_37540824-S | 211.6  | 284.3  | 227.7 LOC341098   | <a href="#">XM 291857.3</a> |     |         |          |
| GI_37540826-S | 206.9  | 249.7  | 237.1 LOC146071   | <a href="#">XM 085316.7</a> |     |         |          |
| GI_37540827-S | 122.6  | 128.5  | 107.3 LOC376080   | <a href="#">XM 352065.1</a> |     |         |          |
| GI_37540832-S | 268    | 221.4  | 218.5 MGA         | <a href="#">XM 031689.7</a> |     |         |          |

|               |        |        |        |            |                             |             |     |             |
|---------------|--------|--------|--------|------------|-----------------------------|-------------|-----|-------------|
| GI_37540836-S | 104    | 101    | 99.7   | LOC374616  | <a href="#">XM_353083.1</a> |             |     |             |
| GI_37540838-S | 193.4  | 230.1  | 202.5  | LOC255189  | <a href="#">XM_172929.3</a> |             |     |             |
| GI_37540841-S | 166.7  | 163.4  | 157.8  | STARD9     | <a href="#">XM_031744.4</a> |             |     |             |
| GI_37540846-S | 133.2  | 143.9  | 128    | LOC161823  | <a href="#">XM_091156.8</a> |             |     |             |
| GI_37540852-S | 120.8  | 130    | 118.5  | LOC90525   | <a href="#">XM_032304.4</a> |             |     |             |
| GI_37540856-S | 81.7   | 97.5   | 89.3   | KIAA0912   | <a href="#">XM_034904.5</a> |             |     |             |
| GI_37540860-S | 120.9  | 135.3  | 121.3  | FLJ25756   | <a href="#">XM_350984.1</a> |             |     |             |
| GI_37540864-S | 110.2  | 124.7  | 133    | LOC145783  | <a href="#">XM_085231.7</a> |             |     |             |
| GI_37540868-S | 235.1  | 280.4  | 245.6  | LOC145780  | <a href="#">XM_096864.2</a> |             |     |             |
| GI_37540871-S | 322    | 330.4  | 315.5  | KIAA0295   | <a href="#">XM_042833.8</a> |             |     |             |
| GI_37540877-S | 638.3  | 795.1  | 673.8  | GLCE       | <a href="#">XM_290631.2</a> |             |     |             |
| GI_37540879-S | 482    | 629.5  | 555    | LOC374621  | <a href="#">XM_353085.1</a> |             |     |             |
| GI_37540881-S | 99.3   | 97.2   | 95.4   | LOC123397  | <a href="#">XM_063630.5</a> |             |     |             |
| GI_37540885-S | 109.1  | 116.1  | 100.6  | LOC196993  | <a href="#">XM_116971.5</a> |             |     |             |
| GI_37540886-S | 104.7  | 120.9  | 106.9  | LOC196994  | <a href="#">XM_116970.2</a> |             |     |             |
| GI_37540890-S | 222.2  | 264.4  | 238.5  | LOC196996  | <a href="#">XM_113796.3</a> |             |     |             |
| GI_37540892-S | 184    | 209.2  | 191.9  | LOC283677  | <a href="#">XM_208778.2</a> |             |     |             |
| GI_37540898-S | 141.5  | 140.1  | 119.5  | LOC374624  | <a href="#">XM_292358.3</a> |             |     |             |
| GI_37540911-S | 253.5  | 313.4  | 284.3  | LOC146013  | <a href="#">XM_096919.2</a> |             |     |             |
| GI_37540913-S | 163.2  | 271.8  | 185.6  | IREB2      | <a href="#">XM_039114.4</a> | IRP2;IRP2AD | RNA | cytosol RNA |
| GI_37540914-S | 161.5  | 166.1  | 157    | LOC123688  | <a href="#">XM_058719.7</a> |             |     |             |
| GI_37540915-S | 86.3   | 89.5   | 87     | LOC374628  | <a href="#">XM_353086.1</a> |             |     |             |
| GI_37540921-S | 96.1   | 118.8  | 97.1   | LOC374631  | <a href="#">XM_353087.1</a> |             |     |             |
| GI_37540926-S | 138.1  | 248.7  | 193.8  | DKFZp434J0 | <a href="#">XM_290645.2</a> |             |     |             |
| GI_37540927-S | 123.1  | 153.4  | 132.5  | LOC283726  | <a href="#">XM_208809.2</a> |             |     |             |
| GI_37540949-S | 95.8   | 97     | 89.7   | LOC374652  | <a href="#">XM_353093.1</a> |             |     |             |
| GI_37540951-S | 113    | 117.3  | 109.3  | LOC374653  | <a href="#">XM_353094.1</a> |             |     |             |
| GI_37540955-S | 121    | 123.6  | 121    | LOC254559  | <a href="#">XM_172931.4</a> |             |     |             |
| GI_37540961-S | 121.7  | 143.3  | 142.2  | MESP2      | <a href="#">XM_085261.2</a> |             |     |             |
| GI_37540967-S | 194.5  | 216.3  | 198.9  | LOC374657  | <a href="#">XM_351011.1</a> |             |     |             |
| GI_37540969-S | 140.4  | 151.4  | 123.9  | LOC374658  | <a href="#">XM_351012.1</a> |             |     |             |
| GI_37540971-S | 142.5  | 152.3  | 131.9  | LOC342132  | <a href="#">XM_292384.2</a> |             |     |             |
| GI_37540975-S | 128.8  | 146.8  | 135.4  | LOC374660  | <a href="#">XM_353095.1</a> |             |     |             |
| GI_37540979-S | 470    | 588.5  | 520.9  | LOC374662  | <a href="#">XM_353096.1</a> |             |     |             |
| GI_37540983-S | 92.3   | 88.6   | 91.1   | LOC342156  | <a href="#">XM_292389.3</a> |             |     |             |
| GI_37540986-S | 158.6  | 214.7  | 172.4  | DKFZp434P1 | <a href="#">XM_115306.5</a> |             |     |             |
| GI_37540996-S | 100.9  | 99.7   | 99.1   | LOC219537  | <a href="#">XM_166203.4</a> |             |     |             |
| GI_37540998-S | 104    | 117.2  | 106.5  | LOC374391  | <a href="#">XM_353008.1</a> |             |     |             |
| GI_37541000-S | 95.2   | 95.9   | 92.2   | LOC374392  | <a href="#">XM_350830.1</a> |             |     |             |
| GI_37541002-S | 179    | 206.9  | 189.8  | LOC374393  | <a href="#">XM_350831.1</a> |             |     |             |
| GI_37541004-S | 171.7  | 214.4  | 181.5  | LOC255649  | <a href="#">XM_172860.2</a> |             |     |             |
| GI_37541006-S | 654.1  | 945.5  | 619.1  | LOC255714  | <a href="#">XM_172861.3</a> |             |     |             |
| GI_37541012-S | 548.5  | 618.3  | 627.5  | KIAA1698   | <a href="#">XM_290519.2</a> |             |     |             |
| GI_37541013-S | 1965.9 | 1960.6 | 1629.6 | LOC374395  | <a href="#">XM_350833.1</a> |             |     |             |

|               |        |        |        |           |                             |
|---------------|--------|--------|--------|-----------|-----------------------------|
| GI_37541015-S | 97.3   | 92.3   | 91.7   | LOC374396 | <a href="#">XM 350834.1</a> |
| GI_37541019-S | 978.9  | 996.2  | 1053.7 | LOC144097 | <a href="#">XM 290508.2</a> |
| GI_37541020-S | 105.1  | 136.1  | 123    | HSMDPKIN  | <a href="#">XM 290516.3</a> |
| GI_37541022-S | 350.7  | 407.3  | 487.5  | KIAA0404  | <a href="#">XM 290517.2</a> |
| GI_37541024-S | 286.8  | 355.9  | 307.5  | LOC256676 | <a href="#">XM 172852.2</a> |
| GI_37541026-S | 116.7  | 112.1  | 99.2   | LOC374398 | <a href="#">XM 350835.1</a> |
| GI_37541030-S | 189.8  | 216.7  | 185.9  | LOC374400 | <a href="#">XM 350837.1</a> |
| GI_37541032-S | 128.8  | 142.7  | 119    | LOC374401 | <a href="#">XM 350838.1</a> |
| GI_37541034-S | 3534.4 | 3336.6 | 3353.4 | SF3B2     | <a href="#">XM 290506.2</a> |
| GI_37541036-S | 321.6  | 401.8  | 355.3  | LOC374402 | <a href="#">XM 353011.1</a> |
| GI_37541038-S | 255.1  | 323.1  | 337.8  | LOC254359 | <a href="#">XM 170667.3</a> |
| GI_37541039-S | 511.9  | 596.7  | 611.3  | LOC338692 | <a href="#">XM 290509.3</a> |
| GI_37541042-S | 99.7   | 111.9  | 102.3  | LOC132740 | <a href="#">XM 059598.6</a> |
| GI_37541044-S | 98.4   | 112.7  | 101.4  | LOC374404 | <a href="#">XM 350840.1</a> |
| GI_37541046-S | 106.7  | 113.8  | 109.6  | LOC158490 | <a href="#">XM 088585.8</a> |
| GI_37541062-S | 104.2  | 122.6  | 105.4  | LOC219428 | <a href="#">XM 166868.3</a> |
| GI_37541064-S | 110.8  | 111    | 114.4  | LOC219429 | <a href="#">XM 166869.3</a> |
| GI_37541066-S | 93.5   | 103.1  | 101.9  | LOC219431 | <a href="#">XM 166871.2</a> |
| GI_37541068-S | 145.1  | 173.5  | 161.9  | LOC219432 | <a href="#">XM 166872.5</a> |
| GI_37541070-S | 149.8  | 180.8  | 163.6  | LOC376006 | <a href="#">XM 352029.1</a> |
| GI_37541072-S | 192.1  | 219.5  | 209.3  | LOC219436 | <a href="#">XM 166877.6</a> |
| GI_37541076-S | 117.1  | 111.2  | 117.9  | LOC219449 | <a href="#">XM 166809.3</a> |
| GI_37541079-S | 97.4   | 100.3  | 96.2   | LOC219453 | <a href="#">XM 166813.2</a> |
| GI_37541081-S | 96.2   | 91.4   | 100.9  | LOC219462 | <a href="#">XM 166818.2</a> |
| GI_37541085-S | 156.5  | 168.8  | 157.2  | LOC219464 | <a href="#">XM 166820.2</a> |
| GI_37541087-S | 65.6   | 75.3   | 63.8   | LOC219469 | <a href="#">XM 166823.2</a> |
| GI_37541091-S | 128.5  | 138.2  | 134.5  | LOC219417 | <a href="#">XM 166805.4</a> |
| GI_37541095-S | 175.7  | 184.3  | 189.8  | LOC219484 | <a href="#">XM 166835.4</a> |
| GI_37541097-S | 99.3   | 101.8  | 99.7   | LOC376012 | <a href="#">XM 352033.1</a> |
| GI_37541101-S | 84.9   | 88.9   | 82     | LOC376013 | <a href="#">XM 352034.1</a> |
| GI_37541103-S | 131.8  | 144.3  | 130.3  | LOC338675 | <a href="#">XM 291862.2</a> |
| GI_37541105-S | 145.6  | 151.7  | 142.2  | LOC376015 | <a href="#">XM 352035.1</a> |
| GI_37541107-S | 82.6   | 100.4  | 95.7   | LOC376016 | <a href="#">XM 352036.1</a> |
| GI_37541109-S | 100.5  | 123    | 123.4  | LOC283189 | <a href="#">XM 210193.2</a> |
| GI_37541113-S | 121.4  | 140.5  | 127.3  | LOC283193 | <a href="#">XM 210196.3</a> |
| GI_37541115-S | 236    | 250.4  | 256    | LOC219952 | <a href="#">XM 166910.3</a> |
| GI_37541119-S | 107.5  | 118.2  | 101.5  | LOC219956 | <a href="#">XM 166914.3</a> |
| GI_37541121-S | 108    | 101.9  | 90.5   | LOC219957 | <a href="#">XM 166915.3</a> |
| GI_37541125-S | 76.8   | 74.5   | 73.6   | LOC219965 | <a href="#">XM 166923.4</a> |
| GI_37541131-S | 108.1  | 124.5  | 104.4  | KIAA0937  | <a href="#">XM 166213.2</a> |
| GI_37541135-S | 199.4  | 238.6  | 222.3  | LOC341112 | <a href="#">XM 291885.2</a> |
| GI_37541137-S | 199.5  | 275.9  | 249.6  | LOC376022 | <a href="#">XM 352039.1</a> |
| GI_37541141-S | 140.5  | 159.9  | 152.8  | LOC219982 | <a href="#">XM 166899.3</a> |
| GI_37541149-S | 93     | 93.9   | 90.1   | LOC376024 | <a href="#">XM 352040.1</a> |

|               |        |        |        |            |                             |                                |
|---------------|--------|--------|--------|------------|-----------------------------|--------------------------------|
| GI_37541153-S | 106.5  | 136.2  | 131    | LOC219986  | <a href="#">XM_166903.3</a> |                                |
| GI_37541155-S | 267.8  | 277.3  | 240    | LOC376025  | <a href="#">XM_352041.1</a> |                                |
| GI_37541157-S | 104.1  | 110.6  | 113.2  | LOC339022  | <a href="#">XM_294775.2</a> |                                |
| GI_37541163-S | 135.9  | 123.3  | 121.7  | LOC341116  | <a href="#">XM_291890.3</a> |                                |
| GI_37541166-S | 69     | 81.4   | 74.3   | LOC376030  | <a href="#">XM_352043.1</a> |                                |
| GI_37541173-S | 92.6   | 82.3   | 79.8   | LOC221091  | <a href="#">XM_169026.3</a> | MGC61707                       |
| GI_37541176-S | 171.5  | 198.5  | 174.9  | KIAA1394   | <a href="#">XM_208522.2</a> |                                |
| GI_37541178-S | 126.4  | 128.4  | 127.8  | LOC376035  | <a href="#">XM_352045.1</a> |                                |
| GI_37541181-S | 110.1  | 122    | 113.2  | LOC376036  | <a href="#">XM_352046.1</a> |                                |
| GI_37541187-S | 3074.5 | 2986.8 | 2270.6 | LOC374596  | <a href="#">XM_350967.1</a> |                                |
| GI_37541189-S | 132.5  | 143.5  | 134.8  | LOC374597  | <a href="#">XM_350968.1</a> |                                |
| GI_37541230-S | 95.9   | 116.9  | 88.8   | LOC374606  | <a href="#">XM_353082.1</a> |                                |
| GI_37541238-S | 99.3   | 96.1   | 94.9   | LOC374669  | <a href="#">XM_351020.1</a> |                                |
| GI_37541248-S | 169.9  | 164.2  | 124.3  | LOC374673  | <a href="#">XM_353097.1</a> |                                |
| GI_37541267-S | 321.8  | 397.1  | 349.4  | DKFZP586P0 | <a href="#">XM_170681.4</a> |                                |
| GI_37541275-S | 205.3  | 241.8  | 205.9  | LOC374410  | <a href="#">XM_350844.1</a> |                                |
| GI_37541277-S | 88.3   | 105.5  | 107.7  | LOC374411  | <a href="#">XM_350845.1</a> |                                |
| GI_37541289-S | 126.7  | 131.5  | 123.3  | ODZ4       | <a href="#">XM_166254.3</a> |                                |
| GI_37541291-S | 100.6  | 121.3  | 123.4  | LOC374416  | <a href="#">XM_350850.1</a> |                                |
| GI_37541293-S | 183.3  | 207.9  | 180.7  | LOC283226  | <a href="#">XM_208554.2</a> |                                |
| GI_37541295-S | 102.2  | 127.2  | 105.8  | LOC374417  | <a href="#">XM_353014.1</a> |                                |
| GI_37541307-S | 127.8  | 144    | 130.5  | LOC376042  | <a href="#">XM_352049.1</a> |                                |
| GI_37541311-S | 159.4  | 173.3  | 177.5  | LOC341152  | <a href="#">XM_291892.2</a> |                                |
| GI_37541313-S | 87.1   | 100.7  | 79.6   | MAP6       | <a href="#">XM_166256.5</a> |                                |
| GI_37541315-S | 185.8  | 219.8  | 203.7  | LOC283219  | <a href="#">XM_208568.2</a> |                                |
| GI_37541322-S | 98.4   | 107.6  | 101.6  | LOC340968  | <a href="#">XM_291786.2</a> |                                |
| GI_37541328-S | 89     | 90.6   | 98.2   | LOC374369  | <a href="#">XM_352999.1</a> |                                |
| GI_37541330-S | 119.7  | 118.7  | 120.7  | LOC374370  | <a href="#">XM_353000.1</a> |                                |
| GI_37541334-S | 102.3  | 116.6  | 104.7  | LOC374372  | <a href="#">XM_350818.1</a> |                                |
| GI_37541336-S | 89.2   | 97.3   | 99.2   | LOC374373  | <a href="#">XM_350819.1</a> |                                |
| GI_37541340-S | 147.3  | 1133.3 | 146.1  | MUC6       | <a href="#">XM_290540.2</a> | molecular cellular_co response |
| GI_37541342-S | 107.8  | 135.6  | 118.6  | LOC338731  | <a href="#">XM_294688.3</a> |                                |
| GI_37541343-S | 256.4  | 313.6  | 276.8  | DKFZp761L1 | <a href="#">XM_352003.1</a> |                                |
| GI_37541350-S | 358.1  | 440.2  | 382.7  | LOC119749  | <a href="#">XM_061656.8</a> |                                |
| GI_37541353-S | 121.5  | 121.6  | 112    | LOC374284  | <a href="#">XM_352911.1</a> |                                |
| GI_37541357-S | 98.2   | 115.3  | 115.7  | LOC374688  | <a href="#">XM_351038.1</a> |                                |
| GI_37541359-S | 107    | 116.3  | 101.4  | LOC374689  | <a href="#">XM_353102.1</a> |                                |
| GI_37541361-S | 105.3  | 106.3  | 103.8  | LOC374690  | <a href="#">XM_353103.1</a> |                                |
| GI_37541363-S | 866    | 793.1  | 638.2  | DKFZP564M  | <a href="#">XM_085525.4</a> |                                |
| GI_37541367-S | 85.5   | 80.5   | 92.3   | LOC92017   | <a href="#">XM_042234.4</a> |                                |
| GI_37541369-S | 194.4  | 183.7  | 151.1  | LOC374692  | <a href="#">XM_353104.1</a> |                                |
| GI_37541381-S | 159.8  | 186.8  | 192.9  | LOC374699  | <a href="#">XM_353105.1</a> |                                |
| GI_37541385-S | 94.8   | 114.3  | 96.4   | LOC374700  | <a href="#">XM_351045.1</a> |                                |
| GI_37541387-S | 220.7  | 249.3  | 206.5  | LOC374701  | <a href="#">XM_353106.1</a> |                                |

|               |        |        |        |            |                             |       |       |
|---------------|--------|--------|--------|------------|-----------------------------|-------|-------|
| GI_37541389-S | 124.9  | 139.1  | 133.9  | LOC92267   | <a href="#">XM_043979.4</a> |       |       |
| GI_37541395-S | 155    | 161.3  | 170    | LOC374703  | <a href="#">XM_351046.1</a> |       |       |
| GI_37541408-S | 84.1   | 90.6   | 108.9  | HS3ST4     | <a href="#">XM_056254.5</a> |       |       |
| GI_37541410-S | 357.7  | 347.7  | 325.2  | KIAA0556   | <a href="#">XM_044632.4</a> |       |       |
| GI_37541412-S | 3299.5 | 3148.5 | 2763.3 | XPO6       | <a href="#">XM_055195.5</a> |       |       |
| GI_37541417-S | 189.3  | 245.5  | 188.7  | LOC283816  | <a href="#">XM_208859.2</a> |       |       |
| GI_37541419-S | 171    | 199.2  | 169.5  | KIAA0251   | <a href="#">XM_352158.1</a> | lyase | amino |
| GI_37541423-S | 108    | 124.3  | 118    | LOC146110  | <a href="#">XM_018432.3</a> |       |       |
| GI_37541425-S | 148.6  | 162.2  | 148.6  | LOC124274  | <a href="#">XM_064062.5</a> |       |       |
| GI_37541427-S | 103.8  | 119.7  | 99     | LOC342293  | <a href="#">XM_292468.3</a> |       |       |
| GI_37541429-S | 126.7  | 134.6  | 120    | LOC342357  | <a href="#">XM_292504.2</a> |       |       |
| GI_37541433-S | 91     | 91.8   | 99.1   | LOC376316  | <a href="#">XM_352161.1</a> |       |       |
| GI_37541444-S | 116.4  | 134.1  | 117.5  | LOC120146  | <a href="#">XM_061890.8</a> |       |       |
| GI_37541450-S | 112.4  | 112.2  | 103.5  | FAT3       | <a href="#">XM_061871.6</a> |       |       |
| GI_37541452-S | 132.9  | 141.1  | 122.3  | KIAA1731   | <a href="#">XM_350854.1</a> |       |       |
| GI_37541454-S | 202    | 231.8  | 223.5  | LOC374421  | <a href="#">XM_350855.1</a> |       |       |
| GI_37541456-S | 117.8  | 130.9  | 115.1  | LOC374422  | <a href="#">XM_350856.1</a> |       |       |
| GI_37541458-S | 79.4   | 78.5   | 71.1   | LOC374423  | <a href="#">XM_350857.1</a> |       |       |
| GI_37541460-S | 90.9   | 97.1   | 87.6   | LOC341208  | <a href="#">XM_291947.3</a> |       |       |
| GI_37541464-S | 82     | 91.2   | 87.5   | LOC120126  | <a href="#">XM_061880.2</a> |       |       |
| GI_37541466-S | 111.1  | 94.3   | 93.4   | LOC376047  | <a href="#">XM_352050.1</a> |       |       |
| GI_37541470-S | 152.7  | 184.1  | 174.7  | LOC376052  | <a href="#">XM_352052.1</a> |       |       |
| GI_37541474-S | 91.6   | 105.9  | 84.2   | LOC120105  | <a href="#">XM_061864.3</a> |       |       |
| GI_37541478-S | 101.8  | 114.2  | 105.3  | LOC341202  | <a href="#">XM_291943.3</a> |       |       |
| GI_37541480-S | 90.2   | 107    | 106    | LOC376058  | <a href="#">XM_352054.1</a> |       |       |
| GI_37541482-S | 223.3  | 274.1  | 248.8  | LOC120082  | <a href="#">XM_061849.7</a> |       |       |
| GI_37541488-S | 123    | 158.1  | 138.1  | LOC374734  | <a href="#">XM_353115.1</a> |       |       |
| GI_37541492-S | 94.6   | 92.4   | 83.3   | KIAA1005   | <a href="#">XM_051197.6</a> |       |       |
| GI_37541493-S | 911.7  | 1143.9 | 1215.4 | FTO        | <a href="#">XM_051200.5</a> |       |       |
| GI_37541506-S | 938.2  | 941.7  | 866.3  | DKFZP434K0 | <a href="#">XM_166276.4</a> |       |       |
| GI_37541508-S | 160.9  | 199.1  | 180    | LOC374738  | <a href="#">XM_351072.1</a> |       |       |
| GI_37541510-S | 78.1   | 88.4   | 85     | LOC374739  | <a href="#">XM_351073.1</a> |       |       |
| GI_37541512-S | 111.7  | 105.9  | 110.2  | LOC374740  | <a href="#">XM_353120.1</a> |       |       |
| GI_37541514-S | 106.4  | 117.4  | 124    | LOC146212  | <a href="#">XM_085367.4</a> |       |       |
| GI_37541516-S | 221.8  | 295.3  | 297.3  | KIAA1464   | <a href="#">XM_043069.5</a> |       |       |
| GI_37541518-S | 104.3  | 110.4  | 118.7  | ZFP90      | <a href="#">XM_085375.7</a> |       |       |
| GI_37541526-S | 230.2  | 278.7  | 243.4  | LOC92154   | <a href="#">XM_208937.4</a> |       |       |
| GI_37541528-S | 130.7  | 135.8  | 131    | LOC374743  | <a href="#">XM_351076.1</a> |       |       |
| GI_37541530-S | 112.1  | 107.1  | 90.3   | FLJ14665   | <a href="#">XM_351077.1</a> |       |       |
| GI_37541532-S | 325.3  | 352.6  | 359.5  | KIAA0931   | <a href="#">XM_041191.5</a> |       |       |
| GI_37541534-S | 119.6  | 122.1  | 110.7  | LOC376351  | <a href="#">XM_352179.1</a> |       |       |
| GI_37541536-S | 184.1  | 230.2  | 189.7  | LOC376353  | <a href="#">XM_352180.1</a> |       |       |
| GI_37541538-S | 243.2  | 235.9  | 225    | LOC146206  | <a href="#">XM_085383.5</a> |       |       |
| GI_37541540-S | 97.7   | 101.8  | 92.1   | LOC376355  | <a href="#">XM_352181.1</a> |       |       |

|               |         |        |       |           |                              |
|---------------|---------|--------|-------|-----------|------------------------------|
| GI_37541551-S | 14234.2 | 12628  | 10889 | LOC376348 | <a href="#">XM_352178.1</a>  |
| GI_37541554-S | 100.9   | 104.4  | 101.9 | SNAI3     | <a href="#">XM_351083.1</a>  |
| GI_37541558-S | 177.2   | 212.1  | 202.7 | LOC374754 | <a href="#">XM_351085.1</a>  |
| GI_37541560-S | 103.8   | 108.1  | 97.8  | LOC374755 | <a href="#">XM_353126.1</a>  |
| GI_37541568-S | 144     | 150    | 137.1 | KIAA1858  | <a href="#">XM_040592.4</a>  |
| GI_37541570-S | 327.7   | 298.3  | 286.4 | LOC348180 | <a href="#">XM_352185.1</a>  |
| GI_37541572-S | 133     | 139.6  | 124.3 | LOC376362 | <a href="#">XM_352186.1</a>  |
| GI_37541581-S | 103.3   | 112.6  | 96.7  | MUC5B     | <a href="#">XM_039877.8</a>  |
| GI_37541583-S | 98.4    | 113.7  | 99    | LOC374374 | <a href="#">XM_353002.1</a>  |
| GI_37541588-S | 253.6   | 321.9  | 291.3 | CNGA4     | <a href="#">XM_290552.2</a>  |
| GI_37541590-S | 94.8    | 90.9   | 92.2  | LOC196337 | <a href="#">XM_113696.2</a>  |
| GI_37541606-S | 99.7    | 87     | 102.2 | LOC374380 | <a href="#">XM_353004.1</a>  |
| GI_37541611-S | 98.1    | 115.5  | 112.9 | LOC374381 | <a href="#">XM_350825.1</a>  |
| GI_37541613-S | 81.4    | 88.8   | 95.7  | LOC374382 | <a href="#">XM_353005.1</a>  |
| GI_37541615-S | 85.7    | 95.6   | 89.5  | LOC374383 | <a href="#">XM_350826.1</a>  |
| GI_37541617-S | 163.2   | 198.3  | 163.8 | FLJ39441  | <a href="#">XM_084736.7</a>  |
| GI_37541618-S | 110.9   | 97.6   | 113.6 | LOC203859 | <a href="#">XM_115009.4</a>  |
| GI_37541622-S | 117.5   | 128.5  | 127.7 | LOC196296 | <a href="#">XM_113688.3</a>  |
| GI_37541624-S | 137.1   | 143.3  | 123.4 | G2        | <a href="#">XM_039515.10</a> |
| GI_37541626-S | 84.2    | 93.7   | 82.4  | LOC374385 | <a href="#">XM_353006.1</a>  |
| GI_37541628-S | 124.8   | 118.3  | 119.5 | LOC374386 | <a href="#">XM_353007.1</a>  |
| GI_37541632-S | 178.9   | 204.2  | 197   | LRP4      | <a href="#">XM_035037.3</a>  |
| GI_37541634-S | 964.9   | 1137.4 | 940.5 | NUP160    | <a href="#">XM_113678.4</a>  |
| GI_37541640-S | 99.2    | 103.5  | 95.6  | LOC283257 | <a href="#">XM_208060.2</a>  |
| GI_37541642-S | 232     | 300.5  | 260.5 | MRGE      | <a href="#">XM_171536.4</a>  |
| GI_37541647-S | 106.3   | 104.5  | 104.4 | LOC340977 | <a href="#">XM_291793.3</a>  |
| GI_37541657-S | 120.4   | 133.5  | 119.3 | LOC143496 | <a href="#">XM_089858.6</a>  |
| GI_37541659-S | 97.3    | 110.4  | 105.5 | LOC119775 | <a href="#">XM_061677.2</a>  |
| GI_37541661-S | 205.9   | 245    | 209.3 | LOC375962 | <a href="#">XM_352007.1</a>  |
| GI_37541665-S | 222.3   | 264.7  | 244.5 | LOC143502 | <a href="#">XM_089863.4</a>  |
| GI_37541667-S | 190.7   | 245.5  | 214.3 | LOC375963 | <a href="#">XM_352008.1</a>  |
| GI_37541669-S | 106.4   | 88.6   | 100.8 | LOC119696 | <a href="#">XM_061628.3</a>  |
| GI_37541671-S | 139     | 161.1  | 153.7 | LOC119691 | <a href="#">XM_061623.2</a>  |
| GI_37541673-S | 128.7   | 153.5  | 142.8 | LOC119689 | <a href="#">XM_061621.2</a>  |
| GI_37541675-S | 155.1   | 178.2  | 157   | LOC119687 | <a href="#">XM_061619.2</a>  |
| GI_37541679-S | 159.6   | 165.5  | 171.2 | LOC119684 | <a href="#">XM_061616.2</a>  |
| GI_37541681-S | 99.9    | 111.7  | 102.4 | LOC283110 | <a href="#">XM_210180.2</a>  |
| GI_37541683-S | 384.8   | 432.3  | 411.2 | LOC283111 | <a href="#">XM_210181.4</a>  |
| GI_37541689-S | 156.9   | 167    | 155.3 | LOC340980 | <a href="#">XM_291806.2</a>  |
| GI_37541691-S | 106.1   | 105.4  | 97.3  | LOC375969 | <a href="#">XM_352009.1</a>  |
| GI_37541693-S | 140.5   | 148    | 125.8 | LOC375970 | <a href="#">XM_352010.1</a>  |
| GI_37541695-S | 92.9    | 103    | 96.3  | LOC375971 | <a href="#">XM_352011.1</a>  |
| GI_37541697-S | 143.3   | 162.2  | 139.3 | LOC375972 | <a href="#">XM_352012.1</a>  |
| GI_37541699-S | 134.8   | 154.3  | 143.5 | LOC375973 | <a href="#">XM_352013.1</a>  |



|               |        |        |       |           |                             |                                   |
|---------------|--------|--------|-------|-----------|-----------------------------|-----------------------------------|
| GI_37541701-S | 371.6  | 450.2  | 398.4 | LOC375974 | <a href="#">XM 352014.1</a> |                                   |
| GI_37541703-S | 110.4  | 115.8  | 106.6 | LOC375975 | <a href="#">XM 352015.1</a> |                                   |
| GI_37541705-S | 143.4  | 165.4  | 166.1 | LOC375976 | <a href="#">XM 352016.1</a> |                                   |
| GI_37541707-S | 136.2  | 137.9  | 136.4 | LOC375977 | <a href="#">XM 352017.1</a> |                                   |
| GI_37541709-S | 100.3  | 104.5  | 97.8  | LOC338751 | <a href="#">XM 291977.2</a> |                                   |
| GI_37541711-S | 94.6   | 100.9  | 103.6 | LOC120793 | <a href="#">XM 062269.8</a> |                                   |
| GI_37541713-S | 101    | 94.6   | 82.7  | LOC120796 | <a href="#">XM 062272.9</a> |                                   |
| GI_37541715-S | 475.1  | 567.5  | 471.6 | LOC338755 | <a href="#">XM 291980.3</a> |                                   |
| GI_37541721-S | 151.8  | 193.6  | 163.2 | OR10A3    | <a href="#">XM 291986.3</a> |                                   |
| GI_37541723-S | 85.7   | 94.7   | 90.2  | LOC283102 | <a href="#">XM 210177.3</a> |                                   |
| GI_37541725-S | 107.6  | 94.5   | 85    | LOC119593 | <a href="#">XM 061562.6</a> |                                   |
| GI_37541727-S | 100.5  | 94.1   | 88.1  | LOC338750 | <a href="#">XM 291974.2</a> |                                   |
| GI_37541733-S | 106.8  | 107.8  | 99.3  | LOC340990 | <a href="#">XM 291816.2</a> |                                   |
| GI_37541737-S | 108.8  | 116.3  | 99.3  | LOC120237 | <a href="#">XM 061930.6</a> |                                   |
| GI_37541754-S | 91.1   | 104.6  | 88.9  | LOC219638 | <a href="#">XM 169258.4</a> |                                   |
| GI_37541758-S | 88.8   | 77     | 95.1  | LOC119764 | <a href="#">XM 061666.2</a> |                                   |
| GI_37541760-S | 197.3  | 241.9  | 232   | LOC256148 | <a href="#">XM 171490.2</a> |                                   |
| GI_37541762-S | 265.2  | 343.1  | 305.4 | LOC256144 | <a href="#">XM 171489.4</a> |                                   |
| GI_37541768-S | 125.2  | 148.4  | 129.8 | LOC375995 | <a href="#">XM 352022.1</a> |                                   |
| GI_37541770-S | 130.7  | 119.8  | 119.2 | LOC375996 | <a href="#">XM 352023.1</a> |                                   |
| GI_37541772-S | 78.8   | 88.5   | 84.6  | LOC120824 | <a href="#">XM 062300.3</a> |                                   |
| GI_37541776-S | 147.7  | 168.3  | 134.1 | LOC283117 | <a href="#">XM 210184.3</a> |                                   |
| GI_37541778-S | 119.6  | 128.6  | 124.9 | LOC196346 | <a href="#">XM 115100.2</a> |                                   |
| GI_37541782-S | 106.3  | 101.1  | 93.2  | LOC375998 | <a href="#">XM 352024.1</a> |                                   |
| GI_37541784-S | 95.8   | 104.5  | 116.8 | LOC375999 | <a href="#">XM 352025.1</a> |                                   |
| GI_37541786-S | 304.1  | 388.9  | 364.5 | LOC283092 | <a href="#">XM 210168.3</a> |                                   |
| GI_37541788-S | 107.7  | 123.8  | 124.7 | LOC283093 | <a href="#">XM 210169.2</a> |                                   |
| GI_37541790-S | 225.6  | 257.9  | 228.8 | LOC376000 | <a href="#">XM 352026.1</a> |                                   |
| GI_37541792-S | 108.5  | 112.5  | 117.1 | LOC146439 | <a href="#">XM 085463.3</a> |                                   |
| GI_37541794-S | 125.7  | 144.3  | 129.3 | LOC197350 | <a href="#">XM 113871.4</a> |                                   |
| GI_37541798-S | 67.4   | 87.6   | 67.5  | LOC374686 | <a href="#">XM 353101.1</a> |                                   |
| GI_37541800-S | 114.2  | 118.8  | 109.1 | SRL       | <a href="#">XM 064152.5</a> |                                   |
| GI_37541802-S | 170    | 201.6  | 179.1 | LOC342346 | <a href="#">XM 296817.3</a> |                                   |
| GI_37541804-S | 92.1   | 108.9  | 93.3  | MGRN1     | <a href="#">XM 048119.8</a> | GP2B;CD41B;ITGA2B;RNF156;KIAA0544 |
| GI_37541806-S | 176.5  | 162.8  | 147.3 | LOC196483 | <a href="#">XM 016909.7</a> |                                   |
| GI_37541810-S | 116.7  | 116.3  | 116.7 | KIAA0557  | <a href="#">XM 085507.3</a> |                                   |
| GI_37541812-S | 95.8   | 99.9   | 96.6  | KIAA0420  | <a href="#">XM 032693.2</a> |                                   |
| GI_37541815-S | 206.7  | 263.3  | 301.7 | LOC374751 | <a href="#">XM 353124.1</a> |                                   |
| GI_37541817-S | 94.7   | 77.4   | 84.1  | LOC374752 | <a href="#">XM 353125.1</a> |                                   |
| GI_37541821-S | 92.6   | 90.5   | 92.2  | LOC376361 | <a href="#">XM 352184.1</a> |                                   |
| GI_37541823-S | 262.3  | 261.5  | 267.8 | LOC374731 | <a href="#">XM 353113.1</a> |                                   |
| GI_37541833-S | 327.3  | 333.8  | 263.1 | LOC374744 | <a href="#">XM 351078.1</a> |                                   |
| GI_37541841-S | 1227.7 | 1239.4 | 1105  | FLJ12270  | <a href="#">XM 290704.2</a> |                                   |
| GI_37541843-S | 326    | 399.8  | 363.8 | LOC374746 | <a href="#">XM 351081.1</a> |                                   |

|               |        |        |        |           |                             |       |
|---------------|--------|--------|--------|-----------|-----------------------------|-------|
| GI_37541845-S | 249.3  | 220    | 326.5  | LOC374747 | <a href="#">XM_351082.1</a> |       |
| GI_37541847-S | 139.7  | 161.8  | 155.7  | LOC374748 | <a href="#">XM_353121.1</a> |       |
| GI_37541851-S | 147.4  | 178.8  | 171.4  | LOC146167 | <a href="#">XM_085347.2</a> |       |
| GI_37541855-S | 103.3  | 101.1  | 110.5  | LOC123855 | <a href="#">XM_063871.4</a> |       |
| GI_37541857-S | 229.2  | 268.8  | 234.6  | LOC374750 | <a href="#">XM_353123.1</a> |       |
| GI_37541859-S | 107    | 105.6  | 112    | LOC342409 | <a href="#">XM_292527.2</a> |       |
| GI_37541867-S | 110.6  | 112.8  | 103.4  | LOC376357 | <a href="#">XM_352182.1</a> |       |
| GI_37541874-S | 215.3  | 242.7  | 202.1  | FLJ11183  | <a href="#">XM_352898.1</a> |       |
| GI_37541876-S | 77.4   | 82.5   | 84.5   | LOC338757 | <a href="#">XM_291991.2</a> |       |
| GI_37541878-S | 116.1  | 136.8  | 134.5  | LOC374462 | <a href="#">XM_350882.1</a> |       |
| GI_37541880-S | 102.7  | 107.6  | 100    | LOC144448 | <a href="#">XM_084868.6</a> |       |
| GI_37541888-S | 103.5  | 111.1  | 111    | LOC374464 | <a href="#">XM_353031.1</a> |       |
| GI_37541896-S | 112.6  | 96.8   | 106.1  | LOC374466 | <a href="#">XM_353032.1</a> |       |
| GI_37541900-S | 89.2   | 94.6   | 98.8   | LOC374468 | <a href="#">XM_353033.1</a> |       |
| GI_37541910-S | 109.2  | 133.7  | 104.2  | FLJ38508  | <a href="#">XM_090294.4</a> |       |
| GI_37541916-S | 1004.7 | 856.7  | 925.6  | KIAA1033  | <a href="#">XM_035313.6</a> |       |
| GI_37541920-S | 163.1  | 206.9  | 176.8  | KIAA0789  | <a href="#">XM_033113.3</a> |       |
| GI_37541922-S | 117.9  | 123.1  | 120.9  | LOC283892 | <a href="#">XM_211246.2</a> |       |
| GI_37541926-S | 128.1  | 132.4  | 128.5  | LOC338756 | <a href="#">XM_291989.2</a> |       |
| GI_37541937-S | 3735.6 | 3643   | 2871.4 | LOC376141 | <a href="#">XM_352085.1</a> |       |
| GI_37541941-S | 2360.4 | 2859.6 | 2201.3 | LOC376142 | <a href="#">XM_352086.1</a> |       |
| GI_37541953-S | 176.8  | 203.4  | 237.7  | LOC339088 | <a href="#">XM_290702.2</a> |       |
| GI_37541954-S | 134.2  | 139.5  | 112.2  | LOC376145 | <a href="#">XM_352087.1</a> |       |
| GI_37541958-S | 107.5  | 109.1  | 109.1  | LOC121456 | <a href="#">XM_062645.3</a> |       |
| GI_37541960-S | 235.6  | 322.3  | 274.9  | LOC374716 | <a href="#">XM_353107.1</a> |       |
| GI_37541966-S | 215.9  | 278.3  | 250.9  | LOC374718 | <a href="#">XM_353109.1</a> |       |
| GI_37541968-S | 103.2  | 117.7  | 107.4  | LOC283350 | <a href="#">XM_208635.2</a> |       |
| GI_37541974-S | 126.9  | 116.7  | 112.3  | LOC376148 | <a href="#">XM_352089.1</a> |       |
| GI_37541982-S | 124.9  | 128.3  | 128    | LOC374720 | <a href="#">XM_351063.1</a> |       |
| GI_37541986-S | 449.5  | 548.4  | 506    | LOC374721 | <a href="#">XM_351064.1</a> |       |
| GI_37541988-S | 125    | 128.2  | 109.6  | ASCL4     | <a href="#">XM_062690.3</a> | HASH4 |
| GI_37541994-S | 135    | 163.7  | 147.7  | LOC146489 | <a href="#">XM_047734.8</a> |       |
| GI_37541996-S | 104.3  | 115.5  | 99.3   | LOC374722 | <a href="#">XM_353111.1</a> |       |
| GI_37541998-S | 85.6   | 87.2   | 85.8   | LOC283957 | <a href="#">XM_208142.2</a> |       |
| GI_37542000-S | 177.3  | 271.2  | 211.1  | LOC374723 | <a href="#">XM_351066.1</a> |       |
| GI_37542004-S | 190.2  | 247.1  | 214.3  | LOC374725 | <a href="#">XM_351068.1</a> |       |
| GI_37542014-S | 103.6  | 105.5  | 116.7  | KIAA0326  | <a href="#">XM_034819.4</a> |       |
| GI_37542018-S | 126.2  | 112.7  | 118.8  | LOC376322 | <a href="#">XM_352165.1</a> |       |
| GI_37542022-S | 98.2   | 106.6  | 101.3  | LOC124411 | <a href="#">XM_058804.5</a> |       |
| GI_37542024-S | 85.7   | 93.4   | 85     | LOC376324 | <a href="#">XM_352166.1</a> |       |
| GI_37542034-S | 156.1  | 174.9  | 163.8  | LOC339133 | <a href="#">XM_292573.3</a> |       |
| GI_37542036-S | 82.6   | 94.2   | 86.5   | LOC124149 | <a href="#">XM_064003.6</a> |       |
| GI_37542038-S | 93.4   | 110.3  | 97.3   | LOC374733 | <a href="#">XM_351071.1</a> |       |
| GI_37542040-S | 165.8  | 154.7  | 145    | LOC376343 | <a href="#">XM_352175.1</a> |       |

|               |        |        |        |            |                              |        |     |                     |
|---------------|--------|--------|--------|------------|------------------------------|--------|-----|---------------------|
| GI_37542174-S | 1003.9 | 1332.8 | 709.7  | RAB26      | <a href="#">XM_352913.1</a>  | V46133 | GTP | cellular_co protein |
| GI_37542183-S | 194.7  | 155.4  | 223    | LOC339123  | <a href="#">XM_290722.2</a>  |        |     |                     |
| GI_37542187-S | 108.7  | 122.6  | 114.7  | LOC374683  | <a href="#">XM_351034.1</a>  |        |     |                     |
| GI_37542189-S | 221.3  | 252.6  | 233.9  | CRAMP1L    | <a href="#">XM_034570.5</a>  |        |     |                     |
| GI_37542191-S | 275.6  | 336.4  | 324.4  | LOC283871  | <a href="#">XM_208887.2</a>  |        |     |                     |
| GI_37542192-S | 123.6  | 116.3  | 100    | LOC374684  | <a href="#">XM_353099.1</a>  |        |     |                     |
| GI_37542195-S | 204.7  | 199.2  | 191.3  | KIAA1171   | <a href="#">XM_351035.1</a>  |        |     |                     |
| GI_37542198-S | 115.8  | 133.9  | 124.1  | FLJ36208   | <a href="#">XM_208927.3</a>  |        |     |                     |
| GI_37542202-S | 160.7  | 190    | 175    | LOC376295  | <a href="#">XM_352153.1</a>  |        |     |                     |
| GI_37542206-S | 102.8  | 122.3  | 101.3  | LOC376298  | <a href="#">XM_352154.1</a>  |        |     |                     |
| GI_37542208-S | 199.2  | 204.9  | 195.5  | LOC376299  | <a href="#">XM_352155.1</a>  |        |     |                     |
| GI_37542210-S | 302.1  | 380    | 312.3  | LOC342460  | <a href="#">XM_292562.3</a>  |        |     |                     |
| GI_37542212-S | 94.5   | 105.3  | 91.3   | LOC376301  | <a href="#">XM_352156.1</a>  |        |     |                     |
| GI_37542221-S | 117.3  | 123.4  | 113.8  | LOC374729  | <a href="#">XM_351069.1</a>  |        |     |                     |
| GI_37542223-S | 212.4  | 243.5  | 199.1  | LOC374730  | <a href="#">XM_351070.1</a>  |        |     |                     |
| GI_37542225-S | 96.4   | 108    | 101.7  | LOC376332  | <a href="#">XM_352171.1</a>  |        |     |                     |
| GI_37542230-S | 101.8  | 110.5  | 104.5  | LOC376333  | <a href="#">XM_352172.1</a>  |        |     |                     |
| GI_37542232-S | 214    | 236.4  | 221.2  | LOC376336  | <a href="#">XM_352173.1</a>  |        |     |                     |
| GI_37542474-S | 110.4  | 103.8  | 95.6   | LOC374820  | <a href="#">XM_353147.1</a>  |        |     |                     |
| GI_37542476-S | 95.7   | 104    | 97.7   | LOC374821  | <a href="#">XM_353148.1</a>  |        |     |                     |
| GI_37542480-S | 335.2  | 353.7  | 305.6  | LOC374822  | <a href="#">XM_353149.1</a>  |        |     |                     |
| GI_37542482-S | 156.6  | 173.2  | 162.8  | LOC374823  | <a href="#">XM_351143.1</a>  |        |     |                     |
| GI_37542486-S | 312.8  | 335.5  | 367    | LOC283989  | <a href="#">XM_208944.4</a>  |        |     |                     |
| GI_37542491-S | 576.4  | 633.6  | 645.4  | KIAA1753   | <a href="#">XM_036115.4</a>  |        |     |                     |
| GI_37542499-S | 355.3  | 445.8  | 378.2  | LOC374827  | <a href="#">XM_353152.1</a>  |        |     |                     |
| GI_37542501-S | 320.5  | 296.9  | 255.7  | LOC125061  | <a href="#">XM_058889.5</a>  |        |     |                     |
| GI_37542503-S | 125.5  | 126    | 119.7  | LOC374828  | <a href="#">XM_353153.1</a>  |        |     |                     |
| GI_37542511-S | 94.5   | 119.7  | 106.9  | LOC376418  | <a href="#">XM_352215.1</a>  |        |     |                     |
| GI_37542515-S | 202.1  | 216.4  | 205.1  | LOC376422  | <a href="#">XM_352217.1</a>  |        |     |                     |
| GI_37542517-S | 109.9  | 100.4  | 100.6  | KIAA1917   | <a href="#">XM_290732.3</a>  |        |     |                     |
| GI_37542666-S | 125.7  | 138.8  | 117.8  | LOC374833  | <a href="#">XM_351147.1</a>  |        |     |                     |
| GI_37542672-S | 1310   | 1415.2 | 1330.2 | LOC284207  | <a href="#">XM_209073.3</a>  |        |     |                     |
| GI_37542851-S | 169.4  | 155.9  | 109.9  | POU6F1     | <a href="#">XM_352901.1</a>  |        |     |                     |
| GI_37542857-S | 86.1   | 96.1   | 80.9   | LOC144245  | <a href="#">XM_047770.6</a>  |        |     |                     |
| GI_37542859-S | 1864.7 | 1756.1 | 1630.5 | DKFZp313MC | <a href="#">XM_113743.4</a>  |        |     |                     |
| GI_37542863-S | 240.4  | 276.4  | 233.1  | LOC374450  | <a href="#">XM_353025.1</a>  |        |     |                     |
| GI_37542865-S | 96.1   | 100.8  | 89     | LOC374451  | <a href="#">XM_353026.1</a>  |        |     |                     |
| GI_37542881-S | 171.9  | 214.5  | 190.1  | LOC283389  | <a href="#">XM_211009.3</a>  |        |     |                     |
| GI_37542883-S | 143    | 160.3  | 150.7  | LOC255411  | <a href="#">XM_170708.3</a>  |        |     |                     |
| GI_37542884-S | 125.1  | 151.2  | 109.9  | KIAA1602   | <a href="#">XM_035497.10</a> |        |     |                     |
| GI_37542886-S | 105.7  | 103.9  | 100.7  | LOC121006  | <a href="#">XM_290556.3</a>  |        |     |                     |
| GI_37542888-S | 240    | 306.6  | 260.8  | LOC374453  | <a href="#">XM_353027.1</a>  |        |     |                     |
| GI_37542896-S | 106.8  | 124.7  | 100.1  | LOC374455  | <a href="#">XM_353028.1</a>  |        |     |                     |
| GI_37542906-S | 164.3  | 176.7  | 170.6  | KIAA0286   | <a href="#">XM_043118.5</a>  |        |     |                     |

|               |        |        |        |           |                             |
|---------------|--------|--------|--------|-----------|-----------------------------|
| GI_37542910-S | 243.1  | 292.9  | 249    | LOC256176 | <a href="#">XM 172889.4</a> |
| GI_37542911-S | 116.7  | 125.1  | 112.3  | LOC374457 | <a href="#">XM 350879.1</a> |
| GI_37542913-S | 108.6  | 111.5  | 130.9  | KIAA1040  | <a href="#">XM 051091.9</a> |
| GI_37542914-S | 130.7  | 137.2  | 127.6  | LOC374458 | <a href="#">XM 350880.1</a> |
| GI_37542922-S | 94     | 94.9   | 99.4   | LOC115749 | <a href="#">XM 056680.5</a> |
| GI_37542926-S | 105.1  | 89.6   | 81.4   | LOC374460 | <a href="#">XM 353029.1</a> |
| GI_37542930-S | 96.1   | 95.9   | 96.9   | LOC374461 | <a href="#">XM 353030.1</a> |
| GI_37542932-S | 132.6  | 138.9  | 116.8  | GRIP1     | <a href="#">XM 290559.3</a> |
| GI_37542940-S | 90.3   | 88.8   | 87.5   | LOC121216 | <a href="#">XM 062520.2</a> |
| GI_37542946-S | 92.1   | 114.9  | 83.2   | LOC283464 | <a href="#">XM 290597.2</a> |
| GI_37542949-S | 113.8  | 120.4  | 107.9  | LOC341568 | <a href="#">XM 292136.2</a> |
| GI_37542951-S | 169.3  | 200.8  | 173.1  | LOC376114 | <a href="#">XM 352074.1</a> |
| GI_37542957-S | 121.2  | 114.8  | 119.4  | LOC341404 | <a href="#">XM 292056.3</a> |
| GI_37542961-S | 128.7  | 130.6  | 110.4  | LOC376116 | <a href="#">XM 352075.1</a> |
| GI_37542963-S | 129.9  | 144.9  | 135.6  | LOC121360 | <a href="#">XM 062594.2</a> |
| GI_37542965-S | 109.5  | 121.4  | 116.2  | LOC121364 | <a href="#">XM 062598.3</a> |
| GI_37542967-S | 110    | 113.8  | 100.5  | LOC254783 | <a href="#">XM 171578.3</a> |
| GI_37542969-S | 110.5  | 153.9  | 122.8  | LOC254786 | <a href="#">XM 171581.3</a> |
| GI_37542971-S | 195.4  | 233.3  | 211    | LOC376118 | <a href="#">XM 352076.1</a> |
| GI_37542975-S | 105.1  | 113.2  | 97.8   | LOC341416 | <a href="#">XM 292049.3</a> |
| GI_37542977-S | 148.8  | 182.2  | 185.7  | LOC341418 | <a href="#">XM 292051.3</a> |
| GI_37542979-S | 108.5  | 124.2  | 115.2  | LOC121130 | <a href="#">XM 062468.4</a> |
| GI_37542981-S | 331.3  | 376.6  | 522.2  | LOC283377 | <a href="#">XM 208647.2</a> |
| GI_37542986-S | 118.9  | 134.7  | 116.9  | LOC376125 | <a href="#">XM 352078.1</a> |
| GI_37542990-S | 92.1   | 98.3   | 91.3   | KIAA1157  | <a href="#">XM 051093.3</a> |
| GI_37542993-S | 144    | 170.2  | 165.2  | LOC376128 | <a href="#">XM 352079.1</a> |
| GI_37542995-S | 989.7  | 1131.7 | 842.7  | LOC341315 | <a href="#">XM 292012.3</a> |
| GI_37542999-S | 106.7  | 127.3  | 109.8  | LOC341333 | <a href="#">XM 296117.2</a> |
| GI_37543001-S | 107.5  | 102.1  | 87.4   | LOC376132 | <a href="#">XM 352080.1</a> |
| GI_37543003-S | 105.4  | 121.5  | 107.1  | LOC376133 | <a href="#">XM 352081.1</a> |
| GI_37543009-S | 5040.2 | 4554.6 | 3592.1 | LOC376138 | <a href="#">XM 352084.1</a> |
| GI_37543181-S | 137    | 147.2  | 132    | LOC376167 | <a href="#">XM 352100.1</a> |
| GI_37543220-S | 166.4  | 182.9  | 230.1  | LOC144404 | <a href="#">XM 084852.8</a> |
| GI_37543222-S | 378.3  | 473.7  | 478.1  | KIAA1076  | <a href="#">XM 037523.8</a> |
| GI_37543269-S | 79.6   | 106.1  | 90.6   | LOC374761 | <a href="#">XM 353129.1</a> |
| GI_37543271-S | 1770.8 | 1282.7 | 1089.6 | KIAA0397  | <a href="#">XM 029438.4</a> |
| GI_37543272-S | 111.4  | 110.4  | 122.1  | LOC201130 | <a href="#">XM 113900.2</a> |
| GI_37543280-S | 97.8   | 106.3  | 96.3   | LOC374763 | <a href="#">XM 351092.1</a> |
| GI_37543282-S | 241.4  | 291.9  | 242.8  | LOC374764 | <a href="#">XM 353130.1</a> |
| GI_37543284-S | 256.3  | 233.7  | 202    | KIAA1871  | <a href="#">XM 290737.2</a> |
| GI_37543286-S | 321.1  | 468.2  | 220.7  | LOC374765 | <a href="#">XM 351093.1</a> |
| GI_37543288-S | 139.1  | 167.8  | 135.3  | KIAA0523  | <a href="#">XM 041964.8</a> |
| GI_37543291-S | 290.9  | 275.2  | 313.3  | LOC374767 | <a href="#">XM 353131.1</a> |
| GI_37543293-S | 538.3  | 541.7  | 440    | MGC49942  | <a href="#">XM 351095.1</a> |

|               |       |       |       |           |                             |         |            |                      |
|---------------|-------|-------|-------|-----------|-----------------------------|---------|------------|----------------------|
| GI_37543295-S | 133.4 | 166.4 | 141.9 | LOC201232 | <a href="#">XM_115484.3</a> |         |            |                      |
| GI_37543318-S | 118.5 | 151.7 | 118.9 | LOC146754 | <a href="#">XM_085578.4</a> |         |            |                      |
| GI_37543322-S | 124.8 | 111.9 | 108.8 | MYH10     | <a href="#">XM_290747.3</a> | NMMHCB  | actin      | kinesin cytokinesi   |
| GI_37543324-S | 126.1 | 157.7 | 143.7 | LOC374769 | <a href="#">XM_351098.1</a> |         |            |                      |
| GI_37543328-S | 186.6 | 208   | 189.6 | LOC201140 | <a href="#">XM_113912.2</a> |         |            |                      |
| GI_37543348-S | 85.7  | 86.9  | 78.8  | LOC374770 | <a href="#">XM_351100.1</a> |         |            |                      |
| GI_37543352-S | 111.2 | 106.1 | 104   | LOC146822 | <a href="#">XM_085606.2</a> |         |            |                      |
| GI_37543356-S | 107.1 | 116.7 | 110.6 | LOC374773 | <a href="#">XM_353132.1</a> |         |            |                      |
| GI_37543359-S | 140.8 | 150   | 146.4 | KIAA0565  | <a href="#">XM_351103.1</a> |         |            |                      |
| GI_37543367-S | 285.3 | 337   | 334.7 | LOC339237 | <a href="#">XM_290780.2</a> |         |            |                      |
| GI_37543372-S | 125.8 | 129.8 | 123.2 | LOC376365 | <a href="#">XM_352187.1</a> |         |            |                      |
| GI_37543390-S | 90.3  | 86.5  | 79.9  | LOC376366 | <a href="#">XM_352188.1</a> |         |            |                      |
| GI_37543394-S | 144   | 175.6 | 176.6 | KIAA1039  | <a href="#">XM_352189.1</a> |         |            |                      |
| GI_37543396-S | 161.3 | 186.1 | 155.4 | LOC124976 | <a href="#">XM_058879.7</a> |         |            |                      |
| GI_37543398-S | 124.6 | 118.6 | 103.2 | LOC376368 | <a href="#">XM_352190.1</a> |         |            |                      |
| GI_37543403-S | 111.3 | 103.7 | 105   | LOC376371 | <a href="#">XM_352191.1</a> |         |            |                      |
| GI_37543439-S | 105.6 | 110.2 | 105.9 | C17orf36  | <a href="#">XM_085689.5</a> |         |            |                      |
| GI_37543441-S | 218.5 | 253.3 | 225.7 | LOC376372 | <a href="#">XM_352192.1</a> |         |            |                      |
| GI_37543443-S | 119.8 | 146.1 | 126.5 | LOC376374 | <a href="#">XM_352193.1</a> |         |            |                      |
| GI_37543449-S | 106.5 | 108.2 | 102   | KIAA1349  | <a href="#">XM_047617.5</a> |         |            |                      |
| GI_37543453-S | 95.1  | 112.2 | 91.5  | LOC96597  | <a href="#">XM_039922.3</a> |         |            |                      |
| GI_37543681-S | 178.7 | 198.9 | 208.3 | LOC341392 | <a href="#">XM_292035.2</a> |         |            |                      |
| GI_37543683-S | 87.7  | 99.7  | 84.8  | LOC338759 | <a href="#">XM_290555.2</a> |         |            |                      |
| GI_37543685-S | 120.1 | 131.3 | 124.1 | LOC360030 | <a href="#">XM_350866.1</a> |         |            |                      |
| GI_37543687-S | 92.5  | 120.1 | 107.7 | KRT10     | <a href="#">XM_352919.1</a> | K10;KPP | structural | intermedia epidermal |
| GI_37543691-S | 95.6  | 95.7  | 93.2  | LOC283321 | <a href="#">XM_208612.2</a> |         |            |                      |
| GI_37543694-S | 156.8 | 196.2 | 187.3 | LOC374437 | <a href="#">XM_353020.1</a> |         |            |                      |
| GI_37543701-S | 99.6  | 96.5  | 113.4 | KIAA1501  | <a href="#">XM_290799.3</a> |         |            |                      |
| GI_37543705-S | 104.6 | 108.7 | 100.9 | KIAA1684  | <a href="#">XM_290806.2</a> |         |            |                      |
| GI_37543709-S | 100.1 | 98.1  | 97    | LOC374799 | <a href="#">XM_351127.1</a> |         |            |                      |
| GI_37543713-S | 126.4 | 154.9 | 119.2 | LOC342667 | <a href="#">XM_292673.3</a> |         |            |                      |
| GI_37543738-S | 100.2 | 105   | 99.3  | LOC201181 | <a href="#">XM_113916.4</a> |         |            |                      |
| GI_37543748-S | 246.5 | 271.8 | 407.5 | KIAA1467  | <a href="#">XM_350874.1</a> |         |            |                      |
| GI_37543750-S | 128.6 | 130.2 | 119.8 | LOC376401 | <a href="#">XM_352207.1</a> |         |            |                      |
| GI_37543752-S | 105.3 | 116.5 | 104.7 | LOC342669 | <a href="#">XM_292674.2</a> |         |            |                      |
| GI_37543754-S | 96.9  | 97.8  | 105.3 | LOC338821 | <a href="#">XM_292093.2</a> |         |            |                      |
| GI_37543758-S | 103.3 | 144   | 121.7 | LOC374446 | <a href="#">XM_353021.1</a> |         |            |                      |
| GI_37543760-S | 116.7 | 116.3 | 126.5 | LOC376404 | <a href="#">XM_352208.1</a> |         |            |                      |
| GI_37543768-S | 208.7 | 215.1 | 218   | LOC374448 | <a href="#">XM_353023.1</a> |         |            |                      |
| GI_37543771-S | 124.3 | 137.3 | 125.4 | LOC341371 | <a href="#">XM_292029.3</a> |         |            |                      |
| GI_37543773-S | 191.4 | 223   | 206.5 | LOC341346 | <a href="#">XM_292021.2</a> |         |            |                      |
| GI_37543775-S | 715.6 | 682.1 | 794   | KIAA1340  | <a href="#">XM_044836.8</a> |         |            |                      |
| GI_37543779-S | 338.8 | 373.6 | 353.9 | LOC196394 | <a href="#">XM_113708.3</a> |         |            |                      |
| GI_37543804-S | 95.2  | 101.2 | 89.1  | LOC341370 | <a href="#">XM_292027.2</a> |         |            |                      |

|               |        |        |        |            |                             |
|---------------|--------|--------|--------|------------|-----------------------------|
| GI_37543806-S | 15022  | 18886  | 16059  | LOC376101  | <a href="#">XM 352070.1</a> |
| GI_37543808-S | 100.6  | 95.9   | 74.8   | LOC376102  | <a href="#">XM 352071.1</a> |
| GI_37543816-S | 113    | 137.4  | 124.4  | LOC341359  | <a href="#">XM 292025.3</a> |
| GI_37543871-S | 122.2  | 144    | 109.7  | DNAH10     | <a href="#">XM 113706.4</a> |
| GI_37543873-S | 245.7  | 297    | 291.6  | LOC374483  | <a href="#">XM 350891.1</a> |
| GI_37543875-S | 97.1   | 122.1  | 102.3  | DKFZp761O2 | <a href="#">XM 044062.7</a> |
| GI_37543878-S | 136    | 137.8  | 182    | LOC253934  | <a href="#">XM 172887.2</a> |
| GI_37543880-S | 104.7  | 113.9  | 111.4  | KIAA0318   | <a href="#">XM 044334.4</a> |
| GI_37543890-S | 114.9  | 121.9  | 113.8  | KIAA1786   | <a href="#">XM 038436.9</a> |
| GI_37543892-S | 125.2  | 130.6  | 111.8  | KIAA1906   | <a href="#">XM 055095.3</a> |
| GI_37543896-S | 108.2  | 105.5  | 106.6  | LOC376159  | <a href="#">XM 352095.1</a> |
| GI_37543898-S | 112.6  | 120.2  | 105.3  | LOC160348  | <a href="#">XM 090235.2</a> |
| GI_37543902-S | 108.8  | 115.1  | 107.4  | LOC338792  | <a href="#">XM 292064.2</a> |
| GI_37543906-S | 139.4  | 146.7  | 200.7  | LOC376163  | <a href="#">XM 352098.1</a> |
| GI_37543909-S | 106.1  | 104.2  | 97.6   | LOC376164  | <a href="#">XM 352099.1</a> |
| GI_37543961-S | 176.7  | 212.4  | 182    | LOC374436  | <a href="#">XM 353019.1</a> |
| GI_37543967-S | 154.5  | 191.4  | 177.5  | LOC376084  | <a href="#">XM 352067.1</a> |
| GI_37543969-S | 2900.6 | 4427.8 | 2789.2 | LOC376086  | <a href="#">XM 352068.1</a> |
| GI_37544001-S | 381    | 465.6  | 419.6  | KIAA0553   | <a href="#">XM 290758.2</a> |
| GI_37544003-S | 113.7  | 120.2  | 114.4  | FLJ35848   | <a href="#">XM 290755.2</a> |
| GI_37544007-S | 149.2  | 166.1  | 171    | LOC146909  | <a href="#">XM 085634.4</a> |
| GI_37544009-S | 145.8  | 143    | 151.8  | LOC374804  | <a href="#">XM 353142.1</a> |
| GI_37544011-S | 166.4  | 168.7  | 153.1  | LOC374805  | <a href="#">XM 351130.1</a> |
| GI_37544019-S | 294.3  | 346.3  | 293.1  | LOC374807  | <a href="#">XM 351132.1</a> |
| GI_37544031-S | 141.2  | 154.9  | 148    | LOC253962  | <a href="#">XM 172968.3</a> |
| GI_37544033-S | 855.1  | 960.3  | 729.4  | LOC374811  | <a href="#">XM 351136.1</a> |
| GI_37544037-S | 205.5  | 241.4  | 209.4  | LOC342600  | <a href="#">XM 292624.2</a> |
| GI_37544046-S | 102.3  | 113.1  | 97.3   | LOC374816  | <a href="#">XM 353145.1</a> |
| GI_37544053-S | 114.6  | 141.5  | 117.1  | LOC374817  | <a href="#">XM 353146.1</a> |
| GI_37544055-S | 222.4  | 252.9  | 224    | LOC284021  | <a href="#">XM 211305.4</a> |
| GI_37544061-S | 112.9  | 110.8  | 108    | LOC376406  | <a href="#">XM 352210.1</a> |
| GI_37544063-S | 122    | 143.2  | 127.3  | DKFZp761G2 | <a href="#">XM 046017.6</a> |
| GI_37544071-S | 95.3   | 102.1  | 100.8  | LOC376409  | <a href="#">XM 352211.1</a> |
| GI_37544075-S | 121.3  | 128.8  | 117.4  | LOC124667  | <a href="#">XM 064257.5</a> |
| GI_37544079-S | 103.5  | 112.2  | 99.7   | OR4D1      | <a href="#">XM 292627.3</a> |
| GI_37544081-S | 104.8  | 102    | 92.1   | LOC124538  | <a href="#">XM 064177.3</a> |
| GI_37544110-S | 737.6  | 638.9  | 514.2  | LOC121642  | <a href="#">XM 058581.9</a> |
| GI_37544111-S | 90.7   | 108    | 94.2   | LOC374473  | <a href="#">XM 353035.1</a> |
| GI_37544113-S | 112.5  | 106.3  | 110.4  | FOXN4      | <a href="#">XM 062735.6</a> |
| GI_37544115-S | 95.7   | 87.1   | 84     | LOC374474  | <a href="#">XM 353036.1</a> |
| GI_37544117-S | 89     | 101.2  | 93.5   | CUTL2      | <a href="#">XM 027045.9</a> |
| GI_37544121-S | 132.2  | 130.7  | 121.7  | LOC374476  | <a href="#">XM 353037.1</a> |
| GI_37544123-S | 110.8  | 124.4  | 97.7   | LOC374477  | <a href="#">XM 353038.1</a> |
| GI_37544127-S | 93.6   | 96.3   | 97.3   | LOC374478  | <a href="#">XM 353039.1</a> |

|               |        |        |        |           |                             |
|---------------|--------|--------|--------|-----------|-----------------------------|
| GI_37544129-S | 96     | 117.8  | 104.2  | LOC374479 | <a href="#">XM 350889.1</a> |
| GI_37544131-S | 121.1  | 142.6  | 125.5  | LOC92558  | <a href="#">XM 045787.8</a> |
| GI_37544141-S | 367.9  | 391.2  | 294.5  | LOC376156 | <a href="#">XM 352094.1</a> |
| GI_37544434-S | 135.2  | 144.6  | 116.2  | LOC374784 | <a href="#">XM 351113.1</a> |
| GI_37544436-S | 1812.7 | 1110.9 | 1434.1 | LOC374785 | <a href="#">XM 353135.1</a> |
| GI_37544450-S | 109.4  | 123    | 115.1  | LOC374787 | <a href="#">XM 353136.1</a> |
| GI_37544460-S | 298.1  | 364.3  | 313.4  | LOC124842 | <a href="#">XM 064333.4</a> |
| GI_37544490-S | 93     | 103.9  | 92.8   | LOC376396 | <a href="#">XM 352203.1</a> |
| GI_37544494-S | 110.4  | 139.2  | 110.8  | LOC376400 | <a href="#">XM 352205.1</a> |
| GI_37544497-S | 112.4  | 127.7  | 109.7  | MYO1D     | <a href="#">XM 050041.8</a> |
| GI_37544565-S | 311.9  | 375.6  | 333.2  | KIAA1554  | <a href="#">XM 290768.2</a> |
| GI_37544571-S | 96.4   | 121.4  | 112.9  | LOC146701 | <a href="#">XM 097065.5</a> |
| GI_37544574-S | 120    | 144.2  | 121.8  | LOC374832 | <a href="#">XM 353156.1</a> |
| GI_37544576-S | 189.4  | 240.1  | 220.6  | LOC339226 | <a href="#">XM 294867.3</a> |
| GI_37544578-S | 113.2  | 112.5  | 104.4  | KIAA1447  | <a href="#">XM 351146.1</a> |
| GI_37544582-S | 119.9  | 114.2  | 107.8  | AZI1      | <a href="#">XM 045581.7</a> |
| GI_37544593-S | 134.1  | 179.9  | 160.8  | LOC374758 | <a href="#">XM 351089.1</a> |
| GI_37544650-S | 91.6   | 102.7  | 94.5   | LOC374778 | <a href="#">XM 353134.1</a> |
| GI_37544652-S | 99.5   | 97.5   | 106.7  | LOC374779 | <a href="#">XM 351106.1</a> |
| GI_37544656-S | 93.8   | 91.1   | 85.9   | LOC256223 | <a href="#">XM 170840.2</a> |
| GI_37544658-S | 109.3  | 101    | 96.8   | LOC374781 | <a href="#">XM 351110.1</a> |
| GI_37544666-S | 97     | 89.3   | 85.1   | KIAA0918  | <a href="#">XM 054869.3</a> |
| GI_37544667-S | 3631   | 4355.6 | 4149.7 | USP22     | <a href="#">XM 042698.6</a> |
| GI_37544669-S | 95.5   | 106.2  | 97.4   | LOC374511 | <a href="#">XM 353050.1</a> |
| GI_37544673-S | 84.1   | 83.7   | 88.8   | LOC374512 | <a href="#">XM 353051.1</a> |
| GI_37544677-S | 92.2   | 90.5   | 82.9   | LOC374513 | <a href="#">XM 353052.1</a> |
| GI_37544681-S | 89.6   | 95.7   | 98.7   | LOC196541 | <a href="#">XM 116936.2</a> |
| GI_37544683-S | 113    | 104.3  | 91.9   | LOC376385 | <a href="#">XM 352199.1</a> |
| GI_37544685-S | 146.7  | 174.7  | 154.9  | FLJ40176  | <a href="#">XM 062871.4</a> |
| GI_37544691-S | 132.4  | 160.1  | 138    | LOC144920 | <a href="#">XM 096688.4</a> |
| GI_37544694-S | 315.7  | 306.1  | 360.7  | LOC374514 | <a href="#">XM 350908.1</a> |
| GI_37544698-S | 100.4  | 104.6  | 91.1   | MYR8      | <a href="#">XM 028522.3</a> |
| GI_37544714-S | 235.9  | 287    | 239.7  | LOC376220 | <a href="#">XM 352115.1</a> |
| GI_37544717-S | 102.2  | 86.6   | 91.2   | LOC121952 | <a href="#">XM 062872.3</a> |
| GI_37544742-S | 103.8  | 117.9  | 103.4  | LOC341604 | <a href="#">XM 296315.3</a> |
| GI_37544744-S | 92.2   | 105.9  | 104.6  | LOC122335 | <a href="#">XM 063084.2</a> |
| GI_37544774-S | 124.5  | 143.3  | 135.7  | LOC339253 | <a href="#">XM 290786.2</a> |
| GI_37544910-S | 253.4  | 327.6  | 265.7  | LOC376225 | <a href="#">XM 352118.1</a> |
| GI_37544934-S | 629.3  | 427.5  | 367.6  | LOC284942 | <a href="#">XM 209415.3</a> |
| GI_37544963-S | 457    | 528.6  | 508    | LOC374841 | <a href="#">XM 353161.1</a> |
| GI_37544988-S | 314.2  | 366.6  | 314.1  | LOC374843 | <a href="#">XM 351156.1</a> |
| GI_37544990-S | 373.2  | 352    | 330.2  | LOC374845 | <a href="#">XM 351157.1</a> |
| GI_37545002-S | 109.5  | 118    | 110.2  | LOC374851 | <a href="#">XM 353162.1</a> |
| GI_37545048-S | 132.9  | 199.3  | 154.6  | FLJ10312  | <a href="#">XM 352921.1</a> |

|               |         |        |       |            |                             |
|---------------|---------|--------|-------|------------|-----------------------------|
| GI_37545052-S | 85.6    | 86.8   | 100.7 | LOC374852  | <a href="#">XM 351159.1</a> |
| GI_37545056-S | 212.2   | 252.9  | 262   | LOC201475  | <a href="#">XM 113967.3</a> |
| GI_37545060-S | 1167.5  | 1024.9 | 606.3 | KIAA0802   | <a href="#">XM 031357.5</a> |
| GI_37545064-S | 95.6    | 102.5  | 95.4  | LOC374856  | <a href="#">XM 353163.1</a> |
| GI_37545066-S | 172     | 207.3  | 177   | LOC284232  | <a href="#">XM 209076.3</a> |
| GI_37545068-S | 136.9   | 188.8  | 151.1 | LOC374858  | <a href="#">XM 353164.1</a> |
| GI_37545070-S | 117     | 123.4  | 122.7 | LOC374860  | <a href="#">XM 351161.1</a> |
| GI_37545082-S | 103.3   | 92.1   | 105.1 | LOC376435  | <a href="#">XM 352224.1</a> |
| GI_37545084-S | 107.2   | 117.5  | 123.1 | LOC339291  | <a href="#">XM 292678.2</a> |
| GI_37545110-S | 99.5    | 100.7  | 90.4  | LOC342850  | <a href="#">XM 292717.3</a> |
| GI_37545112-S | 164.2   | 135.1  | 118   | Spir-1     | <a href="#">XM 290818.2</a> |
| GI_37545266-S | 193.4   | 206.4  | 226.4 | LOC374868  | <a href="#">XM 351168.1</a> |
| GI_37545268-S | 301.8   | 304.6  | 354.1 | LOC374869  | <a href="#">XM 353166.1</a> |
| GI_37545270-S | 174.2   | 217.9  | 207.2 | LOC374870  | <a href="#">XM 353167.1</a> |
| GI_37545279-S | 92.4    | 97.4   | 103.9 | LOC376473  | <a href="#">XM 352235.1</a> |
| GI_37545281-S | 80.8    | 78.2   | 86.1  | LOC147294  | <a href="#">XM 091727.7</a> |
| GI_37545349-S | 92.3    | 99.2   | 95.6  | LOC374489  | <a href="#">XM 350896.1</a> |
| GI_37545351-S | 13644.6 | 12032  | 10178 | LOC374490  | <a href="#">XM 350897.1</a> |
| GI_37545353-S | 111.4   | 123.8  | 107.2 | LOC374491  | <a href="#">XM 350898.1</a> |
| GI_37545358-S | 134.9   | 174.2  | 136.2 | LOC254109  | <a href="#">XM 172905.3</a> |
| GI_37545360-S | 131.1   | 137.3  | 150.3 | KIAA0774   | <a href="#">XM 166270.2</a> |
| GI_37545362-S | 101     | 122.7  | 105.2 | LOC374493  | <a href="#">XM 353043.1</a> |
| GI_37545368-S | 97.4    | 116.3  | 110.5 | LOC374495  | <a href="#">XM 350900.1</a> |
| GI_37545370-S | 99.2    | 105.1  | 111   | DKFZp686J0 | <a href="#">XM 292193.2</a> |
| GI_37545373-S | 534.2   | 573.7  | 463.8 | KIAA0564   | <a href="#">XM 038664.7</a> |
| GI_37545376-S | 355.4   | 381.7  | 306.4 | LOC253512  | <a href="#">XM 170736.3</a> |
| GI_37545377-S | 122     | 118.9  | 120.2 | LOC220416  | <a href="#">XM 166971.3</a> |
| GI_37545383-S | 193.8   | 198.2  | 189.6 | LOC374496  | <a href="#">XM 350901.1</a> |
| GI_37545408-S | 132.9   | 145.1  | 129.3 | LOC374497  | <a href="#">XM 353044.1</a> |
| GI_37545414-S | 102.9   | 110.9  | 106.5 | LOC341676  | <a href="#">XM 292160.3</a> |
| GI_37545449-S | 92.3    | 86.1   | 104.2 | LOC374504  | <a href="#">XM 353045.1</a> |
| GI_37545451-S | 102.2   | 104.4  | 99.2  | LOC374505  | <a href="#">XM 353046.1</a> |
| GI_37545455-S | 136.2   | 165.6  | 134.9 | LOC374508  | <a href="#">XM 353047.1</a> |
| GI_37545457-S | 115.4   | 129.9  | 115.3 | LOC374509  | <a href="#">XM 353048.1</a> |
| GI_37545459-S | 125     | 117.4  | 137.8 | AK000009   | <a href="#">XM 085023.5</a> |
| GI_37545463-S | 118.1   | 119.8  | 100.9 | LOC374510  | <a href="#">XM 353049.1</a> |
| GI_37545486-S | 133.6   | 140.8  | 123.3 | LOC376171  | <a href="#">XM 352101.1</a> |
| GI_37545498-S | 145.7   | 145.3  | 154.9 | LOC376174  | <a href="#">XM 352104.1</a> |
| GI_37545504-S | 120.5   | 110.9  | 94.7  | LOC376183  | <a href="#">XM 352105.1</a> |
| GI_37545508-S | 101.7   | 125.1  | 119   | LOC376191  | <a href="#">XM 352106.1</a> |
| GI_37545524-S | 118.1   | 126.1  | 109.1 | LOC341651  | <a href="#">XM 292197.3</a> |
| GI_37545530-S | 120.9   | 128.8  | 113.8 | LOC283514  | <a href="#">XM 210264.3</a> |
| GI_37545556-S | 184.5   | 244.7  | 224.9 | LOC121981  | <a href="#">XM 062890.2</a> |
| GI_37545558-S | 139.2   | 177.2  | 146.8 | LOC376201  | <a href="#">XM 352109.1</a> |



|               |        |        |        |             |                             |
|---------------|--------|--------|--------|-------------|-----------------------------|
| GI_37545568-S | 95.6   | 90.6   | 81.6   | LOC122134   | <a href="#">XM 062966.2</a> |
| GI_37545572-S | 121.7  | 113.6  | 122.1  | LOC341720   | <a href="#">XM 292184.2</a> |
| GI_37545574-S | 118.1  | 137.4  | 124.5  | LOC376210   | <a href="#">XM 352112.1</a> |
| GI_37545578-S | 491    | 637.4  | 589.1  | NDFIP2      | <a href="#">XM 041162.3</a> |
| GI_37545580-S | 88.2   | 87.3   | 88.4   | KIAA1910    | <a href="#">XM 055514.2</a> |
| GI_37545618-S | 2164.3 | 2396   | 1615.8 | KIAA1695    | <a href="#">XM 352922.1</a> |
| GI_37545625-S | 256.7  | 156.7  | 163.5  | TAF4B       | <a href="#">XM 290809.2</a> |
| GI_37545631-S | 109.5  | 127.8  | 110    | LOC374864   | <a href="#">XM 351164.1</a> |
| GI_37545635-S | 148.7  | 156.3  | 145.6  | LOC147354   | <a href="#">XM 085777.2</a> |
| GI_37545637-S | 94     | 96.9   | 85.4   | KIAA1713    | <a href="#">XM 290811.2</a> |
| GI_37545641-S | 142.6  | 136.5  | 120.2  | LOC374865   | <a href="#">XM 353165.1</a> |
| GI_37545645-S | 123.1  | 122.4  | 117.6  | LOC284260   | <a href="#">XM 211408.2</a> |
| GI_37545679-S | 248.6  | 267.9  | 236.7  | KIAA1632    | <a href="#">XM 038864.4</a> |
| GI_37545685-S | 119.5  | 138.9  | 138.5  | LOC201501   | <a href="#">XM 113971.2</a> |
| GI_37545687-S | 127.2  | 133    | 103.1  | MYO5B       | <a href="#">XM 351166.1</a> |
| GI_37545693-S | 212.8  | 242.9  | 230.1  | LOC147468   | <a href="#">XM 091809.2</a> |
| GI_37545699-S | 174    | 193    | 166.3  | LOC376453   | <a href="#">XM 352228.1</a> |
| GI_37545842-S | 119    | 148.2  | 150.9  | ATP11A      | <a href="#">XM 085028.3</a> |
| GI_37545846-S | 96.7   | 111.1  | 92.9   | LOC376222   | <a href="#">XM 352116.1</a> |
| GI_37545854-S | 82.9   | 85.7   | 78     | LOC125595   | <a href="#">XM 064689.5</a> |
| GI_37545856-S | 128.7  | 146    | 113.6  | LOC376469   | <a href="#">XM 352232.1</a> |
| GI_37545859-S | 307    | 290.9  | 209.8  | LOC374516   | <a href="#">XM 353055.1</a> |
| GI_37545861-S | 93.7   | 100.2  | 105.5  | LOC376224   | <a href="#">XM 352117.1</a> |
| GI_37545866-S | 118.1  | 109.4  | 114    | LOC374867   | <a href="#">XM 351167.1</a> |
| GI_37545870-S | 672.5  | 731.5  | 634.2  | LOC125704   | <a href="#">XM 058931.6</a> |
| GI_37545871-S | 150.5  | 160.4  | 149.7  | LOC376464   | <a href="#">XM 352229.1</a> |
| GI_37545877-S | 105.9  | 100.5  | 98.4   | LOC342784   | <a href="#">XM 292707.2</a> |
| GI_37545889-S | 100.6  | 113.7  | 101.6  | LOC374521   | <a href="#">XM 353056.1</a> |
| GI_37545891-S | 2057.8 | 1386.2 | 1474.1 | DKFZP564OC  | <a href="#">XM 033371.3</a> |
| GI_37545893-S | 98.1   | 98     | 98.1   | ZFHX2       | <a href="#">XM 033370.9</a> |
| GI_37545897-S | 119.2  | 121.7  | 115.8  | LOC374540   | <a href="#">XM 353058.1</a> |
| GI_37545901-S | 108.7  | 100.5  | 109.4  | LOC374542   | <a href="#">XM 350929.1</a> |
| GI_37545907-S | 281.6  | 357.3  | 304.7  | LOC374543   | <a href="#">XM 353060.1</a> |
| GI_37545909-S | 228.8  | 265.1  | 224    | LOC374544   | <a href="#">XM 350930.1</a> |
| GI_37545911-S | 393.9  | 463.7  | 432.2  | DKFZP434117 | <a href="#">XM 113763.4</a> |
| GI_37545913-S | 365.8  | 430    | 389.9  | LOC374545   | <a href="#">XM 350931.1</a> |
| GI_37545915-S | 109.1  | 91.3   | 103.7  | LOC374546   | <a href="#">XM 353061.1</a> |
| GI_37545917-S | 96.1   | 114.6  | 104.2  | LOC374547   | <a href="#">XM 353062.1</a> |
| GI_37545919-S | 194.5  | 247.4  | 209.5  | LOC374548   | <a href="#">XM 353063.1</a> |
| GI_37545925-S | 100    | 98.8   | 92.2   | LOC253970   | <a href="#">XM 172910.3</a> |
| GI_37545927-S | 123.6  | 122.9  | 118.8  | C14orf25    | <a href="#">XM 350932.1</a> |
| GI_37545931-S | 220.3  | 201.1  | 178.4  | C14orf28    | <a href="#">XM 071793.5</a> |
| GI_37545932-S | 90.5   | 100.2  | 93.3   | KIAA1596    | <a href="#">XM 048128.7</a> |
| GI_37545936-S | 220    | 253.7  | 234.9  | KIAA1344    | <a href="#">XM 051699.3</a> |

|               |        |        |        |            |                              |           |       |
|---------------|--------|--------|--------|------------|------------------------------|-----------|-------|
| GI_37545938-S | 92.9   | 95.1   | 94.5   | DKFZp762F0 | <a href="#">XM 290615.2</a>  |           |       |
| GI_37545942-S | 127.4  | 170.2  | 139    | DDHD1      | <a href="#">XM 051692.3</a>  | metal ion | lipid |
| GI_37545946-S | 127.5  | 130.5  | 129.6  | LOC145414  | <a href="#">XM 085138.3</a>  |           |       |
| GI_37545948-S | 111.2  | 97.6   | 104    | LOC341880  | <a href="#">XM 292260.2</a>  |           |       |
| GI_37545950-S | 141.4  | 170.4  | 169.6  | LOC374553  | <a href="#">XM 353066.1</a>  |           |       |
| GI_37545954-S | 101.4  | 119    | 109.4  | KIAA0227   | <a href="#">XM 027236.2</a>  |           |       |
| GI_37545956-S | 136.7  | 275.2  | 413.1  | MAP3K9     | <a href="#">XM 027237.6</a>  |           |       |
| GI_37545958-S | 571.3  | 855.6  | 765.8  | S164       | <a href="#">XM 027330.11</a> |           |       |
| GI_37545960-S | 89.7   | 95     | 92.9   | C14orf42   | <a href="#">XM 090885.3</a>  |           |       |
| GI_37545966-S | 1145.8 | 1070.7 | 1044.5 | ZAP3       | <a href="#">XM 085151.7</a>  |           |       |
| GI_37545970-S | 133.5  | 130.4  | 123.1  | DKFZP434P0 | <a href="#">XM 041116.5</a>  |           |       |
| GI_37545972-S | 98.2   | 105    | 93.3   | LOC283578  | <a href="#">XM 208746.2</a>  |           |       |
| GI_37545976-S | 130.2  | 135.4  | 135.3  | LOC374557  | <a href="#">XM 353068.1</a>  |           |       |
| GI_37545978-S | 84.6   | 88     | 87.4   | LOC374558  | <a href="#">XM 353069.1</a>  |           |       |
| GI_37545980-S | 647.2  | 491.7  | 427.6  | TTC7L1     | <a href="#">XM 085175.3</a>  |           |       |
| GI_37545982-S | 464.4  | 363.2  | 228.3  | KIAA1509   | <a href="#">XM 029353.2</a>  |           |       |
| GI_37545986-S | 1306.6 | 940.1  | 1263.5 | C14orf109  | <a href="#">XM 058628.5</a>  |           |       |
| GI_37545987-S | 83.8   | 99     | 84.5   | LOC374561  | <a href="#">XM 350939.1</a>  |           |       |
| GI_37545989-S | 93     | 96.5   | 96.4   | KIAA1409   | <a href="#">XM 028395.2</a>  | FLJ43337  |       |
| GI_37545993-S | 119.8  | 128.9  | 118.6  | LOC256394  | <a href="#">XM 170754.3</a>  |           |       |
| GI_37545995-S | 113.2  | 142.2  | 118.3  | LOC374564  | <a href="#">XM 353071.1</a>  |           |       |
| GI_37545997-S | 135    | 155.3  | 137.8  | LOC374565  | <a href="#">XM 353072.1</a>  |           |       |
| GI_37545999-S | 188.3  | 239.5  | 198.7  | C14orf68   | <a href="#">XM 208731.2</a>  |           |       |
| GI_37546002-S | 94.9   | 92.5   | 91.9   | LOC374566  | <a href="#">XM 353073.1</a>  |           |       |
| GI_37546004-S | 160.4  | 158.4  | 135.6  | LOC374567  | <a href="#">XM 353074.1</a>  |           |       |
| GI_37546007-S | 146    | 172    | 166.4  | LOC283604  | <a href="#">XM 211088.2</a>  |           |       |
| GI_37546008-S | 111.9  | 131.3  | 118.9  | C14orf73   | <a href="#">XM 040910.4</a>  |           |       |
| GI_37546012-S | 229.6  | 283.6  | 247.2  | LOC374569  | <a href="#">XM 350943.1</a>  |           |       |
| GI_37546014-S | 121.8  | 115.7  | 108.8  | KIF26A     | <a href="#">XM 050278.7</a>  |           |       |
| GI_37546018-S | 1698.6 | 1760.6 | 2073.8 | KIAA0284   | <a href="#">XM 208766.2</a>  |           |       |
| GI_37546020-S | 300.4  | 304.4  | 341.2  | LOC374571  | <a href="#">XM 350945.1</a>  |           |       |
| GI_37546022-S | 169.9  | 176.2  | 207.2  | C14orf78   | <a href="#">XM 290629.2</a>  |           |       |
| GI_37546026-S | 99.8   | 126.2  | 93.3   | LOC374572  | <a href="#">XM 350946.1</a>  |           |       |
| GI_37546028-S | 122.3  | 135    | 120.5  | LOC374573  | <a href="#">XM 350947.1</a>  |           |       |
| GI_37546036-S | 106.5  | 127.8  | 102.3  | LOC376226  | <a href="#">XM 352119.1</a>  |           |       |
| GI_37546040-S | 109.5  | 124.3  | 102.8  | LOC283621  | <a href="#">XM 210282.3</a>  |           |       |
| GI_37546044-S | 135.8  | 154.6  | 132.5  | LOC122740  | <a href="#">XM 063308.3</a>  |           |       |
| GI_37546046-S | 135.4  | 138.1  | 129.4  | LOC122748  | <a href="#">XM 063315.2</a>  |           |       |
| GI_37546048-S | 104.7  | 113.5  | 110.6  | LOC123103  | <a href="#">XM 063481.2</a>  |           |       |
| GI_37546050-S | 103.7  | 118.9  | 93.7   | LOC338879  | <a href="#">XM 292225.2</a>  |           |       |
| GI_37546052-S | 94.6   | 98.7   | 94.1   | LOC376227  | <a href="#">XM 352120.1</a>  |           |       |
| GI_37546054-S | 145.4  | 163.6  | 146.3  | LOC341799  | <a href="#">XM 292227.2</a>  |           |       |
| GI_37546056-S | 192.7  | 227    | 203.6  | LOC376229  | <a href="#">XM 352121.1</a>  |           |       |
| GI_37546058-S | 137.1  | 154.2  | 129.3  | LOC122706  | <a href="#">XM 063287.6</a>  |           |       |

|               |       |       |       |           |                             |          |
|---------------|-------|-------|-------|-----------|-----------------------------|----------|
| GI_37546066-S | 120.8 | 133.4 | 126.4 | LOC376247 | <a href="#">XM 352133.1</a> |          |
| GI_37546086-S | 137.4 | 158.2 | 147.1 | LOC376263 | <a href="#">XM 352136.1</a> |          |
| GI_37546090-S | 122.4 | 127   | 129.7 | KIAA0599  | <a href="#">XM 085127.7</a> |          |
| GI_37546094-S | 150.5 | 162.1 | 153.2 | LOC122438 | <a href="#">XM 063138.2</a> |          |
| GI_37546100-S | 121.8 | 137.7 | 119.4 | LOC341912 | <a href="#">XM 292301.2</a> |          |
| GI_37546102-S | 181.7 | 239.4 | 203.4 | LOC376279 | <a href="#">XM 352142.1</a> |          |
| GI_37546110-S | 120.1 | 141.7 | 113.8 | LOC376283 | <a href="#">XM 352144.1</a> |          |
| GI_37546112-S | 100.9 | 116.7 | 103.7 | LOC122423 | <a href="#">XM 063123.4</a> |          |
| GI_37546114-S | 138.6 | 156.1 | 138.5 | LOC376284 | <a href="#">XM 352145.1</a> |          |
| GI_37546116-S | 94.5  | 102.8 | 97.4  | LOC376285 | <a href="#">XM 352146.1</a> |          |
| GI_37546131-S | 84.5  | 84.1  | 81.6  | LOC375805 | <a href="#">XM 351892.1</a> |          |
| GI_37546137-S | 120.3 | 147   | 136.8 | PPP1R3F   | <a href="#">XM 351895.1</a> |          |
| GI_37546139-S | 113.8 | 129.3 | 98.5  | LOC286408 | <a href="#">XM 210035.2</a> |          |
| GI_37546148-S | 113.9 | 135   | 125.7 | LOC377882 | <a href="#">XM 352833.1</a> |          |
| GI_37546152-S | 108.7 | 117.5 | 112.6 | LOC347344 | <a href="#">XM 293284.2</a> |          |
| GI_37546154-S | 107   | 111.5 | 108.1 | ZNF21     | <a href="#">XM 092995.3</a> |          |
| GI_37546156-S | 121.5 | 125.5 | 110.4 | LOC377886 | <a href="#">XM 352834.1</a> |          |
| GI_37546160-S | 371.7 | 412   | 356.2 | LOC377887 | <a href="#">XM 352835.1</a> |          |
| GI_37546163-S | 120.9 | 124.1 | 120.5 | LOC375807 | <a href="#">XM 353505.1</a> |          |
| GI_37546165-S | 179.8 | 238.4 | 208.9 | KIAA0522  | <a href="#">XM 291345.2</a> |          |
| GI_37546167-S | 148   | 147.4 | 155   | LOC375808 | <a href="#">XM 351905.1</a> |          |
| GI_37546173-S | 173.7 | 204.1 | 192.3 | LOC375809 | <a href="#">XM 351906.1</a> |          |
| GI_37546177-S | 99    | 118   | 110.5 | LOC375811 | <a href="#">XM 353506.1</a> |          |
| GI_37546183-S | 89.6  | 90.5  | 82.5  | LOC377893 | <a href="#">XM 352840.1</a> |          |
| GI_37546189-S | 95    | 102.3 | 91.3  | LOC377895 | <a href="#">XM 352841.1</a> |          |
| GI_37546196-S | 146.9 | 189.6 | 164   | LOC139189 | <a href="#">XM 066534.2</a> |          |
| GI_37546200-S | 164.9 | 214   | 183.3 | LOC377888 | <a href="#">XM 352836.1</a> |          |
| GI_37546202-S | 130.4 | 137.3 | 115.9 | LOC377889 | <a href="#">XM 352837.1</a> |          |
| GI_37546204-S | 117.1 | 136.8 | 130   | LOC340602 | <a href="#">XM 291352.2</a> | MGC47837 |
| GI_37546205-S | 99.6  | 105.3 | 87.9  | LOC347549 | <a href="#">XM 293416.2</a> |          |
| GI_37546214-S | 404.6 | 523.6 | 447   | CYLC1     | <a href="#">XM 088636.4</a> |          |
| GI_37546216-S | 178.3 | 201   | 187.1 | LOC340562 | <a href="#">XM 291339.2</a> |          |
| GI_37546220-S | 100.5 | 129   | 118.8 | PCDH19    | <a href="#">XM 033173.7</a> |          |
| GI_37546222-S | 111.9 | 108.9 | 125.6 | LOC375818 | <a href="#">XM 351913.1</a> |          |
| GI_37546224-S | 112.7 | 111.3 | 107.3 | LOC375819 | <a href="#">XM 353510.1</a> |          |
| GI_37546226-S | 91.6  | 92.8  | 94.9  | KIAA1789  | <a href="#">XM 040486.3</a> |          |
| GI_37546229-S | 126.9 | 141.4 | 127.8 | FLJ10097  | <a href="#">XM 043653.6</a> |          |
| GI_37546231-S | 94.2  | 108.9 | 103.3 | LOC158983 | <a href="#">XM 088735.3</a> |          |
| GI_37546232-S | 104.2 | 109.7 | 119.6 | LOC286436 | <a href="#">XM 210048.2</a> |          |
| GI_37546234-S | 132.8 | 144.8 | 105.9 | LOC139231 | <a href="#">XM 060020.5</a> |          |
| GI_37546237-S | 132.1 | 166.4 | 164.8 | LOC92129  | <a href="#">XM 351915.1</a> |          |
| GI_37546245-S | 196.8 | 219.8 | 201.6 | LOC139302 | <a href="#">XM 066621.3</a> |          |
| GI_37546249-S | 166.3 | 216.1 | 188.4 | LOC286453 | <a href="#">XM 210054.2</a> |          |
| GI_37546258-S | 163.8 | 154.5 | 133.1 | LOC347393 | <a href="#">XM 293320.3</a> |          |

|               |        |        |        |           |                             |     |           |                         |
|---------------|--------|--------|--------|-----------|-----------------------------|-----|-----------|-------------------------|
| GI_37546264-S | 122.1  | 128.9  | 127.9  | KIAA1817  | <a href="#">XM_042978.2</a> |     |           |                         |
| GI_37546267-S | 248.6  | 283    | 264.3  | LOC158835 | <a href="#">XM_088683.2</a> |     |           |                         |
| GI_37546271-S | 89     | 86.5   | 73.7   | LOC158833 | <a href="#">XM_088691.3</a> |     |           |                         |
| GI_37546273-S | 315.9  | 414.9  | 342.7  | LOC347517 | <a href="#">XM_293398.2</a> |     |           |                         |
| GI_37546275-S | 164.4  | 182.9  | 163.5  | LOC158825 | <a href="#">XM_088686.4</a> |     |           |                         |
| GI_37546288-S | 95.3   | 101.7  | 99.2   | LOC139886 | <a href="#">XM_066946.3</a> |     |           |                         |
| GI_37546291-S | 227.5  | 196.4  | 204.4  | LOC286449 | <a href="#">XM_212321.2</a> |     |           |                         |
| GI_37546293-S | 116.3  | 124.3  | 123.7  | LOC340554 | <a href="#">XM_293334.2</a> |     |           |                         |
| GI_37546299-S | 115.2  | 119.4  | 95.3   | LOC377909 | <a href="#">XM_352843.1</a> |     |           |                         |
| GI_37546303-S | 105.3  | 112.5  | 102.1  | LOC377911 | <a href="#">XM_352844.1</a> |     |           |                         |
| GI_37546305-S | 130.5  | 119.9  | 114.9  | LOC139562 | <a href="#">XM_066765.3</a> |     |           |                         |
| GI_37546306-S | 212.5  | 263    | 253.9  | LOC377913 | <a href="#">XM_352845.1</a> |     |           |                         |
| GI_37546309-S | 171.9  | 208.7  | 174.5  | KIAA2001  | <a href="#">XM_291322.2</a> |     |           |                         |
| GI_37546313-S | 122.2  | 130.7  | 108.4  | LOC340529 | <a href="#">XM_291328.2</a> |     |           |                         |
| GI_37546317-S | 378.6  | 390.8  | 272.4  | LOC377917 | <a href="#">XM_352848.1</a> |     |           |                         |
| GI_37546335-S | 1375.7 | 1118.5 | 1124.8 | LOC375833 | <a href="#">XM_351929.1</a> |     |           |                         |
| GI_37546337-S | 3305.4 | 3254.5 | 3194.3 | LOC375834 | <a href="#">XM_351930.1</a> |     |           |                         |
| GI_37546339-S | 119.7  | 117.6  | 107.8  | ZNF275    | <a href="#">XM_351933.1</a> |     |           |                         |
| GI_37546343-S | 176.6  | 188.5  | 172.5  | LOC139046 | <a href="#">XM_066443.5</a> |     |           |                         |
| GI_37546350-S | 581.7  | 858.3  | 714.1  | DXS1283E  | <a href="#">XM_047871.6</a> | GS2 | catalytic | cellular_co biological_ |
| GI_37546356-S | 106    | 102.4  | 113.3  | LOC375796 | <a href="#">XM_351887.1</a> |     |           |                         |
| GI_37546360-S | 71.4   | 81.9   | 81.4   | LOC375797 | <a href="#">XM_353502.1</a> |     |           |                         |
| GI_37546364-S | 316.2  | 294.1  | 339.4  | LOC220895 | <a href="#">XM_165534.4</a> |     |           |                         |
| GI_37546368-S | 112.6  | 120.5  | 110.8  | LOC139420 | <a href="#">XM_066685.3</a> |     |           |                         |
| GI_37546372-S | 97.2   | 100.6  | 98.9   | LOC377856 | <a href="#">XM_352829.1</a> |     |           |                         |
| GI_37546376-S | 87.1   | 85.3   | 78.4   | LOC92552  | <a href="#">XM_045705.5</a> |     |           |                         |
| GI_37546381-S | 109.6  | 109.3  | 113.4  | KIAA1677  | <a href="#">XM_040383.6</a> |     |           |                         |
| GI_37546382-S | 142.7  | 160.9  | 159.5  | LOC347438 | <a href="#">XM_293352.3</a> |     |           |                         |
| GI_37546384-S | 108.8  | 125.2  | 122.4  | LOC170067 | <a href="#">XM_093087.3</a> |     |           |                         |
| GI_37546389-S | 102.2  | 100.2  | 97.4   | LOC347541 | <a href="#">XM_293407.2</a> |     |           |                         |
| GI_37546394-S | 131.5  | 132.7  | 131.5  | LOC347442 | <a href="#">XM_293354.3</a> |     |           |                         |
| GI_37546396-S | 82.2   | 83.6   | 90     | LOC139425 | <a href="#">XM_066690.3</a> |     |           |                         |
| GI_37546398-S | 123.4  | 132.7  | 114.7  | LOC139431 | <a href="#">XM_066695.3</a> |     |           |                         |
| GI_37546400-S | 350.6  | 433.5  | 397.4  | LOC377862 | <a href="#">XM_352830.1</a> |     |           |                         |
| GI_37546402-S | 98.9   | 98.8   | 99.4   | LOC340571 | <a href="#">XM_293360.3</a> |     |           |                         |
| GI_37546411-S | 94.9   | 91.3   | 88.3   | FLJ12649  | <a href="#">XM_291344.2</a> |     |           |                         |
| GI_37546413-S | 119    | 148.3  | 130.1  | LOC375825 | <a href="#">XM_353512.1</a> |     |           |                         |
| GI_37546415-S | 120.5  | 109.6  | 112.5  | LOC375826 | <a href="#">XM_351923.1</a> |     |           |                         |
| GI_37546417-S | 112.2  | 117.9  | 113.5  | LOC347487 | <a href="#">XM_298053.2</a> |     |           |                         |
| GI_37546419-S | 94.4   | 109.2  | 98.5   | LOC375828 | <a href="#">XM_353513.1</a> |     |           |                         |
| GI_37546429-S | 99.1   | 93.5   | 87.9   | LOC377963 | <a href="#">XM_352861.1</a> |     |           |                         |
| GI_37546435-S | 99.5   | 101.9  | 102.2  | LOC347468 | <a href="#">XM_293366.3</a> |     |           |                         |
| GI_37546437-S | 104.3  | 120.5  | 94.5   | LOC347475 | <a href="#">XM_298045.2</a> |     |           |                         |
| GI_37546442-S | 349.2  | 539.9  | 424.8  | LOC377970 | <a href="#">XM_352863.1</a> |     |           |                         |

|               |        |        |        |           |                             |
|---------------|--------|--------|--------|-----------|-----------------------------|
| GI_37546444-S | 86.8   | 89     | 76.1   | LOC377972 | <a href="#">XM 352864.1</a> |
| GI_37546449-S | 103.3  | 105    | 94     | LOC377975 | <a href="#">XM 352865.1</a> |
| GI_37546456-S | 350.3  | 353.3  | 295.4  | LOC375832 | <a href="#">XM 351927.1</a> |
| GI_37546461-S | 143.2  | 169.6  | 154.6  | LOC347527 | <a href="#">XM 293401.2</a> |
| GI_37546464-S | 178.6  | 219.9  | 191.7  | H2AFB     | <a href="#">XM 352873.1</a> |
| GI_37546471-S | 122.3  | 144.1  | 126.6  | LOC203510 | <a href="#">XM 115897.2</a> |
| GI_37546474-S | 173    | 221.4  | 195.5  | LOC375835 | <a href="#">XM 351934.1</a> |
| GI_37546480-S | 127.1  | 134.4  | 117.9  | LOC377980 | <a href="#">XM 352869.1</a> |
| GI_37546482-S | 105.6  | 124.6  | 114.6  | LOC139735 | <a href="#">XM 066859.2</a> |
| GI_37546496-S | 776.8  | 809.6  | 607.8  | LOC286528 | <a href="#">XM 210501.3</a> |
| GI_37546507-S | 99.4   | 95.7   | 94.9   | LOC255766 | <a href="#">XM 172794.2</a> |
| GI_37546509-S | 107.5  | 122.4  | 101.8  | KIAA1210  | <a href="#">XM 172801.2</a> |
| GI_37546511-S | 102.6  | 113.3  | 92.9   | LOC158796 | <a href="#">XM 088677.2</a> |
| GI_37546515-S | 521.3  | 690.6  | 538.7  | THOC2     | <a href="#">XM 047325.6</a> |
| GI_37546517-S | 120.3  | 130    | 112.5  | LOC375822 | <a href="#">XM 351919.1</a> |
| GI_37546519-S | 276.1  | 332.9  | 324.4  | LOC377950 | <a href="#">XM 352856.1</a> |
| GI_37546521-S | 255.7  | 291    | 294.1  | LOC377952 | <a href="#">XM 352857.1</a> |
| GI_37546529-S | 137    | 161    | 154.8  | LOC377955 | <a href="#">XM 352858.1</a> |
| GI_37546535-S | 1065.8 | 1839.5 | 2286.2 | LOC377960 | <a href="#">XM 352860.1</a> |
| GI_37546538-S | 127.3  | 115    | 117.4  | LOC375836 | <a href="#">XM 351938.1</a> |
| GI_37546550-S | 103.9  | 107.6  | 100    | LOC338829 | <a href="#">XM 292122.3</a> |
| GI_37546554-S | 104.5  | 110.5  | 112.5  | LOC377990 | <a href="#">XM 352876.1</a> |
| GI_37546557-S | 125.2  | 121.4  | 114    | LOC377991 | <a href="#">XM 352877.1</a> |
| GI_37546565-S | 91.3   | 107.3  | 90.1   | LOC375800 | <a href="#">XM 353504.1</a> |
| GI_37546575-S | 106.9  | 116.9  | 101.3  | HYPM      | <a href="#">XM 048235.2</a> |
| GI_37546580-S | 122.4  | 118    | 112.8  | LOC347411 | <a href="#">XM 293325.2</a> |
| GI_37546582-S | 136.9  | 156.9  | 144.6  | LOC377870 | <a href="#">XM 352832.1</a> |
| GI_37546588-S | 104.9  | 122.9  | 102.1  | LOC375817 | <a href="#">XM 351912.1</a> |
| GI_37546613-S | 116    | 131    | 106.6  | LOC375847 | <a href="#">XM 353522.1</a> |
| GI_37546619-S | 262.2  | 311.4  | 256.7  | CYorf15A  | <a href="#">XM 351950.1</a> |
| GI_37546626-S | 94.9   | 90.8   | 97.2   | LOC375845 | <a href="#">XM 351948.1</a> |
| GI_37546632-S | 93.7   | 95.7   | 101.5  | LOC286561 | <a href="#">XM 210515.2</a> |
| GI_37546637-S | 254.7  | 294.8  | 265.1  | LOC375843 | <a href="#">XM 293449.2</a> |
| GI_37546639-S | 113.1  | 112.5  | 106.8  | LOC375844 | <a href="#">XM 351945.1</a> |
| GI_37546649-S | 99.8   | 117.9  | 104.1  | LOC347596 | <a href="#">XM 293460.3</a> |
| GI_37546653-S | 105.5  | 120.5  | 111.2  | LOC140103 | <a href="#">XM 067076.2</a> |
| GI_37546658-S | 103.7  | 115.6  | 111.9  | LOC375849 | <a href="#">XM 351954.1</a> |
| GI_37546662-S | 188.1  | 276.6  | 214.7  | LOC375851 | <a href="#">XM 353524.1</a> |
| GI_37546668-S | 80.5   | 76.1   | 80.6   | LOC159184 | <a href="#">XM 010658.8</a> |
| GI_37546705-S | 400.1  | 482.5  | 305.6  | LOC375786 | <a href="#">XM 353496.1</a> |
| GI_37546711-S | 115    | 129.8  | 124.8  | LOC375787 | <a href="#">XM 353497.1</a> |
| GI_37546713-S | 77.7   | 79.4   | 78     | LOC377850 | <a href="#">XM 352825.1</a> |
| GI_37546716-S | 165.6  | 139.6  | 126.2  | LOC375788 | <a href="#">XM 351882.1</a> |
| GI_37546720-S | 96.2   | 95.6   | 99.2   | LOC377851 | <a href="#">XM 352826.1</a> |

|               |        |        |        |           |                             |                   |         |
|---------------|--------|--------|--------|-----------|-----------------------------|-------------------|---------|
| GI_37546726-S | 85.6   | 92.6   | 96.3   | KIAA1751  | <a href="#">XM_351884.1</a> |                   |         |
| GI_37546728-S | 135.3  | 148.4  | 152    | LOC339457 | <a href="#">XM_353498.1</a> |                   |         |
| GI_37546731-S | 2425.3 | 3056.7 | 3438.4 | LOC375790 | <a href="#">XM_351885.1</a> |                   |         |
| GI_37546739-S | 124.4  | 112.2  | 110.5  | KIAA1107  | <a href="#">XM_034086.3</a> |                   |         |
| GI_37546741-S | 134.7  | 175.6  | 162.9  | LOC374993 | <a href="#">XM_351272.1</a> |                   |         |
| GI_37546745-S | 127.2  | 129.7  | 112.9  | LOC374994 | <a href="#">XM_353208.1</a> |                   |         |
| GI_37546747-S | 100.3  | 94.4   | 90.4   | LOC374995 | <a href="#">XM_353209.1</a> |                   |         |
| GI_37546761-S | 236.8  | 284.1  | 238.7  | LOC126598 | <a href="#">XM_060087.8</a> |                   |         |
| GI_37546763-S | 103.2  | 130    | 119.6  | LOC376619 | <a href="#">XM_352309.1</a> |                   |         |
| GI_37546765-S | 89.6   | 82.8   | 79.2   | LOC163404 | <a href="#">XM_088864.4</a> |                   |         |
| GI_37546767-S | 86.3   | 82.1   | 89     | LOC376622 | <a href="#">XM_352310.1</a> |                   |         |
| GI_37546772-S | 91.1   | 101.7  | 106.9  | LOC374997 | <a href="#">XM_353210.1</a> |                   |         |
| GI_37546774-S | 84.6   | 98.3   | 96.5   | FLJ25070  | <a href="#">XM_351275.1</a> | FLJ20008;KIAA1839 | nucleic |
| GI_37546776-S | 160.7  | 180.6  | 156.1  | LOC126987 | <a href="#">XM_060278.3</a> |                   |         |
| GI_37546785-S | 168.3  | 184.6  | 162.3  | CROCC     | <a href="#">XM_351240.1</a> |                   |         |
| GI_37546787-S | 128.6  | 127.2  | 122.4  | LOC376576 | <a href="#">XM_352295.1</a> |                   |         |
| GI_37546790-S | 109.7  | 122.7  | 116.2  | LOC343169 | <a href="#">XM_291435.2</a> |                   |         |
| GI_37546792-S | 107.1  | 134.6  | 116.9  | LOC376737 | <a href="#">XM_352351.1</a> |                   |         |
| GI_37546794-S | 112.8  | 122.3  | 121.3  | LOC127614 | <a href="#">XM_060569.2</a> |                   |         |
| GI_37546796-S | 203.1  | 216.7  | 188.4  | LOC284535 | <a href="#">XM_210122.3</a> |                   |         |
| GI_37546798-S | 112.3  | 121.3  | 120.9  | LOC127608 | <a href="#">XM_060563.7</a> |                   |         |
| GI_37546804-S | 88.4   | 112    | 85.7   | LOC376739 | <a href="#">XM_352352.1</a> |                   |         |
| GI_37546808-S | 97.1   | 98.2   | 90.1   | OR2T1     | <a href="#">XM_060316.3</a> |                   |         |
| GI_37546816-S | 209.1  | 210.6  | 181.4  | LOC375024 | <a href="#">XM_353218.1</a> |                   |         |
| GI_37546818-S | 98.8   | 105.5  | 104.5  | LOC199882 | <a href="#">XM_114047.2</a> |                   |         |
| GI_37546822-S | 149.3  | 174.2  | 185.5  | LOC375025 | <a href="#">XM_351295.1</a> |                   |         |
| GI_37546824-S | 109.3  | 118.1  | 101.8  | FLJ36032  | <a href="#">XM_351296.1</a> |                   |         |
| GI_37546828-S | 107.3  | 99.8   | 98.8   | LOC375026 | <a href="#">XM_351297.1</a> |                   |         |
| GI_37546836-S | 101.1  | 106.8  | 98.3   | LOC126637 | <a href="#">XM_060104.4</a> |                   |         |
| GI_37546837-S | 91.5   | 107.6  | 94.9   | LOC376659 | <a href="#">XM_352326.1</a> |                   |         |
| GI_37546846-S | 244.7  | 315.7  | 302.9  | KIAA1240  | <a href="#">XM_039676.4</a> |                   |         |
| GI_37546848-S | 107.2  | 100.9  | 95.2   | LOC375188 | <a href="#">XM_351422.1</a> |                   |         |
| GI_37546854-S | 111.9  | 116.7  | 101.5  | LOC375191 | <a href="#">XM_353278.1</a> |                   |         |
| GI_37546856-S | 98.4   | 104.3  | 101.3  | KIAA0953  | <a href="#">XM_039733.3</a> |                   |         |
| GI_37546860-S | 138.2  | 138.3  | 129.4  | LOC375193 | <a href="#">XM_351426.1</a> |                   |         |
| GI_37546862-S | 100.2  | 97.2   | 97.3   | LOC130106 | <a href="#">XM_059399.3</a> |                   |         |
| GI_37546863-S | 381    | 352.4  | 335.7  | SLB       | <a href="#">XM_114272.2</a> |                   |         |
| GI_37546867-S | 2342.6 | 1814.3 | 1388.5 | KIAA0007  | <a href="#">XM_087089.3</a> |                   |         |
| GI_37546881-S | 241.7  | 281.8  | 256.6  | KIAA1414  | <a href="#">XM_042685.3</a> |                   |         |
| GI_37546886-S | 116.9  | 154.8  | 120.8  | LOC344387 | <a href="#">XM_293029.2</a> |                   |         |
| GI_37546888-S | 114    | 118.3  | 100.3  | LOC375197 | <a href="#">XM_351431.1</a> |                   |         |
| GI_37546892-S | 143.7  | 163.3  | 140.7  | LOC91461  | <a href="#">XM_038576.6</a> |                   |         |
| GI_37546893-S | 955.6  | 953.2  | 789.6  | MTA3      | <a href="#">XM_038567.6</a> |                   |         |
| GI_37546895-S | 125.9  | 111.3  | 101.6  | LOC375198 | <a href="#">XM_351432.1</a> |                   |         |

|               |         |        |       |             |                             |                |            |
|---------------|---------|--------|-------|-------------|-----------------------------|----------------|------------|
| GI_37546901-S | 122.1   | 107.4  | 102.3 | KIAA2028    | <a href="#">XM_059415.4</a> | actin          | cytoskelet |
| GI_37546902-S | 87.9    | 85.6   | 88.3  | LOC375201   | <a href="#">XM_353279.1</a> |                |            |
| GI_37546904-S | 101.8   | 103.5  | 106.6 | LOC151111   | <a href="#">XM_087097.2</a> |                |            |
| GI_37546906-S | 180.5   | 213.6  | 190.1 | LOC375202   | <a href="#">XM_353280.1</a> |                |            |
| GI_37546908-S | 286.6   | 326    | 308.6 | LOC375203   | <a href="#">XM_351435.1</a> |                |            |
| GI_37546910-S | 136.1   | 150.5  | 155.5 | LOC375204   | <a href="#">XM_353281.1</a> |                |            |
| GI_37546913-S | 94.9    | 96.1   | 102   | LOC375205   | <a href="#">XM_351436.1</a> |                |            |
| GI_37546917-S | 105.1   | 122.1  | 110   | LOC344403   | <a href="#">XM_293032.3</a> |                |            |
| GI_37546921-S | 605.2   | 628.5  | 390.7 | LOC339804   | <a href="#">XM_291016.2</a> |                |            |
| GI_37546924-S | 135.7   | 123.9  | 127.3 | FLJ13305    | <a href="#">XM_291019.2</a> |                |            |
| GI_37546926-S | 24634.6 | 22421  | 16069 | LOC375207   | <a href="#">XM_351437.1</a> |                |            |
| GI_37546934-S | 88.3    | 102.2  | 95.8  | LOC285002   | <a href="#">XM_353282.1</a> |                |            |
| GI_37546938-S | 806     | 731.9  | 927.1 | SEC15B      | <a href="#">XM_039570.5</a> |                |            |
| GI_37546944-S | 483     | 632    | 585.8 | MGC22014    | <a href="#">XM_351441.1</a> |                |            |
| GI_37546946-S | 407.5   | 468.2  | 431.5 | LOC375211   | <a href="#">XM_351442.1</a> |                |            |
| GI_37546948-S | 99.7    | 110.9  | 110.1 | LOC375212   | <a href="#">XM_351443.1</a> |                |            |
| GI_37546950-S | 325.3   | 208.3  | 341.3 | LOC257200   | <a href="#">XM_171008.2</a> |                |            |
| GI_37546953-S | 173.1   | 224    | 194.5 | LOC375213   | <a href="#">XM_351444.1</a> |                |            |
| GI_37546955-S | 103.2   | 108.4  | 139.9 | FLJ23529    | <a href="#">XM_049952.2</a> |                |            |
| GI_37546957-S | 221.5   | 188.4  | 149   | LOC129293   | <a href="#">XM_059341.4</a> |                |            |
| GI_37546959-S | 224.8   | 230.9  | 239.8 | LOC375215   | <a href="#">XM_351445.1</a> |                |            |
| GI_37546969-S | 152.7   | 180.2  | 180.6 | LOC115281   | <a href="#">XM_036448.7</a> |                |            |
| GI_37546973-S | 99      | 99.6   | 98.3  | LOC344165   | <a href="#">XM_292957.2</a> |                |            |
| GI_37546978-S | 4486.8  | 4677.6 | 3335  | LOC376872   | <a href="#">XM_352441.1</a> |                |            |
| GI_37546980-S | 173.2   | 195.1  | 177.7 | LOC376873   | <a href="#">XM_352442.1</a> |                |            |
| GI_37546982-S | 275.5   | 354    | 327.4 | LOC376874   | <a href="#">XM_352443.1</a> |                |            |
| GI_37546984-S | 83.9    | 97.9   | 89.7  | LOC130482   | <a href="#">XM_065743.6</a> |                |            |
| GI_37546986-S | 105.7   | 115.9  | 103.4 | LOC376875   | <a href="#">XM_352444.1</a> |                |            |
| GI_37546996-S | 173.6   | 208.8  | 194.3 | LOC344382   | <a href="#">XM_293026.3</a> |                |            |
| GI_37547004-S | 134.8   | 124.7  | 119.2 | LOC376891   | <a href="#">XM_352450.1</a> |                |            |
| GI_37547008-S | 190.6   | 210.7  | 196.4 | LOC129656   | <a href="#">XM_065332.7</a> |                |            |
| GI_37547010-S | 97      | 110.6  | 91.2  | LOC376892   | <a href="#">XM_352451.1</a> |                |            |
| GI_37547012-S | 497.5   | 711.9  | 619.5 | PSME4       | <a href="#">XM_040158.5</a> | PA200;KIAA0077 |            |
| GI_37547014-S | 126.7   | 141    | 142   | LOC344405   | <a href="#">XM_293034.2</a> |                |            |
| GI_37547028-S | 183.6   | 230.2  | 222.9 | LOC344167   | <a href="#">XM_292958.3</a> |                |            |
| GI_37547034-S | 338.1   | 431.2  | 352.7 | LOC374968   | <a href="#">XM_351247.1</a> |                |            |
| GI_37547042-S | 296     | 399.8  | 355.4 | PRNPIP      | <a href="#">XM_290941.2</a> |                |            |
| GI_37547044-S | 261.7   | 309.7  | 246   | LOC339541   | <a href="#">XM_294997.2</a> |                |            |
| GI_37547050-S | 134.2   | 143.1  | 136.5 | KIAA1511    | <a href="#">XM_046581.6</a> |                |            |
| GI_37547052-S | 132.8   | 149.3  | 141.2 | DKFZP564112 | <a href="#">XM_032397.3</a> |                |            |
| GI_37547053-S | 114.6   | 118    | 111   | LOC374973   | <a href="#">XM_351251.1</a> |                |            |
| GI_37547060-S | 151.2   | 178.2  | 158.5 | DMRTA2      | <a href="#">XM_027162.2</a> |                |            |
| GI_37547062-S | 117.9   | 141.4  | 125.2 | LOC284546   | <a href="#">XM_209252.2</a> |                |            |
| GI_37547063-S | 107.9   | 119.6  | 117.6 | C1orf34     | <a href="#">XM_027172.2</a> |                |            |

|               |        |        |        |           |                              |
|---------------|--------|--------|--------|-----------|------------------------------|
| GI_37547065-S | 441.8  | 527.5  | 605.9  | KIAA1836  | <a href="#">XM 114087.4</a>  |
| GI_37547067-S | 422.3  | 399.9  | 334.4  | KIAA0191  | <a href="#">XM 038288.8</a>  |
| GI_37547069-S | 88.7   | 89.7   | 88.9   | LOC374975 | <a href="#">XM 351253.1</a>  |
| GI_37547073-S | 138.2  | 136    | 137.1  | LOC374976 | <a href="#">XM 351254.1</a>  |
| GI_37547075-S | 145.1  | 157.8  | 139.7  | LOC374977 | <a href="#">XM 351255.1</a>  |
| GI_37547077-S | 970.3  | 949.9  | 888.5  | USP24     | <a href="#">XM 165973.4</a>  |
| GI_37547079-S | 119.2  | 119.4  | 105.1  | LOC374978 | <a href="#">XM 351256.1</a>  |
| GI_37547083-S | 119.4  | 139.8  | 114.8  | KIAA1915  | <a href="#">XM 055481.6</a>  |
| GI_37547085-S | 106.1  | 124.1  | 110.6  | KIAA1799  | <a href="#">XM 351258.1</a>  |
| GI_37547087-S | 115.9  | 112    | 117.1  | LOC284671 | <a href="#">XM 209313.3</a>  |
| GI_37547093-S | 129.1  | 149.2  | 126.5  | INPP5B    | <a href="#">XM 290919.2</a>  |
| GI_37547099-S | 94.7   | 89.6   | 98.5   | LOC128208 | <a href="#">XM 060880.9</a>  |
| GI_37547101-S | 108.7  | 124.3  | 117.8  | LOC128192 | <a href="#">XM 060887.2</a>  |
| GI_37547103-S | 110.5  | 107.9  | 111.8  | LOC200010 | <a href="#">XM 117174.3</a>  |
| GI_37547107-S | 722.7  | 750.8  | 617.3  | LOC376601 | <a href="#">XM 352304.1</a>  |
| GI_37547115-S | 129.8  | 145.1  | 127.9  | LOC376607 | <a href="#">XM 352306.1</a>  |
| GI_37547117-S | 96.6   | 102.6  | 89.6   | LOC376609 | <a href="#">XM 352307.1</a>  |
| GI_37547125-S | 3435.9 | 5367.5 | 711.1  | D2S448    | <a href="#">XM 056455.3</a>  |
| GI_37547129-S | 168.8  | 191.5  | 198.3  | LOC376863 | <a href="#">XM 352435.1</a>  |
| GI_37547136-S | 107.9  | 119.9  | 115.5  | LOC375014 | <a href="#">XM 353213.1</a>  |
| GI_37547138-S | 132.4  | 147.6  | 140.6  | LOC375182 | <a href="#">XM 353276.1</a>  |
| GI_37547147-S | 131.7  | 125.1  | 125.9  | LOC285016 | <a href="#">XM 211736.4</a>  |
| GI_37547148-S | 123.2  | 114.7  | 113.3  | LOC200491 | <a href="#">XM 117239.5</a>  |
| GI_37547151-S | 152.3  | 162.1  | 136.3  | LOC375180 | <a href="#">XM 353275.1</a>  |
| GI_37547153-S | 112.1  | 100.7  | 102.6  | LOC376651 | <a href="#">XM 352323.1</a>  |
| GI_37547158-S | 111.9  | 123.9  | 116.1  | LOC200493 | <a href="#">XM 115715.4</a>  |
| GI_37547173-S | 146.9  | 155.6  | 131.8  | NFASC     | <a href="#">XM 046808.10</a> |
| GI_37547175-S | 342.6  | 392.3  | 383.8  | KIAA0472  | <a href="#">XM 290898.2</a>  |
| GI_37547177-S | 119.5  | 108.8  | 91.5   | LOC93273  | <a href="#">XM 351317.1</a>  |
| GI_37547182-S | 98.8   | 101.2  | 93.2   | LOC344065 | <a href="#">XM 292895.2</a>  |
| GI_37547184-S | 114.2  | 128.7  | 123.9  | LOC375241 | <a href="#">XM 353286.1</a>  |
| GI_37547198-S | 86.7   | 97     | 87.5   | LOC150763 | <a href="#">XM 086996.3</a>  |
| GI_37547210-S | 104.7  | 107.3  | 96.6   | LOC375249 | <a href="#">XM 351475.1</a>  |
| GI_37547214-S | 120.1  | 104.5  | 90.5   | LOC205272 | <a href="#">XM 115760.3</a>  |
| GI_37547218-S | 89.2   | 75.8   | 89.5   | LOC129870 | <a href="#">XM 065445.2</a>  |
| GI_37547222-S | 92.6   | 100.1  | 97.4   | MRF-1     | <a href="#">XM 049068.6</a>  |
| GI_37547226-S | 105.3  | 101.2  | 94.6   | LOC374935 | <a href="#">XM 351222.1</a>  |
| GI_37547228-S | 259.2  | 307.3  | 300.8  | LOC284591 | <a href="#">XM 211529.3</a>  |
| GI_37547229-S | 80.3   | 86.5   | 76.9   | LOC376555 | <a href="#">XM 352285.1</a>  |
| GI_37547236-S | 121.1  | 106.4  | 96.6   | LOC376934 | <a href="#">XM 352469.1</a>  |
| GI_37547250-S | 129.9  | 147.8  | 140.5  | LOC376917 | <a href="#">XM 352461.1</a>  |
| GI_37547259-S | 162.6  | 171.3  | 127.8  | LOC374963 | <a href="#">XM 351244.1</a>  |
| GI_37547270-S | 155.8  | 183.4  | 149.8  | LOC376583 | <a href="#">XM 352298.1</a>  |
| GI_37547272-S | 1559.7 | 2423.6 | 1767.8 | LOC376584 | <a href="#">XM 352299.1</a>  |



|               |        |        |        |           |                             |
|---------------|--------|--------|--------|-----------|-----------------------------|
| GI_37547280-S | 277.2  | 148.6  | 155.9  | EGFL3     | <a href="#">XM 031401.6</a> |
| GI_37547282-S | 88.7   | 98.7   | 102.8  | LOC374940 | <a href="#">XM 353191.1</a> |
| GI_37547284-S | 556.8  | 491.2  | 399.7  | LOC374941 | <a href="#">XM 353192.1</a> |
| GI_37547286-S | 147.3  | 151.6  | 162    | LOC376559 | <a href="#">XM 352288.1</a> |
| GI_37547296-S | 106.4  | 122.9  | 91.7   | LOC374938 | <a href="#">XM 351227.1</a> |
| GI_37547301-S | 348.4  | 273.5  | 245.3  | LOC375062 | <a href="#">XM 351327.1</a> |
| GI_37547314-S | 158.5  | 178.3  | 167.1  | LOC375277 | <a href="#">XM 351498.1</a> |
| GI_37547316-S | 110.2  | 111.3  | 107.5  | LOC375278 | <a href="#">XM 353297.1</a> |
| GI_37547327-S | 199.4  | 232.1  | 198.7  | LOC375282 | <a href="#">XM 353298.1</a> |
| GI_37547331-S | 98.1   | 100.4  | 106.2  | LOC344147 | <a href="#">XM 292942.2</a> |
| GI_37547335-S | 98.4   | 108.9  | 97.4   | KIAA1679  | <a href="#">XM 046570.4</a> |
| GI_37547337-S | 416.7  | 632.6  | 522.2  | LOC150498 | <a href="#">XM 086931.5</a> |
| GI_37547343-S | 132.3  | 131.1  | 124.6  | PGR6      | <a href="#">XM 293092.2</a> |
| GI_37547347-S | 2296.8 | 3421.6 | 3058.2 | LOC129439 | <a href="#">XM 065237.5</a> |
| GI_37547351-S | 91.1   | 97.8   | 91.7   | LOC376957 | <a href="#">XM 352480.1</a> |
| GI_37547365-S | 138    | 173.4  | 150.7  | LOC376963 | <a href="#">XM 352484.1</a> |
| GI_37547393-S | 93.5   | 123.7  | 112.3  | LOC339760 | <a href="#">XM 295058.2</a> |
| GI_37547395-S | 87.8   | 83.4   | 80.8   | LOC375267 | <a href="#">XM 353295.1</a> |
| GI_37547399-S | 110.4  | 108    | 99.2   | LOC375268 | <a href="#">XM 353296.1</a> |
| GI_37547401-S | 116.8  | 101.5  | 101.6  | LOC375269 | <a href="#">XM 351489.1</a> |
| GI_37547404-S | 115.3  | 137.6  | 121.1  | LOC375270 | <a href="#">XM 351490.1</a> |
| GI_37547418-S | 160.4  | 204.7  | 196.1  | LOC339761 | <a href="#">XM 291005.2</a> |
| GI_37547420-S | 178.4  | 207    | 182.3  | LOC376946 | <a href="#">XM 352476.1</a> |
| GI_37547422-S | 209.9  | 229.9  | 204.7  | LOC285101 | <a href="#">XM 210411.3</a> |
| GI_37547468-S | 349.3  | 303.1  | 294.5  | FLJ37034  | <a href="#">XM 352945.1</a> |
| GI_37547470-S | 150.4  | 151.5  | 146.2  | LOC375314 | <a href="#">XM 351522.1</a> |
| GI_37547472-S | 100.7  | 118.9  | 105.3  | LOC339766 | <a href="#">XM 291007.2</a> |
| GI_37547476-S | 116.8  | 109.7  | 103.6  | LOC375315 | <a href="#">XM 353311.1</a> |
| GI_37547484-S | 167.9  | 177.3  | 179.1  | LOC151174 | <a href="#">XM 351524.1</a> |
| GI_37547486-S | 198.4  | 206.9  | 179.1  | LOC151507 | <a href="#">XM 087225.3</a> |
| GI_37547488-S | 141.9  | 171    | 153.9  | LOC339767 | <a href="#">XM 292989.3</a> |
| GI_37547492-S | 128.7  | 142.4  | 121.5  | LOC377008 | <a href="#">XM 352497.1</a> |
| GI_37547499-S | 93.7   | 97.8   | 104.2  | LOC375037 | <a href="#">XM 351307.1</a> |
| GI_37547503-S | 119.5  | 143.1  | 145.5  | KIAA2025  | <a href="#">XM 086409.5</a> |
| GI_37547505-S | 425    | 494.2  | 453.7  | TNN       | <a href="#">XM 040527.5</a> |
| GI_37547507-S | 108.1  | 112.2  | 116.6  | LOC375038 | <a href="#">XM 353221.1</a> |
| GI_37547509-S | 346    | 434.7  | 388.6  | ASTN      | <a href="#">XM 045113.3</a> |
| GI_37547514-S | 95.7   | 108    | 92     | LOC375041 | <a href="#">XM 353222.1</a> |
| GI_37547516-S | 112.5  | 124.6  | 113.9  | LOC376675 | <a href="#">XM 352330.1</a> |
| GI_37547518-S | 444.4  | 410.9  | 332.5  | LOC376679 | <a href="#">XM 352331.1</a> |
| GI_37547520-S | 89.5   | 99.3   | 86.7   | LOC376681 | <a href="#">XM 352332.1</a> |
| GI_37547528-S | 129.6  | 147.8  | 140.4  | LOC376686 | <a href="#">XM 352333.1</a> |
| GI_37547539-S | 928.1  | 929.9  | 812.2  | KIDINS220 | <a href="#">XM 291015.2</a> |
| GI_37547541-S | 171.2  | 231    | 197.3  | LOC375183 | <a href="#">XM 353277.1</a> |

|               |        |        |        |            |                             |                       |                             |
|---------------|--------|--------|--------|------------|-----------------------------|-----------------------|-----------------------------|
| GI_37547937-S | 115.2  | 117.3  | 111.1  | LOC374967  | <a href="#">XM_353200.1</a> |                       |                             |
| GI_37547939-S | 93     | 90.7   | 83.3   | LOC149086  | <a href="#">XM_097580.3</a> |                       |                             |
| GI_37548017-S | 141.5  | 177.4  | 150.4  | LOC127550  | <a href="#">XM_060537.8</a> |                       |                             |
| GI_37548193-S | 101.6  | 105.9  | 100.8  | LOC90719   | <a href="#">XM_033704.3</a> |                       |                             |
| GI_37548194-S | 158.2  | 168.8  | 173.7  | LOC376587  | <a href="#">XM_352301.1</a> |                       |                             |
| GI_37548197-S | 132.3  | 158.8  | 161    | LOC374942  | <a href="#">XM_353193.1</a> |                       |                             |
| GI_37548199-S | 130.2  | 128.1  | 131.3  | LOC376563  | <a href="#">XM_352290.1</a> |                       |                             |
| GI_37548317-S | 91     | 81.5   | 81.5   | LOC126772  | <a href="#">XM_060171.3</a> |                       |                             |
| GI_37548519-S | 80.9   | 90.9   | 84.3   | LOC347813  | <a href="#">XM_351322.1</a> |                       |                             |
| GI_37548521-S | 103.3  | 112.1  | 100.2  | LOC127602  | <a href="#">XM_059166.6</a> |                       |                             |
| GI_37548529-S | 217.9  | 247.8  | 223.3  | KIAA1639   | <a href="#">XM_290923.2</a> |                       |                             |
| GI_37548531-S | 291.1  | 269    | 287    | LOC149603  | <a href="#">XM_047499.5</a> |                       |                             |
| GI_37548535-S | 266.6  | 315.8  | 272.1  | LOC375059  | <a href="#">XM_353228.1</a> |                       |                             |
| GI_37548537-S | 117.7  | 129.5  | 117.1  | LOC376711  | <a href="#">XM_352343.1</a> |                       |                             |
| GI_37548547-S | 167.6  | 188.1  | 167.4  | LOC376716  | <a href="#">XM_352345.1</a> |                       |                             |
| GI_37548549-S | 189.9  | 235    | 195.8  | LOC376718  | <a href="#">XM_352346.1</a> |                       |                             |
| GI_37548551-S | 489.5  | 511.9  | 419.9  | LOC343363  | <a href="#">XM_291533.2</a> |                       |                             |
| GI_37548608-S | 106.3  | 116.3  | 102.8  | LOC374960  | <a href="#">XM_351241.1</a> |                       |                             |
| GI_37548610-S | 152.8  | 184.1  | 155.2  | LOC254897  | <a href="#">XM_170950.2</a> |                       |                             |
| GI_37548613-S | 103.9  | 95.9   | 92.8   | KIF17      | <a href="#">XM_027915.8</a> | KIF3X;KIF17B;KIAA1405 | ATP microtubul intracellula |
| GI_37548619-S | 275    | 329.6  | 304.9  | LOC127309  | <a href="#">XM_059132.3</a> |                       |                             |
| GI_37548623-S | 107    | 114.3  | 99.8   | LOC376578  | <a href="#">XM_352297.1</a> |                       |                             |
| GI_37548625-S | 100.8  | 112.4  | 104    | LOC163933  | <a href="#">XM_089243.7</a> |                       |                             |
| GI_37548627-S | 91.8   | 99.8   | 93.5   | LOC343381  | <a href="#">XM_291543.2</a> |                       |                             |
| GI_37548628-S | 2580.7 | 4244.8 | 3603.6 | LOC343384  | <a href="#">XM_291544.2</a> |                       |                             |
| GI_37548655-S | 334.2  | 507    | 323.8  | DKFZP586L1 | <a href="#">XM_034000.6</a> |                       |                             |
| GI_37548657-S | 150.7  | 190.7  | 194.7  | LOC149297  | <a href="#">XM_097622.6</a> |                       |                             |
| GI_37548660-S | 106.2  | 119.1  | 110.5  | LOC92235   | <a href="#">XM_043739.3</a> |                       |                             |
| GI_37548664-S | 103    | 105.8  | 103.3  | LOC375036  | <a href="#">XM_353220.1</a> |                       |                             |
| GI_37548666-S | 95.6   | 102.5  | 91.1   | LOC149281  | <a href="#">XM_089281.2</a> |                       |                             |
| GI_37548754-S | 293.3  | 353.3  | 294.4  | LOC375042  | <a href="#">XM_351309.1</a> |                       |                             |
| GI_37548756-S | 122    | 134.6  | 120.6  | LOC375043  | <a href="#">XM_353223.1</a> |                       |                             |
| GI_37548758-S | 94.5   | 87.2   | 87.2   | LOC343450  | <a href="#">XM_291574.2</a> |                       |                             |
| GI_37548762-S | 437.1  | 453.3  | 515.8  | LOC375044  | <a href="#">XM_351311.1</a> |                       |                             |
| GI_37548764-S | 99.6   | 87.8   | 102.4  | LOC375045  | <a href="#">XM_353224.1</a> |                       |                             |
| GI_37548766-S | 352    | 423.9  | 400.1  | LOC375046  | <a href="#">XM_351313.1</a> |                       |                             |
| GI_37548772-S | 233.6  | 249.8  | 227.2  | LOC375049  | <a href="#">XM_351316.1</a> |                       |                             |
| GI_37548774-S | 326.5  | 445.4  | 345.1  | PPFIA4     | <a href="#">XM_046751.4</a> |                       |                             |
| GI_37548778-S | 94.8   | 86.9   | 96.8   | LOC164036  | <a href="#">XM_089307.4</a> |                       |                             |
| GI_37548786-S | 95.2   | 87.3   | 85.1   | LOC339521  | <a href="#">XM_291577.2</a> |                       |                             |
| GI_37548898-S | 98.7   | 106.7  | 101.1  | LOC343466  | <a href="#">XM_291580.2</a> |                       |                             |
| GI_37548900-S | 243.8  | 296.5  | 261.7  | LOC343472  | <a href="#">XM_291583.3</a> |                       |                             |
| GI_37549240-S | 98.1   | 118.3  | 95.5   | LOC374295  | <a href="#">XM_352938.1</a> |                       |                             |
| GI_37549242-S | 99.3   | 93.2   | 114.8  | LOC148766  | <a href="#">XM_086308.2</a> |                       |                             |

|               |        |        |        |            |                             |                         |         |                      |
|---------------|--------|--------|--------|------------|-----------------------------|-------------------------|---------|----------------------|
| GI_37549244-S | 200.3  | 244.7  | 220.4  | LOC375008  | <a href="#">XM_353212.1</a> |                         |         |                      |
| GI_37549246-S | 1331.9 | 5516.5 | 2401   | PTGFRN     | <a href="#">XM_040709.4</a> | FPRP;EWI-F;CD9P-1;SMAP- | protein | integral to negative |
| GI_37549250-S | 107.5  | 100.2  | 90.7   | LOC343505  | <a href="#">XM_291607.3</a> |                         |         |                      |
| GI_37549297-S | 273.7  | 228.1  | 278.7  | DOCK10     | <a href="#">XM_352946.1</a> |                         |         |                      |
| GI_37549303-S | 172.8  | 194.8  | 159.7  | DKFZP434D1 | <a href="#">XM_114297.4</a> |                         |         |                      |
| GI_37549309-S | 237.1  | 300.6  | 287.7  | LOC375291  | <a href="#">XM_351505.1</a> |                         |         |                      |
| GI_37549311-S | 139    | 124.5  | 114.2  | LOC129881  | <a href="#">XM_059384.7</a> |                         |         |                      |
| GI_37549314-S | 88.8   | 94.4   | 87.3   | LOC375292  | <a href="#">XM_351506.1</a> |                         |         |                      |
| GI_37549316-S | 290.8  | 204.9  | 218.7  | LOC375293  | <a href="#">XM_353303.1</a> |                         |         |                      |
| GI_37549324-S | 99.6   | 118.9  | 99.2   | LOC375296  | <a href="#">XM_351507.1</a> |                         |         |                      |
| GI_37549326-S | 324.4  | 395.3  | 344.6  | LOC375297  | <a href="#">XM_351508.1</a> |                         |         |                      |
| GI_37549328-S | 97.2   | 101.2  | 101    | LOC375298  | <a href="#">XM_353305.1</a> |                         |         |                      |
| GI_37549330-S | 127.4  | 129.7  | 118    | LOC151242  | <a href="#">XM_087137.5</a> |                         |         |                      |
| GI_37549332-S | 166.5  | 203.7  | 172.5  | LOC375299  | <a href="#">XM_351509.1</a> |                         |         |                      |
| GI_37549338-S | 647.3  | 803.1  | 509.4  | MYO1B      | <a href="#">XM_290989.2</a> | myr1                    | actin   | myosin               |
| GI_37549340-S | 92.2   | 90.4   | 86.7   | LOC375300  | <a href="#">XM_353306.1</a> |                         |         |                      |
| GI_37549342-S | 1489.4 | 1576.1 | 1192.7 | KIAA1265   | <a href="#">XM_047707.5</a> |                         |         |                      |
| GI_37549344-S | 120.3  | 127.6  | 119.2  | LOC375301  | <a href="#">XM_351511.1</a> |                         |         |                      |
| GI_37549346-S | 100.9  | 102.3  | 96.7   | LOC375302  | <a href="#">XM_353307.1</a> |                         |         |                      |
| GI_37549350-S | 187.9  | 227    | 196.4  | FLJ39061   | <a href="#">XM_092342.4</a> |                         |         |                      |
| GI_37549357-S | 91     | 89     | 93.4   | LOC375303  | <a href="#">XM_351512.1</a> |                         |         |                      |
| GI_37549373-S | 110.9  | 118.4  | 101.6  | IHH        | <a href="#">XM_050846.5</a> |                         |         |                      |
| GI_37549375-S | 114.6  | 116.3  | 116.5  | LOC375308  | <a href="#">XM_351515.1</a> |                         |         |                      |
| GI_37549379-S | 127    | 142.4  | 122.2  | LOC375309  | <a href="#">XM_351516.1</a> |                         |         |                      |
| GI_37549381-S | 131.3  | 182.8  | 215    | LOC130612  | <a href="#">XM_059461.6</a> |                         |         |                      |
| GI_37549382-S | 212.7  | 205.9  | 248.4  | KIAA0657   | <a href="#">XM_051017.3</a> |                         |         |                      |
| GI_37549388-S | 112.9  | 112.2  | 97.7   | LOC375311  | <a href="#">XM_353310.1</a> |                         |         |                      |
| GI_37549390-S | 91.2   | 82.9   | 86.1   | LOC375312  | <a href="#">XM_351519.1</a> |                         |         |                      |
| GI_37549392-S | 126.3  | 134.5  | 114.6  | LOC375313  | <a href="#">XM_351520.1</a> |                         |         |                      |
| GI_37549394-S | 104.8  | 113.4  | 97.1   | LOC344332  | <a href="#">XM_293018.2</a> |                         |         |                      |
| GI_37549396-S | 3196.2 | 3880.9 | 3059.7 | LOC376965  | <a href="#">XM_352485.1</a> |                         |         |                      |
| GI_37549400-S | 396.7  | 651    | 509.2  | LOC344178  | <a href="#">XM_292963.2</a> |                         |         |                      |
| GI_37549404-S | 106.3  | 108    | 110.1  | LOC376970  | <a href="#">XM_352486.1</a> |                         |         |                      |
| GI_37549409-S | 106.5  | 111.3  | 113.8  | LOC344191  | <a href="#">XM_292968.2</a> |                         |         |                      |
| GI_37549413-S | 133.6  | 215.5  | 153.2  | LOC150739  | <a href="#">XM_092267.2</a> |                         |         |                      |
| GI_37549417-S | 104.9  | 115.6  | 96.1   | LOC376975  | <a href="#">XM_352487.1</a> |                         |         |                      |
| GI_37549445-S | 102.2  | 116.5  | 102.9  | LOC130429  | <a href="#">XM_065722.2</a> |                         |         |                      |
| GI_37549449-S | 166.7  | 154.2  | 160.1  | LOC200595  | <a href="#">XM_115769.2</a> |                         |         |                      |
| GI_37549451-S | 144.4  | 159    | 134.6  | LOC376992  | <a href="#">XM_352490.1</a> |                         |         |                      |
| GI_37549455-S | 121.5  | 122.5  | 132.7  | KIAA1399   | <a href="#">XM_046685.7</a> |                         |         |                      |
| GI_37549460-S | 107.5  | 101.2  | 97.8   | LOC130600  | <a href="#">XM_065796.2</a> |                         |         |                      |
| GI_37549466-S | 99.2   | 129.8  | 109.4  | LOC377005  | <a href="#">XM_352494.1</a> |                         |         |                      |
| GI_37549470-S | 150.7  | 128.2  | 153.4  | FLJ10157   | <a href="#">XM_352939.1</a> |                         |         |                      |
| GI_37549482-S | 98.9   | 105.4  | 101.6  | LOC375066  | <a href="#">XM_353231.1</a> |                         |         |                      |

|               |         |       |       |           |                              |                                                               |
|---------------|---------|-------|-------|-----------|------------------------------|---------------------------------------------------------------|
| GI_37549488-S | 261.9   | 322.6 | 266.2 | LOC339529 | <a href="#">XM_294993.2</a>  |                                                               |
| GI_37549490-S | 87.3    | 82.3  | 91.6  | LOC343484 | <a href="#">XM_295598.2</a>  |                                                               |
| GI_37549492-S | 102.2   | 97.1  | 115.7 | LOC200159 | <a href="#">XM_114129.3</a>  |                                                               |
| GI_37549498-S | 106.7   | 118.9 | 101.3 | LOC376727 | <a href="#">XM_352348.1</a>  |                                                               |
| GI_37549504-S | 108.7   | 112.9 | 116.7 | LOC376735 | <a href="#">XM_352349.1</a>  |                                                               |
| GI_37549519-S | 117     | 147.6 | 146.6 | LOC126755 | <a href="#">XM_059074.2</a>  |                                                               |
| GI_37549523-S | 128.7   | 136.3 | 115.4 | LOC374952 | <a href="#">XM_351232.1</a>  |                                                               |
| GI_37549525-S | 128.2   | 150.7 | 134.4 | KIAA1937  | <a href="#">XM_057107.4</a>  |                                                               |
| GI_37549529-S | 260.7   | 302.9 | 281.8 | LOC374953 | <a href="#">XM_351233.1</a>  |                                                               |
| GI_37549531-S | 22129.8 | 20418 | 16759 | LOC374954 | <a href="#">XM_351234.1</a>  |                                                               |
| GI_37549535-S | 101.2   | 117.7 | 106.5 | KIAA1026  | <a href="#">XM_048825.8</a>  |                                                               |
| GI_37549539-S | 137.1   | 152   | 166.7 | KIAA0842  | <a href="#">XM_290944.2</a>  |                                                               |
| GI_37549550-S | 248.5   | 305.6 | 268.9 | LOC285192 | <a href="#">XM_351525.1</a>  |                                                               |
| GI_37549554-S | 109.2   | 113.5 | 97.8  | LOC285188 | <a href="#">XM_209505.2</a>  |                                                               |
| GI_37549556-S | 129.8   | 173.8 | 175.8 | FLJ00133  | <a href="#">XM_059482.6</a>  |                                                               |
| GI_37549558-S | 248.2   | 344.2 | 271.9 | LOC344525 | <a href="#">XM_297687.3</a>  |                                                               |
| GI_37549560-S | 250.7   | 278.5 | 262.6 | LOC375319 | <a href="#">XM_353313.1</a>  |                                                               |
| GI_37549566-S | 118.3   | 130.4 | 130.7 | LOC150681 | <a href="#">XM_092241.7</a>  |                                                               |
| GI_37549568-S | 134.8   | 153.3 | 131   | LOC377010 | <a href="#">XM_352499.1</a>  |                                                               |
| GI_37549570-S | 160.1   | 210   | 179.3 | LOC377011 | <a href="#">XM_352500.1</a>  |                                                               |
| GI_37549572-S | 90.7    | 80.1  | 87    | LOC377012 | <a href="#">XM_352501.1</a>  |                                                               |
| GI_37549574-S | 75.8    | 70.2  | 80.9  | LOC377013 | <a href="#">XM_352502.1</a>  |                                                               |
| GI_37549590-S | 140.8   | 162.1 | 159.5 | LOC374931 | <a href="#">XM_353188.1</a>  |                                                               |
| GI_37549609-S | 145.2   | 172.7 | 143.3 | LOC374936 | <a href="#">XM_351223.1</a>  |                                                               |
| GI_37549618-S | 122.5   | 139   | 139.1 | LOC339453 | <a href="#">XM_294960.2</a>  |                                                               |
| GI_37549620-S | 122.8   | 140.4 | 124.5 | LOC376558 | <a href="#">XM_352287.1</a>  |                                                               |
| GI_37549625-S | 154.7   | 179.8 | 145.3 | LOC343531 | <a href="#">XM_291627.2</a>  |                                                               |
| GI_37549631-S | 129.9   | 142.4 | 138.6 | KIAA1922  | <a href="#">XM_057040.2</a>  |                                                               |
| GI_37549642-S | 84.1    | 91    | 85.1  | LOC376645 | <a href="#">XM_352317.1</a>  |                                                               |
| GI_37549647-S | 74      | 73.9  | 78.2  | LOC375019 | <a href="#">XM_353215.1</a>  |                                                               |
| GI_37549664-S | 166.1   | 202.2 | 198.9 | MGC34132  | <a href="#">XM_291029.3</a>  |                                                               |
| GI_37549667-S | 99.7    | 105.8 | 96.3  | GRSP1     | <a href="#">XM_114303.2</a>  |                                                               |
| GI_37549669-S | 381.4   | 678   | 413.6 | LOC375351 | <a href="#">XM_351558.1</a>  |                                                               |
| GI_37549671-S | 102.4   | 116.2 | 103.3 | SEMACAP3  | <a href="#">XM_041363.10</a> |                                                               |
| GI_37549673-S | 102.2   | 114.2 | 101.1 | CNTN3     | <a href="#">XM_039627.8</a>  |                                                               |
| GI_37549679-S | 104     | 100.2 | 104.3 | LOC376748 | <a href="#">XM_352361.1</a>  |                                                               |
| GI_37549681-S | 432.2   | 512.1 | 371.7 | LOC285296 | <a href="#">XM_208312.2</a>  |                                                               |
| GI_37549687-S | 85.1    | 102.5 | 87    | ROBO2     | <a href="#">XM_031246.8</a>  |                                                               |
| GI_37549691-S | 83.2    | 86.4  | 73.5  | LOC375357 | <a href="#">XM_351563.1</a>  |                                                               |
| GI_37549693-S | 99.2    | 95.2  | 98.9  | LOC344709 | <a href="#">XM_298233.3</a>  |                                                               |
| GI_37549705-S | 101.6   | 83.5  | 92.5  | LOC377065 | <a href="#">XM_352519.1</a>  |                                                               |
| GI_37549711-S | 133.7   | 139   | 120.9 | LOC339495 | <a href="#">XM_290926.2</a>  |                                                               |
| GI_37549742-S | 117.8   | 128.5 | 130.3 | LOC375029 | <a href="#">XM_351299.1</a>  |                                                               |
| GI_37549744-S | 275.6   | 298   | 268.7 | ATP8B2    | <a href="#">XM_290875.2</a>  | ATPID;KIAA1137;DKFZp434M0219      magnesiu integral to cation |

|               |        |        |                 |                             |                                |
|---------------|--------|--------|-----------------|-----------------------------|--------------------------------|
| GI_37549750-S | 88     | 88.2   | 87 KIAA0446     | <a href="#">XM_044155.2</a> | transporte mitochond transport |
| GI_37549754-S | 160.1  | 173.6  | 153.9 LOC375033 | <a href="#">XM_351303.1</a> |                                |
| GI_37549760-S | 225.6  | 465.2  | 150.7 VANGL2    | <a href="#">XM_049695.5</a> |                                |
| GI_37549762-S | 109.1  | 108.8  | 112.1 LOC257177 | <a href="#">XM_170909.2</a> |                                |
| GI_37549764-S | 382.9  | 464.6  | 413.7 LOC343052 | <a href="#">XM_295309.2</a> |                                |
| GI_37549769-S | 367.9  | 465.2  | 367.9 LOC92312  | <a href="#">XM_044166.6</a> |                                |
| GI_37549771-S | 201.9  | 249.7  | 204.6 LOC164118 | <a href="#">XM_089384.7</a> |                                |
| GI_37549775-S | 111.2  | 123.6  | 122.8 LOC128360 | <a href="#">XM_060945.2</a> |                                |
| GI_37549777-S | 118.6  | 127.8  | 115.3 LOC343406 | <a href="#">XM_291548.2</a> |                                |
| GI_37549779-S | 151.2  | 175.6  | 164 LOC376663   | <a href="#">XM_352327.1</a> |                                |
| GI_37549781-S | 162.2  | 191.2  | 179.3 LOC128366 | <a href="#">XM_060951.3</a> |                                |
| GI_37549785-S | 152.6  | 178.6  | 175.7 LOC128370 | <a href="#">XM_060955.3</a> |                                |
| GI_37549793-S | 101.6  | 99.8   | 97.3 LOC127385  | <a href="#">XM_060458.4</a> |                                |
| GI_37549795-S | 131.2  | 165.5  | 161.2 LOC339511 | <a href="#">XM_291568.2</a> |                                |
| GI_37549797-S | 93.2   | 95.3   | 101 LOC343413   | <a href="#">XM_291569.2</a> |                                |
| GI_37549799-S | 233.5  | 283.5  | 251.4 LOC376666 | <a href="#">XM_352329.1</a> |                                |
| GI_37549804-S | 96.7   | 101.4  | 98.2 LOC376699  | <a href="#">XM_352336.1</a> |                                |
| GI_37549827-S | 1184.9 | 938.6  | 858.4 LOC376751 | <a href="#">XM_352363.1</a> |                                |
| GI_37549837-S | 226.1  | 259.3  | 226.4 LOC376752 | <a href="#">XM_352364.1</a> |                                |
| GI_37549839-S | 94.8   | 111.6  | 88.9 LOC376753  | <a href="#">XM_352365.1</a> |                                |
| GI_37549841-S | 145.8  | 167.4  | 141 LOC376754   | <a href="#">XM_352366.1</a> |                                |
| GI_37549862-S | 91.4   | 99.3   | 98.3 LOC376764  | <a href="#">XM_352375.1</a> |                                |
| GI_37549867-S | 100.9  | 110.5  | 110.3 KIAA1909  | <a href="#">XM_291137.2</a> | FLJ43173                       |
| GI_37549871-S | 88.2   | 101.4  | 86.8 LOC375430  | <a href="#">XM_351603.1</a> |                                |
| GI_37549873-S | 520.7  | 625.1  | 528.8 LOC375431 | <a href="#">XM_353364.1</a> |                                |
| GI_37549875-S | 99.7   | 110.8  | 106.3 LOC375432 | <a href="#">XM_353365.1</a> |                                |
| GI_37549879-S | 116.4  | 112.2  | 121.1 LOC375435 | <a href="#">XM_353367.1</a> |                                |
| GI_37549884-S | 114.7  | 105.6  | 119.1 LOC340094 | <a href="#">XM_295155.2</a> |                                |
| GI_37549886-S | 2089.4 | 1847.3 | 1855 KIAA0947   | <a href="#">XM_029101.6</a> |                                |
| GI_37549888-S | 113.6  | 129.7  | 125.2 LOC134111 | <a href="#">XM_059689.3</a> |                                |
| GI_37549894-S | 113.5  | 115    | 96.8 LOC375438  | <a href="#">XM_353369.1</a> |                                |
| GI_37549896-S | 106.3  | 107.4  | 91.5 LOC377233  | <a href="#">XM_352571.1</a> |                                |
| GI_37549900-S | 122.6  | 127.3  | 127 LOC340024   | <a href="#">XM_291120.3</a> |                                |
| GI_37549904-S | 91.4   | 101.6  | 92.1 LOC345711  | <a href="#">XM_293937.3</a> |                                |
| GI_37549908-S | 102    | 99.3   | 103 LOC340096   | <a href="#">XM_293943.2</a> |                                |
| GI_37549910-S | 184.8  | 229.9  | 212.5 LOC348938 | <a href="#">XM_351632.1</a> |                                |
| GI_37549912-S | 115.6  | 109.7  | 104 LOC375478   | <a href="#">XM_351633.1</a> |                                |
| GI_37549914-S | 79.3   | 98.2   | 86.7 KIAA1935   | <a href="#">XM_087672.2</a> |                                |
| GI_37549920-S | 144.2  | 166.3  | 149 LOC285588   | <a href="#">XM_209668.2</a> |                                |
| GI_37549924-S | 103.3  | 106.8  | 98.7 LOC375480  | <a href="#">XM_353389.1</a> |                                |
| GI_37549926-S | 202.5  | 226.8  | 222.5 LOC375481 | <a href="#">XM_353390.1</a> |                                |
| GI_37549928-S | 107.4  | 107.7  | 120.4 LOC375482 | <a href="#">XM_351635.1</a> |                                |
| GI_37549934-S | 106.9  | 117.4  | 104.5 KIAA1976  | <a href="#">XM_030300.5</a> |                                |
| GI_37549941-S | 109.9  | 106.6  | 99.5 LOC134541  | <a href="#">XM_068903.3</a> |                                |

|               |        |        |        |            |                             |
|---------------|--------|--------|--------|------------|-----------------------------|
| GI_37549943-S | 92.5   | 89.5   | 90     | LOC345630  | <a href="#">XM_293903.2</a> |
| GI_37549949-S | 100.3  | 100.1  | 95.7   | LOC377323  | <a href="#">XM_352593.1</a> |
| GI_37549951-S | 161.6  | 181.4  | 173.2  | LOC377324  | <a href="#">XM_352594.1</a> |
| GI_37549957-S | 172.5  | 192.8  | 180.4  | LOC375458  | <a href="#">XM_353375.1</a> |
| GI_37549959-S | 2363.5 | 2891.1 | 2265.7 | LOC375459  | <a href="#">XM_351625.1</a> |
| GI_37549971-S | 355.5  | 367.8  | 302.6  | KIAA1311   | <a href="#">XM_291128.2</a> |
| GI_37549973-S | 106.1  | 97.6   | 99.8   | LOC375475  | <a href="#">XM_351631.1</a> |
| GI_37549975-S | 167.7  | 223.8  | 199.4  | LOC340075  | <a href="#">XM_291139.2</a> |
| GI_37549977-S | 149.8  | 177.2  | 152.2  | LOC375476  | <a href="#">XM_353387.1</a> |
| GI_37549979-S | 145    | 162.6  | 141.2  | LOC375477  | <a href="#">XM_353388.1</a> |
| GI_37549985-S | 130.4  | 129.6  | 134.5  | KIAA1317   | <a href="#">XM_098368.4</a> |
| GI_37549991-S | 97.8   | 126.4  | 119.9  | LOC345611  | <a href="#">XM_293893.2</a> |
| GI_37549993-S | 256.6  | 287.9  | 265.8  | LOC377315  | <a href="#">XM_352590.1</a> |
| GI_37549999-S | 113.9  | 115.9  | 108    | LOC375322  | <a href="#">XM_353316.1</a> |
| GI_37550005-S | 151.7  | 150    | 144    | LOC375325  | <a href="#">XM_353318.1</a> |
| GI_37550007-S | 628    | 817.8  | 966.4  | KIAA0121   | <a href="#">XM_052386.3</a> |
| GI_37550009-S | 143.5  | 185.4  | 140.7  | TIP120B    | <a href="#">XM_351535.1</a> |
| GI_37550011-S | 121.3  | 115.2  | 103.4  | KIAA1719   | <a href="#">XM_042936.4</a> |
| GI_37550015-S | 896.7  | 799.9  | 628.6  | KIAA0379   | <a href="#">XM_042860.8</a> |
| GI_37550019-S | 110    | 128.6  | 121.9  | LOC375328  | <a href="#">XM_351538.1</a> |
| GI_37550023-S | 105.4  | 103.8  | 108.4  | LOC375329  | <a href="#">XM_351539.1</a> |
| GI_37550025-S | 136.5  | 152    | 133.2  | LOC131405  | <a href="#">XM_067369.3</a> |
| GI_37550027-S | 185.3  | 203.4  | 185.2  | LOC375330  | <a href="#">XM_353319.1</a> |
| GI_37550029-S | 123.9  | 126.9  | 109    | KIAA0527   | <a href="#">XM_171054.2</a> |
| GI_37550031-S | 296.8  | 251.5  | 310.2  | CLASP2     | <a href="#">XM_291057.3</a> |
| GI_37550035-S | 93.3   | 93.3   | 92.3   | KIAA1765   | <a href="#">XM_047355.6</a> |
| GI_37550037-S | 197.2  | 251.3  | 225.8  | KIAA0342   | <a href="#">XM_047357.4</a> |
| GI_37550039-S | 143.7  | 158.4  | 151.8  | LOC375332  | <a href="#">XM_351541.1</a> |
| GI_37550041-S | 93.4   | 94.1   | 93.3   | LOC375333  | <a href="#">XM_351542.1</a> |
| GI_37550045-S | 265.2  | 313.8  | 275.1  | MGC50836   | <a href="#">XM_171060.4</a> |
| GI_37550049-S | 179.3  | 211.3  | 222.8  | DKFZp434E1 | <a href="#">XM_043624.5</a> |
| GI_37550053-S | 95.5   | 94.6   | 92.3   | LOC339903  | <a href="#">XM_291063.2</a> |
| GI_37550054-S | 90.3   | 103.4  | 115.2  | LOC375337  | <a href="#">XM_351544.1</a> |
| GI_37550058-S | 105.5  | 125.5  | 114.8  | LOC285346  | <a href="#">XM_209579.2</a> |
| GI_37550069-S | 1075.1 | 1524.2 | 1391.8 | LOC375340  | <a href="#">XM_351549.1</a> |
| GI_37550075-S | 104    | 119.2  | 115.9  | LOC375342  | <a href="#">XM_351551.1</a> |
| GI_37550079-S | 176.3  | 214.9  | 185    | LOC375344  | <a href="#">XM_353321.1</a> |
| GI_37550081-S | 126.6  | 139.7  | 125.4  | LOC375345  | <a href="#">XM_351553.1</a> |
| GI_37550095-S | 96.1   | 81.8   | 81.7   | LOC132203  | <a href="#">XM_059578.4</a> |
| GI_37550101-S | 123.4  | 132.1  | 128.9  | LOC377024  | <a href="#">XM_352507.1</a> |
| GI_37550107-S | 90.5   | 97.2   | 79.6   | LOC377026  | <a href="#">XM_352508.1</a> |
| GI_37550109-S | 142.2  | 166    | 137    | LOC377027  | <a href="#">XM_352509.1</a> |
| GI_37550111-S | 118    | 141    | 133.9  | LOC377028  | <a href="#">XM_352510.1</a> |
| GI_37550121-S | 95.2   | 84.4   | 94.4   | LOC131572  | <a href="#">XM_067448.2</a> |

|               |        |        |        |           |                             |
|---------------|--------|--------|--------|-----------|-----------------------------|
| GI_37550123-S | 95.6   | 84.2   | 94.8   | LOC339896 | <a href="#">XM 291059.2</a> |
| GI_37550133-S | 98.9   | 90.3   | 88.9   | LOC344682 | <a href="#">XM 293542.3</a> |
| GI_37550135-S | 145.9  | 156.2  | 164.7  | LOC377047 | <a href="#">XM 352512.1</a> |
| GI_37550137-S | 104.2  | 114.6  | 108.9  | LOC377050 | <a href="#">XM 352513.1</a> |
| GI_37550139-S | 118.7  | 137.5  | 135.9  | LOC285405 | <a href="#">XM 210576.3</a> |
| GI_37550143-S | 5599.5 | 7440.9 | 6150   | LOC131691 | <a href="#">XM 067503.2</a> |
| GI_37550145-S | 117.6  | 119.1  | 115.5  | LOC377053 | <a href="#">XM 352514.1</a> |
| GI_37550151-S | 104.1  | 106    | 112.3  | LOC377055 | <a href="#">XM 352516.1</a> |
| GI_37550155-S | 221.2  | 246    | 184.9  | LOC375460 | <a href="#">XM 351626.1</a> |
| GI_37550164-S | 104.8  | 120.3  | 123.1  | LOC255338 | <a href="#">XM 171105.5</a> |
| GI_37550176-S | 128.8  | 211.9  | 150.5  | KIAA1281  | <a href="#">XM 114432.5</a> |
| GI_37550177-S | 170.8  | 215.7  | 203    | LOC153274 | <a href="#">XM 087642.2</a> |
| GI_37550181-S | 223.7  | 247.4  | 225.9  | LOC375465 | <a href="#">XM 351628.1</a> |
| GI_37550185-S | 152.5  | 171.3  | 147.4  | LOC375467 | <a href="#">XM 353380.1</a> |
| GI_37550187-S | 338.8  | 278.6  | 220.3  | LOC375468 | <a href="#">XM 351629.1</a> |
| GI_37550189-S | 169.5  | 120.9  | 114.2  | 8-Sep     | <a href="#">XM 034872.7</a> |
| GI_37550191-S | 208.6  | 302.7  | 259.8  | SEC24A    | <a href="#">XM 094581.4</a> |
| GI_37550193-S | 110.8  | 114.4  | 103    | LOC375469 | <a href="#">XM 353381.1</a> |
| GI_37550195-S | 240.4  | 267    | 235.2  | LOC375470 | <a href="#">XM 353382.1</a> |
| GI_37550197-S | 140.9  | 171    | 171.7  | LOC375471 | <a href="#">XM 353383.1</a> |
| GI_37550199-S | 101    | 112.7  | 110.2  | LOC375472 | <a href="#">XM 353384.1</a> |
| GI_37550208-S | 170.5  | 191.2  | 188    | LOC345754 | <a href="#">XM 293958.2</a> |
| GI_37550226-S | 875.8  | 1072.7 | 731    | LOC377296 | <a href="#">XM 352588.1</a> |
| GI_37550230-S | 196.3  | 232.2  | 212.3  | PRDM6     | <a href="#">XM 049619.6</a> |
| GI_37550242-S | 102.8  | 89.5   | 88.5   | LOC255812 | <a href="#">XM 171032.4</a> |
| GI_37550246-S | 451.4  | 495.8  | 533    | KIAA0794  | <a href="#">XM 087353.6</a> |
| GI_37550254-S | 2132   | 1678.5 | 2183.2 | KIAA0226  | <a href="#">XM 032901.6</a> |
| GI_37550260-S | 93.1   | 92.1   | 82.6   | LOC285253 | <a href="#">XM 210543.4</a> |
| GI_37550262-S | 178.6  | 173.1  | 185    | LOC200933 | <a href="#">XM 117294.5</a> |
| GI_37550263-S | 256.6  | 306.5  | 266.6  | LOC377129 | <a href="#">XM 352540.1</a> |
| GI_37550266-S | 159.6  | 175.3  | 178    | LOC285280 | <a href="#">XM 209550.3</a> |
| GI_37550268-S | 133.4  | 144.5  | 133    | LOC285303 | <a href="#">XM 209559.2</a> |
| GI_37550274-S | 97.4   | 128.5  | 116.9  | LOC345643 | <a href="#">XM 293918.2</a> |
| GI_37550278-S | 235.8  | 275.8  | 293.7  | MAP3K1    | <a href="#">XM 042066.8</a> |
| GI_37550282-S | 156.8  | 158.3  | 136.2  | KIAA1577  | <a href="#">XM 035299.3</a> |
| GI_37550284-S | 211.4  | 276.6  | 243.7  | LOC133995 | <a href="#">XM 059682.2</a> |
| GI_37550302-S | 97.3   | 96.7   | 95.8   | LOC377256 | <a href="#">XM 352576.1</a> |
| GI_37550304-S | 773.1  | 919.2  | 822.6  | LOC345645 | <a href="#">XM 293923.2</a> |
| GI_37550312-S | 116.7  | 135.8  | 106.9  | LOC377262 | <a href="#">XM 352578.1</a> |
| GI_37550314-S | 135.4  | 146.3  | 120.8  | LOC345659 | <a href="#">XM 293927.2</a> |
| GI_37550322-S | 128.7  | 138.9  | 129.5  | LOC374299 | <a href="#">XM 352960.1</a> |
| GI_37550328-S | 92.4   | 93.4   | 109.3  | LOC375439 | <a href="#">XM 351606.1</a> |
| GI_37550334-S | 187.3  | 235.6  | 226.7  | LOC375442 | <a href="#">XM 353370.1</a> |
| GI_37550336-S | 120.2  | 136.7  | 116.5  | LOC345557 | <a href="#">XM 293875.2</a> |

|               |        |        |        |           |                             |          |
|---------------|--------|--------|--------|-----------|-----------------------------|----------|
| GI_37550343-S | 169.3  | 193.1  | 182.6  | LOC375445 | <a href="#">XM_353371.1</a> |          |
| GI_37550351-S | 127.7  | 144.3  | 126.2  | KIAA1999  | <a href="#">XM_114447.5</a> |          |
| GI_37550356-S | 1600.8 | 695.3  | 682.7  | RGNEF     | <a href="#">XM_352962.1</a> |          |
| GI_37550358-S | 269.4  | 227.6  | 230.7  | LOC115548 | <a href="#">XM_291142.3</a> |          |
| GI_37550361-S | 104.5  | 106.6  | 86.5   | KIAA0888  | <a href="#">XM_032571.3</a> |          |
| GI_37550363-S | 94.4   | 90.6   | 91.5   | FLJ40191  | <a href="#">XM_293911.2</a> |          |
| GI_37550371-S | 132.3  | 140.3  | 132.8  | LOC375457 | <a href="#">XM_353374.1</a> |          |
| GI_37550377-S | 106.3  | 120.7  | 120.5  | LOC116068 | <a href="#">XM_351624.1</a> |          |
| GI_37550379-S | 82.7   | 81.3   | 80     | LOC377271 | <a href="#">XM_352582.1</a> |          |
| GI_37550381-S | 102.3  | 109.9  | 100.7  | LOC377272 | <a href="#">XM_352583.1</a> |          |
| GI_37550389-S | 151.8  | 151.2  | 145.9  | LOC377277 | <a href="#">XM_352584.1</a> |          |
| GI_37550391-S | 112.5  | 138.3  | 124.6  | LOC345778 | <a href="#">XM_293971.2</a> |          |
| GI_37550393-S | 2280.5 | 2843.5 | 2275.5 | LOC134478 | <a href="#">XM_068864.5</a> |          |
| GI_37550395-S | 113    | 150.1  | 147.7  | LOC167555 | <a href="#">XM_094565.4</a> |          |
| GI_37550397-S | 149.8  | 164.9  | 153.2  | LOC340120 | <a href="#">XM_293976.3</a> |          |
| GI_37550399-S | 121    | 120.3  | 101.4  | LOC377283 | <a href="#">XM_352585.1</a> |          |
| GI_37550406-S | 99.7   | 115.3  | 125.1  | LOC345462 | <a href="#">XM_293828.2</a> |          |
| GI_37550409-S | 187.5  | 245.7  | 224.9  | LOC285679 | <a href="#">XM_209719.3</a> |          |
| GI_37550411-S | 112.9  | 113    | 101.8  | LOC375485 | <a href="#">XM_351644.1</a> |          |
| GI_37550419-S | 175.6  | 212.1  | 182.3  | LOC285647 | <a href="#">XM_209700.4</a> |          |
| GI_37550421-S | 90.1   | 102.6  | 86.7   | N4BP3     | <a href="#">XM_038920.6</a> |          |
| GI_37550426-S | 196.1  | 239.6  | 210.7  | LOC134082 | <a href="#">XM_068681.4</a> |          |
| GI_37550428-S | 106    | 104.5  | 99.7   | LOC134083 | <a href="#">XM_068682.4</a> |          |
| GI_37550430-S | 107.6  | 103.9  | 98.5   | LOC377336 | <a href="#">XM_352598.1</a> |          |
| GI_37550436-S | 144.1  | 174.2  | 150.2  | LOC285659 | <a href="#">XM_210637.3</a> |          |
| GI_37550443-S | 141.2  | 159    | 137.4  | LOC377266 | <a href="#">XM_352579.1</a> |          |
| GI_37550457-S | 100.3  | 101.3  | 96.2   | LOC253220 | <a href="#">XM_172831.2</a> |          |
| GI_37550459-S | 116.5  | 100.2  | 98     | LOC374329 | <a href="#">XM_352983.1</a> |          |
| GI_37550463-S | 117    | 128.5  | 124.5  | LOC170370 | <a href="#">XM_096317.7</a> |          |
| GI_37550467-S | 299.9  | 360.8  | 326.7  | DRG11     | <a href="#">XM_060970.9</a> |          |
| GI_37550469-S | 81.3   | 81.3   | 78.3   | KIAA1768  | <a href="#">XM_113594.2</a> |          |
| GI_37550480-S | 132.5  | 160.3  | 134.8  | LOC374364 | <a href="#">XM_352997.1</a> |          |
| GI_37550482-S | 162.8  | 164.4  | 132.6  | KIAA1674  | <a href="#">XM_290462.3</a> |          |
| GI_37550488-S | 654.9  | 530.3  | 531.7  | MGC11349  | <a href="#">XM_352951.1</a> | FLJ13861 |
| GI_37550494-S | 122.3  | 131.6  | 128.5  | LOC255025 | <a href="#">XM_173083.4</a> |          |
| GI_37550501-S | 94.5   | 98.4   | 97.2   | LOC344595 | <a href="#">XM_298151.2</a> |          |
| GI_37550503-S | 165.6  | 174.6  | 192.4  | KIAA1000  | <a href="#">XM_036988.9</a> |          |
| GI_37550507-S | 120.6  | 126.2  | 140.3  | TMPRSS7   | <a href="#">XM_293599.3</a> |          |
| GI_37550509-S | 102.7  | 104.3  | 113.7  | LOC285335 | <a href="#">XM_210562.3</a> |          |
| GI_37550513-S | 100.1  | 106.8  | 94.2   | AAT1      | <a href="#">XM_291086.2</a> |          |
| GI_37550514-S | 168    | 160.8  | 177.3  | LOC375362 | <a href="#">XM_353325.1</a> |          |
| GI_37550516-S | 88.2   | 97.8   | 92.7   | LOC116064 | <a href="#">XM_057296.2</a> |          |
| GI_37550518-S | 97.3   | 105.2  | 104.3  | KIAA1006  | <a href="#">XM_045911.7</a> |          |
| GI_37550520-S | 617    | 528.3  | 529.7  | LOC131076 | <a href="#">XM_059492.5</a> |          |



|               |         |        |        |             |                              |                              |          |         |          |
|---------------|---------|--------|--------|-------------|------------------------------|------------------------------|----------|---------|----------|
| GI_37550522-S | 149.1   | 158.9  | 139.7  | SEMA5B      | <a href="#">XM 032249.5</a>  | SemG;SEMAG;FLJ10372;KIAA1445 | receptor | membran | developm |
| GI_37550526-S | 925.9   | 2399.8 | 1004.6 | KIAA1237    | <a href="#">XM 087386.5</a>  |                              |          |         |          |
| GI_37550530-S | 104.5   | 123.6  | 116.6  | LOC375363   | <a href="#">XM 353326.1</a>  |                              |          |         |          |
| GI_37550532-S | 178.5   | 252.1  | 193.2  | LOC200810   | <a href="#">XM 114301.4</a>  |                              |          |         |          |
| GI_37550534-S | 294.4   | 314.9  | 352.8  | TRXR3       | <a href="#">XM 051264.11</a> |                              |          |         |          |
| GI_37550536-S | 250.6   | 246.7  | 243.5  | LOC339122   | <a href="#">XM 290714.2</a>  |                              |          |         |          |
| GI_37550538-S | 300.1   | 325.8  | 262.1  | KIAA0779    | <a href="#">XM 098229.9</a>  |                              |          |         |          |
| GI_37550539-S | 127.5   | 147.8  | 146.2  | LOC285407   | <a href="#">XM 209597.3</a>  |                              |          |         |          |
| GI_37550540-S | 93.4    | 93.7   | 81.7   | LOC339944   | <a href="#">XM 291088.3</a>  |                              |          |         |          |
| GI_37550544-S | 108.4   | 133.3  | 122.8  | LOC375365   | <a href="#">XM 353328.1</a>  |                              |          |         |          |
| GI_37550550-S | 230.4   | 289.4  | 252.9  | CHR3SYT     | <a href="#">XM 291067.2</a>  |                              |          |         |          |
| GI_37550552-S | 232.7   | 263.7  | 254.1  | LOC375366   | <a href="#">XM 353329.1</a>  |                              |          |         |          |
| GI_37550554-S | 612.3   | 565    | 449.6  | FLJ35036    | <a href="#">XM 172341.3</a>  |                              |          |         |          |
| GI_37550558-S | 1247.3  | 880.8  | 859.7  | SR140       | <a href="#">XM 031553.8</a>  |                              |          |         |          |
| GI_37550560-S | 114.6   | 141.3  | 132    | LOC375367   | <a href="#">XM 353330.1</a>  |                              |          |         |          |
| GI_37550566-S | 104     | 104.9  | 95.1   | LOC375370   | <a href="#">XM 351569.1</a>  |                              |          |         |          |
| GI_37550568-S | 168.8   | 183.8  | 152.5  | LOC339899   | <a href="#">XM 295096.2</a>  |                              |          |         |          |
| GI_37550573-S | 132.5   | 136.7  | 132.5  | LOC375371   | <a href="#">XM 353332.1</a>  |                              |          |         |          |
| GI_37550577-S | 115     | 117.4  | 111.5  | LOC375373   | <a href="#">XM 353334.1</a>  |                              |          |         |          |
| GI_37550579-S | 112.4   | 111.1  | 104.6  | LOC375374   | <a href="#">XM 353335.1</a>  |                              |          |         |          |
| GI_37550581-S | 118     | 117.6  | 103.7  | LOC344752   | <a href="#">XM 293577.2</a>  |                              |          |         |          |
| GI_37550583-S | 101.2   | 101    | 92.2   | PGR10       | <a href="#">XM 293580.2</a>  |                              |          |         |          |
| GI_37550591-S | 108.2   | 116.6  | 114.8  | LOC375377   | <a href="#">XM 351571.1</a>  |                              |          |         |          |
| GI_37550593-S | 369     | 364.6  | 322.6  | LOC375378   | <a href="#">XM 353337.1</a>  |                              |          |         |          |
| GI_37550598-S | 99.6    | 94.3   | 96     | LOC344657   | <a href="#">XM 293529.2</a>  |                              |          |         |          |
| GI_37550600-S | 115.2   | 114.6  | 109.6  | KIAA1613    | <a href="#">XM 035946.7</a>  |                              |          |         |          |
| GI_37550602-S | 15942.7 | 11084  | 7777.9 | LOC200916   | <a href="#">XM 114317.6</a>  |                              |          |         |          |
| GI_37550603-S | 95.4    | 107.4  | 99.8   | LOC375380   | <a href="#">XM 351572.1</a>  |                              |          |         |          |
| GI_37550607-S | 94      | 85.4   | 82.1   | DKFZp434A1  | <a href="#">XM 291028.2</a>  |                              |          |         |          |
| GI_37550609-S | 603.8   | 627.5  | 539.9  | ATP11B      | <a href="#">XM 087254.3</a>  |                              |          |         |          |
| GI_37550613-S | 148.3   | 152.7  | 138.1  | LOC285248   | <a href="#">XM 211816.3</a>  |                              |          |         |          |
| GI_37550615-S | 176.6   | 211.9  | 193.2  | LOC375383   | <a href="#">XM 353338.1</a>  |                              |          |         |          |
| GI_37550623-S | 115     | 122.3  | 124.8  | DKFZp76111C | <a href="#">XM 039929.9</a>  |                              |          |         |          |
| GI_37550627-S | 86.9    | 88.4   | 80.9   | LOC254808   | <a href="#">XM 353341.1</a>  |                              |          |         |          |
| GI_37550629-S | 170.6   | 173.4  | 148.3  | LOC200959   | <a href="#">XM 116036.4</a>  |                              |          |         |          |
| GI_37550631-S | 75.3    | 87.9   | 91.9   | LOC377070   | <a href="#">XM 352521.1</a>  |                              |          |         |          |
| GI_37550637-S | 99.3    | 103.4  | 100    | LOC377072   | <a href="#">XM 352522.1</a>  |                              |          |         |          |
| GI_37550647-S | 149.7   | 170.1  | 140.9  | LOC377077   | <a href="#">XM 352525.1</a>  |                              |          |         |          |
| GI_37550657-S | 95.9    | 98.9   | 80.1   | LOC377083   | <a href="#">XM 352528.1</a>  |                              |          |         |          |
| GI_37550663-S | 465.7   | 586.9  | 506.2  | LOC166348   | <a href="#">XM 093813.5</a>  |                              |          |         |          |
| GI_37550669-S | 154.3   | 174    | 162.9  | LOC131873   | <a href="#">XM 067585.8</a>  |                              |          |         |          |
| GI_37550673-S | 176.8   | 231    | 207.5  | LOC377094   | <a href="#">XM 352531.1</a>  |                              |          |         |          |
| GI_37550681-S | 121.2   | 99.2   | 100.8  | LOC377102   | <a href="#">XM 352533.1</a>  |                              |          |         |          |
| GI_37550687-S | 98      | 86.7   | 88.1   | LOC344760   | <a href="#">XM 293581.2</a>  |                              |          |         |          |

|               |         |        |        |           |                             |
|---------------|---------|--------|--------|-----------|-----------------------------|
| GI_37550691-S | 179.7   | 191.1  | 179    | LOC90133  | <a href="#">XM 029323.3</a> |
| GI_37550693-S | 103.8   | 104.1  | 105.6  | LOC131149 | <a href="#">XM 067228.6</a> |
| GI_37550711-S | 101.9   | 115.1  | 107.2  | LOC90113  | <a href="#">XM 291077.2</a> |
| GI_37550713-S | 92.8    | 100.5  | 88.7   | LOC377120 | <a href="#">XM 352537.1</a> |
| GI_37550722-S | 109.1   | 119.4  | 94.9   | LOC377124 | <a href="#">XM 352539.1</a> |
| GI_37550724-S | 304.8   | 380.7  | 337.5  | LOC285388 | <a href="#">XM 208316.2</a> |
| GI_37550761-S | 221.3   | 288.5  | 261.5  | FLJ22529  | <a href="#">XM 352890.1</a> |
| GI_37550763-S | 98.2    | 103.4  | 101.1  | LOC374340 | <a href="#">XM 350795.1</a> |
| GI_37550765-S | 146.2   | 156.9  | 138.6  | PLAC9     | <a href="#">XM 166090.4</a> |
| GI_37550766-S | 245.7   | 298.6  | 264.5  | NRG3      | <a href="#">XM 166086.4</a> |
| GI_37550771-S | 76.1    | 88.6   | 89.4   | KIAA1975  | <a href="#">XM 208476.2</a> |
| GI_37550777-S | 81.9    | 83.5   | 80.5   | LOC374344 | <a href="#">XM 350798.1</a> |
| GI_37550779-S | 145.1   | 153.8  | 150.9  | LOC374345 | <a href="#">XM 352989.1</a> |
| GI_37550783-S | 104.8   | 117.6  | 103.9  | KIAA0608  | <a href="#">XM 051081.9</a> |
| GI_37550785-S | 89.9    | 89.1   | 79     | LOC374347 | <a href="#">XM 352990.1</a> |
| GI_37550787-S | 82.4    | 84.1   | 77.1   | LOC142827 | <a href="#">XM 084357.2</a> |
| GI_37550789-S | 111.8   | 91     | 100.9  | LOC374348 | <a href="#">XM 352991.1</a> |
| GI_37550791-S | 94.7    | 92     | 92.3   | LOC374349 | <a href="#">XM 350800.1</a> |
| GI_37550793-S | 25033.6 | 24444  | 19009  | LOC374351 | <a href="#">XM 350801.1</a> |
| GI_37550797-S | 311.4   | 332.8  | 306    | LOC90271  | <a href="#">XM 030445.6</a> |
| GI_37550803-S | 340.7   | 357    | 410.6  | MGC11279  | <a href="#">XM 350802.1</a> |
| GI_37550805-S | 292.5   | 385.9  | 309.3  | LOC90470  | <a href="#">XM 031975.5</a> |
| GI_37550816-S | 97.7    | 94.5   | 116.5  | LOC374353 | <a href="#">XM 352993.1</a> |
| GI_37550830-S | 213.3   | 222.5  | 220.6  | LOC119548 | <a href="#">XM 058404.4</a> |
| GI_37550831-S | 326.6   | 236.3  | 192.8  | HSPA12A   | <a href="#">XM 048898.5</a> |
| GI_37550839-S | 182.8   | 219.3  | 222.9  | LOC196051 | <a href="#">XM 113641.3</a> |
| GI_37550842-S | 434.5   | 520.3  | 493.3  | LOC374359 | <a href="#">XM 352996.1</a> |
| GI_37550844-S | 150.6   | 161.4  | 148.2  | LOC375914 | <a href="#">XM 351980.1</a> |
| GI_37550861-S | 105.5   | 115.6  | 107.9  | LOC340749 | <a href="#">XM 291698.2</a> |
| GI_37550868-S | 89.1    | 111.5  | 94.8   | LOC118934 | <a href="#">XM 061222.3</a> |
| GI_37550870-S | 101.5   | 105.3  | 95.8   | LOC340654 | <a href="#">XM 291663.2</a> |
| GI_37550872-S | 926.6   | 1429.5 | 1088.5 | LOC375930 | <a href="#">XM 351988.1</a> |
| GI_37550874-S | 119.1   | 121.4  | 115.9  | LOC375931 | <a href="#">XM 351989.1</a> |
| GI_37550882-S | 240.7   | 375    | 322.7  | LOC375936 | <a href="#">XM 351991.1</a> |
| GI_37550888-S | 102.8   | 103    | 95.4   | LOC375939 | <a href="#">XM 351994.1</a> |
| GI_37550959-S | 127     | 151.7  | 127.5  | LOC283029 | <a href="#">XM 210856.2</a> |
| GI_37550961-S | 112.6   | 126.3  | 111    | LOC283034 | <a href="#">XM 210860.2</a> |
| GI_37550963-S | 97.9    | 98.5   | 96     | LOC374319 | <a href="#">XM 352980.1</a> |
| GI_37550967-S | 1545    | 1229.9 | 1363.3 | LOC374320 | <a href="#">XM 350780.1</a> |
| GI_37550975-S | 165.5   | 189.5  | 182    | LOC375887 | <a href="#">XM 351971.1</a> |
| GI_37550984-S | 115.6   | 115.9  | 103.9  | LOC374360 | <a href="#">XM 350808.1</a> |
| GI_37550986-S | 80.7    | 97.7   | 88.6   | LOC374361 | <a href="#">XM 350809.1</a> |
| GI_37550988-S | 212.8   | 257.5  | 246.5  | FLJ32938  | <a href="#">XM 061055.8</a> |
| GI_37551001-S | 235.7   | 278.5  | 217.4  | LOC253436 | <a href="#">XM 172825.5</a> |

|               |       |        |        |            |                             |           |             |
|---------------|-------|--------|--------|------------|-----------------------------|-----------|-------------|
| GI_37551003-S | 78    | 81.1   | 69.5   | LOC340784  | <a href="#">XM 291716.3</a> |           |             |
| GI_37551007-S | 107.4 | 80.9   | 92.8   | LOC375941  | <a href="#">XM 351996.1</a> |           |             |
| GI_37551009-S | 106.8 | 107.4  | 102.9  | LOC119587  | <a href="#">XM 058409.5</a> | carboxype | proteolysis |
| GI_37551016-S | 110.6 | 112.2  | 110.9  | KIAA0217   | <a href="#">XM 040265.6</a> |           |             |
| GI_37551018-S | 90.5  | 92.9   | 82.7   | LOC374305  | <a href="#">XM 350772.1</a> |           |             |
| GI_37551027-S | 191.1 | 225.2  | 215.8  | DKFZP434N1 | <a href="#">XM 166138.5</a> |           |             |
| GI_37551029-S | 2137  | 2246.4 | 2140.9 | LOC221061  | <a href="#">XM 167709.2</a> |           |             |
| GI_37551030-S | 89.5  | 95.4   | 99     | ITGA8      | <a href="#">XM 167711.2</a> |           |             |
| GI_37551032-S | 90.1  | 101.1  | 86     | ST8SIA-VI  | <a href="#">XM 291725.2</a> |           |             |
| GI_37551034-S | 100.3 | 107    | 97.3   | LOC340843  | <a href="#">XM 291726.2</a> |           |             |
| GI_37551040-S | 114.8 | 121.7  | 123    | TAF3       | <a href="#">XM 291729.2</a> |           |             |
| GI_37551046-S | 130.4 | 127.2  | 139.4  | LOC375861  | <a href="#">XM 351961.1</a> |           |             |
| GI_37551048-S | 105.8 | 107.6  | 102.8  | LOC375863  | <a href="#">XM 351962.1</a> |           |             |
| GI_37551050-S | 145.9 | 163.1  | 161    | LOC375866  | <a href="#">XM 351963.1</a> |           |             |
| GI_37551060-S | 86.6  | 106    | 86.3   | LOC375946  | <a href="#">XM 351999.1</a> |           |             |
| GI_37551086-S | 243.4 | 272.1  | 220.5  | DKFZp451A1 | <a href="#">XM 352963.1</a> |           |             |
| GI_37551090-S | 108.1 | 104.8  | 107.8  | LOC375520  | <a href="#">XM 351667.1</a> |           |             |
| GI_37551092-S | 254.8 | 311.8  | 288.5  | LOC375521  | <a href="#">XM 351668.1</a> |           |             |
| GI_37551094-S | 105.4 | 121.4  | 112.4  | LOC375522  | <a href="#">XM 353403.1</a> |           |             |
| GI_37551096-S | 136.5 | 125.5  | 129.7  | LOC375523  | <a href="#">XM 351669.1</a> |           |             |
| GI_37551098-S | 762.6 | 726.1  | 465.8  | AIM1       | <a href="#">XM 166300.2</a> |           |             |
| GI_37551106-S | 127.6 | 147.2  | 128.6  | LOC221261  | <a href="#">XM 168053.4</a> |           |             |
| GI_37551107-S | 115.7 | 111.2  | 106.8  | LOC221262  | <a href="#">XM 168055.3</a> |           |             |
| GI_37551109-S | 97.4  | 108.5  | 88.3   | LOC375525  | <a href="#">XM 353405.1</a> |           |             |
| GI_37551122-S | 101.9 | 95.9   | 89.7   | LOC375527  | <a href="#">XM 351671.1</a> |           |             |
| GI_37551124-S | 203.5 | 173.9  | 135.4  | LOC375528  | <a href="#">XM 351672.1</a> |           |             |
| GI_37551126-S | 105.9 | 98.2   | 99.7   | LOC375529  | <a href="#">XM 351673.1</a> |           |             |
| GI_37551128-S | 127.3 | 134.5  | 122.4  | LOC375530  | <a href="#">XM 351674.1</a> |           |             |
| GI_37551130-S | 236.6 | 296.8  | 225.9  | KIAA1798   | <a href="#">XM 027074.5</a> |           |             |
| GI_37551135-S | 658.8 | 413.9  | 415.4  | LOC375531  | <a href="#">XM 353406.1</a> |           |             |
| GI_37551137-S | 127.5 | 145.8  | 117.5  | LOC345930  | <a href="#">XM 294019.2</a> |           |             |
| GI_37551139-S | 963   | 2060.8 | 1586.5 | PRO2013    | <a href="#">XM 351675.1</a> |           |             |
| GI_37551141-S | 95.9  | 105.4  | 93.1   | LOC340148  | <a href="#">XM 295166.2</a> |           |             |
| GI_37551144-S | 183.4 | 181.9  | 174    | LOC285741  | <a href="#">XM 209741.2</a> |           |             |
| GI_37551146-S | 144.2 | 147.6  | 138.9  | LOC375533  | <a href="#">XM 351677.1</a> |           |             |
| GI_37551148-S | 144.5 | 152.3  | 147.6  | LOC375534  | <a href="#">XM 351678.1</a> |           |             |
| GI_37551150-S | 126   | 123.9  | 139.2  | LOC375535  | <a href="#">XM 353407.1</a> |           |             |
| GI_37551154-S | 102.8 | 115.6  | 89.6   | LOC375537  | <a href="#">XM 353408.1</a> |           |             |
| GI_37551156-S | 140   | 169.3  | 161.1  | LOC375538  | <a href="#">XM 353409.1</a> |           |             |
| GI_37551160-S | 141.8 | 152.1  | 127.7  | KIAA1553   | <a href="#">XM 166320.3</a> |           |             |
| GI_37551186-S | 119   | 151.3  | 127    | LOC340146  | <a href="#">XM 294017.3</a> |           |             |
| GI_37551208-S | 113   | 121.2  | 113.6  | LOC374334  | <a href="#">XM 352985.1</a> |           |             |
| GI_37551214-S | 125.4 | 137.4  | 120.1  | DNA2L      | <a href="#">XM 166103.3</a> |           |             |
| GI_37551218-S | 163.1 | 210.8  | 204.3  | LOC374336  | <a href="#">XM 352986.1</a> |           |             |

|               |        |        |        |            |                             |
|---------------|--------|--------|--------|------------|-----------------------------|
| GI_37551220-S | 530.5  | 833.2  | 725.9  | KIAA0913   | <a href="#">XM_044347.4</a> |
| GI_37551222-S | 150.7  | 167.2  | 164.4  | LOC374337  | <a href="#">XM_352987.1</a> |
| GI_37551224-S | 130.5  | 143.5  | 131.7  | LOC374338  | <a href="#">XM_352988.1</a> |
| GI_37551258-S | 76.5   | 78.4   | 67.5   | LOC375910  | <a href="#">XM_351978.1</a> |
| GI_37551260-S | 111    | 100.6  | 98.3   | LOC338599  | <a href="#">XM_291741.3</a> |
| GI_37551266-S | 152.9  | 193.1  | 151.7  | LOC375911  | <a href="#">XM_351979.1</a> |
| GI_37551273-S | 98.8   | 104.4  | 111.7  | LOC221766  | <a href="#">XM_168101.4</a> |
| GI_37551274-S | 2793.2 | 2138.7 | 1903.5 | LOC375489  | <a href="#">XM_353393.1</a> |
| GI_37551277-S | 96.5   | 99.7   | 94.6   | LOC377339  | <a href="#">XM_352599.1</a> |
| GI_37551279-S | 91.1   | 112.3  | 111.3  | LOC377340  | <a href="#">XM_352600.1</a> |
| GI_37551281-S | 358.7  | 440.6  | 403    | DKFZP434F0 | <a href="#">XM_291159.2</a> |
| GI_37551290-S | 162.5  | 194.7  | 181.3  | LOC340895  | <a href="#">XM_295865.2</a> |
| GI_37551292-S | 115.1  | 108.8  | 106.4  | LOC374306  | <a href="#">XM_352976.1</a> |
| GI_37551300-S | 138    | 153.1  | 148.6  | LOC374308  | <a href="#">XM_350775.1</a> |
| GI_37551306-S | 216.5  | 277.7  | 245.4  | KIAA1462   | <a href="#">XM_166132.2</a> |
| GI_37551308-S | 231.9  | 266    | 251.2  | LOC143110  | <a href="#">XM_083843.4</a> |
| GI_37551310-S | 93.1   | 92.7   | 97.1   | LOC374311  | <a href="#">XM_352978.1</a> |
| GI_37551314-S | 103.4  | 95.3   | 102.4  | LOC340947  | <a href="#">XM_291763.2</a> |
| GI_37551324-S | 101    | 118.2  | 92.9   | LOC220998  | <a href="#">XM_166720.4</a> |
| GI_37551328-S | 82.9   | 90.6   | 83.5   | LOC340900  | <a href="#">XM_291767.2</a> |
| GI_37551330-S | 152.6  | 151.2  | 185    | LOC220213  | <a href="#">XM_166659.3</a> |
| GI_37551334-S | 92.5   | 89     | 76     | LOC375871  | <a href="#">XM_351965.1</a> |
| GI_37551336-S | 106.8  | 105.6  | 96.6   | LOC340913  | <a href="#">XM_291770.3</a> |
| GI_37551346-S | 245.3  | 304.3  | 268.7  | LOC375880  | <a href="#">XM_351967.1</a> |
| GI_37551348-S | 99.2   | 116.3  | 107.2  | ZNF37A     | <a href="#">XM_035863.5</a> |
| GI_37551350-S | 102.3  | 109    | 84.5   | LOC375881  | <a href="#">XM_351968.1</a> |
| GI_37551361-S | 94.4   | 87.7   | 81     | LOC375515  | <a href="#">XM_353401.1</a> |
| GI_37551363-S | 93.7   | 98.4   | 89.1   | LOC154288  | <a href="#">XM_087901.2</a> |
| GI_37551369-S | 94     | 101.7  | 84.4   | LOC375518  | <a href="#">XM_353402.1</a> |
| GI_37551374-S | 90.1   | 88.8   | 88.5   | ZNF292     | <a href="#">XM_048070.2</a> |
| GI_37551378-S | 125.7  | 122.2  | 109.4  | C6orf163   | <a href="#">XM_116497.3</a> |
| GI_37551403-S | 147.3  | 134.3  | 113.6  | ACY1L2     | <a href="#">XM_072402.5</a> |
| GI_37551407-S | 118.4  | 127.2  | 124.5  | LOC374362  | <a href="#">XM_350810.1</a> |
| GI_37551411-S | 174    | 203.6  | 177.4  | LOC338623  | <a href="#">XM_291782.3</a> |
| GI_37551767-S | 1713   | 1805.3 | 2042.5 | KIAA1423   | <a href="#">XM_029703.2</a> |
| GI_37551769-S | 154.7  | 189.3  | 172.4  | LOC375539  | <a href="#">XM_353410.1</a> |
| GI_37551771-S | 109.9  | 112    | 102.7  | LOC375540  | <a href="#">XM_353411.1</a> |
| GI_37551773-S | 92.7   | 91.6   | 77.9   | LOC375541  | <a href="#">XM_353412.1</a> |
| GI_37551775-S | 130.7  | 133    | 132.7  | FNDC1      | <a href="#">XM_027658.6</a> |
| GI_37551783-S | 90.8   | 113.1  | 97.1   | QKI        | <a href="#">XM_037438.6</a> |
| GI_37551868-S | 170.3  | 194.1  | 170.7  | MGC35045   | <a href="#">XM_352924.1</a> |
| GI_37551870-S | 84.5   | 78.4   | 79.8   | LOC374893  | <a href="#">XM_351186.1</a> |
| GI_37551872-S | 349    | 409.6  | 396.9  | LOC342865  | <a href="#">XM_292785.3</a> |
| GI_37551878-S | 106.6  | 116    | 105.7  | LOC374896  | <a href="#">XM_353179.1</a> |

|               |        |       |        |            |                             |                   |
|---------------|--------|-------|--------|------------|-----------------------------|-------------------|
| GI_37551880-S | 114    | 106.8 | 91.2   | FLJ13072   | <a href="#">XM_117117.3</a> |                   |
| GI_37551881-S | 109.7  | 106.4 | 113.8  | LOC126374  | <a href="#">XM_059037.4</a> |                   |
| GI_37551883-S | 101.4  | 110.9 | 94.1   | FLJ30663   | <a href="#">XM_086046.2</a> |                   |
| GI_37551886-S | 126    | 112.8 | 116    | LOC374898  | <a href="#">XM_351188.1</a> |                   |
| GI_37551888-S | 130.2  | 132.7 | 138.8  | LOC342892  | <a href="#">XM_292740.2</a> |                   |
| GI_37551890-S | 185    | 166.8 | 139.1  | LOC374899  | <a href="#">XM_351189.1</a> |                   |
| GI_37551894-S | 107.8  | 99.1  | 100.9  | LOC284409  | <a href="#">XM_211447.2</a> |                   |
| GI_37551895-S | 1831.7 | 1947  | 1640.9 | KIAA0545   | <a href="#">XM_032278.8</a> |                   |
| GI_37551901-S | 170.2  | 182.5 | 145.9  | LOC374902  | <a href="#">XM_353180.1</a> |                   |
| GI_37551903-S | 131.3  | 143.3 | 122.4  | LOC342897  | <a href="#">XM_292745.2</a> |                   |
| GI_37551907-S | 175.9  | 138.7 | 125.2  | KIAA1484   | <a href="#">XM_290842.2</a> |                   |
| GI_37551909-S | 261.7  | 274.4 | 280.2  | FLJ10211   | <a href="#">XM_290820.2</a> |                   |
| GI_37551911-S | 867.7  | 744.7 | 627.5  | CLG        | <a href="#">XM_290828.2</a> | FLJ00018;FLJ22458 |
| GI_37551912-S | 98     | 110.7 | 107.7  | LOC148003  | <a href="#">XM_086001.3</a> |                   |
| GI_37551915-S | 230.8  | 251   | 248.2  | LOC374903  | <a href="#">XM_353181.1</a> |                   |
| GI_37551917-S | 112.6  | 116.9 | 102.7  | LOC163131  | <a href="#">XM_092019.4</a> |                   |
| GI_37551919-S | 102.5  | 104.4 | 97.7   | LOC284323  | <a href="#">XM_209140.3</a> |                   |
| GI_37551924-S | 104.4  | 103.6 | 99     | LOC374908  | <a href="#">XM_353182.1</a> |                   |
| GI_37551930-S | 193.8  | 237.8 | 197.6  | EGFL4      | <a href="#">XM_290821.2</a> |                   |
| GI_37551932-S | 109.6  | 116.5 | 103.4  | LOC374910  | <a href="#">XM_351198.1</a> |                   |
| GI_37551941-S | 208.3  | 238.3 | 249.9  | LOC284347  | <a href="#">XM_209120.4</a> |                   |
| GI_37551946-S | 115.2  | 109.5 | 104.4  | ZNF229     | <a href="#">XM_351202.1</a> |                   |
| GI_37551948-S | 98.1   | 102.3 | 84.9   | LOC147711  | <a href="#">XM_085851.3</a> |                   |
| GI_37551950-S | 149.6  | 198.3 | 153.4  | LOC147710  | <a href="#">XM_097278.4</a> |                   |
| GI_37551951-S | 103.3  | 111.2 | 104.9  | LOC374914  | <a href="#">XM_351203.1</a> |                   |
| GI_37551963-S | 141.8  | 294.1 | 161.4  | LOC374917  | <a href="#">XM_353186.1</a> |                   |
| GI_37551965-S | 279.9  | 357.1 | 318.2  | LOC147920  | <a href="#">XM_085932.6</a> |                   |
| GI_37551969-S | 99.8   | 114.2 | 86.4   | LOC374919  | <a href="#">XM_351206.1</a> |                   |
| GI_37551971-S | 111.9  | 140.6 | 126.8  | MRG2       | <a href="#">XM_085929.8</a> |                   |
| GI_37551979-S | 159.5  | 270.5 | 215    | KIAA1883   | <a href="#">XM_055866.5</a> |                   |
| GI_37551981-S | 470.8  | 575.9 | 516.9  | KIAA1205   | <a href="#">XM_046305.3</a> |                   |
| GI_37551986-S | 109.9  | 108.4 | 111.8  | DKFZp761A1 | <a href="#">XM_292778.2</a> |                   |
| GI_37551988-S | 101.7  | 94.9  | 87     | LOC342918  | <a href="#">XM_292779.3</a> |                   |
| GI_37551990-S | 331    | 655.9 | 380.8  | LOC284367  | <a href="#">XM_290822.2</a> |                   |
| GI_37551992-S | 85.8   | 94.3  | 86.4   | LOC339351  | <a href="#">XM_292784.2</a> |                   |
| GI_37551994-S | 263.7  | 297.8 | 289.1  | LOC147645  | <a href="#">XM_085831.7</a> |                   |
| GI_37551996-S | 149.3  | 191.8 | 165.9  | LOC147650  | <a href="#">XM_085824.5</a> |                   |
| GI_37552000-S | 143    | 160.8 | 147.4  | LOC284371  | <a href="#">XM_209155.2</a> |                   |
| GI_37552006-S | 141    | 145.1 | 127.7  | LOC374923  | <a href="#">XM_351211.1</a> |                   |
| GI_37552008-S | 115.3  | 124.4 | 128.3  | LOC162966  | <a href="#">XM_091888.8</a> |                   |
| GI_37552010-S | 99.6   | 108.7 | 107    | ZNF28      | <a href="#">XM_209154.2</a> |                   |
| GI_37552012-S | 178    | 211.6 | 203.8  | LOC90333   | <a href="#">XM_030958.7</a> |                   |
| GI_37552022-S | 147.6  | 174.7 | 150.2  | LOC284417  | <a href="#">XM_209187.2</a> |                   |
| GI_37552024-S | 151.8  | 220.1 | 258.1  | LOC374926  | <a href="#">XM_351215.1</a> |                   |

|               |       |       |       |            |                             |            |
|---------------|-------|-------|-------|------------|-----------------------------|------------|
| GI_37552028-S | 96.8  | 105.3 | 97.5  | LOC147670  | <a href="#">XM_097265.7</a> |            |
| GI_37552029-S | 117.3 | 120.8 | 129.3 | DKFZp434H0 | <a href="#">XM_064865.4</a> |            |
| GI_37552031-S | 417.8 | 475.1 | 457.4 | ZNF17      | <a href="#">XM_091895.6</a> | HPF3;KOX10 |
| GI_37552033-S | 118.7 | 127.4 | 111.7 | LOC374927  | <a href="#">XM_351216.1</a> |            |
| GI_37552041-S | 121.3 | 135.2 | 125.8 | KIAA1956   | <a href="#">XM_085836.7</a> |            |
| GI_37552048-S | 118.2 | 143   | 128.9 | LOC376511  | <a href="#">XM_352258.1</a> |            |
| GI_37552052-S | 189.8 | 214.7 | 186.4 | LOC126235  | <a href="#">XM_065006.3</a> |            |
| GI_37552056-S | 103   | 107.8 | 101.8 | LOC376514  | <a href="#">XM_352260.1</a> |            |
| GI_37552068-S | 119   | 123   | 116   | LOC376517  | <a href="#">XM_352262.1</a> |            |
| GI_37552072-S | 140.9 | 159.2 | 151.6 | LOC339324  | <a href="#">XM_290838.2</a> |            |
| GI_37552074-S | 113.9 | 131   | 118   | LOC376519  | <a href="#">XM_352263.1</a> |            |
| GI_37552076-S | 98.6  | 98.5  | 93.1  | LOC376520  | <a href="#">XM_352264.1</a> |            |
| GI_37552078-S | 303.9 | 371.8 | 310   | DKFZp434H2 | <a href="#">XM_290829.2</a> |            |
| GI_37552082-S | 408.6 | 520.3 | 450.2 | LOC376527  | <a href="#">XM_352267.1</a> |            |
| GI_37552088-S | 108.2 | 110.2 | 110.1 | LOC376528  | <a href="#">XM_352268.1</a> |            |
| GI_37552090-S | 109.3 | 111.4 | 110.3 | LOC284352  | <a href="#">XM_113978.4</a> |            |
| GI_37552094-S | 168.2 | 184.8 | 178.2 | LOC376532  | <a href="#">XM_352271.1</a> |            |
| GI_37552096-S | 78.5  | 92.4  | 80.6  | LOC339346  | <a href="#">XM_292769.2</a> |            |
| GI_37552098-S | 150.8 | 153.2 | 140.1 | LOC376534  | <a href="#">XM_352272.1</a> |            |
| GI_37552100-S | 89.4  | 92.6  | 85.4  | C19orf7    | <a href="#">XM_028253.3</a> |            |
| GI_37552104-S | 114.8 | 94.2  | 103.9 | LOC376539  | <a href="#">XM_352276.1</a> |            |
| GI_37552115-S | 91.6  | 85.7  | 90.6  | LOC376544  | <a href="#">XM_352279.1</a> |            |
| GI_37552117-S | 94.6  | 95.8  | 93.5  | LOC91664   | <a href="#">XM_039908.2</a> |            |
| GI_37552121-S | 122.6 | 131.7 | 124.7 | LOC89887   | <a href="#">XM_058964.5</a> |            |
| GI_37552125-S | 131   | 134.4 | 117.1 | LOC90485   | <a href="#">XM_032059.2</a> |            |
| GI_37552127-S | 90.8  | 92.7  | 85.5  | LOC342939  | <a href="#">XM_292729.2</a> |            |
| GI_37552135-S | 540.3 | 501.5 | 657.2 | KIFC1      | <a href="#">XM_352965.1</a> |            |
| GI_37552139-S | 112.1 | 126.2 | 108.4 | LOC375491  | <a href="#">XM_351648.1</a> |            |
| GI_37552143-S | 130.3 | 157.2 | 135.2 | LOC375492  | <a href="#">XM_353394.1</a> |            |
| GI_37552147-S | 148.3 | 169.7 | 156.5 | LOC375493  | <a href="#">XM_353395.1</a> |            |
| GI_37552150-S | 393.1 | 415.7 | 310.5 | LOC154165  | <a href="#">XM_087859.4</a> |            |
| GI_37552160-S | 112.3 | 129.6 | 124.9 | LOC346157  | <a href="#">XM_294077.2</a> |            |
| GI_37552162-S | 128.2 | 172.3 | 129   | ZNF311     | <a href="#">XM_212581.2</a> |            |
| GI_37552164-S | 148.6 | 164   | 156   | LOC346171  | <a href="#">XM_294093.2</a> |            |
| GI_37552166-S | 166.2 | 195.5 | 176   | LOC375501  | <a href="#">XM_353396.1</a> |            |
| GI_37552173-S | 117.5 | 129.8 | 126.8 | LOC375502  | <a href="#">XM_351655.1</a> |            |
| GI_37552180-S | 82.7  | 87.3  | 86    | KIAA1246   | <a href="#">XM_166372.2</a> |            |
| GI_37552181-S | 240.4 | 273.4 | 252.3 | LOC221442  | <a href="#">XM_166432.4</a> |            |
| GI_37552185-S | 486.7 | 496   | 391.9 | LOC375506  | <a href="#">XM_351658.1</a> |            |
| GI_37552187-S | 122.6 | 133.1 | 110.1 | LOC375507  | <a href="#">XM_351659.1</a> |            |
| GI_37552191-S | 106.2 | 116.6 | 96.2  | LOC375508  | <a href="#">XM_353398.1</a> |            |
| GI_37552193-S | 121.4 | 110.3 | 108.5 | TTBK1      | <a href="#">XM_166453.4</a> |            |
| GI_37552195-S | 182.7 | 221.7 | 203.7 | LOC375509  | <a href="#">XM_351660.1</a> |            |
| GI_37552197-S | 122.1 | 134.9 | 134   | LOC375510  | <a href="#">XM_353399.1</a> |            |

|               |        |        |        |           |                             |                     |          |                    |
|---------------|--------|--------|--------|-----------|-----------------------------|---------------------|----------|--------------------|
| GI_37552201-S | 211.8  | 214.5  | 171.9  | AARSL     | <a href="#">XM 291190.2</a> | KIAA1270;bA444E17.1 | ATP      | alanyl-            |
| GI_37552205-S | 235.4  | 287    | 260.5  | LOC375511 | <a href="#">XM 351661.1</a> |                     |          |                    |
| GI_37552209-S | 125.8  | 142.7  | 131.6  | LOC375512 | <a href="#">XM 353400.1</a> |                     |          |                    |
| GI_37552211-S | 89.3   | 82.3   | 80.4   | C6orf143  | <a href="#">XM 294139.2</a> |                     |          |                    |
| GI_37552220-S | 104.8  | 107.4  | 103    | IBRDC2    | <a href="#">XM 172581.3</a> | p53RFP;bA528A10.3   | electron | electron           |
| GI_37552234-S | 95.4   | 91.9   | 92.1   | C6orf194  | <a href="#">XM 167149.3</a> |                     |          |                    |
| GI_37552235-S | 94.7   | 100.8  | 104    | ZNF452    | <a href="#">XM 166375.3</a> |                     |          |                    |
| GI_37552272-S | 224.9  | 250.8  | 207.9  | LOC346217 | <a href="#">XM 294117.3</a> |                     |          |                    |
| GI_37552286-S | 80.5   | 67.6   | 82.4   | LOC375542 | <a href="#">XM 353413.1</a> |                     |          |                    |
| GI_37552310-S | 583.1  | 669.9  | 769.2  | LOC91978  | <a href="#">XM 042012.4</a> |                     |          |                    |
| GI_37552312-S | 151    | 180.3  | 119.4  | GRIN3B    | <a href="#">XM 290850.3</a> |                     |          |                    |
| GI_37552316-S | 1249.9 | 1357   | 2298.1 | MIDN      | <a href="#">XM 028067.6</a> |                     |          |                    |
| GI_37552318-S | 128    | 122.5  | 128.8  | LOC339366 | <a href="#">XM 294919.2</a> |                     |          |                    |
| GI_37552320-S | 734.7  | 963.8  | 1023.9 | LOC126435 | <a href="#">XM 059047.4</a> |                     |          |                    |
| GI_37552322-S | 358.9  | 445.5  | 402    | ATP8B3    | <a href="#">XM 086103.4</a> | ATPIK               | ATP      | integral to cation |
| GI_37552328-S | 94.6   | 83.3   | 88     | KIAA1086  | <a href="#">XM 047610.2</a> |                     |          |                    |
| GI_37552330-S | 104.5  | 108.7  | 106    | LOC374873 | <a href="#">XM 353170.1</a> |                     |          |                    |
| GI_37552332-S | 241.5  | 266.4  | 229.8  | KIAA1981  | <a href="#">XM 114000.2</a> |                     |          |                    |
| GI_37552337-S | 113.1  | 125.4  | 124.4  | LOC342959 | <a href="#">XM 292803.2</a> |                     |          |                    |
| GI_37552339-S | 1428   | 1811.3 | 1653.8 | KIAA0876  | <a href="#">XM 290852.2</a> |                     |          |                    |
| GI_37552341-S | 119    | 125.4  | 122.2  | LOC374874 | <a href="#">XM 353171.1</a> |                     |          |                    |
| GI_37552345-S | 237.5  | 200.3  | 229.4  | LOC374876 | <a href="#">XM 353172.1</a> |                     |          |                    |
| GI_37552347-S | 285.8  | 346.9  | 331.6  | GPR108    | <a href="#">XM 290854.2</a> |                     |          |                    |
| GI_37552352-S | 369    | 438.7  | 395.7  | LOC376475 | <a href="#">XM 352236.1</a> |                     |          |                    |
| GI_37552356-S | 199    | 229.1  | 203.9  | KIAA1193  | <a href="#">XM 041843.3</a> |                     | DNA      | nucleus            |
| GI_37552360-S | 104.5  | 87.7   | 83.6   | LOC376480 | <a href="#">XM 352239.1</a> |                     |          |                    |
| GI_37552366-S | 88.4   | 119.7  | 107.8  | KIAA1881  | <a href="#">XM 170901.2</a> |                     |          |                    |
| GI_37552369-S | 119.7  | 130.6  | 117.4  | LOC376483 | <a href="#">XM 352242.1</a> |                     |          |                    |
| GI_37552372-S | 3297.3 | 3080.7 | 4093.9 | KIAA0062  | <a href="#">XM 046677.7</a> |                     |          |                    |
| GI_37552374-S | 164.2  | 180    | 187.3  | LOC375653 | <a href="#">XM 353449.1</a> |                     |          |                    |
| GI_37552376-S | 92.3   | 89.7   | 95.9   | LOC375654 | <a href="#">XM 353450.1</a> |                     |          |                    |
| GI_37552378-S | 119.5  | 121.8  | 118.9  | LOC375655 | <a href="#">XM 353451.1</a> |                     |          |                    |
| GI_37552380-S | 229.6  | 252.2  | 313.1  | CDCA2     | <a href="#">XM 351774.1</a> | FLJ25804            |          |                    |
| GI_37552382-S | 196.9  | 223.9  | 208.7  | LOC375656 | <a href="#">XM 351775.1</a> |                     |          |                    |
| GI_37552384-S | 178.7  | 188.3  | 146.3  | LOC375657 | <a href="#">XM 351776.1</a> |                     |          |                    |
| GI_37552386-S | 106.4  | 106.2  | 97.1   | LOC375658 | <a href="#">XM 353452.1</a> |                     |          |                    |
| GI_37552388-S | 417.3  | 471.9  | 502.2  | LOC203069 | <a href="#">XM 114618.3</a> |                     |          |                    |
| GI_37552390-S | 353.1  | 444.9  | 423.6  | LOC137814 | <a href="#">XM 070619.6</a> |                     |          |                    |
| GI_37552392-S | 112.8  | 120.6  | 123.8  | LOC377637 | <a href="#">XM 352724.1</a> |                     |          |                    |
| GI_37552398-S | 265.6  | 295.1  | 271.8  | LOC346848 | <a href="#">XM 294438.3</a> |                     |          |                    |
| GI_37552401-S | 9760.4 | 4976.8 | 3295   | LOC375662 | <a href="#">XM 351780.1</a> |                     |          |                    |
| GI_37552407-S | 166.4  | 185    | 174.4  | LOC377649 | <a href="#">XM 352730.1</a> |                     |          |                    |
| GI_37552415-S | 325.9  | 416.1  | 327.3  | LOC375684 | <a href="#">XM 353468.1</a> |                     |          |                    |
| GI_37552417-S | 107.5  | 98.6   | 98.2   | LOC375685 | <a href="#">XM 353469.1</a> |                     |          |                    |

|               |        |        |        |             |                             |
|---------------|--------|--------|--------|-------------|-----------------------------|
| GI_37552419-S | 99.4   | 112.2  | 97.3   | LOC286080   | <a href="#">XM 212162.2</a> |
| GI_37552421-S | 507.7  | 556.1  | 592.5  | GRINA       | <a href="#">XM 291268.3</a> |
| GI_37552425-S | 128.2  | 171.3  | 155.4  | OPLAH       | <a href="#">XM 291266.3</a> |
| GI_37552427-S | 109.6  | 108.6  | 101.8  | KIAA1875    | <a href="#">XM 291269.2</a> |
| GI_37552429-S | 93.9   | 83.6   | 89.4   | LOC377707   | <a href="#">XM 352752.1</a> |
| GI_37552431-S | 100.8  | 103.2  | 90.6   | LOC377708   | <a href="#">XM 352753.1</a> |
| GI_37552433-S | 178.5  | 174.8  | 139.9  | LOC377709   | <a href="#">XM 352754.1</a> |
| GI_37552435-S | 197    | 234.9  | 224.1  | LOC377710   | <a href="#">XM 352755.1</a> |
| GI_37552437-S | 97.9   | 112.7  | 108.5  | LOC377711   | <a href="#">XM 352756.1</a> |
| GI_37552442-S | 138.2  | 147.4  | 110.4  | LOC375638   | <a href="#">XM 353442.1</a> |
| GI_37552464-S | 152    | 191.5  | 183.8  | LOC346910   | <a href="#">XM 294456.2</a> |
| GI_37552466-S | 117.2  | 111.7  | 125.2  | LOC377609   | <a href="#">XM 352709.1</a> |
| GI_37552468-S | 110.9  | 146.3  | 120.5  | LOC377610   | <a href="#">XM 352710.1</a> |
| GI_37552470-S | 123.3  | 139    | 126.7  | LOC340372   | <a href="#">XM 294407.2</a> |
| GI_37552472-S | 356.7  | 461.9  | 386.8  | LOC286088   | <a href="#">XM 209893.3</a> |
| GI_37552474-S | 81.7   | 94.3   | 83.5   | LOC377614   | <a href="#">XM 352711.1</a> |
| GI_37552476-S | 128.8  | 126.4  | 125.9  | LOC377616   | <a href="#">XM 352712.1</a> |
| GI_37552478-S | 136.3  | 158.2  | 155    | LOC377618   | <a href="#">XM 352713.1</a> |
| GI_37552480-S | 99.9   | 103.8  | 88.9   | LOC377619   | <a href="#">XM 352714.1</a> |
| GI_37552485-S | 268.4  | 229.7  | 261    | KIAA0870    | <a href="#">XM 088315.4</a> |
| GI_37552486-S | 151.4  | 183.9  | 198    | KIAA1126    | <a href="#">XM 050325.4</a> |
| GI_37552498-S | 119.2  | 129.7  | 116.7  | LOC374879   | <a href="#">XM 351175.1</a> |
| GI_37552500-S | 98.2   | 100.9  | 108.5  | LOC374880   | <a href="#">XM 351176.1</a> |
| GI_37552502-S | 118.1  | 110    | 102.6  | LOC147740   | <a href="#">XM 085870.2</a> |
| GI_37552513-S | 81.1   | 87.5   | 89.5   | LOC342970   | <a href="#">XM 292810.2</a> |
| GI_37552517-S | 87.8   | 89.9   | 82     | DKFZp434116 | <a href="#">XM 032812.2</a> |
| GI_37552519-S | 228.4  | 214.7  | 211.6  | LOC342972   | <a href="#">XM 292813.2</a> |
| GI_37552523-S | 484    | 331.2  | 358.2  | LOC374883   | <a href="#">XM 351179.1</a> |
| GI_37552529-S | 102.2  | 107.8  | 96.9   | LOC342979   | <a href="#">XM 292820.2</a> |
| GI_37552533-S | 226.5  | 252.2  | 264.1  | LOC113230   | <a href="#">XM 053966.7</a> |
| GI_37552537-S | 102.8  | 107.8  | 101.3  | LOC374886   | <a href="#">XM 351181.1</a> |
| GI_37552539-S | 3707.4 | 4928   | 4266.4 | LOC284434   | <a href="#">XM 211460.2</a> |
| GI_37552541-S | 1307.5 | 1670.6 | 1134.6 | SIN3B       | <a href="#">XM 050561.7</a> |
| GI_37552543-S | 102.6  | 96.9   | 89.5   | KIAA1032    | <a href="#">XM 038604.5</a> |
| GI_37552547-S | 148.2  | 220.3  | 230.1  | KIAA0561    | <a href="#">XM 038150.3</a> |
| GI_37552549-S | 139.9  | 149.6  | 143.8  | KIAA1683    | <a href="#">XM 351182.1</a> |
| GI_37552553-S | 827.7  | 795.2  | 868.5  | KIAA0892    | <a href="#">XM 048457.3</a> |
| GI_37552558-S | 99.6   | 111.4  | 106.3  | LOC163233   | <a href="#">XM 290865.2</a> |
| GI_37552560-S | 214.7  | 244.7  | 204.8  | LOC148203   | <a href="#">XM 086095.4</a> |
| GI_37552572-S | 836    | 1071.4 | 913.5  | KIAA1473    | <a href="#">XM 047550.3</a> |
| GI_37552575-S | 227.5  | 282.4  | 245.1  | LOC376486   | <a href="#">XM 352243.1</a> |
| GI_37552580-S | 96.7   | 119.2  | 109.9  | LOC125962   | <a href="#">XM 064883.9</a> |
| GI_37552582-S | 157.9  | 174.4  | 153.7  | MTMR7       | <a href="#">XM 044727.5</a> |
| GI_37552586-S | 103.1  | 103.9  | 92     | LOC375650   | <a href="#">XM 353446.1</a> |



|               |        |        |        |            |                             |                                     |
|---------------|--------|--------|--------|------------|-----------------------------|-------------------------------------|
| GI_37552588-S | 148.8  | 168.6  | 158.7  | LOC125958  | <a href="#">XM 064879.5</a> |                                     |
| GI_37552590-S | 95.6   | 90.2   | 91.7   | LOC375651  | <a href="#">XM 353447.1</a> |                                     |
| GI_37552593-S | 97.9   | 93.5   | 86.7   | LOC375652  | <a href="#">XM 353448.1</a> |                                     |
| GI_37552595-S | 110.9  | 139.2  | 117.9  | LOC342967  | <a href="#">XM 292817.2</a> |                                     |
| GI_37552597-S | 284.7  | 300.7  | 270.8  | LOC342969  | <a href="#">XM 292824.3</a> |                                     |
| GI_37552599-S | 102.2  | 97.3   | 101.7  | LOC346708  | <a href="#">XM 294383.3</a> |                                     |
| GI_37552603-S | 222.4  | 261.9  | 246.6  | LOC377632  | <a href="#">XM 352722.1</a> |                                     |
| GI_37552605-S | 114.5  | 138.4  | 120    | LOC376492  | <a href="#">XM 352247.1</a> |                                     |
| GI_37552609-S | 167.4  | 194.5  | 179.9  | HSZFP36    | <a href="#">XM 290868.2</a> |                                     |
| GI_37552613-S | 171.8  | 178.4  | 164.6  | LOC376494  | <a href="#">XM 352249.1</a> |                                     |
| GI_37552615-S | 149.6  | 157.5  | 153.5  | LOC376495  | <a href="#">XM 352250.1</a> |                                     |
| GI_37552617-S | 134.2  | 139    | 144    | LOC126370  | <a href="#">XM 065050.2</a> |                                     |
| GI_37552625-S | 117.3  | 121.3  | 121.9  | LOC376497  | <a href="#">XM 352251.1</a> |                                     |
| GI_37552629-S | 128.5  | 121    | 111.9  | ZNF90      | <a href="#">XM 352252.1</a> |                                     |
| GI_37552634-S | 150.3  | 161.6  | 147.2  | LOC342991  | <a href="#">XM 292832.3</a> |                                     |
| GI_37552642-S | 75.5   | 105.3  | 87.7   | LOC126502  | <a href="#">XM 065124.5</a> |                                     |
| GI_37552646-S | 99.1   | 107.6  | 101.4  | LOC253342  | <a href="#">XM 171973.3</a> |                                     |
| GI_37552650-S | 77.7   | 96.7   | 88.3   | LOC376507  | <a href="#">XM 352255.1</a> |                                     |
| GI_37552665-S | 2600.3 | 3859.6 | 1485.9 | DKFZp761P0 | <a href="#">XM 291277.2</a> |                                     |
| GI_37552667-S | 135.9  | 154.8  | 139.5  | LOC375645  | <a href="#">XM 353444.1</a> |                                     |
| GI_37552671-S | 95.3   | 86.2   | 86.6   | LOC203076  | <a href="#">XM 114621.3</a> |                                     |
| GI_37552675-S | 111.5  | 129.3  | 113.8  | LOC375647  | <a href="#">XM 353445.1</a> |                                     |
| GI_37552677-S | 129.4  | 140.1  | 120.2  | LOC375648  | <a href="#">XM 351772.1</a> |                                     |
| GI_37552685-S | 156    | 186.9  | 166.7  | LOC377625  | <a href="#">XM 352719.1</a> |                                     |
| GI_37552689-S | 117.6  | 120.5  | 109.8  | LOC377626  | <a href="#">XM 352720.1</a> |                                     |
| GI_37552699-S | 200.5  | 194.9  | 230.9  | KIAA1764   | <a href="#">XM 045086.4</a> |                                     |
| GI_37552850-S | 93.6   | 94     | 84.3   | LOC375104  | <a href="#">XM 353245.1</a> |                                     |
| GI_37552854-S | 152.8  | 161.1  | 171    | KIAA1510   | <a href="#">XM 028834.5</a> | structural microfibril cell         |
| GI_37552857-S | 292.4  | 350.5  | 299.1  | LOC149659  | <a href="#">XM 086622.2</a> |                                     |
| GI_37552860-S | 288.8  | 340.9  | 315.5  | LOC200213  | <a href="#">XM 114156.3</a> |                                     |
| GI_37552864-S | 319.7  | 333.7  | 564.9  | LOC375105  | <a href="#">XM 353246.1</a> |                                     |
| GI_37552867-S | 245.3  | 296.8  | 278.6  | DNAJC5     | <a href="#">XM 028966.7</a> | CSP;FLJ00118;FLJ13070;DKFZP434N1429 |
| GI_37552872-S | 270.8  | 325.6  | 292.5  | LOC376797  | <a href="#">XM 352394.1</a> |                                     |
| GI_37555865-S | 124.4  | 153.8  | 129.4  | LOC340450  | <a href="#">XM 295252.2</a> |                                     |
| GI_37555866-S | 110.8  | 124.5  | 113.3  | LOC375675  | <a href="#">XM 353461.1</a> |                                     |
| GI_37555868-S | 135.9  | 141.6  | 141.2  | LOC375676  | <a href="#">XM 351787.1</a> |                                     |
| GI_37555870-S | 151.5  | 145.2  | 153.1  | LOC286151  | <a href="#">XM 209918.2</a> |                                     |
| GI_37555873-S | 648.2  | 526.3  | 507.8  | LOC346887  | <a href="#">XM 294450.2</a> |                                     |
| GI_37555875-S | 83.2   | 102.2  | 88.6   | COL14A1    | <a href="#">XM 044622.4</a> |                                     |
| GI_37555876-S | 129.2  | 162.8  | 142    | LOC375678  | <a href="#">XM 353462.1</a> |                                     |
| GI_37555878-S | 146.5  | 147.4  | 139.1  | LOC375679  | <a href="#">XM 353463.1</a> |                                     |
| GI_37555887-S | 1604.7 | 1499.9 | 1143.2 | KIAA0143   | <a href="#">XM 035825.4</a> |                                     |
| GI_37555889-S | 399    | 492.4  | 436    | LOC375683  | <a href="#">XM 353467.1</a> |                                     |
| GI_37555891-S | 316.7  | 317    | 281.3  | LOC377678  | <a href="#">XM 352744.1</a> |                                     |

|               |         |       |       |            |                             |               |           |                    |
|---------------|---------|-------|-------|------------|-----------------------------|---------------|-----------|--------------------|
| GI_37555895-S | 134.9   | 138.8 | 133.9 | DKFZp762C1 | <a href="#">XM 095568.6</a> |               |           |                    |
| GI_37555903-S | 123.9   | 126.9 | 116.5 | LOC377685  | <a href="#">XM 352746.1</a> |               |           |                    |
| GI_37555905-S | 111.5   | 118.4 | 107.6 | LOC377686  | <a href="#">XM 352747.1</a> |               |           |                    |
| GI_37555909-S | 84.9    | 89.6  | 82.6  | KCNS2      | <a href="#">XM 043106.4</a> | KV9.2         | voltage-  | voltage- cation    |
| GI_37555914-S | 102.8   | 110.3 | 118.3 | LOC377696  | <a href="#">XM 352749.1</a> |               |           |                    |
| GI_37555920-S | 110.3   | 138.7 | 125.4 | LOC377697  | <a href="#">XM 352750.1</a> |               |           |                    |
| GI_37555922-S | 134.4   | 146.2 | 127.5 | LOC340359  | <a href="#">XM 294387.2</a> |               |           |                    |
| GI_37555926-S | 112     | 116.5 | 119.2 | LOC137202  | <a href="#">XM 070277.5</a> |               |           |                    |
| GI_37555931-S | 95.6    | 118.9 | 96.9  | LOC375096  | <a href="#">XM 351367.1</a> |               |           |                    |
| GI_37555934-S | 1110.3  | 505.1 | 604.3 | LOC375097  | <a href="#">XM 353241.1</a> |               |           |                    |
| GI_37555937-S | 102.9   | 129   | 117   | LOC375098  | <a href="#">XM 351368.1</a> |               |           |                    |
| GI_37555939-S | 403.1   | 466.3 | 440.4 | C20orf142  | <a href="#">XM 351369.1</a> |               |           |                    |
| GI_37555941-S | 86.5    | 83.8  | 83.8  | LOC200226  | <a href="#">XM 114158.2</a> |               |           |                    |
| GI_37555943-S | 202.8   | 193.5 | 266.8 | LOC128499  | <a href="#">XM 059256.5</a> |               |           |                    |
| GI_37555948-S | 410.8   | 555.6 | 638.8 | SLC9A8     | <a href="#">XM 030524.3</a> | NHE8;KIAA0939 | sodium:hy | integral to sodium |
| GI_37555950-S | 135.1   | 136.4 | 124.7 | LOC200230  | <a href="#">XM 114166.3</a> |               |           |                    |
| GI_37555952-S | 83      | 82.6  | 79.4  | PARD6B     | <a href="#">XM 030559.2</a> |               |           |                    |
| GI_37555955-S | 160.4   | 183.1 | 168.1 | C20orf106  | <a href="#">XM 351371.1</a> |               |           |                    |
| GI_37555957-S | 167.5   | 167.5 | 149.7 | LOC375101  | <a href="#">XM 351372.1</a> |               |           |                    |
| GI_37555961-S | 105     | 113.3 | 103.6 | PPP4R1L    | <a href="#">XM 086650.5</a> |               |           |                    |
| GI_37555965-S | 78.7    | 85    | 89.2  | C20orf174  | <a href="#">XM 066058.3</a> |               |           |                    |
| GI_37555969-S | 150.2   | 177.5 | 146.6 | LOC343574  | <a href="#">XM 293104.2</a> |               |           |                    |
| GI_37555971-S | 104.9   | 106.2 | 91.3  | LOC343578  | <a href="#">XM 293123.2</a> |               |           |                    |
| GI_37555973-S | 130.7   | 144.3 | 120.5 | C20orf130  | <a href="#">XM 029741.3</a> |               |           |                    |
| GI_37555975-S | 163     | 176.1 | 154.3 | LOC376788  | <a href="#">XM 352388.1</a> |               |           |                    |
| GI_37555977-S | 105.1   | 116.8 | 108.1 | LOC343593  | <a href="#">XM 293106.2</a> |               |           |                    |
| GI_37555981-S | 113.8   | 115.8 | 111.1 | LOC376793  | <a href="#">XM 352391.1</a> |               |           |                    |
| GI_37555984-S | 83.5    | 85.5  | 84.8  | LOC343629  | <a href="#">XM 293121.2</a> |               |           |                    |
| GI_37555986-S | 321.3   | 418   | 369.5 | LOC376795  | <a href="#">XM 352392.1</a> |               |           |                    |
| GI_37555988-S | 116.2   | 146.4 | 134.8 | LOC128629  | <a href="#">XM 066069.2</a> |               |           |                    |
| GI_37555995-S | 371.1   | 365.4 | 346.7 | KIAA0146   | <a href="#">XM 291253.3</a> |               |           |                    |
| GI_37555997-S | 95.2    | 101   | 113.7 | LOC375663  | <a href="#">XM 353455.1</a> |               |           |                    |
| GI_37555999-S | 123.1   | 134.4 | 139   | LOC375664  | <a href="#">XM 353456.1</a> |               |           |                    |
| GI_37556001-S | 104.8   | 126.5 | 118.2 | LOC157708  | <a href="#">XM 088367.2</a> |               |           |                    |
| GI_37556003-S | 105.7   | 115.3 | 104.5 | LOC375665  | <a href="#">XM 351781.1</a> |               |           |                    |
| GI_37556007-S | 86.2    | 97.2  | 90.7  | LOC375668  | <a href="#">XM 351783.1</a> |               |           |                    |
| GI_37556009-S | 191     | 200.8 | 231.9 | LOC137886  | <a href="#">XM 059929.4</a> |               |           |                    |
| GI_37556011-S | 151.6   | 163.2 | 146.9 | LOC375669  | <a href="#">XM 353458.1</a> |               |           |                    |
| GI_37556013-S | 118.6   | 139.3 | 120.2 | KIAA1416   | <a href="#">XM 098762.9</a> |               |           |                    |
| GI_37556017-S | 114.2   | 116.4 | 109   | LOC375670  | <a href="#">XM 351784.1</a> |               |           |                    |
| GI_37556019-S | 101     | 101.2 | 94.6  | LOC375671  | <a href="#">XM 353459.1</a> |               |           |                    |
| GI_37556021-S | 86.7    | 92.7  | 83.3  | LOC375672  | <a href="#">XM 353460.1</a> |               |           |                    |
| GI_37556023-S | 19793.6 | 18715 | 14196 | LOC157552  | <a href="#">XM 013127.5</a> |               |           |                    |
| GI_37556025-S | 91      | 103.5 | 105.3 | LOC375673  | <a href="#">XM 351785.1</a> |               |           |                    |

|               |        |        |        |           |                             |
|---------------|--------|--------|--------|-----------|-----------------------------|
| GI_37556027-S | 119.8  | 96.1   | 116    | LOC375674 | <a href="#">XM 351786.1</a> |
| GI_37556031-S | 91.8   | 89.8   | 97.8   | LOC377651 | <a href="#">XM 352731.1</a> |
| GI_37556035-S | 440.7  | 439.9  | 328.1  | LOC377653 | <a href="#">XM 352732.1</a> |
| GI_37556037-S | 92.4   | 106.9  | 79.9   | LOC377654 | <a href="#">XM 352733.1</a> |
| GI_37556039-S | 98.8   | 94.1   | 81.3   | LOC377655 | <a href="#">XM 352734.1</a> |
| GI_37556045-S | 99.4   | 96.1   | 98     | LOC377658 | <a href="#">XM 352737.1</a> |
| GI_37556049-S | 108    | 104.7  | 102    | LOC377662 | <a href="#">XM 352738.1</a> |
| GI_37556053-S | 2939   | 2689.8 | 2111.3 | LOC286157 | <a href="#">XM 209920.3</a> |
| GI_37556059-S | 87.5   | 96     | 83.4   | LOC377672 | <a href="#">XM 353538.1</a> |
| GI_37556063-S | 128.7  | 128.2  | 122.4  | LOC377675 | <a href="#">XM 352742.1</a> |
| GI_37556065-S | 376.2  | 471.4  | 418.5  | LOC284759 | <a href="#">XM 209363.2</a> |
| GI_37556067-S | 178.2  | 214.4  | 175.1  | LOC375083 | <a href="#">XM 353235.1</a> |
| GI_37556071-S | 164.5  | 174.5  | 153.3  | LOC375084 | <a href="#">XM 351359.1</a> |
| GI_37556073-S | 166    | 170.8  | 158.7  | C20orf194 | <a href="#">XM 045421.2</a> |
| GI_37556080-S | 120.8  | 118.7  | 126    | LOC128710 | <a href="#">XM 059267.5</a> |
| GI_37556082-S | 95.9   | 98.6   | 83.2   | C20orf50  | <a href="#">XM 046437.4</a> |
| GI_37556084-S | 1845.6 | 1411.4 | 778.6  | LOC375088 | <a href="#">XM 353238.1</a> |
| GI_37556086-S | 117.7  | 113.4  | 103.8  | LOC375089 | <a href="#">XM 353239.1</a> |
| GI_37556088-S | 162.4  | 181.5  | 154.4  | KIAA1272  | <a href="#">XM 046600.9</a> |
| GI_37556090-S | 135    | 154.4  | 153.7  | LOC149913 | <a href="#">XM 097753.4</a> |
| GI_37556092-S | 107.8  | 117.9  | 119.2  | LOC375090 | <a href="#">XM 351361.1</a> |
| GI_37556098-S | 168.5  | 208.7  | 175.3  | LOC376765 | <a href="#">XM 352378.1</a> |
| GI_37556100-S | 116.4  | 128.2  | 117.6  | LOC343637 | <a href="#">XM 297816.3</a> |
| GI_37556106-S | 124    | 135.6  | 132.9  | C20orf82  | <a href="#">XM 097736.4</a> |
| GI_37556110-S | 93.8   | 95.7   | 77.1   | LOC376772 | <a href="#">XM 352381.1</a> |
| GI_37556112-S | 378.9  | 464.8  | 417.2  | LOC376775 | <a href="#">XM 353533.1</a> |
| GI_37556114-S | 99.4   | 99.1   | 109.6  | LOC376777 | <a href="#">XM 352383.1</a> |
| GI_37556116-S | 300.3  | 320.8  | 332.9  | KIAA0725  | <a href="#">XM 291291.2</a> |
| GI_37556129-S | 79.4   | 78.8   | 76.5   | LOC340441 | <a href="#">XM 294480.2</a> |
| GI_37556875-S | 97.8   | 107.9  | 90.3   | LOC375092 | <a href="#">XM 351363.1</a> |
| GI_37556880-S | 179.8  | 207.3  | 202    | LOC375093 | <a href="#">XM 351364.1</a> |
| GI_37556886-S | 286.8  | 372.4  | 346.4  | LOC375094 | <a href="#">XM 351365.1</a> |
| GI_37556892-S | 122.4  | 141.5  | 123    | LOC375095 | <a href="#">XM 351366.1</a> |
| GI_37556898-S | 96.3   | 88.6   | 98.1   | LOC343702 | <a href="#">XM 293160.3</a> |
| GI_37556901-S | 342.6  | 441.5  | 356.6  | LOC376780 | <a href="#">XM 352385.1</a> |
| GI_37558299-S | 100.8  | 97.2   | 97.6   | LOC375110 | <a href="#">XM 353248.1</a> |
| GI_37558305-S | 117.4  | 126.9  | 113.9  | LOC375112 | <a href="#">XM 353250.1</a> |
| GI_37558319-S | 185.8  | 185.2  | 166.4  | LOC375114 | <a href="#">XM 351376.1</a> |
| GI_37558322-S | 174.7  | 187.2  | 172.7  | LOC375115 | <a href="#">XM 353252.1</a> |
| GI_37558325-S | 97     | 102.9  | 90.9   | LOC375116 | <a href="#">XM 353253.1</a> |
| GI_37558330-S | 125    | 133.1  | 118.3  | LOC375117 | <a href="#">XM 353254.1</a> |
| GI_37558992-S | 297.4  | 336.7  | 300.4  | LOC200292 | <a href="#">XM 117213.2</a> |
| GI_37558995-S | 260.4  | 289.4  | 244.4  | LOC375122 | <a href="#">XM 353256.1</a> |
| GI_37559272-S | 105.4  | 103.9  | 97.9   | LOC375118 | <a href="#">XM 351378.1</a> |

|               |        |        |        |           |                             |                        |
|---------------|--------|--------|--------|-----------|-----------------------------|------------------------|
| GI_37559275-S | 126.5  | 121.4  | 141.1  | C21orf25  | <a href="#">XM_032945.4</a> | MGC71445;DKFZP586F0422 |
| GI_37559278-S | 97.6   | 109.1  | 100.9  | LOC375119 | <a href="#">XM_351379.1</a> |                        |
| GI_37559281-S | 162.4  | 180.5  | 166.4  | LOC375120 | <a href="#">XM_353255.1</a> |                        |
| GI_37559466-S | 138.7  | 151.8  | 138.8  | LOC128939 | <a href="#">XM_066243.2</a> |                        |
| GI_37559469-S | 83.3   | 88.9   | 79.9   | LOC376798 | <a href="#">XM_352396.1</a> |                        |
| GI_37559950-S | 655.6  | 760    | 690.3  | MICAL3    | <a href="#">XM_032997.4</a> |                        |
| GI_37559964-S | 104.5  | 109.7  | 100.7  | LOC375128 | <a href="#">XM_353257.1</a> |                        |
| GI_37559973-S | 132.6  | 151.3  | 145    | LOC375131 | <a href="#">XM_353258.1</a> |                        |
| GI_37559987-S | 108.6  | 155.5  | 200.3  | KIAA1666  | <a href="#">XM_351388.1</a> |                        |
| GI_37559996-S | 96.6   | 104.6  | 99.5   | LOC376807 | <a href="#">XM_352399.1</a> |                        |
| GI_37560002-S | 109.8  | 99.2   | 100    | CECR2     | <a href="#">XM_352401.1</a> |                        |
| GI_37560012-S | 97.6   | 104.2  | 92.3   | LOC343830 | <a href="#">XM_293220.3</a> |                        |
| GI_37560015-S | 288.8  | 362.9  | 314.9  | LOC376811 | <a href="#">XM_352403.1</a> |                        |
| GI_37563586-S | 118.5  | 130.4  | 139.7  | LOC375141 | <a href="#">XM_351393.1</a> |                        |
| GI_37563604-S | 1410.6 | 1094.3 | 1065.5 | LOC150223 | <a href="#">XM_097886.5</a> |                        |
| GI_37563608-S | 121.1  | 147.1  | 140.1  | LOC375157 | <a href="#">XM_351406.1</a> |                        |
| GI_37563614-S | 98.9   | 99.8   | 116.8  | LOC129039 | <a href="#">XM_059329.7</a> |                        |
| GI_37563621-S | 138.2  | 170.1  | 149.5  | LOC284890 | <a href="#">XM_208261.2</a> |                        |
| GI_37563628-S | 79.4   | 95.5   | 84.3   | LOC375161 | <a href="#">XM_353263.1</a> |                        |
| GI_37563633-S | 105.1  | 103.1  | 96.2   | KIAA1941  | <a href="#">XM_059318.5</a> |                        |
| GI_37563637-S | 166    | 210    | 178.2  | LOC255349 | <a href="#">XM_170994.2</a> |                        |
| GI_37563645-S | 174.8  | 205.3  | 199.8  | LOC375162 | <a href="#">XM_353264.1</a> |                        |
| GI_37563648-S | 88.4   | 94.9   | 86.3   | LOC375163 | <a href="#">XM_353265.1</a> |                        |
| GI_37563655-S | 193.7  | 237.6  | 230.4  | LOC200312 | <a href="#">XM_117224.6</a> |                        |
| GI_37563661-S | 193.9  | 208.7  | 205.4  | KIAA0542  | <a href="#">XM_038520.7</a> |                        |
| GI_37563666-S | 100    | 93.2   | 87.4   | LOC150297 | <a href="#">XM_086894.3</a> |                        |
| GI_37563669-S | 97.6   | 96.9   | 99.1   | LOC375165 | <a href="#">XM_353266.1</a> |                        |
| GI_37563678-S | 302.6  | 372.4  | 338.7  | KIAA1904  | <a href="#">XM_056282.2</a> |                        |
| GI_37563681-S | 115.9  | 137.1  | 132.3  | LOC375167 | <a href="#">XM_351413.1</a> |                        |
| GI_37563692-S | 111    | 105.3  | 107.6  | LOC200321 | <a href="#">XM_114200.3</a> |                        |
| GI_37563696-S | 143.7  | 137.5  | 126.4  | MGC40042  | <a href="#">XM_351415.1</a> |                        |
| GI_37563699-S | 179.2  | 227.2  | 170.4  | LOC150368 | <a href="#">XM_086826.4</a> |                        |
| GI_37563702-S | 323.6  | 265.1  | 254.1  | LOC375172 | <a href="#">XM_351416.1</a> |                        |
| GI_37563711-S | 130.8  | 97.5   | 216.7  | LOC376816 | <a href="#">XM_352408.1</a> |                        |
| GI_37563726-S | 126.5  | 147.7  | 134.5  | LOC376823 | <a href="#">XM_352411.1</a> |                        |
| GI_37563733-S | 80.1   | 80     | 93.1   | LOC376836 | <a href="#">XM_352422.1</a> |                        |
| GI_37563738-S | 443.3  | 513.7  | 455.9  | KIAA0376  | <a href="#">XM_037759.5</a> |                        |
| GI_37563748-S | 101    | 99.4   | 99.3   | LOC376839 | <a href="#">XM_352423.1</a> |                        |
| GI_37563751-S | 221    | 257.6  | 225.5  | FLJ12747  | <a href="#">XM_290972.2</a> |                        |
| GI_37563764-S | 154.7  | 162.6  | 144.3  | LOC376854 | <a href="#">XM_352428.1</a> |                        |
| GI_37564256-S | 650.7  | 1220.6 | 800.1  | KIAA0930  | <a href="#">XM_047214.6</a> |                        |
| GI_37564508-S | 116.5  | 125    | 113.1  | LOC150383 | <a href="#">XM_086905.5</a> |                        |
| GI_37564513-S | 97.4   | 100.7  | 94.1   | LOC375174 | <a href="#">XM_353270.1</a> |                        |
| GI_37564517-S | 106.6  | 105.3  | 109.6  | LOC375175 | <a href="#">XM_353271.1</a> |                        |

|               |        |        |        |           |                             |                            |              |                        |
|---------------|--------|--------|--------|-----------|-----------------------------|----------------------------|--------------|------------------------|
| GI_37564595-S | 103    | 98.8   | 93.5   | LOC375176 | <a href="#">XM_353272.1</a> |                            |              |                        |
| GI_37564605-S | 108.5  | 123.3  | 107.7  | LOC376856 | <a href="#">XM_352429.1</a> |                            |              |                        |
| GI_37564608-S | 117.3  | 140.2  | 113.5  | LOC376857 | <a href="#">XM_352430.1</a> |                            |              |                        |
| GI_37564791-S | 193.8  | 249.5  | 219.1  | SHANK3    | <a href="#">XM_037493.2</a> |                            |              |                        |
| GI_37564886-S | 148.9  | 146.5  | 136.5  | LOC164714 | <a href="#">XM_104657.3</a> |                            |              |                        |
| GI_37564923-S | 113.8  | 113.6  | 114.4  | LOC284943 | <a href="#">XM_209417.2</a> |                            |              |                        |
| GI_37574041-S | 146.2  | 181.6  | 158    | AGXT2L1   | <a href="#">NM_031279.2</a> |                            | transamin    |                        |
| GI_37574045-S | 291.1  | 303.5  | 290.6  | LOC197336 | <a href="#">NM_145294.3</a> |                            |              |                        |
| GI_37574156-I | 509.9  | 618.3  | 384.2  | ALG2      | <a href="#">NM_197973.1</a> | CDGLi;hALPG2;FLJ14511      |              |                        |
| GI_37574600-S | 332    | 272    | 265.1  | ZNF232    | <a href="#">NM_014519.2</a> |                            | transcripti  | nucleus regulation     |
| GI_37574602-S | 184.8  | 194.8  | 210.1  | ZNF256    | <a href="#">NM_005773.2</a> | BMZF3;BMZF-3               | transcripti  | nucleus developm       |
| GI_37574605-A | 1048.5 | 1042.4 | 798.6  | ZNF198    | <a href="#">NM_197968.1</a> | FIM;MYM;RAMP;SCLL          | protein      |                        |
| GI_37574607-I | 143.2  | 171.6  | 149.8  | ZNF189    | <a href="#">NM_197977.1</a> |                            | transcripti  | nucleus negative       |
| GI_37574611-S | 1580.8 | 1576.6 | 1439.9 | SBF1      | <a href="#">NM_002972.1</a> | MTMR5                      | protein      | integral to protein    |
| GI_37574613-A | 1583.7 | 1846.3 | 1448.8 | NME7      | <a href="#">NM_197972.1</a> |                            | nucleoside-  | GTP                    |
| GI_37574615-S | 92.3   | 96.2   | 83.3   | NUDT12    | <a href="#">NM_031438.2</a> | DKFZP7611172               |              |                        |
| GI_37574617-A | 85.5   | 101.1  | 87.8   | HEMGN     | <a href="#">NM_197978.1</a> | EDAG;EDAG-1                |              |                        |
| GI_37574619-S | 153    | 183.2  | 167.3  | GP6       | <a href="#">NM_016363.3</a> | GPIV;GPVI                  | collagen     | integral to enzyme     |
| GI_37574621-I | 90.3   | 84     | 95.3   | HEMGN     | <a href="#">NM_018437.3</a> | EDAG;EDAG-1                |              |                        |
| GI_37574623-I | 125.6  | 127.3  | 138.1  | BTNL3     | <a href="#">NM_197975.1</a> | BTNLR                      | receptor     | lipid                  |
| GI_37574625-A | 121    | 144.7  | 126.3  | BTNL3     | <a href="#">NM_006707.2</a> | BTNLR                      | receptor     | lipid                  |
| GI_37574625-I | 341.4  | 419.4  | 392    | BTNL3     | <a href="#">NM_006707.2</a> | BTNLR                      | receptor     | lipid                  |
| GI_37574627-A | 321.5  | 442.4  | 308.8  | BTN3A3    | <a href="#">NM_197974.1</a> | BTF3                       |              |                        |
| GI_37574688-S | 109.8  | 120.4  | 105.2  | LOC286101 | <a href="#">XM_209902.2</a> |                            |              |                        |
| GI_37574699-S | 465.3  | 771.4  | 521.1  | LOC92755  | <a href="#">XM_047083.5</a> |                            |              |                        |
| GI_37574707-S | 108.7  | 112    | 100    | LOC377641 | <a href="#">XM_352726.1</a> |                            |              |                        |
| GI_37574713-S | 182.7  | 214.2  | 186.5  | KIAA1543  | <a href="#">XM_048362.7</a> |                            |              |                        |
| GI_37574716-S | 1881.8 | 2263.2 | 2424.4 | TRAPPC5   | <a href="#">XM_058961.4</a> |                            |              |                        |
| GI_37574717-S | 123.2  | 115.7  | 112.4  | LOC374878 | <a href="#">XM_353174.1</a> |                            |              |                        |
| GI_37574725-I | 112.7  | 113.1  | 118.8  | BID       | <a href="#">NM_197966.1</a> | MGC15319;MGC42355          | death        | cytosol apoptotic      |
| GI_37574727-A | 832.9  | 733.9  | 435.2  | BID       | <a href="#">NM_197967.1</a> | MGC15319;MGC42355          | death        | cytosol apoptotic      |
| GI_37574729-I | 123    | 125.7  | 128.3  | BOLL      | <a href="#">NM_033030.3</a> | BOULE                      | nucleic      |                        |
| GI_37574730-A | 115.1  | 127.8  | 116.9  | BOLL      | <a href="#">NM_197970.1</a> | BOULE                      | nucleic      |                        |
| GI_37574730-I | 97.8   | 96.6   | 83.3   | BOLL      | <a href="#">NM_197970.1</a> | BOULE                      | nucleic      |                        |
| GI_37577088-I | 101.3  | 100.3  | 95.7   | DPP8      | <a href="#">NM_197960.1</a> | FLJ14920;FLJ20283;MGC26191 |              |                        |
| GI_37577092-A | 923    | 1264.6 | 1139.4 | DPP8      | <a href="#">NM_017743.3</a> | FLJ14920;FLJ20283;MGC26191 |              |                        |
| GI_37577100-A | 779.1  | 393.8  | 459.4  | DTNB      | <a href="#">NM_033148.2</a> | MGC17163;MGC57126          | protein      | cytoskelet             |
| GI_37577102-S | 194.8  | 256.6  | 217.2  | CLEC1     | <a href="#">NM_016511.2</a> | MGC34328                   | transmem     | intracellula defense   |
| GI_37577106-S | 115.9  | 116.2  | 117.3  | CLECSF2   | <a href="#">NM_005127.2</a> | AICL;IFNRG1;HP10085        | lectin [goid | integral to antimicrob |
| GI_37577111-A | 168.3  | 196.5  | 153.5  | PAX8      | <a href="#">NM_013992.2</a> |                            | thyroid-     | nucleus embryoge       |
| GI_37577112-I | 247.8  | 316.2  | 269.5  | PAX8      | <a href="#">NM_003466.2</a> |                            | thyroid-     | nucleus embryoge       |
| GI_37577116-A | 120.5  | 162.2  | 113.1  | CLECSF6   | <a href="#">NM_194448.1</a> | DCIR;LLIR;DDB27;HDCGC13P   | transmem     | integral to cell       |
| GI_37577120-S | 79.1   | 88     | 71.2   | CLECSF8   | <a href="#">NM_080387.4</a> | Mpcl;CLEC-6;MGC40078       | sugar        | heterophili            |
| GI_37577121-I | 752    | 581.5  | 962.7  | UBE2J1    | <a href="#">NM_016021.2</a> | Ubc6p;CGI-                 | ubiquitin    | ubiquitin              |

|               |        |        |        |           |                             |                                     |             |              |            |
|---------------|--------|--------|--------|-----------|-----------------------------|-------------------------------------|-------------|--------------|------------|
| GI_37577127-I | 154.8  | 181.6  | 152.3  | UBE2J2    | <a href="#">NM_194316.1</a> | NCUBE2;PRO2121                      |             |              |            |
| GI_37577129-A | 393.6  | 452.4  | 416.1  | UBE2J2    | <a href="#">NM_194457.1</a> | NCUBE2;PRO2121                      |             |              |            |
| GI_37577131-I | 127.3  | 142.9  | 110.7  | UBE2J2    | <a href="#">NM_194458.1</a> | NCUBE2;PRO2121                      |             |              |            |
| GI_37577133-S | 2325.7 | 2630.2 | 2239.5 | UBE2M     | <a href="#">NM_003969.2</a> | UBC12;hUbc12;UBC-RS2                | ubiquitin   |              | protein    |
| GI_37577134-S | 911.7  | 1027.1 | 1038.1 | UBE2N     | <a href="#">NM_003348.3</a> | UBC13;MGC8489;UbcH-ben              | ubiquitin   |              | regulation |
| GI_37577141-A | 168.2  | 185.4  | 170.9  | MAX       | <a href="#">NM_197957.1</a> | MGC10775;MGC11225;MGC18164;MGC346   | transcripti |              | oncogene   |
| GI_37577141-I | 176.6  | 210.5  | 196.2  | MAX       | <a href="#">NM_197957.1</a> | MGC10775;MGC11225;MGC18164;MGC346   | transcripti |              | oncogene   |
| GI_37577147-A | 394.1  | 427.2  | 368.8  | NCKIPSD   | <a href="#">NM_184231.1</a> | DIP1;ORF1;WISH;AF3P21;SPIN90;WASLBP | cytoskelet  | intermedia   | NLS-       |
| GI_37577150-S | 442.7  | 516.4  | 507.4  | APEG1     | <a href="#">NM_005876.3</a> | SPEG;KIAA1297;MGC12676              | ATP         | nucleus      | negative   |
| GI_37577152-S | 104.3  | 119.2  | 93.8   | ATP1A4    | <a href="#">NM_144699.1</a> | ATP1AL2;MGC25056                    | monovale    | integral to  | sodium     |
| GI_37577154-S | 1087.2 | 1406.3 | 1728.3 | ATP6AP1   | <a href="#">NM_001183.3</a> | 16A;CF2;ORF;Ac45;XAP3;XAP-          | adenosine   | vacuolar     | proton     |
| GI_37577155-S | 156.4  | 148.4  | 154.2  | CA5B      | <a href="#">NM_007220.2</a> | MGC39962                            | carbonate   | mitochond    | one-       |
| GI_37577156-S | 131.3  | 134.8  | 100.7  | CAPN5     | <a href="#">NM_004055.3</a> | HTRA3;nCL-3                         | calpain     | intracellula | signal     |
| GI_37577158-S | 106.9  | 124.9  | 100.5  | CASR      | <a href="#">NM_000388.2</a> | FHH;HHC;HHC1;NSHPT;PCAR1;GPRC2A     | G-protein   | integral to  | calcium    |
| GI_37577160-S | 89.5   | 97.4   | 82.1   | CCBP2     | <a href="#">NM_001296.3</a> | D6;CCR9;CCR10;CMKBR9                | chemokine   | integral to  | chemotaxi  |
| GI_37577161-I | 102    | 101    | 122.4  | EPIM      | <a href="#">NM_194356.1</a> | STX2A;STX2B;STX2C;MGC51014          | protein     | microsom     | ectoderm   |
| GI_37577163-A | 211.7  | 149.7  | 139.9  | LIAS      | <a href="#">NM_194451.1</a> | LAS;LIP1;HUSSY-01;MGC23245          | lipoate     | mitochond    | lipoate    |
| GI_37577165-I | 425.3  | 310    | 247.7  | LIAS      | <a href="#">NM_006859.2</a> | LAS;LIP1;HUSSY-01;MGC23245          | lipoate     | mitochond    | lipoate    |
| GI_37577167-S | 357.1  | 294.1  | 336.9  | LOC345667 | <a href="#">NM_197941.1</a> |                                     |             |              |            |
| GI_37577171-A | 136.2  | 163    | 134.3  | RNASE4    | <a href="#">NM_194431.1</a> | RNS4;MGC9306                        | pancreatic  | cellular_co  | mRNA       |
| GI_37577171-I | 117.3  | 130.2  | 119.9  | RNASE4    | <a href="#">NM_194431.1</a> | RNS4;MGC9306                        | pancreatic  | cellular_co  | mRNA       |
| GI_37577182-A | 730.4  | 816.9  | 586    | RNF38     | <a href="#">NM_194331.1</a> | FLJ21343                            |             |              |            |
| GI_37577286-A | 549.5  | 595.1  | 619.2  | EPIM      | <a href="#">NM_001980.2</a> | STX2A;STX2B;STX2C;MGC51014          | protein     | microsom     | ectoderm   |
| GI_37588847-I | 235.3  | 237    | 170.8  | VAPA      | <a href="#">NM_003574.4</a> | VAP-A;VAP33;VAP-33;MGC3745;hVAP-33  | structural  | kinesin      | membran    |
| GI_37588849-A | 138.1  | 139    | 131    | VAPA      | <a href="#">NM_194434.1</a> | VAP-A;VAP33;VAP-33;MGC3745;hVAP-33  | structural  | kinesin      | membran    |
| GI_37588852-A | 523.6  | 201    | 209    | VIP       | <a href="#">NM_194435.1</a> | PHM27;MGC13587                      | neuropepti  | soluble      | positive   |
| GI_37588854-A | 818.4  | 895.5  | 987.5  | RNF40     | <a href="#">NM_014771.2</a> | BRE1B;RBP95;STARING;KIAA0661;MGC13  |             |              |            |
| GI_37588855-I | 106.8  | 113.3  | 126.5  | RNF40     | <a href="#">NM_194352.1</a> | BRE1B;RBP95;STARING;KIAA0661;MGC13  |             |              |            |
| GI_37588858-I | 125.4  | 134.1  | 138.5  | RNF41     | <a href="#">NM_194358.1</a> | SBBI03;MGC45228                     |             |              |            |
| GI_37588860-A | 509    | 465.3  | 478    | RNF41     | <a href="#">NM_194359.1</a> | SBBI03;MGC45228                     |             |              |            |
| GI_37588864-A | 739.9  | 860.8  | 889.1  | RNF121    | <a href="#">NM_194452.1</a> | FLJ11099                            |             |              |            |
| GI_37588868-S | 569.7  | 768.4  | 701.6  | RNF123    | <a href="#">NM_022064.2</a> | FLJ12565                            |             |              |            |
| GI_37588870-A | 141.2  | 212.9  | 160.5  | RNF128    | <a href="#">NM_024539.3</a> | GRAIL;FLJ23516                      |             |              |            |
| GI_37588870-I | 102.2  | 112    | 90.1   | RNF128    | <a href="#">NM_024539.3</a> | GRAIL;FLJ23516                      |             |              |            |
| GI_37588872-I | 108.5  | 126.8  | 110.7  | RNF128    | <a href="#">NM_194463.1</a> | GRAIL;FLJ23516                      |             |              |            |
| GI_37594438-S | 355.9  | 535.5  | 587.4  | ZNF175    | <a href="#">NM_007147.2</a> | OTK18                               | transcripti | nucleus      | regulation |
| GI_37594439-S | 2070.1 | 2468.4 | 2361.4 | ZNHIT1    | <a href="#">NM_006349.2</a> | CG11;ZNFN4A1                        | cyclin-     |              |            |
| GI_37594440-S | 254.9  | 294.7  | 267.8  | ZNF136    | <a href="#">NM_003437.2</a> | pHZ-20                              | transcripti | nucleus      | negative   |
| GI_37594441-S | 188.8  | 199    | 167.7  | ZNF140    | <a href="#">NM_003440.2</a> | pHZ-39                              | transcripti | nucleus      | regulation |
| GI_37594443-S | 180.2  | 222    | 191.2  | ZMYND10   | <a href="#">NM_015896.2</a> | BLU;FLU                             |             |              |            |
| GI_37594445-S | 555.8  | 571.2  | 656    | ZMYND19   | <a href="#">NM_138462.2</a> | MIZIP                               |             |              |            |
| GI_37594446-A | 909    | 1096.5 | 1180   | ZDHHC16   | <a href="#">NM_198045.1</a> | APH2;MGC2993                        |             |              |            |
| GI_37594448-I | 152.4  | 157.5  | 165.6  | ZDHHC16   | <a href="#">NM_198046.1</a> | APH2;MGC2993                        |             |              |            |
| GI_37594456-A | 1055   | 1061.6 | 1086.2 | NUDT9     | <a href="#">NM_198038.1</a> | NUDT10;MGC3037                      | calcium     | intracellula | cation     |

|               |        |        |        |          |                             |                                        |             |              |               |
|---------------|--------|--------|--------|----------|-----------------------------|----------------------------------------|-------------|--------------|---------------|
| GI_37594460-A | 352.2  | 368.5  | 295    | NUDT6    | <a href="#">NM_198041.1</a> | gfg;bFGF;FGF-2;gfg-1;ASF2;FGF-         | growth      | cellular_co  | biological_   |
| GI_37594460-I | 441.8  | 573.1  | 493.7  | NUDT6    | <a href="#">NM_198041.1</a> | gfg;bFGF;FGF-2;gfg-1;ASF2;FGF-         | growth      | cellular_co  | biological_   |
| GI_37594463-S | 2870.1 | 3346.5 | 3273   | NUDT5    | <a href="#">NM_014142.2</a> | YSA1H;hYSAH1                           | protein     | intracellula | ADP           |
| GI_37594465-I | 227.8  | 237.8  | 193.2  | NUDT6    | <a href="#">NM_007083.3</a> | gfg;bFGF;FGF-2;gfg-1;ASF2;FGF-         | growth      | cellular_co  | biological_   |
| GI_37594466-S | 794.9  | 860.7  | 1323   | NUDT14   | <a href="#">NM_177533.2</a> | UGPP                                   |             |              |               |
| GI_37594468-A | 435    | 552    | 627.5  | HIBCH    | <a href="#">NM_198047.1</a> | HIBYL-COA-H                            | 3-          |              | metabolis     |
| GI_37595527-I | 162.2  | 174.6  | 177.5  | PHC2     | <a href="#">NM_198040.1</a> | EDR2;HPH2                              | protein     | nucleus      |               |
| GI_37595529-A | 2373.7 | 2048.6 | 2129.8 | PHC2     | <a href="#">NM_004427.2</a> | EDR2;HPH2                              | protein     | nucleus      |               |
| GI_37595529-I | 154.4  | 155    | 135.3  | PHC2     | <a href="#">NM_004427.2</a> | EDR2;HPH2                              | protein     | nucleus      |               |
| GI_37595531-I | 125    | 144.5  | 129.9  | PHEMX    | <a href="#">NM_139022.2</a> | PHMX;TSSC6;MGC22455                    | tumor       | integral to  | biological_   |
| GI_37595532-A | 582.1  | 749.8  | 566.1  | PHEMX    | <a href="#">NM_139024.2</a> | PHMX;TSSC6;MGC22455                    | tumor       | integral to  | biological_   |
| GI_37595534-S | 364.3  | 457.9  | 510.5  | RNF103   | <a href="#">NM_005667.2</a> | KF1;hkf-1;ZFP103;MGC41857              |             |              | central       |
| GI_37595535-S | 341.6  | 395.7  | 376.7  | RNF32    | <a href="#">NM_030936.2</a> | FKSG33;DKFZp434C135                    |             |              |               |
| GI_37595536-A | 2029.7 | 2210.6 | 2089   | RNF34    | <a href="#">NM_025126.2</a> | RFI;RIFF;FLJ21786                      | electron    |              | electron      |
| GI_37595538-I | 100.2  | 117.2  | 126.2  | RNF34    | <a href="#">NM_194271.1</a> | RFI;RIFF;FLJ21786                      | electron    |              | electron      |
| GI_37595540-A | 113.4  | 125.3  | 110    | RNF36    | <a href="#">NM_080745.2</a> | Trif                                   |             |              |               |
| GI_37595542-I | 119.6  | 134.1  | 120.4  | RNF36    | <a href="#">NM_182985.2</a> | Trif                                   |             |              |               |
| GI_37595544-S | 971.5  | 570.6  | 416.4  | PCTK2    | <a href="#">NM_002595.2</a> | PCTAIRE2                               | protein     |              | protein       |
| GI_37595546-S | 131.8  | 177.1  | 142.4  | PDK1     | <a href="#">NM_002610.3</a> |                                        | [pyruvate   | mitochond    | small         |
| GI_37595547-S | 130.3  | 159.9  | 147.7  | PEPP3    | <a href="#">NM_014935.2</a> | KIAA0969                               |             |              |               |
| GI_37595549-I | 182.5  | 229.2  | 197.5  | PKNOX1   | <a href="#">NM_004571.3</a> | PREP1                                  | specific    |              |               |
| GI_37595550-A | 325.2  | 354.4  | 308.2  | PKNOX1   | <a href="#">NM_197976.1</a> | PREP1                                  | specific    |              |               |
| GI_37595552-S | 160.3  | 169.6  | 157.6  | RNF111   | <a href="#">NM_017610.6</a> | ARK;FLJ38008;DKFZp761D081;DKFZp313E    |             |              |               |
| GI_37595554-S | 101.1  | 91.1   | 90.8   | RNF125   | <a href="#">NM_017831.2</a> | FLJ20456;MGC21737                      |             |              |               |
| GI_37595556-S | 522.8  | 763.4  | 751.4  | ATP1B1   | <a href="#">NM_001677.2</a> | ATP1B                                  | sodium/po   | sodium/po    | small         |
| GI_37595557-I | 248.4  | 259.7  | 178.7  | BTN3A1   | <a href="#">NM_007048.3</a> | BTF5;BT3.1                             |             |              | lipid         |
| GI_37595559-S | 94.1   | 114.5  | 94     | DNALI1   | <a href="#">NM_003462.3</a> | P28;hp28                               | axonemal    | axonemal     | fertilization |
| GI_37595561-S | 292.4  | 366.9  | 334.3  | NFATC4   | <a href="#">NM_004554.3</a> | NFAT3;NF-ATc4                          | transcripti | nucleus      | transcripti   |
| GI_37595562-S | 263.3  | 299.3  | 294.2  | OLR1     | <a href="#">NM_002543.2</a> | LOX1;SCARE1                            | LDL         | membran      | proteolysis   |
| GI_37595563-A | 190.8  | 249.5  | 221.6  | CD3Z     | <a href="#">NM_000734.2</a> | CD3H;CD3Q;TCRZ;CD3-ZETA                | T-cell      | integral to  | cellular      |
| GI_37595566-S | 3651.1 | 2968.1 | 2844.1 | RNF110   | <a href="#">NM_007144.2</a> | MEL-18;ZNF144;MGC10545                 | transcripti | nucleus      | regulation    |
| GI_37595567-S | 91.5   | 130.5  | 92.4   | SALL4    | <a href="#">NM_020436.2</a> | DRRS;HSAL4;dJ1112F19.1                 | DNA         | nucleus      | regulation    |
| GI_37595568-S | 6338.3 | 4380.8 | 3623.2 | SCGF     | <a href="#">NM_002975.2</a> | P47;LSLCL;CLECSF3                      | stem cell   | extracellul  | positive      |
| GI_37595749-I | 112.9  | 130.8  | 118.5  | LBR      | <a href="#">NM_002296.2</a> | PHA;LMN2R;MGC9041;PRO0650              | lamin/chro  | integral to  |               |
| GI_37595751-A | 2850.8 | 2458   | 2917.7 | LBR      | <a href="#">NM_194442.1</a> | PHA;LMN2R;MGC9041;PRO0650              | lamin/chro  | integral to  |               |
| GI_37595751-I | 92.8   | 100.6  | 105.9  | LBR      | <a href="#">NM_194442.1</a> | PHA;LMN2R;MGC9041;PRO0650              | lamin/chro  | integral to  |               |
| GI_37595753-I | 122.5  | 121.6  | 108.5  | LDHD     | <a href="#">NM_153486.2</a> | MGC57726                               |             |              | electron      |
| GI_37595755-A | 177.4  | 207    | 194.4  | LDHD     | <a href="#">NM_194436.1</a> | MGC57726                               |             |              | electron      |
| GI_37596296-S | 195.4  | 226.3  | 190.3  | CDKL1    | <a href="#">NM_004196.3</a> | p42;KKIALRE                            | cyclin-     |              | protein       |
| GI_37596298-S | 234.8  | 276.1  | 243.6  | HOXA2    | <a href="#">NM_006735.3</a> |                                        | transcripti | nucleus      | regulation    |
| GI_37620158-S | 187.6  | 194.7  | 236.2  | KIAA0625 | <a href="#">NM_015046.4</a> | AOA2;SETX;SCAR1                        |             |              |               |
| GI_37620162-I | 267.4  | 343.9  | 260.3  | MASK     | <a href="#">NM_020690.3</a> | FLJ10042;FLJ11979;FLJ14127;FLJ20288;KI |             |              |               |
| GI_37620164-S | 1466.3 | 1062.8 | 1032.2 | FLJ20360 | <a href="#">NM_017782.2</a> |                                        |             |              |               |
| GI_37620168-S | 111    | 119.4  | 109.9  | GPR126   | <a href="#">NM_020455.3</a> | VIGR;FLJ14937;DKFZp564D0462            | G-protein   | membran      | neuropepti    |

|               |        |        |        |            |                             |                                  |              |                         |
|---------------|--------|--------|--------|------------|-----------------------------|----------------------------------|--------------|-------------------------|
| GI_37620170-S | 194.4  | 160    | 130.5  | AKNA       | <a href="#">NM_030767.2</a> |                                  |              |                         |
| GI_37620172-S | 91.5   | 93.4   | 88.1   | FLJ11457   | <a href="#">NM_024753.2</a> |                                  |              |                         |
| GI_37620174-S | 112    | 119.6  | 109.9  | CMYA3      | <a href="#">NM_152381.2</a> |                                  |              |                         |
| GI_37620176-I | 145    | 146.3  | 153.5  | EB-1       | <a href="#">NM_152788.2</a> | AIDA;MGC26087                    |              |                         |
| GI_37620180-S | 451.1  | 517.4  | 434.3  | DKFZP564GC | <a href="#">NM_015601.2</a> | KIAA1593                         | ubiquitin-   | intracellula ubiquitin  |
| GI_37620203-S | 219.6  | 254.3  | 246.3  | OR2C3      | <a href="#">NM_198074.1</a> | OR2C4;OR2C5P;OST742              | olfactory    | integral to perception  |
| GI_37620205-S | 1282.9 | 1255.1 | 1040.2 | gm117      | <a href="#">NM_198077.1</a> |                                  |              |                         |
| GI_37620211-S | 81.3   | 89.3   | 86.4   | SCML4      | <a href="#">NM_198081.1</a> | dJ47M23.1                        |              |                         |
| GI_37620213-S | 106.9  | 127.1  | 119.2  | C21orf121  | <a href="#">NM_198078.1</a> | PRED87                           |              |                         |
| GI_37620215-S | 1635.5 | 2008.4 | 1539.4 | LOC253827  | <a href="#">NM_198080.1</a> |                                  |              |                         |
| GI_37620217-S | 120.9  | 142.5  | 137    | LOC284001  | <a href="#">NM_198082.1</a> |                                  |              |                         |
| GI_37622340-I | 112    | 111.5  | 106.4  | ZNF42      | <a href="#">NM_198055.1</a> | MZF1;MZF-1;MZF1B                 | transcripti  | nucleus regulation      |
| GI_37622342-A | 891.8  | 1123   | 847.4  | ZNF266     | <a href="#">NM_198058.1</a> | HZF1                             | DNA          | nucleus developm        |
| GI_37622344-A | 689.8  | 850.5  | 815.3  | ZNF42      | <a href="#">NM_003422.2</a> | MZF1;MZF-1;MZF1B                 | transcripti  | nucleus regulation      |
| GI_37622348-I | 111.6  | 110.3  | 94.9   | ZNF266     | <a href="#">NM_006631.2</a> | HZF1                             | DNA          | nucleus developm        |
| GI_37622350-S | 814.2  | 988.8  | 831.8  | NUDT3      | <a href="#">NM_006703.2</a> | DIPP                             | diphospho    | diadenosi               |
| GI_37622351-S | 162.5  | 157.9  | 149.6  | ITLN2      | <a href="#">NM_080878.2</a> | HL-2                             | lectin [goid | heterophili             |
| GI_37622352-S | 114.7  | 157.7  | 105.6  | NME5       | <a href="#">NM_003551.2</a> | NM23H5;NM23-H5                   | nucleoside   | cellular_co nucleoside  |
| GI_37622353-S | 1799.4 | 1084.7 | 214.2  | INHBE      | <a href="#">NM_031479.3</a> | MGC4638;activin                  | hormone      | extracellul cell growth |
| GI_37622354-S | 411.2  | 586    | 423.9  | BLZF1      | <a href="#">NM_003666.2</a> | JEM1;JEM-1;GOLGIN-45             | RNA          | nucleus regulation      |
| GI_37622886-A | 1070.8 | 1199.3 | 1261.5 | CES2       | <a href="#">NM_198061.1</a> | iCE;CE-2                         | carboxyles   | endoplas catabolis      |
| GI_37622888-S | 1108.9 | 1300.9 | 1215.7 | CHP        | <a href="#">NM_007236.3</a> | SLC9A1BP                         | potassium    | small                   |
| GI_37622889-A | 93     | 111.3  | 97.5   | PLAGL1     | <a href="#">NM_002656.2</a> | ZAC;LOT1;ZAC1                    | tumor        | induction               |
| GI_37622891-A | 1309.4 | 1106.2 | 987    | RNF126     | <a href="#">NM_017876.3</a> | MGC1022;FLJ20552;MGC14317        |              |                         |
| GI_37622893-I | 275.3  | 279    | 282.7  | RNF126     | <a href="#">NM_194460.1</a> | MGC1022;FLJ20552;MGC14317        |              |                         |
| GI_37622895-S | 101.2  | 122    | 121.2  | RNF127     | <a href="#">NM_024778.3</a> | FLJ22612                         |              |                         |
| GI_37622897-S | 106.6  | 116.7  | 104.8  | RNF129     | <a href="#">NM_152620.2</a> | FLJ35882                         | zinc ion     | intracellula            |
| GI_37622898-S | 282    | 249.8  | 288.3  | RNF137     | <a href="#">NM_018073.5</a> | SS-56;FLJ10369                   | zinc ion     | intracellula            |
| GI_37622900-A | 2048.7 | 847.9  | 421.7  | DSIPI      | <a href="#">NM_004089.2</a> | DIP;GILZ;TSC-22R                 | transcripti  | nucleus regulation      |
| GI_37622900-I | 184.5  | 133.4  | 122.5  | DSIPI      | <a href="#">NM_004089.2</a> | DIP;GILZ;TSC-22R                 | transcripti  | nucleus regulation      |
| GI_37622902-I | 132.9  | 158.9  | 143.2  | DSIPI      | <a href="#">NM_198057.1</a> | DIP;GILZ;TSC-22R                 | transcripti  | nucleus regulation      |
| GI_37622904-S | 380.9  | 493.7  | 726.3  | PPP1R3D    | <a href="#">NM_006242.3</a> | PPP1R6                           | protein      | glycogen                |
| GI_37622905-A | 104.1  | 100.4  | 91.9   | SCN5A      | <a href="#">NM_000335.3</a> | HB1;HB2;HH1;IVF;LQT3;Nav1.5      | sodium       | voltage- sodium         |
| GI_37622908-I | 97     | 109    | 96.6   | USH3A      | <a href="#">NM_174878.2</a> | USH3                             |              |                         |
| GI_37622909-S | 122    | 138.7  | 107.6  | CHRM1      | <a href="#">NM_000738.2</a> | M1;HM1;MGC30125                  | muscarini    | membran phosphati       |
| GI_37655156-S | 1431.9 | 1292.8 | 711.3  | COPEB      | <a href="#">NM_001300.3</a> | GBF;ZF9;BCD1;CPBP;KLF6;PAC1;ST12 |              |                         |
| GI_37655158-A | 1436.4 | 1690.2 | 1769.7 | COX15      | <a href="#">NM_004376.3</a> |                                  | cytochrom    | mitochond respiratory   |
| GI_37655159-I | 399.7  | 586.3  | 504.9  | COX15      | <a href="#">NM_078470.2</a> |                                  | cytochrom    | mitochond respiratory   |
| GI_37655164-S | 551.7  | 538.4  | 594.7  | RNF134     | <a href="#">NM_032154.3</a> | MBLR;MGC15678;MGC17541           |              |                         |
| GI_37655166-I | 192.8  | 178    | 176.6  | RNF135     | <a href="#">NM_032322.3</a> | MGC13061                         |              |                         |
| GI_37655168-A | 140    | 127    | 131.2  | RNF135     | <a href="#">NM_197939.1</a> | MGC13061                         |              |                         |
| GI_37655170-I | 96.4   | 112    | 109.8  | ZNF155     | <a href="#">NM_003445.2</a> | pHZ-96                           | transcripti  | nucleus regulation      |
| GI_37655172-A | 326.4  | 372.5  | 328.9  | ZNF155     | <a href="#">NM_198089.1</a> | pHZ-96                           | transcripti  | nucleus regulation      |
| GI_37655174-S | 850.3  | 588    | 467.5  | ZNF26      | <a href="#">NM_019591.2</a> | KOX20;FLJ20755                   | DNA          | nucleus regulation      |



|               |         |        |        |           |                             |                                     |             |              |             |
|---------------|---------|--------|--------|-----------|-----------------------------|-------------------------------------|-------------|--------------|-------------|
| GI_37655176-S | 101.1   | 109.4  | 95.8   | ZNF415    | <a href="#">NM_018355.2</a> | FLJ11191                            | nucleic     | intracellula | regulation  |
| GI_37655178-S | 168.5   | 196.3  | 171.4  | AP3B2     | <a href="#">NM_004644.3</a> | NAPT8                               | vesicle     | secretory    | post-Golgi  |
| GI_37655179-S | 1867.2  | 1816.9 | 2702.6 | DUSP3     | <a href="#">NM_004090.2</a> | VHR                                 | protein     |              | protein     |
| GI_37655180-S | 156.4   | 136.4  | 168.4  | TCEB3BP1  | <a href="#">NM_020695.2</a> | EloA-BP1;KIAA1138                   | exonuclea   | intracellula | regulation  |
| GI_37655182-S | 14866.6 | 9611.6 | 10921  | NDRG1     | <a href="#">NM_006096.2</a> | GC4;RTP;DRG1;NDR1;NMSL;TDD5;CAP43;  | tumor       | nucleus      | response    |
| GI_37674208-S | 4626.7  | 4627   | 4431.6 | WDR18     | <a href="#">NM_024100.2</a> | MGC2436;R32184_1                    |             |              |             |
| GI_37674209-S | 378.2   | 402.5  | 355.8  | SSH2      | <a href="#">NM_033389.2</a> | SSH-2;KIAA1725                      |             |              |             |
| GI_37674228-S | 115.6   | 145.6  | 139.6  | KIAA0514  | <a href="#">NM_014696.2</a> | MGC15171                            |             |              |             |
| GI_37674229-S | 163     | 141.1  | 121    | C9orf61   | <a href="#">NM_004816.2</a> | X123                                |             |              |             |
| GI_37674231-S | 507.6   | 435.4  | 285    | HOZFP     | <a href="#">NM_152995.3</a> |                                     | transcripti | nucleus      | regulation  |
| GI_37674282-S | 202.8   | 245.6  | 236.5  | C7orf28A  | <a href="#">NM_015622.4</a> | CGI-43;H_DJ1163J12.2                |             |              |             |
| GI_37674288-S | 3120.1  | 3314.5 | 3018.7 | C7orf28B  | <a href="#">NM_198097.1</a> | MGC19819;DKFZP586I1023;H_NH0577018. |             |              |             |
| GI_37675267-A | 252.7   | 233.5  | 263.4  | ZNF200    | <a href="#">NM_198087.1</a> |                                     | molecular   | nucleus      | regulation  |
| GI_37675271-A | 123.5   | 125.5  | 127.4  | ZFP29     | <a href="#">NM_017894.2</a> | FLJ20595                            | transcripti | nucleus      | regulation  |
| GI_37675271-I | 104.2   | 106.9  | 111    | ZFP29     | <a href="#">NM_017894.2</a> | FLJ20595                            | transcripti | nucleus      | regulation  |
| GI_37675272-I | 99.8    | 112.3  | 109.4  | ZNF200    | <a href="#">NM_003454.2</a> |                                     | molecular   | nucleus      | regulation  |
| GI_37675274-I | 108.9   | 123.5  | 102.6  | ZFP29     | <a href="#">NM_181877.2</a> | FLJ20595                            | transcripti | nucleus      | regulation  |
| GI_37675275-S | 569.3   | 720.5  | 530    | NME4      | <a href="#">NM_005009.2</a> | NM23H4;nm23-H4                      | nucleoside  | mitochond    | nucleoside  |
| GI_37675276-S | 108.6   | 123.1  | 98.3   | RNF148    | <a href="#">NM_198085.1</a> | MGC35222                            | peptidase   |              | proteolysis |
| GI_37675278-I | 141.4   | 120.7  | 114.2  | JUB       | <a href="#">NM_032876.4</a> | MGC15563                            | transporte  | membran      | transport   |
| GI_37675279-A | 1456.4  | 886.6  | 585.4  | JUB       | <a href="#">NM_198086.1</a> | MGC15563                            | transporte  | membran      | transport   |
| GI_37675279-I | 139.8   | 129    | 114.7  | JUB       | <a href="#">NM_198086.1</a> | MGC15563                            | transporte  | membran      | transport   |
| GI_37675281-S | 754.9   | 935.1  | 749.5  | DECR2     | <a href="#">NM_020664.3</a> | PDCR                                | oxidoredu   |              | metabolis   |
| GI_37675282-S | 96.7    | 101.5  | 91.6   | AP4E1     | <a href="#">NM_007347.2</a> |                                     |             | secretory    | nonselecti  |
| GI_37675386-A | 104.4   | 98.7   | 91.1   | CLECSF12  | <a href="#">NM_197954.1</a> | BGR;DECTIN1                         |             |              |             |
| GI_37675386-I | 100.3   | 93.6   | 85     | CLECSF12  | <a href="#">NM_197954.1</a> | BGR;DECTIN1                         |             |              |             |
| GI_37693520-S | 854.8   | 826    | 735.4  | DHRS4L2   | <a href="#">NM_198083.1</a> | MGC905                              |             |              |             |
| GI_37693523-S | 527.4   | 471.4  | 538.2  | ZFH1B     | <a href="#">NM_014795.2</a> | SIP1;SIP-1;SMADIP1;KIAA0569         | transcripti | nucleus      | regulation  |
| GI_37693524-A | 344.7   | 427.3  | 338.7  | ZNF189    | <a href="#">NM_003452.2</a> |                                     | transcripti | nucleus      | negative    |
| GI_37693992-S | 405.8   | 551.1  | 513.4  | NME3      | <a href="#">NM_002513.2</a> | DR-nm23                             | nucleoside  |              | induction   |
| GI_37693994-S | 448.3   | 583.1  | 532.5  | KLF13     | <a href="#">NM_015995.2</a> | BTEB3;FKLF2;NSLP1;RFLAT1;RFLAT-1    | RNA         | nucleus      | transcripti |
| GI_37693998-S | 90.3    | 81.5   | 73.8   | CKTSF1B1  | <a href="#">NM_013372.4</a> | DRM;IHG-2;GREMLIN                   | protein     | extracellul  | developm    |
| GI_37694060-A | 250.3   | 303.6  | 280.4  | AQP1      | <a href="#">NM_000385.3</a> | CO;CHIP28;AQP-CHIP;MGC26324         | water       | integral to  | water       |
| GI_37694061-I | 184.6   | 237.8  | 203.7  | AQP1      | <a href="#">NM_198098.1</a> | CO;CHIP28;AQP-CHIP;MGC26324         | water       | integral to  | water       |
| GI_37694063-I | 192.9   | 164    | 149.6  | EBAG9     | <a href="#">NM_004215.3</a> | EB9;RCAS1                           | apoptotic   | kinesin      | apoptosis   |
| GI_37694064-A | 1463.9  | 1224.3 | 1161.2 | EBAG9     | <a href="#">NM_198120.1</a> | EB9;RCAS1                           | apoptotic   | kinesin      | apoptosis   |
| GI_37694064-I | 128     | 125    | 126.2  | EBAG9     | <a href="#">NM_198120.1</a> | EB9;RCAS1                           | apoptotic   | kinesin      | apoptosis   |
| GI_37694066-A | 127.8   | 269.3  | 447    | NMES1     | <a href="#">NM_197955.1</a> | FOAP-11;FLJ22645;MGC32925           |             |              |             |
| GI_37694068-I | 105.7   | 108.3  | 116.1  | NMES1     | <a href="#">NM_032413.2</a> | FOAP-11;FLJ22645;MGC32925           |             |              |             |
| GI_37700248-S | 113.2   | 114.5  | 104.9  | LOC253012 | <a href="#">NM_198151.1</a> |                                     |             |              |             |
| GI_37700251-S | 96.1    | 83.5   | 83.5   | URP       | <a href="#">NM_198152.1</a> |                                     |             |              |             |
| GI_37700253-S | 84.8    | 87.5   | 99.8   | LOC285852 | <a href="#">NM_198153.1</a> |                                     |             |              |             |
| GI_37700255-S | 161.4   | 200.9  | 162.5  | LOC339168 | <a href="#">NM_198154.1</a> |                                     |             |              |             |
| GI_37704380-S | 18423.5 | 20075  | 14032  | B2M       | <a href="#">NM_004048.2</a> |                                     | amyloid     |              | antigen     |

|               |        |        |        |          |                             |                                   |             |              |                      |
|---------------|--------|--------|--------|----------|-----------------------------|-----------------------------------|-------------|--------------|----------------------|
| GI_37704381-A | 137.7  | 150.5  | 130    | DEFB119  | <a href="#">NM_153289.2</a> | DEFB-19;DEFB-20;DEFB120           |             |              | xenobiotic           |
| GI_37704385-S | 103.8  | 125.6  | 120.9  | RYR3     | <a href="#">NM_001036.2</a> |                                   | calcium-    | membran      | calcium              |
| GI_37704387-S | 2316.7 | 2038.8 | 2330.6 | SOX9     | <a href="#">NM_000346.2</a> | CMD1;SRA1;CMPD1                   | RNA         | nucleus      | cartilage            |
| GI_38016126-S | 81.2   | 82.5   | 61.9   | KIAA0117 | <a href="#">NM_015014.1</a> |                                   | DNA         | intracellula | biological_          |
| GI_38016130-S | 377.8  | 679.1  | 306    | GSTO2    | <a href="#">NM_183239.1</a> |                                   | glutathion  | cytoplasm    | metabolis            |
| GI_38016132-S | 129.7  | 137.3  | 126.8  | FLJ40113 | <a href="#">NM_198079.1</a> |                                   |             |              |                      |
| GI_38016136-S | 113.4  | 122.2  | 120.8  | GPR103   | <a href="#">NM_198179.1</a> | AQ27;SP9155                       |             | neuropepti   | integral to electron |
| GI_38016139-S | 91.1   | 97.5   | 98.6   | P518     | <a href="#">NM_198180.1</a> | QRFP                              |             |              |                      |
| GI_38016155-S | 99.4   | 95.6   | 102.2  | FLJ11331 | <a href="#">NM_018392.3</a> |                                   |             |              |                      |
| GI_38016157-S | 140.3  | 151.2  | 136.2  | LOC91431 | <a href="#">NM_138698.2</a> |                                   |             |              |                      |
| GI_38016179-S | 116.8  | 124.5  | 106.6  | FAM13C1  | <a href="#">NM_198215.1</a> | MGC33233                          |             |              |                      |
| GI_38016201-S | 488    | 440.6  | 514.9  | SATB2    | <a href="#">NM_015265.1</a> | FLJ21474;KIAA1034                 |             |              |                      |
| GI_38016203-S | 76.7   | 79.4   | 85.4   | CBWD2    | <a href="#">NM_172003.2</a> |                                   |             |              |                      |
| GI_38016902-S | 879.2  | 957.4  | 891.3  | XTP2     | <a href="#">NM_015172.2</a> | BAT2-iso;KIAA1096                 |             |              |                      |
| GI_38016903-S | 133.3  | 154.8  | 128.5  | TSRC1    | <a href="#">NM_019032.2</a> | DKFZP434K1772                     |             |              |                      |
| GI_38016906-A | 98.9   | 225.2  | 137.4  | STOM     | <a href="#">NM_198194.1</a> | BND7;EPB7;EPB72                   |             |              | cytoskelet           |
| GI_38016908-S | 108.9  | 108.4  | 100.5  | TCF1     | <a href="#">NM_000545.3</a> | HNF1;LFB1;HNF1A;MODY3             | RNA         | nucleus      | regulation           |
| GI_38016910-I | 139.7  | 173.7  | 147.2  | STOM     | <a href="#">NM_004099.4</a> | BND7;EPB7;EPB72                   |             |              | cytoskelet           |
| GI_38016912-S | 3939.4 | 4402   | 4075.5 | SFRS9    | <a href="#">NM_003769.2</a> | SRp30c                            | pre-mRNA    | nucleus      | mRNA                 |
| GI_38016913-S | 196.8  | 269.4  | 232.9  | SAMHD1   | <a href="#">NM_015474.2</a> | DCIP;MOP-5;SBB188;DKFZP564A032    | GTPase      | intracellula | response             |
| GI_38016915-A | 181.2  | 137.8  | 89.7   | SDCBP2   | <a href="#">NM_015685.3</a> | ST-2;SITAC18                      | protein     |              | intracellula         |
| GI_38016915-I | 333.7  | 421.5  | 376.8  | SDCBP2   | <a href="#">NM_015685.3</a> | ST-2;SITAC18                      | protein     |              | intracellula         |
| GI_38016917-I | 95.4   | 113.2  | 95.7   | RSN      | <a href="#">NM_002956.2</a> | CLIP;CLIP1;CYLN1;CLIP170;CLIP-170 | microtubul  | endosome     | nonselecti           |
| GI_38016918-S | 741.2  | 762.4  | 636.2  | PRO0149  | <a href="#">NM_014117.2</a> |                                   |             |              |                      |
| GI_38016920-S | 1640.7 | 1512.2 | 1344.8 | RAB35    | <a href="#">NM_006861.4</a> | RAY;H-ray;RAB1C                   | RAB small   |              | small                |
| GI_38016921-A | 472.4  | 566.5  | 596.4  | POP5     | <a href="#">NM_198202.1</a> | RPP2;RPP20;HSPC004                |             |              |                      |
| GI_38016923-S | 512    | 489.9  | 433.8  | PRKAB1   | <a href="#">NM_006253.4</a> | ampk;HAMPKb                       |             |              | signal               |
| GI_38016925-I | 95.1   | 103    | 93.3   | POP5     | <a href="#">NM_198201.1</a> | RPP2;RPP20;HSPC004                |             |              |                      |
| GI_38016927-S | 105.8  | 113.2  | 97.4   | PLA2G1B  | <a href="#">NM_000928.2</a> | PLA2;PLA2A;PPLA2                  | phospholi   |              | actin                |
| GI_38016928-S | 5659.5 | 5303.9 | 5423.3 | PBP      | <a href="#">NM_002567.2</a> | RKIP                              | phosphati   |              |                      |
| GI_38016929-A | 123.4  | 171.1  | 128    | OASL     | <a href="#">NM_198213.1</a> | TRIP14;p59OASL                    | double-     | nucleolus    | immune               |
| GI_38016931-S | 151.4  | 135.6  | 110.7  | PARG1    | <a href="#">NM_004815.2</a> |                                   | Rho         |              | Rho                  |
| GI_38016933-I | 371.4  | 430.7  | 385.7  | OASL     | <a href="#">NM_003733.2</a> | TRIP14;p59OASL                    | double-     | nucleolus    | immune               |
| GI_38016936-S | 124.4  | 129.9  | 156.2  | KPI2     | <a href="#">NM_014916.2</a> | cprk;KPI-2;KIAA1079               | protein-    |              | protein              |
| GI_38016938-S | 100.7  | 117.4  | 100.6  | HPD      | <a href="#">NM_002150.2</a> | PPD                               | 4-          |              | tyrosine             |
| GI_38016939-S | 913    | 973.9  | 1260.2 | HSRG1    | <a href="#">NM_014940.2</a> | KIAA0872                          | molecular   |              |                      |
| GI_38016940-S | 145.6  | 226    | 222.3  | HSPB8    | <a href="#">NM_014365.2</a> | H11;E2IG1;HSP22                   | protein     | cellular_co  | biological_          |
| GI_38016941-I | 234.1  | 272.6  | 228.4  | GSN      | <a href="#">NM_000177.3</a> |                                   | barbed-     | extracellul  | actin                |
| GI_38016942-S | 467.3  | 544.6  | 514.8  | FLJ14466 | <a href="#">NM_032790.2</a> |                                   |             |              |                      |
| GI_38016944-S | 383    | 336.2  | 333.8  | DEAF1    | <a href="#">NM_021008.2</a> | SPN;NUDR;ZMYND5                   | transcripti | nucleus      | germ-cell            |
| GI_38016946-S | 136.5  | 171.4  | 195.3  | C5       | <a href="#">NM_001735.2</a> |                                   | antibacteri | membran      | response             |
| GI_38016948-A | 522.5  | 624.2  | 540.7  | ASTN2    | <a href="#">NM_198188.1</a> | KIAA0634                          |             |              |                      |
| GI_38016948-I | 161.1  | 199.9  | 190.5  | ASTN2    | <a href="#">NM_198188.1</a> | KIAA0634                          |             |              |                      |
| GI_38016954-I | 108.8  | 118.5  | 102.8  | ASTN2    | <a href="#">NM_014010.2</a> | KIAA0634                          |             |              |                      |

|               |        |        |        |           |                             |                                      |              |              |              |
|---------------|--------|--------|--------|-----------|-----------------------------|--------------------------------------|--------------|--------------|--------------|
| GI_38016956-S | 205.1  | 224    | 241.4  | ARHF      | <a href="#">NM_019034.2</a> | RIF;FLJ20247                         |              |              |              |
| GI_38026848-I | 92     | 103    | 100.6  | ABHD2     | <a href="#">NM_007011.4</a> | HS1-2;LABH2;PHPS1-2;MGC26249         | catalytic    | integral to  | biological_  |
| GI_38026872-A | 141.5  | 143.9  | 121.1  | ABHD2     | <a href="#">NM_152924.2</a> | HS1-2;LABH2;PHPS1-2;MGC26249         | catalytic    | integral to  | biological_  |
| GI_38026891-S | 336.2  | 349.3  | 399    | ALG6      | <a href="#">NM_013339.2</a> |                                      | oligosacch   | endoplas     | N-linked     |
| GI_38026914-A | 462.5  | 555.1  | 503.9  | ARHGEF11  | <a href="#">NM_014784.2</a> | GTRAP48;KIAA0380;PDZ-RHOGEF          | signal       |              | intracellula |
| GI_38026933-I | 116.5  | 127.5  | 117.4  | ARHGEF11  | <a href="#">NM_198236.1</a> | GTRAP48;KIAA0380;PDZ-RHOGEF          | signal       |              | intracellula |
| GI_38026942-A | 101.7  | 123.5  | 115.3  | C21orf107 | <a href="#">NM_018963.3</a> | N143;WDR9;FLJ11315                   |              |              |              |
| GI_38026942-I | 164.6  | 171.5  | 182    | C21orf107 | <a href="#">NM_018963.3</a> | N143;WDR9;FLJ11315                   |              |              |              |
| GI_38026951-I | 120    | 133.9  | 143.3  | C21orf107 | <a href="#">NM_033656.2</a> | N143;WDR9;FLJ11315                   |              |              |              |
| GI_38026959-A | 2434.3 | 2353.8 | 2296.8 | C21orf33  | <a href="#">NM_198155.1</a> | ES1;HES1;KNPH;KNPI;GT335;KNP-        | molecular    | mitochond    |              |
| GI_38026968-I | 610.4  | 589.6  | 602.3  | C21orf33  | <a href="#">NM_004649.4</a> | ES1;HES1;KNPH;KNPI;GT335;KNP-        | molecular    | mitochond    |              |
| GI_38027922-S | 2757.7 | 2654.6 | 2464.6 | COPS5     | <a href="#">NM_006837.2</a> | JAB1;SGN5;MOV-34;MGC3149             | translation  | eukaryotic   | protein      |
| GI_38027945-S | 413.8  | 462.9  | 480.1  | COPS6     | <a href="#">NM_006833.4</a> | MOV34-34KD                           | translation  |              | translation  |
| GI_38044105-S | 191.1  | 214.7  | 237.9  | OVTN      | <a href="#">NM_198185.1</a> |                                      |              |              |              |
| GI_38044107-S | 95.3   | 110.3  | 113    | OSTN      | <a href="#">NM_198184.1</a> |                                      |              |              |              |
| GI_38044109-S | 169.7  | 179.2  | 143.4  | LOC374676 | <a href="#">NM_198181.1</a> |                                      |              |              |              |
| GI_38044111-A | 113.1  | 122.5  | 125.5  | RSN       | <a href="#">NM_198240.1</a> | CLIP;CLIP1;CYLN1;CLIP170;CLIP-170    | microtubul   | endosome     | nonselecti   |
| GI_38044113-I | 137    | 122.1  | 109.7  | SDCBP2    | <a href="#">NM_080489.2</a> | ST-2;SITAC18                         | protein      |              | intracellula |
| GI_38044279-S | 266.7  | 290.6  | 286.7  | SEDL      | <a href="#">NM_014563.2</a> | SEDT                                 | intracellula | Golgi        | nonselecti   |
| GI_38044281-A | 1426.3 | 656.9  | 1106.6 | NAV2      | <a href="#">NM_145117.2</a> | HELAD1;RAINB1;POMFIL2;FLJ10633;FLJ11 |              |              |              |
| GI_38044283-I | 178.2  | 228.2  | 188.4  | NAV2      | <a href="#">NM_182964.3</a> | HELAD1;RAINB1;POMFIL2;FLJ10633;FLJ11 |              |              |              |
| GI_38044285-S | 98.6   | 97.5   | 103.6  | ZNF547    | <a href="#">NM_173631.2</a> | FLJ31100                             | nucleic      | intracellula | regulation   |
| GI_38044287-A | 1609.9 | 2386.6 | 1897.6 | GSN       | <a href="#">NM_198252.1</a> |                                      | barbed-      | extracellul  | actin        |
| GI_38044287-I | 168.3  | 215.8  | 171.8  | GSN       | <a href="#">NM_198252.1</a> |                                      | barbed-      | extracellul  | actin        |
| GI_38044289-S | 558.3  | 349    | 318    | ZCCHC8    | <a href="#">NM_017612.2</a> | DKFZp434E2220                        | DNA          | nucleus      | regulation   |
| GI_38045884-S | 158    | 165.1  | 284    | CSMD2     | <a href="#">NM_052896.2</a> | KIAA1884                             |              |              |              |
| GI_38045885-A | 184.7  | 149.8  | 131.5  | CSMD3     | <a href="#">NM_052900.2</a> | KIAA1894                             |              |              |              |
| GI_38045889-I | 117.9  | 138.4  | 128.7  | CSMD3     | <a href="#">NM_198124.1</a> | KIAA1894                             |              |              |              |
| GI_38045893-A | 203.1  | 223.6  | 216.5  | ELKS      | <a href="#">NM_178038.1</a> | ERC1;RAB6IP2;KIAA1081;MGC12974       |              |              |              |
| GI_38045897-I | 113.5  | 106.5  | 98.6   | ELKS      | <a href="#">NM_178040.1</a> | ERC1;RAB6IP2;KIAA1081;MGC12974       |              |              |              |
| GI_38045900-I | 182.4  | 185.4  | 161.1  | TFCP2L2   | <a href="#">NM_014552.2</a> | MGR;GRHL1;LBP-32                     |              |              |              |
| GI_38045902-A | 90.9   | 85.3   | 95.6   | TFCP2L2   | <a href="#">NM_198182.1</a> | MGR;GRHL1;LBP-32                     |              |              |              |
| GI_38045904-I | 152    | 145.9  | 148.2  | VHL       | <a href="#">NM_000551.2</a> | RCA1;HRCA1                           | transcripti  | cytosol      | negative     |
| GI_38045905-A | 307.4  | 323.6  | 264.7  | VHL       | <a href="#">NM_198156.1</a> | RCA1;HRCA1                           | transcripti  | cytosol      | negative     |
| GI_38045907-A | 187    | 231.7  | 344.9  | LAMA3     | <a href="#">NM_000227.2</a> | E170;LOCS;LAMNA                      | structural   | basement     | epidermal    |
| GI_38045907-I | 105.6  | 114.3  | 118.3  | LAMA3     | <a href="#">NM_000227.2</a> | E170;LOCS;LAMNA                      | structural   | basement     | epidermal    |
| GI_38045909-I | 369.8  | 406    | 377    | LAMA3     | <a href="#">NM_198129.1</a> | E170;LOCS;LAMNA                      | structural   | basement     | epidermal    |
| GI_38045911-A | 7082   | 8195.3 | 7242.3 | NME1      | <a href="#">NM_000269.2</a> | AWD;GAAD;NM23;NDPKA;NM23-H1          | nucleoside   | nucleus      | negative     |
| GI_38045912-I | 253.8  | 295.6  | 248    | NME1      | <a href="#">NM_198175.1</a> | AWD;GAAD;NM23;NDPKA;NM23-H1          | nucleoside   | nucleus      | negative     |
| GI_38045914-S | 2343.4 | 3422.4 | 3941.6 | PAPPA     | <a href="#">NM_002581.3</a> | PAPA;PAPP-A;ASBABP2;IGFBP-4ase       | metallope    | membran      | pregnancy    |
| GI_38045916-A | 360.1  | 456.4  | 405    | PIGO      | <a href="#">NM_152850.2</a> | MGC3079;FLJ00135;MGC20536;DKFZp434   | molecular    | endoplas     | GPI          |
| GI_38045918-S | 160.2  | 210.5  | 179.3  | HIP1      | <a href="#">NM_005338.4</a> |                                      | structural   | cytoskelet   | cell shape   |
| GI_38045920-S | 859.7  | 684.7  | 483.4  | HNT       | <a href="#">NM_016522.2</a> | NTM;MGC60329                         | cell         | integral to  | neuronal     |
| GI_38045927-A | 261.2  | 342.6  | 291.2  | RAPSN     | <a href="#">NM_032645.3</a> | MGC3597                              |              | cytoskelet   | synaptic     |

|               |        |        |        |            |                             |                                   |             |             |             |
|---------------|--------|--------|--------|------------|-----------------------------|-----------------------------------|-------------|-------------|-------------|
| GI_38045929-I | 98.7   | 94.6   | 93.7   | RAPSN      | <a href="#">NM_005055.3</a> | MGC3597                           |             | cytoskelet  | synaptic    |
| GI_38045930-S | 179.5  | 225.7  | 172.4  | RNF122     | <a href="#">NM_024787.2</a> | FLJ12526                          |             |             |             |
| GI_38045932-I | 99.5   | 91.6   | 90.8   | RNF138     | <a href="#">NM_016271.3</a> | HSD-4;STRIN;MGC8758               |             |             |             |
| GI_38045933-A | 363.7  | 367.6  | 292.3  | RNF138     | <a href="#">NM_198128.1</a> | HSD-4;STRIN;MGC8758               |             |             |             |
| GI_38045935-S | 93.5   | 90.4   | 82     | RNF139     | <a href="#">NM_007218.3</a> | RCA1;TRC8;HRCA1;MGC31961          | receptor    | integral to | signal      |
| GI_38045936-S | 213    | 239    | 230    | RNF141     | <a href="#">NM_016422.3</a> | ZFP26;ZNF230;MGC8715              |             |             |             |
| GI_38045937-S | 2341.9 | 3282.2 | 1947.3 | RNF144     | <a href="#">NM_014746.2</a> | KIAA0161;UBCE7IP4                 |             | nucleus     |             |
| GI_38045939-S | 515.3  | 512.6  | 583.1  | RNF31      | <a href="#">NM_017999.3</a> | ZIBRA;FLJ101111;FLJ23501;MGC19975 |             |             |             |
| GI_38045945-A | 1069.6 | 1350.1 | 977.8  | UBE1C      | <a href="#">NM_198197.1</a> | UBA3;hUba3;MGC22384;DKFZp566J164  | ubiquitin-  |             | proteolysis |
| GI_38045947-S | 429.8  | 772.9  | 599.3  | UBE1L      | <a href="#">NM_003335.2</a> | D8;UBE2;MGC12713                  | ubiquitin   |             | protein     |
| GI_38045949-S | 543.9  | 657.1  | 497.5  | UBE2Q      | <a href="#">NM_017582.5</a> | NICE-5;PRO3094                    | ubiquitin-  |             | ubiquitin   |
| GI_38045950-S | 219.8  | 260    | 243.5  | ZNF10      | <a href="#">NM_015394.4</a> | KOX1;MGC26561                     | RNA         |             | regulation  |
| GI_38045951-S | 563.3  | 713.7  | 663.3  | ZNF14      | <a href="#">NM_021030.2</a> | KOX6;GIOT-4                       | DNA         | nucleus     | regulation  |
| GI_38045953-S | 613.1  | 600.4  | 606.5  | ZNF16      | <a href="#">NM_006958.2</a> | KOX9                              | DNA         | nucleus     | regulation  |
| GI_38045955-S | 109.4  | 112    | 100.9  | ZNF19      | <a href="#">NM_006961.2</a> | KOX12;MGC51021                    | transcripti | nucleus     | regulation  |
| GI_38045964-A | 119    | 138.9  | 117.4  | ZNFN1A3    | <a href="#">NM_183231.1</a> | AIOLOS                            | transcripti | nucleus     | mesoderm    |
| GI_38049008-I | 104    | 116.5  | 123.3  | SOM        | <a href="#">NM_198173.1</a> | GRHL3;MGC46624                    |             |             |             |
| GI_38049010-A | 99     | 99.4   | 86.1   | SOM        | <a href="#">NM_198174.1</a> | GRHL3;MGC46624                    |             |             |             |
| GI_38049013-A | 111.8  | 108.7  | 101.4  | SEMG1      | <a href="#">NM_198139.1</a> | SGI;SEMG;MGC14719                 |             | extracellul | inseminati  |
| GI_38049015-S | 82     | 80.2   | 77.4   | SEMG2      | <a href="#">NM_003008.2</a> | SGII                              |             | extracellul |             |
| GI_38093638-S | 119.5  | 133.3  | 123.2  | LMOD3      | <a href="#">NM_198271.1</a> |                                   |             |             |             |
| GI_38093640-S | 1371.8 | 1180.2 | 1428.1 | DKFZP566G1 | <a href="#">NM_198272.1</a> |                                   |             |             | protein     |
| GI_38093642-S | 162.2  | 197    | 144.5  | SMYD1      | <a href="#">NM_198274.1</a> | BOP;ZMYND18                       | DNA         | nucleus     | regulation  |
| GI_38093644-S | 107.7  | 108.5  | 91.8   | LOC196264  | <a href="#">NM_198275.1</a> |                                   |             |             |             |
| GI_38093646-S | 530.8  | 609.2  | 586.8  | TMEM17     | <a href="#">NM_198276.1</a> | FLJ34583                          |             |             |             |
| GI_38093648-S | 450.8  | 701.4  | 803.9  | SLC37A2    | <a href="#">NM_198277.1</a> | FLJ00171                          |             |             |             |
| GI_38093650-S | 153    | 168.9  | 151.8  | LOC255743  | <a href="#">NM_198278.1</a> |                                   |             |             |             |
| GI_38093652-S | 133.8  | 131.5  | 125.6  | LOC256643  | <a href="#">NM_198279.1</a> |                                   |             |             |             |
| GI_38093654-S | 171    | 212.4  | 179.9  | LOC284612  | <a href="#">NM_198280.1</a> |                                   |             |             |             |
| GI_38093656-S | 293.8  | 351.8  | 297.8  | LOC285513  | <a href="#">NM_198281.1</a> |                                   |             |             |             |
| GI_38093658-S | 186.9  | 212.4  | 173    | LOC340061  | <a href="#">NM_198282.1</a> |                                   |             |             |             |
| GI_38093660-S | 114.4  | 122.4  | 112.8  | EGFL11     | <a href="#">NM_198283.1</a> | dJ1018A4.2                        |             |             |             |
| GI_38093662-S | 133.3  | 280.7  | 130.3  | LOC349136  | <a href="#">NM_198285.1</a> |                                   |             |             |             |
| GI_38093664-S | 460.9  | 568.2  | 558.2  | LOC349114  | <a href="#">NM_198284.1</a> |                                   |             |             |             |
| GI_38142463-S | 1168.5 | 826.6  | 645.6  | ABC1       | <a href="#">NM_022070.3</a> | FLJ22087                          |             |             |             |
| GI_38146000-S | 262.6  | 304    | 300.5  | ASXL2      | <a href="#">NM_018263.2</a> | ASXH2;FLJ10898;KIAA1685           |             |             |             |
| GI_38146007-A | 675.4  | 918.9  | 1025.7 | TTC8       | <a href="#">NM_198310.1</a> | BBS8                              |             |             |             |
| GI_38146009-A | 95.2   | 105    | 91.9   | HTR3E      | <a href="#">NM_198313.1</a> | 5-HT3c1                           |             |             |             |
| GI_38146009-I | 100.7  | 112.1  | 103.2  | HTR3E      | <a href="#">NM_198313.1</a> | 5-HT3c1                           |             |             |             |
| GI_38146093-S | 689.6  | 696.5  | 845.7  | THRAP5     | <a href="#">NM_005481.2</a> | DRIP92;TRAP95                     | transcripti | nucleus     | transcripti |
| GI_38146097-S | 246.5  | 227    | 325.8  | SPP1       | <a href="#">NM_000582.2</a> | OPN;BNSP;BSPI;ETA-1               |             | extracellul | ossificatio |
| GI_38146100-S | 753.5  | 624.2  | 518.7  | RPC5       | <a href="#">NM_018119.2</a> | FLJ10509                          | DNA-        | nucleus     | transcripti |
| GI_38146101-S | 498.7  | 445.2  | 434.6  | POLL       | <a href="#">NM_013274.2</a> | BETA-N;POL-KAPPA                  |             |             |             |
| GI_38146102-S | 137.8  | 199.8  | 183.1  | MGC2641    | <a href="#">NM_032631.2</a> |                                   | DNA         | nucleus     | regulation  |

|               |        |        |        |            |                             |                              |             |              |              |
|---------------|--------|--------|--------|------------|-----------------------------|------------------------------|-------------|--------------|--------------|
| GI_38146105-S | 1006.4 | 957.9  | 1008.6 | FLJ11856   | <a href="#">NM_024531.3</a> | GPCR;PAR1;GPCR41             |             |              |              |
| GI_38146106-A | 1382.8 | 1776.7 | 1896.9 | FLJ11021   | <a href="#">NM_023012.3</a> |                              |             |              |              |
| GI_38146110-S | 891    | 736.9  | 729.3  | FLJ10496   | <a href="#">NM_018114.3</a> |                              |             |              |              |
| GI_38146114-S | 982    | 1007.2 | 1152.7 | FHX        | <a href="#">NM_018416.2</a> |                              | transcripti | nucleus      | regulation   |
| GI_38146115-I | 108.6  | 119.1  | 113.6  | C1orf2     | <a href="#">NM_006589.2</a> | COTE1;cote 1                 |             |              |              |
| GI_38146117-A | 1598.1 | 1622.4 | 2113.3 | C1orf2     | <a href="#">NM_198264.1</a> | COTE1;cote 1                 |             |              |              |
| GI_38148698-S | 2627.9 | 2784.1 | 2560.9 | SEC6L1     | <a href="#">NM_007277.3</a> | SEC6;EXOC3;Sec6p             | protein     | kinesin      | intracellula |
| GI_38149839-A | 195.9  | 245.2  | 179.2  | SEC31L2    | <a href="#">NM_015490.3</a> | SEC31B-1;DKFZP434M183        |             |              |              |
| GI_38149839-I | 286.6  | 339.3  | 292.4  | SEC31L2    | <a href="#">NM_015490.3</a> | SEC31B-1;DKFZP434M183        |             |              |              |
| GI_38149909-I | 239.7  | 291.6  | 265    | SEC31L2    | <a href="#">NM_198138.1</a> | SEC31B-1;DKFZP434M183        |             |              |              |
| GI_38149917-I | 1025.7 | 1274.2 | 864.8  | SNRPB2     | <a href="#">NM_003092.3</a> | MGC24807;MGC45309            | pre-mRNA    | snRNP U2     | mRNA         |
| GI_38149980-A | 904.8  | 907.1  | 459.7  | SNRPB2     | <a href="#">NM_198220.1</a> | MGC24807;MGC45309            | pre-mRNA    | snRNP U2     | mRNA         |
| GI_38149990-I | 4124.1 | 3752.8 | 2107.6 | SNRPB      | <a href="#">NM_003091.3</a> | COD;SNRPB1;snRNP-B;SmB/SmB'  | small       | spliceoso    | mRNA         |
| GI_38150006-A | 6710   | 5287.1 | 3383.5 | SNRPB      | <a href="#">NM_198216.1</a> | COD;SNRPB1;snRNP-B;SmB/SmB'  | small       | spliceoso    | mRNA         |
| GI_38156696-A | 276.9  | 361.4  | 308    | MITF       | <a href="#">NM_198158.1</a> | WS2A                         | DNA         | nucleus      | hearing      |
| GI_38156698-I | 224    | 256.8  | 236.5  | MITF       | <a href="#">NM_198159.1</a> | WS2A                         | DNA         | nucleus      | hearing      |
| GI_38156700-I | 95.2   | 108.9  | 103.3  | MITF       | <a href="#">NM_006722.1</a> | WS2A                         | DNA         | nucleus      | hearing      |
| GI_38157975-I | 141.8  | 150.6  | 137.8  | UBE2L3     | <a href="#">NM_198157.1</a> | E2-F1;L-UBC;UBCH7;UbcM4      | ubiquitin   | ubiquitin    | ubiquitin-   |
| GI_38157977-A | 1487.1 | 1518.8 | 1394.2 | UBE2L3     | <a href="#">NM_003347.2</a> | E2-F1;L-UBC;UBCH7;UbcM4      | ubiquitin   | ubiquitin    | ubiquitin-   |
| GI_38157980-A | 400.2  | 414.3  | 329.2  | UBE2L6     | <a href="#">NM_004223.3</a> | RIG-B;UBCH8;MGC40331         | ubiquitin   |              | protein      |
| GI_38157980-I | 929.9  | 983.3  | 715    | UBE2L6     | <a href="#">NM_004223.3</a> | RIG-B;UBCH8;MGC40331         | ubiquitin   |              | protein      |
| GI_38157985-I | 128.2  | 146.4  | 135.9  | UBE2L6     | <a href="#">NM_198183.1</a> | RIG-B;UBCH8;MGC40331         | ubiquitin   |              | protein      |
| GI_38158004-A | 134.3  | 144.4  | 140.6  | TYROBP     | <a href="#">NM_198125.1</a> | DAP12;KARAP;PLOSL            | receptor    | integral to  | cellular     |
| GI_38158008-A | 99.1   | 99.8   | 99     | CIDEA      | <a href="#">NM_001279.2</a> | CIDE-A                       | apoptosis   | intracellula | DNA          |
| GI_38158010-I | 110    | 109    | 96.1   | CIDEA      | <a href="#">NM_198289.1</a> | CIDE-A                       | apoptosis   | intracellula | DNA          |
| GI_38158012-S | 100.5  | 95.3   | 89.8   | MAMDC1     | <a href="#">NM_182830.2</a> | MDGA2;c14_5286               |             | membran      |              |
| GI_38158014-S | 131.3  | 132.9  | 120.5  | MAML3      | <a href="#">NM_018717.2</a> | GDN;MAM2;CAGH3;ERDA3;MAM-    | transcripti | nucleus      | neurogene    |
| GI_38158017-S | 173.8  | 158.2  | 163.7  | CEP1       | <a href="#">NM_007018.3</a> | FAN;CEP110                   | RNA         | nucleus      |              |
| GI_38158019-I | 107.8  | 121.7  | 108.4  | DHX34      | <a href="#">NM_194428.1</a> | HRH1;DDX34;KIAA0134          | ATP         |              |              |
| GI_38158021-A | 377.9  | 282.6  | 306.3  | DHX34      | <a href="#">NM_014681.3</a> | HRH1;DDX34;KIAA0134          | ATP         |              |              |
| GI_38158027-S | 157    | 169.4  | 159.9  | GPR54      | <a href="#">NM_032551.2</a> | AXOR12;HOT7T175              | receptor    | integral to  | G-protein    |
| GI_38158029-S | 6543.9 | 5421.9 | 4632.1 | SFRS6      | <a href="#">NM_006275.4</a> | B52;SRP55;MGC5045            | pre-mRNA    | nucleus      | mRNA         |
| GI_38175820-S | 122.3  | 123.2  | 111.7  | DKFZp434B1 | <a href="#">NM_178275.3</a> |                              |             |              |              |
| GI_38176148-S | 78.3   | 76.5   | 71.5   | GUCA2A     | <a href="#">NM_033553.2</a> | GUCA2;STARA;GUANYLIN         | peptide     | extracellul  | signal       |
| GI_38176150-S | 221.1  | 218.3  | 216.6  | KIAA1715   | <a href="#">NM_030650.1</a> | UI;LNP;uinaless              |             |              |              |
| GI_38176152-S | 98     | 98.9   | 101.3  | NODAL      | <a href="#">NM_018055.3</a> |                              | cytokine    |              | developm     |
| GI_38176153-S | 331.1  | 327.5  | 388.9  | UNC13B     | <a href="#">NM_006377.2</a> | UNC13;MUNC13;Unc13h2;hmunc13 | receptor    | Golgi        | induction    |
| GI_38176155-S | 321.7  | 382.6  | 355.4  | SARA2      | <a href="#">NM_016103.2</a> | CMRD;SAR1B                   | small       | Golgi        | small        |
| GI_38176156-S | 566    | 512.2  | 834.4  | SPATA2     | <a href="#">NM_006038.2</a> | PD1;KIAA0757                 | molecular   | cytoplasm    | spermatog    |
| GI_38176157-S | 1412.3 | 1335.5 | 1215.1 | CCNK       | <a href="#">NM_003858.2</a> | CPR4;MGC9113                 |             |              | regulation   |
| GI_38176159-S | 152.3  | 170.2  | 160.2  | CHRM5      | <a href="#">NM_012125.2</a> | HM5;MGC41838                 | molecular   | integral to  | phosphati    |
| GI_38176162-S | 821    | 801.2  | 688    | RNF130     | <a href="#">NM_018434.4</a> | GP;G1RZFP;GOLIATH            | peptidase   |              | proteolysis  |
| GI_38176282-I | 100.8  | 106.1  | 117.5  | ASB7       | <a href="#">NM_198243.1</a> | FLJ22551                     |             |              |              |
| GI_38176284-S | 610.9  | 940.8  | 1041.3 | AYP1       | <a href="#">NM_032193.2</a> | FLJ20974;MGC22934            |             |              |              |

|               |        |        |        |           |                             |                                     |             |             |            |
|---------------|--------|--------|--------|-----------|-----------------------------|-------------------------------------|-------------|-------------|------------|
| GI_38176288-I | 99     | 109.3  | 106.5  | CABP1     | <a href="#">NM_031205.2</a> | CALBRAIN;HCALB_BR                   | enzyme      |             |            |
| GI_38176289-A | 342.7  | 369.2  | 358.4  | CABP1     | <a href="#">NM_004276.3</a> | CALBRAIN;HCALB_BR                   | enzyme      |             |            |
| GI_38176290-I | 709.8  | 618.5  | 431.1  | CAV2      | <a href="#">NM_001233.3</a> | CAV;MGC12294                        | tumor       | integral to |            |
| GI_38176291-A | 1258   | 833.5  | 592.6  | CAV2      | <a href="#">NM_198212.1</a> | CAV;MGC12294                        | tumor       | integral to |            |
| GI_38176293-S | 259.5  | 414.6  | 159.3  | LOC348094 | <a href="#">NM_182703.2</a> |                                     |             |             |            |
| GI_38176295-I | 175    | 190    | 161.5  | LASS1     | <a href="#">NM_198207.1</a> | LAG1;UOG1                           |             |             |            |
| GI_38176298-S | 354.7  | 418.7  | 372.8  | MPN2      | <a href="#">NM_183062.2</a> |                                     |             |             |            |
| GI_38176299-S | 104.4  | 121.3  | 100.6  | NES       | <a href="#">NM_006617.1</a> | FLJ21841                            | structural  | intermedia  | cell shape |
| GI_38176301-S | 2525.8 | 2160.2 | 2006.7 | ALG5      | <a href="#">NM_013338.3</a> | bA421P11.2                          | oligosacch  | endoplas    | protein    |
| GI_38194223-S | 244    | 299.8  | 265.7  | GPR25     | <a href="#">NM_005298.2</a> |                                     | G-protein   | integral to | G-protein  |
| GI_38194225-S | 116.3  | 152.2  | 133.3  | SLC6A3    | <a href="#">NM_001044.2</a> | DAT;DAT1                            | dopamine    | integral to | small      |
| GI_38194228-S | 765.6  | 1000.9 | 871.1  | LOC339451 | <a href="#">NM_198317.1</a> |                                     | protein     |             |            |
| GI_38195079-I | 133    | 132.3  | 212.8  | LOH11CR2A | <a href="#">NM_014622.3</a> | BCSC-1                              | tumor       |             |            |
| GI_38195081-A | 140.2  | 149.6  | 267.1  | LOH11CR2A | <a href="#">NM_198315.1</a> | BCSC-1                              | tumor       |             |            |
| GI_38195081-I | 179.3  | 216    | 587    | LOH11CR2A | <a href="#">NM_198315.1</a> | BCSC-1                              | tumor       |             |            |
| GI_38195083-I | 232.1  | 154.7  | 152.5  | HRMT1L2   | <a href="#">NM_198319.1</a> | ANM1;HCP1;IR1B4;PRMT1               | N-          | cytoplasm   | protein    |
| GI_38195085-S | 7974.3 | 9534.6 | 8133.4 | LOC63929  | <a href="#">NM_022098.2</a> |                                     |             |             |            |
| GI_38195086-A | 3516.8 | 3743.9 | 3345.1 | HRMT1L2   | <a href="#">NM_198318.1</a> | ANM1;HCP1;IR1B4;PRMT1               | N-          | cytoplasm   | protein    |
| GI_38198662-S | 227.4  | 255.2  | 242.8  | KCTD8     | <a href="#">NM_198353.1</a> |                                     |             |             |            |
| GI_38198666-S | 143    | 172    | 126.7  | SLC23A3   | <a href="#">NM_144712.2</a> | SVCT3;Yspl1;FLJ31168                | transporte  | membran     | transport  |
| GI_38201610-I | 188.3  | 211    | 185.1  | TCFL4     | <a href="#">NM_170607.2</a> | MLX;MAD7;MXD7                       | transcripti | cytoplasm   | regulation |
| GI_38201613-A | 337.2  | 401.2  | 418    | TCFL4     | <a href="#">NM_198205.1</a> | MLX;MAD7;MXD7                       | transcripti | cytoplasm   | regulation |
| GI_38201615-I | 100.1  | 115.7  | 108.1  | RHOBTB1   | <a href="#">NM_014836.3</a> | KIAA0740;MGC33059;MGC33841          | small       |             | small      |
| GI_38201616-A | 113.3  | 114.1  | 116.4  | RHOBTB1   | <a href="#">NM_198225.1</a> | KIAA0740;MGC33059;MGC33841          | small       |             | small      |
| GI_38201616-I | 96.6   | 101.3  | 99.6   | RHOBTB1   | <a href="#">NM_198225.1</a> | KIAA0740;MGC33059;MGC33841          | small       |             | small      |
| GI_38201618-A | 1461.8 | 1552.9 | 1305.7 | EIF4G1    | <a href="#">NM_004953.2</a> | p220;EIF4G                          | translation | eukaryotic  | regulation |
| GI_38201618-I | 170.9  | 208.9  | 192.2  | EIF4G1    | <a href="#">NM_004953.2</a> | p220;EIF4G                          | translation | eukaryotic  | regulation |
| GI_38201620-I | 110.7  | 98.6   | 95.2   | EIF4G1    | <a href="#">NM_182917.2</a> | p220;EIF4G                          | translation | eukaryotic  | regulation |
| GI_38201629-I | 78.5   | 72.7   | 73.5   | ST7L      | <a href="#">NM_198327.1</a> | ST7R;STLR;FLJ11657;FLJ20284         |             |             |            |
| GI_38201636-A | 264    | 256.3  | 178    | ST7L      | <a href="#">NM_138729.2</a> | ST7R;STLR;FLJ11657;FLJ20284         |             |             |            |
| GI_38201636-I | 272.3  | 274.1  | 225.3  | ST7L      | <a href="#">NM_138729.2</a> | ST7R;STLR;FLJ11657;FLJ20284         |             |             |            |
| GI_38201637-A | 119.5  | 139.6  | 112.6  | HIPK1     | <a href="#">NM_152696.3</a> | Myak;Nbak2;KIAA0630;MGC26642;MGC334 |             |             |            |
| GI_38201637-I | 110.1  | 133.2  | 116.2  | HIPK1     | <a href="#">NM_152696.3</a> | Myak;Nbak2;KIAA0630;MGC26642;MGC334 |             |             |            |
| GI_38201641-I | 88.8   | 93.1   | 93.2   | HIPK1     | <a href="#">NM_198269.1</a> | Myak;Nbak2;KIAA0630;MGC26642;MGC334 |             |             |            |
| GI_38201643-I | 87.9   | 97     | 79     | HIPK1     | <a href="#">NM_181358.1</a> | Myak;Nbak2;KIAA0630;MGC26642;MGC334 |             |             |            |
| GI_38201648-A | 1205.9 | 1027.1 | 970.9  | E2F6      | <a href="#">NM_198257.1</a> | E2F-6                               | transcripti | transcripti | negative   |
| GI_38201654-I | 143.9  | 148.4  | 128.1  | ING3      | <a href="#">NM_019071.2</a> | p47ING3;FLJ20089                    | DNA         |             | regulation |
| GI_38201658-A | 188.1  | 206.5  | 226.8  | ING3      | <a href="#">NM_198267.1</a> | p47ING3;FLJ20089                    | DNA         |             | regulation |
| GI_38201658-I | 109.1  | 99.4   | 113.2  | ING3      | <a href="#">NM_198267.1</a> | p47ING3;FLJ20089                    | DNA         |             | regulation |
| GI_38201660-I | 92.3   | 108.1  | 108.1  | ING1      | <a href="#">NM_005537.3</a> | p33ING1                             | tumor       |             | negative   |
| GI_38201662-A | 280.4  | 418.9  | 380.7  | ING1      | <a href="#">NM_198217.1</a> | p33ING1                             | tumor       |             | negative   |
| GI_38201662-I | 89.9   | 87.6   | 84.3   | ING1      | <a href="#">NM_198217.1</a> | p33ING1                             | tumor       |             | negative   |
| GI_38201666-I | 96.9   | 114.4  | 99.6   | ING1      | <a href="#">NM_198219.1</a> | p33ING1                             | tumor       |             | negative   |
| GI_38201668-S | 121.1  | 120.7  | 111.6  | ING2      | <a href="#">NM_058171.2</a> | ING1-like                           |             |             |            |

|               |        |        |        |          |                             |                                     |              |             |             |
|---------------|--------|--------|--------|----------|-----------------------------|-------------------------------------|--------------|-------------|-------------|
| GI_38201669-A | 150.6  | 160.9  | 145.4  | ING4     | <a href="#">NM_016162.2</a> | my036;p29ING4;MGC12557              | DNA          |             | regulation  |
| GI_38201671-I | 143.8  | 164.9  | 133.1  | ING4     | <a href="#">NM_198287.1</a> | my036;p29ING4;MGC12557              | DNA          |             | regulation  |
| GI_38201673-S | 531.7  | 367.3  | 387.7  | ING5     | <a href="#">NM_032329.4</a> | p28ING5;FLJ23842                    | DNA          |             | regulation  |
| GI_38201674-S | 894.9  | 849.1  | 2026.8 | SDC4     | <a href="#">NM_002999.2</a> | SYND4;MGC22217                      | cytoskelet   | proteoglyc  | biological_ |
| GI_38201676-S | 423.4  | 450.9  | 447.7  | SDCCAG33 | <a href="#">NM_005786.3</a> | NY-CO-33                            | tumor        | nucleus     | regulation  |
| GI_38201678-I | 94.8   | 100.7  | 97.5   | SPO11    | <a href="#">NM_012444.2</a> | MGC39953                            | DNA          | nucleus     | meiotic     |
| GI_38201679-A | 87.4   | 107    | 99.3   | SPO11    | <a href="#">NM_198265.1</a> | MGC39953                            | DNA          | nucleus     | meiotic     |
| GI_38201681-I | 75.2   | 85.4   | 82.5   | RNASE1   | <a href="#">NM_198232.1</a> | RIB1;RNS1;MGC12408                  | pancreatic   | extracellul |             |
| GI_38201687-A | 97.5   | 90.5   | 82.9   | RNASE1   | <a href="#">NM_002933.3</a> | RIB1;RNS1;MGC12408                  | pancreatic   | extracellul |             |
| GI_38201688-S | 4178.6 | 2918.9 | 4527.9 | RANGAP1  | <a href="#">NM_002883.2</a> | Fug1;KIAA1835;MGC20266              | Ran          | nuclear     | signal      |
| GI_38201689-S | 626.7  | 671.2  | 559.2  | RAP2B    | <a href="#">NM_002886.2</a> | MGC20484                            | GTP          |             | signal      |
| GI_38201691-S | 1565.3 | 1358.3 | 1489.4 | RASA3    | <a href="#">NM_007368.2</a> | GAPIII;MGC46517;MGC47588;GAP11P4BP  | GTPase       | plasma      | signal      |
| GI_38201693-S | 691.2  | 2296.9 | 760.1  | RGS4     | <a href="#">NM_005613.3</a> | RGP4;MGC2124;MGC60244               | GTPase       | peripheral  | regulation  |
| GI_38201694-S | 146.8  | 155.3  | 134.5  | RLBP1    | <a href="#">NM_000326.3</a> | CRALBP;MGC3663                      | binding      | soluble     | vitamin A   |
| GI_38201695-S | 233.3  | 211.7  | 212.1  | RTTN     | <a href="#">NM_173630.2</a> | FLJ26356;FLJ39085;DKFZP434G145      |              |             |             |
| GI_38201699-A | 142.4  | 147.1  | 151.9  | TERT     | <a href="#">NM_198254.1</a> | TP2;TRT;EST2;TCS1;hEST2             | telomeras    | telomere    | telomere    |
| GI_38201703-S | 296.3  | 310.4  | 386.1  | C9orf86  | <a href="#">NM_024718.2</a> | pp8875;FLJ10101;FLJ13045;bA216L13.9 | GTP          |             | protein     |
| GI_38201705-S | 307.4  | 373.3  | 391.6  | FLJ20073 | <a href="#">NM_017654.2</a> | KIAA2004                            |              |             |             |
| GI_38201709-I | 134.3  | 148.7  | 127.4  | DDX17    | <a href="#">NM_006386.3</a> | P72;RH70                            | RNA          | nucleus     | RNA         |
| GI_38201711-A | 6831.2 | 5311.6 | 4280.2 | DDX17    | <a href="#">NM_030881.2</a> | P72;RH70                            | RNA          | nucleus     | RNA         |
| GI_38201711-I | 152.1  | 197.4  | 155.6  | DDX17    | <a href="#">NM_030881.2</a> | P72;RH70                            | RNA          | nucleus     | RNA         |
| GI_38201712-S | 1254.4 | 1052.7 | 550.2  | EFNB3    | <a href="#">NM_001406.3</a> | EFL6;EPLG8;LERK8                    | transmem     | integral to | neurogene   |
| GI_38201713-S | 212.5  | 194.9  | 212.9  | ELAVL1   | <a href="#">NM_001419.2</a> | HUR;Hua;MeIG;ELAV1                  | mRNA 3'      |             | RNA         |
| GI_38201715-A | 131.9  | 150.9  | 135.7  | ELF5     | <a href="#">NM_001422.2</a> | ESE2                                | transcripti  |             | transcripti |
| GI_38201715-I | 188.6  | 204.9  | 197.7  | ELF5     | <a href="#">NM_001422.2</a> | ESE2                                | transcripti  |             | transcripti |
| GI_38201716-I | 109.1  | 126.1  | 120    | ELF5     | <a href="#">NM_198381.1</a> | ESE2                                | transcripti  |             | transcripti |
| GI_38202203-S | 1643.5 | 1436   | 1360.7 | ZFR      | <a href="#">NM_016107.3</a> |                                     | RNA          | nucleus     |             |
| GI_38202204-S | 372.3  | 469.4  | 510.7  | ZFYVE26  | <a href="#">NM_015346.2</a> | KIAA0321                            | zinc ion     |             |             |
| GI_38202206-S | 90.1   | 106.9  | 85.4   | MAOB     | <a href="#">NM_000898.3</a> | MGC26382                            | amine        | mitochond   | electron    |
| GI_38202208-S | 235.3  | 309.8  | 259.9  | MBD5     | <a href="#">NM_018328.3</a> | FLJ11113;FLJ30517;KIAA1461          | DNA          |             |             |
| GI_38202210-S | 431.9  | 505.7  | 760    | MGC4170  | <a href="#">NM_024312.3</a> | DKFZp762B226                        |              | membran     | cell        |
| GI_38202212-S | 264.8  | 312.4  | 297.8  | SEC10L1  | <a href="#">NM_006544.2</a> | EXOC5;SEC10;SEC10P;PRO1912;MGC476   | protein      | kinesin     | post-Golgi  |
| GI_38202213-S | 220.8  | 268    | 236.1  | SEC23A   | <a href="#">NM_006364.2</a> | MGC26267                            | protein      | COPII       | vesicle-    |
| GI_38202215-I | 113.8  | 135.3  | 125.2  | SRC      | <a href="#">NM_005417.3</a> | ASV;SRC1;c-SRC;p60-Src              | protein-     |             | signal      |
| GI_38202216-A | 459.2  | 562.3  | 500.1  | SRC      | <a href="#">NM_198291.1</a> | ASV;SRC1;c-SRC;p60-Src              | protein-     |             | signal      |
| GI_38202216-I | 205.2  | 220.8  | 192.4  | SRC      | <a href="#">NM_198291.1</a> | ASV;SRC1;c-SRC;p60-Src              | protein-     |             | signal      |
| GI_38202218-S | 892.6  | 876    | 633.4  | FLJ12178 | <a href="#">NM_025134.2</a> | KIAA0308                            | ATP          |             |             |
| GI_38202220-A | 132.6  | 308.9  | 284.3  | FLRT3    | <a href="#">NM_013281.2</a> |                                     | cell         | integral to | signal      |
| GI_38202221-I | 127.3  | 145    | 124.4  | FLRT3    | <a href="#">NM_198391.1</a> |                                     | cell         | integral to | signal      |
| GI_38202223-S | 85     | 98.2   | 91.2   | DLGAP2   | <a href="#">NM_004745.3</a> | DAP2;SAPAP2                         | protein      | neurofilam  | cell-cell   |
| GI_38202225-S | 326    | 395.9  | 398.7  | ZZEF1    | <a href="#">NM_015113.2</a> | ZZZ4;FLJ10821;KIAA0399              | zinc ion     |             |             |
| GI_38202227-S | 1106.5 | 1484.7 | 2072.1 | SCAP2    | <a href="#">NM_003930.3</a> | PRAP;RA70;SAPS;SKAP55R;MGC10411;M   | SH3/SH2      |             | protein     |
| GI_38202228-I | 104.4  | 104.1  | 96.3   | SIAT8D   | <a href="#">NM_005668.3</a> | PST;PST1;MGC34450;MGC61459;ST8SIA-  | sialyltransf | Golgi       | oligosacch  |
| GI_38202231-A | 181.5  | 610.5  | 2260.4 | T1A-2    | <a href="#">NM_198389.1</a> | GP36;HT1A-1                         |              | integral to |             |

|               |        |        |        |           |                             |                              |              |              |              |
|---------------|--------|--------|--------|-----------|-----------------------------|------------------------------|--------------|--------------|--------------|
| GI_38202233-S | 182.2  | 143.3  | 136.7  | T2BP      | <a href="#">NM_052864.2</a> | TIFA;MGC20791                |              |              |              |
| GI_38202236-A | 109.8  | 104.2  | 91.8   | TCF21     | <a href="#">NM_003206.2</a> | POD1                         | RNA          | nucleus      | mesoderm     |
| GI_38202236-I | 541.7  | 624.5  | 584.4  | TCF21     | <a href="#">NM_003206.2</a> | POD1                         | RNA          | nucleus      | mesoderm     |
| GI_38202238-I | 129.6  | 123.5  | 122.8  | TCF21     | <a href="#">NM_198392.1</a> | POD1                         | RNA          | nucleus      | mesoderm     |
| GI_38202240-I | 95.4   | 117    | 102.1  | WISP3     | <a href="#">NM_198239.1</a> | PPD;CCN6;LIBC;PPAC           |              | soluble      | oncogene     |
| GI_38202242-S | 5072.3 | 5322.8 | 5115.4 | YARS      | <a href="#">NM_003680.2</a> | YRS;YTS;tyrRS                | interleukin- | soluble      | tyrosyl-     |
| GI_38202243-S | 104.3  | 112.4  | 94.4   | SLC25A27  | <a href="#">NM_004277.2</a> | UCP4;FLJ33552                | uncouplin    | mitochond    | energy       |
| GI_38202245-S | 91.9   | 106.1  | 92.6   | SNPH      | <a href="#">NM_014723.2</a> | KIAA0374;MGC46096;bA314N13.5 | syntaxin-1   | kinesin      | neurotran    |
| GI_38202247-S | 2226.4 | 2012.5 | 1870.4 | STAT2     | <a href="#">NM_005419.2</a> | P113;ISGF-3;STAT113;MGC59816 | hematopoi    | nucleus      | JAK-STAT     |
| GI_38202248-S | 506    | 536.7  | 497.8  | SUHW2     | <a href="#">NM_080764.2</a> | 5'OY11.1                     | DNA          | nucleus      | regulation   |
| GI_38202249-S | 1159.1 | 1439.5 | 1623.6 | SUMF1     | <a href="#">NM_182760.2</a> | FGE                          | molecular    | endoplas     | glycosami    |
| GI_38202253-S | 1467.7 | 1690.2 | 1288.8 | PDAP1     | <a href="#">NM_014891.4</a> | PAP;PAP1;HASPP28             |              |              | signal       |
| GI_38202254-S | 4038   | 3898.5 | 3156.4 | TARS      | <a href="#">NM_152295.3</a> | ThrRS;MGC9344                | ATP          | soluble      | protein      |
| GI_38202256-A | 4277.6 | 4676.7 | 4325.1 | G2AN      | <a href="#">NM_198334.1</a> | KIAA0088                     | hydrolase    |              | carbohydr    |
| GI_38229312-I | 118.1  | 105.6  | 105.2  | CMIP      | <a href="#">NM_198390.1</a> | KIAA1694                     |              |              |              |
| GI_38230497-S | 134.5  | 165.5  | 148.2  | SACS      | <a href="#">NM_014363.3</a> | ARSACS;FLJ33280;KIAA0730     | chaperone    | cellular_co  | protein      |
| GI_38257138-S | 109    | 122.8  | 110.7  | PRKAR1B   | <a href="#">NM_002735.1</a> | PRKAR1                       | cAMP-        | cAMP-        | protein      |
| GI_38257140-S | 2765.2 | 2538.2 | 2591.7 | MAPK3     | <a href="#">NM_002746.1</a> | ERK1;PRKM3;P44ERK1;P44MAPK   | protein      | cellular_co  | chemotaxi    |
| GI_38257143-S | 109    | 121.6  | 113.9  | KCTD4     | <a href="#">NM_198404.1</a> | ba321C24.3                   | voltage-     | membran      | potassium    |
| GI_38257145-S | 407.9  | 434    | 693.1  | LOC157567 | <a href="#">NM_198401.1</a> |                              |              |              |              |
| GI_38257147-S | 99.1   | 94.4   | 86.4   | PAQR10    | <a href="#">NM_198403.1</a> |                              | lysine       | integral to  | cytolysis    |
| GI_38257150-I | 93.3   | 97.7   | 95.3   | NEDD4     | <a href="#">NM_198400.1</a> | KIAA0093                     | ubiquitin-   | intracellula | small        |
| GI_38257154-A | 560.8  | 508    | 576.9  | NEDD4     | <a href="#">NM_006154.1</a> | KIAA0093                     | ubiquitin-   | intracellula | small        |
| GI_38257154-I | 124.3  | 136.9  | 123.2  | NEDD4     | <a href="#">NM_006154.1</a> | KIAA0093                     | ubiquitin-   | intracellula | small        |
| GI_38257156-S | 601.9  | 735.3  | 788.5  | OSTF1     | <a href="#">NM_012383.3</a> | OSF;SH3P2;bA235O14.1         | protein      | intracellula | ossificatio  |
| GI_38261959-S | 82.5   | 93.7   | 88.1   | FLJ31196  | <a href="#">NM_152908.2</a> |                              | drug         | membran      | multidrug    |
| GI_38261961-S | 445.7  | 506.4  | 462.4  | ATF7IP    | <a href="#">NM_018179.3</a> | MCAF;p621;FLJ10139;FLJ10688  | protein      | nucleus      | DNA          |
| GI_38261963-S | 892    | 797.4  | 611.2  | ATF1      | <a href="#">NM_005171.2</a> | TREB36                       | transcripti  | nucleus      | regulation   |
| GI_38261964-A | 95.7   | 93.4   | 95.2   | ARPP-21   | <a href="#">NM_198399.1</a> |                              | molecular    | cellular_co  | biological_  |
| GI_38261964-I | 103    | 107.8  | 100.9  | ARPP-21   | <a href="#">NM_198399.1</a> |                              | molecular    | cellular_co  | biological_  |
| GI_38261966-S | 99.5   | 104.8  | 97.2   | ASB15     | <a href="#">NM_080928.2</a> | Asb-15                       |              |              | intracellula |
| GI_38261968-S | 1153.7 | 823.3  | 706.6  | APG12L    | <a href="#">NM_004707.2</a> | APG12;HAPG12                 | protein      | cytoplasm    | autophagy    |
| GI_38261970-I | 101.3  | 96.4   | 95.5   | ARPP-21   | <a href="#">NM_016300.3</a> |                              | molecular    | cellular_co  | biological_  |
| GI_38261972-S | 2556.9 | 2362.2 | 2305   | ADIPOR2   | <a href="#">NM_024551.2</a> | MGC4640;FLJ21432             | receptor     | integral to  | fatty acid   |
| GI_38327028-S | 2364.4 | 2872.6 | 2728.8 | UBE4A     | <a href="#">NM_004788.2</a> | E4;UFD2;KIAA0126             | ubiquitin    | ubiquitin    | ubiquitin-   |
| GI_38327030-A | 351.5  | 432.7  | 363.1  | UBE1DC1   | <a href="#">NM_024818.2</a> | FLJ23251                     | catalytic    |              | L-serine     |
| GI_38327031-I | 165.4  | 175.5  | 168.1  | UBE1DC1   | <a href="#">NM_198329.1</a> | FLJ23251                     | catalytic    |              | L-serine     |
| GI_38327033-S | 545.3  | 776    | 720.1  | UBE4B     | <a href="#">NM_006048.2</a> | E4;686;UFD2;HDNB1;KIAA0684   | ubiquitin    | ubiquitin    | response     |
| GI_38327035-S | 1353.4 | 1434.5 | 2240.3 | HAGH      | <a href="#">NM_005326.3</a> | GLO2;GLXII;HAGH1             | hydroxyac    |              |              |
| GI_38327036-S | 370.3  | 448.2  | 454.3  | HCN3      | <a href="#">NM_020897.1</a> | KIAA1535                     | cation       | integral to  | cation       |
| GI_38327038-I | 489.8  | 464.7  | 545    | HSPA4     | <a href="#">NM_002154.3</a> | RY;APG-2;hsp70;hsp70RY       | molecular    |              |              |
| GI_38327040-A | 336.9  | 407.5  | 387.5  | HSPA4     | <a href="#">NM_198431.1</a> | RY;APG-2;hsp70;hsp70RY       | molecular    |              |              |
| GI_38327514-S | 120.5  | 119.1  | 109.1  | BCL6B     | <a href="#">NM_181844.2</a> | BAZF;ZNF62                   | protein      | nucleus      | regulation   |
| GI_38327515-A | 118.2  | 133.8  | 142.4  | KBTBD3    | <a href="#">NM_152433.2</a> | BKLHD3;FLJ30685              | protein      |              |              |



|               |        |        |        |          |                             |                                    |               |             |              |
|---------------|--------|--------|--------|----------|-----------------------------|------------------------------------|---------------|-------------|--------------|
| GI_38327517-I | 155    | 156.4  | 164.1  | KBTBD3   | <a href="#">NM_198439.1</a> | BKLHD3;FLJ30685                    | protein       |             |              |
| GI_38327519-S | 85.3   | 90.4   | 91.7   | BMPER    | <a href="#">NM_133468.2</a> | CV2;CV-2                           | calcium       | extracellul |              |
| GI_38327520-S | 102.2  | 95.7   | 89.1   | ANGPTL1  | <a href="#">NM_004673.3</a> | ANG3;ARP1;AngY;ANGPT3;UNQ162       | receptor      |             |              |
| GI_38327521-S | 671.9  | 935.5  | 247.6  | ANKRD1   | <a href="#">NM_014391.2</a> | ALRP;CARP;C-193;CVARP;MCARP        | DNA           | nucleus     | defense      |
| GI_38327523-S | 110    | 113.7  | 113.2  | ATO7H    | <a href="#">NM_145178.2</a> | Math5                              |               |             |              |
| GI_38327524-I | 103    | 118.7  | 119.2  | CPM      | <a href="#">NM_001874.2</a> |                                    | carboxype     | peripheral  | embryoge     |
| GI_38327525-A | 231.4  | 288.3  | 260.5  | CPM      | <a href="#">NM_198320.1</a> |                                    | carboxype     | peripheral  | embryoge     |
| GI_38327528-I | 154.2  | 180.9  | 157.7  | INSIG1   | <a href="#">NM_198336.1</a> | CL-6;MGC1405                       | DNA           | nucleus     | metabolis    |
| GI_38327530-A | 486.3  | 1196.3 | 1073.5 | INSIG1   | <a href="#">NM_198337.1</a> | CL-6;MGC1405                       | DNA           | nucleus     | metabolis    |
| GI_38327532-S | 691.5  | 1288.4 | 770.4  | INSIG2   | <a href="#">NM_016133.2</a> | MGC26273                           |               |             |              |
| GI_38327534-S | 109.4  | 121.1  | 110.2  | INSL3    | <a href="#">NM_005543.2</a> | RLF;RLNL                           | insulin       | soluble     | spermatog    |
| GI_38327536-S | 1417.4 | 1213.9 | 1026.4 | INPP5A   | <a href="#">NM_005539.2</a> | 5PTASE                             | inositol-     | membran     | cell         |
| GI_38327538-S | 799.9  | 630.9  | 601.7  | INPP5E   | <a href="#">NM_019892.2</a> | PPI5PIV                            |               |             |              |
| GI_38327540-I | 107.7  | 104.9  | 104.1  | INPP5F   | <a href="#">NM_014937.2</a> | SAC2;hSAC2;MSTPO47;KIAA0966;MGC597 |               |             |              |
| GI_38327541-I | 168.1  | 154.8  | 163.6  | INPP5F   | <a href="#">NM_198330.1</a> | SAC2;hSAC2;MSTPO47;KIAA0966;MGC597 |               |             |              |
| GI_38327543-A | 171.5  | 179.2  | 132.2  | INPP5F   | <a href="#">NM_198331.1</a> | SAC2;hSAC2;MSTPO47;KIAA0966;MGC597 |               |             |              |
| GI_38327543-I | 419.6  | 473.7  | 350.1  | INPP5F   | <a href="#">NM_198331.1</a> | SAC2;hSAC2;MSTPO47;KIAA0966;MGC597 |               |             |              |
| GI_38327545-S | 442.4  | 555.5  | 499    | P2RXL1   | <a href="#">NM_005446.2</a> | P2X6;P2XM;P2RX6                    | channel/p     | integral to | small        |
| GI_38327546-I | 107    | 97.3   | 108.5  | P2RY10   | <a href="#">NM_014499.2</a> | P2Y10                              | rhodopsin-    | integral to | G-protein    |
| GI_38327547-A | 98.2   | 84.4   | 85.9   | P2RY10   | <a href="#">NM_198333.1</a> | P2Y10                              | rhodopsin-    | integral to | G-protein    |
| GI_38327549-S | 88.8   | 95.4   | 88.8   | P2RY5    | <a href="#">NM_005767.3</a> | P2Y5                               | rhodopsin-    | integral to | G-protein    |
| GI_38327551-A | 7339.8 | 7618.2 | 6590.1 | G3BP     | <a href="#">NM_198395.1</a> | 'HDH VIII'                         | ATP           | cytoplasm   | RAS          |
| GI_38327553-S | 123.4  | 122.9  | 121.8  | GABRA1   | <a href="#">NM_000806.3</a> |                                    | GABA-A        | integral to | gamma-       |
| GI_38327555-S | 115    | 127.1  | 118.2  | GALNT9   | <a href="#">NM_021808.2</a> | GALNAC-T9                          | polypeptid    | membran     | O-linked     |
| GI_38327557-S | 114.4  | 102.4  | 100.3  | GBP2     | <a href="#">NM_004120.3</a> |                                    | GTP           |             | immune       |
| GI_38327559-S | 1077   | 963.1  | 619.3  | STK35    | <a href="#">NM_080836.2</a> | CLIK1                              | cAMP-         |             | protein      |
| GI_38327560-S | 2113.5 | 1819.1 | 2585.5 | STK4     | <a href="#">NM_006282.2</a> | KRS2;MST1                          | protein       |             | heat         |
| GI_38327571-A | 920    | 939.5  | 1227.3 | STK6     | <a href="#">NM_198437.1</a> | AIK;ARK1;AURA;BTAK;STK15;MGC34538  | protein       | spindle     | oncogene     |
| GI_38327597-I | 357    | 539.7  | 540.3  | RGS12    | <a href="#">NM_002926.2</a> |                                    | GTPase        | peripheral  | regulation   |
| GI_38327598-I | 108.3  | 101.2  | 96.8   | RGS12    | <a href="#">NM_198227.1</a> |                                    | GTPase        | peripheral  | regulation   |
| GI_38327602-I | 108.2  | 112.7  | 104.2  | RGS12    | <a href="#">NM_198230.1</a> |                                    | GTPase        | peripheral  | regulation   |
| GI_38327606-I | 129.5  | 126.3  | 132.6  | RGS12    | <a href="#">NM_198432.1</a> |                                    | GTPase        | peripheral  | regulation   |
| GI_38327608-I | 104.5  | 112.8  | 108.7  | RGS12    | <a href="#">NM_198587.1</a> |                                    | GTPase        | peripheral  | regulation   |
| GI_38327613-A | 4518.8 | 4694.3 | 5706.4 | SDBCAG84 | <a href="#">NM_015966.2</a> | CGI-54;PRO0989;C20orf47;NY-BR-84   |               |             |              |
| GI_38327616-S | 243    | 307.2  | 267.3  | SLAMF6   | <a href="#">NM_052931.3</a> | KALI;NTBA;KALib;Ly108;NTB-A;SF2000 | receptor      |             |              |
| GI_38327617-A | 200.1  | 164.5  | 158.9  | TEX14    | <a href="#">NM_031272.2</a> |                                    | protein-      |             | protein      |
| GI_38327619-I | 84.6   | 96.4   | 95.4   | TEX14    | <a href="#">NM_198393.1</a> |                                    | protein-      |             | protein      |
| GI_38327621-S | 356    | 600.1  | 343    | TLE4     | <a href="#">NM_007005.3</a> | ESG;ESG4;BCE-1;E(spl)              | molecular     | nucleus     | signal       |
| GI_38327624-A | 1768.6 | 2036.4 | 1935.7 | CS       | <a href="#">NM_004077.2</a> |                                    | citrate (Si)- | mitochond   | tricarboxyli |
| GI_38327626-I | 123.3  | 140    | 139.4  | CS       | <a href="#">NM_198324.1</a> |                                    | citrate (Si)- | mitochond   | tricarboxyli |
| GI_38327628-I | 256.5  | 224.7  | 191.8  | C9orf85  | <a href="#">NM_182505.3</a> | MGC61599                           | DNA           | nucleus     | regulation   |
| GI_38327629-A | 878.8  | 1085.6 | 901.5  | C9orf85  | <a href="#">NM_198394.1</a> | MGC61599                           | DNA           | nucleus     | regulation   |
| GI_38327631-A | 987.2  | 2611.4 | 1620.6 | DDR1     | <a href="#">NM_001954.3</a> | CAK;DDR;NEP;PTK3;RTK6;TRKE;CD167;E | transmem      | integral to | cell         |
| GI_38327631-I | 87.1   | 92.2   | 93     | DDR1     | <a href="#">NM_001954.3</a> | CAK;DDR;NEP;PTK3;RTK6;TRKE;CD167;E | transmem      | integral to | cell         |

|               |        |        |        |            |                             |                                      |             |             |             |
|---------------|--------|--------|--------|------------|-----------------------------|--------------------------------------|-------------|-------------|-------------|
| GI_38327633-S | 2632.2 | 2360.5 | 2059.7 | DDX18      | <a href="#">NM_006773.3</a> | MrDb                                 | ATP         |             |             |
| GI_38327635-S | 1227.6 | 1255   | 1378.3 | C14orf4    | <a href="#">NM_024496.2</a> | KIAA1865                             | electron    | nucleus     | electron    |
| GI_38327636-S | 134.1  | 149.7  | 138.7  | CALML5     | <a href="#">NM_017422.3</a> | CLSP                                 | calcium     |             | epidermal   |
| GI_38327637-S | 651.7  | 919.8  | 763.5  | CREB3      | <a href="#">NM_006368.4</a> | LZIP;LUMAN;MGC15333;MGC19782         | translation | nucleus     | transcripti |
| GI_38327638-S | 328.4  | 441.2  | 367    | CRX        | <a href="#">NM_000554.2</a> | CRD;CORD2                            | transcripti | nucleus     | vision      |
| GI_38327639-S | 382.3  | 522.3  | 357.7  | CTSO       | <a href="#">NM_001334.2</a> | CTSO1                                | cysteine-   |             | proteolysis |
| GI_38327640-S | 104.1  | 113.6  | 110.6  | DLX3       | <a href="#">NM_005220.2</a> | TDO                                  | transcripti | nucleus     | skeletal    |
| GI_38327641-S | 241.3  | 234.5  | 274.3  | FLJ20195   | <a href="#">NM_017706.3</a> | FLJ21702                             |             |             |             |
| GI_38327643-S | 189.2  | 218.9  | 215.4  | KIAA1609   | <a href="#">NM_020947.2</a> | MGC25024                             |             |             |             |
| GI_38327648-S | 94     | 100.7  | 93.3   | ZP3        | <a href="#">NM_007155.4</a> | ZPC;ZP3A;ZP3B;HUMZP3;ZP3-372;ZP3-424 | receptor    | extracellul |             |
| GI_38327653-S | 337.2  | 434    | 402.5  | CHRNE      | <a href="#">NM_000080.2</a> | ACHRE                                | cation      | nicotinic   | synaptic    |
| GI_38327656-I | 82.9   | 239    | 89.8   | SULF2      | <a href="#">NM_018837.2</a> | HSULF-2;KIAA1247                     | sulfuric    | Golgi       | amino       |
| GI_38327657-A | 281.9  | 4861.8 | 365.8  | SULF2      | <a href="#">NM_198596.1</a> | HSULF-2;KIAA1247                     | sulfuric    | Golgi       | amino       |
| GI_38348182-S | 115.3  | 120.5  | 105.3  | HLXB9      | <a href="#">NM_005515.2</a> | HB9;SCRA1;HOXHB9                     | RNA         | nucleus     | humoral     |
| GI_38348195-S | 100.1  | 116.3  | 87.1   | FLJ43842   | <a href="#">NM_198440.1</a> | MGC71803                             |             |             |             |
| GI_38348197-S | 119    | 125.6  | 115    | FLJ40296   | <a href="#">NM_198441.1</a> |                                      | DNA         | nucleus     | regulation  |
| GI_38348199-S | 116.9  | 114.2  | 104    | FLJ45651   | <a href="#">NM_198442.1</a> |                                      |             |             |             |
| GI_38348201-S | 206.2  | 243.6  | 233.6  | UNQ2446    | <a href="#">NM_198443.1</a> |                                      |             |             |             |
| GI_38348203-S | 102.9  | 112.8  | 109.8  | UNQ9366    | <a href="#">NM_198444.1</a> |                                      |             |             |             |
| GI_38348205-S | 95.7   | 118.7  | 92     | FLJ45909   | <a href="#">NM_198445.1</a> |                                      |             |             |             |
| GI_38348207-S | 3679.4 | 5055.6 | 4747.3 | FLJ45459   | <a href="#">NM_198446.1</a> |                                      |             |             |             |
| GI_38348210-S | 90.1   | 93.1   | 86.5   | FLJ42654   | <a href="#">NM_198447.1</a> | MGC62027                             |             |             |             |
| GI_38348212-S | 191.9  | 157.5  | 133.1  | UNQ429     | <a href="#">NM_198448.1</a> |                                      |             |             |             |
| GI_38348214-S | 150.2  | 154    | 130.7  | MGC71745   | <a href="#">NM_198449.1</a> |                                      |             |             |             |
| GI_38348216-S | 168.7  | 212.8  | 176.1  | UNQ8193    | <a href="#">NM_198450.1</a> |                                      |             |             |             |
| GI_38348218-S | 160.8  | 158.5  | 135.7  | MGC21658   | <a href="#">NM_198451.1</a> |                                      |             |             |             |
| GI_38348220-S | 240    | 268.9  | 184.2  | MGC45419   | <a href="#">NM_198452.1</a> |                                      | ATP         |             | protein     |
| GI_38348231-S | 117.8  | 151.6  | 124.2  | DUSP7      | <a href="#">NM_001947.1</a> | MKPX;MKP-X;PYST2                     | protein     | cytoplasm   | MAPKKK      |
| GI_38348235-S | 368    | 414.2  | 408.2  | ZNF497     | <a href="#">NM_198458.1</a> | FLJ44773                             |             |             |             |
| GI_38348237-S | 122.7  | 122.9  | 119.9  | FLJ37099   | <a href="#">NM_198459.1</a> | dJ1156J9.1;DKFZp686G0351;DKFZp779P11 |             |             |             |
| GI_38348239-S | 125.8  | 147.6  | 128.3  | DKFZp686G0 | <a href="#">NM_198460.1</a> |                                      | GTPase      |             | immune      |
| GI_38348241-S | 111.3  | 147.6  | 169.8  | FLJ45273   | <a href="#">NM_198461.1</a> |                                      |             |             |             |
| GI_38348243-S | 175.1  | 188.5  | 176.8  | FLJ42117   | <a href="#">NM_198463.1</a> | FLJ42930                             |             |             |             |
| GI_38348247-S | 126.8  | 135.6  | 120    | UNQ9391    | <a href="#">NM_198464.1</a> |                                      |             |             |             |
| GI_38348249-S | 147.2  | 159.1  | 142.6  | DKFZp686A1 | <a href="#">NM_198465.1</a> |                                      | small       |             | protein     |
| GI_38348251-S | 106.3  | 99.6   | 100.1  | FLJ37183   | <a href="#">NM_198466.1</a> |                                      |             |             |             |
| GI_38348253-S | 282.6  | 304.2  | 295.8  | FLJ42526   | <a href="#">NM_198467.1</a> | FLJ45813;MGC71764                    |             |             |             |
| GI_38348255-S | 175.7  | 173.1  | 158    | C6orf167   | <a href="#">NM_198468.1</a> | FLJ46180;dJ39B17.2                   |             |             |             |
| GI_38348257-S | 115    | 132.7  | 112.2  | FLJ46909   | <a href="#">NM_198469.1</a> |                                      |             |             |             |
| GI_38348259-S | 150.4  | 179.7  | 170.6  | FLJ46061   | <a href="#">NM_198471.1</a> |                                      | DNA         | nucleus     | regulation  |
| GI_38348261-S | 375.1  | 430    | 343.9  | FLJ26016   | <a href="#">NM_198472.1</a> |                                      |             |             |             |
| GI_38348263-S | 222.4  | 271    | 239.9  | UNQ564     | <a href="#">NM_198474.1</a> |                                      |             |             |             |
| GI_38348265-S | 199.5  | 254.3  | 222    | MGC34829   | <a href="#">NM_198475.1</a> |                                      |             |             |             |
| GI_38348267-S | 1057.5 | 890.4  | 848    | FLJ41131   | <a href="#">NM_198476.1</a> |                                      |             |             |             |

|               |        |        |                 |                             |                     |             |                    |
|---------------|--------|--------|-----------------|-----------------------------|---------------------|-------------|--------------------|
| GI_38348269-S | 277.9  | 377.1  | 299 UNQ473      | <a href="#">NM_198477.1</a> |                     |             |                    |
| GI_38348271-S | 132.1  | 142.7  | 130.5 FLJ33600  | <a href="#">NM_198478.1</a> |                     |             |                    |
| GI_38348273-S | 113.2  | 129    | 112.1 FLJ40321  | <a href="#">NM_198479.1</a> |                     | transcripti | nucleus regulation |
| GI_38348275-S | 337.2  | 419.6  | 377.9 FLJ33710  | <a href="#">NM_198480.1</a> | FLJ39372            |             | nucleus            |
| GI_38348277-S | 85.2   | 98     | 80.7 UNQ3033    | <a href="#">NM_198481.1</a> |                     |             |                    |
| GI_38348279-A | 121    | 120.6  | 121.6 LOC284948 | <a href="#">NM_198482.1</a> |                     |             | intracellula       |
| GI_38348281-S | 239.6  | 293.2  | 267.4 FLJ46536  | <a href="#">NM_198483.1</a> |                     |             |                    |
| GI_38348283-S | 152.9  | 137.5  | 130.9 FLJ45246  | <a href="#">NM_198484.1</a> |                     |             |                    |
| GI_38348285-S | 88     | 101    | 102.5 FLJ41238  | <a href="#">NM_198485.1</a> | FLJ43694            |             |                    |
| GI_38348287-S | 1146.1 | 1153.3 | 1015.6 RPL7L1   | <a href="#">NM_198486.1</a> | MGC62004;dJ475N16.4 |             |                    |
| GI_38348289-S | 168.6  | 184.2  | 139 FLJ46072    | <a href="#">NM_198488.1</a> |                     |             |                    |
| GI_38348291-S | 133.4  | 187.2  | 180.1 DLNB14    | <a href="#">NM_198489.1</a> |                     |             |                    |
| GI_38348293-S | 117.2  | 135.7  | 111.7 FLJ44299  | <a href="#">NM_198491.1</a> |                     |             |                    |
| GI_38348295-S | 124.2  | 155.8  | 139.9 UNQ431    | <a href="#">NM_198492.1</a> |                     |             |                    |
| GI_38348297-S | 108.1  | 128.6  | 115.5 FLJ45235  | <a href="#">NM_198493.1</a> |                     |             |                    |
| GI_38348299-S | 133.4  | 143.5  | 130.8 FLJ16030  | <a href="#">NM_198494.1</a> |                     |             |                    |
| GI_38348301-S | 105    | 170.2  | 102.4 FLJ43692  | <a href="#">NM_198495.1</a> |                     |             |                    |
| GI_38348303-S | 130.8  | 159    | 136.5 AMACO     | <a href="#">NM_198496.1</a> | FLJ16213;FLJ45857   |             |                    |
| GI_38348309-S | 173    | 207.5  | 175.1 MGC50104  | <a href="#">NM_198498.1</a> |                     |             |                    |
| GI_38348311-S | 98.2   | 100.8  | 99.1 FLJ46156   | <a href="#">NM_198499.1</a> |                     |             |                    |
| GI_38348315-S | 91.9   | 97.2   | 91.6 FLJ42461   | <a href="#">NM_198501.1</a> |                     |             |                    |
| GI_38348319-S | 96.7   | 103.6  | 100.7 FLJ43826  | <a href="#">NM_198502.1</a> |                     |             |                    |
| GI_38348321-S | 411.9  | 550    | 605.3 UNQ1912   | <a href="#">NM_198507.1</a> | MGC17345            |             |                    |
| GI_38348323-S | 87.2   | 113.9  | 99 PAQR9        | <a href="#">NM_198504.1</a> | FLJ41938            |             |                    |
| GI_38348327-S | 145    | 181.4  | 135 FLJ44691    | <a href="#">NM_198506.1</a> |                     |             |                    |
| GI_38348329-S | 98.4   | 99.9   | 95.6 FLJ42925   | <a href="#">NM_198511.1</a> |                     |             |                    |
| GI_38348331-S | 111.2  | 102.1  | 109.4 FLJ44186  | <a href="#">NM_198508.1</a> |                     |             |                    |
| GI_38348335-S | 259    | 315.4  | 303.3 UNQ6369   | <a href="#">NM_198510.1</a> |                     |             |                    |
| GI_38348337-S | 148.1  | 235.6  | 168 MGC71806    | <a href="#">NM_198516.1</a> |                     |             |                    |
| GI_38348339-S | 88     | 93     | 95.4 FLJ25989   | <a href="#">NM_198512.1</a> |                     |             |                    |
| GI_38348341-S | 109.7  | 110.9  | 116.9 MGC12965  | <a href="#">NM_198519.1</a> |                     |             |                    |
| GI_38348343-S | 128.7  | 124.2  | 120.9 MGC35062  | <a href="#">NM_198515.1</a> |                     |             |                    |
| GI_38348345-S | 101.7  | 109.4  | 109.6 FLJ25323  | <a href="#">NM_198521.1</a> |                     | DNA         | nucleus regulation |
| GI_38348347-S | 100.4  | 104.2  | 95.3 FLJ00332   | <a href="#">NM_198517.1</a> | MGC46488            |             |                    |
| GI_38348349-S | 237.2  | 252.7  | 179 LOC374654   | <a href="#">NM_198525.1</a> | UNQ340              |             |                    |
| GI_38348351-S | 84     | 80     | 88.9 FLJ44112   | <a href="#">NM_198520.1</a> |                     |             |                    |
| GI_38348353-S | 131.3  | 161.2  | 140.3 FLJ46247  | <a href="#">NM_198529.1</a> | DKFZp434G2420       |             |                    |
| GI_38348355-S | 124.4  | 120.9  | 106.7 LOC161577 | <a href="#">NM_198524.1</a> | MGC40181            |             |                    |
| GI_38348359-S | 1021   | 888.4  | 932.3 MGC45386  | <a href="#">NM_198527.1</a> |                     |             | catalytic          |
| GI_38348363-S | 2720.1 | 3809   | 3361 FLJ46603   | <a href="#">NM_198530.1</a> |                     |             |                    |
| GI_38348365-S | 902.7  | 1525.2 | 1041.5 UNQ698   | <a href="#">NM_198538.1</a> |                     |             |                    |
| GI_38348367-S | 166.9  | 194.1  | 192.4 FLJ45778  | <a href="#">NM_198532.1</a> |                     |             |                    |
| GI_38348369-S | 159.3  | 171.8  | 156.8 UNQ644    | <a href="#">NM_198541.1</a> |                     |             |                    |
| GI_38348371-S | 157.4  | 155.3  | 130.1 FLJ44968  | <a href="#">NM_198537.1</a> |                     |             |                    |

|               |        |        |        |           |                             |                                        |                          |             |             |
|---------------|--------|--------|--------|-----------|-----------------------------|----------------------------------------|--------------------------|-------------|-------------|
| GI_38348377-S | 143.1  | 164.5  | 144.9  | LOC148872 | <a href="#">NM_198543.1</a> | MGC35434                               |                          |             |             |
| GI_38348381-S | 105.3  | 105.1  | 108.8  | LOC374955 | <a href="#">NM_198546.1</a> |                                        | calcium                  |             |             |
| GI_38348383-S | 227.1  | 256.6  | 256.4  | FLJ35093  | <a href="#">NM_198549.1</a> | DKFZp686M07166                         |                          |             |             |
| GI_38348385-S | 178.2  | 219.8  | 200.1  | FLJ36760  | <a href="#">NM_198550.1</a> |                                        |                          | nucleus     |             |
| GI_38348387-S | 119.1  | 121.6  | 111.4  | UNQ6077   | <a href="#">NM_198551.1</a> |                                        |                          |             |             |
| GI_38348389-S | 713.4  | 568.7  | 439.5  | MGC15887  | <a href="#">NM_198552.1</a> |                                        | DNA                      | nucleus     | regulation  |
| GI_38348391-S | 92.2   | 93.4   | 96.4   | FLJ30851  | <a href="#">NM_198553.1</a> |                                        |                          |             |             |
| GI_38348393-S | 88.4   | 102.8  | 91.8   | FLJ45645  | <a href="#">NM_198557.1</a> |                                        |                          |             |             |
| GI_38348395-S | 180    | 201.2  | 178.5  | MGC50811  | <a href="#">NM_198559.1</a> |                                        |                          |             |             |
| GI_38348397-S | 120.9  | 127.8  | 114.9  | LOC375323 | <a href="#">NM_198560.1</a> |                                        |                          |             |             |
| GI_38348399-S | 184.7  | 199.6  | 166.8  | FLJ43654  | <a href="#">NM_198562.1</a> | MGC61663;MGC62079                      |                          |             |             |
| GI_38348401-S | 111.6  | 123    | 130.5  | MGC52022  | <a href="#">NM_198563.1</a> |                                        |                          |             |             |
| GI_38348403-S | 128.9  | 125.9  | 122.2  | FLJ44290  | <a href="#">NM_198564.1</a> |                                        |                          |             |             |
| GI_38348405-S | 120.2  | 260.4  | 277.1  | UNQ3030   | <a href="#">NM_198565.1</a> | MGC50789                               |                          |             |             |
| GI_38348407-S | 288.7  | 208.7  | 214.5  | FLJ32363  | <a href="#">NM_198566.1</a> | MGC46448                               |                          |             |             |
| GI_38348409-S | 243.1  | 348    | 315.7  | FLJ44216  | <a href="#">NM_198567.1</a> | MGC33586;MGC40402                      |                          |             |             |
| GI_38348411-S | 82.5   | 80.4   | 78.6   | GJB7      | <a href="#">NM_198568.1</a> | CX25;MGC71746;bA136M9.1;connexin25     | connexon                 | connexon    | cell        |
| GI_38348413-S | 94.4   | 97     | 86.6   | UNQ739    | <a href="#">NM_198570.1</a> |                                        |                          |             |             |
| GI_38348415-S | 208.9  | 231.9  | 171.1  | FLJ39237  | <a href="#">NM_198571.1</a> | DKFZp547K159                           |                          |             |             |
| GI_38348417-S | 157.2  | 195.1  | 153.5  | MGC61633  | <a href="#">NM_198572.1</a> |                                        |                          |             |             |
| GI_38348419-S | 109.3  | 122.2  | 108.1  | UNQ470    | <a href="#">NM_198573.1</a> |                                        |                          |             |             |
| GI_38348427-S | 95.2   | 100.3  | 95.7   | FLJ46361  | <a href="#">NM_198577.1</a> |                                        |                          |             |             |
| GI_38348429-S | 115.9  | 106    | 105.9  | FLJ45829  | <a href="#">NM_198578.1</a> |                                        |                          |             |             |
| GI_38348431-S | 125    | 128.2  | 106    | FLJ41410  | <a href="#">NM_198581.1</a> | FLJ45877;KIAA2035                      |                          |             |             |
| GI_38348433-S | 93.1   | 92.1   | 90.3   | FLJ43374  | <a href="#">NM_198582.1</a> |                                        |                          |             |             |
| GI_38348435-S | 152.2  | 149.3  | 152.1  | CA13      | <a href="#">NM_198584.1</a> | CAXIII;FLJ37995;MGC59868               | carbonate                |             | one-        |
| GI_38348437-S | 89.9   | 137.2  | 104.8  | UNQ2492   | <a href="#">NM_198585.1</a> |                                        |                          |             |             |
| GI_38348726-I | 100.3  | 117.3  | 115.8  | THADA     | <a href="#">NM_022065.3</a> | GITA;FLJ21877;FLJ44016;FLJ44876;KIAA17 |                          |             |             |
| GI_38348728-S | 262.5  | 314.2  | 290    | C9orf93   | <a href="#">NM_173550.2</a> | FLJ39267;FLJ46740;bA778P13.1           |                          |             |             |
| GI_38348730-S | 137.9  | 166.9  | 146.9  | FLJ20506  | <a href="#">NM_017848.3</a> | CXorf17                                |                          |             |             |
| GI_38348732-A | 466.1  | 789.6  | 757.2  | THADA     | <a href="#">NM_198554.1</a> | GITA;FLJ21877;FLJ44016;FLJ44876;KIAA17 |                          |             |             |
| GI_38371736-S | 142.9  | 171.6  | 142.1  | KRTAP12-3 | <a href="#">NM_198697.1</a> | KRTAP12.3                              |                          |             |             |
| GI_38371738-S | 584.4  | 429.8  | 303.8  | RAB15     | <a href="#">NM_198686.1</a> |                                        | RAS small                |             | small       |
| GI_38371743-S | 125.6  | 168.6  | 142.7  | KRTAP12-4 | <a href="#">NM_198698.1</a> | KRTAP12.4                              |                          |             |             |
| GI_38372900-S | 505.6  | 534.1  | 643.9  | SP1       | <a href="#">NM_138473.2</a> |                                        | RNA                      | nucleus     | regulation  |
| GI_38372908-S | 1379.9 | 1149.5 | 1209.9 | C5orf7    | <a href="#">NM_016604.2</a> | 5qNCA;KIAA1082                         |                          |             |             |
| GI_38372910-S | 121.9  | 150.6  | 148.8  | DUSP16    | <a href="#">NM_030640.1</a> | MKP7;MKP-7;KIAA1700                    |                          |             |             |
| GI_38372914-S | 108    | 159.5  | 114.6  | C21orf63  | <a href="#">NM_058187.3</a> | B18;SUE21;PRED34                       | lectin [goid integral to |             | heterophili |
| GI_38372916-A | 311.4  | 409.5  | 348.6  | C1QTNF1   | <a href="#">NM_198593.1</a> | GIP;CTRP1;ZSIG37;FLJ90694              |                          | microfibril |             |
| GI_38372916-I | 128.4  | 129.7  | 117.5  | C1QTNF1   | <a href="#">NM_198593.1</a> | GIP;CTRP1;ZSIG37;FLJ90694              |                          | microfibril |             |
| GI_38372918-I | 194.8  | 232.1  | 222    | BSG       | <a href="#">NM_001728.2</a> | M6;OK;5F7;TCSF;CD147;EMMPRIN           | signal                   | peripheral  | cell        |
| GI_38372922-A | 2952.7 | 3833.5 | 2851.5 | BSG       | <a href="#">NM_198591.1</a> | M6;OK;5F7;TCSF;CD147;EMMPRIN           | signal                   | peripheral  | cell        |
| GI_38372928-S | 449.4  | 584.9  | 187.1  | BOC       | <a href="#">NM_033254.2</a> |                                        |                          |             |             |
| GI_38372929-S | 1143.2 | 1410.6 | 1402   | BCKDHA    | <a href="#">NM_000709.2</a> | MSUD1                                  | 3-methyl-2- alpha-       |             | metabolis   |

|               |        |        |        |          |                             |                                 |             |             |              |
|---------------|--------|--------|--------|----------|-----------------------------|---------------------------------|-------------|-------------|--------------|
| GI_38372930-A | 94.1   | 92.4   | 96.8   | BCAN     | <a href="#">NM_198427.1</a> | BEHAB;CSPG7;MGC13038            | sugar       | cell        |              |
| GI_38372930-I | 167.5  | 184.8  | 175.4  | BCAN     | <a href="#">NM_198427.1</a> | BEHAB;CSPG7;MGC13038            | sugar       | cell        |              |
| GI_38372934-I | 102.5  | 114.3  | 100.3  | BCAN     | <a href="#">NM_021948.3</a> | BEHAB;CSPG7;MGC13038            | sugar       | cell        |              |
| GI_38372936-A | 6983.3 | 7593.9 | 7240.1 | BC-2     | <a href="#">NM_014453.2</a> |                                 | molecular   |             |              |
| GI_38372937-S | 114.9  | 132.1  | 119.8  | ATP8A2   | <a href="#">NM_016529.3</a> | IB;ATP;ML-1;ATPIB;DKFZP434B1913 | tumor       | integral to | negative     |
| GI_38372939-S | 201.5  | 251.6  | 195    | AZGP1    | <a href="#">NM_001185.2</a> | ZAG;ZA2G                        | plasma      | soluble     | immune       |
| GI_38373667-S | 148.9  | 149.4  | 144.3  | P2RY8    | <a href="#">NM_178129.3</a> | P2Y8;MGC50878                   | rhodopsin-  | integral to | G-protein    |
| GI_38373668-I | 127.2  | 172.9  | 120    | SEC24C   | <a href="#">NM_004922.2</a> | KIAA0079                        | actin       | Golgi       | ER to        |
| GI_38373670-A | 2713.5 | 3121.2 | 3102.7 | SEC24C   | <a href="#">NM_198597.1</a> | KIAA0079                        | actin       | Golgi       | ER to        |
| GI_38373672-S | 114.9  | 132.9  | 133.4  | SYCP2    | <a href="#">NM_014258.2</a> | SCP2                            | DNA         | synaptone   | synaptone    |
| GI_38373674-A | 1300.5 | 1125   | 1307.4 | RAPGEF1  | <a href="#">NM_005312.2</a> | C3G;GRF2                        | guanyl-     |             | transmem     |
| GI_38373674-I | 93.9   | 96.6   | 90.5   | RAPGEF1  | <a href="#">NM_005312.2</a> | C3G;GRF2                        | guanyl-     |             | transmem     |
| GI_38373676-I | 105.3  | 116.9  | 113.3  | RAPGEF1  | <a href="#">NM_198679.1</a> | C3G;GRF2                        | guanyl-     |             | transmem     |
| GI_38373678-A | 96.1   | 101.6  | 89.3   | GYPE     | <a href="#">NM_002102.2</a> | GPE                             | blood       | integral to |              |
| GI_38373678-I | 86.8   | 98.9   | 98.4   | GYPE     | <a href="#">NM_002102.2</a> | GPE                             | blood       | integral to |              |
| GI_38373679-I | 95.8   | 123.3  | 114.5  | GYPE     | <a href="#">NM_198682.1</a> | GPE                             | blood       | integral to |              |
| GI_38373681-A | 376.4  | 439.6  | 383.9  | KIAA0720 | <a href="#">NM_020631.2</a> |                                 |             |             |              |
| GI_38373681-I | 120.7  | 114    | 115.4  | KIAA0720 | <a href="#">NM_020631.2</a> |                                 |             |             |              |
| GI_38373683-I | 96.3   | 109.8  | 90.9   | KIAA0720 | <a href="#">NM_198681.1</a> |                                 |             |             |              |
| GI_38373685-S | 172.2  | 178.5  | 163.4  | ACADSB   | <a href="#">NM_001609.2</a> | ACAD7;SBCAD;2-MEBCAD            | acyl-CoA    | mitochond   | fatty acid   |
| GI_38373686-S | 360    | 462.6  | 424.1  | AP1G1    | <a href="#">NM_001128.4</a> | ADTG;CLAPG1;MGC18255            | vesicle     | clathrin    | intracellula |
| GI_38373687-A | 119.4  | 132.3  | 114    | AQP4     | <a href="#">NM_001650.3</a> | MIWC;HMIWC2                     | water       | integral to | small        |
| GI_38373687-I | 91.6   | 92.1   | 83     | AQP4     | <a href="#">NM_001650.3</a> | MIWC;HMIWC2                     | water       | integral to | small        |
| GI_38373688-I | 121.1  | 114.4  | 109.7  | AQP4     | <a href="#">NM_004028.2</a> | MIWC;HMIWC2                     | water       | integral to | small        |
| GI_38373689-S | 908.7  | 1046.5 | 1045.1 | COPS4    | <a href="#">NM_016129.2</a> | MGC10899;MGC15160               |             |             |              |
| GI_38373691-S | 969    | 1070.4 | 987.2  | H3F3B    | <a href="#">NM_005324.3</a> | H3.3B                           | DNA         | chromoso    | nucleoso     |
| GI_38373692-S | 496.4  | 502.1  | 453.6  | SP3      | <a href="#">NM_003111.1</a> | SPR-2                           | DNA         | nucleus     | regulation   |
| GI_38373694-S | 568    | 362.4  | 238.4  | WASPIP   | <a href="#">NM_003387.3</a> | WIP;PRPL-2                      | profilin    | actin       | actin        |
| GI_38424072-S | 290.9  | 362.6  | 314.3  | PHLDB1   | <a href="#">NM_015157.1</a> | LL5A;FLJ00141;KIAA0638          |             |             |              |
| GI_38424080-A | 440.9  | 415.2  | 426.8  | SCDR10   | <a href="#">NM_198704.1</a> |                                 |             |             |              |
| GI_38454187-S | 151.4  | 146    | 148.1  | FLJ11016 | <a href="#">NM_018301.2</a> | FLJ13670                        |             |             |              |
| GI_38454193-S | 1078   | 1143.3 | 987.7  | 76P      | <a href="#">NM_014444.2</a> |                                 | structural  | centrosom   | microtubul   |
| GI_38454321-S | 153.2  | 182.3  | 157.5  | AMIGO3   | <a href="#">NM_198722.1</a> |                                 |             |             |              |
| GI_38454323-S | 488    | 641.7  | 564.4  | CYGB     | <a href="#">NM_134268.3</a> | HGB;STAP                        | globin      | cytoplasm   | oxygen       |
| GI_38454325-S | 129.4  | 145.6  | 115.8  | CD38     | <a href="#">NM_001775.2</a> |                                 | catalytic   | integral to | induction    |
| GI_38454327-S | 1536   | 2267.3 | 2807   | CDK5     | <a href="#">NM_004935.2</a> | PSSALRE                         | cyclin-     |             | cell         |
| GI_38455384-S | 117.9  | 199.9  | 122.2  | LAMP3    | <a href="#">NM_014398.2</a> | LAMP;DCLAMP;TSC403;DC-LAMP      |             | lysosomal   | oncogene     |
| GI_38455386-S | 82.7   | 94.6   | 83.4   | ENPP5    | <a href="#">NM_021572.4</a> |                                 | hydrolase   |             | nucleotide   |
| GI_38455387-S | 106.5  | 124    | 103.1  | FRZB     | <a href="#">NM_001463.2</a> | FRP-3;FRZB1;SFRP3;FRZB-PEN      | transmem    | membran     | skeletal     |
| GI_38455389-S | 121.4  | 139.1  | 128.2  | RASL12   | <a href="#">NM_016563.2</a> | RIS                             | small       |             | small        |
| GI_38455390-S | 1026.8 | 718.5  | 950.7  | RNASEH2A | <a href="#">NM_006397.2</a> | RNHL;RNHIA;RNASEHI              | ribonuclea  |             | DNA          |
| GI_38455392-S | 660.8  | 701.7  | 762.7  | NTHL1    | <a href="#">NM_002528.4</a> | NTH1;OCTS3                      | DNA-        | nucleus     | base-        |
| GI_38455393-S | 3206.5 | 2939.4 | 1962   | POLE4    | <a href="#">NM_019896.2</a> | p12                             | epsilon     | nucleus     |              |
| GI_38455395-S | 153.8  | 183.1  | 169.7  | NEUROG1  | <a href="#">NM_006161.2</a> | AKA;ngn1;Math4C;NEUROD3         | transcripti | nucleus     | regulation   |

|               |        |        |                  |                             |                                |             |              |            |
|---------------|--------|--------|------------------|-----------------------------|--------------------------------|-------------|--------------|------------|
| GI_38455397-S | 109.2  | 120.2  | 107 NKIR         | <a href="#">NM_139018.2</a> | IREM1                          |             |              |            |
| GI_38455399-S | 335.4  | 332.7  | 218.5 MADH5      | <a href="#">NM_005903.4</a> | JV5-1;SMAD5                    | receptor    | integral to  | TGFbeta    |
| GI_38455401-S | 205    | 246.5  | 228.3 LCN2       | <a href="#">NM_005564.2</a> | NGAL                           | binding     | soluble      | transport  |
| GI_38455403-S | 138.5  | 131.1  | 143.3 KLF1       | <a href="#">NM_006563.2</a> | EKLF                           | transcripti | nucleus      | histogene  |
| GI_38455404-S | 85     | 92.2   | 98.4 KNG         | <a href="#">NM_000893.2</a> |                                | cysteine    | cellular_co  | neuropepti |
| GI_38455405-S | 132.5  | 141.7  | 130.5 INDO       | <a href="#">NM_002164.3</a> | IDO;CD107B                     | electron    |              | tryptophan |
| GI_38455406-S | 120.5  | 126.9  | 125.3 JTB        | <a href="#">NM_006694.2</a> | PAR;hJT;HJTB;B PAR             |             | membran      | oncogene   |
| GI_38455407-S | 321    | 279.9  | 250.9 HRASLS     | <a href="#">NM_020386.2</a> | A-C1;H-REV107                  |             |              |            |
| GI_38455408-S | 1103.5 | 1588.2 | 1381.5 HKE2      | <a href="#">NM_014260.2</a> | KE-2;H2-KE2                    | chaperone   | prefoldin    | protein    |
| GI_38455409-I | 207.1  | 253    | 231.3 GHSR       | <a href="#">NM_198407.1</a> |                                | G-protein   | integral to  | G-protein  |
| GI_38455411-S | 398.4  | 278.6  | 249.7 GAJ        | <a href="#">NM_032117.2</a> | MND1                           |             |              |            |
| GI_38455412-S | 106.5  | 152.9  | 87.1 FPRL2       | <a href="#">NM_002030.3</a> | FMLPY;FPRH1;FPRH2;RMLP-R-I     | N-formyl    | integral to  | cell       |
| GI_38455414-S | 110.2  | 112.7  | 99.6 FLJ21736    | <a href="#">NM_024922.3</a> |                                | hydrolase   |              |            |
| GI_38455415-S | 300.2  | 237.8  | 234.7 FLT3LG     | <a href="#">NM_001459.2</a> |                                | receptor    | soluble      | positive   |
| GI_38455417-S | 100.8  | 117.3  | 96.5 FAM3D       | <a href="#">NM_138805.2</a> | EF7                            | cytokine    | extracellul  | negative   |
| GI_38455418-S | 204.8  | 244.7  | 216.3 ESX1L      | <a href="#">NM_153448.2</a> | ESXR1                          | transcripti | nucleus      | regulation |
| GI_38455419-S | 494.5  | 640    | 562.6 DSCR1L2    | <a href="#">NM_013441.2</a> | RCN3;MCIP3;hRCN3               | RNA         |              | embryoge   |
| GI_38455420-S | 116.7  | 108.7  | 99.1 CRL3        | <a href="#">NM_139017.3</a> | GPL;GLMR;GLM-R                 | receptor    |              |            |
| GI_38455423-S | 101.2  | 130    | 95.9 CLDN2       | <a href="#">NM_020384.2</a> |                                | structural  | tight        |            |
| GI_38455424-S | 269.7  | 307.1  | 252.8 CHRNB3     | <a href="#">NM_000749.2</a> |                                | nicotinic   | nicotinic    | synaptic   |
| GI_38455425-S | 146    | 156.5  | 183.4 CITED4     | <a href="#">NM_133467.2</a> |                                | DNA         | nucleus      | regulation |
| GI_38455426-S | 7823.4 | 7852.9 | 6372.9 CCT4      | <a href="#">NM_006430.2</a> | SRB;Cctd                       | chaperone   | cytoplasm    | protein    |
| GI_38455428-S | 223.5  | 282.4  | 258.2 BCMP11     | <a href="#">NM_176813.3</a> | HAG3;hAG-3                     |             |              |            |
| GI_38488691-S | 106.3  | 91.7   | 102.3 KIAA1985   | <a href="#">NM_024577.2</a> | CMT4C;CMTND;FLJ13605           |             |              |            |
| GI_38488711-S | 190.9  | 208.9  | 286.7 DKFZp761P1 | <a href="#">NM_152906.2</a> |                                |             |              |            |
| GI_38488717-S | 211    | 230.9  | 225.5 FLJ20309   | <a href="#">NM_017759.2</a> |                                |             |              |            |
| GI_38488719-S | 372.7  | 287.6  | 226.2 DGCR8      | <a href="#">NM_022720.4</a> | Gy1;FLJ21774;FLJ21886;FLJ22127 | double-     | intracellula |            |
| GI_38488723-S | 123.3  | 143.2  | 124.6 TFF2       | <a href="#">NM_005423.2</a> | SP;SML1                        |             |              | defense    |
| GI_38488726-S | 792.9  | 774    | 849.2 MGC12197   | <a href="#">NM_016625.2</a> |                                |             |              |            |
| GI_38488756-S | 141    | 170.7  | 156.7 ATP5L2     | <a href="#">NM_198822.1</a> | ATP5K2;dJ222E13.5              |             |              |            |
| GI_38488766-S | 234.7  | 278.4  | 279.3 LOC375449  | <a href="#">NM_198828.1</a> |                                |             |              |            |
| GI_38490530-S | 1643.4 | 1673.2 | 1194 SFRS14      | <a href="#">NM_014884.1</a> | KIAA0365                       |             |              |            |
| GI_38490536-S | 109.7  | 136.2  | 113.9 MGC9726    | <a href="#">NM_177403.3</a> | RAB7;MGC16212                  | small       |              | small      |
| GI_38490555-S | 2621.3 | 1535.7 | 1930.3 FLJ20847  | <a href="#">NM_017966.3</a> |                                |             |              |            |
| GI_38490687-S | 119.2  | 134.6  | 135.1 IGSF10     | <a href="#">NM_178822.3</a> | FLJ25972                       | vascular    |              | protein    |
| GI_38492354-S | 126.2  | 133.4  | 130.6 PDHA2      | <a href="#">NM_005390.3</a> | PDHAL                          | pyruvate    | mitochond    | glycolysis |
| GI_38492355-S | 566.2  | 448.7  | 526.4 POLD3      | <a href="#">NM_006591.1</a> | P66;P68;KIAA0039               | delta DNA   | delta DNA    | DNA        |
| GI_38492357-S | 658.4  | 665    | 649.4 KIAA0632   | <a href="#">NM_015545.2</a> |                                |             |              |            |
| GI_38502311-S | 109.2  | 122.3  | 96.6 LOC283514   | <a href="#">NM_198849.1</a> |                                |             |              |            |
| GI_38502313-S | 130    | 126    | 105.1 LOC348645  | <a href="#">NM_198851.1</a> |                                |             |              |            |
| GI_38502315-I | 182.1  | 209.3  | 187.8 ZBP2       | <a href="#">NM_198844.1</a> | ZPBPL;MGC41930                 |             |              |            |
| GI_38502317-S | 92     | 95.6   | 82.6 LOC284345   | <a href="#">NM_198850.1</a> |                                |             |              |            |
| GI_38502320-S | 89.1   | 90.1   | 86 FLJ40411      | <a href="#">NM_198852.1</a> |                                |             |              |            |
| GI_38502322-S | 477.6  | 437.1  | 522.7 C9orf10OS  | <a href="#">NM_198841.1</a> | FLJ31534                       |             |              |            |

|               |         |        |        |          |                             |                                   |                      |                         |
|---------------|---------|--------|--------|----------|-----------------------------|-----------------------------------|----------------------|-------------------------|
| GI_38504662-S | 108.4   | 119    | 110.9  | SIGLEC6  | <a href="#">NM_001245.2</a> | CD33L;OBBP1;CD33L1;SIGLEC-6       | lectin [goid membran | cell-cell               |
| GI_38504666-I | 139     | 160.7  | 137.3  | SFTPB    | <a href="#">NM_198843.1</a> | SP-B;PSP-B;SFTB3;SFTP3            | surfactant           | extracellul respiratory |
| GI_38504670-S | 116     | 127.3  | 98.3   | SCRN3    | <a href="#">NM_024583.2</a> | SES3;FLJ23142                     | dipeptidas           | proteolysis             |
| GI_38504672-S | 1154.1  | 930.2  | 1255.4 | SERPINB8 | <a href="#">NM_002640.3</a> | PI8;CAP2                          | protein              | cytosol                 |
| GI_38505154-A | 2277    | 2149.3 | 2776.2 | TCEA2    | <a href="#">NM_003195.4</a> | TFIIS                             | transcripti          | transcripti transcripti |
| GI_38505155-I | 110.6   | 119.4  | 109.3  | TCEA2    | <a href="#">NM_198723.1</a> | TFIIS                             | transcripti          | transcripti transcripti |
| GI_38505157-S | 151.3   | 168.5  | 154.8  | TCF15    | <a href="#">NM_004609.2</a> | EC2;PARAXIS                       | RNA                  | nucleus mesoderm        |
| GI_38505158-S | 329.4   | 295    | 262.6  | TCFL5    | <a href="#">NM_006602.2</a> | CHA;E2BP-1;MGC46135               | transcripti          | nucleus spermatog       |
| GI_38505160-S | 92      | 97     | 91.1   | TDRD1    | <a href="#">NM_198795.1</a> | FLJ21082                          | nucleic              |                         |
| GI_38505162-I | 206.3   | 157.9  | 106.7  | RAC1     | <a href="#">NM_018890.2</a> | TC-25;p21-Rac1                    | GTPase               | peripheral response     |
| GI_38505163-A | 10907.2 | 9981.5 | 9348.1 | RAC1     | <a href="#">NM_006908.3</a> | TC-25;p21-Rac1                    | GTPase               | peripheral response     |
| GI_38505164-I | 132     | 151.9  | 147.3  | RAC1     | <a href="#">NM_198829.1</a> | TC-25;p21-Rac1                    | GTPase               | peripheral response     |
| GI_38505166-S | 312.8   | 465.1  | 485.5  | RARG     | <a href="#">NM_000966.3</a> | RARC;NR1B3                        | retinoic             | developm                |
| GI_38505169-S | 192.6   | 206    | 201.8  | RASGRF2  | <a href="#">NM_006909.1</a> | GRF2;RAS-GRF2                     | guanyl-              | activation              |
| GI_38505179-I | 99.1    | 91.4   | 93.6   | PTGER3   | <a href="#">NM_198715.1</a> | EP3;MGC27302                      | prostaglan           | nuclear G-protein       |
| GI_38505185-I | 101.9   | 123.6  | 103.6  | PTGER3   | <a href="#">NM_198718.1</a> | EP3;MGC27302                      | prostaglan           | nuclear G-protein       |
| GI_38505187-I | 101.1   | 94.2   | 95.6   | PTGER3   | <a href="#">NM_198719.1</a> | EP3;MGC27302                      | prostaglan           | nuclear G-protein       |
| GI_38505189-I | 103.8   | 96.4   | 99.4   | PTGER3   | <a href="#">NM_198720.1</a> | EP3;MGC27302                      | prostaglan           | nuclear G-protein       |
| GI_38505191-S | 131.7   | 131.3  | 124.3  | PTGDR    | <a href="#">NM_000953.2</a> | DP;MGC49004                       | rhodopsin-           | integral to G-protein   |
| GI_38505192-S | 285.5   | 333.7  | 294.6  | PTGDS    | <a href="#">NM_000954.5</a> | PDS;PGD2;PGDS;PGDS2               | prostaglan           | membran transport       |
| GI_38505193-S | 142.2   | 154.3  | 150.5  | PTGER1   | <a href="#">NM_000955.2</a> | EP1                               | prostaglan           | integral to G-protein   |
| GI_38505195-S | 190.7   | 302.2  | 1310   | PTGES    | <a href="#">NM_004878.3</a> | PGES;PIG12;PP102;PP1294;MGST-     |                      | membran prostaglan      |
| GI_38505196-S | 127.7   | 136.6  | 117.1  | PTGER4   | <a href="#">NM_000958.2</a> | EP4;EP4R                          | prostaglan           | integral to G-protein   |
| GI_38505200-S | 214.4   | 247.8  | 165.6  | PCTK3    | <a href="#">NM_002596.1</a> | PCTAIRE;PCTAIRE3                  | protein              | cellular_co protein     |
| GI_38505202-S | 84.2    | 93     | 95.4   | PLDN     | <a href="#">NM_012388.2</a> | PA;PALLID                         | syntaxin-            | cellular_co synaptic    |
| GI_38505203-S | 119.3   | 117.3  | 95.4   | PRRX2    | <a href="#">NM_016307.3</a> | PMX2;PRX2;MGC19843                | transcripti          | nuclear regulation      |
| GI_38505204-S | 469.4   | 582.6  | 467    | PTEN     | <a href="#">NM_000314.2</a> | BZS;MHAM;TEP1;MMAC1;PTEN1;MGC1122 | inositol/ph          | cytoplasm regulation    |
| GI_38505206-S | 233.9   | 198.2  | 222.9  | FLJ22624 | <a href="#">NM_024808.2</a> |                                   |                      |                         |
| GI_38505208-S | 550.9   | 541.9  | 582.9  | FLJ22794 | <a href="#">NM_022074.2</a> | KIAA1895                          |                      |                         |
| GI_38505212-S | 188.4   | 189.3  | 172.1  | FLJ21940 | <a href="#">NM_022828.2</a> | FLJ10053;DKFZp564A186             |                      |                         |
| GI_38505214-S | 169.4   | 169.6  | 153.4  | FLJ21941 | <a href="#">NM_025040.2</a> |                                   |                      |                         |
| GI_38505216-S | 97.5    | 104.8  | 96.4   | FLJ21963 | <a href="#">NM_024560.2</a> |                                   | catalytic            | metabolis               |
| GI_38505217-S | 1203.7  | 931.2  | 491.1  | FLJ12592 | <a href="#">NM_032169.3</a> |                                   | acyl-CoA             | electron                |
| GI_38505219-S | 94.1    | 128.5  | 98.2   | FLJ20581 | <a href="#">NM_017888.2</a> |                                   | catalytic            | metabolis               |
| GI_38505221-S | 1266.5  | 1789.5 | 1320.3 | FLJ20793 | <a href="#">NM_019022.3</a> | KIAA1830                          | calcium              | electron                |
| GI_38505223-S | 340     | 300.7  | 303    | METTL4   | <a href="#">NM_022840.2</a> | HsT661;FLJ23017                   |                      |                         |
| GI_38505225-S | 140.2   | 140.3  | 140.1  | FLJ23311 | <a href="#">NM_024680.2</a> |                                   |                      |                         |
| GI_38505264-S | 573.6   | 559.3  | 623    | DNCLI2   | <a href="#">NM_006141.2</a> | LIC2                              | adenosine            | cytoplasm microtubul    |
| GI_38505265-S | 2098.9  | 1435.1 | 1932.5 | DNTTIP1  | <a href="#">NM_052951.2</a> | Tdif1;C20orf167;dJ447F3.4         |                      | nucleus                 |
| GI_38505291-I | 91.2    | 91.1   | 90     | CACNA1G  | <a href="#">NM_198396.1</a> | NBR13;Ca(V)T.1                    | low                  | voltage- small          |
| GI_38505293-I | 108.8   | 132.7  | 127    | CACNA1G  | <a href="#">NM_198397.1</a> | NBR13;Ca(V)T.1                    | low                  | voltage- small          |
| GI_38524584-S | 3240.5  | 3313.6 | 3162.2 | NDUFS7   | <a href="#">NM_024407.3</a> | PSST;FLJ45860;FLJ46880            | NADH                 | mitochond               |
| GI_38524586-S | 178.5   | 182.6  | 167.2  | FLJ43855 | <a href="#">NM_198857.1</a> |                                   |                      |                         |
| GI_38524588-S | 462     | 728.3  | 312.6  | FLJ43070 | <a href="#">NM_152286.2</a> | FLJ31318;FLJ44279                 |                      |                         |

|               |        |        |        |          |                             |                                      |                                |
|---------------|--------|--------|--------|----------|-----------------------------|--------------------------------------|--------------------------------|
| GI_38524590-S | 97.2   | 92     | 85.8   | IMP5     | <a href="#">NM_175882.1</a> | peptidase                            | proteolysis                    |
| GI_38524593-S | 1335.7 | 1335.9 | 1106.4 | TIPARP   | <a href="#">NM_015508.2</a> | DDF1;DKFZP434J214;DKFZp686N0351      | nucleic                        |
| GI_38524599-S | 262.5  | 288.8  | 251.1  | FLJ14011 | <a href="#">NM_022103.2</a> |                                      | nucleus                        |
| GI_38524611-S | 424.2  | 530.3  | 452    | TRIM50C  | <a href="#">NM_198853.1</a> |                                      | zinc ion intracellular         |
| GI_38524613-S | 137.8  | 134.6  | 132.2  | MGC4728  | <a href="#">NM_198542.1</a> |                                      |                                |
| GI_38524615-S | 764.2  | 487.4  | 396.4  | SLC27A1  | <a href="#">NM_198580.1</a> | FATP;FATP1;MGC71751                  | catalytic metabolis            |
| GI_38524617-S | 731.8  | 855.1  | 612.5  | FMNL2    | <a href="#">NM_052905.1</a> | FHOD2;KIAA1902                       | actin nucleus cytokinesi       |
| GI_38524619-S | 448.9  | 495.4  | 299.5  | PRICKLE2 | <a href="#">NM_198859.1</a> | DKFZp686D143                         |                                |
| GI_38524621-S | 1118.8 | 1104.4 | 996.1  | FNBP1    | <a href="#">NM_015033.1</a> | FBP17;KIAA0554                       | DNA nucleus regulation         |
| GI_38564321-S | 133.7  | 161.1  | 142    | ZNF154   | <a href="#">NM_003444.1</a> | pHZ-92                               | transcripti nucleus regulation |
| GI_38564323-S | 275.8  | 246.9  | 250.6  | NME6     | <a href="#">NM_005793.3</a> | NM23-H6;IPIA-ALPHA                   | nucleoside cellular_co GTP     |
| GI_38564324-S | 212.1  | 254    | 217.2  | FLJ40243 | <a href="#">NM_173489.2</a> |                                      |                                |
| GI_38564326-S | 113    | 107.8  | 106    | THAP9    | <a href="#">NM_024672.2</a> | FLJ23320;FLJ34093                    |                                |
| GI_38566701-S | 176.4  | 136.3  | 180.1  | ZNF285   | <a href="#">NM_152354.2</a> | FLJ30747                             | nucleus                        |
| GI_38568177-S | 207.4  | 214.4  | 213.7  | KIAA0467 | <a href="#">NM_015284.1</a> | FLJ23425                             | copper, superoxid              |
| GI_38569232-S | 92.1   | 96.1   | 87.7   | INSL5    | <a href="#">NM_005478.3</a> | PRO182;UNQ156                        | hormone extracellul physiologi |
| GI_38569393-S | 879.1  | 872.1  | 790.2  | IKBKAP   | <a href="#">NM_003640.2</a> | FD;DYS;IKAP                          | phosphory protein              |
| GI_38569395-S | 98.6   | 121.8  | 94.6   | INSL6    | <a href="#">NM_007179.2</a> | RIF1                                 | hormone extracellul physiologi |
| GI_38569397-S | 545    | 414.7  | 250.6  | ITGA10   | <a href="#">NM_003637.3</a> |                                      | collagen integrin cell-matrix  |
| GI_38569399-S | 331.4  | 455.1  | 623.3  | ITPKB    | <a href="#">NM_002221.2</a> | IP3K;IP3K-B                          | inositol- signal               |
| GI_38569401-S | 884.8  | 1264.5 | 1137.9 | ARFIP2   | <a href="#">NM_012402.2</a> | POR1                                 | GTP small                      |
| GI_38569402-S | 717.8  | 1011.6 | 891.6  | ARL3     | <a href="#">NM_004311.2</a> | ARFL3                                | GTP small                      |
| GI_38569403-S | 1413.9 | 1745.5 | 1278.2 | ARL7     | <a href="#">NM_005737.3</a> | LAK                                  | small nucleus small            |
| GI_38569406-I | 115.5  | 102.1  | 115.5  | ARSB     | <a href="#">NM_198709.1</a> | ASB;G4S;MPS6                         | arylsulfata lysosome lysosomal |
| GI_38569412-I | 85.1   | 84     | 72.4   | APBA2BP  | <a href="#">NM_031231.2</a> | NIP1;XB51;EFCBP3;NECAB3;SYTIP2;dJ63M | calcium endoplas protein       |
| GI_38569414-I | 428.5  | 444.8  | 619.8  | APBA2BP  | <a href="#">NM_031232.2</a> | NIP1;XB51;EFCBP3;NECAB3;SYTIP2;dJ63M | calcium endoplas protein       |
| GI_38569416-S | 275.7  | 321.9  | 260.9  | AARSL    | <a href="#">NM_020745.1</a> | KIAA1270;bA444E17.1                  | ATP alanyl-                    |
| GI_38569418-S | 93     | 98.7   | 95.8   | AAT1     | <a href="#">NM_033364.2</a> |                                      |                                |
| GI_38569420-S | 3323.2 | 3879.8 | 3443.8 | ACLY     | <a href="#">NM_001096.2</a> | ATPCL;CLATP                          | ATP citrate ATP                |
| GI_38569424-S | 107.4  | 109    | 115.3  | ALAD     | <a href="#">NM_000031.3</a> | ALADH;MGC5057                        | porphobili heme                |
| GI_38569425-S | 143.7  | 152.1  | 107.2  | ANKRD5   | <a href="#">NM_022096.4</a> | FLJ21669;dJ839B4.6                   | calcium                        |
| GI_38569429-S | 194.8  | 409.6  | 149.5  | ATF7IP2  | <a href="#">NM_024997.2</a> | FLJ12668                             |                                |
| GI_38569431-A | 172.3  | 198.4  | 197.6  | B1       | <a href="#">NM_014451.2</a> | PTHB1                                |                                |
| GI_38569433-I | 95.1   | 117.8  | 91.1   | B1       | <a href="#">NM_198428.1</a> | PTHB1                                |                                |
| GI_38569437-S | 304.8  | 381.1  | 315    | BCAS4    | <a href="#">NM_017843.2</a> | BHLHB4;FLJ20495                      | cell growth                    |
| GI_38569441-S | 1241.9 | 1360.3 | 866.4  | BCAT1    | <a href="#">NM_005504.3</a> | BCT1;ECA39;MECA39                    | branched- cytosol branched     |
| GI_38569442-I | 236.5  | 252.9  | 232.9  | BMPR2    | <a href="#">NM_001204.4</a> | BMR2;PPH1;BMPR3;BRK-3;T-ALK;BMPR-II  | protein integral to transmem   |
| GI_38569443-A | 283.4  | 323.4  | 291.1  | BMPR2    | <a href="#">NM_033346.2</a> | BMR2;PPH1;BMPR3;BRK-3;T-ALK;BMPR-II  | protein integral to transmem   |
| GI_38569444-S | 293.6  | 324.8  | 300.9  | ZNF211   | <a href="#">NM_006385.2</a> | ZNF-25;ZNFC25;C2H2-25;CH2H2-25       | transcripti nucleus regulation |
| GI_38569448-S | 102.4  | 106.5  | 110.5  | XCL2     | <a href="#">NM_003175.2</a> | SCM1B;SCYC2;SCM-1b                   | chemokin soluble circulation   |
| GI_38569451-S | 173.7  | 208.7  | 200.2  | VCIP135  | <a href="#">NM_025054.3</a> | FLJ23132;KIAA1850                    |                                |
| GI_38569452-I | 175.9  | 222.8  | 164.5  | STARD5   | <a href="#">NM_030574.2</a> | MGC10327                             | cholestero lipid               |
| GI_38569454-S | 102.2  | 90.2   | 96.8   | SLC9A2   | <a href="#">NM_003048.3</a> | NHE2                                 | sodium:hy integral to sodium   |
| GI_38569455-A | 148.7  | 177.8  | 152.1  | STARD5   | <a href="#">NM_181900.2</a> | MGC10327                             | cholestero lipid               |



|               |        |        |        |            |                             |                                   |               |             |             |
|---------------|--------|--------|--------|------------|-----------------------------|-----------------------------------|---------------|-------------|-------------|
| GI_38569458-S | 98.6   | 106    | 97.7   | SLC6A7     | <a href="#">NM_014228.2</a> | PROT                              | neurotran     | membran     | L-proline   |
| GI_38569459-S | 140    | 180.7  | 173.9  | SIK2       | <a href="#">NM_015191.1</a> | KIAA0781;DKFZp434K1115            | protein-      |             | protein     |
| GI_38569461-S | 178.7  | 250.8  | 219.1  | SLC12A2    | <a href="#">NM_001046.2</a> | BSC;BSC2;NKCC1                    | sodium:ch     | membran     | small       |
| GI_38569462-S | 560.1  | 635.4  | 502.9  | RRAS2      | <a href="#">NM_012250.3</a> | TC21                              | RAS small     | endoplas    | oncogene    |
| GI_38569463-S | 295.5  | 272.4  | 295.2  | SASH1      | <a href="#">NM_015278.2</a> | KIAA0790;dJ323M4.1                | DNA           | nucleus     | negative    |
| GI_38569465-S | 224.6  | 248.3  | 205.3  | ROD1       | <a href="#">NM_005156.3</a> |                                   | RNA           |             | embryoge    |
| GI_38569467-S | 987    | 816.2  | 748.7  | RPF1       | <a href="#">NM_025065.5</a> | FLJ12475                          |               |             |             |
| GI_38569468-S | 532.3  | 549.2  | 374.6  | RAI16      | <a href="#">NM_022749.4</a> | FLJ21801                          |               |             |             |
| GI_38569470-S | 2739.9 | 2793.7 | 2681.8 | MUF1       | <a href="#">NM_006369.3</a> |                                   |               |             |             |
| GI_38569472-S | 1945.2 | 2484.9 | 2640.2 | NDUFB1     | <a href="#">NM_004545.3</a> | MNLL;CI-SGDH                      | NADH          | NADH        |             |
| GI_38569474-S | 282.6  | 337.5  | 272    | MTX1       | <a href="#">NM_002455.2</a> | MTX;MTXN                          |               | integral to |             |
| GI_38569478-S | 114.9  | 100.1  | 108.2  | KRTAP13-2  | <a href="#">NM_181621.2</a> | KAP13-2                           |               |             |             |
| GI_38569479-S | 114.4  | 112.2  | 105.4  | MRTF-B     | <a href="#">NM_014048.3</a> | MKL2;NPD001;KIAA1243              |               |             |             |
| GI_38569481-S | 616.1  | 1504.7 | 1088.7 | KIAA1324   | <a href="#">NM_020775.2</a> |                                   |               |             |             |
| GI_38569483-S | 346.7  | 282.3  | 442.1  | KIF21A     | <a href="#">NM_017641.2</a> | FEOM1;CFEOM1;FLJ20052;KIAA1708    | ATP           | kinesin     | microtubul  |
| GI_38569485-S | 515.8  | 520    | 454.6  | KIAA1190   | <a href="#">NM_145166.2</a> | DKFZp434N0615                     | DNA           | nucleus     | regulation  |
| GI_38569486-S | 132.7  | 144    | 139.5  | KIAA1244   | <a href="#">NM_020340.2</a> |                                   |               |             |             |
| GI_38569492-S | 545.8  | 540.5  | 482.1  | KCNH3      | <a href="#">NM_012284.1</a> | BEC1;ELK2;Kv12.2;KIAA1282         | voltage-      | voltage-    | potassium   |
| GI_38569498-S | 189.4  | 218.7  | 197.9  | DPCR1      | <a href="#">NM_080870.2</a> | PBLT                              |               |             |             |
| GI_38569501-I | 1306.3 | 1385.6 | 1177.5 | DKFZP434I1 | <a href="#">NM_015496.3</a> | MSTP054                           | nucleic       |             |             |
| GI_38569502-I | 382    | 455.5  | 333.4  | DDX52      | <a href="#">NM_152300.2</a> | ROK1                              | ATP           | nucleus     |             |
| GI_38569504-A | 454.1  | 464.1  | 338.6  | DDX52      | <a href="#">NM_007010.2</a> | ROK1                              | ATP           | nucleus     |             |
| GI_38569506-S | 203    | 205.6  | 194.2  | DACT1      | <a href="#">NM_016651.4</a> | DPR1;FRODO;HDPR1;DAPPER;THYEX3;D  |               | kinesin     |             |
| GI_38570041-S | 102.6  | 105.8  | 104    | CLDN5      | <a href="#">NM_003277.2</a> | AWAL;BEC1;TMVCF;CPETRL1           | structural    | tight       |             |
| GI_38570051-S | 293    | 356.4  | 306.7  | C14orf49   | <a href="#">NM_152592.2</a> | FLJ25605;c14_5734                 |               |             |             |
| GI_38570053-S | 286.2  | 254.8  | 275.4  | C6orf149   | <a href="#">NM_020408.3</a> | CGI-203                           |               |             |             |
| GI_38570057-S | 96.9   | 112.2  | 104.2  | C6orf97    | <a href="#">NM_025059.2</a> | FLJ23305;bA282P11.1               |               |             |             |
| GI_38570061-S | 260.9  | 270.2  | 270    | C7orf20    | <a href="#">NM_015949.2</a> | CGI-20                            |               |             |             |
| GI_38570063-S | 105.1  | 115.6  | 104    | C7orf31    | <a href="#">NM_138811.3</a> |                                   |               |             |             |
| GI_38570067-S | 135.1  | 164.7  | 155.7  | C8orf2     | <a href="#">NM_007175.4</a> |                                   | molecular     | cellular_co | biological_ |
| GI_38570070-A | 95.8   | 115.2  | 99.8   | CLDN10     | <a href="#">NM_006984.3</a> | OSP-L;CPETRL3                     |               | tight       | cell        |
| GI_38570070-I | 86.5   | 93     | 103.8  | CLDN10     | <a href="#">NM_006984.3</a> | OSP-L;CPETRL3                     |               | tight       | cell        |
| GI_38570071-I | 82.7   | 81.8   | 75.1   | CLDN10     | <a href="#">NM_182848.2</a> | OSP-L;CPETRL3                     |               | tight       | cell        |
| GI_38570072-A | 98.5   | 106.3  | 98.6   | COL25A1    | <a href="#">NM_032518.2</a> |                                   | DNA           | microfibril | regulation  |
| GI_38570074-I | 116.8  | 114.9  | 107.6  | COL25A1    | <a href="#">NM_198721.1</a> |                                   | DNA           | microfibril | regulation  |
| GI_38570080-I | 85.7   | 95.9   | 82.1   | CUGBP1     | <a href="#">NM_198700.1</a> | CUGBP;NAB50;CUG-BP;hNab50;BRUNOL2 | RNA           | nucleus     | mRNA        |
| GI_38570082-A | 176.7  | 216.8  | 195.2  | CUGBP1     | <a href="#">NM_006560.2</a> | CUGBP;NAB50;CUG-BP;hNab50;BRUNOL2 | RNA           | nucleus     | mRNA        |
| GI_38570087-S | 326.8  | 363.7  | 282.6  | CDC40      | <a href="#">NM_015891.2</a> | EHB3;PRP17;PRPF17;FLJ10564        |               | spliceoso   | mRNA        |
| GI_38570088-S | 119.9  | 138.9  | 119.7  | CHC1L      | <a href="#">NM_001268.2</a> |                                   | Ran           |             | chromoso    |
| GI_38570089-S | 369.8  | 414.9  | 408.1  | CIAO1      | <a href="#">NM_004804.2</a> |                                   |               | nucleus     | positive    |
| GI_38570090-S | 1283   | 1985.6 | 1972.7 | CNP        | <a href="#">NM_033133.3</a> | CNP1                              | 2',3'-cyclic- | membran     | synaptic    |
| GI_38570092-S | 103.6  | 111.3  | 102    | FLJ20160   | <a href="#">NM_017694.2</a> |                                   |               |             |             |
| GI_38570094-S | 153.8  | 201.8  | 168.1  | FLJ20202   | <a href="#">NM_017709.2</a> |                                   |               |             |             |
| GI_38570096-S | 1311.9 | 1633.3 | 1559.3 | FLJ20259   | <a href="#">NM_017730.2</a> |                                   | DNA           | nucleus     | regulation  |

|               |        |        |        |           |                             |                                        |             |                         |
|---------------|--------|--------|--------|-----------|-----------------------------|----------------------------------------|-------------|-------------------------|
| GI_38570100-A | 118.5  | 153    | 127.2  | FLJ20298  | <a href="#">NM_017752.2</a> | transporte                             | membran     | transport               |
| GI_38570102-I | 84.1   | 110.7  | 101.6  | FLJ20298  | <a href="#">NM_198881.1</a> | transporte                             | membran     | transport               |
| GI_38570104-S | 132.5  | 135.1  | 100.7  | RAIN      | <a href="#">NM_017805.2</a> | FLJ20401                               |             |                         |
| GI_38570106-S | 171.2  | 196.6  | 193.5  | FLJ23588  | <a href="#">NM_022785.2</a> | DJBP;HSCBCIP1;KIAA1672;dJ185D5.1       | calcium     |                         |
| GI_38570110-S | 213.5  | 244.7  | 239.2  | FLJ25005  | <a href="#">NM_152334.2</a> |                                        | ATP         | threonyl-               |
| GI_38570112-S | 96.7   | 101.9  | 102.2  | RASGEF2   | <a href="#">NM_152643.3</a> | C10orf23;FLJ25027                      | guanyl-     | intracellula            |
| GI_38570114-S | 807.1  | 1065   | 941.2  | FLJ25476  | <a href="#">NM_152493.2</a> |                                        |             |                         |
| GI_38570116-S | 120.5  | 112.3  | 122.7  | ZNF569    | <a href="#">NM_152484.2</a> | FLJ32053                               |             | nucleus                 |
| GI_38570118-S | 214.5  | 308.3  | 296.4  | FLJ38451  | <a href="#">NM_175872.3</a> |                                        |             | nucleus                 |
| GI_38570120-S | 507    | 430.9  | 411.8  | FLJ10546  | <a href="#">NM_018133.2</a> |                                        |             |                         |
| GI_38570130-S | 101.1  | 94.7   | 92.6   | HIST1H2AG | <a href="#">NM_021064.3</a> | H2A/p;H2AFP;H2A.1b;pH2A/f              |             |                         |
| GI_38570131-S | 525.1  | 674.6  | 589.2  | HRB       | <a href="#">NM_004504.3</a> | RAB;RIP                                | RNA         | nuclear mRNA-           |
| GI_38570133-S | 396.5  | 421.6  | 309.2  | MAP4K5    | <a href="#">NM_006575.3</a> | KHS;GCKR;KHS1;MAPKKKK5                 | protein     | cytoplasm activation    |
| GI_38570136-S | 158.6  | 150.4  | 153.1  | MCOLN3    | <a href="#">NM_018298.9</a> | FLJ11006                               |             |                         |
| GI_38570137-S | 514.9  | 528    | 680.6  | MGC15677  | <a href="#">NM_032878.2</a> |                                        |             |                         |
| GI_38570141-S | 139.6  | 178.9  | 158.2  | MPP5      | <a href="#">NM_022474.2</a> | PALS1;FLJ12615                         | protein     | membran intracellula    |
| GI_38570143-S | 99.9   | 102.3  | 98.7   | SLC12A5   | <a href="#">NM_020708.3</a> | KCC2;KIAA1176                          | cation:chlo | integral to chloride    |
| GI_38570144-S | 103.1  | 97.6   | 101.5  | SPATS1    | <a href="#">NM_145026.2</a> | SRSP1;SPATA8;FLJ25442                  |             |                         |
| GI_38570145-S | 118.6  | 125.3  | 123.7  | SYT7      | <a href="#">NM_004200.2</a> | SYT-VII                                | calcium-    | synaptic exocytosis     |
| GI_38570147-A | 556.1  | 581.9  | 584    | KIAA1259  | <a href="#">NM_032196.3</a> | FLJ21124                               |             |                         |
| GI_38570148-S | 462    | 422    | 317.1  | KIAA1280  | <a href="#">NM_015691.2</a> | BM042                                  |             |                         |
| GI_38570150-I | 3878.8 | 3423.9 | 3310.4 | TAF9      | <a href="#">NM_003187.3</a> | TAF2G;CGI-                             | protein C-  | transcripti transcripti |
| GI_38570151-A | 2902.9 | 2789   | 2388.1 | TAF9      | <a href="#">NM_016283.3</a> | TAF2G;CGI-                             | protein C-  | transcripti transcripti |
| GI_38570151-I | 534    | 652.4  | 493.4  | TAF9      | <a href="#">NM_016283.3</a> | TAF2G;CGI-                             | protein C-  | transcripti transcripti |
| GI_38570152-S | 102.1  | 114.3  | 95.5   | TEAD1     | <a href="#">NM_021961.2</a> | TCF13;TEF-1                            | DNA         | nucleus regulation      |
| GI_38570153-S | 177.5  | 183.8  | 174    | JAZ       | <a href="#">NM_012279.2</a> |                                        | double-     | nucleolus cell growth   |
| GI_38570154-S | 90.2   | 102.7  | 99.9   | LRRRC4    | <a href="#">NM_022143.3</a> | NAG14;NGL-1                            |             |                         |
| GI_38570155-S | 695.2  | 801    | 730.9  | NT5C2L1   | <a href="#">NM_152729.2</a> | HT023;C6orf200;MGC24302;dJ486I3.1;dJ48 |             |                         |
| GI_38570157-S | 122.4  | 145.8  | 122.1  | OVOL1     | <a href="#">NM_004561.2</a> | HOVO1                                  | transcripti | nucleus regulation      |
| GI_38570159-S | 704.2  | 691    | 557.5  | XPO4      | <a href="#">NM_022459.3</a> | FLJ13046;KIAA1721                      | protein     | nucleus intracellula    |
| GI_38604072-S | 164.8  | 149.4  | 139.9  | FLJ13231  | <a href="#">NM_023073.2</a> | FLJ21126                               |             |                         |
| GI_38605731-A | 203.1  | 222    | 159.8  | NUP43     | <a href="#">NM_024647.4</a> | p42;FLJ13287;bA350J20.1                | protein     | nucleus intracellula    |
| GI_38605732-I | 196.8  | 227.9  | 208.8  | NUP43     | <a href="#">NM_198887.1</a> | p42;FLJ13287;bA350J20.1                | protein     | nucleus intracellula    |
| GI_38605734-S | 372.1  | 471.7  | 372.9  | FLJ10849  | <a href="#">NM_018243.2</a> |                                        |             |                         |
| GI_38638697-S | 2891.6 | 10037  | 8151.8 | KIAA1199  | <a href="#">NM_018689.1</a> | IR2155535                              |             |                         |
| GI_38678523-S | 117.4  | 123.2  | 118.8  | OPN5      | <a href="#">NM_181744.1</a> | PGR12;GPR136;TMEM13;dJ402H5.1          | receptor    | integral to G-protein   |
| GI_38678527-S | 181.9  | 226.7  | 201.2  | HFL-EDDG1 | <a href="#">NM_006553.2</a> |                                        |             |                         |
| GI_38678531-S | 92.1   | 114.5  | 92.1   | MGC39581  | <a href="#">NM_152784.2</a> |                                        |             |                         |
| GI_38678533-S | 146    | 173.4  | 164.9  | MGC27466  | <a href="#">NM_152373.2</a> |                                        | nucleic     | intracellula regulation |
| GI_38679883-I | 88.9   | 100.1  | 94.3   | SRI       | <a href="#">NM_198901.1</a> | SCN                                    | calcium     | cytoplasm regulation    |
| GI_38679885-S | 436.8  | 438.3  | 438.2  | SSB3      | <a href="#">NM_080861.3</a> |                                        |             |                         |
| GI_38679886-A | 4093.6 | 3932.1 | 3967.3 | SRI       | <a href="#">NM_003130.2</a> | SCN                                    | calcium     | cytoplasm regulation    |
| GI_38679887-I | 130.7  | 135.5  | 117.6  | RAB6A     | <a href="#">NM_198896.1</a> | RAB6                                   | RAB small   | Golgi nonselecti        |
| GI_38679889-S | 112.1  | 111.1  | 97.3   | SLCO4C1   | <a href="#">NM_180991.4</a> | OATPX;OATP-H;OATP-                     |             |                         |

|               |        |        |        |           |                             |                                 |            |              |              |
|---------------|--------|--------|--------|-----------|-----------------------------|---------------------------------|------------|--------------|--------------|
| GI_38679891-S | 144.3  | 174    | 165.3  | PIN4      | <a href="#">NM_006223.2</a> | EPVH;PAR14                      | peptidyl-  | mitochond    | protein      |
| GI_38679893-A | 431.8  | 508.2  | 455.5  | RAB6A     | <a href="#">NM_002869.4</a> | RAB6                            | RAB small  | Golgi        | nonselecti   |
| GI_38679894-S | 3753.9 | 4817.6 | 3509   | TXNDC7    | <a href="#">NM_005742.2</a> | P5                              | protein    | endoplas     | protein      |
| GI_38679895-S | 459.4  | 463.7  | 526.5  | PHIP      | <a href="#">NM_017934.4</a> | ndrp;WDR11;FLJ20705             |            |              |              |
| GI_38679896-S | 126.6  | 137.8  | 139.1  | BTBD14B   | <a href="#">NM_052876.2</a> | NAC1                            | protein    |              |              |
| GI_38679897-S | 105.5  | 113.5  | 106.2  | OR3A2     | <a href="#">NM_002551.2</a> | OR228;OLFRA04;OR17-228          | receptor   | integral to  | chemosen     |
| GI_38679899-S | 138.6  | 166.2  | 155.1  | LOC91056  | <a href="#">NM_138368.2</a> | DKFZp761E198                    |            |              |              |
| GI_38679901-S | 4082   | 3506.7 | 1536.3 | LOC93109  | <a href="#">NM_138399.2</a> |                                 |            |              |              |
| GI_38679903-S | 138.9  | 139.2  | 132.2  | ARL10B    | <a href="#">NM_138795.2</a> | FLJ45195                        | small      |              | small        |
| GI_38679904-S | 257.7  | 241.1  | 234.1  | LOC201292 | <a href="#">NM_173547.2</a> |                                 |            |              |              |
| GI_38679906-S | 1877   | 2173.5 | 3579.4 | LOC127262 | <a href="#">NM_182752.2</a> |                                 | transporte |              | transport    |
| GI_38679908-S | 625.4  | 578.9  | 485.6  | HT008     | <a href="#">NM_018469.3</a> | KIAA1738                        | sugar      |              | phosphoe     |
| GI_38679910-S | 1675.6 | 1782.9 | 1221.1 | HSPC132   | <a href="#">NM_016399.2</a> |                                 |            |              |              |
| GI_38679911-S | 125.7  | 136.3  | 162.1  | HSPC109   | <a href="#">NM_016390.2</a> | DKFZP566D143                    |            |              |              |
| GI_38679913-S | 231.8  | 220.5  | 179    | FLJ13089  | <a href="#">NM_024953.2</a> |                                 |            |              |              |
| GI_38679925-S | 441.2  | 595.1  | 420.3  | CEECAM1   | <a href="#">NM_016174.3</a> | CerCAM                          | cell       | integral to  | leukocyte    |
| GI_38679945-S | 209.5  | 213.7  | 184.6  | ABAT      | <a href="#">NM_020686.3</a> | GABAT;NPD009;GABA-AT            | 4-         | mitochond    | amino        |
| GI_38679949-S | 100.2  | 112.2  | 90.7   | ABAT      | <a href="#">NM_000663.2</a> | GABAT;NPD009;GABA-AT            | 4-         | mitochond    | amino        |
| GI_38679953-A | 2831.9 | 2594.4 | 2500.7 | ABR       | <a href="#">NM_001092.3</a> | MDB                             | GTPase     |              | small        |
| GI_38679953-I | 121    | 109.1  | 107.1  | ABR       | <a href="#">NM_001092.3</a> | MDB                             | GTPase     |              | small        |
| GI_38679956-I | 109    | 100.9  | 112.5  | ABR       | <a href="#">NM_021962.2</a> | MDB                             | GTPase     |              | small        |
| GI_38679976-I | 85.5   | 80.9   | 83.5   | ACACA     | <a href="#">NM_198839.1</a> | ACC;ACAC;ACC1;ACCA              | acetyl-    | biotin       | biotin       |
| GI_38679979-A | 1431.6 | 1510.9 | 820.3  | ACACA     | <a href="#">NM_000664.3</a> | ACC;ACAC;ACC1;ACCA              | acetyl-    | biotin       | biotin       |
| GI_38683796-S | 566    | 654.8  | 646.2  | ANKS1     | <a href="#">NM_015245.1</a> | KIAA0229                        | DNA        | nucleus      | regulation   |
| GI_38683798-S | 796.6  | 780.9  | 679.5  | ANKRD13   | <a href="#">NM_033121.1</a> | NY-REN-25                       |            |              |              |
| GI_38683806-S | 356.4  | 432.1  | 329.9  | ANKRD17   | <a href="#">NM_032217.3</a> | GTAR;FLJ22206;KIAA0697;NY-BR-16 |            |              |              |
| GI_38683837-S | 2036.2 | 1716.5 | 1447.7 | CD47      | <a href="#">NM_001777.2</a> | IAP;OA3;MER6                    | plasma     | proteoglyc   | integrin-    |
| GI_38683838-S | 94     | 102.7  | 99     | CD96      | <a href="#">NM_005816.3</a> | TACTILE;MGC22596                | defense/i  | integral to  | cell         |
| GI_38683841-S | 978.6  | 1136.9 | 991.9  | CDC26     | <a href="#">NM_139286.3</a> | C9orf17                         |            |              |              |
| GI_38683842-S | 2436.5 | 1944.1 | 1711.6 | C6orf108  | <a href="#">NM_006443.2</a> | RCL;dJ330M21.3                  |            | nucleus      | cell         |
| GI_38683843-I | 104.2  | 105.2  | 94.8   | CNR1      | <a href="#">NM_016083.3</a> | CB1;CNR;CB-R;CB1A;CANN6;CB1K5   | cannabino  | integral to  | G-protein    |
| GI_38683845-S | 543.1  | 416.2  | 502.8  | CPNE8     | <a href="#">NM_153634.2</a> |                                 |            |              |              |
| GI_38683846-S | 134.6  | 160    | 146.7  | FGF11     | <a href="#">NM_004112.2</a> | FHF3;MGC45269                   | growth     | extracellul  | signal       |
| GI_38683847-S | 1348.2 | 1707   | 1733.1 | FIBP      | <a href="#">NM_004214.4</a> | FGFIBP;FIBP-1                   | protein    | membran      | FGF          |
| GI_38683850-S | 126.6  | 163.8  | 133.8  | FLJ11220  | <a href="#">NM_018364.2</a> |                                 |            |              |              |
| GI_38683852-S | 177.1  | 223    | 217.1  | FLJ13946  | <a href="#">NM_152275.2</a> |                                 |            |              |              |
| GI_38683854-S | 1022.9 | 925.6  | 962.1  | FLJ20758  | <a href="#">NM_017952.4</a> |                                 |            |              |              |
| GI_38683856-S | 109    | 108.4  | 103.2  | ICEBERG   | <a href="#">NM_021571.2</a> |                                 | cysteine   | intracellula | apoptosis    |
| GI_38683857-I | 111.1  | 123.4  | 107.3  | IRF5      | <a href="#">NM_002200.3</a> |                                 | RNA        | nucleus      | cell growth  |
| GI_38683858-A | 156    | 161.2  | 151.8  | IRF5      | <a href="#">NM_032643.3</a> |                                 | RNA        | nucleus      | cell growth  |
| GI_38683859-S | 109    | 111.6  | 103.2  | IRS2      | <a href="#">NM_003749.2</a> |                                 | signal     |              | positive     |
| GI_38683861-S | 287.7  | 381.9  | 307.4  | RAC3      | <a href="#">NM_005052.2</a> |                                 | GTPase     |              | intracellula |
| GI_38683862-I | 80.7   | 79.1   | 72.8   | RBBP6     | <a href="#">NM_006910.4</a> | MY038;RBQ-1;DKFZp761B2423       | protein    |              | regulation   |
| GI_38683864-A | 237.4  | 239.1  | 204.3  | RBBP6     | <a href="#">NM_032626.5</a> | MY038;RBQ-1;DKFZp761B2423       | protein    |              | regulation   |

|               |         |        |        |           |                             |                                        |            |             |              |
|---------------|---------|--------|--------|-----------|-----------------------------|----------------------------------------|------------|-------------|--------------|
| GI_38683864-I | 111.9   | 130.5  | 119.7  | RBBP6     | <a href="#">NM_032626.5</a> | MY038;RBQ-1;DKFZp761B2423              | protein    |             | regulation   |
| GI_38683865-S | 2905.8  | 1675.2 | 1296.3 | RNASSET2  | <a href="#">NM_003730.3</a> | FLJ10907;RNASE6PL;ba514O12.3           | ribonuclea | extracellul | RNA          |
| GI_38683866-S | 21109.7 | 18453  | 15348  | RPL36A    | <a href="#">NM_021029.3</a> | L44L;RPL44                             |            |             |              |
| GI_38683867-A | 133.5   | 149.9  | 171.4  | APG16L    | <a href="#">NM_017974.2</a> | WDR30;FLJ00045;FLJ10035;FLJ10828;FLJ2  |            |             |              |
| GI_38707980-S | 183.8   | 227.8  | 184.7  | CAPN12    | <a href="#">NM_144691.2</a> | MGC20576                               |            |             |              |
| GI_38708010-S | 120.7   | 141.4  | 103.7  | MGC45477  | <a href="#">NM_198924.1</a> |                                        |            |             |              |
| GI_38708168-S | 502     | 478.3  | 388.5  | SNX25     | <a href="#">NM_031953.2</a> | SBBI31;MSTP043;FLJ23161                |            |             |              |
| GI_38708298-S | 93.6    | 98.6   | 95.9   | SLC29A2   | <a href="#">NM_001532.2</a> | ENT2;DER12;HNP36                       | nucleoside | nucleolus   | nucleoside   |
| GI_38708308-S | 198.4   | 211.4  | 208    | PNAS-4    | <a href="#">NM_016076.2</a> | CGI-146                                |            |             |              |
| GI_38708312-A | 394.2   | 532.1  | 577.2  | LOC253982 | <a href="#">NM_181718.3</a> |                                        |            |             |              |
| GI_38708316-I | 141.5   | 169    | 144.8  | LOC253982 | <a href="#">NM_198907.1</a> |                                        |            |             |              |
| GI_38708320-I | 204.8   | 163.6  | 196.6  | KIAA1259  | <a href="#">NM_017553.1</a> | FLJ21124                               |            |             |              |
| GI_38708325-S | 1003.5  | 712.1  | 505.6  | CSNK2A2   | <a href="#">NM_001896.2</a> | CK2A2;CSNK2A1                          | protein    |             | spermatid    |
| GI_38787903-A | 236.2   | 283.3  | 258.3  | BMP2K     | <a href="#">NM_017593.3</a> | BIKE;HRIHFB2017;DKFZp434K0614;DKFZp    | cAMP-      | nucleus     | protein      |
| GI_38787934-I | 121.5   | 113.1  | 120.3  | BMP2K     | <a href="#">NM_198892.1</a> | BIKE;HRIHFB2017;DKFZp434K0614;DKFZp    | cAMP-      | nucleus     | protein      |
| GI_38787940-I | 113     | 113.3  | 107    | TENC1     | <a href="#">NM_015319.2</a> | C1TEN;C1-TEN;KIAA1075                  |            |             | intracellula |
| GI_38787956-A | 200.1   | 179.5  | 145.7  | TENC1     | <a href="#">NM_170754.2</a> | C1TEN;C1-TEN;KIAA1075                  |            |             | intracellula |
| GI_38787956-I | 98.8    | 112    | 97     | TENC1     | <a href="#">NM_170754.2</a> | C1TEN;C1-TEN;KIAA1075                  |            |             | intracellula |
| GI_38787975-S | 2253.4  | 2294.1 | 2279.7 | TM4SF8    | <a href="#">NM_005724.4</a> | TM4-A;TSPAN-3                          | cell       | integral to | mystery      |
| GI_38787996-I | 162.2   | 193.5  | 180.2  | TREX1     | <a href="#">NM_033627.3</a> | DRN3;ATRIP;FLJ12343;DKFZp434J0310      | 3'-5'      |             | DNA          |
| GI_38788009-S | 780.7   | 815.9  | 779.1  | SART1     | <a href="#">NM_005146.3</a> | Ara1;HOMS1;MGC2038;SART1259            | tumor      | cytosol     |              |
| GI_38788093-I | 107.2   | 108.7  | 103.7  | 3-Sep     | <a href="#">NM_019106.4</a> | SEP3;bK250D10.3                        |            |             |              |
| GI_38788107-S | 2812    | 2656.1 | 2453.6 | SGTA      | <a href="#">NM_003021.3</a> | SGT                                    | protein    | cellular_co | biological_  |
| GI_38788121-S | 8407.7  | 7624.6 | 6773.9 | SPUVE     | <a href="#">NM_007173.3</a> | ZSIG13;MGC5107;PRSS23-PENDING          | trypsin    |             | proteolysis  |
| GI_38788134-A | 229.8   | 274.1  | 244.7  | GABRG2    | <a href="#">NM_000816.2</a> | CAE2;ECA2;GEFSP3                       | benzodiaz  | integral to | gamma-       |
| GI_38788154-I | 90.9    | 98.7   | 100.5  | GABRG2    | <a href="#">NM_198904.1</a> | CAE2;ECA2;GEFSP3                       | benzodiaz  | integral to | gamma-       |
| GI_38788159-I | 167.7   | 186    | 173.1  | GALNT10   | <a href="#">NM_198321.2</a> | FLJ00205;FLJ11715;GalNAcT10;DKFZp586   |            |             |              |
| GI_38788170-A | 313.4   | 370.1  | 406.5  | GALNT10   | <a href="#">NM_017540.3</a> | FLJ00205;FLJ11715;GalNAcT10;DKFZp586   |            |             |              |
| GI_38788170-I | 114.7   | 142    | 119.8  | GALNT10   | <a href="#">NM_017540.3</a> | FLJ00205;FLJ11715;GalNAcT10;DKFZp586   |            |             |              |
| GI_38788179-S | 124.5   | 132.8  | 112.9  | EAF1      | <a href="#">NM_033083.5</a> |                                        |            |             |              |
| GI_38788192-S | 109     | 123.7  | 108.8  | EDG3      | <a href="#">NM_005226.2</a> | LPB3;S1P3;EDG-3;FLJ37523;MGC71696      | lipid      | integral to | cytosolic    |
| GI_38788218-S | 1290.5  | 2112.5 | 1087.8 | MGC51082  | <a href="#">NM_182498.2</a> |                                        | DNA        | nucleus     | regulation   |
| GI_38788229-S | 1293.8  | 1338.3 | 1401.2 | MRPL48    | <a href="#">NM_016055.3</a> | CGI-118;MGC13323                       | structural | ribosome    | protein      |
| GI_38788259-A | 173.4   | 200    | 163.3  | FALZ      | <a href="#">NM_004459.5</a> | BPTF;FAC1;NURF301                      |            | cytoplasm   | neurogene    |
| GI_38788259-I | 176.4   | 185.7  | 180.7  | FALZ      | <a href="#">NM_004459.5</a> | BPTF;FAC1;NURF301                      |            | cytoplasm   | neurogene    |
| GI_38788273-I | 250.8   | 321.1  | 296.1  | FALZ      | <a href="#">NM_182641.2</a> | BPTF;FAC1;NURF301                      |            | cytoplasm   | neurogene    |
| GI_38788287-S | 194.8   | 228.9  | 240.6  | ZNF160    | <a href="#">NM_033288.2</a> | F11;HZF5;KR18;:KR18;HKr18;FLJ00032;KIA | DNA        | nucleus     | regulation   |
| GI_38788301-I | 118.2   | 119.2  | 127.2  | ZNF160    | <a href="#">NM_198893.1</a> | F11;HZF5;KR18;:KR18;HKr18;FLJ00032;KIA | DNA        | nucleus     | regulation   |
| GI_38788307-S | 961.4   | 924    | 1021.1 | GNE       | <a href="#">NM_005476.3</a> | NM;DMRV;IBM2;Uae1;GLCNE                | UDP-N-     | cytoplasm   | N-           |
| GI_38788318-S | 169.1   | 172    | 167.9  | GNL1      | <a href="#">NM_005275.2</a> | HSR1                                   | GTP        |             | signal       |
| GI_38788332-S | 294.8   | 362.8  | 351.6  | HBXAP     | <a href="#">NM_016578.3</a> | RSF1;XAP8;p325                         | DNA        |             | regulation   |
| GI_38788352-S | 3835    | 4577.7 | 4546.2 | HBXIP     | <a href="#">NM_006402.2</a> | XIP                                    | antiviral  |             | viral        |
| GI_38788371-S | 1339.7  | 1412.6 | 1308.7 | AQR       | <a href="#">NM_014691.1</a> | KIAA0560                               |            |             |              |
| GI_38788379-S | 186.2   | 196.5  | 215.7  | DHTKD1    | <a href="#">NM_018706.4</a> | MGC3090;KIAA1630;DKFZP762M115          | oxidoredu  |             | metabolis    |

|               |        |        |        |            |                             |                                    |             |             |              |
|---------------|--------|--------|--------|------------|-----------------------------|------------------------------------|-------------|-------------|--------------|
| GI_38788404-S | 268.6  | 362.2  | 292.1  | HD         | <a href="#">NM_002111.4</a> | IT15                               | microtubul  | soluble     | induction    |
| GI_38788415-S | 429.9  | 178.7  | 237.8  | LAMA1      | <a href="#">NM_005559.2</a> | LAMA                               | extracellul | basal       | cell-matrix  |
| GI_38788425-S | 256.4  | 239.3  | 244.4  | NOG        | <a href="#">NM_005450.2</a> | SYM1;SYNS1                         |             | extracellul | skeletal     |
| GI_38788444-S | 146    | 167.4  | 139.7  | OTC        | <a href="#">NM_000531.3</a> | OCTD                               | ornithine   | ornithine   | 'de novo'    |
| GI_38788468-S | 124.4  | 152.5  | 130    | PCDH18     | <a href="#">NM_019035.2</a> | PCDH68L;KIAA1562;DKFZP434B0923     | carboxype   | membran     | homophili    |
| GI_38788480-S | 402.9  | 487.8  | 386.7  | PROSC      | <a href="#">NM_007198.2</a> |                                    | molecular   | cytoplasm   | biological_  |
| GI_38888174-S | 118.7  | 117.9  | 110.3  | SFTPA1     | <a href="#">NM_005411.3</a> | PSAP;PSPA;SP-A;SFTP1;SP-A1;COLEC4  | apolipopro  | extracellul |              |
| GI_39204546-S | 291.7  | 364.2  | 308.1  | TSARG6     | <a href="#">NM_153614.2</a> | TSARG5;FLJ46748                    |             |             |              |
| GI_39540511-S | 420.7  | 561.2  | 478.5  | DNAJC14    | <a href="#">NM_032364.4</a> | DNAJ;HDJ3;LIP6;DRIP78              | chaperone   |             | protein      |
| GI_39545574-I | 94.1   | 90.4   | 93.7   | LOC55924   | <a href="#">NM_198926.1</a> |                                    | DNA         | nucleus     | regulation   |
| GI_39545576-S | 810    | 856.8  | 809.6  | LOC51320   | <a href="#">NM_016626.2</a> |                                    |             |             |              |
| GI_39545578-A | 121.4  | 124.4  | 127.6  | LOC55924   | <a href="#">NM_019099.3</a> |                                    | DNA         | nucleus     | regulation   |
| GI_39545579-S | 772.7  | 619    | 702.8  | LOC51185   | <a href="#">NM_016302.2</a> |                                    | ATP-        |             | ATP-         |
| GI_39573706-S | 220.8  | 233.6  | 211.4  | DKFZp434K1 | <a href="#">NM_182905.1</a> |                                    |             |             |              |
| GI_39573712-S | 101    | 112.2  | 113    | ALS2CR17   | <a href="#">NM_198945.1</a> |                                    |             |             |              |
| GI_39573715-S | 121.4  | 132.5  | 114.1  | LCN6       | <a href="#">NM_198946.1</a> | UNQ643                             |             |             |              |
| GI_39573717-S | 116    | 150.7  | 156.7  | CANP       | <a href="#">NM_198947.1</a> |                                    |             |             |              |
| GI_39573729-S | 834.4  | 914.3  | 660.9  | MGC52000   | <a href="#">NM_198943.1</a> |                                    |             |             |              |
| GI_39652617-S | 497.9  | 464.8  | 461.4  | TTC4       | <a href="#">NM_004623.2</a> | MGC5097                            | tumor       |             | oncogene     |
| GI_39652623-S | 193.3  | 223.5  | 240.2  | ESPL1      | <a href="#">NM_012291.3</a> | ESP1;SEPARIN;KIAA0165              | protein     | centrosom   | mitotic      |
| GI_39653312-S | 92.5   | 85.6   | 89.3   | FLJ46154   | <a href="#">NM_198462.1</a> | KIAA1493                           |             |             | intracellula |
| GI_39653314-S | 135.5  | 138.1  | 193.8  | DUFD1      | <a href="#">NM_138419.2</a> |                                    |             |             |              |
| GI_39653316-S | 157.9  | 171.4  | 155.9  | JMJD2D     | <a href="#">NM_018039.2</a> |                                    | DNA         | nucleus     | regulation   |
| GI_39653318-S | 94.9   | 81.9   | 91.5   | DKFZp434B0 | <a href="#">NM_013377.2</a> | PDZRN4                             |             |             |              |
| GI_39653320-I | 79.8   | 82.6   | 76.9   | CGI-72     | <a href="#">NM_024878.1</a> | FLJ13649;FLJ21615;MGC64923         |             |             |              |
| GI_39653322-I | 147.9  | 179.4  | 158.7  | CGI-72     | <a href="#">NM_032205.2</a> | FLJ13649;FLJ21615;MGC64923         |             |             |              |
| GI_39725631-I | 3688.1 | 4985.1 | 2084.3 | TPM3       | <a href="#">NM_153649.2</a> | TRK;NEM1                           |             |             |              |
| GI_39725632-S | 1641.4 | 1400.8 | 1000.4 | KIAA0116   | <a href="#">NM_015004.2</a> | RRP42                              | exonuclea   | nucleus     | rRNA         |
| GI_39725633-S | 975.9  | 1123.8 | 1053.1 | LARP       | <a href="#">NM_015315.2</a> | KIAA0731;MGC19556                  |             |             | electron     |
| GI_39725635-S | 1840   | 2766.3 | 2425.4 | HSGP25L2G  | <a href="#">NM_017510.3</a> |                                    | protein     | endoplas    | intracellula |
| GI_39725639-I | 693.3  | 602.9  | 534.3  | FLJ20542   | <a href="#">NM_017871.3</a> | FLJ13294                           |             |             |              |
| GI_39725640-S | 1009.8 | 972.6  | 915.6  | C6orf166   | <a href="#">NM_018064.2</a> | FLJ10342;dJ486L4.2                 |             |             |              |
| GI_39725642-S | 579.6  | 587    | 606.7  | SELB       | <a href="#">NM_021937.2</a> | EFSEC;EEFSEC                       | GTP         | cytoplasm   | translation  |
| GI_39725643-A | 343.8  | 688.6  | 284.6  | MR-1       | <a href="#">NM_022572.2</a> | BRP17;FKSG19;TAHCCP2;KIAA1184;MGC3 |             |             |              |
| GI_39725643-I | 148    | 168.6  | 146.8  | MR-1       | <a href="#">NM_022572.2</a> | BRP17;FKSG19;TAHCCP2;KIAA1184;MGC3 |             |             |              |
| GI_39725645-I | 119.1  | 123.7  | 117.3  | STAG3      | <a href="#">NM_024070.2</a> | MGC2463                            |             | synaptone   | synaptone    |
| GI_39725646-S | 1914.4 | 1691   | 1652.3 | ALG8       | <a href="#">NM_024079.2</a> | MGC2840                            | transferas  | endoplas    |              |
| GI_39725648-S | 589.4  | 727.4  | 755.5  | MGC4606    | <a href="#">NM_024516.2</a> |                                    |             |             |              |
| GI_39725649-S | 1419.5 | 1343.1 | 1434.3 | MGC2408    | <a href="#">NM_032331.2</a> |                                    | S-          |             |              |
| GI_39725650-S | 681.3  | 509.4  | 585.7  | MGC4238    | <a href="#">NM_032332.2</a> |                                    |             |             |              |
| GI_39725651-S | 89.1   | 107.4  | 104.7  | MGC3047    | <a href="#">NM_032348.2</a> |                                    |             |             |              |
| GI_39725652-S | 321.6  | 458.7  | 571.6  | SDOS       | <a href="#">NM_032349.2</a> | MGC11275                           |             |             |              |
| GI_39725653-S | 109.9  | 132.6  | 121.3  | MGC2562    | <a href="#">NM_032374.2</a> |                                    |             |             |              |
| GI_39725654-S | 1732.4 | 1845.6 | 1883.2 | AKT1S1     | <a href="#">NM_032375.2</a> | Lobe;PRAS40;MGC2865                |             |             |              |

|               |        |        |        |             |                             |                                     |             |                         |
|---------------|--------|--------|--------|-------------|-----------------------------|-------------------------------------|-------------|-------------------------|
| GI_39725655-S | 1381.8 | 1268.5 | 1245.1 | MGC4251     | <a href="#">NM_032376.2</a> |                                     |             |                         |
| GI_39725656-S | 1040.9 | 1198   | 1097.6 | MGC4549     | <a href="#">NM_032377.2</a> |                                     |             |                         |
| GI_39725657-S | 882.3  | 715.3  | 705.7  | MGC13125    | <a href="#">NM_032725.2</a> |                                     |             |                         |
| GI_39725658-S | 169.5  | 212.1  | 198.5  | INA         | <a href="#">NM_032727.2</a> | NEF5;NF-66;TXBP-1;MGC12702          | structural  | neurofilam              |
| GI_39725659-S | 513.5  | 621    | 566.7  | MGC4126     | <a href="#">NM_032773.2</a> |                                     |             |                         |
| GI_39725660-S | 203.1  | 217.4  | 168.5  | MGC13159    | <a href="#">NM_032927.2</a> |                                     |             |                         |
| GI_39725661-S | 1014   | 1028.9 | 779.5  | MGC14141    | <a href="#">NM_032928.2</a> |                                     |             |                         |
| GI_39725662-S | 675.4  | 663.2  | 303.3  | C6orf11     | <a href="#">NM_005452.4</a> | BING4                               | molecular   | cellular_co biological_ |
| GI_39725663-S | 733.6  | 845.9  | 968.2  | T54         | <a href="#">NM_015698.3</a> |                                     |             |                         |
| GI_39725664-S | 92.3   | 104.1  | 98     | MGC14289    | <a href="#">NM_080660.2</a> |                                     |             |                         |
| GI_39725665-S | 106.8  | 114.7  | 108.6  | PEX11G      | <a href="#">NM_080662.2</a> | MGC4281                             |             |                         |
| GI_39725666-S | 425.9  | 548.5  | 430.5  | SLC35A4     | <a href="#">NM_080670.2</a> | MGC2541                             |             |                         |
| GI_39725667-S | 407.2  | 836.5  | 450    | HTR1D       | <a href="#">NM_000864.3</a> | HTRL;RDC4;HT1DA;HTR1DA              | serotonin   | integral to G-protein   |
| GI_39725669-S | 150.3  | 174.3  | 167.2  | MPZ         | <a href="#">NM_000530.3</a> | P0;CHM;DSS;MPP;CMT1B;CMT2I;CMT2J;C  | structural  | integral to homophili   |
| GI_39725670-S | 320    | 353.2  | 334.2  | AP3S2       | <a href="#">NM_005829.3</a> | AP3S3;sigma3b;FLJ35955              | protein     | Golgi intracellula      |
| GI_39725671-S | 600.9  | 572.4  | 730.1  | SCLY        | <a href="#">NM_016510.3</a> | SCL                                 | selenocyst  | cytosol amino           |
| GI_39725672-S | 5389.1 | 4369.6 | 6526   | CLCN7       | <a href="#">NM_001287.3</a> | CLC7;CLC-7;OPTA2                    | chloride    | membran small           |
| GI_39725673-S | 699.3  | 587.3  | 652.8  | VEGFB       | <a href="#">NM_003377.3</a> | VRF;VEGFL                           | vascular    | membran positive        |
| GI_39725674-S | 750.3  | 801.7  | 842.1  | NMT1        | <a href="#">NM_021079.3</a> | NMT                                 | catalytic   | protein-                |
| GI_39725675-S | 987.1  | 1459.2 | 1905.6 | DOC-1R      | <a href="#">NM_005851.3</a> |                                     | tumor       |                         |
| GI_39725676-S | 286    | 378    | 302.5  | NUCB1       | <a href="#">NM_006184.3</a> | NUC                                 | DNA         | Golgi                   |
| GI_39725677-S | 529.8  | 636.8  | 543.1  | SNAPAP      | <a href="#">NM_012437.3</a> | SNAPIN                              | SNARE       | secretory intracellula  |
| GI_39725678-S | 820.9  | 657.1  | 874.5  | BM039       | <a href="#">NM_018455.3</a> |                                     |             |                         |
| GI_39725679-S | 2013.8 | 2586.3 | 2247.4 | TOMM22      | <a href="#">NM_020243.3</a> | TOM22                               | receptor    | mitochond mitochond     |
| GI_39725680-S | 193    | 234.1  | 223.9  | CLDN6       | <a href="#">NM_021195.3</a> |                                     | structural  | tight                   |
| GI_39725681-S | 115.2  | 106.2  | 97.1   | STRAIT11499 | <a href="#">NM_021242.3</a> | FLJ10386                            |             |                         |
| GI_39725682-S | 566.5  | 492.4  | 457.4  | FLJ23441    | <a href="#">NM_024678.3</a> |                                     | aspartate-  | intracellula aspartyl-  |
| GI_39725684-S | 238.3  | 236.5  | 234.6  | FLJ12528    | <a href="#">NM_025150.3</a> |                                     |             |                         |
| GI_39725686-S | 140.2  | 158.2  | 131    | LDB1        | <a href="#">NM_003893.3</a> | NLI;CLIM2                           | transcripti | nucleus developm        |
| GI_39725687-S | 2224.2 | 2517.8 | 2220.3 | NDUFA9      | <a href="#">NM_005002.3</a> | NDUFS2L                             | NADH        | mitochond sodium        |
| GI_39725688-S | 5573.4 | 5979   | 5894.7 | TUBB2       | <a href="#">NM_006088.3</a> |                                     | structural  | cytoskelet microtubul   |
| GI_39725690-S | 817.2  | 714.7  | 719.9  | SPUF        | <a href="#">NM_013349.3</a> |                                     |             | electron                |
| GI_39725691-S | 97.2   | 104.2  | 106.2  | GTSE1       | <a href="#">NM_016426.3</a> | B99;GTSE-1                          | molecular   | cytoplasm G2 phase      |
| GI_39725692-S | 1211.9 | 1393.6 | 1127.9 | FLJ10420    | <a href="#">NM_018090.3</a> |                                     |             |                         |
| GI_39725693-S | 569.4  | 649.4  | 722.3  | BIN3        | <a href="#">NM_018688.3</a> |                                     |             | kinesin endocytosi      |
| GI_39725694-S | 377.6  | 368.7  | 361.9  | CRIP1       | <a href="#">NM_001311.3</a> | CRHP;CRIP;CRP1                      | zinc ion    | cytoplasm cell          |
| GI_39725695-S | 484.6  | 530.2  | 623.5  | L3MBTL2     | <a href="#">NM_031488.3</a> | dJ756G23.3;H-I(3)mbt-l;DKFZP7611141 | transcripti | nucleus regulation      |
| GI_39725696-S | 229.8  | 238.9  | 221.8  | SCGB1A1     | <a href="#">NM_003357.3</a> | UGB;CC10;CC16;CCSP                  | cytokine    | embryo                  |
| GI_39725697-S | 100    | 116.3  | 110.7  | LOC51063    | <a href="#">NM_015916.3</a> |                                     |             |                         |
| GI_39725699-S | 2871.2 | 3153.4 | 2856.5 | RRP4        | <a href="#">NM_014285.4</a> |                                     | 7S RNA      | exosome rRNA            |
| GI_39725700-S | 1472.2 | 2033.3 | 1548.4 | HIP-55      | <a href="#">NM_014063.4</a> | SH3P7                               | enzyme      | intracellula activation |
| GI_39725701-S | 109.5  | 107    | 104.4  | FLJ32416    | <a href="#">NM_144616.2</a> | JP-45                               | DNA         | nucleus regulation      |
| GI_39725704-S | 815.7  | 969.2  | 1004.6 | FLJ13479    | <a href="#">NM_024706.3</a> |                                     |             | nucleus                 |
| GI_39725705-S | 4652.7 | 3621.4 | 3841.4 | TNFSF5IP1   | <a href="#">NM_020232.3</a> | HCCA3;CLAST3;MDS003;HsT1707;MGC150  |             |                         |

|               |        |        |        |            |                             |                              |            |                       |
|---------------|--------|--------|--------|------------|-----------------------------|------------------------------|------------|-----------------------|
| GI_39725706-S | 1359.1 | 1414.5 | 1173.9 | BMI1       | <a href="#">NM_005180.5</a> | RNF51;MGC12685               | nucleus    | segment               |
| GI_39725709-S | 155.5  | 195.7  | 166.3  | LOC90925   | <a href="#">NM_175870.3</a> |                              |            |                       |
| GI_39725710-S | 92.2   | 94.2   | 86.3   | MGC4701    | <a href="#">NM_024511.3</a> | IT1                          |            |                       |
| GI_39725712-S | 905.1  | 958.3  | 832    | PFKM       | <a href="#">NM_000289.3</a> | MGC8699                      | phosphofr  | 6- regulation         |
| GI_39725713-S | 2204.5 | 1863.4 | 2129.9 | ALG3       | <a href="#">NM_005787.3</a> | CDGS4;Not56;NOT56L;D16Ert36e | transferas | endoplas protein      |
| GI_39725714-S | 5430.7 | 4690.1 | 4344.6 | ATIC       | <a href="#">NM_004044.4</a> | PURH;AICARFT;IMPCHASE        | phosphori  | nucleobas             |
| GI_39725715-S | 938.7  | 1114   | 759.6  | SNRPA      | <a href="#">NM_004596.3</a> |                              | small      | snRNP U1              |
| GI_39725933-S | 136.2  | 133.7  | 93.2   | SERPINF1   | <a href="#">NM_002615.3</a> | PEDF;EPC-1                   | serpin     | histogene             |
| GI_39725935-S | 328    | 332    | 304.6  | STX18      | <a href="#">NM_016930.2</a> |                              | protein    | kinesin nonselecti    |
| GI_39725936-S | 100.6  | 90.4   | 90.7   | PGM5       | <a href="#">NM_021965.2</a> | PGMRP                        | structural | cell-cell cell shape  |
| GI_39725937-S | 157.8  | 162.1  | 151.6  | RPC155     | <a href="#">NM_007055.2</a> | RPC1                         | DNA-       | nucleus transcripti   |
| GI_39725939-S | 113.6  | 140    | 125.5  | OPRK1      | <a href="#">NM_000912.2</a> | KOR;OPRK                     | kappa-     | integral to G-protein |
| GI_39725941-S | 1536.6 | 1170.9 | 938.6  | PEO1       | <a href="#">NM_021830.3</a> | PEO;TWINL;C10orf2;FLJ21832   | helicase   |                       |
| GI_39725945-S | 163.4  | 194.4  | 136.1  | NINJ2      | <a href="#">NM_016533.4</a> |                              | cell       | integral to neuronal  |
| GI_39725947-S | 422.3  | 444.8  | 429.6  | MIZF       | <a href="#">NM_015517.3</a> | HiNF-P;DKFZP434F162          |            |                       |
| GI_39725949-S | 446.7  | 437.5  | 437.3  | IPO11      | <a href="#">NM_016338.3</a> | RanBP11                      | protein    | nuclear protein-      |
| GI_39725951-S | 285    | 335    | 316.1  | HSU84971   | <a href="#">NM_018046.2</a> | VG5Q;FLJ10283;HUS84971       | nucleic    | intracellula          |
| GI_39725953-S | 199    | 183.4  | 181.2  | FLJ11149   | <a href="#">NM_018339.3</a> | RFK                          | riboflavin | vitamin B2            |
| GI_39725954-S | 209.9  | 247.2  | 210    | FLJ21613   | <a href="#">NM_024635.2</a> | FLJ22643                     |            |                       |
| GI_39725956-I | 122.4  | 132.3  | 96.9   | DZIP1      | <a href="#">NM_198968.1</a> | DZIP;KIAA0996                |            |                       |
| GI_39725958-A | 391.1  | 417    | 339.7  | DZIP1      | <a href="#">NM_014934.2</a> | DZIP;KIAA0996                |            |                       |
| GI_39725959-S | 104.6  | 113.8  | 105    | DKFZp451J0 | <a href="#">NM_175852.3</a> |                              |            |                       |
| GI_39752638-S | 535.2  | 643.1  | 658.9  | FLJ22374   | <a href="#">NM_032222.1</a> |                              |            |                       |
| GI_39752644-S | 2655.8 | 2506.7 | 2761.9 | FLJ10326   | <a href="#">NM_018060.2</a> |                              | ATP        | isoleucyl-            |
| GI_39752662-S | 111.5  | 126.3  | 116.4  | LENG9      | <a href="#">NM_198988.1</a> |                              |            |                       |
| GI_39752666-S | 94.4   | 99.9   | 98.9   | DLEU7      | <a href="#">NM_198989.1</a> |                              |            |                       |
| GI_39752670-S | 149.9  | 145.1  | 136.5  | SYT10      | <a href="#">NM_198992.1</a> |                              |            |                       |
| GI_39752672-S | 294.1  | 361.5  | 312.5  | 24b2/STAC2 | <a href="#">NM_198993.1</a> |                              |            |                       |
| GI_39752674-S | 137.7  | 158.2  | 133.1  | TGM6       | <a href="#">NM_198994.1</a> |                              |            |                       |
| GI_39752676-S | 105.6  | 106.1  | 117.3  | LOC374864  | <a href="#">NM_198995.1</a> |                              |            |                       |
| GI_39752678-S | 101.5  | 95.3   | 89.4   | LOC375108  | <a href="#">NM_198996.1</a> |                              |            |                       |
| GI_39752682-A | 84.8   | 99.5   | 90.5   | PRES       | <a href="#">NM_198999.1</a> | SLC26A5                      | motor      | membran sulfate       |
| GI_39752684-S | 82.1   | 79     | 78.6   | LHFPL3     | <a href="#">NM_199000.1</a> |                              |            |                       |
| GI_39752686-S | 182    | 208.1  | 209.5  | MGC59937   | <a href="#">NM_199001.1</a> |                              |            |                       |
| GI_39753951-S | 2788.2 | 3071.8 | 2872.4 | NDUFAB1    | <a href="#">NM_005003.2</a> | ACP;SDAP                     | NADH       | NADH fatty acid       |
| GI_39753952-S | 563.8  | 425.6  | 419.7  | LOC168850  | <a href="#">NM_176814.3</a> |                              |            |                       |
| GI_39753954-S | 689.7  | 927.9  | 948.4  | MIR16      | <a href="#">NM_016641.3</a> |                              |            |                       |
| GI_39753955-S | 149.1  | 207.5  | 183.3  | KRT6L      | <a href="#">NM_175834.2</a> |                              |            | intermedia            |
| GI_39753956-S | 807.5  | 982    | 1072.1 | LAP1B      | <a href="#">NM_015602.2</a> | MGC3413;DKFZP586G011         |            |                       |
| GI_39753958-S | 482.6  | 654.7  | 566.5  | KCTD9      | <a href="#">NM_017634.2</a> | FLJ20038                     |            |                       |
| GI_39753960-S | 1353.8 | 1304.1 | 2108.3 | IQGAP3     | <a href="#">NM_178229.3</a> | MGC1947;MGC10170;MGC10831    | Ras        | small                 |
| GI_39753962-S | 107.4  | 117.3  | 114.8  | GPB5       | <a href="#">NM_145171.2</a> |                              | hormone    | extracellul           |
| GI_39753964-S | 784.8  | 1034.1 | 964.1  | HIAT1      | <a href="#">NM_033055.2</a> | DKFZP564L0864                | transporte | integral to transport |
| GI_39753966-S | 107.6  | 114.4  | 107.8  | CSPG5      | <a href="#">NM_006574.2</a> | NGC                          | chondroiti | proteoglyc            |

|               |        |        |        |          |                             |                                     |             |                      |
|---------------|--------|--------|--------|----------|-----------------------------|-------------------------------------|-------------|----------------------|
| GI_39753967-S | 107.3  | 109.7  | 107.6  | FLJ46354 | <a href="#">NM_198547.1</a> |                                     |             |                      |
| GI_39753969-S | 142.7  | 163    | 165.2  | CAMP     | <a href="#">NM_004345.3</a> | LL37;CAP18;FALL39;FALL-39           | antimicrob  | extracellul defense  |
| GI_39777581-S | 113.5  | 137.5  | 109.3  | DHX57    | <a href="#">NM_144995.2</a> | FLJ32861                            | nucleic     |                      |
| GI_39777585-I | 90.6   | 100    | 97.6   | DHX57    | <a href="#">NM_198963.1</a> | FLJ32861                            | nucleic     |                      |
| GI_39777587-I | 218.8  | 279.6  | 241.6  | NOL6     | <a href="#">NM_022917.4</a> | NRAP;FLJ21959;MGC14896;MGC14921;MG  |             |                      |
| GI_39777589-A | 466.5  | 540.4  | 467.7  | NOL6     | <a href="#">NM_139235.3</a> | NRAP;FLJ21959;MGC14896;MGC14921;MG  |             |                      |
| GI_39777590-S | 132.6  | 158.2  | 147.4  | SLC13A3  | <a href="#">NM_022829.3</a> | NADC3;SDCT2                         | transporte  | integral to sodium   |
| GI_39777591-S | 126    | 133.1  | 95.8   | SLC2A10  | <a href="#">NM_030777.3</a> | GLUT10                              | transporte  | integral to glucose  |
| GI_39777592-S | 290    | 272.3  | 293    | SLC2A4RG | <a href="#">NM_020062.3</a> | GEF;HDBP1                           | transcripti | nucleus regulation   |
| GI_39777593-S | 492.9  | 309.5  | 336.2  | SLCO4A1  | <a href="#">NM_016354.3</a> | POAT;OATP1;OATP-                    | transporte  | integral to ion      |
| GI_39777595-S | 744.8  | 807    | 574.2  | TGIF2    | <a href="#">NM_021809.4</a> |                                     | transcripti | nucleus regulation   |
| GI_39777598-I | 868    | 1169.4 | 1212.4 | TGM2     | <a href="#">NM_198951.1</a> | TGC                                 | acyltransf  | cellular_co protein  |
| GI_39777600-S | 176.1  | 199.1  | 190.4  | TGM3     | <a href="#">NM_003245.2</a> | TGE;TGX                             | acyltransf  | protein              |
| GI_39777602-S | 269.4  | 218.2  | 192.4  | ARHGEF1  | <a href="#">NM_004706.3</a> | GEF1;LBCL2;SUB1.5;P115-RHOGEF       | Rho         | cytoplasm Rho        |
| GI_39777607-A | 2764.3 | 3300.4 | 3898.3 | SEMA4B   | <a href="#">NM_020210.2</a> | SemC;SEMAG;KIAA1745                 | receptor    | integral to developm |
| GI_39777609-I | 160.2  | 185.3  | 176.8  | SEMA4B   | <a href="#">NM_198925.1</a> | SemC;SEMAG;KIAA1745                 | receptor    | integral to developm |
| GI_39777611-A | 349.3  | 459.8  | 558.8  | SS18L1   | <a href="#">NM_015558.3</a> | CREST;KIAA0693;MGC26711             |             |                      |
| GI_39777613-I | 124.3  | 129.3  | 121.2  | SS18L1   | <a href="#">NM_198935.1</a> | CREST;KIAA0693;MGC26711             |             |                      |
| GI_39777615-A | 1208.9 | 1109.4 | 1128.1 | SNX14    | <a href="#">NM_020468.2</a> | RGS-PX2;MGC13217                    | protein     | intracellula         |
| GI_39777616-I | 105.7  | 125.9  | 118    | SNX14    | <a href="#">NM_153816.2</a> | RGS-PX2;MGC13217                    | protein     | intracellula         |
| GI_39777617-I | 204    | 210.9  | 156    | SYNGR1   | <a href="#">NM_004711.3</a> | MGC:1939                            | transporte  | synaptic transport   |
| GI_39777618-I | 225.3  | 308.2  | 198.3  | SYNGR1   | <a href="#">NM_145731.2</a> | MGC:1939                            | transporte  | synaptic transport   |
| GI_39780551-S | 1086.4 | 1061.6 | 1368.4 | FLJ10305 | <a href="#">NM_018052.3</a> |                                     |             |                      |
| GI_39780570-S | 500.1  | 516.6  | 422    | FLJ10504 | <a href="#">NM_018116.2</a> | LST005                              |             |                      |
| GI_39780587-S | 338.2  | 321.2  | 293.5  | FLJ10534 | <a href="#">NM_018128.4</a> | KIAA1401                            |             |                      |
| GI_39780596-S | 124.8  | 130.9  | 125.3  | FLJ10781 | <a href="#">NM_018215.2</a> |                                     |             |                      |
| GI_39811997-A | 679.5  | 723.9  | 710    | AES      | <a href="#">NM_001130.5</a> | GRG;ESP1;AES-1/AES-2                | nucleus     | histogene            |
| GI_39812018-I | 132.6  | 143.2  | 134.1  | AES      | <a href="#">NM_198969.1</a> | GRG;ESP1;AES-1/AES-2                | nucleus     | histogene            |
| GI_39812034-S | 117.3  | 129.7  | 129.3  | ARRB2    | <a href="#">NM_004313.3</a> | ARB2;ARR2                           | cytoplasm   | sensory              |
| GI_39812062-S | 2064.1 | 2803.4 | 2628.9 | MRPL28   | <a href="#">NM_006428.3</a> | p15;MAAT1;MGC8499                   | tumor       |                      |
| GI_39812071-S | 799.6  | 802.7  | 363.8  | MRPS26   | <a href="#">NM_030811.3</a> | GI008;RPMS13;MRP-S13;MRP-S26;NY-BR- |             |                      |
| GI_39812087-A | 1117.4 | 1607.1 | 2056.2 | TDE1     | <a href="#">NM_006811.2</a> | TDE;TMS-1;DIFF33;SBB199             |             | integral to          |
| GI_39812105-I | 168.3  | 224.7  | 326.3  | TDE1     | <a href="#">NM_198941.1</a> | TDE;TMS-1;DIFF33;SBB199             |             | integral to          |
| GI_39812114-S | 157.3  | 178    | 183.4  | ACTR8    | <a href="#">NM_022899.3</a> | ARP8;FLJ12934;FLJ22579              |             |                      |
| GI_39812132-S | 123    | 121    | 111.9  | ANKRD2   | <a href="#">NM_020349.2</a> | AARP                                |             |                      |
| GI_39812180-S | 106.9  | 124.3  | 110.5  | MGAT5B   | <a href="#">NM_144677.2</a> | GnT-IX;GnT-VB;FLJ25132              |             |                      |
| GI_39812196-I | 94.6   | 112.1  | 95.3   | MGAT5B   | <a href="#">NM_198955.1</a> | GnT-IX;GnT-VB;FLJ25132              |             |                      |
| GI_39812204-S | 885.9  | 892.4  | 731.2  | KIAA0999 | <a href="#">NM_025164.3</a> | FLJ12240                            | ATP         | protein              |
| GI_39812228-S | 145.2  | 159.7  | 139.7  | KPNA5    | <a href="#">NM_002269.2</a> | SRP6;IPOA6                          | protein     | importin, NLS-       |
| GI_39812261-S | 108.9  | 114.8  | 96.7   | HIST1H3D | <a href="#">NM_003530.3</a> | H3/b;H3FB                           | DNA         | chromoso nucleoso    |
| GI_39812281-S | 8322.8 | 5532.6 | 5570.9 | HSPA9B   | <a href="#">NM_004134.4</a> | CSA;MOT;MOT2;GRP75;HSPA9;PBP74;mot- | ATP         | cytoplasm            |
| GI_39812319-S | 231.7  | 188.5  | 174.9  | LRRC16   | <a href="#">NM_017640.2</a> | FLJ20048;dJ501N12.1                 |             |                      |
| GI_39812335-S | 7996.2 | 9139.3 | 8945.9 | NDUFS6   | <a href="#">NM_004553.2</a> |                                     | iron-sulfur | NADH mitochond       |
| GI_39812354-S | 122.7  | 127.8  | 120.7  | OR7C1    | <a href="#">NM_198944.1</a> | OR7C4;OR19-5;TPCR86;HSTPCR86P;CIT-  | G-protein   | physiologi           |



|               |        |        |        |            |                             |                                       |             |              |              |
|---------------|--------|--------|--------|------------|-----------------------------|---------------------------------------|-------------|--------------|--------------|
| GI_39812361-S | 1804.6 | 2396   | 2740.7 | PSMD8      | <a href="#">NM_002812.3</a> | S14;p31;HIP6;HYPF;Nin1p;MGC1660       |             | proteasom    | regulation   |
| GI_39812377-S | 443.9  | 424.7  | 407.8  | RANBP9     | <a href="#">NM_005493.2</a> | RANBPM                                | RAN         | microtubul   | microtubul   |
| GI_39812393-S | 991.3  | 902.9  | 813.9  | REPS1      | <a href="#">NM_031922.2</a> | RALBP1                                | calcium     |              |              |
| GI_39812410-S | 36099  | 34618  | 30543  | RPS4X      | <a href="#">NM_001007.3</a> | CCG2;SCAR;SCR10;DXS306                | structural  | cytosolic    | protein      |
| GI_39812427-S | 1283.7 | 1997.5 | 1130.7 | SC65       | <a href="#">NM_006455.2</a> | NOL55                                 |             | nuclear      | synaptone    |
| GI_39812446-S | 90.9   | 103.9  | 102    | SRD5A2     | <a href="#">NM_000348.2</a> |                                       | electron    | microsom     | androgen     |
| GI_39812452-S | 1390.2 | 1414.7 | 1200.5 | SURF6      | <a href="#">NM_006753.3</a> | FLJ30322                              | RNA         | nucleolus    |              |
| GI_39812473-S | 251.1  | 662    | 1132.3 | TFAP2C     | <a href="#">NM_003222.3</a> | ERF1;AP2-GAMMA                        | transcripti | nucleus      | oncogene     |
| GI_39812483-A | 1657.5 | 1891.7 | 2636   | TH1L       | <a href="#">NM_016397.2</a> | TH1;NELF-C;NELF-D;HSPC130             |             |              |              |
| GI_39812491-I | 3032.8 | 3117.6 | 4547.1 | TH1L       | <a href="#">NM_198976.1</a> | TH1;NELF-C;NELF-D;HSPC130             |             |              |              |
| GI_39812495-A | 99.5   | 105.6  | 89.6   | SP8        | <a href="#">NM_182700.2</a> | BTD                                   | DNA         | nucleus      |              |
| GI_39812500-I | 150    | 169.3  | 152.1  | SP8        | <a href="#">NM_198956.1</a> | BTD                                   | DNA         | nucleus      |              |
| GI_39841070-S | 195.9  | 206    | 212.7  | ZNF322B    | <a href="#">NM_199005.1</a> | ZNF322                                |             |              |              |
| GI_39841072-S | 1001   | 986.8  | 816.2  | FLJ10379   | <a href="#">NM_018079.3</a> |                                       | RNA         |              |              |
| GI_39930312-S | 218.5  | 215.2  | 220.1  | IRLB       | <a href="#">NM_005848.1</a> |                                       | DNA         | nucleus      | regulation   |
| GI_39930314-S | 450.6  | 533.5  | 461.5  | NXP4       | <a href="#">NM_007224.1</a> | NPH4                                  | receptor    | extracellul  | neuropepti   |
| GI_39930340-S | 612.3  | 465.3  | 318.1  | KIAA0970   | <a href="#">NM_014923.2</a> |                                       |             |              |              |
| GI_39930342-S | 440.6  | 457.6  | 397.1  | KIAA0779   | <a href="#">NM_015008.1</a> |                                       |             |              | integral to  |
| GI_39930344-S | 169.7  | 187.2  | 159.6  | KIAA0251   | <a href="#">NM_015027.1</a> |                                       | lyase       |              | amino        |
| GI_39930346-S | 84.7   | 106.4  | 91.9   | PIP5K3     | <a href="#">NM_015040.1</a> | p235;PIP5K;PIKfyve;KIAA0981;MGC40423  | kinase      |              | intracellula |
| GI_39930348-S | 2006.8 | 1770.4 | 1306.4 | KIAA0746   | <a href="#">NM_015187.1</a> |                                       |             |              |              |
| GI_39930350-S | 193.7  | 174.7  | 142.4  | KIAA1010   | <a href="#">NM_015221.1</a> | TUBA                                  | guanyl-     |              | endocytosi   |
| GI_39930352-S | 1474.3 | 1448.3 | 1226.9 | KIAA0052   | <a href="#">NM_015360.2</a> |                                       | nucleic     | nucleus      |              |
| GI_39930354-S | 776    | 1228.3 | 907.7  | DPCD       | <a href="#">NM_015448.1</a> | DKFZP566F084                          |             |              |              |
| GI_39930360-S | 1663.4 | 1606.6 | 1988.8 | DKFZP434C1 | <a href="#">NM_015518.1</a> |                                       | protein-    |              | protein      |
| GI_39930366-S | 172.6  | 226    | 179.6  | SEMA5B     | <a href="#">NM_018987.1</a> | SemG;SEMAG;FLJ10372;KIAA1445          | receptor    | membran      | developm     |
| GI_39930374-S | 167    | 192.3  | 143.1  | ENAH       | <a href="#">NM_018212.2</a> | NDPP1;FLJ10773                        |             |              |              |
| GI_39930376-S | 96.1   | 115.5  | 100.1  | KIAA1164   | <a href="#">NM_019092.1</a> |                                       | ATP         |              | proteolysis  |
| GI_39930378-S | 533.8  | 481.6  | 432.7  | LRR8       | <a href="#">NM_019594.1</a> | FLJ10337;KIAA1437                     |             |              |              |
| GI_39930382-S | 375.9  | 473.9  | 430.9  | BARHL2     | <a href="#">NM_020063.1</a> |                                       | DNA         | nucleus      | regulation   |
| GI_39930384-S | 199.4  | 350    | 225.9  | KIAA1217   | <a href="#">NM_019590.1</a> | DKFZP761L0424                         |             |              |              |
| GI_39930390-S | 494.7  | 747.3  | 570.9  | KIAA1463   | <a href="#">NM_020849.1</a> |                                       | catalytic   |              | metabolis    |
| GI_39930392-S | 368.3  | 313.2  | 318.1  | C9orf102   | <a href="#">NM_020207.1</a> |                                       | helicase    |              |              |
| GI_39930394-S | 233.9  | 377.2  | 318.9  | KIAA1618   | <a href="#">NM_020954.1</a> |                                       | transcripti | intracellula | regulation   |
| GI_39930396-S | 231    | 253    | 223.8  | KIAA1387   | <a href="#">NM_020463.1</a> |                                       |             |              |              |
| GI_39930398-S | 378.9  | 482.2  | 875.2  | C20orf110  | <a href="#">NM_021202.1</a> | PINH;FLJ21759;FLJ23500;dJ1181N3.1;DKF |             |              | microfibril  |
| GI_39930400-S | 123.4  | 136    | 120.7  | KIAA1465   | <a href="#">NM_020851.1</a> |                                       |             |              |              |
| GI_39930402-S | 278.7  | 341.7  | 309.3  | LGR6       | <a href="#">NM_021636.1</a> | FLJ14471;VTS20631                     |             |              |              |
| GI_39930458-S | 733.5  | 1032.3 | 839.3  | IRX3       | <a href="#">NM_024336.1</a> | IRX-1                                 | transcripti | nucleus      | regulation   |
| GI_39930462-S | 137.7  | 140.3  | 123.1  | KIAA1701   | <a href="#">NM_030639.1</a> |                                       |             |              |              |
| GI_39930468-S | 1016.6 | 670.4  | 549.8  | BXDC1      | <a href="#">NM_032194.1</a> | FLJ21087;bA397G5.4                    |             | nucleus      |              |
| GI_39930470-S | 295    | 282    | 284    | FLJ22789   | <a href="#">NM_032230.1</a> |                                       |             |              |              |
| GI_39930472-S | 315.5  | 248.6  | 326    | MLR2       | <a href="#">NM_032440.1</a> | LCOR;KIAA1795                         | DNA         | nucleus      | regulation   |
| GI_39930474-S | 375.3  | 339.1  | 400.3  | IRX2       | <a href="#">NM_033267.1</a> |                                       | transcripti | nucleus      | regulation   |

|               |        |        |        |             |                             |                                    |            |              |             |
|---------------|--------|--------|--------|-------------|-----------------------------|------------------------------------|------------|--------------|-------------|
| GI_39930478-S | 172.1  | 347.6  | 295.9  | DIXDC1      | <a href="#">NM_033425.1</a> | KIAA1735                           | signal     | intracellula | frizzled    |
| GI_39930482-S | 126    | 159.3  | 134.5  | IMAGE:42153 | <a href="#">NM_052878.1</a> |                                    |            |              |             |
| GI_39930484-S | 510.1  | 465.9  | 455.6  | MCSC        | <a href="#">NM_052901.1</a> | KIAA1896                           | binding    | mitochond    | transport   |
| GI_39930510-S | 687.3  | 394.7  | 239.1  | FLJ30681    | <a href="#">NM_133459.1</a> | KIAA1983                           | calcium    |              |             |
| GI_39930516-S | 172.7  | 184.5  | 219.2  | LOC90378    | <a href="#">NM_138352.1</a> |                                    |            |              |             |
| GI_39930520-S | 1888.8 | 3856.6 | 3030.2 | LOC114990   | <a href="#">NM_138440.1</a> |                                    |            |              |             |
| GI_39930522-S | 134.6  | 159.3  | 162.4  | LOC144097   | <a href="#">NM_138471.1</a> |                                    |            |              |             |
| GI_39930526-S | 3595.5 | 2566.5 | 1726.8 | TNNT1       | <a href="#">NM_003283.3</a> | ANM                                | tropomyos  |              | regulation  |
| GI_39930528-S | 208    | 254.9  | 238.4  | UPA         | <a href="#">NM_145202.2</a> |                                    |            |              |             |
| GI_39930530-S | 289.4  | 333.1  | 305.9  | MGC34132    | <a href="#">NM_173654.1</a> |                                    |            |              |             |
| GI_39930532-S | 290.7  | 327.5  | 285.4  | MGC19531    | <a href="#">NM_005167.4</a> | DKFZp434P1514                      | catalytic  |              |             |
| GI_39930536-S | 134.1  | 192.9  | 141    | HMGCS1      | <a href="#">NM_002130.3</a> | HMGCS                              | hydroxym   | soluble      | lipid       |
| GI_39930540-S | 918.6  | 834.5  | 832    | LOC286257   | <a href="#">NM_183241.1</a> |                                    |            |              |             |
| GI_39930546-S | 271.2  | 306    | 263.1  | FLJ39441    | <a href="#">NM_194285.1</a> |                                    |            |              |             |
| GI_39930568-S | 141.9  | 153.4  | 191.3  | LOC116236   | <a href="#">NM_198147.1</a> |                                    |            |              |             |
| GI_39930570-S | 169.9  | 204.5  | 210.1  | DKFZp761L1  | <a href="#">NM_198075.1</a> |                                    |            |              |             |
| GI_39930572-S | 227    | 277.5  | 242.5  | LOC119587   | <a href="#">NM_198148.1</a> |                                    | carboxype  |              | proteolysis |
| GI_39930574-S | 96.4   | 122.9  | 108.3  | C1orf40     | <a href="#">NM_198149.1</a> |                                    |            |              |             |
| GI_39930576-S | 6443   | 7705.9 | 7070.4 | DKFZp313G1  | <a href="#">NM_198150.1</a> |                                    | sulfuric   |              | metabolis   |
| GI_39930584-S | 165.2  | 179.2  | 173.7  | ZNF600      | <a href="#">NM_198457.1</a> | KR-ZNF1;DKFZp686F06123             |            | nucleus      |             |
| GI_39930586-S | 118.7  | 120.4  | 119.5  | ZNF568      | <a href="#">NM_198539.1</a> | FLJ35804;DKFZp686B0797             | nucleic    | nucleus      | regulation  |
| GI_39930590-S | 219.7  | 283.2  | 243.8  | GANC        | <a href="#">NM_198141.1</a> |                                    | hydrolase  |              | carbohydr   |
| GI_39930600-S | 893.6  | 781.3  | 957.1  | SPATA11     | <a href="#">NM_032306.2</a> | UNQ6002;MGC10974                   |            |              |             |
| GI_39930601-S | 128    | 145.5  | 133.5  | TRF3        | <a href="#">NM_199047.1</a> |                                    |            |              |             |
| GI_39930603-S | 174.2  | 179.2  | 153.9  | SOS2        | <a href="#">NM_006939.1</a> |                                    | guanyl-    | cellular_co  | small       |
| GI_39930609-I | 168.5  | 196    | 179.2  | SCN1B       | <a href="#">NM_199037.1</a> | GEFSP1                             | voltage-   | integral to  | sodium      |
| GI_39930611-I | 2583   | 4326.5 | 2951.3 | KLHL5       | <a href="#">NM_199039.1</a> |                                    | actin      | cytoskelet   | actin       |
| GI_39932584-S | 90.4   | 90.1   | 73.2   | C10orf24    | <a href="#">NM_152709.2</a> | FLJ25162                           |            |              |             |
| GI_39932586-S | 113.9  | 130.3  | 131.4  | C14orf101   | <a href="#">NM_017799.2</a> | FLJ20392                           |            | integral to  |             |
| GI_39932588-S | 367.9  | 223.7  | 189.2  | ARHGAP18    | <a href="#">NM_033515.2</a> | MacGAP;bA307O14.2                  |            |              |             |
| GI_39979625-S | 99     | 120    | 129.5  | FLJ13646    | <a href="#">NM_024584.2</a> |                                    | structural | microtubul   | microtubul  |
| GI_39979635-S | 546.1  | 564.4  | 595.4  | NOL8        | <a href="#">NM_017948.3</a> | Nop132;C9orf34;FLJ20736            |            |              |             |
| GI_39979637-S | 160.3  | 177.6  | 152.6  | DBCCR1L     | <a href="#">NM_199051.1</a> |                                    |            |              |             |
| GI_39995057-I | 149.4  | 170.5  | 154.4  | CASP2       | <a href="#">NM_001224.3</a> | ICH1;NEDD2;CASP-2;ICH-1L;ICH-1L/1S | caspase-2  |              | apoptotic   |
| GI_39995062-A | 192.5  | 181.8  | 242.6  | CASP2       | <a href="#">NM_032984.2</a> | ICH1;NEDD2;CASP-2;ICH-1L;ICH-1L/1S | caspase-2  |              | apoptotic   |
| GI_39995063-S | 219.9  | 291.8  | 270.9  | PANX1       | <a href="#">NM_015368.3</a> | MRS1;UNQ2529;MGC21309              |            | gap          |             |
| GI_39995065-S | 105.3  | 121    | 109.7  | PANX2       | <a href="#">NM_052839.2</a> | hPANX2                             |            | gap          |             |
| GI_39995066-S | 107.1  | 106.6  | 97.7   | PANX3       | <a href="#">NM_052959.2</a> |                                    |            | gap          |             |
| GI_39995067-I | 119.2  | 118.6  | 114.8  | EXO1        | <a href="#">NM_130398.2</a> | HEX1;hExol                         | ribonuclea |              | mismatch    |
| GI_39995068-A | 590.8  | 524.1  | 616.2  | EXO1        | <a href="#">NM_003686.3</a> | HEX1;hExol                         | ribonuclea |              | mismatch    |
| GI_39995072-S | 3167.9 | 3805.9 | 2230.2 | CDC37       | <a href="#">NM_007065.3</a> | P50CDC37                           | protein    |              | protein     |
| GI_39995073-A | 305.3  | 316.4  | 388.9  | CDKN2D      | <a href="#">NM_079421.2</a> | p19;INK4D;p19-INK4D                | cyclin-    | cytoplasm    | cell cycle  |
| GI_39995074-I | 120.1  | 130.3  | 131.4  | CDKN2D      | <a href="#">NM_001800.3</a> | p19;INK4D;p19-INK4D                | cyclin-    | cytoplasm    | cell cycle  |
| GI_39995075-S | 1109.1 | 1158.6 | 973.4  | FLJ12716    | <a href="#">NM_021942.4</a> |                                    |            |              |             |

|               |        |        |        |           |                             |                                      |             |              |             |
|---------------|--------|--------|--------|-----------|-----------------------------|--------------------------------------|-------------|--------------|-------------|
| GI_39995079-S | 325    | 318.7  | 317.7  | FLJ13725  | <a href="#">NM_024519.2</a> | KIAA1930                             |             |              |             |
| GI_39995081-S | 5371.2 | 5357.8 | 3559.7 | FLJ20303  | <a href="#">NM_017755.4</a> |                                      |             |              |             |
| GI_39995083-S | 892.8  | 1277.1 | 1130.3 | FLJ21919  | <a href="#">NM_023015.3</a> |                                      |             |              |             |
| GI_39995085-S | 269.9  | 263    | 301.3  | NCKX6     | <a href="#">NM_024959.2</a> | FLJ22233                             |             | integral to  |             |
| GI_39995087-S | 303.7  | 392.7  | 330.8  | PTHLH     | <a href="#">NM_002820.2</a> | HHM;PLP;PTHR;PTHRP;MGC14611          | cAMP        | perinuclea   | epidermal   |
| GI_39995094-S | 115.5  | 150.2  | 174.7  | PTGFR     | <a href="#">NM_000959.2</a> | FP;MGC46203                          | prostaglan  | integral to  | parturition |
| GI_39995095-S | 288.1  | 379.6  | 317.6  | PTGIR     | <a href="#">NM_000960.3</a> | IP;PRIPR                             | prostaglan  | integral to  | G-protein   |
| GI_39995096-S | 244.8  | 194.9  | 133.6  | PTHR1     | <a href="#">NM_000316.2</a> | PTHR                                 | parathyroi  | cytoplasm    | G-protein   |
| GI_39995097-S | 129.1  | 141.2  | 138.8  | PTHR2     | <a href="#">NM_005048.2</a> |                                      | parathyroi  | integral to  | G-protein   |
| GI_39995098-S | 123.8  | 127.7  | 119.6  | PTH       | <a href="#">NM_000315.2</a> |                                      | cAMP        | soluble      | induction   |
| GI_39995106-A | 204.7  | 239.3  | 247.4  | FASTK     | <a href="#">NM_033015.2</a> | FAST;FLJ13079                        | protein     |              | induction   |
| GI_39995108-S | 298.7  | 272    | 171.4  | GM2A      | <a href="#">NM_000405.3</a> | SAP-3                                | sphingolipi | lysosome     | glycosphin  |
| GI_39995110-S | 124    | 185.3  | 136.4  | GSTM3     | <a href="#">NM_000849.3</a> | GST5;GSTB;GTM3;GSTM3-                | glutathion  |              | establish   |
| GI_40018613-S | 202.5  | 281.2  | 284.5  | DRE1      | <a href="#">NM_017644.2</a> | FLJ20059;FLJ22673                    |             |              |             |
| GI_40018619-S | 732.4  | 722.1  | 641.4  | KIAA1055  | <a href="#">NM_015079.2</a> | FLJ20166                             | nucleic     | intracellula | regulation  |
| GI_40018625-S | 684.5  | 794.8  | 676.5  | MOBK2A    | <a href="#">NM_130807.2</a> | moblak                               |             |              |             |
| GI_40018626-I | 187.5  | 190    | 197.2  | MKNK2     | <a href="#">NM_199054.1</a> | MNK2;GPRK7                           | G-protein-  |              | protein     |
| GI_40018628-S | 118.5  | 124.8  | 110.2  | KIAA1033  | <a href="#">NM_015275.1</a> |                                      |             |              |             |
| GI_40018630-A | 544.6  | 520.1  | 404.1  | MKNK2     | <a href="#">NM_017572.2</a> | MNK2;GPRK7                           | G-protein-  |              | protein     |
| GI_40018632-S | 1840   | 2817.6 | 2154.2 | IDI1      | <a href="#">NM_004508.2</a> |                                      | isopenten   | peroxisom    | isoprenoid  |
| GI_40018634-S | 1690   | 1250.8 | 877.9  | FTHFSDC1  | <a href="#">NM_015440.3</a> | FLJ21145;DKFZp586G1517               | formate-    |              | folic acid  |
| GI_40018637-S | 788.8  | 835.9  | 1479.3 | C21orf25  | <a href="#">NM_199050.1</a> | MGC71445;DKFZP586F0422               |             |              |             |
| GI_40018639-S | 310.6  | 331.6  | 303.7  | HRPT2     | <a href="#">NM_024529.3</a> | HPT-JT;C1orf28;FLJ23316              |             |              |             |
| GI_40018643-A | 97.8   | 95     | 101.2  | C14orf118 | <a href="#">NM_017972.2</a> | FLJ10033;FLJ20689                    |             |              |             |
| GI_40018645-I | 139.8  | 154.7  | 160.2  | C14orf118 | <a href="#">NM_017926.2</a> | FLJ10033;FLJ20689                    |             |              |             |
| GI_40018647-S | 5087.7 | 4455.9 | 5041.7 | AP3D1     | <a href="#">NM_003938.4</a> | ADTD                                 | vesicle     | Golgi        | eye         |
| GI_40068036-S | 97     | 98.4   | 98.3   | SIT       | <a href="#">NM_014450.2</a> |                                      | SH3/SH2     | integral to  | signal      |
| GI_40068037-S | 112.2  | 137    | 100.7  | LOC51760  | <a href="#">NM_016524.2</a> |                                      | transporte  | membran      | transport   |
| GI_40068041-S | 184.9  | 197.2  | 163    | HSJ001348 | <a href="#">NM_017527.2</a> |                                      |             |              |             |
| GI_40068043-S | 445.8  | 416.9  | 274.9  | KIAA1495  | <a href="#">NM_020871.2</a> |                                      |             |              |             |
| GI_40068048-S | 271.5  | 348.2  | 367.1  | CNNM3     | <a href="#">NM_017623.3</a> | ACDP3;FLJ20018                       |             |              |             |
| GI_40068050-I | 169.3  | 159.6  | 150.3  | CNNM2     | <a href="#">NM_199077.1</a> | ACDP2;FLJ20064                       |             |              |             |
| GI_40068058-S | 290.1  | 326.3  | 235    | CIR       | <a href="#">NM_004882.3</a> |                                      | transcripti |              | electron    |
| GI_40068060-S | 244.3  | 258.6  | 261.9  | C6orf139  | <a href="#">NM_018132.2</a> | FLJ10545                             |             |              |             |
| GI_40068062-S | 246.8  | 257.8  | 221.7  | C6orf197  | <a href="#">NM_017772.2</a> | FLJ20337;dJ744124.2                  |             |              |             |
| GI_40068064-A | 161.9  | 184.3  | 163    | C21orf58  | <a href="#">NM_058180.2</a> |                                      |             |              |             |
| GI_40068066-I | 90.8   | 96.7   | 88.8   | C21orf58  | <a href="#">NM_199071.1</a> |                                      |             |              |             |
| GI_40068460-S | 1229.6 | 1154   | 1341   | PTK9L     | <a href="#">NM_007284.3</a> | A6RP                                 | actin       | intracellula |             |
| GI_40068461-I | 152.3  | 176.6  | 161.5  | ARID1B    | <a href="#">NM_175863.2</a> | 6A3-                                 | molecular   | cellular_co  | biological_ |
| GI_40068463-A | 301.1  | 330.7  | 296    | ARID1B    | <a href="#">NM_020732.2</a> | 6A3-                                 | molecular   | cellular_co  | biological_ |
| GI_40068465-I | 175    | 209.2  | 197.6  | ARID1B    | <a href="#">NM_017519.1</a> | 6A3-                                 | molecular   | cellular_co  | biological_ |
| GI_40068467-S | 415.1  | 492    | 535.2  | PTGES2    | <a href="#">NM_025072.4</a> | GBF1;PGES2;C9orf15;FLJ14038;MGC11289 | electron    |              | electron    |
| GI_40068474-S | 1429.3 | 1566.7 | 1719.8 | PTK9      | <a href="#">NM_002822.3</a> | A6;MGC23788;MGC41876                 | protein-    | intracellula | protein     |
| GI_40068478-S | 290.2  | 248    | 256    | FLJ22578  | <a href="#">NM_024864.3</a> |                                      | RNA         |              | RNA         |

|               |        |        |        |            |                             |                                   |            |              |             |
|---------------|--------|--------|--------|------------|-----------------------------|-----------------------------------|------------|--------------|-------------|
| GI_40068480-I | 754    | 757    | 742.5  | FLJ23027   | <a href="#">NM_032233.2</a> |                                   |            |              |             |
| GI_40068482-I | 171.2  | 195.7  | 208.4  | FLJ23027   | <a href="#">NM_199123.1</a> |                                   |            |              |             |
| GI_40068484-S | 290.8  | 530.7  | 399.5  | WARP       | <a href="#">NM_022834.3</a> | FLJ22215;DKFZp761O051             |            |              |             |
| GI_40068494-S | 169.8  | 209.5  | 199.9  | MGC20983   | <a href="#">NM_145045.3</a> | FLJ31801                          |            |              |             |
| GI_40068496-S | 546.8  | 596.7  | 536.1  | MGC5297    | <a href="#">NM_024091.2</a> | FLJ23274                          |            |              |             |
| GI_40068498-S | 387.6  | 399.8  | 340.5  | THAP1      | <a href="#">NM_018105.2</a> | FLJ10477;MGC33014                 | DNA        |              |             |
| GI_40068503-S | 6308.9 | 6030.3 | 5483.7 | RARS       | <a href="#">NM_002887.3</a> | ArgRS;MGC8641                     | ATP        | soluble      | arginyl-    |
| GI_40068504-S | 1776.1 | 3135.2 | 3291.3 | BSCL2      | <a href="#">NM_032667.4</a> | SPG17;GNG3LG;SEIPIN;MGC4694       |            |              |             |
| GI_40068508-S | 191.4  | 249.2  | 201    | DOCK11     | <a href="#">NM_144658.2</a> | FLJ32122                          |            |              |             |
| GI_40068510-S | 288.1  | 278.3  | 214.3  | ERCC2      | <a href="#">NM_000400.2</a> | EM9;MAG;XPD                       | DNA        | transcripti  | nucleotide- |
| GI_40068511-S | 980.1  | 607.8  | 242    | FUCA2      | <a href="#">NM_032020.3</a> | MGC1314;dJ20N2.5                  | alpha-L-   |              | carbohydr   |
| GI_40068514-S | 98.3   | 122.7  | 100.9  | KIAA1409   | <a href="#">NM_020818.1</a> | FLJ43337                          |            |              |             |
| GI_40068516-S | 595.1  | 600.9  | 514    | KIN        | <a href="#">NM_012311.2</a> | BTCD;KIN17                        | DNA        | nucleus      |             |
| GI_40068517-S | 800.6  | 1037.2 | 1039.6 | PGD        | <a href="#">NM_002631.2</a> | 6PGD                              | electron   |              | pentose-    |
| GI_40068519-I | 149.3  | 166    | 134.7  | PRO1853    | <a href="#">NM_144736.2</a> |                                   |            |              |             |
| GI_40217610-S | 324.8  | 356.4  | 283.9  | DOCK6      | <a href="#">NM_020812.1</a> | KIAA1395                          | peroxidase |              | response    |
| GI_40217621-S | 106.3  | 113.5  | 110.4  | VAX1       | <a href="#">NM_199131.1</a> |                                   |            |              |             |
| GI_40217625-S | 355.2  | 511.6  | 534.4  | LOC134145  | <a href="#">NM_199133.1</a> |                                   |            |              |             |
| GI_40217627-S | 124    | 136.3  | 101.4  | LOC283970  | <a href="#">NM_199134.1</a> |                                   |            |              |             |
| GI_40217629-S | 84.2   | 78.5   | 93.3   | MGC72075   | <a href="#">NM_199136.1</a> |                                   |            |              |             |
| GI_40217782-S | 249.7  | 239.9  | 243.9  | USP28      | <a href="#">NM_020886.2</a> | KIAA1515                          |            |              |             |
| GI_40217785-I | 332.4  | 331.9  | 342.5  | LRRC1      | <a href="#">NM_018214.3</a> | LANO;FLJ10775;FLJ11834;dJ523E19.1 |            |              |             |
| GI_40217787-S | 153.8  | 187.7  | 171.8  | FLJ35630   | <a href="#">NM_152618.2</a> |                                   | ATP        |              | protein     |
| GI_40217789-S | 504.8  | 533    | 464.6  | ZNF512     | <a href="#">NM_032434.2</a> | KIAA1805                          |            |              |             |
| GI_40217793-S | 187.5  | 217    | 188.6  | FLJ23861   | <a href="#">NM_152519.2</a> |                                   |            |              |             |
| GI_40217795-S | 406.7  | 273    | 336.2  | FLJ23749   | <a href="#">NM_152271.2</a> |                                   | ATP-       |              | ATP-        |
| GI_40217797-S | 221.4  | 261.4  | 223.8  | ZNF585A    | <a href="#">NM_152655.2</a> | FLJ23765                          | nucleic    | intracellula | regulation  |
| GI_40217800-I | 113.1  | 114.9  | 112.3  | FLJ23554   | <a href="#">NM_199124.1</a> |                                   |            |              |             |
| GI_40217802-S | 193.4  | 246.7  | 218.1  | FLJ23420   | <a href="#">NM_025061.3</a> |                                   |            |              |             |
| GI_40217804-S | 137.6  | 143.6  | 146.7  | FLJ23323   | <a href="#">NM_024654.3</a> |                                   |            |              |             |
| GI_40217806-S | 103.7  | 93.8   | 101.1  | FERD3L     | <a href="#">NM_152898.2</a> | NATO3;NTWIST;N-TWIST              |            |              |             |
| GI_40217807-S | 155.4  | 176.2  | 172.2  | Eu-HMTase1 | <a href="#">NM_024757.3</a> | FLJ12879;KIAA1876                 | methyltran | nucleus      | chromatin   |
| GI_40217811-A | 1028.8 | 1078.8 | 1198.7 | TBRG4      | <a href="#">NM_004749.2</a> | CPR2;KIAA0948                     |            |              | cell cycle  |
| GI_40217811-I | 192    | 244.4  | 254.8  | TBRG4      | <a href="#">NM_004749.2</a> | CPR2;KIAA0948                     |            |              | cell cycle  |
| GI_40217814-I | 157.7  | 181.6  | 159    | DDO        | <a href="#">NM_003649.2</a> | DASOX;DDO-1;DDO-2                 | D-         | peroxisom    | aspartate   |
| GI_40217816-S | 123.6  | 136.4  | 125.3  | SLITRK1    | <a href="#">NM_052910.1</a> | KIAA1910                          |            |              |             |
| GI_40217818-S | 94.1   | 88     | 93.6   | SLITRK2    | <a href="#">NM_032539.2</a> | CXorf2;SLITL1;KIAA1854            | DNA        | nucleus      | regulation  |
| GI_40217819-S | 106.2  | 112.4  | 98.7   | SLITRK3    | <a href="#">NM_014926.2</a> | KIAA0848                          |            |              |             |
| GI_40217821-S | 115.5  | 128.2  | 136.2  | SLITRK4    | <a href="#">NM_173078.2</a> | DKFZp547M2010                     |            |              |             |
| GI_40217822-S | 103.4  | 106.6  | 98.4   | SLITRK5    | <a href="#">NM_015567.1</a> | KIAA0918                          |            |              |             |
| GI_40217824-S | 97     | 88.6   | 152.1  | SLITRK6    | <a href="#">NM_032229.2</a> | FLJ22774;DKFZp564O1278            |            |              |             |
| GI_40217826-A | 190.9  | 200.9  | 173.3  | DDO        | <a href="#">NM_004032.2</a> | DASOX;DDO-1;DDO-2                 | D-         | peroxisom    | aspartate   |
| GI_40217828-S | 429.8  | 499.1  | 470.4  | GPR68      | <a href="#">NM_003485.2</a> | OGR1                              | G-protein  | integral to  | G-protein   |
| GI_40217830-A | 111.4  | 1113.9 | 830    | GPRC5C     | <a href="#">NM_022036.2</a> | RAIG3;RAIG-3                      | G-protein  | integral to  | G-protein   |

|               |        |        |        |          |                             |                                  |             |                         |
|---------------|--------|--------|--------|----------|-----------------------------|----------------------------------|-------------|-------------------------|
| GI_40217837-A | 451.2  | 425.1  | 417.8  | WDR4     | <a href="#">NM_033661.3</a> | molecular                        | cellular_co | biological_             |
| GI_40217837-I | 1409.4 | 1226.8 | 1214.7 | WDR4     | <a href="#">NM_033661.3</a> | molecular                        | cellular_co | biological_             |
| GI_40217838-S | 314.8  | 363.5  | 338.8  | FMNL3    | <a href="#">NM_175736.3</a> | WBP3;FHOD3;MGC45819;DKFZp762B245 | actin       | cytokinesi              |
| GI_40217842-S | 128.2  | 130.7  | 129.3  | COMP     | <a href="#">NM_000095.2</a> | MED;EDM1;EPD1;PSACH              | extracellul | extracellul skeletal    |
| GI_40217844-S | 185.4  | 253.3  | 210.5  | ITGAV    | <a href="#">NM_002210.2</a> | CD51;MSK8;VNRA                   | cell        | integrin cell           |
| GI_40217845-S | 1423.2 | 998.2  | 765.4  | XPOT     | <a href="#">NM_007235.3</a> | XPO3                             | tRNA        | exportin nucleocyto     |
| GI_40217846-S | 3077.7 | 3406.6 | 3075.4 | U5-200KD | <a href="#">NM_014014.2</a> | KIAA0788                         | hydrolase   | spliceoso mRNA          |
| GI_40217848-S | 210.6  | 258.7  | 224.9  | ZNF46    | <a href="#">NM_006977.2</a> | KUP                              | transcripti | nucleus regulation      |
| GI_40217850-S | 171.4  | 206.2  | 177.9  | KRT19    | <a href="#">NM_002276.3</a> | K19;CK19;K1CS;MGC15366           | structural  | intermedia              |
| GI_40254414-S | 109.1  | 126.5  | 119.6  | GUCA1A   | <a href="#">NM_000409.2</a> | GCAP;GUCA;GCAP1;GUCA1            | calcium     | vision                  |
| GI_40254417-S | 645.3  | 1099.9 | 962.8  | SMPD1    | <a href="#">NM_000543.2</a> | ASM;NPD                          | sphingom    | lysosome sphingom       |
| GI_40254421-S | 216.3  | 268    | 310.5  | NOS3     | <a href="#">NM_000603.2</a> | eNOS;ECNOS                       | nitric-     | cytoplasm amino         |
| GI_40254423-S | 157.2  | 170.2  | 156    | PEHX     | <a href="#">NM_000444.2</a> | HYP;PEX;XLH;HPDR;HYP1;HPDR1      | zinc ion    | integral to proteolysis |
| GI_40254425-S | 115.9  | 135.1  | 123.7  | NPR1     | <a href="#">NM_000906.2</a> | ANPa;NPRA;ANPRA;GUC2A            | receptor    | integral to regulation  |
| GI_40254427-S | 79.9   | 106.1  | 82.5   | SLC11A1  | <a href="#">NM_000578.2</a> | LSH;NRAMP;NRAMP1                 | transporte  | membran response        |
| GI_40254429-S | 82.9   | 96.3   | 90.6   | PRL      | <a href="#">NM_000948.2</a> |                                  | prolactin   | soluble hemocyte        |
| GI_40254430-S | 239.2  | 275.3  | 265.5  | HTR2B    | <a href="#">NM_000867.2</a> | 5-HT2B;5-HT(2B)                  | serotonin   | integral to G-protein   |
| GI_40254432-S | 95.3   | 117.5  | 91.2   | SST      | <a href="#">NM_001048.2</a> | SMST                             | peptide     | extracellul induction   |
| GI_40254433-S | 108.2  | 127.2  | 111.4  | PDE3B    | <a href="#">NM_000922.2</a> |                                  | cGMP-       | membran signal          |
| GI_40254435-S | 162.6  | 193.2  | 196.3  | PRLR     | <a href="#">NM_000949.2</a> |                                  | prolactin   | embryo                  |
| GI_40254436-S | 211.1  | 257.3  | 224.4  | C16orf3  | <a href="#">NM_001214.2</a> |                                  | molecular   | cellular_co biological_ |
| GI_40254440-S | 111.5  | 113.4  | 98     | NDST1    | <a href="#">NM_001543.2</a> | HSST;NST1                        | heparin N-  | Golgi heparan           |
| GI_40254443-S | 750.3  | 782.9  | 531.3  | SIAH1    | <a href="#">NM_003031.2</a> |                                  | nucleus     | axon                    |
| GI_40254445-S | 124.9  | 131.1  | 121.8  | CUL5     | <a href="#">NM_003478.2</a> | VACM1;VACM-1                     | calcium     | induction               |
| GI_40254447-S | 266.2  | 329.2  | 277.8  | PIK3R3   | <a href="#">NM_003629.2</a> | p55-GAMMA                        | 1-          | phosphoin insulin       |
| GI_40254449-S | 1403.6 | 3539.8 | 915    | IFITM1   | <a href="#">NM_003641.2</a> | 9-27;CD225;IFI17;LEU13           | receptor    | integral to negative    |
| GI_40254451-S | 251.8  | 314.7  | 237.9  | NRP1     | <a href="#">NM_003873.2</a> | NRP;VEGF165R                     | vascular    | integral to axon        |
| GI_40254453-S | 129.8  | 153.3  | 147.6  | ATP1B2   | <a href="#">NM_001678.2</a> | AMOG                             | sodium/po   | integral to small       |
| GI_40254455-S | 103.7  | 110.2  | 106.7  | ATP2B4   | <a href="#">NM_001684.2</a> | PMCA4;ATP2B2                     | calcium-    | integral to small       |
| GI_40254457-S | 425.3  | 408.4  | 354.2  | SLC31A1  | <a href="#">NM_001859.2</a> | CTR1;COPT1                       | copper ion  | integral to copper ion  |
| GI_40254458-S | 103.4  | 98.1   | 106.1  | HAPLN1   | <a href="#">NM_001884.2</a> | CRTL1                            | hyaluronic  | extracellul cell        |
| GI_40254459-S | 638.3  | 898.7  | 878    | CTNNB1   | <a href="#">NM_001904.2</a> | CTNNB                            | tumor       | cytoskelet oncogene     |
| GI_40254460-S | 124.7  | 139.7  | 131.2  | GLRA2    | <a href="#">NM_002063.2</a> | GLR                              | glycine-    | integral to small       |
| GI_40254461-S | 126.4  | 145.7  | 130.9  | GNAQ     | <a href="#">NM_002072.2</a> | G-ALPHA-q                        | heterotrim  | heterotrim phospholi    |
| GI_40254463-S | 308.7  | 392.4  | 337.5  | LEPR     | <a href="#">NM_002303.2</a> | OBR                              | transmem    | integral to energy      |
| GI_40254465-S | 1126.3 | 1113.2 | 844.4  | NCBP1    | <a href="#">NM_002486.2</a> | NCBP;CBP80                       | RNA         | nucleoplas binding to   |
| GI_40254468-S | 462.7  | 592.8  | 511.2  | SLC7A1   | <a href="#">NM_003045.2</a> | ERR;ATRC1;CAT-1;HCAT1;REC1L      | basic       | integral to small       |
| GI_40254469-S | 393    | 702.3  | 386.2  | SPN      | <a href="#">NM_003123.2</a> | LSN;CD43;GPL115                  | binding     | membran negative        |
| GI_40254470-S | 119.9  | 137.7  | 131.6  | UGT8     | <a href="#">NM_003360.2</a> | CGT                              | UDP-        | microsom peripheral     |
| GI_40254472-S | 479.4  | 541.3  | 482.6  | VLDLR    | <a href="#">NM_003383.2</a> |                                  | low-        | plasma memory           |
| GI_40254474-S | 291.1  | 367.5  | 304.2  | HNF4G    | <a href="#">NM_004133.3</a> | NR2A2                            | transcripti | nucleus regulation      |
| GI_40254476-S | 2008.3 | 1789.5 | 1874.9 | DRG1     | <a href="#">NM_004147.2</a> | DRG;NEDD3                        | transcripti | transcripti             |
| GI_40254477-S | 209.5  | 213.3  | 216.2  | SLC1A2   | <a href="#">NM_004171.2</a> | EAAT2;GLT-1                      | L-          | integral to L-          |
| GI_40254479-S | 135.8  | 152    | 143.7  | GFI1B    | <a href="#">NM_004188.2</a> |                                  | specific    | G1-                     |

|               |         |        |        |            |                             |                                     |             |                         |
|---------------|---------|--------|--------|------------|-----------------------------|-------------------------------------|-------------|-------------------------|
| GI_40254481-S | 141.2   | 130.7  | 103.3  | AMY1A      | <a href="#">NM_004038.2</a> | AMY1                                | alpha-      | carbohydr               |
| GI_40254803-S | 116.2   | 117    | 118.4  | FLJ35784   | <a href="#">NM_198534.1</a> |                                     |             |                         |
| GI_40254807-S | 122.3   | 125.4  | 123.5  | PRF1       | <a href="#">NM_005041.2</a> | P1;PFP;HPLH2                        | channel-    | cytosol programm        |
| GI_40254809-S | 171.3   | 182.6  | 170    | NR1D2      | <a href="#">NM_005126.2</a> | RVR;BD73;HZF2;EAR-1r;Hs.37288       | ligand-     | nucleus signal          |
| GI_40254811-S | 253.9   | 269.7  | 264.3  | DOCK3      | <a href="#">NM_004947.2</a> | MOCA;KIAA0299                       |             |                         |
| GI_40254812-S | 112     | 117.5  | 107.1  | GUCA1C     | <a href="#">NM_005459.2</a> | GCAP3                               | calcium     | vision                  |
| GI_40254814-S | 222.3   | 301.3  | 256.5  | GYS2       | <a href="#">NM_021957.2</a> |                                     | glycogen    | glycogen                |
| GI_40254815-S | 3708.9  | 5139.7 | 4784.2 | HSPCA      | <a href="#">NM_005348.2</a> | HSPN;LAP2;HSP86;HSPC1;Hsp89;Hsp90;H | ATP         | cytoplasm biological_   |
| GI_40254817-S | 178.4   | 232.5  | 186.2  | SKIL       | <a href="#">NM_005414.2</a> | SNO                                 | TGFbeta     | nucleus oncogene        |
| GI_40254818-S | 249.3   | 307.4  | 261.5  | KRN1       | <a href="#">NM_005553.2</a> |                                     |             | cytoskelet epidermal    |
| GI_40254820-S | 157.1   | 181    | 162.4  | PRKAB2     | <a href="#">NM_005399.2</a> |                                     |             | signal                  |
| GI_40254821-S | 741.2   | 736.5  | 618.5  | MEF2D      | <a href="#">NM_005920.2</a> |                                     | transcripti | nucleus muscle          |
| GI_40254822-S | 235.8   | 303.9  | 181.1  | INPP5D     | <a href="#">NM_005541.2</a> | SHIP                                | inositol-   | phosphate               |
| GI_40254824-S | 115.9   | 130.2  | 135.9  | PPYR1      | <a href="#">NM_005972.2</a> | Y4;PP1;NPY4R                        | G-protein   | integral to G-protein   |
| GI_40254826-S | 16437.9 | 16842  | 13789  | NACA       | <a href="#">NM_005594.2</a> |                                     |             | nascent nascent         |
| GI_40254828-S | 96.2    | 113.8  | 117.6  | MTHFR      | <a href="#">NM_005957.2</a> |                                     | methylene   | amino                   |
| GI_40254830-S | 302.2   | 355.9  | 276.4  | PRKAA1     | <a href="#">NM_006251.2</a> |                                     | protein     | protein                 |
| GI_40254832-S | 111.2   | 109.7  | 111.8  | HTR3B      | <a href="#">NM_006028.2</a> | 5-HT3B                              | serotonin-  | membran small           |
| GI_40254835-S | 94.7    | 95.7   | 88.5   | PENK       | <a href="#">NM_006211.2</a> |                                     | neuropepti  | soluble signal          |
| GI_40254836-S | 84.3    | 85.7   | 87.6   | GJB6       | <a href="#">NM_006783.2</a> | ED2;EDH;HED;CX30;DFNA3              | connexon    | connexon hearing        |
| GI_40254838-S | 324.6   | 376.8  | 347.2  | PROP1      | <a href="#">NM_006261.2</a> |                                     | RNA         | nucleus central         |
| GI_40254839-S | 5581    | 5737.1 | 4916   | SFRS5      | <a href="#">NM_006925.2</a> | HRS;SRP40                           | pre-mRNA    | nucleus mRNA            |
| GI_40254840-S | 161.1   | 200    | 189.3  | MAN1A2     | <a href="#">NM_006699.2</a> | MAN1B                               | mannosyl-   | Golgi N-glycan          |
| GI_40254841-S | 328.4   | 351    | 282.1  | CENTB2     | <a href="#">NM_012287.3</a> | ACAP2;CNT-B2;KIAA0041               | GTPase      | nucleus                 |
| GI_40254843-S | 139.7   | 179.2  | 162.1  | RIPK3      | <a href="#">NM_006871.2</a> | RIP3                                | protein     | induction               |
| GI_40254845-S | 116     | 126.5  | 118.4  | TFPI       | <a href="#">NM_006287.3</a> | EPI;LACI                            | endopepti   | blood                   |
| GI_40254846-S | 535.4   | 686.7  | 1011.9 | UBL3       | <a href="#">NM_007106.2</a> | HCG-1;PNSC1;DKFZP434K151            |             |                         |
| GI_40254847-S | 1897    | 2316.4 | 2230.7 | MTCH2      | <a href="#">NM_014342.2</a> | HSPC032                             | binding     | mitochond transport     |
| GI_40254848-S | 595.4   | 580.7  | 521.6  | SF3B3      | <a href="#">NM_012426.2</a> | RSE1;SAP130;SF3B130;KIAA0017        | pre-mRNA    | spliceoso mRNA          |
| GI_40254852-S | 150.9   | 153.5  | 164.5  | UBL4       | <a href="#">NM_014235.2</a> | GDX;DXS254E                         | small       | protein                 |
| GI_40254853-S | 285.4   | 381.6  | 228.3  | KIAA0773   | <a href="#">NM_014690.2</a> |                                     |             |                         |
| GI_40254856-S | 311.5   | 431    | 466.7  | KIAA1036   | <a href="#">NM_014909.2</a> |                                     |             |                         |
| GI_40254857-S | 362.6   | 492.3  | 389.6  | DZIP3      | <a href="#">NM_014648.2</a> | KIAA0675                            |             |                         |
| GI_40254858-S | 3016.4  | 2399.8 | 2626   | KIAA0664   | <a href="#">NM_015229.2</a> |                                     | translation | protein                 |
| GI_40254862-S | 166.8   | 182.1  | 175.6  | CDK11      | <a href="#">NM_015076.2</a> | KIAA1028;bA346C16.3                 | ATP         | protein                 |
| GI_40254863-S | 102.1   | 144.5  | 84.9   | DKFZP586A0 | <a href="#">NM_014033.2</a> |                                     | S-          |                         |
| GI_40254865-S | 668.2   | 729.4  | 807.1  | DKFZP564O1 | <a href="#">NM_014043.2</a> |                                     | molecular   |                         |
| GI_40254867-S | 1340.9  | 1236.5 | 1071.6 | ZZZ3       | <a href="#">NM_015534.3</a> | DKFZP564I052                        | DNA         | nucleus                 |
| GI_40254868-S | 1323    | 1673.6 | 1684.6 | PRPF31     | <a href="#">NM_015629.2</a> | RP11;PRP31;NY-BR-99;DKFZp566J153    |             |                         |
| GI_40254870-S | 92.9    | 102.5  | 103.6  | DESC1      | <a href="#">NM_014058.2</a> |                                     | trypsin     | integral to proteolysis |
| GI_40254872-S | 248.2   | 364.4  | 226.1  | HSPC049    | <a href="#">NM_014149.2</a> |                                     |             |                         |
| GI_40254874-S | 1789.9  | 2067.1 | 1967.6 | VDRIP      | <a href="#">NM_014166.2</a> | DRIP36;HSPC126                      | RNA         | mediator transcripti    |
| GI_40254875-S | 3112    | 3323.5 | 3544.9 | LOC51248   | <a href="#">NM_016484.3</a> |                                     | protein     | intracellula            |
| GI_40254876-S | 92.7    | 99.2   | 106.8  | ZNF571     | <a href="#">NM_016536.2</a> | HSPC059                             | nucleic     | nucleus regulation      |

|               |        |        |        |            |                             |                                      |            |                     |
|---------------|--------|--------|--------|------------|-----------------------------|--------------------------------------|------------|---------------------|
| GI_40254878-S | 112.5  | 120.3  | 109.1  | CGI-77     | <a href="#">NM_016023.2</a> |                                      |            |                     |
| GI_40254881-S | 271.6  | 370    | 277.5  | C21orf91   | <a href="#">NM_017447.2</a> | YG81;C21orf38                        |            |                     |
| GI_40254883-S | 188.9  | 261.2  | 255.2  | SSH1       | <a href="#">NM_018984.2</a> | SSH-1;KIAA1298                       |            |                     |
| GI_40254885-S | 221.3  | 252.7  | 241.8  | CXorf9     | <a href="#">NM_018990.2</a> | SLY;753P9                            |            |                     |
| GI_40254886-S | 141.9  | 138.5  | 135.9  | 1-Sep      | <a href="#">NM_019001.2</a> | XRN1;DKFZp434P0721                   | nuclease   | cytoplasm RNA       |
| GI_40254888-S | 129.2  | 139.8  | 119.8  | FLJ10895   | <a href="#">NM_019084.2</a> |                                      |            | nucleus regulation  |
| GI_40254890-S | 118.1  | 120.7  | 131.8  | FLJ20674   | <a href="#">NM_019086.2</a> |                                      |            |                     |
| GI_40254892-S | 634    | 536.8  | 537.9  | FLJ11273   | <a href="#">NM_018374.2</a> |                                      |            |                     |
| GI_40254894-S | 986.7  | 833.5  | 960.6  | FLJ10349   | <a href="#">NM_018066.2</a> |                                      | ATP        |                     |
| GI_40254896-S | 851    | 712.1  | 561.3  | DKFZp434K1 | <a href="#">NM_017606.2</a> |                                      |            |                     |
| GI_40254897-S | 161.2  | 188.1  | 165.9  | FLJ20032   | <a href="#">NM_017628.2</a> |                                      |            |                     |
| GI_40254903-S | 119.1  | 117.1  | 101.1  | FLJ20321   | <a href="#">NM_017766.2</a> |                                      |            |                     |
| GI_40254905-S | 163.5  | 179.7  | 164    | ELOVL2     | <a href="#">NM_017770.2</a> | Ssc2;FLJ20334                        |            | endoplas fatty acid |
| GI_40254907-S | 121.6  | 121.1  | 118.8  | C21orf55   | <a href="#">NM_017833.2</a> | C21orf78;FLJ20461                    | chaperone  |                     |
| GI_40254909-S | 2623.5 | 2077.8 | 1762.4 | FLJ20527   | <a href="#">NM_017863.2</a> |                                      |            |                     |
| GI_40254910-S | 866.8  | 777.8  | 524.9  | C20orf27   | <a href="#">NM_017874.2</a> | FLJ20550                             |            |                     |
| GI_40254914-S | 118.3  | 127.6  | 140.2  | C13orf11   | <a href="#">NM_017905.2</a> | FLJ20623                             |            |                     |
| GI_40254916-S | 169.7  | 218    | 184.4  | FLJ10060   | <a href="#">NM_017986.2</a> | GPCR;PAR2;GPCR42                     |            |                     |
| GI_40254918-S | 451.9  | 442    | 232.9  | FLJ10726   | <a href="#">NM_018195.2</a> |                                      |            |                     |
| GI_40254920-S | 80.2   | 80.3   | 88.2   | FLJ11155   | <a href="#">NM_018342.2</a> |                                      |            |                     |
| GI_40254922-S | 280.6  | 356.8  | 328.7  | LIN7C      | <a href="#">NM_018362.2</a> | VELI3;LIN-7C;MALS-3;LIN-7-C;FLJ11215 | protein    | intracellula        |
| GI_40254923-S | 2206.1 | 3159.8 | 3253.7 | PRO1855    | <a href="#">NM_018509.2</a> |                                      |            |                     |
| GI_40254925-S | 399.9  | 535.9  | 501.9  | GNG12      | <a href="#">NM_018841.2</a> |                                      | signal     | heterotrim signal   |
| GI_40254927-S | 208.7  | 328    | 197.8  | SLC39A9    | <a href="#">NM_018375.2</a> | FLJ11274                             | metal ion  | membran metal ion   |
| GI_40254929-S | 268.1  | 292.1  | 303.4  | KBRAS1     | <a href="#">NM_020345.2</a> |                                      | small      | cellular_co NIK-I-  |
| GI_40254930-S | 346.4  | 370.3  | 431.8  | FLJ10706   | <a href="#">NM_018186.2</a> |                                      | cysteine-  | proteolysis         |
| GI_40254932-S | 427.4  | 357.1  | 372.4  | PHTF2      | <a href="#">NM_020432.2</a> | DKFZP564F013                         |            |                     |
| GI_40254935-S | 79.1   | 95.3   | 84.5   | AD026      | <a href="#">NM_020683.3</a> | bA552M11.5                           |            |                     |
| GI_40254937-S | 280.7  | 314.9  | 322.7  | ADCK1      | <a href="#">NM_020421.2</a> | FLJ39600                             |            |                     |
| GI_40254939-S | 118    | 118.8  | 120.8  | ZNF530     | <a href="#">NM_020880.2</a> | KIAA1508                             |            | nucleus             |
| GI_40254942-S | 162.6  | 190.6  | 173.2  | KIAA1560   | <a href="#">NM_020918.2</a> | GPAM;MGC26846                        | acyltransf | mitochond metabolis |
| GI_40254944-S | 156.3  | 186.1  | 150.3  | ZNF295     | <a href="#">NM_020727.2</a> | KIAA1227                             | protein    | nucleus regulation  |
| GI_40254948-S | 104.7  | 124.1  | 120.8  | EPB41L5    | <a href="#">NM_020909.2</a> | BE37;FLJ12957;KIAA1548               |            | cytoskelet          |
| GI_40254950-S | 1645.5 | 2503.8 | 2709.8 | TRAPPC1    | <a href="#">NM_021210.2</a> | BET5;MUM2                            |            | Golgi transport     |
| GI_40254951-S | 208.8  | 242.2  | 219.6  | HPSE2      | <a href="#">NM_021828.2</a> | HPA2;HPR2                            |            |                     |
| GI_40254954-S | 207.3  | 265    | 269.5  | FLJ23360   | <a href="#">NM_023076.2</a> |                                      |            |                     |
| GI_40254956-S | 261.8  | 249    | 218.3  | FLJ13171   | <a href="#">NM_023923.2</a> |                                      | binding    | mitochond transport |
| GI_40254958-S | 399.6  | 465.5  | 540.1  | FLJ22169   | <a href="#">NM_024085.2</a> | MGD3208                              |            |                     |
| GI_40254960-S | 388.1  | 475.8  | 421.6  | MGC3067    | <a href="#">NM_024295.3</a> | PRO2577;FLJ13784                     |            |                     |
| GI_40254961-S | 385.4  | 429.5  | 412.1  | FLJ23548   | <a href="#">NM_024590.2</a> |                                      |            |                     |
| GI_40254963-S | 205    | 231.9  | 211.5  | TIRP       | <a href="#">NM_021649.2</a> | TRAM;TICAM2;TICAM-2                  | transmem   | membran             |
| GI_40254964-S | 213.2  | 212    | 190.9  | FLJ11753   | <a href="#">NM_024659.2</a> | PRO0159                              |            |                     |
| GI_40254966-S | 104.9  | 100.9  | 109.2  | FLJ21924   | <a href="#">NM_024774.2</a> |                                      |            |                     |
| GI_40254968-S | 265.3  | 377.5  | 340.8  | FLJ22494   | <a href="#">NM_024815.2</a> |                                      |            |                     |

|               |        |        |        |           |                             |                                   |  |           |                         |
|---------------|--------|--------|--------|-----------|-----------------------------|-----------------------------------|--|-----------|-------------------------|
| GI_40254970-S | 217.6  | 281.3  | 231.1  | FLJ23447  | <a href="#">NM_024825.2</a> |                                   |  |           |                         |
| GI_40254972-S | 210.3  | 240.8  | 207.6  | FLJ14213  | <a href="#">NM_024841.2</a> |                                   |  |           |                         |
| GI_40254974-S | 126.7  | 144.9  | 106.6  | ITPKC     | <a href="#">NM_025194.2</a> |                                   |  | inositol- |                         |
| GI_40254975-S | 152.2  | 159.7  | 183.6  | SGPP1     | <a href="#">NM_030791.2</a> | SPPase1                           |  | hydrolase | integral to             |
| GI_40254976-S | 402.1  | 351    | 182.9  | C9orf45   | <a href="#">NM_030814.3</a> | GL012;FLJ22161                    |  |           |                         |
| GI_40254977-S | 640.6  | 632.6  | 548.8  | FIP1L1    | <a href="#">NM_030917.2</a> | Rhe;DKFZp586K0717                 |  |           |                         |
| GI_40254979-S | 381.4  | 326.5  | 284    | LAT1-3TM  | <a href="#">NM_031211.2</a> |                                   |  |           |                         |
| GI_40254981-S | 563.4  | 863.8  | 635.2  | C10orf45  | <a href="#">NM_031453.2</a> | FLJ45505;MGC11034                 |  |           |                         |
| GI_40254983-S | 145.8  | 169.1  | 135.1  | MLSTD2    | <a href="#">NM_032228.3</a> | FLJ22728                          |  |           |                         |
| GI_40254984-S | 196.7  | 178.8  | 176.8  | MGC10854  | <a href="#">NM_032300.2</a> |                                   |  |           |                         |
| GI_40254985-S | 630.4  | 624.8  | 551.9  | C9orf99   | <a href="#">NM_032303.2</a> | MGC10940                          |  | sterol    | metabolis               |
| GI_40254987-S | 1850.5 | 2371   | 2432.9 | MGC14151  | <a href="#">NM_032356.3</a> |                                   |  | pre-mRNA  | small mRNA              |
| GI_40254989-S | 351.5  | 294.2  | 346.7  | HH114     | <a href="#">NM_032499.3</a> | MGC11326                          |  |           |                         |
| GI_40254990-S | 100.9  | 105.8  | 101.4  | PAR6G     | <a href="#">NM_032510.2</a> | PAR-6G;PAR6gamma                  |  | protein   | tight intracellula      |
| GI_40254993-S | 79.9   | 90.5   | 80.2   | HSH2      | <a href="#">NM_032855.2</a> | ALX;FLJ14886                      |  |           | intracellula            |
| GI_40254994-S | 234.5  | 239.6  | 208    | SERAC1    | <a href="#">NM_032861.2</a> | FLJ14917                          |  | catalytic |                         |
| GI_40254998-S | 234.2  | 274.3  | 202.8  | MGC11386  | <a href="#">NM_032933.3</a> |                                   |  |           |                         |
| GI_40255000-S | 632    | 527.6  | 259.5  | LOC88523  | <a href="#">NM_033111.2</a> |                                   |  |           |                         |
| GI_40255002-S | 174.8  | 166.5  | 145.7  | MGC16733  | <a href="#">NM_033547.2</a> |                                   |  |           |                         |
| GI_40255004-S | 307.1  | 149.5  | 291.7  | PLXDC2    | <a href="#">NM_032812.7</a> | TEM7R;FLJ14623                    |  |           |                         |
| GI_40255006-S | 89.3   | 102.1  | 87.1   | MRGX2     | <a href="#">NM_054030.2</a> |                                   |  | receptor  | integral to G-protein   |
| GI_40255007-S | 183.4  | 221.8  | 196.2  | LRR15     | <a href="#">NM_130830.2</a> | LIB                               |  |           | integral to             |
| GI_40255010-S | 456.6  | 522    | 428.2  | SLC35E1   | <a href="#">NM_024881.3</a> | FLJ14251                          |  |           |                         |
| GI_40255011-S | 141.2  | 227.9  | 189.2  | KCTD12    | <a href="#">NM_138444.2</a> | C13orf2;KIAA1778                  |  | voltage-  | membran potassium       |
| GI_40255012-S | 69.9   | 74.4   | 67.2   | CEACAM6   | <a href="#">NM_002483.3</a> | NCA;CEAL;CD66c                    |  |           | integral to signal      |
| GI_40255014-S | 98     | 102    | 102.8  | PRTFDC1   | <a href="#">NM_020200.5</a> | HHGP                              |  | hypoxanth | cytoplasm purine        |
| GI_40255015-S | 468.9  | 481.1  | 414.3  | LOC92979  | <a href="#">NM_138396.3</a> |                                   |  |           |                         |
| GI_40255019-S | 1758.6 | 1356.5 | 1552   | FLJ11730  | <a href="#">NM_022756.3</a> | CDABP0189                         |  |           |                         |
| GI_40255021-S | 111.7  | 148.2  | 118.2  | UBL1      | <a href="#">NM_003352.3</a> | GMP1;PIC1;SMT3;SMT3C;SMT3H3;SUMO- |  | ubiquitin | nuclear small           |
| GI_40255022-S | 551.8  | 595    | 470    | FLJ21125  | <a href="#">NM_024627.4</a> |                                   |  |           |                         |
| GI_40255024-S | 522.7  | 409.5  | 478.2  | RIPK2     | <a href="#">NM_003821.4</a> | RICK;RIP2;CARD3;CARDIAC           |  | protein   | intracellula signal     |
| GI_40255027-S | 79.6   | 76.9   | 74.5   | TMG4      | <a href="#">NM_024081.4</a> |                                   |  | calcium   | extracellul biological_ |
| GI_40255028-S | 135.2  | 166.8  | 145.7  | LOC90693  | <a href="#">NM_138771.2</a> |                                   |  |           |                         |
| GI_40255030-S | 584.6  | 644.9  | 623.3  | FLJ12150  | <a href="#">NM_024736.4</a> |                                   |  |           |                         |
| GI_40255032-S | 560.3  | 587.4  | 469.8  | SP192     | <a href="#">NM_021639.3</a> |                                   |  |           |                         |
| GI_40255033-S | 253.5  | 191.1  | 173.3  | MIPOL1    | <a href="#">NM_138731.2</a> |                                   |  | tubulin-  | chaperoni               |
| GI_40255036-S | 182.8  | 197.3  | 183.5  | CAS1      | <a href="#">NM_022900.3</a> | C7ORF12;FLJ21213;FLJ21879         |  |           |                         |
| GI_40255038-S | 137.1  | 148.1  | 139.7  | FLJ10808  | <a href="#">NM_018227.3</a> |                                   |  | ubiquitin | ubiquitin               |
| GI_40255040-S | 1922.3 | 3165.1 | 2276.9 | TMP21     | <a href="#">NM_006827.4</a> | P24(DELTAA)                       |  | vesicle   | microsom ER to          |
| GI_40255042-S | 222.1  | 278.6  | 297    | GLB1L     | <a href="#">NM_024506.3</a> | MGC10771                          |  | beta-     | beta- carbohydr         |
| GI_40255044-S | 265.4  | 322.9  | 296.3  | C14orf103 | <a href="#">NM_018036.4</a> | FLJ10242                          |  |           |                         |
| GI_40255046-S | 284.8  | 320.6  | 312.6  | FLJ21019  | <a href="#">NM_024927.3</a> |                                   |  |           |                         |
| GI_40255048-S | 443.8  | 499.5  | 495.6  | C9orf55   | <a href="#">NM_017925.3</a> | FLJ20686                          |  |           |                         |
| GI_40255050-S | 266.9  | 293.8  | 364.8  | FLJ12770  | <a href="#">NM_032174.3</a> |                                   |  | voltage-  | mitochond anion         |



|               |        |        |        |           |                             |                             |             |              |
|---------------|--------|--------|--------|-----------|-----------------------------|-----------------------------|-------------|--------------|
| GI_40255051-S | 90.4   | 90.8   | 84.7   | FLJ22527  | <a href="#">NM_024726.3</a> |                             |             |              |
| GI_40255053-S | 625.8  | 427.1  | 268    | MGC11324  | <a href="#">NM_032717.3</a> | acyltransf                  | metabolis   |              |
| GI_40255056-S | 233.7  | 627.3  | 430.3  | MGC29643  | <a href="#">NM_144586.3</a> |                             |             |              |
| GI_40255059-S | 386.1  | 506.8  | 412.9  | FLJ32499  | <a href="#">NM_144607.2</a> | serine                      | extracellul | electron     |
| GI_40255061-S | 696.3  | 1009.5 | 950    | MGC32124  | <a href="#">NM_144611.2</a> |                             |             | electron     |
| GI_40255064-S | 131.1  | 103.4  | 101.3  | FLJ30294  | <a href="#">NM_144632.2</a> |                             |             |              |
| GI_40255066-S | 9704.3 | 10534  | 9130.6 | FLJ31952  | <a href="#">NM_144682.2</a> |                             |             |              |
| GI_40255068-S | 369.5  | 457.3  | 412.3  | FLJ32658  | <a href="#">NM_144688.2</a> |                             |             |              |
| GI_40255072-S | 140.9  | 127.1  | 111.2  | MGC34923  | <a href="#">NM_144717.2</a> | receptor                    |             |              |
| GI_40255074-S | 184.3  | 215    | 217.7  | LOC152185 | <a href="#">NM_144718.2</a> |                             |             |              |
| GI_40255077-S | 87.4   | 96.1   | 91.3   | FLJ25439  | <a href="#">NM_144725.2</a> |                             |             |              |
| GI_40255079-S | 103.1  | 556    | 90.8   | FLJ30058  | <a href="#">NM_144967.2</a> |                             |             |              |
| GI_40255081-S | 359.6  | 360.3  | 365.6  | LZIC      | <a href="#">NM_032368.3</a> | MGC15436                    |             |              |
| GI_40255082-S | 112.9  | 111.5  | 113.2  | ADMP      | <a href="#">NM_145035.2</a> |                             |             |              |
| GI_40255084-S | 218    | 261.1  | 227.4  | MGC20470  | <a href="#">NM_145053.2</a> |                             |             |              |
| GI_40255086-S | 106.7  | 115.5  | 95.5   | LOC118491 | <a href="#">NM_145170.2</a> |                             |             |              |
| GI_40255088-S | 212.7  | 264.3  | 237.4  | PP3856    | <a href="#">NM_145201.3</a> |                             |             |              |
| GI_40255090-S | 192.5  | 185    | 169.6  | C10orf78  | <a href="#">NM_145247.3</a> | ba373N18.1                  |             |              |
| GI_40255093-S | 311.6  | 327    | 319.1  | LOC159090 | <a href="#">NM_145284.3</a> |                             |             |              |
| GI_40255095-S | 103    | 110.4  | 107.8  | ZNF509    | <a href="#">NM_145291.2</a> |                             |             |              |
| GI_40255097-S | 108.1  | 118.1  | 113.6  | MUC15     | <a href="#">NM_145650.2</a> |                             |             |              |
| GI_40255100-S | 387.3  | 401.5  | 329.7  | SLC39A13  | <a href="#">NM_152264.2</a> | FLJ25785                    | heavy       | membran      |
| GI_40255102-S | 283.7  | 396.7  | 333.1  | ZNF488    | <a href="#">NM_153034.2</a> | FLJ32104                    | DNA         | nucleus      |
| GI_40255103-S | 320.7  | 367.4  | 318.8  | FLJ39369  | <a href="#">NM_152363.2</a> |                             |             | nuclear      |
| GI_40255105-S | 112    | 130.6  | 125    | FLJ35961  | <a href="#">NM_152372.2</a> |                             |             |              |
| GI_40255107-S | 415.3  | 404.7  | 303.5  | FLJ30596  | <a href="#">NM_153013.2</a> |                             |             |              |
| GI_40255108-S | 1338.3 | 970.4  | 849    | GRPEL2    | <a href="#">NM_152407.2</a> | FLJ23713;FLJ33918;Mt-       |             |              |
| GI_40255110-S | 225.7  | 266.7  | 261.6  | FLJ37562  | <a href="#">NM_152409.2</a> |                             | DNA         | nucleus      |
| GI_40255112-S | 164.5  | 192.7  | 170.4  | MGC35285  | <a href="#">NM_152428.2</a> |                             | protein     | regulation   |
| GI_40255114-S | 421.7  | 462.5  | 383.1  | FLJ31821  | <a href="#">NM_153029.2</a> |                             |             | intracellula |
| GI_40255116-S | 368.5  | 411.3  | 365.2  | FLJ31413  | <a href="#">NM_152557.2</a> |                             |             |              |
| GI_40255122-S | 111.5  | 142.4  | 123.6  | MGC33948  | <a href="#">NM_152587.2</a> |                             |             |              |
| GI_40255124-S | 126.7  | 159.4  | 138.1  | FLJ35382  | <a href="#">NM_152608.2</a> |                             |             |              |
| GI_40255126-S | 102.5  | 104.4  | 106.8  | FLJ35954  | <a href="#">NM_152622.2</a> |                             | DNA         | nucleus      |
| GI_40255128-S | 144.5  | 185    | 129.3  | MGC9712   | <a href="#">NM_152689.2</a> |                             |             |              |
| GI_40255132-S | 87.6   | 108    | 87.3   | FLJ23834  | <a href="#">NM_152750.2</a> |                             | calcium     | membran      |
| GI_40255134-S | 733.5  | 889.3  | 791.9  | FLJ31657  | <a href="#">NM_152758.2</a> |                             |             | homophili    |
| GI_40255136-S | 109.2  | 97.3   | 104.1  | MGC35140  | <a href="#">NM_152759.3</a> |                             |             |              |
| GI_40255138-S | 1349   | 1001.8 | 1027   | MGC25181  | <a href="#">NM_152783.2</a> |                             |             | electron     |
| GI_40255140-S | 311.5  | 1843.1 | 1358.6 | ChGn      | <a href="#">NM_018371.3</a> | FLJ11264;beta4GalNAcT       |             |              |
| GI_40255142-S | 153.5  | 172.2  | 148.9  | C6orf60   | <a href="#">NM_024581.3</a> | FLJ13942                    |             |              |
| GI_40255144-S | 186.5  | 232.7  | 213.2  | ZNF555    | <a href="#">NM_152791.3</a> | MGC26707                    | nucleic     | nucleus      |
| GI_40255146-S | 230.8  | 308.9  | 254    | GPR155    | <a href="#">NM_152529.3</a> | DEP.7;PGR22;DEPDC3;FLJ31819 | molecular   | integral to  |
| GI_40255148-S | 223.2  | 281.8  | 247.2  | ARHGEF19  | <a href="#">NM_153213.2</a> | FLJ33962                    |             | intracellula |

|               |        |        |        |            |                             |                       |             |             |             |
|---------------|--------|--------|--------|------------|-----------------------------|-----------------------|-------------|-------------|-------------|
| GI_40255150-S | 498.5  | 440.2  | 378.1  | ZNF550     | <a href="#">NM_153231.2</a> | MGC41917              | nucleic     | nucleus     | regulation  |
| GI_40255152-S | 533.5  | 777.9  | 547.7  | KCTD6      | <a href="#">NM_153331.2</a> | MGC27385              | voltage-    | membran     | potassium   |
| GI_40255154-S | 178    | 197.1  | 182.2  | FLJ35880   | <a href="#">NM_153264.2</a> |                       |             |             |             |
| GI_40255156-S | 481    | 1316.1 | 983.9  | FLJ90440   | <a href="#">NM_153377.3</a> |                       |             |             |             |
| GI_40255159-S | 374.4  | 685.7  | 788.2  | MGC20446   | <a href="#">NM_153611.2</a> |                       |             | integral to | electron    |
| GI_40255160-S | 140.2  | 171.7  | 149.4  | SLC29A3    | <a href="#">NM_018344.3</a> | ENT3;FLJ11160         | nucleoside  | membran     | transport   |
| GI_40255162-S | 363.7  | 438.3  | 375.4  | KIAA2024   | <a href="#">NM_172070.2</a> | FLJ37422;DKFZp434P117 |             |             |             |
| GI_40255164-S | 109.1  | 114.8  | 105.8  | LOC317671  | <a href="#">NM_173362.2</a> |                       | oxidoredu   |             | electron    |
| GI_40255165-S | 117.1  | 132.4  | 122.4  | FLJ34512   | <a href="#">NM_173476.2</a> |                       |             |             |             |
| GI_40255167-S | 100.1  | 92.6   | 83.8   | C20orf17   | <a href="#">NM_173485.2</a> | OVC10-2;FLJ33887      | transcripti | nucleus     | regulation  |
| GI_40255169-S | 160.8  | 201.8  | 170.3  | MGC42718   | <a href="#">NM_173506.3</a> |                       |             |             |             |
| GI_40255171-S | 251.1  | 281    | 260.4  | FLJ25692   | <a href="#">NM_173518.2</a> |                       |             |             |             |
| GI_40255173-S | 97     | 96.7   | 98.1   | C10orf64   | <a href="#">NM_173524.2</a> |                       |             |             |             |
| GI_40255175-S | 119.9  | 105.8  | 96.7   | MGC33382   | <a href="#">NM_173529.3</a> |                       |             |             |             |
| GI_40255177-S | 93.4   | 100.4  | 100.2  | TDRD5      | <a href="#">NM_173533.2</a> | FLJ34823              | nucleic     |             |             |
| GI_40255179-S | 86.8   | 95.4   | 94.4   | MGC34732   | <a href="#">NM_173556.2</a> |                       |             |             |             |
| GI_40255181-S | 355.4  | 386.8  | 442.7  | C6orf69    | <a href="#">NM_173562.3</a> | MGC14254;dJ108K11.3   | molecular   | cellular_co | biological_ |
| GI_40255183-S | 134.1  | 149.5  | 155.4  | FLJ32949   | <a href="#">NM_173812.3</a> |                       |             |             |             |
| GI_40255185-S | 277.3  | 308.6  | 285.3  | FLJ37464   | <a href="#">NM_173815.3</a> |                       | hydrolase   |             |             |
| GI_40255187-S | 191.6  | 192.7  | 183.3  | FLJ38288   | <a href="#">NM_173632.2</a> |                       |             |             |             |
| GI_40255189-S | 206.8  | 248.5  | 241.8  | C5orf16    | <a href="#">NM_173828.3</a> | FLJ90583              | DNA         | nucleus     | regulation  |
| GI_40255191-S | 127.8  | 128.4  | 131.4  | LOC138046  | <a href="#">NM_173848.3</a> |                       | nucleic     |             |             |
| GI_40255193-S | 146.9  | 173.6  | 168.9  | SLC41A1    | <a href="#">NM_173854.3</a> | MgtE                  | cation      |             | cation      |
| GI_40255195-S | 94.3   | 109.9  | 98.1   | NSE2       | <a href="#">NM_174911.3</a> | BCMP101               |             |             |             |
| GI_40255196-S | 136.4  | 147.8  | 129.3  | RASGEF1C   | <a href="#">NM_175062.2</a> |                       | guanyl-     |             | small       |
| GI_40255200-S | 101.1  | 102    | 105.5  | MGC35023   | <a href="#">NM_175877.3</a> |                       |             |             |             |
| GI_40255202-S | 93.8   | 104.6  | 101.7  | FLJ37266   | <a href="#">NM_175892.3</a> |                       |             |             |             |
| GI_40255204-S | 129.8  | 119.2  | 121.7  | LOC284296  | <a href="#">NM_175908.3</a> |                       |             |             |             |
| GI_40255206-S | 301.2  | 240.5  | 292.4  | TRA16      | <a href="#">NM_176880.3</a> |                       | receptor    |             |             |
| GI_40255207-S | 201.4  | 250.2  | 221.4  | KIAA1946   | <a href="#">NM_177454.2</a> |                       |             |             |             |
| GI_40255209-S | 561.5  | 958.4  | 410.2  | LOC130576  | <a href="#">NM_177964.3</a> |                       | receptor    | nucleus     | regulation  |
| GI_40255211-S | 185.5  | 247.5  | 239.2  | LRRTM4     | <a href="#">NM_024993.3</a> | FLJ12568              |             | integral to |             |
| GI_40255213-S | 140.8  | 149.4  | 145.2  | LOC147111  | <a href="#">NM_178493.3</a> |                       |             |             |             |
| GI_40255215-S | 88.6   | 86.3   | 86.9   | LRRTM3     | <a href="#">NM_178011.2</a> |                       |             | integral to |             |
| GI_40255217-S | 88.2   | 97.2   | 91.3   | MGC35555   | <a href="#">NM_178565.3</a> |                       |             |             |             |
| GI_40255219-S | 96.1   | 103    | 105.9  | LOC123872  | <a href="#">NM_178452.3</a> |                       |             |             |             |
| GI_40255222-S | 108.8  | 105.1  | 102.3  | FLJ40427   | <a href="#">NM_178504.3</a> |                       | microtubul  | dynein      | microtubul  |
| GI_40255224-S | 2020.6 | 1557.7 | 1069.9 | FLJ12892   | <a href="#">NM_022757.3</a> | DKFZp434L1050         | copper ion  |             | electron    |
| GI_40255226-S | 163    | 185.1  | 159.8  | C9orf79    | <a href="#">NM_178828.3</a> | FLJ35866              |             |             |             |
| GI_40255228-S | 196.7  | 270.5  | 225.4  | DKFZp564K1 | <a href="#">NM_032121.3</a> | PRO0756;FLJ14726      |             |             |             |
| GI_40255230-S | 146.2  | 152.9  | 131.6  | CUZD1      | <a href="#">NM_022034.3</a> | ERG-1;UO-44           |             | integral to |             |
| GI_40255231-S | 92.1   | 100.7  | 89.5   | ZNF493     | <a href="#">NM_175910.4</a> | FLJ36504              |             | nucleus     |             |
| GI_40255233-S | 111.2  | 134.5  | 126.7  | FLJ23033   | <a href="#">NM_024686.3</a> |                       | tubulin-    |             | protein     |
| GI_40255235-S | 609.9  | 552.9  | 583.9  | ZNF281     | <a href="#">NM_012482.3</a> | ZBP-99;ZNP-99         | specific    | DNA-        | negative    |

|               |        |        |        |              |                             |                            |             |              |             |
|---------------|--------|--------|--------|--------------|-----------------------------|----------------------------|-------------|--------------|-------------|
| GI_40255236-S | 261.7  | 263.6  | 251.8  | MTB          | <a href="#">NM_017760.4</a> | FLJ20311                   |             |              |             |
| GI_40255239-S | 869    | 1100.6 | 1235.2 | FLJ10276     | <a href="#">NM_018045.4</a> |                            |             |              |             |
| GI_40255241-S | 5297.7 | 5919.9 | 5124.3 | SOD1         | <a href="#">NM_000454.3</a> | ALS;ALS1;IPOA              | copper,     | cytoplasm    | response    |
| GI_40255242-S | 251.1  | 246.8  | 232.7  | RBM17        | <a href="#">NM_032905.3</a> | SPF45;MGC14439             | nucleic     | intracellula | mRNA        |
| GI_40255243-S | 1204   | 1683.5 | 1392.2 | KIAA0101     | <a href="#">NM_014736.3</a> | NS5ATP9                    |             |              |             |
| GI_40255244-S | 119    | 110.2  | 88     | GPR51        | <a href="#">NM_005458.5</a> | HG20;GABBR2;GPRC3B;GABABR2 | GABA-B      | kinesin      | negative    |
| GI_40255246-S | 527.8  | 452.6  | 591.3  | FLJ13119     | <a href="#">NM_024580.3</a> |                            | GTP         |              | translation |
| GI_40255248-S | 530.5  | 686.5  | 680    | FLJ14566     | <a href="#">NM_032806.4</a> |                            |             |              |             |
| GI_40255249-S | 274.7  | 347.8  | 286.5  | RTN4R        | <a href="#">NM_023004.4</a> | NGR;NOGOR                  | receptor    | membran      | axonogen    |
| GI_40255250-S | 1377.5 | 1098.4 | 1331.6 | MGC21688     | <a href="#">NM_144635.3</a> |                            |             |              |             |
| GI_40255252-S | 256.4  | 262.8  | 299.6  | FLJ12687     | <a href="#">NM_024917.4</a> |                            | S-          | mitochond    | transport   |
| GI_40255253-S | 689.6  | 848.7  | 780.9  | SCFD2        | <a href="#">NM_152540.3</a> | FLJ39514;STXBP1L1          | protein     |              | protein     |
| GI_40255256-S | 116.4  | 121.3  | 107    | LOC144347    | <a href="#">NM_181709.2</a> |                            |             |              |             |
| GI_40255258-S | 99.8   | 119.8  | 119.2  | TG1019       | <a href="#">NM_148962.3</a> | GPCR                       | receptor    | integral to  | G-protein   |
| GI_40255259-S | 278.2  | 538.4  | 445.9  | FLJ20701     | <a href="#">NM_017933.3</a> |                            |             |              |             |
| GI_40255261-S | 410.7  | 460.2  | 409.7  | SMAP-5       | <a href="#">NM_030799.5</a> | SB140;FLJ30014             |             |              |             |
| GI_40255262-S | 787.2  | 1215.2 | 971.9  | CGI-109      | <a href="#">NM_181836.3</a> |                            |             |              |             |
| GI_40255263-S | 182.7  | 224.9  | 201.1  | CBLN2        | <a href="#">NM_182511.2</a> |                            |             |              |             |
| GI_40255264-S | 85     | 83.3   | 71.7   | FLJ25161     | <a href="#">NM_182522.2</a> |                            |             |              |             |
| GI_40255265-S | 103.9  | 116.5  | 103.7  | FLJ33779     | <a href="#">NM_182572.2</a> |                            |             |              |             |
| GI_40255267-S | 697    | 795.2  | 859.6  | DKFZp686O1   | <a href="#">NM_182608.2</a> |                            |             |              |             |
| GI_40255269-S | 136.2  | 134.2  | 128.5  | C-P4H{alpha} | <a href="#">NM_182904.2</a> |                            | oxidoredu   |              | protein     |
| GI_40255270-S | 125.4  | 127.1  | 122.2  | PRKCB1       | <a href="#">NM_002738.4</a> | PKCB;PRKCB;PRKCB2          | protein     | cytoplasm    | protein     |
| GI_40255271-S | 359.6  | 437.8  | 374.4  | CMYA1        | <a href="#">NM_194293.2</a> | DKFZp451D042               |             |              |             |
| GI_40255273-S | 107.6  | 147.1  | 125.7  | LOC374946    | <a href="#">NM_198545.2</a> | UNQ3119                    |             |              |             |
| GI_40255275-S | 326.8  | 344.5  | 422    | T1           | <a href="#">NM_031466.3</a> | MGC4737;MGC4769;KIAA1882   |             |              |             |
| GI_40255277-S | 114.3  | 138.1  | 135.3  | RP1L1        | <a href="#">NM_178857.4</a> |                            |             |              |             |
| GI_40255279-S | 585.5  | 667.9  | 423.9  | LOC116228    | <a href="#">NM_198076.2</a> |                            |             |              |             |
| GI_40255282-S | 123.2  | 101.8  | 113.5  | NHLRC1       | <a href="#">NM_198586.2</a> | EPM2A;EPM2B;bA204B7.2      |             |              |             |
| GI_40255306-S | 241.4  | 319.4  | 280.7  | PDE7B        | <a href="#">NM_018945.2</a> |                            | cAMP-       |              | synaptic    |
| GI_40255309-S | 3931.2 | 2819.6 | 2958.9 | UBN1         | <a href="#">NM_016936.2</a> |                            | transcripti | nucleus      | regulation  |
| GI_40255312-S | 326.9  | 373.7  | 352.5  | P38IP        | <a href="#">NM_017569.2</a> | C13                        |             |              |             |
| GI_40255313-S | 90.8   | 85.5   | 95.2   | OBSCN        | <a href="#">NM_052843.1</a> | UNC89;KIAA1556             | ATP         |              | tRNA        |
| GI_40255315-S | 114.5  | 122.3  | 109.3  | SCN4A        | <a href="#">NM_000334.3</a> | HYPP;HYKPP;NAC1A;hNa(V)1.4 | voltage-    | voltage-     | sodium      |
| GI_40288186-A | 3776.8 | 3196.3 | 2428.1 | PDLIM2       | <a href="#">NM_198042.2</a> | FLJ34715                   |             |              |             |
| GI_40288186-I | 167    | 208.1  | 178.8  | PDLIM2       | <a href="#">NM_198042.2</a> | FLJ34715                   |             |              |             |
| GI_40288187-I | 126.8  | 121.4  | 123.2  | PDLIM2       | <a href="#">NM_176871.2</a> | FLJ34715                   |             |              |             |
| GI_40288188-I | 422.2  | 503.9  | 458.2  | PDLIM2       | <a href="#">NM_021630.4</a> | FLJ34715                   |             |              |             |
| GI_40288189-S | 175.4  | 188.1  | 161.9  | ITIH4        | <a href="#">NM_002218.3</a> | H4P;IHRP;PK120;ITIHL1      | endopepti   |              | acute-      |
| GI_40288190-S | 125.3  | 149.3  | 122.2  | HSXIAPAF1    | <a href="#">NM_017523.2</a> | XAF1                       | zinc ion    |              |             |
| GI_40288196-S | 463.1  | 988.2  | 799.7  | GATA6        | <a href="#">NM_005257.3</a> |                            | transcripti | nucleus      | muscle      |
| GI_40288200-S | 194.6  | 184.9  | 223.7  | FLJ33008     | <a href="#">NM_152449.2</a> |                            |             |              |             |
| GI_40288202-S | 100.9  | 101.6  | 89.7   | FLJ25477     | <a href="#">NM_152704.2</a> |                            |             |              |             |
| GI_40288273-S | 969.9  | 968.9  | 910.2  | NUDT1        | <a href="#">NM_002452.3</a> | MTH1                       | GTPase      |              | DNA         |

|               |        |        |        |            |                             |                                       |             |             |             |
|---------------|--------|--------|--------|------------|-----------------------------|---------------------------------------|-------------|-------------|-------------|
| GI_40288287-S | 5876.4 | 4670.1 | 5469.1 | CARM1      | <a href="#">NM_199141.1</a> | PRMT4                                 | methyltran  |             |             |
| GI_40288289-S | 112    | 440.3  | 272.3  | CLIC3      | <a href="#">NM_004669.2</a> |                                       | chloride    | membran     | small       |
| GI_40288292-S | 102.1  | 155.1  | 839.5  | THBD       | <a href="#">NM_000361.2</a> | TM;THRM;CD141                         | calcium     | integral to | blood       |
| GI_40316836-S | 129.7  | 157.8  | 146.8  | ATP8B2     | <a href="#">NM_020452.1</a> | ATPID;KIAA1137;DKFZp434M0219          | magnesi     | integral to | cation      |
| GI_40316838-S | 368.5  | 372.4  | 313.3  | ATP11C     | <a href="#">NM_173694.2</a> | ATPIG;ATPIQ;FLJ34233                  | magnesi     | integral to | cation      |
| GI_40316842-S | 130.6  | 132.7  | 121.6  | C21orf123  | <a href="#">NM_199175.1</a> | PRED80                                |             |             |             |
| GI_40316908-S | 108.7  | 117.2  | 112.6  | TBX22      | <a href="#">NM_016954.2</a> | CPX;TBXX;dJ795G23.1                   | transcripti | nucleus     | regulation  |
| GI_40316911-S | 160.4  | 207.9  | 134.2  | SAA1       | <a href="#">NM_000331.2</a> | SAA;PIG4;TP53I4                       | high-       |             | inflammat   |
| GI_40316913-I | 267.5  | 335.3  | 301.3  | PITX2      | <a href="#">NM_000325.4</a> | RS;RGS;ARP1;Brx1;IDG2;IGDS;IHG2;PTX2; | transcripti | nucleus     | determinat  |
| GI_40316914-S | 641.5  | 781    | 568.5  | RNPEP      | <a href="#">NM_020216.3</a> | DKFZP547H084                          | metallope   |             | proteolysis |
| GI_40316916-S | 115.2  | 131.5  | 116.1  | PCSK4      | <a href="#">NM_017573.2</a> | PC4;SPC5;MGC34749;DKFZp434B217        | subtilase   | extracellul | electron    |
| GI_40316917-S | 181.6  | 134.5  | 162.7  | MGC22960   | <a href="#">NM_199044.2</a> |                                       |             |             |             |
| GI_40316919-S | 225.4  | 304.2  | 236.1  | LOC223082  | <a href="#">NM_147128.3</a> | ZNRF2                                 |             |             |             |
| GI_40316920-S | 265.9  | 285.9  | 301.1  | HTPAP      | <a href="#">NM_032483.2</a> |                                       |             |             |             |
| GI_40316921-S | 328.8  | 466.2  | 522.3  | KBRAS2     | <a href="#">NM_017595.4</a> | DKFZP434N1526                         |             |             |             |
| GI_40316922-I | 107.5  | 135.1  | 103.5  | CXCL12     | <a href="#">NM_000609.3</a> | PBSF;SDF1;SDF1A;SDF1B;TPAR1;SCYB12;   | chemokin    | extracellul | regulation  |
| GI_40316923-I | 130.6  | 145.2  | 129    | CXCL12     | <a href="#">NM_199168.1</a> | PBSF;SDF1;SDF1A;SDF1B;TPAR1;SCYB12;   | chemokin    | extracellul | regulation  |
| GI_40316925-I | 86.7   | 91.6   | 93.8   | CLUL1      | <a href="#">NM_199167.1</a> | RA337M                                |             |             | cell death  |
| GI_40316927-S | 161.3  | 166.1  | 174.8  | CACNB3     | <a href="#">NM_000725.2</a> | CACNLB3                               | voltage-    | voltage-    | small       |
| GI_40316929-A | 85     | 88.5   | 86.1   | CLUL1      | <a href="#">NM_014410.4</a> | RA337M                                |             |             | cell death  |
| GI_40316934-S | 833.3  | 890.6  | 780.5  | ALS2       | <a href="#">NM_020919.2</a> | ALSJ;PLSJ;IAHSP;KIAA1563              | Rho         | early       | endosome    |
| GI_40316936-S | 332.9  | 410.6  | 380.7  | ALOX15     | <a href="#">NM_001140.3</a> |                                       | lipoxygena  | plasma      | lipid       |
| GI_40316940-S | 643    | 634.3  | 476.5  | AIG1       | <a href="#">NM_016108.2</a> | AIG-1;FLJ10485;dJ95L4.1               |             |             |             |
| GI_40316942-S | 593.1  | 439.7  | 421.8  | ALAS1      | <a href="#">NM_000688.4</a> | ALAS;ALASH                            | acyltransf  | mitochond   | heme        |
| GI_40316943-I | 237.7  | 295.7  | 261.8  | ADSSL1     | <a href="#">NM_199165.1</a> | FLJ38602                              | adenylosu   |             | purine      |
| GI_40316945-I | 235    | 294.8  | 253.3  | ADPRHL1    | <a href="#">NM_199162.1</a> | ARH2                                  | hydrolase   |             |             |
| GI_40316947-A | 102.2  | 111.8  | 105.6  | ADSSL1     | <a href="#">NM_152328.3</a> | FLJ38602                              | adenylosu   |             | purine      |
| GI_40316948-A | 115.3  | 124    | 123.8  | ADPRHL1    | <a href="#">NM_138430.3</a> | ARH2                                  | hydrolase   |             |             |
| GI_40316949-S | 198.2  | 248.6  | 215.1  | ABLIM2     | <a href="#">NM_032432.2</a> | KIAA1808                              |             |             |             |
| GI_40316951-S | 94.3   | 95.7   | 103.6  | ADAM32     | <a href="#">NM_145004.4</a> |                                       | metalloen   |             | integrin-   |
| GI_40317613-A | 1378.2 | 1146.4 | 1086.9 | MRRF       | <a href="#">NM_138777.2</a> | RRF;MRFF;MTRRF                        |             |             |             |
| GI_40317614-A | 2373.2 | 2754.9 | 4815.7 | TMEPAI     | <a href="#">NM_020182.3</a> | STAG1;PMEPA1                          | molecular   | integral to | androgen    |
| GI_40317619-I | 150.9  | 175.7  | 142.3  | TMEPAI     | <a href="#">NM_199171.1</a> | STAG1;PMEPA1                          | molecular   | integral to | androgen    |
| GI_40317621-I | 154.5  | 129.7  | 140    | MRRF       | <a href="#">NM_199176.1</a> | RRF;MRFF;MTRRF                        |             |             |             |
| GI_40317625-S | 1010.6 | 8760.1 | 2239   | THBS1      | <a href="#">NM_003246.2</a> | TSP;THBS;TSP1                         | endopepti   | extracellul | blood       |
| GI_40317627-S | 1492   | 2896.6 | 1512.8 | THBS2      | <a href="#">NM_003247.2</a> | TSP2                                  | heparin     | extracellul | cell        |
| GI_40317629-S | 282.1  | 390.3  | 277.2  | THBS3      | <a href="#">NM_007112.3</a> | TSP3                                  | heparin     | extracellul | cell-matrix |
| GI_40317630-S | 561.8  | 471.9  | 1177.9 | ZHX3       | <a href="#">NM_015035.2</a> | TIX1;KIAA0395                         | transcripti | nucleus     | regulation  |
| GI_40317631-S | 661.4  | 524.8  | 624.7  | NUDT4      | <a href="#">NM_019094.3</a> | DIPP2;HDCMB47P;KIAA0487;DIPP2beta;DI  | diphospho   |             | cyclic      |
| GI_40353201-S | 324.5  | 367.7  | 352.2  | DKFZp761A0 | <a href="#">NM_017602.2</a> |                                       |             |             |             |
| GI_40353202-S | 465.7  | 428.6  | 374.5  | C15orf17   | <a href="#">NM_020447.2</a> | FLJ00005                              |             |             |             |
| GI_40353203-I | 109.5  | 130.2  | 112.2  | SPTBN4     | <a href="#">NM_020971.1</a> | QV;SPTBN3;KIAA1642                    |             |             |             |
| GI_40353205-S | 239.4  | 221.5  | 231.1  | C6orf106   | <a href="#">NM_022758.3</a> | FLJ22195;dJ391O22.4                   |             |             |             |
| GI_40353206-S | 2784.5 | 1974.4 | 2176.5 | C20orf20   | <a href="#">NM_018270.3</a> | MRGBP;FLJ10914                        |             |             |             |

|               |         |        |        |           |                             |                                      |             |                         |
|---------------|---------|--------|--------|-----------|-----------------------------|--------------------------------------|-------------|-------------------------|
| GI_40353209-S | 803.8   | 905.3  | 980.4  | FLJ20308  | <a href="#">NM_017758.2</a> |                                      |             |                         |
| GI_40353211-S | 104.9   | 109.4  | 103.7  | C17orf1A  | <a href="#">NM_031456.2</a> | HREP;SM25H2;SM2SH2;C17ORF1           |             |                         |
| GI_40353238-S | 123     | 131    | 116.6  | TESSP5    | <a href="#">NM_199183.1</a> |                                      |             |                         |
| GI_40353240-S | 107.7   | 120    | 99.9   | FLJ46111  | <a href="#">NM_198473.1</a> |                                      |             |                         |
| GI_40353242-S | 352.1   | 428.7  | 412.6  | FLJ44670  | <a href="#">NM_199181.1</a> |                                      |             |                         |
| GI_40353726-S | 124.7   | 138.3  | 154.3  | SYNPO     | <a href="#">NM_007286.3</a> |                                      |             |                         |
| GI_40353730-S | 784.6   | 952    | 898.4  | PAN3      | <a href="#">NM_175854.4</a> |                                      |             |                         |
| GI_40353732-S | 17702.7 | 15447  | 11191  | NPM1      | <a href="#">NM_002520.4</a> | B23;NPM                              |             | nucleolus               |
| GI_40353737-S | 336.4   | 374    | 295.3  | LOC113251 | <a href="#">NM_052879.3</a> |                                      | nucleic     |                         |
| GI_40353741-I | 216.7   | 246.3  | 220.2  | KIRREL2   | <a href="#">NM_199180.1</a> | NLG1;NEPH3;MGC15718;DKFZP564A1164    |             |                         |
| GI_40353745-A | 95.5    | 93.8   | 99.8   | KIRREL2   | <a href="#">NM_032123.4</a> | NLG1;NEPH3;MGC15718;DKFZP564A1164    |             |                         |
| GI_40353747-I | 380.1   | 406    | 372.2  | GGTL4     | <a href="#">NM_199127.1</a> |                                      | gamma-      | cellular_co glutathion  |
| GI_40353749-S | 2149.1  | 2239.2 | 1961.4 | IMAA      | <a href="#">NM_199182.1</a> | MMAA                                 |             |                         |
| GI_40353751-A | 205.4   | 247.6  | 255.9  | GGTL4     | <a href="#">NM_080839.4</a> |                                      | gamma-      | cellular_co glutathion  |
| GI_40353752-S | 893.1   | 956.3  | 707.1  | FLJ25222  | <a href="#">NM_199163.2</a> |                                      |             |                         |
| GI_40353762-S | 616.1   | 709    | 725.7  | BRE       | <a href="#">NM_004899.3</a> |                                      |             | signal                  |
| GI_40353763-I | 140.7   | 163.3  | 151    | BPGM      | <a href="#">NM_199186.1</a> |                                      | bisphosph   | respiratory             |
| GI_40353765-S | 172.1   | 190.7  | 178.5  | BPNT1     | <a href="#">NM_006085.3</a> | PIP                                  | 3'(2'),5'-  | nucleobas               |
| GI_40353767-A | 177.6   | 215.2  | 209.4  | BPGM      | <a href="#">NM_001724.3</a> |                                      | bisphosph   | respiratory             |
| GI_40353768-S | 162.9   | 200.4  | 162.9  | BNF1      | <a href="#">NM_015424.3</a> | FKSG37;DKFZp586N2124                 |             |                         |
| GI_40353770-S | 2387    | 2199.1 | 1902.3 | BOP1      | <a href="#">NM_015201.3</a> | KIAA0124                             |             | nucleus                 |
| GI_40353771-S | 1400    | 1686.5 | 1787.1 | BLVRA     | <a href="#">NM_000712.3</a> | BLVR;BVRA                            | biliverdin  | electron                |
| GI_40353772-S | 1000.3  | 1209.2 | 1070.6 | BIA2      | <a href="#">NM_015431.2</a> | DKFZp434C091                         |             |                         |
| GI_40353774-S | 125.4   | 133.7  | 115.2  | BLNK      | <a href="#">NM_013314.2</a> | Ly57;SLP65;BLNK-s;SLP-65             | transmem    | cytoplasm hemocyte      |
| GI_40354191-S | 1592.6  | 1519.5 | 1144   | KRT10     | <a href="#">NM_000421.2</a> | K10;KPP                              | structural  | intermedia epidermal    |
| GI_40354193-A | 2681.2  | 4586.6 | 2437.8 | KRT18     | <a href="#">NM_000224.2</a> | K18;CYK18                            | structural  | intermedia embryoge     |
| GI_40354194-I | 262     | 326    | 241.7  | KRT18     | <a href="#">NM_199187.1</a> | K18;CYK18                            | structural  | intermedia embryoge     |
| GI_40354196-S | 2361.8  | 2597.1 | 1870.3 | THAP11    | <a href="#">NM_020457.2</a> | CTG-B43a;CTG-B45d;HRIHFB2206         | DNA         | nucleus                 |
| GI_40354198-S | 90.6    | 101.7  | 101.6  | TNFSF18   | <a href="#">NM_005092.2</a> | TL6;AITRL;GITRL;hGITRL               | receptor    | integral to anti-       |
| GI_40354199-S | 739     | 609.6  | 904.2  | TPX2      | <a href="#">NM_012112.4</a> | DIL2;P100;DIL-                       | GTP         | spindle mitosis         |
| GI_40354200-I | 114.1   | 118.9  | 103.5  | C6orf108  | <a href="#">NM_199184.1</a> | RCL;dJ330M21.3                       |             | nucleus cell            |
| GI_40354203-S | 97.7    | 104.3  | 91.9   | CCL3L1    | <a href="#">NM_021006.3</a> | LD78;464.2;SCYA3L;SCYA3L1;LD78BETA;M | cytokine    | extracellul response    |
| GI_40354204-S | 220.5   | 253.3  | 230.2  | ALDOB     | <a href="#">NM_000035.2</a> |                                      | fructose-   | cytoplasm fructose      |
| GI_40354206-S | 109.9   | 130    | 124.8  | KIAA1772  | <a href="#">NM_024935.2</a> | FLJ13687                             |             |                         |
| GI_40354208-S | 379.6   | 425.4  | 363.9  | IDUA      | <a href="#">NM_000203.2</a> | IDA;MPS1                             | L-          | lysosome disacchari     |
| GI_40354209-S | 92.4    | 100.7  | 77.7   | ORAOV2    | <a href="#">NM_018043.4</a> | TAOS2;TMEM16A;FLJ10261               |             |                         |
| GI_40354211-S | 136.3   | 117.9  | 109.1  | PIP3-E    | <a href="#">NM_015553.1</a> | IPCEF1;KIAA0403                      | peroxidas   | cytoplasm oxygen        |
| GI_40354213-S | 101.9   | 106.6  | 100.5  | RBP2      | <a href="#">NM_004164.2</a> | CRBP2;RBPC2;CRBP2II;CRABP-II         | retinoid    | vitamin A               |
| GI_40354215-S | 1043.9  | 1315.9 | 1373.6 | SIX5      | <a href="#">NM_175875.3</a> | DMAHP                                |             |                         |
| GI_40385863-S | 178.6   | 203.2  | 174.8  | KIF17     | <a href="#">NM_020816.1</a> | KIF3X;KIF17B;KIAA1405                | ATP         | microtubul intracellula |
| GI_40385866-S | 134.5   | 146.9  | 121    | MAP1D     | <a href="#">NM_199227.1</a> |                                      |             |                         |
| GI_40385872-S | 143.3   | 167.1  | 141.3  | LOC285601 | <a href="#">NM_199243.1</a> |                                      |             |                         |
| GI_40445386-S | 172.6   | 205    | 190    | FOXD4b    | <a href="#">NM_199244.1</a> |                                      | transcripti | nucleus regulation      |
| GI_40445400-S | 338.6   | 285.9  | 305.1  | C2orf22   | <a href="#">NM_152391.2</a> | MGC33602                             |             |                         |

|               |         |        |        |            |                             |                                     |             |                         |
|---------------|---------|--------|--------|------------|-----------------------------|-------------------------------------|-------------|-------------------------|
| GI_40538725-I | 112.6   | 131.3  | 119.3  | SPRY1      | <a href="#">NM_005841.1</a> | hSPRY1                              | membran     | histogene               |
| GI_40538727-S | 525.4   | 464.3  | 719.3  | PLEKHM1    | <a href="#">NM_014798.1</a> | B2;AP162;KIAA0356                   |             | intracellula            |
| GI_40538729-S | 684.9   | 654.2  | 611.7  | CAMSAP1    | <a href="#">NM_015447.1</a> | PRO2405;FLJ31228;DKFZP434F195;DKFZp |             |                         |
| GI_40538735-S | 252.4   | 316.1  | 309.8  | RANBP10    | <a href="#">NM_020850.1</a> | KIAA1464                            |             |                         |
| GI_40538737-S | 114.3   | 120    | 107.3  | ZNF273     | <a href="#">NM_021148.1</a> | HZF9                                | DNA         | nucleus regulation      |
| GI_40538771-S | 268.8   | 258.8  | 212.7  | LOC90826   | <a href="#">NM_138364.2</a> |                                     |             |                         |
| GI_40538773-S | 343.3   | 458.8  | 334.9  | WDR26      | <a href="#">NM_025160.3</a> | FLJ21016                            |             |                         |
| GI_40538783-S | 137.6   | 124.8  | 125.7  | IBRDC2     | <a href="#">NM_182757.1</a> | p53RFP;bA528A10.3                   | electron    | electron                |
| GI_40538787-S | 153     | 159    | 122.9  | NLGN4Y     | <a href="#">NM_014893.2</a> | KIAA0951                            | neuroligin  | membran cell            |
| GI_40538790-S | 118.1   | 111.1  | 99.7   | ICOSL      | <a href="#">NM_015259.2</a> | B7H2;GL50;B7-H2;B7RP1;LICOS;B7RP-   | defense/i   | integral to immune      |
| GI_40538791-S | 1516.2  | 1488.2 | 1255.2 | CGI-37     | <a href="#">NM_016101.2</a> | HSPC031                             |             |                         |
| GI_40538792-S | 268     | 299.4  | 282.4  | C6orf18    | <a href="#">NM_019052.2</a> | HCR;SBP                             |             |                         |
| GI_40538793-S | 252.5   | 309.2  | 312.5  | DKFZP434L0 | <a href="#">NM_022778.2</a> | FLJ13976;FLJ22000;DKFZp434P232      |             |                         |
| GI_40538795-S | 140.5   | 213    | 151.1  | FLJ10916   | <a href="#">NM_018271.2</a> |                                     |             |                         |
| GI_40538798-S | 154     | 178.1  | 169.4  | C1orf6     | <a href="#">NM_020131.3</a> | A1U;UBIN                            |             |                         |
| GI_40538800-S | 3268.9  | 3225.8 | 4192.1 | KIAA1913   | <a href="#">NM_052913.2</a> |                                     |             |                         |
| GI_40538801-S | 141.3   | 153.5  | 130.1  | MAMDC2     | <a href="#">NM_153267.3</a> | MGC21981                            |             | membran                 |
| GI_40538803-S | 475.5   | 564.7  | 515.2  | GPR97      | <a href="#">NM_170776.3</a> | Pb99;GPR-97                         | G-protein   | membran neuropepti      |
| GI_40538805-S | 126.6   | 148.1  | 121.3  | FLJ10213   | <a href="#">NM_018029.3</a> |                                     |             |                         |
| GI_40538807-S | 107.9   | 105.5  | 92.9   | COXVIB2    | <a href="#">NM_144613.3</a> | FLJ32865                            | DNA         | nucleus regulation      |
| GI_40538808-S | 903.8   | 926.1  | 1006.3 | C40        | <a href="#">NM_017546.3</a> |                                     | molecular   | cellular_co cell        |
| GI_40538810-S | 152.1   | 197.8  | 206.2  | C21orf4    | <a href="#">NM_006134.4</a> |                                     | molecular   | integral to biological_ |
| GI_40538879-S | 359.9   | 460.5  | 454.2  | AQP12      | <a href="#">NM_198998.1</a> |                                     |             |                         |
| GI_40548321-S | 480.6   | 392.8  | 503.2  | LOC201176  | <a href="#">NM_199282.1</a> | FLJ43547                            |             |                         |
| GI_40548323-S | 112.8   | 114.2  | 102.1  | LOC165186  | <a href="#">NM_199280.1</a> |                                     |             |                         |
| GI_40548325-S | 120.9   | 152.1  | 132.2  | LOC338759  | <a href="#">NM_199286.1</a> |                                     |             |                         |
| GI_40548365-S | 330.7   | 346.5  | 346.6  | ZNF322A    | <a href="#">NM_024639.2</a> | ZNF322;ZNF489;FLJ23393;bA457M11.3   |             |                         |
| GI_40548370-S | 120.3   | 127.2  | 98.8   | TIEG2      | <a href="#">NM_003597.4</a> | FKLF;FKLF1;KLF11                    | transcripti | nucleus negative        |
| GI_40548371-S | 714.5   | 748.2  | 707    | TTC15      | <a href="#">NM_016030.5</a> | CGI-87                              |             |                         |
| GI_40548373-A | 102.9   | 106.8  | 103.2  | TCL1B      | <a href="#">NM_004918.2</a> | TML1                                |             | oncogene                |
| GI_40548374-I | 106.9   | 113    | 121.3  | TCL1B      | <a href="#">NM_199206.1</a> | TML1                                |             | oncogene                |
| GI_40548376-S | 123.6   | 139.3  | 121.4  | Shax3      | <a href="#">NM_152284.2</a> | CHMP4C;MGC22825                     | molecular   |                         |
| GI_40548379-S | 2228.7  | 1897.7 | 2061.7 | RNASEH1    | <a href="#">NM_002936.3</a> | H1RNA                               | ribonuclea  | RNA                     |
| GI_40548380-S | 1267.8  | 1090.8 | 1142.6 | NAGLU      | <a href="#">NM_000263.2</a> | NAG;MPS3B                           | alpha-N-    | lysosome neurogene      |
| GI_40548381-I | 193.9   | 204.5  | 198.4  | MGC13170   | <a href="#">NM_199249.1</a> |                                     |             |                         |
| GI_40548385-S | 819.7   | 1043   | 782.7  | RAB8A      | <a href="#">NM_005370.4</a> | MEL;RAB8                            | GTP         | oncogene                |
| GI_40548386-S | 373.5   | 550.1  | 570.4  | LOC129642  | <a href="#">NM_138799.2</a> |                                     |             |                         |
| GI_40548388-I | 94.4    | 112.1  | 100.8  | DKK3       | <a href="#">NM_015881.4</a> | REIC                                |             | extracellul embryoge    |
| GI_40548390-S | 718     | 630.5  | 670.8  | TMEM18     | <a href="#">NM_152834.2</a> | DKFZp434C1714                       |             |                         |
| GI_40548392-A | 1556.3  | 1427.7 | 733.7  | DKK3       | <a href="#">NM_013253.3</a> | REIC                                |             | extracellul embryoge    |
| GI_40548392-I | 153.5   | 159.1  | 140.1  | DKK3       | <a href="#">NM_013253.3</a> | REIC                                |             | extracellul embryoge    |
| GI_40548396-I | 210     | 261.1  | 220.5  | DHRS9      | <a href="#">NM_199204.1</a> | RDHL;RETSR8;3alpha-HSD              |             |                         |
| GI_40548398-A | 11184.1 | 8866   | 12133  | DHRS2      | <a href="#">NM_005794.2</a> | HEP27                               | alcohol     | nucleus carbohydr       |
| GI_40548399-S | 239.9   | 321.6  | 299.9  | DHRS9      | <a href="#">NM_005771.3</a> | RDHL;RETSR8;3alpha-HSD              |             |                         |

|               |        |        |        |           |                             |                               |             |                           |
|---------------|--------|--------|--------|-----------|-----------------------------|-------------------------------|-------------|---------------------------|
| GI_40548400-S | 645.4  | 540.6  | 544.6  | DELGEF    | <a href="#">NM_012139.2</a> | Ran                           | cytoplasm   | signal                    |
| GI_40548401-I | 16567  | 15481  | 18845  | DHRS2     | <a href="#">NM_182908.3</a> | HEP27                         | alcohol     | nucleus<br>carbohydr      |
| GI_40548402-S | 603.7  | 557.8  | 466.5  | DCP1B     | <a href="#">NM_152640.3</a> | hDcp1b;FLJ31638               |             |                           |
| GI_40548404-S | 122    | 125.9  | 126.7  | DCAL1     | <a href="#">NM_172004.2</a> |                               |             | integral to               |
| GI_40548405-S | 2564.5 | 4071.3 | 2750.1 | DC2       | <a href="#">NM_021227.2</a> |                               |             |                           |
| GI_40548406-A | 513.6  | 591.4  | 602.5  | DBC-1     | <a href="#">NM_021174.4</a> | DBC1;KIAA1967                 |             |                           |
| GI_40548407-I | 155.9  | 190    | 160.7  | DBC-1     | <a href="#">NM_199205.1</a> | DBC1;KIAA1967                 |             |                           |
| GI_40548409-S | 5593.3 | 6562.5 | 4702.2 | DAP13     | <a href="#">NM_018838.3</a> |                               |             |                           |
| GI_40548412-I | 234.1  | 240.1  | 181.3  | D2LIC     | <a href="#">NM_016008.2</a> | LIC3;CGI-60;DKFZP564A033      |             |                           |
| GI_40548414-S | 407.3  | 764.8  | 154.2  | DAAM2     | <a href="#">NM_015345.2</a> | KIAA0381                      | actin       | cytokinesi                |
| GI_40548417-A | 296.7  | 361.4  | 267.8  | D2LIC     | <a href="#">NM_015522.2</a> | LIC3;CGI-60;DKFZP564A033      |             |                           |
| GI_40548417-I | 103.8  | 97.1   | 97.2   | D2LIC     | <a href="#">NM_015522.2</a> | LIC3;CGI-60;DKFZP564A033      |             |                           |
| GI_40548418-A | 210.1  | 143.6  | 176.2  | COLEC11   | <a href="#">NM_024027.3</a> | MGC3279                       | sugar       | nucleus<br>regulation     |
| GI_40548419-I | 104.5  | 102.9  | 106.1  | COLEC11   | <a href="#">NM_199235.1</a> | MGC3279                       | sugar       | nucleus<br>regulation     |
| GI_40548421-S | 583.8  | 584.6  | 477.6  | C14orf123 | <a href="#">NM_014169.2</a> | Shax2;CHMP4A;CHMP4B;HSPC134   | molecular   |                           |
| GI_40548424-I | 115.7  | 102.5  | 106.4  | ALLC      | <a href="#">NM_199232.1</a> | ALC                           |             |                           |
| GI_40549393-S | 129.1  | 152.8  | 138.7  | ADPRH     | <a href="#">NM_001125.2</a> | ARH1                          | ADPribosy   | protein                   |
| GI_40549398-S | 1670.2 | 1731.5 | 2705.5 | C20orf178 | <a href="#">NM_176812.3</a> | Shax1;CHMP4A;CHMP4B;dJ553F4.4 | molecular   |                           |
| GI_40549399-A | 4358.7 | 4143.1 | 2605.1 | CSNK1E    | <a href="#">NM_001894.4</a> | HCKIE;MGC10398                | casein      | protein                   |
| GI_40549399-I | 148.2  | 173.4  | 177.2  | CSNK1E    | <a href="#">NM_001894.4</a> | HCKIE;MGC10398                | casein      | protein                   |
| GI_40549401-A | 82.7   | 87.5   | 83.2   | GDNF      | <a href="#">NM_000514.2</a> | ATF1;ATF2                     | receptor    | nucleus<br>anti-          |
| GI_40549410-I | 112.2  | 117.9  | 102.9  | GDNF      | <a href="#">NM_199231.1</a> | ATF1;ATF2                     | receptor    | nucleus<br>anti-          |
| GI_40549416-S | 233.3  | 309.2  | 275.8  | LHX6      | <a href="#">NM_014368.2</a> | LHX6.1                        | transcripti | nucleus<br>brain          |
| GI_40549417-S | 131.7  | 141.5  | 127.7  | LPO       | <a href="#">NM_006151.1</a> | SPO                           | peroxidase  | soluble<br>peroxidase     |
| GI_40549419-S | 120.9  | 124.1  | 127.9  | THBS4     | <a href="#">NM_003248.3</a> | TSP4                          | heparin     | extracellul<br>substrate- |
| GI_40549420-S | 199.5  | 239.5  | 198.4  | THEG      | <a href="#">NM_016585.3</a> | MGC26138                      |             | protein                   |
| GI_40549423-S | 660.5  | 769.5  | 645.6  | THEM2     | <a href="#">NM_018473.2</a> | HT012;MGC4961;PNAS-27         | catalytic   |                           |
| GI_40549424-I | 116.9  | 114    | 114.9  | TPIP      | <a href="#">NM_199254.1</a> |                               |             |                           |
| GI_40549426-I | 101.2  | 95.3   | 97.3   | TPIP      | <a href="#">NM_199255.1</a> |                               |             |                           |
| GI_40549430-S | 296.9  | 284.4  | 295.5  | TPTE      | <a href="#">NM_013315.2</a> | PTEN2                         | protein     | integral to<br>signal     |
| GI_40549443-I | 129.6  | 159.6  | 137.8  | VAMP1     | <a href="#">NM_016830.2</a> | SYB1;VAMP-1                   |             | synaptic<br>nonselecti    |
| GI_40549445-I | 127    | 154.4  | 132.5  | VAMP1     | <a href="#">NM_199245.1</a> | SYB1;VAMP-1                   |             | synaptic<br>nonselecti    |
| GI_40549447-S | 105.4  | 101.6  | 93     | VAV2      | <a href="#">NM_003371.2</a> |                               | guanyl-     | signal                    |
| GI_40549449-S | 126    | 138.8  | 122.2  | XEDAR     | <a href="#">NM_021783.2</a> | EDAA2R;EDA-A2R                | tumor       | integral to<br>epidermal  |
| GI_40549450-S | 85.2   | 101.3  | 98.2   | XLKD1     | <a href="#">NM_006691.2</a> | HAR;LYVE1;LYVE-1              | receptor    | membran<br>response       |
| GI_40549452-S | 199.1  | 192.6  | 208.3  | ZBTB7     | <a href="#">NM_015898.2</a> | LRF;FBI1;FBI-1                | protein     | nucleus<br>regulation     |
| GI_40549453-S | 127.5  | 155    | 138.7  | HTLF      | <a href="#">NM_002158.2</a> | FOXN2                         | transcripti | nucleus<br>invasive       |
| GI_40549455-S | 732.7  | 694    | 513.2  | NHS       | <a href="#">NM_198270.2</a> |                               |             |                           |
| GI_40549456-A | 96.5   | 99.9   | 102.9  | SYT15     | <a href="#">NM_031912.3</a> | sytXV;CHR10SYT                | transporte  | integral to<br>transport  |
| GI_40549457-I | 489.5  | 485.3  | 430.1  | SYT15     | <a href="#">NM_181519.2</a> | sytXV;CHR10SYT                | transporte  | integral to<br>transport  |
| GI_40549458-S | 119.5  | 145.9  | 134.3  | YPEL1     | <a href="#">NM_013313.3</a> | FKSG3                         |             | nucleus                   |
| GI_40556268-S | 92.8   | 99.2   | 92.2   | C19orf15  | <a href="#">NM_021185.3</a> | FLJ46353;DKFZP434A1022        |             |                           |
| GI_40556270-S | 430    | 376    | 361.7  | LOC134492 | <a href="#">NM_145266.4</a> |                               |             |                           |
| GI_40556360-S | 102.1  | 103.1  | 99.4   | LOC56964  | <a href="#">NM_020212.1</a> |                               |             |                           |

|               |        |        |        |            |                             |                                    |                   |                        |
|---------------|--------|--------|--------|------------|-----------------------------|------------------------------------|-------------------|------------------------|
| GI_40556362-S | 1060.6 | 752.3  | 693.7  | NT5C3      | <a href="#">NM_016489.1</a> | PN-I;PSN1;UMPH;UMPH1;P5'N-1;cN-III | transcripti       | regulation             |
| GI_40556369-S | 106.5  | 103.4  | 96.2   | PHF15      | <a href="#">NM_015288.4</a> | JADE2;KIAA0239                     | DNA               | regulation             |
| GI_40556371-S | 116.6  | 120.3  | 123.4  | ANKRD12    | <a href="#">NM_015208.2</a> | GAC-1;FLJ20053;KIAA0874            |                   |                        |
| GI_40556373-S | 127.8  | 151.7  | 122.1  | SARG       | <a href="#">NM_023938.3</a> | MGC2742;MGC4309                    |                   |                        |
| GI_40556374-S | 5075.7 | 5085.3 | 2275   | AMIGO2     | <a href="#">NM_181847.2</a> | ALI1;DEGA                          |                   | integral to            |
| GI_40556375-S | 111.4  | 115    | 116.9  | N-PAC      | <a href="#">NM_032569.2</a> | BM045;HIBDL                        | DNA               | nucleus pentose-       |
| GI_40556377-S | 422.7  | 438.4  | 372.2  | FLJ25070   | <a href="#">NM_017619.2</a> | FLJ20008;KIAA1839                  | nucleic           |                        |
| GI_40556387-S | 167.8  | 254.5  | 120.7  | SCNN1A     | <a href="#">NM_001038.3</a> | ENaCa;SCNEA;SCNN1;ENaCalpha        | amiloride-        | membran sodium         |
| GI_40556388-I | 97.3   | 106.3  | 107.5  | ZBPB2      | <a href="#">NM_199321.1</a> | ZPBPL;MGC41930                     |                   |                        |
| GI_40556392-I | 246    | 206.3  | 186    | JADE1      | <a href="#">NM_199320.1</a> | FLJ22479;KIAA1807                  | DNA               | regulation             |
| GI_40786390-S | 4003.9 | 2804.7 | 2611.1 | DNAJA3     | <a href="#">NM_005147.3</a> | TID1;hTid-1                        | chaperone membran | cell growth            |
| GI_40786393-S | 189.6  | 165.9  | 147.8  | DKFZp434N0 | <a href="#">NM_199336.1</a> |                                    | catalytic         | metabolis              |
| GI_40786395-S | 90.3   | 90.7   | 92.6   | FLJ35171   | <a href="#">NM_199338.1</a> |                                    |                   |                        |
| GI_40786399-S | 104.9  | 109.9  | 93.8   | FLJ34306   | <a href="#">NM_199340.1</a> |                                    |                   |                        |
| GI_40786401-S | 2301.4 | 2219.9 | 1906.1 | LOC374395  | <a href="#">NM_199337.1</a> |                                    |                   |                        |
| GI_40786403-S | 699.8  | 793.3  | 668.8  | LOC374969  | <a href="#">NM_199342.1</a> |                                    |                   |                        |
| GI_40786405-S | 110    | 116.7  | 109.5  | LOC374768  | <a href="#">NM_199339.1</a> |                                    |                   |                        |
| GI_40786407-S | 149.7  | 179.2  | 160    | LOC375035  | <a href="#">NM_199344.1</a> | UNQ512;dJ747L4.C1.2                |                   |                        |
| GI_40786409-S | 153.8  | 143.3  | 130.3  | LOC374920  | <a href="#">NM_199341.1</a> | MGC50339                           |                   |                        |
| GI_40786413-S | 176.2  | 230.4  | 193.7  | FLJ90637   | <a href="#">NM_199343.1</a> |                                    |                   |                        |
| GI_40786415-S | 108.3  | 113.9  | 106.7  | LOC375616  | <a href="#">NM_199349.1</a> |                                    |                   |                        |
| GI_40786417-S | 119.3  | 133.8  | 119.2  | PFN4       | <a href="#">NM_199346.1</a> |                                    |                   |                        |
| GI_40786419-S | 386    | 507.3  | 452.9  | C1orf32    | <a href="#">NM_199351.1</a> |                                    |                   |                        |
| GI_40786421-S | 104.3  | 114.4  | 110.4  | LOC375418  | <a href="#">NM_199348.1</a> |                                    |                   |                        |
| GI_40786425-S | 136    | 133.6  | 138.2  | LOC375759  | <a href="#">NM_199350.1</a> | FLJ35803                           |                   |                        |
| GI_40786429-S | 135.1  | 151.4  | 139.4  | LOC387601  | <a href="#">NM_199352.1</a> |                                    |                   |                        |
| GI_40786533-S | 248.5  | 362.5  | 310    | LOC375133  | <a href="#">NM_199345.1</a> |                                    |                   |                        |
| GI_40786537-S | 158.5  | 185.2  | 176.9  | FOXD4L3    | <a href="#">NM_199358.1</a> |                                    |                   |                        |
| GI_40786545-S | 113.4  | 118.9  | 107.4  | TH         | <a href="#">NM_000360.2</a> | TYH                                | tyrosine 3-       | catechola              |
| GI_40786546-S | 2787.4 | 1922   | 2123.3 | ANKRD11    | <a href="#">NM_013275.3</a> | T13;LZ16                           |                   |                        |
| GI_40787998-S | 756.4  | 1024.7 | 873.5  | SSBP2      | <a href="#">NM_012446.2</a> | HSPC116                            | DNA               | nucleus regulation     |
| GI_40788000-I | 132.7  | 148.1  | 129.6  | SPRY1      | <a href="#">NM_199327.1</a> | hSPRY1                             |                   | membran histogene      |
| GI_40788002-S | 1624.5 | 2218.9 | 1960.4 | PSME4      | <a href="#">NM_014614.1</a> | PA200;KIAA0077                     |                   |                        |
| GI_40788008-S | 6676.6 | 3431.6 | 1748.7 | SLC43A3    | <a href="#">NM_017611.2</a> | EEG1;FOAP-13;PRO1659;SEEEG-        |                   |                        |
| GI_40788009-S | 2426.1 | 1481   | 1880   | DAF        | <a href="#">NM_000574.2</a> | CR;TC;CD55                         |                   | soluble                |
| GI_40788010-I | 82.8   | 77.3   | 74.3   | CLDN8      | <a href="#">NM_199328.1</a> |                                    | structural        | tight                  |
| GI_40788012-S | 186.7  | 194.9  | 199.1  | CTF1       | <a href="#">NM_001330.2</a> | CT1;CT-1                           | leukemia          | extracellul positive   |
| GI_40788013-A | 116.9  | 129.2  | 117.4  | CLDN8      | <a href="#">NM_012132.3</a> |                                    | structural        | tight                  |
| GI_40788014-S | 131.3  | 126.6  | 125.1  | CARD12     | <a href="#">NM_021209.3</a> | CLAN;IPAF;CLAN1;CLANA;CLANB;CLANC; | ATP               | intracellula apoptosis |
| GI_40788016-S | 917.4  | 1252.5 | 1245.8 | C8FW       | <a href="#">NM_025195.2</a> | GIG2;SKIP1                         | protein           | cytoplasm cell         |
| GI_40788017-I | 88.9   | 95.9   | 84.7   | ARHGAP11A  | <a href="#">NM_199357.1</a> | KIAA0013;MGC70740                  |                   |                        |
| GI_40788019-S | 496.6  | 337.8  | 359.3  | C1orf21    | <a href="#">NM_030806.2</a> |                                    |                   |                        |
| GI_40788020-I | 128.5  | 124.3  | 107.6  | ARHGAP11A  | <a href="#">NM_014783.2</a> | KIAA0013;MGC70740                  |                   |                        |
| GI_40789088-S | 3668.2 | 3585   | 2842.3 | NTAN1      | <a href="#">NM_173474.2</a> |                                    | hydrolase         |                        |



|               |        |        |        |            |                             |                                                 |            |              |              |
|---------------|--------|--------|--------|------------|-----------------------------|-------------------------------------------------|------------|--------------|--------------|
| GI_40789101-S | 223.9  | 274.6  | 257.2  | LOC220686  | <a href="#">NM_199283.2</a> |                                                 |            |              |              |
| GI_40789228-S | 251.6  | 347.1  | 325.5  | SFRS15     | <a href="#">NM_020706.1</a> | SRA4;KIAA1172;DKFZP434E098                      | RNA        |              |              |
| GI_40789232-S | 1901.2 | 1816.8 | 1787.8 | DKFZP434K0 | <a href="#">NM_020312.1</a> |                                                 |            |              |              |
| GI_40789255-S | 1512.8 | 1564.6 | 1056.5 | SRP72      | <a href="#">NM_006947.2</a> |                                                 |            | signal       |              |
| GI_40789258-S | 202.6  | 224.4  | 230.4  | TDRD4      | <a href="#">NM_019038.2</a> | FLJ11045                                        | nucleic    |              |              |
| GI_40789260-S | 101.1  | 100.7  | 85.1   | SLC16A6    | <a href="#">NM_004694.2</a> | MCT6                                            | monocarb   | membran      | monocarb     |
| GI_40789262-S | 104.7  | 99.5   | 109.9  | TMOD2      | <a href="#">NM_014548.2</a> | NTMOD                                           | tropomyos  | F-actin      | cell shape   |
| GI_40789263-S | 3140.3 | 3023.6 | 2765.8 | MGC11257   | <a href="#">NM_032350.3</a> |                                                 |            |              |              |
| GI_40789264-S | 92.4   | 128    | 105    | FLJ25045   | <a href="#">NM_178537.3</a> |                                                 | DNA        | nucleus      | regulation   |
| GI_40789266-S | 117.8  | 119.9  | 114.2  | FLJ12684   | <a href="#">NM_024534.2</a> |                                                 |            |              |              |
| GI_40789269-S | 253    | 205.1  | 172.7  | ZNF573     | <a href="#">NM_152360.2</a> | FLJ30921                                        |            | nucleus      |              |
| GI_40789305-I | 103.8  | 118.9  | 106.1  | ZNF365     | <a href="#">NM_199451.1</a> | KIAA0844                                        |            |              |              |
| GI_40789307-I | 163.3  | 176.1  | 143.2  | ZNF365     | <a href="#">NM_199452.1</a> | KIAA0844                                        |            |              |              |
| GI_40789309-I | 115    | 123.1  | 126.2  | ZNF365     | <a href="#">NM_199450.1</a> | KIAA0844                                        |            |              |              |
| GI_40795664-S | 396.4  | 482.3  | 511.1  | USP4       | <a href="#">NM_003363.2</a> | UNP                                             | lysosomal  | cytoplasm    | deubiquiti   |
| GI_40795668-S | 128.4  | 145.9  | 133.3  | SLC38A3    | <a href="#">NM_006841.3</a> | G17;SN1                                         | amino      | integral to  | acidic       |
| GI_40795669-S | 2789.6 | 3058   | 3118.9 | PL6        | <a href="#">NM_007024.4</a> |                                                 | guanyl-    | integral to  | signal       |
| GI_40795670-S | 408.3  | 344.7  | 334.4  | FLJ37970   | <a href="#">NM_032251.3</a> | BRLZ;FLJ00354;DKFZp434G0920                     |            |              |              |
| GI_40795672-S | 101.8  | 112.6  | 99.1   | FLJ25530   | <a href="#">NM_152722.3</a> | HEPN1                                           | DNA        | nucleus      | regulation   |
| GI_40804463-S | 107.6  | 113.6  | 115.2  | C20orf103  | <a href="#">NM_012261.2</a> |                                                 |            | integral to  |              |
| GI_40804464-S | 192.7  | 207.2  | 176.4  | C20orf104  | <a href="#">NM_016436.3</a> | NZF;TZP;GLEA2;HCA58                             | DNA        | nucleus      | regulation   |
| GI_40804465-S | 89.4   | 80.2   | 89.2   | C20orf10   | <a href="#">NM_014477.2</a> | CLG01;TP53TG5                                   | molecular  | perinuclea   | intracellula |
| GI_40804466-S | 928.6  | 948.1  | 1285.7 | C20orf11   | <a href="#">NM_017896.2</a> | TWA1                                            |            | kinesin      |              |
| GI_40804467-I | 178.4  | 224.1  | 204.2  | CACNB1     | <a href="#">NM_000723.3</a> | CAB1;CCHLB1;CACNLB1;MGC41896                    | voltage-   | voltage-     | small        |
| GI_40804469-I | 152.4  | 170.6  | 160.2  | CACNB1     | <a href="#">NM_199247.1</a> | CAB1;CCHLB1;CACNLB1;MGC41896                    | voltage-   | voltage-     | small        |
| GI_40804741-S | 1211   | 1222.7 | 1311.6 | FLJ11806   | <a href="#">NM_024824.2</a> | NY-REN-37                                       |            |              |              |
| GI_40804743-S | 341    | 438.7  | 401.7  | SEMA4C     | <a href="#">NM_017789.3</a> | SEMAI;Semaf;Semacl1;FLJ20369;KIAA1739; receptor |            | membran      | developm     |
| GI_40804747-S | 160.6  | 145.7  | 115.4  | LIMS2      | <a href="#">NM_017980.2</a> | PINCH-2;FLJ10044                                |            |              |              |
| GI_40804749-S | 172    | 175.5  | 193    | PAXIP1L    | <a href="#">NM_007349.2</a> | PTIP;TNRC2;CAGF28;CAGF29                        |            | intracellula |              |
| GI_40804753-S | 170.8  | 155.9  | 140.9  | RTN2       | <a href="#">NM_005619.2</a> | NSP2;NSPL1                                      | molecular  | endoplas     | signal       |
| GI_40804754-S | 117.1  | 131.8  | 126    | LOC283439  | <a href="#">NM_199460.1</a> |                                                 |            |              |              |
| GI_40804758-S | 123.4  | 131.4  | 135.9  | C10orf71   | <a href="#">NM_199459.1</a> | FLJ45913                                        | transporte | membran      | transport    |
| GI_40804760-S | 167.9  | 191.9  | 184.9  | NANOS1     | <a href="#">NM_199461.1</a> |                                                 |            |              |              |
| GI_40804767-S | 222.5  | 250.5  | 243.6  | EFO1       | <a href="#">NM_052911.1</a> | KIAA1911                                        |            |              |              |
| GI_40804769-I | 132.8  | 143    | 130    | TEPP       | <a href="#">NM_199046.1</a> |                                                 |            |              |              |
| GI_40805101-S | 129.9  | 120.3  | 102.5  | ZFP276     | <a href="#">NM_152287.2</a> | ZNF477;MGC45417                                 |            |              |              |
| GI_40805103-S | 285.4  | 336.2  | 372.7  | TOPORS     | <a href="#">NM_005802.2</a> | LUN;TP53BPL                                     | DNA        | nucleus      | regulation   |
| GI_40805105-S | 123.8  | 143.5  | 134.2  | FUT10      | <a href="#">NM_032664.3</a> | MGC11141                                        |            |              |              |
| GI_40805107-S | 476.9  | 665.2  | 599.2  | NID67      | <a href="#">NM_032947.3</a> |                                                 |            |              |              |
| GI_40805821-S | 2310.3 | 3368   | 3022.6 | COPE       | <a href="#">NM_007263.3</a> | FLJ13241;epsilon-COP                            | protein    | membran      | nonselecti   |
| GI_40805822-S | 156.4  | 135.2  | 750.2  | COL22A1    | <a href="#">NM_152888.1</a> |                                                 | structural | microfibril  | cell         |
| GI_40805828-A | 3111.2 | 3283.5 | 3527.7 | COPS8      | <a href="#">NM_006710.4</a> | COP9;CSN8;SGN8;MGC1297                          |            | nucleus      |              |
| GI_40805829-I | 115    | 115.5  | 104.6  | COPS8      | <a href="#">NM_198189.2</a> | COP9;CSN8;SGN8;MGC1297                          |            | nucleus      |              |
| GI_40805830-S | 834.7  | 1071.9 | 805    | CCNG1      | <a href="#">NM_004060.3</a> | CCNG                                            | cyclin-    | nucleus      | regulation   |

|               |        |        |        |          |                             |                                    |            |             |             |
|---------------|--------|--------|--------|----------|-----------------------------|------------------------------------|------------|-------------|-------------|
| GI_40805833-S | 306.2  | 290.1  | 223.3  | CCRL2    | <a href="#">NM_003965.3</a> | HCR;CKRX;CRAM-A;CRAM-B             | chemokine  | integral to | chemotaxi   |
| GI_40805834-S | 1436.6 | 1474.6 | 1271.6 | CNO      | <a href="#">NM_018366.2</a> | FLJ11230                           |            |             |             |
| GI_40805835-S | 118.6  | 138    | 109.5  | CYP2D6   | <a href="#">NM_000106.3</a> | CPD6;CYP2D;CYP2D@;CYP2DL1;P450C2D  | cytochrom  |             |             |
| GI_40805838-S | 150.1  | 177.9  | 150.8  | PRAC     | <a href="#">NM_032391.2</a> | MGC32520                           |            | nucleus     |             |
| GI_40805839-A | 1397.1 | 1718.7 | 1497.8 | PRCP     | <a href="#">NM_005040.2</a> | PCP;HUMPCP;MGC2202                 | serine     | lysosome    | proteolysis |
| GI_40805840-I | 112.7  | 118.6  | 106.8  | PRCP     | <a href="#">NM_199418.1</a> | PCP;HUMPCP;MGC2202                 | serine     | lysosome    | proteolysis |
| GI_40805842-S | 159.2  | 161.7  | 154.3  | PCAF     | <a href="#">NM_003884.3</a> | CAF;P/CAF                          | histone    | nucleus     | protein     |
| GI_40805844-S | 453.9  | 386.4  | 437    | POLQ     | <a href="#">NM_006596.3</a> | POLH;PRO0327                       | DNA-       | nucleoplas  | DNA         |
| GI_40805848-A | 134.4  | 149.8  | 153.2  | PTPRE    | <a href="#">NM_130435.2</a> | PTPE;HPTPE;R-PTP-EPSILON           | transmem   | soluble     | protein     |
| GI_40805848-I | 101.7  | 98.9   | 89.4   | PTPRE    | <a href="#">NM_130435.2</a> | PTPE;HPTPE;R-PTP-EPSILON           | transmem   | soluble     | protein     |
| GI_40805849-I | 143.9  | 178.1  | 171.6  | PTPRE    | <a href="#">NM_006504.3</a> | PTPE;HPTPE;R-PTP-EPSILON           | transmem   | soluble     | protein     |
| GI_40805850-S | 653.2  | 578.2  | 360.8  | THSD1    | <a href="#">NM_018676.2</a> | TMTSP;UNQ3010;MGC74971             | defense/i  | cell        |             |
| GI_40805853-S | 125.5  | 133.5  | 115.6  | THSD3    | <a href="#">NM_182509.2</a> |                                    | molecular  | extrachro   |             |
| GI_40805855-I | 82.6   | 90.7   | 85.4   | THSD3    | <a href="#">NM_199265.1</a> |                                    | molecular  | extrachro   |             |
| GI_40805859-S | 3636   | 3086.7 | 4986.8 | TPD52L2  | <a href="#">NM_003288.2</a> | D54;hD54                           |            | kinesin     | cell        |
| GI_40805871-S | 348.2  | 443    | 363.1  | THPO     | <a href="#">NM_000460.2</a> | ML;TPO;MGDF;MKCSF;MPLLG            | growth     | extracellul | developm    |
| GI_40806158-I | 658.8  | 798.5  | 659.3  | THRA     | <a href="#">NM_003250.4</a> | AR7;EAR7;ERBA;ERBA1;NR1A1;THRA1;TH | thyroid    | nucleus     | transcripti |
| GI_40806159-I | 122.3  | 114.3  | 99.1   | THRA     | <a href="#">NM_199334.1</a> | AR7;EAR7;ERBA;ERBA1;NR1A1;THRA1;TH | thyroid    | nucleus     | transcripti |
| GI_40806161-S | 88.7   | 85.1   | 95.6   | THRB     | <a href="#">NM_000461.2</a> | GRTH;THR1;ERBA2;NR1A2;THRB1;THRB2; | thyroid    | nucleus     | transcripti |
| GI_40806163-I | 138.6  | 149.8  | 142.7  | UBE2V1   | <a href="#">NM_021988.3</a> | CIR1;UEV1;CROC1;UEV-1;UEV1A;CROC-1 | ubiquitin  |             | protein     |
| GI_40806165-A | 6747.5 | 7236.3 | 6885.3 | UBE2V1   | <a href="#">NM_022442.3</a> | CIR1;UEV1;CROC1;UEV-1;UEV1A;CROC-1 | ubiquitin  |             | protein     |
| GI_40806168-S | 121.4  | 138.2  | 140.4  | SPG4     | <a href="#">NM_014946.3</a> | FSP2;ADPSP;SPAST;KIAA1083          | adenosine  | nucleus     |             |
| GI_40806171-I | 1457.1 | 1817.1 | 1844   | SPG7     | <a href="#">NM_003119.2</a> | CAR;PGN;CMAR                       | adenosine  | integral to | proteolysis |
| GI_40806172-I | 129.2  | 121.4  | 127    | SPG7     | <a href="#">NM_199367.1</a> | CAR;PGN;CMAR                       | adenosine  | integral to | proteolysis |
| GI_40806174-S | 104.1  | 102.6  | 112.3  | DGKQ     | <a href="#">NM_001347.2</a> | DAGK;DAGK4;DAGK7                   | diacylglyc |             | neuropepti  |
| GI_40806177-A | 143.6  | 213.3  | 154.2  | DSC2     | <a href="#">NM_024422.2</a> | DG2;DSC3;CDHF2;DGII/III            | cell       | cytoskelet  | cell        |
| GI_40806178-I | 176.7  | 204.8  | 195.5  | DustyPK  | <a href="#">NM_015375.1</a> | HDCMD38P;KIAA0472                  |            |             |             |
| GI_40806182-S | 1633.6 | 1196.7 | 1332   | FLJ10514 | <a href="#">NM_018122.3</a> |                                    | aspartate- | cytoplasm   | aspartyl-   |
| GI_40806183-S | 838.3  | 797.2  | 448.5  | FLJ13149 | <a href="#">NM_021826.4</a> |                                    |            |             |             |
| GI_40806184-A | 106.9  | 119.5  | 95.5   | ADAMTS18 | <a href="#">NM_139054.2</a> | ADAMTS21                           | metalloen  | extracellul | proteolysis |
| GI_40806186-I | 154.5  | 102.5  | 90.7   | ADAMTS18 | <a href="#">NM_199355.1</a> | ADAMTS21                           | metalloen  | extracellul | proteolysis |
| GI_40806188-S | 228.7  | 230.3  | 170.4  | HK2      | <a href="#">NM_000189.4</a> | HKII;HXK2                          | hexokinas  | mitochond   | glucose     |
| GI_40806189-I | 187.1  | 213.6  | 204.6  | Kua-UEV  | <a href="#">NM_199203.1</a> | CROC-1B                            |            |             |             |
| GI_40806191-I | 237    | 357.3  | 378.7  | Kua-UEV  | <a href="#">NM_003349.4</a> | CROC-1B                            |            |             |             |
| GI_40806192-S | 627.3  | 840.5  | 908    | Kua      | <a href="#">NM_199129.1</a> |                                    |            |             |             |
| GI_40806194-S | 295.7  | 299.6  | 282.4  | UBCE7IP5 | <a href="#">NM_014948.2</a> | RNF37                              |            | nucleus     |             |
| GI_40806197-S | 177.2  | 158.2  | 182.8  | SPG20    | <a href="#">NM_015087.3</a> | SPARTIN;TAHCCP1;KIAA0610           |            |             |             |
| GI_40806198-A | 102.5  | 115.1  | 109.9  | MAP2K7   | <a href="#">NM_145185.2</a> | MKK7;Jnkk2;MAPKK7;PRKMK7           | MAP        |             | response    |
| GI_40806198-I | 115.7  | 122.9  | 111.8  | MAP2K7   | <a href="#">NM_145185.2</a> | MKK7;Jnkk2;MAPKK7;PRKMK7           | MAP        |             | response    |
| GI_40806199-S | 94.4   | 100.9  | 101.8  | MTL5     | <a href="#">NM_004923.2</a> | MTLT;TESMIN                        | heavy      |             | metal ion   |
| GI_40806201-S | 6976.1 | 8522.6 | 6767.3 | NDUFB4   | <a href="#">NM_004547.4</a> | B15;CI-B15;MGC5105                 | NADH       | NADH        | mitochond   |
| GI_40806202-S | 2636.9 | 2952.2 | 4236.3 | NEU1     | <a href="#">NM_000434.2</a> | NEU;SIAL1                          | exo-alpha- | lysosome    | carbohydr   |
| GI_40806203-S | 100.1  | 118.9  | 101.1  | WFIKKNRP | <a href="#">NM_175575.4</a> |                                    | serine-    |             |             |
| GI_40806208-I | 306    | 429.8  | 517.9  | WWP2     | <a href="#">NM_199423.1</a> | AIP2                               | ubiquitin- | ubiquitin   | protein     |

|               |        |        |        |           |                             |                                    |             |             |              |
|---------------|--------|--------|--------|-----------|-----------------------------|------------------------------------|-------------|-------------|--------------|
| GI_40806210-I | 111.7  | 131.1  | 113.9  | WWP2      | <a href="#">NM_199424.1</a> | AIP2                               | ubiquitin-  | ubiquitin   | protein      |
| GI_40806212-S | 518    | 524.1  | 601.1  | VAPB      | <a href="#">NM_004738.3</a> | VAP-B;VAP-C;VAMP-B;VAMP-C          | structural  | kinesin     | nonselecti   |
| GI_40806213-S | 118.3  | 121    | 109.4  | VIAAT     | <a href="#">NM_080552.2</a> | VGAT                               | amino       | membran     | amino        |
| GI_40806214-I | 91.6   | 102.2  | 87.1   | VSX1      | <a href="#">NM_014588.4</a> | PPD;KTCN;PPCD;RINX                 | transcripti | nucleus     | vision       |
| GI_40806215-I | 165.4  | 192.4  | 187.2  | VSX1      | <a href="#">NM_199425.1</a> | PPD;KTCN;PPCD;RINX                 | transcripti | nucleus     | vision       |
| GI_40806217-S | 744.2  | 663.3  | 886.9  | THY28     | <a href="#">NM_014174.2</a> | MY105;MDS012;HSPC144;MGC12187      |             |             |              |
| GI_40806222-A | 712.4  | 804.1  | 868.7  | ZFP64     | <a href="#">NM_018197.2</a> | ZNF338                             |             |             |              |
| GI_40806224-I | 145.7  | 133.9  | 143.6  | ZFP64     | <a href="#">NM_022088.4</a> | ZNF338                             |             |             |              |
| GI_40806228-I | 805.7  | 778.5  | 574.3  | ZFP64     | <a href="#">NM_199427.1</a> | ZNF338                             |             |             |              |
| GI_40807350-S | 273.8  | 171.5  | 250.4  | SLC36A4   | <a href="#">NM_152313.2</a> | PAT4;FLJ38932                      | amino       | membran     | amino        |
| GI_40807356-S | 107    | 112.8  | 120.1  | SLC27A4   | <a href="#">NM_005094.2</a> | FATP4                              | fatty acid  |             | fatty acid   |
| GI_40807361-S | 2784.3 | 3194.2 | 3027.3 | RAB7      | <a href="#">NM_004637.5</a> | PSN;CMT2B;PRO2706                  | RAB small   | late        | endocytosi   |
| GI_40807362-S | 103    | 110.1  | 97.2   | RDH-E2    | <a href="#">NM_138969.2</a> | FLJ33105                           | oxidoredu   |             | metabolis    |
| GI_40807365-S | 2440.9 | 2442   | 2468.3 | PP3111    | <a href="#">NM_022156.3</a> |                                    |             |             |              |
| GI_40807367-I | 128.8  | 134.2  | 119.2  | KCNRG     | <a href="#">NM_199464.1</a> |                                    |             |             |              |
| GI_40807441-S | 1458.5 | 1585.3 | 2069.4 | PRC1      | <a href="#">NM_003981.2</a> | MGC1671;MGC3669                    |             | spindle     | mitotic      |
| GI_40807446-S | 997.7  | 1101.4 | 1090.8 | PRCC      | <a href="#">NM_005973.4</a> | TPRC;RCCP1;MGC4723;MGC17178        | molecular   | cellular_co | cell growth  |
| GI_40807451-S | 1080.3 | 888    | 764.5  | PPRC1     | <a href="#">NM_015062.3</a> | PRC;KIAA0595;MGC74642              | nucleic     |             |              |
| GI_40807453-S | 517.4  | 598.9  | 316.2  | ZNF133    | <a href="#">NM_003434.3</a> | pHZ-13                             | transcripti | nucleus     | regulation   |
| GI_40807454-S | 779.7  | 942.4  | 1082.1 | ZNF217    | <a href="#">NM_006526.2</a> | ZABC1                              | transcripti | nucleus     | transcripti  |
| GI_40807455-S | 2661.7 | 2438.3 | 3332.8 | ZNF313    | <a href="#">NM_018683.3</a> | RNF114                             |             |             |              |
| GI_40807456-A | 105.1  | 115.9  | 105.1  | ZNF334    | <a href="#">NM_018102.3</a> |                                    |             |             |              |
| GI_40807458-I | 97.3   | 99.5   | 96.9   | ZNF334    | <a href="#">NM_199441.1</a> |                                    |             |             |              |
| GI_40807460-S | 142.3  | 160.8  | 167.8  | ZNF335    | <a href="#">NM_022095.3</a> | NIF1                               | DNA         | nucleus     | regulation   |
| GI_40807461-S | 158.1  | 165.8  | 107.7  | ZNF336    | <a href="#">NM_022482.3</a> | GZF1                               | protein     | nucleus     | regulation   |
| GI_40807464-S | 114.6  | 118.1  | 112.6  | ZNF341    | <a href="#">NM_032819.3</a> |                                    | DNA         | nucleus     | regulation   |
| GI_40807466-S | 111.6  | 90.7   | 89     | TNNC2     | <a href="#">NM_003279.2</a> |                                    | calcium     | troponin    | regulation   |
| GI_40807467-S | 3116.8 | 3395.1 | 4432.2 | TOMM34    | <a href="#">NM_006809.4</a> | TOM34;HTOM34P                      | signal      | mitochond   | mitochond    |
| GI_40807468-S | 386.1  | 258.8  | 353.8  | TRIP      | <a href="#">NM_005879.2</a> | TRAIP                              |             |             | induction    |
| GI_40807470-S | 494.9  | 638.4  | 560.6  | TTF2      | <a href="#">NM_003594.3</a> | HuF2                               | Pol II      | transcripti | transcripti  |
| GI_40807473-S | 99.7   | 127.7  | 114.8  | ORM2      | <a href="#">NM_000608.2</a> | AGP2;AGP-B;AGP-B'                  | acute-      | extracellul | acute-       |
| GI_40807474-S | 130.2  | 135.6  | 124.7  | PRAM-1    | <a href="#">NM_032152.3</a> | MGC39864                           |             |             |              |
| GI_40807476-I | 268.4  | 264.4  | 205.6  | RAI1      | <a href="#">NM_030665.3</a> | SMS;SMCR;KIAA1820;MGC12824;DKFZP43 |             |             |              |
| GI_40807478-S | 111.2  | 116.3  | 120.2  | SOCS4     | <a href="#">NM_080867.2</a> | SOCS7                              | DNA         | nucleus     | intracellula |
| GI_40807479-I | 111.6  | 133.2  | 115    | SOCS4     | <a href="#">NM_199421.1</a> | SOCS7                              | DNA         | nucleus     | intracellula |
| GI_40807481-S | 89.3   | 99.8   | 89.4   | C20orf114 | <a href="#">NM_033197.2</a> | LPLUNC1;MGC14597                   | lipid       |             |              |
| GI_40807483-S | 1404.2 | 1295   | 1522.8 | C20orf126 | <a href="#">NM_030815.2</a> | PDRG                               |             |             |              |
| GI_40807484-S | 1493.2 | 1294.5 | 1788.4 | C20orf14  | <a href="#">NM_012469.2</a> | TOM;ANT-1                          | pre-mRNA    | spliceoso   | spliceoso    |
| GI_40807486-S | 183.2  | 172.5  | 179.3  | NEURL2    | <a href="#">NM_080749.2</a> |                                    |             |             | intracellula |
| GI_40807487-S | 178.8  | 204.8  | 188    | C20orf165 | <a href="#">NM_080608.3</a> | dJ337O18.8                         |             | integral to |              |
| GI_40807488-S | 233.3  | 444.1  | 160.7  | EMR1      | <a href="#">NM_001974.3</a> |                                    | G-protein   | integral to | G-protein    |
| GI_40807492-S | 813.6  | 828.3  | 711.4  | FBXO34    | <a href="#">NM_017943.2</a> | CGI-301;FLJ20725;DKFZp547C162      | molecular   |             |              |
| GI_40807494-A | 98.6   | 110.2  | 90.2   | HSNIN1    | <a href="#">NM_017493.4</a> | HIN1;KIAA1046;DKFZp434I0721        | molecular   | cellular_co | biological_  |
| GI_40807495-I | 1124.5 | 851.8  | 623.6  | HSNIN1    | <a href="#">NM_199324.1</a> | HIN1;KIAA1046;DKFZp434I0721        | molecular   | cellular_co | biological_  |

|               |         |        |        |             |                             |                             |                     |                     |
|---------------|---------|--------|--------|-------------|-----------------------------|-----------------------------|---------------------|---------------------|
| GI_40807499-S | 276.3   | 311.3  | 270.8  | AB026190    | <a href="#">NM_014458.3</a> |                             | actin               | cytoskelet          |
| GI_40807503-I | 128.5   | 147.6  | 138.5  | AFAP        | <a href="#">NM_198595.1</a> | AFAP-110                    |                     |                     |
| GI_40807505-A | 510.9   | 691.3  | 627.3  | AFAP        | <a href="#">NM_021638.3</a> | AFAP-110                    |                     |                     |
| GI_41053624-S | 163.9   | 213.1  | 161.9  | MMAB        | <a href="#">NM_052845.2</a> | ATR;MGC20496                | transferas          | mitochond           |
| GI_41054803-S | 164.9   | 187.5  | 462.1  | MGC15882    | <a href="#">NM_032884.2</a> |                             | DNA                 | nucleus regulation  |
| GI_41054843-S | 158.7   | 180.7  | 187.7  | DNAJB12     | <a href="#">NM_017626.2</a> | FLJ20027                    | chaperone           | integral to protein |
| GI_41054845-S | 255.3   | 245    | 255.5  | FLJ12969    | <a href="#">NM_022838.2</a> | FLJ13382                    | ATP                 |                     |
| GI_41055004-S | 1309.7  | 1331.3 | 1043.5 | TTC17       | <a href="#">NM_018259.3</a> | FLJ10890                    |                     |                     |
| GI_41055203-A | 932.8   | 996.3  | 1141.6 | KNS2        | <a href="#">NM_182923.2</a> | KLC;KLC1;KNS2A              | motor               | kinesin microtubul  |
| GI_41055203-I | 180.8   | 227.1  | 209.2  | KNS2        | <a href="#">NM_182923.2</a> | KLC;KLC1;KNS2A              | motor               | kinesin microtubul  |
| GI_41055952-S | 156.3   | 173.1  | 160.6  | USP40       | <a href="#">NM_018218.1</a> | FLJ10785                    | cysteine-           | ubiquitin-          |
| GI_41055988-S | 311.7   | 353    | 382.4  | HSMPP8      | <a href="#">NM_017520.2</a> |                             | molecular cytoplasm | cell cycle          |
| GI_41056186-S | 653     | 731.5  | 631.9  | USP34       | <a href="#">NM_014709.2</a> | KIAA0570;KIAA0729           | cysteine-           | ubiquitin-          |
| GI_41056258-I | 124.3   | 104    | 99.4   | SLC43A3     | <a href="#">NM_199329.1</a> | EEG1;FOAP-13;PRO1659;SEEEG- |                     |                     |
| GI_41057795-S | 135.1   | 157.2  | 131.5  | LOC389804   | <a href="#">XM_374308.1</a> |                             |                     |                     |
| GI_41057810-S | 120.7   | 136.5  | 127    | LOC389806   | <a href="#">XM_374309.1</a> |                             |                     |                     |
| GI_41057820-S | 245.8   | 300.5  | 283.8  | LOC388663   | <a href="#">XM_373857.1</a> |                             |                     |                     |
| GI_41058250-S | 96.3    | 100.6  | 102.3  | LOC390995   | <a href="#">XM_372758.1</a> |                             |                     |                     |
| GI_41058258-S | 107     | 112.8  | 93.8   | LOC390999   | <a href="#">XM_372760.1</a> |                             |                     |                     |
| GI_41058279-S | 107.8   | 110.9  | 117.7  | LOC388644   | <a href="#">XM_373850.1</a> |                             |                     |                     |
| GI_41103619-S | 147.6   | 139.4  | 132.4  | NY-SAR-41   | <a href="#">XM_371270.1</a> |                             |                     |                     |
| GI_41103645-S | 120.2   | 117.8  | 110.7  | LOC391062   | <a href="#">XM_372785.1</a> |                             |                     |                     |
| GI_41104564-S | 127.2   | 138.6  | 133.6  | OR2M4       | <a href="#">XM_371358.1</a> |                             |                     |                     |
| GI_41104585-S | 138.9   | 168.2  | 166.9  | LOC391191   | <a href="#">XM_372822.1</a> |                             |                     |                     |
| GI_41104601-S | 239.9   | 294.2  | 257.9  | LOC391195   | <a href="#">XM_372826.1</a> |                             |                     |                     |
| GI_41106713-S | 168.6   | 181.1  | 175    | LOC388699   | <a href="#">XM_371314.1</a> |                             |                     |                     |
| GI_41107411-S | 130.6   | 155.5  | 134.1  | LOC388623   | <a href="#">XM_373840.1</a> |                             |                     |                     |
| GI_41107446-S | 87.7    | 97.2   | 91.4   | LOC388632   | <a href="#">XM_371252.1</a> |                             |                     |                     |
| GI_41107456-S | 241.9   | 257.5  | 251.4  | LOC388635   | <a href="#">XM_373844.1</a> |                             |                     |                     |
| GI_41107468-S | 296.4   | 230.5  | 155.4  | KIAA1579    | <a href="#">XM_371258.1</a> |                             |                     |                     |
| GI_41107475-S | 108.2   | 113.7  | 104.1  | DKFZp547104 | <a href="#">XM_371259.1</a> |                             |                     |                     |
| GI_41107500-S | 116.5   | 126    | 114.9  | LOC391092   | <a href="#">XM_372792.1</a> |                             |                     |                     |
| GI_41107683-S | 97.2    | 100.9  | 92.4   | LOC388609   | <a href="#">XM_373832.1</a> |                             |                     |                     |
| GI_41107685-S | 109.7   | 114.7  | 85.8   | CATSPER4    | <a href="#">XM_371237.1</a> |                             |                     |                     |
| GI_41107691-S | 125.8   | 143.7  | 125.9  | LOC388612   | <a href="#">XM_373833.1</a> |                             |                     |                     |
| GI_41107699-S | 27061.2 | 22148  | 18917  | LOC391023   | <a href="#">XM_372773.1</a> |                             |                     |                     |
| GI_41107701-S | 128.6   | 164.9  | 142.2  | DJ159A19.3  | <a href="#">XM_372774.1</a> |                             |                     |                     |
| GI_41109026-S | 169.3   | 190.3  | 187.1  | LOC388614   | <a href="#">XM_373835.1</a> |                             |                     |                     |
| GI_41109030-S | 132.3   | 131.6  | 127.5  | LOC388615   | <a href="#">XM_373836.1</a> |                             |                     |                     |
| GI_41110098-S | 84.2    | 76.5   | 91     | LOC388746   | <a href="#">XM_373890.1</a> |                             |                     |                     |
| GI_41111276-S | 168.7   | 193.8  | 176.9  | LOC388601   | <a href="#">XM_373828.1</a> |                             |                     |                     |
| GI_41112871-S | 270.6   | 330.8  | 301.8  | LOC388725   | <a href="#">XM_371334.1</a> |                             |                     |                     |
| GI_41113031-S | 101.2   | 109.8  | 105    | LOC388646   | <a href="#">XM_371265.1</a> |                             |                     |                     |
| GI_41114101-S | 99.4    | 125.7  | 106.2  | LOC339077   | <a href="#">XM_294802.4</a> |                             |                     |                     |

|               |        |        |        |           |                             |
|---------------|--------|--------|--------|-----------|-----------------------------|
| GI_41114103-S | 104.6  | 113.2  | 101.5  | LOC388758 | <a href="#">XM 373898.1</a> |
| GI_41114495-S | 158.1  | 191.2  | 187.4  | LOC388594 | <a href="#">XM 371221.1</a> |
| GI_41114528-S | 251    | 288.8  | 267.8  | LOC391005 | <a href="#">XM 372765.1</a> |
| GI_41114575-S | 116.8  | 135.1  | 124.1  | LOC374947 | <a href="#">XM 291625.3</a> |
| GI_41114579-S | 98.7   | 88.1   | 76.6   | LOC391001 | <a href="#">XM 372761.1</a> |
| GI_41114582-S | 140.2  | 166.3  | 159.1  | LOC391002 | <a href="#">XM 372762.1</a> |
| GI_41115071-S | 115.8  | 131    | 115.4  | LOC388580 | <a href="#">XM 373818.1</a> |
| GI_41115343-S | 99.4   | 96.8   | 91.6   | LOC391012 | <a href="#">XM 372768.1</a> |
| GI_41115452-S | 143.1  | 166.5  | 150    | LOC388673 | <a href="#">XM 371291.1</a> |
| GI_41116237-S | 115.9  | 116.6  | 107.7  | LOC391027 | <a href="#">XM 372776.1</a> |
| GI_41117239-S | 106.3  | 97.8   | 99.5   | LOC391201 | <a href="#">XM 372833.1</a> |
| GI_41117409-S | 2179.9 | 2084.8 | 2173.3 | S100A13   | <a href="#">XM 371380.1</a> |
| GI_41117712-S | 134.4  | 125.8  | 126.4  | LOC388926 | <a href="#">XM 371477.1</a> |
| GI_41117724-S | 109.7  | 119.5  | 111.1  | LOC391353 | <a href="#">XM 372917.1</a> |
| GI_41118748-S | 115.6  | 112.5  | 100.4  | LOC389025 | <a href="#">XM 374004.1</a> |
| GI_41118759-S | 328.6  | 372.2  | 358.9  | LOC389028 | <a href="#">XM 374006.1</a> |
| GI_41118768-S | 128.2  | 141    | 115.7  | LOC391427 | <a href="#">XM 372952.1</a> |
| GI_41118879-S | 530.1  | 270.1  | 238    | LOC388922 | <a href="#">XM 371476.1</a> |
| GI_41119889-S | 98     | 105.8  | 93.2   | LOC391419 | <a href="#">XM 372946.1</a> |
| GI_41120019-S | 211.8  | 255    | 233.7  | LOC389089 | <a href="#">XM 374029.1</a> |
| GI_41123791-S | 96.2   | 100.1  | 92.9   | LOC388929 | <a href="#">XM 371480.1</a> |
| GI_41123794-S | 233.1  | 261.6  | 262.8  | LOC388930 | <a href="#">XM 373975.1</a> |
| GI_41123815-S | 99.1   | 116    | 118.6  | LOC388934 | <a href="#">XM 373977.1</a> |
| GI_41124044-S | 103.5  | 104.9  | 89.4   | LOC391342 | <a href="#">XM 372910.1</a> |
| GI_41124491-S | 102.1  | 107.5  | 95.3   | LOC389005 | <a href="#">XM 371537.1</a> |
| GI_41124889-S | 507    | 627.1  | 556.4  | LOC391403 | <a href="#">XM 372940.1</a> |
| GI_41125701-S | 428.8  | 523.8  | 474.5  | LOC389038 | <a href="#">XM 374011.1</a> |
| GI_41125704-S | 114.4  | 135.6  | 130.5  | LOC389039 | <a href="#">XM 371561.1</a> |
| GI_41125747-S | 127.1  | 161.5  | 134.8  | LOC389050 | <a href="#">XM 374014.1</a> |
| GI_41125793-S | 107.7  | 125.6  | 105    | LOC391446 | <a href="#">XM 372959.1</a> |
| GI_41126366-S | 103.1  | 94.4   | 103.9  | LOC389032 | <a href="#">XM 374009.1</a> |
| GI_41126929-S | 138.1  | 157.5  | 127.2  | LOC391493 | <a href="#">XM 372974.1</a> |
| GI_41133988-S | 93.7   | 104.8  | 101.6  | LOC389055 | <a href="#">XM 374016.1</a> |
| GI_41144256-S | 624.3  | 758.7  | 577.8  | FLJ10707  | <a href="#">XM 371614.1</a> |
| GI_41144279-S | 110.8  | 117.9  | 122.9  | LOC389096 | <a href="#">XM 371618.1</a> |
| GI_41144284-S | 85.7   | 179    | 101.7  | FGD5      | <a href="#">XM 371619.1</a> |
| GI_41144322-S | 144.6  | 166    | 164.3  | LOC389102 | <a href="#">XM 371623.1</a> |
| GI_41144338-S | 122.1  | 122    | 116.5  | LOC389105 | <a href="#">XM 374037.1</a> |
| GI_41144364-S | 141.6  | 147.3  | 143.3  | LOC389111 | <a href="#">XM 371629.1</a> |
| GI_41144864-S | 517.5  | 661.7  | 576.1  | LOC389188 | <a href="#">XM 374070.1</a> |
| GI_41144869-S | 187.7  | 210.5  | 212.7  | LOC389189 | <a href="#">XM 374071.1</a> |
| GI_41144883-S | 109.6  | 100.4  | 98.7   | LOC389192 | <a href="#">XM 371684.1</a> |
| GI_41146521-S | 94     | 85.3   | 85.9   | LOC389138 | <a href="#">XM 371656.1</a> |
| GI_41146525-S | 89.2   | 96.3   | 96.7   | LOC389139 | <a href="#">XM 374045.1</a> |

|               |         |       |       |           |                             |
|---------------|---------|-------|-------|-----------|-----------------------------|
| GI_41146530-S | 13195.2 | 13174 | 10591 | LOC389141 | <a href="#">XM 371658.1</a> |
| GI_41146541-S | 90.3    | 95.9  | 85.1  | LOC389142 | <a href="#">XM 374046.1</a> |
| GI_41146558-S | 117.4   | 124.5 | 122.3 | LOC255330 | <a href="#">XM 371662.1</a> |
| GI_41146599-S | 119.6   | 142.9 | 117.2 | LOC389159 | <a href="#">XM 374055.1</a> |
| GI_41146605-S | 100.4   | 102.6 | 96.5  | LOC389161 | <a href="#">XM 374057.1</a> |
| GI_41146621-S | 111.4   | 109.5 | 104.1 | LOC389170 | <a href="#">XM 371674.1</a> |
| GI_41146631-S | 90      | 104.2 | 87.6  | LOC389173 | <a href="#">XM 371677.1</a> |
| GI_41146633-S | 97.4    | 91.4  | 89.9  | LOC389174 | <a href="#">XM 371678.1</a> |
| GI_41146646-S | 124.4   | 113.5 | 105.7 | LOC389180 | <a href="#">XM 371682.1</a> |
| GI_41146652-S | 128.9   | 147.1 | 147.4 | LOC389184 | <a href="#">XM 374066.1</a> |
| GI_41146696-S | 121.2   | 140.1 | 132.1 | LOC389230 | <a href="#">XM 374088.1</a> |
| GI_41146703-S | 120.5   | 129.3 | 116   | LOC389232 | <a href="#">XM 374090.1</a> |
| GI_41146705-S | 201.8   | 231.3 | 218.7 | LOC389233 | <a href="#">XM 374091.1</a> |
| GI_41146709-S | 139.9   | 142.8 | 136.3 | LOC389234 | <a href="#">XM 374092.1</a> |
| GI_41146716-S | 96      | 94.1  | 93.2  | LOC389237 | <a href="#">XM 374094.1</a> |
| GI_41146730-S | 122.3   | 123.1 | 118.4 | LOC391711 | <a href="#">XM 373037.1</a> |
| GI_41146732-S | 206.5   | 215.5 | 178.7 | LOC391712 | <a href="#">XM 373038.1</a> |
| GI_41146752-S | 105.4   | 117.3 | 98.8  | LOC389242 | <a href="#">XM 374095.1</a> |
| GI_41146762-S | 117.3   | 135.5 | 128.1 | LOC389246 | <a href="#">XM 371718.1</a> |
| GI_41146772-S | 145     | 158.6 | 124.4 | LOC389250 | <a href="#">XM 374101.1</a> |
| GI_41146786-S | 107.1   | 114.3 | 114.5 | LOC391723 | <a href="#">XM 373043.1</a> |
| GI_41146796-S | 187.1   | 222.4 | 200.7 | LOC391728 | <a href="#">XM 374368.1</a> |
| GI_41146798-S | 138.9   | 149.1 | 128.2 | LOC391729 | <a href="#">XM 374369.1</a> |
| GI_41146809-S | 84.1    | 88.8  | 83.4  | LOC391654 | <a href="#">XM 373026.1</a> |
| GI_41146823-S | 143.9   | 156   | 143.5 | LOC389197 | <a href="#">XM 371687.1</a> |
| GI_41146825-S | 126.3   | 143.9 | 126.6 | LOC389198 | <a href="#">XM 374076.1</a> |
| GI_41146841-S | 133.5   | 128   | 125.8 | LOC389206 | <a href="#">XM 371693.1</a> |
| GI_41146856-S | 315.1   | 405.2 | 355   | LOC389201 | <a href="#">XM 374077.1</a> |
| GI_41146861-S | 106     | 138.9 | 122.7 | LOC285548 | <a href="#">XM 374078.1</a> |
| GI_41146898-S | 118.8   | 110   | 106.6 | LOC389209 | <a href="#">XM 374081.1</a> |
| GI_41146916-S | 154.3   | 181.2 | 171.2 | LOC389262 | <a href="#">XM 374106.1</a> |
| GI_41146927-S | 256.7   | 340.3 | 289.3 | LOC389268 | <a href="#">XM 374110.1</a> |
| GI_41146929-S | 84.2    | 83.9  | 85.1  | LOC389269 | <a href="#">XM 374111.1</a> |
| GI_41146931-S | 106.9   | 100.4 | 99.2  | LOC389340 | <a href="#">XM 374147.1</a> |
| GI_41146946-S | 134.6   | 154.1 | 134.5 | LOC389343 | <a href="#">XM 374148.1</a> |
| GI_41146960-S | 195.1   | 240.6 | 217.5 | LOC391844 | <a href="#">XM 373098.1</a> |
| GI_41146964-S | 164.8   | 161.8 | 146.6 | LOC391847 | <a href="#">XM 373099.1</a> |
| GI_41146980-S | 125.4   | 135.9 | 125.1 | LOC389310 | <a href="#">XM 374130.1</a> |
| GI_41147023-S | 175.5   | 158.3 | 154.5 | LOC389316 | <a href="#">XM 374132.1</a> |
| GI_41147030-S | 107.4   | 116.5 | 112.5 | LOC389319 | <a href="#">XM 374134.1</a> |
| GI_41147036-S | 82.9    | 88.5  | 90.7  | LOC389321 | <a href="#">XM 371769.1</a> |
| GI_41147060-S | 108.2   | 111.6 | 98.8  | LOC389332 | <a href="#">XM 374141.1</a> |
| GI_41147065-S | 98.3    | 91.1  | 88    | LOC389334 | <a href="#">XM 374143.1</a> |
| GI_41147107-S | 167.7   | 177.9 | 169.3 | LOC389279 | <a href="#">XM 371729.1</a> |

|               |       |       |       |           |                             |
|---------------|-------|-------|-------|-----------|-----------------------------|
| GI_41147113-S | 136.9 | 143.3 | 121.6 | LOC389282 | <a href="#">XM 371732.1</a> |
| GI_41147167-S | 103.2 | 107.7 | 104.1 | LOC391767 | <a href="#">XM 373078.1</a> |
| GI_41147169-S | 159.5 | 159.1 | 154.6 | LOC391769 | <a href="#">XM 373079.1</a> |
| GI_41147171-S | 157.4 | 170.6 | 160.2 | LOC391770 | <a href="#">XM 373080.1</a> |
| GI_41147177-S | 117.9 | 137.1 | 129.1 | LOC389301 | <a href="#">XM 371754.1</a> |
| GI_41147197-S | 115.5 | 121.2 | 127.5 | LOC389306 | <a href="#">XM 374127.1</a> |
| GI_41147203-S | 118.6 | 107.4 | 111.6 | LOC389308 | <a href="#">XM 371758.1</a> |
| GI_41147213-S | 192.8 | 216   | 202.6 | LOC391802 | <a href="#">XM 373091.1</a> |
| GI_41147217-S | 96.5  | 93.6  | 107.9 | LOC391807 | <a href="#">XM 373092.1</a> |
| GI_41147230-S | 94.9  | 103.9 | 96.4  | LOC389351 | <a href="#">XM 371790.1</a> |
| GI_41147232-S | 184.8 | 220.6 | 208.9 | LOC202404 | <a href="#">XM 114481.6</a> |
| GI_41147237-S | 93.7  | 99.8  | 94.1  | LOC389353 | <a href="#">XM 374152.1</a> |
| GI_41147247-S | 114.2 | 96.3  | 108.9 | LOC391859 | <a href="#">XM 373106.1</a> |
| GI_41147265-S | 106.5 | 109   | 91.8  | LOC391794 | <a href="#">XM 373088.1</a> |
| GI_41147292-S | 105.2 | 94.8  | 94.2  | LOC389357 | <a href="#">XM 374154.1</a> |
| GI_41147294-S | 140.1 | 168.3 | 144   | LOC389358 | <a href="#">XM 374155.1</a> |
| GI_41147296-S | 555.2 | 690.8 | 606.3 | LOC389359 | <a href="#">XM 374156.1</a> |
| GI_41147298-S | 93.6  | 110.6 | 111.9 | LOC389360 | <a href="#">XM 374157.1</a> |
| GI_41147300-S | 87    | 89.6  | 82.4  | LOC389361 | <a href="#">XM 374158.1</a> |
| GI_41147306-S | 129.5 | 132.1 | 125.4 | LOC389364 | <a href="#">XM 371796.1</a> |
| GI_41147315-S | 120.6 | 118.4 | 110.4 | LOC389403 | <a href="#">XM 374172.1</a> |
| GI_41147328-S | 168.2 | 174.5 | 161.1 | LOC389411 | <a href="#">XM 374174.1</a> |
| GI_41147340-S | 223.5 | 319.5 | 287.4 | LOC389414 | <a href="#">XM 374176.1</a> |
| GI_41147342-S | 147.6 | 144.9 | 135.3 | LOC389415 | <a href="#">XM 374177.1</a> |
| GI_41147351-S | 163.9 | 196.8 | 165.7 | LOC389450 | <a href="#">XM 374194.1</a> |
| GI_41147355-S | 153.9 | 123.5 | 119.1 | LOC389438 | <a href="#">XM 374186.1</a> |
| GI_41147357-S | 161.8 | 190.1 | 161.9 | LOC389439 | <a href="#">XM 374187.1</a> |
| GI_41147365-S | 164.4 | 195.3 | 174.2 | LOC389443 | <a href="#">XM 374191.1</a> |
| GI_41147367-S | 103.5 | 118.7 | 109.1 | LOC389444 | <a href="#">XM 371856.1</a> |
| GI_41147373-S | 130.6 | 151.1 | 131.6 | LOC389447 | <a href="#">XM 374192.1</a> |
| GI_41147381-S | 88.4  | 97.1  | 92.1  | LOC389449 | <a href="#">XM 374193.1</a> |
| GI_41147425-S | 285.3 | 352.8 | 330.8 | LOC389455 | <a href="#">XM 374198.1</a> |
| GI_41147464-S | 116.3 | 119   | 119.1 | LOC392160 | <a href="#">XM 374370.1</a> |
| GI_41147534-S | 112.1 | 109.2 | 99.4  | LOC392164 | <a href="#">XM 373224.1</a> |
| GI_41147544-S | 98.9  | 103.2 | 97.3  | LOC389456 | <a href="#">XM 374199.1</a> |
| GI_41147546-S | 414.1 | 433.1 | 407.7 | LOC389562 | <a href="#">XM 374236.1</a> |
| GI_41147787-S | 109   | 122.4 | 127.9 | LOC392657 | <a href="#">XM 374721.1</a> |
| GI_41147791-S | 359.5 | 456.2 | 396.8 | LOC392660 | <a href="#">XM 374427.1</a> |
| GI_41147807-S | 92.1  | 105.1 | 88.8  | LOC392668 | <a href="#">XM 374434.1</a> |
| GI_41147813-S | 135   | 157.3 | 149.2 | LOC392670 | <a href="#">XM 374437.1</a> |
| GI_41147857-S | 152   | 187.7 | 191.4 | LOC392862 | <a href="#">XM 374600.1</a> |
| GI_41147867-S | 258.1 | 279.4 | 261.6 | LOC392888 | <a href="#">XM 374605.1</a> |
| GI_41147873-S | 149.5 | 157.2 | 151.9 | MGC26484  | <a href="#">XM 374608.1</a> |
| GI_41147897-S | 141.1 | 161.4 | 149.2 | LOC392702 | <a href="#">XM 374730.1</a> |

|               |       |       |       |           |                             |
|---------------|-------|-------|-------|-----------|-----------------------------|
| GI_41147939-S | 188.5 | 221.8 | 187.9 | LOC392726 | <a href="#">XM 374734.1</a> |
| GI_41148005-S | 85.1  | 108   | 91.8  | PPP1R9A   | <a href="#">XM 374491.1</a> |
| GI_41148031-S | 126.6 | 121.3 | 121   | LOC392762 | <a href="#">XM 374501.1</a> |
| GI_41148131-S | 106.8 | 108.7 | 108.4 | LOC392791 | <a href="#">XM 374752.1</a> |
| GI_41148163-S | 120.6 | 159.3 | 123.6 | KIAA1277  | <a href="#">XM 374538.1</a> |
| GI_41148256-S | 112.5 | 102.2 | 108.9 | LOC392842 | <a href="#">XM 374585.1</a> |
| GI_41148258-S | 89.7  | 95    | 81.9  | LOC392843 | <a href="#">XM 374586.1</a> |
| GI_41148268-S | 111.3 | 110.8 | 104.5 | LOC392964 | <a href="#">XM 374636.1</a> |
| GI_41148288-S | 130.1 | 147.6 | 132.3 | LOC392979 | <a href="#">XM 374646.1</a> |
| GI_41148302-S | 161.5 | 191   | 174.2 | LOC392993 | <a href="#">XM 374653.1</a> |
| GI_41148356-S | 141.1 | 157.4 | 147.8 | LOC393037 | <a href="#">XM 374680.1</a> |
| GI_41148360-S | 139.9 | 160.9 | 131.4 | LOC393045 | <a href="#">XM 374682.1</a> |
| GI_41148370-S | 91.7  | 90.5  | 78.8  | LOC393051 | <a href="#">XM 374687.1</a> |
| GI_41148384-S | 198   | 249.9 | 209.3 | LOC393062 | <a href="#">XM 374694.1</a> |
| GI_41148406-S | 132.9 | 126.8 | 180.4 | LOC392848 | <a href="#">XM 374589.1</a> |
| GI_41148408-S | 161.1 | 182.7 | 156.3 | LOC392849 | <a href="#">XM 374761.1</a> |
| GI_41148412-S | 119.7 | 123.3 | 124.9 | LOC392851 | <a href="#">XM 374591.1</a> |
| GI_41148418-S | 129.9 | 141.2 | 133   | LOC393076 | <a href="#">XM 374763.1</a> |
| GI_41148428-S | 107.8 | 113.2 | 102.8 | LOC389639 | <a href="#">XM 374258.1</a> |
| GI_41148453-S | 140.4 | 165.6 | 134.5 | LOC392208 | <a href="#">XM 373246.1</a> |
| GI_41148459-S | 89.1  | 117.3 | 103.5 | LOC389654 | <a href="#">XM 374267.1</a> |
| GI_41148469-S | 104.9 | 124.5 | 115.1 | LOC389694 | <a href="#">XM 372062.1</a> |
| GI_41148475-S | 121.4 | 134.1 | 113.5 | LOC389697 | <a href="#">XM 372063.1</a> |
| GI_41148493-S | 121.1 | 136.8 | 122.1 | LOC389609 | <a href="#">XM 374244.1</a> |
| GI_41148521-S | 233.8 | 259.2 | 252   | LOC392177 | <a href="#">XM 374371.1</a> |
| GI_41148533-S | 121.6 | 120.8 | 111.7 | LOC389690 | <a href="#">XM 372060.1</a> |
| GI_41148591-S | 108.4 | 115.1 | 107.3 | LOC389626 | <a href="#">XM 372026.1</a> |
| GI_41148593-S | 123.2 | 109.7 | 105.8 | LOC389627 | <a href="#">XM 372027.1</a> |
| GI_41148634-S | 117   | 114.7 | 112.9 | LOC389647 | <a href="#">XM 374263.1</a> |
| GI_41148662-S | 134.6 | 158.4 | 131.6 | LOC389684 | <a href="#">XM 374278.1</a> |
| GI_41148670-S | 408.2 | 510.8 | 464.8 | LOC389687 | <a href="#">XM 374281.1</a> |
| GI_41148687-S | 116.1 | 128.5 | 115.8 | LOC392262 | <a href="#">XM 373263.1</a> |
| GI_41148721-S | 113   | 127.4 | 119.2 | LOC389666 | <a href="#">XM 374272.1</a> |
| GI_41148766-S | 108.3 | 123.8 | 115.1 | LOC389651 | <a href="#">XM 372039.1</a> |
| GI_41148781-S | 143.5 | 160.2 | 140.2 | LOC389763 | <a href="#">XM 372120.1</a> |
| GI_41148787-S | 92.6  | 91.3  | 92.6  | LOC389766 | <a href="#">XM 372123.1</a> |
| GI_41148795-S | 101.4 | 118.7 | 98.7  | LOC389768 | <a href="#">XM 372125.1</a> |
| GI_41148815-S | 128.6 | 129.9 | 127.5 | LOC389796 | <a href="#">XM 372148.1</a> |
| GI_41148823-S | 88.1  | 93.4  | 84.5  | LOC392396 | <a href="#">XM 373320.1</a> |
| GI_41148833-S | 115.1 | 111.1 | 109.9 | LOC389727 | <a href="#">XM 372092.1</a> |
| GI_41148849-S | 573.6 | 618.5 | 555.6 | LOC389739 | <a href="#">XM 372100.1</a> |
| GI_41148989-S | 102   | 113.4 | 94.4  | LOC389720 | <a href="#">XM 374294.1</a> |
| GI_41148998-S | 96.7  | 88.9  | 90.9  | LOC392285 | <a href="#">XM 373275.1</a> |
| GI_41149002-S | 85.1  | 107.4 | 80.4  | LOC392288 | <a href="#">XM 373277.1</a> |



|               |        |        |        |           |                             |
|---------------|--------|--------|--------|-----------|-----------------------------|
| GI_41149014-S | 94.7   | 105.5  | 101.8  | LOC392299 | <a href="#">XM 373283.1</a> |
| GI_41149016-S | 97.6   | 97     | 77.7   | LOC392300 | <a href="#">XM 373284.1</a> |
| GI_41149020-S | 95.1   | 102.7  | 94.2   | LOC392308 | <a href="#">XM 373288.1</a> |
| GI_41149035-S | 159.1  | 168.8  | 159.6  | LOC389778 | <a href="#">XM 374301.1</a> |
| GI_41149048-S | 105.3  | 110.2  | 113.4  | LOC389783 | <a href="#">XM 374303.1</a> |
| GI_41149074-S | 102.8  | 92.7   | 79.9   | LOC389775 | <a href="#">XM 374299.1</a> |
| GI_41149110-S | 118.2  | 114.5  | 105.5  | LOC387695 | <a href="#">XM 370566.1</a> |
| GI_41149128-S | 141.2  | 157.4  | 147.1  | LOC387702 | <a href="#">XM 370570.1</a> |
| GI_41149184-S | 100.8  | 98.4   | 101.7  | LOC389993 | <a href="#">XM 372324.1</a> |
| GI_41149227-S | 177.7  | 189.2  | 166.7  | LOC390010 | <a href="#">XM 372331.1</a> |
| GI_41149233-S | 207.1  | 253.5  | 221.3  | LOC387717 | <a href="#">XM 373478.1</a> |
| GI_41149237-S | 117.8  | 113.2  | 103.8  | LOC390009 | <a href="#">XM 372330.1</a> |
| GI_41149241-S | 442.4  | 587.1  | 535    | LOC387630 | <a href="#">XM 373444.1</a> |
| GI_41149249-S | 229.1  | 288.5  | 265    | LOC389931 | <a href="#">XM 374349.1</a> |
| GI_41149304-S | 136.7  | 151.7  | 147.1  | LOC387683 | <a href="#">XM 373461.1</a> |
| GI_41149320-S | 93.9   | 93.2   | 86.9   | LOC387688 | <a href="#">XM 370562.1</a> |
| GI_41149324-S | 100.9  | 109    | 91.6   | LOC387690 | <a href="#">XM 373466.1</a> |
| GI_41149334-S | 213.2  | 228.3  | 205.3  | LOC389972 | <a href="#">XM 372314.1</a> |
| GI_41149336-S | 480.5  | 460.2  | 322.9  | LOC389974 | <a href="#">XM 372315.1</a> |
| GI_41149340-S | 98.3   | 106.1  | 94.7   | LOC389978 | <a href="#">XM 372316.1</a> |
| GI_41149348-S | 86.3   | 92.9   | 92     | LOC387636 | <a href="#">XM 373448.1</a> |
| GI_41149356-S | 143.1  | 144.8  | 132.4  | LOC387640 | <a href="#">XM 370534.1</a> |
| GI_41149361-S | 273.7  | 362.2  | 307.1  | LOC387643 | <a href="#">XM 370537.1</a> |
| GI_41149389-S | 101.4  | 106.4  | 97.6   | LOC387654 | <a href="#">XM 373453.1</a> |
| GI_41149411-S | 115.7  | 122.5  | 133    | LOC387722 | <a href="#">XM 373479.1</a> |
| GI_41149413-S | 122    | 108.6  | 105.1  | LOC387723 | <a href="#">XM 370586.1</a> |
| GI_41149433-S | 143.7  | 133.3  | 133.1  | PLET1     | <a href="#">XM 370657.1</a> |
| GI_41149437-S | 102.3  | 96.5   | 97.8   | LOC387811 | <a href="#">XM 370658.1</a> |
| GI_41149444-S | 221.3  | 258.9  | 228.7  | LOC387814 | <a href="#">XM 373515.1</a> |
| GI_41149461-S | 309    | 367.8  | 323.6  | LOC387817 | <a href="#">XM 373516.1</a> |
| GI_41149467-S | 269.3  | 346.4  | 281.5  | LOC387821 | <a href="#">XM 373518.1</a> |
| GI_41149469-S | 98.1   | 112.6  | 101.4  | LOC387822 | <a href="#">XM 370666.1</a> |
| GI_41149479-S | 110.2  | 100.7  | 111.1  | LOC390253 | <a href="#">XM 372431.1</a> |
| GI_41149489-S | 137.8  | 153.2  | 140.3  | LOC390264 | <a href="#">XM 372436.1</a> |
| GI_41149491-S | 102.2  | 115.5  | 96.7   | LOC390265 | <a href="#">XM 372437.1</a> |
| GI_41149503-S | 89.1   | 84.3   | 87.7   | LOC390275 | <a href="#">XM 372443.1</a> |
| GI_41149547-S | 93.9   | 80.2   | 75     | LOC387787 | <a href="#">XM 370636.1</a> |
| GI_41149557-S | 631.9  | 630.4  | 456.8  | LOC387791 | <a href="#">XM 370639.1</a> |
| GI_41149571-S | 116.9  | 132.4  | 107.5  | LOC387796 | <a href="#">XM 373511.1</a> |
| GI_41149594-S | 91.5   | 116.8  | 99.8   | LOC387736 | <a href="#">XM 373483.1</a> |
| GI_41149596-S | 91.4   | 104.6  | 107.5  | LOC387737 | <a href="#">XM 373484.1</a> |
| GI_41149603-S | 149.9  | 174.2  | 166.2  | LOC387739 | <a href="#">XM 373485.1</a> |
| GI_41149613-S | 86     | 97.2   | 90.7   | LOC387800 | <a href="#">XM 370644.1</a> |
| GI_41149627-S | 4706.1 | 6660.7 | 5726.1 | LOC387805 | <a href="#">XM 370649.1</a> |

|               |        |        |       |           |                             |
|---------------|--------|--------|-------|-----------|-----------------------------|
| GI_41149631-S | 209.5  | 235.4  | 215.9 | LOC390231 | <a href="#">XM 372423.1</a> |
| GI_41149660-S | 107.5  | 113    | 106.9 | LOC387746 | <a href="#">XM 373489.1</a> |
| GI_41149668-S | 322.4  | 307.4  | 257.7 | LOC387749 | <a href="#">XM 370606.1</a> |
| GI_41149683-S | 112.5  | 128.5  | 101.9 | LOC387871 | <a href="#">XM 373539.1</a> |
| GI_41149693-S | 101.8  | 107.4  | 99    | LOC387872 | <a href="#">XM 373540.1</a> |
| GI_41149730-S | 177.1  | 151    | 127.9 | LOC390353 | <a href="#">XM 372474.1</a> |
| GI_41149769-S | 107.6  | 119.2  | 104.8 | LOC387861 | <a href="#">XM 370695.1</a> |
| GI_41149771-S | 150.3  | 168    | 155.6 | LOC387898 | <a href="#">XM 373556.1</a> |
| GI_41149781-S | 150.2  | 168.2  | 151.7 | LOC283314 | <a href="#">XM 373522.1</a> |
| GI_41149799-S | 151.9  | 179.5  | 164.1 | LOC387833 | <a href="#">XM 373524.1</a> |
| GI_41149808-S | 145.8  | 163.7  | 158.5 | LOC387836 | <a href="#">XM 370678.1</a> |
| GI_41149815-S | 101.3  | 113.8  | 103.8 | LOC387838 | <a href="#">XM 373525.1</a> |
| GI_41149833-S | 239    | 285.3  | 259.1 | LOC387895 | <a href="#">XM 373553.1</a> |
| GI_41149841-S | 185.1  | 222.1  | 191.8 | LOC387896 | <a href="#">XM 373554.1</a> |
| GI_41149843-S | 88.7   | 102.4  | 91    | LOC387897 | <a href="#">XM 373555.1</a> |
| GI_41149851-S | 119.8  | 133    | 125   | LOC390369 | <a href="#">XM 372482.1</a> |
| GI_41149855-S | 100.5  | 112.2  | 97.2  | LOC387825 | <a href="#">XM 370668.1</a> |
| GI_41149880-S | 144.4  | 156    | 133.5 | LOC387886 | <a href="#">XM 373548.1</a> |
| GI_41149904-S | 107.8  | 106.2  | 106.4 | LOC387941 | <a href="#">XM 373572.1</a> |
| GI_41149918-S | 101.6  | 100.7  | 104.3 | LOC387946 | <a href="#">XM 373575.1</a> |
| GI_41149935-S | 154.9  | 148.5  | 140.2 | LOC387948 | <a href="#">XM 373577.1</a> |
| GI_41149939-S | 100.8  | 97.6   | 105   | LOC387950 | <a href="#">XM 373578.1</a> |
| GI_41149957-S | 1093.5 | 1244.4 | 1343  | HELSENF1  | <a href="#">XM 370738.1</a> |
| GI_41150010-S | 166.3  | 193.5  | 159.3 | LOC388107 | <a href="#">XM 370849.1</a> |
| GI_41150014-S | 151.1  | 168.2  | 143.1 | LOC388109 | <a href="#">XM 370851.1</a> |
| GI_41150026-S | 97.7   | 118.4  | 102.1 | LOC388114 | <a href="#">XM 373626.1</a> |
| GI_41150032-S | 89.3   | 83.9   | 88.7  | LOC388116 | <a href="#">XM 370856.1</a> |
| GI_41150052-S | 146.8  | 159.4  | 160   | LOC388170 | <a href="#">XM 373646.1</a> |
| GI_41150062-S | 137.4  | 152.8  | 133.3 | LOC390550 | <a href="#">XM 374354.1</a> |
| GI_41150072-S | 105.3  | 108.8  | 101.1 | LOC390547 | <a href="#">XM 372553.1</a> |
| GI_41150092-S | 211.8  | 267.2  | 227   | LOC390644 | <a href="#">XM 372593.1</a> |
| GI_41150100-S | 179.2  | 217.7  | 208.6 | LOC390649 | <a href="#">XM 372597.1</a> |
| GI_41150104-S | 105.5  | 123.2  | 108.9 | LOC390651 | <a href="#">XM 372599.1</a> |
| GI_41150129-S | 103.9  | 107.9  | 99.5  | LOC390530 | <a href="#">XM 372543.1</a> |
| GI_41150137-S | 106    | 108.7  | 108.1 | LOC390537 | <a href="#">XM 372547.1</a> |
| GI_41150141-S | 106.5  | 112    | 118.4 | LOC388077 | <a href="#">XM 370834.1</a> |
| GI_41150145-S | 142.9  | 123.9  | 110.4 | LOC388079 | <a href="#">XM 370836.1</a> |
| GI_41150147-S | 129.3  | 152.8  | 132.1 | LOC390538 | <a href="#">XM 372548.1</a> |
| GI_41150177-S | 114.4  | 133.4  | 110.9 | LOC390625 | <a href="#">XM 372586.1</a> |
| GI_41150239-S | 81.4   | 84.4   | 82.9  | LOC388216 | <a href="#">XM 373667.1</a> |
| GI_41150280-S | 96.9   | 97.2   | 99.3  | LOC388277 | <a href="#">XM 373686.1</a> |
| GI_41150284-S | 690.1  | 807.2  | 694.6 | LOC388278 | <a href="#">XM 373687.1</a> |
| GI_41150286-S | 150.7  | 163.3  | 161.9 | LOC388273 | <a href="#">XM 373683.1</a> |
| GI_41150288-S | 92     | 109.5  | 112.3 | LOC388274 | <a href="#">XM 373684.1</a> |

|               |        |        |        |           |                             |
|---------------|--------|--------|--------|-----------|-----------------------------|
| GI_41150315-S | 95.3   | 106.6  | 91.7   | LOC390751 | <a href="#">XM 374358.1</a> |
| GI_41150317-S | 108.7  | 101.9  | 105    | LOC388205 | <a href="#">XM 370930.1</a> |
| GI_41150319-S | 286.9  | 328.9  | 307    | LOC388206 | <a href="#">XM 373660.1</a> |
| GI_41150323-S | 107.9  | 97.6   | 83.4   | FLJ39639  | <a href="#">XM 370932.1</a> |
| GI_41150361-S | 435.7  | 535    | 482.1  | LOC388291 | <a href="#">XM 373692.1</a> |
| GI_41150381-S | 103.5  | 97.6   | 93.1   | LOC388300 | <a href="#">XM 373695.1</a> |
| GI_41150385-S | 115.1  | 110.3  | 116.6  | LOC388302 | <a href="#">XM 373697.1</a> |
| GI_41150409-S | 101.6  | 121    | 118.8  | LOC388243 | <a href="#">XM 370966.1</a> |
| GI_41150435-S | 93.1   | 103.8  | 91.8   | LOC388258 | <a href="#">XM 370974.1</a> |
| GI_41150451-S | 451    | 485.4  | 425.4  | LOC390690 | <a href="#">XM 372617.1</a> |
| GI_41150461-S | 81.3   | 88     | 83.9   | LOC390697 | <a href="#">XM 372622.1</a> |
| GI_41150483-S | 230.7  | 226    | 203.4  | LOC388272 | <a href="#">XM 370981.1</a> |
| GI_41150491-S | 83.1   | 85.4   | 88.8   | LOC388198 | <a href="#">XM 373655.1</a> |
| GI_41150493-S | 267.2  | 282.4  | 261.3  | LOC388199 | <a href="#">XM 370924.1</a> |
| GI_41150497-S | 1097.4 | 1189   | 926.7  | LOC283951 | <a href="#">XM 370925.1</a> |
| GI_41150499-S | 121.4  | 125    | 125.3  | LOC388201 | <a href="#">XM 373657.1</a> |
| GI_41150548-S | 112.6  | 112.2  | 107.2  | LOC388418 | <a href="#">XM 373748.1</a> |
| GI_41150565-S | 86.6   | 109.9  | 85.9   | LOC388422 | <a href="#">XM 373751.1</a> |
| GI_41150571-S | 114.4  | 116.2  | 115.3  | LOC390812 | <a href="#">XM 372679.1</a> |
| GI_41150577-S | 132.7  | 167.8  | 144.1  | LOC390816 | <a href="#">XM 372682.1</a> |
| GI_41150585-S | 146.2  | 147.2  | 170.8  | LOC388434 | <a href="#">XM 373761.1</a> |
| GI_41150590-S | 136.1  | 136.7  | 108.5  | LOC388318 | <a href="#">XM 373707.1</a> |
| GI_41150622-S | 104.3  | 103.7  | 98.5   | LOC388329 | <a href="#">XM 371012.1</a> |
| GI_41150630-S | 98.6   | 93.6   | 92.1   | LOC388332 | <a href="#">XM 371013.1</a> |
| GI_41150636-S | 102.9  | 110    | 101.2  | LOC388334 | <a href="#">XM 373713.1</a> |
| GI_41150642-S | 99.4   | 124.2  | 97.6   | LOC388336 | <a href="#">XM 371017.1</a> |
| GI_41150677-S | 162.4  | 195.6  | 165.6  | LOC388348 | <a href="#">XM 373718.1</a> |
| GI_41150705-S | 470.6  | 489.8  | 289.8  | LOC388380 | <a href="#">XM 373728.1</a> |
| GI_41150726-S | 969    | 1128.5 | 1147.7 | KIAA0100  | <a href="#">XM 371036.1</a> |
| GI_41150732-S | 92.9   | 102.2  | 95.4   | LOC388366 | <a href="#">XM 373724.1</a> |
| GI_41150754-S | 129.1  | 114    | 123.3  | LOC390788 | <a href="#">XM 372666.1</a> |
| GI_41150760-S | 100.9  | 105.5  | 110    | FLJ20753  | <a href="#">XM 371082.1</a> |
| GI_41150766-S | 213    | 260.4  | 212    | LOC388426 | <a href="#">XM 373754.1</a> |
| GI_41150770-S | 114.7  | 112.3  | 104.4  | LOC388428 | <a href="#">XM 371083.1</a> |
| GI_41150780-S | 143.1  | 147.9  | 132    | LOC388431 | <a href="#">XM 373758.1</a> |
| GI_41150782-S | 700.9  | 676    | 666    | LOC339229 | <a href="#">XM 371085.1</a> |
| GI_41150784-S | 132.6  | 139.2  | 120.2  | LOC388314 | <a href="#">XM 373705.1</a> |
| GI_41150794-S | 175.6  | 161.6  | 166.3  | LOC388353 | <a href="#">XM 371028.1</a> |
| GI_41150802-S | 174    | 200.5  | 161.3  | LOC388357 | <a href="#">XM 371032.1</a> |
| GI_41150868-S | 90.8   | 98.4   | 89.9   | LOC388456 | <a href="#">XM 373771.1</a> |
| GI_41150880-S | 101.7  | 141.9  | 114.9  | LOC388461 | <a href="#">XM 373773.1</a> |
| GI_41150902-S | 283.3  | 350.2  | 329.3  | LOC390821 | <a href="#">XM 374359.1</a> |
| GI_41150914-S | 199.8  | 237.1  | 223.4  | LOC388484 | <a href="#">XM 373783.1</a> |
| GI_41150926-S | 148.4  | 159.4  | 149.9  | LOC390870 | <a href="#">XM 374361.1</a> |

|               |         |        |        |           |                             |
|---------------|---------|--------|--------|-----------|-----------------------------|
| GI_41150934-S | 242.4   | 276.8  | 248    | LOC390864 | <a href="#">XM 372697.1</a> |
| GI_41150942-S | 94.7    | 102.4  | 94.2   | LOC388478 | <a href="#">XM 371118.1</a> |
| GI_41150946-S | 99.1    | 118    | 98.3   | LOC388481 | <a href="#">XM 373780.1</a> |
| GI_41150950-S | 176.8   | 225.7  | 199.8  | LOC390861 | <a href="#">XM 372696.1</a> |
| GI_41150958-S | 101.4   | 110.3  | 98.3   | LOC388527 | <a href="#">XM 373799.1</a> |
| GI_41150960-S | 104.1   | 106.4  | 94.7   | LOC388528 | <a href="#">XM 373800.1</a> |
| GI_41150966-S | 182.8   | 207.6  | 175.1  | LOC147991 | <a href="#">XM 371158.1</a> |
| GI_41150981-S | 108.6   | 124.4  | 116.6  | LOC388535 | <a href="#">XM 373803.1</a> |
| GI_41150990-S | 89.9    | 99.3   | 90.8   | NYD-SP11  | <a href="#">XM 371164.1</a> |
| GI_41150993-S | 96.5    | 102.9  | 84     | LOC388538 | <a href="#">XM 371165.1</a> |
| GI_41151023-S | 225.5   | 243.7  | 221.6  | LOC388488 | <a href="#">XM 371122.1</a> |
| GI_41151028-S | 191.9   | 236.4  | 222.4  | LOC388489 | <a href="#">XM 373786.1</a> |
| GI_41151030-S | 90.4    | 92.5   | 87.4   | LOC388490 | <a href="#">XM 373787.1</a> |
| GI_41151032-S | 118.6   | 117.6  | 116.5  | LOC388491 | <a href="#">XM 371125.1</a> |
| GI_41151055-S | 100.9   | 90     | 99.4   | LOC390875 | <a href="#">XM 372703.1</a> |
| GI_41151057-S | 3585    | 2796.3 | 2220.5 | LOC390876 | <a href="#">XM 372704.1</a> |
| GI_41151072-S | 326.2   | 323.8  | 303.5  | LOC388504 | <a href="#">XM 373793.1</a> |
| GI_41151092-S | 102.9   | 111.6  | 104    | LOC388509 | <a href="#">XM 371142.1</a> |
| GI_41151115-S | 101.3   | 107.9  | 92.3   | LOC388516 | <a href="#">XM 373796.1</a> |
| GI_41151119-S | 124.3   | 125.6  | 133.2  | LOC388517 | <a href="#">XM 371147.1</a> |
| GI_41151129-S | 133.9   | 146.4  | 140.9  | LOC388519 | <a href="#">XM 371151.1</a> |
| GI_41151136-S | 96.7    | 102.4  | 98.8   | LOC388521 | <a href="#">XM 371153.1</a> |
| GI_41151168-S | 120.5   | 136.4  | 144.1  | LOC390892 | <a href="#">XM 372712.1</a> |
| GI_41151174-S | 96.2    | 96.3   | 92.9   | LOC390895 | <a href="#">XM 372715.1</a> |
| GI_41151204-S | 167.4   | 168.9  | 154.4  | LOC284739 | <a href="#">XM 373924.1</a> |
| GI_41151210-S | 111.6   | 117.7  | 118.5  | LOC391262 | <a href="#">XM 372874.1</a> |
| GI_41151223-S | 140.2   | 168    | 147    | LOC388798 | <a href="#">XM 373915.1</a> |
| GI_41151232-S | 151.5   | 162.6  | 151.5  | LOC388800 | <a href="#">XM 373916.1</a> |
| GI_41151236-S | 204.1   | 252    | 215.2  | LOC388801 | <a href="#">XM 373917.1</a> |
| GI_41151269-S | 120.1   | 121.5  | 110.2  | LOC388785 | <a href="#">XM 373905.1</a> |
| GI_41151273-S | 120     | 117.1  | 110.5  | LOC388787 | <a href="#">XM 373907.1</a> |
| GI_41151279-S | 109.4   | 113    | 108.1  | LOC388790 | <a href="#">XM 373909.1</a> |
| GI_41151281-S | 118     | 127.3  | 131    | LOC388791 | <a href="#">XM 373910.1</a> |
| GI_41151283-S | 117.3   | 142.9  | 122.2  | LOC388792 | <a href="#">XM 373911.1</a> |
| GI_41151295-S | 327.3   | 416.1  | 367.3  | LOC388793 | <a href="#">XM 373913.1</a> |
| GI_41151312-S | 172.8   | 155.4  | 154.1  | LOC388815 | <a href="#">XM 373927.1</a> |
| GI_41151326-S | 118.7   | 131.2  | 103.1  | LOC388823 | <a href="#">XM 373931.1</a> |
| GI_41151334-S | 96.2    | 105    | 93.1   | LOC391268 | <a href="#">XM 372875.1</a> |
| GI_41151336-S | 94.1    | 89.6   | 77.5   | LOC391269 | <a href="#">XM 372876.1</a> |
| GI_41151340-S | 11245.5 | 10539  | 8909.4 | LOC391282 | <a href="#">XM 372878.1</a> |
| GI_41151346-S | 101.7   | 104.6  | 99.8   | LOC388831 | <a href="#">XM 373938.1</a> |
| GI_41151350-S | 202.1   | 255.5  | 222.3  | LOC388833 | <a href="#">XM 373940.1</a> |
| GI_41151354-S | 115.7   | 130.3  | 124.8  | C21orf57  | <a href="#">XM 372879.1</a> |
| GI_41151358-S | 109.9   | 117    | 108.9  | LOC388827 | <a href="#">XM 371415.1</a> |

|               |        |        |        |           |                             |                               |            |                        |
|---------------|--------|--------|--------|-----------|-----------------------------|-------------------------------|------------|------------------------|
| GI_41151366-S | 126.9  | 154.5  | 139.8  | LOC388840 | <a href="#">XM_371421.1</a> |                               |            |                        |
| GI_41151368-S | 101.1  | 90.7   | 100.9  | LOC388843 | <a href="#">XM_373943.1</a> |                               |            |                        |
| GI_41151378-S | 105.8  | 97.9   | 90.7   | LOC388847 | <a href="#">XM_371424.1</a> |                               |            |                        |
| GI_41151441-S | 109.6  | 107.4  | 113.7  | LOC388911 | <a href="#">XM_373965.1</a> |                               |            |                        |
| GI_41151454-S | 115.1  | 117.6  | 112.7  | LOC388916 | <a href="#">XM_373969.1</a> |                               |            |                        |
| GI_41151474-S | 2761.1 | 3230.6 | 2425.1 | PLXNB2    | <a href="#">XM_371474.1</a> |                               |            |                        |
| GI_41151506-S | 112.6  | 117.1  | 105.9  | LOC392462 | <a href="#">XM_373345.1</a> |                               |            |                        |
| GI_41151532-S | 99.7   | 94.3   | 95.9   | LOC392468 | <a href="#">XM_373350.1</a> |                               |            |                        |
| GI_41151590-S | 112.7  | 115    | 112    | MGC17403  | <a href="#">XM_372198.1</a> |                               |            |                        |
| GI_41151616-S | 84.8   | 84.7   | 77.4   | LOC392426 | <a href="#">XM_373339.1</a> |                               |            |                        |
| GI_41151626-S | 174.2  | 196.2  | 192.2  | LOC389887 | <a href="#">XM_372247.1</a> |                               |            |                        |
| GI_41151637-S | 108.8  | 109.1  | 94.2   | LOC389892 | <a href="#">XM_372254.1</a> |                               |            |                        |
| GI_41151643-S | 103    | 86.4   | 86     | LOC389896 | <a href="#">XM_374339.1</a> |                               |            |                        |
| GI_41151653-S | 111.7  | 95.3   | 105.6  | LOC392546 | <a href="#">XM_373372.1</a> |                               |            |                        |
| GI_41151663-S | 104.6  | 101.3  | 101.7  | LOC389899 | <a href="#">XM_372258.1</a> |                               |            |                        |
| GI_41151697-S | 99.2   | 95.1   | 78.2   | LOC392533 | <a href="#">XM_373368.1</a> |                               |            |                        |
| GI_41151725-S | 113.9  | 142.1  | 125.1  | LOC392570 | <a href="#">XM_373388.1</a> |                               |            |                        |
| GI_41151743-S | 96.4   | 99.2   | 96.2   | LOC392597 | <a href="#">XM_373399.1</a> |                               |            |                        |
| GI_41151752-S | 110.2  | 121.6  | 117.5  | LOC392583 | <a href="#">XM_374379.1</a> |                               |            |                        |
| GI_41151754-S | 265.5  | 308.8  | 319.9  | LOC392584 | <a href="#">XM_373397.1</a> |                               |            |                        |
| GI_41151802-S | 161.9  | 156.1  | 177.7  | LOC389830 | <a href="#">XM_372186.1</a> |                               |            |                        |
| GI_41151809-S | 185.3  | 214    | 167.3  | LOC389833 | <a href="#">XM_372191.1</a> |                               |            |                        |
| GI_41151823-S | 87.9   | 116.3  | 95.7   | MGC13275  | <a href="#">XM_372194.1</a> |                               |            |                        |
| GI_41152057-S | 176.3  | 202.4  | 187.3  | SLCO2B1   | <a href="#">NM_007256.2</a> | OATPB;OATP-                   | transporte | integral to ion        |
| GI_41152068-S | 112.1  | 119.9  | 106.6  | ZNF-kaiso | <a href="#">NM_006777.3</a> | WUGSC:H_DJ525N14.1            | protein    | nucleus intracellula   |
| GI_41152069-S | 119.1  | 116.4  | 113.9  | ZNF75     | <a href="#">NM_007131.2</a> | D8C6                          | zinc ion   | nucleus regulation     |
| GI_41152071-S | 801    | 817.9  | 714.9  | ZDHHC5    | <a href="#">NM_015457.2</a> | ZNF375;KIAA1748;DKFZP586K0524 | zinc ion   | integral to regulation |
| GI_41152073-I | 106.7  | 126.8  | 103.2  | URB       | <a href="#">NM_199511.1</a> | SSG1                          |            |                        |
| GI_41152077-S | 90.3   | 92.8   | 86.8   | TUBB1     | <a href="#">NM_030773.2</a> | dJ543J19.4                    | GTP        | microtubul microtubul  |
| GI_41152082-S | 1032.9 | 864.8  | 816.3  | TIM14     | <a href="#">NM_145261.2</a> |                               |            |                        |
| GI_41152085-S | 6101.4 | 5333.1 | 5647.6 | SERPINB6  | <a href="#">NM_004568.4</a> | CAP;PI6;PTI                   | protein    | cytosol                |
| GI_41152087-S | 163.7  | 239.3  | 201.3  | PLXNB1    | <a href="#">NM_002673.3</a> | SEP;PLXN5;KIAA0407;PLEXIN-B1  | receptor   | integral to signal     |
| GI_41152088-S | 672.2  | 670.5  | 650.7  | LOC284058 | <a href="#">NM_015443.2</a> | DKFZP727C091                  |            |                        |
| GI_41152089-S | 91.6   | 101    | 90.5   | MAP17     | <a href="#">NM_005764.3</a> | DD96                          |            | integral to oncogene   |
| GI_41152092-I | 160.8  | 175.7  | 161    | KIAA1221  | <a href="#">NM_201269.1</a> | BM-                           |            |                        |
| GI_41152096-S | 1933.3 | 2700.2 | 2221.9 | DXYS155E  | <a href="#">NM_005088.2</a> | XE7;XE7Y;MGC39904             | DNA        | membran regulation     |
| GI_41152102-S | 732.4  | 666.9  | 779.2  | C16orf40  | <a href="#">NM_058192.2</a> | RLUCL;MGC19600                | pseudouri  |                        |
| GI_41152103-S | 179.5  | 179.3  | 193.3  | C10orf26  | <a href="#">NM_017787.3</a> | FLJ20154;FLJ20367             |            |                        |
| GI_41152105-S | 1051.2 | 1313.9 | 988.5  | BMSC-UbP  | <a href="#">NM_032907.3</a> | MGC14421                      |            | membran protein        |
| GI_41152108-S | 120.4  | 126.2  | 115.9  | BGLAP     | <a href="#">NM_199173.2</a> | BGP                           | structural | extracellul skeletal   |
| GI_41152109-S | 101.3  | 119.3  | 103.8  | ADM2      | <a href="#">NM_024866.2</a> | AM2;FLJ21135                  |            |                        |
| GI_41152111-S | 104.2  | 114.6  | 104.9  | AFAR3     | <a href="#">NM_201252.1</a> | AKR7A4                        |            |                        |
| GI_41152113-S | 92.9   | 113.7  | 96.6   | AKR7A3    | <a href="#">NM_012067.2</a> | AFAR2                         | aldo-keto  | cytosol aldehyde       |
| GI_41152145-S | 141.9  | 153.9  | 143.2  | HM74a     | <a href="#">NM_177551.3</a> | HM74b                         | rhodopsin- | integral to G-protein  |

|               |        |        |        |           |                             |                             |          |             |             |
|---------------|--------|--------|--------|-----------|-----------------------------|-----------------------------|----------|-------------|-------------|
| GI_41152234-S | 137    | 129.2  | 125.7  | USP51     | <a href="#">NM_201286.1</a> |                             |          |             |             |
| GI_41152236-S | 667    | 509.8  | 436.9  | MUTED     | <a href="#">NM_201280.1</a> | MU;dJ303A1.3;dJ511E16.2     |          |             |             |
| GI_41152252-S | 2901.9 | 2873   | 2352.7 | GLI4      | <a href="#">NM_138465.3</a> | HKR4                        | DNA      | nucleus     | biological_ |
| GI_41152505-S | 1209.3 | 4812.5 | 2217.4 | PTGFRN    | <a href="#">NM_020440.2</a> | FPRP;EWI-F;CD9P-1;SMAP-     | protein  | integral to | negative    |
| GI_41187875-S | 98.5   | 112.8  | 126.6  | PLXNA2    | <a href="#">XM_372810.1</a> |                             |          |             |             |
| GI_41187884-S | 114.1  | 132.5  | 124.9  | LOC391164 | <a href="#">XM_372814.1</a> |                             |          |             |             |
| GI_41188084-S | 87.8   | 101.7  | 98.2   | LOC388715 | <a href="#">XM_373875.1</a> |                             |          |             |             |
| GI_41188092-S | 154.8  | 177.4  | 155.2  | LOC388717 | <a href="#">XM_373877.1</a> |                             |          |             |             |
| GI_41188100-S | 100.5  | 119.8  | 112.8  | LOC388718 | <a href="#">XM_371329.1</a> |                             |          |             |             |
| GI_41188259-S | 116.5  | 120.6  | 127.1  | LOC388604 | <a href="#">XM_373831.1</a> |                             |          |             |             |
| GI_41188447-S | 97.7   | 110    | 112.7  | LOC388726 | <a href="#">XM_371335.1</a> |                             |          |             |             |
| GI_41188450-S | 633.5  | 1136.7 | 718.2  | LOC388727 | <a href="#">XM_373881.1</a> |                             |          |             |             |
| GI_41188793-S | 136.7  | 110.3  | 106.9  | LOC388706 | <a href="#">XM_373870.1</a> |                             |          |             |             |
| GI_41188811-S | 152.4  | 167.2  | 157.2  | LOC388709 | <a href="#">XM_373871.1</a> |                             |          |             |             |
| GI_41188817-S | 96     | 113.1  | 108.4  | LOC391109 | <a href="#">XM_372797.1</a> |                             |          |             |             |
| GI_41188832-S | 101.4  | 104.2  | 102.3  | LOC391122 | <a href="#">XM_372801.1</a> |                             |          |             |             |
| GI_41190370-S | 524.6  | 628.4  | 506.4  | LOC388940 | <a href="#">XM_373980.1</a> |                             |          |             |             |
| GI_41190399-S | 71.7   | 95     | 93     | LOC388947 | <a href="#">XM_373984.1</a> |                             |          |             |             |
| GI_41190411-S | 268.8  | 326.8  | 286.3  | LOC388950 | <a href="#">XM_371493.1</a> |                             |          |             |             |
| GI_41190413-S | 118.7  | 113.2  | 114.3  | LOC388951 | <a href="#">XM_371494.1</a> |                             |          |             |             |
| GI_41190418-S | 864.4  | 844    | 728.5  | LOC388952 | <a href="#">XM_373986.1</a> |                             |          |             |             |
| GI_41190460-S | 101.9  | 109.9  | 99.9   | LOC388960 | <a href="#">XM_371500.1</a> |                             |          |             |             |
| GI_41190479-S | 484.6  | 612.4  | 588    | LOC388967 | <a href="#">XM_373992.1</a> |                             |          |             |             |
| GI_41190543-S | 138.7  | 162.2  | 134.2  | LOC391392 | <a href="#">XM_372933.1</a> |                             |          |             |             |
| GI_41190797-S | 111.1  | 113.2  | 94     | UNQ2430   | <a href="#">XM_371540.1</a> |                             |          |             |             |
| GI_41190805-S | 112.9  | 108.9  | 90.9   | LOC391407 | <a href="#">XM_372942.1</a> |                             |          |             |             |
| GI_41191410-S | 604.3  | 615.5  | 488.5  | LOC375295 | <a href="#">XM_374020.1</a> |                             |          |             |             |
| GI_41191505-S | 101.2  | 95.8   | 90     | LOC391456 | <a href="#">XM_372965.1</a> |                             |          |             |             |
| GI_41193262-S | 108.5  | 121.1  | 126.2  | LOC389118 | <a href="#">XM_371639.1</a> |                             |          |             |             |
| GI_41193290-S | 102.4  | 119.9  | 110.5  | LOC391509 | <a href="#">XM_372984.1</a> |                             |          |             |             |
| GI_41193302-S | 96.6   | 102.7  | 86.9   | LOC391532 | <a href="#">XM_372988.1</a> |                             |          |             |             |
| GI_41194212-S | 104.7  | 105.9  | 93.6   | LOC389186 | <a href="#">XM_374068.1</a> |                             |          |             |             |
| GI_41194251-S | 107.1  | 110.3  | 119.2  | LOC391594 | <a href="#">XM_373004.1</a> |                             |          |             |             |
| GI_41195115-S | 79.3   | 84     | 79.6   | LOC391701 | <a href="#">XM_373033.1</a> |                             |          |             |             |
| GI_41195532-S | 102.3  | 104.2  | 109.9  | LOC391733 | <a href="#">XM_373053.1</a> |                             |          |             |             |
| GI_41196201-S | 114.4  | 118.9  | 108.2  | LOC389426 | <a href="#">XM_374181.1</a> |                             |          |             |             |
| GI_41197088-S | 98.5   | 94.9   | 85     | HLA-DQA1  | <a href="#">XM_371812.1</a> | DQA1;HLA-DQ;CELIAC1;HLA-DQA | class II | integral to | pathogene   |
| GI_41197090-S | 130.2  | 133.9  | 129.4  | LOC389380 | <a href="#">XM_374164.1</a> |                             |          |             |             |
| GI_41197095-S | 125.5  | 150.9  | 131.2  | LOC389381 | <a href="#">XM_374165.1</a> |                             |          |             |             |
| GI_41197099-S | 138.4  | 139.1  | 126    | LOC389383 | <a href="#">XM_371815.1</a> |                             |          |             |             |
| GI_41197105-S | 238.7  | 298.2  | 288.1  | LOC389385 | <a href="#">XM_371817.1</a> |                             |          |             |             |
| GI_41197110-S | 2797.8 | 2215.6 | 1436.5 | LOC389387 | <a href="#">XM_371819.1</a> |                             |          |             |             |
| GI_41197134-S | 299.5  | 377.4  | 349.4  | LOC389393 | <a href="#">XM_374169.1</a> |                             |          |             |             |
| GI_41197144-S | 340    | 400.8  | 371.1  | LOC389396 | <a href="#">XM_371825.1</a> |                             |          |             |             |

|               |       |       |       |           |                             |
|---------------|-------|-------|-------|-----------|-----------------------------|
| GI_41197149-S | 123.3 | 134.6 | 125.6 | LOC389399 | <a href="#">XM 374171.1</a> |
| GI_41197153-S | 110.2 | 117.4 | 119.5 | LOC389400 | <a href="#">XM 371826.1</a> |
| GI_41199227-S | 143.1 | 163.5 | 162.5 | LOC389556 | <a href="#">XM 374232.1</a> |
| GI_41199294-S | 82.7  | 84.6  | 91.3  | LOC392084 | <a href="#">XM 373180.1</a> |
| GI_41199582-S | 430.1 | 531.3 | 471.5 | LOC389816 | <a href="#">XM 372161.1</a> |
| GI_41199585-S | 113.3 | 132.9 | 108.6 | LOC389817 | <a href="#">XM 372162.1</a> |
| GI_41200333-S | 92.3  | 110   | 114.9 | LOC387776 | <a href="#">XM 373502.1</a> |
| GI_41200338-S | 98.8  | 86.3  | 90.3  | LOC387777 | <a href="#">XM 373503.1</a> |
| GI_41200362-S | 233.1 | 302.2 | 248.8 | LOC387783 | <a href="#">XM 373505.1</a> |
| GI_41200377-S | 93.1  | 81.7  | 88.2  | LOC390137 | <a href="#">XM 372384.1</a> |
| GI_41200379-S | 131.9 | 168.6 | 150   | LOC390138 | <a href="#">XM 372385.1</a> |
| GI_41200391-S | 96    | 102.3 | 95.9  | OR5L2     | <a href="#">XM 372387.1</a> |
| GI_41200394-S | 103.8 | 106.8 | 101.3 | LOC390144 | <a href="#">XM 372388.1</a> |
| GI_41200409-S | 110.9 | 118.3 | 108.1 | LOC390152 | <a href="#">XM 372391.1</a> |
| GI_41200424-S | 106.7 | 122.8 | 112.4 | LOC390157 | <a href="#">XM 372395.1</a> |
| GI_41200427-S | 139.8 | 127.6 | 122.8 | LOC390158 | <a href="#">XM 372396.1</a> |
| GI_41200431-S | 143.2 | 160.5 | 144   | LOC390162 | <a href="#">XM 372397.1</a> |
| GI_41200448-S | 159.3 | 194.2 | 164.9 | LOC390169 | <a href="#">XM 372402.1</a> |
| GI_41200470-S | 99.3  | 103.6 | 99.9  | LOC390186 | <a href="#">XM 372406.1</a> |
| GI_41200477-S | 91.8  | 110.9 | 96.4  | LOC390191 | <a href="#">XM 372409.1</a> |
| GI_41200489-S | 91.5  | 102.2 | 87.2  | LOC390195 | <a href="#">XM 372411.1</a> |
| GI_41200497-S | 96.6  | 114   | 99.8  | LOC390199 | <a href="#">XM 372413.1</a> |
| GI_41200501-S | 103.2 | 90.6  | 92.5  | LOC390204 | <a href="#">XM 372415.1</a> |
| GI_41200870-S | 255.3 | 289.2 | 265.1 | LOC387757 | <a href="#">XM 373492.1</a> |
| GI_41200889-S | 146.3 | 171.1 | 149   | LOC387760 | <a href="#">XM 373494.1</a> |
| GI_41200900-S | 89.2  | 113.8 | 95.9  | LOC387762 | <a href="#">XM 373496.1</a> |
| GI_41200910-S | 156   | 205.3 | 190   | LOC387765 | <a href="#">XM 373499.1</a> |
| GI_41200912-S | 306.3 | 364.5 | 353.1 | FLJ20294  | <a href="#">XM 370618.1</a> |
| GI_41200935-S | 101.8 | 120.8 | 112   | LOC390034 | <a href="#">XM 372346.1</a> |
| GI_41200947-S | 114.4 | 147.2 | 126.9 | LOC390039 | <a href="#">XM 372350.1</a> |
| GI_41200959-S | 109.2 | 108.3 | 106.9 | LOC390054 | <a href="#">XM 372352.1</a> |
| GI_41200962-S | 86.8  | 85.1  | 85.6  | LOC390058 | <a href="#">XM 372353.1</a> |
| GI_41200965-S | 91.3  | 103.8 | 94.7  | LOC390059 | <a href="#">XM 372354.1</a> |
| GI_41200969-S | 82.6  | 90.1  | 85.6  | LOC390063 | <a href="#">XM 372356.1</a> |
| GI_41200974-S | 117.4 | 115.8 | 121.5 | LOC390065 | <a href="#">XM 372358.1</a> |
| GI_41200976-S | 645.3 | 779.6 | 683.8 | LOC390066 | <a href="#">XM 372359.1</a> |
| GI_41200979-S | 152.2 | 166   | 161.1 | LOC390067 | <a href="#">XM 372360.1</a> |
| GI_41200985-S | 127.6 | 130.4 | 125.3 | LOC390073 | <a href="#">XM 372362.1</a> |
| GI_41200997-S | 116.1 | 103.6 | 117.7 | LOC390079 | <a href="#">XM 372367.1</a> |
| GI_41201006-S | 145.1 | 159.1 | 144.1 | LOC390084 | <a href="#">XM 372371.1</a> |
| GI_41201018-S | 114.7 | 112.7 | 94    | LOC390093 | <a href="#">XM 372373.1</a> |
| GI_41201031-S | 120.3 | 133.2 | 125.8 | LOC390110 | <a href="#">XM 372375.1</a> |
| GI_41201035-S | 342   | 350.7 | 305.8 | LOC390113 | <a href="#">XM 372376.1</a> |
| GI_41201706-S | 122.4 | 117.1 | 105.7 | LOC387863 | <a href="#">XM 373534.1</a> |

|               |        |        |        |           |                             |
|---------------|--------|--------|--------|-----------|-----------------------------|
| GI_41201711-S | 133.1  | 157.1  | 150    | FLJ34236  | <a href="#">XM 370696.1</a> |
| GI_41201751-S | 113.1  | 121.7  | 122.4  | LOC390310 | <a href="#">XM 372456.1</a> |
| GI_41201767-S | 114.1  | 116    | 128    | LOC390323 | <a href="#">XM 372460.1</a> |
| GI_41201774-S | 100.3  | 101.4  | 100.4  | LOC390326 | <a href="#">XM 372463.1</a> |
| GI_41201777-S | 138.7  | 154    | 129.9  | LOC390327 | <a href="#">XM 372464.1</a> |
| GI_41201795-S | 150.4  | 148.1  | 151.7  | LOC390343 | <a href="#">XM 372470.1</a> |
| GI_41202045-S | 9338.8 | 9273.8 | 7311.4 | LOC387845 | <a href="#">XM 370684.1</a> |
| GI_41202063-S | 188.5  | 191.5  | 156.7  | LOC387849 | <a href="#">XM 370686.1</a> |
| GI_41202068-S | 114.8  | 118.5  | 98.1   | LOC387850 | <a href="#">XM 370687.1</a> |
| GI_41202077-S | 98.9   | 105.6  | 96.8   | LOC390288 | <a href="#">XM 372449.1</a> |
| GI_41202079-S | 91.4   | 106.7  | 98.5   | LOC390290 | <a href="#">XM 372450.1</a> |
| GI_41202572-S | 105.8  | 100.3  | 107.5  | LOC387901 | <a href="#">XM 373557.1</a> |
| GI_41202576-S | 83.7   | 96.5   | 91.7   | LOC387903 | <a href="#">XM 373558.1</a> |
| GI_41202581-S | 116.3  | 123.8  | 101.7  | LOC387905 | <a href="#">XM 373559.1</a> |
| GI_41202591-S | 105.4  | 91.7   | 89.2   | LOC387910 | <a href="#">XM 373560.1</a> |
| GI_41202601-S | 330.7  | 419.3  | 384.4  | LOC387914 | <a href="#">XM 370718.1</a> |
| GI_41202613-S | 82.5   | 93.6   | 88.9   | LOC387918 | <a href="#">XM 373563.1</a> |
| GI_41202624-S | 78.9   | 77.6   | 85.4   | LOC387922 | <a href="#">XM 370723.1</a> |
| GI_41202645-S | 150.3  | 165.9  | 159.4  | LOC387927 | <a href="#">XM 370726.1</a> |
| GI_41202691-S | 115.5  | 124    | 118    | LOC390377 | <a href="#">XM 372486.1</a> |
| GI_41202705-S | 89     | 98.9   | 100.7  | LOC390393 | <a href="#">XM 372491.1</a> |
| GI_41203719-S | 110.5  | 131.5  | 123.1  | LOC387993 | <a href="#">XM 373595.1</a> |
| GI_41203727-S | 174.2  | 189.9  | 166.1  | LOC387994 | <a href="#">XM 373596.1</a> |
| GI_41203742-S | 105.1  | 109.3  | 102.5  | PAPLN     | <a href="#">XM 370765.1</a> |
| GI_41203785-S | 188    | 223.6  | 190.9  | LOC388006 | <a href="#">XM 373602.1</a> |
| GI_41203788-S | 161.6  | 189.8  | 175.7  | C14orf86  | <a href="#">XM 373603.1</a> |
| GI_41203790-S | 152.4  | 187.3  | 168.8  | LOC388007 | <a href="#">XM 370772.1</a> |
| GI_41203818-S | 206.4  | 245.8  | 243.2  | LOC388017 | <a href="#">XM 373609.1</a> |
| GI_41203826-S | 349.1  | 449.9  | 374.1  | LOC388019 | <a href="#">XM 373611.1</a> |
| GI_41203834-S | 116.9  | 107.3  | 110.7  | LOC388021 | <a href="#">XM 370778.1</a> |
| GI_41203856-S | 99.1   | 103.4  | 94.4   | C14orf81  | <a href="#">XM 370785.1</a> |
| GI_41203866-S | 186.5  | 204.6  | 167.8  | LOC390431 | <a href="#">XM 372501.1</a> |
| GI_41203872-S | 115.5  | 142.1  | 155.3  | LOC390432 | <a href="#">XM 372502.1</a> |
| GI_41203875-S | 88.1   | 89.5   | 87.3   | LOC390433 | <a href="#">XM 372503.1</a> |
| GI_41203882-S | 145    | 173.3  | 157.4  | LOC390439 | <a href="#">XM 372506.1</a> |
| GI_41203885-S | 223.3  | 283.2  | 233.5  | LOC390442 | <a href="#">XM 372507.1</a> |
| GI_41203897-S | 107.8  | 113.6  | 114.1  | LOC390468 | <a href="#">XM 372522.1</a> |
| GI_41203903-S | 103.4  | 115.3  | 120.1  | LOC390485 | <a href="#">XM 372525.1</a> |
| GI_41204880-S | 198.5  | 221.6  | 208.2  | LOC388118 | <a href="#">XM 370858.1</a> |
| GI_41204903-S | 170.5  | 242    | 188.7  | ATP8B4    | <a href="#">XM 370863.1</a> |
| GI_41204905-S | 172.6  | 156.3  | 98.7   | LOC388121 | <a href="#">XM 370864.1</a> |
| GI_41204912-S | 83.4   | 91.5   | 87.9   | LOC388123 | <a href="#">XM 373628.1</a> |
| GI_41204930-S | 122.2  | 131.7  | 113.1  | LOC388125 | <a href="#">XM 370868.1</a> |
| GI_41204932-S | 97.1   | 97.5   | 94.8   | LOC388126 | <a href="#">XM 373630.1</a> |



|               |       |        |       |           |                             |
|---------------|-------|--------|-------|-----------|-----------------------------|
| GI_41204956-S | 124.5 | 146    | 121.8 | LOC388134 | <a href="#">XM 373633.1</a> |
| GI_41204969-S | 97.7  | 105    | 110.8 | LOC388136 | <a href="#">XM 373634.1</a> |
| GI_41204979-S | 900.1 | 1172.8 | 673.1 | KIAA2002  | <a href="#">XM 370878.1</a> |
| GI_41204983-S | 151.7 | 176.4  | 158.5 | LOC388141 | <a href="#">XM 373637.1</a> |
| GI_41205014-S | 115.2 | 126.8  | 121.5 | LOC390558 | <a href="#">XM 372559.1</a> |
| GI_41205021-S | 110.2 | 119.1  | 114   | LOC390564 | <a href="#">XM 372562.1</a> |
| GI_41205031-S | 187.5 | 230.6  | 224.1 | LOC390568 | <a href="#">XM 374356.1</a> |
| GI_41205033-S | 97.1  | 94.2   | 90.9  | LOC390569 | <a href="#">XM 372565.1</a> |
| GI_41205035-S | 145   | 155.1  | 135.6 | LOC390570 | <a href="#">XM 372566.1</a> |
| GI_41205051-S | 129.1 | 136    | 122   | LOC390594 | <a href="#">XM 372573.1</a> |
| GI_41205056-S | 98.8  | 104    | 102.6 | LOC390596 | <a href="#">XM 372575.1</a> |
| GI_41205075-S | 99.5  | 100.8  | 99.2  | LOC390613 | <a href="#">XM 372583.1</a> |
| GI_41205080-S | 119.9 | 136.7  | 120.4 | LOC390623 | <a href="#">XM 372585.1</a> |
| GI_41205607-S | 106   | 122.4  | 112.5 | LOC388175 | <a href="#">XM 370906.1</a> |
| GI_41205617-S | 104.2 | 107.5  | 120.2 | LOC388177 | <a href="#">XM 370909.1</a> |
| GI_41205627-S | 142   | 138.4  | 136.6 | LOC390633 | <a href="#">XM 372588.1</a> |
| GI_41205631-S | 105.8 | 131    | 119.6 | LOC390638 | <a href="#">XM 372591.1</a> |
| GI_41206115-S | 153.7 | 163.9  | 152.1 | ERN2      | <a href="#">XM 370947.1</a> |
| GI_41206117-S | 145.5 | 204.7  | 173.7 | LOC388227 | <a href="#">XM 373670.1</a> |
| GI_41206133-S | 116.1 | 128    | 110.6 | LOC388231 | <a href="#">XM 373671.1</a> |
| GI_41206146-S | 103.8 | 118.1  | 114   | LOC390680 | <a href="#">XM 372611.1</a> |
| GI_41206154-S | 112.1 | 118.5  | 104.7 | LOC390683 | <a href="#">XM 372614.1</a> |
| GI_41206406-S | 287.3 | 245.7  | 207.3 | LOC388279 | <a href="#">XM 373688.1</a> |
| GI_41206408-S | 121.4 | 116.2  | 129.2 | LOC388281 | <a href="#">XM 373689.1</a> |
| GI_41206439-S | 90.6  | 93.7   | 81.3  | LOC388288 | <a href="#">XM 370986.1</a> |
| GI_41206445-S | 199.3 | 250.4  | 230.2 | LOC388289 | <a href="#">XM 370987.1</a> |
| GI_41206449-S | 121.7 | 139.9  | 133.2 | LOC390732 | <a href="#">XM 372639.1</a> |
| GI_41206830-S | 110.3 | 127.1  | 115.4 | LOC390792 | <a href="#">XM 372669.1</a> |
| GI_41207734-S | 101.6 | 98.3   | 105.1 | LOC390845 | <a href="#">XM 372692.1</a> |
| GI_41208718-S | 197.5 | 192.3  | 146.8 | ZNF283    | <a href="#">XM 371174.1</a> |
| GI_41208736-S | 195.8 | 246.7  | 210.5 | LOC388550 | <a href="#">XM 371176.1</a> |
| GI_41208742-S | 115.4 | 134.4  | 130.4 | LOC388552 | <a href="#">XM 371178.1</a> |
| GI_41208805-S | 111.3 | 107.2  | 109   | LOC162967 | <a href="#">XM 371190.1</a> |
| GI_41208814-S | 97.8  | 88.9   | 86.5  | LOC388561 | <a href="#">XM 371192.1</a> |
| GI_41208825-S | 152.4 | 174.2  | 171.3 | LOC388563 | <a href="#">XM 373811.1</a> |
| GI_41208836-S | 117   | 128.5  | 130.8 | LOC388565 | <a href="#">XM 371197.1</a> |
| GI_41208856-S | 98.5  | 86.6   | 83    | LOC388567 | <a href="#">XM 371200.1</a> |
| GI_41208888-S | 87.1  | 74.6   | 85.8  | LOC390939 | <a href="#">XM 372731.1</a> |
| GI_41208923-S | 155.1 | 176.6  | 148.6 | LOC390971 | <a href="#">XM 372746.1</a> |
| GI_41208928-S | 90.9  | 107.4  | 86.6  | LOC390974 | <a href="#">XM 372748.1</a> |
| GI_41208930-S | 120.7 | 135.3  | 134   | LOC390975 | <a href="#">XM 372749.1</a> |
| GI_41208933-S | 134.2 | 116.9  | 114.7 | LOC390976 | <a href="#">XM 372750.1</a> |
| GI_41208936-S | 92.3  | 109.2  | 100.6 | LOC390977 | <a href="#">XM 372751.1</a> |
| GI_41208941-S | 126.9 | 132.2  | 132.8 | LOC390980 | <a href="#">XM 372753.1</a> |

|               |        |        |        |             |                             |                             |            |             |              |
|---------------|--------|--------|--------|-------------|-----------------------------|-----------------------------|------------|-------------|--------------|
| GI_41209284-S | 392.8  | 464.9  | 414.1  | LOC391241   | <a href="#">XM_372864.1</a> |                             |            |             |              |
| GI_41209794-S | 153.4  | 197.5  | 296    | LOC150221   | <a href="#">XM_036942.3</a> |                             |            |             |              |
| GI_41209810-S | 106.4  | 119.3  | 106.3  | LOC388885   | <a href="#">XM_373949.1</a> |                             |            |             |              |
| GI_41209837-S | 108.8  | 100.2  | 99.2   | LOC388890   | <a href="#">XM_373953.1</a> |                             |            |             |              |
| GI_41209858-S | 84.8   | 89.4   | 79.1   | LOC388897   | <a href="#">XM_373957.1</a> |                             |            |             |              |
| GI_41209895-S | 227.3  | 250.9  | 230.7  | LOC391304   | <a href="#">XM_372892.1</a> |                             |            |             |              |
| GI_41209901-S | 139    | 151.1  | 141.8  | LOC391306   | <a href="#">XM_372894.1</a> |                             |            |             |              |
| GI_41209910-S | 143.2  | 188.9  | 155.7  | LOC391328   | <a href="#">XM_372901.1</a> |                             |            |             |              |
| GI_41210305-S | 97.2   | 118.9  | 101.3  | LOC392517   | <a href="#">XM_373362.1</a> |                             |            |             |              |
| GI_41222100-S | 1515.8 | 1754.5 | 2234.1 | KIAA0877    | <a href="#">XM_371891.1</a> |                             |            |             |              |
| GI_41222114-S | 413.8  | 349.4  | 269.5  | DKFZp761121 | <a href="#">XM_371897.1</a> |                             |            |             |              |
| GI_41222645-S | 146.6  | 167.1  | 157.4  | LOC389790   | <a href="#">XM_372141.1</a> |                             |            |             |              |
| GI_41222683-S | 237.9  | 311.2  | 297.6  | LOC392379   | <a href="#">XM_373309.1</a> |                             |            |             |              |
| GI_41222688-S | 148.7  | 159.7  | 149.8  | LOC392382   | <a href="#">XM_373311.1</a> |                             |            |             |              |
| GI_41222707-S | 141.1  | 156.5  | 141.7  | LOC392389   | <a href="#">XM_373314.1</a> |                             |            |             |              |
| GI_41222827-S | 275    | 360.5  | 281    | LOC388399   | <a href="#">XM_371066.1</a> |                             |            |             |              |
| GI_41222833-S | 91.2   | 104.6  | 98.2   | LOC388402   | <a href="#">XM_371069.1</a> |                             |            |             |              |
| GI_41222839-S | 94.2   | 123.1  | 103.4  | LOC388403   | <a href="#">XM_371070.1</a> |                             |            |             |              |
| GI_41222851-S | 671.9  | 662.6  | 829.5  | DKFZP564D1  | <a href="#">XM_371074.1</a> |                             |            |             |              |
| GI_41281366-S | 450.2  | 697.3  | 878.4  | EXTL3       | <a href="#">NM_001440.2</a> | REG;RPR;EXTR1;KIAA0519      | tumor      | endoplas    | cell growth  |
| GI_41281370-S | 1853.5 | 1521.3 | 1260.3 | FDPS        | <a href="#">NM_002004.2</a> | FPS                         | geranyltra |             | cholesterol  |
| GI_41281375-S | 517.1  | 565.7  | 597.5  | USP8        | <a href="#">NM_005154.2</a> | UBPY;HumORF8;KIAA0055       | ubiquitin- |             | deubiquiti   |
| GI_41281383-S | 8488.5 | 8114.8 | 5612   | NEDD5       | <a href="#">NM_004404.2</a> | DIFF6;SEPT2;hNedd5;KIAA0158 | GTPase     | contractile | cytokinesi   |
| GI_41281385-S | 124    | 170.5  | 113.7  | HA-1        | <a href="#">NM_012292.1</a> | HLA-HA1;KIAA0223            |            |             | intracellula |
| GI_41281388-S | 279.1  | 185.4  | 97.5   | NRCAM       | <a href="#">NM_005010.2</a> | KIAA0343                    | tumor      | integral to | cell         |
| GI_41281392-S | 397.4  | 497    | 452    | SETDB1      | <a href="#">NM_012432.2</a> | ESET;KG1T;KIAA0067          | methyltran | kinesin     | oncogene     |
| GI_41281397-S | 730.8  | 812.4  | 735.7  | SHOC2       | <a href="#">NM_007373.2</a> | SOC2;SUR8;SOC-2;SUR-        | molecular  | cytoplasm   | FGF          |
| GI_41281402-S | 89.5   | 87.1   | 75.8   | RAPGEF5     | <a href="#">NM_012294.2</a> | GFR;REPAC;MR-GEF;KIAA0277   | guanyl-    | nucleus     | small        |
| GI_41281407-S | 849.2  | 991.1  | 724.9  | SH2BP1      | <a href="#">NM_014633.2</a> | TSBP;p150TSP;KIAA0155       | DNA        | nucleus     | regulation   |
| GI_41281417-S | 1694.9 | 1486   | 1209.7 | MICAL2      | <a href="#">NM_014632.2</a> | KIAA0750                    | monooxyg   |             | electron     |
| GI_41281419-S | 391.8  | 321.5  | 446.1  | KIAA0377    | <a href="#">NM_014659.2</a> |                             | acid       |             |              |
| GI_41281422-S | 1300.9 | 1463.4 | 1125.8 | KIAA0372    | <a href="#">NM_014639.2</a> |                             |            |             | protein      |
| GI_41281428-S | 4720.7 | 5257.1 | 5192   | BZW1        | <a href="#">NM_014670.2</a> | BZAP45;KIAA0005             |            |             |              |
| GI_41281432-S | 222.7  | 269    | 230.2  | ECE2        | <a href="#">NM_014693.2</a> | KIAA0604                    | zinc ion   | integral to | regulation   |
| GI_41281436-S | 1757.3 | 1629.7 | 1629.8 | KIAA0095    | <a href="#">NM_014669.2</a> | MGC21106                    |            |             |              |
| GI_41281440-S | 151.4  | 176.9  | 182.2  | KIAA0296    | <a href="#">NM_014699.2</a> |                             | DNA        | nucleus     | regulation   |
| GI_41281443-S | 146.4  | 132.4  | 119    | RIMS2       | <a href="#">NM_014677.2</a> | OBOE;RIM2;RAB3IP3;KIAA0751  | protein    |             | intracellula |
| GI_41281446-S | 343.1  | 433.1  | 347.4  | KIAA0590    | <a href="#">NM_014714.2</a> |                             |            |             |              |
| GI_41281449-S | 286.4  | 340.6  | 314.7  | KIAA0605    | <a href="#">NM_014694.2</a> |                             |            |             |              |
| GI_41281452-S | 444.9  | 466.6  | 446.8  | SLK         | <a href="#">NM_014720.2</a> | KIAA0204                    | nuclease   |             | nucleotide-  |
| GI_41281455-S | 336.3  | 376.4  | 329.8  | Rab11-FIP3  | <a href="#">NM_014700.2</a> | KIAA0665                    | calcium    |             |              |
| GI_41281456-S | 249.7  | 322.5  | 303.4  | KIAA0247    | <a href="#">NM_014734.2</a> |                             |            | integral to |              |
| GI_41281459-S | 238.1  | 285.2  | 227.9  | CENTB1      | <a href="#">NM_014716.2</a> | ACAP1;KIAA0050              | phospholi  | nucleus     | intracellula |
| GI_41281461-S | 289.5  | 367    | 382.1  | KIAA0652    | <a href="#">NM_014741.2</a> |                             |            |             |              |

|               |        |        |        |          |                             |                                     |            |              |             |
|---------------|--------|--------|--------|----------|-----------------------------|-------------------------------------|------------|--------------|-------------|
| GI_41281465-S | 119.4  | 117.3  | 109.4  | ZFYVE16  | <a href="#">NM_014733.2</a> | ENDOFIN;KIAA0305                    | zinc ion   |              |             |
| GI_41281468-S | 287.3  | 303.2  | 309.6  | KIAA0586 | <a href="#">NM_014749.2</a> |                                     |            |              |             |
| GI_41281472-S | 234.3  | 257    | 276.9  | KIAA0195 | <a href="#">NM_014738.2</a> |                                     | ATP        | membran      | cation      |
| GI_41281475-S | 98.8   | 100.6  | 93.4   | PHYHIP   | <a href="#">NM_014759.2</a> | PAHX-AP;KIAA0273                    |            |              |             |
| GI_41281478-S | 1588.6 | 1807.8 | 2308.9 | TM9SF4   | <a href="#">NM_014742.2</a> | KIAA0255                            | transporte | integral to  | transport   |
| GI_41281480-S | 1368   | 1874.7 | 2430.7 | DAZAP2   | <a href="#">NM_014764.2</a> | MGC766;KIAA0058;MGC14319            | transporte | membran      | transport   |
| GI_41281482-S | 2045.4 | 1896.6 | 1914.5 | BMS1L    | <a href="#">NM_014753.2</a> | KIAA0187                            | ATP        | nucleus      | ribosome    |
| GI_41281484-S | 536.8  | 412.9  | 425    | KIAA0141 | <a href="#">NM_014773.2</a> |                                     |            |              |             |
| GI_41281488-S | 2120.2 | 2044.7 | 1899.6 | KIAA0174 | <a href="#">NM_014761.2</a> |                                     |            |              |             |
| GI_41281490-S | 759.8  | 806.2  | 995.1  | MELK     | <a href="#">NM_014791.2</a> | KIAA0175                            | protein-   |              | protein     |
| GI_41281493-S | 252.7  | 313.3  | 268.5  | CENTG1   | <a href="#">NM_014770.2</a> | PIKE;AGAP2;GGAP2;KIAA0167           | GTPase     | nucleus      | signal      |
| GI_41281495-S | 232.1  | 226.9  | 199.9  | THRAP4   | <a href="#">NM_014815.2</a> | DRIP100;TRAP100;KIAA0130            | ATP        | mediator     | regulation  |
| GI_41281508-S | 139.7  | 121    | 114.3  | SV2B     | <a href="#">NM_014848.2</a> | HsT19680;KIAA0735                   | transporte | integral to  | transport   |
| GI_41281511-S | 2470.9 | 2164.2 | 1891.1 | PJA2     | <a href="#">NM_014819.2</a> | RNF131;KIAA0438;Neurodap1           | N-         |              | DNA         |
| GI_41281514-S | 353.5  | 645.9  | 425    | ARNT2    | <a href="#">NM_014862.2</a> | KIAA0307                            | aryl       | nucleus      | response    |
| GI_41281517-S | 1860.8 | 2233.1 | 2357.1 | KIAA0196 | <a href="#">NM_014846.2</a> |                                     |            |              |             |
| GI_41281520-S | 856.1  | 1056.3 | 1020.9 | CNAP1    | <a href="#">NM_014865.2</a> | KIAA0159                            | histone    | nucleus      | mitotic     |
| GI_41281526-S | 634.4  | 767.4  | 644.6  | USP52    | <a href="#">NM_014871.2</a> | PAN2;KIAA0710                       | exonuclea  | intracellula | ubiquitin-  |
| GI_41281529-S | 1796.6 | 2223.7 | 2565.2 | FAM20B   | <a href="#">NM_014864.2</a> | KIAA0475                            |            |              |             |
| GI_41281534-S | 90.8   | 84.2   | 91.3   | GPR105   | <a href="#">NM_014879.2</a> | KIAA0001                            | rhodopsin- | integral to  | G-protein   |
| GI_41281538-S | 1783.1 | 1603.8 | 892.6  | RHOBTB3  | <a href="#">NM_014899.2</a> | KIAA0878                            | Rho small  | intracellula | biological_ |
| GI_41281541-S | 381    | 240.5  | 265.1  | COBLL1   | <a href="#">NM_014900.2</a> | KIAA0977                            |            |              |             |
| GI_41281547-S | 830.4  | 1010.8 | 1324.9 | TMEM15   | <a href="#">NM_014908.2</a> | KIAA1094                            |            | integral to  |             |
| GI_41281554-S | 179.1  | 165.9  | 215    | CENTG2   | <a href="#">NM_014914.2</a> | AGAP1;GGAP1;KIAA1099                | small      | nucleus      | small       |
| GI_41281556-S | 587.1  | 720.9  | 727.4  | LPHN1    | <a href="#">NM_014921.2</a> | LEC2;CIRL1;FLJ11939;KIAA0821        | sugar      | integral to  | neuropepti  |
| GI_41281560-S | 6053.8 | 6946.3 | 6336   | CLSTN1   | <a href="#">NM_014944.2</a> | CSTN1;KIAA0911                      | calcium    | integral to  | homophili   |
| GI_41281563-S | 213.8  | 240.9  | 233    | KIAA0982 | <a href="#">NM_014023.2</a> |                                     |            |              |             |
| GI_41281570-S | 213.9  | 159.8  | 177.3  | SSX2IP   | <a href="#">NM_014021.2</a> | ADIP;KIAA0923                       |            |              |             |
| GI_41281572-S | 550.6  | 625.2  | 772.2  | BAHD1    | <a href="#">NM_014952.2</a> | KIAA0945                            | DNA        |              |             |
| GI_41281576-S | 161.7  | 188.5  | 196.6  | RIPX     | <a href="#">NM_014961.2</a> | KIAA0871                            |            |              |             |
| GI_41281578-S | 530.8  | 603.8  | 487.1  | SACM1L   | <a href="#">NM_014016.2</a> | SAC1;KIAA0851                       |            |              |             |
| GI_41281582-S | 123.3  | 138.4  | 135.4  | KIAA0433 | <a href="#">NM_015216.2</a> |                                     | acid       |              |             |
| GI_41281590-S | 861.7  | 780.5  | 963.3  | MBNL1    | <a href="#">NM_021038.2</a> | EXP;MBNL;EXP35;EXP40;EXP42;KIAA0428 | RNA        | nucleus      |             |
| GI_41281598-S | 321.7  | 383.3  | 347.1  | SMA4     | <a href="#">NM_021652.1</a> |                                     | molecular  | cellular_co  | carbohydr   |
| GI_41281602-S | 113    | 112.8  | 111.2  | IMUP     | <a href="#">NM_033520.1</a> | H2RSP                               |            |              |             |
| GI_41281611-S | 989.7  | 761.7  | 705    | C13orf8  | <a href="#">NM_032436.1</a> | FLJ90413;KIAA1802                   |            |              |             |
| GI_41281652-I | 171.5  | 200.5  | 187.4  | GTPBP3   | <a href="#">NM_133644.1</a> | MSS1;MTGP1;THDF1;GTPBG3;FLJ14700    | GTPase     |              | tRNA        |
| GI_41281667-S | 420.7  | 440.2  | 424.4  | SP2      | <a href="#">NM_003110.4</a> | KIAA0048                            | RNA        |              | regulation  |
| GI_41281671-I | 93.8   | 101.3  | 97.2   | TSAP6    | <a href="#">NM_138637.1</a> | FLJ10829                            |            |              |             |
| GI_41281674-I | 160.2  | 176.9  | 177.6  | MPPE1    | <a href="#">NM_138608.1</a> | FLJ11585                            |            |              |             |
| GI_41281682-I | 102.6  | 107.6  | 103.3  | DAB2IP   | <a href="#">NM_138709.1</a> | AF9Q34;DIP1/2;KIAA1743              |            |              |             |
| GI_41281684-I | 119    | 125.3  | 113.5  | GNAO1    | <a href="#">NM_138736.1</a> | GNAO;G-ALPHA-o                      | heterotrim | peripheral   | axon        |
| GI_41281694-S | 100.4  | 95.4   | 102.5  | OLIG1    | <a href="#">NM_138983.1</a> | BHLHB6                              | DNA        | nucleus      | regulation  |
| GI_41281708-I | 135.6  | 166.3  | 143.9  | TA-NFKBH | <a href="#">NM_139239.1</a> | MGC11314                            |            |              |             |

|               |        |        |                 |                             |                                       |             |             |              |
|---------------|--------|--------|-----------------|-----------------------------|---------------------------------------|-------------|-------------|--------------|
| GI_41281711-I | 142.8  | 166.5  | 161 PQBP1       | <a href="#">NM_144494.1</a> | SHS;MRX55;NPW38                       | transcripti | nucleus     | regulation   |
| GI_41281724-I | 160.4  | 167.5  | 164 PJA1        | <a href="#">NM_145119.1</a> | RNF70;FLJ11830                        | ligase      |             |              |
| GI_41281739-I | 80.5   | 87.1   | 78.4 COG4       | <a href="#">NM_145818.1</a> | COD1;DKFZp586E1519                    |             |             |              |
| GI_41281748-I | 157.9  | 417.5  | 219.2 ZNF323    | <a href="#">NM_145909.1</a> | FLJ23407                              | transcripti | nucleus     | regulation   |
| GI_41281752-I | 128.4  | 150.3  | 140.5 NEK11     | <a href="#">NM_145910.1</a> | FLJ23495                              | protein-    |             | protein      |
| GI_41281777-I | 171.5  | 202.2  | 175.8 ZNF268    | <a href="#">NM_152943.1</a> | HZF3                                  | transcripti | nucleus     | developm     |
| GI_41281781-I | 165.4  | 182.1  | 165.4 SPPL2B    | <a href="#">NM_152988.1</a> | IMP4;PSL1;KIAA1532                    | peptidase   | integral to | proteolysis  |
| GI_41281787-I | 117.7  | 136.2  | 115.5 MINA      | <a href="#">NM_153182.1</a> | MDIG;MINA53;FLJ14393                  |             |             |              |
| GI_41281793-I | 114.5  | 113.6  | 112.4 PMCHL2    | <a href="#">NM_153381.1</a> |                                       | molecular   | cellular_co | synaptic     |
| GI_41281797-I | 165.6  | 178.8  | 149.8 MAP3K7IP1 | <a href="#">NM_153497.1</a> | TAB1                                  | transformi  |             | activation   |
| GI_41281804-I | 105.2  | 110.9  | 109.7 RGS20     | <a href="#">NM_170587.1</a> | RGSZ1;ZGAP1                           | protein     | peripheral  | regulation   |
| GI_41281807-I | 217.2  | 258.6  | 235.4 USH1C     | <a href="#">NM_153676.1</a> | AIE-75;DFNB18;PDZ-45;PDZ-             | protein     | cellular_co | intracellula |
| GI_41281816-I | 208.6  | 248.2  | 242 EIF2B4      | <a href="#">NM_172195.1</a> | EIF2B;EIF-2B;EIF2Bdelta;DKFZP586J0119 | translation | eukaryotic  | translation  |
| GI_41281820-I | 373.9  | 472    | 422.3 SH2D3C    | <a href="#">NM_170600.1</a> | CHAT;NSP3                             | SH3/SH2     |             | JNK          |
| GI_41281830-I | 99.1   | 98.2   | 88.4 NPAS3      | <a href="#">NM_173159.1</a> | MOP6                                  |             |             |              |
| GI_41281845-I | 102.5  | 101.5  | 94.6 CLCN3      | <a href="#">NM_173872.1</a> | CLC3                                  | voltage-    | integral to | small        |
| GI_41281873-I | 918.2  | 616.2  | 666.2 ELYS      | <a href="#">NM_175865.1</a> | TMBS62;DKFZp434N093                   | structural  | microtubul  | microtubul   |
| GI_41281881-I | 94.3   | 100.4  | 93.3 ADAMTS20   | <a href="#">NM_175851.1</a> |                                       | zinc ion    | extracellul | proteolysis  |
| GI_41281884-S | 6528.3 | 7140.3 | 7089.1 HSPC051  | <a href="#">NM_013387.2</a> | UCRC;HSPC119                          |             |             |              |
| GI_41281894-I | 125.6  | 141.1  | 131.2 LMX1A     | <a href="#">NM_177399.1</a> | LMX1;LMX-1;LMX1.1                     | transcripti | nucleus     | regulation   |
| GI_41281901-I | 104.8  | 108.8  | 114.9 STARD13   | <a href="#">NM_178008.1</a> | DLC2;GT650;4902678                    | GTPase      |             |              |
| GI_41281906-I | 150.9  | 168.1  | 173.1 STARD13   | <a href="#">NM_178007.1</a> | DLC2;GT650;4902678                    | GTPase      |             |              |
| GI_41281910-I | 125.8  | 124    | 109.4 C3orf6    | <a href="#">NM_178335.1</a> |                                       |             |             |              |
| GI_41281932-I | 137.4  | 134.3  | 139.5 PACE-1    | <a href="#">NM_181093.1</a> | PACE1                                 | ATP         |             | protein      |
| GI_41281936-I | 570.3  | 805.7  | 382.1 NCAM1     | <a href="#">NM_181351.1</a> | CD56;NCAM;MSK39                       | cell        | integral to | synaptic     |
| GI_41281950-I | 381.1  | 401.5  | 366.8 SUPT3H    | <a href="#">NM_181356.1</a> | SPT3;SPT3L                            | RNA         | transcripti | regulation   |
| GI_41281953-S | 5251.8 | 3021.2 | 3626.1 GNPDA1   | <a href="#">NM_005471.3</a> | GPI;HLN;GNPI;GNPDA;KIAA0060           | glucosami   |             | glucosami    |
| GI_41281973-I | 126.4  | 121.1  | 125.8 TSAP6     | <a href="#">NM_182915.1</a> | FLJ10829                              |             |             |              |
| GI_41281980-I | 2100.2 | 1700.4 | 1794.6 TRIF     | <a href="#">NM_182919.1</a> | TICAM1;PRVTIRB;MGC35334               | transmem    | membran     |              |
| GI_41281983-I | 128.6  | 129.4  | 142 TSGA10      | <a href="#">NM_182911.1</a> |                                       | porin       | mitochond   |              |
| GI_41281986-I | 109.4  | 96.9   | 117.2 SYNE1     | <a href="#">NM_182961.1</a> | 8B;CPG2;MYNE1;MYNE-1;SYNE-1;SYNE-     | lamin       | nuclear     | Golgi        |
| GI_41281989-I | 581.5  | 481    | 424.8 TRNT1     | <a href="#">NM_182916.1</a> | CCA1;MtCCA;CGI-47                     | nucleotide  | mitochond   | tRNA         |
| GI_41281992-I | 134.3  | 149.8  | 143.6 SOC       | <a href="#">NM_183008.1</a> |                                       |             |             |              |
| GI_41281995-I | 228.9  | 236.2  | 233 FLJ20718    | <a href="#">NM_182922.1</a> |                                       |             |             |              |
| GI_41282001-I | 120.6  | 116.6  | 122.7 SPHK1     | <a href="#">NM_182965.1</a> | SPHK                                  | diacylglyc  | cytosol     | sphingosin   |
| GI_41282018-I | 99.4   | 93.3   | 94.8 NRAP       | <a href="#">NM_198060.1</a> |                                       | structural  | actin       | actin        |
| GI_41282073-I | 97.9   | 110.3  | 100.7 HTR4      | <a href="#">NM_199453.1</a> |                                       | serotonin   | integral to | G-protein    |
| GI_41282212-S | 81.1   | 80.2   | 84.8 UGT1A7     | <a href="#">NM_019077.2</a> | UGT1G                                 | UDP-        | extracellul | metabolis    |
| GI_41282220-S | 367.7  | 409.8  | 306.7 PPP1R15B  | <a href="#">NM_032833.2</a> | FLJ14744                              |             |             |              |
| GI_41282228-S | 118.6  | 125.7  | 119.4 UGT1A3    | <a href="#">NM_019093.2</a> | UGT1C                                 | UDP-        | microsom    | metabolis    |
| GI_41282232-S | 187    | 214.3  | 175.8 DEPDC1    | <a href="#">NM_017779.3</a> | DEP.8;SDP35;FLJ20354                  |             |             | intracellula |
| GI_41282244-I | 117.7  | 141.8  | 129.1 CASC2     | <a href="#">NM_201377.1</a> |                                       |             |             |              |
| GI_41282247-S | 1433.9 | 1389.6 | 1116.6 ZBED1    | <a href="#">NM_004729.2</a> | TRAMP;KIAA0785                        | transposa   | nuclear     |              |
| GI_41322907-I | 143.9  | 152.8  | 128.7 PLEC1     | <a href="#">NM_201379.1</a> | PCN;EBS1;EBSO;PLTN                    | structural  | intermedia  | cytoskelet   |

|               |        |        |        |          |                             |                                   |             |              |              |
|---------------|--------|--------|--------|----------|-----------------------------|-----------------------------------|-------------|--------------|--------------|
| GI_41322909-I | 184.5  | 220.2  | 175.6  | PLEC1    | <a href="#">NM_201381.1</a> | PCN;EBS1;EBSO;PLTN                | structural  | intermedia   | cytoskelet   |
| GI_41322911-I | 111.1  | 134.2  | 124.6  | PLEC1    | <a href="#">NM_201378.1</a> | PCN;EBS1;EBSO;PLTN                | structural  | intermedia   | cytoskelet   |
| GI_41322913-I | 137.7  | 148.3  | 160.1  | PLEC1    | <a href="#">NM_201383.1</a> | PCN;EBS1;EBSO;PLTN                | structural  | intermedia   | cytoskelet   |
| GI_41322915-I | 100    | 108.6  | 99.1   | PLEC1    | <a href="#">NM_201380.1</a> | PCN;EBS1;EBSO;PLTN                | structural  | intermedia   | cytoskelet   |
| GI_41322918-I | 296.1  | 344.4  | 319.9  | PLEC1    | <a href="#">NM_201382.1</a> | PCN;EBS1;EBSO;PLTN                | structural  | intermedia   | cytoskelet   |
| GI_41322922-I | 90.2   | 103.4  | 91.1   | PLEC1    | <a href="#">NM_201384.1</a> | PCN;EBS1;EBSO;PLTN                | structural  | intermedia   | cytoskelet   |
| GI_41327153-S | 525.7  | 633.8  | 585.3  | OBRGRP   | <a href="#">NM_017526.2</a> |                                   | molecular   | integral to  | biological_  |
| GI_41327154-S | 186.2  | 220.2  | 204.1  | EPAS1    | <a href="#">NM_001430.3</a> | MOP2;HIF2A                        | transcripti | nucleus      | signal       |
| GI_41327157-S | 148.9  | 1972.8 | 143.1  | ARHGAP4  | <a href="#">NM_001666.2</a> | C1;RGC1;RhoGAP4;KIAA0131          | SH3/SH2     | peripheral   | regulation   |
| GI_41327682-S | 117.1  | 110    | 100.2  | CORT     | <a href="#">NM_001302.2</a> | CST-14;CST-17;CST-29;MGC32686     | neuropepti  | soluble      | G-protein    |
| GI_41327684-S | 362.6  | 453.3  | 483.6  | C20orf44 | <a href="#">NM_018244.3</a> | BFZB                              |             |              |              |
| GI_41327690-I | 153    | 182.6  | 182.8  | C20orf23 | <a href="#">NM_024704.3</a> | SNX23;KISC20ORF                   |             |              |              |
| GI_41327692-S | 2648.2 | 3828.9 | 4159.7 | C20orf24 | <a href="#">NM_018840.2</a> | RIP5;PNAS-11                      |             |              |              |
| GI_41327699-S | 188.8  | 167.7  | 171.2  | CORT     | <a href="#">NM_198544.2</a> | CST-14;CST-17;CST-29;MGC32686     | neuropepti  | soluble      | G-protein    |
| GI_41327706-S | 126.6  | 123.9  | 130.1  | CRB1     | <a href="#">NM_012076.2</a> | RP12                              | calcium     |              | establish    |
| GI_41327709-A | 944.7  | 1148.8 | 971.5  | CRK      | <a href="#">NM_005206.3</a> | CRKII                             | SH3/SH2     | cytoplasm    | actin        |
| GI_41327711-I | 317.3  | 338.5  | 287.9  | CRK      | <a href="#">NM_016823.2</a> | CRKII                             | SH3/SH2     | cytoplasm    | actin        |
| GI_41327713-S | 2027.6 | 2525   | 1173.1 | C20orf3  | <a href="#">NM_020531.2</a> | BSCv;APMAP;C20ORF2                | molecular   | integral to  | biological_  |
| GI_41327714-S | 172.2  | 183.7  | 214.6  | C20orf64 | <a href="#">NM_033550.3</a> | PRPK;Nori-2;Nori-2p               | protein-    | nucleus      | protein      |
| GI_41327716-S | 176.5  | 213.7  | 267.4  | C20orf67 | <a href="#">NM_022104.3</a> | PCIF1                             |             |              |              |
| GI_41327717-S | 16129  | 4429.8 | 3035.1 | C20orf97 | <a href="#">NM_021158.3</a> | NIPK;SINK;TRB3;SKIP3;TRIB3        | ATP         |              | protein      |
| GI_41327718-S | 106.2  | 117.7  | 115.8  | CAMK1G   | <a href="#">NM_020439.2</a> | VWS1;CLICKIII;dJ272L16.1          | ATP         |              | protein      |
| GI_41327719-S | 213.6  | 255.7  | 243.1  | CAP2     | <a href="#">NM_006366.2</a> |                                   |             | membran      | establish    |
| GI_41327720-S | 211.3  | 208.9  | 217.6  | CAPN7    | <a href="#">NM_014296.2</a> | PALBH;CALPAIN7                    | calpain     | intracellula | proteolysis  |
| GI_41327721-S | 459.9  | 536    | 465.1  | CAPZA2   | <a href="#">NM_006136.2</a> | CAPZ;CAPPA2                       | actin       | F-actin      | cell         |
| GI_41327725-S | 267.7  | 315    | 273.2  | CHRNB1   | <a href="#">NM_000747.2</a> | ACHRB;CHRNB                       | acetylcholi | integral to  | synaptic     |
| GI_41327727-S | 183.9  | 253.9  | 232.5  | CLTC     | <a href="#">NM_004859.2</a> | CLH-17;CLTCL2;KIAA0034            | structural  | coated pit   | intracellula |
| GI_41327728-S | 710.7  | 903.5  | 799.6  | CNN2     | <a href="#">NM_004368.2</a> |                                   | actin       | cytoskelet   | cytoskelet   |
| GI_41327731-I | 106    | 122.5  | 113.4  | EGFR     | <a href="#">NM_201282.1</a> | ERBB;ERBB1                        | epidermal   | endosome     | EGF          |
| GI_41327733-I | 90.7   | 100.2  | 90.2   | EGFR     | <a href="#">NM_201283.1</a> | ERBB;ERBB1                        | epidermal   | endosome     | EGF          |
| GI_41327735-I | 304.9  | 383.6  | 331.7  | EGFR     | <a href="#">NM_201284.1</a> | ERBB;ERBB1                        | epidermal   | endosome     | EGF          |
| GI_41327737-I | 264.7  | 217.5  | 235    | EGFR     | <a href="#">NM_005228.3</a> | ERBB;ERBB1                        | epidermal   | endosome     | EGF          |
| GI_41327738-I | 214.2  | 252.8  | 230.8  | EPN2     | <a href="#">NM_014964.3</a> | EHB21;KIAA1065                    |             |              |              |
| GI_41327739-A | 276.8  | 247.3  | 230.5  | EPN2     | <a href="#">NM_148921.2</a> | EHB21;KIAA1065                    |             |              |              |
| GI_41327740-S | 957.4  | 1067.3 | 1384.2 | ETHE1    | <a href="#">NM_014297.3</a> | HSCO;YF13H12                      |             |              |              |
| GI_41327742-S | 107.1  | 117.4  | 112.6  | KCNJ12   | <a href="#">NM_021012.3</a> | IRK2;hIRK;KCNJN1;Kir2.2;Kir2.2v   | inward      | membran      | potassium    |
| GI_41327743-S | 164.2  | 180.9  | 177.5  | KIF1A    | <a href="#">NM_004321.4</a> | ATSV;UNC104;HUNC-104              | motor       | kinesin      | anterogra    |
| GI_41327744-S | 606.3  | 522.1  | 588.2  | KNTC1    | <a href="#">NM_014708.3</a> | ROD;KIAA0166                      | protein     | kinetochor   | mitotic      |
| GI_41327747-S | 573.4  | 694.8  | 653.4  | ANAPC2   | <a href="#">NM_013366.3</a> | APC2                              | ubiquitin-  |              | cyclin       |
| GI_41327748-S | 760.7  | 670    | 505    | ANAPC4   | <a href="#">NM_013367.2</a> | APC4                              | ubiquitin-  | anaphase-    | mitotic      |
| GI_41327750-S | 108.5  | 116.6  | 106.4  | ANGPTL3  | <a href="#">NM_014495.2</a> | ANGPT5                            |             | kinesin      |              |
| GI_41327751-S | 107.3  | 116.6  | 105    | ANKRD23  | <a href="#">NM_144994.6</a> | DARP;MARF3;FLJ32449               |             |              |              |
| GI_41327753-S | 122.6  | 272.2  | 246.3  | ANKRD3   | <a href="#">NM_020639.2</a> | DIK;PKK;RIP4;ANKK2                | protein-    |              | protein      |
| GI_41327755-S | 116.2  | 109.8  | 95     | ADAMTS4  | <a href="#">NM_005099.3</a> | ADMP-1;ADAMTS-2;ADAMTS-4;KIAA0688 | metallope   | extracellul  | proteolysis  |

|               |         |        |        |            |                             |                                      |             |              |             |
|---------------|---------|--------|--------|------------|-----------------------------|--------------------------------------|-------------|--------------|-------------|
| GI_41327757-S | 282.4   | 309.8  | 242.7  | ADCY7      | <a href="#">NM_001114.2</a> | KIAA0037                             | calcium/ca  | integral to  | signal      |
| GI_41327758-S | 10609.3 | 11546  | 8585   | ATP5O      | <a href="#">NM_001697.2</a> | ATPO;OSCP                            | hydrogen-   | proton-      | proton      |
| GI_41327759-S | 330.5   | 386.5  | 393    | ATP9B      | <a href="#">NM_198531.3</a> | NEO1L;ATPIIB;ATPASEP;FLJ46612;HUSSY- | ATP         | integral to  | aminopho    |
| GI_41327761-S | 207.1   | 230.3  | 195.2  | ABCA8      | <a href="#">NM_007168.2</a> | KIAA0822                             | nucleotide  | membran      | transport   |
| GI_41327762-S | 203.7   | 234    | 245.8  | AGPAT3     | <a href="#">NM_020132.3</a> | MGC4604;LPAAT-GAMMA1                 |             |              |             |
| GI_41327763-S | 3964.5  | 3928.1 | 4629.2 | AKR7A2     | <a href="#">NM_003689.2</a> | AFAR;AKR7;AFAR1;AFB1-AR1             | aldehyde    | Golgi        | aldehyde    |
| GI_41327765-A | 828.5   | 629.2  | 491.1  | ALEX2      | <a href="#">NM_014782.4</a> | MGC8742;KIAA0512;MGC13343            |             |              |             |
| GI_41327766-S | 735.7   | 807.6  | 602.5  | ARF4L      | <a href="#">NM_001661.2</a> | ARL6                                 | ARF small   | nucleus      | protein     |
| GI_41327768-S | 729.4   | 851.1  | 659.4  | ARHGEF18   | <a href="#">NM_015318.2</a> | KIAA0521;MGC15913                    |             |              |             |
| GI_41327770-S | 963.9   | 1197.2 | 1239   | DDX23      | <a href="#">NM_004818.2</a> | prp28;MGC8416;U5-100K                | ATP         | nucleus      | mRNA        |
| GI_41327772-S | 735.1   | 857.9  | 820.2  | DDX46      | <a href="#">NM_014829.2</a> | MGC9936;FLJ25329;KIAA0801            | nucleic     | nucleus      | regulation  |
| GI_41327774-S | 3160.3  | 3912.6 | 2756.4 | DDX47      | <a href="#">NM_016355.3</a> | E4-                                  |             |              |             |
| GI_41327778-S | 799.4   | 772    | 745.3  | DDX55      | <a href="#">NM_020936.1</a> | KIAA1595;MGC33209                    | nucleic     |              |             |
| GI_41327784-I | 188.4   | 228.6  | 212.3  | DKFZP564J0 | <a href="#">NM_199073.1</a> | MGC10527                             |             | nucleus      |             |
| GI_41327786-I | 89.2    | 108.8  | 93.3   | DKFZP564J0 | <a href="#">NM_199074.1</a> | MGC10527                             |             | nucleus      |             |
| GI_41327788-I | 167.8   | 185.5  | 161.5  | DKFZP564J0 | <a href="#">NM_199417.1</a> | MGC10527                             |             | nucleus      |             |
| GI_41349433-S | 159.8   | 175.6  | 170.1  | BAAT       | <a href="#">NM_001701.2</a> | BAT;BACAT                            | acyltransf  | cytosol      | glycine     |
| GI_41349434-S | 213.4   | 227.7  | 218.9  | BET1       | <a href="#">NM_005868.3</a> | hbet1                                | protein     | Golgi        | ER to       |
| GI_41349435-S | 1006.9  | 799.3  | 706.2  | BIRC2      | <a href="#">NM_001166.3</a> | API1;MIHB;CIAP1;HIAP2;RNF48          | apoptosis   | intracellula | cell        |
| GI_41349436-S | 344.8   | 487.5  | 451.6  | BMPR1A     | <a href="#">NM_004329.2</a> | ALK3;ACVRLK3                         | cAMP-       | integral to  | transformi  |
| GI_41349438-I | 186.7   | 232.7  | 153.7  | SEC31L1    | <a href="#">NM_014933.2</a> | ABP125;ABP130;SEC31A;HSPC275;HSPC3   |             |              |             |
| GI_41349440-A | 2292.4  | 2787   | 1673   | SEC31L1    | <a href="#">NM_016211.2</a> | ABP125;ABP130;SEC31A;HSPC275;HSPC3   |             |              |             |
| GI_41349442-S | 88.1    | 95.6   | 99.2   | SLICK      | <a href="#">NM_198503.2</a> | SLO2.1                               |             |              |             |
| GI_41349444-A | 916.6   | 1273.9 | 1449.3 | SOCS5      | <a href="#">NM_014011.4</a> | CIS6;CISH6;Cish5;SOCS-5;KIAA0671     | protein     | cytoplasm    | JAK-STAT    |
| GI_41349444-I | 322     | 381.8  | 331.3  | SOCS5      | <a href="#">NM_014011.4</a> | CIS6;CISH6;Cish5;SOCS-5;KIAA0671     | protein     | cytoplasm    | JAK-STAT    |
| GI_41349445-I | 94.6    | 98.4   | 85.2   | SOCS5      | <a href="#">NM_144949.2</a> | CIS6;CISH6;Cish5;SOCS-5;KIAA0671     | protein     | cytoplasm    | JAK-STAT    |
| GI_41349447-S | 301.5   | 368.5  | 320.3  | PREB       | <a href="#">NM_013388.4</a> | SEC12;MGC3467                        | transcripti | nucleus      | regulation  |
| GI_41349448-A | 1155.5  | 1297.3 | 1318.4 | PREI3      | <a href="#">NM_015387.2</a> | 2C4D;CGI-95;MGC12264;MOB1;MOB3       |             |              |             |
| GI_41349450-I | 112.2   | 110.3  | 104.9  | PREI3      | <a href="#">NM_199482.1</a> | 2C4D;CGI-95;MGC12264;MOB1;MOB3       |             |              |             |
| GI_41349452-S | 99.1    | 113.5  | 96.8   | PRELP      | <a href="#">NM_002725.3</a> | SLRR2A;MGC45323                      | extracellul | extracellul  | skeletal    |
| GI_41349455-S | 860.2   | 1241.4 | 1233.1 | PREP       | <a href="#">NM_002726.3</a> | PE;PEP;MGC16060                      | prolyl      | cytoplasm    | proteolysis |
| GI_41349457-S | 269     | 283    | 249    | PRDM10     | <a href="#">NM_020228.2</a> | KIAA1231;PFM7                        | DNA         | nucleus      | regulation  |
| GI_41349465-S | 227.3   | 320.5  | 285.8  | PRDM11     | <a href="#">NM_020229.2</a> | PFM8                                 |             |              |             |
| GI_41349467-S | 139.6   | 161.9  | 141.7  | PRDM13     | <a href="#">NM_021620.2</a> | MU-MB-20.220;PFM10                   | DNA         | nucleus      | regulation  |
| GI_41349469-S | 84.7    | 103.5  | 102.6  | PRDM16     | <a href="#">NM_022114.2</a> | MEL1;KIAA1675;PFM13                  | transcripti | nucleus      | regulation  |
| GI_41349473-S | 1975.1  | 1453.8 | 1449.4 | PRDM4      | <a href="#">NM_012406.3</a> | PFM1;MGC45046                        | RNA         | nucleus      | signal      |
| GI_41349475-S | 101.2   | 96.5   | 99.4   | PRDM5      | <a href="#">NM_018699.2</a> | PFM2                                 | DNA         | nucleus      | regulation  |
| GI_41349477-S | 176     | 219.2  | 196.9  | PRDM7      | <a href="#">NM_052996.2</a> | PFM4                                 | DNA         | nucleus      | regulation  |
| GI_41349481-S | 255.1   | 318    | 300    | PRB1       | <a href="#">NM_005039.2</a> | PM;PMF;PMS                           |             | extracellul  |             |
| GI_41349487-S | 230.5   | 263.2  | 239.3  | PRB3       | <a href="#">NM_006249.3</a> | G1;PRG                               |             |              |             |
| GI_41349489-S | 199.6   | 256.8  | 233.8  | PRB4       | <a href="#">NM_002723.3</a> | Po                                   | rhodopsin-  | integral to  | G-protein   |
| GI_41349490-I | 164.2   | 175.4  | 156.7  | PR48       | <a href="#">NM_199326.1</a> | B";PP2A;NY-REN-8                     | protein     | nucleus      | cell cycle  |
| GI_41349492-A | 702.5   | 421.4  | 493.1  | PR48       | <a href="#">NM_013239.3</a> | B";PP2A;NY-REN-8                     | protein     | nucleus      | cell cycle  |
| GI_41349493-S | 744.5   | 625.8  | 736.9  | PRIM1      | <a href="#">NM_000946.2</a> | p49;MGC12308                         | DNA         | alpha        | DNA         |

|               |        |        |        |          |                             |                                       |             |             |             |
|---------------|--------|--------|--------|----------|-----------------------------|---------------------------------------|-------------|-------------|-------------|
| GI_41349494-S | 846.9  | 769.5  | 834.1  | PRIM2A   | <a href="#">NM_000947.2</a> | p58;PRIM2;MGC75142                    | DNA         | alpha       | DNA         |
| GI_41349496-S | 161    | 170.5  | 163.1  | PDP2     | <a href="#">NM_020786.1</a> | KIAA1348                              | protein     | mitochond   | protein     |
| GI_41349498-S | 115.4  | 121.1  | 110.5  | PLP1     | <a href="#">NM_000533.3</a> | PLP;PMD;MMPL;SPG2;PLP/DM20            | structural  | integral to | nerve       |
| GI_41349503-S | 184.9  | 190.5  | 164    | GPR146   | <a href="#">NM_138445.2</a> | PGR8                                  | rhodopsin-  | integral to | G-protein   |
| GI_41349504-S | 605.9  | 673.3  | 838.4  | MGC19780 | <a href="#">NM_144988.2</a> |                                       |             |             |             |
| GI_41349679-S | 319.9  | 431.8  | 387.7  | FLJ25224 | <a href="#">NM_182495.3</a> |                                       |             |             |             |
| GI_41349931-S | 133    | 144    | 131.1  | DUB3     | <a href="#">NM_201402.1</a> |                                       |             |             |             |
| GI_41350194-S | 1108.6 | 1357   | 1140.2 | RB1CC1   | <a href="#">NM_014781.3</a> | CC1;DRAGOU14;KIAA0203                 |             |             |             |
| GI_41350195-S | 4677.2 | 5671.4 | 3897.4 | RAB1A    | <a href="#">NM_004161.3</a> | RAB1;DKFZP564B163                     | RAB small   | Golgi       | vesicle-    |
| GI_41350196-S | 303.9  | 420.8  | 342.4  | FATE     | <a href="#">NM_033085.2</a> |                                       |             | integral to |             |
| GI_41350197-S | 385.4  | 393.6  | 453.7  | FGIF     | <a href="#">NM_017704.2</a> | FLJ20189                              |             |             |             |
| GI_41350199-S | 111.9  | 123.8  | 124.1  | EAF2     | <a href="#">NM_018456.4</a> | BM040;TRAITS                          |             |             |             |
| GI_41350200-S | 530.6  | 602.6  | 561.7  | EPN1     | <a href="#">NM_013333.2</a> |                                       |             | coated      | endocytosi  |
| GI_41350202-S | 109.7  | 126.8  | 106.9  | DAT1     | <a href="#">NM_018640.3</a> |                                       |             |             |             |
| GI_41350203-S | 1745.7 | 1355.7 | 1616.6 | DCXR     | <a href="#">NM_016286.2</a> | DCR;P34H;KIDCR                        | oxidoredu   |             | metabolis   |
| GI_41350204-S | 1274.3 | 1795.1 | 1451.1 | CRIPT    | <a href="#">NM_014171.3</a> | HSPC139                               |             |             |             |
| GI_41350205-S | 174.9  | 195    | 199.4  | CNNM4    | <a href="#">NM_020184.2</a> | ACDP4;KIAA1592                        |             |             |             |
| GI_41350207-S | 159.2  | 222    | 181.3  | CASC1    | <a href="#">NM_018272.2</a> | LAS1;FLJ10921                         |             |             |             |
| GI_41350209-S | 102.2  | 114.9  | 95.7   | BCDO2    | <a href="#">NM_031938.2</a> | B-DIOX-II                             | oxidoredu   |             |             |
| GI_41350211-S | 699    | 822.8  | 807    | BRD7     | <a href="#">NM_013263.2</a> | BP75;NAG4;CELTIX1                     |             | cytoplasm   |             |
| GI_41350213-S | 97.3   | 108.6  | 89.2   | ASPN     | <a href="#">NM_017680.3</a> | PLAP1;SLRR1C;FLJ20129                 |             | extracellul |             |
| GI_41350215-S | 695.6  | 822.8  | 1022.1 | ALG1     | <a href="#">NM_019109.3</a> | HMAT1;HMT-1                           | mannosylt   | endoplas    | lipopolysa  |
| GI_41350303-I | 97.9   | 104.8  | 102.8  | NRXN3    | <a href="#">NM_004796.3</a> | KIAA0743                              | receptor    | integral to | axon        |
| GI_41350304-A | 125.6  | 138.4  | 124.6  | NRXN3    | <a href="#">NM_138970.2</a> | KIAA0743                              | receptor    | integral to | axon        |
| GI_41350306-I | 369.5  | 487.2  | 417    | NALP1    | <a href="#">NM_014922.3</a> | CARD7;DEFCAP;PP1044;KIAA0926;DEFCA    |             |             |             |
| GI_41350309-A | 182.1  | 187.1  | 147.6  | NALP1    | <a href="#">NM_033007.2</a> | CARD7;DEFCAP;PP1044;KIAA0926;DEFCA    |             |             |             |
| GI_41350315-I | 130.2  | 134.4  | 127.5  | MTMR2    | <a href="#">NM_201278.1</a> | CMT4B;CMT4B1;KIAA1073                 | protein     | cellular_co | protein     |
| GI_41350319-I | 95.8   | 94.5   | 92.2   | MAGED2   | <a href="#">NM_201222.1</a> | 11B6;BCG1;HCA10;JCL-1;MAGED;MAGE-     |             |             |             |
| GI_41350321-S | 371.4  | 434.8  | 337.3  | MAML1    | <a href="#">NM_014757.3</a> | Mam1;Mam-1;KIAA0200                   |             |             |             |
| GI_41350322-I | 1273.7 | 1842.8 | 1266.9 | MAPK8IP3 | <a href="#">NM_033392.3</a> | JIP3;SYD2;JSAP1;FLJ00027;KIAA1066     | kinesin     | kinesin     | vesicle-    |
| GI_41350324-A | 93.5   | 93.8   | 89.1   | MAPK8IP3 | <a href="#">NM_015133.2</a> | JIP3;SYD2;JSAP1;FLJ00027;KIAA1066     | kinesin     | kinesin     | vesicle-    |
| GI_41350325-S | 1924   | 2536.5 | 2587.2 | MBTPS1   | <a href="#">NM_003791.2</a> | S1P;PCSK8;SKI-1;KIAA0091              | serine-     | endoplas    | proteolysis |
| GI_41350328-S | 315    | 330.1  | 359.6  | MFN2     | <a href="#">NM_014874.2</a> | MARF;CPRP1;KIAA0214                   |             |             |             |
| GI_41350329-S | 240.8  | 188.5  | 149.5  | MOBK12B  | <a href="#">NM_024761.3</a> | MOB3B;FLJ13204;MGC32960               |             |             |             |
| GI_41350331-S | 195.4  | 222.8  | 203.8  | MOB      | <a href="#">NM_147156.3</a> | MGC17342                              |             |             |             |
| GI_41350332-S | 2161.6 | 2171.2 | 2405.3 | TBCD     | <a href="#">NM_005993.3</a> | KIAA0988                              | co-         | microtubul  | beta-       |
| GI_41350334-S | 89.1   | 101.1  | 113.2  | TCEA3    | <a href="#">NM_003196.1</a> | TFIIS.H                               | transcripti | nucleus     | transcripti |
| GI_41350336-S | 87.2   | 81.9   | 87.3   | TLR1     | <a href="#">NM_003263.3</a> | TIL;rs786;KIAA0012;DKFZp54710610;DKFZ | antibacteri | integral to | signal      |
| GI_41351543-I | 102.7  | 101.7  | 106.8  | CREB5    | <a href="#">NM_182899.2</a> | CRE-BPA                               | transcripti | nucleus     | transcripti |
| GI_41352060-I | 190.9  | 230.9  | 234.6  | PITRM1   | <a href="#">NM_014889.2</a> | MP1;hMP1;KIAA1104                     | pitrilysin  |             | proteolysis |
| GI_41352062-S | 4305.9 | 6027.6 | 4960.6 | PFKP     | <a href="#">NM_002627.3</a> | PFKF;PFK-C                            | magnesi     | 6-          | glycolysis  |
| GI_41352689-S | 365.2  | 348.4  | 368.8  | LARS2    | <a href="#">NM_015340.3</a> | LEURS;KIAA0028;MGC26121               | ATP         | mitochond   | leucyl-     |
| GI_41352690-S | 1209.4 | 1844.3 | 1478.3 | LAPTM4A  | <a href="#">NM_014713.3</a> | MBNT;Mtrp;LAPTM4;HUMORF13;KIAA0108    |             | integral to | transport   |
| GI_41352692-S | 237.9  | 311.8  | 252.3  | IREB2    | <a href="#">NM_004136.1</a> | IRP2;IRP2AD                           | RNA         | cytosol     | RNA         |

|               |        |        |        |           |                             |                                        |             |             |              |
|---------------|--------|--------|--------|-----------|-----------------------------|----------------------------------------|-------------|-------------|--------------|
| GI_41352694-S | 114.3  | 105.6  | 127.3  | FGF2      | <a href="#">NM_002006.3</a> | BFGF;FGFB;HBGH-2                       | fibroblast  | extracellul | activation   |
| GI_41352696-S | 187.3  | 220.5  | 208.6  | FSHPRH1   | <a href="#">NM_006733.2</a> | CENPI;LRPR1                            |             |             | female       |
| GI_41352698-S | 328.3  | 388.6  | 331.9  | WARS2     | <a href="#">NM_015836.2</a> | TrpRS                                  | tryptophan  | soluble     | protein      |
| GI_41352701-S | 2301.9 | 2049.3 | 2247.7 | DPH2L2    | <a href="#">NM_001384.3</a> | DPH2                                   |             |             |              |
| GI_41352704-S | 237.1  | 238.5  | 250.9  | KIF3C     | <a href="#">NM_002254.5</a> |                                        | motor       | kinesin     | nonselecti   |
| GI_41352706-S | 112.4  | 130.2  | 103.3  | OCLM      | <a href="#">NM_022375.2</a> | TISR                                   |             |             | mechanos     |
| GI_41352707-I | 401.8  | 467.5  | 444.2  | ARGBP2    | <a href="#">NM_021069.2</a> | KIAA0777                               | cytoskelet  | actin       |              |
| GI_41352708-A | 430.2  | 631.1  | 336.3  | ARGBP2    | <a href="#">NM_003603.3</a> | KIAA0777                               | cytoskelet  | actin       |              |
| GI_41352708-I | 148.9  | 152.4  | 131.1  | ARGBP2    | <a href="#">NM_003603.3</a> | KIAA0777                               | cytoskelet  | actin       |              |
| GI_41352711-S | 554.5  | 646.4  | 710.5  | IKKBK     | <a href="#">NM_001556.1</a> | IKK2;IKKB;NFKBIKB;IKK-beta             | ATP         | cytoplasm   | protein      |
| GI_41352713-S | 86.4   | 78.6   | 89.7   | MYT1      | <a href="#">NM_004535.2</a> | MTF1;MYTI;PLPB1                        | zinc ion    | nucleus     | transcripti  |
| GI_41352714-S | 3413.2 | 3358.7 | 3188.2 | VPS35     | <a href="#">NM_018206.3</a> | MEM3;FLJ10752;FLJ13588;FLJ20388;DKFZ   | protein     | cytosol     | intracellula |
| GI_41352715-S | 121.1  | 116.3  | 112.4  | D21S2056E | <a href="#">NM_003683.4</a> | NNP-1;NOP52                            |             | nucleus     |              |
| GI_41352716-S | 564.1  | 619.7  | 533.5  | DD5       | <a href="#">NM_015902.4</a> | EDD;HYD;KIAA0896                       | ubiquitin   | soluble     | ubiquitin-   |
| GI_41352717-S | 130.4  | 139.7  | 106.8  | DTX1      | <a href="#">NM_004416.2</a> |                                        | transcripti | cytoplasm   | cell         |
| GI_41352719-S | 96.6   | 105.5  | 94.9   | DLX5      | <a href="#">NM_005221.4</a> |                                        | transcripti | nucleus     | skeletal     |
| GI_41352720-S | 119.2  | 125.5  | 126.6  | SLC36A1   | <a href="#">NM_078483.2</a> | PAT1;LYAAT1                            | amino       | membran     | amino        |
| GI_41387215-S | 537.5  | 621.5  | 606.5  | RGS5      | <a href="#">NM_003617.2</a> | MSTP032                                | GTPase      | peripheral  | regulation   |
| GI_41393186-S | 122.6  | 141    | 141    | NOXA1     | <a href="#">NM_006647.1</a> | p51NOX;FLJ25475;NY-CO-31;SDCCAG31      | tumor       |             |              |
| GI_41393543-S | 112.1  | 128.3  | 113.3  | TSP-NY    | <a href="#">NM_032573.3</a> | aaa                                    |             |             |              |
| GI_41393544-A | 606.7  | 852.5  | 817.8  | RAB5C     | <a href="#">NM_004583.2</a> | RABL;RAB5CL                            | RAB small   |             | small        |
| GI_41393546-S | 870.6  | 877.1  | 721.1  | NAG       | <a href="#">NM_015909.2</a> | DKFZP586G1219                          | molecular   | ribosome    | oncogene     |
| GI_41393548-S | 94.6   | 108.6  | 90.3   | NUDT10    | <a href="#">NM_153183.1</a> | DIPP3a;hDIPP3alpha                     | hydrolase   |             |              |
| GI_41393550-S | 492.1  | 631.3  | 603.5  | NADSYN1   | <a href="#">NM_018161.4</a> | FLJ10631                               | ATP         |             | nitrogen     |
| GI_41393552-S | 520.1  | 368.7  | 155.4  | MGLL      | <a href="#">NM_007283.4</a> | MGL;HU-K5                              | lysosphosp  |             | lipid        |
| GI_41393555-S | 91.7   | 110.1  | 111    | MANEA     | <a href="#">NM_024641.2</a> | FLJ12838                               |             |             |              |
| GI_41393557-S | 263.7  | 335.6  | 305.4  | LUC7L     | <a href="#">NM_018032.3</a> | SR+89;LUC7B1;FLJ10231;LUC7-LIKE        |             |             |              |
| GI_41393558-I | 247.4  | 325.6  | 145.3  | KIF1B     | <a href="#">NM_183416.2</a> | KLP;CMT2;CMT2A;HMSNII;KIAA0591;KIAA1   |             |             |              |
| GI_41393560-S | 1077.4 | 1234.6 | 1159.9 | LAP3      | <a href="#">NM_015907.2</a> | LAP;PEPS;LAPEP                         | zinc ion    | cytoplasm   | proteolysis  |
| GI_41393562-I | 95.2   | 96.1   | 96.1   | KIF1B     | <a href="#">NM_015074.2</a> | KLP;CMT2;CMT2A;HMSNII;KIAA0591;KIAA1   |             |             |              |
| GI_41393564-S | 212.9  | 185.4  | 285.7  | ITPK1     | <a href="#">NM_014216.3</a> | ITRPK1                                 | catalytic   |             | signal       |
| GI_41393565-S | 650    | 633.5  | 521.7  | HIBADH    | <a href="#">NM_152740.2</a> | MGC40361                               | phosphogl   | mitochond   | pentose-     |
| GI_41393566-S | 91.8   | 85.3   | 82.5   | IL22      | <a href="#">NM_020525.4</a> | IL21;TIFa;IL-21;IL-22;ILTIF;IL-TIF;IL- | cytokine    | extracellul | immune       |
| GI_41393567-S | 1431.3 | 1745   | 1644.2 | HEBP2     | <a href="#">NM_014320.2</a> | SOUL;C6orf34                           |             |             |              |
| GI_41393568-S | 93     | 118.9  | 106.2  | HBP17     | <a href="#">NM_005130.2</a> | FGFBP;FGFBP1                           | heparin     | extracellul | negative     |
| GI_41393569-S | 129.3  | 129.6  | 136.9  | HDAC10    | <a href="#">NM_032019.4</a> | DKFZP761B039                           | hydrolase   | nucleus     | regulation   |
| GI_41393571-S | 1225.9 | 1175.3 | 1604.2 | GMNN      | <a href="#">NM_015895.3</a> | Gem                                    |             |             | negative     |
| GI_41393572-S | 489.8  | 547.2  | 509.1  | GIT1      | <a href="#">NM_014030.2</a> |                                        | ARF         | nucleus     | regulation   |
| GI_41393574-S | 99     | 103.1  | 107.9  | GK2       | <a href="#">NM_033214.2</a> | GKP2;GKTA                              | ATP         | mitochond   | carbohydr    |
| GI_41393576-S | 1457.8 | 1701.2 | 1309   | GEMIN6    | <a href="#">NM_024775.9</a> | FLJ23459                               | pre-mRNA    | spliceoso   | spliceoso    |
| GI_41393578-S | 123    | 130.5  | 117.2  | GIPC2     | <a href="#">NM_017655.4</a> | SEMCAP2;FLJ20075                       | protein     |             | intracellula |
| GI_41393580-S | 133.1  | 142.7  | 114.8  | ETS1      | <a href="#">NM_005238.2</a> |                                        | RNA         | nucleus     | negative     |
| GI_41393581-S | 654.1  | 405.2  | 274.1  | EGFL7     | <a href="#">NM_016215.3</a> | ZNEU1                                  | calcium     |             |              |
| GI_41393584-S | 115.2  | 109.8  | 110.2  | DNASE1L2  | <a href="#">NM_001374.2</a> | DNAS1L2                                | deoxyribo   |             | DNA          |



|               |        |        |        |           |                             |                                      |             |              |              |
|---------------|--------|--------|--------|-----------|-----------------------------|--------------------------------------|-------------|--------------|--------------|
| GI_41393585-A | 294.2  | 450.7  | 273.7  | DGKA      | <a href="#">NM_001345.4</a> | DAGK1;MGC12821;MGC42356;DGK-alpha    | diacylglyc  |              | intracellula |
| GI_41393588-S | 137.3  | 133.4  | 181.9  | ASAM      | <a href="#">NM_024769.2</a> | CLMP;FLJ22415                        |             |              |              |
| GI_41393589-S | 384.6  | 406.8  | 373.4  | ASK       | <a href="#">NM_006716.3</a> | DBF4                                 | enzyme      | intracellula | G1/S         |
| GI_41393590-S | 1059.2 | 1210.9 | 1213.8 | API5      | <a href="#">NM_006595.2</a> | AAC-11;API5L1                        | apoptosis   |              | anti-        |
| GI_41393591-S | 1200.2 | 863.2  | 999.9  | ADCK2     | <a href="#">NM_052853.3</a> | AARF;MGC20727                        |             |              |              |
| GI_41393592-S | 145.9  | 167.6  | 169.9  | ADCK5     | <a href="#">NM_174922.3</a> | FLJ35454                             |             |              |              |
| GI_41393594-S | 195.8  | 187.9  | 209.4  | CSMD1     | <a href="#">NM_033225.3</a> | KIAA1890                             | hydrolase   |              | carbohydr    |
| GI_41393596-S | 298.9  | 354.9  | 306.8  | CSAD      | <a href="#">NM_015989.3</a> | CSD;PCAP                             |             |              |              |
| GI_41393600-A | 347.9  | 1008.7 | 665.8  | C1S       | <a href="#">NM_001734.2</a> |                                      | compleme    |              | compleme     |
| GI_41393601-I | 109.5  | 160.1  | 131.4  | C1S       | <a href="#">NM_201442.1</a> |                                      | compleme    |              | compleme     |
| GI_41393603-I | 382.5  | 482.5  | 431.3  | RTN3      | <a href="#">NM_201429.1</a> | ASYIP;NSPL2;NSPLII                   | molecular   | endoplas     |              |
| GI_41393607-I | 103.5  | 96.2   | 104.1  | RTN3      | <a href="#">NM_201428.1</a> | ASYIP;NSPL2;NSPLII                   | molecular   | endoplas     |              |
| GI_41393609-I | 114.4  | 111.9  | 109.2  | RASSF6    | <a href="#">NM_201431.1</a> |                                      |             |              |              |
| GI_41393611-A | 1824   | 1455.3 | 1434.8 | RTN3      | <a href="#">NM_006054.2</a> | ASYIP;NSPL2;NSPLII                   | molecular   | endoplas     |              |
| GI_41393612-A | 127.2  | 139.7  | 124.9  | RASSF6    | <a href="#">NM_177532.3</a> |                                      |             |              |              |
| GI_41393613-I | 293.5  | 368.2  | 309.2  | RAB5C     | <a href="#">NM_201434.1</a> | RABL;RAB5CL                          | RAB small   |              | small        |
| GI_41393615-S | 112.7  | 118.4  | 105.1  | RAD9B     | <a href="#">NM_152442.2</a> | FLJ40346                             |             |              |              |
| GI_41399283-A | 7263.8 | 6876.1 | 6800.1 | HSPD1     | <a href="#">NM_002156.4</a> | CPN60;GROEL;HSP60;SPG13;HuCHA60      | ATP         | mitochond    | protein      |
| GI_41399284-I | 91.7   | 93.8   | 91.8   | HSPD1     | <a href="#">NM_199440.1</a> | CPN60;GROEL;HSP60;SPG13;HuCHA60      | ATP         | mitochond    | protein      |
| GI_41406049-S | 218.5  | 254.4  | 229.3  | DOK2      | <a href="#">NM_003974.2</a> | p56DOK;p56dok-2                      | protein     |              | cell         |
| GI_41406053-S | 2949.4 | 3031.2 | 3468.8 | APP       | <a href="#">NM_000484.2</a> | AAA;AD1;PN2;ABPP;APPI;CVAP;ABETA;Pre | serine-     | Golgi        | copper ion   |
| GI_41406060-I | 125.8  | 116.1  | 124.6  | MOBK12C   | <a href="#">NM_201403.1</a> | MOB3C;MGC26743                       |             |              |              |
| GI_41406062-S | 194.1  | 225.3  | 193.2  | MOBK11A   | <a href="#">NM_173468.2</a> | MOB4A;MGC33910                       |             |              |              |
| GI_41406063-S | 1042.1 | 996.3  | 1398.9 | MYH10     | <a href="#">NM_005964.1</a> | NMMHCB                               | actin       | kinesin      | cytokinesi   |
| GI_41406065-A | 1369.5 | 1960.2 | 1979.7 | H2AV      | <a href="#">NM_012412.3</a> | MGC1947;MGC10170;MGC10831            |             |              |              |
| GI_41406065-I | 2596.2 | 2703.1 | 2872.1 | H2AV      | <a href="#">NM_012412.3</a> | MGC1947;MGC10170;MGC10831            |             |              |              |
| GI_41406075-A | 129.8  | 150.5  | 150.9  | GAS7      | <a href="#">NM_003644.2</a> | MGC1348;KIAA0394                     | transcripti | kinesin      | cell cycle   |
| GI_41406075-I | 208.5  | 222.7  | 197.3  | GAS7      | <a href="#">NM_003644.2</a> | MGC1348;KIAA0394                     | transcripti | kinesin      | cell cycle   |
| GI_41406077-I | 143.5  | 175.7  | 179.4  | GAS7      | <a href="#">NM_201432.1</a> | MGC1348;KIAA0394                     | transcripti | kinesin      | cell cycle   |
| GI_41406079-I | 100.1  | 107.7  | 93.1   | GAS7      | <a href="#">NM_201433.1</a> | MGC1348;KIAA0394                     | transcripti | kinesin      | cell cycle   |
| GI_41406081-I | 116.8  | 137.3  | 133.5  | GPX1      | <a href="#">NM_201397.1</a> | GSHPX1;MGC14399                      | glutathion  |              | peroxidas    |
| GI_41406085-S | 98.2   | 117.4  | 101.2  | SEMA3D    | <a href="#">NM_152754.2</a> | coll-2;Sema-Z2;MGC39708              |             |              | developm     |
| GI_41406088-S | 438.8  | 543.1  | 576.2  | SOX13     | <a href="#">NM_005686.2</a> | ICA12;Sox-13                         | transcripti | nucleus      | embryoge     |
| GI_41406090-S | 121.8  | 165    | 138    | SPG6      | <a href="#">NM_144599.3</a> | FSP3;NIPA1;MGC35570                  |             |              |              |
| GI_41406092-I | 217.7  | 400.9  | 248.1  | JDP1      | <a href="#">NM_021800.2</a> |                                      | chaperone   |              | protein      |
| GI_41406093-I | 167.1  | 237.2  | 167.3  | JDP1      | <a href="#">NM_201262.1</a> |                                      | chaperone   |              | protein      |
| GI_41406095-S | 333.6  | 361.7  | 308.6  | DHX38     | <a href="#">NM_014003.3</a> | DDX38;PRP16;PRPF16;KIAA0224          | nucleic     | nucleus      | mRNA         |
| GI_41406096-S | 1017.3 | 1124.1 | 951.8  | DVL3      | <a href="#">NM_004423.3</a> | KIAA0208                             |             |              | heart        |
| GI_41462405-S | 104.5  | 125.9  | 121    | FLJ26056  | <a href="#">NM_201401.2</a> |                                      |             |              |              |
| GI_41462411-S | 125.6  | 143.8  | 132    | FLJ40217  | <a href="#">NM_201520.1</a> |                                      | binding     | membran      | transport    |
| GI_41529827-S | 342.3  | 418.2  | 396.6  | SLC30A7   | <a href="#">NM_133496.3</a> | ZNT7;ZnTL2                           | cation      | membran      | cation       |
| GI_41529828-S | 307.2  | 279.1  | 307.4  | MGC19604  | <a href="#">NM_080665.3</a> |                                      |             |              |              |
| GI_41529833-S | 158.2  | 178.3  | 173.1  | C6orf170  | <a href="#">NM_152730.3</a> | FLJ30899;dJ310J6.1                   |             |              |              |
| GI_41582235-S | 111    | 102.9  | 104.7  | LOC200030 | <a href="#">NM_183372.2</a> |                                      |             |              |              |

|               |        |        |        |           |                             |                                      |             |              |              |
|---------------|--------|--------|--------|-----------|-----------------------------|--------------------------------------|-------------|--------------|--------------|
| GI_41582237-A | 87.2   | 86.9   | 80.7   | ISLR      | <a href="#">NM_005545.3</a> | HsT17563                             | protein     | cell         |              |
| GI_41582238-I | 267.9  | 289.9  | 287.5  | ISLR      | <a href="#">NM_201526.1</a> | HsT17563                             | protein     | cell         |              |
| GI_41584199-S | 469.1  | 1698.6 | 2027.2 | GPR56     | <a href="#">NM_005682.4</a> | TM7LN4;TM7XN1                        | G-protein   | membran      | G-protein    |
| GI_41584203-S | 2171.3 | 2509.7 | 2414.1 | GNPNAT1   | <a href="#">NM_198066.2</a> | GNPNAT;Gpnat1;FLJ10607               | N-          |              |              |
| GI_41584204-S | 2144.3 | 1956.4 | 1396.4 | GMD5      | <a href="#">NM_001500.2</a> | GMD                                  | GDP-        |              | carbohydr    |
| GI_41584205-S | 87.5   | 87.5   | 88.3   | GNGT1     | <a href="#">NM_021955.2</a> | GNG1                                 | heterotrim  | peripheral   | signal       |
| GI_41680634-S | 273.1  | 344.1  | 300.8  | LOC200008 | <a href="#">NM_201546.1</a> |                                      | oxidoredu   |              | electron     |
| GI_41680643-S | 80     | 78.9   | 84.5   | C4orf11   | <a href="#">NM_201547.1</a> |                                      |             |              |              |
| GI_41680687-S | 136.4  | 158.1  | 142.8  | RP26      | <a href="#">NM_201548.1</a> | CERKL                                |             |              |              |
| GI_41680693-S | 129.9  | 167.8  | 163.2  | HRLRRP    | <a href="#">NM_201550.1</a> |                                      |             |              |              |
| GI_41871954-I | 89.9   | 95     | 92.2   | KNSL8     | <a href="#">NM_201522.1</a> | bA387M24.3                           |             |              |              |
| GI_41871964-I | 95.9   | 99.8   | 101.8  | KNSL8     | <a href="#">NM_138343.2</a> | bA387M24.3                           |             |              |              |
| GI_41872338-I | 144.3  | 162.1  | 156.4  | PPHLN1    | <a href="#">NM_201438.1</a> | HSPC206;HSPC232;MGC48786             |             |              |              |
| GI_41872353-I | 189.4  | 245.1  | 181.9  | PPHLN1    | <a href="#">NM_016488.4</a> | HSPC206;HSPC232;MGC48786             |             |              |              |
| GI_41872373-S | 553    | 620.3  | 542.9  | PLK3      | <a href="#">NM_004073.2</a> | CNK;FNK;PRK                          | protein     |              | protein      |
| GI_41872388-S | 406.2  | 419.2  | 366    | PP591     | <a href="#">NM_025207.3</a> | MGC31803;MGC40255                    |             |              |              |
| GI_41872408-S | 104.7  | 113.7  | 108.7  | PPBP      | <a href="#">NM_002704.2</a> | PBP;TC1;TC2;TGB;LDGF;MDGF;TGB1;B-    | glucose     | extracellul  | glucose      |
| GI_41872428-S | 680.1  | 931.5  | 975.2  | TRPC4AP   | <a href="#">NM_015638.2</a> | TRUSS;TRRP4AP;C20orf188              | peptide     | endoplas     | peptide      |
| GI_41872447-A | 246    | 268.2  | 241.6  | ELK4      | <a href="#">NM_001973.2</a> | SAP1                                 | transcripti | nucleus      | transcripti  |
| GI_41872447-I | 286    | 340.4  | 316.8  | ELK4      | <a href="#">NM_001973.2</a> | SAP1                                 | transcripti | nucleus      | transcripti  |
| GI_41872461-I | 96.6   | 89.1   | 78     | ELK4      | <a href="#">NM_021795.2</a> | SAP1                                 | transcripti | nucleus      | transcripti  |
| GI_41872473-S | 312    | 460.5  | 361.2  | ETV6      | <a href="#">NM_001987.3</a> | TEL                                  | transcripti | nucleus      | oncogene     |
| GI_41872487-I | 112.4  | 105.2  | 103.9  | DGKA      | <a href="#">NM_201444.2</a> | DAGK1;MGC12821;MGC42356;DGK-alpha    | diacylglyc  |              | intracellula |
| GI_41872493-I | 131.8  | 121.3  | 112.7  | DGKA      | <a href="#">NM_201445.1</a> | DAGK1;MGC12821;MGC42356;DGK-alpha    | diacylglyc  |              | intracellula |
| GI_41872506-A | 289.3  | 333.6  | 350.9  | DGKZ      | <a href="#">NM_003646.2</a> | DAGK5;DAGK6;DGK-ZETA;hDGKzeta        | diacylglyc  | nucleus      | signal       |
| GI_41872526-I | 87.5   | 97.8   | 78.7   | DGKZ      | <a href="#">NM_201533.1</a> | DAGK5;DAGK6;DGK-ZETA;hDGKzeta        | diacylglyc  | nucleus      | signal       |
| GI_41872532-A | 214.2  | 291.8  | 293.1  | NRP2      | <a href="#">NM_003872.2</a> | NPN2;PRO2714;VEGF165R2;NP2           | vascular    | membran      | axon         |
| GI_41872532-I | 162.6  | 198    | 168.8  | NRP2      | <a href="#">NM_003872.2</a> | NPN2;PRO2714;VEGF165R2;NP2           | vascular    | membran      | axon         |
| GI_41872543-I | 138    | 159.8  | 165    | NRP2      | <a href="#">NM_018534.3</a> | NPN2;PRO2714;VEGF165R2;NP2           | vascular    | membran      | axon         |
| GI_41872556-I | 162.6  | 184.2  | 225.4  | NRP2      | <a href="#">NM_201264.1</a> | NPN2;PRO2714;VEGF165R2;NP2           | vascular    | membran      | axon         |
| GI_41872576-S | 1258.8 | 2209   | 3016.8 | RAFTLIN   | <a href="#">NM_015150.1</a> | KIAA0084                             |             |              |              |
| GI_41872582-S | 296.3  | 318.9  | 277.3  | ROCK2     | <a href="#">NM_004850.3</a> | KIAA0619                             | protein     | intracellula | cytokinesi   |
| GI_41872597-S | 2923.3 | 2565.8 | 2804.9 | CPNE3     | <a href="#">NM_003909.2</a> | CPN3;PRO1071;KIAA0636                | transporte  |              | vesicle-     |
| GI_41872613-S | 126    | 120.3  | 115    | CXCL5     | <a href="#">NM_002994.3</a> | SCYB5;ENA-78                         | chemokin    | extracellul  | positive     |
| GI_41872630-S | 9261.7 | 9837.1 | 8514.7 | FASN      | <a href="#">NM_004104.4</a> | FAS;OA-519;MGC14367;MGC15706         | alcohol     |              | fatty acid   |
| GI_41872645-S | 577    | 724.2  | 652.2  | KIAA0076  | <a href="#">NM_014780.3</a> | CUL7                                 |             |              |              |
| GI_41872659-S | 378.8  | 342.4  | 411.4  | MRPL2     | <a href="#">NM_015950.3</a> | CGI-22;RPML14;MRP-L14                | structural  | ribosome     | protein      |
| GI_41872679-S | 427.5  | 476.7  | 388.3  | PPAN      | <a href="#">NM_020230.3</a> | SSF1;MGC14226;MGC45852               | DNA         | nucleus      | mRNA         |
| GI_41872688-S | 331.3  | 392.6  | 384.5  | PPFIA3    | <a href="#">NM_003660.2</a> | LPNA3;KIAA0654                       |             |              |              |
| GI_41872702-S | 153.5  | 191.6  | 223.8  | SLC9A8    | <a href="#">NM_015266.1</a> | NHE8;KIAA0939                        | sodium:hy   | integral to  | sodium       |
| GI_41872708-A | 81.9   | 90.4   | 77.7   | ZCCHC2    | <a href="#">NM_017742.3</a> | FLJ20281;KIAA1744;MGC13269;DKFZp451A |             |              |              |
| GI_42403569-I | 101.7  | 124.8  | 97.3   | FHL2      | <a href="#">NM_201557.1</a> | DRAL;SLIM3                           |             | nucleus      | oncogene     |
| GI_42403574-I | 232.2  | 284    | 267.3  | FHL2      | <a href="#">NM_201555.1</a> | DRAL;SLIM3                           |             | nucleus      | oncogene     |
| GI_42403584-A | 4266.9 | 5794   | 4666   | FHL2      | <a href="#">NM_001450.3</a> | DRAL;SLIM3                           |             | nucleus      | oncogene     |

|               |         |        |        |           |                             |                                      |             |              |             |
|---------------|---------|--------|--------|-----------|-----------------------------|--------------------------------------|-------------|--------------|-------------|
| GI_42415470-S | 119.9   | 130.6  | 131.2  | DXS1283E  | <a href="#">NM_004650.1</a> | GS2                                  | catalytic   | cellular_co  | biological_ |
| GI_42415487-S | 133.3   | 148.9  | 139.7  | LOC284861 | <a href="#">NM_201565.1</a> |                                      |             |              |             |
| GI_42415489-S | 102.3   | 98.7   | 110.7  | TRIM46    | <a href="#">NM_025058.2</a> | FLJ23229                             | zinc ion    | intracellula |             |
| GI_42415491-S | 92.6    | 96.6   | 100.3  | C14orf106 | <a href="#">NM_018353.3</a> | FLJ11186;KIAA1903;HSA242977          |             |              |             |
| GI_42415493-S | 126.2   | 166.5  | 145.5  | IRX5      | <a href="#">NM_005853.3</a> | IRX-2a                               | transcripti | nucleus      | regulation  |
| GI_42415495-S | 190.7   | 234.2  | 223.1  | SLC16A14  | <a href="#">NM_152527.3</a> | FLJ30794                             |             |              |             |
| GI_42415498-S | 149.5   | 174.9  | 163.2  | CRTAC1    | <a href="#">NM_018058.2</a> | ASPIC1;CEP-68;FLJ10320               |             |              |             |
| GI_42415502-S | 148.6   | 151.2  | 157.3  | USP31     | <a href="#">NM_020718.2</a> | KIAA1203                             | cysteine-   |              | ubiquitin-  |
| GI_42415526-S | 124.9   | 143.4  | 116.5  | MAFA      | <a href="#">NM_201589.1</a> | hMafA;RIPE3b1                        |             |              |             |
| GI_42415528-I | 117.2   | 118.4  | 115.5  | SLC4A3    | <a href="#">NM_201574.1</a> | AE3;SLC2C                            | inorganic   | membran      | small       |
| GI_42415530-I | 78.2    | 76.8   | 86.4   | C10orf94  | <a href="#">NM_201564.1</a> | ba108K14.6                           |             |              |             |
| GI_42415532-S | 111.9   | 121.6  | 123    | FCGR2C    | <a href="#">NM_201563.1</a> |                                      | receptor    | integral to  | signal      |
| GI_42475554-S | 241.3   | 286.5  | 273.1  | SLC16A13  | <a href="#">NM_201566.1</a> |                                      |             |              |             |
| GI_42475556-S | 10249.8 | 12493  | 11205  | SERF2     | <a href="#">NM_005770.3</a> | FAM2C;4F5REL;H4F5rel;HsT17089        |             |              | pathogene   |
| GI_42475557-I | 98.5    | 102.6  | 99.6   | C1orf16   | <a href="#">NM_173156.1</a> | EST1C;SMG-7;KIAA0250                 |             |              |             |
| GI_42475939-A | 1596.3  | 1333.6 | 1413.9 | ZNF261    | <a href="#">NM_005096.2</a> | MYM;XFIM;DXS6673E;KIAA0385;ZNF198L2  | DNA         | integral to  | developm    |
| GI_42475940-I | 124.2   | 131.5  | 132.4  | ZNF261    | <a href="#">NM_201599.1</a> | MYM;XFIM;DXS6673E;KIAA0385;ZNF198L2  | DNA         | integral to  | developm    |
| GI_42475964-S | 995.9   | 655.2  | 303.5  | AF038169  | <a href="#">NM_013310.2</a> |                                      |             |              |             |
| GI_42475969-S | 743.6   | 747.8  | 618.9  | 7h3       | <a href="#">NM_033025.4</a> | FLJ13511                             |             |              |             |
| GI_42476001-S | 104.2   | 100.4  | 84.9   | FLJ35107  | <a href="#">NM_182629.2</a> |                                      |             |              |             |
| GI_42476002-S | 111.8   | 107.6  | 98     | FLJ36198  | <a href="#">NM_173801.3</a> |                                      |             |              |             |
| GI_42476004-S | 188.9   | 198    | 192.2  | FLJ32569  | <a href="#">NM_152491.2</a> |                                      | metallope   |              | proteolysis |
| GI_42476006-S | 141.4   | 149.8  | 135.2  | FLJ34922  | <a href="#">NM_152270.2</a> |                                      |             |              |             |
| GI_42476008-S | 136.6   | 155    | 136.8  | FLJ30678  | <a href="#">NM_144657.2</a> |                                      | transcripti | nucleus      | regulation  |
| GI_42476012-S | 315.2   | 383.8  | 370.5  | FLJ25621  | <a href="#">NM_198514.2</a> | FLJ20147;FLJ33312;MGC45492;DKFZp779F | electron    |              | electron    |
| GI_42476014-S | 106.3   | 114.2  | 115.5  | FLJ22662  | <a href="#">NM_024829.2</a> |                                      |             |              |             |
| GI_42476016-S | 411.3   | 689.6  | 746.9  | FLJ23751  | <a href="#">NM_152282.2</a> |                                      |             |              |             |
| GI_42476017-S | 3266.3  | 3158.2 | 3651.8 | C19orf24  | <a href="#">NM_017914.2</a> | FLJ20640                             |             |              |             |
| GI_42476019-S | 88.1    | 89.1   | 95.8   | FLJ21934  | <a href="#">NM_024743.2</a> |                                      | transferas  |              | metabolis   |
| GI_42476021-S | 367.3   | 346    | 301    | FLJ20272  | <a href="#">NM_017735.3</a> |                                      |             |              |             |
| GI_42476023-S | 1201.6  | 1153.3 | 1525.8 | FLJ20274  | <a href="#">NM_017736.2</a> |                                      |             |              |             |
| GI_42476025-S | 243.6   | 252.4  | 298.1  | FLJ11526  | <a href="#">NM_024632.2</a> |                                      |             |              |             |
| GI_42476026-S | 463.9   | 332.4  | 235.6  | FLJ20095  | <a href="#">NM_017666.2</a> |                                      |             |              |             |
| GI_42476027-S | 982.1   | 826.8  | 847.5  | FLJ10709  | <a href="#">NM_018188.2</a> |                                      | nucleotide  |              |             |
| GI_42476029-S | 1006    | 1037   | 948.1  | FLJ10826  | <a href="#">NM_018233.2</a> |                                      | oxidoredu   |              | protein     |
| GI_42476031-S | 613.8   | 677.9  | 690.2  | FLJ10587  | <a href="#">NM_018149.3</a> |                                      |             |              |             |
| GI_42476034-S | 96.1    | 100.7  | 82.9   | FAM20A    | <a href="#">NM_017565.2</a> | DKFZp434F2322                        |             |              |             |
| GI_42476040-S | 1831.2  | 1814.9 | 1773.2 | DC13      | <a href="#">NM_020188.2</a> |                                      |             |              |             |
| GI_42476060-S | 407.2   | 472.4  | 381.7  | C4orf8    | <a href="#">NM_003704.2</a> | RES4-22                              | DNA         | nucleus      | regulation  |
| GI_42476062-S | 1401.6  | 856.7  | 853    | C6orf145  | <a href="#">NM_183373.2</a> |                                      |             |              |             |
| GI_42476063-S | 88.1    | 111.4  | 89.2   | C20orf58  | <a href="#">NM_152864.2</a> | ba261N11.2                           |             |              |             |
| GI_42476067-S | 7432.9  | 7673.4 | 4259   | C20orf30  | <a href="#">NM_014145.3</a> | HSPC274                              |             |              |             |
| GI_42476071-S | 397.9   | 505.9  | 389.8  | C14orf159 | <a href="#">NM_024952.4</a> | FLJ12618;FLJ20950;FLJ39975;C14orf160 | GTP         | signal       | protein     |
| GI_42476073-A | 1235.7  | 1171.3 | 916.5  | C1orf16   | <a href="#">NM_014837.3</a> | EST1C;SMG-7;KIAA0250                 |             |              |             |

|               |        |        |        |           |                             |                                   |              |              |             |
|---------------|--------|--------|--------|-----------|-----------------------------|-----------------------------------|--------------|--------------|-------------|
| GI_42476075-S | 715.7  | 765.5  | 728.8  | KIAA1012  | <a href="#">NM_014939.2</a> | HsT2706                           | intracellula | Golgi cis-   | ER to       |
| GI_42476079-S | 83     | 91.6   | 87     | IMPK      | <a href="#">NM_152230.2</a> | IPMK                              | inositol-    |              |             |
| GI_42476100-I | 100.5  | 117.2  | 105.3  | GTF2A1    | <a href="#">NM_201595.1</a> | TF2A1;TFIIA                       | RNA          | transcripti  | transcripti |
| GI_42476103-A | 97.9   | 106.1  | 101.1  | GTF2A1    | <a href="#">NM_015859.2</a> | TF2A1;TFIIA                       | RNA          | transcripti  | transcripti |
| GI_42476106-A | 129.4  | 107.6  | 99.5   | GPM6A     | <a href="#">NM_005277.3</a> | M6A;GPM6                          |              | integral to  |             |
| GI_42476107-I | 104.8  | 106.6  | 98.9   | GPM6A     | <a href="#">NM_201591.1</a> | M6A;GPM6                          |              | integral to  |             |
| GI_42476109-S | 1569.9 | 1547.6 | 1579.7 | GNPTAG    | <a href="#">NM_032520.3</a> | CAB56184;c316G12.3                |              |              |             |
| GI_42476110-S | 137.9  | 152.6  | 159.9  | GNA12     | <a href="#">NM_007353.2</a> | RMP;NNX3                          | heterotrim   | membran      | cell growth |
| GI_42476117-S | 118.9  | 128.7  | 124.8  | FYB       | <a href="#">NM_001465.3</a> | ADAP;PRO0823;SLAP-130             | protein      | nucleus      | NLS-        |
| GI_42476119-S | 460.7  | 575.7  | 666.5  | FNTB      | <a href="#">NM_002028.3</a> | FPTB;MGC31935                     | protein      | cytoplasm    | C-terminal  |
| GI_42476122-S | 1335.8 | 1279.1 | 1779.9 | RUSC1     | <a href="#">NM_014328.2</a> | NESCA                             | SH3/SH2      |              |             |
| GI_42476126-S | 770.1  | 690.5  | 782.1  | RPC2      | <a href="#">NM_018082.3</a> | FLJ10388                          | DNA-         | nucleus      | transcripti |
| GI_42476128-S | 103.5  | 123    | 107.7  | RRP22     | <a href="#">NM_006477.2</a> |                                   | small        |              | small       |
| GI_42476129-S | 760.1  | 613.1  | 671.2  | RAP80     | <a href="#">NM_016290.3</a> |                                   |              |              |             |
| GI_42476152-S | 92.2   | 144.1  | 92.5   | PTN       | <a href="#">NM_002825.5</a> | HARP;HBNF;HBGF8;NEGF1             | protein      | extracellul  | transmem    |
| GI_42476153-S | 844.5  | 814    | 1317.9 | PTPLB     | <a href="#">NM_198402.2</a> |                                   |              | nucleus      | DNA         |
| GI_42476154-S | 1198.3 | 1596.9 | 1456.3 | PTMS      | <a href="#">NM_002824.3</a> |                                   |              |              |             |
| GI_42476156-S | 442.7  | 548.1  | 517.5  | PRKCL1    | <a href="#">NM_002741.2</a> | DBK;PKN;PRK1                      | protein      | intracellula | activation  |
| GI_42476158-S | 107.9  | 106.9  | 95.2   | PSG3      | <a href="#">NM_021016.2</a> |                                   |              |              |             |
| GI_42476159-S | 151.1  | 166.8  | 148    | PPY       | <a href="#">NM_002722.2</a> | PNP                               | receptor     | soluble      | protein     |
| GI_42476160-S | 2125.9 | 2397.2 | 2753   | PPP1R16A  | <a href="#">NM_032902.5</a> | MYPT3;MGC14333                    |              | kinesin      |             |
| GI_42476161-S | 124.8  | 129.9  | 123.4  | PPP1R3C   | <a href="#">NM_005398.3</a> | PPP1R5                            | protein      |              |             |
| GI_42476163-S | 957.1  | 812.6  | 764.9  | POU2F1    | <a href="#">NM_002697.2</a> | OCT1;OTF1                         | transcripti  | nucleus      | regulation  |
| GI_42476165-S | 2590   | 1677.2 | 833.1  | PYGL      | <a href="#">NM_002863.2</a> |                                   | glycogen     |              | glycogen    |
| GI_42476168-S | 406.2  | 462    | 479.4  | PD2       | <a href="#">NM_019088.2</a> | F23149_1;FLJ11123                 |              |              |             |
| GI_42476171-S | 3005.9 | 3053   | 2454.3 | NIPA2     | <a href="#">NM_030922.3</a> | MGC5466                           | copper,      |              | superoxid   |
| GI_42476173-S | 126.2  | 149.7  | 165.3  | NAPE-PLD  | <a href="#">NM_198990.2</a> |                                   |              |              |             |
| GI_42476174-S | 1057.2 | 930.4  | 748.8  | NCOA7     | <a href="#">NM_181782.2</a> | ERAP140;dJ187J11.3                |              |              | cell wall   |
| GI_42476188-S | 103.6  | 115.7  | 98.3   | MPRA      | <a href="#">NM_178422.3</a> |                                   | receptor     | integral to  |             |
| GI_42476189-S | 97.2   | 85.3   | 75.8   | MYH2      | <a href="#">NM_017534.2</a> | MYH2A;MYHSA2;MYHas8;MyHC-2A;MyHC- | muscle       | striated     | striated    |
| GI_42476191-S | 308.4  | 538.9  | 439.7  | MGC8685   | <a href="#">NM_178012.3</a> | DKFZp566F223                      | GTP          | microtubul   | microtubul  |
| GI_42476192-S | 5008.4 | 6602.7 | 5988.4 | MGC8721   | <a href="#">NM_016127.4</a> | XTP3;FOAP-7;HSPC035;FLJ22274      |              |              |             |
| GI_42476196-S | 163.7  | 161.9  | 162.5  | MGC71999  | <a href="#">NM_199290.2</a> |                                   |              |              |             |
| GI_42476197-S | 146.3  | 166.3  | 163.2  | MGC15407  | <a href="#">NM_080667.3</a> |                                   |              |              |             |
| GI_42476199-S | 117.8  | 129.8  | 110.5  | MBD6      | <a href="#">NM_052897.2</a> | KIAA1887                          | DNA          |              |             |
| GI_42476202-S | 1462   | 4528   | 3702.4 | MADH3     | <a href="#">NM_005902.2</a> | SMAD3;JV15-2;HsT17436             | tumor        | intracellula | transformi  |
| GI_42476203-S | 271.9  | 432.6  | 327.1  | LOC90139  | <a href="#">NM_130783.2</a> | TSPAN                             |              |              |             |
| GI_42476205-S | 113.6  | 172.2  | 156    | LOC51308  | <a href="#">NM_016606.2</a> | SGC32445                          |              |              |             |
| GI_42476207-S | 1641.7 | 1494.9 | 1383.8 | LOC51321  | <a href="#">NM_016627.2</a> |                                   | metallope    |              | proteolysis |
| GI_42476209-S | 711.6  | 687.4  | 214.3  | LOC255104 | <a href="#">NM_181719.2</a> |                                   |              |              |             |
| GI_42476211-S | 99.6   | 122.4  | 109.1  | LOC134285 | <a href="#">NM_173490.4</a> |                                   |              |              |             |
| GI_42476213-S | 275.5  | 302.2  | 261.9  | LOC120526 | <a href="#">NM_181706.3</a> |                                   |              |              |             |
| GI_42476215-S | 673.5  | 896.6  | 712.3  | LOC119710 | <a href="#">NM_138787.2</a> |                                   |              |              |             |
| GI_42476268-S | 126    | 145.5  | 106.7  | ZXDA      | <a href="#">NM_007156.2</a> |                                   | DNA          | nucleus      | biological_ |

|               |         |        |        |           |                             |                                   |              |              |              |
|---------------|---------|--------|--------|-----------|-----------------------------|-----------------------------------|--------------|--------------|--------------|
| GI_42476270-S | 230.3   | 308.7  | 267.5  | ZFP42     | <a href="#">NM_174900.2</a> | REX1                              |              |              |              |
| GI_42476271-S | 109.1   | 184.1  | 127.8  | ZNF513    | <a href="#">NM_144631.3</a> | FLJ32203                          |              |              |              |
| GI_42476278-S | 9802.5  | 10056  | 8465.4 | VKORC1    | <a href="#">NM_024006.3</a> | VKOR;MST134;MST576;UNQ308;VKCFD2; |              |              |              |
| GI_42476280-S | 5862    | 6112.3 | 5624.3 | VDAC2     | <a href="#">NM_003375.2</a> |                                   | voltage-     | mitochond    | anion        |
| GI_42476283-S | 4142.5  | 5663.6 | 4746.7 | UBL5      | <a href="#">NM_024292.2</a> | HUB1                              | molecular    | cytoplasm    | biological_  |
| GI_42476295-S | 1839.9  | 2677.8 | 1467.9 | TPM2      | <a href="#">NM_003289.2</a> | DA1;TMSB;AMCD1                    | structural   | muscle       | muscle       |
| GI_42476298-S | 271.3   | 331.2  | 325.7  | TNRC15    | <a href="#">NM_015575.2</a> | GIGYF2;KIAA0642                   |              |              |              |
| GI_42476300-S | 275.1   | 327.1  | 275.5  | TOMM70A   | <a href="#">NM_014820.2</a> |                                   |              | mitochond    |              |
| GI_42476304-S | 922.4   | 1140.7 | 969.1  | TMEM4     | <a href="#">NM_014255.3</a> | MSAP;ZSIG9;HP10390                |              | integral to  |              |
| GI_42476317-S | 120.6   | 131.9  | 129.3  | SLRN      | <a href="#">NM_181506.3</a> |                                   |              |              |              |
| GI_42476319-S | 161     | 273.7  | 187.5  | SUSD1     | <a href="#">NM_022486.2</a> | DKFZP761E1824                     |              |              |              |
| GI_42476321-S | 252.2   | 349.2  | 286    | SLC36A3   | <a href="#">NM_181774.2</a> | PAT3;TRAMD2;tramdorin2            | amino        | membran      | amino        |
| GI_42476323-S | 430.3   | 470.2  | 351.5  | SLC43A1   | <a href="#">NM_003627.4</a> | LAT3;PB39;POV1;R00504             |              |              | oncogene     |
| GI_42476324-S | 82.4    | 84.7   | 81.3   | SLC18A2   | <a href="#">NM_003054.2</a> | SVAT;SVMT;VAT2;VMAT2              | monoamin     | secretory    | monoamin     |
| GI_42476327-S | 237.9   | 310.5  | 250.4  | SHD       | <a href="#">NM_020209.2</a> |                                   |              |              | intracellula |
| GI_42476329-S | 95.4    | 91.5   | 96.3   | SFTPD     | <a href="#">NM_003019.3</a> | SP-D;SFTPD4;COLEC7                | lectin [goid | kinesin      | antimicrob   |
| GI_42476331-S | 17145.9 | 23364  | 23736  | SH3BGRL3  | <a href="#">NM_031286.2</a> | TIP-B1                            |              | nucleus      |              |
| GI_42476334-S | 102.1   | 115.3  | 109.1  | SFTPC     | <a href="#">NM_003018.2</a> | SP-C;PSP-C;SFTPD2                 | surfactant   | extracellul  | respiratory  |
| GI_42476336-I | 158.2   | 145.7  | 147.2  | SB153     | <a href="#">NM_201400.1</a> | MGC19636                          |              |              |              |
| GI_42490739-S | 146.5   | 158.8  | 146.6  | MICL      | <a href="#">NM_138337.3</a> | CLL-1                             | lectin [goid |              | heterophili  |
| GI_42490743-I | 131.7   | 148.3  | 153.5  | MICL      | <a href="#">NM_201625.1</a> | CLL-1                             | lectin [goid |              | heterophili  |
| GI_42490745-A | 1333.3  | 1107.1 | 1529.3 | MED8      | <a href="#">NM_052877.2</a> | ARC32;MGC17544;MGC19641           | receptor     | nucleus      | regulation   |
| GI_42490746-I | 861     | 918.1  | 801.1  | MED8      | <a href="#">NM_201542.1</a> | ARC32;MGC17544;MGC19641           | receptor     | nucleus      | regulation   |
| GI_42490748-S | 437.1   | 393.5  | 246.7  | ABCB7     | <a href="#">NM_004299.3</a> | ABCB7;ASAT;Atm1p;EST140535        | heme         | mitochond    | small        |
| GI_42490752-S | 150.6   | 243.1  | 193.3  | TEAD3     | <a href="#">NM_003214.2</a> | TEF5;TEAD5;TEF-5;DTEF-1;ETFR-1    | RNA          | nucleus      | pregnancy    |
| GI_42490754-S | 172.2   | 210.7  | 185.5  | TSHB      | <a href="#">NM_000549.2</a> | TSH-BETA                          | peptide      | extracellul  | G-protein    |
| GI_42490755-S | 287.8   | 366.7  | 317.4  | GNS       | <a href="#">NM_002076.2</a> | G6S;MGC21274                      | N-           | lysosome     | glycosami    |
| GI_42490756-S | 389.8   | 383    | 417.8  | GOLGA1    | <a href="#">NM_002077.2</a> | MGC33154;golgin-97                |              | Golgi        |              |
| GI_42490757-S | 143.7   | 150.5  | 149.3  | CDC25A    | <a href="#">NM_001789.2</a> |                                   | prenylated   | intracellula | regulation   |
| GI_42490763-S | 766.5   | 753.6  | 560.6  | ELOVL1    | <a href="#">NM_022821.2</a> | Ssc1;CGI-88                       |              | endoplas     | fatty acid   |
| GI_42490765-S | 467.1   | 615.2  | 558.7  | SP6       | <a href="#">NM_199262.2</a> | KLF14                             |              |              |              |
| GI_42491353-I | 192.3   | 211.3  | 196.5  | LOC284948 | <a href="#">NM_201594.1</a> |                                   |              |              | intracellula |
| GI_42491357-I | 117.8   | 113.4  | 115.3  | PSK-1     | <a href="#">NM_201575.1</a> |                                   |              |              |              |
| GI_42491361-I | 110.6   | 112.6  | 119.3  | IKIP      | <a href="#">NM_201612.1</a> | FLJ31051                          |              |              |              |
| GI_42491369-S | 131.5   | 156.8  | 141.1  | FLJ43806  | <a href="#">NM_201628.1</a> |                                   |              |              |              |
| GI_42516554-S | 125.4   | 113.4  | 98.9   | pknbeta   | <a href="#">NM_013355.3</a> |                                   | protein      | Golgi        | protein      |
| GI_42516559-S | 422.6   | 543.5  | 707.9  | ZDHHC12   | <a href="#">NM_032799.4</a> | ZNF400;FLJ14524;MGC13153;MGC54050 |              | integral to  |              |
| GI_42516560-I | 94.3    | 82.7   | 92.6   | USP33     | <a href="#">NM_201626.1</a> | VDU1;KIAA1097;MGC16868            | cysteine-    |              | ubiquitin    |
| GI_42516562-S | 644.7   | 784.2  | 748    | UXS1      | <a href="#">NM_025076.2</a> | FLJ23591                          | catalytic    |              | nucleotide-  |
| GI_42516568-S | 5468.8  | 3660.6 | 3237.6 | TRIP10    | <a href="#">NM_004240.2</a> | CIP4                              | protein      |              | actin        |
| GI_42516569-S | 177.6   | 184.5  | 172.4  | TXNDC2    | <a href="#">NM_032243.4</a> | SPTRX;MGC35026;DKFZp434H0311      | electron     |              | electron     |
| GI_42516571-S | 896.2   | 1094.6 | 1346.8 | TRIM41    | <a href="#">NM_033549.3</a> | MGC1127;MGC31991                  |              |              |              |
| GI_42516575-S | 6486.6  | 7236.9 | 6859.3 | C14orf87  | <a href="#">NM_016417.2</a> | FLB4739;PR01238                   |              |              |              |
| GI_42518066-S | 333.1   | 353.6  | 304    | TNPO3     | <a href="#">NM_012470.2</a> | IPO12;MTR10A;TRN-SR;TRN-SR2       | receptor     | transportin  | nucleocyto   |

|               |        |        |        |           |                             |                                    |             |             |              |
|---------------|--------|--------|--------|-----------|-----------------------------|------------------------------------|-------------|-------------|--------------|
| GI_42518067-S | 154.1  | 200.6  | 226.6  | TGOLN2    | <a href="#">NM_006464.2</a> | TGN38;TGN46;TGN48;TGN51;TTGN2;MGC  | Golgi-      |             |              |
| GI_42518069-S | 526    | 965.1  | 1018.8 | TJP2      | <a href="#">NM_004817.2</a> | ZO2;X104;ZO-2;MGC26306             | membran     | tight       | intracellula |
| GI_42518071-I | 105.8  | 92.4   | 91.1   | TGM5      | <a href="#">NM_201631.1</a> | TGX;TGM6;TGMX                      | protein-    |             | epidermal    |
| GI_42518075-S | 849.7  | 810    | 1022.6 | TEX261    | <a href="#">NM_144582.2</a> | MGC32043                           |             |             |              |
| GI_42518079-S | 193.4  | 289    | 268.2  | TCF7      | <a href="#">NM_003202.2</a> | TCF-1;MGC47735                     | RNA         | nucleus     | regulation   |
| GI_42518081-I | 220.5  | 168.5  | 128    | TBXA2R    | <a href="#">NM_201636.1</a> |                                    | thromboxa   | integral to | respiratory  |
| GI_42518083-I | 181.1  | 229.2  | 204    | TBXA2R    | <a href="#">NM_001060.3</a> |                                    | thromboxa   | integral to | respiratory  |
| GI_42519906-I | 172.2  | 201.6  | 187.7  | GLYAT     | <a href="#">NM_005838.2</a> | CAT;GAT;ACGNAT                     | acyltransf  | mitochond   | response     |
| GI_42519908-I | 82.2   | 93.8   | 89.9   | GLYAT     | <a href="#">NM_201648.1</a> | CAT;GAT;ACGNAT                     | acyltransf  | mitochond   | response     |
| GI_42519910-S | 2842   | 3079.4 | 2232.1 | STAMBP    | <a href="#">NM_006463.3</a> | AMSH                               |             | nucleus     | JAK-STAT     |
| GI_42519913-S | 476.3  | 547.7  | 433.8  | STAT5B    | <a href="#">NM_012448.3</a> | STAT5                              | transcripti | nucleus     | JAK-STAT     |
| GI_42519914-A | 275.4  | 260    | 233.8  | FOXO3A    | <a href="#">NM_001455.2</a> | AF6q21;FKHRL1;FKHRL1P2;MGC12739;MG | transcripti | cytoplasm   | induction    |
| GI_42519915-I | 132.1  | 108.8  | 107.3  | FOXO3A    | <a href="#">NM_201559.1</a> | AF6q21;FKHRL1;FKHRL1P2;MGC12739;MG | transcripti | cytoplasm   | induction    |
| GI_42542378-S | 2587.1 | 2966.6 | 2767.9 | SRRM1     | <a href="#">NM_005839.2</a> | 160-KD;POP101;SRM160;MGC39488      | pre-mRNA    | nucleus     | mRNA         |
| GI_42542380-I | 605.3  | 755.8  | 685.3  | SLC28A1   | <a href="#">NM_004213.3</a> | CNT1;HCNT1                         | nucleoside  | membran     | nucleoside   |
| GI_42542382-I | 114    | 115.2  | 102.7  | SLC28A1   | <a href="#">NM_201651.1</a> | CNT1;HCNT1                         | nucleoside  | membran     | nucleoside   |
| GI_42542384-S | 161.7  | 230.4  | 180.5  | SILV      | <a href="#">NM_006928.3</a> | SI;SIL;ME20;gp100;PMEL17;D12S53E   | tumor       | integral to | melanin      |
| GI_42542385-S | 92.5   | 99.3   | 92     | SLC22A9   | <a href="#">NM_080866.2</a> | OAT4;ust3;HOAT4;UST3H              |             |             |              |
| GI_42542387-S | 2563.3 | 1629.8 | 1471.1 | SFXN4     | <a href="#">NM_178867.3</a> | BCRM1                              | cation      | membran     | cation       |
| GI_42542389-S | 131.6  | 150.3  | 134.9  | CD209L    | <a href="#">NM_014257.3</a> | LSIGN;DCSIGNR;HP10347;DC-SIGN2;DC- |             | integral to |              |
| GI_42542391-S | 1817.3 | 1523   | 1059.8 | CEBPZ     | <a href="#">NM_005760.2</a> | CBF2;HSP-CBF                       | transcripti | nucleus     | transcripti  |
| GI_42542393-S | 438.8  | 591.6  | 608.3  | C3F       | <a href="#">NM_005768.5</a> |                                    |             |             |              |
| GI_42542397-A | 87.6   | 99.6   | 97.3   | CHIA      | <a href="#">NM_021797.2</a> | ECF-L;AMCase;TSA1902               | chitin      | extracellul | carbohydr    |
| GI_42542399-I | 99.8   | 110.8  | 96.9   | CHIA      | <a href="#">NM_201653.1</a> | ECF-L;AMCase;TSA1902               | chitin      | extracellul | carbohydr    |
| GI_42542401-A | 807.3  | 844.6  | 774.2  | B7        | <a href="#">NM_006992.2</a> |                                    |             |             |              |
| GI_42542402-S | 1437.8 | 1392.3 | 1546.6 | CGI-01    | <a href="#">NM_015935.3</a> | KIAA0859                           | S-          |             |              |
| GI_42543993-S | 101.2  | 90.9   | 101.6  | ZNF539    | <a href="#">NM_203282.1</a> |                                    |             |             |              |
| GI_42544116-I | 112.9  | 133.5  | 130.9  | HSRTSBETA | <a href="#">NM_202758.1</a> | RTS                                |             |             |              |
| GI_42544118-A | 172.5  | 254.9  | 220    | HSRTSBETA | <a href="#">NM_017512.2</a> | RTS                                |             |             |              |
| GI_42544120-S | 493.4  | 544.2  | 562.4  | VPS13C    | <a href="#">NM_017684.3</a> | FLJ10381;FLJ20136;KIAA1421         |             |             |              |
| GI_42544126-I | 149.5  | 159.2  | 132.6  | SF1       | <a href="#">NM_201997.1</a> | ZFM1;ZNF162;D11S636                | transcripti | nucleus     | regulation   |
| GI_42544128-S | 118.3  | 136.7  | 144.6  | SCAMP5    | <a href="#">NM_138967.2</a> | MGC24969                           |             |             |              |
| GI_42544131-A | 156.7  | 132.3  | 88.6   | SAH       | <a href="#">NM_005622.2</a> | SA                                 | catalytic   |             | regulation   |
| GI_42544133-I | 241.6  | 233.2  | 207.1  | SAH       | <a href="#">NM_202000.1</a> | SA                                 | catalytic   |             | regulation   |
| GI_42544135-S | 624.4  | 883.1  | 546.2  | RRM2B     | <a href="#">NM_015713.3</a> | P53R2;MGC42116                     | ribonucleo  |             | response     |
| GI_42544137-S | 2467.2 | 1879.5 | 1411.8 | RRP46     | <a href="#">NM_020158.2</a> | MGC12901                           | exonuclea   | nucleolus   | rRNA         |
| GI_42544150-S | 666.9  | 686.1  | 648.8  | MGC4268   | <a href="#">NM_031445.2</a> |                                    |             |             |              |
| GI_42544152-S | 162.1  | 168.5  | 156.9  | LTK       | <a href="#">NM_002344.2</a> | TYK1                               | protein-    | soluble     | protein      |
| GI_42544154-S | 410    | 473.1  | 448.7  | MED6      | <a href="#">NM_005466.2</a> | NY-REN-28                          | RNA         | nucleus     | regulation   |
| GI_42544158-S | 1492.2 | 2040.5 | 2316.9 | HSPH1     | <a href="#">NM_006644.2</a> | HSP105A;HSP105B;KIAA0201;NY-CO-25  | heat        | cytoplasm   | heat         |
| GI_42544162-S | 182.7  | 345.8  | 171.9  | FREB      | <a href="#">NM_032738.3</a> | FCRL;MGC4595                       |             |             |              |
| GI_42544164-A | 1231.7 | 1273.9 | 1798.3 | FOXM1     | <a href="#">NM_021953.2</a> | MPP2;HFH11;HNF-3;INS-1;MPP-        | RNA         | nucleus     | response     |
| GI_42544166-I | 78.7   | 84.4   | 79.4   | FOXM1     | <a href="#">NM_202002.1</a> | MPP2;HFH11;HNF-3;INS-1;MPP-        | RNA         | nucleus     | response     |
| GI_42544168-I | 176.1  | 174    | 140.6  | ERCC1     | <a href="#">NM_202001.1</a> | UV20                               | endodeox    | nucleus     | nucleotide-  |

|               |        |        |        |           |                             |                                  |              |             |              |
|---------------|--------|--------|--------|-----------|-----------------------------|----------------------------------|--------------|-------------|--------------|
| GI_42544170-A | 1050.8 | 1100.7 | 1100.1 | ERCC1     | <a href="#">NM_001983.2</a> | UV20                             | endodeox     | nucleus     | nucleotide-  |
| GI_42544171-I | 122.9  | 120.5  | 123    | ELF2      | <a href="#">NM_201999.1</a> | EU32;NERF;NERF-2;NERF-1A;NERF-1B | transcripti  | nucleus     | regulation   |
| GI_42544173-S | 2564.9 | 2451.7 | 2999.8 | DTYMK     | <a href="#">NM_012145.2</a> | CDC8;TMPK;TYMK                   | thymidylat   |             | cell cycle   |
| GI_42544175-A | 628    | 668.8  | 392.1  | ELF2      | <a href="#">NM_006874.2</a> | EU32;NERF;NERF-2;NERF-1A;NERF-1B | transcripti  | nucleus     | regulation   |
| GI_42544176-S | 78.2   | 76.1   | 63.8   | CR2       | <a href="#">NM_001877.2</a> | C3DR;CD21                        | compleme     | integral to | compleme     |
| GI_42544178-S | 254.5  | 281.7  | 256.6  | CIZ1      | <a href="#">NM_012127.2</a> | LSFR1;ZNF356                     | zinc ion     | nucleus     | regulation   |
| GI_42544180-A | 88.8   | 96.7   | 89.6   | BMX       | <a href="#">NM_001721.4</a> | ETK;PSCTK2;PSCTK3                | protein-     |             | mesoderm     |
| GI_42544181-I | 125.7  | 125.8  | 108.2  | BMX       | <a href="#">NM_203281.1</a> | ETK;PSCTK2;PSCTK3                | protein-     |             | mesoderm     |
| GI_42544183-S | 128.2  | 143.5  | 126.8  | APOBEC2   | <a href="#">NM_006789.2</a> | ARP1;ARCD1                       | cytidine     |             | RNA          |
| GI_42544184-A | 407    | 416.7  | 354.8  | LGALS8    | <a href="#">NM_006499.3</a> | Gal-8;PCTA-1;Po66-CBP            | lectin [goid | extracellul | oncogene     |
| GI_42544188-I | 103.9  | 101.9  | 93.6   | FGL1      | <a href="#">NM_004467.3</a> | HFREP1;HP-041;LFIRE1;MGC12455    | fibrinogen   | fibrinogen  |              |
| GI_42544190-I | 128.9  | 143.9  | 142.9  | LGALS8    | <a href="#">NM_201544.1</a> | Gal-8;PCTA-1;Po66-CBP            | lectin [goid | extracellul | oncogene     |
| GI_42544192-I | 120.1  | 133.9  | 127.3  | LGALS8    | <a href="#">NM_201545.1</a> | Gal-8;PCTA-1;Po66-CBP            | lectin [goid | extracellul | oncogene     |
| GI_42544194-I | 290.3  | 234.8  | 222.8  | DIABLO    | <a href="#">NM_138930.2</a> | SMAC;SMAC3;DIABLO-               |              | mitochond   | caspase      |
| GI_42544195-I | 596.7  | 693.2  | 619.8  | DIABLO    | <a href="#">NM_019887.3</a> | SMAC;SMAC3;DIABLO-               |              | mitochond   | caspase      |
| GI_42544196-A | 566.6  | 619.6  | 602.4  | DIABLO    | <a href="#">NM_138929.2</a> | SMAC;SMAC3;DIABLO-               |              | mitochond   | caspase      |
| GI_42544197-A | 107.7  | 112.7  | 107.4  | FGL1      | <a href="#">NM_147203.2</a> | HFREP1;HP-041;LFIRE1;MGC12455    | fibrinogen   | fibrinogen  |              |
| GI_42544197-I | 114.4  | 122.2  | 105.5  | FGL1      | <a href="#">NM_147203.2</a> | HFREP1;HP-041;LFIRE1;MGC12455    | fibrinogen   | fibrinogen  |              |
| GI_42544203-I | 83.2   | 78.8   | 77     | TSLP      | <a href="#">NM_033035.3</a> |                                  |              |             |              |
| GI_42544204-A | 90.7   | 113.7  | 133.7  | TSLP      | <a href="#">NM_138551.2</a> |                                  |              |             |              |
| GI_42544204-I | 199.5  | 214    | 194    | TSLP      | <a href="#">NM_138551.2</a> |                                  |              |             |              |
| GI_42544205-S | 481.1  | 621.8  | 780.6  | VAMP3     | <a href="#">NM_004781.3</a> | CEB                              |              | synptoso    | vesicle      |
| GI_42544206-A | 105.7  | 105    | 110.3  | VAMP4     | <a href="#">NM_003762.2</a> | VAMP24                           |              | endosome    | protein      |
| GI_42544208-I | 277.7  | 230.2  | 211    | VAMP4     | <a href="#">NM_201994.1</a> | VAMP24                           |              | endosome    | protein      |
| GI_42544214-S | 149.9  | 144.7  | 111.9  | NDRG2     | <a href="#">NM_016250.2</a> | SYLD;KIAA1248                    | molecular    | cytosol     | cell         |
| GI_42544225-S | 620.4  | 825.7  | 792.2  | VPS18     | <a href="#">NM_020857.2</a> | KIAA1475                         | protein      | membran     | intracellula |
| GI_42544226-S | 546.1  | 526.7  | 621.3  | VPS33A    | <a href="#">NM_022916.3</a> | FLJ22395;FLJ23187                | protein      | membran     | protein      |
| GI_42544227-S | 95     | 94.7   | 93.2   | TNFRSF10D | <a href="#">NM_003840.3</a> | DCR2;TRUNDD;TRAILR4              | transmem     | integral to | anti-        |
| GI_42544228-I | 107    | 109.6  | 102.9  | TRAF2     | <a href="#">NM_021138.3</a> | TRAP;TRAP3;MGC:45012             | signal       |             | signal       |
| GI_42544229-S | 560.9  | 533.2  | 487.1  | TULP3     | <a href="#">NM_003324.3</a> | TUBL3;MGC45295                   |              |             |              |
| GI_42544230-S | 152.4  | 186.3  | 172.7  | LRRN5     | <a href="#">NM_006338.2</a> | GAC1;LRANK1                      | receptor     | integral to | cell         |
| GI_42544232-I | 118.8  | 125.7  | 103.4  | LRRN5     | <a href="#">NM_201630.1</a> | GAC1;LRANK1                      | receptor     | integral to | cell         |
| GI_42544234-S | 8545.9 | 7550.5 | 7581.6 | ACP33     | <a href="#">NM_016630.3</a> | MAST;GL010;SPG21;BM-019          | catalytic    |             |              |
| GI_42544235-S | 106.6  | 103.7  | 93.7   | B3GNT4    | <a href="#">NM_030765.2</a> | B3GN-T4;beta3Gn-T4               | galactosylt  | membran     | protein      |
| GI_42544236-S | 284    | 313.4  | 294.4  | CNOT3     | <a href="#">NM_014516.2</a> | NOT3;LENG2;NOT3H;KIAA0691        |              |             |              |
| GI_42544237-S | 189.1  | 190.3  | 176.4  | DCAMKL1   | <a href="#">NM_004734.2</a> | DCLK;KIAA0369                    | protein      | integral to | protein      |
| GI_42544238-S | 109.9  | 133.3  | 95.3   | DF        | <a href="#">NM_001928.2</a> | ADN                              | compleme     |             | compleme     |
| GI_42544240-S | 445.2  | 576.6  | 487    | IRX6      | <a href="#">NM_024335.2</a> | IRX7;IRX-3                       | transcripti  | nucleus     | regulation   |
| GI_42544242-S | 200.5  | 210.7  | 217.4  | DNM3      | <a href="#">NM_015569.2</a> | Dyna III;KIAA0820                | dynamini     |             | endocytosi   |
| GI_42544244-S | 149.1  | 159.8  | 149    | OTOS      | <a href="#">NM_148961.3</a> | OTOSP                            |              |             |              |
| GI_42544245-S | 1035.6 | 1317.8 | 1511.4 | SEPW1     | <a href="#">NM_003009.2</a> | selW                             | selenium     | cellular_co | biological_  |
| GI_42544246-S | 405.6  | 501.3  | 415.1  | WDR5B     | <a href="#">NM_019069.3</a> | FLJ11287;MGC49879                | signal       | heterotrim  | G-protein    |
| GI_42558242-S | 104.1  | 117.4  | 110.3  | LOC340351 | <a href="#">NM_178563.1</a> |                                  | carboxype    |             | proteolysis  |
| GI_42558244-S | 633.1  | 728.8  | 854.3  | GMRP-1    | <a href="#">NM_032320.4</a> | MGC13007                         | ion          |             |              |

|               |        |        |        |             |                             |                                     |             |             |             |
|---------------|--------|--------|--------|-------------|-----------------------------|-------------------------------------|-------------|-------------|-------------|
| GI_42558249-I | 1540.1 | 1945.8 | 1699.4 | M11S1       | <a href="#">NM_005898.3</a> | GPIAP1                              |             | integral to |             |
| GI_42558251-S | 324.8  | 376.2  | 348.2  | LOC118487   | <a href="#">NM_203298.1</a> |                                     |             |             |             |
| GI_42558253-S | 107.2  | 100.3  | 95.4   | MGC41945    | <a href="#">NM_203299.1</a> |                                     | DNA         | nucleus     | regulation  |
| GI_42558255-S | 382    | 442.3  | 600.1  | LOC147727   | <a href="#">NM_203300.1</a> |                                     |             |             |             |
| GI_42558257-S | 414.7  | 529.2  | 491.9  | FBXO33      | <a href="#">NM_203301.1</a> | c14_5247                            |             |             |             |
| GI_42558259-S | 81.4   | 76.8   | 74.9   | LOC389874   | <a href="#">NM_203303.1</a> |                                     |             | nucleic     |             |
| GI_42558261-S | 228.2  | 263    | 235.6  | RKHD1       | <a href="#">NM_203304.1</a> | Tino;KIAA2031;OK/SW-cl.4            |             | nucleic     |             |
| GI_42558263-S | 211.6  | 227    | 355.3  | MGC50853    | <a href="#">NM_203305.1</a> |                                     |             |             |             |
| GI_42558265-S | 105.7  | 119.3  | 100.3  | MGC34774    | <a href="#">NM_203308.1</a> |                                     |             |             |             |
| GI_42558267-S | 295.5  | 352.5  | 365.7  | MGC39606    | <a href="#">NM_203306.1</a> |                                     |             |             |             |
| GI_42558269-S | 131.4  | 132.1  | 127.9  | MGC48595    | <a href="#">NM_203309.1</a> |                                     |             |             |             |
| GI_42558278-S | 87.1   | 90.5   | 76.1   | TUBB8-pendi | <a href="#">NM_177987.1</a> |                                     | GTP         | microtubul  | microtubul  |
| GI_42558280-S | 625    | 722.6  | 598.5  | LOC220869   | <a href="#">NM_201453.1</a> |                                     |             |             |             |
| GI_42560226-I | 4210.2 | 2441.3 | 2667.6 | RBPSUH      | <a href="#">NM_005349.2</a> | csI;CBF1;KBF2;RBP-                  | tyrosine-   | nucleus     | DNA         |
| GI_42560228-A | 1733.3 | 1368.2 | 1162.4 | RBPSUH      | <a href="#">NM_015874.3</a> | csI;CBF1;KBF2;RBP-                  | tyrosine-   | nucleus     | DNA         |
| GI_42560230-I | 248.7  | 264.8  | 250.7  | PVRL1       | <a href="#">NM_203285.1</a> | ED4;PRR;HIgR;HVEC;PRR1;PVRR;CD111;P | coreceptor  | membran     | virulence   |
| GI_42560232-I | 105.3  | 113.6  | 137.4  | PVRL1       | <a href="#">NM_203286.1</a> | ED4;PRR;HIgR;HVEC;PRR1;PVRR;CD111;P | coreceptor  | membran     | virulence   |
| GI_42560234-S | 109.7  | 105.7  | 105.4  | PSG4        | <a href="#">NM_002780.2</a> | PSG9                                | plasma      | extracellul | pregnancy   |
| GI_42560236-I | 115.7  | 119.5  | 109.7  | PVRL1       | <a href="#">NM_002855.3</a> | ED4;PRR;HIgR;HVEC;PRR1;PVRR;CD111;P | coreceptor  | membran     | virulence   |
| GI_42560238-S | 2001.2 | 2185.6 | 2054.2 | PRKAG1      | <a href="#">NM_002733.2</a> | MGC8666                             | cAMP-       |             | protein     |
| GI_42560239-I | 162.8  | 199.1  | 183.1  | PSG11       | <a href="#">NM_002785.2</a> | PSG13;PSG14;MGC22484                | plasma      | extracellul | pregnancy   |
| GI_42560241-I | 94.4   | 88.3   | 91.8   | POU5F1      | <a href="#">NM_203289.1</a> | OCT3;OTF3;OTF4;Oct4;MGC22487        | transcripti | nucleus     | embryoge    |
| GI_42560243-S | 110.1  | 107.5  | 103.5  | PPIG        | <a href="#">NM_004792.2</a> | CYP;SRCyp;CARS-Cyp                  | cyclophilin | nucleoplas  | mRNA        |
| GI_42560245-I | 2347.5 | 2137.8 | 1882.7 | POLR1C      | <a href="#">NM_203290.1</a> | RPA5;RPA39;RPA40;RPAC1              | DNA-        | RNA         | transcripti |
| GI_42560247-A | 91.4   | 97.3   | 98.7   | POU5F1      | <a href="#">NM_002701.2</a> | OCT3;OTF3;OTF4;Oct4;MGC22487        | transcripti | nucleus     | embryoge    |
| GI_42560249-A | 546.1  | 539.8  | 476.1  | POLR1C      | <a href="#">NM_004875.2</a> | RPA5;RPA39;RPA40;RPAC1              | DNA-        | RNA         | transcripti |
| GI_42600568-S | 931    | 952.3  | 794.6  | LOC389903   | <a href="#">NM_203311.1</a> |                                     | DNA         | nucleus     | regulation  |
| GI_42627874-S | 165.6  | 168.6  | 147.8  | CDON        | <a href="#">NM_016952.2</a> | CDO;ORCAM                           | tumor       |             | cell        |
| GI_42627890-S | 111.7  | 111.4  | 105.9  | MGC35402    | <a href="#">NM_203307.1</a> | FLJ39509                            |             |             |             |
| GI_42655578-S | 226.6  | 297.9  | 249.4  | LOC400768   | <a href="#">XM_378883.1</a> |                                     |             |             |             |
| GI_42655584-S | 102.6  | 90     | 85.9   | LOC388665   | <a href="#">XM_371281.2</a> |                                     |             |             |             |
| GI_42655585-S | 130.5  | 138.6  | 134.7  | LOC388666   | <a href="#">XM_371283.2</a> |                                     |             |             |             |
| GI_42655592-S | 479.1  | 510.2  | 519.7  | IKBKE       | <a href="#">XM_375834.1</a> |                                     |             |             |             |
| GI_42655597-S | 105.6  | 101.3  | 108.1  | LOC388732   | <a href="#">XM_373884.2</a> |                                     |             |             |             |
| GI_42655599-S | 430.6  | 345.5  | 431    | LOC400802   | <a href="#">XM_378933.1</a> |                                     |             |             |             |
| GI_42655601-S | 107.3  | 108.3  | 109.6  | LOC400803   | <a href="#">XM_378934.1</a> |                                     |             |             |             |
| GI_42655604-S | 137.7  | 166    | 144.5  | LOC388734   | <a href="#">XM_371340.2</a> |                                     |             |             |             |
| GI_42655626-S | 155.3  | 181.7  | 160.8  | LOC400733   | <a href="#">XM_378835.1</a> |                                     |             |             |             |
| GI_42655642-S | 92.2   | 92.9   | 84.5   | LOC401938   | <a href="#">XM_377563.1</a> |                                     |             |             |             |
| GI_42655658-S | 134.5  | 149.2  | 128.8  | LOC401953   | <a href="#">XM_377593.1</a> |                                     |             |             |             |
| GI_42655662-S | 150    | 194.9  | 168.1  | LOC388649   | <a href="#">XM_371268.2</a> |                                     |             |             |             |
| GI_42655666-S | 351.6  | 450.6  | 385    | LOC400763   | <a href="#">XM_378879.1</a> |                                     |             |             |             |
| GI_42655672-S | 169.6  | 188.1  | 162.6  | LOC163404   | <a href="#">XM_375754.1</a> |                                     |             |             |             |
| GI_42655676-S | 136.2  | 145.8  | 136.9  | LOC400766   | <a href="#">XM_375756.1</a> |                                     |             |             |             |



|               |        |       |       |           |                             |            |             |          |
|---------------|--------|-------|-------|-----------|-----------------------------|------------|-------------|----------|
| GI_42655683-S | 1022.1 | 523   | 575.6 | NTNG1     | <a href="#">XM 375762.1</a> | structural | extracellul | axonogen |
| GI_42655687-S | 308.8  | 365.2 | 315.8 | LOC400741 | <a href="#">XM 378841.1</a> |            |             |          |
| GI_42655689-S | 141.7  | 170.3 | 149.3 | LOC400742 | <a href="#">XM 378842.1</a> |            |             |          |
| GI_42655693-S | 100.5  | 92    | 95.6  | LOC400743 | <a href="#">XM 378843.1</a> |            |             |          |
| GI_42655700-S | 230.9  | 273.9 | 251.9 | LOC401991 | <a href="#">XM 377635.1</a> |            |             |          |
| GI_42655722-S | 165.3  | 172.1 | 155.3 | LOC400785 | <a href="#">XM 375803.1</a> |            |             |          |
| GI_42655724-S | 83.4   | 96.2  | 85.1  | LOC400786 | <a href="#">XM 378901.1</a> |            |             |          |
| GI_42655735-S | 94.6   | 98.9  | 91.3  | LOC339442 | <a href="#">XM 378855.1</a> |            |             |          |
| GI_42655745-S | 97.7   | 104   | 108.9 | LOC400751 | <a href="#">XM 378859.1</a> |            |             |          |
| GI_42655748-S | 275.8  | 347.8 | 297.9 | LOC149478 | <a href="#">XM 378860.1</a> |            |             |          |
| GI_42655750-S | 491.5  | 622.3 | 606.2 | FLJ21156  | <a href="#">XM 371246.2</a> |            |             |          |
| GI_42655751-S | 241.1  | 291.1 | 266.8 | LOC400752 | <a href="#">XM 378861.1</a> |            |             |          |
| GI_42655756-S | 135.5  | 156.6 | 146.7 | LOC400753 | <a href="#">XM 378862.1</a> |            |             |          |
| GI_42655764-S | 117.9  | 110.7 | 108.6 | LOC388630 | <a href="#">XM 371250.2</a> |            |             |          |
| GI_42655775-S | 121.9  | 142.1 | 132.2 | LOC400754 | <a href="#">XM 375732.1</a> |            |             |          |
| GI_42655777-S | 227.9  | 296.1 | 261.9 | LOC400756 | <a href="#">XM 378865.1</a> |            |             |          |
| GI_42655779-S | 98.7   | 113.7 | 94.9  | LOC199899 | <a href="#">XM 378866.1</a> |            |             |          |
| GI_42655787-S | 97     | 108.8 | 104.6 | LOC339468 | <a href="#">XM 373847.2</a> |            |             |          |
| GI_42655803-S | 105.2  | 108.4 | 89.1  | LOC388681 | <a href="#">XM 371299.2</a> |            |             |          |
| GI_42655807-S | 321.1  | 394   | 347.7 | LOC401964 | <a href="#">XM 377601.1</a> |            |             |          |
| GI_42655811-S | 140.2  | 185.7 | 171   | LOC388689 | <a href="#">XM 371306.2</a> |            |             |          |
| GI_42655813-S | 822.7  | 779.3 | 592.9 | LOC388690 | <a href="#">XM 373865.2</a> |            |             |          |
| GI_42655820-S | 314.4  | 400.7 | 355   | LOC400801 | <a href="#">XM 378930.1</a> |            |             |          |
| GI_42655832-S | 261.4  | 281.9 | 263   | LOC400747 | <a href="#">XM 375707.1</a> |            |             |          |
| GI_42655836-S | 103.6  | 99.4  | 91.6  | LOC401945 | <a href="#">XM 377579.1</a> |            |             |          |
| GI_42655845-S | 121.2  | 139.8 | 125.7 | KIAA0450  | <a href="#">XM 371214.2</a> |            |             |          |
| GI_42655847-S | 128    | 124.8 | 131   | LOC388586 | <a href="#">XM 373821.2</a> |            |             |          |
| GI_42655848-S | 122.8  | 110.3 | 97.3  | LOC115110 | <a href="#">XM 378828.1</a> |            |             |          |
| GI_42655850-S | 94.4   | 91.2  | 85.7  | LOC401936 | <a href="#">XM 377556.1</a> |            |             |          |
| GI_42655858-S | 152.4  | 139.3 | 145.2 | dJ383J4.3 | <a href="#">XM 371328.2</a> |            |             |          |
| GI_42655861-S | 213.2  | 252.8 | 221.9 | KIAA0492  | <a href="#">XM 378914.1</a> |            |             |          |
| GI_42655865-S | 126.3  | 142.8 | 120.9 | LOC400796 | <a href="#">XM 378917.1</a> |            |             |          |
| GI_42655881-S | 141.6  | 170.1 | 154   | LOC401976 | <a href="#">XM 377618.1</a> |            |             |          |
| GI_42655883-S | 112.5  | 115.6 | 96.7  | LOC400748 | <a href="#">XM 378852.1</a> |            |             |          |
| GI_42655888-S | 80.7   | 86.4  | 83.1  | LOC284551 | <a href="#">XM 375713.1</a> |            |             |          |
| GI_42655890-S | 703.8  | 830.1 | 627.1 | LOC400749 | <a href="#">XM 375714.1</a> |            |             |          |
| GI_42655896-S | 1594.9 | 861.2 | 565.7 | LOC85028  | <a href="#">XM 378848.1</a> |            |             |          |
| GI_42655900-S | 134.6  | 135.7 | 122   | LOC401947 | <a href="#">XM 377583.1</a> |            |             |          |
| GI_42655902-S | 111.6  | 119.8 | 100.6 | LOC400732 | <a href="#">XM 378831.1</a> |            |             |          |
| GI_42655923-S | 212.8  | 207.2 | 175.6 | LOC400810 | <a href="#">XM 375850.1</a> |            |             |          |
| GI_42655933-S | 120.2  | 141.5 | 106.2 | KIAA0459  | <a href="#">XM 375697.1</a> |            |             |          |
| GI_42655935-S | 1126.1 | 460.2 | 595.6 | LOC400745 | <a href="#">XM 375698.1</a> |            |             |          |
| GI_42655949-S | 247.1  | 335.2 | 282.3 | LOC284688 | <a href="#">XM 378912.1</a> |            |             |          |
| GI_42655951-S | 212.6  | 237.2 | 213.2 | LOC401974 | <a href="#">XM 377613.1</a> |            |             |          |

|               |       |       |       |           |                             |
|---------------|-------|-------|-------|-----------|-----------------------------|
| GI_42655953-S | 195.8 | 232.3 | 209.2 | LOC391130 | <a href="#">XM 372803.2</a> |
| GI_42655957-S | 80.7  | 91.2  | 84    | LOC400800 | <a href="#">XM 378925.1</a> |
| GI_42655967-S | 96.1  | 86.9  | 105.8 | LOC400759 | <a href="#">XM 375746.1</a> |
| GI_42655973-S | 110.9 | 105.5 | 106.4 | LOC149351 | <a href="#">XM 378876.1</a> |
| GI_42655977-S | 99.7  | 101   | 95.6  | LOC284475 | <a href="#">XM 378886.1</a> |
| GI_42655979-S | 150.3 | 200.6 | 177.5 | TBX15     | <a href="#">XM 371284.2</a> |
| GI_42655983-S | 838   | 737.7 | 643.3 | FLJ10359  | <a href="#">XM 375853.1</a> |
| GI_42655985-S | 100.3 | 92.1  | 94.8  | LOC388754 | <a href="#">XM 371351.2</a> |
| GI_42655988-S | 218.3 | 144.8 | 142.2 | FMN2      | <a href="#">XM 371352.2</a> |
| GI_42655994-S | 110.9 | 111.7 | 100.3 | LOC149134 | <a href="#">XM 378945.1</a> |
| GI_42655996-S | 115.7 | 123.3 | 95.4  | LOC400812 | <a href="#">XM 378946.1</a> |
| GI_42656002-S | 98    | 108.8 | 96.8  | LOC401990 | <a href="#">XM 377633.1</a> |
| GI_42656011-S | 214.9 | 229.9 | 209.4 | LOC400738 | <a href="#">XM 378837.1</a> |
| GI_42656018-S | 147.7 | 162.4 | 159.7 | LOC401939 | <a href="#">XM 377565.1</a> |
| GI_42656020-S | 108.8 | 118.8 | 104   | LOC401940 | <a href="#">XM 377566.1</a> |
| GI_42656047-S | 126.1 | 118.7 | 117.2 | LOC254099 | <a href="#">XM 378822.1</a> |
| GI_42656051-S | 96.8  | 104.5 | 96.5  | LOC401934 | <a href="#">XM 377555.1</a> |
| GI_42656055-S | 105.2 | 111.4 | 110.6 | LOC400729 | <a href="#">XM 378824.1</a> |
| GI_42656064-S | 111.1 | 136   | 112.4 | LOC400739 | <a href="#">XM 378838.1</a> |
| GI_42656066-S | 116.2 | 127.1 | 106.7 | LOC388597 | <a href="#">XM 373827.2</a> |
| GI_42656068-S | 362.4 | 361.3 | 288.3 | LOC400775 | <a href="#">XM 378892.1</a> |
| GI_42656072-S | 175.8 | 231   | 219   | LOC400776 | <a href="#">XM 375779.1</a> |
| GI_42656074-S | 118.8 | 126   | 101.8 | LOC388674 | <a href="#">XM 371292.2</a> |
| GI_42656084-S | 95.5  | 87.8  | 92.6  | LOC401995 | <a href="#">XM 377649.1</a> |
| GI_42656096-S | 87.2  | 87.5  | 80.7  | LOC400823 | <a href="#">XM 375882.1</a> |
| GI_42656099-S | 121.1 | 111.6 | 102.2 | LOC388775 | <a href="#">XM 301210.3</a> |
| GI_42656103-S | 127.8 | 120.1 | 118.7 | LOC400771 | <a href="#">XM 378890.1</a> |
| GI_42656107-S | 176.9 | 180.9 | 175   | LOC388618 | <a href="#">XM 371241.2</a> |
| GI_42656112-S | 123.6 | 119.3 | 116.9 | LOC400782 | <a href="#">XM 378898.1</a> |
| GI_42656118-S | 144.8 | 150   | 150.4 | LOC126669 | <a href="#">XM 375809.1</a> |
| GI_42656120-S | 242.6 | 298.2 | 268.6 | LOC400787 | <a href="#">XM 375810.1</a> |
| GI_42656126-S | 227.6 | 269.5 | 253.8 | LOC400789 | <a href="#">XM 378903.1</a> |
| GI_42656130-S | 96.6  | 102.3 | 93    | LOC400790 | <a href="#">XM 375814.1</a> |
| GI_42656138-S | 128.5 | 142.2 | 140.9 | LOC400792 | <a href="#">XM 375816.1</a> |
| GI_42656157-S | 119.4 | 121.4 | 113.3 | LOC400826 | <a href="#">XM 375897.1</a> |
| GI_42656181-S | 291.1 | 376.7 | 325.9 | LOC402008 | <a href="#">XM 377666.1</a> |
| GI_42656187-S | 552.9 | 664.4 | 623.4 | LOC400829 | <a href="#">XM 378955.1</a> |
| GI_42656189-S | 124.6 | 132.4 | 119.7 | LOC400945 | <a href="#">XM 379078.1</a> |
| GI_42656192-S | 200.8 | 215.7 | 220.6 | LOC400946 | <a href="#">XM 379079.1</a> |
| GI_42656195-S | 150.2 | 169.7 | 163.5 | LOC400947 | <a href="#">XM 379080.1</a> |
| GI_42656198-S | 116.6 | 105.9 | 100.9 | LOC402068 | <a href="#">XM 377732.1</a> |
| GI_42656202-S | 73.8  | 77.2  | 67.2  | LOC400997 | <a href="#">XM 379122.1</a> |
| GI_42656206-S | 263.6 | 236.4 | 222   | LOC400999 | <a href="#">XM 379123.1</a> |
| GI_42656225-S | 104.8 | 101.3 | 109.4 | LOC400990 | <a href="#">XM 379113.1</a> |

|               |       |       |       |           |                             |
|---------------|-------|-------|-------|-----------|-----------------------------|
| GI_42656234-S | 101.3 | 103.7 | 90.7  | LOC400991 | <a href="#">XM 376108.1</a> |
| GI_42656238-S | 99.8  | 98.4  | 93.1  | LOC150568 | <a href="#">XM 379117.1</a> |
| GI_42656242-S | 90.9  | 98.8  | 88    | LOC285000 | <a href="#">XM 379119.1</a> |
| GI_42656258-S | 145.7 | 169.9 | 149.3 | LOC401040 | <a href="#">XM 376191.1</a> |
| GI_42656260-S | 80.3  | 77.6  | 73    | LOC401041 | <a href="#">XM 379166.1</a> |
| GI_42656266-S | 365.7 | 495.3 | 483.8 | LOC391356 | <a href="#">XM 372919.2</a> |
| GI_42656280-S | 111.4 | 118.3 | 103.4 | LOC388939 | <a href="#">XM 371488.2</a> |
| GI_42656282-S | 370.6 | 457.4 | 417.4 | LOC285043 | <a href="#">XM 379085.1</a> |
| GI_42656284-S | 142.5 | 168.8 | 154.8 | LOC285045 | <a href="#">XM 379086.1</a> |
| GI_42656292-S | 127.5 | 117.1 | 124.2 | LOC388942 | <a href="#">XM 373981.2</a> |
| GI_42656293-S | 113.1 | 109.5 | 95.2  | LOC400950 | <a href="#">XM 376049.1</a> |
| GI_42656299-S | 125.2 | 133.7 | 132.4 | LOC400951 | <a href="#">XM 379089.1</a> |
| GI_42656301-S | 158.5 | 167.9 | 160.4 | LOC400952 | <a href="#">XM 376051.1</a> |
| GI_42656305-S | 97.4  | 121.3 | 105.4 | LOC400953 | <a href="#">XM 379094.1</a> |
| GI_42656311-S | 90.2  | 103.2 | 102.2 | LOC400955 | <a href="#">XM 379096.1</a> |
| GI_42656313-S | 96.9  | 117.2 | 109.6 | LOC400957 | <a href="#">XM 379097.1</a> |
| GI_42656315-S | 213.2 | 239.4 | 191.6 | LOC339803 | <a href="#">XM 379098.1</a> |
| GI_42656324-S | 139.3 | 158.6 | 144.9 | LOC400958 | <a href="#">XM 379100.1</a> |
| GI_42656331-S | 355.5 | 420.6 | 362.9 | LOC388957 | <a href="#">XM 371497.2</a> |
| GI_42656335-S | 125.4 | 110.8 | 110.7 | LOC400961 | <a href="#">XM 376062.1</a> |
| GI_42656342-S | 168.1 | 198.4 | 184.5 | LOC400962 | <a href="#">XM 376068.1</a> |
| GI_42656345-S | 290.8 | 389.1 | 328.1 | LOC400964 | <a href="#">XM 379106.1</a> |
| GI_42656348-S | 593.1 | 729.6 | 779.6 | LOC388969 | <a href="#">XM 371506.2</a> |
| GI_42656349-S | 86.1  | 103.3 | 97.5  | LOC400965 | <a href="#">XM 376072.1</a> |
| GI_42656351-S | 168.1 | 181.1 | 160.8 | LOC400967 | <a href="#">XM 376073.1</a> |
| GI_42656353-S | 217.9 | 283.2 | 254.1 | LOC400968 | <a href="#">XM 376074.1</a> |
| GI_42656357-S | 119.6 | 112.7 | 116.5 | LOC388976 | <a href="#">XM 371515.2</a> |
| GI_42656361-S | 169.6 | 195.5 | 194.3 | TTC7      | <a href="#">XM 372927.2</a> |
| GI_42656365-S | 142.2 | 177   | 144.7 | KIAA1940  | <a href="#">XM 377742.1</a> |
| GI_42656370-S | 116.4 | 106   | 108.2 | LOC402066 | <a href="#">XM 377725.1</a> |
| GI_42656372-S | 204.7 | 266.3 | 233.9 | LOC400937 | <a href="#">XM 379068.1</a> |
| GI_42656376-S | 220.2 | 274   | 223   | LOC391343 | <a href="#">XM 372911.2</a> |
| GI_42656385-S | 79.1  | 82.6  | 78    | LOC400984 | <a href="#">XM 376097.1</a> |
| GI_42656389-S | 89.6  | 94.1  | 89.8  | LOC400986 | <a href="#">XM 376100.1</a> |
| GI_42656395-S | 134.5 | 144.6 | 130.3 | LOC285033 | <a href="#">XM 379111.1</a> |
| GI_42656398-S | 113.2 | 108.5 | 111.3 | LOC375247 | <a href="#">XM 351473.3</a> |
| GI_42656400-S | 109.8 | 111.9 | 111.6 | LOC402090 | <a href="#">XM 377754.1</a> |
| GI_42656402-S | 73.6  | 81.9  | 69.1  | LOC391408 | <a href="#">XM 352463.2</a> |
| GI_42656416-S | 270.2 | 294.2 | 277.2 | LOC401044 | <a href="#">XM 379169.1</a> |
| GI_42656418-S | 91.3  | 89.6  | 83.9  | LOC401045 | <a href="#">XM 376195.1</a> |
| GI_42656435-S | 106   | 96.5  | 97.5  | LOC389047 | <a href="#">XM 371568.2</a> |
| GI_42656442-S | 140.2 | 156.8 | 139.2 | LOC401013 | <a href="#">XM 376142.1</a> |
| GI_42656450-S | 91.8  | 97.6  | 87.9  | LOC401014 | <a href="#">XM 379141.1</a> |
| GI_42656454-S | 129.8 | 157.1 | 135.8 | LOC402107 | <a href="#">XM 377771.1</a> |

|               |       |       |       |            |                             |
|---------------|-------|-------|-------|------------|-----------------------------|
| GI_42656461-S | 141.9 | 167.5 | 142.6 | LOC151121  | <a href="#">XM 379133.1</a> |
| GI_42656463-S | 163.3 | 189.1 | 160.6 | LOC401002  | <a href="#">XM 376125.1</a> |
| GI_42656465-S | 94.6  | 103.6 | 84.9  | LOC401003  | <a href="#">XM 376126.1</a> |
| GI_42656472-S | 167.4 | 225.5 | 191.3 | LOC344227  | <a href="#">XM 292982.4</a> |
| GI_42656479-S | 107.4 | 100.7 | 91.6  | LOC93463   | <a href="#">XM 376186.1</a> |
| GI_42656483-S | 105.7 | 136.8 | 104.8 | LOC401038  | <a href="#">XM 379163.1</a> |
| GI_42656489-S | 147.7 | 145.3 | 138.5 | DKFZP586K1 | <a href="#">XM 376189.1</a> |
| GI_42656493-S | 114.9 | 122.1 | 120.3 | LOC400940  | <a href="#">XM 376031.1</a> |
| GI_42656495-S | 121.4 | 128.2 | 120.6 | LOC400941  | <a href="#">XM 376032.1</a> |
| GI_42656498-S | 98.5  | 98.3  | 97    | LOC386597  | <a href="#">XM 379073.1</a> |
| GI_42656500-S | 155.2 | 165   | 157.7 | LOC339788  | <a href="#">XM 379074.1</a> |
| GI_42656509-S | 120.1 | 119.3 | 118.8 | LOC400943  | <a href="#">XM 376034.1</a> |
| GI_42656511-S | 135.5 | 164.2 | 141.3 | FAM10A3    | <a href="#">XM 015334.6</a> |
| GI_42656513-S | 366   | 428   | 412.2 | LOC400944  | <a href="#">XM 379077.1</a> |
| GI_42656521-S | 131.3 | 187.3 | 114.8 | KIAA1189   | <a href="#">XM 371576.2</a> |
| GI_42656533-S | 93.5  | 104.2 | 96.9  | LOC401020  | <a href="#">XM 379145.1</a> |
| GI_42656535-S | 102.7 | 125.6 | 108.9 | LOC401021  | <a href="#">XM 379146.1</a> |
| GI_42656537-S | 149.2 | 175.9 | 165.5 | LOC401022  | <a href="#">XM 379147.1</a> |
| GI_42656544-S | 116.9 | 118.7 | 105.8 | LOC401025  | <a href="#">XM 379149.1</a> |
| GI_42656546-S | 119   | 115   | 104.7 | FLJ25415   | <a href="#">XM 371586.2</a> |
| GI_42656547-S | 362.5 | 425   | 399.4 | LOC401026  | <a href="#">XM 376160.1</a> |
| GI_42656554-S | 146.3 | 155.7 | 125.8 | LOC401028  | <a href="#">XM 376162.1</a> |
| GI_42656560-S | 155.7 | 141.7 | 136.9 | KIAA1571   | <a href="#">XM 371590.2</a> |
| GI_42656574-S | 216.6 | 265   | 252.5 | LOC151300  | <a href="#">XM 379154.1</a> |
| GI_42656581-S | 119.9 | 125.7 | 113.9 | LOC401032  | <a href="#">XM 379156.1</a> |
| GI_42656583-S | 101.9 | 93.5  | 92    | CUL3       | <a href="#">XM 376176.1</a> |
| GI_42656589-S | 187.4 | 216.1 | 195   | LOC401033  | <a href="#">XM 379158.1</a> |
| GI_42656591-S | 97.3  | 98    | 89.5  | LOC151484  | <a href="#">XM 379159.1</a> |
| GI_42656593-S | 133.5 | 143.9 | 132.8 | LOC401034  | <a href="#">XM 376179.1</a> |
| GI_42656595-S | 135.5 | 173   | 137.8 | LOC401035  | <a href="#">XM 376180.1</a> |
| GI_42656598-S | 123.7 | 148   | 127.9 | KIF5C      | <a href="#">XM 377774.1</a> |
| GI_42656602-S | 108.6 | 119.5 | 122.7 | LOC402110  | <a href="#">XM 377778.1</a> |
| GI_42656611-S | 339.4 | 421.2 | 372.9 | LOC389090  | <a href="#">XM 371606.2</a> |
| GI_42656629-S | 779.6 | 822.2 | 573.3 | LOC402100  | <a href="#">XM 377761.1</a> |
| GI_42656635-S | 105.3 | 100.6 | 98.1  | LOC401072  | <a href="#">XM 376243.1</a> |
| GI_42656637-S | 169.3 | 199.2 | 179.6 | LOC401073  | <a href="#">XM 379197.1</a> |
| GI_42656639-S | 104.7 | 116.5 | 113.5 | LOC285286  | <a href="#">XM 379198.1</a> |
| GI_42656647-S | 295.4 | 348.2 | 301.5 | LOC401074  | <a href="#">XM 376247.1</a> |
| GI_42656649-S | 160.2 | 145   | 153.7 | LOC401075  | <a href="#">XM 376248.1</a> |
| GI_42656656-S | 113.4 | 140.4 | 122.9 | LOC401078  | <a href="#">XM 379200.1</a> |
| GI_42656658-S | 107   | 95.9  | 95    | LOC391544  | <a href="#">XM 372993.2</a> |
| GI_42656660-S | 318.7 | 298.6 | 306.8 | LOC401048  | <a href="#">XM 379171.1</a> |
| GI_42656664-S | 106.8 | 124   | 106.5 | LOC401049  | <a href="#">XM 379172.1</a> |
| GI_42656668-S | 88.5  | 87    | 88    | LOC401051  | <a href="#">XM 379174.1</a> |

|               |        |        |        |           |                              |
|---------------|--------|--------|--------|-----------|------------------------------|
| GI_42656670-S | 344.3  | 452.7  | 399.3  | LOC401052 | <a href="#">XM 379175.1</a>  |
| GI_42656673-S | 603.4  | 700.6  | 806.6  | KIAA0218  | <a href="#">XM 376203.1</a>  |
| GI_42656675-S | 130.1  | 153.1  | 153.7  | LOC401053 | <a href="#">XM 379177.1</a>  |
| GI_42656686-S | 97.4   | 105.6  | 105.2  | LOC152274 | <a href="#">XM 379179.1</a>  |
| GI_42656698-S | 172.1  | 219.6  | 183.9  | LOC401056 | <a href="#">XM 379180.1</a>  |
| GI_42656700-S | 124.4  | 140.2  | 141.8  | LOC401057 | <a href="#">XM 379181.1</a>  |
| GI_42656702-S | 111    | 103.6  | 99     | LOC401058 | <a href="#">XM 379182.1</a>  |
| GI_42656706-S | 144.7  | 136.4  | 170.5  | LOC401059 | <a href="#">XM 379184.1</a>  |
| GI_42656719-S | 91.7   | 90.2   | 88.9   | LOC401061 | <a href="#">XM 379189.1</a>  |
| GI_42656724-S | 161.6  | 159.3  | 151.2  | LOC401062 | <a href="#">XM 379190.1</a>  |
| GI_42656726-S | 85.2   | 105.6  | 87.2   | LOC401063 | <a href="#">XM 376225.1</a>  |
| GI_42656730-S | 156.2  | 154.3  | 126.7  | LOC401064 | <a href="#">XM 376227.1</a>  |
| GI_42656742-S | 188.4  | 189.5  | 191.1  | LOC285331 | <a href="#">XM 376238.1</a>  |
| GI_42656747-S | 134.5  | 160.6  | 138.2  | LOC285401 | <a href="#">XM 379195.1</a>  |
| GI_42656749-S | 85.3   | 102.2  | 85.2   | LOC401070 | <a href="#">XM 376241.1</a>  |
| GI_42656753-S | 95.9   | 109.6  | 96.9   | LOC402123 | <a href="#">XM 377797.1</a>  |
| GI_42656758-S | 162.8  | 205.5  | 175.6  | LOC401107 | <a href="#">XM 379244.1</a>  |
| GI_42656760-S | 130.7  | 157.8  | 144.4  | LOC401109 | <a href="#">XM 376292.1</a>  |
| GI_42656765-S | 185.6  | 196.9  | 179.7  | LOC220729 | <a href="#">XM 049575.11</a> |
| GI_42656771-S | 97.3   | 91.4   | 94.8   | LOC401106 | <a href="#">XM 379243.1</a>  |
| GI_42656783-S | 132.3  | 133.7  | 133.4  | LOC152225 | <a href="#">XM 379204.1</a>  |
| GI_42656787-S | 152.6  | 187.2  | 172.2  | LOC151658 | <a href="#">XM 379205.1</a>  |
| GI_42656794-S | 369.7  | 468.2  | 431.1  | LOC401082 | <a href="#">XM 376257.1</a>  |
| GI_42656796-S | 83.9   | 77.7   | 74.4   | LOC401083 | <a href="#">XM 376258.1</a>  |
| GI_42656799-S | 102.9  | 88.9   | 90.1   | LOC285194 | <a href="#">XM 379207.1</a>  |
| GI_42656819-S | 131    | 153.8  | 145.8  | LOC401086 | <a href="#">XM 379213.1</a>  |
| GI_42656821-S | 124.1  | 124.6  | 117.8  | LOC389147 | <a href="#">XM 371663.2</a>  |
| GI_42656822-S | 109.8  | 112.1  | 95.8   | KIAA1257  | <a href="#">XM 371664.2</a>  |
| GI_42656823-S | 118.7  | 134.4  | 119.9  | LOC401087 | <a href="#">XM 376267.1</a>  |
| GI_42656826-S | 132.6  | 149.4  | 130.1  | LOC339942 | <a href="#">XM 379214.1</a>  |
| GI_42656828-S | 106.2  | 111.4  | 103.1  | LOC132241 | <a href="#">XM 379215.1</a>  |
| GI_42656854-S | 127.1  | 260.1  | 312.7  | LOC401093 | <a href="#">XM 379228.1</a>  |
| GI_42656857-S | 3870.3 | 3864.6 | 3226.9 | LOC389168 | <a href="#">XM 371672.2</a>  |
| GI_42656866-S | 94.2   | 98.6   | 88.1   | LOC401097 | <a href="#">XM 376281.1</a>  |
| GI_42656872-S | 142.9  | 155    | 132.5  | LOC401099 | <a href="#">XM 379233.1</a>  |
| GI_42656874-S | 107.1  | 120.9  | 103    | LOC93556  | <a href="#">XM 376284.1</a>  |
| GI_42656878-S | 230    | 275    | 262    | LOC401100 | <a href="#">XM 376287.1</a>  |
| GI_42656881-S | 109    | 110.6  | 132.8  | LOC401101 | <a href="#">XM 379234.1</a>  |
| GI_42656883-S | 161.6  | 173.9  | 158.3  | LOC401103 | <a href="#">XM 379235.1</a>  |
| GI_42656889-S | 110.1  | 126    | 116.5  | LOC389185 | <a href="#">XM 374067.2</a>  |
| GI_42656890-S | 147.1  | 151.5  | 131.2  | LOC401104 | <a href="#">XM 379240.1</a>  |
| GI_42656892-S | 123.7  | 139.2  | 130.6  | LOC401105 | <a href="#">XM 376290.1</a>  |
| GI_42656896-S | 98.6   | 98.7   | 107.3  | OR5K1     | <a href="#">XM 372997.2</a>  |
| GI_42656900-S | 149.3  | 180.2  | 165.4  | LOC402136 | <a href="#">XM 377811.1</a>  |

|               |        |        |        |           |                             |
|---------------|--------|--------|--------|-----------|-----------------------------|
| GI_42656902-S | 98.1   | 88.7   | 94.2   | LOC402141 | <a href="#">XM 377815.1</a> |
| GI_42656906-S | 96.7   | 99.4   | 98.4   | LOC402148 | <a href="#">XM 377818.1</a> |
| GI_42656910-S | 290.2  | 300.5  | 269.7  | LOC402152 | <a href="#">XM 377820.1</a> |
| GI_42656912-S | 97.7   | 117.5  | 118.1  | LOC402155 | <a href="#">XM 377823.1</a> |
| GI_42656916-S | 102.3  | 105    | 100.7  | LOC389205 | <a href="#">XM 371692.2</a> |
| GI_42656931-S | 125.6  | 131.8  | 123.5  | LOC401144 | <a href="#">XM 379271.1</a> |
| GI_42656935-S | 111.5  | 120.1  | 105.1  | LOC285556 | <a href="#">XM 373030.2</a> |
| GI_42656939-S | 109    | 102.2  | 90.3   | LOC401147 | <a href="#">XM 376334.1</a> |
| GI_42656946-S | 139    | 163.2  | 160.2  | LOC401150 | <a href="#">XM 376338.1</a> |
| GI_42656948-S | 136.1  | 104    | 119    | LOC401151 | <a href="#">XM 379274.1</a> |
| GI_42656955-S | 429.6  | 472.2  | 456    | LOC389221 | <a href="#">XM 371705.2</a> |
| GI_42656959-S | 183.9  | 208.1  | 219.7  | LOC401154 | <a href="#">XM 376342.1</a> |
| GI_42656961-S | 453.2  | 374.6  | 417.4  | KIAA1109  | <a href="#">XM 371706.2</a> |
| GI_42656964-S | 416    | 543.7  | 465.5  | LOC401155 | <a href="#">XM 379276.1</a> |
| GI_42656977-S | 87.1   | 88     | 86.9   | LOC401156 | <a href="#">XM 379278.1</a> |
| GI_42656991-S | 111.2  | 104.3  | 90.9   | LOC401159 | <a href="#">XM 379287.1</a> |
| GI_42656993-S | 140    | 147.7  | 139.8  | LOC340017 | <a href="#">XM 379288.1</a> |
| GI_42656995-S | 238.3  | 254.8  | 247.8  | LOC201725 | <a href="#">XM 376349.1</a> |
| GI_42657007-S | 779.7  | 488.1  | 439.8  | LOC401135 | <a href="#">XM 379268.1</a> |
| GI_42657010-S | 107.1  | 111.1  | 104.7  | LOC389208 | <a href="#">XM 371695.2</a> |
| GI_42657014-S | 128.6  | 123.5  | 127.7  | LOC401160 | <a href="#">XM 376353.1</a> |
| GI_42657022-S | 123.8  | 115.3  | 122.4  | LOC389247 | <a href="#">XM 374099.2</a> |
| GI_42657024-S | 256.2  | 331.9  | 284.4  | LOC401163 | <a href="#">XM 379294.1</a> |
| GI_42657027-S | 102.6  | 106.4  | 95.5   | LOC285441 | <a href="#">XM 379295.1</a> |
| GI_42657029-S | 102.9  | 107.5  | 87.3   | LOC401164 | <a href="#">XM 379298.1</a> |
| GI_42657032-S | 134    | 154.9  | 137.9  | LOC401165 | <a href="#">XM 379299.1</a> |
| GI_42657041-S | 4932.3 | 4858.2 | 3516.4 | LOC402176 | <a href="#">XM 377841.1</a> |
| GI_42657043-S | 108.5  | 114.8  | 100.9  | LOC401112 | <a href="#">XM 379248.1</a> |
| GI_42657045-S | 97.4   | 99.9   | 82.5   | LOC401113 | <a href="#">XM 379249.1</a> |
| GI_42657047-S | 115.7  | 121.5  | 108.4  | LOC401114 | <a href="#">XM 376299.1</a> |
| GI_42657060-S | 252    | 302.7  | 234.9  | LOC401118 | <a href="#">XM 376301.1</a> |
| GI_42657062-S | 85.9   | 98.9   | 78.2   | LOC285484 | <a href="#">XM 376303.1</a> |
| GI_42657067-S | 101.9  | 114.4  | 96.8   | LOC401119 | <a href="#">XM 379255.1</a> |
| GI_42657071-S | 111.4  | 154.6  | 134    | LOC401117 | <a href="#">XM 379252.1</a> |
| GI_42657075-S | 114.6  | 104.2  | 114.7  | FLJ13105  | <a href="#">XM 376325.1</a> |
| GI_42657079-S | 101.8  | 101.2  | 110.4  | LOC401129 | <a href="#">XM 379265.1</a> |
| GI_42657088-S | 206.6  | 218.6  | 183.8  | LOC401130 | <a href="#">XM 376317.1</a> |
| GI_42657091-S | 104.1  | 99.6   | 100.2  | LOC401120 | <a href="#">XM 379256.1</a> |
| GI_42657095-S | 110    | 116.3  | 104.6  | LOC401122 | <a href="#">XM 376306.1</a> |
| GI_42657105-S | 76.6   | 78.2   | 78.1   | LOC285547 | <a href="#">XM 379258.1</a> |
| GI_42657107-S | 73.5   | 133.4  | 91.2   | LOC152742 | <a href="#">XM 379260.1</a> |
| GI_42657116-S | 174.7  | 159.7  | 144.1  | ZCCHC4    | <a href="#">XM 376310.1</a> |
| GI_42657118-S | 2654.4 | 2311.8 | 1481.6 | LOC389203 | <a href="#">XM 371691.2</a> |
| GI_42657137-S | 95.2   | 88.2   | 89     | LOC401137 | <a href="#">XM 376322.1</a> |

|               |       |       |       |           |                             |
|---------------|-------|-------|-------|-----------|-----------------------------|
| GI_42657147-S | 77.7  | 70.4  | 77.2  | LOC401166 | <a href="#">XM 376364.1</a> |
| GI_42657153-S | 149.1 | 165.9 | 152.5 | LOC401168 | <a href="#">XM 379303.1</a> |
| GI_42657158-S | 155.5 | 161.3 | 154.4 | LOC401169 | <a href="#">XM 379306.1</a> |
| GI_42657165-S | 157   | 189.9 | 171.5 | LOC401171 | <a href="#">XM 379309.1</a> |
| GI_42657172-S | 99.5  | 110.5 | 111.1 | LOC401172 | <a href="#">XM 376370.1</a> |
| GI_42657175-S | 84.2  | 100.7 | 97.6  | LOC401173 | <a href="#">XM 379313.1</a> |
| GI_42657177-S | 103.7 | 97.7  | 99.9  | LOC401174 | <a href="#">XM 376371.1</a> |
| GI_42657179-S | 106   | 109.7 | 117.6 | LOC134121 | <a href="#">XM 376372.1</a> |
| GI_42657181-S | 149   | 174.5 | 157.2 | LOC389271 | <a href="#">XM 374113.2</a> |
| GI_42657189-S | 92.8  | 101.3 | 85    | LOC401177 | <a href="#">XM 379320.1</a> |
| GI_42657192-S | 114.2 | 130.3 | 131.3 | LOC285626 | <a href="#">XM 379371.1</a> |
| GI_42657195-S | 120.6 | 135   | 126.6 | LOC285629 | <a href="#">XM 376440.1</a> |
| GI_42657197-S | 102.9 | 115   | 94.2  | LOC401216 | <a href="#">XM 379372.1</a> |
| GI_42657205-S | 97.3  | 100.3 | 89.8  | LOC257358 | <a href="#">XM 379373.1</a> |
| GI_42657207-S | 189.2 | 243.4 | 230.7 | LOC401217 | <a href="#">XM 376443.1</a> |
| GI_42657212-S | 885   | 961.5 | 822   | LOC401219 | <a href="#">XM 379377.1</a> |
| GI_42657216-S | 118.6 | 140.4 | 120.2 | LOC401221 | <a href="#">XM 376447.1</a> |
| GI_42657218-S | 282.6 | 310.8 | 306.2 | LOC389348 | <a href="#">XM 374151.2</a> |
| GI_42657219-S | 127   | 125.6 | 112.6 | LOC402235 | <a href="#">XM 377918.1</a> |
| GI_42657221-S | 142.6 | 168   | 146   | LOC402237 | <a href="#">XM 377919.1</a> |
| GI_42657223-S | 100.4 | 87.8  | 94    | LOC402238 | <a href="#">XM 377920.1</a> |
| GI_42657225-S | 177.7 | 174.7 | 237.8 | LOC401201 | <a href="#">XM 379343.1</a> |
| GI_42657229-S | 181.9 | 227.2 | 199.2 | LOC401202 | <a href="#">XM 376412.1</a> |
| GI_42657246-S | 116.8 | 113.6 | 126.3 | LOC153218 | <a href="#">XM 376433.1</a> |
| GI_42657252-S | 150.3 | 173.6 | 161.8 | LOC134466 | <a href="#">XM 376436.1</a> |
| GI_42657260-S | 127.5 | 129.3 | 114.9 | LOC402231 | <a href="#">XM 377911.1</a> |
| GI_42657279-S | 98.5  | 91.1  | 98.5  | LOC401208 | <a href="#">XM 376427.1</a> |
| GI_42657284-S | 218.7 | 272.7 | 269.5 | LOC340074 | <a href="#">XM 379355.1</a> |
| GI_42657286-S | 456.4 | 566.5 | 471.1 | LOC401210 | <a href="#">XM 379359.1</a> |
| GI_42657308-S | 373.4 | 415.6 | 345.3 | FLJ23563  | <a href="#">XM 371740.2</a> |
| GI_42657314-S | 87.9  | 94.7  | 81.6  | LOC401191 | <a href="#">XM 376387.1</a> |
| GI_42657316-S | 106.9 | 110.6 | 102.1 | LOC402214 | <a href="#">XM 377896.1</a> |
| GI_42657320-S | 92.5  | 104.7 | 97.5  | LOC340107 | <a href="#">XM 379321.1</a> |
| GI_42657324-S | 99.7  | 99.4  | 89.4  | LOC401178 | <a href="#">XM 379323.1</a> |
| GI_42657326-S | 320.5 | 383.2 | 355.9 | LOC340113 | <a href="#">XM 379324.1</a> |
| GI_42657330-S | 106.1 | 114.7 | 110.6 | LOC401180 | <a href="#">XM 379325.1</a> |
| GI_42657332-S | 99.3  | 108.2 | 95.5  | LOC401181 | <a href="#">XM 379326.1</a> |
| GI_42657334-S | 160.1 | 169.1 | 135.2 | LOC401182 | <a href="#">XM 379327.1</a> |
| GI_42657336-S | 100.9 | 116.4 | 104.8 | LOC401183 | <a href="#">XM 376379.1</a> |
| GI_42657338-S | 131   | 167.3 | 150.9 | LOC401184 | <a href="#">XM 379328.1</a> |
| GI_42657342-S | 159   | 171.1 | 170   | LOC389289 | <a href="#">XM 371738.2</a> |
| GI_42657343-S | 117.4 | 134.4 | 129.5 | LOC401185 | <a href="#">XM 379331.1</a> |
| GI_42657377-S | 116.8 | 99.6  | 108.6 | LOC401197 | <a href="#">XM 376403.1</a> |
| GI_42657380-S | 271.1 | 263   | 223.9 | LOC389302 | <a href="#">XM 374125.2</a> |

|               |         |        |        |           |                             |
|---------------|---------|--------|--------|-----------|-----------------------------|
| GI_42657383-S | 106.8   | 103.1  | 96.7   | RGNEF     | <a href="#">XM 376405.1</a> |
| GI_42657403-S | 97      | 91.7   | 100.6  | LOC401223 | <a href="#">XM 376453.1</a> |
| GI_42657405-S | 105.3   | 113.9  | 102    | LOC401224 | <a href="#">XM 376454.1</a> |
| GI_42657410-S | 153.1   | 184    | 161.9  | LOC401226 | <a href="#">XM 379382.1</a> |
| GI_42657439-S | 142.8   | 170.4  | 156.3  | LOC401270 | <a href="#">XM 376522.1</a> |
| GI_42657442-S | 656.2   | 583.4  | 627.2  | ZNF450    | <a href="#">XM 376525.1</a> |
| GI_42657446-S | 82.3    | 80.8   | 83.3   | LOC401271 | <a href="#">XM 376527.1</a> |
| GI_42657448-S | 98.2    | 96.8   | 109.3  | LOC285758 | <a href="#">XM 379430.1</a> |
| GI_42657462-S | 121.2   | 101.7  | 97.9   | LOC285735 | <a href="#">XM 379433.1</a> |
| GI_42657464-S | 306.4   | 385.8  | 336.6  | LOC284397 | <a href="#">XM 209180.4</a> |
| GI_42657465-S | 287.3   | 379    | 309.5  | LOC401274 | <a href="#">XM 376536.1</a> |
| GI_42657467-S | 118.6   | 123    | 122.7  | LOC154092 | <a href="#">XM 379434.1</a> |
| GI_42657477-S | 222.3   | 273.1  | 233.1  | LOC153910 | <a href="#">XM 379437.1</a> |
| GI_42657479-S | 139.7   | 138.7  | 127.9  | LOC285740 | <a href="#">XM 379438.1</a> |
| GI_42657484-S | 107.9   | 117.2  | 112.9  | LOC401277 | <a href="#">XM 379439.1</a> |
| GI_42657486-S | 123.2   | 150.2  | 127.6  | LOC401278 | <a href="#">XM 376541.1</a> |
| GI_42657490-S | 105.5   | 105.9  | 98.8   | LOC401279 | <a href="#">XM 379441.1</a> |
| GI_42657496-S | 169     | 186.9  | 175.6  | LOC401229 | <a href="#">XM 376461.1</a> |
| GI_42657498-S | 119.7   | 132.9  | 126.9  | LOC285766 | <a href="#">XM 379384.1</a> |
| GI_42657500-S | 133.2   | 147.1  | 138.9  | LOC285768 | <a href="#">XM 379386.1</a> |
| GI_42657502-S | 106.4   | 105.7  | 116.3  | LOC401230 | <a href="#">XM 379391.1</a> |
| GI_42657504-S | 169.5   | 191.5  | 167.6  | LOC401231 | <a href="#">XM 379392.1</a> |
| GI_42657508-S | 211.4   | 255.7  | 227.7  | MGC39372  | <a href="#">XM 376463.1</a> |
| GI_42657510-S | 163.2   | 180.3  | 171.5  | LOC401232 | <a href="#">XM 379393.1</a> |
| GI_42657528-S | 127.8   | 104.7  | 89.1   | ANKRD6    | <a href="#">XM 376519.1</a> |
| GI_42657536-S | 184     | 205.7  | 186.5  | LOC401287 | <a href="#">XM 379458.1</a> |
| GI_42657540-S | 280.7   | 323.4  | 311.3  | LOC401288 | <a href="#">XM 376557.1</a> |
| GI_42657549-S | 18306.1 | 16828  | 12458  | LOC389445 | <a href="#">XM 371857.2</a> |
| GI_42657555-S | 112.3   | 125.6  | 110.5  | LOC401283 | <a href="#">XM 379453.1</a> |
| GI_42657559-S | 95.8    | 117.4  | 98.4   | LOC401284 | <a href="#">XM 379454.1</a> |
| GI_42657565-S | 155     | 180.2  | 163.3  | LOC401289 | <a href="#">XM 379459.1</a> |
| GI_42657567-S | 127.5   | 135.1  | 128.4  | LOC401290 | <a href="#">XM 379460.1</a> |
| GI_42657572-S | 107.7   | 111.7  | 100    | LOC401234 | <a href="#">XM 379395.1</a> |
| GI_42657575-S | 195.4   | 202.7  | 226.3  | LOC221710 | <a href="#">XM 379396.1</a> |
| GI_42657577-S | 170.2   | 200.5  | 194.6  | LOC401236 | <a href="#">XM 376469.1</a> |
| GI_42657580-S | 608.8   | 1372.7 | 1182.6 | LOC401237 | <a href="#">XM 379398.1</a> |
| GI_42657582-S | 108.4   | 107.6  | 97.3   | LOC401238 | <a href="#">XM 376471.1</a> |
| GI_42657584-S | 95.9    | 94.7   | 98.4   | LOC401239 | <a href="#">XM 376472.1</a> |
| GI_42657607-S | 379.7   | 314.8  | 306.4  | LOC401245 | <a href="#">XM 379404.1</a> |
| GI_42657624-S | 224.5   | 238.8  | 199.5  | LOC401253 | <a href="#">XM 376491.1</a> |
| GI_42657630-S | 208.4   | 246.1  | 213    | LOC401256 | <a href="#">XM 379409.1</a> |
| GI_42657632-S | 305.6   | 368.4  | 331    | LOC401257 | <a href="#">XM 379410.1</a> |
| GI_42657636-S | 95.1    | 118.9  | 111    | LOC401258 | <a href="#">XM 379411.1</a> |
| GI_42657639-S | 105.1   | 113.4  | 113.1  | LOC401259 | <a href="#">XM 376498.1</a> |



|               |        |        |        |           |                             |
|---------------|--------|--------|--------|-----------|-----------------------------|
| GI_42657641-S | 110.1  | 163.5  | 96.3   | LOC401260 | <a href="#">XM 376499.1</a> |
| GI_42657645-S | 96.7   | 105.9  | 98.2   | LOC401261 | <a href="#">XM 379413.1</a> |
| GI_42657651-S | 235.1  | 275.4  | 244.3  | C6orf110  | <a href="#">XM 371822.2</a> |
| GI_42657661-S | 425.3  | 432.3  | 364.8  | LOC401264 | <a href="#">XM 379417.1</a> |
| GI_42657663-S | 166.8  | 197.4  | 179    | LOC401265 | <a href="#">XM 376508.1</a> |
| GI_42657667-S | 175.8  | 214.4  | 204.5  | LOC401291 | <a href="#">XM 379461.1</a> |
| GI_42657669-S | 133.4  | 154.9  | 135.7  | LOC401292 | <a href="#">XM 379462.1</a> |
| GI_42657671-S | 99.8   | 106.1  | 103.3  | LOC401293 | <a href="#">XM 376558.1</a> |
| GI_42657673-S | 108.8  | 119.8  | 113    | LOC401294 | <a href="#">XM 379463.1</a> |
| GI_42657675-S | 149.5  | 176    | 167.4  | LOC401295 | <a href="#">XM 376560.1</a> |
| GI_42657802-S | 98.5   | 109.2  | 99     | LOC389605 | <a href="#">XM 374242.2</a> |
| GI_42657830-S | 94.2   | 96.2   | 90     | USP42     | <a href="#">XM 376571.1</a> |
| GI_42657967-S | 340.9  | 326.1  | 300.8  | LOC401428 | <a href="#">XM 376715.1</a> |
| GI_42657971-S | 451.2  | 549.7  | 521.3  | KIAA1862  | <a href="#">XM 044212.5</a> |
| GI_42657986-S | 493.1  | 652.7  | 605.2  | LOC155036 | <a href="#">XM 376722.1</a> |
| GI_42658099-S | 82.4   | 91.4   | 72.8   | LOC401401 | <a href="#">XM 376668.1</a> |
| GI_42658141-S | 134.7  | 173.8  | 146.9  | LOC392736 | <a href="#">XM 374481.2</a> |
| GI_42658151-S | 92.9   | 89.9   | 84.1   | LOC402290 | <a href="#">XM 377959.1</a> |
| GI_42658173-S | 1663.7 | 1757.5 | 1750   | UNC84A    | <a href="#">XM 379766.1</a> |
| GI_42658179-S | 213.8  | 230.9  | 217.5  | LOC392617 | <a href="#">XM 374386.2</a> |
| GI_42658193-S | 83     | 99.7   | 88.3   | LOC402452 | <a href="#">XM 379775.1</a> |
| GI_42658197-S | 387    | 385    | 417.4  | LOC402454 | <a href="#">XM 379776.1</a> |
| GI_42658199-S | 86.7   | 99.8   | 102.7  | LOC402455 | <a href="#">XM 374713.2</a> |
| GI_42658205-S | 106.1  | 107.8  | 98.6   | LOC402458 | <a href="#">XM 379781.1</a> |
| GI_42658222-S | 104.7  | 105.3  | 99.3   | KIAA0960  | <a href="#">XM 374404.2</a> |
| GI_42658224-S | 133    | 158.1  | 159.6  | LOC392634 | <a href="#">XM 374405.2</a> |
| GI_42658226-S | 218.5  | 259.5  | 224.8  | LOC392636 | <a href="#">XM 374406.2</a> |
| GI_42658228-S | 154.2  | 151.6  | 145.1  | LOC402463 | <a href="#">XM 380089.1</a> |
| GI_42658230-S | 1156.5 | 982.4  | 1035.4 | LOC402464 | <a href="#">XM 379792.1</a> |
| GI_42658236-S | 98.3   | 103.4  | 90.1   | LOC402466 | <a href="#">XM 380091.1</a> |
| GI_42658240-S | 131.4  | 156.8  | 154.1  | LOC402469 | <a href="#">XM 379797.1</a> |
| GI_42658244-S | 247.8  | 297.2  | 264.3  | LOC285941 | <a href="#">XM 380092.1</a> |
| GI_42658248-S | 91.8   | 108.1  | 106.6  | LOC402471 | <a href="#">XM 380094.1</a> |
| GI_42658251-S | 333.8  | 368    | 348.8  | LOC402472 | <a href="#">XM 380095.1</a> |
| GI_42658255-S | 129.6  | 125.2  | 120.9  | LOC402473 | <a href="#">XM 380096.1</a> |
| GI_42658263-S | 113.1  | 131.1  | 124.4  | LOC89231  | <a href="#">XM 379802.1</a> |
| GI_42658265-S | 134.6  | 138.5  | 134.6  | LOC402476 | <a href="#">XM 380099.1</a> |
| GI_42658267-S | 104.2  | 130.6  | 106.2  | LOC402477 | <a href="#">XM 379803.1</a> |
| GI_42658274-S | 119.9  | 136.6  | 119.7  | LOC402480 | <a href="#">XM 380100.1</a> |
| GI_42658276-S | 185.5  | 236    | 218.2  | LOC402481 | <a href="#">XM 379809.1</a> |
| GI_42658279-S | 100.2  | 122.6  | 122.2  | LOC392887 | <a href="#">XM 374604.2</a> |
| GI_42658281-S | 92.9   | 124    | 106.6  | LOC402482 | <a href="#">XM 379812.1</a> |
| GI_42658283-S | 112.5  | 112.8  | 113.9  | LOC392661 | <a href="#">XM 374428.2</a> |
| GI_42658285-S | 129.9  | 137.5  | 132.1  | LOC402483 | <a href="#">XM 380103.1</a> |

|               |        |        |        |            |                             |
|---------------|--------|--------|--------|------------|-----------------------------|
| GI_42658289-S | 94.3   | 119.7  | 101.5  | LOC402485  | <a href="#">XM 380104.1</a> |
| GI_42658295-S | 472    | 566.5  | 456.5  | LOC402488  | <a href="#">XM 379818.1</a> |
| GI_42658301-S | 1046.7 | 491.8  | 401.2  | LOC285958  | <a href="#">XM 380105.1</a> |
| GI_42658308-S | 113.9  | 111.1  | 114.8  | LOC402493  | <a href="#">XM 380106.1</a> |
| GI_42658310-S | 99.9   | 103    | 100.9  | LOC402494  | <a href="#">XM 379827.1</a> |
| GI_42658312-S | 404.6  | 485    | 419.6  | LOC136288  | <a href="#">XM 374435.2</a> |
| GI_42658313-S | 451.7  | 409    | 704    | LOC402495  | <a href="#">XM 379830.1</a> |
| GI_42658326-S | 81.5   | 101    | 90     | LOC402504  | <a href="#">XM 380107.1</a> |
| GI_42658332-S | 103.7  | 104.7  | 101.5  | LOC402507  | <a href="#">XM 380109.1</a> |
| GI_42658342-S | 121.8  | 152.4  | 120.8  | LOC402512  | <a href="#">XM 380111.1</a> |
| GI_42658346-S | 83.8   | 116.6  | 91.3   | LOC402633  | <a href="#">XM 379986.1</a> |
| GI_42658358-S | 104.5  | 114.4  | 110.4  | LOC402639  | <a href="#">XM 379993.1</a> |
| GI_42658368-S | 102.8  | 111.8  | 106.3  | LOC402644  | <a href="#">XM 379998.1</a> |
| GI_42658370-S | 88.1   | 90.4   | 81.9   | LOC402645  | <a href="#">XM 379999.1</a> |
| GI_42658380-S | 110.9  | 122.3  | 111.4  | LOC402517  | <a href="#">XM 379844.1</a> |
| GI_42658384-S | 120.2  | 126.9  | 129.1  | LOC402519  | <a href="#">XM 379846.1</a> |
| GI_42658386-S | 112    | 112.8  | 126.2  | LOC402520  | <a href="#">XM 379847.1</a> |
| GI_42658402-S | 134.4  | 146.5  | 136.7  | LOC402528  | <a href="#">XM 380115.1</a> |
| GI_42658412-S | 110.7  | 122.4  | 118.8  | LOC402534  | <a href="#">XM 380118.1</a> |
| GI_42658426-S | 108.9  | 118.7  | 108.7  | LOC402541  | <a href="#">XM 379860.1</a> |
| GI_42658440-S | 656.8  | 652.7  | 511.2  | WBSCR24    | <a href="#">XM 379866.1</a> |
| GI_42658446-S | 149.6  | 164.5  | 156.9  | LOC402663  | <a href="#">XM 380007.1</a> |
| GI_42658452-S | 95.1   | 95.5   | 102.2  | LOC402668  | <a href="#">XM 380010.1</a> |
| GI_42658454-S | 130.3  | 141.8  | 124.3  | LOC402669  | <a href="#">XM 380011.1</a> |
| GI_42658480-S | 232.8  | 263.4  | 255    | LOC402557  | <a href="#">XM 380126.1</a> |
| GI_42658482-S | 279.5  | 290.2  | 289.1  | LOC402558  | <a href="#">XM 379879.1</a> |
| GI_42658486-S | 108.6  | 128.7  | 130.2  | LOC402559  | <a href="#">XM 379881.1</a> |
| GI_42658488-S | 222.8  | 237.8  | 201.6  | LOC402560  | <a href="#">XM 380127.1</a> |
| GI_42658496-S | 235.8  | 264.9  | 246    | LOC402563  | <a href="#">XM 380128.1</a> |
| GI_42658501-S | 86.4   | 92.5   | 89.9   | LOC402565  | <a href="#">XM 379887.1</a> |
| GI_42658506-S | 162.9  | 200.6  | 169.6  | FLJ34048   | <a href="#">XM 380131.1</a> |
| GI_42658518-S | 127.3  | 124.1  | 99.3   | LOC285989  | <a href="#">XM 379896.1</a> |
| GI_42658520-S | 138.9  | 138.4  | 139.6  | LOC402571  | <a href="#">XM 379897.1</a> |
| GI_42658525-S | 2227.6 | 2570.2 | 2599.9 | LOC392758  | <a href="#">XM 374498.2</a> |
| GI_42658538-S | 532.1  | 603.7  | 521.7  | DKFZP434A0 | <a href="#">XM 380018.1</a> |
| GI_42658544-S | 132.6  | 145.9  | 132.4  | LOC402677  | <a href="#">XM 380021.1</a> |
| GI_42658546-S | 91.4   | 100.1  | 105.8  | LOC402679  | <a href="#">XM 380022.1</a> |
| GI_42658560-S | 209.7  | 215.8  | 234.9  | LOC402577  | <a href="#">XM 379906.1</a> |
| GI_42658564-S | 794.8  | 977.1  | 751    | LOC402578  | <a href="#">XM 380135.1</a> |
| GI_42658570-S | 121.4  | 134.2  | 114.9  | LOC402581  | <a href="#">XM 379910.1</a> |
| GI_42658576-S | 114.7  | 109    | 124    | LOC340340  | <a href="#">XM 380137.1</a> |
| GI_42658582-S | 2117.7 | 2323.3 | 2149.5 | LOC402587  | <a href="#">XM 380139.1</a> |
| GI_42658584-S | 361.6  | 411.4  | 414.4  | LOC286009  | <a href="#">XM 379914.1</a> |
| GI_42658588-S | 87.2   | 97.2   | 98.8   | LOC402588  | <a href="#">XM 379917.1</a> |

|               |        |        |        |           |                             |
|---------------|--------|--------|--------|-----------|-----------------------------|
| GI_42658596-S | 100.2  | 103    | 96.6   | LOC402592 | <a href="#">XM 380143.1</a> |
| GI_42658602-S | 105.4  | 120.4  | 116.8  | LOC346653 | <a href="#">XM 379921.1</a> |
| GI_42658606-S | 150.8  | 106.7  | 129.8  | KIAA1170  | <a href="#">XM 379923.1</a> |
| GI_42658612-S | 255.1  | 289.3  | 275.5  | LOC392988 | <a href="#">XM 374650.2</a> |
| GI_42658616-S | 101    | 108.8  | 100.7  | LOC402597 | <a href="#">XM 380147.1</a> |
| GI_42658618-S | 287.7  | 345.9  | 298.3  | KIAA1466  | <a href="#">XM 374529.2</a> |
| GI_42658619-S | 1189.9 | 1091.1 | 1283.9 | NUP205    | <a href="#">XM 374530.2</a> |
| GI_42658623-S | 114.4  | 136.6  | 127.2  | LOC155006 | <a href="#">XM 379931.1</a> |
| GI_42658625-S | 418.7  | 674.1  | 800.9  | KIAA1549  | <a href="#">XM 379932.1</a> |
| GI_42658627-S | 169.1  | 210.9  | 183.4  | FLJ25778  | <a href="#">XM 379933.1</a> |
| GI_42658629-S | 230.1  | 257    | 270    | LOC402599 | <a href="#">XM 380149.1</a> |
| GI_42658637-S | 93.3   | 108.2  | 87.8   | LOC402603 | <a href="#">XM 380150.1</a> |
| GI_42658639-S | 1066   | 871.9  | 700.8  | LCHN      | <a href="#">XM 379938.1</a> |
| GI_42658643-S | 90.9   | 102.4  | 93.8   | LOC93432  | <a href="#">XM 379940.1</a> |
| GI_42658645-S | 3326.7 | 2712.8 | 2663.3 | LOC402617 | <a href="#">XM 380151.1</a> |
| GI_42658653-S | 287.5  | 322.4  | 292    | FLJ43692  | <a href="#">XM 379959.1</a> |
| GI_42658659-S | 86.4   | 86.3   | 86.6   | FLJ45737  | <a href="#">XM 379965.1</a> |
| GI_42658661-S | 117.8  | 134.5  | 108.9  | LOC402621 | <a href="#">XM 379966.1</a> |
| GI_42658663-S | 426.2  | 507.7  | 481.7  | KIAA0543  | <a href="#">XM 379967.1</a> |
| GI_42658665-S | 223.1  | 254.8  | 242.5  | C7orf32   | <a href="#">XM 379968.1</a> |
| GI_42658667-S | 166.5  | 192.4  | 173.3  | LOC90520  | <a href="#">XM 380152.1</a> |
| GI_42658669-S | 250    | 290.2  | 259.6  | LOC402622 | <a href="#">XM 380153.1</a> |
| GI_42658671-S | 118.8  | 135.8  | 120.8  | LOC402624 | <a href="#">XM 379970.1</a> |
| GI_42658673-S | 100.1  | 179.1  | 103.7  | LOC285972 | <a href="#">XM 380154.1</a> |
| GI_42658675-S | 286.3  | 402.2  | 366.2  | CSG1cA-T  | <a href="#">XM 379974.1</a> |
| GI_42658679-S | 97.8   | 114.7  | 101.5  | LOC402626 | <a href="#">XM 380155.1</a> |
| GI_42658683-S | 123.7  | 137.5  | 109.7  | LOC402628 | <a href="#">XM 379976.1</a> |
| GI_42658685-S | 142.1  | 161.2  | 128.7  | LOC402629 | <a href="#">XM 379977.1</a> |
| GI_42658687-S | 342.4  | 385.5  | 390.4  | LOC393073 | <a href="#">XM 374702.2</a> |
| GI_42658689-S | 110.7  | 113.5  | 105.9  | LOC402630 | <a href="#">XM 380157.1</a> |
| GI_42658709-S | 6447.7 | 6299.7 | 5378.5 | LOC402694 | <a href="#">XM 380042.1</a> |
| GI_42658711-S | 105.4  | 120    | 105.4  | LOC402695 | <a href="#">XM 380044.1</a> |
| GI_42658719-S | 111.2  | 129.6  | 116.7  | LOC402707 | <a href="#">XM 380055.1</a> |
| GI_42658723-S | 109.4  | 112.5  | 91.2   | LOC402709 | <a href="#">XM 380057.1</a> |
| GI_42658725-S | 169.7  | 210.7  | 188.5  | LOC402710 | <a href="#">XM 380059.1</a> |
| GI_42658745-S | 102.2  | 130.5  | 115.1  | LOC402720 | <a href="#">XM 380077.1</a> |
| GI_42658749-S | 108.4  | 126.7  | 113.2  | LOC402632 | <a href="#">XM 380159.1</a> |
| GI_42658751-S | 90.8   | 86.1   | 89     | LOC285888 | <a href="#">XM 379979.1</a> |
| GI_42658753-S | 160.2  | 177    | 164.1  | LOC155435 | <a href="#">XM 379980.1</a> |
| GI_42658755-S | 93.8   | 111    | 97.2   | LOC285889 | <a href="#">XM 380160.1</a> |
| GI_42658757-S | 222.1  | 207.5  | 177.9  | LOC392850 | <a href="#">XM 374590.2</a> |
| GI_42658761-S | 91.8   | 87.5   | 83.2   | LOC392852 | <a href="#">XM 374592.2</a> |
| GI_42658762-S | 79.4   | 86.8   | 75.4   | LOC154822 | <a href="#">XM 380162.1</a> |
| GI_42658769-S | 2213.5 | 1839.8 | 1925.7 | LOC401457 | <a href="#">XM 376761.1</a> |

|               |        |        |        |           |                             |
|---------------|--------|--------|--------|-----------|-----------------------------|
| GI_42658782-S | 2027.1 | 2569.4 | 2073.4 | LOC401483 | <a href="#">XM 376800.1</a> |
| GI_42658785-S | 114.7  | 125.1  | 106.3  | LOC401484 | <a href="#">XM 376801.1</a> |
| GI_42658797-S | 94     | 102.3  | 87.3   | LOC389607 | <a href="#">XM 372010.2</a> |
| GI_42658801-S | 97.6   | 105.2  | 107.6  | LOC401442 | <a href="#">XM 379543.1</a> |
| GI_42658807-S | 79.5   | 70.5   | 81.5   | LOC401445 | <a href="#">XM 379547.1</a> |
| GI_42658811-S | 139.6  | 151.5  | 147.3  | LOC401446 | <a href="#">XM 379548.1</a> |
| GI_42658837-S | 165.9  | 189.3  | 178.1  | LOC401479 | <a href="#">XM 376797.1</a> |
| GI_42658843-S | 140.9  | 144.7  | 154.5  | LOC389689 | <a href="#">XM 374283.2</a> |
| GI_42658845-S | 224.8  | 271.5  | 247    | LOC401480 | <a href="#">XM 379608.1</a> |
| GI_42658853-S | 194.2  | 210    | 210    | LOC389632 | <a href="#">XM 374251.2</a> |
| GI_42658863-S | 98.9   | 104.1  | 101.2  | LOC401456 | <a href="#">XM 379562.1</a> |
| GI_42658866-S | 539.5  | 730.9  | 402.6  | MTSG1     | <a href="#">XM 372031.2</a> |
| GI_42658872-S | 156.9  | 151.1  | 141    | LOC349196 | <a href="#">XM 379551.1</a> |
| GI_42658875-S | 93.6   | 91     | 94.6   | LOC389628 | <a href="#">XM 374249.2</a> |
| GI_42658877-S | 122.4  | 141.9  | 129.5  | LOC401449 | <a href="#">XM 379552.1</a> |
| GI_42658879-S | 114.2  | 124.3  | 111.6  | LOC401450 | <a href="#">XM 376746.1</a> |
| GI_42658881-S | 104.6  | 108.1  | 94     | LOC389622 | <a href="#">XM 372024.2</a> |
| GI_42658882-S | 163.1  | 193.5  | 161.9  | LOC401451 | <a href="#">XM 379553.1</a> |
| GI_42658884-S | 324.1  | 398.3  | 351.1  | LOC157273 | <a href="#">XM 379554.1</a> |
| GI_42658887-S | 134.1  | 144.5  | 141    | LOC401452 | <a href="#">XM 376750.1</a> |
| GI_42658896-S | 98.5   | 103.7  | 88.8   | LOC401485 | <a href="#">XM 376809.1</a> |
| GI_42658900-S | 92.6   | 92.4   | 83.2   | LOC389295 | <a href="#">XM 374123.2</a> |
| GI_42658907-S | 89.7   | 95.7   | 94.4   | LOC401468 | <a href="#">XM 376785.1</a> |
| GI_42658911-S | 2690.8 | 3029.5 | 2382.6 | LOC401470 | <a href="#">XM 376787.1</a> |
| GI_42658913-S | 212.9  | 266    | 234.1  | LOC286144 | <a href="#">XM 379592.1</a> |
| GI_42658917-S | 97.8   | 129.2  | 111.2  | LOC392255 | <a href="#">XM 373260.2</a> |
| GI_42658923-S | 168    | 225.9  | 191.7  | LOC401472 | <a href="#">XM 376791.1</a> |
| GI_42658925-S | 171    | 183.4  | 176.6  | LOC401473 | <a href="#">XM 379596.1</a> |
| GI_42658927-S | 137.5  | 163    | 141.5  | FLJ10489  | <a href="#">XM 379597.1</a> |
| GI_42658937-S | 121.8  | 120.2  | 122.6  | LOC401476 | <a href="#">XM 379603.1</a> |
| GI_42658939-S | 80.4   | 82.3   | 76.4   | LOC401477 | <a href="#">XM 379605.1</a> |
| GI_42658946-S | 126    | 143.4  | 136.2  | LOC401459 | <a href="#">XM 376771.1</a> |
| GI_42658949-S | 108    | 107    | 106.9  | LOC389659 | <a href="#">XM 374270.2</a> |
| GI_42658950-S | 136    | 149.5  | 142.7  | LOC401460 | <a href="#">XM 376774.1</a> |
| GI_42658952-S | 131    | 155.2  | 133    | LOC286177 | <a href="#">XM 379582.1</a> |
| GI_42658956-S | 106.6  | 92     | 90     | TOX       | <a href="#">XM 376776.1</a> |
| GI_42658960-S | 89.8   | 95.6   | 81.7   | LOC401462 | <a href="#">XM 379583.1</a> |
| GI_42658964-S | 95.2   | 89.7   | 88.6   | LOC286186 | <a href="#">XM 379586.1</a> |
| GI_42658975-S | 158.9  | 173    | 159.6  | SLC10A5   | <a href="#">XM 376781.1</a> |
| GI_42658984-S | 157.8  | 151.8  | 143.8  | LOC402343 | <a href="#">XM 378035.1</a> |
| GI_42658989-S | 90.9   | 93.5   | 87.4   | LOC389649 | <a href="#">XM 372037.2</a> |
| GI_42658991-S | 145.1  | 169.4  | 183.4  | FLJ32731  | <a href="#">XM 372038.2</a> |
| GI_42658994-S | 165.5  | 167.5  | 156.2  | LOC401557 | <a href="#">XM 379676.1</a> |
| GI_42658996-S | 168.3  | 190.2  | 174.2  | C9orf62   | <a href="#">XM 376924.1</a> |

|               |        |        |        |           |                             |
|---------------|--------|--------|--------|-----------|-----------------------------|
| GI_42658998-S | 128.4  | 165.9  | 143.8  | LOC401558 | <a href="#">XM 379677.1</a> |
| GI_42659002-S | 670.7  | 637.7  | 929    | LOC90120  | <a href="#">XM 379680.1</a> |
| GI_42659006-S | 111    | 127.4  | 104.4  | LOC402381 | <a href="#">XM 378089.1</a> |
| GI_42659008-S | 182.5  | 248.3  | 196.7  | LOC402382 | <a href="#">XM 378090.1</a> |
| GI_42659027-S | 92.7   | 91.2   | 80.3   | LOC401535 | <a href="#">XM 376885.1</a> |
| GI_42659031-S | 590.1  | 443.6  | 464.1  | LOC401536 | <a href="#">XM 379645.1</a> |
| GI_42659033-S | 220.7  | 210.8  | 182.7  | LOC401537 | <a href="#">XM 376888.1</a> |
| GI_42659039-S | 273.1  | 259.5  | 275.5  | LOC401560 | <a href="#">XM 376925.1</a> |
| GI_42659043-S | 105.2  | 107.4  | 96.8   | LOC401561 | <a href="#">XM 379682.1</a> |
| GI_42659048-S | 125.9  | 160.8  | 141.3  | LOC401562 | <a href="#">XM 376930.1</a> |
| GI_42659050-S | 104.8  | 126.9  | 104.3  | LOC401563 | <a href="#">XM 376931.1</a> |
| GI_42659054-S | 2474.8 | 2812.2 | 2424.4 | FUBP3     | <a href="#">XM 376917.1</a> |
| GI_42659063-S | 125    | 143.1  | 118.4  | LOC401508 | <a href="#">XM 376840.1</a> |
| GI_42659069-S | 92.3   | 95.5   | 88.9   | LOC402366 | <a href="#">XM 378063.1</a> |
| GI_42659078-S | 107.5  | 104.4  | 101.7  | LOC402367 | <a href="#">XM 378064.1</a> |
| GI_42659088-S | 88.2   | 103.8  | 90.9   | LOC401518 | <a href="#">XM 379638.1</a> |
| GI_42659101-S | 116.4  | 115.5  | 123.9  | LOC389749 | <a href="#">XM 372109.2</a> |
| GI_42659113-S | 384.6  | 475.1  | 409.4  | LOC401528 | <a href="#">XM 379642.1</a> |
| GI_42659115-S | 117.7  | 117.6  | 108.1  | LOC401529 | <a href="#">XM 376872.1</a> |
| GI_42659123-S | 101.7  | 111.2  | 102.5  | LOC401565 | <a href="#">XM 376939.1</a> |
| GI_42659130-S | 122.2  | 142.8  | 128    | LOC375719 | <a href="#">XM 372110.2</a> |
| GI_42659132-S | 149.4  | 172.6  | 154    | LOC401539 | <a href="#">XM 379648.1</a> |
| GI_42659140-S | 157.3  | 154.5  | 160.5  | LOC401568 | <a href="#">XM 376950.1</a> |
| GI_42659142-S | 196.2  | 221.8  | 205.2  | LOC286238 | <a href="#">XM 379684.1</a> |
| GI_42659144-S | 115.8  | 126.5  | 117.6  | LOC401487 | <a href="#">XM 376814.1</a> |
| GI_42659148-S | 136.3  | 146.5  | 125.4  | LOC401488 | <a href="#">XM 379617.1</a> |
| GI_42659154-S | 114.5  | 131.6  | 131.5  | LOC401491 | <a href="#">XM 379622.1</a> |
| GI_42659164-S | 116.3  | 125.4  | 115.1  | LOC401492 | <a href="#">XM 379623.1</a> |
| GI_42659167-S | 99.8   | 103.8  | 90     | LOC401494 | <a href="#">XM 376819.1</a> |
| GI_42659169-S | 134.5  | 132.8  | 120.4  | LOC401495 | <a href="#">XM 379625.1</a> |
| GI_42659172-S | 191    | 209.3  | 205    | C9orf14   | <a href="#">XM 376821.1</a> |
| GI_42659176-S | 111.8  | 125.2  | 101.1  | LOC401497 | <a href="#">XM 376822.1</a> |
| GI_42659178-S | 105.6  | 121.1  | 101.4  | LOC401498 | <a href="#">XM 376824.1</a> |
| GI_42659182-S | 958.7  | 631.4  | 676.3  | LOC401500 | <a href="#">XM 379629.1</a> |
| GI_42659193-S | 337.3  | 416.5  | 379    | KIAA0258  | <a href="#">XM 376830.1</a> |
| GI_42659195-S | 225.5  | 266.2  | 231.6  | LOC401503 | <a href="#">XM 379630.1</a> |
| GI_42659199-S | 222.1  | 277.6  | 224.7  | LOC158376 | <a href="#">XM 379632.1</a> |
| GI_42659207-S | 7332.4 | 6656.3 | 6220.9 | LOC401505 | <a href="#">XM 376833.1</a> |
| GI_42659210-S | 130.2  | 150.4  | 147.5  | LOC401506 | <a href="#">XM 379635.1</a> |
| GI_42659216-S | 152.7  | 167.5  | 148.5  | LOC402357 | <a href="#">XM 378052.1</a> |
| GI_42659220-S | 98.5   | 92.6   | 85.9   | FLJ10232  | <a href="#">XM 378199.1</a> |
| GI_42659222-S | 97.2   | 109.3  | 99.7   | LOC401543 | <a href="#">XM 379656.1</a> |
| GI_42659238-S | 290.8  | 376.2  | 349.6  | LOC401547 | <a href="#">XM 376900.1</a> |
| GI_42659240-S | 102.9  | 122.7  | 94.9   | LOC389785 | <a href="#">XM 372137.2</a> |

|               |        |        |        |           |                             |
|---------------|--------|--------|--------|-----------|-----------------------------|
| GI_42659246-S | 124    | 156.4  | 149.9  | LOC286333 | <a href="#">XM 379665.1</a> |
| GI_42659248-S | 576.4  | 479.4  | 532.5  | KIAA0674  | <a href="#">XM 376903.1</a> |
| GI_42659254-S | 143    | 143.4  | 124.7  | LOC401550 | <a href="#">XM 379667.1</a> |
| GI_42659257-S | 120.6  | 119.7  | 124.2  | LOC389789 | <a href="#">XM 372140.2</a> |
| GI_42659267-S | 138.9  | 187.7  | 154.2  | LOC401552 | <a href="#">XM 379668.1</a> |
| GI_42659275-S | 283.2  | 335.4  | 305.8  | LOC389794 | <a href="#">XM 374306.2</a> |
| GI_42659277-S | 714.4  | 669.5  | 683.5  | LOC401553 | <a href="#">XM 379671.1</a> |
| GI_42659279-S | 95.1   | 94.4   | 87.3   | LOC401554 | <a href="#">XM 379672.1</a> |
| GI_42659293-S | 121    | 132.1  | 102.8  | LOC402377 | <a href="#">XM 378080.1</a> |
| GI_42659301-S | 229.4  | 346    | 306    | LOC389772 | <a href="#">XM 372128.2</a> |
| GI_42659317-S | 98.3   | 99.6   | 110.2  | LOC399763 | <a href="#">XM 374803.1</a> |
| GI_42659320-S | 119.8  | 154.7  | 136.5  | LOC170371 | <a href="#">XM 378226.1</a> |
| GI_42659322-S | 103.9  | 105.2  | 97.4   | LOC387726 | <a href="#">XM 373481.2</a> |
| GI_42659325-S | 98.7   | 109.6  | 107.9  | LOC399832 | <a href="#">XM 378259.1</a> |
| GI_42659327-S | 174.3  | 201.2  | 183.1  | LOC399833 | <a href="#">XM 378260.1</a> |
| GI_42659332-S | 123.2  | 122.7  | 111.6  | LOC399827 | <a href="#">XM 378255.1</a> |
| GI_42659341-S | 126.1  | 169.5  | 166    | LOC387694 | <a href="#">XM 370565.2</a> |
| GI_42659345-S | 99.3   | 98.8   | 86.9   | LOC170425 | <a href="#">XM 378240.1</a> |
| GI_42659368-S | 1172.5 | 1021.5 | 753.7  | PDCD11    | <a href="#">XM 374829.1</a> |
| GI_42659379-S | 110    | 108.2  | 103.9  | LOC399810 | <a href="#">XM 374832.1</a> |
| GI_42659381-S | 256.8  | 338.9  | 286.3  | LOC143188 | <a href="#">XM 378251.1</a> |
| GI_42659388-S | 94.3   | 105.9  | 99.8   | LOC387712 | <a href="#">XM 370577.2</a> |
| GI_42659391-S | 105    | 117.9  | 116.1  | LOC401647 | <a href="#">XM 377129.1</a> |
| GI_42659395-S | 130.6  | 147.9  | 138.3  | LOC387673 | <a href="#">XM 370555.2</a> |
| GI_42659399-S | 132.4  | 156.5  | 133.1  | LOC399747 | <a href="#">XM 374787.1</a> |
| GI_42659406-S | 88.1   | 91     | 88.9   | LOC389959 | <a href="#">XM 372312.2</a> |
| GI_42659420-S | 183.4  | 159.1  | 147.5  | LOC399818 | <a href="#">XM 374839.1</a> |
| GI_42659431-S | 173.8  | 167.4  | 155.6  | LOC399815 | <a href="#">XM 374836.1</a> |
| GI_42659437-S | 116.6  | 122    | 128.3  | LOC399706 | <a href="#">XM 378200.1</a> |
| GI_42659439-S | 84.5   | 80.7   | 90.5   | LOC282980 | <a href="#">XM 378201.1</a> |
| GI_42659443-S | 195.6  | 256.8  | 222    | LOC399708 | <a href="#">XM 378203.1</a> |
| GI_42659454-S | 95.3   | 101.7  | 100.1  | LOC399716 | <a href="#">XM 374767.1</a> |
| GI_42659459-S | 102.7  | 100.9  | 94.2   | LOC399717 | <a href="#">XM 378210.1</a> |
| GI_42659461-S | 100.9  | 105.6  | 101.1  | LOC254312 | <a href="#">XM 378211.1</a> |
| GI_42659463-S | 394.4  | 385.4  | 377.6  | USP6NL    | <a href="#">XM 374768.1</a> |
| GI_42659465-S | 121.5  | 135.8  | 123.8  | LOC399718 | <a href="#">XM 374769.1</a> |
| GI_42659468-S | 116.9  | 115.8  | 115.6  | LOC399719 | <a href="#">XM 374770.1</a> |
| GI_42659493-S | 112.1  | 121.8  | 113.2  | LOC399841 | <a href="#">XM 374854.1</a> |
| GI_42659497-S | 120.5  | 143    | 129    | LOC399768 | <a href="#">XM 378228.1</a> |
| GI_42659502-S | 204.2  | 269.4  | 235.8  | LOC283025 | <a href="#">XM 378230.1</a> |
| GI_42659511-S | 215.6  | 236.7  | 232.1  | LOC219690 | <a href="#">XM 378232.1</a> |
| GI_42659524-S | 294.5  | 363.3  | 303    | LOC399786 | <a href="#">XM 378236.1</a> |
| GI_42659526-S | 249    | 269.4  | 327.5  | LOC283050 | <a href="#">XM 378238.1</a> |
| GI_42659530-S | 1411.5 | 1430.7 | 1262.3 | LOC399788 | <a href="#">XM 374817.1</a> |

|               |        |        |       |           |                             |
|---------------|--------|--------|-------|-----------|-----------------------------|
| GI_42659532-S | 125.2  | 141    | 120.6 | LOC401644 | <a href="#">XM 377117.1</a> |
| GI_42659538-S | 112.2  | 105    | 109.3 | LOC387635 | <a href="#">XM 370532.2</a> |
| GI_42659544-S | 206.9  | 257.1  | 273.2 | ANKRD26   | <a href="#">XM 374779.1</a> |
| GI_42659549-S | 280.3  | 255.5  | 225.3 | LOC220906 | <a href="#">XM 374781.1</a> |
| GI_42659552-S | 135.7  | 118.3  | 113.1 | LOC387647 | <a href="#">XM 373451.2</a> |
| GI_42659560-S | 89.8   | 90.4   | 104.6 | LOC399737 | <a href="#">XM 378219.1</a> |
| GI_42659564-S | 98.8   | 102.2  | 76.5  | LOC387655 | <a href="#">XM 370545.2</a> |
| GI_42659567-S | 126.2  | 121.1  | 116.3 | LOC401638 | <a href="#">XM 377109.1</a> |
| GI_42659569-S | 134    | 157.2  | 140   | LOC401639 | <a href="#">XM 377110.1</a> |
| GI_42659571-S | 186.4  | 208.4  | 179.4 | LOC387720 | <a href="#">XM 370584.2</a> |
| GI_42659577-S | 157.7  | 192.1  | 172.7 | KIAA1377  | <a href="#">XM 374927.1</a> |
| GI_42659581-S | 258.1  | 219.8  | 237.3 | DNCH2     | <a href="#">XM 370652.2</a> |
| GI_42659583-S | 96.9   | 94.4   | 96.7  | KIAA1826  | <a href="#">XM 370653.2</a> |
| GI_42659588-S | 122.5  | 127.6  | 113   | LOC399948 | <a href="#">XM 374932.1</a> |
| GI_42659594-S | 109.7  | 123.4  | 110.5 | LOC399951 | <a href="#">XM 378309.1</a> |
| GI_42659596-S | 101.1  | 107    | 110.4 | LOC399954 | <a href="#">XM 378311.1</a> |
| GI_42659598-S | 105.3  | 120.4  | 103.2 | LOC283143 | <a href="#">XM 378312.1</a> |
| GI_42659606-S | 185.1  | 204.5  | 189.5 | LOC399955 | <a href="#">XM 378313.1</a> |
| GI_42659610-S | 176.7  | 212.7  | 201.1 | LOC399957 | <a href="#">XM 374937.1</a> |
| GI_42659614-S | 2055.2 | 1212.6 | 591.8 | LOC399959 | <a href="#">XM 378316.1</a> |
| GI_42659619-S | 215.8  | 247.3  | 232.2 | LOC399961 | <a href="#">XM 378317.1</a> |
| GI_42659621-S | 119.8  | 129.4  | 119.7 | LOC390271 | <a href="#">XM 372441.2</a> |
| GI_42659626-S | 195    | 222.8  | 206.2 | LOC399968 | <a href="#">XM 374945.1</a> |
| GI_42659631-S | 868    | 1043.6 | 927.5 | LOC399972 | <a href="#">XM 378321.1</a> |
| GI_42659634-S | 158.5  | 161.9  | 146.6 | LOC399975 | <a href="#">XM 374948.1</a> |
| GI_42659638-S | 1381.2 | 1636.9 | 1652  | LOC399979 | <a href="#">XM 374949.1</a> |
| GI_42659640-S | 113.9  | 110.7  | 111.5 | LOC399980 | <a href="#">XM 378326.1</a> |
| GI_42659644-S | 215.2  | 245    | 222.5 | LOC283177 | <a href="#">XM 378327.1</a> |
| GI_42659655-S | 95.7   | 119    | 99.3  | LOC399898 | <a href="#">XM 374885.1</a> |
| GI_42659661-S | 121.3  | 141.6  | 124.2 | MPEG1     | <a href="#">XM 166227.4</a> |
| GI_42659668-S | 135.6  | 148    | 153.1 | LOC399900 | <a href="#">XM 374890.1</a> |
| GI_42659673-S | 107.9  | 117.3  | 109.5 | LOC399904 | <a href="#">XM 374893.1</a> |
| GI_42659675-S | 222.5  | 306.1  | 275.6 | LOC387779 | <a href="#">XM 370632.2</a> |
| GI_42659678-S | 371.4  | 532.9  | 487.4 | LOC399909 | <a href="#">XM 374898.1</a> |
| GI_42659685-S | 229    | 375.7  | 317.6 | LOC399912 | <a href="#">XM 378297.1</a> |
| GI_42659687-S | 114.1  | 125.7  | 120.7 | LOC399913 | <a href="#">XM 374899.1</a> |
| GI_42659693-S | 119.9  | 133.4  | 115.6 | LOC387785 | <a href="#">XM 373507.2</a> |
| GI_42659694-S | 394.9  | 406.8  | 346.4 | LOC399917 | <a href="#">XM 374902.1</a> |
| GI_42659696-S | 113.6  | 116.8  | 117.5 | LOC390217 | <a href="#">XM 372420.2</a> |
| GI_42659698-S | 144    | 139    | 137   | LOC390148 | <a href="#">XM 372389.2</a> |
| GI_42659700-S | 114.7  | 110.9  | 117.4 | LOC401687 | <a href="#">XM 377200.1</a> |
| GI_42659708-S | 74.6   | 95.7   | 76.4  | LOC401694 | <a href="#">XM 377218.1</a> |
| GI_42659716-S | 97.1   | 121.7  | 100.3 | LOC399920 | <a href="#">XM 378300.1</a> |
| GI_42659718-S | 105    | 105.2  | 93.5  | LOC399921 | <a href="#">XM 374904.1</a> |

|               |         |        |        |            |                             |
|---------------|---------|--------|--------|------------|-----------------------------|
| GI_42659720-S | 158.8   | 138.8  | 140.3  | LOC399922  | <a href="#">XM 374905.1</a> |
| GI_42659724-S | 99.4    | 111.1  | 93     | LOC399924  | <a href="#">XM 378301.1</a> |
| GI_42659728-S | 1061.6  | 1040   | 710    | KIAA0280   | <a href="#">XM 370635.2</a> |
| GI_42659730-S | 206     | 264.2  | 225.9  | LOC399925  | <a href="#">XM 374909.1</a> |
| GI_42659734-S | 13314.1 | 13205  | 9489.2 | LOC399927  | <a href="#">XM 374911.1</a> |
| GI_42659736-S | 359     | 423.2  | 423.2  | XRRRA1     | <a href="#">XM 374912.1</a> |
| GI_42659738-S | 106.9   | 98.6   | 94.4   | LOC387789  | <a href="#">XM 373509.2</a> |
| GI_42659741-S | 107.8   | 115.1  | 107.9  | LOC283214  | <a href="#">XM 378303.1</a> |
| GI_42659743-S | 88.4    | 98.6   | 88.4   | LOC399930  | <a href="#">XM 378304.1</a> |
| GI_42659749-S | 96.1    | 116    | 90.2   | LOC399933  | <a href="#">XM 378305.1</a> |
| GI_42659777-S | 105.3   | 106.2  | 107.9  | LOC399940  | <a href="#">XM 374920.1</a> |
| GI_42659789-S | 142.5   | 161.9  | 158.6  | LOC399851  | <a href="#">XM 378266.1</a> |
| GI_42659791-S | 104.2   | 107.4  | 104.8  | LOC387743  | <a href="#">XM 373488.2</a> |
| GI_42659797-S | 364.1   | 446.9  | 384.9  | LOC387750  | <a href="#">XM 370607.2</a> |
| GI_42659804-S | 115.7   | 128.7  | 91.9   | LOC399865  | <a href="#">XM 378271.1</a> |
| GI_42659806-S | 194.6   | 229.2  | 233.7  | LOC399866  | <a href="#">XM 378272.1</a> |
| GI_42659808-S | 100.5   | 105.7  | 94.9   | LOC399867  | <a href="#">XM 378273.1</a> |
| GI_42659810-S | 96.3    | 104.3  | 101.4  | LOC387755  | <a href="#">XM 370613.2</a> |
| GI_42659814-S | 118.2   | 115.9  | 100.9  | LOC399872  | <a href="#">XM 378276.1</a> |
| GI_42659822-S | 111.5   | 128.9  | 129.7  | LOC399875  | <a href="#">XM 378279.1</a> |
| GI_42659824-S | 117.4   | 126.4  | 118.2  | LOC399876  | <a href="#">XM 378280.1</a> |
| GI_42659833-S | 110.2   | 119.2  | 111.7  | LOC399879  | <a href="#">XM 378283.1</a> |
| GI_42659836-S | 323     | 448.3  | 258.3  | LOC387763  | <a href="#">XM 373497.2</a> |
| GI_42659838-S | 80.3    | 93.2   | 88.3   | LOC399884  | <a href="#">XM 378286.1</a> |
| GI_42659840-S | 120.3   | 119.4  | 120.2  | LOC399886  | <a href="#">XM 378288.1</a> |
| GI_42659842-S | 945.2   | 1041.6 | 932.9  | DKFZp779MC | <a href="#">XM 374877.1</a> |
| GI_42659844-S | 731.5   | 749    | 636.7  | LOC114971  | <a href="#">XM 374879.1</a> |
| GI_42659846-S | 104.9   | 107.7  | 108.5  | LOC399888  | <a href="#">XM 374880.1</a> |
| GI_42659851-S | 95.8    | 90.1   | 112.6  | LOC399892  | <a href="#">XM 374882.1</a> |
| GI_42659855-S | 107.9   | 124.7  | 118.4  | LOC401660  | <a href="#">XM 377147.1</a> |
| GI_42659867-S | 155.7   | 166.1  | 158.8  | LOC390046  | <a href="#">XM 372351.2</a> |
| GI_42659871-S | 111.6   | 137.6  | 115    | LOC401667  | <a href="#">XM 377159.1</a> |
| GI_42659875-S | 117.5   | 138.5  | 139.4  | LOC401675  | <a href="#">XM 377179.1</a> |
| GI_42659883-S | 180.9   | 204.5  | 210    | LOC401681  | <a href="#">XM 377189.1</a> |
| GI_42659894-S | 98.3    | 102.5  | 94.7   | LOC256021  | <a href="#">XM 378372.1</a> |
| GI_42659896-S | 164.5   | 202.6  | 196.4  | LOC338809  | <a href="#">XM 378374.1</a> |
| GI_42659922-S | 107.1   | 111    | 88.9   | LOC400023  | <a href="#">XM 374972.1</a> |
| GI_42659925-S | 92.3    | 101.3  | 97.3   | LOC400025  | <a href="#">XM 374973.1</a> |
| GI_42659928-S | 630.8   | 877.6  | 917.2  | LOC400027  | <a href="#">XM 378350.1</a> |
| GI_42659930-S | 546.8   | 740.2  | 816.9  | ARID2      | <a href="#">XM 370690.2</a> |
| GI_42659933-S | 101.8   | 111.7  | 113.2  | LOC400030  | <a href="#">XM 378353.1</a> |
| GI_42659938-S | 120.6   | 145.3  | 122.3  | LOC387856  | <a href="#">XM 370691.2</a> |
| GI_42659944-S | 100.7   | 124.2  | 123.1  | LOC283332  | <a href="#">XM 378355.1</a> |
| GI_42659948-S | 101.9   | 113.3  | 110.9  | LOC283400  | <a href="#">XM 378356.1</a> |



|               |         |        |        |           |                             |
|---------------|---------|--------|--------|-----------|-----------------------------|
| GI_42659957-S | 132.8   | 140.7  | 127.6  | LOC400043 | <a href="#">XM 378360.1</a> |
| GI_42659974-S | 192.6   | 152.9  | 142.8  | LOC400047 | <a href="#">XM 378363.1</a> |
| GI_42659979-S | 123.2   | 120.5  | 131.9  | LOC400050 | <a href="#">XM 378365.1</a> |
| GI_42659981-S | 107.1   | 115.7  | 104.6  | LOC400051 | <a href="#">XM 378366.1</a> |
| GI_42659988-S | 268.9   | 322.3  | 283.9  | LOC401716 | <a href="#">XM 377262.1</a> |
| GI_42659994-S | 128.1   | 129.6  | 130    | LOC400092 | <a href="#">XM 378398.1</a> |
| GI_42659999-S | 98.4    | 99.3   | 90.5   | LOC399993 | <a href="#">XM 378336.1</a> |
| GI_42660011-S | 78.9    | 85.6   | 89.2   | LOC400002 | <a href="#">XM 378339.1</a> |
| GI_42660017-S | 394.6   | 476.4  | 354.4  | LOC400006 | <a href="#">XM 378342.1</a> |
| GI_42660032-S | 306.5   | 375.4  | 329.1  | LOC196415 | <a href="#">XM 378346.1</a> |
| GI_42660034-S | 1013.6  | 1209.6 | 1058.6 | LOC144363 | <a href="#">XM 370685.2</a> |
| GI_42660046-S | 94.2    | 97.4   | 93.8   | LOC400082 | <a href="#">XM 375004.1</a> |
| GI_42660048-S | 124.4   | 133.1  | 130.1  | LOC400083 | <a href="#">XM 375005.1</a> |
| GI_42660055-S | 101.4   | 99.2   | 101.7  | LOC400084 | <a href="#">XM 378389.1</a> |
| GI_42660057-S | 156.3   | 180.1  | 183.3  | LOC144678 | <a href="#">XM 378390.1</a> |
| GI_42660063-S | 100.6   | 101.6  | 88.9   | LOC400088 | <a href="#">XM 378393.1</a> |
| GI_42660065-S | 95.7    | 110.7  | 94.1   | LOC116437 | <a href="#">XM 378394.1</a> |
| GI_42660071-S | 107.3   | 124.8  | 114.6  | KIAA1110  | <a href="#">XM 370667.2</a> |
| GI_42660072-S | 110.9   | 124.5  | 117.2  | LOC399982 | <a href="#">XM 378328.1</a> |
| GI_42660076-S | 91.9    | 116.1  | 105.3  | LOC399984 | <a href="#">XM 378330.1</a> |
| GI_42660078-S | 145.4   | 177.8  | 160.8  | LOC399986 | <a href="#">XM 378331.1</a> |
| GI_42660080-S | 108.3   | 114.1  | 108.9  | LOC399987 | <a href="#">XM 378332.1</a> |
| GI_42660082-S | 82.9    | 88.4   | 89.2   | LOC399990 | <a href="#">XM 374952.1</a> |
| GI_42660098-S | 226.5   | 271.3  | 242.5  | KIAA1853  | <a href="#">XM 375000.1</a> |
| GI_42660100-S | 109.3   | 122.6  | 116    | LOC144742 | <a href="#">XM 378388.1</a> |
| GI_42660112-S | 118.9   | 117.5  | 114.4  | LOC144776 | <a href="#">XM 375033.1</a> |
| GI_42660116-S | 142.9   | 174.4  | 155.7  | LOC400154 | <a href="#">XM 378428.1</a> |
| GI_42660129-S | 277.1   | 282.7  | 298.8  | LOC387945 | <a href="#">XM 370732.2</a> |
| GI_42660137-S | 112.6   | 99.7   | 105    | LOC400099 | <a href="#">XM 378399.1</a> |
| GI_42660139-S | 3733    | 3733.9 | 2589   | LOC387902 | <a href="#">XM 370710.2</a> |
| GI_42660142-S | 25312.6 | 25818  | 19936  | LOC387908 | <a href="#">XM 370714.2</a> |
| GI_42660143-S | 125.2   | 141    | 125.4  | LOC400108 | <a href="#">XM 378404.1</a> |
| GI_42660151-S | 139.2   | 178    | 144    | LOC387915 | <a href="#">XM 373561.2</a> |
| GI_42660159-S | 190     | 187.7  | 168.2  | LOC400121 | <a href="#">XM 375018.1</a> |
| GI_42660164-S | 136.8   | 158.5  | 133.5  | LOC400123 | <a href="#">XM 378411.1</a> |
| GI_42660166-S | 93.9    | 106.3  | 93.6   | LOC400125 | <a href="#">XM 378412.1</a> |
| GI_42660173-S | 122.5   | 134.7  | 122    | LOC400131 | <a href="#">XM 378414.1</a> |
| GI_42660175-S | 153.9   | 167.9  | 154.1  | LOC400132 | <a href="#">XM 375023.1</a> |
| GI_42660188-S | 108     | 119.5  | 111.7  | LOC144766 | <a href="#">XM 378419.1</a> |
| GI_42660193-S | 182.2   | 209.4  | 171.9  | LOC387934 | <a href="#">XM 370729.2</a> |
| GI_42660196-S | 198.2   | 233.3  | 214.1  | LOC400145 | <a href="#">XM 375031.1</a> |
| GI_42660198-S | 468.6   | 460.1  | 426.3  | TBC1D4    | <a href="#">XM 375032.1</a> |
| GI_42660207-S | 77.2    | 92.6   | 84.7   | LOC400161 | <a href="#">XM 378434.1</a> |
| GI_42660209-S | 108.6   | 101.8  | 105.5  | LOC400163 | <a href="#">XM 378436.1</a> |

|               |       |       |       |            |                             |
|---------------|-------|-------|-------|------------|-----------------------------|
| GI_42660213-S | 231.8 | 256.4 | 227.2 | LOC400165  | <a href="#">XM 375038.1</a> |
| GI_42660215-S | 104.5 | 80.5  | 92.5  | LOC387949  | <a href="#">XM 370733.2</a> |
| GI_42660217-S | 98    | 113.6 | 101.8 | LOC400167  | <a href="#">XM 378439.1</a> |
| GI_42660219-S | 146.4 | 167.1 | 151.1 | LOC400169  | <a href="#">XM 375039.1</a> |
| GI_42660221-S | 127.9 | 133.8 | 128.5 | LOC401740  | <a href="#">XM 377305.1</a> |
| GI_42660224-S | 145   | 176.7 | 155.1 | LOC400171  | <a href="#">XM 378441.1</a> |
| GI_42660228-S | 148.9 | 156.8 | 153.3 | LOC400172  | <a href="#">XM 375041.1</a> |
| GI_42660230-S | 596.1 | 273   | 1299  | DKFZP434B0 | <a href="#">XM 375042.1</a> |
| GI_42660245-S | 149.2 | 198.9 | 159.8 | KIAA1305   | <a href="#">XM 370756.2</a> |
| GI_42660251-S | 127   | 121.2 | 106.1 | LOC387982  | <a href="#">XM 370760.2</a> |
| GI_42660254-S | 427.8 | 337.4 | 443.8 | LOC387984  | <a href="#">XM 170749.7</a> |
| GI_42660260-S | 89.7  | 109.1 | 90.6  | LOC400207  | <a href="#">XM 375076.1</a> |
| GI_42660264-S | 114.4 | 97    | 105   | LOC400208  | <a href="#">XM 378453.1</a> |
| GI_42660266-S | 112.1 | 126.6 | 103.1 | LOC283547  | <a href="#">XM 378454.1</a> |
| GI_42660274-S | 92.8  | 99.1  | 94    | LOC283551  | <a href="#">XM 378455.1</a> |
| GI_42660276-S | 111.7 | 129.4 | 120.9 | LOC400212  | <a href="#">XM 378456.1</a> |
| GI_42660279-S | 93.1  | 99.4  | 80.8  | LOC400213  | <a href="#">XM 378457.1</a> |
| GI_42660285-S | 411.4 | 459   | 369.1 | KIAA0831   | <a href="#">XM 375080.1</a> |
| GI_42660287-S | 339.8 | 199.5 | 242.6 | LOC400214  | <a href="#">XM 375081.1</a> |
| GI_42660289-S | 138.7 | 154.7 | 145.6 | LOC400216  | <a href="#">XM 378460.1</a> |
| GI_42660295-S | 70.9  | 66    | 85.2  | LOC400219  | <a href="#">XM 375084.1</a> |
| GI_42660301-S | 76.6  | 95.2  | 75.1  | ZBTB1      | <a href="#">XM 375086.1</a> |
| GI_42660303-S | 169.3 | 174.9 | 208.7 | PLEKHH1    | <a href="#">XM 375087.1</a> |
| GI_42660305-S | 121.2 | 130.3 | 121.3 | LOC400223  | <a href="#">XM 375088.1</a> |
| GI_42660310-S | 84.2  | 105.9 | 105.3 | LOC400224  | <a href="#">XM 375090.1</a> |
| GI_42660325-S | 260.3 | 356.8 | 294.6 | LOC400231  | <a href="#">XM 378467.1</a> |
| GI_42660329-S | 170.4 | 185.5 | 185.4 | LOC400234  | <a href="#">XM 378470.1</a> |
| GI_42660334-S | 224.9 | 253.2 | 249.3 | LOC400236  | <a href="#">XM 378472.1</a> |
| GI_42660336-S | 137.9 | 148.9 | 131.5 | LOC400238  | <a href="#">XM 378473.1</a> |
| GI_42660339-S | 187.9 | 174.6 | 153.7 | LOC400239  | <a href="#">XM 375101.1</a> |
| GI_42660343-S | 189.1 | 205.4 | 157.1 | LOC400242  | <a href="#">XM 378476.1</a> |
| GI_42660347-S | 181.5 | 208.9 | 194.5 | LOC388009  | <a href="#">XM 373604.2</a> |
| GI_42660350-S | 126.7 | 135.1 | 121.1 | LOC400249  | <a href="#">XM 378482.1</a> |
| GI_42660360-S | 115.5 | 145.2 | 132.2 | LOC145216  | <a href="#">XM 378487.1</a> |
| GI_42660363-S | 88.9  | 100.5 | 97.5  | LOC374569  | <a href="#">XM 370777.2</a> |
| GI_42660369-S | 104.7 | 106.2 | 105.1 | LOC400258  | <a href="#">XM 375108.1</a> |
| GI_42660371-S | 435.6 | 494.7 | 525.3 | LOC388022  | <a href="#">XM 370779.2</a> |
| GI_42660386-S | 139.9 | 186.4 | 168.9 | LOC401766  | <a href="#">XM 377337.1</a> |
| GI_42660388-S | 129.3 | 156.3 | 157.5 | KIAA0323   | <a href="#">XM 377338.1</a> |
| GI_42660390-S | 85.4  | 86.4  | 84.7  | LOC401778  | <a href="#">XM 377343.1</a> |
| GI_42660392-S | 125.9 | 131.7 | 117.1 | KIAA0602   | <a href="#">XM 377355.1</a> |
| GI_42660398-S | 170.6 | 297.7 | 169.4 | LOC283697  | <a href="#">XM 373624.2</a> |
| GI_42660407-S | 147.3 | 138.8 | 142.6 | LOC390561  | <a href="#">XM 372560.2</a> |
| GI_42660413-S | 170.4 | 207   | 202.8 | LOC388104  | <a href="#">XM 370848.2</a> |

|               |       |       |       |            |                             |
|---------------|-------|-------|-------|------------|-----------------------------|
| GI_42660416-S | 110.7 | 112.8 | 104.1 | LOC400350  | <a href="#">XM 378506.1</a> |
| GI_42660428-S | 111.6 | 128.1 | 124.8 | LOC145845  | <a href="#">XM 378507.1</a> |
| GI_42660430-S | 132.8 | 166.1 | 150.6 | LOC400359  | <a href="#">XM 375190.1</a> |
| GI_42660432-S | 97.7  | 93.6  | 98.2  | LOC400360  | <a href="#">XM 375191.1</a> |
| GI_42660434-S | 110.3 | 97.4  | 87.6  | LOC388113  | <a href="#">XM 373625.2</a> |
| GI_42660445-S | 285.9 | 307.5 | 243.2 | LOC400368  | <a href="#">XM 378511.1</a> |
| GI_42660448-S | 108.1 | 120.2 | 111.2 | LOC400369  | <a href="#">XM 378512.1</a> |
| GI_42660461-S | 115   | 146.9 | 104.6 | LOC283663  | <a href="#">XM 378514.1</a> |
| GI_42660475-S | 168   | 187.9 | 172.8 | LOC400382  | <a href="#">XM 375210.1</a> |
| GI_42660477-S | 166.4 | 178.3 | 170.6 | MGC4809    | <a href="#">XM 370870.2</a> |
| GI_42660481-S | 244.9 | 333.4 | 285   | LOC388131  | <a href="#">XM 373632.2</a> |
| GI_42660495-S | 100.7 | 108.4 | 100.6 | LOC283731  | <a href="#">XM 378525.1</a> |
| GI_42660501-S | 181.7 | 214.2 | 160.7 | LOC400398  | <a href="#">XM 378528.1</a> |
| GI_42660505-S | 103.6 | 102.6 | 99.7  | LOC388140  | <a href="#">XM 373636.2</a> |
| GI_42660507-S | 110.9 | 137.5 | 116.9 | LOC253044  | <a href="#">XM 378532.1</a> |
| GI_42660509-S | 213.2 | 279.4 | 247.2 | LOC390611  | <a href="#">XM 372581.2</a> |
| GI_42660513-S | 134   | 110   | 107.5 | LOC390616  | <a href="#">XM 372584.2</a> |
| GI_42660518-S | 85.5  | 112.7 | 90.3  | LOC400411  | <a href="#">XM 378535.1</a> |
| GI_42660520-S | 127.7 | 125.4 | 113.5 | MESDC2     | <a href="#">XM 370880.2</a> |
| GI_42660535-S | 126.3 | 141.6 | 131.2 | LOC401812  | <a href="#">XM 377377.1</a> |
| GI_42660537-S | 104.5 | 109.8 | 103.1 | LOC390575  | <a href="#">XM 372568.2</a> |
| GI_42660541-S | 95.9  | 92.8  | 90    | LOC401819  | <a href="#">XM 377388.1</a> |
| GI_42660543-S | 231.8 | 262   | 237.7 | LOC401820  | <a href="#">XM 377390.1</a> |
| GI_42660551-S | 329.4 | 489.8 | 406.8 | LOC388165  | <a href="#">XM 370897.2</a> |
| GI_42660553-S | 152.2 | 153.4 | 140.9 | LOC400435  | <a href="#">XM 375246.1</a> |
| GI_42660569-S | 174.5 | 243.6 | 218.8 | LOC283761  | <a href="#">XM 378542.1</a> |
| GI_42660572-S | 185.5 | 202.7 | 199.7 | MGC14386   | <a href="#">XM 370908.2</a> |
| GI_42660574-S | 137.2 | 174.5 | 135.7 | LOC400451  | <a href="#">XM 375260.1</a> |
| GI_42660578-S | 109.9 | 101.5 | 96.7  | LOC400454  | <a href="#">XM 375263.1</a> |
| GI_42660580-S | 95.2  | 112.8 | 82.4  | LOC283682  | <a href="#">XM 378544.1</a> |
| GI_42660582-S | 99    | 100.8 | 97.8  | LOC400456  | <a href="#">XM 378545.1</a> |
| GI_42660584-S | 144.7 | 172.3 | 141.5 | LOC145820  | <a href="#">XM 378546.1</a> |
| GI_42660586-S | 126.4 | 115.4 | 107.1 | LOC388179  | <a href="#">XM 373649.2</a> |
| GI_42660587-S | 95.9  | 93    | 93    | LOC388181  | <a href="#">XM 370910.2</a> |
| GI_42660598-S | 87.9  | 102.2 | 84.7  | LOC145814  | <a href="#">XM 372592.2</a> |
| GI_42660600-S | 162.5 | 192.1 | 150.4 | LOC400461  | <a href="#">XM 375266.1</a> |
| GI_42660606-S | 184.3 | 225.3 | 250.7 | LOC400464  | <a href="#">XM 375268.1</a> |
| GI_42660608-S | 132.7 | 148.1 | 129.9 | LOC400465  | <a href="#">XM 375269.1</a> |
| GI_42660610-S | 188.8 | 206.8 | 184.4 | LOC400296  | <a href="#">XM 375145.1</a> |
| GI_42660614-S | 111.8 | 112.5 | 96    | LOC400298  | <a href="#">XM 375147.1</a> |
| GI_42660619-S | 82.9  | 94.4  | 92.1  | LOC400301  | <a href="#">XM 375150.1</a> |
| GI_42660621-S | 186.7 | 229   | 184.1 | LOC400302  | <a href="#">XM 378493.1</a> |
| GI_42660627-S | 127.6 | 125.8 | 127.8 | LOC400307  | <a href="#">XM 378494.1</a> |
| GI_42660629-S | 250.6 | 319.2 | 262   | DKFZP547L1 | <a href="#">XM 375153.1</a> |

|               |       |        |        |           |                             |
|---------------|-------|--------|--------|-----------|-----------------------------|
| GI_42660632-S | 106.6 | 120.7  | 121    | LOC400309 | <a href="#">XM 375154.1</a> |
| GI_42660635-S | 195.9 | 243.3  | 215.7  | LOC388073 | <a href="#">XM 373616.2</a> |
| GI_42660640-S | 193.8 | 231.6  | 214    | LOC400314 | <a href="#">XM 378496.1</a> |
| GI_42660646-S | 165.9 | 157.9  | 167.6  | LOC388158 | <a href="#">XM 373641.2</a> |
| GI_42660656-S | 107.9 | 106.2  | 108.2  | LOC400431 | <a href="#">XM 375242.1</a> |
| GI_42660660-S | 103.3 | 111.6  | 101.2  | LOC401824 | <a href="#">XM 377394.1</a> |
| GI_42660666-S | 152.8 | 156.1  | 150.3  | LOC400320 | <a href="#">XM 375163.1</a> |
| GI_42660673-S | 97    | 99.8   | 93.7   | LOC401806 | <a href="#">XM 377369.1</a> |
| GI_42660677-S | 181.9 | 233.5  | 184.8  | LOC400336 | <a href="#">XM 375170.1</a> |
| GI_42660706-S | 96.8  | 111.7  | 92.4   | LOC400499 | <a href="#">XM 375302.1</a> |
| GI_42660720-S | 112   | 123.1  | 126.6  | LOC400505 | <a href="#">XM 378567.1</a> |
| GI_42660736-S | 105   | 113.4  | 115.3  | LOC146177 | <a href="#">XM 370944.2</a> |
| GI_42660740-S | 122.8 | 128.2  | 124.9  | LOC390684 | <a href="#">XM 372615.2</a> |
| GI_42660747-S | 253   | 341.7  | 289.7  | LOC283887 | <a href="#">XM 375316.1</a> |
| GI_42660751-S | 146.1 | 145.9  | 139.2  | LOC400512 | <a href="#">XM 378573.1</a> |
| GI_42660771-S | 113.6 | 111.8  | 105.8  | LOC400537 | <a href="#">XM 375357.1</a> |
| GI_42660776-S | 152.9 | 172.9  | 173.4  | LOC400538 | <a href="#">XM 378601.1</a> |
| GI_42660794-S | 382.7 | 534.7  | 499.2  | LOC388284 | <a href="#">XM 370984.2</a> |
| GI_42660799-S | 178.9 | 214    | 210.6  | LOC400542 | <a href="#">XM 375363.1</a> |
| GI_42660801-S | 109.3 | 125.4  | 111.9  | LOC400543 | <a href="#">XM 375364.1</a> |
| GI_42660803-S | 500.6 | 830.5  | 622.5  | LOC400544 | <a href="#">XM 378609.1</a> |
| GI_42660811-S | 134.4 | 149.3  | 131.5  | LOC401858 | <a href="#">XM 377439.1</a> |
| GI_42660817-S | 127.7 | 121.9  | 110.2  | LOC400535 | <a href="#">XM 378594.1</a> |
| GI_42660821-S | 395.1 | 458.8  | 410.5  | LOC400555 | <a href="#">XM 375379.1</a> |
| GI_42660823-S | 987.9 | 1181.5 | 1062.6 | MGC23284  | <a href="#">XM 378628.1</a> |
| GI_42660828-S | 108.2 | 113.7  | 91.7   | LOC400556 | <a href="#">XM 378629.1</a> |
| GI_42660832-S | 667.9 | 777    | 711.2  | LOC400558 | <a href="#">XM 378631.1</a> |
| GI_42660836-S | 115.7 | 116.7  | 112.2  | LOC400560 | <a href="#">XM 378632.1</a> |
| GI_42660838-S | 102.1 | 109.6  | 125.5  | LOC400561 | <a href="#">XM 378633.1</a> |
| GI_42660843-S | 101.3 | 110.7  | 108.7  | LOC400563 | <a href="#">XM 375384.1</a> |
| GI_42660850-S | 259   | 346.4  | 241.1  | LOC400565 | <a href="#">XM 378637.1</a> |
| GI_42660854-S | 188.4 | 224.9  | 185.5  | LOC146443 | <a href="#">XM 378558.1</a> |
| GI_42660858-S | 191.4 | 209.7  | 199.6  | KIAA1987  | <a href="#">XM 375298.1</a> |
| GI_42660870-S | 116.8 | 100.8  | 100.9  | LOC400496 | <a href="#">XM 378562.1</a> |
| GI_42660876-S | 208.1 | 230.1  | 220.9  | LOC400550 | <a href="#">XM 378620.1</a> |
| GI_42660878-S | 95.7  | 102.9  | 96.1   | LOC400551 | <a href="#">XM 378621.1</a> |
| GI_42660888-S | 128.1 | 184.3  | 156.9  | LOC400531 | <a href="#">XM 378586.1</a> |
| GI_42660890-S | 133.6 | 132.8  | 127.5  | LOC400532 | <a href="#">XM 378588.1</a> |
| GI_42660894-S | 120.7 | 115.4  | 128.5  | LOC146481 | <a href="#">XM 375353.1</a> |
| GI_42660903-S | 227.9 | 279.4  | 250.2  | LOC388295 | <a href="#">XM 373693.2</a> |
| GI_42660906-S | 102.6 | 132.5  | 128.5  | LOC400547 | <a href="#">XM 375373.1</a> |
| GI_42660914-S | 101.2 | 97.5   | 100.2  | LOC400548 | <a href="#">XM 378617.1</a> |
| GI_42660918-S | 130.5 | 131.9  | 137.1  | LOC401860 | <a href="#">XM 377445.1</a> |
| GI_42660922-S | 93.7  | 96.5   | 88.1   | LOC401862 | <a href="#">XM 377447.1</a> |

|               |       |        |        |           |                             |
|---------------|-------|--------|--------|-----------|-----------------------------|
| GI_42660932-S | 188.1 | 222.5  | 192.6  | LOC400516 | <a href="#">XM 378576.1</a> |
| GI_42660934-S | 301.1 | 401.3  | 289.5  | LOC400517 | <a href="#">XM 378577.1</a> |
| GI_42660936-S | 115.3 | 157.2  | 110.9  | LOC400518 | <a href="#">XM 378578.1</a> |
| GI_42660948-S | 91.1  | 91.7   | 89.8   | LOC400521 | <a href="#">XM 375331.1</a> |
| GI_42660952-S | 104   | 102.7  | 96.6   | LOC400522 | <a href="#">XM 378579.1</a> |
| GI_42660954-S | 255.6 | 294.2  | 279.6  | LOC283901 | <a href="#">XM 375334.1</a> |
| GI_42660956-S | 2207  | 2387.9 | 1967.8 | KIAA0220  | <a href="#">XM 290670.4</a> |
| GI_42660961-S | 124.4 | 132.2  | 123.2  | LOC400523 | <a href="#">XM 378582.1</a> |
| GI_42660981-S | 208.4 | 173.5  | 156    | LOC400528 | <a href="#">XM 375349.1</a> |
| GI_42660985-S | 174.5 | 200    | 188.1  | LOC401841 | <a href="#">XM 377423.1</a> |
| GI_42660987-S | 138.5 | 157.6  | 149.5  | LOC401842 | <a href="#">XM 377424.1</a> |
| GI_42660996-S | 101.4 | 107.8  | 103    | LOC400479 | <a href="#">XM 375282.1</a> |
| GI_42661000-S | 134.2 | 157.3  | 139.3  | LOC388197 | <a href="#">XM 373654.2</a> |
| GI_42661009-S | 159.3 | 208.9  | 163.7  | LOC400492 | <a href="#">XM 375292.1</a> |
| GI_42661014-S | 77    | 77.2   | 70.1   | LOC401828 | <a href="#">XM 377408.1</a> |
| GI_42661029-S | 328.6 | 426.2  | 361.5  | LOC400618 | <a href="#">XM 378700.1</a> |
| GI_42661031-S | 120.2 | 104.7  | 103.2  | LOC146795 | <a href="#">XM 378701.1</a> |
| GI_42661033-S | 115.9 | 199.3  | 171.3  | LOC400619 | <a href="#">XM 378703.1</a> |
| GI_42661035-S | 132.5 | 125.3  | 130.9  | LOC400620 | <a href="#">XM 378705.1</a> |
| GI_42661042-S | 145.6 | 270.3  | 371.1  | LOC400621 | <a href="#">XM 378706.1</a> |
| GI_42661044-S | 110.8 | 110.9  | 104.6  | LOC400622 | <a href="#">XM 375491.1</a> |
| GI_42661046-S | 91.5  | 100.6  | 88.5   | LOC400623 | <a href="#">XM 378708.1</a> |
| GI_42661057-S | 101.5 | 101.4  | 99.4   | LOC146713 | <a href="#">XM 378712.1</a> |
| GI_42661060-S | 300.8 | 214.8  | 167    | LOC400629 | <a href="#">XM 375502.1</a> |
| GI_42661065-S | 139.5 | 147.1  | 139.1  | LOC284009 | <a href="#">XM 378642.1</a> |
| GI_42661069-S | 260.3 | 297.1  | 299.4  | LOC400568 | <a href="#">XM 378643.1</a> |
| GI_42661071-S | 151.8 | 168    | 127.4  | LOC400569 | <a href="#">XM 375392.1</a> |
| GI_42661075-S | 108.5 | 126.9  | 114.4  | LOC388325 | <a href="#">XM 371007.2</a> |
| GI_42661079-S | 224.4 | 234.8  | 234.5  | LOC388327 | <a href="#">XM 371009.2</a> |
| GI_42661084-S | 190   | 180.6  | 189.3  | LOC400571 | <a href="#">XM 378646.1</a> |
| GI_42661092-S | 166.9 | 209.7  | 183.4  | LOC146850 | <a href="#">XM 375404.1</a> |
| GI_42661094-S | 96.8  | 123.7  | 102.2  | LOC400572 | <a href="#">XM 378648.1</a> |
| GI_42661096-S | 101.8 | 124    | 112.2  | USP43     | <a href="#">XM 371015.2</a> |
| GI_42661105-S | 136.2 | 136.4  | 120.1  | LOC400574 | <a href="#">XM 375410.1</a> |
| GI_42661107-S | 133.9 | 156.6  | 138.7  | LOC400575 | <a href="#">XM 378650.1</a> |
| GI_42661110-S | 94.1  | 120.8  | 95.6   | LOC400576 | <a href="#">XM 375412.1</a> |
| GI_42661114-S | 100   | 110.3  | 99.2   | LOC388341 | <a href="#">XM 371020.2</a> |
| GI_42661116-S | 85.1  | 89.3   | 89.3   | LOC390766 | <a href="#">XM 372658.2</a> |
| GI_42661141-S | 123.4 | 141    | 123.1  | NAP4      | <a href="#">XM 371052.2</a> |
| GI_42661147-S | 899.6 | 1108.3 | 982.1  | LOC388382 | <a href="#">XM 371054.2</a> |
| GI_42661149-S | 380.2 | 457.8  | 401.8  | LOC388384 | <a href="#">XM 373730.2</a> |
| GI_42661150-S | 104.9 | 116.3  | 100.4  | KRTAP4-9  | <a href="#">XM 373731.2</a> |
| GI_42661155-S | 194.2 | 211.9  | 181.5  | LOC400597 | <a href="#">XM 375453.1</a> |
| GI_42661157-S | 318.9 | 375.3  | 323.1  | LOC400598 | <a href="#">XM 378676.1</a> |

|               |        |        |        |           |                             |
|---------------|--------|--------|--------|-----------|-----------------------------|
| GI_42661159-S | 99.9   | 110.4  | 98.2   | LOC388387 | <a href="#">XM 373733.2</a> |
| GI_42661163-S | 109    | 116    | 114.3  | LOC388388 | <a href="#">XM 373734.2</a> |
| GI_42661167-S | 222.5  | 295.7  | 239.8  | LOC400600 | <a href="#">XM 378678.1</a> |
| GI_42661174-S | 204.7  | 240    | 249.6  | LOC201175 | <a href="#">XM 371057.2</a> |
| GI_42661175-S | 101.3  | 105.4  | 109.6  | LOC147080 | <a href="#">XM 378680.1</a> |
| GI_42661184-S | 2145.6 | 2520.7 | 2143.4 | KIAA0924  | <a href="#">XM 375471.1</a> |
| GI_42661187-S | 119.6  | 128.8  | 139.8  | LOC400603 | <a href="#">XM 378683.1</a> |
| GI_42661189-S | 101.1  | 108.4  | 102.1  | LOC400604 | <a href="#">XM 378684.1</a> |
| GI_42661191-S | 112.5  | 110.6  | 101.3  | LOC400605 | <a href="#">XM 378685.1</a> |
| GI_42661198-S | 96.3   | 104    | 92.5   | LOC339210 | <a href="#">XM 378687.1</a> |
| GI_42661202-S | 329.4  | 392.9  | 317.4  | LOC400608 | <a href="#">XM 375475.1</a> |
| GI_42661209-S | 160.8  | 107.8  | 101.1  | LOC400610 | <a href="#">XM 375478.1</a> |
| GI_42661213-S | 88     | 85.4   | 76.7   | LOC400612 | <a href="#">XM 378692.1</a> |
| GI_42661216-S | 85.1   | 89.4   | 85.5   | LOC400613 | <a href="#">XM 375482.1</a> |
| GI_42661220-S | 122    | 135.7  | 117.1  | LOC400614 | <a href="#">XM 378693.1</a> |
| GI_42661225-S | 1654.3 | 2602.5 | 2370.7 | LOC146784 | <a href="#">XM 378694.1</a> |
| GI_42661231-S | 260.3  | 307.6  | 264.4  | LOC401884 | <a href="#">XM 377476.1</a> |
| GI_42661235-S | 309.4  | 317.3  | 226.8  | LOC401886 | <a href="#">XM 377480.1</a> |
| GI_42661241-S | 120.7  | 172.6  | 138.3  | LOC400588 | <a href="#">XM 378664.1</a> |
| GI_42661251-S | 139.2  | 159.2  | 138.5  | LOC147004 | <a href="#">XM 378667.1</a> |
| GI_42661253-S | 177    | 209    | 184.8  | LOC400591 | <a href="#">XM 375436.1</a> |
| GI_42661257-S | 194.9  | 203.8  | 149.8  | MGC19764  | <a href="#">XM 371039.2</a> |
| GI_42661270-S | 123.6  | 133.1  | 113.7  | LOC388425 | <a href="#">XM 373753.2</a> |
| GI_42661274-S | 102.5  | 100.9  | 106.5  | AATK      | <a href="#">XM 375495.1</a> |
| GI_42661276-S | 514.9  | 618.7  | 571.1  | LOC400628 | <a href="#">XM 375496.1</a> |
| GI_42661292-S | 1714.4 | 1612.7 | 1328.8 | LOC400586 | <a href="#">XM 375424.1</a> |
| GI_42661295-S | 3016.4 | 3066.6 | 2130.6 | LOC400587 | <a href="#">XM 375426.1</a> |
| GI_42661299-S | 196.9  | 265.5  | 244.2  | LOC388358 | <a href="#">XM 373721.2</a> |
| GI_42661300-S | 99.4   | 120.5  | 103.9  | LOC400567 | <a href="#">XM 378639.1</a> |
| GI_42661305-S | 177    | 196.8  | 184.8  | LOC284100 | <a href="#">XM 375443.1</a> |
| GI_42661312-S | 155.8  | 148.7  | 137.4  | LOC388438 | <a href="#">XM 371089.2</a> |
| GI_42661314-S | 109.4  | 114.9  | 106.5  | LOC400630 | <a href="#">XM 378724.1</a> |
| GI_42661316-S | 230.9  | 296.8  | 258.7  | LOC388440 | <a href="#">XM 371092.2</a> |
| GI_42661335-S | 171.4  | 217.3  | 164.7  | LOC400638 | <a href="#">XM 378730.1</a> |
| GI_42661337-S | 88.8   | 109.2  | 102.2  | LOC388457 | <a href="#">XM 371105.2</a> |
| GI_42661344-S | 192.4  | 225.3  | 175.6  | LOC400642 | <a href="#">XM 378735.1</a> |
| GI_42661348-S | 163.5  | 314.2  | 632.1  | LOC400643 | <a href="#">XM 378738.1</a> |
| GI_42661353-S | 150.8  | 163    | 170.2  | LOC162835 | <a href="#">XM 091830.7</a> |
| GI_42661356-S | 104.5  | 116.6  | 115.8  | LOC284230 | <a href="#">XM 208185.3</a> |
| GI_42661360-S | 233.3  | 283.2  | 234.9  | LOC400644 | <a href="#">XM 378741.1</a> |
| GI_42661364-S | 131.5  | 145.3  | 133.5  | LOC401891 | <a href="#">XM 377488.1</a> |
| GI_42661366-S | 117.1  | 122.8  | 100.1  | LOC400662 | <a href="#">XM 378760.1</a> |
| GI_42661368-S | 112.4  | 108.3  | 107.1  | LOC284240 | <a href="#">XM 378763.1</a> |
| GI_42661374-S | 100.1  | 96.7   | 96.3   | LOC388471 | <a href="#">XM 371113.2</a> |

|               |       |       |       |            |                             |
|---------------|-------|-------|-------|------------|-----------------------------|
| GI_42661380-S | 334.9 | 440.8 | 366.3 | LOC400647  | <a href="#">XM 378743.1</a> |
| GI_42661387-S | 92.5  | 90.1  | 82.1  | LOC400648  | <a href="#">XM 378745.1</a> |
| GI_42661389-S | 399.8 | 578.6 | 444   | LOC400649  | <a href="#">XM 378746.1</a> |
| GI_42661395-S | 90.8  | 95.2  | 93.1  | LOC400650  | <a href="#">XM 375537.1</a> |
| GI_42661401-S | 144.4 | 147.4 | 122.7 | LOC400651  | <a href="#">XM 378747.1</a> |
| GI_42661405-S | 108.8 | 98.6  | 79.9  | LOC284274  | <a href="#">XM 378756.1</a> |
| GI_42661409-S | 89.6  | 94.2  | 87.6  | LOC400659  | <a href="#">XM 378757.1</a> |
| GI_42661413-S | 113.4 | 132.6 | 95.8  | LOC400661  | <a href="#">XM 375545.1</a> |
| GI_42661417-S | 488   | 585.2 | 547.7 | LOC400653  | <a href="#">XM 378750.1</a> |
| GI_42661421-S | 130   | 139.2 | 111.1 | LOC400655  | <a href="#">XM 378753.1</a> |
| GI_42661423-S | 197.9 | 224.3 | 203.1 | LOC400656  | <a href="#">XM 378754.1</a> |
| GI_42661554-S | 145.4 | 133.9 | 173.7 | MGC9913    | <a href="#">XM 378178.1</a> |
| GI_42661564-S | 108.6 | 128.2 | 100.2 | LOC339316  | <a href="#">XM 378791.1</a> |
| GI_42661568-S | 123.1 | 145.8 | 128.5 | LOC400684  | <a href="#">XM 378793.1</a> |
| GI_42661576-S | 101.3 | 102.2 | 98.4  | FLJ21369   | <a href="#">XM 375599.1</a> |
| GI_42661581-S | 174.6 | 184.6 | 192.5 | LOC284402  | <a href="#">XM 378794.1</a> |
| GI_42661584-S | 151.1 | 170.1 | 149.3 | LOC400685  | <a href="#">XM 378795.1</a> |
| GI_42661586-S | 154   | 163.7 | 140.4 | LOC400686  | <a href="#">XM 378796.1</a> |
| GI_42661599-S | 127.7 | 117.9 | 101.3 | LOC400690  | <a href="#">XM 378798.1</a> |
| GI_42661601-S | 100.4 | 114.6 | 111.6 | LOC388536  | <a href="#">XM 371163.2</a> |
| GI_42661614-S | 188   | 193.7 | 159.6 | LOC400693  | <a href="#">XM 375609.1</a> |
| GI_42661616-S | 100.1 | 102.8 | 113.6 | LOC400694  | <a href="#">XM 378800.1</a> |
| GI_42661618-S | 158.8 | 177.7 | 158.5 | LOC400695  | <a href="#">XM 378801.1</a> |
| GI_42661624-S | 97.6  | 90.9  | 86.3  | SYCN       | <a href="#">XM 371167.2</a> |
| GI_42661629-S | 190.9 | 225.9 | 190.5 | LOC400696  | <a href="#">XM 375614.1</a> |
| GI_42661634-S | 97.8  | 105.5 | 93.3  | LOC400700  | <a href="#">XM 378804.1</a> |
| GI_42661636-S | 97.6  | 97.7  | 89.5  | LOC400701  | <a href="#">XM 378805.1</a> |
| GI_42661638-S | 282.5 | 344.4 | 319.3 | LOC400702  | <a href="#">XM 378806.1</a> |
| GI_42661645-S | 274.3 | 355.9 | 300.8 | LOC400704  | <a href="#">XM 378807.1</a> |
| GI_42661655-S | 87.9  | 101.2 | 92.3  | NANOS2     | <a href="#">XM 371181.2</a> |
| GI_42661658-S | 120.5 | 127.9 | 118.8 | DKFZp434J0 | <a href="#">XM 375629.1</a> |
| GI_42661660-S | 204.1 | 263.7 | 209.2 | KIAA1183   | <a href="#">XM 371184.2</a> |
| GI_42661663-S | 102.2 | 105.3 | 86.9  | LOC400707  | <a href="#">XM 375631.1</a> |
| GI_42661667-S | 171.1 | 186.6 | 180.4 | SLC8A2     | <a href="#">XM 375633.1</a> |
| GI_42661669-S | 507.3 | 558.7 | 442.2 | LOC199800  | <a href="#">XM 373810.2</a> |
| GI_42661677-S | 103.8 | 128.2 | 103.9 | MGC45922   | <a href="#">XM 371187.2</a> |
| GI_42661690-S | 143.6 | 153.1 | 144.2 | LOC400713  | <a href="#">XM 375638.1</a> |
| GI_42661704-S | 93.8  | 79.1  | 89.6  | ZNF525     | <a href="#">XM 375646.1</a> |
| GI_42661716-S | 104.7 | 109   | 105.2 | LOC400717  | <a href="#">XM 375655.1</a> |
| GI_42661719-S | 155.7 | 166.9 | 142   | LOC400718  | <a href="#">XM 375656.1</a> |
| GI_42661725-S | 117.9 | 107.2 | 102.5 | LOC388566  | <a href="#">XM 371198.2</a> |
| GI_42661739-S | 97.3  | 92.3  | 90.2  | LOC401911  | <a href="#">XM 377527.1</a> |
| GI_42661743-S | 110.2 | 98.8  | 97.7  | LOC401915  | <a href="#">XM 377529.1</a> |
| GI_42661752-S | 177.5 | 210.7 | 180.3 | LOC401919  | <a href="#">XM 377533.1</a> |

|               |        |       |       |             |                             |
|---------------|--------|-------|-------|-------------|-----------------------------|
| GI_42661754-S | 91.3   | 94.9  | 94.4  | LOC401922   | <a href="#">XM 377537.1</a> |
| GI_42661761-S | 90.4   | 92.4  | 80.6  | LOC401932   | <a href="#">XM 377553.1</a> |
| GI_42661763-S | 81.3   | 105.3 | 90.3  | LOC401933   | <a href="#">XM 377554.1</a> |
| GI_42661835-S | 113.5  | 108.2 | 102   | LOC400663   | <a href="#">XM 375548.1</a> |
| GI_42661847-S | 132.8  | 132.7 | 121.2 | LOC400667   | <a href="#">XM 378765.1</a> |
| GI_42661849-S | 128.7  | 151.4 | 146.5 | LOC400668   | <a href="#">XM 375552.1</a> |
| GI_42661854-S | 124.7  | 129.7 | 125.5 | LOC400669   | <a href="#">XM 378766.1</a> |
| GI_42661865-S | 178.7  | 202.3 | 198   | NY-REN-24   | <a href="#">XM 375557.1</a> |
| GI_42661879-S | 105.8  | 117   | 108.6 | LOC401895   | <a href="#">XM 377500.1</a> |
| GI_42661883-S | 95.3   | 126.9 | 102.5 | EMR4        | <a href="#">XM 377506.1</a> |
| GI_42661954-S | 215.4  | 250.6 | 242.9 | FLJ38149    | <a href="#">XM 375563.1</a> |
| GI_42661956-S | 233    | 310.5 | 289.8 | LOC284385   | <a href="#">XM 378777.1</a> |
| GI_42661972-S | 362.7  | 302.3 | 349.1 | DKFZp434116 | <a href="#">XM 375569.1</a> |
| GI_42661974-S | 107.5  | 128.2 | 107.4 | FLJ14959    | <a href="#">XM 371139.2</a> |
| GI_42661975-S | 127.3  | 117.7 | 123.9 | LOC388507   | <a href="#">XM 371140.2</a> |
| GI_42661991-S | 101.9  | 101.8 | 95.6  | LOC126536   | <a href="#">XM 378780.1</a> |
| GI_42662010-S | 130.9  | 139   | 136.1 | LOC400680   | <a href="#">XM 378783.1</a> |
| GI_42662014-S | 173.6  | 176.4 | 190   | LOC400681   | <a href="#">XM 375589.1</a> |
| GI_42662016-S | 198.9  | 242.3 | 240.4 | LOC400682   | <a href="#">XM 375590.1</a> |
| GI_42662032-S | 152.3  | 127.8 | 125.4 | LOC401896   | <a href="#">XM 377511.1</a> |
| GI_42662043-S | 495.3  | 478.7 | 379.5 | LOC401900   | <a href="#">XM 377516.1</a> |
| GI_42662080-S | 201.8  | 230.8 | 197.1 | LOC388806   | <a href="#">XM 373921.2</a> |
| GI_42662083-S | 208.5  | 229.6 | 210   | LOC400852   | <a href="#">XM 378993.1</a> |
| GI_42662088-S | 96     | 92.6  | 80.8  | LOC400854   | <a href="#">XM 375925.1</a> |
| GI_42662092-S | 136.1  | 161.3 | 170.6 | LOC400855   | <a href="#">XM 375928.1</a> |
| GI_42662213-S | 167.8  | 192.8 | 190.1 | LOC400844   | <a href="#">XM 378977.1</a> |
| GI_42662217-S | 214.2  | 235.9 | 221.7 | LOC400845   | <a href="#">XM 378978.1</a> |
| GI_42662221-S | 137.5  | 137   | 136.8 | LOC149692   | <a href="#">XM 375917.1</a> |
| GI_42662227-S | 115    | 153.5 | 125.4 | LOC400847   | <a href="#">XM 378982.1</a> |
| GI_42662229-S | 121.7  | 126.3 | 131.7 | LOC284749   | <a href="#">XM 378983.1</a> |
| GI_42662244-S | 110.6  | 111.9 | 112.3 | LOC400849   | <a href="#">XM 378988.1</a> |
| GI_42662248-S | 101.9  | 115.9 | 102   | LOC400830   | <a href="#">XM 375902.1</a> |
| GI_42662256-S | 99.7   | 88.8  | 80.2  | LOC400832   | <a href="#">XM 378957.1</a> |
| GI_42662258-S | 146.1  | 175.7 | 159.6 | LOC388779   | <a href="#">XM 373903.2</a> |
| GI_42662266-S | 4359.2 | 5302  | 4114  | LOC388783   | <a href="#">XM 371390.2</a> |
| GI_42662267-S | 99.6   | 108.1 | 100.5 | LOC400835   | <a href="#">XM 378961.1</a> |
| GI_42662273-S | 103.4  | 114.4 | 102.1 | LOC284788   | <a href="#">XM 378969.1</a> |
| GI_42662276-S | 114.6  | 110.1 | 114.6 | LOC400839   | <a href="#">XM 378970.1</a> |
| GI_42662278-S | 104.2  | 103.8 | 118.3 | LOC284798   | <a href="#">XM 378971.1</a> |
| GI_42662288-S | 108.5  | 103.2 | 101.7 | LOC400841   | <a href="#">XM 378974.1</a> |
| GI_42662293-S | 142.5  | 151.2 | 139.4 | MYH7B       | <a href="#">XM 371398.2</a> |
| GI_42662295-S | 314.5  | 348   | 491.1 | LOC400843   | <a href="#">XM 378976.1</a> |
| GI_42662309-S | 115.8  | 107   | 105.8 | LOC388813   | <a href="#">XM 373925.2</a> |
| GI_42662311-S | 155.2  | 176.5 | 154.6 | LOC400860   | <a href="#">XM 375934.1</a> |



|               |        |        |        |           |                             |
|---------------|--------|--------|--------|-----------|-----------------------------|
| GI_42662313-S | 90.1   | 89.5   | 93     | LOC284825 | <a href="#">XM 375935.1</a> |
| GI_42662318-S | 95.1   | 105.9  | 99     | LOC400861 | <a href="#">XM 379002.1</a> |
| GI_42662323-S | 99     | 113.7  | 104.3  | LOC400863 | <a href="#">XM 379004.1</a> |
| GI_42662326-S | 101.9  | 111.8  | 87.1   | LOC400865 | <a href="#">XM 379006.1</a> |
| GI_42662329-S | 94.8   | 94.3   | 94.3   | LOC388824 | <a href="#">XM 373932.2</a> |
| GI_42662331-S | 99.5   | 102.1  | 90.6   | LOC400866 | <a href="#">XM 379009.1</a> |
| GI_42662333-S | 103.6  | 114.2  | 99.9   | LOC400867 | <a href="#">XM 375941.1</a> |
| GI_42662335-S | 100.8  | 107.3  | 97.5   | LOC284835 | <a href="#">XM 379011.1</a> |
| GI_42662337-S | 100.7  | 124.9  | 94.5   | LOC402027 | <a href="#">XM 377687.1</a> |
| GI_42662339-S | 122.3  | 138.7  | 111.6  | LOC400869 | <a href="#">XM 379014.1</a> |
| GI_42662343-S | 93.6   | 98     | 88.3   | LOC400871 | <a href="#">XM 379016.1</a> |
| GI_42662345-S | 184.1  | 212.9  | 197.2  | LOC400872 | <a href="#">XM 379017.1</a> |
| GI_42662347-S | 136.4  | 154.4  | 150.2  | LOC400873 | <a href="#">XM 379018.1</a> |
| GI_42662349-S | 161.2  | 182.1  | 166.1  | LOC400874 | <a href="#">XM 379020.1</a> |
| GI_42662353-S | 103.4  | 95.4   | 82.8   | LOC400875 | <a href="#">XM 379022.1</a> |
| GI_42662355-S | 112.7  | 123.7  | 113.1  | LOC400876 | <a href="#">XM 379023.1</a> |
| GI_42662363-S | 125.4  | 141.1  | 132.9  | LOC388832 | <a href="#">XM 373939.2</a> |
| GI_42662368-S | 403.7  | 475.7  | 440.1  | LOC402030 | <a href="#">XM 377690.1</a> |
| GI_42662370-S | 134.2  | 147.6  | 137.5  | LOC402032 | <a href="#">XM 377691.1</a> |
| GI_42662372-S | 413.1  | 440    | 348.6  | PRDM15    | <a href="#">XM 371414.2</a> |
| GI_42662379-S | 91.8   | 111.4  | 101    | LOC400880 | <a href="#">XM 379030.1</a> |
| GI_42662398-S | 120.4  | 134.3  | 126.8  | LOC388849 | <a href="#">XM 373945.2</a> |
| GI_42662399-S | 119.1  | 118.2  | 132.4  | LOC400889 | <a href="#">XM 375958.1</a> |
| GI_42662415-S | 180    | 219.9  | 190.6  | LOC400890 | <a href="#">XM 379036.1</a> |
| GI_42662421-S | 118.4  | 119.5  | 117.1  | LOC400893 | <a href="#">XM 375965.1</a> |
| GI_42662431-S | 113.9  | 120.8  | 110.9  | LOC400917 | <a href="#">XM 375996.1</a> |
| GI_42662435-S | 2802.9 | 2859.1 | 3289.8 | MGC1842   | <a href="#">XM 371459.2</a> |
| GI_42662437-S | 121.2  | 138.1  | 100.1  | LOC388886 | <a href="#">XM 371460.2</a> |
| GI_42662440-S | 93.1   | 96.3   | 99.4   | LOC400919 | <a href="#">XM 379040.1</a> |
| GI_42662444-S | 118.4  | 130.2  | 113.3  | LOC400920 | <a href="#">XM 379041.1</a> |
| GI_42662448-S | 95.6   | 94.3   | 97.8   | LOC400921 | <a href="#">XM 376001.1</a> |
| GI_42662456-S | 203.5  | 242.3  | 220    | LOC400924 | <a href="#">XM 376003.1</a> |
| GI_42662463-S | 100.9  | 102.1  | 99.2   | LOC91464  | <a href="#">XM 376008.1</a> |
| GI_42662472-S | 106    | 118.4  | 93     | LOC400927 | <a href="#">XM 376010.1</a> |
| GI_42662478-S | 155.2  | 165    | 146.3  | LOC388906 | <a href="#">XM 371469.2</a> |
| GI_42662480-S | 123    | 119.9  | 117.8  | LOC400929 | <a href="#">XM 379055.1</a> |
| GI_42662492-S | 148.9  | 168    | 149    | LOC402056 | <a href="#">XM 377715.1</a> |
| GI_42662494-S | 82.4   | 91.8   | 98.6   | LOC402057 | <a href="#">XM 377716.1</a> |
| GI_42662498-S | 129.4  | 133.9  | 124.5  | LOC150356 | <a href="#">XM 377720.1</a> |
| GI_42662500-S | 170.8  | 551.5  | 155.3  | KIAA1644  | <a href="#">XM 376018.1</a> |
| GI_42662503-S | 370.9  | 435.3  | 378.5  | LOC400930 | <a href="#">XM 376019.1</a> |
| GI_42662505-S | 119.8  | 156.1  | 128.1  | LOC400931 | <a href="#">XM 376020.1</a> |
| GI_42662514-S | 114.4  | 123.3  | 113.3  | LOC284933 | <a href="#">XM 379064.1</a> |
| GI_42662516-S | 116.6  | 126.4  | 108.7  | LOC402064 | <a href="#">XM 377721.1</a> |

|               |       |        |        |           |                             |
|---------------|-------|--------|--------|-----------|-----------------------------|
| GI_42662518-S | 95.4  | 95.1   | 86.8   | LOC400933 | <a href="#">XM 379065.1</a> |
| GI_42662520-S | 226.3 | 264.7  | 231.7  | LOC400934 | <a href="#">XM 376022.1</a> |
| GI_42662524-S | 159   | 200    | 230.9  | LOC388918 | <a href="#">XM 373971.2</a> |
| GI_42662533-S | 120.5 | 157.7  | 150.3  | LOC401615 | <a href="#">XM 379721.1</a> |
| GI_42662536-S | 269   | 272.3  | 210.6  | LOC389848 | <a href="#">XM 372204.2</a> |
| GI_42662537-S | 97.7  | 99.8   | 91.7   | LOC401585 | <a href="#">XM 379702.1</a> |
| GI_42662541-S | 92.2  | 97.7   | 92.9   | LOC401587 | <a href="#">XM 379703.1</a> |
| GI_42662543-S | 147.4 | 144.5  | 154    | LOC401588 | <a href="#">XM 379704.1</a> |
| GI_42662567-S | 81.6  | 81.4   | 81.4   | LOC401590 | <a href="#">XM 377002.1</a> |
| GI_42662569-S | 90.5  | 122.8  | 94.3   | LOC402402 | <a href="#">XM 378113.1</a> |
| GI_42662571-S | 110.6 | 151.3  | 151    | LOC402403 | <a href="#">XM 378116.1</a> |
| GI_42662576-S | 76.1  | 90.8   | 81.4   | LOC401602 | <a href="#">XM 377024.1</a> |
| GI_42662580-S | 163.4 | 178.5  | 159.8  | LOC401604 | <a href="#">XM 377026.1</a> |
| GI_42662586-S | 93.9  | 106.2  | 100.5  | LOC401607 | <a href="#">XM 379717.1</a> |
| GI_42662591-S | 199.6 | 246.7  | 222.6  | LOC401610 | <a href="#">XM 377031.1</a> |
| GI_42662606-S | 119.1 | 126.4  | 125.3  | LOC402415 | <a href="#">XM 378125.1</a> |
| GI_42662616-S | 170.4 | 195.9  | 195.2  | LOC389865 | <a href="#">XM 374329.2</a> |
| GI_42662617-S | 114.1 | 135.6  | 119.4  | LOC389866 | <a href="#">XM 372227.2</a> |
| GI_42662621-S | 291.1 | 315.7  | 313.6  | LOC401595 | <a href="#">XM 377019.1</a> |
| GI_42662625-S | 100.9 | 111    | 108.7  | LOC392490 | <a href="#">XM 373356.2</a> |
| GI_42662627-S | 103.1 | 112.1  | 121    | FLJ20105  | <a href="#">XM 372231.2</a> |
| GI_42662629-S | 241.4 | 279.5  | 254    | LOC389873 | <a href="#">XM 372233.2</a> |
| GI_42662630-S | 136.9 | 134.7  | 125.1  | LOC401597 | <a href="#">XM 379715.1</a> |
| GI_42662641-S | 3532  | 3253.2 | 2464.6 | LOC203547 | <a href="#">XM 377060.1</a> |
| GI_42662643-S | 85.1  | 83.1   | 78.7   | LOC401620 | <a href="#">XM 377062.1</a> |
| GI_42662647-S | 168   | 166.9  | 174.5  | LOC402429 | <a href="#">XM 378143.1</a> |
| GI_42662651-S | 171.9 | 187    | 185.3  | LOC401579 | <a href="#">XM 379696.1</a> |
| GI_42662654-S | 141.5 | 148.3  | 133.7  | LOC389839 | <a href="#">XM 372197.2</a> |
| GI_42662662-S | 116.5 | 136.6  | 123.4  | LOC401582 | <a href="#">XM 379697.1</a> |
| GI_42662676-S | 95.4  | 102.5  | 100.8  | LOC401583 | <a href="#">XM 379699.1</a> |
| GI_42662678-S | 138.6 | 153.8  | 147.4  | LOC401618 | <a href="#">XM 377041.1</a> |
| GI_42662683-S | 109.2 | 101.4  | 96.8   | LOC389889 | <a href="#">XM 374336.2</a> |
| GI_42662684-S | 128.7 | 142.5  | 122    | RAC4      | <a href="#">XM 210062.4</a> |
| GI_42662685-S | 104.9 | 98.5   | 97.7   | LOC286411 | <a href="#">XM 379728.1</a> |
| GI_42662702-S | 118.5 | 139.9  | 131.3  | LOC401621 | <a href="#">XM 379730.1</a> |
| GI_42662714-S | 106   | 119.4  | 115.1  | LOC401616 | <a href="#">XM 379722.1</a> |
| GI_42662716-S | 106.1 | 115.5  | 122.3  | LOC401617 | <a href="#">XM 379723.1</a> |
| GI_42662721-S | 196.6 | 208.2  | 199    | LOC401625 | <a href="#">XM 377076.1</a> |
| GI_42662730-S | 102.6 | 108.4  | 97.7   | LOC401584 | <a href="#">XM 376986.1</a> |
| GI_42662732-S | 104.4 | 108.1  | 112.7  | LOC402414 | <a href="#">XM 378124.1</a> |
| GI_42662742-S | 87.6  | 97.3   | 84.5   | LOC402437 | <a href="#">XM 378158.1</a> |
| GI_42662756-S | 102.4 | 104.7  | 93     | LOC402433 | <a href="#">XM 379761.1</a> |
| GI_42662760-S | 106.6 | 118.2  | 111.2  | LOC401627 | <a href="#">XM 377087.1</a> |
| GI_42662766-S | 115.6 | 107.7  | 109    | LOC389828 | <a href="#">XM 372181.2</a> |

|               |         |        |        |            |                             |                                      |             |              |             |
|---------------|---------|--------|--------|------------|-----------------------------|--------------------------------------|-------------|--------------|-------------|
| GI_42662773-S | 110.6   | 131.3  | 122.2  | LOC401571  | <a href="#">XM_379686.1</a> |                                      |             |              |             |
| GI_42662775-S | 110.7   | 120.8  | 113.4  | LOC401572  | <a href="#">XM_376968.1</a> |                                      |             |              |             |
| GI_42662779-S | 202.1   | 249.5  | 216.3  | LOC401573  | <a href="#">XM_379688.1</a> |                                      |             |              |             |
| GI_42662787-S | 99.2    | 111.5  | 97.4   | LOC401574  | <a href="#">XM_379692.1</a> |                                      |             |              |             |
| GI_42714610-S | 195.8   | 221.8  | 216.4  | UNQ2541    | <a href="#">NM_203347.1</a> |                                      |             |              |             |
| GI_42714663-I | 88.4    | 93.8   | 86     | PSG11      | <a href="#">NM_203287.1</a> | PSG13;PSG14;MGC22484                 | plasma      | extracellul  | pregnancy   |
| GI_42716274-S | 1263.8  | 1252.6 | 1126.3 | KIAA1007   | <a href="#">NM_016284.3</a> | AD-005                               |             |              |             |
| GI_42716276-S | 265.1   | 268.4  | 221.9  | KIAA0285   | <a href="#">NM_014807.3</a> | DLNB23                               |             |              |             |
| GI_42716278-A | 10337.1 | 11497  | 8969.2 | HDLBP      | <a href="#">NM_005336.2</a> | HBP;VGL                              | lipid       | nucleus      | cholester   |
| GI_42716279-I | 171     | 198.2  | 155.8  | HDLBP      | <a href="#">NM_203346.1</a> | HBP;VGL                              | lipid       | nucleus      | cholester   |
| GI_42716281-S | 970.1   | 811.7  | 715.2  | GTL3       | <a href="#">NM_013242.2</a> |                                      |             |              | developm    |
| GI_42716282-S | 1130.7  | 1865.2 | 1707.6 | FLJ13154   | <a href="#">NM_024598.2</a> |                                      |             |              |             |
| GI_42716284-S | 162.8   | 144.5  | 150.9  | FOXL2      | <a href="#">NM_023067.2</a> | BPES;PFRK;BPES1;PINTO                | transcripti | nucleus      | regulation  |
| GI_42716285-S | 254.7   | 225.1  | 156.2  | FANCF      | <a href="#">NM_022725.2</a> | FAF                                  | molecular   | nucleus      | DNA         |
| GI_42716286-S | 471.9   | 503.7  | 423.2  | FLJ10904   | <a href="#">NM_018268.2</a> | MSTP048                              |             |              |             |
| GI_42716292-S | 410.1   | 558.3  | 536.8  | EMP2       | <a href="#">NM_001424.3</a> | XMP;MGC9056                          |             | integral to  | cell death  |
| GI_42716294-S | 522.9   | 704.1  | 586.9  | DKFZp761B1 | <a href="#">NM_032288.4</a> |                                      |             |              |             |
| GI_42716296-S | 1313.7  | 3276.9 | 2464.2 | CLU        | <a href="#">NM_001831.2</a> | CLI;APOJ;SGP2;SGP-2;SP-              | plasma      |              | compleme    |
| GI_42716300-S | 6103    | 8395.5 | 6753.9 | CD59       | <a href="#">NM_000611.4</a> | MIN1;MIN2;MIN3;MIC11;MSK21;MGC2354;P | lymphocyt   | membran      | blood       |
| GI_42716303-S | 261.1   | 293.6  | 282    | C11orf5    | <a href="#">NM_014205.2</a> | FON;ZNHIT2                           |             |              |             |
| GI_42716304-I | 161.1   | 151.2  | 138.8  | AZ2        | <a href="#">NM_203326.1</a> | NAP1;FLJ21939                        |             |              |             |
| GI_42716306-S | 96.7    | 101.2  | 112.5  | BTBD14A    | <a href="#">NM_144653.3</a> | BTBD14;MGC23427                      | protein     |              |             |
| GI_42716307-I | 316     | 342.6  | 275.6  | AZ2        | <a href="#">NM_022461.2</a> | NAP1;FLJ21939                        |             |              |             |
| GI_42716308-S | 167.5   | 173.2  | 152.5  | ASCL2      | <a href="#">NM_005170.2</a> | ASH2;HASH2;MASH2                     | transcripti | nucleus      | peripheral  |
| GI_42716309-S | 129.5   | 166.5  | 155.3  | ARHB       | <a href="#">NM_004040.2</a> | ARH6;RHOB;RHOH6                      | Rho small   | peripheral   | Rho         |
| GI_42716310-S | 649.1   | 502.2  | 572.3  | ARNTL      | <a href="#">NM_001178.3</a> | TIC;JAP3;MOP3;BMAL1;MGC47515         | signal      | nucleus      | circadian   |
| GI_42716312-S | 475.2   | 566.1  | 447.2  | ANG        | <a href="#">NM_001145.2</a> | RNASE5                               | pancreatic  |              | RNA         |
| GI_42717993-A | 318     | 396.2  | 388.4  | DTNA       | <a href="#">NM_001392.3</a> | DTN;DRP3;D18S892E                    | protein     | kinesin      | striated    |
| GI_42717993-I | 353.3   | 407.7  | 383.4  | DTNA       | <a href="#">NM_001392.3</a> | DTN;DRP3;D18S892E                    | protein     | kinesin      | striated    |
| GI_42718002-I | 149.6   | 189.8  | 230.4  | DTNA       | <a href="#">NM_001391.3</a> | DTN;DRP3;D18S892E                    | protein     | kinesin      | striated    |
| GI_42718008-S | 146     | 187.8  | 163.1  | CCR4       | <a href="#">NM_005508.3</a> | CKR4;k5-5;CMKBR4;ChemR13;CC-CKR-     | chemokin    | integral to  | cytosolic   |
| GI_42718009-S | 107     | 89.5   | 96.4   | CIB3       | <a href="#">NM_054113.2</a> | KIP3                                 | calcium     |              |             |
| GI_42718010-S | 107.6   | 108.1  | 117.6  | CNGA2      | <a href="#">NM_005140.1</a> | CNCA;CNG2;CNCA1;OCNC1;OCNCa;OCNC     | ion         | intracellula | perception  |
| GI_42718012-A | 1484    | 1410.1 | 1459.9 | RBBP8      | <a href="#">NM_002894.2</a> | RIM;CTIP                             |             | kinesin      | cell cycle  |
| GI_42718016-I | 101     | 98.5   | 100.7  | RBBP8      | <a href="#">NM_203292.1</a> | RIM;CTIP                             |             | kinesin      | cell cycle  |
| GI_42718018-S | 510.4   | 424    | 439.6  | RNF44      | <a href="#">NM_014901.4</a> | KIAA1100                             |             |              |             |
| GI_42718019-S | 843.1   | 547.5  | 615.7  | RP9        | <a href="#">NM_203288.1</a> | PAP-1                                | nucleic     | nucleus      | visual      |
| GI_42733591-S | 134.3   | 163.8  | 146.2  | MGC50722   | <a href="#">NM_203348.1</a> |                                      |             |              |             |
| GI_42733607-S | 98.5    | 107.8  | 101.2  | ZNF124     | <a href="#">NM_003431.2</a> | HZF16                                | DNA         | nucleus      | regulation  |
| GI_42733609-S | 124.2   | 169.2  | 161    | ZNF132     | <a href="#">NM_003433.2</a> | pHZ-12                               | transcripti | nucleus      | regulation  |
| GI_42734299-S | 88.7    | 99.2   | 87.5   | ZNF272     | <a href="#">NM_006635.1</a> | HZF8                                 | DNA         | nucleus      | regulation  |
| GI_42734303-S | 142.7   | 167.3  | 151    | MUC6       | <a href="#">NM_005961.1</a> |                                      | molecular   | cellular_co  | response    |
| GI_42734305-S | 770.8   | 628.7  | 381.4  | IQCB1      | <a href="#">NM_014642.2</a> | KIAA0036                             |             |              |             |
| GI_42734307-S | 938.8   | 573    | 641    | SLC35D2    | <a href="#">NM_007001.1</a> | SQV7L;UGTrel8                        | nucleotide- | cellular_co  | biological_ |

|               |        |        |        |             |                             |                        |             |                         |
|---------------|--------|--------|--------|-------------|-----------------------------|------------------------|-------------|-------------------------|
| GI_42734309-S | 272.9  | 279.4  | 262.9  | KIAA0140    | <a href="#">NM_014661.2</a> | bA12J10.2              | S-          | carbohydr               |
| GI_42734313-S | 546.3  | 643.3  | 490.2  | KIAA0669    | <a href="#">NM_014779.2</a> |                        | transcripti | regulation              |
| GI_42734318-S | 348.2  | 304    | 305.1  | DCLRE1A     | <a href="#">NM_014881.2</a> | PSO2;SNM1;KIAA0086     |             |                         |
| GI_42734322-S | 786.5  | 945.7  | 851.6  | KIAA0913    | <a href="#">NM_015037.1</a> |                        |             |                         |
| GI_42734324-S | 240.6  | 272.4  | 242.8  | KIAA0261    | <a href="#">NM_015045.1</a> | FOE                    |             |                         |
| GI_42734326-S | 616    | 346.4  | 418.5  | GARNL4      | <a href="#">NM_015085.1</a> | KIAA1039               |             |                         |
| GI_42734330-S | 1073.9 | 1062.8 | 1065.4 | DNAJC13     | <a href="#">NM_015268.1</a> | RME8;KIAA0678          | ATP         | tRNA                    |
| GI_42734332-S | 156    | 172.4  | 174.4  | VPS13D      | <a href="#">NM_015378.1</a> | FLJ10619;KIAA0453      |             |                         |
| GI_42734334-S | 849.4  | 1174.5 | 977.9  | DKFZP564F0  | <a href="#">NM_015475.1</a> |                        |             |                         |
| GI_42734336-S | 323.2  | 374.1  | 350    | DKFZp434K0  | <a href="#">NM_019085.1</a> | MGC50505               |             |                         |
| GI_42734338-S | 220    | 217.8  | 234.7  | FLJ10719    | <a href="#">NM_018193.1</a> | KIAA1794               |             |                         |
| GI_42734342-S | 174.2  | 193.9  | 164.9  | KIAA1271    | <a href="#">NM_020746.1</a> |                        |             |                         |
| GI_42734346-S | 142.3  | 154.9  | 156    | KIAA1641    | <a href="#">NM_020970.1</a> | FLJ21281               |             |                         |
| GI_42734348-S | 536.8  | 579.4  | 683.6  | SDS3        | <a href="#">NM_022491.1</a> | FLJ00052               |             |                         |
| GI_42734354-S | 308.5  | 286.2  | 273.3  | MGC11349    | <a href="#">NM_025112.2</a> | FLJ13861               |             |                         |
| GI_42734355-S | 556.5  | 635.9  | 612.3  | DKFZp547D1  | <a href="#">NM_032282.1</a> |                        |             |                         |
| GI_42734357-S | 130    | 146.5  | 135.5  | KIAA1822    | <a href="#">NM_032425.1</a> |                        |             |                         |
| GI_42734359-S | 204.9  | 244.2  | 234.5  | FLJ14743    | <a href="#">NM_033088.1</a> | KIAA1761               |             |                         |
| GI_42734361-S | 871.3  | 847.1  | 737.4  | DOCK7       | <a href="#">NM_033407.1</a> | KIAA1771               |             |                         |
| GI_42734363-S | 98.6   | 101    | 89     | KIAA1909    | <a href="#">NM_052909.1</a> | FLJ43173               |             |                         |
| GI_42734367-S | 497    | 493.2  | 434.8  | MGC14798    | <a href="#">NM_080650.2</a> |                        |             |                         |
| GI_42734372-S | 495.1  | 650.7  | 837.1  | KIAA1944    | <a href="#">NM_133448.1</a> |                        |             |                         |
| GI_42734374-S | 194.3  | 200.6  | 157.3  | KIAA1977    | <a href="#">NM_133450.1</a> | FLJ32345;FLJ32767      |             |                         |
| GI_42734376-S | 592.4  | 699.6  | 685.8  | CHD1L       | <a href="#">NM_004284.2</a> | CHDL;FLJ22530          | ATP         |                         |
| GI_42734378-S | 94.4   | 80.3   | 85.2   | MGC33488    | <a href="#">NM_138350.2</a> |                        | DNA         |                         |
| GI_42734380-S | 229    | 219    | 208.2  | LOC127253   | <a href="#">NM_138467.1</a> | FLJ40918               |             |                         |
| GI_42734382-S | 209.1  | 223.9  | 222.5  | LOC148898   | <a href="#">NM_138479.1</a> |                        |             |                         |
| GI_42734384-S | 260.4  | 238.3  | 165.2  | PWWP2       | <a href="#">NM_138499.1</a> | bA432J24.1             |             |                         |
| GI_42734386-S | 883.9  | 859.9  | 661.4  | LOC199692   | <a href="#">NM_145295.2</a> |                        | nucleic     | intracellula regulation |
| GI_42734387-S | 592.6  | 636.8  | 572.8  | C14orf75    | <a href="#">NM_153046.1</a> | FLJ36164;DKFZp434N0820 | nucleic     |                         |
| GI_42734389-S | 110.9  | 106.5  | 108.9  | FLJ40298    | <a href="#">NM_173486.1</a> |                        |             |                         |
| GI_42734392-S | 96.9   | 101.6  | 92.7   | LOC283150   | <a href="#">NM_181721.1</a> |                        | transcripti | nucleus regulation      |
| GI_42734394-S | 129.8  | 133.7  | 131    | DKFZp547K1  | <a href="#">NM_198526.1</a> | FLJ37393               | electron    | electron                |
| GI_42734396-S | 209.4  | 195    | 151.4  | C6orf157    | <a href="#">NM_198920.1</a> | H10BH;DKFZp434A1520    |             |                         |
| GI_42734400-S | 123.7  | 127.2  | 102.6  | C14orf20    | <a href="#">NM_174944.2</a> | c14_5117               | ATP         | protein                 |
| GI_42734423-S | 1132.5 | 1271.4 | 1176.8 | PSMD14      | <a href="#">NM_005805.2</a> | PAD1;POH1;rpn11        |             | 26S ubiquitin-          |
| GI_42734426-S | 191.1  | 215.3  | 182.7  | NAB2        | <a href="#">NM_005967.2</a> | MADER                  | transcripti | neurogene               |
| GI_42734427-S | 167.9  | 157.7  | 135.1  | SPRR2B      | <a href="#">NM_006945.2</a> |                        | structural  | cytoplasm epidermal     |
| GI_42734429-S | 138.6  | 149.7  | 145.4  | PTRF        | <a href="#">NM_012232.2</a> | FKSG13                 |             |                         |
| GI_42734431-S | 382.7  | 385.6  | 292.1  | NLK         | <a href="#">NM_016231.2</a> |                        | protein     | nucleus protein         |
| GI_42734433-S | 154.4  | 223.6  | 229.4  | FLJ22353    | <a href="#">NM_024587.2</a> |                        |             |                         |
| GI_42734435-S | 2875.3 | 2555.4 | 2481   | EFHD2       | <a href="#">NM_024329.4</a> | MGC4342                | calcium     |                         |
| GI_42734437-S | 1049.7 | 1231.6 | 949.6  | BM-009      | <a href="#">NM_016623.3</a> |                        |             |                         |
| GI_42734442-S | 170.7  | 188.7  | 172.2  | DKKL1-pendi | <a href="#">NM_014419.3</a> | SGY;SGY1;SGY-1         | signal      | extracellul embryoge    |

|               |        |        |        |           |                             |                                         |            |             |             |         |
|---------------|--------|--------|--------|-----------|-----------------------------|-----------------------------------------|------------|-------------|-------------|---------|
| GI_42734502-I | 84.7   | 88.1   | 89.4   | M11S1     | <a href="#">NM_203364.1</a> | GPIAP1                                  |            | integral to |             |         |
| GI_42734506-S | 509.2  | 658.2  | 364.5  | RAB26     | <a href="#">NM_014353.3</a> | V46133                                  | GTP        | cellular_co | protein     |         |
| GI_42740889-S | 159.5  | 251.1  | 189.4  | SLC12A8   | <a href="#">NM_024628.4</a> | CCC9;FLJ23188                           | amino      | membran     | amino       |         |
| GI_42740890-S | 3282.9 | 3467.5 | 3620.2 | SF3B5     | <a href="#">NM_031287.2</a> | SF3b10;MGC3133                          |            | spliceoso   | mRNA        |         |
| GI_42740891-I | 103    | 99.3   | 100.8  | RAPH1     | <a href="#">NM_025252.2</a> | RMO1;ALS2CR9;ALS2CR18;KIAA1681;RalG     |            | cytoskelet  | neuropepti  |         |
| GI_42740892-I | 119    | 126    | 114.6  | RAPH1     | <a href="#">NM_203365.1</a> | RMO1;ALS2CR9;ALS2CR18;KIAA1681;RalG     |            | cytoskelet  | neuropepti  |         |
| GI_42740896-A | 101.5  | 97.3   | 88.2   | MGEA6     | <a href="#">NM_005930.2</a> | MEA6;MGEA;CTAGE-5A                      | enzyme     | kinesin     |             |         |
| GI_42740900-I | 131.3  | 108.9  | 96.3   | MGEA6     | <a href="#">NM_203356.1</a> | MEA6;MGEA;CTAGE-5A                      | enzyme     | kinesin     |             |         |
| GI_42740902-S | 231.6  | 233.2  | 220.9  | MGC61716  | <a href="#">NM_182501.2</a> |                                         |            |             |             |         |
| GI_42740904-I | 94     | 88.2   | 93.7   | MGEA6     | <a href="#">NM_203354.1</a> | MEA6;MGEA;CTAGE-5A                      | enzyme     | kinesin     |             |         |
| GI_42741647-S | 6272.1 | 7017.4 | 5823.4 | 15-Sep    | <a href="#">NM_004261.3</a> |                                         |            | selenium    |             |         |
| GI_42741651-I | 122.3  | 123.8  | 125.1  | SERTAD3   | <a href="#">NM_203344.1</a> | RBT1                                    |            |             |             |         |
| GI_42741653-S | 2293   | 2603.5 | 2557.9 | TARDBP    | <a href="#">NM_007375.3</a> | TDP-43                                  |            | microtubul  | nucleus     | mitosis |
| GI_42741654-S | 233.8  | 216.9  | 186.6  | MET       | <a href="#">NM_000245.2</a> | HGFR;RCCP2                              | hepatocyt  | integral to | oncogene    |         |
| GI_42741656-A | 273.9  | 370.9  | 378.9  | TIAF1     | <a href="#">NM_004740.3</a> | MAJN                                    |            | perinuclea  | anti-       |         |
| GI_42741657-S | 102.8  | 121.6  | 111.1  | TNP2      | <a href="#">NM_005425.4</a> |                                         | DNA        | chromoso    | DNA         |         |
| GI_42741658-S | 113.4  | 118.9  | 122.3  | ABCB1     | <a href="#">NM_000927.3</a> | CLCS;MDR1;P-                            | ATP        | integral to | drug        |         |
| GI_42741662-S | 427.3  | 477.8  | 467.4  | CCBL1     | <a href="#">NM_004059.3</a> | MGC29624                                | transamin  | cytosol     | amino       |         |
| GI_42741664-S | 393.9  | 501.6  | 447.9  | CDK5R2    | <a href="#">NM_003936.3</a> | P39;NCK5AI;p39nck5ai                    | cell cycle | cyclin-     | regulation  |         |
| GI_42741665-S | 258.1  | 293.5  | 261.2  | CDK6      | <a href="#">NM_001259.4</a> | PLSTIRE;MGC59692                        | cell cycle |             | G1 phase    |         |
| GI_42741666-S | 272.2  | 317.6  | 298.1  | GALNT13   | <a href="#">NM_052917.1</a> | KIAA1918;GalNAc-T13                     |            |             |             |         |
| GI_42741668-S | 123.2  | 106.1  | 94.9   | KBTBD10   | <a href="#">NM_006063.2</a> | SARCOSIN                                | protein    | cytoskelet  | striated    |         |
| GI_42741670-S | 202.1  | 215.3  | 255.4  | NAT1      | <a href="#">NM_000662.4</a> | AAC1                                    | arylamine  |             |             |         |
| GI_42741672-S | 914.5  | 1044.1 | 898.9  | SAS       | <a href="#">NM_005981.3</a> |                                         |            | membran     | positive    |         |
| GI_42741673-S | 7102.2 | 6805.4 | 5866.7 | PDLIM7    | <a href="#">NM_005451.3</a> | ENIGMA                                  |            |             | receptor    |         |
| GI_42741678-S | 186.1  | 224.6  | 228    | ATP6V0A2  | <a href="#">NM_012463.2</a> | a2;TJ6;J6B7;Stv1;TJ6M;TJ6s;Vph1;ATP6a2; |            |             | immune      |         |
| GI_42741680-S | 284.8  | 230.5  | 198.1  | ATP6V1E2  | <a href="#">NM_080653.3</a> | VMA4;ATP6E1;ATP6EL2;MGC9341;ATP6V1      | hydrogen-  | proton-     | ATP         |         |
| GI_42741681-S | 2078.1 | 1881.9 | 1208.4 | ZNF265    | <a href="#">NM_005455.3</a> | ZIS;ZIS1;ZIS2                           | RNA        | nucleus     | RNA         |         |
| GI_42761478-S | 127.5  | 128.4  | 126.3  | FLJ35709  | <a href="#">NM_173589.2</a> |                                         |            |             |             |         |
| GI_42764629-S | 272.1  | 343.4  | 299    | THRSP     | <a href="#">NM_003251.2</a> | S14;SPOT14;MGC21659                     |            | nucleus     | lipid       |         |
| GI_42764682-I | 92.1   | 95.5   | 87.1   | DUSP6     | <a href="#">NM_001946.2</a> | MKP3;PYST1                              | phosphopr  | soluble     | inactivatio |         |
| GI_42764686-A | 100.4  | 108.8  | 104.8  | DUSP6     | <a href="#">NM_022652.2</a> | MKP3;PYST1                              | phosphopr  | soluble     | inactivatio |         |
| GI_42766421-S | 95.5   | 94.6   | 91.7   | LOC387758 | <a href="#">NM_203371.1</a> | MGC24932                                |            |             |             |         |
| GI_42766423-S | 280.3  | 298.3  | 286    | LOC389119 | <a href="#">NM_203370.1</a> | MGC20416                                |            |             |             |         |
| GI_42766427-S | 301    | 266.5  | 253.7  | FLJ20232  | <a href="#">NM_019008.4</a> | HSU79252;dJ1104E15.3                    | molecular  | cellular_co | biological_ |         |
| GI_42789379-S | 1292.6 | 1755   | 1669.9 | SELT      | <a href="#">NM_016275.3</a> |                                         | selenium   | cellular_co | selenocyst  |         |
| GI_42789728-S | 104.9  | 114.2  | 107.5  | LRMP      | <a href="#">NM_006152.2</a> | JAW1                                    |            | endoplas    | vesicle     |         |
| GI_42794008-S | 2200.7 | 2311.7 | 2293.3 | DPAGT1    | <a href="#">NM_001382.2</a> | GPT;ALG7;DGPT;G1PT;UAGT;UGAT;DPAG       | UDP-N-     | endoplas    | lipid       |         |
| GI_42794262-S | 196.8  | 173.9  | 194.9  | LOC389677 | <a href="#">NM_203390.1</a> | MGC:33837                               |            |             |             |         |
| GI_42794264-S | 411.8  | 459.3  | 387.6  | MRGD      | <a href="#">NM_198923.2</a> |                                         | receptor   | integral to | G-protein   |         |
| GI_42794268-S | 141.5  | 161.5  | 149.7  | LOC284123 | <a href="#">NM_203392.1</a> | MGC35151                                |            |             |             |         |
| GI_42794270-S | 144.1  | 169.5  | 149.6  | DEHAL1    | <a href="#">NM_203395.1</a> |                                         |            |             |             |         |
| GI_42794272-S | 1155   | 1436.9 | 1152.8 | LOC283807 | <a href="#">NM_203373.1</a> | MGC75496                                |            |             |             |         |
| GI_42794274-S | 113.1  | 130.7  | 133.8  | MGC71805  | <a href="#">NM_203381.1</a> |                                         |            |             |             |         |

|               |        |        |        |            |                             |                                      |                    |                       |
|---------------|--------|--------|--------|------------|-----------------------------|--------------------------------------|--------------------|-----------------------|
| GI_42794609-S | 1154.2 | 1048.7 | 1097.7 | RNH        | <a href="#">NM_002939.3</a> | RAI;MGC4569;MGC18200;MGC54054        | ribonuclea         | RNA                   |
| GI_42794610-S | 1321.9 | 1231.9 | 858.3  | PGLS       | <a href="#">NM_012088.2</a> | 6PGL                                 | 6-                 | pentose-              |
| GI_42794611-S | 100.1  | 87     | 97.4   | MYEOV      | <a href="#">NM_138768.2</a> | OCIM                                 | nucleic            |                       |
| GI_42794613-S | 129.7  | 133    | 129.7  | LOC389458  | <a href="#">NM_203393.1</a> | MGC:35170                            |                    |                       |
| GI_42794615-S | 142.1  | 157.1  | 161.7  | LOC284912  | <a href="#">NM_203375.1</a> | MGC3170                              |                    |                       |
| GI_42794617-S | 141.4  | 157.6  | 140.6  | LOC388730  | <a href="#">NM_203376.1</a> | MGC75217                             |                    |                       |
| GI_42794619-S | 180.3  | 259.5  | 340    | HYPE       | <a href="#">NM_007076.2</a> | MGC5623;UNQ3041                      | protein            | pathogene             |
| GI_42794621-S | 263.7  | 229.4  | 268.2  | LOC147808  | <a href="#">NM_203374.1</a> | MGC75238                             |                    |                       |
| GI_42794623-S | 259.9  | 305.1  | 302.3  | C20orf141  | <a href="#">NM_080739.2</a> | MGC26144;dJ860F19.4                  |                    |                       |
| GI_42794624-S | 290.6  | 281.8  | 281.1  | AMACR      | <a href="#">NM_014324.4</a> | RACE                                 | alpha-             | peroxisom metabolis   |
| GI_42794751-S | 82.9   | 85.3   | 94.5   | ACSL3      | <a href="#">NM_004457.3</a> | ACS3;FACL3;PRO2194                   | fatty-acyl-        | fatty acid            |
| GI_42794755-S | 288    | 339    | 258.3  | ACSL5      | <a href="#">NM_016234.3</a> | ACS2;ACS5;FACL5                      | long-chain-        | fatty acid            |
| GI_42794757-I | 105.4  | 108.5  | 106.2  | ACSL5      | <a href="#">NM_203379.1</a> | ACS2;ACS5;FACL5                      | long-chain-        | fatty acid            |
| GI_42794759-I | 93.5   | 106.6  | 105    | ACSL5      | <a href="#">NM_203380.1</a> | ACS2;ACS5;FACL5                      | long-chain-        | fatty acid            |
| GI_42794761-S | 208.9  | 179.1  | 204    | GK         | <a href="#">NM_000167.3</a> | GKD                                  | ATP                | mitochond carbohydr   |
| GI_42794764-A | 315.8  | 397.9  | 455.6  | MAP3K3     | <a href="#">NM_002401.3</a> | MEKK3;MAPKKK3                        | MAP                | MAPKKK                |
| GI_42794766-I | 105.2  | 111.1  | 113.2  | MAP3K3     | <a href="#">NM_203351.1</a> | MEKK3;MAPKKK3                        | MAP                | MAPKKK                |
| GI_42794768-S | 953.9  | 762.7  | 887.5  | PAK1       | <a href="#">NM_002576.3</a> | PAKalpha                             | protein            | JNK                   |
| GI_42794770-A | 3308.8 | 5270.2 | 3962.5 | TXNDC5     | <a href="#">NM_030810.2</a> | UNQ364;EndoPDI;MGC3178;FLJ21353;FLJ9 | electron           | endoplas electron     |
| GI_42794774-I | 172.7  | 181    | 134.3  | TXNDC5     | <a href="#">NM_022085.3</a> | UNQ364;EndoPDI;MGC3178;FLJ21353;FLJ9 | electron           | endoplas electron     |
| GI_42794776-S | 1495.7 | 1391.9 | 1792.9 | ARL2BP     | <a href="#">NM_012106.3</a> | BART1                                | small              | signal                |
| GI_42794777-I | 107.3  | 115.8  | 113.7  | MYO18A     | <a href="#">NM_078471.3</a> | MYSPDZ                               |                    |                       |
| GI_42821106-S | 105.2  | 117.3  | 108.6  | BGALT15    | <a href="#">NM_198540.2</a> |                                      | transferas membran | protein               |
| GI_42821107-S | 112.9  | 114.6  | 108.3  | LOC388394  | <a href="#">NM_203400.1</a> | MGC43894                             |                    |                       |
| GI_42821109-S | 184.5  | 187.9  | 177.5  | LOC340602  | <a href="#">NM_203407.1</a> | MGC47837                             |                    |                       |
| GI_42821113-S | 95.5   | 106.3  | 89.6   | LOC158724  | <a href="#">NM_203408.1</a> | MGC27003                             |                    |                       |
| GI_42822875-S | 257.8  | 186.4  | 203.2  | LOC286343  | <a href="#">NM_203403.1</a> | MGC46502                             |                    |                       |
| GI_42822877-S | 88.5   | 96.6   | 94.3   | LOC388818  | <a href="#">NM_203405.1</a> | MGC71787                             |                    |                       |
| GI_42822879-S | 607.8  | 485.3  | 505.8  | LOC153364  | <a href="#">NM_203406.1</a> | MGC46734                             |                    |                       |
| GI_42822881-S | 723.5  | 873    | 728.8  | LOC161247  | <a href="#">NM_203402.1</a> | MGC46490                             |                    |                       |
| GI_42822885-S | 134.8  | 133.8  | 113    | HSPA6      | <a href="#">NM_002155.3</a> |                                      | heat               | heat                  |
| GI_42822886-S | 114.1  | 119.5  | 107.2  | FY         | <a href="#">NM_002036.2</a> | GPD;DARC;CCBP1                       | transmem           | integral to G-protein |
| GI_42822888-S | 153.9  | 142.3  | 170    | DKFZP572C1 | <a href="#">NM_033160.3</a> |                                      |                    | nucleus               |
| GI_42822890-S | 321.7  | 436.7  | 570    | C17orf37   | <a href="#">NM_032339.3</a> | C35;ORB3;XTP4;MGC14832               |                    |                       |
| GI_44662802-S | 83.8   | 92.1   | 109.3  | LOC389199  | <a href="#">NM_203423.1</a> | MGC35057                             |                    |                       |
| GI_44662806-S | 94.1   | 102.5  | 97.5   | LOC388407  | <a href="#">NM_203425.1</a> |                                      |                    |                       |
| GI_44662812-S | 241.9  | 277.9  | 255.5  | LOC92162   | <a href="#">NM_203411.1</a> | MGC71744                             |                    |                       |
| GI_44662814-S | 1212.2 | 1999.3 | 1766.7 | LOC286016  | <a href="#">NM_203419.1</a> |                                      |                    |                       |
| GI_44662816-S | 124.4  | 118.9  | 130.7  | LOC389123  | <a href="#">NM_203424.1</a> | MGC50809                             |                    |                       |
| GI_44662818-S | 123.5  | 133.5  | 117.1  | LOC164153  | <a href="#">NM_203412.1</a> |                                      |                    |                       |
| GI_44662820-S | 246.8  | 220.9  | 110.1  | LOC221091  | <a href="#">NM_203422.1</a> | MGC61707                             |                    |                       |
| GI_44662822-S | 120.2  | 105.7  | 109.8  | HFE2       | <a href="#">NM_145277.3</a> | JH;RGMC;HFE2A                        |                    |                       |
| GI_44662824-S | 5149.4 | 6566.3 | 7858.9 | KIAA0152   | <a href="#">NM_014730.2</a> |                                      |                    | integral to           |
| GI_44662825-I | 283.4  | 348.5  | 325.9  | DERP6      | <a href="#">NM_203414.1</a> | HSPC002                              |                    |                       |

|               |        |        |        |           |                             |                                    |             |              |              |
|---------------|--------|--------|--------|-----------|-----------------------------|------------------------------------|-------------|--------------|--------------|
| GI_44662829-A | 457.1  | 394.4  | 410    | DERP6     | <a href="#">NM_015362.3</a> | HSPC002                            |             |              |              |
| GI_44662831-I | 205.2  | 279    | 230.8  | DERP6     | <a href="#">NM_203413.1</a> | HSPC002                            |             |              |              |
| GI_44662835-S | 347.9  | 324.8  | 278.3  | BCAR1     | <a href="#">NM_014567.2</a> | CAS;CRKAS;P130CAS                  | signal      | cytoplasm    | cell         |
| GI_44662837-S | 195.5  | 200.6  | 135.6  | AMT       | <a href="#">NM_000481.2</a> | GCE;NKH;GCST                       | aminomet    | glycine      | glycine      |
| GI_44680104-I | 115    | 114.4  | 100.3  | CALD1     | <a href="#">NM_033138.2</a> | CDM;NAG22;MGC21352;H-CAD;L-CAD     | tropomyos   | cytoskelet   | muscle       |
| GI_44680111-S | 4331.8 | 2046.2 | 1388.1 | DSCR1     | <a href="#">NM_004414.5</a> | CSP1;DSC1;RCN1;MCIP1;ADAPT78       | DNA         | nucleus      | central      |
| GI_44680112-S | 2726.4 | 2294.9 | 2115.5 | DSCR2     | <a href="#">NM_003720.2</a> | C21LRP;LRPC21                      |             | membran      |              |
| GI_44680115-A | 134.4  | 561.1  | 178.4  | DSCR8     | <a href="#">NM_032589.2</a> | MMA-1;MTAG2;C21orf65               | molecular   | cellular_co  | biological_  |
| GI_44680118-I | 114.1  | 103.2  | 100.7  | DSCR8     | <a href="#">NM_203429.1</a> | MMA-1;MTAG2;C21orf65               | molecular   | cellular_co  | biological_  |
| GI_44680120-I | 187.6  | 164.3  | 125    | TRIM7     | <a href="#">NM_033342.2</a> | GNIP;RNF90                         | zinc ion    | intracellula |              |
| GI_44680127-I | 91.2   | 96.5   | 100    | TRIM7     | <a href="#">NM_203296.1</a> | GNIP;RNF90                         | zinc ion    | intracellula |              |
| GI_44680129-I | 113.6  | 106.9  | 106.4  | TRIM7     | <a href="#">NM_203297.1</a> | GNIP;RNF90                         | zinc ion    | intracellula |              |
| GI_44680131-S | 794.1  | 847.8  | 1005.8 | B3GNT5    | <a href="#">NM_032047.3</a> | B3GN-T5;beta3Gn-T5                 | galactosylt | membran      | protein      |
| GI_44680132-I | 89.2   | 93.8   | 94.1   | BDH       | <a href="#">NM_203315.1</a> | MGC2723;MGC4347;MGC9788            | 3-          | mitochond    | metabolis    |
| GI_44680134-A | 175    | 255.1  | 410.3  | BDH       | <a href="#">NM_004051.3</a> | MGC2723;MGC4347;MGC9788            | 3-          | mitochond    | metabolis    |
| GI_44680135-I | 111.3  | 121.8  | 117.6  | BDH       | <a href="#">NM_203314.1</a> | MGC2723;MGC4347;MGC9788            | 3-          | mitochond    | metabolis    |
| GI_44680137-S | 87.6   | 95.7   | 90.4   | BHLHB5    | <a href="#">NM_152414.3</a> | Beta3;CAGL85;TNRC20                |             |              |              |
| GI_44680138-S | 110.9  | 122.4  | 102.1  | BIRC8     | <a href="#">NM_033341.3</a> | ILP2;ILP-2;hILP2                   | apoptosis   | intracellula | anti-        |
| GI_44680142-A | 260    | 309.9  | 273.1  | SLC23A1   | <a href="#">NM_152685.2</a> | SVCT1;YSPL3;SLC23A2;MGC22361       | nucleobas   | integral to  | nucleobas    |
| GI_44680142-I | 105.5  | 107.4  | 94.9   | SLC23A1   | <a href="#">NM_152685.2</a> | SVCT1;YSPL3;SLC23A2;MGC22361       | nucleobas   | integral to  | nucleobas    |
| GI_44680144-I | 269.3  | 279.2  | 248.2  | SLC23A1   | <a href="#">NM_005847.3</a> | SVCT1;YSPL3;SLC23A2;MGC22361       | nucleobas   | integral to  | nucleobas    |
| GI_44680146-A | 94.8   | 123.5  | 105.3  | SLC23A2   | <a href="#">NM_005116.5</a> | NBTL1;SVCT2;YSPL2;SLC23A1;KIAA0238 | nucleobas   | integral to  | nucleobas    |
| GI_44680147-I | 144    | 135.4  | 143.3  | SLC23A2   | <a href="#">NM_203327.1</a> | NBTL1;SVCT2;YSPL2;SLC23A1;KIAA0238 | nucleobas   | integral to  | nucleobas    |
| GI_44680149-S | 114.4  | 134.4  | 127.5  | CLDN9     | <a href="#">NM_020982.2</a> |                                    | structural  | tight        |              |
| GI_44680150-S | 9380.7 | 8925   | 9632.9 | CRI1      | <a href="#">NM_014335.2</a> | EID1;EID-1;PTD014;C15orf3;PNAS-    | protein     | cellular_co  | biological_  |
| GI_44680151-S | 474.4  | 643.7  | 501.3  | FOSL2     | <a href="#">NM_005253.3</a> | FRA2;FLJ23306                      | transcripti | nucleus      | cell death   |
| GI_44680152-S | 797.6  | 508.1  | 337.5  | LOC388152 | <a href="#">NM_203426.1</a> | MGC60197                           |             |              |              |
| GI_44680155-S | 283    | 347.2  | 321.9  | ALG10     | <a href="#">NM_032834.2</a> | FLJ14751                           | transferas  |              |              |
| GI_44680157-S | 294.8  | 368.3  | 320.8  | PURB      | <a href="#">NM_033224.3</a> | PURBETA                            |             |              |              |
| GI_44680158-S | 193    | 476.2  | 275.7  | RaLP      | <a href="#">NM_203349.2</a> | MGC34023                           |             |              | intracellula |
| GI_44681483-S | 285    | 340.1  | 359.3  | CDCA2     | <a href="#">NM_152562.2</a> | FLJ25804                           |             |              |              |
| GI_44681485-S | 420.8  | 368    | 434.7  | LOC389792 | <a href="#">NM_203434.1</a> | MGC70833                           |             |              |              |
| GI_44771157-S | 205    | 1987.8 | 983.8  | IFI27     | <a href="#">NM_005532.2</a> | P27;ISG12                          | molecular   | integral to  | immune       |
| GI_44771172-S | 172.1  | 185    | 179.7  | GPR116    | <a href="#">NM_015234.3</a> | KIAA0758;DKFZp564O1923             | G-protein   | membran      | neuropepti   |
| GI_44771179-S | 1620.7 | 1204   | 1714.2 | NACSIN    | <a href="#">NM_015252.2</a> | KIAA0903                           | ubiquitin   |              | ubiquitin    |
| GI_44771197-S | 387.1  | 293.7  | 305.1  | PRMT3     | <a href="#">NM_005788.1</a> |                                    | N-          | cytoplasm    | N-terminal   |
| GI_44771200-S | 407.7  | 503    | 475.7  | KIAA1698  | <a href="#">NM_030628.1</a> |                                    |             |              |              |
| GI_44771205-S | 91.8   | 93.7   | 93.9   | ASCL4     | <a href="#">NM_203436.1</a> | HASH4                              |             |              |              |
| GI_44771210-S | 252.6  | 260.4  | 213.8  | THRAP2    | <a href="#">NM_015335.1</a> | KIAA1025;TRAP240L;PROSIT240        |             |              |              |
| GI_44829053-S | 474.7  | 518.9  | 490    | E2F4      | <a href="#">NM_001950.3</a> | E2F-4                              | transcripti | transcripti  | regulation   |
| GI_44888813-S | 299.6  | 278.6  | 322.6  | MGC21881  | <a href="#">NM_203448.1</a> |                                    |             |              |              |
| GI_44888815-S | 96.5   | 80.8   | 82.7   | FLJ20444  | <a href="#">NM_203449.1</a> |                                    |             |              |              |
| GI_44888817-S | 398.7  | 513.7  | 304.1  | KIAA0934  | <a href="#">NM_014974.1</a> |                                    | catalytic   |              | metabolis    |
| GI_44888819-S | 223.5  | 223.6  | 195.8  | KIAA0423  | <a href="#">NM_015091.1</a> |                                    | binding     | mitochond    | transport    |

|               |        |        |        |           |                             |                                    |              |             |              |
|---------------|--------|--------|--------|-----------|-----------------------------|------------------------------------|--------------|-------------|--------------|
| GI_44888824-S | 89.5   | 105    | 91.2   | LOC400120 | <a href="#">NM_203451.1</a> | MGC33996                           |              |             |              |
| GI_44888826-S | 348.4  | 425.6  | 385.3  | MGC39545  | <a href="#">NM_203452.1</a> |                                    |              |             |              |
| GI_44888828-S | 610.1  | 617.4  | 716.3  | LOC403313 | <a href="#">NM_203453.1</a> | MGC15483                           |              |             |              |
| GI_44888830-S | 244.6  | 298.5  | 274.8  | MGC26594  | <a href="#">NM_203454.1</a> | FLJ25691                           |              |             |              |
| GI_44888832-S | 128.5  | 117.9  | 118.3  | PDZK6     | <a href="#">NM_015693.2</a> | PDZD6;KIAA1284                     | protein      |             | intracellula |
| GI_44888834-S | 100.7  | 107.6  | 105.2  | ATP8B3    | <a href="#">NM_138813.1</a> | ATPIK                              | ATP          | integral to | cation       |
| GI_44889413-S | 968.2  | 956.9  | 945.1  | USP32     | <a href="#">NM_032582.3</a> | USP10;NY-REN-60                    | cysteine-    |             | ubiquitin-   |
| GI_44889474-S | 701.2  | 843.4  | 741.2  | RAB6IP1   | <a href="#">NM_015213.2</a> | KIAA1091                           |              |             |              |
| GI_44889476-I | 137.8  | 158.6  | 147.1  | SYNJ1     | <a href="#">NM_203446.1</a> | INPP5G                             | inositol-    | secretory   | synaptic     |
| GI_44889478-S | 111.5  | 129    | 119.7  | GJC1      | <a href="#">NM_152219.2</a> | GJA11;CX31.9                       | connexon     | connexon    | cell         |
| GI_44889480-S | 572.8  | 636.5  | 422.4  | MYO1B     | <a href="#">NM_012223.2</a> | myr1                               | actin        | myosin      |              |
| GI_44889482-S | 93.4   | 116.9  | 93.3   | CDR1      | <a href="#">NM_004065.2</a> | CDR;CDR34;CDR62A                   |              |             | cell growth  |
| GI_44889959-S | 78.4   | 84.7   | 69.2   | DOCK8     | <a href="#">NM_203447.1</a> | FLJ00026;FLJ00152                  |              |             |              |
| GI_44889961-A | 839.1  | 964.3  | 1103.9 | STMN1     | <a href="#">NM_005563.3</a> | Lag;SMN;OP18;PP17;PP19;PR22;LAP18  | signal       | cytosol     | cell growth  |
| GI_44890049-I | 124.2  | 123.6  | 121.2  | STMN1     | <a href="#">NM_203399.1</a> | Lag;SMN;OP18;PP17;PP19;PR22;LAP18  | signal       | cytosol     | cell growth  |
| GI_44890051-I | 113.3  | 113.7  | 127.6  | STMN1     | <a href="#">NM_203401.1</a> | Lag;SMN;OP18;PP17;PP19;PR22;LAP18  | signal       | cytosol     | cell growth  |
| GI_44890053-S | 254.5  | 209.1  | 196.7  | STK33     | <a href="#">NM_030906.2</a> |                                    | protein-     |             | protein      |
| GI_44890054-S | 174    | 208.1  | 195.2  | SSTR2     | <a href="#">NM_001050.2</a> |                                    | somatosta    | integral to | negative     |
| GI_44890055-S | 132.3  | 162.7  | 144.3  | SSTR3     | <a href="#">NM_001051.2</a> |                                    | somatosta    | integral to | induction    |
| GI_44890057-S | 257.8  | 328.1  | 277.9  | ACDC      | <a href="#">NM_004797.2</a> | APM1;APM-1;GBP28;ACRP30;ADIPOQ     | hormone      | microfibril | energy       |
| GI_44890058-S | 132.4  | 140.1  | 145.6  | IVL       | <a href="#">NM_005547.2</a> |                                    | structural   | cytosol     |              |
| GI_44890060-S | 3792.1 | 6433.2 | 4233.7 | PPIB      | <a href="#">NM_000942.4</a> | CYPB;SCYLP;CYP-S1;MGC2224;MGC14109 | chaperone    | endoplas    | protein      |
| GI_44890061-S | 665    | 596.4  | 556    | C14orf43  | <a href="#">NM_194278.2</a> | c14_5541                           | DNA          | nucleus     |              |
| GI_44890063-S | 113.7  | 118.7  | 119.7  | INSM1     | <a href="#">NM_002196.2</a> | IA1;IA-1                           | DNA          | nucleus     | regulation   |
| GI_44890064-S | 1280.6 | 817.5  | 677.1  | C2orf3    | <a href="#">NM_003203.3</a> | GCF;TCF9;DNABF                     | RNA          | nucleus     | regulation   |
| GI_44890066-S | 660.2  | 398    | 376.1  | JUN       | <a href="#">NM_002228.3</a> | AP1                                | RNA          | nuclear     | regulation   |
| GI_44890067-S | 585.4  | 541.8  | 415.1  | ZNF262    | <a href="#">NM_005095.2</a> | MYM;CDIR;KIAA0425;ZNF198L3         | DNA          | extracellul | developm     |
| GI_44890236-A | 403.1  | 660.9  | 187.4  | CALD1     | <a href="#">NM_033140.2</a> | CDM;NAG22;MGC21352;H-CAD;L-CAD     | tropomyos    | cytoskelet  | muscle       |
| GI_44917602-S | 124    | 133.9  | 139.7  | ZNF305    | <a href="#">NM_014724.2</a> | ZFP96;ZNF29K1;KIAA0426;dJ29K1.2    | transcripti  | nucleus     | regulation   |
| GI_44917603-S | 857.1  | 502.4  | 569.9  | SRGAP1    | <a href="#">NM_020762.1</a> | ARHGAP13;KIAA1304                  |              |             |              |
| GI_44917605-S | 221.1  | 209.2  | 178.4  | NAPB      | <a href="#">NM_022080.1</a> | SNAP-BETA                          | intracellula | Golgi       | intracellula |
| GI_44917607-S | 289.8  | 401.3  | 436.9  | MGRN1     | <a href="#">NM_015246.1</a> | GP2B;CD41B;ITGA2B;RNF156;KIAA0544  |              |             |              |
| GI_44917609-S | 265.5  | 301.8  | 271.1  | KIAA1510  | <a href="#">NM_020882.1</a> |                                    | structural   | microfibril | cell         |
| GI_44917611-S | 340.4  | 312.5  | 324.2  | KIF1C     | <a href="#">NM_006612.3</a> | LTXS1;KIAA0706                     | adenosine    | Golgi       | retrograde   |
| GI_44917612-S | 115.2  | 127    | 116    | LOC163782 | <a href="#">NM_181712.2</a> |                                    |              |             |              |
| GI_44917616-S | 466.8  | 489.4  | 625    | N2N       | <a href="#">NM_203458.1</a> |                                    |              |             |              |
| GI_44917618-S | 252.1  | 320.4  | 277.9  | KIAA0265  | <a href="#">NM_014997.1</a> |                                    |              |             |              |
| GI_44921601-S | 749.9  | 730    | 818.8  | ZNF524    | <a href="#">NM_153219.2</a> | MGC23143                           | DNA          | nucleus     | regulation   |
| GI_44921602-S | 3021.4 | 3122.6 | 2642.8 | ZNF358    | <a href="#">NM_018083.2</a> | ZFEND;FLJ10390                     | DNA          | nucleus     | regulation   |
| GI_44921604-S | 131.4  | 165    | 135.2  | TBX2      | <a href="#">NM_005994.3</a> | FLJ10169                           | DNA          | nucleus     | regulation   |
| GI_44921605-A | 127.9  | 139.4  | 116.7  | SYNJ1     | <a href="#">NM_003895.2</a> | INPP5G                             | inositol-    | secretory   | synaptic     |
| GI_44921609-S | 110.4  | 123.4  | 125    | LOC134548 | <a href="#">NM_175873.3</a> |                                    |              |             |              |
| GI_44921611-S | 97.9   | 111.2  | 108.4  | JUNB      | <a href="#">NM_002229.2</a> |                                    | transcripti  | chromatin   | regulation   |
| GI_44921612-S | 107.5  | 110    | 105.4  | KIP2      | <a href="#">NM_006383.2</a> |                                    | protein      |             |              |



|               |         |        |        |           |                             |                                       |             |              |             |
|---------------|---------|--------|--------|-----------|-----------------------------|---------------------------------------|-------------|--------------|-------------|
| GI_44921613-S | 82.7    | 73.6   | 89.9   | GPR73     | <a href="#">NM_138964.2</a> | ZAQ;PKR1;GPR73a                       | rhodopsin-  | integral to  | G-protein   |
| GI_44921614-S | 125     | 132.2  | 141.6  | EXOC8     | <a href="#">NM_175876.2</a> | EXO84;SEC84;Exo84p                    |             |              |             |
| GI_44955890-I | 219.3   | 228.7  | 224.2  | ARFD1     | <a href="#">NM_001656.3</a> | ARD1;RNF46;TRIM23                     | GTPase      | intracellula | small       |
| GI_44955904-A | 97      | 99.7   | 89.4   | ARFD1     | <a href="#">NM_033228.2</a> | ARD1;RNF46;TRIM23                     | GTPase      | intracellula | small       |
| GI_44955909-S | 1250.3  | 1100.1 | 1675.4 | E2F7      | <a href="#">NM_203394.1</a> |                                       |             |              |             |
| GI_44955913-S | 122.3   | 127.3  | 113.1  | EDG4      | <a href="#">NM_004720.4</a> | LPA2;EDG-4                            | lipid       | integral to  | cytosolic   |
| GI_44955920-S | 264     | 213.6  | 191.1  | ELK3      | <a href="#">NM_005230.2</a> | ERP;NET;SAP2                          | transcripti | nucleus      | signal      |
| GI_44955925-S | 432.7   | 639.2  | 491.2  | KIAA0182  | <a href="#">NM_014615.1</a> |                                       |             |              |             |
| GI_44955928-S | 1235    | 1153   | 1288.9 | KIAA1078  | <a href="#">NM_203459.1</a> |                                       |             |              |             |
| GI_44955932-I | 1572.6  | 1841.5 | 1741   | UBQLN1    | <a href="#">NM_013438.3</a> | DA41;DSK2;XDRP1;PLIC-1                |             |              |             |
| GI_45006902-S | 159.9   | 178.2  | 180.8  | MEIS1     | <a href="#">NM_002398.2</a> |                                       | RNA         | nucleus      | oncogene    |
| GI_45006928-S | 121.9   | 132.7  | 108.5  | MYCL2     | <a href="#">NM_005377.2</a> |                                       | transcripti | nucleus      | regulation  |
| GI_45006950-S | 387.9   | 370.3  | 331.2  | DHODH     | <a href="#">NM_001361.2</a> | DHOdehase                             | dihydrooro  | membran      | 'de novo'   |
| GI_45006969-S | 748.6   | 848.3  | 616.2  | DR1       | <a href="#">NM_001938.2</a> | NC2;NC2-BETA                          | transcripti | nucleus      | negative    |
| GI_45006985-S | 1530.7  | 1306   | 1104.1 | SCYE1     | <a href="#">NM_004757.2</a> | p43;EMAP2;EMAP-2;EMAPII;EMAP II;EMAP- | cytokine    | extracellul  | tRNA        |
| GI_45007001-S | 1040.4  | 946.6  | 745.3  | LOC253782 | <a href="#">NM_203463.1</a> |                                       |             |              |             |
| GI_45007006-S | 180.1   | 224.3  | 131.5  | OAS3      | <a href="#">NM_006187.2</a> | p100                                  | antiviral   | microsom     | nucleobas   |
| GI_45007020-S | 80.1    | 95.4   | 81     | TEX12     | <a href="#">NM_031275.3</a> |                                       |             |              |             |
| GI_45007036-S | 108.7   | 122.1  | 128.7  | WASF2     | <a href="#">NM_006990.2</a> | SCAR2;WAVE2;dJ393P12.2                | actin       | actin        | actin       |
| GI_4501840-S  | 16506.2 | 9915.2 | 8606.7 | AARS      | <a href="#">NM_001605.1</a> |                                       | tRNA        | soluble      | alanyl-     |
| GI_4501844-S  | 84.5    | 96.5   | 82.1   | AANAT     | <a href="#">NM_001088.1</a> | SNAT;AA-NAT                           | aralkylami  |              | circadian   |
| GI_4501848-S  | 120.4   | 127.2  | 111.8  | ABCA3     | <a href="#">NM_001089.1</a> | ABC3;ABC-C;LBM180;EST111653           | ATP         | integral to  | drug        |
| GI_4501850-S  | 177.5   | 189.3  | 164.3  | ABP1      | <a href="#">NM_001091.1</a> | DAO;AOC1                              | amine       | peroxisom    | metabolis   |
| GI_4501854-S  | 123.7   | 133.3  | 104.8  | ACACB     | <a href="#">NM_001093.1</a> | ACC2;ACCB;HACC275                     | acetyl-     | biotin       | biotin      |
| GI_4501856-S  | 116.2   | 113.8  | 109.7  | ACADL     | <a href="#">NM_001608.1</a> | LCAD;ACAD4                            | long-chain- | mitochond    | electron    |
| GI_4501866-S  | 835.2   | 1172.8 | 1128.4 | ACO2      | <a href="#">NM_001098.1</a> |                                       | aconitate   | mitochond    | citrate     |
| GI_4501868-S  | 955.6   | 1673.6 | 1442.2 | ACOX2     | <a href="#">NM_003500.1</a> | BCOX;BRCOX;BRCACOX                    | acyl-CoA    | peroxisom    | bile acid   |
| GI_4501870-S  | 316     | 317.8  | 276    | ACOX3     | <a href="#">NM_003501.1</a> |                                       | acyl-CoA    | peroxisom    | bile acid   |
| GI_4501876-S  | 117.2   | 118.5  | 109    | ACR       | <a href="#">NM_001097.1</a> |                                       | acrosin     |              | acrosome    |
| GI_4501882-S  | 5137.1  | 4689.5 | 3434.6 | ACTA2     | <a href="#">NM_001613.1</a> | ACTSA                                 | structural  | actin        | muscle      |
| GI_4501892-S  | 95.8    | 134.3  | 93.6   | ACTN2     | <a href="#">NM_001103.1</a> |                                       | structural  | actin        |             |
| GI_4501900-S  | 979     | 1389.5 | 1311.2 | ACY1      | <a href="#">NM_000666.1</a> | ACYLASE                               | aminoacyl   | cytosol      | amino       |
| GI_4501912-S  | 214.2   | 138.3  | 231.8  | ADAM23    | <a href="#">NM_003812.1</a> | MDC3                                  | integrin    | integral to  | central     |
| GI_4501914-S  | 957.5   | 1585.4 | 902.9  | ADAM9     | <a href="#">NM_003816.1</a> | MCMP;MDC9;Mltng;KIAA0021              | integrin    | integral to  | protein     |
| GI_4501944-S  | 120.1   | 119.1  | 111.4  | ADM       | <a href="#">NM_001124.1</a> | AM                                    | receptor    | soluble      | progester   |
| GI_4501946-S  | 349.2   | 469.3  | 292.4  | ADORA1    | <a href="#">NM_000674.1</a> | RDC7                                  | adenosine   | integral to  | phagocyto   |
| GI_4501960-I  | 97.5    | 110.3  | 91.3   | ADRA1A    | <a href="#">NM_000680.1</a> | ADRA1C;ADRA1L1                        | alpha1-     | integral to  | protein     |
| GI_4501988-S  | 98.9    | 113.1  | 82.2   | AFP       | <a href="#">NM_001134.1</a> | FETA;HPAFP                            | plasma      | extracellul  | immune      |
| GI_4501990-A  | 124.4   | 147.6  | 137.9  | AGC1      | <a href="#">NM_001135.1</a> | CSPG1;MSK16;CSPGCP                    | chondroiti  | extracellul  | heterophili |
| GI_4501992-S  | 516.2   | 543    | 408.1  | AGPS      | <a href="#">NM_003659.1</a> | ADAS;ADPS;ADAP-S;ADHAPS;ALDHPSY       | alkylglycer | peroxisom    | lipid       |
| GI_4501994-I  | 96.8    | 96.4   | 79     | AGRP      | <a href="#">NM_001138.1</a> | ART;AGRT;ASIP2                        | neuropepti  |              | neuropepti  |
| GI_4502004-S  | 118.2   | 118    | 116.8  | AHSG      | <a href="#">NM_001622.1</a> | AHS;HSGA;FETUA                        | proteoglyc  | soluble      | ossificatio |
| GI_4502008-S  | 1113.9  | 1223.8 | 1209.1 | AIP       | <a href="#">NM_003977.1</a> | ARA9;XAP2;FKBP37                      | transcripti | cytoplasm    | protein     |
| GI_4502010-S  | 403.8   | 490.5  | 420.3  | AK1       | <a href="#">NM_000476.1</a> |                                       | adenylate   | cytosol      | ATP         |

|              |        |        |        |          |                             |                                   |             |             |             |
|--------------|--------|--------|--------|----------|-----------------------------|-----------------------------------|-------------|-------------|-------------|
| GI_4502028-S | 333.6  | 199.7  | 209.4  | ALCAM    | <a href="#">NM_001627.1</a> | MEMD;CD166                        | receptor    | membran     | cell        |
| GI_4502040-S | 132.6  | 298.2  | 1471.9 | ALDH1A3  | <a href="#">NM_000693.1</a> | ALDH6;RALDH3;ALDH1A6              | aldehyde    |             | alcohol     |
| GI_4502042-S | 1600.2 | 1641.6 | 1259.8 | ALDH3B1  | <a href="#">NM_000694.1</a> | ALDH4;ALDH7                       | aldehyde    |             | alcohol     |
| GI_4502050-S | 175    | 221.6  | 191.8  | ALOX12   | <a href="#">NM_000697.1</a> | LOG12                             | arachidon   |             | fatty acid  |
| GI_4502052-S | 170    | 200.6  | 185.3  | ALOX12B  | <a href="#">NM_001139.1</a> | 12R-LOX                           | arachidon   |             | epidermal   |
| GI_4502056-S | 194.3  | 236.7  | 199    | ALOX5    | <a href="#">NM_000698.1</a> | LOG5                              | arachidon   |             | leukotrien  |
| GI_4502072-S | 318.7  | 370.6  | 339.7  | AMELY    | <a href="#">NM_001143.1</a> | AMGL;AMGY                         | extracellul | extracellul | developm    |
| GI_4502078-S | 372.1  | 493.2  | 616.8  | AMPD3    | <a href="#">NM_000480.1</a> |                                   | AMP         |             | AMP         |
| GI_4502094-S | 2463.3 | 2351.2 | 2346.3 | ANPEP    | <a href="#">NM_001150.1</a> | CD13;LAP1;PEPN;gp150              | aminopept   | proteoglyc  | pathogene   |
| GI_4502096-S | 1095.1 | 886.5  | 1152.3 | SLC25A4  | <a href="#">NM_001151.1</a> | T1;ANT;ANT1;PEO2;PEO3             | adenine     | mitochond   | mitochond   |
| GI_4502098-S | 6759.7 | 7276.8 | 5492.9 | SLC25A5  | <a href="#">NM_001152.1</a> | T2;T3;ANT2                        | adenine     | mitochond   | small       |
| GI_4502100-S | 6348.4 | 4957.9 | 5673.9 | ANXA1    | <a href="#">NM_000700.1</a> | ANX1;LPC1                         | phospholi   |             | lipid       |
| GI_4502102-S | 177.3  | 195.6  | 177.4  | ANXA9    | <a href="#">NM_003568.1</a> | ANX31                             | phospholi   |             |             |
| GI_4502112-S | 364.3  | 853.7  | 380.4  | ANXA8    | <a href="#">NM_001630.1</a> | ANX8                              | phospholi   |             | oncogene    |
| GI_4502114-S | 126.2  | 136.5  | 117.3  | AOAH     | <a href="#">NM_001637.1</a> |                                   | catalytic   | integral to | lipid       |
| GI_4502144-S | 891.7  | 959.8  | 940.2  | BIRC5    | <a href="#">NM_001168.1</a> | API4;EPR-1;SURVIVIN               | apoptosis   | spindle     | G2/M        |
| GI_4502146-S | 1772.6 | 1604.6 | 2809.8 | APLP2    | <a href="#">NM_001642.1</a> | APPH;APPL2;CDEBP                  |             |             |             |
| GI_4502148-S | 78.2   | 84.7   | 75.6   | APOA2    | <a href="#">NM_001643.1</a> |                                   | high-       |             | lipid       |
| GI_4502152-S | 103.5  | 101.7  | 94     | APOB     | <a href="#">NM_000384.1</a> | FLDB                              | low-        | microsom    | circulation |
| GI_4502160-S | 104    | 109.4  | 106.4  | APOC4    | <a href="#">NM_001646.1</a> |                                   | apolipopro  |             | lipid       |
| GI_4502162-S | 127.2  | 150.2  | 153.9  | APOD     | <a href="#">NM_001647.1</a> |                                   | high-       | extracellul | lipid       |
| GI_4502164-S | 100.8  | 91.2   | 91.6   | APOF     | <a href="#">NM_001638.1</a> |                                   | cholestero  | integral to | lipid       |
| GI_4502170-S | 2529.5 | 2863.2 | 2670.4 | APRT     | <a href="#">NM_000485.1</a> | AMP                               | adenine     |             | nucleoside  |
| GI_4502182-S | 114.6  | 110.4  | 110.2  | AQP5     | <a href="#">NM_001651.1</a> |                                   | water       | integral to | water       |
| GI_4502186-S | 130.9  | 125.4  | 125.1  | AQP7     | <a href="#">NM_001170.1</a> | AQP9;AQP7L;AQPap                  | glycerol    | integral to | glycerol    |
| GI_4502192-S | 427.2  | 539.6  | 560.9  | ARAF1    | <a href="#">NM_001654.1</a> | PKS2;A-RAF;RAFA1                  | protein     | cellular_co | oncogene    |
| GI_4502202-S | 572.1  | 732.2  | 864.9  | ARF3     | <a href="#">NM_001659.1</a> |                                   | GTPase      | Golgi       | nonselecti  |
| GI_4502218-S | 1862.2 | 1512.7 | 1953.7 | ARHG     | <a href="#">NM_001665.1</a> |                                   | Rho small   |             | Rho         |
| GI_4502220-S | 92.3   | 98.7   | 101.1  | ARHGAP5  | <a href="#">NM_001173.1</a> | P190-B;RHOGAP5                    | GTPase      | peripheral  | Rho         |
| GI_4502224-S | 193.9  | 217.1  | 205.4  | ARHGDI3  | <a href="#">NM_001176.1</a> |                                   | Rho GDP-    | peripheral  | negative    |
| GI_4502228-S | 8847.1 | 6644.5 | 10273  | ARL2     | <a href="#">NM_001667.1</a> | ARFL2                             | GTPase      |             | tubulin     |
| GI_4502238-A | 107.4  | 123.3  | 121.4  | ARSD     | <a href="#">NM_001669.1</a> |                                   | arylsulfata |             |             |
| GI_4502238-I | 119.4  | 151.3  | 125.8  | ARSD     | <a href="#">NM_001669.1</a> |                                   | arylsulfata |             |             |
| GI_4502240-S | 174.1  | 235.9  | 171.1  | ARSE     | <a href="#">NM_000047.1</a> | CDPX;CDPX1;CDPXR                  | arylsulfata |             | skeletal    |
| GI_4502246-S | 111.5  | 132.5  | 131    | ARVCF    | <a href="#">NM_001670.1</a> |                                   | structural  | kinesin     | cell        |
| GI_4502248-S | 1527.8 | 1855.7 | 1224   | DDEF2    | <a href="#">NM_003887.1</a> | PAP;PAG3;SHAG1;KIAA0400;Pap-alpha | enzyme      | nucleus     | nonselecti  |
| GI_4502260-S | 134.4  | 143.7  | 130.4  | SERPINC1 | <a href="#">NM_000488.1</a> | AT3;ATIII                         | serine      |             |             |
| GI_4502262-A | 117.1  | 104.5  | 105.6  | ATF3     | <a href="#">NM_001674.1</a> |                                   | transcripti | nucleus     | regulation  |
| GI_4502270-S | 111.8  | 115.9  | 118.3  | ATP1A2   | <a href="#">NM_000702.1</a> | FHM2;MHP2                         | sodium/po   | sodium/po   | sodium      |
| GI_4502280-S | 3944.4 | 3929   | 3674.4 | ATP1B3   | <a href="#">NM_001679.1</a> | FLJ29027                          | sodium/po   | sodium/po   | small       |
| GI_4502286-S | 567.8  | 344.6  | 459.5  | ATP2B1   | <a href="#">NM_001682.1</a> | PMCA1                             | calcium-    | integral to | small       |
| GI_4502290-S | 89.3   | 104.2  | 97.9   | ATP4A    | <a href="#">NM_000704.1</a> | ATP6A                             | hydrogen/   | integral to | small       |
| GI_4502300-S | 5063   | 6849.1 | 5736.8 | ATP5G3   | <a href="#">NM_001689.1</a> |                                   | hydrogen-   | proton-     | energy      |
| GI_4502320-S | 178.5  | 180.1  | 167.7  | ATP7A    | <a href="#">NM_000052.1</a> | MK;MNK;OHS                        | copper-     | Golgi       | copper ion  |

|              |        |        |        |         |                             |                                    |             |              |            |
|--------------|--------|--------|--------|---------|-----------------------------|------------------------------------|-------------|--------------|------------|
| GI_4502322-S | 287.9  | 307.7  | 322.4  | ATP7B   | <a href="#">NM_000053.1</a> | WND                                | copper-     | Golgi        | copper ion |
| GI_4502326-S | 455.6  | 521    | 837.9  | AUH     | <a href="#">NM_001698.1</a> |                                    | mRNA 3'     | mitochond    | mRNA       |
| GI_4502352-S | 892    | 756.2  | 423.4  | BACH1   | <a href="#">NM_001186.1</a> |                                    | transcripti | nucleus      | regulation |
| GI_4502354-S | 162.4  | 172.5  | 178.5  | BAI1    | <a href="#">NM_001702.1</a> |                                    | protein     | intercellula | axonogen   |
| GI_4502356-S | 296.6  | 447.9  | 335.3  | BAI2    | <a href="#">NM_001703.1</a> |                                    | tumor       | integral to  | neuropepti |
| GI_4502358-S | 80.2   | 91.1   | 75.1   | BAI3    | <a href="#">NM_001704.1</a> | KIAA0550                           | tumor       | integral to  | neuropepti |
| GI_4502368-S | 108.8  | 228.8  | 171.9  | BBOX1   | <a href="#">NM_003986.1</a> | BBH;BBOX;G-BBH;gamma-BBH           | gamma-      |              | carnitine  |
| GI_4502370-S | 5744.3 | 4141.7 | 4086.2 | BCAR3   | <a href="#">NM_003567.1</a> | NSP2;SH2D3B                        | guanyl-     |              | drug       |
| GI_4502372-S | 152.4  | 165.6  | 144.6  | BCAS1   | <a href="#">NM_003657.1</a> | AIBC1;NABC1                        |             |              | oncogene   |
| GI_4502374-S | 1355.4 | 791.8  | 1296.5 | BCAT2   | <a href="#">NM_001190.1</a> | BCAM;BCT2                          | branched-   | mitochond    | branched   |
| GI_4502386-S | 88.4   | 96.3   | 92.2   | OPN1SW  | <a href="#">NM_001708.1</a> | BCP;CBT                            | opsin       | integral to  | vision     |
| GI_4502406-S | 194.9  | 252.4  | 215.9  | BHMT    | <a href="#">NM_001713.1</a> |                                    | homocyst    |              |            |
| GI_4502408-S | 142.7  | 146.9  | 135.1  | BICD1   | <a href="#">NM_001714.1</a> |                                    | structural  | Golgi        | RNA        |
| GI_4502418-S | 992.1  | 665.5  | 678.6  | BLVRB   | <a href="#">NM_000713.1</a> | FLR;BVRB                           | biliverdin  |              |            |
| GI_4502426-S | 110.7  | 115    | 99.9   | BMP7    | <a href="#">NM_001719.1</a> | OP-1                               |             |              | skeletal   |
| GI_4502430-S | 95.6   | 99.4   | 87.6   | BMPR1B  | <a href="#">NM_001203.1</a> | ALK6;ALK-6                         | transmem    | integral to  | transmem   |
| GI_4502436-S | 911.1  | 796.6  | 782.2  | POLR3D  | <a href="#">NM_001722.1</a> | RPC4;BN51T;TSBN51                  | DNA-        | nucleus      | regulation |
| GI_4502446-S | 139.7  | 179.8  | 147.1  | BPI     | <a href="#">NM_001725.1</a> |                                    | Gram-       | integral to  | immune     |
| GI_4502450-S | 111    | 119.7  | 110.9  | BRCA2   | <a href="#">NM_000059.1</a> | FAD;FAD1;FANCB;FANCD1              | tumor       | secretory    | establish  |
| GI_4502452-S | 110.6  | 115.8  | 105.7  | BRDT    | <a href="#">NM_001726.1</a> | BRD6                               | protein     | nucleus      |            |
| GI_4502454-S | 201.5  | 263.6  | 235.3  | BRS3    | <a href="#">NM_001727.1</a> |                                    | bombesin    | integral to  | adult      |
| GI_4502460-S | 94.9   | 109.4  | 96.8   | BTC     | <a href="#">NM_001729.1</a> |                                    | epidermal   | soluble      | positive   |
| GI_4502466-S | 98.4   | 116.9  | 96.2   | BTF3L1  | <a href="#">NM_001208.1</a> | OPG;OCIF;HUMBTFB;TNFRSF11B         | transcripti | nucleus      | regulation |
| GI_4502472-S | 5478.9 | 4414.5 | 4363.9 | BTG1    | <a href="#">NM_001731.1</a> |                                    | cell cycle  |              | negative   |
| GI_4502474-S | 135.7  | 169.5  | 146    | BTN1A1  | <a href="#">NM_001732.1</a> | BT;BTN                             | receptor    | integral to  |            |
| GI_4502484-S | 446.3  | 588.9  | 513    | C11orf8 | <a href="#">NM_001584.1</a> | 239FB;FAM1B;D11S302E;Hs.46638      | hydrolase   |              | neurogene  |
| GI_4502508-S | 360.9  | 295.5  | 254.3  | C5R1    | <a href="#">NM_001736.1</a> | C5A;C5AR;CD88                      | C5a         | integral to  | activation |
| GI_4502516-S | 124.4  | 131.1  | 118.6  | CA1     | <a href="#">NM_001738.1</a> |                                    | carbonate   | cytoplasm    | one-       |
| GI_4502520-S | 97.3   | 85.4   | 92     | CA5A    | <a href="#">NM_001739.1</a> | CA5;CAV;CAVA                       | carbonate   | mitochond    | one-       |
| GI_4502522-S | 95.8   | 100.5  | 85.3   | CACNA1B | <a href="#">NM_000718.1</a> | CACNN;CACNL1A5                     | voltage-    | voltage-     | small      |
| GI_4502526-S | 302.5  | 332.2  | 279.8  | CACNA1D | <a href="#">NM_000720.1</a> | CCHL1A2;CACNL1A2                   | dihydropyr  | voltage-     | small      |
| GI_4502528-S | 246.3  | 277.9  | 270.2  | CACNA1E | <a href="#">NM_000721.1</a> | Cav2.3;CACNL1A6                    | voltage-    | voltage-     | small      |
| GI_4502536-S | 136.2  | 118.8  | 119.6  | CACNB4  | <a href="#">NM_000726.1</a> |                                    | voltage-    | voltage-     | small      |
| GI_4502544-S | 223    | 268.4  | 238.1  | CALCA   | <a href="#">NM_001741.1</a> | CT;KC;CGRP;CALC1;CGRP1;CGRP-I      | receptor    | soluble      | regulation |
| GI_4502546-S | 138.1  | 161.5  | 140.5  | CALCR   | <a href="#">NM_001742.1</a> | CRT;CTR;CTR1                       | calcitonin  | integral to  | phosphati  |
| GI_4502560-S | 3046.6 | 1531.2 | 606.6  | CAPG    | <a href="#">NM_001747.1</a> | MCP;AFCP                           | barbed-     | F-actin      | response   |
| GI_4502564-S | 2621   | 3844.2 | 4738.6 | CAPNS1  | <a href="#">NM_001749.1</a> | 30K;CANP;CDPS;CANPS;CAPN4          | calpain     |              | positive   |
| GI_4502566-S | 393.2  | 559.6  | 549.4  | CASK    | <a href="#">NM_003688.1</a> | LIN2                               | membran     | actin        | cell       |
| GI_4502598-S | 313.3  | 406.9  | 395.2  | CBR1    | <a href="#">NM_001757.1</a> | CBR                                | carbonyl    | cytosol      | metabolis  |
| GI_4502602-S | 80.2   | 80.7   | 86.4   | CBX4    | <a href="#">NM_003655.1</a> | PC2;hPC2                           | transcripti | chromatin    | negative   |
| GI_4502606-S | 127    | 151.1  | 144.3  | CCKAR   | <a href="#">NM_000730.1</a> |                                    | cholecysto  | integral to  | cytosolic  |
| GI_4502620-S | 216.4  | 243.2  | 306.7  | CCNF    | <a href="#">NM_001761.1</a> | FBX1;FBXO1                         | cyclin-     | nucleus      | regulation |
| GI_4502630-S | 245.9  | 195.9  | 381.5  | CCR1    | <a href="#">NM_001295.1</a> | CKR-1;HM145;CMKBR1;MIP1aR          | chemokin    | integral to  | cytosolic  |
| GI_4502638-S | 128.2  | 132.8  | 118.4  | CCR5    | <a href="#">NM_000579.1</a> | CKR5;CD195;CKR-5;CCCKR5;CMKBR5;CC- | chemokin    | endosome     | phosphati  |

|              |        |        |        |         |                             |                              |              |                        |
|--------------|--------|--------|--------|---------|-----------------------------|------------------------------|--------------|------------------------|
| GI_4502644-S | 100.1  | 106.2  | 99.4   | CD1B    | <a href="#">NM_001764.1</a> | CD1                          | endosome     | antimicrob             |
| GI_4502646-S | 279.8  | 305.3  | 270.5  | CD1C    | <a href="#">NM_001765.1</a> | CD1                          | integral to  | antimicrob             |
| GI_4502650-S | 1072.7 | 330.5  | 263.6  | CD22    | <a href="#">NM_001771.1</a> | SIGLEC-2                     | cell         | integral to cell       |
| GI_4502654-S | 1250.1 | 943.1  | 294.5  | CD33    | <a href="#">NM_001772.1</a> | p67;SIGLEC-3                 | receptor     | integral to negative   |
| GI_4502658-S | 227.9  | 287.3  | 253.1  | SIGLEC5 | <a href="#">NM_003830.1</a> | OBBP2;CD33L2;OB-BP2;SIGLEC-5 | lectin [goid | integral to cell       |
| GI_4502660-S | 142.5  | 172.1  | 129.2  | CD34    | <a href="#">NM_001773.1</a> |                              | lymphocyt    | integral to cell       |
| GI_4502662-S | 92.8   | 89.2   | 76.8   | CD37    | <a href="#">NM_001774.1</a> | GP52-40                      |              | integral to N-linked   |
| GI_4502668-S | 142.9  | 279.2  | 172    | CD3D    | <a href="#">NM_000732.1</a> | T3D;CD3-DELTA                | T-cell       | integral to cell       |
| GI_4502670-S | 95.8   | 112.4  | 105.1  | CD3E    | <a href="#">NM_000733.1</a> | T3E;TCRE                     | T-cell       | integral to signal     |
| GI_4502676-S | 1181.9 | 1352.5 | 1355.6 | CD58    | <a href="#">NM_001779.1</a> | LFA3                         | cell         | membran cell           |
| GI_4502680-S | 97.7   | 97.5   | 97     | CD69    | <a href="#">NM_001781.1</a> |                              | transmem     | integral to defense    |
| GI_4502682-S | 174.6  | 228.8  | 199    | CD72    | <a href="#">NM_001782.1</a> | LYB2                         | receptor     | integral to cell       |
| GI_4502684-I | 118    | 115.1  | 98.7   | CD79A   | <a href="#">NM_001783.1</a> | IGA;MB-1                     | transmem     | integral to defense    |
| GI_4502686-S | 132.8  | 160    | 145.7  | CD84    | <a href="#">NM_003874.1</a> | LY9B;hCD84;mCD84;SLAMF5      | lymphocyt    | integral to homophili  |
| GI_4502744-S | 382.7  | 422.3  | 357.7  | CDK8    | <a href="#">NM_001260.1</a> | K35                          | cell cycle   | regulation             |
| GI_4502754-S | 94.4   | 94.3   | 88.4   | CDO1    | <a href="#">NM_001801.1</a> |                              | electron     |                        |
| GI_4502760-S | 87.3   | 113.2  | 93.6   | CDW52   | <a href="#">NM_001803.1</a> | CD52                         | lymphocyt    | membran                |
| GI_4502762-S | 109.6  | 124.6  | 95.8   | CDX1    | <a href="#">NM_001804.1</a> |                              | transcripti  | nucleus histogene      |
| GI_4502778-S | 220.3  | 255.8  | 271.9  | CENPC1  | <a href="#">NM_001812.1</a> | CENPC                        | DNA          | kinetochor chromoso    |
| GI_4502780-S | 291.3  | 305.3  | 236.2  | CENPE   | <a href="#">NM_001813.1</a> | KIF10                        | kinetochor   | kinetochor mitotic     |
| GI_4502792-S | 124.6  | 139.5  | 118    | CEACAM3 | <a href="#">NM_001815.1</a> | CGM1;CD66D                   | tumor        | integral to            |
| GI_4502796-S | 115.1  | 112    | 113.6  | CEACAM4 | <a href="#">NM_001817.1</a> | CGM7                         | tumor        | membran                |
| GI_4502798-S | 169    | 195.2  | 185.6  | CHAD    | <a href="#">NM_001267.1</a> | SLRR4A                       | extracellul  | extracellul regulation |
| GI_4502806-S | 259.2  | 255.2  | 228.7  | CHGB    | <a href="#">NM_001819.1</a> | SCG1                         | peptide      | extracellul regulation |
| GI_4502808-S | 157.3  | 189.8  | 162    | CHIT1   | <a href="#">NM_003465.1</a> | CHIT                         | chitinase    | extracellul response   |
| GI_4502810-S | 174.3  | 199.1  | 187.7  | CHML    | <a href="#">NM_001821.1</a> | REP2                         | Rab          | Rab- visual            |
| GI_4502816-S | 117    | 124.7  | 113.9  | CHRM2   | <a href="#">NM_000739.1</a> | HM2                          | muscarini    | integral to muscarini  |
| GI_4502818-S | 174.2  | 201.2  | 166.5  | CHRM3   | <a href="#">NM_000740.1</a> | HM3                          | muscarini    | integral to phosphati  |
| GI_4502820-S | 95.8   | 96.2   | 89.7   | CHRM4   | <a href="#">NM_000741.1</a> | HM4                          | muscarini    | integral to acetyl     |
| GI_4502822-S | 106.7  | 114.2  | 107.4  | CHRNA2  | <a href="#">NM_000742.1</a> |                              | nicotinic    | nicotinic synaptic     |
| GI_4502832-S | 122.8  | 126.8  | 130.7  | CHRNB2  | <a href="#">NM_000748.1</a> | EFNL3                        | nicotinic    | nicotinic small        |
| GI_4502836-S | 116.4  | 119.9  | 117.5  | CHRNB4  | <a href="#">NM_000750.1</a> |                              | acetylcholi  | nicotinic synaptic     |
| GI_4502838-S | 286.8  | 318.3  | 217.2  | CHS1    | <a href="#">NM_000081.1</a> | CHS;LYST                     |              |                        |
| GI_4502844-S | 113.2  | 150.6  | 113.8  | CILP    | <a href="#">NM_003613.1</a> | HsT18872                     | phosphopr    | extracellul nucleobas  |
| GI_4502846-S | 3044.5 | 3277.1 | 2803.4 | CIRBP   | <a href="#">NM_001280.1</a> | CIRP                         | RNA          | nucleus response       |
| GI_4502848-S | 1041.6 | 1236   | 1421.2 | CKAP1   | <a href="#">NM_001281.1</a> | CG22;TCB;CKAPI               | chaperone    | microtubul microtubul  |
| GI_4502854-S | 199.6  | 246.9  | 215.9  | CKMT2   | <a href="#">NM_001825.1</a> | SMTCK                        | creatine     | mitochond muscle       |
| GI_4502856-S | 6230.7 | 4438.2 | 5814.7 | CKS1B   | <a href="#">NM_001826.1</a> | CKS1;ckshs1                  | cyclin-      | regulation             |
| GI_4502858-S | 1534.9 | 1586.8 | 1741.5 | CKS2    | <a href="#">NM_001827.1</a> | CKSHS2                       | cyclin-      | regulation             |
| GI_4502860-S | 3893.4 | 3740.2 | 2740.4 | AP3S1   | <a href="#">NM_001284.1</a> | CLAPS3;Sigma3A               | vesicle      | Golgi- insulin         |
| GI_4502864-S | 147.9  | 151.5  | 140.4  | CLCA1   | <a href="#">NM_001285.1</a> | CaCC                         | chloride     | integral to small      |
| GI_4502866-S | 505.8  | 616    | 551.8  | CLCN1   | <a href="#">NM_000083.1</a> | CLC1                         | voltage-     | integral to small      |
| GI_4502868-I | 489.3  | 501.6  | 480.5  | CLCN3   | <a href="#">NM_001829.1</a> | CLC3                         | voltage-     | integral to small      |
| GI_4502872-I | 110.8  | 131.8  | 116.6  | CLCN6   | <a href="#">NM_001286.1</a> | CLC-6;KIAA0046               | chloride     | membran small          |

|              |        |        |        |         |                             |                                      |              |             |              |
|--------------|--------|--------|--------|---------|-----------------------------|--------------------------------------|--------------|-------------|--------------|
| GI_4502882-I | 149.2  | 144.9  | 132.1  | CLK2    | <a href="#">NM_003993.1</a> |                                      | protein      | nucleus     | protein      |
| GI_4502884-I | 273.6  | 286.5  | 263.7  | CLK3    | <a href="#">NM_003992.1</a> |                                      | protein      | nucleus     | protein      |
| GI_4502888-S | 506.9  | 515.3  | 533.3  | CLN3    | <a href="#">NM_000086.1</a> | BTS                                  | chaperone    | mitochond   | protein      |
| GI_4502890-S | 3714.7 | 3728.4 | 3014.4 | CLNS1A  | <a href="#">NM_001293.1</a> | CLCI;ICln;CLNS1B                     | auxiliary    | plasma      | vision       |
| GI_4502892-S | 106.1  | 96.9   | 94.5   | CSRP3   | <a href="#">NM_003476.1</a> | CLP;MLP;CRP3;LMO4;CMD1M              |              | nucleus     | myogenes     |
| GI_4502896-S | 710.1  | 931.7  | 928.9  | CLPTM1  | <a href="#">NM_001294.1</a> |                                      |              | integral to | developm     |
| GI_4502898-A | 4518.9 | 4312.3 | 4117.3 | CLTA    | <a href="#">NM_001833.1</a> | LCA                                  | calcium      | coated pit  | intracellula |
| GI_4502902-A | 195.8  | 167.6  | 147.1  | CLTCL1  | <a href="#">NM_001835.1</a> | CLTD;CLH22;CLTCL                     | signal       | coated pit  | receptor     |
| GI_4502914-S | 95.1   | 98.6   | 92.6   | CNGA1   | <a href="#">NM_000087.1</a> | CNCG;CNG1;CNCG1;RCNC1;RCNCa;RCN      | ligand-      | integral to | vision       |
| GI_4502916-S | 97     | 98.8   | 92.4   | CNGA3   | <a href="#">NM_001298.1</a> | CNG3;ACHM2;CCNC1;CCNCa;CNCG3;CCN     | ligand-      | membran     | vision       |
| GI_4502918-S | 106.5  | 111.6  | 91.8   | CNGB1   | <a href="#">NM_001297.1</a> | GAR1;GARP;CNCG2;RCNC2;RCNCb;CNCG     | ligand-      | membran     | vision       |
| GI_4502922-S | 3836.2 | 5166   | 3235.4 | CNN3    | <a href="#">NM_001839.1</a> |                                      | tropomyos    | cellular_co | smooth       |
| GI_4502928-S | 80.2   | 95.6   | 88.4   | CNR2    | <a href="#">NM_001841.1</a> | CB2;CX5                              | cannabino    | integral to | G-protein    |
| GI_4502996-S | 388.6  | 522.8  | 468.5  | CPA1    | <a href="#">NM_001868.1</a> | CPA                                  | carboxype    |             | proteolysis  |
| GI_4502998-S | 94.2   | 102.4  | 93     | CPA2    | <a href="#">NM_001869.1</a> |                                      | carboxype    |             | vacuolar     |
| GI_4503000-S | 95     | 105.6  | 88.9   | CPA3    | <a href="#">NM_001870.1</a> |                                      | carboxype    | secretory   | proteolysis  |
| GI_4503002-S | 115.4  | 128.8  | 114.5  | CPB1    | <a href="#">NM_001871.1</a> | PASP;PCPB                            | carboxype    |             | proteolysis  |
| GI_4503008-S | 821.8  | 813.9  | 409.6  | CPE     | <a href="#">NM_001873.1</a> |                                      | carboxype    | peripheral  | neuropepti   |
| GI_4503010-S | 136.4  | 158.4  | 155.5  | CPN1    | <a href="#">NM_001308.1</a> | CPN;SCPN                             | metallocar   | extracellul | proteolysis  |
| GI_4503020-S | 117    | 131    | 119.3  | CPT1A   | <a href="#">NM_001876.1</a> | CPT1;CPT1-L;L-CPT1                   | carnitine    | integral to | fatty acid   |
| GI_4503022-S | 649.8  | 845.7  | 909.1  | CPT2    | <a href="#">NM_000098.1</a> | CPT1;CPTASE                          | acyltransf   | mitochond   | fatty acid   |
| GI_4503024-S | 106.9  | 188.9  | 108    | CPZ     | <a href="#">NM_003652.1</a> |                                      | metallocar   |             | proteolysis  |
| GI_4503036-S | 883.1  | 1211.8 | 1144.7 | CREG    | <a href="#">NM_003851.1</a> | CREG1                                | transcripti  |             | regulation   |
| GI_4503040-S | 139.9  | 134    | 110.2  | CRH     | <a href="#">NM_000756.1</a> | CRF                                  | hormone      | soluble     | learning     |
| GI_4503056-S | 106.2  | 109.2  | 93.8   | CRYAB   | <a href="#">NM_001885.1</a> | CRYA2;CTPP2                          | chaperone    | cytoplasm   | vision       |
| GI_4503058-S | 126    | 133.4  | 119.2  | CRYBA4  | <a href="#">NM_001886.1</a> |                                      | structural   |             | vision       |
| GI_4503062-S | 322    | 422.4  | 346.6  | CRYBB2  | <a href="#">NM_000496.1</a> | CCA2;CRYB2;CRYB2A;D22S665            | structural   |             | vision       |
| GI_4503064-S | 91.9   | 97.4   | 96.3   | CRYM    | <a href="#">NM_001888.1</a> | THBP;DFNA40                          | ornithine    |             | vision       |
| GI_4503068-I | 168.1  | 198.2  | 205.1  | MAPK14  | <a href="#">NM_001315.1</a> | RK;p38;EXIP;Mxi2;CSBP1;CSBP2;CSPB1;P | MAP          | cytoplasm   | chemotaxi    |
| GI_4503084-S | 137.3  | 191.1  | 158.7  | CSN1S1  | <a href="#">NM_001890.1</a> | CASA;CSN1                            |              |             | digestion    |
| GI_4503086-S | 180.5  | 199.1  | 167.8  | CSN2    | <a href="#">NM_001891.1</a> | CASB                                 | milk         |             | calcium      |
| GI_4503100-S | 473.1  | 576.8  | 606.8  | CSRP2   | <a href="#">NM_001321.1</a> | CRP2;LMO5                            | molecular    | nucleus     | muscle       |
| GI_4503118-S | 108.4  | 115.1  | 106.9  | CTAG1   | <a href="#">NM_001327.1</a> | CTAG;ESO1;LAGE2B;NY-ESO-1            | tumor        |             |              |
| GI_4503122-S | 15921  | 15377  | 6584.7 | CTGF    | <a href="#">NM_001901.1</a> | CCN2;NOV2;IGFBP8                     | insulin-like | extracellul | epidermal    |
| GI_4503126-S | 476.8  | 664.9  | 732.3  | CTNNA1  | <a href="#">NM_001903.1</a> | CAP102                               | cell         | cytoskelet  | cell         |
| GI_4503128-S | 2240.7 | 2443.2 | 1755.7 | CTNNAL1 | <a href="#">NM_003798.1</a> | CLLP;alpha-CATU                      |              |             | apoptosis    |
| GI_4503132-S | 804.4  | 658.5  | 722.2  | CTPS    | <a href="#">NM_001905.1</a> |                                      | CTP          |             | drug         |
| GI_4503134-S | 121.6  | 126.8  | 108.7  | CTRB1   | <a href="#">NM_001906.1</a> | CTRB                                 | trypsin      | extracellul | proteolysis  |
| GI_4503136-S | 112.2  | 133    | 115.3  | CTRL    | <a href="#">NM_001907.1</a> | CTRL1                                |              | extracellul | proteolysis  |
| GI_4503164-S | 118.5  | 118.2  | 114.3  | CUL3    | <a href="#">NM_003590.1</a> |                                      |              |             |              |
| GI_4503174-S | 192.9  | 159.6  | 153.3  | CXCR4   | <a href="#">NM_003467.1</a> | HM89;LAP3;NPYR;WHIM;LESTR;NPY3R;fus  | chemokin     | cytoplasm   | activation   |
| GI_4503176-S | 166.7  | 210.7  | 183    | CXorf2  | <a href="#">NM_001586.1</a> | TEX28                                | molecular    | integral to | biological_  |
| GI_4503178-S | 148.2  | 134.6  | 129.8  | OFD1    | <a href="#">NM_003611.1</a> | 71-7A;CXORF5                         | molecular    | kinesin     | biological_  |
| GI_4503180-S | 1574.3 | 2190   | 2414.5 | CXX1    | <a href="#">NM_003928.1</a> |                                      | molecular    | membran     | biological_  |

|              |        |        |        |         |                             |                                 |             |             |             |
|--------------|--------|--------|--------|---------|-----------------------------|---------------------------------|-------------|-------------|-------------|
| GI_4503182-S | 376.3  | 399.1  | 374.6  | CYB5    | <a href="#">NM_001914.1</a> |                                 | cytochrom   | microsom    | energy      |
| GI_4503188-S | 266.9  | 323.4  | 265.6  | CYP11A1 | <a href="#">NM_000781.1</a> | CYP11A;P450SCC                  | cytochrom   | membran     | androgen    |
| GI_4503218-S | 132    | 149.6  | 137.2  | CYP2C19 | <a href="#">NM_000769.1</a> | CPCJ;CYP2C;P450C2C;P450IIC19    | monooxyg    | microsom    | electron    |
| GI_4503240-S | 218.3  | 239.1  | 216.9  | CYP4F3  | <a href="#">NM_000896.1</a> | CPF3;CYP4F;LTB4H                | monooxyg    | membran     | leukotrien  |
| GI_4503250-S | 1244.1 | 772.6  | 752.6  | DAB2    | <a href="#">NM_001343.1</a> | DOC2;DOC-2                      | tumor       | nucleus     | cell        |
| GI_4503252-S | 5558.5 | 5588.8 | 4210   | DAD1    | <a href="#">NM_001344.1</a> |                                 | apoptosis   | microsom    | anti-       |
| GI_4503264-S | 562.6  | 574.2  | 642.4  | DBT     | <a href="#">NM_001918.1</a> | MSUD2;BCATE2                    | acyltransf  | alpha-      | metabolis   |
| GI_4503266-S | 1522.9 | 923.4  | 1051.1 | DCI     | <a href="#">NM_001919.1</a> |                                 | dodeceno    | mitochond   | fatty acid  |
| GI_4503268-S | 596.9  | 638    | 690.2  | DCK     | <a href="#">NM_000788.1</a> |                                 | deoxycytid  | nucleus     | pyrimidine  |
| GI_4503276-S | 1026   | 1112.9 | 939.3  | DCTD    | <a href="#">NM_001921.1</a> |                                 | dCMP        |             | pyrimidine  |
| GI_4503280-S | 152.5  | 197.1  | 156.1  | DDC     | <a href="#">NM_000790.1</a> | AADC                            | aromatic-L- |             | catechola   |
| GI_4503298-S | 2891   | 3945.2 | 5273.7 | BHLHB2  | <a href="#">NM_003670.1</a> | DEC1;Stra14                     | transcripti | nucleus     | regulation  |
| GI_4503300-S | 2496.2 | 2990.6 | 3124.1 | DECR1   | <a href="#">NM_001359.1</a> | DECR;NADPH                      | 2,4-        | mitochond   | metabolis   |
| GI_4503302-S | 99.1   | 107.1  | 99.2   | DEFA4   | <a href="#">NM_001925.1</a> | HP4;DEF4;HP-4;HNP-4             | calcium     | extracellul | xenobiotic  |
| GI_4503312-S | 103.2  | 104.4  | 98.1   | DGKE    | <a href="#">NM_003647.1</a> | DGK;DAGK6                       | diacylglyc  |             | phospholi   |
| GI_4503314-S | 155.4  | 199.7  | 182    | DGKG    | <a href="#">NM_001346.1</a> | DAGK3;DGK-GAMMA                 | diacylglyc  |             | signal      |
| GI_4503320-S | 1194   | 1355   | 1238.8 | DHCR7   | <a href="#">NM_001360.1</a> | SLOS                            | cholestero  | integral to | cholestero  |
| GI_4503334-S | 106.8  | 107.5  | 117.4  | DIO3    | <a href="#">NM_001362.1</a> | D3;5DIII;TXDI3;DIOIII           | thyroxine   | cellular_co | biological_ |
| GI_4503348-S | 355.4  | 588.6  | 384.5  | DNASE2  | <a href="#">NM_001375.1</a> | DNL;DNL2                        | deoxyribo   | lysosome    | DNA         |
| GI_4503350-S | 4172.2 | 3690.5 | 3819.8 | DNMT1   | <a href="#">NM_001379.1</a> | DNMT;MCMT;CXXC9                 | DNA         | nucleus     | DNA         |
| GI_4503352-S | 103.7  | 116.6  | 101    | DOC2A   | <a href="#">NM_003586.1</a> |                                 | binding     | secretory   | synaptic    |
| GI_4503354-S | 558.5  | 506.5  | 693.9  | DOCK1   | <a href="#">NM_001380.1</a> | DOCK180                         | GTPase      | cytoplasm   | small       |
| GI_4503360-S | 150.6  | 163.4  | 153.8  | DPH2L1  | <a href="#">NM_001383.1</a> | DPH2L;OVCA1                     |             |             | protein     |
| GI_4503362-S | 2781.7 | 3180   | 2742.6 | DPM1    | <a href="#">NM_003859.1</a> | MPDS                            | dolichyl-   | endoplas    | protein     |
| GI_4503374-S | 140    | 154.5  | 119.9  | DPYS    | <a href="#">NM_001385.1</a> | DHP;DHPase                      | dihydropyr  |             | response    |
| GI_4503392-S | 108.4  | 106.2  | 106.6  | DRP2    | <a href="#">NM_001939.1</a> |                                 | structural  | cytoskelet  | central     |
| GI_4503400-S | 94.2   | 95.8   | 87.9   | DSG1    | <a href="#">NM_001942.1</a> | DG1;DSG;CDHF4                   | cell        | cytoskelet  | cell        |
| GI_4503402-S | 376.4  | 454.2  | 363.2  | DSG2    | <a href="#">NM_001943.1</a> | HDGC;CDHF5                      | cell        | cytoskelet  | homophili   |
| GI_4503404-S | 94.4   | 112    | 99     | DSG3    | <a href="#">NM_001944.1</a> | PVA;CDHF6                       | cell        | cytoskelet  | homophili   |
| GI_4503412-S | 1380.6 | 955.1  | 1189.4 | DTR     | <a href="#">NM_001945.1</a> | DTS;HBEGF;HEGFL                 | epidermal   | extracellul | positive    |
| GI_4503414-S | 1001.5 | 1062.5 | 921.1  | DUSP11  | <a href="#">NM_003584.1</a> | PIR1                            | RNA         | nucleus     | RNA         |
| GI_4503420-S | 155.9  | 198.2  | 169.1  | DUSP9   | <a href="#">NM_001395.1</a> | MKP4;MKP-4                      | protein     | cytoplasm   | JNK         |
| GI_4503428-S | 903.4  | 841.8  | 720.3  | DYRK3   | <a href="#">NM_003582.1</a> |                                 | protein     |             | protein     |
| GI_4503442-S | 199.9  | 249.5  | 353.1  | ECE1    | <a href="#">NM_001397.1</a> | ECE                             | metalloen   | integral to | cell-cell   |
| GI_4503446-S | 2423   | 2819.3 | 2440   | ECH1    | <a href="#">NM_001398.1</a> | HPXEL                           | enoyl-CoA   | peroxisom   | fatty acid  |
| GI_4503458-S | 105.3  | 115.4  | 123.3  | EDG6    | <a href="#">NM_003775.1</a> | LPC1;SLP4                       | lipid       | integral to | cytosolic   |
| GI_4503464-S | 616    | 668.6  | 361.9  | EDNRA   | <a href="#">NM_001957.1</a> | ETA;ETRA                        | endothelin  | integral to | phosphati   |
| GI_4503466-A | 420.8  | 525.5  | 475.2  | EDNRB   | <a href="#">NM_003991.1</a> | ETB;ETRB;HSCR;ABCDS;HSCR2       | endothelin  | integral to | negative    |
| GI_4503466-I | 87.6   | 101.6  | 99.7   | EDNRB   | <a href="#">NM_003991.1</a> | ETB;ETRB;HSCR;ABCDS;HSCR2       | endothelin  | integral to | negative    |
| GI_4503468-S | 116.1  | 139.3  | 124.8  | EEA1    | <a href="#">NM_003566.1</a> | ZFYVE2                          | phosphati   | peripheral  | nonselecti  |
| GI_4503486-S | 111.2  | 119.6  | 113.9  | EFNA5   | <a href="#">NM_001962.1</a> | AF1;EFL5;RAGS;EPLG7;LERK7       | GPI-linked  | membran     | neurogene   |
| GI_4503494-S | 93.9   | 87.8   | 91.6   | EGR4    | <a href="#">NM_001965.1</a> | NGFIC;NGFI-C;PAT133             | DNA         | nucleus     | positive    |
| GI_4503496-S | 109.8  | 126    | 133.8  | EHHADH  | <a href="#">NM_001966.1</a> | LBP;LBFP;PBFE                   | 3-          | peroxisom   | energy      |
| GI_4503502-S | 1991.1 | 2425   | 2105.5 | EIF2B1  | <a href="#">NM_001414.1</a> | EIF2B;EIF-2B;EIF2BA;EIF-2Balpha | translation | eukaryotic  | translation |

|              |         |        |        |          |                             |                                          |             |             |             |
|--------------|---------|--------|--------|----------|-----------------------------|------------------------------------------|-------------|-------------|-------------|
| GI_4503508-S | 2508    | 2386.7 | 2262.4 | EIF3S10  | <a href="#">NM_003750.1</a> | P167;EIF3A;KIAA0139;eIF3-p170;eIF3-theta | translation | eukaryotic  | regulation  |
| GI_4503510-S | 490.5   | 574.1  | 323.1  | EIF3S1   | <a href="#">NM_003758.1</a> | eIF3-p35;eIF3-alpha                      | translation | eukaryotic  | regulation  |
| GI_4503512-S | 2931.3  | 3456.9 | 3208.6 | EIF3S2   | <a href="#">NM_003757.1</a> | TRIP1;TRIP-1;eIF3-p36;eIF3-beta          | translation | eukaryotic  | regulation  |
| GI_4503514-S | 4976.4  | 5223.8 | 3715.5 | EIF3S3   | <a href="#">NM_003756.1</a> | eIF3-p40;eIF3-gamma                      | translation | eukaryotic  | regulation  |
| GI_4503516-S | 6903.7  | 6758.4 | 6727.6 | EIF3S4   | <a href="#">NM_003755.1</a> | EIF3-P42;eIF3-p44;eIF3-delta             | translation |             | regulation  |
| GI_4503518-S | 8993.5  | 8230.7 | 6642.2 | EIF3S5   | <a href="#">NM_003754.1</a> | eIF3-p47                                 | translation | eukaryotic  | regulation  |
| GI_4503520-S | 10070.4 | 9241.3 | 7786.5 | EIF3S6   | <a href="#">NM_001568.1</a> | INT6;eIF3e;EIF3-P48;eIF3-p46             | translation | eukaryotic  | cell growth |
| GI_4503528-S | 10777   | 11072  | 10089  | EIF4A1   | <a href="#">NM_001416.1</a> | DDX2A;EIF4A;EIF-4A                       | helicase    | eukaryotic  | binding to  |
| GI_4503532-S | 936.5   | 912.1  | 664.4  | EIF4B    | <a href="#">NM_001417.1</a> | EIF-4B                                   | translation | eukaryotic  | regulation  |
| GI_4503534-S | 579.4   | 721.7  | 606.5  | EIF4E    | <a href="#">NM_001968.1</a> | EIF-4E;EIF4EL1                           | mRNA        | cytoplasm   | binding to  |
| GI_4503536-S | 254     | 316.6  | 302.6  | EIF4EBP3 | <a href="#">NM_003732.1</a> | 4E-BP3                                   |             |             |             |
| GI_4503538-S | 7131.8  | 7441.5 | 6485.6 | EIF4G2   | <a href="#">NM_001418.1</a> | p97;DAP5;NAT1                            | translation | eukaryotic  | cell cycle  |
| GI_4503548-S | 227.2   | 274.1  | 264.6  | ELA2     | <a href="#">NM_001972.1</a> | NE                                       | macrophage  |             | proteolysis |
| GI_4503554-S | 575.3   | 392.6  | 524.4  | ELF4     | <a href="#">NM_001421.1</a> | MEF;ELFR                                 | transcripti |             | transcripti |
| GI_4503558-S | 1330.1  | 956.5  | 1023.2 | EMP1     | <a href="#">NM_001423.1</a> | TMP;CL-20                                |             | integral to | epidermal   |
| GI_4503562-S | 3365.9  | 2788.3 | 3369.8 | EMP3     | <a href="#">NM_001425.1</a> | YMP                                      |             | integral to | negative    |
| GI_4503578-S | 600     | 395.8  | 439.4  | EPB41L2  | <a href="#">NM_001431.1</a> | 4.1-G                                    | structural  | spectrin    | cell shape  |
| GI_4503580-S | 439.3   | 530.7  | 479.2  | EPB49    | <a href="#">NM_001978.1</a> | DMT;DEMATIN                              | actin       | actin       | cell shape  |
| GI_4503588-S | 110.3   | 114.5  | 112.3  | EPO      | <a href="#">NM_000799.1</a> | EP                                       | erythropoi  | extracellul | response    |
| GI_4503592-S | 673.6   | 658.1  | 545    | EPS15    | <a href="#">NM_001981.1</a> | AF1P;AF-1P;MLLT5                         | calcium     |             | EGF         |
| GI_4503594-S | 105.6   | 95.1   | 87.7   | EPX      | <a href="#">NM_000502.1</a> | EPO;EPP;EPX-PEN                          | peroxidase  |             | peroxidase  |
| GI_4503596-S | 277.2   | 331.6  | 314.9  | ERBB3    | <a href="#">NM_001982.1</a> | HER3                                     | transmem    | integral to | protein     |
| GI_4503600-S | 677.3   | 876.3  | 888.8  | ERCC5    | <a href="#">NM_000123.1</a> | XPG;UVDR;XPGC;ERCCM2                     | endodeox    | nucleus     | nucleotide- |
| GI_4503602-S | 105     | 116    | 95.3   | ESR1     | <a href="#">NM_000125.1</a> | ER;ESR;Era;ESRA;NR3A1                    | steroid     | membran     | transcripti |
| GI_4503606-S | 2904    | 3139   | 2671.4 | ETFA     | <a href="#">NM_000126.1</a> | EMA;GA2;MADD                             | electron    | mitochond   | electron    |
| GI_4503608-S | 1173.5  | 1470   | 1326.9 | ETFB     | <a href="#">NM_001985.1</a> | MADD                                     | electron    | mitochond   | electron    |
| GI_4503612-S | 313.9   | 409.8  | 347.1  | EVPL     | <a href="#">NM_001988.1</a> | EVPK                                     | structural  | plasmode    | epidermal   |
| GI_4503638-S | 523.7   | 554.7  | 475.6  | F2RL3    | <a href="#">NM_003950.1</a> | PAR4                                     | thrombin    | integral to | G-protein   |
| GI_4503650-S | 527     | 361    | 580.3  | ACSL1    | <a href="#">NM_001995.1</a> | ACS1;LACS;FACL1;FACL2;LACS1;LACS2        | long-chain- |             | fatty acid  |
| GI_4503654-S | 272.6   | 299.7  | 280    | FANCA    | <a href="#">NM_000135.1</a> | FA;FA1;FAA;FAH;FA-H;FACA;FANCH           |             | cytoplasm   | DNA         |
| GI_4503656-S | 110.9   | 117.7  | 102.1  | FOXH1    | <a href="#">NM_003923.1</a> | FAST1;FAST-1                             | transcripti | nucleus     | signal      |
| GI_4503664-S | 185.1   | 160.4  | 130    | FBLN2    | <a href="#">NM_001998.1</a> |                                          | extracellul | extracellul |             |
| GI_4503680-S | 264.9   | 254.4  | 207.1  | FCGBP    | <a href="#">NM_003890.1</a> | FC(GAMMA)BP                              | protein     |             | immune      |
| GI_4503690-S | 128.6   | 130.8  | 128.4  | FGF16    | <a href="#">NM_003868.1</a> |                                          | growth      | extracellul | response    |
| GI_4503692-S | 131.2   | 141.9  | 123.2  | FGF17    | <a href="#">NM_003867.1</a> | FGF-13                                   | growth      | extracellul | signal      |
| GI_4503694-I | 135.9   | 151.1  | 159.5  | FGF18    | <a href="#">NM_003862.1</a> | ZFGF5;FGF-18                             | growth      | extracellul | positive    |
| GI_4503700-S | 90.8    | 99.5   | 84.8   | FGF4     | <a href="#">NM_002007.1</a> | HST;KFGF;HST-1;HSTF1;K-FGF;HBGF-4        | growth      | extracellul | positive    |
| GI_4503706-S | 91.5    | 105.9  | 86.5   | FGF9     | <a href="#">NM_002010.1</a> | GAF;HBFG-9                               | growth      | extracellul | signal      |
| GI_4503718-S | 171     | 195.2  | 186.4  | FHIT     | <a href="#">NM_002012.1</a> | FRA3B;AP3Aase                            | catalytic   |             | nucleotide  |
| GI_4503732-S | 91      | 104.2  | 112.4  | FOXF1    | <a href="#">NM_001451.1</a> | FKHL5;FREAC1                             | protein     | transcripti | regulation  |
| GI_4503734-S | 448.1   | 486.6  | 684.9  | FOXC1    | <a href="#">NM_001453.1</a> | ARA;IGDA;IHG1;FKHL7;IRID1;FREAC3         | DNA         | nucleus     | vision      |
| GI_4503744-S | 23904.3 | 24993  | 21057  | FLNA     | <a href="#">NM_001456.1</a> | FLN;FMD;MNS;ABPX;FLN1;NHBP;OPD1;OP       | actin       | actin       | actin       |
| GI_4503746-S | 2949.3  | 2787.5 | 2957.5 | FLNB     | <a href="#">NM_001457.1</a> | FH1;TAP;TABP;FLN1L;ABP-278               | membran     | actin       | actin       |
| GI_4503752-A | 106.2   | 101.2  | 95.5   | FLT4     | <a href="#">NM_002020.1</a> | PCL;VEGFR3                               | vascular    | integral to | transmem    |

|              |        |        |        |        |                             |                                    |             |             |              |
|--------------|--------|--------|--------|--------|-----------------------------|------------------------------------|-------------|-------------|--------------|
| GI_4503752-I | 722    | 822.7  | 887.1  | FLT4   | <a href="#">NM_002020.1</a> | PCL;VEGFR3                         | vascular    | integral to | transmem     |
| GI_4503754-S | 260    | 380.3  | 295.2  | FMO1   | <a href="#">NM_002021.1</a> |                                    | monooxyg    | microsom    | electron     |
| GI_4503756-S | 88.8   | 91.8   | 79.3   | FMO2   | <a href="#">NM_001460.1</a> |                                    | monooxyg    | microsom    | electron     |
| GI_4503758-S | 308.9  | 379.2  | 362.1  | FMO4   | <a href="#">NM_002022.1</a> | FMO2                               | dimethyla   | microsom    | xenobiotic   |
| GI_4503760-S | 128.8  | 163    | 137.6  | FMO5   | <a href="#">NM_001461.1</a> |                                    | dimethyla   | microsom    | electron     |
| GI_4503764-S | 348.7  | 459.7  | 448.4  | FMR1   | <a href="#">NM_002024.1</a> | FMRP;FRAXA                         | mRNA        | polysome    |              |
| GI_4503766-S | 108.9  | 94.7   | 92     | FMR2   | <a href="#">NM_002025.1</a> | MRX2;OX19;FRAXE                    |             |             | brain        |
| GI_4503768-S | 128.9  | 140.2  | 130.5  | NPFF   | <a href="#">NM_003717.1</a> | FMRFAL                             | receptor    | soluble     | neuropepti   |
| GI_4503770-S | 3275.9 | 2530.1 | 1967.2 | FNTA   | <a href="#">NM_002027.1</a> | FPTA;PGGT1A                        | protein     | cytoplasm   | C-terminal   |
| GI_4503776-S | 85.3   | 91.6   | 87.2   | FPGT   | <a href="#">NM_003838.1</a> | GFPP                               | catalytic   | cytoplasm   | fucose       |
| GI_4503780-S | 114.9  | 122.9  | 111.4  | FPRL1  | <a href="#">NM_001462.1</a> | ALXR;HM63;FMLPX;FPR2A;FPRH1;FPRH2; | N-formyl    | integral to | chemotaxi    |
| GI_4503790-S | 98.7   | 97.3   | 94.7   | FSHB   | <a href="#">NM_000510.1</a> |                                    | hormone     | soluble     | female       |
| GI_4503794-S | 4554   | 4522.4 | 3579.4 | FTH1   | <a href="#">NM_002032.1</a> | FTH;FTHL6                          | iron ion    | ferritin    | intracellula |
| GI_4503804-S | 277.8  | 223.9  | 180.3  | FUT1   | <a href="#">NM_000148.1</a> | H;HH                               | blood       | Golgi       | carbohydr    |
| GI_4503806-S | 104    | 119.3  | 106.4  | FUT2   | <a href="#">NM_000511.1</a> | SE                                 | fucosyltra  | membran     | carbohydr    |
| GI_4503808-S | 105.1  | 122.7  | 109.7  | FUT3   | <a href="#">NM_000149.1</a> | LE;Les                             | fucosyltra  | Golgi       | carbohydr    |
| GI_4503810-S | 238.1  | 198.2  | 226.7  | FUT4   | <a href="#">NM_002033.1</a> | FCT3A;FUC-TIV                      | fucosyltra  | Golgi       | carbohydr    |
| GI_4503812-S | 120.3  | 125    | 111.5  | FUT5   | <a href="#">NM_002034.1</a> | FUC-TV                             | fucosyltra  | Golgi       | carbohydr    |
| GI_4503814-S | 769.2  | 917.6  | 935.5  | FUT6   | <a href="#">NM_000150.1</a> |                                    | fucosyltra  | Golgi       | protein      |
| GI_4503816-S | 829.5  | 716.2  | 845.7  | FVT1   | <a href="#">NM_002035.1</a> |                                    | oxidoredu   | extracellul | oncogene     |
| GI_4503824-S | 237    | 213    | 365.1  | FZD1   | <a href="#">NM_003505.1</a> |                                    | transmem    | integral to | G-protein    |
| GI_4503832-S | 129.3  | 240.6  | 227.1  | FZD7   | <a href="#">NM_003507.1</a> | FzE3                               | frizzled    | integral to | frizzled     |
| GI_4503834-S | 97.3   | 169.2  | 172.6  | FZD9   | <a href="#">NM_003508.1</a> | FZD3                               | frizzled    | integral to | frizzled     |
| GI_4503850-S | 133    | 153.5  | 149.7  | GAB1   | <a href="#">NM_002039.1</a> |                                    | SH3/SH2     |             | insulin      |
| GI_4503864-A | 107.9  | 134.7  | 112.5  | GABRB2 | <a href="#">NM_000813.1</a> |                                    | GABA-A      | integral to | gamma-       |
| GI_4503870-S | 125.5  | 125.2  | 114.3  | GABRR2 | <a href="#">NM_002043.1</a> |                                    | GABA-A      | integral to | small        |
| GI_4503872-I | 98.4   | 86.5   | 95.2   | GAD1   | <a href="#">NM_000817.1</a> | GAD;GAD25;GAD67                    |             |             | glutamate    |
| GI_4503874-S | 87.4   | 84.6   | 84.5   | GAD2   | <a href="#">NM_000818.1</a> | GAD65                              |             |             | glutamate    |
| GI_4503876-S | 257.3  | 111.1  | 104.5  | GAGE1  | <a href="#">NM_001468.1</a> |                                    | tumor       |             | cellular     |
| GI_4503878-S | 7016.8 | 2546.7 | 2514.3 | GAGE2  | <a href="#">NM_001472.1</a> |                                    | molecular   | cellular_co | biological_  |
| GI_4503882-S | 6913.5 | 2476   | 2327.6 | GAGE4  | <a href="#">NM_001474.1</a> |                                    | tumor       |             |              |
| GI_4503884-S | 2175   | 1423.8 | 1398.9 | GAGE5  | <a href="#">NM_001475.1</a> |                                    | tumor       |             |              |
| GI_4503886-S | 9712.8 | 3751.3 | 3211.4 | GAGE6  | <a href="#">NM_001476.1</a> |                                    | tumor       |             |              |
| GI_4503888-S | 6691.1 | 2396.7 | 2356.7 | GAGE7B | <a href="#">NM_001477.1</a> |                                    | molecular   | cellular_co | biological_  |
| GI_4503894-S | 2536.7 | 2267.8 | 2930   | GALK1  | <a href="#">NM_000154.1</a> | GK1;GALK                           | galactokin  | cytoplasm   | galactose    |
| GI_4503896-S | 450.3  | 512.4  | 496.7  | GALK2  | <a href="#">NM_002044.1</a> | GK2                                | galactokin  | cytoplasm   | carbohydr    |
| GI_4503906-S | 182.5  | 200    | 166.9  | GALR3  | <a href="#">NM_003614.1</a> |                                    | galanin     | integral to | negative     |
| GI_4503916-S | 389.8  | 385.4  | 279.4  | GAS8   | <a href="#">NM_001481.1</a> | GAS11                              | molecular   | kinesin     | negative     |
| GI_4503918-S | 100.6  | 156.3  | 140.7  | GAS1   | <a href="#">NM_002048.1</a> |                                    | molecular   | integral to | cell cycle   |
| GI_4503928-S | 389.6  | 488.4  | 550.4  | GATA3  | <a href="#">NM_002051.1</a> | HDR;MGC5445                        | transcripti |             | embryoge     |
| GI_4503932-S | 106.5  | 116.8  | 120.3  | GATM   | <a href="#">NM_001482.1</a> | AGAT                               | glycine     | cytosol     | creatine     |
| GI_4503934-S | 319.9  | 395.5  | 521.1  | GBA    | <a href="#">NM_000157.1</a> | GBA1;GLUC                          |             | lysosome    |              |
| GI_4503936-S | 1593.1 | 1630.2 | 1323.6 | GBAS   | <a href="#">NM_001483.1</a> | NIPSNAP2                           | folic acid  | membran     | metabolis    |
| GI_4503938-S | 190.6  | 227.9  | 133.1  | GBP1   | <a href="#">NM_002053.1</a> |                                    | GTP         |             | immune       |



|              |        |        |        |           |                             |                                  |             |             |              |
|--------------|--------|--------|--------|-----------|-----------------------------|----------------------------------|-------------|-------------|--------------|
| GI_4503942-I | 237.7  | 269.8  | 276.9  | GCDH      | <a href="#">NM_000159.1</a> | ACAD5                            | glutaryl-   | mitochond   | electron     |
| GI_4503946-S | 149.5  | 174.1  | 160.9  | GCGR      | <a href="#">NM_000160.1</a> | GGR                              | glucagon    | integral to | regulation   |
| GI_4503948-S | 243.1  | 316.3  | 336.5  | GCH1      | <a href="#">NM_000161.1</a> | GCH;DYT5;GTPCH1                  | GTP         |             | nitric oxide |
| GI_4503954-S | 1658.8 | 1685.2 | 1938.4 | GCN5L1    | <a href="#">NM_001487.1</a> |                                  | molecular   | cellular_co | biological_  |
| GI_4503964-S | 163.3  | 195.3  | 165.5  | OPN1MW    | <a href="#">NM_000513.1</a> | CBD;DCB;GCP;CBBM                 | green-      | integral to | vision       |
| GI_4503970-S | 584.4  | 592.8  | 688.9  | GDI1      | <a href="#">NM_001493.1</a> | GDIL;MRX41;MRX48;OPHN2;XAP-      | GDP-        |             | nonselecti   |
| GI_4503976-S | 138.7  | 149.3  | 124    | GENX-3414 | <a href="#">NM_003943.1</a> | GENEX3414                        | catalytic   | membran     | muscle       |
| GI_4503980-S | 486.9  | 513.6  | 419.1  | GFPT1     | <a href="#">NM_002056.1</a> | GFA;GFAT;GFPT;GFAT1              | glutamine-  | cytoplasm   | energy       |
| GI_4503986-S | 1100.1 | 1334.1 | 1127.1 | GGH       | <a href="#">NM_003878.1</a> | GH                               | exopeptid   | lysosome    |              |
| GI_4503992-S | 174.6  | 167.8  | 160    | GHR       | <a href="#">NM_000163.1</a> |                                  | growth      | integral to | growth       |
| GI_4503996-S | 342.5  | 424.7  | 367.9  | GHRHR     | <a href="#">NM_000823.1</a> | GHRFR                            | G-protein   | integral to | adenylate    |
| GI_4504002-S | 124.3  | 141.6  | 139.6  | GJA4      | <a href="#">NM_002060.1</a> | CX37                             | connexon    | gap         | intercellula |
| GI_4504008-S | 609.9  | 969.4  | 746.3  | GLA       | <a href="#">NM_000169.1</a> | GALA                             | hydrolase   | lysosome    | carbohydr    |
| GI_4504010-S | 353    | 741    | 423    | GCLM      | <a href="#">NM_002061.1</a> | GLCLR                            | glutamate-  |             | cysteine     |
| GI_4504012-S | 152.3  | 136.1  | 114.8  | GLDC      | <a href="#">NM_000170.1</a> | GCE;NKH;GCSP;HYGN1               | glycine     | mitochond   | glycine      |
| GI_4504018-S | 246.8  | 302.9  | 271.4  | GLRA1     | <a href="#">NM_000171.1</a> | STHE                             | glycine-    | integral to | small        |
| GI_4504024-S | 202.6  | 260.6  | 228.4  | GLRX      | <a href="#">NM_002064.1</a> | GRX                              | glutaredox  |             | electron     |
| GI_4504032-S | 132.7  | 137.6  | 127.1  | GML       | <a href="#">NM_002066.1</a> | LY6DL                            | GPI-        | plasma      | DNA          |
| GI_4504034-S | 3492.7 | 3116   | 3175.7 | GMPS      | <a href="#">NM_003875.1</a> |                                  | GMP         |             | purine       |
| GI_4504036-S | 3788.3 | 4470.4 | 4619.8 | GNA11     | <a href="#">NM_002067.1</a> | GNA-11                           | heterotrim  | peripheral  | signal       |
| GI_4504038-S | 204.7  | 225.5  | 215.4  | GNA15     | <a href="#">NM_002068.1</a> | GNA16                            | heterotrim  | peripheral  | phospholi    |
| GI_4504040-S | 2285.3 | 3006.2 | 2879.5 | GNAI2     | <a href="#">NM_002070.1</a> | GIP;GNAI2B                       | heterotrim  | peripheral  | negative     |
| GI_4504042-A | 184.6  | 213.8  | 192.7  | GNAL      | <a href="#">NM_002071.1</a> |                                  | heterotrim  | peripheral  | signal       |
| GI_4504042-I | 97.8   | 87.2   | 97.1   | GNAL      | <a href="#">NM_002071.1</a> |                                  | heterotrim  | peripheral  | signal       |
| GI_4504058-S | 154.8  | 190    | 169    | GNRHR     | <a href="#">NM_000406.1</a> | GRHR;LHRHR                       | gonadotro   | integral to | G-protein    |
| GI_4504066-S | 4322.7 | 2157.9 | 1933.5 | GOT1      | <a href="#">NM_002079.1</a> |                                  | aspartate   | cytosol     | aspartate    |
| GI_4504068-S | 2676.4 | 3361.1 | 3441.8 | GOT2      | <a href="#">NM_002080.1</a> |                                  | aspartate   | mitochond   | aspartate    |
| GI_4504074-S | 131.2  | 136.6  | 135.8  | GP2       | <a href="#">NM_001502.1</a> | ZAP75                            |             | secretory   |              |
| GI_4504076-S | 128.8  | 131.8  | 124.8  | GP9       | <a href="#">NM_000174.1</a> | CD42a                            | cell        | integral to | blood        |
| GI_4504080-S | 448    | 549.4  | 570.3  | GPC1      | <a href="#">NM_002081.1</a> |                                  | glypican    | proteoglyc  | developm     |
| GI_4504084-S | 172    | 224.2  | 209.8  | GPD2      | <a href="#">NM_000408.1</a> | GDH2                             | glycerol-3- | glycerol-3- | glucose      |
| GI_4504090-S | 135.7  | 137.7  | 116.2  | GPR30     | <a href="#">NM_001505.1</a> | FEG-1;CMKRL2;GPCR-Br             | G-protein   | integral to | G-protein    |
| GI_4504092-S | 154.3  | 186.7  | 174.2  | GPR32     | <a href="#">NM_001506.1</a> |                                  | G-protein   | integral to | G-protein    |
| GI_4504094-S | 93.3   | 101.1  | 93.7   | GPR38     | <a href="#">NM_001507.1</a> | MTLR1                            | G-protein   | integral to | G-protein    |
| GI_4504096-S | 130.1  | 128.8  | 143    | GPR39     | <a href="#">NM_001508.1</a> |                                  | G-protein   | integral to | G-protein    |
| GI_4504098-S | 111.1  | 125.8  | 108.5  | CXCR3     | <a href="#">NM_001504.1</a> | GPR9;IP10;MigR;CD183;Mig-R;CKR-  | chemokin    | cytoplasm   | cytosolic    |
| GI_4504100-S | 125.2  | 142.2  | 129.2  | GRK6      | <a href="#">NM_002082.1</a> | GPRK6                            | G-protein-  |             | regulation   |
| GI_4504106-S | 4546.7 | 4431.4 | 4622.5 | GPX4      | <a href="#">NM_002085.1</a> | snGPx                            | glutathion  | mitochond   | phospholi    |
| GI_4504130-S | 92.2   | 110.9  | 100.7  | GRIN2D    | <a href="#">NM_000836.1</a> | EB11;NMDAR2D                     | N-methyl-   | integral to | signal       |
| GI_4504132-S | 765.7  | 992.5  | 463.9  | NR3C1     | <a href="#">NM_000176.1</a> | GR;GCR;GRL                       | glucocorti  | mitochond   | transcripti  |
| GI_4504136-S | 215    | 229.1  | 217.3  | GRM2      | <a href="#">NM_000839.1</a> | GLUR2;mGlu2;GPRC1B;MGLUR2        | metabotro   | integral to | negative     |
| GI_4504138-S | 80.8   | 93.1   | 83.4   | GRM3      | <a href="#">NM_000840.1</a> | GLUR3;mGlu3;GPRC1C;MGLUR3        | metabotro   | integral to | negative     |
| GI_4504140-S | 734.3  | 931.8  | 792.4  | GRM4      | <a href="#">NM_000841.1</a> | mGlu4;GPRC1D;MGLUR4              | metabotro   | integral to | negative     |
| GI_4504142-S | 93.6   | 102.3  | 78.8   | GRM5      | <a href="#">NM_000842.1</a> | mGlu5;GPRC1E;MGLUR5;MGLUR5A;MGLU | metabotro   | integral to | metabotro    |

|              |         |        |                |                             |                                    |             |             |              |
|--------------|---------|--------|----------------|-----------------------------|------------------------------------|-------------|-------------|--------------|
| GI_4504148-S | 105.5   | 100.3  | 94 GRM8        | <a href="#">NM_000845.1</a> | GLUR8;mGlu8;GPRC1H;MGLUR8          | metabotro   | integral to | negative     |
| GI_4504150-S | 6195.8  | 5146.6 | 4838 GRN       | <a href="#">NM_002087.1</a> | PEPI;PCDGF                         | growth      | extracellul | positive     |
| GI_4504152-S | 200.1   | 214.6  | 196.7 CXCL1    | <a href="#">NM_001511.1</a> | GRO1;GROa;MGSA;NAP-3;SCYB1;MGSA-a  | cytokine    | soluble     | pan-neural   |
| GI_4504154-S | 95.4    | 102.9  | 96.2 CXCL2     | <a href="#">NM_002089.1</a> | GRO2;GROb;MIP2;MIP2A;SCYB2;MGSA-   | cytokine    | soluble     | chemotaxi    |
| GI_4504156-S | 153.1   | 138.3  | 124.3 CXCL3    | <a href="#">NM_002090.1</a> | GRO3;GROg;MIP2B;SCYB3;MIP-2b;CINC- | cytokine    | extracellul | G-protein    |
| GI_4504160-S | 1967.2  | 1788.7 | 1602.4 GRSF1   | <a href="#">NM_002092.1</a> |                                    | mRNA        | cytoplasm   | mRNA         |
| GI_4504166-S | 5232.1  | 5146.3 | 4307.9 GSPT1   | <a href="#">NM_002094.1</a> | GST1;ETF3A;eRF3a                   | GTPase      | nucleus     | G1/S         |
| GI_4504184-S | 438.7   | 615.7  | 600 GSTT1      | <a href="#">NM_000853.1</a> |                                    | glutathion  |             | response     |
| GI_4504190-S | 2050.2  | 1645.3 | 2015 MSH6      | <a href="#">NM_000179.1</a> | GTBP;HNPC5                         | DNA         | nucleus     | mismatch     |
| GI_4504196-S | 782.7   | 792.5  | 762 GTF2F1     | <a href="#">NM_002096.1</a> | BTF4;RAP74;TF2F1;TFIIF             | protein     | transcripti | transcripti  |
| GI_4504204-S | 2133.5  | 1873.3 | 1975 GTF3C2    | <a href="#">NM_001521.1</a> | KIAA0011;TFIIIC110;TFIIIC-BETA     | RNA         | transcripti | transcripti  |
| GI_4504210-S | 164.6   | 232    | 176.1 GUCY1A2  | <a href="#">NM_000855.1</a> | GC-SA2;GUC1A2                      | guanylate   | guanylate   | signal       |
| GI_4504212-S | 246.1   | 316.8  | 261.8 GUCY1A3  | <a href="#">NM_000856.1</a> | GUCA3;GC-SA3;GUC1A3;GUCSA3         | receptor    | guanylate   | nitric oxide |
| GI_4504214-S | 176.9   | 281.1  | 239.9 GUCY1B3  | <a href="#">NM_000857.1</a> | GUCB3;GC-SB3;GUC1B3;GUCSB3;GC-S-   | receptor    | guanylate   | nitric oxide |
| GI_4504216-S | 125.2   | 129.2  | 118.4 GUCY2D   | <a href="#">NM_000180.1</a> | LCA;LCA1;CORD6;GUC2D;retGC;GUC1A4; | receptor    | membran     | receptor     |
| GI_4504218-S | 86.4    | 116.2  | 94.6 GUCY2F    | <a href="#">NM_001522.1</a> | GC-F;GUC2F;GUC2DL;RETGC-2;ROS-GC2  | receptor    | nuclear     | receptor     |
| GI_4504222-S | 1434.8  | 1288.4 | 1456.8 GUSB    | <a href="#">NM_000181.1</a> | MPS7                               | beta-       | lysosome    | glycosami    |
| GI_4504234-S | 104.7   | 143.3  | 141.8 GZMK     | <a href="#">NM_002104.1</a> | PRSS;TRYP2                         | serine-     | cytoplasm   | proteolysis  |
| GI_4504236-S | 133.5   | 170.5  | 157.6 SEMA7A   | <a href="#">NM_003612.1</a> | CD108;SEMAL;CDw108;SEMAK1;H-Sema-  |             | peripheral  | immune       |
| GI_4504252-S | 2584.4  | 3286.6 | 4178.3 H2AFX   | <a href="#">NM_002105.1</a> | H2AX;H2A.X;H2A/X                   | DNA         | chromoso    | nucleoso     |
| GI_4504326-S | 1356.9  | 1390   | 1231 HADHB     | <a href="#">NM_000183.1</a> | HADH                               | acetyl-     | mitochond   | fatty acid   |
| GI_4504334-S | 94.6    | 104.9  | 99.8 HAPIP     | <a href="#">NM_003947.1</a> | duo;HS.8004                        | guanyl-     |             | vesicle-     |
| GI_4504338-S | 118.4   | 123.7  | 108.7 HAS1     | <a href="#">NM_001523.1</a> | HAS                                | transferas  | extracellul | glycosami    |
| GI_4504340-S | 640.3   | 717    | 811.8 HAT1     | <a href="#">NM_003642.1</a> |                                    | histone     | nucleus     | internal     |
| GI_4504364-S | 279.9   | 341    | 289.4 HDC      | <a href="#">NM_002112.1</a> |                                    | histidine   |             | histidine    |
| GI_4504366-S | 213.6   | 239.2  | 196.2 HESX1    | <a href="#">NM_003865.1</a> | RPX                                | DNA         | nucleus     | brain        |
| GI_4504374-S | 112     | 119.2  | 115.4 HF1      | <a href="#">NM_000186.1</a> | HF;CFH;HUS;FHL1                    | compleme    | extracellul | compleme     |
| GI_4504380-S | 109.5   | 111.6  | 99 HGD         | <a href="#">NM_000187.1</a> | AKU;HGO                            | homogenti   |             | tyrosine     |
| GI_4504388-S | 263.7   | 221.1  | 231.8 HIVEP1   | <a href="#">NM_002114.1</a> | MBP-1;ZNF40;PRDII-BF1              | transcripti | nucleus     | regulation   |
| GI_4504390-A | 7776.5  | 6788.7 | 6649.6 HK1     | <a href="#">NM_000188.1</a> | HKI;HXK1                           | hexokinas   | membran     | glycolysis   |
| GI_4504390-I | 129.4   | 137.6  | 134.5 HK1      | <a href="#">NM_000188.1</a> | HKI;HXK1                           | hexokinas   | membran     | glycolysis   |
| GI_4504394-S | 73.7    | 75.2   | 70.6 HK3       | <a href="#">NM_002115.1</a> | HXK3;HXKIII                        | hexokinas   | membran     | glycolysis   |
| GI_4504410-S | 101.6   | 107.8  | 108 HLA-DRB1   | <a href="#">NM_002124.1</a> | HLA-DR1B                           | class II    | integral to | pathogene    |
| GI_4504416-S | 344.9   | 545.9  | 339.4 MR1      | <a href="#">NM_001531.1</a> | HLALS                              | class I     |             | immune       |
| GI_4504426-S | 344.1   | 360.8  | 290.7 HMGCL    | <a href="#">NM_000191.1</a> | HL                                 | hydroxym    | mitochond   | amino        |
| GI_4504436-S | 598.4   | 631.4  | 512.3 HMOX1    | <a href="#">NM_002133.1</a> | HO-1;bK286B10                      | heme        | microsom    | heme         |
| GI_4504444-A | 14398.7 | 12432  | 9917.1 HNRPA1  | <a href="#">NM_002136.1</a> | HNRNPA1                            | heterogen   | nucleoplas  | RNA-         |
| GI_4504450-S | 3898.1  | 3525.8 | 2501.9 RBMX    | <a href="#">NM_002139.1</a> | HNRPG;hnRNP-G                      | RNA         | heterogen   | biological_  |
| GI_4504480-A | 104.9   | 110.9  | 104.9 HPN      | <a href="#">NM_002151.1</a> | TMPRSS1                            | serine-     | integral to | cell growth  |
| GI_4504482-S | 867.6   | 958.6  | 839.5 HPRT1    | <a href="#">NM_000194.1</a> | HPRT;HGPR                          | hypoxanth   | cytoplasm   | purine       |
| GI_4504486-S | 144.5   | 141.7  | 132.8 HRC      | <a href="#">NM_002152.1</a> |                                    | calcium     | smooth      | muscle       |
| GI_4504492-S | 128.5   | 111.8  | 112.8 HRK      | <a href="#">NM_003806.1</a> | DP5;HARAKIRI                       | apoptosis   |             | negative     |
| GI_4504494-S | 1952.2  | 1536.9 | 1225.1 HRMT1L1 | <a href="#">NM_001535.1</a> | PRMT2                              | signal      | nucleus     | protein      |
| GI_4504500-S | 110.9   | 114.1  | 102.5 HSD17B1  | <a href="#">NM_000413.1</a> | HSD17;EDHB17;EDH17B2               | catalytic   | cytoplasm   | estrogen     |

|              |         |        |        |         |                             |                                        |              |             |             |
|--------------|---------|--------|--------|---------|-----------------------------|----------------------------------------|--------------|-------------|-------------|
| GI_4504502-S | 195     | 198.9  | 222.4  | HSD17B2 | <a href="#">NM_002153.1</a> | HSD17;EDH17B2                          | estradiol    | endoplas    | estrogen    |
| GI_4504504-S | 548.6   | 683.4  | 787    | HSD17B4 | <a href="#">NM_000414.1</a> |                                        | estradiol    | peroxisom   | steroid     |
| GI_4504506-S | 188.1   | 216    | 188.4  | HSD3B1  | <a href="#">NM_000862.1</a> | HSD3B;HSDB3                            | steroid      | endoplas    | steroid     |
| GI_4504508-S | 113.8   | 126.7  | 110.9  | HSD3B2  | <a href="#">NM_000198.1</a> | HSDB;HSDB3                             | steroid      | endoplas    | steroid     |
| GI_4504510-S | 1997.3  | 3307.4 | 2628.1 | DNAJA1  | <a href="#">NM_001539.1</a> | HDJ2;HSDJ;HSJ2;HSPF4                   | heat         |             | heat        |
| GI_4504522-S | 6290.3  | 7993.1 | 7861.5 | HSPE1   | <a href="#">NM_002157.1</a> | CPN10;GROES;HSP10                      | co-          | mitochond   | protein     |
| GI_4504530-S | 113.3   | 125.7  | 115.7  | HTR1A   | <a href="#">NM_000524.1</a> | ADRBRL1;ADRB2RL1                       | serotonin    | integral to | positive    |
| GI_4504532-S | 115.9   | 130.5  | 105.4  | HTR1B   | <a href="#">NM_000863.1</a> | S12;HTR1D2;HTR1DB                      | serotonin    | integral to | G-protein   |
| GI_4504536-S | 119.2   | 120.6  | 120.5  | HTR1E   | <a href="#">NM_000865.1</a> |                                        | serotonin    | integral to | G-protein   |
| GI_4504540-S | 85.6    | 80     | 83.9   | HTR2C   | <a href="#">NM_000868.1</a> | HTR1C                                  | serotonin    | integral to | serotonin   |
| GI_4504542-S | 151.4   | 197.7  | 180.8  | HTR3A   | <a href="#">NM_000869.1</a> | HTR3                                   | serotonin-   | integral to | small       |
| GI_4504544-S | 106.1   | 112.2  | 94.9   | HTR6    | <a href="#">NM_000871.1</a> |                                        | histamine    | integral to | G-protein   |
| GI_4504548-S | 434.8   | 350.3  | 637.6  | TNC     | <a href="#">NM_002160.1</a> | TN;HXB                                 | binding      | extracellul | cell        |
| GI_4504566-S | 131.9   | 168.1  | 158.4  | ICSBP1  | <a href="#">NM_002163.1</a> | IRF8;ICSBP;IRF-8                       | RNA          | nucleus     | immune      |
| GI_4504578-S | 147.1   | 285.2  | 203.9  | IF      | <a href="#">NM_000204.1</a> | FI                                     | compleme     | membran     | compleme    |
| GI_4504584-S | 171.4   | 247.1  | 210.4  | IFIT1   | <a href="#">NM_001548.1</a> | G10P1;IFI56;IFI-56;IFNA11;RNM561;GARG- | molecular    | cytoplasm   | immune      |
| GI_4504588-S | 102.9   | 97.5   | 87.9   | IFNA10  | <a href="#">NM_002171.1</a> |                                        | interferon-  | extracellul | defense     |
| GI_4504590-S | 83      | 90.3   | 94.9   | IFNA14  | <a href="#">NM_002172.1</a> |                                        | hematopoi    | extracellul | defense     |
| GI_4504592-S | 95.8    | 97.4   | 91.7   | IFNA16  | <a href="#">NM_002173.1</a> |                                        | interferon-  | extracellul | defense     |
| GI_4504594-S | 99.4    | 100.9  | 98.4   | IFNA21  | <a href="#">NM_002175.1</a> |                                        | hematopoi    | extracellul | defense     |
| GI_4504596-S | 95.5    | 100.6  | 83.9   | IFNA5   | <a href="#">NM_002169.1</a> | INFA5                                  | hematopoi    | extracellul | defense     |
| GI_4504598-S | 144.3   | 145.1  | 153.9  | IFNA8   | <a href="#">NM_002170.1</a> |                                        | hematopoi    | extracellul | defense     |
| GI_4504602-S | 124.6   | 123.1  | 109.3  | IFNB1   | <a href="#">NM_002176.1</a> | IFB;IFF;IFNB                           | interferon-  | extracellul | response    |
| GI_4504604-S | 109.3   | 109.2  | 95.6   | IFNW1   | <a href="#">NM_002177.1</a> |                                        | interferon-  | extracellul | response    |
| GI_4504606-S | 1287.1  | 794.2  | 541.6  | IFRD1   | <a href="#">NM_001550.1</a> | PC4;TIS7                               |              |             | myoblast    |
| GI_4504610-S | 930.1   | 1181.7 | 1204.9 | IGF2R   | <a href="#">NM_000876.1</a> | MPRI;CD222;CIMPR;M6P-R                 | insulin-like | lysosome    | receptor    |
| GI_4504614-S | 105.6   | 105.7  | 106.2  | IGFBP1  | <a href="#">NM_000596.1</a> | IBP1;IGF-BP25                          | insulin-like | extracellul | signal      |
| GI_4504618-S | 2357.3  | 5996.6 | 2930.4 | IGFBP7  | <a href="#">NM_001553.1</a> | PSF;FSTL2;MAC25;IGFBP-7                | insulin-like | extracellul | negative    |
| GI_4504622-S | 601.6   | 650.5  | 718.3  | IGHMBP2 | <a href="#">NM_002180.1</a> | HCSA;CATF1;SMARD1;SMUBP2               | DNA          | nucleus     | single-     |
| GI_4504626-S | 155.8   | 173.9  | 166.5  | IGSF3   | <a href="#">NM_001542.1</a> | V8;EWI-3                               |              | membran     |             |
| GI_4504688-S | 14880.1 | 11505  | 9198.2 | IMPDH2  | <a href="#">NM_000884.1</a> | IMPD2                                  | IMP          |             | purine      |
| GI_4504692-S | 135.3   | 157.6  | 135.8  | INE1    | <a href="#">NM_003669.1</a> |                                        | molecular    | cellular_co | biological_ |
| GI_4504694-S | 263.8   | 267.7  | 289.8  | ING1L   | <a href="#">NM_001564.1</a> | p33ING2                                | chromatin    | chromoso    | signal      |
| GI_4504698-S | 585.8   | 2825.2 | 1332.8 | INHBA   | <a href="#">NM_002192.1</a> | EDF;FRP                                | transformi   | extracellul | cell growth |
| GI_4504700-S | 160     | 155.2  | 164    | CXCL10  | <a href="#">NM_001565.1</a> | C7;IFI10;INP10;IP-10;crg-2;mob-        | chemokin     | soluble     | positive    |
| GI_4504704-I | 128     | 131.4  | 119.5  | INPP4A  | <a href="#">NM_001566.1</a> | INPP4                                  |              |             | signal      |
| GI_4504706-S | 271.3   | 290.3  | 233.9  | INPP4B  | <a href="#">NM_003866.1</a> |                                        | inositol-    |             | signal      |
| GI_4504710-S | 113.6   | 141.5  | 109.3  | INSL4   | <a href="#">NM_002195.1</a> | EPIL;PLACENTIN                         | insulin-like | soluble     | pregnancy   |
| GI_4504720-S | 2284    | 1247.8 | 1036.9 | IRF1    | <a href="#">NM_002198.1</a> | MAR;IRF-1                              | transcripti  | nucleus     | oncogene    |
| GI_4504724-S | 555.2   | 644.9  | 805.8  | IRF3    | <a href="#">NM_001571.1</a> |                                        | transcripti  | nucleus     | transcripti |
| GI_4504732-S | 77.8    | 86.1   | 92.9   | IRS4    | <a href="#">NM_003604.1</a> | IRS-4;PY160                            | SH3/SH2      | peripheral  | signal      |
| GI_4504736-S | 170.1   | 151.1  | 199.7  | ISL1    | <a href="#">NM_002202.1</a> | Isl-1                                  | RNA          | nucleus     | energy      |
| GI_4504738-S | 368.3   | 412.3  | 337.7  | CXorf12 | <a href="#">NM_003492.1</a> | ITBA1;DXS9878E                         | molecular    | cellular_co | biological_ |
| GI_4504746-I | 279.3   | 312.2  | 316.3  | ITGA3   | <a href="#">NM_002204.1</a> | VL3A;CD49C;GAPB3;MSK18;VCA-            | cell         | integrin    | cell-matrix |

|              |         |        |        |        |                             |                                   |              |             |             |
|--------------|---------|--------|--------|--------|-----------------------------|-----------------------------------|--------------|-------------|-------------|
| GI_4504750-S | 661.1   | 1444.6 | 1238.9 | ITGA5  | <a href="#">NM_002205.1</a> | FNRA;CD49e;VLA5A                  | cell         | integrin    | cell        |
| GI_4504752-S | 111.7   | 120    | 128.1  | ITGA7  | <a href="#">NM_002206.1</a> |                                   | cell         | integrin    | homophili   |
| GI_4504756-S | 114.7   | 115.9  | 104.4  | ITGAL  | <a href="#">NM_002209.1</a> | CD11A;LFA-1;LFA1A                 | cell         | integrin    | cell        |
| GI_4504776-S | 94      | 108.4  | 97.5   | ITGB7  | <a href="#">NM_000889.1</a> |                                   | cell         | integrin    | cell        |
| GI_4504778-S | 99.2    | 129.7  | 134.7  | ITGB8  | <a href="#">NM_002214.1</a> |                                   | cell         | integrin    | cell        |
| GI_4504780-S | 154.6   | 157.4  | 142.8  | ITIH1  | <a href="#">NM_002215.1</a> | H1P;ITIH;IATIH                    | serine       |             |             |
| GI_4504782-S | 99.4    | 103.8  | 89.9   | ITIH2  | <a href="#">NM_002216.1</a> | H2P                               | endopepti    |             |             |
| GI_4504788-S | 616     | 441.6  | 764.4  | ITPKA  | <a href="#">NM_002220.1</a> |                                   | inositol-    |             | signal      |
| GI_4504792-S | 241.6   | 309.5  | 255.3  | ITPR2  | <a href="#">NM_002223.1</a> | IP3R2                             | inositol-    | integral to | small       |
| GI_4504794-S | 8972.2  | 5677.5 | 6976.4 | ITPR3  | <a href="#">NM_002224.1</a> | IP3R3                             | inositol-    | brush       | small       |
| GI_4504796-S | 121.9   | 132.2  | 118.1  | ITSN1  | <a href="#">NM_003024.1</a> | ITSN;SH3D1A;SH3P17                | calcium      | kinesin     | synaptic    |
| GI_4504802-S | 834.4   | 898.5  | 880.9  | JAK1   | <a href="#">NM_002227.1</a> | JAK1A                             | protein-     | peripheral  | protein     |
| GI_4504810-I | 113.1   | 217.1  | 212.7  | JUP    | <a href="#">NM_002230.1</a> | DP3;PDGB;PKGB;DPIII               | cytoskelet   | soluble     | cell        |
| GI_4504848-S | 89.9    | 91.3   | 91.2   | KCNK3  | <a href="#">NM_002246.1</a> | OAT1;TASK;TBAK1;TASK-1            | potassium    | integral to | potassium   |
| GI_4504864-S | 3203.3  | 3485.9 | 2747.6 | KHSRP  | <a href="#">NM_003685.1</a> | FBP2;KSRP;FUBP2                   | pre-mRNA     | nucleus     | mRNA        |
| GI_4504878-S | 104.9   | 103.8  | 89.3   | KLRB1  | <a href="#">NM_002258.1</a> | NKR;CD161;NKR-P1;NKRP1A;NKR-P1A   | lectin [goid | plasma      | cell        |
| GI_4504884-I | 165.8   | 154.7  | 162.3  | KLRC3  | <a href="#">NM_002261.1</a> | NKG2E;NKG2-E                      | transmem     | integral to | cellular    |
| GI_4504890-S | 175.9   | 208.9  | 186.2  | KMO    | <a href="#">NM_003679.1</a> |                                   | kynurenin    |             | metabolis   |
| GI_4504894-S | 1174.8  | 1306.5 | 1452   | KPNA1  | <a href="#">NM_002264.1</a> | RCH2;SRP1;IPOA5;NPI-1             | nuclear      | importin,   | regulation  |
| GI_4504896-S | 3537.7  | 4387.7 | 4859.1 | KPNA2  | <a href="#">NM_002266.1</a> | QIP2;RCH1;IPOA1;SRP1alpha         | nuclear      | importin,   | spindle     |
| GI_4504918-S | 1834.9  | 4930.3 | 2983   | KRT8   | <a href="#">NM_002273.1</a> | K8;KO;CK8;CYK8;K2C8;CARD2         | structural   | kinesin     | cytoskelet  |
| GI_4504936-S | 147     | 111.2  | 142.4  | KYNU   | <a href="#">NM_003937.1</a> |                                   | peptidase    |             | tryptophan  |
| GI_4504938-S | 122.6   | 117.5  | 116.2  | LAF4   | <a href="#">NM_002285.1</a> | MLLT2-like                        | transcripti  | nucleus     | oncogene    |
| GI_4504946-S | 106.7   | 136.7  | 114.4  | LALBA  | <a href="#">NM_002289.1</a> |                                   | antimicrob   | extracellul | induction   |
| GI_4504950-S | 2221.7  | 3620.3 | 1348.4 | LAMB1  | <a href="#">NM_002291.1</a> |                                   | structural   | basement    | cell        |
| GI_4504956-A | 745.3   | 1017.1 | 838.7  | LAMP2  | <a href="#">NM_002294.1</a> | LAMPB;CD107b                      |              | lysosomal   |             |
| GI_4504956-I | 1174    | 1613.1 | 1297.5 | LAMP2  | <a href="#">NM_002294.1</a> | LAMPB;CD107b                      |              | lysosomal   |             |
| GI_4504970-S | 397.3   | 150.4  | 217.8  | LDB2   | <a href="#">NM_001290.1</a> | LDB1;CLIM1                        | transcripti  | nucleus     |             |
| GI_4504976-S | 88.8    | 93.2   | 93.9   | LECT2  | <a href="#">NM_002302.1</a> | chm2;chm-II                       |              | extracellul | chemotaxi   |
| GI_4504982-S | 351     | 401.6  | 449    | LGALS3 | <a href="#">NM_002306.1</a> | GAL3;MAC2;CBP35;GALBP;LGALS2      | lectin [goid | nucleus     | heterophili |
| GI_4504984-S | 103.9   | 139.5  | 119.7  | LGALS7 | <a href="#">NM_002307.1</a> | GAL7;PIG1;TP53I1                  | lectin [goid | extracellul | cell growth |
| GI_4505004-S | 201.6   | 262.1  | 213.5  | LMO1   | <a href="#">NM_002315.1</a> | TTG1;RBTN1;RHOM1                  | transcripti  |             | developm    |
| GI_4505006-S | 138.4   | 129.8  | 118.4  | LMX1B  | <a href="#">NM_002316.1</a> | NPS1;LMX1.2                       | transcripti  | nucleus     | regulation  |
| GI_4505010-S | 13890.7 | 17584  | 19108  | LOXL2  | <a href="#">NM_002318.1</a> | WS9-14                            | electron     | membran     | aging       |
| GI_4505014-S | 292.3   | 250.7  | 141    | LRP3   | <a href="#">NM_002333.1</a> |                                   | LDL          | integral to | receptor    |
| GI_4505016-S | 189.6   | 225.1  | 211.9  | LRP6   | <a href="#">NM_002336.1</a> |                                   | LDL          | integral to |             |
| GI_4505018-S | 536.9   | 794.1  | 334.6  | LRP5   | <a href="#">NM_002335.1</a> | HBM;LR3;OPS;LRP7;OPPG;BMND1;VBCH2 | LDL          | integral to | positive    |
| GI_4505020-S | 1027.1  | 1309.9 | 1261.7 | LRPAP1 | <a href="#">NM_002337.1</a> | RAP;MRAP;A2RAP;HBP44;A2MRAP       | asialoglyc   | integral to | vesicle-    |
| GI_4505028-S | 5099    | 4487   | 4093.5 | LTA4H  | <a href="#">NM_000895.1</a> |                                   | leukotrien   |             | leukotrien  |
| GI_4505036-S | 951.8   | 666.6  | 724.5  | LTBP4  | <a href="#">NM_003573.1</a> | LTBP-4                            | protein      | extracellul |             |
| GI_4505038-S | 1300    | 1527.6 | 1511.5 | LTBR   | <a href="#">NM_002342.1</a> | CD18;TNFCR;TNFR-RP;TNFRSF3;TNFR2- | receptor     | integral to | signal      |
| GI_4505042-S | 245.3   | 227.6  | 136.9  | LTF    | <a href="#">NM_002343.1</a> | HLF2                              | serine-      | extracellul | humoral     |
| GI_4505048-S | 1359.3  | 1683.4 | 1641.1 | LY6E   | <a href="#">NM_002346.1</a> | RIGE;SCA2;RIG-E;SCA-2;TSA-1       |              | membran     | defense     |
| GI_4505050-S | 106.4   | 111.6  | 102.7  | LY6H   | <a href="#">NM_002347.1</a> | NMLY6                             |              | membran     | histogene   |

|              |         |        |        |          |                             |                                 |             |             |              |
|--------------|---------|--------|--------|----------|-----------------------------|---------------------------------|-------------|-------------|--------------|
| GI_4505052-S | 105.4   | 115.1  | 100.7  | LY75     | <a href="#">NM_002349.1</a> | DEC-205;GP200-MR6               | defense/i   | integral to | immune       |
| GI_4505054-S | 342.1   | 349.9  | 349.3  | LYN      | <a href="#">NM_002350.1</a> | JTK8                            | protein-    | peripheral  | protein      |
| GI_4505056-S | 122.6   | 111.9  | 104.2  | TACSTD2  | <a href="#">NM_002353.1</a> | M1S1;EGP-1;GA733;TROP2;GA733-1  | receptor    | membran     | vision       |
| GI_4505058-S | 93.6    | 109.6  | 102.6  | TACSTD1  | <a href="#">NM_002354.1</a> | EGP;KSA;M4S1;MK-                | lymphocyt   | plasma      |              |
| GI_4505064-S | 912.3   | 370    | 572.9  | MAD1L1   | <a href="#">NM_003550.1</a> | MAD1;PIG9;HsMAD1;TP53I9;TXBP181 |             | centrosom   | mitotic      |
| GI_4505068-S | 148.2   | 157.6  | 138.3  | MAD      | <a href="#">NM_002357.1</a> | MXD1                            | transcripti | nucleus     | developm     |
| GI_4505072-S | 1862.7  | 2094.7 | 2555.9 | MAFG     | <a href="#">NM_002359.1</a> |                                 | transcripti | chromatin   | transcripti  |
| GI_4505074-S | 276.3   | 364.7  | 319.7  | MAFK     | <a href="#">NM_002360.1</a> | P18;NFE2U                       | transcripti | chromatin   | regulation   |
| GI_4505088-S | 195     | 242.9  | 195.9  | MAGP2    | <a href="#">NM_003480.1</a> | MP25                            | extracellul | extracellul |              |
| GI_4505120-S | 2392.2  | 2440.9 | 1931.7 | MBD4     | <a href="#">NM_003925.1</a> | MED1                            | satellite   | nucleus     | DNA          |
| GI_4505122-S | 221.8   | 268.8  | 231.9  | MBP      | <a href="#">NM_002385.1</a> |                                 | structural  | nucleus     | nerve        |
| GI_4505126-S | 242.2   | 310.1  | 267.2  | MC2R     | <a href="#">NM_000529.1</a> | ACTHR                           | adrenocor   | integral to | G-protein    |
| GI_4505128-S | 123.4   | 145    | 134.5  | MCC      | <a href="#">NM_002387.1</a> |                                 | tumor       |             | signal       |
| GI_4505136-I | 109.3   | 133.3  | 101.5  | MDM2     | <a href="#">NM_002392.1</a> | hdm2                            |             |             | negative     |
| GI_4505138-S | 335.3   | 387.7  | 325.8  | MDM4     | <a href="#">NM_002393.1</a> | MDMX                            |             | nucleus     | negative     |
| GI_4505148-S | 806.5   | 534.8  | 810.9  | SERPINB7 | <a href="#">NM_003784.1</a> | MEGSIN                          | serpin      |             |              |
| GI_4505168-S | 80.2    | 95.5   | 84.9   | SCGB2A2  | <a href="#">NM_002411.1</a> | MGB1;UGB2                       | steroid     | cellular_co | biological_  |
| GI_4505170-S | 103.8   | 118.1  | 103.8  | SCGB2A1  | <a href="#">NM_002407.1</a> | LPHC;MGB2;UGB3                  | androgen    | cellular_co | biological_  |
| GI_4505174-I | 145.1   | 169.4  | 157.7  | KITLG    | <a href="#">NM_000899.1</a> | SF;MGF;SCF;KL-1;Kitl            | stem cell   | integral to | histogene    |
| GI_4505176-S | 309.4   | 310.8  | 648.7  | MGMT     | <a href="#">NM_002412.1</a> |                                 | DNA-        | nucleus     | DNA          |
| GI_4505178-S | 198.9   | 246.2  | 182.1  | MGP      | <a href="#">NM_000900.1</a> | NTI;MGLAP                       | structural  | extracellul | ossificatio  |
| GI_4505184-S | 14686.7 | 16736  | 12028  | MIF      | <a href="#">NM_002415.1</a> | GIF;GLIF;MMIF                   | cytokine    | extracellul | immune       |
| GI_4505186-S | 123     | 123.8  | 113.5  | CXCL9    | <a href="#">NM_002416.1</a> | CMK;MIG;Humig;SCYB9;crg-10      | cytokine    | extracellul | chemotaxi    |
| GI_4505196-S | 140.5   | 154.3  | 138.4  | MLL2     | <a href="#">NM_003482.1</a> | ALR                             | transcripti | nucleus     | oncogene     |
| GI_4505198-S | 171.4   | 110.2  | 146.8  | NR3C2    | <a href="#">NM_000901.1</a> | MR;MCR;MLR                      | steroid     | nucleus     | sodium       |
| GI_4505204-S | 118.1   | 115.8  | 113.4  | MMP10    | <a href="#">NM_002425.1</a> | SL-2;STMY2                      | zinc ion    | extracellul | proteolysis  |
| GI_4505206-S | 121.8   | 119.5  | 114.4  | MMP12    | <a href="#">NM_002426.1</a> | HME;MME                         | macropha    | extracellul | proteolysis  |
| GI_4505220-S | 117.4   | 138.9  | 120.6  | MMP8     | <a href="#">NM_002424.1</a> | HNC;CLG1;PMNL-CL                | neutrophil  | extracellul | proteolysis  |
| GI_4505222-S | 125.4   | 160.2  | 128.5  | MN1      | <a href="#">NM_002430.1</a> | MGCR;MGCR1;MGCR1-PEN            | molecular   | cellular_co | cell growth  |
| GI_4505224-S | 1093.4  | 1061.8 | 810    | MNAT1    | <a href="#">NM_002431.1</a> | MAT1;RNF66                      | zinc ion    | nucleus     | regulation   |
| GI_4505226-S | 77.9    | 76.3   | 70.1   | MNDA     | <a href="#">NM_002432.1</a> |                                 | DNA         | nucleus     | cellular     |
| GI_4505230-S | 387.7   | 429.9  | 416.7  | MPDZ     | <a href="#">NM_003829.1</a> | MUPP1                           | protein     |             | intracellula |
| GI_4505232-S | 1077.4  | 906.3  | 884.4  | MPG      | <a href="#">NM_002434.1</a> | AAG;MDG;APNG                    | damaged     | nucleoplas  | DNA          |
| GI_4505234-S | 458.7   | 612.8  | 448.6  | MPI      | <a href="#">NM_002435.1</a> | PMI;PMI1                        | mannose-    |             | mannose      |
| GI_4505244-S | 116.4   | 110    | 101.1  | MRC1     | <a href="#">NM_002438.1</a> |                                 | mannose     | integral to | receptor     |
| GI_4505248-S | 1232    | 1454   | 1395.4 | MSH3     | <a href="#">NM_002439.1</a> |                                 | damaged     |             | mismatch     |
| GI_4505256-S | 3492.9  | 3852.4 | 3058.6 | MSN      | <a href="#">NM_002444.1</a> |                                 | structural  | cytoskelet  | cell         |
| GI_4505264-S | 125.3   | 161    | 132.3  | MST1R    | <a href="#">NM_002447.1</a> | RON;CDw136                      | macropha    | integral to | positive     |
| GI_4505266-S | 1092    | 1127.4 | 259.6  | MSX1     | <a href="#">NM_002448.1</a> | HOX7;HYD1                       | transcripti | nucleus     | skeletal     |
| GI_4505276-S | 866.5   | 732.2  | 639    | MTIF2    | <a href="#">NM_002453.1</a> |                                 | translation | mitochond   | regulation   |
| GI_4505278-A | 1158    | 1070.5 | 910.9  | MTRR     | <a href="#">NM_002454.1</a> | MSR                             | electron    | mitochond   | amino        |
| GI_4505278-I | 125.1   | 123.2  | 118    | MTRR     | <a href="#">NM_002454.1</a> | MSR                             | electron    | mitochond   | amino        |
| GI_4505284-S | 109     | 118.8  | 97.3   | MUC2     | <a href="#">NM_002457.1</a> |                                 |             | secretory   |              |
| GI_4505286-S | 113     | 116.6  | 111    | IRF4     | <a href="#">NM_002460.1</a> | MUM1;LSIRF                      | RNA         | nucleus     | oncogene     |

|              |        |        |        |          |                             |                                |                          |                        |
|--------------|--------|--------|--------|----------|-----------------------------|--------------------------------|--------------------------|------------------------|
| GI_4505288-S | 220    | 215.7  | 198.6  | MVD      | <a href="#">NM_002461.1</a> | MPD                            | diphospho                | isoprenoid             |
| GI_4505294-S | 176.3  | 191.3  | 160.4  | MYBPC1   | <a href="#">NM_002465.1</a> | MYBPCC;MYBPCS                  | structural striated      | striated               |
| GI_4505298-S | 164.6  | 173.5  | 178.5  | MYF6     | <a href="#">NM_002469.1</a> | MRF4;HERCULIN                  | transcripti nucleus      | myogenes               |
| GI_4505300-S | 112.3  | 95.6   | 103.6  | MYH8     | <a href="#">NM_002472.1</a> | MyHC-pn;MyHC-peri              | structural muscle        | striated               |
| GI_4505304-S | 316.3  | 395.5  | 281.9  | MYL5     | <a href="#">NM_002477.1</a> |                                | structural muscle        | regulation             |
| GI_4505306-S | 252.1  | 249.6  | 248    | MYO7A    | <a href="#">NM_000260.1</a> | DFNB2;MYU7A;NSRD2;USH1B;DFNA11 | myosin kinesin           | hearing                |
| GI_4505312-S | 99.9   | 115.4  | 99.7   | MYOM1    | <a href="#">NM_003803.1</a> | SKELEMIN                       | structural striated      | muscle                 |
| GI_4505314-S | 157.2  | 210    | 115.4  | MYOM2    | <a href="#">NM_003970.1</a> | TTNAP                          | structural striated      | muscle                 |
| GI_4505316-S | 405.6  | 406.1  | 365.3  | PPP1R12A | <a href="#">NM_002480.1</a> | MBS;MYPT1                      | signal actin             | regulation             |
| GI_4505324-S | 715    | 661.4  | 809.5  | SSNA1    | <a href="#">NM_003731.1</a> | N14;NA14                       |                          | kinesin                |
| GI_4505328-S | 2391.7 | 3209.8 | 4188.9 | NAPA     | <a href="#">NM_003827.1</a> | SNAPA;ALPHASNAP;alpha SNAP     | intracellula inter-Golgi | intra-Golgi            |
| GI_4505330-S | 254.7  | 313    | 311.1  | NAPG     | <a href="#">NM_003826.1</a> | GAMMASNAP                      | intracellula inter-Golgi | intra-Golgi            |
| GI_4505336-S | 1835.7 | 1786.3 | 1594.2 | NUBP1    | <a href="#">NM_002484.1</a> | NBP;NBP1                       | nucleotide               | septin                 |
| GI_4505346-S | 158.7  | 158.6  | 135    | NCK2     | <a href="#">NM_003581.1</a> | GRB4;NCKbeta                   | cytoskelet cytoplasm     | regulation             |
| GI_4505360-S | 143    | 209.4  | 182.4  | NDUFB3   | <a href="#">NM_002491.1</a> | B12                            | NADH                     | NADH mitochond         |
| GI_4505368-S | 2982   | 3176.7 | 2307.4 | NDUFS4   | <a href="#">NM_002495.1</a> | AQDQ                           | NADH                     | NADH mitochond         |
| GI_4505370-S | 6789.3 | 7176.6 | 7949.7 | NDUFS8   | <a href="#">NM_002496.1</a> | TYKY                           | iron-sulfur              | NADH mitochond         |
| GI_4505372-S | 151.7  | 159.1  | 176.2  | NEK2     | <a href="#">NM_002497.1</a> | NLK1;HsPK21;HsPK 21            | protein centrosom        | regulation             |
| GI_4505374-S | 145.8  | 177.1  | 212.9  | NEO1     | <a href="#">NM_002499.1</a> | NGN;HsT17534                   | tumor                    | integral to cell       |
| GI_4505376-S | 101.1  | 110.8  | 97.7   | NEUROD1  | <a href="#">NM_002500.1</a> | BETA2;BHF-1;NIDDM;NeuroD       | RNA                      | nucleus regulation     |
| GI_4505378-S | 1204.6 | 1579.7 | 1218.8 | NFE2L1   | <a href="#">NM_003204.1</a> | NRF1;TCF11;LCR-F1;FLJ00380     | transcripti nucleus      | heme                   |
| GI_4505380-S | 120.2  | 145.2  | 118.9  | NFIX     | <a href="#">NM_002501.1</a> | NF1A                           | transcripti nucleus      | transcripti            |
| GI_4505390-S | 112.8  | 158.9  | 112.9  | NGFB     | <a href="#">NM_002506.1</a> | NGF                            | signal                   | developm               |
| GI_4505392-S | 136    | 127.1  | 132.2  | NGFR     | <a href="#">NM_002507.1</a> | TNFRSF16;p75(NTR)              | transmem                 | integral to neurogene  |
| GI_4505394-S | 229    | 198    | 139.9  | NID      | <a href="#">NM_002508.1</a> | NID1;ENTACTIN                  | extracellul              | basement cell-matrix   |
| GI_4505396-S | 1052.8 | 775.6  | 478.1  | MAP3K14  | <a href="#">NM_003954.1</a> | HS;NIK;HSNIK;FTDCR1B           | protein                  | protein                |
| GI_4505398-S | 2001   | 2488.1 | 2218.2 | NIPSNAP1 | <a href="#">NM_003634.1</a> |                                | folic acid               | metabolis              |
| GI_4505404-S | 674.7  | 496.2  | 243.6  | GPNMB    | <a href="#">NM_002510.1</a> | NMB                            |                          | integral to negative   |
| GI_4505406-S | 91.7   | 101.3  | 93.3   | NMBR     | <a href="#">NM_002511.1</a> |                                | bombesin                 | integral to G-protein  |
| GI_4505408-S | 5166.7 | 4619.7 | 4104.1 | NME2     | <a href="#">NM_002512.1</a> | puf;NDPKB;NM23B;NM23-H2        | nucleoside               | nucleus negative       |
| GI_4505414-S | 659.8  | 1041.8 | 850.5  | NQO1     | <a href="#">NM_000903.1</a> | DTD;QR1;DHQU;DIA4;NMOR1;NMORI  | NAD(P)H                  | cytoplasm nitric oxide |
| GI_4505416-S | 436.5  | 457.8  | 540    | NQO2     | <a href="#">NM_000904.1</a> | QR2;DHQV;NMOR2                 | NADPH                    | electron               |
| GI_4505420-S | 136.5  | 159.1  | 154.1  | NOL4     | <a href="#">NM_003787.1</a> | NOLP;HRIHFB2255                | RNA                      | nucleolus              |
| GI_4505430-S | 372.9  | 385.8  | 399.5  | NPAT     | <a href="#">NM_002519.1</a> | E14                            |                          |                        |
| GI_4505432-S | 89.5   | 94.8   | 93.7   | NPPB     | <a href="#">NM_002521.1</a> | BNP                            | diuretic                 | extracellul fluid      |
| GI_4505436-I | 266.2  | 318.3  | 304.8  | NPR2     | <a href="#">NM_000907.1</a> | NPRB;ANPRB;GUC2B;NPRBi         | transmem                 | integral to regulation |
| GI_4505442-S | 109    | 122.4  | 111.2  | NPTX1    | <a href="#">NM_002522.1</a> | NP1                            |                          | transport              |
| GI_4505452-S | 2281.2 | 2448.2 | 1832.4 | NRD1     | <a href="#">NM_002525.1</a> |                                | metalloen                | neuromus               |
| GI_4505454-S | 370.3  | 482.5  | 728.1  | NRIP1    | <a href="#">NM_003489.1</a> | RIP140                         | transcripti nucleus      | transcripti            |
| GI_4505460-S | 528.9  | 546.6  | 456.2  | ENC1     | <a href="#">NM_003633.1</a> | NRPB;CCL28;ENC-1;PIG10;TP53110 | actin                    | cytoskelet developm    |
| GI_4505462-S | 712.4  | 480.5  | 602.2  | CNTNAP1  | <a href="#">NM_003632.1</a> | P190;CASPR;NRXN4;CNTNAP        | SH3/SH2                  | integral to signal     |
| GI_4505466-S | 106.9  | 120.1  | 93.1   | NT5E     | <a href="#">NM_002526.1</a> | eN;NT5;NTE;eNT;CD73;E5NT       | 5'-                      | membran DNA            |
| GI_4505474-S | 115    | 117    | 116    | NTRK3    | <a href="#">NM_002530.1</a> | TRKC                           | neurotrop                | integral to transmem   |
| GI_4505476-S | 119.4  | 114.5  | 162.1  | NTSR1    | <a href="#">NM_002531.1</a> | NTR                            | G-protein                | Golgi G-protein        |

|              |         |        |        |          |                             |                              |               |             |              |
|--------------|---------|--------|--------|----------|-----------------------------|------------------------------|---------------|-------------|--------------|
| GI_4505484-I | 116.6   | 127.8  | 111.2  | OAS2     | <a href="#">NM_002535.1</a> | P69                          | antiviral     | membran     | nucleobas    |
| GI_4505488-S | 5337    | 3411.6 | 4199.8 | ODC1     | <a href="#">NM_002539.1</a> |                              | ornithine     | cellular_co | polyamine    |
| GI_4505492-S | 285.9   | 346.1  | 342.8  | OGDH     | <a href="#">NM_002541.1</a> | E1k                          |               | oxoglutara  | energy       |
| GI_4505506-S | 113.7   | 120.5  | 123.4  | OPHN1    | <a href="#">NM_002547.1</a> | OPN1                         | Rho           |             | substrate-   |
| GI_4505514-S | 101.2   | 117.6  | 93.2   | OPRM1    | <a href="#">NM_000914.1</a> | OPRM;MOR-1                   | mu-opioid     | Golgi       | negative     |
| GI_4505516-S | 139.8   | 162    | 139.1  | OR1D2    | <a href="#">NM_002548.1</a> | OLFR1;OR17-4                 | olfactory     | integral to | olfaction    |
| GI_4505518-S | 91.8    | 88.1   | 91.4   | OR3A1    | <a href="#">NM_002550.1</a> | OR40;OLFRA03;OR17-40         | olfactory     | integral to | signal       |
| GI_4505540-S | 2540.2  | 2770.7 | 1884.2 | VDP      | <a href="#">NM_003715.1</a> | TAP;P115                     | vesicle       | Golgi       | nonselecti   |
| GI_4505564-S | 1600    | 2844.8 | 1511.5 | P4HA1    | <a href="#">NM_000917.1</a> | P4HA                         | procollage    | endoplas    | protein      |
| GI_4505574-S | 17759.6 | 21137  | 14802  | PABPC1   | <a href="#">NM_002568.1</a> | PAB1;PABP;PABP1;PABPL1       | poly(A)       | cytoplasm   | mRNA         |
| GI_4505582-S | 701.6   | 1158.6 | 353.6  | PAEP     | <a href="#">NM_002571.1</a> | GdA;GdS;PEP;PP14             | transporte    |             | developm     |
| GI_4505584-S | 112.6   | 145.2  | 127.5  | PAFAH1B2 | <a href="#">NM_002572.1</a> |                              | 1-alkyl-2-    | soluble     | lipid        |
| GI_4505594-S | 93.6    | 121.1  | 175.3  | SERPINB2 | <a href="#">NM_002575.1</a> | PAI;PAI2;PLANH2;HsT1201      | enzyme        |             | anti-        |
| GI_4505600-S | 224.2   | 276.6  | 252.4  | PAK3     | <a href="#">NM_002578.1</a> | MRX30;OPHN3;PAK3beta         | protein       |             | protein      |
| GI_4505608-S | 489.8   | 608.5  | 535    | PARG     | <a href="#">NM_003631.1</a> |                              | poly(ADP-     | cytoplasm   |              |
| GI_4505610-S | 990.4   | 1006.8 | 1017.7 | PARN     | <a href="#">NM_002582.1</a> | DAN                          | nuclease      | cytoplasm   | RNA          |
| GI_4505612-S | 816     | 744.5  | 391.1  | PAWR     | <a href="#">NM_002583.1</a> | PAR4;par-4                   | transcripti   | cytoplasm   | negative     |
| GI_4505614-A | 452.3   | 395.3  | 359    | PAX6     | <a href="#">NM_000280.1</a> | AN;AN2;MGDA;WAGR;D11S812E    | transcripti   | nucleus     | eye          |
| GI_4505622-S | 97.6    | 130.9  | 121    | PBX1     | <a href="#">NM_002585.1</a> |                              | transcripti   | nucleus     | transcripti  |
| GI_4505650-S | 225.1   | 269.1  | 383.3  | PCYT2    | <a href="#">NM_002861.1</a> | ET                           | ethanolam     | cellular_co | phospholi    |
| GI_4505656-S | 120.8   | 111.2  | 107    | PDE2A    | <a href="#">NM_002599.1</a> |                              | cGMP-         | membran     | signal       |
| GI_4505664-S | 131.1   | 145.8  | 138.3  | PDE4C    | <a href="#">NM_000923.1</a> | DPDE1                        | cAMP-         |             |              |
| GI_4505668-S | 95.1    | 120.5  | 90.2   | PDE6B    | <a href="#">NM_000283.1</a> | PDEB;CSNB3                   | cGMP-         | membran     | phototrans   |
| GI_4505670-S | 814.8   | 861.4  | 820.2  | PDE6D    | <a href="#">NM_002601.1</a> | PDED                         | 3',5'-cyclic- | peripheral  | vision       |
| GI_4505672-S | 196.6   | 339.7  | 315.8  | PDE6G    | <a href="#">NM_002602.1</a> | PDEG                         | enzyme        | nucleus     | vision       |
| GI_4505674-S | 98.3    | 96.3   | 95.1   | PDE9A    | <a href="#">NM_002606.1</a> | HSPDE9A2                     | 3',5'-cyclic- |             | signal       |
| GI_4505680-I | 262.2   | 300.2  | 277.1  | PDGFB    | <a href="#">NM_002608.1</a> | SIS;SSV;PDGF2;c-sis          | platelet-     | membran     | response     |
| GI_4505684-S | 3331.7  | 3186   | 2507.6 | PDHA1    | <a href="#">NM_000284.1</a> | PDHA;PHE1A;PDHCE1A           | pyruvate      | mitochond   | acetyl-      |
| GI_4505686-S | 3676.3  | 4653.5 | 4434.3 | PDHB     | <a href="#">NM_000925.1</a> | PHE1B                        | pyruvate      | mitochond   | glucose      |
| GI_4505694-S | 307.5   | 343.4  | 362.3  | PDPK1    | <a href="#">NM_002613.1</a> | PDK1;PRO0461                 | 3-            |             | insulin      |
| GI_4505696-S | 818.9   | 1061   | 794.9  | SLC26A4  | <a href="#">NM_000441.1</a> | PDS;DFNB4                    | iodide        | integral to | inorganic    |
| GI_4505698-S | 643.1   | 801    | 989.2  | PDHX     | <a href="#">NM_003477.1</a> | E3BP;OPDX;PDX1;proX;DLDBP    | electron      | pyruvate    | metabolis    |
| GI_4505712-S | 389.2   | 440    | 339.3  | PER1     | <a href="#">NM_002616.1</a> | PER;RIGUI                    | signal        | nucleus     | entrainme    |
| GI_4505716-S | 298.4   | 287.3  | 275.3  | PEX11A   | <a href="#">NM_003847.1</a> | PEX11-ALPHA                  |               | integral to | peroxisom    |
| GI_4505718-S | 663.1   | 713.1  | 873.4  | PEX11B   | <a href="#">NM_003846.1</a> | PEX11-BETA                   |               | integral to | peroxisom    |
| GI_4505720-S | 232.3   | 207.1  | 188.6  | PEX12    | <a href="#">NM_000286.1</a> |                              | protein       | integral to | protein-     |
| GI_4505722-S | 247.8   | 317.7  | 284.3  | PEX13    | <a href="#">NM_002618.1</a> | ZWS;NALD                     | protein       | integral to | intracellula |
| GI_4505724-S | 240.9   | 234.1  | 219.6  | PEX1     | <a href="#">NM_000466.1</a> | ZWS1                         | peroxisom     | peroxisom   | peroxisom    |
| GI_4505726-S | 305.6   | 276.4  | 270    | PEX3     | <a href="#">NM_003630.1</a> |                              |               | integral to | peroxisom    |
| GI_4505730-S | 512     | 543.2  | 356.5  | PEX7     | <a href="#">NM_000288.1</a> | PTS2R;RCDP1                  | peroxisom     | peroxisom   | protein-     |
| GI_4505732-S | 210.9   | 225.4  | 238.9  | PF4      | <a href="#">NM_002619.1</a> | CXCL4;SCYB4                  | chemokin      | extracellul | chemotaxi    |
| GI_4505734-S | 87.5    | 83.2   | 71.4   | PF4V1    | <a href="#">NM_002620.1</a> | PF4A;CXCL4V1;PF4-ALT;SCYB4V1 | chemokin      | extracellul | immune       |
| GI_4505736-S | 123     | 128.2  | 122.6  | PFC      | <a href="#">NM_002621.1</a> | BFD;PFD;PROPERDIN            | antibacteri   | extracellul | immune       |
| GI_4505744-S | 114.8   | 131.3  | 121.2  | PFKFB1   | <a href="#">NM_002625.1</a> | PFRX                         | fructose-     |             | fructose     |

|              |         |        |        |          |                             |                               |                        |              |
|--------------|---------|--------|--------|----------|-----------------------------|-------------------------------|------------------------|--------------|
| GI_4505754-S | 106.4   | 119.7  | 92.4   | PGAM2    | <a href="#">NM_000290.1</a> | PGAMM                         | phosphogl              | striated     |
| GI_4505756-S | 104.8   | 116.4  | 106.8  | PGC      | <a href="#">NM_002630.1</a> |                               | aspartic- extracellul  | proteolysis  |
| GI_4505774-I | 5048.8  | 5363.9 | 3777.3 | SLC25A3  | <a href="#">NM_002635.1</a> | PHC                           | phosphate mitochond    | small        |
| GI_4505778-S | 313.1   | 321.5  | 261.8  | PHKA1    | <a href="#">NM_002637.1</a> | PHKA                          | phosphory              | glycogen     |
| GI_4505780-S | 379.2   | 395.3  | 344    | PHKA2    | <a href="#">NM_000292.1</a> | PHK;PYK;XLG;PYKL;XLG2         | phosphory phosphory    | energy       |
| GI_4505782-S | 265.3   | 324.6  | 298.8  | PHKB     | <a href="#">NM_000293.1</a> |                               | phosphory              | glycogen     |
| GI_4505784-S | 169.3   | 175.6  | 195.4  | PHKG2    | <a href="#">NM_000294.1</a> |                               | phosphory              | glycogen     |
| GI_4505788-S | 486.8   | 753.5  | 567.5  | SERPINB5 | <a href="#">NM_002639.1</a> | PI5;maspin                    | serpin                 | cell         |
| GI_4505798-S | 149.6   | 191.6  | 190.2  | PIK3C2A  | <a href="#">NM_002645.1</a> | CPK;PI3-K-C2A;PI3-K-C2(ALPHA) | 1- phosphoin           | phosphati    |
| GI_4505806-A | 2953.8  | 2972.6 | 2515.5 | PIK4CA   | <a href="#">NM_002650.1</a> | pi4K230;PI4K-ALPHA            | 1- Golgi               | phosphati    |
| GI_4505806-I | 118.3   | 130.2  | 127.6  | PIK4CA   | <a href="#">NM_002650.1</a> | pi4K230;PI4K-ALPHA            | 1- Golgi               | phosphati    |
| GI_4505808-S | 454.9   | 438.2  | 409.1  | PIK4CB   | <a href="#">NM_002651.1</a> | PI4Kbeta;PI4K-BETA            | 1- endosome            | phosphati    |
| GI_4505812-S | 4377.3  | 4441   | 4154.4 | DNCL1    | <a href="#">NM_003746.1</a> | LC8;PIN;DLC1;DLC8;hdlc1       | enzyme cytoplasm       | nitric oxide |
| GI_4505814-S | 681.2   | 632.4  | 617.9  | PIP5K1A  | <a href="#">NM_003557.1</a> |                               | 1-                     | glyceroph    |
| GI_4505816-S | 83.6    | 86.8   | 100.4  | PIP5K1B  | <a href="#">NM_003558.1</a> | MSS4;STM7                     | 1-                     |              |
| GI_4505820-S | 85.3    | 91.5   | 97.8   | PIP      | <a href="#">NM_002652.1</a> | GP17;GCDFP-15                 | actin extracellul      | biological_  |
| GI_4505822-S | 262.6   | 421.5  | 231.3  | PIR      | <a href="#">NM_003662.1</a> |                               | transcripti nucleus    | transcripti  |
| GI_4505836-S | 482.4   | 471.6  | 454    | STK16    | <a href="#">NM_003691.1</a> | KRCT;MPSK;TSF1;PKL12          | protein                | protein      |
| GI_4505840-S | 104.4   | 111.2  | 106.3  | PKP1     | <a href="#">NM_000299.1</a> | B6P                           | signal intermedia      | signal       |
| GI_4505844-S | 443.2   | 443.1  | 391.7  | PLA2G10  | <a href="#">NM_003561.1</a> | SPLA2;GXPLA2;GXSPLA2          | secreted extracellul   | lipid        |
| GI_4505850-S | 138.4   | 138.4  | 115.3  | PLA2G4C  | <a href="#">NM_003706.1</a> | cPLA2-gamma                   | calcium- membran       | phospholi    |
| GI_4505852-S | 112.4   | 153.3  | 122.4  | PLA2G5   | <a href="#">NM_000929.1</a> |                               | calcium- extracellul   | phospholi    |
| GI_4505854-S | 219     | 228.7  | 252.1  | PLAG1    | <a href="#">NM_002655.1</a> | PSA;SGPA                      | transcripti            |              |
| GI_4505862-S | 33363.1 | 30879  | 24621  | PLAU     | <a href="#">NM_002658.1</a> | UPA;URK                       | u- extracellul         | cell growth  |
| GI_4505864-S | 753.6   | 710.6  | 1082.8 | PLAUR    | <a href="#">NM_002659.1</a> | CD87;UPAR;URKR                | GPI- plasma            | chemotaxi    |
| GI_4505870-S | 140.3   | 146.8  | 93     | PLCG2    | <a href="#">NM_002661.1</a> |                               | phospholi              | phospholi    |
| GI_4505872-S | 823.3   | 851.4  | 572.3  | PLD1     | <a href="#">NM_002662.1</a> |                               | phospholi membran      | small        |
| GI_4505876-A | 3087.2  | 3393   | 4554.8 | PLEC1    | <a href="#">NM_000445.1</a> | PCN;EBS1;EBSO;PLTN            | structural intermedia  | cytoskelet   |
| GI_4505878-S | 411.1   | 532.2  | 438.9  | PLEK     | <a href="#">NM_002664.1</a> | P47                           | calcium                | intracellula |
| GI_4505880-S | 90      | 96.4   | 91.1   | PLG      | <a href="#">NM_000301.1</a> |                               | plasmin nucleus        | negative     |
| GI_4505884-S | 357.6   | 423.6  | 380    | PLIN     | <a href="#">NM_002666.1</a> |                               | lipid lipid            | lipid        |
| GI_4505888-A | 4442.3  | 6955   | 4823.4 | PLOD2    | <a href="#">NM_000935.1</a> |                               | procollage membran     | protein      |
| GI_4505892-S | 3067.4  | 2594.6 | 3156.9 | PLP2     | <a href="#">NM_002668.1</a> | A4;A4-LSB                     | ion endoplas           | ion          |
| GI_4505894-S | 3020.4  | 2538   | 2263.7 | PLRG1    | <a href="#">NM_002669.1</a> | PRL1                          | transcripti nucleus    | nuclear      |
| GI_4505896-S | 390.1   | 326.2  | 331.6  | PLS1     | <a href="#">NM_002670.1</a> | I-PLASTIN                     | actin brush            |              |
| GI_4505898-S | 100.6   | 102.6  | 93.1   | PMCH     | <a href="#">NM_002674.1</a> | MCH                           | neuropepti extracellul | signal       |
| GI_4505900-S | 568.4   | 494.6  | 552.1  | C17orf35 | <a href="#">NM_003876.1</a> | PM1;PMI                       | G-protein integral to  | signal       |
| GI_4505904-S | 534.8   | 538.7  | 523.1  | PMM1     | <a href="#">NM_002676.1</a> |                               | phosphom cytoplasm     | mannose      |
| GI_4505916-S | 2082.8  | 1768.3 | 1845.4 | PMSCL2   | <a href="#">NM_002685.1</a> | PMSCL;PM-Scl                  | protein nucleolus      | rRNA         |
| GI_4505924-S | 185.7   | 200.8  | 187.8  | PNR      | <a href="#">NM_003967.1</a> |                               | G-protein integral to  | synaptic     |
| GI_4505930-S | 587.1   | 673.9  | 648.2  | POLB     | <a href="#">NM_002690.1</a> |                               | beta DNA nucleus       | DNA          |
| GI_4505932-S | 635.1   | 601    | 652.6  | POLD1    | <a href="#">NM_002691.1</a> | POLD                          | delta DNA nucleus      | response     |
| GI_4505936-S | 1228    | 1298   | 1359.9 | POLG     | <a href="#">NM_002693.1</a> | PEO;POLG1;POLGA               | gamma gamma            | DNA          |
| GI_4505940-S | 1384    | 1452.3 | 1414   | POLR2B   | <a href="#">NM_000938.1</a> | RPB2;POL2RB;hsRPB2;hRPB140    | DNA DNA-               | transcripti  |



|              |        |        |        |         |                             |                                      |              |              |              |
|--------------|--------|--------|--------|---------|-----------------------------|--------------------------------------|--------------|--------------|--------------|
| GI_4505946-S | 3247.6 | 3135.1 | 3171.1 | POLR2G  | <a href="#">NM_002696.1</a> | RPB7;hRPB19;hsRPB7                   | DNA-         | DNA-         | transcripti  |
| GI_4505948-S | 114.2  | 102.3  | 112.5  | POMC    | <a href="#">NM_000939.1</a> | MSH;POC;ACTH;CLIP                    | receptor     | soluble      | energy       |
| GI_4505952-S | 3251.9 | 4573.9 | 4609.9 | PON2    | <a href="#">NM_000305.1</a> |                                      | arylesterase | extracellul  |              |
| GI_4505954-S | 98.2   | 99.5   | 91.5   | POU1F1  | <a href="#">NM_000306.1</a> | PIT1;GHF-1                           | transcripti  | nucleus      | negative     |
| GI_4505958-S | 634.7  | 636    | 619    | POU2F2  | <a href="#">NM_002698.1</a> | OCT2;OTF2                            | transcripti  |              | humoral      |
| GI_4505962-S | 96.4   | 97.9   | 82.4   | POU3F4  | <a href="#">NM_000307.1</a> | BRN4;DFN3;OTF9;BRAIN-4               | transcripti  | nucleus      | hearing      |
| GI_4505964-S | 97.7   | 100    | 102.1  | POU4F3  | <a href="#">NM_002700.1</a> | BRN3C;DFNA15                         | DNA          | nucleus      | eye          |
| GI_4505988-S | 8781.8 | 6845.7 | 10507  | PPGB    | <a href="#">NM_000308.1</a> | GSL;CTSA;GLB2;NGBE;PPCA              | carboxype    | lysosome     | intracellula |
| GI_4506004-S | 1071.7 | 1223   | 1094.2 | PPP1CB  | <a href="#">NM_002709.1</a> | PPP1CD                               | protein      |              | cytokinesi   |
| GI_4506006-S | 6524.8 | 5864.9 | 4985.8 | PPP1CC  | <a href="#">NM_002710.1</a> | PPP1G                                | protein      |              | cytokinesi   |
| GI_4506012-S | 1078   | 1265.6 | 852    | PPP1R7  | <a href="#">NM_002712.1</a> | SDS22                                | protein      | cytoplasm    |              |
| GI_4506016-S | 6001.9 | 6625   | 6089.2 | PPP2CA  | <a href="#">NM_002715.1</a> | PP2CA                                | protein      | protein      | oncogene     |
| GI_4506026-S | 2469.8 | 2969.7 | 2980   | PPP4C   | <a href="#">NM_002720.1</a> | PP4;PPX                              | NF-          | centrosom    | microtubul   |
| GI_4506030-S | 1905.5 | 2181.5 | 2351.3 | PPT1    | <a href="#">NM_000310.1</a> | PPT;CLN1;INCL                        | palmitoyl-   | lysosome     | neurogene    |
| GI_4506056-A | 259.3  | 237.8  | 205.6  | PRKACB  | <a href="#">NM_002731.1</a> |                                      | cAMP-        | nucleus      | signal       |
| GI_4506056-I | 243.1  | 306.8  | 255.4  | PRKACB  | <a href="#">NM_002731.1</a> |                                      | cAMP-        | nucleus      | signal       |
| GI_4506064-S | 245.7  | 190.3  | 230.2  | PRKAR2B | <a href="#">NM_002736.1</a> | PRKAR2;RII-BETA                      | cAMP-        | cAMP-        | intracellula |
| GI_4506066-S | 246.3  | 271.5  | 232.9  | PRKCA   | <a href="#">NM_002737.1</a> | PKCA                                 | protein      | peripheral   | induction    |
| GI_4506074-S | 236    | 271.2  | 281    | PRKCM   | <a href="#">NM_002742.1</a> | PKD;PKCM;PKC-MU                      | atypical     | cytosol      | protein      |
| GI_4506076-S | 1527.7 | 1427.1 | 1410.2 | PRKCSH  | <a href="#">NM_002743.1</a> | PCLD;G19P1;AGE-R2                    | calcium      | intracellula | protein      |
| GI_4506102-S | 96.4   | 95.2   | 96.7   | PRKR    | <a href="#">NM_002759.1</a> | PKR;EIF2AK1                          | eukaryotic   | intracellula | negative     |
| GI_4506108-S | 101    | 98.4   | 93.3   | PRM1    | <a href="#">NM_002761.1</a> |                                      | DNA          | nucleoplas   | DNA          |
| GI_4506110-S | 93.7   | 102.5  | 97.3   | PRM2    | <a href="#">NM_002762.1</a> |                                      | DNA          | nucleoplas   | DNA          |
| GI_4506114-S | 112.1  | 114.3  | 102.5  | PROC    | <a href="#">NM_000312.1</a> |                                      | protein C    | extracellul  | proteolysis  |
| GI_4506116-S | 1021   | 455.5  | 333.7  | PROS1   | <a href="#">NM_000313.1</a> | PSA;PROS                             | endopepti    | extracellul  | blood        |
| GI_4506120-S | 98.8   | 103.9  | 106    | PROZ    | <a href="#">NM_003891.1</a> | PZ                                   | protein      | extracellul  | proteolysis  |
| GI_4506130-S | 1983.9 | 1681.2 | 1788.4 | PRPSAP1 | <a href="#">NM_002766.1</a> | PAP39                                | enzyme       |              | nucleobas    |
| GI_4506134-S | 506.2  | 497.4  | 434.3  | PRRG1   | <a href="#">NM_000950.1</a> | PRGP1                                | calcium      | extracellul  |              |
| GI_4506136-S | 127.5  | 171.9  | 151    | PRRG2   | <a href="#">NM_000951.1</a> | PRGP2                                | calcium      | extracellul  | regulation   |
| GI_4506138-S | 1108.8 | 1270   | 1675.9 | PCOLN3  | <a href="#">NM_002768.1</a> | PRSM1;KIAA0047                       | metallope    |              |              |
| GI_4506150-S | 104    | 118.7  | 115.7  | PRSS7   | <a href="#">NM_002772.1</a> | ENTK                                 | trypsin      | brush        | proteolysis  |
| GI_4506176-S | 485.5  | 570.5  | 488.7  | PSG7    | <a href="#">NM_002783.1</a> |                                      | plasma       | extracellul  | pregnancy    |
| GI_4506264-S | 145.5  | 452.8  | 617.7  | PTGS2   | <a href="#">NM_000963.1</a> | COX2;COX-2;PHS-2;PGG/HS;PGHS-2;hCox- | prostaglan   | membran      | physiologi   |
| GI_4506312-S | 188.4  | 160.3  | 209.4  | PTPRH   | <a href="#">NM_002842.1</a> | SAP-1                                | transmem     | integral to  | protein      |
| GI_4506328-S | 123.4  | 125.7  | 111.9  | PTPRZ1  | <a href="#">NM_002851.1</a> | PTPZ;HPTPZ;PTP18;PTPRZ;RPTPB         | transmem     | integral to  | central      |
| GI_4506330-S | 1350.1 | 1972.1 | 2247.4 | PTS     | <a href="#">NM_000317.1</a> | PTPS                                 | 6-           |              | tetrahydro   |
| GI_4506334-S | 89.1   | 94.1   | 93.2   | PVALB   | <a href="#">NM_002854.1</a> | D22S749                              | calcium      |              | muscle       |
| GI_4506338-S | 700.9  | 729.8  | 870.8  | PXF     | <a href="#">NM_002857.1</a> |                                      |              |              |              |
| GI_4506342-S | 1551.8 | 1675.8 | 1586.2 | PXMP3   | <a href="#">NM_000318.1</a> | PAF1;PEX2;PAF-1;PMP35;RNF72          |              | integral to  | protein-     |
| GI_4506344-S | 499.8  | 391.5  | 241.6  | PXN     | <a href="#">NM_002859.1</a> | FLJ23042                             | protein      | microtubul   | signal       |
| GI_4506354-S | 114.5  | 116.2  | 108.1  | PZP     | <a href="#">NM_002864.1</a> |                                      | serine       | cellular_co  | pregnancy    |
| GI_4506358-S | 333.2  | 398.6  | 366.4  | QDPR    | <a href="#">NM_000320.1</a> | DHPR;PKU2                            | 6,7-         |              | dihydrobio   |
| GI_4506364-S | 524.5  | 637    | 523.2  | RAB2    | <a href="#">NM_002865.1</a> | RAB2A                                | RAB small    | Golgi        | ER to        |
| GI_4506374-S | 932.4  | 827.6  | 926.6  | RAB7L1  | <a href="#">NM_003929.1</a> |                                      | RAB small    |              | small        |

|              |         |        |        |         |                             |                                       |             |                        |
|--------------|---------|--------|--------|---------|-----------------------------|---------------------------------------|-------------|------------------------|
| GI_4506382-I | 83      | 84.9   | 86.4   | RAD17   | <a href="#">NM_002873.1</a> | R24L;Rad24;HRAD17;RAD17Sp             | nucleus     | DNA                    |
| GI_4506400-S | 577.3   | 634.1  | 540.6  | RAF1    | <a href="#">NM_002880.1</a> |                                       | protein     | mitochond protein      |
| GI_4506404-S | 140.4   | 164.9  | 153.1  | RALB    | <a href="#">NM_002881.1</a> |                                       | GTP         | signal                 |
| GI_4506408-I | 755.9   | 718.5  | 724    | RANBP3  | <a href="#">NM_003624.1</a> | DKFZp586I1520                         | RAN         | nucleus                |
| GI_4506412-S | 954.6   | 875.3  | 710.8  | RAP1A   | <a href="#">NM_002884.1</a> | KREV1;KREV-1;SMGP21                   | GTPase      | signal                 |
| GI_4506414-S | 173.5   | 196.1  | 179.1  | RAP1GA1 | <a href="#">NM_002885.1</a> | RAP1GAP;KIAA0474                      | GTPase      | membran signal         |
| GI_4506418-S | 1393.7  | 1241.6 | 909.5  | RARA    | <a href="#">NM_000964.1</a> | RAR;NR1B1                             | retinoic    | nucleus oncogene       |
| GI_4506424-S | 99.8    | 90     | 92.9   | RARRES1 | <a href="#">NM_002888.1</a> | TIG1                                  |             | integral to negative   |
| GI_4506430-I | 126.1   | 116.9  | 98.5   | RASA1   | <a href="#">NM_002890.1</a> | GAP;PKWS;RASA;CMAVM;RASGAP;p120G      | Ras         | cell growth            |
| GI_4506434-S | 451.2   | 577.4  | 524.7  | RB1     | <a href="#">NM_000321.1</a> | RB                                    | tumor       | chromatin cell cycle   |
| GI_4506444-S | 2057.5  | 1944.1 | 1915.9 | RBM4    | <a href="#">NM_002896.1</a> | LARK                                  | RNA         | RNA                    |
| GI_4506448-S | 257.9   | 325.7  | 228.8  | RBMS2   | <a href="#">NM_002898.1</a> | SCR3                                  | RNA         | RNA                    |
| GI_4506452-S | 105.8   | 108    | 97.2   | RBP3    | <a href="#">NM_002900.1</a> | IRBP;RBPI;D10S64;D10S65;D10S66        | retinoid    | extracellul vision     |
| GI_4506454-S | 4166.1  | 5241   | 3399.3 | RCN1    | <a href="#">NM_002901.1</a> | RCN                                   | calcium     | endoplas               |
| GI_4506456-S | 1858.2  | 2603.7 | 2272.2 | RCN2    | <a href="#">NM_002902.1</a> | E6BP;ERC55;ERC-55                     | protein     | endoplas               |
| GI_4506458-S | 323.2   | 427    | 394.5  | RCV1    | <a href="#">NM_002903.1</a> |                                       | calcium     | vision                 |
| GI_4506462-S | 411.9   | 414.9  | 333.8  | RDH5    | <a href="#">NM_002905.1</a> | RDH1                                  | retinol     | membran vision         |
| GI_4506472-S | 157.9   | 170.3  | 184.8  | REL     | <a href="#">NM_002908.1</a> | C-Rel                                 | transcripti | nucleus transcripti    |
| GI_4506482-S | 187.5   | 197.6  | 226.1  | REV3L   | <a href="#">NM_002912.1</a> | POLZ;REV3                             | zeta DNA    | zeta DNA DNA           |
| GI_4506516-S | 214.4   | 338    | 287.1  | RGS2    | <a href="#">NM_002923.1</a> | G0S8                                  | GTPase      | peripheral regulation  |
| GI_4506520-S | 125.4   | 118    | 113.7  | RGS9    | <a href="#">NM_003835.1</a> | PERRS;RGS9L                           | GTPase      | peripheral regulation  |
| GI_4506522-S | 161.2   | 187    | 171    | RHAG    | <a href="#">NM_000324.1</a> | RH2;RH50A                             | blood       | integral to protein    |
| GI_4506524-S | 276.3   | 306.5  | 233.4  | RHBDL1  | <a href="#">NM_003961.1</a> | RRP;RHBDL                             | serine-     | membran signal         |
| GI_4506528-S | 181.6   | 196.5  | 176.7  | RHOK    | <a href="#">NM_002929.1</a> | RK;GRK1;GPRK1                         | G-protein-  | rhodopsin              |
| GI_4506532-S | 93.9    | 114.4  | 97.3   | RIT2    | <a href="#">NM_002930.1</a> | RIN;RIBA;ROC2                         | GTPase      | plasma synaptic        |
| GI_4506558-S | 1565.3  | 1394.8 | 1217.7 | ABCE1   | <a href="#">NM_002940.1</a> | RLI;OABP;ABC38;RNS4I;RNASELI          | ribonuclea  | membran response       |
| GI_4506562-S | 779.3   | 968    | 1092.5 | RNGTT   | <a href="#">NM_003800.1</a> | HCE;HCE1;hCAP;CAP1A                   | mRNA        | nucleus mRNA           |
| GI_4506566-S | 1078.6  | 899.8  | 960    | RNMT    | <a href="#">NM_003799.1</a> | MET;RG7MT1;KIAA0398                   | mRNA        | nucleus mRNA           |
| GI_4506580-S | 278.9   | 237.7  | 279.2  | RPGR    | <a href="#">NM_000328.1</a> | CRD;RP3;COD1;PCDX;RP15                | protein     | Golgi vision           |
| GI_4506588-S | 811.8   | 973.1  | 704.8  | RTCD1   | <a href="#">NM_003729.1</a> | RPC                                   | RNA-3'      | nucleoplas assembly    |
| GI_4506590-S | 96.3    | 108.6  | 109.3  | RPE65   | <a href="#">NM_000329.1</a> | LCA2;RP20                             | protein     | vitamin A              |
| GI_4506734-S | 426.5   | 426.3  | 593    | RPS6KA4 | <a href="#">NM_003942.1</a> | MSK2;RSKB;RSK-B                       | protein     | nucleus protein        |
| GI_4506736-S | 102.9   | 108.9  | 120.5  | RPS6KB1 | <a href="#">NM_003161.1</a> | S6K1;STK14A                           | protein     | signal                 |
| GI_4506738-S | 334.2   | 385.5  | 410.8  | RPS6KB2 | <a href="#">NM_003952.1</a> | p70S6Kb;P70-BETA                      | protein     | protein                |
| GI_4506742-S | 23202.7 | 21050  | 16409  | RPS8    | <a href="#">NM_001012.1</a> |                                       | structural  | cytosolic protein      |
| GI_4506752-S | 3310    | 3233.6 | 2943.3 | RUVBL1  | <a href="#">NM_003707.1</a> | ECP54;TIP49;NMP238                    | DNA         | nucleus recombina      |
| GI_4506756-S | 88.1    | 100.2  | 83.6   | RYR2    | <a href="#">NM_001035.1</a> | VTSIP                                 | calcium-    | integral to regulation |
| GI_4506760-S | 6531.4  | 9755.8 | 7897.4 | S100A10 | <a href="#">NM_002966.1</a> | 42C;P11;p10;GP11;ANX2L;CAL1L;CLP11;Ca | receptor    | signal                 |
| GI_4506762-S | 159.4   | 223.3  | 132.9  | S100A3  | <a href="#">NM_002960.1</a> | S100E                                 | calcium     |                        |
| GI_4506766-S | 119     | 122.4  | 112    | S100A5  | <a href="#">NM_002962.1</a> | S100D                                 | calcium     |                        |
| GI_4506782-S | 824.2   | 747.1  | 606.1  | SAP30   | <a href="#">NM_003864.1</a> |                                       | transcripti | histone                |
| GI_4506788-S | 2628.6  | 1518.7 | 1773.3 | SAT     | <a href="#">NM_002970.1</a> | SSAT                                  | diamine N-  |                        |
| GI_4506792-S | 394.5   | 357.6  | 561.4  | SCA1    | <a href="#">NM_000332.1</a> | ATX1;D6S504E                          |             | cytoplasm              |
| GI_4506794-S | 2217    | 1869.9 | 1589.1 | SCA2    | <a href="#">NM_002973.1</a> | ATX2;TNRC13                           | molecular   | cytoplasm pathogene    |

|              |        |        |        |         |                             |                                     |              |             |              |
|--------------|--------|--------|--------|---------|-----------------------------|-------------------------------------|--------------|-------------|--------------|
| GI_4506796-S | 95     | 103.6  | 84.8   | SCA7    | <a href="#">NM_000333.1</a> | OPCA3;ADCAII                        | molecular    | nucleus     | nuclear      |
| GI_4506810-S | 147.4  | 180.6  | 165.4  | SCN7A   | <a href="#">NM_002976.1</a> | SCN6A                               | voltage-     | voltage-    | sodium       |
| GI_4506812-S | 197.8  | 227.1  | 206.9  | SCN9A   | <a href="#">NM_002977.1</a> | PN1;NE-NA                           | voltage-     | voltage-    | sodium       |
| GI_4506816-S | 301.4  | 376.2  | 340.7  | SCNN1B  | <a href="#">NM_000336.1</a> | ENaCb;SCNEB;ENaCbeta                | amiloride-   | membran     | sodium       |
| GI_4506820-S | 130.4  | 140.8  | 121.8  | SCNN1G  | <a href="#">NM_001039.1</a> | PHA1;ENaCg;SCNEG;ENaCgamma          | sodium       | integral to | sodium       |
| GI_4506824-S | 100.6  | 100.1  | 87.3   | SCTR    | <a href="#">NM_002980.1</a> | SR                                  | secretin     | integral to | G-protein    |
| GI_4506832-S | 216.1  | 294.5  | 264.4  | CCL1    | <a href="#">NM_002981.1</a> | P500;SISe;TCA3;I-309;SCYA1          | chemokine    | extracellul | viral life   |
| GI_4506842-S | 85.4   | 133.4  | 96.6   | CCL3    | <a href="#">NM_002983.1</a> | MIP1A;SCYA3;LD78ALPHA;MIP-1-alpha   | chemokine    | soluble     | regulation   |
| GI_4506844-S | 238.6  | 272.9  | 250.5  | CCL4    | <a href="#">NM_002984.1</a> | ACT2;LAG1;Act-                      | cytokine     | extracellul | viral        |
| GI_4506850-S | 113.4  | 115.6  | 104.3  | CXCL6   | <a href="#">NM_002993.1</a> | GCP2;CKA-3;GCP-2;SCYB6              | chemokine    |             | chemotaxi    |
| GI_4506852-S | 142.8  | 158.6  | 145.4  | XCL1    | <a href="#">NM_002995.1</a> | LTN;ATAC;LPTN;SCM1;SCM-1;SCYC1;SCM- | cytokine     | extracellul | chemotaxi    |
| GI_4506856-S | 88.1   | 97.4   | 84.4   | CX3CL1  | <a href="#">NM_002996.1</a> | NTN;NTT;CXC3;CXC3C;SCYD1;ABCD-      | chemokine    | integral to | chemotaxi    |
| GI_4506864-S | 2599.4 | 2720.5 | 2269.7 | SDHD    | <a href="#">NM_003002.1</a> | PGL;CBT1;PGL1;SDH4                  | electron     | mitochond   | tricarboxyli |
| GI_4506866-S | 572.5  | 706.9  | 588.2  | SEC14L1 | <a href="#">NM_003003.1</a> | SEC14L                              | binding      | membran     | nonselecti   |
| GI_4506868-S | 99.4   | 113.7  | 94.5   | SECTM1  | <a href="#">NM_003004.1</a> | K12                                 | cytokine     | Golgi       | mesoderm     |
| GI_4506870-S | 93.3   | 109.5  | 105.5  | SELE    | <a href="#">NM_000450.1</a> | ELAM;ESEL;CD62E;ELAM1;LECAM2        | cell         | integral to | inflammat    |
| GI_4506880-S | 440.8  | 139.8  | 263.2  | SEMA5A  | <a href="#">NM_003966.1</a> | semF;SEMAF                          | receptor     | integral to | cell         |
| GI_4506890-S | 5540   | 5515.1 | 4522.2 | SET     | <a href="#">NM_003011.1</a> | 2PP2A;IGAAD;I2PP2A;PHAPII;TAF-IBETA | protein      | nucleus     | nucleoso     |
| GI_4506898-S | 5042   | 7152   | 6184.5 | SFRS2   | <a href="#">NM_003016.1</a> | SC35;PR264;SC-35;SRp30b             | pre-mRNA     | nucleus     | mRNA         |
| GI_4506910-S | 85.6   | 93.4   | 73     | SGCA    | <a href="#">NM_000023.1</a> | A2;ADL;DAG2;DMDA2;50-               |              | dystrophin- | muscle       |
| GI_4506916-S | 1513.9 | 7487.9 | 3595.1 | SGNE1   | <a href="#">NM_003020.1</a> | P7B2                                | GTP          | secretory   | neuropepti   |
| GI_4506922-S | 129.7  | 110.7  | 118.7  | SH2D1A  | <a href="#">NM_002351.1</a> | LYP;SAP;XLP;DSHP;EBVS;IMD5;XLPD;MTC | SH3/SH2      | cytoplasm   | cellular     |
| GI_4506924-S | 825.6  | 1279.1 | 1071   | SH3BGR  | <a href="#">NM_003022.1</a> | SH3BGR                              | SH3/SH2      |             |              |
| GI_4506928-S | 360.3  | 405.2  | 416.6  | SH3GL1  | <a href="#">NM_003025.1</a> | EEN;CNSA1;SH3P8;SH3D2B              |              | kinesin     | central      |
| GI_4506930-S | 118.3  | 123.3  | 109.5  | SH3GL2  | <a href="#">NM_003026.1</a> | CNSA2;SH3P4;EEN-B1;SH3D2A           |              | kinesin     | central      |
| GI_4506934-S | 193.9  | 223.2  | 234.6  | SHB     | <a href="#">NM_003028.1</a> |                                     | SH3/SH2      |             | intracellula |
| GI_4506944-S | 95.7   | 89.5   | 86.8   | SI      | <a href="#">NM_001041.1</a> |                                     | catalytic    | brush       | carbohydr    |
| GI_4506958-S | 113.2  | 120.1  | 109.8  | SIL     | <a href="#">NM_003035.1</a> |                                     |              |             | cell         |
| GI_4506960-S | 197.3  | 197.7  | 153.2  | SIP1    | <a href="#">NM_003616.1</a> | GEMIN2                              | pre-mRNA     | spliceoso   | mRNA         |
| GI_4506966-S | 211.2  | 233.9  | 230.8  | SKI     | <a href="#">NM_003036.1</a> | SKV                                 | molecular    | kinesin     | cell growth  |
| GI_4506968-S | 82.4   | 91.5   | 80.5   | SLAMF1  | <a href="#">NM_003037.1</a> | SLAM;CDw150                         | antigen      | integral to | positive     |
| GI_4506970-S | 98.6   | 102.1  | 84.8   | SLC10A1 | <a href="#">NM_003049.1</a> | NTCP;NTCP1                          | bile         | integral to | small        |
| GI_4506972-S | 116.6  | 140    | 122.6  | SLC10A2 | <a href="#">NM_000452.1</a> | ASBT;ISBT;NTCP2                     | bile         | integral to | small        |
| GI_4506976-S | 101.3  | 99.4   | 102    | SLC12A3 | <a href="#">NM_000339.1</a> | TSC;NCCT                            | sodium:ch    | membran     | small        |
| GI_4506978-S | 194    | 224    | 204.5  | SLC13A2 | <a href="#">NM_003984.1</a> | NADC1;NaDC-1                        | low affinity | membran     | small        |
| GI_4506986-S | 283.4  | 354.1  | 313.4  | SLC18A1 | <a href="#">NM_003053.1</a> | CGAT;VAT1;VMAT1                     |              |             |              |
| GI_4506990-S | 159.9  | 196.4  | 190.5  | SLC18A3 | <a href="#">NM_003055.1</a> | VACHT                               | acetylcholi  | secretory   | acetylcholi  |
| GI_4507010-S | 96.3   | 112.4  | 99.2   | SLC2A4  | <a href="#">NM_001042.1</a> | GLUT4                               | glucose      | membran     | glucose      |
| GI_4507012-S | 132.3  | 169.3  | 144.3  | SLC2A5  | <a href="#">NM_003039.1</a> | GLUT5                               | fructose     | integral to | fructose     |
| GI_4507016-S | 202.4  | 307.6  | 247.5  | SLC31A2 | <a href="#">NM_001860.1</a> | CTR2;COPT2;SLC13A2                  | copper ion   | integral to | copper ion   |
| GI_4507020-S | 102.8  | 109.6  | 81.2   | SLC4A1  | <a href="#">NM_000342.1</a> | DI;AE1;WD1;BND3;EPB3;CD233;EMPB3;RT | anion        | integral to | cell ion     |
| GI_4507024-S | 98.3   | 94.8   | 121    | SLC4A4  | <a href="#">NM_003759.1</a> | KNBC;NBC1;NBC2;pNBC;HNBC1;hhNMC;S   | sodium:bi    | integral to | small        |
| GI_4507030-S | 124.8  | 144.6  | 129.1  | SLC5A1  | <a href="#">NM_000343.1</a> | NAGT;SGLT1;D22S675                  | glucose:s    | integral to | sugar        |
| GI_4507032-S | 349.8  | 454.1  | 419.4  | SLC5A2  | <a href="#">NM_003041.1</a> | SGLT2                               | low-affinity | integral to | small        |

|              |         |        |        |        |                             |                                       |             |             |              |
|--------------|---------|--------|--------|--------|-----------------------------|---------------------------------------|-------------|-------------|--------------|
| GI_4507034-S | 110.9   | 118.6  | 108    | SLC5A5 | <a href="#">NM_000453.1</a> | NIS                                   | iodide      | integral to | small        |
| GI_4507038-S | 165.6   | 173.1  | 141.9  | SLC6A1 | <a href="#">NM_003042.1</a> | GAT1;GABATR;GABATHG                   | gamma-      | integral to | small        |
| GI_4507044-S | 247.1   | 294.3  | 266.9  | SLC6A6 | <a href="#">NM_003043.1</a> | TAUT                                  | taurine:so  | integral to | small        |
| GI_4507048-S | 82.1    | 88.9   | 80.4   | SLC7A2 | <a href="#">NM_003046.1</a> | ATRC2;CAT-2;HCAT2                     | basic       | membran     | small        |
| GI_4507052-S | 335.7   | 363.6  | 454.4  | SLC7A6 | <a href="#">NM_003983.1</a> |                                       |             |             |              |
| GI_4507060-S | 147     | 178.8  | 169    | SLIT1  | <a href="#">NM_003061.1</a> | MEGF4;SLIL1;SLIT3;Slit-1              | protein     | cellular_co | brain        |
| GI_4507062-S | 173.6   | 222.7  | 198.7  | SLN    | <a href="#">NM_003063.1</a> | MGC12301                              |             | smooth      | small        |
| GI_4507094-S | 274.4   | 294.5  | 292.3  | SMPD2  | <a href="#">NM_003080.1</a> | NSMASE                                | sphingom    | integral to | sphingom     |
| GI_4507102-S | 419.3   | 401.9  | 433.4  | SNAPC2 | <a href="#">NM_003083.1</a> | SNAP45;PTFdelta                       | transcripti | nucleus     | snRNA        |
| GI_4507104-S | 521.6   | 654.7  | 613.8  | SNAPC3 | <a href="#">NM_003084.1</a> | SNAP50;PTFbeta                        | DNA         | nucleus     | snRNA        |
| GI_4507106-S | 1524.9  | 1520.5 | 1127.1 | SNAPC4 | <a href="#">NM_003086.1</a> | SNAP190;FLJ13451;PTFalpha             | DNA         | nucleus     | snRNA        |
| GI_4507112-S | 206.5   | 231.1  | 202.3  | SNCG   | <a href="#">NM_003087.1</a> | SR;BCSG1                              |             | cytoplasm   | oncogene     |
| GI_4507114-S | 285.7   | 304.2  | 307.3  | FSCN1  | <a href="#">NM_003088.1</a> | SNL;p55                               | actin       | actin       | actin        |
| GI_4507120-S | 1234.7  | 1290.7 | 1021   | SNRPA1 | <a href="#">NM_003090.1</a> |                                       | small       | snRNP U2    | mRNA         |
| GI_4507126-S | 1311.1  | 1271.5 | 1201.1 | SNRPC  | <a href="#">NM_003093.1</a> |                                       | small       | snRNP U1    | mRNA         |
| GI_4507128-S | 3620.9  | 3465.7 | 2867.2 | SNRPE  | <a href="#">NM_003094.1</a> | SME                                   | small       | spliceoso   | mRNA         |
| GI_4507130-S | 2378    | 2477.3 | 2423.5 | SNRPF  | <a href="#">NM_003095.1</a> | SMF                                   | small       | spliceoso   | mRNA         |
| GI_4507150-S | 197.7   | 488.1  | 207.4  | SOD3   | <a href="#">NM_003102.1</a> |                                       | superoxid   | extracellul | superoxid    |
| GI_4507170-S | 31108.4 | 58234  | 36399  | SPARC  | <a href="#">NM_003118.1</a> | ON                                    | collagen    | extracellul | ossificatio  |
| GI_4507174-S | 296.9   | 378.6  | 327.7  | SPI1   | <a href="#">NM_003120.1</a> | OF;PU.1                               | transcripti | nucleus     | negative     |
| GI_4507176-S | 317.1   | 308    | 295.8  | SPIB   | <a href="#">NM_003121.1</a> | SPI-B                                 | RNA         | cytoplasm   | regulation   |
| GI_4507186-S | 206.9   | 232.9  | 219.3  | SPRR1B | <a href="#">NM_003125.1</a> | SPRR1;GADD33;CORNFIFIN                | structural  | intermedia  | epidermal    |
| GI_4507188-S | 120.4   | 114.3  | 110.4  | SPTA1  | <a href="#">NM_003126.1</a> | EL2                                   | actin       | spectrin    | actin        |
| GI_4507190-S | 265.5   | 448.6  | 327.1  | SPTAN1 | <a href="#">NM_003127.1</a> | (ALPHA)II-SPECTRIN                    | actin       | spectrin    | cell shape   |
| GI_4507194-I | 104     | 114.5  | 99.4   | SPTBN1 | <a href="#">NM_003128.1</a> | SPTB2                                 | actin       | spectrin    |              |
| GI_4507200-S | 374     | 421.6  | 586    | SRD5A1 | <a href="#">NM_001047.1</a> |                                       | electron    | microsom    | sex          |
| GI_4507204-S | 2106.4  | 1797.4 | 1533.6 | SRF    | <a href="#">NM_003131.1</a> |                                       | RNA         | nucleus     | signal       |
| GI_4507208-S | 10955.2 | 11926  | 11650  | SRM    | <a href="#">NM_003132.1</a> | SPS1;SRML1                            | spermidin   |             | spermidin    |
| GI_4507212-S | 1095.4  | 1237.6 | 1078.3 | SRP19  | <a href="#">NM_003135.1</a> |                                       | 7S RNA      | signal      | cotranslati  |
| GI_4507216-S | 5073.5  | 6054.6 | 4894.5 | SRP9   | <a href="#">NM_003133.1</a> | ALURBP                                | RNA         | signal      | regulation   |
| GI_4507224-S | 113.8   | 113.1  | 102.1  | SRY    | <a href="#">NM_003140.1</a> | TDF;TDY                               | DNA         | nucleus     | sex          |
| GI_4507230-S | 3470    | 3520.9 | 3201.4 | SSBP1  | <a href="#">NM_003143.1</a> | SSBP                                  | single-     | mitochond   | DNA          |
| GI_4507232-S | 142.5   | 162    | 119.5  | SOCS1  | <a href="#">NM_003745.1</a> | JAB;CIS1;SSI1;TIP3;CISH1;SSI-1;SOCS-1 | protein     | cytoplasm   | JAK-STAT     |
| GI_4507246-S | 169.9   | 140.9  | 150.2  | STAC   | <a href="#">NM_003149.1</a> |                                       |             | soluble     | intracellula |
| GI_4507250-S | 94.7    | 96.9   | 87.3   | STAR   | <a href="#">NM_000349.1</a> | STARD1                                | cholester   | mitochond   | steroid      |
| GI_4507260-S | 102.8   | 93.7   | 82.4   | STATH  | <a href="#">NM_003154.1</a> | STR                                   | protein     | extracellul | ossificatio  |
| GI_4507264-S | 7529.7  | 5914.8 | 9139.6 | STC1   | <a href="#">NM_003155.1</a> | STC                                   | glycopepti  | extracellul | response     |
| GI_4507266-S | 229.6   | 474.8  | 252    | STC2   | <a href="#">NM_003714.1</a> | STC-2;STCRP                           | glycopepti  | extracellul | response     |
| GI_4507272-S | 458.3   | 505.7  | 422.2  | AURKC  | <a href="#">NM_003160.1</a> | AIE2;AIK3;STK13                       | protein     | centrosom   | cytokinesi   |
| GI_4507276-S | 130.5   | 129.6  | 123.5  | NEK4   | <a href="#">NM_003157.1</a> | NRK2;STK2                             | protein     | nucleus     | protein      |
| GI_4507280-S | 119.7   | 142.9  | 127.3  | CDKL5  | <a href="#">NM_003159.1</a> | STK9                                  | protein     |             | protein      |
| GI_4507282-S | 134.1   | 160    | 145.8  | STRN   | <a href="#">NM_003162.1</a> | SG2NA                                 | calmoduli   | kinesin     | biological_  |
| GI_4507284-S | 1294.3  | 1267.7 | 1387.3 | STX10  | <a href="#">NM_003765.1</a> | SYN10;hsyn10                          | protein     | Golgi       | intracellula |
| GI_4507294-S | 283.7   | 267.5  | 280.4  | STX7   | <a href="#">NM_003569.1</a> |                                       | vesicle     | endosome    | post-Golgi   |

|              |        |        |        |          |                             |                                    |              |             |             |
|--------------|--------|--------|--------|----------|-----------------------------|------------------------------------|--------------|-------------|-------------|
| GI_4507296-S | 539.9  | 621.5  | 530.5  | STXBP1   | <a href="#">NM_003165.1</a> | UNC18;hUNC18;MUNC18-1              |              | insoluble   | Golgi to    |
| GI_4507308-A | 323.9  | 310.9  | 245.3  | SUPT3H   | <a href="#">NM_003599.1</a> | SPT3;SPT3L                         | RNA          | transcripti | regulation  |
| GI_4507310-S | 911    | 1188.8 | 842.5  | SUPT4H1  | <a href="#">NM_003168.1</a> | SPT4H;SUPT4H                       | transcripti  | nucleus     | chromatin   |
| GI_4507320-S | 309.7  | 386    | 367    | SUV39H1  | <a href="#">NM_003173.1</a> | SUV39H                             | methyltran   | nuclear     | establish   |
| GI_4507336-S | 149.2  | 170.5  | 144.5  | SYT5     | <a href="#">NM_003180.1</a> |                                    | transporte   | synaptic    | synaptic    |
| GI_4507344-S | 176.8  | 199.7  | 183.3  | TACR2    | <a href="#">NM_001057.1</a> | SKR;NK2R;NK2AR;TAC2R               | tachykinin   | integral to | tachykinin  |
| GI_4507356-S | 3888.5 | 5560.8 | 4758   | TAGLN2   | <a href="#">NM_003564.1</a> | HA1756;KIAA0120                    |              |             | muscle      |
| GI_4507362-S | 293.3  | 392.5  | 351.4  | TAL1     | <a href="#">NM_003189.1</a> | SCL;TCL5                           | DNA          |             | oncogene    |
| GI_4507368-S | 149.5  | 152.4  | 160    | TAT      | <a href="#">NM_000353.1</a> |                                    |              |             |             |
| GI_4507372-S | 539.6  | 710.1  | 681.2  | TBCC     | <a href="#">NM_003192.1</a> | CFC                                | co-          | microtubul  | post-       |
| GI_4507388-S | 827.1  | 908.4  | 835.9  | TCEB3    | <a href="#">NM_003198.1</a> | SIII;TCEB3A                        | protein      | nucleus     | regulation  |
| GI_4507396-A | 188.6  | 219.7  | 206.9  | TCF2     | <a href="#">NM_000458.1</a> | HNF2;LFB3;HNF1B;MODY5;VHNF1;HNF1be | DNA          | nucleus     | regulation  |
| GI_4507396-I | 117.3  | 137.5  | 115.6  | TCF2     | <a href="#">NM_000458.1</a> | HNF2;LFB3;HNF1B;MODY5;VHNF1;HNF1be | DNA          | nucleus     | regulation  |
| GI_4507398-S | 212.6  | 202.7  | 181.7  | TCF4     | <a href="#">NM_003199.1</a> | E2-2;ITF2;SEF2;SEF2-1;SEF2-1B      | RNA          | nucleus     | regulation  |
| GI_4507400-I | 2227.8 | 1755   | 1759.6 | TFAM     | <a href="#">NM_003201.1</a> | TCF6;MtTF1;mtTFA;TCF6L2            | transcripti  | mitochond   | transcripti |
| GI_4507410-S | 905.8  | 790.2  | 745    | TCOF1    | <a href="#">NM_000356.1</a> | MFD1;treacle                       | transporte   | nucleolus   | nucleocyto  |
| GI_4507424-S | 106.9  | 99.4   | 90.7   | TGDF1    | <a href="#">NM_003212.1</a> | CR;CRGF;CRIPTO                     | receptor     |             | signal      |
| GI_4507426-S | 1595.8 | 939.8  | 959    | TEAD4    | <a href="#">NM_003213.1</a> | RTEF1;TEF-3;EFTR-2;RTEF-1;TEFR-    | RNA          |             | muscle      |
| GI_4507428-S | 109.4  | 130.9  | 102.8  | TEC      | <a href="#">NM_003215.1</a> | PSCTK4                             | non-         |             | protein     |
| GI_4507432-S | 9576.5 | 8810.2 | 9459.2 | TEGT     | <a href="#">NM_003217.1</a> | BI-1                               |              | insoluble   | apoptosis   |
| GI_4507440-S | 117.4  | 129.6  | 114.7  | TFAP2A   | <a href="#">NM_003220.1</a> | AP-2;AP2TF;TFAP2                   | RNA          | nucleus     | ectoderm    |
| GI_4507446-S | 197.7  | 214.7  | 209.4  | TFAP4    | <a href="#">NM_003223.1</a> | AP-4                               | RNA          | nucleus     | regulation  |
| GI_4507450-S | 246.1  | 295.9  | 266.6  | TFF1     | <a href="#">NM_003225.1</a> | pS2;BCEI;HPS2;pNR-2;D21S21         | growth       |             | cell growth |
| GI_4507452-S | 126    | 135.6  | 127.9  | TFF3     | <a href="#">NM_003226.1</a> | ITF;HITF                           |              | extracellul | defense     |
| GI_4507456-S | 2811.2 | 4756.1 | 4425.7 | TFRC     | <a href="#">NM_003234.1</a> | TFR;CD71;TRFR                      | transferrin  | endosome    | iron ion    |
| GI_4507460-S | 642.1  | 1326.7 | 1799.3 | TGFA     | <a href="#">NM_003236.1</a> |                                    | protein-     | soluble     | cell        |
| GI_4507462-S | 184.9  | 262.7  | 224.3  | TGFB2    | <a href="#">NM_003238.1</a> |                                    | transformi   | extracellul | signal      |
| GI_4507464-S | 475    | 697.4  | 556.9  | TGFB3    | <a href="#">NM_003239.1</a> |                                    | transformi   |             | histogene   |
| GI_4507466-S | 8779.7 | 7520.6 | 6295.5 | TGFBI    | <a href="#">NM_000358.1</a> | CSD;CDB1;CDG2;CSD1;CSD2;CSD3;LCD1; | integrin     | extracellul | negative    |
| GI_4507470-S | 569.6  | 545    | 634.9  | TGFBR3   | <a href="#">NM_003243.1</a> |                                    | glycosami    | integral to | TGFbeta     |
| GI_4507474-S | 121.5  | 131    | 119.7  | TGM1     | <a href="#">NM_000359.1</a> | LI;LI1;TGK;ICR2;TGASE              | protein-     | membran     | protein     |
| GI_4507478-S | 192.3  | 237.7  | 206.3  | TGM4     | <a href="#">NM_003241.1</a> | TGP                                | acyltransf   | cellular_co | peptide     |
| GI_4507500-S | 363.9  | 470.6  | 434.7  | TIAM1    | <a href="#">NM_003253.1</a> |                                    | Rho          |             | oncogene    |
| GI_4507506-S | 700.5  | 624.5  | 850.4  | TIMELESS | <a href="#">NM_003920.1</a> | TIM;TIM1;hTIM                      | protein      | nucleus     | response    |
| GI_4507508-S | 9850.6 | 11188  | 9562.2 | TIMP1    | <a href="#">NM_003254.1</a> | EPA;EPO;HCI;CLGI;TIMP              | metalloen    | extracellul | positive    |
| GI_4507514-S | 237.6  | 280.1  | 246.1  | TIMP4    | <a href="#">NM_003256.1</a> |                                    | metalloen    | extracellul | biological_ |
| GI_4507518-S | 1509.3 | 2024.3 | 1737.1 | TK1      | <a href="#">NM_003258.1</a> |                                    | thymidine    | cytoplasm   | nucleobas   |
| GI_4507520-S | 8270.3 | 8762.3 | 9084.6 | TKT      | <a href="#">NM_001064.1</a> | TKT1                               | transketol   |             |             |
| GI_4507544-S | 849.5  | 878.4  | 922.8  | TM7SF1   | <a href="#">NM_003272.1</a> |                                    |              | membran     |             |
| GI_4507546-S | 303.9  | 301    | 261.9  | TM7SF2   | <a href="#">NM_003273.1</a> | ANG1                               | molecular    | cellular_co | biological_ |
| GI_4507552-S | 135.1  | 164    | 159.1  | TMOD1    | <a href="#">NM_003275.1</a> | TMOD;ETMOD;D9S57E                  | tropomyos    | cytoskelet  | cytoskelet  |
| GI_4507554-S | 341.2  | 375.3  | 378.6  | TMPO     | <a href="#">NM_003276.1</a> | TP;LAP2                            | lamin/chro   | nuclear     |             |
| GI_4507556-S | 162.6  | 189.5  | 169.1  | TNA      | <a href="#">NM_003278.1</a> | TN                                 | lectin [goid | extracellul | skeletal    |
| GI_4507610-S | 98.6   | 110.3  | 93.9   | TNK1     | <a href="#">NM_003985.1</a> |                                    | non-         |             | protein     |

|              |         |        |        |         |                             |                                   |                   |                        |
|--------------|---------|--------|--------|---------|-----------------------------|-----------------------------------|-------------------|------------------------|
| GI_4507612-S | 203.1   | 239.1  | 226.9  | TNKS    | <a href="#">NM_003747.1</a> | TIN1;PARPL;TINF1;TNKS1            | NAD ADP- telomere | telomeras              |
| GI_4507614-S | 111.7   | 112.7  | 106.8  | TNNC1   | <a href="#">NM_003280.1</a> | TNC;TNNC                          | calcium           | regulation             |
| GI_4507620-S | 95.9    | 85.5   | 93.6   | TNNI2   | <a href="#">NM_003282.1</a> | DA2B;FSSV;AMCD2B                  | actin             | regulation             |
| GI_4507626-S | 249.6   | 313.6  | 286.1  | TNNT2   | <a href="#">NM_000364.1</a> | CMH2;CMD1D                        |                   | troponin regulation    |
| GI_4507630-S | 88.3    | 91.5   | 90.2   | TNR     | <a href="#">NM_003285.1</a> |                                   | extracellul       | extracellul axon       |
| GI_4507640-S | 471.9   | 509.1  | 270.8  | TPD52L1 | <a href="#">NM_003287.1</a> | D53                               |                   | oncogene               |
| GI_4507650-S | 4973.3  | 6580.7 | 5140.3 | TPM4    | <a href="#">NM_003290.1</a> |                                   | structural        | muscle muscle          |
| GI_4507652-S | 121.4   | 113.7  | 107.3  | TPMT    | <a href="#">NM_000367.1</a> |                                   |                   |                        |
| GI_4507656-S | 158     | 158.5  | 138.3  | TPP2    | <a href="#">NM_003291.1</a> |                                   | tripeptidyl-      | cytoplasm proteolysis  |
| GI_4507658-S | 1130.3  | 1404.8 | 1289.7 | TPR     | <a href="#">NM_003292.1</a> |                                   |                   | nuclear protein-       |
| GI_4507668-S | 24187.9 | 22986  | 19946  | TPT1    | <a href="#">NM_003295.1</a> | HRF;p02;TCTP                      | molecular         | cytoplasm              |
| GI_4507670-S | 107.2   | 118.8  | 101.4  | CRISP2  | <a href="#">NM_003296.1</a> | TPX1;TSP1;GAPDL5;CRISP-2          |                   | extracellul            |
| GI_4507672-S | 277.9   | 310.7  | 225.3  | NR2C1   | <a href="#">NM_003297.1</a> | TR2;TR2-11                        | steroid           | nucleus regulation     |
| GI_4507676-S | 3911.5  | 6535.8 | 4408.5 | TRA1    | <a href="#">NM_003299.1</a> | ECGP;GP96;GRP94                   | heat              | endoplas response      |
| GI_4507680-S | 79.7    | 79.4   | 73.1   | TRHR    | <a href="#">NM_003301.1</a> |                                   | thyrotropin-      | integral to G-protein  |
| GI_4507686-S | 139.5   | 140.7  | 130.4  | TRPC3   | <a href="#">NM_003305.1</a> | TRP3                              | store-            | integral to phototrans |
| GI_4507688-S | 288.7   | 346.1  | 303.1  | TRPM2   | <a href="#">NM_003307.1</a> | KNP3;EREG1;TRPC7;LTRPC2           | calcium           | integral to calcium    |
| GI_4507690-S | 1330.3  | 1444.5 | 1513.6 | TRRAP   | <a href="#">NM_003496.1</a> | TR-AP;PAF400                      |                   | oncogene               |
| GI_4507700-S | 111.1   | 120.4  | 116.5  | TSHR    | <a href="#">NM_000369.1</a> | LGR3                              | thyroid-          | integral to positive   |
| GI_4507702-S | 540.5   | 624.2  | 514.1  | TSSC1   | <a href="#">NM_003310.1</a> |                                   | tumor             |                        |
| GI_4507710-S | 1275.7  | 1406.1 | 1322.3 | TTC1    | <a href="#">NM_003314.1</a> | TPR1                              | protein           | protein                |
| GI_4507712-S | 2901.1  | 2677.8 | 2484.9 | DNAJC7  | <a href="#">NM_003315.1</a> | TPR2;TTC2;DANJC7                  | protein           | protein                |
| GI_4507722-S | 101.4   | 96.8   | 96.4   | TTPA    | <a href="#">NM_000370.1</a> | AVED;TTP1                         | tocopherol        | cytosol small          |
| GI_4507724-S | 160.8   | 162.7  | 142.2  | TTR     | <a href="#">NM_000371.1</a> | PALB;TBPA;HsT2651                 | thyroid           | extracellul small      |
| GI_4507728-S | 642.1   | 1395.9 | 1208.8 | TUBB    | <a href="#">NM_001069.1</a> |                                   | structural        | cytoskelet             |
| GI_4507736-S | 114.3   | 114.8  | 111.3  | TULP2   | <a href="#">NM_003323.1</a> | TUBL2                             |                   | vision                 |
| GI_4507742-S | 91.4    | 81.1   | 94.7   | TXK     | <a href="#">NM_003328.1</a> | RLK;TKL;BTKL;PTK4;PSCTK5          | non-              | cytoplasm protein      |
| GI_4507744-S | 10247.9 | 11745  | 9793   | TXN     | <a href="#">NM_003329.1</a> | TRX                               | thioredoxi        | cell                   |
| GI_4507750-S | 1666.5  | 1951.5 | 1810.3 | TYMS    | <a href="#">NM_001071.1</a> | TS;TMS;TSase;HsT422               | methyltran        | deoxyribo              |
| GI_4507756-S | 222     | 257.4  | 237.9  | TYRP1   | <a href="#">NM_000550.1</a> | TRP;CAS2;CATB;GP75;TYRP;b-PROTEIN | monooxyg          | integral to melanin    |
| GI_4507810-S | 873.4   | 816.4  | 600.4  | UGCG    | <a href="#">NM_003358.1</a> | GCS                               | ceramide          | endoplas glucosylce    |
| GI_4507812-S | 836.5   | 1215.3 | 918.3  | UGDH    | <a href="#">NM_003359.1</a> | UDPGDH                            | UDP-              | UDP-                   |
| GI_4507814-S | 153.8   | 186.1  | 170.1  | UGT1A6  | <a href="#">NM_001072.1</a> | GNT1;HLUGP;UGT1F;HLUGP1;MGC29860  | glucurono         | microsom xenobiotic    |
| GI_4507818-S | 170.7   | 213.4  | 195.7  | UGT2B15 | <a href="#">NM_001076.1</a> | UGT2B8                            | UDP-              | microsom steroid       |
| GI_4507820-S | 95.3    | 98.1   | 99.3   | UGT2B17 | <a href="#">NM_001077.1</a> |                                   | UDP-              | microsom steroid       |
| GI_4507822-S | 109     | 113.9  | 104.9  | UGT2B11 | <a href="#">NM_001073.1</a> |                                   | UDP-              | microsom estrogen      |
| GI_4507824-S | 114.8   | 110    | 110.3  | UGT2B7  | <a href="#">NM_001074.1</a> | UGT2B9                            | UDP-              | microsom lipid         |
| GI_4507828-S | 127.8   | 151.4  | 148.5  | KLF7    | <a href="#">NM_003709.1</a> | UKLF                              | zinc ion          | regulation             |
| GI_4507830-S | 1304.3  | 1607.8 | 1820.3 | ULK1    | <a href="#">NM_003565.1</a> | UNC51                             | protein           | protein                |
| GI_4507832-S | 177.3   | 210.4  | 183.8  | UMOD    | <a href="#">NM_003361.1</a> | FJHN;HNFJ;MCKD2;ADMCKD2           | GPI-              | peripheral negative    |
| GI_4507834-S | 152.2   | 157.9  | 154.2  | UMPS    | <a href="#">NM_000373.1</a> | OPRT                              | orotate           | UMP                    |
| GI_4507840-S | 2542.7  | 2649.9 | 3199.7 | UQCRC1  | <a href="#">NM_003365.1</a> | D3S3191                           | ubiquinol-        | mitochond oxidative    |
| GI_4507842-S | 3279    | 3924.4 | 2627.1 | UQCRC2  | <a href="#">NM_003366.1</a> |                                   | ubiquinol-        | mitochond oxidative    |
| GI_4507846-S | 407.1   | 493.3  | 443.6  | USF2    | <a href="#">NM_003367.1</a> | FIP                               | RNA               | nucleus regulation     |

|               |         |        |        |            |                             |                           |             |             |              |
|---------------|---------|--------|--------|------------|-----------------------------|---------------------------|-------------|-------------|--------------|
| GI_4507848-S  | 340.8   | 331.8  | 381.8  | USP13      | <a href="#">NM_003940.1</a> | ISOT3;IsoT-3              | ubiquitin-  |             | deubiquiti   |
| GI_4507854-S  | 114.5   | 129    | 148.6  | USP5       | <a href="#">NM_003481.1</a> | ISOT                      | ubiquitin   | 26S         | deubiquiti   |
| GI_4507856-S  | 543.4   | 596.5  | 523.5  | USP7       | <a href="#">NM_003470.1</a> | TEF1;HAUSP                | ubiquitin-  | nucleus     | deubiquiti   |
| GI_4507858-S  | 732.2   | 962.9  | 835.3  | UTF1       | <a href="#">NM_003577.1</a> |                           | RNA         | nucleus     | regulation   |
| GI_4507868-S  | 7596.4  | 7881   | 7052.7 | VASP       | <a href="#">NM_003370.1</a> |                           | actin       | focal       | cell         |
| GI_4507878-S  | 5031.2  | 5077.6 | 4752.4 | VDAC1      | <a href="#">NM_003374.1</a> | PORIN;PORIN-31-HL         | apoptogen   | mitochond   | apoptotic    |
| GI_4507882-S  | 335.5   | 357.2  | 422.8  | VDR        | <a href="#">NM_000376.1</a> | NR111                     | vitamin D3  | nucleus     | signal       |
| GI_4507894-S  | 23083.4 | 19971  | 15309  | VIM        | <a href="#">NM_003380.1</a> |                           |             |             |              |
| GI_4507902-S  | 379.7   | 348.4  | 353.2  | VRK1       | <a href="#">NM_003384.1</a> |                           | protein     |             | protein      |
| GI_4507908-S  | 256.3   | 330.6  | 289.5  | WAS        | <a href="#">NM_000377.1</a> | THC;IMD2;WASP             | small       | actin       | actin        |
| GI_4507912-S  | 696.6   | 654.5  | 551.2  | WASF1      | <a href="#">NM_003931.1</a> | WAVE;SCAR1;WAVE1;KIAA0269 | actin       | cytoskelet  | cell         |
| GI_4507926-S  | 94.5    | 98.6   | 87.8   | WNT2       | <a href="#">NM_003391.1</a> | IRP;INT1L1                | extracellul | extracellul | developm     |
| GI_4507960-S  | 781.7   | 796.3  | 773.1  | ZFP36      | <a href="#">NM_003407.1</a> | TTP;GOS24;TIS11;NUP475    | single-     | nucleus     | mRNA         |
| GI_4507962-S  | 231.8   | 308.1  | 288.6  | ZFP37      | <a href="#">NM_003408.1</a> |                           | zinc ion    | nucleus     | regulation   |
| GI_4507964-S  | 152.8   | 158    | 138    | ZFX        | <a href="#">NM_003410.1</a> |                           | DNA         | nucleus     | regulation   |
| GI_4507982-S  | 410.2   | 354.4  | 391.4  | ZNF134     | <a href="#">NM_003435.1</a> | pHZ-15                    | transcripti | nucleus     | regulation   |
| GI_4507988-S  | 140.1   | 160    | 169.4  | ZNF137     | <a href="#">NM_003438.1</a> | pHZ-30                    | transcripti | nucleus     | regulation   |
| GI_4507992-S  | 104.5   | 106.7  | 108.9  | ZNF141     | <a href="#">NM_003441.1</a> | D4S90;pHZ-44              | specific    | nucleus     | embryoge     |
| GI_4507996-S  | 477.1   | 529.5  | 538.3  | ZNF151     | <a href="#">NM_003443.1</a> | MIZ1;pHZ-67               | protein     | nucleus     | oncogene     |
| GI_4508006-S  | 131.1   | 131.5  | 132.4  | ZNF174     | <a href="#">NM_003450.1</a> |                           | protein     | nucleus     | negative     |
| GI_4508008-S  | 139.8   | 134    | 114.8  | ZNF177     | <a href="#">NM_003451.1</a> |                           | DNA         | nucleus     | negative     |
| GI_4508014-S  | 196.3   | 161.4  | 161.1  | ZNF205     | <a href="#">NM_003456.1</a> | ZNF210                    | zinc ion    | nucleus     | regulation   |
| GI_4508016-S  | 3256.8  | 3465.3 | 3008.3 | ZNF207     | <a href="#">NM_003457.1</a> |                           | zinc ion    | nucleus     | regulation   |
| GI_4508018-S  | 133.2   | 142.1  | 128.2  | BSN        | <a href="#">NM_003458.1</a> | ZNF231                    | structural  | cytoskelet  | synaptic     |
| GI_4508020-S  | 1140.6  | 1128.6 | 1025.7 | ZNF259     | <a href="#">NM_003904.1</a> | ZPR1                      | protein     | nucleolus   | signal       |
| GI_4508026-S  | 95      | 77.4   | 77.2   | ZNF43      | <a href="#">NM_003423.1</a> | HTF6;KOX27;ZNF39L1        | DNA         | nucleus     | regulation   |
| GI_4508030-S  | 238.3   | 272.3  | 249.9  | ZNF74      | <a href="#">NM_003426.1</a> | Cos52;ZNF520;Zfp520       | RNA         | nucleus     | regulation   |
| GI_4508034-S  | 447     | 424.7  | 400.5  | ZNF7       | <a href="#">NM_003416.1</a> | KOX4;HF.16                | DNA         | nucleus     | developm     |
| GI_4508036-S  | 392.3   | 342.2  | 254.6  | ZNF84      | <a href="#">NM_003428.1</a> | HPF2                      | zinc ion    | nucleus     | regulation   |
| GI_4508038-S  | 94.5    | 84.4   | 101.8  | ZNF85      | <a href="#">NM_003429.1</a> | HPF4;HTF1                 | transcripti | nucleus     |              |
| GI_4508040-S  | 15225.8 | 16572  | 13401  | ZNF91      | <a href="#">NM_003430.1</a> | HPF7;HTF10                | zinc ion    | nucleus     | regulation   |
| GI_4508044-S  | 100     | 108.1  | 98.9   | ZP2        | <a href="#">NM_003460.1</a> | ZPA                       | coreceptor  | extracellul | binding of   |
| GI_45120095-S | 115.8   | 119    | 116.1  | BRODL      | <a href="#">NM_153252.2</a> | FLJ38568                  |             |             |              |
| GI_45120103-S | 142.4   | 150.3  | 133.8  | MGC70870   | <a href="#">NM_203481.1</a> |                           |             |             |              |
| GI_45120110-S | 551.1   | 508.4  | 573.7  | KBTBD2     | <a href="#">NM_015483.1</a> | BKLHD1                    | protein     |             |              |
| GI_45120112-S | 93.5    | 97.7   | 80.4   | DDHD1      | <a href="#">NM_030637.1</a> |                           | metal ion   |             | lipid        |
| GI_45120114-S | 700.7   | 415    | 311.6  | DKFZP434H1 | <a href="#">NM_015492.3</a> |                           |             |             |              |
| GI_45120116-S | 748     | 972.6  | 914.1  | KIAA0256   | <a href="#">NM_014701.1</a> |                           | structural  | ribosome    | protein      |
| GI_45120118-S | 159.8   | 176.3  | 174.3  | SAST       | <a href="#">NM_014975.1</a> | SAST170;KIAA0973          | protein     |             | protein      |
| GI_45120120-S | 236     | 282.1  | 255    | KIAA2028   | <a href="#">NM_172069.1</a> |                           | actin       | cytoskelet  |              |
| GI_45237192-S | 825.2   | 1092.3 | 1385.5 | KIAA0446   | <a href="#">NM_014655.1</a> |                           | transporte  | mitochond   | transport    |
| GI_45237196-S | 348.7   | 399.9  | 373.5  | CLG        | <a href="#">NM_022835.1</a> | FLJ00018;FLJ22458         |             |             |              |
| GI_45237199-S | 108     | 161.7  | 124.8  | SIPA1L2    | <a href="#">NM_020808.1</a> | KIAA1389                  | protein     |             | intracellula |
| GI_45237201-S | 122.5   | 125.8  | 126.5  | KIAA1456   | <a href="#">NM_020844.1</a> |                           | S-          |             |              |

|               |        |        |        |            |                             |                                      |             |             |             |
|---------------|--------|--------|--------|------------|-----------------------------|--------------------------------------|-------------|-------------|-------------|
| GI_45238579-S | 306    | 326.1  | 360.7  | FBXO13     | <a href="#">NM_022824.1</a> | DKFZp434C1715                        |             |             |             |
| GI_45238844-S | 338.3  | 412.2  | 366.3  | UCN3       | <a href="#">NM_053049.2</a> | SCP;SPC;UCNIII                       | hormone     |             |             |
| GI_45238846-S | 217.5  | 246.2  | 233.3  | SFN        | <a href="#">NM_006142.3</a> |                                      | protein     | extracellul | negative    |
| GI_45238847-S | 1631.2 | 1796.6 | 1522.1 | PPP3R1     | <a href="#">NM_000945.3</a> | CNB;CNB1;CALNB1                      | calcium     | calcineurin | biological_ |
| GI_45238848-S | 4784   | 5783.7 | 4157.7 | PABPC3     | <a href="#">NM_030979.2</a> | PABP3;PABPL3                         | poly(A)     | cytoplasm   | mRNA        |
| GI_45238850-I | 151.3  | 172.2  | 152.8  | MGC70863   | <a href="#">NM_203477.1</a> |                                      |             |             |             |
| GI_45238852-I | 161.6  | 150.8  | 149.6  | MGC70863   | <a href="#">NM_203302.2</a> |                                      |             |             |             |
| GI_45238853-S | 302.1  | 362.4  | 311.1  | MGC20410   | <a href="#">NM_138456.3</a> |                                      |             |             |             |
| GI_45238855-S | 162.1  | 168.4  | 155.2  | LOC150236  | <a href="#">NM_131915.2</a> |                                      |             |             |             |
| GI_45238856-S | 362.1  | 410.9  | 441.4  | LOC114928  | <a href="#">NM_138437.2</a> |                                      |             |             |             |
| GI_45238857-S | 186.4  | 237.1  | 233.3  | DKFZp686L2 | <a href="#">NM_019045.3</a> | MGC26781                             |             |             |             |
| GI_45238859-S | 363.7  | 348.3  | 363.4  | C9orf42    | <a href="#">NM_138333.2</a> | MGC17347                             |             |             |             |
| GI_45243468-S | 105.6  | 107.7  | 92.4   | RNASE2     | <a href="#">NM_002934.2</a> | EDN;RNS2                             | ribonuclea  | secretory   | RNA         |
| GI_45243500-S | 3202.1 | 3179.5 | 2582.2 | BCL2L13    | <a href="#">NM_015367.2</a> | MIL1;BCL-RAMBO                       | caspase     | mitochond   | caspase     |
| GI_45243506-S | 107.4  | 111.8  | 108.1  | RNASE3     | <a href="#">NM_002935.2</a> | ECP;RNS3                             | ribonuclea  | secretory   | RNA         |
| GI_45243513-A | 1312.1 | 864.1  | 1198.2 | ABCB9      | <a href="#">NM_019624.2</a> | TAPL;KIAA1520;EST122234              | ATP         | lysosome    | small       |
| GI_45243519-I | 201.2  | 180.3  | 216.5  | ABCB9      | <a href="#">NM_019625.2</a> | TAPL;KIAA1520;EST122234              | ATP         | lysosome    | small       |
| GI_45243523-I | 239.6  | 294.1  | 270.7  | ABCB9      | <a href="#">NM_203444.1</a> | TAPL;KIAA1520;EST122234              | ATP         | lysosome    | small       |
| GI_45243529-S | 81.5   | 92.4   | 80     | FLJ35775   | <a href="#">NM_152418.2</a> |                                      |             |             |             |
| GI_45243533-I | 210.5  | 222.5  | 202.6  | PCDH9      | <a href="#">NM_203487.1</a> |                                      | calcium     | membran     | homophili   |
| GI_45243537-A | 95.1   | 94.7   | 88.9   | PCDH9      | <a href="#">NM_020403.3</a> |                                      | calcium     | membran     | homophili   |
| GI_45243546-I | 102.6  | 81.3   | 97.9   | ACYP1      | <a href="#">NM_203488.1</a> | ACYPE                                | acylphosp   |             | phosphate   |
| GI_45243550-S | 179    | 183.9  | 178.3  | DLL3       | <a href="#">NM_016941.2</a> | SCDO1                                | Notch       | integral to | skeletal    |
| GI_45243553-S | 141.6  | 145.8  | 137.4  | DKFZP566K0 | <a href="#">NM_015605.4</a> |                                      | protein-    |             | protein     |
| GI_45267816-S | 249.1  | 284.7  | 276.5  | CEAL1      | <a href="#">NM_020219.2</a> | DKFZp547N157                         | DNA         | nucleus     | regulation  |
| GI_45267827-S | 93.6   | 102.5  | 99.7   | FLJ23865   | <a href="#">NM_203498.1</a> |                                      |             |             |             |
| GI_45267831-S | 558.1  | 562.9  | 607.6  | KIAA0971   | <a href="#">NM_014929.2</a> |                                      |             |             |             |
| GI_45267834-S | 186.9  | 239.2  | 215.4  | USP50      | <a href="#">NM_203494.1</a> |                                      |             |             |             |
| GI_45267838-S | 582    | 702    | 693.8  | KIAA1193   | <a href="#">NM_017550.1</a> |                                      | DNA         | nucleus     |             |
| GI_45269132-S | 100.2  | 95.3   | 100.1  | GCM1       | <a href="#">NM_003643.2</a> | GCMA;hGCMA                           | DNA         | nucleus     | embryoge    |
| GI_45269134-S | 91.4   | 99.8   | 92.7   | GP1BA      | <a href="#">NM_000173.2</a> | BSS;GP1B;CD42b;MGC34595              | thrombin    | integral to | blood       |
| GI_45269136-I | 100.7  | 99.8   | 101.1  | MFN1       | <a href="#">NM_033540.2</a> | FLJ20693;MGC41806                    | GTPase      | integral to | biological_ |
| GI_45269138-A | 1238.6 | 1586.7 | 1420.1 | MFN1       | <a href="#">NM_017927.2</a> | FLJ20693;MGC41806                    | GTPase      | integral to | biological_ |
| GI_45269140-S | 105    | 99.3   | 95.3   | MMRN1      | <a href="#">NM_007351.2</a> | ECM;MMRN;GPIa*;EMILIN4               |             | kinesin     | blood       |
| GI_45269142-S | 191.6  | 255.9  | 199.6  | CDH3       | <a href="#">NM_001793.3</a> | CDHP;HJMD;PCAD                       | cell        | integral to | cell        |
| GI_45269143-A | 523.8  | 569.8  | 521.1  | KEAP1      | <a href="#">NM_012289.3</a> | INrf2;MGC1114;MGC4407;MGC9454;KIAA01 | protein     |             | regulation  |
| GI_45269144-I | 301.1  | 369.7  | 328.2  | KEAP1      | <a href="#">NM_203500.1</a> | INrf2;MGC1114;MGC4407;MGC9454;KIAA01 | protein     |             | regulation  |
| GI_45269146-S | 104.8  | 113.3  | 104    | NELL1      | <a href="#">NM_006157.2</a> | NRP1;IDH3GL                          | structural  |             | neurogene   |
| GI_45269147-S | 103.2  | 121    | 119.6  | PMP2       | <a href="#">NM_002677.3</a> | P2;MP2;FABP8                         | lipid       | cytoplasm   | lipid       |
| GI_45269148-S | 128    | 216.2  | 96.7   | QPRT       | <a href="#">NM_014298.3</a> | QPRTase                              | nicotinate- |             | synaptic    |
| GI_45269150-S | 121.2  | 122.2  | 103.6  | RAPGEF3    | <a href="#">NM_006105.3</a> | EPAC;bcm910;MGC21410;CAMP-GEFI       | guanyl-     | cAMP-       | signal      |
| GI_45269153-S | 1916.3 | 2297.5 | 644.1  | S100A2     | <a href="#">NM_005978.3</a> | CAN19;S100L                          | calcium     | cellular_co | biological_ |
| GI_45269154-S | 321.8  | 454.8  | 426.6  | SEPHS1     | <a href="#">NM_012247.3</a> | SPS;SELD;SPS1;MGC4980                | GTP         |             | protein     |
| GI_45269155-S | 176.7  | 201.2  | 123    | SUHW1      | <a href="#">NM_080740.3</a> | 3'OY11.1                             | DNA         | nucleus     | regulation  |



|               |        |        |        |          |                             |                                        |            |             |              |
|---------------|--------|--------|--------|----------|-----------------------------|----------------------------------------|------------|-------------|--------------|
| GI_45331203-S | 250.7  | 284.5  | 271.1  | MAP4K1   | <a href="#">NM_007181.3</a> | HPK1                                   | protein    |             | activation   |
| GI_45331210-S | 420.2  | 539.1  | 427.9  | FLJ00060 | <a href="#">NM_033206.1</a> |                                        |            |             |              |
| GI_45331212-S | 357.9  | 475.6  | 663.5  | RANBP6   | <a href="#">NM_012416.1</a> |                                        |            |             |              |
| GI_45331214-S | 620.8  | 676.1  | 555.1  | LZTS2    | <a href="#">NM_032429.1</a> | LAPSER1;KIAA1813                       | copper,    |             | superoxid    |
| GI_45331216-S | 258.3  | 230.7  | 210.1  | ZNF526   | <a href="#">NM_133444.1</a> | MGC4267;KIAA1951                       |            |             |              |
| GI_45333882-S | 6588   | 8131.4 | 7209.5 | KBTBD6   | <a href="#">NM_152903.3</a> | DKFZp547E1912                          | protein    |             |              |
| GI_45333897-S | 247.5  | 438.7  | 266.4  | FLJ90022 | <a href="#">NM_153690.4</a> |                                        |            |             |              |
| GI_45333908-I | 108.1  | 132.7  | 113    | COMMD6   | <a href="#">NM_203497.1</a> | Acrg                                   |            |             |              |
| GI_45333915-S | 141.8  | 141.8  | 144.3  | C20orf85 | <a href="#">NM_178456.2</a> | ba196N14.1                             |            |             |              |
| GI_45333920-S | 475.7  | 528.3  | 496.5  | ASB8     | <a href="#">NM_024095.3</a> | MGC5540;PP14212;FLJ21255               |            |             | intracellula |
| GI_45356148-S | 436.1  | 445.5  | 536.7  | FBXO23   | <a href="#">NM_130465.1</a> | FBX23;MGC14859                         | ubiquitin  | ubiquitin   | ubiquitin-   |
| GI_45356150-S | 346.3  | 318.6  | 408.8  | KIAA0056 | <a href="#">NM_015261.1</a> |                                        | DNA        | nucleus     | electron     |
| GI_45356742-S | 136.5  | 125.5  | 126.1  | SET8     | <a href="#">NM_020382.3</a> | SET07                                  |            |             |              |
| GI_45359830-A | 98.2   | 98.3   | 95.9   | CACNB2   | <a href="#">NM_000724.2</a> | MYSB;CACNLB2                           | voltage-   | voltage-    | neuromus     |
| GI_45359833-I | 111.6  | 120.1  | 107    | CACNB2   | <a href="#">NM_201570.1</a> | MYSB;CACNLB2                           | voltage-   | voltage-    | neuromus     |
| GI_45359839-I | 122.3  | 120.9  | 107.9  | CACNB2   | <a href="#">NM_201590.1</a> | MYSB;CACNLB2                           | voltage-   | voltage-    | neuromus     |
| GI_45359844-S | 874.2  | 1014.7 | 930.1  | G3BP2    | <a href="#">NM_012297.3</a> |                                        | protein    | cytoplasm   | cytoplasmic  |
| GI_45359851-S | 534.1  | 392.4  | 406.7  | GCLC     | <a href="#">NM_001498.2</a> | GCS;GLCL;GLCLC                         | glutamate- |             | glutamate    |
| GI_45359854-S | 871.9  | 860.8  | 933.4  | GOLGA4   | <a href="#">NM_002078.3</a> | GCP2;GOLG;p230;golgin 245              |            | peripheral  | vesicle-     |
| GI_45359857-S | 2170.4 | 2386   | 2614.1 | GRB2     | <a href="#">NM_002086.3</a> | ASH;Grb3-3;EGFRBP-GRB2                 | SH3/SH2    |             | epidermal    |
| GI_45359860-S | 3384.7 | 5182.9 | 4488.5 | POLR2L   | <a href="#">NM_021128.3</a> | RPB10;RPABC5;RPB7.6;hRPB7.6;hsRPB10    | DNA-       | DNA-        | regulation   |
| GI_45359861-S | 2920.5 | 3686.7 | 2569   | PSMA2    | <a href="#">NM_002787.3</a> | MU;HC3;PSC2;PMSA2                      | peptidase  | 26S         | ubiquitin-   |
| GI_45359864-S | 111.2  | 112    | 106.2  | MMP20    | <a href="#">NM_004771.3</a> | MMP-20                                 | zinc ion   | extracellul | proteolysis  |
| GI_45359866-S | 128.3  | 155    | 230.9  | NAP1L3   | <a href="#">NM_004538.3</a> | MB20;NPL3;MGC26312                     | DNA        | chromatin   | nucleoso     |
| GI_45359869-S | 104.1  | 110.4  | 92.9   | NTF3     | <a href="#">NM_002527.3</a> | NT3;HDNF;NGF-2                         | receptor   |             | anti-        |
| GI_45387924-S | 164.2  | 170.2  | 173    | UNQ430   | <a href="#">NM_205545.1</a> |                                        |            |             |              |
| GI_45387928-S | 165.3  | 200.4  | 180.2  | ALS2CR16 | <a href="#">NM_205543.1</a> |                                        |            |             |              |
| GI_45387944-S | 112.8  | 128.8  | 117    | KIAA1228 | <a href="#">NM_020728.1</a> |                                        |            |             |              |
| GI_45387946-S | 233.1  | 303    | 222.7  | MGC9718  | <a href="#">NM_021061.1</a> |                                        | DNA        | nucleus     | regulation   |
| GI_45387948-S | 1004.3 | 1133   | 891.9  | KIAA1972 | <a href="#">NM_133368.1</a> |                                        |            |             |              |
| GI_45387950-S | 241    | 258.3  | 226.3  | MGC3040  | <a href="#">NM_023943.1</a> |                                        | transporte | membran     | transport    |
| GI_45387954-S | 2550.4 | 2840.4 | 2283.7 | QIL1     | <a href="#">NM_205767.1</a> |                                        |            |             |              |
| GI_45387956-S | 77.3   | 72.3   | 75.7   | CD164L1  | <a href="#">NM_020404.2</a> | TEM1                                   | sugar      | extracellul | biological_  |
| GI_45387957-S | 1069.8 | 870.5  | 719.9  | KIAA0649 | <a href="#">NM_014811.3</a> |                                        |            |             |              |
| GI_45433494-S | 156.9  | 193.3  | 154.8  | ARHGAP20 | <a href="#">NM_020809.1</a> | KIAA1391                               |            |             | neuropepti   |
| GI_45433498-S | 412.6  | 453.8  | 460.3  | ZDHHC18  | <a href="#">NM_032283.1</a> | DKFZp667O2416                          | zinc ion   | integral to | regulation   |
| GI_45433500-S | 130    | 154.7  | 121.5  | EMILIN3  | <a href="#">NM_052846.1</a> | EMILIN5;C20orf130;dJ620E11.4;DKFZp434A |            | extracellul |              |
| GI_45433512-S | 434.6  | 415.5  | 336.9  | LOC93622 | <a href="#">NM_138699.2</a> |                                        | DNA        | nucleus     | regulation   |
| GI_45433538-S | 1407.4 | 1730.7 | 1666.8 | TIMM23   | <a href="#">NM_006327.2</a> | TIM23                                  | protein    | mitochond   | mitochond    |
| GI_45433541-S | 125.9  | 132.4  | 125.4  | R30953_1 | <a href="#">NM_019612.2</a> |                                        |            |             |              |
| GI_45433544-S | 329.8  | 355.2  | 351.1  | KIAA0460 | <a href="#">NM_015203.2</a> |                                        |            |             |              |
| GI_45433545-S | 120.5  | 147.6  | 136.4  | KCNS2    | <a href="#">NM_020697.2</a> | KV9.2                                  | voltage-   | voltage-    | cation       |
| GI_45433546-S | 156.9  | 157.9  | 155.1  | CASKIN2  | <a href="#">NM_020753.2</a> | FLJ21609;KIAA1139                      |            |             |              |
| GI_45433547-S | 137.1  | 132.6  | 131.7  | SLC16A10 | <a href="#">NM_018593.3</a> | TAT1;PRO0813                           |            |             |              |

|               |        |        |        |          |                             |                                     |              |              |             |
|---------------|--------|--------|--------|----------|-----------------------------|-------------------------------------|--------------|--------------|-------------|
| GI_45433549-S | 189.2  | 211.8  | 222    | DSCR9    | <a href="#">NM_148675.2</a> | molecular                           | cellular_co  | biological_  |             |
| GI_45433550-S | 67.5   | 75.1   | 72.9   | AKAP28   | <a href="#">NM_178813.4</a> | kinase                              |              |              |             |
| GI_45433551-S | 135.7  | 177.7  | 158.6  | GPR133   | <a href="#">NM_198827.2</a> | PGR25;DKFZp434B1272                 | G-protein    | membran      | neuropepti  |
| GI_45433553-S | 168.5  | 129.6  | 127    | FLJ37078 | <a href="#">NM_153043.3</a> | FLJ35271                            | DNA          | nucleus      | regulation  |
| GI_45439300-A | 200.2  | 221    | 195.6  | ZNF238   | <a href="#">NM_006352.3</a> | RP58;TAZ-1;C2H2-171                 | protein      | nuclear      | chromoso    |
| GI_45439301-I | 97.9   | 89.2   | 89.4   | ZNF238   | <a href="#">NM_205768.1</a> | RP58;TAZ-1;C2H2-171                 | protein      | nuclear      | chromoso    |
| GI_45439305-S | 4592.3 | 4580.5 | 3948.3 | DARS     | <a href="#">NM_001349.2</a> |                                     | aspartate-   | soluble      | aspartyl-   |
| GI_45439310-I | 689.2  | 407.7  | 312.6  | PPIA     | <a href="#">NM_203430.1</a> | CYPA;CYPH;MGC12404                  | protein      |              | viral       |
| GI_45439315-I | 325.3  | 389.6  | 234.4  | PPIE     | <a href="#">NM_203456.1</a> | CYP-33;MGC3736                      | cyclophilin  | nucleus      | protein     |
| GI_45439319-S | 898.7  | 1563.9 | 1205.5 | PPIC     | <a href="#">NM_000943.4</a> | CYPC;MGC3673                        | cyclospori   | cytoplasm    | signal      |
| GI_45439320-S | 689.6  | 853.3  | 630    | PPID     | <a href="#">NM_005038.2</a> | CYPD;CYP-40;MGC33096                | cyclophilin  |              | protein     |
| GI_45439321-S | 1152.6 | 1149.2 | 1378.3 | PPIF     | <a href="#">NM_005729.3</a> | CYP3                                | peptidyl-    | mitochond    | protein     |
| GI_45439322-S | 906.1  | 1015.9 | 908.1  | PPIH     | <a href="#">NM_006347.3</a> | CYPH;CYP-20;MGC5016;USA-CYP;SnuCyp- | cyclophilin  | spliceoso    | snRNP       |
| GI_45439323-A | 136.9  | 154.8  | 140.4  | PPL13    | <a href="#">NM_020129.2</a> | MGC22235;CLC2;LGALS14               | lectin [goid |              |             |
| GI_45439324-I | 98     | 114.8  | 116.3  | PPL13    | <a href="#">NM_203471.1</a> | MGC22235;CLC2;LGALS14               | lectin [goid |              |             |
| GI_45439326-S | 147.2  | 132.5  | 97.3   | PPL      | <a href="#">NM_002705.3</a> | KIAA0568                            | structural   | cytoskelet   | cell shape  |
| GI_45439328-S | 220.7  | 565.8  | 803.5  | PPN      | <a href="#">NM_022825.2</a> | MG61;PORC;MGC29687                  |              |              |             |
| GI_45439340-S | 269.2  | 228.9  | 270.1  | PPOX     | <a href="#">NM_000309.2</a> | VP;PPO;MGC8485                      | protoporp    | mitochond    | heme        |
| GI_45439341-A | 368.2  | 394.3  | 376.9  | PPIL5    | <a href="#">NM_152329.3</a> | LRR-1;4-1BBLRR;MGC20689             |              |              |             |
| GI_45439343-I | 126.1  | 133.6  | 135    | PPIL5    | <a href="#">NM_203466.1</a> | LRR-1;4-1BBLRR;MGC20689             |              |              |             |
| GI_45439347-I | 3085.2 | 3394.9 | 3046.8 | SELS     | <a href="#">NM_018445.4</a> | SBBI8;MGC2553;AD-015                |              | integral to  |             |
| GI_45439348-I | 191.3  | 186.7  | 156.2  | SELS     | <a href="#">NM_203472.1</a> | SBBI8;MGC2553;AD-015                |              | integral to  |             |
| GI_45439350-S | 1070.3 | 1822.8 | 1392.3 | SEPX1    | <a href="#">NM_016332.2</a> | SELR;SELX;MGC3344;HSPC270           | molecular    | cellular_co  | biological_ |
| GI_45439351-S | 132.9  | 155.5  | 137.4  | SOCS3    | <a href="#">NM_003955.3</a> | CIS3;Cish3;SSI-3;SOCS-3;MGC71791    | protein      |              | JAK-STAT    |
| GI_45439353-S | 5709.5 | 3621.9 | 3441   | TCEA1    | <a href="#">NM_006756.2</a> | SII;TCEA;TF2S;GTF2S;TFIIS           | general      | nucleus      | regulation  |
| GI_45439356-S | 219.7  | 252    | 218.7  | TCEB3B   | <a href="#">NM_016427.2</a> | HsT832;TCEB3L;elongin A2            | transcripti  | nucleus      | transcripti |
| GI_45439358-S | 374.4  | 427.5  | 317.2  | TRIO     | <a href="#">NM_007118.2</a> |                                     | protein      | peripheral   | transmem    |
| GI_45439360-S | 102.6  | 92     | 81.9   | CALCB    | <a href="#">NM_000728.3</a> | CALC2;CGRP2;CGRP-II                 | neuropepti   | soluble      | calcium     |
| GI_45439361-S | 256.7  | 377.7  | 368.6  | DOCK5    | <a href="#">NM_024940.4</a> |                                     |              |              |             |
| GI_45439363-S | 169.4  | 199.5  | 186.2  | EPHA4    | <a href="#">NM_004438.3</a> | SEK;HEK8;TYRO1                      | transmem     | integral to  | signal      |
| GI_45439364-S | 196.9  | 206.6  | 219.2  | FLJ22529 | <a href="#">NM_024789.2</a> |                                     |              |              |             |
| GI_45439366-S | 454    | 565.9  | 469.1  | GJA12    | <a href="#">NM_020435.2</a> | Cx47;CX46.6                         | connexon     | integral to  | cell        |
| GI_45439368-S | 533.7  | 586.7  | 422.2  | IER5     | <a href="#">NM_016545.3</a> | SBBI48                              |              |              |             |
| GI_45439369-S | 162.9  | 192.4  | 164.3  | KIAA1361 | <a href="#">NM_020791.1</a> | MARKK;FLJ14314                      | ATP          |              | protein     |
| GI_45439371-S | 105.6  | 120.9  | 122.5  | WNT4     | <a href="#">NM_030761.3</a> | WNT-4                               | extracellul  | extracellul  | developm    |
| GI_45446739-S | 193.7  | 232.2  | 230.9  | ABCA2    | <a href="#">NM_001606.3</a> | ABC2                                | ATP          | integral to  | small       |
| GI_45446741-S | 93.5   | 102.2  | 188.5  | AKR1C2   | <a href="#">NM_001354.4</a> | DD;DD2;BABP;DDH2;HBAB;HAKRD;MCDR2   | bile acid    |              | canalicular |
| GI_45446742-S | 1567.3 | 1564.4 | 1282.1 | DDX42    | <a href="#">NM_007372.2</a> | RHELP;RNAHP;SF3b125                 | nucleic      |              |             |
| GI_45446748-S | 132.8  | 144.7  | 131.2  | KIF5A    | <a href="#">NM_004984.2</a> | NKHC;MY050;SPG10;D12S1889           | adenosine    | kinesin      | microtubul  |
| GI_45446750-S | 108.9  | 130.6  | 124.9  | MAGEB3   | <a href="#">NM_002365.3</a> |                                     | tumor        | nucleus      | regulation  |
| GI_45446751-S | 78.8   | 85.9   | 92.9   | AQP8     | <a href="#">NM_001169.2</a> |                                     | water        | integral to  | water       |
| GI_45446753-S | 97.4   | 99.3   | 101.5  | CAPN11   | <a href="#">NM_007058.2</a> |                                     | calpain      | intracellula | proteolysis |
| GI_45447089-I | 127.8  | 169.4  | 154.1  | GMPPA    | <a href="#">NM_205847.1</a> |                                     | nucleotidyl  |              | biosynthes  |
| GI_45504345-S | 77.5   | 88.3   | 88.5   | OR2K2    | <a href="#">NM_205859.1</a> | OR2AR1P;HTPCRH06;HSHTPCRH06         |              |              |             |

|               |        |        |        |            |                             |                                     |             |                       |
|---------------|--------|--------|--------|------------|-----------------------------|-------------------------------------|-------------|-----------------------|
| GI_45504347-S | 155.4  | 172.2  | 159.5  | FBI4       | <a href="#">NM_205857.1</a> |                                     |             |                       |
| GI_45504350-S | 229.3  | 262.1  | 241.7  | UNQ1940    | <a href="#">NM_205855.1</a> |                                     |             |                       |
| GI_45504352-S | 94     | 94.9   | 89.4   | LOC389852  | <a href="#">NM_205856.1</a> | UNQ6288;dJ54B20.3                   |             |                       |
| GI_45504354-S | 238.9  | 270.7  | 249.2  | MUSTN1     | <a href="#">NM_205853.1</a> | Mustang                             |             |                       |
| GI_45504356-S | 108.6  | 113.9  | 111.2  | UNQ541     | <a href="#">NM_205854.1</a> |                                     |             |                       |
| GI_45504360-S | 145.9  | 153.1  | 148.9  | UNQ5782    | <a href="#">NM_205852.1</a> |                                     |             |                       |
| GI_45504362-S | 198    | 222.3  | 209.4  | FLJ35700   | <a href="#">NM_205851.1</a> |                                     |             |                       |
| GI_45504368-S | 118.3  | 139.9  | 120.4  | SLC24A5    | <a href="#">NM_205850.1</a> | JSX;NCKX5                           |             |                       |
| GI_45504370-S | 99     | 106.9  | 108.1  | FAM9B      | <a href="#">NM_205849.1</a> |                                     |             |                       |
| GI_45504375-S | 126.2  | 143.7  | 141.9  | SYT6       | <a href="#">NM_205848.1</a> |                                     |             |                       |
| GI_45504379-S | 252.2  | 281.5  | 278.4  | JMJD2B     | <a href="#">NM_015015.1</a> | KIAA0876                            | DNA         | nucleus regulation    |
| GI_45504385-S | 194.3  | 248.2  | 222.6  | OR2B6      | <a href="#">NM_012367.1</a> | OR2B1;OR2B5;OR2B1P;OR2B6P;OR5-      | olfactory   | integral to G-protein |
| GI_45504399-S | 229.3  | 214.9  | 196.4  | FLJ20509   | <a href="#">NM_017851.2</a> |                                     |             |                       |
| GI_45505128-S | 287.4  | 355    | 360.3  | TAO1       | <a href="#">NM_004783.2</a> | PSK;TAO2;KIAA0881                   | protein     | cytoplasmic protein   |
| GI_45505129-S | 283.5  | 347.2  | 314.3  | TAO1       | <a href="#">NM_016151.2</a> | PSK;TAO2;KIAA0881                   | protein     | cytoplasmic protein   |
| GI_45505131-S | 147.7  | 144.4  | 563.6  | SPINK1     | <a href="#">NM_003122.2</a> | PCTT;PSTI;TATI                      | endopepti   |                       |
| GI_45505133-S | 158.5  | 182.3  | 171.8  | SENP1      | <a href="#">NM_014554.2</a> |                                     | endopepti   | nucleus proteolysis   |
| GI_45505136-S | 155.8  | 165.4  | 138.2  | PODN       | <a href="#">NM_153703.3</a> | PCAN;SLRR5A;MGC24995                |             |                       |
| GI_45505138-S | 334.4  | 389.8  | 365    | PIK3AP1    | <a href="#">NM_152309.2</a> | BCAP;FLJ35564                       | kinase      |                       |
| GI_45505140-S | 93.4   | 113.8  | 99.8   | NPR3       | <a href="#">NM_000908.2</a> | NPRC;ANPRC                          | receptor    | integral to skeletal  |
| GI_45505141-A | 119.4  | 114.1  | 91.4   | NR5A2      | <a href="#">NM_003822.3</a> | B1F;CPF;FTF;B1F2;HB1F;LRH-1;FTZ-    | transcripti | nucleus pathogene     |
| GI_45505142-S | 119.2  | 1178.8 | 466.8  | NMB        | <a href="#">NM_021077.3</a> | MGC2277;MGC3936;MGC17211            | peptide     | soluble signal        |
| GI_45505146-S | 455.6  | 388    | 398.5  | NJMU-R1    | <a href="#">NM_022344.2</a> |                                     | molecular   | cellular_co spermatog |
| GI_45505148-A | 272.4  | 278.4  | 279.8  | NFIC       | <a href="#">NM_005597.2</a> | CTF;NFI;CTF5;NF-I;MGC20153          | transcripti | nucleus transcripti   |
| GI_45505150-I | 122.4  | 148.6  | 135    | NFIC       | <a href="#">NM_205843.1</a> | CTF;NFI;CTF5;NF-I;MGC20153          | transcripti | nucleus transcripti   |
| GI_45505152-S | 5703.7 | 5039.1 | 5124.1 | NCKAP1     | <a href="#">NM_013436.3</a> | NAP1;NAP125;MGC8981;KIAA0587        |             | integral to central   |
| GI_45505153-A | 308.2  | 293.3  | 266.7  | MGC21644   | <a href="#">NM_138492.4</a> |                                     |             |                       |
| GI_45505153-I | 152.5  | 166.8  | 156.8  | MGC21644   | <a href="#">NM_138492.4</a> |                                     |             |                       |
| GI_45505154-S | 997.5  | 1164.2 | 1077.4 | MOKA       | <a href="#">NM_030793.3</a> | SP329                               | receptor    |                       |
| GI_45505158-S | 77.4   | 78.6   | 69.1   | MGC21394   | <a href="#">NM_205841.1</a> | UNQ844                              |             |                       |
| GI_45505160-I | 111.5  | 134.7  | 111.3  | LST1       | <a href="#">NM_205837.1</a> | B144;LST-1;D6S49E                   | defense/i   | integral to cellular  |
| GI_45505162-A | 296.1  | 383.9  | 373    | LISCH7     | <a href="#">NM_015925.4</a> | MGC10659;MGC48312                   | receptor    | metabolis             |
| GI_45505166-S | 181    | 268.7  | 202.7  | IGSF1      | <a href="#">NM_001555.2</a> | IGCD1;IGDC1;INHBP;KIAA0364;MGC75490 | cell        | integral to cell      |
| GI_45505170-S | 93.4   | 116.5  | 119.8  | FLJ33207   | <a href="#">NM_178554.3</a> |                                     |             |                       |
| GI_45505172-A | 506.3  | 1075.2 | 515.7  | GALNAC4S-ε | <a href="#">NM_015892.2</a> | BRAG;KIAA0598;MGC34346              | sulfotransf | integral to hexose    |
| GI_45505174-S | 185.6  | 203.8  | 183.3  | ECG2       | <a href="#">NM_032566.2</a> | ECRG2                               | serine-     |                       |
| GI_45505175-S | 3546.9 | 3185.4 | 1898.6 | DPYSL3     | <a href="#">NM_001387.2</a> | DRP3;ULIP;CRMP4;DRP-3;CRMP-4        | dihydropyr  | nucleobas             |
| GI_45505176-A | 123.8  | 128.6  | 123.8  | CTAG3      | <a href="#">NM_175745.3</a> | CAGE1;FLJ40441;bA69L16.7            |             |                       |
| GI_45505177-I | 97.3   | 117.2  | 105.9  | CTAG3      | <a href="#">NM_205864.1</a> | CAGE1;FLJ40441;bA69L16.7            |             |                       |
| GI_45505179-S | 583.6  | 585    | 622.8  | CAB2       | <a href="#">NM_033419.3</a> | PP1498;AGLA546;MGC9753              |             |                       |
| GI_45505181-I | 106.5  | 116.7  | 104.2  | ALS2CR19   | <a href="#">NM_152526.3</a> | PAR3B;PAR3L;MGC16131;PAR3beta       | protein     | tight cell cycle      |
| GI_45544621-S | 120    | 122.4  | 127.7  | MRVLDC3    | <a href="#">NM_052858.2</a> | MARVD3                              | ATP         | membran protein       |
| GI_45545404-I | 92.5   | 106.3  | 98.8   | NR5A2      | <a href="#">NM_205860.1</a> | B1F;CPF;FTF;B1F2;HB1F;LRH-1;FTZ-    | transcripti | nucleus pathogene     |
| GI_45545408-I | 131.3  | 135.2  | 113.6  | MOKA       | <a href="#">NM_205836.1</a> | SP329                               | receptor    |                       |

|               |         |        |        |           |                             |                               |             |             |              |
|---------------|---------|--------|--------|-----------|-----------------------------|-------------------------------|-------------|-------------|--------------|
| GI_45545416-S | 153     | 183.5  | 166.2  | MOG       | <a href="#">NM_002433.2</a> | MGC26137                      |             | integral to | central      |
| GI_45545420-S | 103.9   | 103.4  | 97.7   | LOC339221 | <a href="#">NM_178543.3</a> | MGC50179;ALK-SMase            | hydrolase   |             | nucleotide   |
| GI_45545422-I | 109.1   | 95.6   | 92.7   | MGC21644  | <a href="#">NM_182960.2</a> |                               |             |             |              |
| GI_45545423-I | 115     | 105.6  | 105.4  | LISCH7    | <a href="#">NM_205834.1</a> | MGC10659;MGC48312             | receptor    |             | metabolis    |
| GI_45545425-S | 88.6    | 94.5   | 91.9   | GIPR      | <a href="#">NM_000164.2</a> |                               | transmem    | integral to | adenylate    |
| GI_45545426-I | 91.4    | 83.6   | 81.7   | ESRRG     | <a href="#">NM_206594.1</a> | ERR3;NR3B3                    | transcripti | nucleus     | regulation   |
| GI_45545430-A | 280.9   | 298.5  | 209.3  | EGFL9     | <a href="#">NM_023932.2</a> | MGC2487                       | calcium     |             |              |
| GI_45545432-A | 101     | 101.3  | 92.9   | ESRRG     | <a href="#">NM_001438.2</a> | ERR3;NR3B3                    | transcripti | nucleus     | regulation   |
| GI_45545436-I | 277.5   | 132.3  | 108.4  | CLYBL     | <a href="#">NM_206808.1</a> | CLB;bA134O15.1                | malate      |             | tricarboxyli |
| GI_45545438-A | 164.4   | 197.8  | 178.1  | ALS2CR19  | <a href="#">NM_057177.4</a> | PAR3B;PAR3L;MGC16131;PAR3beta | protein     | tight       | cell cycle   |
| GI_45545438-I | 114.6   | 124.4  | 122.4  | ALS2CR19  | <a href="#">NM_057177.4</a> | PAR3B;PAR3L;MGC16131;PAR3beta | protein     | tight       | cell cycle   |
| GI_4557009-S  | 228.6   | 298.4  | 228    | ACP2      | <a href="#">NM_001610.1</a> |                               | acid        | lysosomal   |              |
| GI_4557013-S  | 678.5   | 1269.4 | 1532.2 | CAT       | <a href="#">NM_001752.1</a> |                               | catalase    | peroxisom   | response     |
| GI_4557017-S  | 275.7   | 483.7  | 292.3  | CHI3L1    | <a href="#">NM_001276.1</a> | GP39;YKL40;HC-gp39;HCGP-3P    | extracellul | extracellul | metabolis    |
| GI_4557023-S  | 86.9    | 82.8   | 87.5   | FOXJ1     | <a href="#">NM_001454.1</a> | HFH4;HFH-4;FKHL13             | DNA         | nucleus     | spermatog    |
| GI_4557025-S  | 295.4   | 354.1  | 309.3  | HERC1     | <a href="#">NM_003922.1</a> | p532;p619                     | ARF         | Golgi       | nonselecti   |
| GI_4557033-S  | 121.2   | 124.5  | 140.7  | MLN       | <a href="#">NM_002418.1</a> |                               | receptor    | soluble     | G-protein    |
| GI_4557039-S  | 358.2   | 415.9  | 382.4  | OSMR      | <a href="#">NM_003999.1</a> | OSMRB                         | oncostatin- | oncostatin- | cell         |
| GI_4557041-S  | 231.2   | 308.1  | 258.7  | PALM      | <a href="#">NM_002579.1</a> | KIAA0270                      |             | cytoplasmic | regulation   |
| GI_4557045-S  | 93.2    | 109.1  | 84.9   | SLC6A2    | <a href="#">NM_001043.1</a> | NET;NAT1;NET1;SLC6A5          | noradrenal  | membran     | small        |
| GI_4557226-S  | 86.2    | 93.9   | 86.1   | AADAC     | <a href="#">NM_001086.1</a> | DAC                           | catalytic   | microsom    | metabolis    |
| GI_4557228-S  | 576.5   | 584.6  | 714.2  | AAMP      | <a href="#">NM_001087.1</a> |                               | heparin     |             | cell         |
| GI_4557232-S  | 192.3   | 231.4  | 249.3  | ACADS     | <a href="#">NM_000017.1</a> | SCAD;ACAD3                    | acyl-CoA    | mitochond   | fatty acid   |
| GI_4557234-S  | 10738.2 | 12620  | 11646  | ACADVL    | <a href="#">NM_000018.1</a> | ACAD6;LCACD;VLCAD             | long-chain- | mitochond   | fatty acid   |
| GI_4557240-S  | 144.3   | 170.1  | 155.3  | ACTN3     | <a href="#">NM_001104.1</a> |                               | structural  | actin       |              |
| GI_4557242-S  | 125.7   | 116.9  | 94.8   | ACVRL1    | <a href="#">NM_000020.1</a> | HHT;ALK1;HHT2;ORW2;SKR3;ALK-  | transmem    | integral to | TGFbeta      |
| GI_4557248-S  | 1087    | 1217.3 | 574    | ADA       | <a href="#">NM_000022.1</a> |                               | adenosine   |             | adenosine    |
| GI_4557250-S  | 423.8   | 732.5  | 477.8  | ADAM10    | <a href="#">NM_001110.1</a> | kuz;MADM;HsT18717;kuzbanian   | metallope   | integral to | cell-cell    |
| GI_4557252-S  | 182.4   | 207.9  | 181.8  | ADAM8     | <a href="#">NM_001109.1</a> | MS2;CD156                     | metallope   | proteoglyc  | proteolysis  |
| GI_4557256-S  | 113.7   | 108.1  | 101.8  | ADCY8     | <a href="#">NM_001115.1</a> | ADCY3;HBAC1                   | calcium/ca  | membran     | learning     |
| GI_4557258-S  | 296.1   | 256.8  | 251.4  | ADCY9     | <a href="#">NM_001116.1</a> |                               | adenylate   | integral to | signal       |
| GI_4557264-S  | 106.5   | 105.5  | 99.5   | ADRB1     | <a href="#">NM_000684.1</a> | RHR;B1AR;ADRB1R               | beta1-      | integral to | adenylate    |
| GI_4557266-S  | 132     | 141    | 137.4  | ADRB3     | <a href="#">NM_000025.1</a> |                               | beta3-      | integral to | energy       |
| GI_4557268-S  | 5985.5  | 6135.6 | 5677.2 | ADSL      | <a href="#">NM_000026.1</a> |                               | adenylosu   |             | purine       |
| GI_4557274-I  | 129.5   | 138.1  | 132.7  | AGL       | <a href="#">NM_000028.1</a> | GDE                           | glycogen    | debranchi   | glycogen     |
| GI_4557276-I  | 115.7   | 126.5  | 126.9  | AGL       | <a href="#">NM_000642.1</a> | GDE                           | glycogen    | debranchi   | glycogen     |
| GI_4557280-A  | 248.3   | 340.4  | 316.3  | AGL       | <a href="#">NM_000644.1</a> | GDE                           | glycogen    | debranchi   | glycogen     |
| GI_4557282-I  | 111.9   | 124.9  | 100.1  | AGL       | <a href="#">NM_000645.1</a> | GDE                           | glycogen    | debranchi   | glycogen     |
| GI_4557284-I  | 103.3   | 104.6  | 103.2  | AGL       | <a href="#">NM_000646.1</a> | GDE                           | glycogen    | debranchi   | glycogen     |
| GI_4557286-S  | 152.1   | 136.1  | 114.9  | AGT       | <a href="#">NM_000029.1</a> | ANHU;SERPINA8                 | hormone     | soluble     | regulation   |
| GI_4557288-S  | 121.7   | 132.7  | 123.7  | AGXT      | <a href="#">NM_000030.1</a> | AGT;SPT;AGT1;SPAT;TLH6;AGXT1  | alanine-    | peroxisom   |              |
| GI_4557290-I  | 4569.6  | 4991.9 | 4326.6 | AIRE      | <a href="#">NM_000383.1</a> | APS1;APSI;PGA1;APECED         | transcripti | cytoplasm   | immune       |
| GI_4557294-A  | 225.3   | 316    | 259.9  | AIRE      | <a href="#">NM_000659.1</a> | APS1;APSI;PGA1;APECED         | transcripti | cytoplasm   | immune       |
| GI_4557298-S  | 129.7   | 151    | 135.6  | ALAS2     | <a href="#">NM_000032.1</a> | ASB;ANH1                      |             |             | heme         |

|              |        |        |        |          |                             |                                      |             |             |             |
|--------------|--------|--------|--------|----------|-----------------------------|--------------------------------------|-------------|-------------|-------------|
| GI_4557302-S | 208    | 251    | 266.9  | ALDH3A2  | <a href="#">NM_000382.1</a> | SLS;FALDH;ALDH10                     | aldehyde    | microsom    | epidermal   |
| GI_4557308-S | 152.3  | 177.3  | 130.4  | ALOX15B  | <a href="#">NM_001141.1</a> |                                      | lipoxygena  |             | fatty acid  |
| GI_4557310-S | 89.9   | 92.5   | 88.6   | AMPD1    | <a href="#">NM_000036.1</a> | MADA                                 | AMP         |             | adenylate   |
| GI_4557314-S | 118.3  | 116.6  | 108.8  | ANGPT2   | <a href="#">NM_001147.1</a> | ANG2                                 | receptor    | kinesin     | cell growth |
| GI_4557320-S | 119.4  | 123.6  | 102.6  | APOA1    | <a href="#">NM_000039.1</a> |                                      | high-       |             | cholester   |
| GI_4557322-S | 89.5   | 96.3   | 98.7   | APOC3    | <a href="#">NM_000040.1</a> |                                      | apolipopro  |             | lipid       |
| GI_4557324-S | 185.2  | 474.4  | 167.9  | APOE     | <a href="#">NM_000041.1</a> |                                      | lipid       |             | cholester   |
| GI_4557326-S | 98.1   | 106.8  | 85.7   | APOH     | <a href="#">NM_000042.1</a> | BG;B2G1                              | defense/i   |             |             |
| GI_4557328-S | 105.7  | 113.4  | 99.7   | TNFSF6   | <a href="#">NM_000639.1</a> | FASL;CD178;CD95L;APT1LG1             | receptor    | extracellul | induction   |
| GI_4557332-I | 183.8  | 227.8  | 252.2  | ARSB     | <a href="#">NM_000046.1</a> | ASB;G4S;MPS6                         | arylsulfata | lysosome    | lysosomal   |
| GI_4557334-S | 94.7   | 90     | 102.2  | ASPA     | <a href="#">NM_000049.1</a> | ASP;ACY2                             | aminoacyl   |             | aspartate   |
| GI_4557338-S | 107.7  | 98.7   | 93.8   | ATP4B    | <a href="#">NM_000705.1</a> | ATP6B                                | hydrogen/   | integral to | sodium      |
| GI_4557342-S | 1670.2 | 1980.4 | 2238.2 | ALDH7A1  | <a href="#">NM_001182.1</a> | ATQ1                                 | aldehyde    | cellular_co | hearing     |
| GI_4557346-S | 91     | 91     | 77     | BAGE     | <a href="#">NM_001187.1</a> | BAGE1                                | tumor       |             |             |
| GI_4557348-S | 238.2  | 162.5  | 203.5  | BARD1    | <a href="#">NM_000465.1</a> |                                      | tumor       | nucleus     |             |
| GI_4557350-S | 95.1   | 93.9   | 111.1  | BCHE     | <a href="#">NM_000055.1</a> | E1;CHE1                              | cholineste  |             |             |
| GI_4557354-I | 283.6  | 157.4  | 158.5  | BCL2     | <a href="#">NM_000633.1</a> | Bcl-2                                | apoptosis   | mitochond   | negative    |
| GI_4557356-I | 101.9  | 110    | 114.5  | BCL2     | <a href="#">NM_000657.1</a> | Bcl-2                                | apoptosis   | mitochond   | negative    |
| GI_4557364-S | 233.4  | 215.1  | 215.7  | BLM      | <a href="#">NM_000057.1</a> | BS;RECQ2;RECQL2;RECQL3               | helicase    | nucleus     | DNA         |
| GI_4557368-S | 114.4  | 121.7  | 114.9  | BMP2     | <a href="#">NM_001200.1</a> | BMP2A                                | receptor    | extracellul | skeletal    |
| GI_4557370-S | 126.6  | 144.4  | 131.1  | BMP3     | <a href="#">NM_001201.1</a> |                                      | receptor    |             | skeletal    |
| GI_4557372-S | 242.1  | 304    | 274    | BTD      | <a href="#">NM_000060.1</a> |                                      | biotin      |             | epidermal   |
| GI_4557374-S | 2564.7 | 5695.9 | 4604   | BTEB1    | <a href="#">NM_001206.1</a> | BTEB;KLF9                            | transcripti | nucleus     | regulation  |
| GI_4557376-S | 117.8  | 144.8  | 107.9  | BTK      | <a href="#">NM_000061.1</a> | AT;ATK;BPK;XLA;IMD1;AGMX1;PSCTK1     | protein-    | cytoplasm   | induction   |
| GI_4557378-S | 253.7  | 249.7  | 204.1  | SERPING1 | <a href="#">NM_000062.1</a> | C1IN;C1NH;HAE1;HAE2;C1-INH           | serpin      | extracellul | circulation |
| GI_4557380-S | 77.9   | 87.6   | 77.3   | C1orf1   | <a href="#">NM_001213.1</a> |                                      |             |             |             |
| GI_4557384-S | 118.2  | 388.8  | 317.8  | C3       | <a href="#">NM_000064.1</a> | ASP                                  | receptor    | extracellul | G-protein   |
| GI_4557388-S | 134.5  | 151    | 129.7  | C8A      | <a href="#">NM_000562.1</a> |                                      | compleme    | membran     | response    |
| GI_4557390-S | 164.7  | 203.6  | 171.4  | C8B      | <a href="#">NM_000066.1</a> |                                      | compleme    | membran     | response    |
| GI_4557392-S | 112.3  | 109.7  | 115.1  | C8G      | <a href="#">NM_000606.1</a> | C8C                                  | compleme    | membran     | compleme    |
| GI_4557394-S | 102    | 95.6   | 131.5  | CA2      | <a href="#">NM_000067.1</a> | CA-II                                | carbonate   | cytoplasm   | one-        |
| GI_4557396-S | 115.9  | 110.7  | 116.8  | CA6      | <a href="#">NM_001215.1</a> | GUSTIN                               | carbonate   |             | one-        |
| GI_4557400-S | 90.1   | 92.3   | 88.8   | CACNA1S  | <a href="#">NM_000069.1</a> | MHS5;HOKPP;hypoPP;CCHL1A3;CACNL1A    | dihydropyr  | voltage-    | small       |
| GI_4557408-S | 113.1  | 115.2  | 114.5  | CASQ2    | <a href="#">NM_001232.1</a> |                                      | calcium     | smooth      | heart       |
| GI_4557414-S | 507    | 463.9  | 411.9  | CBS      | <a href="#">NM_000071.1</a> | HIP4                                 | cystathioni | cytoplasm   | cysteine    |
| GI_4557416-S | 105.6  | 98.9   | 106.8  | CD14     | <a href="#">NM_000591.1</a> |                                      | peptidogly  | plasma      | phagocyto   |
| GI_4557418-S | 157.7  | 180.6  | 150.3  | CD36     | <a href="#">NM_000072.1</a> | FAT;GP4;GP3B;GPIV;SCARB3             | cell        | membran     | fatty acid  |
| GI_4557420-S | 228.8  | 291    | 279.4  | ENTPD2   | <a href="#">NM_001246.1</a> | CD39L1;NTPDase-2                     | adenosine   | integral to |             |
| GI_4557422-S | 932.8  | 896.4  | 735.7  | ENTPD6   | <a href="#">NM_001247.1</a> | CD39L2;IL6ST2;IL-6SAG;NTPDase-       | adenosine   | Golgi       |             |
| GI_4557424-S | 107.2  | 104.3  | 95.7   | ENTPD3   | <a href="#">NM_001248.1</a> | HB6;CD39L3;NTPDase-3                 | adenosine   | integral to |             |
| GI_4557426-S | 136.5  | 144.4  | 137.8  | ENTPD5   | <a href="#">NM_001249.1</a> | PCPH;CD39L4;NTPDase-5                | adenosine   | endoplas    |             |
| GI_4557428-S | 142    | 156    | 143.8  | CD3G     | <a href="#">NM_000073.1</a> | T3G;CD3-GAMMA                        | T-cell      | integral to | cellular    |
| GI_4557432-S | 123.5  | 139.9  | 113    | TNFSF5   | <a href="#">NM_000074.1</a> | IGM;IMD3;TRAP;gp39;CD154;CD40L;HIGM1 | receptor    | integral to | immune      |
| GI_4557434-S | 251    | 260.3  | 235.2  | CD68     | <a href="#">NM_001251.1</a> | SCARD1                               |             | lysosome    |             |

|              |        |        |        |         |                             |                                    |  |             |               |               |
|--------------|--------|--------|--------|---------|-----------------------------|------------------------------------|--|-------------|---------------|---------------|
| GI_4557436-S | 4959.6 | 4967.7 | 5088.5 | CDC20   | <a href="#">NM_001255.1</a> | p55CDC                             |  | spindle     | cell cycle    |               |
| GI_4557438-S | 165.5  | 201.1  | 177.2  | CDK3    | <a href="#">NM_001258.1</a> |                                    |  | cyclin-     | oncogene      |               |
| GI_4557440-S | 201.2  | 168.5  | 138.4  | CDKN1C  | <a href="#">NM_000076.1</a> | BWS;WBS;p57;BWCR;KIP2              |  | cyclin-     | nucleus       | cell cycle    |
| GI_4557442-S | 244.2  | 284.2  | 255.6  | CETP    | <a href="#">NM_000078.1</a> |                                    |  | catalytic   |               | cholesterol   |
| GI_4557446-S | 593.5  | 588.2  | 595.5  | CHD1    | <a href="#">NM_001270.1</a> |                                    |  | ATP         | chromatin     | chromosome    |
| GI_4557448-S | 178.4  | 172.8  | 169.4  | CHD2    | <a href="#">NM_001271.1</a> |                                    |  | ATP         | nucleus       | chromosome    |
| GI_4557452-S | 448.6  | 769.5  | 616.2  | CHD4    | <a href="#">NM_001273.1</a> | Mi2-BETA                           |  | ATP         | chromatin     | chromosome    |
| GI_4557454-S | 167    | 146.4  | 146.8  | CHK     | <a href="#">NM_001277.1</a> | CKI                                |  | choline     |               | lipid         |
| GI_4557456-S | 118.8  | 131.1  | 133.1  | CHRNA1  | <a href="#">NM_000079.1</a> | ACHRA;CHRNA                        |  | ion         | nicotinic     | small         |
| GI_4557460-S | 124.3  | 132    | 127.8  | CHRNA1  | <a href="#">NM_000079.1</a> | ACHRA;CHRNA                        |  | ion         | nicotinic     | small         |
| GI_4557460-S | 124.3  | 132    | 127.8  | CHRNA1  | <a href="#">NM_000079.1</a> | ACHRA;CHRNA                        |  | ion         | nicotinic     | small         |
| GI_4557460-S | 124.3  | 132    | 127.8  | CHRNA1  | <a href="#">NM_000079.1</a> | ACHRA;CHRNA                        |  | ion         | nicotinic     | small         |
| GI_4557466-S | 353.2  | 287.8  | 257.4  | CKN1    | <a href="#">NM_000082.1</a> | CSA;ERCC8                          |  | RNA         |               | DNA           |
| GI_4557468-S | 880.3  | 1157.1 | 1052.8 | AP2B1   | <a href="#">NM_001282.1</a> | ADTB2;CLAPB1;AP2-BETA              |  | vesicle     | clathrin      | nonselective  |
| GI_4557472-S | 98.8   | 96.9   | 93.9   | CLCN5   | <a href="#">NM_000084.1</a> | XRN;CLC5;XLRH;CLCK2;DENTS;NPHL2;hC |  | chloride    | integral to   | small         |
| GI_4557474-S | 165.3  | 191.5  | 188.3  | CLCNKB  | <a href="#">NM_000085.1</a> | CLCKB                              |  | voltage-    | membrane      | small         |
| GI_4557476-A | 541.8  | 650.7  | 552.2  | CLK2    | <a href="#">NM_001291.1</a> |                                    |  | protein     | nucleus       | protein       |
| GI_4557478-A | 815.9  | 772.8  | 673.2  | CLK3    | <a href="#">NM_001292.1</a> |                                    |  | protein     | nucleus       | protein       |
| GI_4557480-S | 100.9  | 112.5  | 99.7   | ABCC2   | <a href="#">NM_000392.1</a> | DJS;MRP2;cMRP;ABC30;CMOAT          |  | organic     | membrane      | small         |
| GI_4557484-S | 86.1   | 90.9   | 80.2   | CP      | <a href="#">NM_000096.1</a> |                                    |  | ferroxidase | extracellular | iron ion      |
| GI_4557490-S | 537.3  | 716.3  | 917.3  | CSTF1   | <a href="#">NM_001324.1</a> |                                    |  | RNA         | nucleus       | mRNA          |
| GI_4557492-S | 1022.8 | 843.1  | 891.6  | CSTF2   | <a href="#">NM_001325.1</a> |                                    |  | RNA         | nucleus       | mRNA          |
| GI_4557494-S | 513.4  | 474.4  | 284.5  | CSTF3   | <a href="#">NM_001326.1</a> |                                    |  | RNA         | nucleus       | mRNA          |
| GI_4557496-S | 96.9   | 113.4  | 103.2  | CTBP1   | <a href="#">NM_001328.1</a> |                                    |  | protein C-  | nucleus       | viral         |
| GI_4557498-A | 1203.5 | 1171.7 | 982.4  | CTBP2   | <a href="#">NM_001329.1</a> |                                    |  | tumor       |               | viral         |
| GI_4557498-I | 185.6  | 212    | 178.1  | CTBP2   | <a href="#">NM_001329.1</a> |                                    |  | tumor       |               | viral         |
| GI_4557504-S | 104.7  | 108.4  | 98.4   | CYBA    | <a href="#">NM_000101.1</a> |                                    |  | cytochrome  | membrane      | superoxide    |
| GI_4557508-S | 155.7  | 171.1  | 159.8  | CYLC2   | <a href="#">NM_001340.1</a> |                                    |  | structural  | cytoskeleton  | cell shape    |
| GI_4557510-S | 342    | 438.8  | 389.7  | DAPK3   | <a href="#">NM_001348.1</a> | ZIP;ZIPK                           |  | protein     | nucleus       | induction     |
| GI_4557514-S | 569.6  | 578.4  | 535.4  | DDB2    | <a href="#">NM_000107.1</a> |                                    |  | damaged     | nucleus       | pyrimidine-   |
| GI_4557516-S | 1682.6 | 1848.5 | 1732.6 | DHX15   | <a href="#">NM_001358.1</a> | DBP1;HRH2;DDX15;PRP43;PrPp43p      |  | RNA         | nucleus       | mRNA          |
| GI_4557521-S | 97.7   | 84.2   | 91.6   | DIO1    | <a href="#">NM_000792.2</a> | TXDI1                              |  | thyroxine   | integral to   | thyroid       |
| GI_4557526-S | 111.3  | 102.6  | 98.3   | DLG2    | <a href="#">NM_001364.1</a> | PSD-93                             |  | guanylate   | plasma        | intracellular |
| GI_4557528-S | 189.6  | 210.7  | 185.3  | DLG4    | <a href="#">NM_001365.1</a> | PSD95;SAP90                        |  | protein C-  |               | learning      |
| GI_4557534-S | 140.1  | 169    | 134.3  | SLC26A3 | <a href="#">NM_000111.1</a> | CLD;DRA                            |  | transcripti | integral to   | anion         |
| GI_4557538-S | 228.5  | 340.6  | 337.7  | SLC26A2 | <a href="#">NM_000112.1</a> | DTD;EDM4;DTDST;D5S1708             |  | sulfate     | membrane      | sulfate       |
| GI_4557540-S | 381    | 475.8  | 473.8  | DYT1    | <a href="#">NM_000113.1</a> | DQ2;TOR1A                          |  | endopepti   | cytoplasm     | heat          |
| GI_4557542-S | 217.8  | 281.2  | 159.6  | ECM2    | <a href="#">NM_001393.1</a> |                                    |  | integrin    | extracellular | cell-matrix   |
| GI_4557544-S | 86.7   | 93     | 94.5   | EDN3    | <a href="#">NM_000114.1</a> | ET3                                |  | receptor    | soluble       | circulation   |
| GI_4557546-A | 488.6  | 667    | 583.1  | EDNRB   | <a href="#">NM_000115.1</a> | ETB;ETRB;HSCR;ABCDS;HSCR2          |  | endothelin  | integral to   | negative      |
| GI_4557546-I | 98.6   | 101.8  | 89.3   | EDNRB   | <a href="#">NM_000115.1</a> | ETB;ETRB;HSCR;ABCDS;HSCR2          |  | endothelin  | integral to   | negative      |
| GI_4557552-S | 3412.8 | 2587.1 | 2145.2 | EMD     | <a href="#">NM_000117.1</a> | STA;EDMD                           |  |             | nuclear       | nonselective  |
| GI_4557554-S | 540.3  | 524.8  | 283.8  | ENG     | <a href="#">NM_000118.1</a> | END;ORW;HHT1;ORW1;CD105            |  | protein     | integral to   | circulation   |
| GI_4557556-S | 278.3  | 333    | 355.4  | EP300   | <a href="#">NM_001429.1</a> | p300                               |  | protein C-  | nucleus       | signal        |
| GI_4557558-S | 195.7  | 230.9  | 205.8  | EPB42   | <a href="#">NM_000119.1</a> | PA                                 |  | ATP         | peripheral    | cell shape    |
| GI_4557560-S | 201.6  | 289.5  | 249.5  | EPHX1   | <a href="#">NM_000120.2</a> | MEH;EPHX;EPOX                      |  | epoxide     | microsomal    | response      |

|              |        |        |        |         |                             |                                   |              |                         |
|--------------|--------|--------|--------|---------|-----------------------------|-----------------------------------|--------------|-------------------------|
| GI_4557561-S | 134.8  | 134.1  | 155.3  | EPOR    | <a href="#">NM_000121.2</a> | erythropoi                        | integral to  | signal                  |
| GI_4557562-S | 606.5  | 709.3  | 721.6  | ERCC3   | <a href="#">NM_000122.1</a> | XPB;BTF2;GTF2H;RAD25;TFIIH        | DNA          | nucleus nucleotide-     |
| GI_4557564-S | 209.7  | 276.5  | 238.6  | ERCC6   | <a href="#">NM_000124.1</a> | CSB;CKN2;COFS;RAD26               | DNA          | nucleus DNA             |
| GI_4557566-S | 119.6  | 134    | 126.3  | EREG    | <a href="#">NM_001432.1</a> | ER                                | epidermal    | extracellul EGF         |
| GI_4557568-S | 121.4  | 142.4  | 122.3  | ERN1    | <a href="#">NM_001433.1</a> | IRE1;IRE1P                        | endoribon    | endoplas protein        |
| GI_4557570-S | 1014.5 | 2747.6 | 2381.6 | EXT1    | <a href="#">NM_000127.1</a> | EXT                               | tumor        | endoplas glycosami      |
| GI_4557572-S | 754.8  | 1154.5 | 1080.3 | EXT2    | <a href="#">NM_000401.1</a> |                                   | tumor        | endoplas glycosami      |
| GI_4557574-S | 111.3  | 117.4  | 114.1  | FAAH    | <a href="#">NM_001441.1</a> |                                   | amidase      | insoluble fatty acid    |
| GI_4557576-S | 172.5  | 204.3  | 174.2  | FABP1   | <a href="#">NM_001443.1</a> | FABPL;L-FABP                      | lipid        | cytoplasm fatty acid    |
| GI_4557578-S | 116.4  | 118.7  | 120.7  | FABP4   | <a href="#">NM_001442.1</a> | A-FABP                            | fatty acid   | soluble transport       |
| GI_4557580-S | 288.8  | 591.2  | 359.2  | FABP5   | <a href="#">NM_001444.1</a> | EFABP;E-FABP;PAFABP;PA-FABP       | lipid        | cytoplasm epidermal     |
| GI_4557582-S | 227.7  | 271.3  | 177.4  | FABP6   | <a href="#">NM_001445.1</a> | ILBP;I-15P;ILBP3;ILLBP;I-BABP     | lipid        | cytoplasm negative      |
| GI_4557586-S | 1618.4 | 3153.7 | 2561.5 | FAH     | <a href="#">NM_000137.1</a> |                                   | fumarylac    | tyrosine                |
| GI_4557588-S | 697.5  | 497.7  | 384.4  | FANCC   | <a href="#">NM_000136.1</a> | FA3;FAC;FACC                      |              | cytoplasm DNA           |
| GI_4557592-S | 383.8  | 505.4  | 468.3  | FECH    | <a href="#">NM_000140.1</a> | EPP;FCE                           | ferrochelate | mitochond heme          |
| GI_4557594-S | 1067.6 | 762    | 1277.9 | FOXF2   | <a href="#">NM_001452.1</a> | FKHL6;FREAC2                      | RNA          | transcripti transcripti |
| GI_4557596-S | 113    | 98.6   | 109.6  | FLNC    | <a href="#">NM_001458.1</a> | ABPA;ABPL;FLN2;ABP-280;ABP280A    | actin        | actin                   |
| GI_4557598-S | 135    | 171.6  | 142.9  | G6PC    | <a href="#">NM_000151.1</a> | G6PT;GSD1a                        | glucose-6-   | microsom glycogen       |
| GI_4557600-S | 128    | 122.3  | 127.4  | GABRA2  | <a href="#">NM_000807.1</a> |                                   | benzodiaz    | integral to gamma-      |
| GI_4557606-S | 223    | 262.3  | 238    | GABRA6  | <a href="#">NM_000811.1</a> |                                   | benzodiaz    | integral to small       |
| GI_4557612-S | 129.8  | 133.9  | 121.9  | GALC    | <a href="#">NM_000153.1</a> |                                   | galactosyl   | lysosome carbohydr      |
| GI_4557616-S | 6157.7 | 5731.1 | 3130   | GAS6    | <a href="#">NM_000820.1</a> | AXSF;AXLLG                        | receptor     | extracellul signal      |
| GI_4557618-S | 1200.8 | 1620.2 | 1100.7 | GBE1    | <a href="#">NM_000158.1</a> | GBE                               | 1,4-alpha-   | glycogen                |
| GI_4557626-S | 117.8  | 119.9  | 139.6  | GLE1L   | <a href="#">NM_001499.1</a> |                                   |              | nuclear mRNA-           |
| GI_4557628-I | 113    | 106.7  | 98.5   | GPX5    | <a href="#">NM_001509.1</a> |                                   | glutathion   | extracellul response    |
| GI_4557630-S | 114.7  | 106.4  | 104    | GRIA4   | <a href="#">NM_000829.1</a> | GLUR4;GLURD                       | inotropic    | integral to small       |
| GI_4557632-S | 97.9   | 103.2  | 103.3  | GRID2   | <a href="#">NM_001510.1</a> |                                   | glutamate    | integral to small       |
| GI_4557634-S | 149    | 171.7  | 143.7  | HCRT    | <a href="#">NM_001524.1</a> | OX;PPOX                           |              | synaptic synaptic       |
| GI_4557636-S | 234.9  | 264.4  | 252.2  | HCRTR1  | <a href="#">NM_001525.1</a> | OX1R                              | G-protein    | integral to neuropepti  |
| GI_4557640-S | 2589.6 | 2666.3 | 2249.7 | HDAC2   | <a href="#">NM_001527.1</a> | RPD3;YAF1                         | histone      | nucleus regulation      |
| GI_4557642-S | 636.3  | 1375.6 | 1073.4 | HMGCR   | <a href="#">NM_000859.1</a> |                                   | hydroxym     | endoplas gonad          |
| GI_4557644-S | 1263.3 | 1631.6 | 1821.1 | HNRPL   | <a href="#">NM_001533.1</a> | hnRNP-L                           | heterogen    | nucleoplas RNA          |
| GI_4557646-S | 2460.6 | 3669.2 | 3132.3 | HSBP1   | <a href="#">NM_001537.1</a> |                                   | transcripti  | nucleus heat            |
| GI_4557648-S | 104.4  | 94.1   | 96.9   | HSD17B3 | <a href="#">NM_000197.1</a> | EDH17B3                           | estradiol    | microsom male           |
| GI_4557650-S | 593.2  | 739.5  | 633.4  | HSF4    | <a href="#">NM_001538.1</a> | CTM                               | transcripti  | nucleus heat            |
| GI_4557652-S | 120.3  | 87.2   | 92.9   | HTN3    | <a href="#">NM_000200.1</a> | HIS2;HTN2;HTN5                    | antifungal   | extracellul ossificatio |
| GI_4557654-S | 122.6  | 130.3  | 130.7  | IAPP    | <a href="#">NM_000415.1</a> | DAP;IAP;AMYLIN                    | receptor     | soluble pathogene       |
| GI_4557656-S | 1085.8 | 1034.8 | 824.5  | ICT1    | <a href="#">NM_001545.1</a> | DS-1                              | translation  | cellular_co biological_ |
| GI_4557662-S | 840.4  | 799.8  | 666.8  | IGBP1   | <a href="#">NM_001551.1</a> |                                   | protein      | cytoplasm response      |
| GI_4557666-S | 107.3  | 117    | 104.8  | IL2RA   | <a href="#">NM_000417.1</a> | CD25;IL2R;TCGFR                   | interleukin- | plasma cell             |
| GI_4557668-S | 2431.7 | 2479.6 | 3231.6 | IL4R    | <a href="#">NM_000418.1</a> | CD124;IL4RA                       | interleukin- | integral to signal      |
| GI_4557670-S | 366.1  | 407.1  | 347.2  | INS     | <a href="#">NM_000207.1</a> |                                   | insulin      | extracellul glucose     |
| GI_4557672-S | 142.5  | 168.2  | 164.8  | IPF1    | <a href="#">NM_000209.1</a> | IUF1;PDX1;IDX-1;MODY4;PDX-1;STF-1 | RNA          | nucleus histogene       |
| GI_4557674-S | 125.9  | 123    | 110.2  | ITGA6   | <a href="#">NM_000210.1</a> | CD49f                             | cell         | integrin cell-          |

|              |         |        |        |        |                             |                                   |             |              |            |
|--------------|---------|--------|--------|--------|-----------------------------|-----------------------------------|-------------|--------------|------------|
| GI_4557676-S | 126.7   | 149.4  | 164.8  | ITGB3  | <a href="#">NM_000212.1</a> | CD61;GP3A;GPIIIa                  | cell        | integrin     | blood      |
| GI_4557678-S | 537.7   | 687.7  | 347.4  | JAG1   | <a href="#">NM_000214.1</a> | AGS;AHD;AWS;HJ1;JAGL1             |             |              |            |
| GI_4557680-S | 119.4   | 131.3  | 118.5  | JAK3   | <a href="#">NM_000215.1</a> | JAKL;LJAK                         | protein-    |              | mesoderm   |
| GI_4557682-S | 1086.1  | 711.3  | 976    | KAL1   | <a href="#">NM_000216.1</a> | HHA;KAL;KMS;ADMLX;KALIG-1         | extracellul | extracellul  | axon       |
| GI_4557684-S | 115.1   | 117    | 108.2  | KCNA1  | <a href="#">NM_000217.1</a> | EA1;MK1;AEMK;HUK1;MBK1;RBK1;KV1.1 | potassium   | voltage-     | potassium  |
| GI_4557686-S | 133     | 145.4  | 140    | KCNE1  | <a href="#">NM_000219.1</a> | ISK;JLNS;LQT5;MinK                | potassium   | voltage-     | potassium  |
| GI_4557692-A | 115     | 113.6  | 112.2  | KHK    | <a href="#">NM_000221.1</a> |                                   | ketohekok   |              |            |
| GI_4557692-I | 178     | 203.2  | 210.2  | KHK    | <a href="#">NM_000221.1</a> |                                   | ketohekok   |              |            |
| GI_4557694-S | 78.1    | 162.5  | 139.3  | KIT    | <a href="#">NM_000222.1</a> | PBT;SCFR;CD117                    | protein-    | integral to  | oncogene   |
| GI_4557698-S | 104.8   | 117.4  | 101.2  | KRT12  | <a href="#">NM_000223.1</a> | K12                               | structural  | intermedia   | vision     |
| GI_4557700-S | 111.3   | 146.7  | 106.5  | KRT17  | <a href="#">NM_000422.1</a> | PC;K17;PC2;PCHC1                  | structural  | intermedia   | epidermal  |
| GI_4557702-S | 235.5   | 287.8  | 244.6  | KRT2A  | <a href="#">NM_000423.1</a> | KRTE;KRT2E                        | structural  | intermedia   | epidermal  |
| GI_4557704-S | 177.5   | 207.3  | 199.3  | KRT9   | <a href="#">NM_000226.1</a> | K9;EPPK                           | structural  | intermedia   | epidermal  |
| GI_4557712-S | 17963.1 | 7793.6 | 7407.3 | LAMB3  | <a href="#">NM_000228.1</a> | LAMNB1                            | structural  | laminin-5    | epidermal  |
| GI_4557714-S | 148.5   | 165.3  | 163.4  | LEP    | <a href="#">NM_000230.1</a> | OB;OBS                            | hormone     | extracellul  | energy     |
| GI_4557716-S | 154.1   | 177.5  | 161.4  | LHCGR  | <a href="#">NM_000233.1</a> | LHR;LCGR;LGR2                     | internaliza | endosome     | male       |
| GI_4557718-S | 407.5   | 403    | 478.4  | LIG1   | <a href="#">NM_000234.1</a> |                                   | DNA         | nucleus      | embryoge   |
| GI_4557720-S | 1266.2  | 1497.9 | 1692.1 | LIPA   | <a href="#">NM_000235.1</a> | LAL;CESD                          | lipoprotein | lysosome     | N-linked   |
| GI_4557722-S | 106.2   | 120.1  | 121.8  | LIPC   | <a href="#">NM_000236.1</a> | HL;HTGL;LIPH                      | triacylglyc |              | N-linked   |
| GI_4557724-S | 114.2   | 103.2  | 99.9   | LOR    | <a href="#">NM_000427.1</a> |                                   | structural  | insoluble    | cell shape |
| GI_4557726-S | 100.5   | 103.6  | 96.3   | LPL    | <a href="#">NM_000237.1</a> | LIPD                              | heparin     | extracellul  | fatty acid |
| GI_4557730-S | 1870.3  | 2719.4 | 2465.9 | LTBP1  | <a href="#">NM_000627.1</a> |                                   | protein     |              |            |
| GI_4557732-S | 670.9   | 575.4  | 500.7  | LTBP2  | <a href="#">NM_000428.1</a> | LTBP3                             | protein     | extracellul  | protein    |
| GI_4557736-S | 116.2   | 125.6  | 113.7  | MAT1A  | <a href="#">NM_000429.1</a> | MAT;SAMS;MATA1;SAMS1              | methionin   |              | amino      |
| GI_4557738-S | 82.2    | 91.1   | 87     | MBL2   | <a href="#">NM_000242.1</a> | MBL;MBP;MBP1;COLEC1               | mannose     | membran      | compleme   |
| GI_4557742-S | 78.7    | 101.3  | 89.3   | MEFV   | <a href="#">NM_000243.1</a> | FMF;MEF;TRIM20                    | actin       | microtubul   | inflammat  |
| GI_4557748-S | 101     | 135.9  | 103.8  | MHC2TA | <a href="#">NM_000246.1</a> | C2TA;CIITA                        | RNA         | nucleus      | perception |
| GI_4557750-S | 561.8   | 754.5  | 604.9  | MICA   | <a href="#">NM_000247.1</a> |                                   | protein     |              | cell       |
| GI_4557758-S | 126.3   | 174    | 171.6  | MPO    | <a href="#">NM_000250.1</a> |                                   | peroxidase  | lysosome     | anti-      |
| GI_4557760-S | 156.4   | 176.9  | 171.4  | MSH2   | <a href="#">NM_000251.1</a> | FCC1;COCA1;HNPCC;HNPCC1           | damaged     | nucleus      | mismatch   |
| GI_4557762-S | 88.9    | 104.4  | 85.1   | MTP    | <a href="#">NM_000253.1</a> |                                   | binding     | microsom     | lipid      |
| GI_4557764-S | 459.2   | 410.7  | 477.1  | MTR    | <a href="#">NM_000254.1</a> |                                   | homocyst    | intracellula | central    |
| GI_4557766-S | 808.6   | 886.3  | 772.6  | MUT    | <a href="#">NM_000255.1</a> | MCM                               | methylmal   | mitochond    | metabolis  |
| GI_4557768-S | 190.3   | 228.3  | 179.6  | MVK    | <a href="#">NM_000431.1</a> | MVLK                              | mevalonat   | peroxisom    | isoprenoid |
| GI_4557772-S | 130.3   | 135    | 121.7  | MYH7   | <a href="#">NM_000257.1</a> | CMH1;MYHCB                        | structural  | muscle       | striated   |
| GI_4557774-S | 131     | 152.5  | 151.3  | MYL2   | <a href="#">NM_000432.1</a> | MLC2                              | structural  | cytoskelet   | regulation |
| GI_4557776-S | 174.5   | 178.4  | 183.4  | MYL3   | <a href="#">NM_000258.1</a> | VLC1;MLC1V                        | structural  | muscle       | muscle     |
| GI_4557778-S | 90.8    | 99.2   | 88     | MYOC   | <a href="#">NM_000261.1</a> | GPOA;JOAG;TIGR;GLC1A              | structural  | cilium       | morphoge   |
| GI_4557780-S | 216.5   | 198    | 236.7  | NAGA   | <a href="#">NM_000262.1</a> | GALB;D22S674                      | alpha-N-    | lysosome     | carbohydr  |
| GI_4557782-S | 130.4   | 159.9  | 105.1  | NAT2   | <a href="#">NM_000015.1</a> | AAC2                              | arylamine   |              | metabolis  |
| GI_4557784-S | 178.7   | 206.7  | 190.8  | NCF1   | <a href="#">NM_000265.1</a> | NOXO2;p47phox                     | GTPase      | cytosol      | superoxid  |
| GI_4557786-S | 207.8   | 334.4  | 140.2  | NCF2   | <a href="#">NM_000433.1</a> | NOXA2;P67PHOX;P67-PHOX            | electron    | cytosol      | superoxid  |
| GI_4557788-S | 100.4   | 100.4  | 82     | NDP    | <a href="#">NM_000266.1</a> | ND                                | growth      | extracellul  | vacuole    |
| GI_4557792-S | 125.4   | 150.7  | 129    | NF1    | <a href="#">NM_000267.1</a> | WSS;NFNS;VRNF                     | Ras         | cytoplasm    | negative   |



|               |        |        |        |           |                             |                                         |              |             |              |
|---------------|--------|--------|--------|-----------|-----------------------------|-----------------------------------------|--------------|-------------|--------------|
| GI_4557798-S  | 105    | 229.6  | 144.5  | NOTCH3    | <a href="#">NM_000435.1</a> | CASIL;CADASIL                           |              | integral to | embryoge     |
| GI_4557800-S  | 1179   | 648.4  | 1153.1 | NP        | <a href="#">NM_000270.1</a> | PNP                                     | purine-      |             | DNA          |
| GI_4557802-S  | 9092.8 | 4204   | 5584.6 | NPC1      | <a href="#">NM_000271.1</a> | NPC                                     | intracellula | lysosome    | intracellula |
| GI_4557804-S  | 125.2  | 123.4  | 123.7  | NPHP1     | <a href="#">NM_000272.1</a> | NPH1;SLSN1                              | protein      | kinesin     | excretion    |
| GI_4557806-S  | 142.2  | 166.2  | 147.8  | GPR143    | <a href="#">NM_000273.1</a> | OA1                                     | G-protein    | membran     | eye          |
| GI_4557808-S  | 1956.2 | 2430.6 | 2504.2 | OAT       | <a href="#">NM_000274.1</a> | HOGA                                    | ornithine-   | mitochond   | ornithine    |
| GI_4557810-S  | 152.4  | 166.2  | 177.5  | OCA2      | <a href="#">NM_000275.1</a> | P;PED;BOCA;D15S12                       | L-tyrosine   | integral to | eye          |
| GI_4557816-S  | 211.7  | 262.9  | 360.3  | OXCT      | <a href="#">NM_000436.1</a> | SCOT;OXCT1                              | 3-oxoacid    | mitochond   | succinyl-    |
| GI_4557818-S  | 84.6   | 87.1   | 77.6   | PAH       | <a href="#">NM_000277.1</a> | PKU;PKU1                                | phenylala    |             | amino        |
| GI_4557830-S  | 675.9  | 628.4  | 680.6  | PCBD      | <a href="#">NM_000281.1</a> | PCD;DCOH                                | 4-alpha-     | cytoplasm   | L-           |
| GI_4557832-S  | 726.6  | 473.5  | 589.2  | PCCA      | <a href="#">NM_000282.1</a> |                                         | biotin       | mitochond   | fatty acid   |
| GI_4557834-S  | 2242.2 | 2317.2 | 2535.8 | PEPD      | <a href="#">NM_000285.1</a> | MGC10905;PROLIDASE                      | metallocar   |             | proteolysis  |
| GI_4557838-S  | 1200.3 | 1323.4 | 1495.9 | PMM2      | <a href="#">NM_000303.1</a> | CDG1;CDGS                               | phosphom     | cytoplasm   | GDP-         |
| GI_4557840-S  | 98.7   | 120.7  | 95.1   | RAG1      | <a href="#">NM_000448.1</a> | RNF74                                   | DNA          | nucleus     | hemocyte     |
| GI_4557844-S  | 296.9  | 405.7  | 402.8  | RRM2      | <a href="#">NM_001034.1</a> | R2                                      | ribonucleo   | cytoplasm   | DNA          |
| GI_4557846-S  | 95.2   | 91.6   | 89.2   | SGCG      | <a href="#">NM_000231.1</a> | A4;MAM;DMDA;SCG3;TYPE;DAGA4;DMDA1       |              | sarcoglyca  | muscle       |
| GI_4557848-S  | 129.4  | 154.5  | 140.7  | SLC12A1   | <a href="#">NM_000338.1</a> | BSC1;NKCC2                              | sodium:ch    | integral to | small        |
| GI_4557850-S  | 96.7   | 99.8   | 94     | SLC2A2    | <a href="#">NM_000340.1</a> | GLUT2                                   | glucose      | membran     | glucose      |
| GI_4557862-S  | 122.2  | 143.3  | 118.9  | SSTR4     | <a href="#">NM_001052.1</a> |                                         | somatosta    | integral to | negative     |
| GI_4557864-S  | 131.1  | 142.1  | 127.1  | SSTR5     | <a href="#">NM_001053.1</a> |                                         | somatosta    | integral to | negative     |
| GI_4557866-S  | 143.2  | 192.2  | 161.6  | SUOX      | <a href="#">NM_000456.1</a> |                                         | sulfite      | mitochond   | methionin    |
| GI_4557868-S  | 160.2  | 162.5  | 147.7  | TEK       | <a href="#">NM_000459.1</a> | TIE2;VMCM;TIE-2;VMCM1;CD202B            | transmem     | integral to | transmem     |
| GI_4557872-S  | 3247.8 | 3718.4 | 3460.6 | UROS      | <a href="#">NM_000375.1</a> |                                         | uroporphy    |             | uroporphy    |
| GI_4557874-S  | 369.9  | 277.7  | 291.9  | DPYD      | <a href="#">NM_000110.2</a> | DHP;DPD                                 |              |             |              |
| GI_4557875-S  | 157.5  | 293.3  | 169.1  | ABCA4     | <a href="#">NM_000350.1</a> | FFM;RMP;ABCR;RP19;STGD;ABC10;STGD       | ATP          | membran     | phototrans   |
| GI_4557877-S  | 337.6  | 440.6  | 353.1  | ICAM1     | <a href="#">NM_000201.1</a> | BB2;CD54                                | transmem     | proteoglyc  | cell-cell    |
| GI_4557879-S  | 1650.5 | 1479.2 | 1285.5 | IFNGR1    | <a href="#">NM_000416.1</a> | CD119;IFNGR                             | interferon-  | integral to | resistance   |
| GI_4557881-S  | 130.2  | 151.3  | 135.2  | IL2RG     | <a href="#">NM_000206.1</a> | IMD4;CD132;SCIDX;SCIDX1                 | interleukin- | integral to | signal       |
| GI_4557883-S  | 107.4  | 121.8  | 120.5  | INSR      | <a href="#">NM_000208.1</a> |                                         | transmem     | integral to | cell growth  |
| GI_4557885-S  | 150.9  | 118.6  | 103.1  | ITGB2     | <a href="#">NM_000211.1</a> | LAD;CD18;MF17;LCAMB;LFA-1               | cell         | integrin    | integrin-    |
| GI_4557891-S  | 276.8  | 290.1  | 258.4  | LCAT      | <a href="#">NM_000229.1</a> |                                         | acyltransf   | extracellul | lipid        |
| GI_4557893-S  | 78.8   | 83.5   | 78.3   | LYZ       | <a href="#">NM_000239.1</a> |                                         | lysozyme     | extracellul | antimicrob   |
| GI_4557895-S  | 202.1  | 202.2  | 239.7  | MTM1      | <a href="#">NM_000252.1</a> | CNM;MTMX;XLMTM                          | protein      | cellular_co | cell growth  |
| GI_45580687-S | 167.7  | 190.9  | 177    | C7        | <a href="#">NM_000587.2</a> |                                         | compleme     | membran     | response     |
| GI_45580689-S | 94.2   | 103.6  | 92.4   | CLECSF7   | <a href="#">NM_130441.2</a> | DLEC;HECL;BDCA2;CLECSF11                | sugar        |             | heterophili  |
| GI_45580690-S | 8625.2 | 17294  | 2475.3 | COL4A1    | <a href="#">NM_001845.3</a> |                                         | collagen     | collagen    | regulation   |
| GI_45580693-S | 1276.2 | 1815   | 1992.1 | LOC284361 | <a href="#">NM_175063.3</a> | INM02;AAAS764;MGC33203                  |              |             |              |
| GI_45580697-A | 90.6   | 112.9  | 113.5  | EDG2      | <a href="#">NM_001401.3</a> | LPA1;edg-2;vzg-1;Gpcr26;Mrec1.3;rec.1.3 | G-protein    | integral to | cytosolic    |
| GI_45580699-S | 115.9  | 179.9  | 127.6  | ENTPD1    | <a href="#">NM_001776.3</a> | CD39;ATPDase;NTPDase-1                  | adenosine    | membran     | blood        |
| GI_45580703-S | 97.3   | 111.1  | 100.3  | FLJ39647  | <a href="#">NM_173625.3</a> | MGC34759                                |              |             |              |
| GI_45580705-S | 99.2   | 106.3  | 107.6  | FOXD4L1   | <a href="#">NM_012184.3</a> | bA395L14.1                              | transcripti  | nucleus     | regulation   |
| GI_45580706-S | 110.7  | 108.6  | 100.4  | HS6ST3    | <a href="#">NM_153456.2</a> |                                         | transferas   |             |              |
| GI_45580708-S | 149.2  | 175.2  | 162.1  | UNC93B1   | <a href="#">NM_030930.2</a> | UNC93;UNC93B                            |              |             |              |
| GI_45580710-I | 147.2  | 187.9  | 158.4  | BAT1      | <a href="#">NM_004640.4</a> | D6S81E                                  | ATP-         | nucleus     |              |

|               |        |        |        |           |                             |                                             |             |              |              |
|---------------|--------|--------|--------|-----------|-----------------------------|---------------------------------------------|-------------|--------------|--------------|
| GI_45580711-A | 2693.5 | 3864.8 | 2897.7 | BAT1      | <a href="#">NM_080598.3</a> | D6S81E                                      | ATP-        | nucleus      |              |
| GI_45580714-A | 250.2  | 239.5  | 187.6  | OSCAR     | <a href="#">NM_133168.2</a> | PIGR3;MGC33613                              | receptor    |              |              |
| GI_45580720-S | 129.9  | 129.7  | 115.2  | HOXB4     | <a href="#">NM_024015.3</a> | HOX2;HOX2F;HOX-2.6                          | transcripti | nucleus      | regulation   |
| GI_45580721-S | 98.3   | 111.2  | 98.3   | HOXC8     | <a href="#">NM_022658.3</a> | HOX3;HOX3A                                  | transcripti | nucleus      | regulation   |
| GI_45580722-S | 92.3   | 112.5  | 90     | HPR       | <a href="#">NM_020995.3</a> |                                             | plasma      |              | proteolysis  |
| GI_45580724-S | 128.2  | 140.1  | 120.9  | GDA       | <a href="#">NM_004293.2</a> | CYPIN;GUANASE;NEDASIN;KIAA1258              | guanine     | intracellula | nucleobas    |
| GI_45580725-S | 124.3  | 130.4  | 96.2   | GNAZ      | <a href="#">NM_002073.2</a> |                                             | heterotrim  | nuclear      | G-protein    |
| GI_45580726-S | 112.8  | 172.9  | 174.5  | MAP1A     | <a href="#">NM_002373.4</a> | MAP1L;MTAP1A                                | structural  | microtubul   | cell shape   |
| GI_45580729-S | 535.3  | 440.3  | 354.6  | NRPS998   | <a href="#">NM_181806.2</a> |                                             | catalytic   |              | electron     |
| GI_45580741-S | 922.8  | 1218.1 | 1011.7 | DHDDS     | <a href="#">NM_024887.2</a> | DS;CIT;HDS;FLJ13102                         | transferas  |              | metabolis    |
| GI_45580743-I | 85.7   | 98.3   | 127.1  | ADD3      | <a href="#">NM_016824.2</a> | ADDL                                        | structural  | membran      |              |
| GI_45580744-I | 100.9  | 104    | 94.4   | CLYBL     | <a href="#">NM_138280.3</a> | CLB;bA134O15.1                              | malate      |              | tricarboxyli |
| GI_45592948-S | 89     | 91     | 94.8   | UNQ9372   | <a href="#">NM_206832.1</a> |                                             |             |              |              |
| GI_45592951-S | 441.1  | 404.7  | 458.6  | DESR1     | <a href="#">NM_206831.1</a> |                                             |             |              |              |
| GI_45592953-S | 2502.3 | 4643.2 | 6646.8 | CTXN1     | <a href="#">NM_206833.1</a> | CTXN;FLJ25968                               |             |              |              |
| GI_45592958-S | 136.8  | 162.2  | 143.5  | LDB3      | <a href="#">NM_007078.1</a> | ZASP;CYPHER;ORACLE;PDLIM6;KIAA0613; protein |             |              | electron     |
| GI_45592960-S | 159.1  | 180.5  | 184.5  | C20orf70  | <a href="#">NM_080574.1</a> | SPLUNC2;bA49G10.1                           | lipid       |              |              |
| GI_45592962-S | 282.6  | 360.6  | 305    | RASL11A   | <a href="#">NM_206827.1</a> |                                             |             |              |              |
| GI_45593129-S | 2453.4 | 1919   | 1403.5 | NS        | <a href="#">NM_014366.4</a> | E2IG3;MGC800                                |             |              |              |
| GI_45593137-S | 307.9  | 344.2  | 328    | LRRRC25   | <a href="#">NM_145256.2</a> | MAPA                                        |             |              |              |
| GI_45593139-S | 1398   | 982.6  | 1030.3 | GTPBP2    | <a href="#">NM_019096.3</a> | MGC74725                                    | GTPase      |              | small        |
| GI_45593141-S | 121.3  | 128.2  | 120    | KBTBD5    | <a href="#">NM_152393.2</a> | SRYP;FLJ32015                               | protein     |              | DNA          |
| GI_45593143-S | 129.2  | 132.1  | 123.4  | GBX2      | <a href="#">NM_001485.2</a> |                                             | transcripti | nucleus      | histogene    |
| GI_45593145-S | 106.1  | 112.8  | 102.8  | GFRA3     | <a href="#">NM_001496.3</a> |                                             | GPI-        | peripheral   | peripheral   |
| GI_45593146-I | 132.6  | 127.5  | 117.3  | EGFL9     | <a href="#">NM_206539.1</a> | MGC2487                                     | calcium     |              |              |
| GI_45593148-A | 524.5  | 1047   | 438    | ADD3      | <a href="#">NM_019903.2</a> | ADDL                                        | structural  | membran      |              |
| GI_4559405-S  | 92     | 97.4   | 100.4  | C6        | <a href="#">NM_000065.1</a> |                                             | compleme    | membran      | response     |
| GI_4559407-S  | 412.4  | 515.3  | 447    | CSF2RB    | <a href="#">NM_000395.1</a> | CD131;IL3RB;IL5RB;CDw131                    | receptor    | granulocyt   | respiratory  |
| GI_45594239-S | 120.9  | 156    | 130.5  | LSAMP     | <a href="#">NM_002338.2</a> | LAMP                                        | cell        | peripheral   | neurogene    |
| GI_45594308-S | 131.4  | 146.9  | 156.5  | MAP7      | <a href="#">NM_003980.3</a> | EMAP115;E-MAP-115                           | structural  | microtubul   | establish    |
| GI_45594309-S | 102.6  | 112.2  | 102.4  | OR5V1     | <a href="#">NM_030876.4</a> | 6M1-21;hs6M1-21                             | olfactory   | integral to  | perception   |
| GI_45594311-S | 978.5  | 972.4  | 914.8  | RFWD1     | <a href="#">NM_032271.2</a> | TRAF7;RNF119;DKFZp5861021                   | zinc ion    |              |              |
| GI_45594507-S | 107.9  | 113    | 97.8   | LOC390511 | <a href="#">NM_206838.1</a> |                                             |             |              |              |
| GI_45594662-S | 195    | 204.9  | 204    | MMP15     | <a href="#">NM_002428.2</a> | MTMMP2;SMCP-2;MT2-MMP                       | enzyme      | extracellul  | protein      |
| GI_45597173-S | 258.8  | 296.7  | 245.8  | NFYB      | <a href="#">NM_006166.3</a> | HAP3;CBF-A;CBF-B;NF-YB                      | transcripti | nucleus      | regulation   |
| GI_45597457-S | 126.6  | 116.3  | 123.9  | KRT1B     | <a href="#">NM_175078.1</a> |                                             |             | intermedia   |              |
| GI_45597461-S | 118.7  | 115.3  | 125.4  | C6orf201  | <a href="#">NM_206834.1</a> | MGC87625                                    |             |              |              |
| GI_45598368-S | 97.8   | 112.7  | 86.3   | EMX1      | <a href="#">NM_004097.1</a> |                                             | transcripti | nucleus      | developm     |
| GI_45598382-S | 1076.7 | 703.9  | 553.1  | C20orf42  | <a href="#">NM_017671.3</a> | URP1;KIND1;DTGCU2;FLJ20116                  | protein     | cytoskelet   | cell         |
| GI_45643116-S | 694.8  | 671.7  | 603.9  | TLK2      | <a href="#">NM_006852.2</a> | MGC44450;PKU-ALPHA                          | ATP         | cellular_co  | protein      |
| GI_45643118-A | 1551.8 | 1606.6 | 2157.9 | PECI      | <a href="#">NM_006117.2</a> | DRS1;ACBD2;HCA88                            | acyl-CoA    | peroxisom    | fatty acid   |
| GI_45643120-I | 76.7   | 86.7   | 81.8   | PECI      | <a href="#">NM_206836.1</a> | DRS1;ACBD2;HCA88                            | acyl-CoA    | peroxisom    | fatty acid   |
| GI_45643122-S | 203.7  | 194.8  | 193.7  | NVL       | <a href="#">NM_002533.2</a> |                                             | ATP         | nucleus      |              |
| GI_45643130-I | 136.7  | 181.9  | 200.2  | NOR1      | <a href="#">NM_206837.1</a> | MGC26685                                    |             |              |              |

|               |         |        |        |          |                             |                                   |             |             |             |
|---------------|---------|--------|--------|----------|-----------------------------|-----------------------------------|-------------|-------------|-------------|
| GI_45643132-I | 140.8   | 166.5  | 153.8  | NOR1     | <a href="#">NM_145047.3</a> | MGC26685                          |             |             |             |
| GI_45643134-I | 130.4   | 142.5  | 127.5  | MORF4L1  | <a href="#">NM_206839.1</a> | MRG15;HsT17725;MGC10631;MORFRG15  | chromatin   | chromatin   | chromatin   |
| GI_45643136-A | 8011    | 10190  | 9549.1 | MORF4L1  | <a href="#">NM_006791.2</a> | MRG15;HsT17725;MGC10631;MORFRG15  | chromatin   | chromatin   | chromatin   |
| GI_45643137-S | 91.2    | 92.6   | 95     | KLHL13   | <a href="#">NM_033495.2</a> | FLJ10262;KIAA1309;MGC74791        | protein     |             |             |
| GI_45643139-S | 117.9   | 119.5  | 124.4  | LGI3     | <a href="#">NM_139278.2</a> |                                   | transporte  |             | transport   |
| GI_4580414-S  | 123.7   | 144.6  | 122.1  | ALDH3B2  | <a href="#">NM_000695.2</a> | ALDH8                             | aldehyde    |             | alcohol     |
| GI_4580418-S  | 99.8    | 109.8  | 102.1  | SERPINA6 | <a href="#">NM_001756.2</a> | CBG                               | serpin      |             | transport   |
| GI_4580419-A  | 87.5    | 96.4   | 97.6   | KITLG    | <a href="#">NM_003994.2</a> | SF;MGF;SCF;KL-1;Kitl              | stem cell   | integral to | histogene   |
| GI_4580421-A  | 312.4   | 396.9  | 436.6  | NPR2     | <a href="#">NM_003995.2</a> | NPRB;ANPRB;GUC2B;NPRBi            | transmem    | integral to | regulation  |
| GI_4585642-S  | 194.5   | 179.8  | 181.7  | ZNF264   | <a href="#">NM_003417.1</a> |                                   |             |             |             |
| GI_4585709-I  | 118.5   | 135.6  | 118.7  | ADAM11   | <a href="#">NM_002390.2</a> | MDC                               | integrin    | integral to | integrin-   |
| GI_4585711-S  | 107.1   | 102.6  | 104    | NTRK1    | <a href="#">NM_002529.2</a> | MTC;TRK;TRKA                      | neurotrop   | integral to | transmem    |
| GI_4585861-S  | 335.9   | 328.3  | 351.6  | CENPA    | <a href="#">NM_001809.2</a> |                                   | chromatin   | centromer   | chromoso    |
| GI_4585863-S  | 100.8   | 98.2   | 86     | PDE6A    | <a href="#">NM_000440.1</a> | PDEA;CGPR-A                       | cGMP-       |             | vision      |
| GI_4585865-S  | 710     | 746.4  | 623    | TCF12    | <a href="#">NM_003205.2</a> | HEB;HTF4;HsT17266                 | RNA         | nucleus     | muscle      |
| GI_4753158-S  | 3213.5  | 3426.6 | 2731.5 | GTF3A    | <a href="#">NM_002097.1</a> | AP2;TFIIIA                        | RNA         | nucleus     | rRNA        |
| GI_4753160-S  | 278.2   | 437.1  | 431.2  | GTF3C1   | <a href="#">NM_001520.1</a> | TFIIIC;TFIIIC220;TFIIICalpha      | RNA         | transcripti | tRNA        |
| GI_4755127-I  | 261.3   | 324.4  | 280.9  | ATF3     | <a href="#">NM_004024.2</a> |                                   | transcripti | nucleus     | regulation  |
| GI_4755130-S  | 84.4    | 92.1   | 86.1   | CCK      | <a href="#">NM_000729.2</a> |                                   | hormone     | soluble     | signal      |
| GI_4755133-S  | 2301.7  | 4073.1 | 1798.1 | DOK1     | <a href="#">NM_001381.2</a> | P62DOK                            | protein     |             | transmem    |
| GI_4755135-S  | 430.6   | 326    | 127    | FBN2     | <a href="#">NM_001999.2</a> | CCA                               | extracellul | extracellul | embryoge    |
| GI_4755136-S  | 80.5    | 86.3   | 82.1   | GJA1     | <a href="#">NM_000165.2</a> | ODD;CX43;ODDD;ODOD;SDTY3;DFNB38   | ion         | connexon    | heart       |
| GI_4755138-S  | 375.5   | 346.2  | 254.8  | INPP1    | <a href="#">NM_002194.2</a> |                                   | inositol-   |             | phosphate   |
| GI_4755139-A  | 96.2    | 92.2   | 81.2   | INPP4A   | <a href="#">NM_004027.1</a> | INPP4                             |             |             | signal      |
| GI_4755139-I  | 157.6   | 169.9  | 152.3  | INPP4A   | <a href="#">NM_004027.1</a> | INPP4                             |             |             | signal      |
| GI_4755141-S  | 1991.3  | 1916   | 1630   | INPPL1   | <a href="#">NM_001567.2</a> | SHIP2                             | inositol/ph |             | phosphate   |
| GI_4755143-S  | 4732.7  | 2967.1 | 3946.5 | IRAK1    | <a href="#">NM_001569.2</a> | IRAK;pelle                        | NF-         |             | protein     |
| GI_4755144-S  | 209.3   | 232.6  | 223.9  | IRF2     | <a href="#">NM_002199.2</a> | IRF-2                             | RNA         | nucleus     | oncogene    |
| GI_4755145-S  | 104.1   | 123.6  | 108.5  | AEBP1    | <a href="#">NM_001129.2</a> | ACLIP                             | carboxype   | cytoplasm   | muscle      |
| GI_4757701-S  | 2122.6  | 3234.3 | 2800.2 | EIF4EL3  | <a href="#">NM_004846.1</a> | 4EHP;IF4E;4E-LP                   | mRNA        | cytoplasm   | regulation  |
| GI_4757715-S  | 1204.5  | 1258.7 | 1192.6 | SPAG7    | <a href="#">NM_004890.1</a> | ACRP;FSA-1;MGC20134               | nucleic     |             |             |
| GI_4757725-S  | 177.1   | 208.5  | 190.8  | MLLT10   | <a href="#">NM_004641.1</a> | AF10                              | DNA         | nucleus     | cell growth |
| GI_4757733-S  | 280.3   | 584.9  | 617.5  | AIM2     | <a href="#">NM_004833.1</a> |                                   | tumor       |             | immune      |
| GI_4757753-S  | 84.8    | 77.6   | 83.5   | ANXA13   | <a href="#">NM_004306.1</a> | ISA;ANX13                         | calcium-    | plasma      | cell        |
| GI_4757755-S  | 13236.9 | 21215  | 11834  | ANXA2    | <a href="#">NM_004039.1</a> | ANX2;LIP2;LPC2;CAL1H;LPC2D;ANX2L4 | phospholi   | soluble     | skeletal    |
| GI_4757769-S  | 122.2   | 111.7  | 112.9  | ARHH     | <a href="#">NM_004310.1</a> | TTF;RHOH                          | Rho small   |             | oncogene    |
| GI_4757771-S  | 121.5   | 118.9  | 110.4  | ARHI     | <a href="#">NM_004675.1</a> | NOEY2                             | small       |             | small       |
| GI_4757775-S  | 107.1   | 108.9  | 101.6  | ARR3     | <a href="#">NM_004312.1</a> | ARRX                              |             | soluble     | vision      |
| GI_4757783-S  | 97.5    | 85.2   | 89.6   | ART1     | <a href="#">NM_004314.1</a> | RT6;ART2                          | NAD ADP-    | integral to | protein     |
| GI_4757787-S  | 143.4   | 205    | 153.2  | ASCL1    | <a href="#">NM_004316.1</a> | ASH1;HASH1;MASH1                  | transcripti | nucleus     | oncogene    |
| GI_4757789-S  | 1240.2  | 1227.4 | 1412   | ASH2L    | <a href="#">NM_004674.1</a> | ASH2L1;ASH2L2                     | RNA         | nucleus     | regulation  |
| GI_4757791-S  | 146.9   | 141.5  | 154.2  | ASMT     | <a href="#">NM_004043.1</a> | ASMTY;HIOMT;HIOMTY                | O-          |             | protein     |
| GI_4757793-S  | 460.8   | 701.2  | 625.9  | ASMTL    | <a href="#">NM_004192.1</a> | ASTML;ASMTLX                      | acetylsero  | cellular_co | melatonin   |
| GI_4757795-S  | 397.3   | 502    | 570.4  | ASNA1    | <a href="#">NM_004317.1</a> | ARSA1;ARSA-I                      | arsenite    | soluble     | nucleocyto  |

|              |        |        |        |          |                             |                                   |             |              |               |
|--------------|--------|--------|--------|----------|-----------------------------|-----------------------------------|-------------|--------------|---------------|
| GI_4757797-S | 301.3  | 212.4  | 175.5  | APG5L    | <a href="#">NM_004849.1</a> | ASP;APG5;hAPG5                    |             | cytoplasm    | apoptosis     |
| GI_4757805-S | 427.8  | 384.2  | 405.9  | C16orf7  | <a href="#">NM_004913.1</a> | ATP-BL                            | transporte  |              | ATP           |
| GI_4757807-S | 212.5  | 238.9  | 222.8  | ATP2B2   | <a href="#">NM_001683.1</a> | PMCA2                             | adenosine   | integral to  | small         |
| GI_4757811-S | 2056.1 | 2882.7 | 2813.1 | ATP5J2   | <a href="#">NM_004889.1</a> | ATP5JL;F1Fo-ATPase                | hydrogen    | mitochondr   | proton        |
| GI_4757823-S | 80.2   | 85.8   | 82.4   | AXIN2    | <a href="#">NM_004655.1</a> | AXIL                              | tumor       | intracellula | signal        |
| GI_4757845-S | 175.4  | 200.5  | 194.1  | BCL9     | <a href="#">NM_004326.1</a> | LGS                               |             | nucleus      | oncogene      |
| GI_4757849-S | 128.7  | 164.3  | 168    | ABCG2    | <a href="#">NM_004827.1</a> | MRX;MXR;ABCP;BCRP;BMDP;MXR1;ABC1  | xenobiotic- | integral to  | drug          |
| GI_4757855-S | 900.6  | 1026.7 | 852.2  | BNIP2    | <a href="#">NM_004330.1</a> | NIP2;BNIP-2                       | apoptosis   |              | anti-         |
| GI_4757859-S | 730.9  | 833.5  | 715.9  | BNIP3L   | <a href="#">NM_004331.1</a> | NIX;BNIP3a                        | tumor       | integral to  | negative      |
| GI_4757861-S | 219    | 205.9  | 260.9  | BPHL     | <a href="#">NM_004332.1</a> | MCNAA                             | hydrolase   |              | amino         |
| GI_4757863-S | 109.1  | 115.1  | 116.5  | VCY2     | <a href="#">NM_004678.1</a> | BPY2                              |             |              | fertilization |
| GI_4757865-S | 331    | 365.7  | 365.6  | BRPF1    | <a href="#">NM_004634.1</a> | BR140                             | transcripti | nucleus      | regulation    |
| GI_4757873-S | 321.7  | 379.6  | 368.2  | BST1     | <a href="#">NM_004334.1</a> | CD157                             | GPI-        | peripheral   | humoral       |
| GI_4757877-S | 402.8  | 404.2  | 521.4  | BUB1     | <a href="#">NM_004336.1</a> |                                   | protein     | kinetochor   | mitotic       |
| GI_4757879-S | 5410.1 | 5621.8 | 5776.3 | BUB3     | <a href="#">NM_004725.1</a> | BUB3L                             |             | kinetochor   | mitotic       |
| GI_4757883-S | 112.3  | 122.4  | 119.4  | C18orf1  | <a href="#">NM_004338.1</a> |                                   | molecular   | integral to  | biological_   |
| GI_4757889-S | 283    | 280.4  | 260.4  | C8orf1   | <a href="#">NM_004337.1</a> | ht41                              | molecular   | cellular_co  | germ-cell     |
| GI_4757893-S | 119    | 126.9  | 125.7  | CACNA2D1 | <a href="#">NM_000722.1</a> | CACNA2;CACNL2A                    | dihydropyr  | voltage-     | small         |
| GI_4757897-S | 96.2   | 109.5  | 107.7  | CALB3    | <a href="#">NM_004057.1</a> | CABP1;CABP9K                      | calcium     |              |               |
| GI_4757901-S | 1728.6 | 2914.4 | 3868.1 | CETN2    | <a href="#">NM_004344.1</a> | CALT;CEN2                         | calcium     | centrosom    | cytokinesi    |
| GI_4757909-S | 256.8  | 309.9  | 281.2  | CART     | <a href="#">NM_004291.1</a> |                                   |             | extracellul  | signal        |
| GI_4757913-S | 163.5  | 177.9  | 161.5  | CASP5    | <a href="#">NM_004347.1</a> | ICH-3;ICEREL-III;ICE(rel)III      | cysteine-   | intracellula | proteolysis   |
| GI_4757917-S | 1474.1 | 4535.1 | 3188.9 | RUNX3    | <a href="#">NM_004350.1</a> | AML2;CBFA3;PEBP2aC                | ATP         | nucleus      | transcripti   |
| GI_4757921-S | 333.5  | 389.9  | 381    | CBLN1    | <a href="#">NM_004352.1</a> |                                   |             | membran      | synaptic      |
| GI_4757935-S | 201.9  | 328.1  | 278.9  | CCNG2    | <a href="#">NM_004354.1</a> |                                   | cyclin-     |              | cell cycle    |
| GI_4757937-A | 80.2   | 78.8   | 79.8   | CCR2     | <a href="#">NM_000648.1</a> | CKR2;CCR2A;CCR2B;CKR2A;CKR2B;CMKB | chemokin    | soluble      | negative      |
| GI_4757937-I | 94.4   | 91.2   | 98     | CCR2     | <a href="#">NM_000648.1</a> | CKR2;CCR2A;CCR2B;CKR2A;CKR2B;CMKB | chemokin    | soluble      | negative      |
| GI_4757973-S | 93.7   | 88.4   | 83     | CETN1    | <a href="#">NM_004066.1</a> | CEN1;CETN                         | calcium     | centrosom    | centrosom     |
| GI_4757975-S | 102.8  | 90.9   | 88.4   | CETN3    | <a href="#">NM_004365.1</a> | CEN3                              | calcium     | centriole    | centrosom     |
| GI_4757979-S | 260    | 332    | 303.3  | CHN2     | <a href="#">NM_004067.1</a> | ARHGAP3;RHOGAP3                   | SH3/SH2     |              | intracellula  |
| GI_4757997-S | 109.1  | 116.2  | 110.9  | CLCA3    | <a href="#">NM_004921.1</a> |                                   | transporte  | extracellul  | small         |
| GI_4758003-S | 144.7  | 141.1  | 237.7  | CLGN     | <a href="#">NM_004362.1</a> |                                   | chaperone   | integral to  | fertilization |
| GI_4758007-S | 1379.8 | 1284.9 | 1277   | CLK1     | <a href="#">NM_004071.1</a> | CLK;STY                           | protein     | nucleus      | regulation    |
| GI_4758013-S | 126.6  | 129.3  | 134.8  | CMKLR1   | <a href="#">NM_004072.1</a> | DEZ;ChemR23                       | chemokin    | integral to  | chemotaxi     |
| GI_4758021-S | 128.2  | 177.2  | 252.7  | COCH     | <a href="#">NM_004086.1</a> | DFNA9;DFNA31;COCH5B2;COCH-5B2     |             |              | hearing       |
| GI_4758023-S | 322.9  | 317.8  | 359.5  | COIL     | <a href="#">NM_004645.1</a> | CLN80;p80-coilin                  | DNA         | nucleus      | regulation    |
| GI_4758031-S | 1611.1 | 2576.9 | 2244.3 | COPB2    | <a href="#">NM_004766.1</a> | beta'-COP                         | protein     | cytosol      | exocytosis    |
| GI_4758043-S | 6358.9 | 7508   | 6849.4 | COX8     | <a href="#">NM_004074.1</a> | COX VIII                          | cytochrom   | mitochondr   | energy        |
| GI_4758051-S | 276.1  | 308.1  | 296.6  | CRABP1   | <a href="#">NM_004378.1</a> | RBP5;CRABP;CRABPI;CRABP-I         | retinoid    | cytoplasm    | signal        |
| GI_4758055-S | 648.3  | 689.4  | 632.5  | CREBBP   | <a href="#">NM_004380.1</a> | CBP;RTS;RSTS                      | transcripti | cytoplasm    | regulation    |
| GI_4758069-S | 110.3  | 147.9  | 135.4  | GPR44    | <a href="#">NM_004778.1</a> | CRTH2                             | G-protein   | integral to  | G-protein     |
| GI_4758077-S | 1369.7 | 1257   | 1229.8 | CSK      | <a href="#">NM_004383.1</a> |                                   | protein C-  | cytoplasm    | protein       |
| GI_4758079-S | 657.8  | 602.6  | 405.3  | CSNK1G3  | <a href="#">NM_004384.1</a> |                                   | protein     |              | signal        |
| GI_4758083-S | 305.2  | 393.8  | 346.3  | CSPG3    | <a href="#">NM_004386.1</a> | NCAN                              | chondroiti  |              | cell          |

|              |         |        |        |          |                             |                                   |             |             |             |
|--------------|---------|--------|--------|----------|-----------------------------|-----------------------------------|-------------|-------------|-------------|
| GI_4758085-S | 11254.5 | 7132.5 | 6389.9 | CSRP1    | <a href="#">NM_004078.1</a> | CRP;CRP1;CSRP;D1S181E             | zinc ion    | nucleus     |             |
| GI_4758087-S | 116.1   | 106.7  | 107.6  | CST      | <a href="#">NM_004861.1</a> | GAL3ST1                           | sulfotransf | membran     | N-linked    |
| GI_4758089-S | 222     | 230.9  | 210.7  | NKX2-5   | <a href="#">NM_004387.1</a> | CSX;CSX1;NKX2E;NKX2.5             | transcripti | nucleus     | heart       |
| GI_4758091-S | 497.6   | 516.7  | 460.3  | CTBS     | <a href="#">NM_004388.1</a> | CTB                               | hydrolase   | lysosome    | carbohydr   |
| GI_4758099-S | 107.7   | 105.1  | 96.7   | CXorf1   | <a href="#">NM_004709.1</a> |                                   | molecular   | cellular_co | biological_ |
| GI_4758115-S | 795     | 1142.6 | 1578   | DAG1     | <a href="#">NM_004393.1</a> | A3a;DAG;AGRNR                     | laminin     | extracellul | muscle      |
| GI_4758119-S | 5843.6  | 4677.9 | 7047.2 | DAP      | <a href="#">NM_004394.1</a> |                                   |             |             | induction   |
| GI_4758135-A | 674.4   | 532.7  | 558.9  | DDX11    | <a href="#">NM_004399.1</a> | CHL1;KRG2;CHLR1;MGC9335           | helicase    | nucleolus   | mitotic     |
| GI_4758147-S | 986     | 848    | 678.8  | DFFA     | <a href="#">NM_004401.1</a> | DFF1;ICAD;DFF-45                  | caspase-    | cytosol     | DNA         |
| GI_4758149-S | 272.5   | 242    | 224.2  | DFFB     | <a href="#">NM_004402.1</a> | CAD;CPAN;DFF2;DFF40;DFF-40        | caspase-    | cytosol     | DNA         |
| GI_4758153-S | 6070.5  | 4580.1 | 4242.8 | DFNA5    | <a href="#">NM_004403.1</a> | ICERE-1                           |             |             | hearing     |
| GI_4758161-S | 226.9   | 325.5  | 235    | DLG1     | <a href="#">NM_004087.1</a> | hdlg;SAP97                        | cytoskelet  | cytoplasm   | cell shape  |
| GI_4758169-A | 246.9   | 757.5  | 645.9  | DMBT1    | <a href="#">NM_004406.1</a> | GP340                             | tumor       |             |             |
| GI_4758171-S | 101.3   | 118.2  | 102    | DMP1     | <a href="#">NM_004407.1</a> |                                   | integrin    | extracellul | ossificatio |
| GI_4758173-S | 457.1   | 390.6  | 310.6  | DMPK     | <a href="#">NM_004409.1</a> | DM;DM1;DMK                        | protein     | kinesin     | muscle      |
| GI_4758175-A | 96.2    | 103.7  | 96.6   | DNAH9    | <a href="#">NM_004662.1</a> | DYH9;HL20;DNAL1;DNEL1;HL-         | adenosine   | cytoskelet  | spermatog   |
| GI_4758175-I | 190.8   | 235.4  | 204.1  | DNAH9    | <a href="#">NM_004662.1</a> | DYH9;HL20;DNAL1;DNEL1;HL-         | adenosine   | cytoskelet  | spermatog   |
| GI_4758177-S | 93.4    | 112.1  | 97.5   | DNCI1    | <a href="#">NM_004411.1</a> | DNCIC1                            | motor       | cytoplasmic | microtubul  |
| GI_4758181-S | 255.1   | 387.3  | 357.6  | DNM1     | <a href="#">NM_004408.1</a> | DNM                               | GTP         | coated pit  | receptor    |
| GI_4758189-S | 105.1   | 107.9  | 93.2   | DPEP1    | <a href="#">NM_004413.1</a> | MDP;RDP                           | membran     | peripheral  | proteolysis |
| GI_4758191-S | 492.1   | 548.6  | 510    | STK17A   | <a href="#">NM_004760.1</a> | DRAK1                             | protein     | nucleus     | induction   |
| GI_4758199-S | 264.2   | 330.2  | 274    | DSP      | <a href="#">NM_004415.1</a> | DPI;DPII;KPPS2;PPKS2              | structural  | intermedia  | epidermal   |
| GI_4758211-S | 131     | 161.9  | 129.8  | DUSP8    | <a href="#">NM_004420.1</a> | HB5;HVH8;HVH-5                    | protein     | nucleus     | inactivatio |
| GI_4758215-S | 459.1   | 484.1  | 445    | DVL2     | <a href="#">NM_004422.1</a> |                                   | signal      | cytoplasm   | imaginal    |
| GI_4758219-S | 4498.2  | 3426.8 | 3725.6 | DXS9928E | <a href="#">NM_004699.1</a> | 9F;XAP5;HXC-26                    |             | nucleus     |             |
| GI_4758231-S | 154.1   | 210.7  | 175.8  | ECEL1    | <a href="#">NM_004826.1</a> | XCE;ECEX                          | metallope   | integral to | neuropepti  |
| GI_4758239-S | 373.1   | 459.8  | 428.9  | EDG5     | <a href="#">NM_004230.1</a> | H218;LPB2;S1P2;AGR16;EDG-5;Gpcr13 | lipid       | integral to | activation  |
| GI_4758261-S | 199.4   | 242.6  | 217.9  | ELAVL2   | <a href="#">NM_004432.1</a> | HUB;HELN1;HEL-N1                  | mRNA 3'     |             | regulation  |
| GI_4758267-S | 186.3   | 163.1  | 141.6  | EML1     | <a href="#">NM_004434.1</a> | EMAP;ELP79;EMAPL;HuEMAP           |             | microtubul  | vision      |
| GI_4758269-S | 1588.2  | 1282.8 | 2056.7 | ENDOG    | <a href="#">NM_004435.1</a> |                                   | endonucle   | mitochond   | DNA         |
| GI_4758271-S | 210.3   | 228.2  | 247    | ENSA     | <a href="#">NM_004436.1</a> |                                   | ion         |             | response    |
| GI_4758273-S | 362.7   | 387.4  | 335.7  | EPB41    | <a href="#">NM_004437.1</a> | HE;EL1;4.1R                       | structural  | spectrin    | circulation |
| GI_4758291-S | 203.8   | 728.7  | 343.6  | EPHB6    | <a href="#">NM_004445.1</a> | HEP                               | ephrin      | integral to | transmem    |
| GI_4758293-S | 5034.3  | 4223.7 | 3720.9 | EPRS     | <a href="#">NM_004446.1</a> | PARS;QARS;QPRS                    | ATP         | soluble     | glutamyl-   |
| GI_4758297-S | 154.3   | 178.2  | 157.1  | ERBB2    | <a href="#">NM_004448.1</a> | NEU;NGL;HER2;TKR1;HER-2           | Neu/ErbB-   |             | enzyme      |
| GI_4758301-S | 4021.7  | 5353.4 | 4402.1 | ERH      | <a href="#">NM_004450.1</a> | DROER                             | molecular   |             | pyrimidine  |
| GI_4758311-S | 499.4   | 533.6  | 389.4  | ETFDH    | <a href="#">NM_004453.1</a> | MADD;ETFQO                        | electron    | mitochond   | electron    |
| GI_4758313-S | 1534.8  | 1075.6 | 1211.3 | IER2     | <a href="#">NM_004907.1</a> | ETR101                            |             |             |             |
| GI_4758315-S | 3626.7  | 2433.4 | 3062.2 | ETV5     | <a href="#">NM_004454.1</a> | ERM                               | DNA         | nucleus     | regulation  |
| GI_4758317-S | 117.5   | 125.4  | 109.5  | EXTL1    | <a href="#">NM_004455.1</a> | EXTL                              | tumor       | endoplas    | skeletal    |
| GI_4758331-A | 536.1   | 612    | 600.2  | ACSL4    | <a href="#">NM_004458.1</a> | ACS4;FACL4;LACS4;MRX63            | long-chain- |             | learning    |
| GI_4758339-S | 3517.3  | 3157   | 2811.4 | FARSLA   | <a href="#">NM_004461.1</a> | FRSA;CML33;FARSL;PheHA            | phenylala   | soluble     | pathogene   |
| GI_4758343-S | 140.6   | 141.2  | 141.1  | FCER1G   | <a href="#">NM_004106.1</a> |                                   | receptor    | integral to | immune      |
| GI_4758359-S | 95.9    | 109.8  | 96.4   | FGF10    | <a href="#">NM_004465.1</a> |                                   | fibroblast  | extracellul | histogene   |

|              |        |        |        |         |                             |                                   |             |              |             |
|--------------|--------|--------|--------|---------|-----------------------------|-----------------------------------|-------------|--------------|-------------|
| GI_4758373-S | 927.6  | 1131.1 | 589.8  | FHL3    | <a href="#">NM_004468.1</a> | SLIM2                             |             |              | muscle      |
| GI_4758387-S | 122.9  | 151.9  | 134.9  | FOXD2   | <a href="#">NM_004474.1</a> | FKHL17;FREAC9                     | transcripti | nucleus      | regulation  |
| GI_4758391-S | 6444.8 | 4441.5 | 2804.6 | FOXD1   | <a href="#">NM_004472.1</a> | FKHL8;FREAC4                      | DNA         | nucleus      | regulation  |
| GI_4758393-S | 4559.6 | 4713.4 | 5761.7 | FLOT2   | <a href="#">NM_004475.1</a> | ESA;ECS1;ESA1;ECS-1;M17S1         | cell        | plasma       | epidermal   |
| GI_4758395-S | 122.4  | 122.1  | 109.1  | FLT3    | <a href="#">NM_004119.1</a> | FLK2;STK1;CD135                   | vascular    | integral to  | transmem    |
| GI_4758397-S | 126.4  | 132.1  | 128.2  | FOLH1   | <a href="#">NM_004476.1</a> | PSM;FOLH;GCP2;PSMA;NAALAD1;NAALAd | catalytic   | membran      | proteolysis |
| GI_4758403-S | 2879.3 | 2512.6 | 2540.1 | FRG1    | <a href="#">NM_004477.1</a> | FSG1                              |             |              | pathogene   |
| GI_4758405-S | 152    | 175.4  | 160.4  | FUT7    | <a href="#">NM_004479.1</a> |                                   | fucosyltra  | Golgi        | protein     |
| GI_4758415-S | 938.3  | 906.2  | 1001.1 | GBF1    | <a href="#">NM_004193.1</a> | KIAA0248                          | ARF         | Golgi        | retrograde  |
| GI_4758419-S | 87.5   | 90.8   | 77.2   | GCM2    | <a href="#">NM_004752.1</a> | GCMB;hGCMB                        | DNA         | nucleus      | developm    |
| GI_4758421-S | 207.3  | 261.4  | 223    | GCNT3   | <a href="#">NM_004751.1</a> | GnT-M;C2/4GnT;C2GnT-M             | N-          | membran      | O-linked    |
| GI_4758431-S | 259.7  | 300.9  | 270.3  | GGTLA1  | <a href="#">NM_004121.1</a> | GGT5;GGT-REL;DKFZP566O011         | gamma-      | integral to  | glutathion  |
| GI_4758433-A | 137.6  | 154.8  | 146.8  | GHSR    | <a href="#">NM_004122.1</a> |                                   | G-protein   | integral to  | G-protein   |
| GI_4758433-I | 302.6  | 356    | 306.9  | GHSR    | <a href="#">NM_004122.1</a> |                                   | G-protein   | integral to  | G-protein   |
| GI_4758435-S | 318.3  | 409.9  | 366.3  | GIP     | <a href="#">NM_004123.1</a> |                                   | peptide     | soluble      | energy      |
| GI_4758437-S | 90.5   | 90.1   | 98.9   | GLP2R   | <a href="#">NM_004246.1</a> |                                   | G-protein   | integral to  | positive    |
| GI_4758439-S | 116.4  | 217    | 90.8   | GMFG    | <a href="#">NM_004877.1</a> | GMF-GAMMA                         | enzyme      | intracellula | protein     |
| GI_4758453-S | 1437.7 | 2014.2 | 1749.9 | GOLGB1  | <a href="#">NM_004487.1</a> | GCP;GCP372;GIANTIN                |             | Golgi        | Golgi       |
| GI_4758455-S | 1181.8 | 1299.8 | 1188.7 | GOSR1   | <a href="#">NM_004871.1</a> | P28;GS28;GOS28;GOS28/P28          | v-SNARE     | ER-Golgi     | intra-Golgi |
| GI_4758459-S | 94.9   | 96     | 93.9   | GP5     | <a href="#">NM_004488.1</a> | CD42d                             | cell        | integral to  | blood       |
| GI_4758467-S | 144.6  | 172.1  | 158.3  | GPR50   | <a href="#">NM_004224.1</a> | H9                                | G-protein   | integral to  | G-protein   |
| GI_4758473-S | 498    | 567.3  | 524.2  | GPR10   | <a href="#">NM_004248.1</a> | GR3;PrRPR                         | neuropepti  | integral to  | pregnancy   |
| GI_4758477-S | 223.1  | 209.3  | 231.2  | GRB14   | <a href="#">NM_004490.1</a> |                                   | SH3/SH2     |              | signal      |
| GI_4758479-S | 126    | 142.6  | 125.2  | GRIA2   | <a href="#">NM_000826.1</a> | GLUR2;GLURB;HBGR2                 | glutamate   | plasma       | synaptic    |
| GI_4758483-S | 5583.3 | 4682   | 4020.7 | GSTO1   | <a href="#">NM_004832.1</a> | P28;GSTTLp28                      | glutathion  | cytoplasm    | glutathion  |
| GI_4758485-S | 2255   | 2368.6 | 2138.5 | GTF2A2  | <a href="#">NM_004492.1</a> | TFIIA                             |             |              |             |
| GI_4758487-S | 3067.4 | 3270   | 3433.2 | GTF2F2  | <a href="#">NM_004128.1</a> | BTF4;RAP30;TFIIF                  |             |              |             |
| GI_4758497-S | 161.9  | 176.9  | 180.8  | H6PD    | <a href="#">NM_004285.1</a> | GDH;G6PDH                         | glucose-6-  | endoplas     | pentose-    |
| GI_4758499-A | 551.2  | 663.6  | 522.6  | CREB5   | <a href="#">NM_004904.1</a> | CRE-BPA                           | transcripti | nucleus      | transcripti |
| GI_4758499-I | 86     | 83.6   | 85.9   | CREB5   | <a href="#">NM_004904.1</a> | CRE-BPA                           | transcripti | nucleus      | transcripti |
| GI_4758503-S | 1631.8 | 2059.8 | 2761.8 | HADH2   | <a href="#">NM_004493.1</a> | ERAB;MHBD;17b-HSD10               | 7-alpha-    | cytoplasm    | lipid       |
| GI_4758505-S | 207.7  | 218.4  | 197.7  | HAND1   | <a href="#">NM_004821.1</a> | Hxt;eHand;Thing1                  | transcripti | nucleus      | heart       |
| GI_4758507-S | 110.7  | 134.1  | 113.3  | HAT     | <a href="#">NM_004262.1</a> |                                   | peptidase   | extracellul  | respiratory |
| GI_4758513-S | 106.1  | 110.7  | 98.3   | ZNF254  | <a href="#">NM_004876.1</a> | BMZF-5;ZNF91L;HD-ZNF1             | DNA         | nucleus      | negative    |
| GI_4758515-S | 6858.5 | 6468.4 | 6687.3 | HDGF    | <a href="#">NM_004494.1</a> | HMG1L2                            | heparin     | extracellul  | signal      |
| GI_4758525-I | 123.7  | 123.1  | 110.1  | NRG1    | <a href="#">NM_004495.1</a> | GGF;HGL;HRG;NDF;ARIA;GGF2;HRGA;SM |             |              |             |
| GI_4758547-S | 125.6  | 255    | 281.1  | HOMER2  | <a href="#">NM_004839.1</a> | CPD;ACPD;Vesl-2;Cupidin;HOMER-    |             |              | metabotro   |
| GI_4758555-S | 875.9  | 1025.9 | 969.1  | PRPF3   | <a href="#">NM_004698.1</a> | PRP3;RP18;HPRP3;Prp3p;HPRP3P      | pre-mRNA    | ribonucleo   | mRNA        |
| GI_4758559-S | 747.9  | 675.5  | 652.2  | HPRP8BP | <a href="#">NM_004814.1</a> | SPF38;PRPF8BP                     | pre-mRNA    | snRNP U5     | RNA         |
| GI_4758563-S | 109.5  | 130.5  | 131.6  | USP6    | <a href="#">NM_004505.1</a> | HRP1;TRE2;TRE-2;TRE17             |             |              |             |
| GI_4758565-S | 193.7  | 238.5  | 211.8  | HS6ST1  | <a href="#">NM_004807.1</a> | HS6ST                             | sulfotransf | integral to  | heparan     |
| GI_4758579-S | 144.4  | 321.5  | 213.9  | C1orf38 | <a href="#">NM_004848.1</a> | ICB-1                             |             |              | cell        |
| GI_4758589-S | 107.2  | 101.1  | 100.5  | IGSF2   | <a href="#">NM_004258.1</a> | V7;CD101                          | plasma      | integral to  | cell        |
| GI_4758605-S | 6134.4 | 6717   | 6537.6 | ILK     | <a href="#">NM_004517.1</a> | P59                               | protein     | peripheral   | integrin-   |

|              |        |        |        |          |                             |                                  |             |              |             |
|--------------|--------|--------|--------|----------|-----------------------------|----------------------------------|-------------|--------------|-------------|
| GI_4758613-S | 568.5  | 603.9  | 572.3  | ITGBL1   | <a href="#">NM_004791.1</a> | OSCP;TIED                        | cell        | integrin     | cell        |
| GI_4758617-S | 333.3  | 387.4  | 347.8  | K6HF     | <a href="#">NM_004693.1</a> |                                  | structural  | intermedia   |             |
| GI_4758623-S | 127.8  | 147.1  | 140.9  | KCNK6    | <a href="#">NM_004823.1</a> | TOSS;KCNK8;TWIK2;TWIK-2;FLJ12282 | inward      | voltage-     | potassium   |
| GI_4758643-S | 926.2  | 881.2  | 856.7  | KIF2     | <a href="#">NM_004520.1</a> | HK2                              | adenosine   | cytoskelet   | microtubul  |
| GI_4758647-S | 540.5  | 678.2  | 527.2  | KIF5B    | <a href="#">NM_004521.1</a> | KNS;KINH;KNS1;UKHC;U-KHC         | microtubul  | kinesin      | microtubul  |
| GI_4758661-S | 283.3  | 347    | 356.2  | LYSAL1   | <a href="#">NM_004901.1</a> | LAP70;LALP70;KIAA0392            | apyrase     | lysosome     | nucleobas   |
| GI_4758669-S | 1357.2 | 3070.7 | 1079.4 | LPXN     | <a href="#">NM_004811.1</a> | LDPL                             |             | cytoplasm    | cell        |
| GI_4758675-S | 112.6  | 136.7  | 115.8  | LIPF     | <a href="#">NM_004190.1</a> | HGL;HLAL                         | triacylglyc | cellular_co  | triacylglyc |
| GI_4758679-S | 242.5  | 334.8  | 261.7  | LLGL2    | <a href="#">NM_004524.1</a> | HGL                              |             |              |             |
| GI_4758683-S | 97.9   | 97.7   | 90.9   | LRAT     | <a href="#">NM_004744.1</a> |                                  | acyltransf  |              |             |
| GI_4758685-S | 720.1  | 678.6  | 374.8  | LRP1     | <a href="#">NM_002332.1</a> | APR;LRP;A2MR;CD91;APOER          | lipoprotein | coated pit   | pathogene   |
| GI_4758689-S | 894.9  | 841.6  | 695.1  | LRRFIP1  | <a href="#">NM_004735.1</a> | GCF2;TRIP;GCF-2;FLAP-1;HUPI-     | double-     | cytoskelet   | regulation  |
| GI_4758697-S | 1420.6 | 1621.8 | 2263.4 | MAN2A1   | <a href="#">NM_002372.1</a> | MANA2                            | mannosyl-   | Golgi        | glycoprote  |
| GI_4758703-S | 145.1  | 136.2  | 169.3  | MFHAS1   | <a href="#">NM_004225.1</a> | MASL1                            | small       | nucleus      | oncogene    |
| GI_4758707-S | 120.3  | 144    | 135    | LY86     | <a href="#">NM_004271.1</a> | MD-1;dJ80N2.1                    | signal      | plasma       | humoral     |
| GI_4758711-S | 109.5  | 122    | 113    | MGAM     | <a href="#">NM_004668.1</a> | MG;MGA                           | catalytic   | integral to  | starch      |
| GI_4758719-S | 637.3  | 649.7  | 728.9  | MLLT3    | <a href="#">NM_004529.1</a> | AF9                              | translation | nucleus      | oncogene    |
| GI_4758727-S | 170.1  | 195.3  | 186.8  | MMPL1    | <a href="#">NM_004142.1</a> | MMP20                            | metallope   | extracellul  | proteolysis |
| GI_4758733-S | 3113.8 | 3034.2 | 2865.5 | PMPCB    | <a href="#">NM_004279.1</a> | MPPB;MPP11;MPPP52                | peptidase   | mitochond    | proteolysis |
| GI_4758747-S | 164.6  | 181.6  | 166.4  | MYBPC2   | <a href="#">NM_004533.1</a> | MYBPC;MYBPCF                     | structural  | striated     | striated    |
| GI_4758751-S | 259    | 316.7  | 267.4  | BIRC1    | <a href="#">NM_004536.1</a> | NAIP                             | apoptosis   | intracellula | anti-       |
| GI_4758765-S | 99.6   | 113.4  | 82.9   | NDST3    | <a href="#">NM_004784.1</a> |                                  | heparin N-  |              | protein     |
| GI_4758771-S | 583.2  | 695.5  | 675.6  | NDUFA3   | <a href="#">NM_004542.1</a> | B9                               | NADH        | NADH         |             |
| GI_4758773-S | 1632.5 | 2369.5 | 1915.7 | NDUFB10  | <a href="#">NM_004548.1</a> | PDSW                             | NADH        | NADH         |             |
| GI_4758787-S | 2049.4 | 2205.8 | 1942.9 | NDUFS3   | <a href="#">NM_004551.1</a> |                                  | iron-sulfur | NADH         | mitochond   |
| GI_4758789-S | 3120.4 | 4057.4 | 3576.3 | NDUFS5   | <a href="#">NM_004552.1</a> |                                  | NADH        | NADH         | mitochond   |
| GI_4758797-S | 108.2  | 104.3  | 119    | DPF1     | <a href="#">NM_004647.1</a> | NEUD4;neuro-d4                   | DNA         | nucleus      | induction   |
| GI_4758805-S | 581.2  | 393.4  | 338.1  | NFKBIE   | <a href="#">NM_004556.1</a> | IKBE                             | transcripti | cytoplasm    |             |
| GI_4758813-S | 375.4  | 491.9  | 377.7  | NMI      | <a href="#">NM_004688.1</a> |                                  | transcripti | cytoplasm    | JAK-STAT    |
| GI_4758815-S | 1274.2 | 1226.2 | 914.9  | NMT2     | <a href="#">NM_004808.1</a> |                                  | catalytic   |              | protein-    |
| GI_4758819-I | 119.7  | 102.8  | 107.5  | GPR74    | <a href="#">NM_004885.1</a> | NPFF2;NPGPR                      | G-protein   | integral to  | perception  |
| GI_4758821-S | 94.7   | 100.3  | 98.5   | NPHS1    | <a href="#">NM_004646.1</a> | CNF;NPHN                         | cell        | integral to  | excretion   |
| GI_4758825-S | 102.8  | 100.6  | 94.7   | NRTN     | <a href="#">NM_004558.1</a> | NTN                              | receptor    |              | transmem    |
| GI_4758839-S | 126.3  | 134.1  | 124.7  | NTN1     | <a href="#">NM_004822.1</a> | NTN1L                            | structural  | soluble      | oncogene    |
| GI_4758847-S | 106.4  | 107.4  | 111.8  | ONECUT2  | <a href="#">NM_004852.1</a> | OC2;OC-2                         | RNA         | nucleus      | histogene   |
| GI_4758851-S | 241.6  | 273.8  | 264.2  | SLC22A13 | <a href="#">NM_004256.1</a> | OCTL1;OCTL3;ORCTL3               | organic     | membran      | small       |
| GI_4758859-S | 391.5  | 371.6  | 326.8  | NOLC1    | <a href="#">NM_004741.1</a> | P130;NOPP130;NOPP140;KIAA0035    | GTP         | nucleolus    | rRNA        |
| GI_4758865-S | 673.5  | 1295.8 | 813.6  | C5orf13  | <a href="#">NM_004772.1</a> | P311;PTZ17;D4S114;PRO1873        |             |              |             |
| GI_4758867-S | 1939.8 | 2072.8 | 1741.6 | P4HA2    | <a href="#">NM_004199.1</a> |                                  | procollage  | endoplas     | protein     |
| GI_4758873-S | 2159.9 | 3124.7 | 2164.1 | TM9SF2   | <a href="#">NM_004800.1</a> | P76                              | transporte  | endosome     | small       |
| GI_4758875-S | 457.9  | 497.9  | 436.4  | PABPN1   | <a href="#">NM_004643.1</a> | OPMD;PAB2;PABP2                  | RNA         | nucleus      | RNA         |
| GI_4758877-S | 206.9  | 219.6  | 218.1  | PAFAH2   | <a href="#">NM_000437.2</a> | HSD-PLA2                         | phospholi   | soluble      | lipid       |
| GI_4758883-I | 114.2  | 127.9  | 119.9  | PARK2    | <a href="#">NM_004562.1</a> | PDJ;PRKN;AR-JP                   | ubiquitin-  |              | central     |
| GI_4758885-S | 3890.3 | 2682.4 | 1307.6 | PCK2     | <a href="#">NM_004563.1</a> | PEPCK;PEPCK2                     | phosphoe    | mitochond    | glucose     |

|              |         |        |        |          |                             |                                      |             |              |              |
|--------------|---------|--------|--------|----------|-----------------------------|--------------------------------------|-------------|--------------|--------------|
| GI_4758893-S | 572     | 620.2  | 467.1  | PET112L  | <a href="#">NM_004564.1</a> | PET112                               | translation | mitochond    | protein      |
| GI_4758895-S | 455.8   | 492.8  | 484.3  | PEX14    | <a href="#">NM_004565.1</a> | NAPP2                                |             | integral to  |              |
| GI_4758897-A | 1150.2  | 928.2  | 1031.8 | PEX16    | <a href="#">NM_004813.1</a> |                                      |             | integral to  | peroxisom    |
| GI_4758897-I | 1678.8  | 1440   | 1661   | PEX16    | <a href="#">NM_004813.1</a> |                                      |             | integral to  | peroxisom    |
| GI_4758899-S | 122.3   | 124.7  | 108.6  | PFKFB3   | <a href="#">NM_004566.1</a> | IPFK2                                | fructose-   | cellular_co  | fructose     |
| GI_4758907-I | 200.5   | 217.7  | 176.8  | MIZ1     | <a href="#">NM_004671.1</a> | SIZ2;PIASX-BETA;PIASX-ALPHA          | zinc ion    | nucleus      |              |
| GI_4758913-S | 1824.7  | 3980.4 | 3080.4 | LITAF    | <a href="#">NM_004862.1</a> | PIG7;CMT1C;SIMPLE;TP53I7;FLJ38636    | RNA         | nucleus      | regulation   |
| GI_4758925-S | 231     | 295.8  | 259.2  | PITPNM1  | <a href="#">NM_004910.1</a> | NIR2;RDGB;DRES9;RDGB1;PITPNM;RDGB    | phosphati   | intracellula | phototrans   |
| GI_4758931-S | 146.9   | 154.8  | 127.3  | PKP2     | <a href="#">NM_004572.1</a> |                                      | structural  | cytoskelet   | cell-cell    |
| GI_4758935-S | 22246.6 | 15648  | 10315  | GDF15    | <a href="#">NM_004864.1</a> | PDF;MIC1;PLAB;MIC-1;NAG-1;PTGFB;GDF- | cytokine    | extracellul  | transformi   |
| GI_4758937-S | 128.5   | 139.8  | 121    | PLCB2    | <a href="#">NM_004573.1</a> |                                      | phospholi   |              | phosphati    |
| GI_4758939-S | 1274.7  | 1390.8 | 1179.5 | C14orf2  | <a href="#">NM_004894.1</a> | MP68;PLPM                            |             | mitochond    |              |
| GI_4758943-S | 117.3   | 142.7  | 114.2  | REPS2    | <a href="#">NM_004726.1</a> | POB1                                 | calcium     |              | EGF          |
| GI_4758947-S | 100.2   | 102.5  | 102.2  | POU4F2   | <a href="#">NM_004575.1</a> | BRN3B;BRN3.2;Brn-3b                  | transcripti |              | eye          |
| GI_4758951-S | 2312.5  | 2656.6 | 2717.9 | PPP2CB   | <a href="#">NM_004156.1</a> | PP2CB                                | protein     |              | protein      |
| GI_4758955-S | 567.2   | 217.3  | 142.4  | BZRAP1   | <a href="#">NM_004758.1</a> | PRAX-1;KIAA0612                      | receptor    | mitochond    | biological_  |
| GI_4758957-S | 226.4   | 265.9  | 273.2  | PRKAR2A  | <a href="#">NM_004157.1</a> | PRKAR2                               | cAMP-       | cytoplasm    | intracellula |
| GI_4758981-S | 152.4   | 178.7  | 156    | PYY      | <a href="#">NM_004160.1</a> |                                      | peptide     | soluble      | regulation   |
| GI_4758985-S | 130.4   | 147.4  | 141.2  | RAB11B   | <a href="#">NM_004218.1</a> | H-YPT3                               | RAB small   |              | small        |
| GI_4758993-S | 115.6   | 112.3  | 102.9  | RAB28    | <a href="#">NM_004249.1</a> |                                      | RAB small   |              |              |
| GI_4759025-S | 155.4   | 222.4  | 138.8  | RASAL1   | <a href="#">NM_004658.1</a> | RASAL                                | Ras         |              | signal       |
| GI_4759029-S | 173.4   | 207.1  | 210.4  | RECQL4   | <a href="#">NM_004260.1</a> | RTS;RECQ4                            | DNA         | nucleus      | DNA          |
| GI_4759033-S | 1474.8  | 1513.8 | 1179.9 | ETF1     | <a href="#">NM_004730.1</a> | ERF;RF1;ERF1;TB3-1;D5S1995;SUP45L1   | translation | cytoplasm    | regulation   |
| GI_4759039-S | 256.3   | 260.2  | 374.5  | RIN1     | <a href="#">NM_004292.1</a> |                                      | protein     | peripheral   | signal       |
| GI_4759049-S | 215.9   | 295.2  | 287.7  | RPS6KA3  | <a href="#">NM_004586.1</a> | RSK;HU-2;HU-3;RSK2;MRX19;ISPK-       | protein     |              | central      |
| GI_4759053-S | 133     | 162.7  | 131.9  | RRAD     | <a href="#">NM_004165.1</a> | RAD;RAD1;REM3                        | small       |              | small        |
| GI_4759055-S | 253     | 340.2  | 200.1  | RRBP1    | <a href="#">NM_004587.1</a> | ES130;ES/130                         | extracellul | ribosome     | protein      |
| GI_4759057-S | 115.8   | 130.8  | 121.5  | SH3BP5   | <a href="#">NM_004844.1</a> | SAB                                  | SH3/SH2     | cytoplasm    | signal       |
| GI_4759059-I | 701     | 767.8  | 769.9  | MADHIP   | <a href="#">NM_004799.1</a> | SARA;ZFYVE9                          | serine-     | cytoplasm    | SMAD         |
| GI_4759061-A | 1565.6  | 1398.6 | 1638.4 | GPSN2    | <a href="#">NM_004868.1</a> | SC2;TER                              |             | integral to  |              |
| GI_4759067-S | 1457.9  | 1649.8 | 1320.8 | SCO1     | <a href="#">NM_004589.1</a> | SCOD1                                | chaperone   | mitochond    | cytochrom    |
| GI_4759075-S | 164.7   | 253.8  | 114.6  | CCL20    | <a href="#">NM_004591.1</a> | CKb4;LARC;ST38;MIP3A;MIP-3a;SCYA20   | chemokin    | extracellul  | chemotaxi    |
| GI_4759079-S | 2131.7  | 2359.3 | 2479.5 | SDHA     | <a href="#">NM_004168.1</a> | FP;SDH2;SDHF                         | electron    | mitochond    | aerobic      |
| GI_4759091-S | 202     | 284.6  | 167.2  | SEMA3B   | <a href="#">NM_004636.1</a> | SemaA;SEMA5;SEMAA;semaV;LUCA-1       |             | endoplas     | axon         |
| GI_4759097-S | 1364.2  | 1310.1 | 1195.9 | SFRS10   | <a href="#">NM_004593.1</a> | TRA2B;SRFS10;TRA2-BETA;Htra2-beta    | pre-mRNA    | nucleus      | RNA          |
| GI_4759109-S | 886.2   | 942.9  | 937    | MPDU1    | <a href="#">NM_004870.1</a> | SL15;Lec35                           |             |              |              |
| GI_4759111-S | 941.4   | 1273.7 | 1473.8 | SLC16A3  | <a href="#">NM_004207.1</a> | MCT3;MCT4                            | monocarb    | membran      | monocarb     |
| GI_4759113-S | 135.4   | 186.5  | 90.9   | SLC16A4  | <a href="#">NM_004696.1</a> | MCT4                                 | monocarb    | membran      | monocarb     |
| GI_4759127-S | 217.6   | 226.3  | 221.3  | SLC24A1  | <a href="#">NM_004727.1</a> | NCKX;RODX;NCKX1;HsT17412;KIAA0702    | calcium,    | integral to  | small        |
| GI_4759131-S | 90.6    | 84.7   | 94.4   | SLC28A2  | <a href="#">NM_004212.1</a> | CNT2;HCNT2;SPNT1;HsT17153            | purine      | membran      | purine       |
| GI_4759133-S | 107.9   | 111.6  | 103.1  | SLC4A8   | <a href="#">NM_004858.1</a> | NBC3                                 | inorganic   | membran      | anion        |
| GI_4759135-S | 156.3   | 188.1  | 167.6  | SLC6A5   | <a href="#">NM_004211.1</a> | GLYT2                                | glycine:so  | integral to  | small        |
| GI_4759137-S | 193.9   | 235.6  | 197.7  | SLC7A4   | <a href="#">NM_004173.1</a> | CAT4;CAT-4;HCAT3                     | basic       | integral to  | small        |
| GI_4759139-S | 457.8   | 739.1  | 663.1  | SLC9A3R1 | <a href="#">NM_004252.1</a> | EBP50;NHERF                          | protein     | actin        | protein      |



|              |        |        |        |          |                             |                                      |              |             |               |
|--------------|--------|--------|--------|----------|-----------------------------|--------------------------------------|--------------|-------------|---------------|
| GI_4759141-S | 484    | 550.6  | 444.4  | SLC9A3R2 | <a href="#">NM_004785.1</a> | SIP1;OCTS2;SIP-1;TKA-                | protein      | plasma      | protein       |
| GI_4759143-S | 190.8  | 247.9  | 153.7  | SLC9A5   | <a href="#">NM_004594.1</a> | NHE5                                 | sodium:hy    | integral to | small         |
| GI_4759145-S | 129.9  | 133.8  | 175.7  | SLIT2    | <a href="#">NM_004787.1</a> | Slit-2                               | protein      | extracellul | motor         |
| GI_4759171-S | 231.2  | 240.6  | 223.3  | SFRS2IP  | <a href="#">NM_004719.1</a> | SIP1;CASP11;SRRP129                  | pre-mRNA     | DNA-        | mRNA          |
| GI_4759175-I | 182.1  | 228.2  | 196    | STAU     | <a href="#">NM_004602.1</a> |                                      | double-      | microtubul  |               |
| GI_4759177-S | 2078.6 | 1660.3 | 2445.9 | AURKB    | <a href="#">NM_004217.1</a> | AIK2;AIM1;ARK2;AurB;IPL1;AIM-1;STK12 | protein      |             | cell cycle    |
| GI_4759179-A | 605.7  | 616.9  | 490.4  | STK19    | <a href="#">NM_004197.1</a> | G11;RP1;D6S60;D6S60E;HLA-RP1         | protein      | nucleus     | protein       |
| GI_4759181-S | 4679.2 | 4453.8 | 5080.1 | STX1A    | <a href="#">NM_004603.1</a> | STX1;HPC-1;p35-1                     | protein      | kinesin     | nonselecti    |
| GI_4759187-S | 1756.2 | 2224.4 | 1886.9 | STX8     | <a href="#">NM_004853.1</a> | CARB                                 |              | kinesin     | nonselecti    |
| GI_4759195-S | 161.2  | 172.9  | 157.8  | SYMPK    | <a href="#">NM_004819.1</a> | SPK;SYM                              |              |             |               |
| GI_4759211-S | 4119.5 | 3989.7 | 3600.6 | TBCA     | <a href="#">NM_004607.1</a> |                                      | co-          | cytoskelet  | post-         |
| GI_4759215-S | 733.6  | 736    | 690    | TCEAL1   | <a href="#">NM_004780.1</a> | P21;SIIR;pp21                        | RNA          | nucleus     | negative      |
| GI_4759221-S | 143.9  | 138.6  | 141.7  | TCP10    | <a href="#">NM_004610.1</a> |                                      |              | cytosol     |               |
| GI_4759225-S | 136.2  | 187.5  | 148.2  | TGFBR1   | <a href="#">NM_004612.1</a> | ALK-5;ACVRLK4                        | type I       | integral to | TGFbeta       |
| GI_4759229-A | 123.3  | 199.7  | 115.1  | TGM5     | <a href="#">NM_004245.1</a> | TGX;TGM6;TGMX                        | protein-     |             | epidermal     |
| GI_4759247-S | 88.6   | 89.9   | 85.5   | TPH1     | <a href="#">NM_004179.1</a> | TPH;TPRH                             | iron ion     |             | tryptophan    |
| GI_4759255-S | 2142.4 | 1994.8 | 1721.8 | TRAG3    | <a href="#">NM_004909.1</a> |                                      | DNA          | nucleus     | drug          |
| GI_4759263-S | 1463.3 | 1911.8 | 1394.3 | TRIP15   | <a href="#">NM_004236.1</a> | CSN2;SGN2;ALIEN;COPS2;COPS2-         | protein      | signaloso   | signal        |
| GI_4759273-S | 272.3  | 327.7  | 257.8  | TXNL     | <a href="#">NM_004786.1</a> | Txl;TRP32                            | thioredoxi   | cytoplasm   | protein-      |
| GI_4759279-S | 134.5  | 165.6  | 157.5  | U5-116KD | <a href="#">NM_004247.1</a> | KIAA0031                             | GTPase       | spliceoso   | mRNA          |
| GI_4759303-S | 525.6  | 824.9  | 865.9  | VCY      | <a href="#">NM_004679.1</a> | BPY1;VCY1                            | DNA          | nucleus     | regulation    |
| GI_4759305-S | 132.7  | 150.3  | 128    | LIN7A    | <a href="#">NM_004664.1</a> | LIN7;VELI1;LIN-7A;MALS-1;TIP-33      | protein      |             | exocytosis    |
| GI_4759309-S | 163.2  | 149.9  | 131.8  | VMD2     | <a href="#">NM_004183.1</a> | BMD;BEST                             | molecular    | integral to | vision        |
| GI_4759311-S | 141.4  | 145.2  | 157.1  | VNN1     | <a href="#">NM_004666.1</a> | Tiff66                               | hydrolase    |             | cell          |
| GI_4759329-S | 76.5   | 84.1   | 84.7   | XKRY     | <a href="#">NM_004677.1</a> |                                      |              | integral to | fertilization |
| GI_4759335-S | 507.3  | 407.6  | 554.9  | FANCG    | <a href="#">NM_004629.1</a> | FAG;XRCC9                            | tumor        | nucleus     | cell cycle    |
| GI_4809272-S | 1791.4 | 1740.1 | 1682.6 | ANXA4    | <a href="#">NM_001153.2</a> | ANX4                                 | phospholi    |             |               |
| GI_4809273-S | 9209.9 | 7635.1 | 8867.3 | ANXA5    | <a href="#">NM_001154.2</a> | PP4;ANX5;ENX2                        | phospholi    |             | blood         |
| GI_4809275-A | 403.9  | 701.6  | 144.7  | ANXA6    | <a href="#">NM_004033.1</a> | ANX6;CBP68                           | phospholi    |             |               |
| GI_4809277-A | 2475.4 | 2365.8 | 616.3  | ANXA7    | <a href="#">NM_001156.2</a> | SNX;ANX7                             | phospholi    |             |               |
| GI_4809278-I | 113.9  | 140.8  | 127.6  | ANXA7    | <a href="#">NM_004034.1</a> | SNX;ANX7                             | phospholi    |             |               |
| GI_4809281-S | 314.1  | 517.3  | 597    | BMP6     | <a href="#">NM_001718.2</a> | VGR;VGR1                             | cytokine     |             | skeletal      |
| GI_4809282-S | 89.9   | 105.3  | 81.9   | HAL      | <a href="#">NM_002108.2</a> | HIS;HSTD                             | histidine    | cytosol     | histidine     |
| GI_4809285-A | 111.3  | 112.6  | 85.6   | IRF7     | <a href="#">NM_004030.1</a> | IRF7A                                | specific     | cytoplasm   | response      |
| GI_4809289-S | 348.3  | 684.9  | 563.1  | GALGT    | <a href="#">NM_001478.2</a> | GALNACT                              | (N-          | Golgi       | glycosphin    |
| GI_4826642-S | 741.4  | 634.3  | 394.5  | ANXA3    | <a href="#">NM_005139.1</a> | ANX3                                 | calcium-     | cytoplasm   |               |
| GI_4826650-S | 102.4  | 106.9  | 102    | C21orf2  | <a href="#">NM_004928.1</a> | A2;YF5                               | molecular    | cellular_co | biological_   |
| GI_4826652-S | 318.3  | 250.1  | 219.6  | C21orf5  | <a href="#">NM_005128.1</a> | pad-1;KIAA0933                       | molecular    | cellular_co | developm      |
| GI_4826658-S | 1435.4 | 2131.5 | 1538.2 | CAPZB    | <a href="#">NM_004930.1</a> | CAPB;CAPZ;CAPPB                      | actin        | F-actin     |               |
| GI_4826664-S | 368.7  | 464.5  | 389.1  | CCS      | <a href="#">NM_005125.1</a> |                                      | intracellula | obsolete    | intracellula  |
| GI_4826681-S | 915    | 984    | 1061.4 | CTNS     | <a href="#">NM_004937.1</a> | CTNS-LSB                             | L-cystine    | lysosomal   | L-cystine     |
| GI_4826683-S | 136.7  | 361    | 138.4  | DAPK1    | <a href="#">NM_004938.1</a> | DAPK                                 | calmoduli    |             | induction     |
| GI_4826685-S | 4091   | 4279.2 | 3918.4 | DDX1     | <a href="#">NM_004939.1</a> | DBP-RB                               | RNA          | cellular_co | ribosome      |
| GI_4826689-S | 481.4  | 579.1  | 555.2  | DHX8     | <a href="#">NM_004941.1</a> | DDX8;HRH1;PRP22                      | ATP          | spliceoso   | RNA           |

|              |        |        |        |           |                             |                                   |                          |                     |
|--------------|--------|--------|--------|-----------|-----------------------------|-----------------------------------|--------------------------|---------------------|
| GI_4826693-S | 389.3  | 452.2  | 566.8  | DGCR2     | <a href="#">NM_005137.1</a> | IDD;LAN;DGS-C;SEZ-12;KIAA0163     | lectin [goid integral to | histogene           |
| GI_4826697-S | 113.2  | 146.1  | 124.1  | DNASE1L3  | <a href="#">NM_004944.1</a> | LSD;DNAS1L3                       | deoxyribo nucleus        | DNA                 |
| GI_4826699-S | 398.5  | 515.4  | 573.1  | DNM2      | <a href="#">NM_004945.1</a> | DYNII                             | microtubul               | G2/M                |
| GI_4826713-S | 168.9  | 173.9  | 173.9  | ENDOGL1   | <a href="#">NM_005107.1</a> | ENGL;ENGL-B;ENGL-a;ENDOGL2        |                          |                     |
| GI_4826715-S | 263.7  | 311.4  | 218.5  | SLC29A1   | <a href="#">NM_004955.1</a> | ENT1                              | nucleoside membran       | nucleoside          |
| GI_4826733-S | 3641.8 | 3206.9 | 2757.7 | FUS       | <a href="#">NM_004960.1</a> | TLS;FUS1                          | RNA nucleus              | cell growth         |
| GI_4826735-S | 4936.3 | 4953.2 | 3787.8 | FXR1      | <a href="#">NM_005087.1</a> |                                   | RNA polysome             | nucleocyto          |
| GI_4826741-S | 4150.1 | 5508.5 | 7302.4 | GFPT2     | <a href="#">NM_005110.1</a> | GFAT2                             | glutamine- cytoplasm     | energy              |
| GI_4826745-S | 116.3  | 120.1  | 117.4  | GNG7      | <a href="#">NM_005145.1</a> |                                   | heterotrim peripheral    | regulation          |
| GI_4826751-S | 110    | 129.3  | 117.4  | GUCY2C    | <a href="#">NM_004963.1</a> | STAR;GUC2C                        | guanylate brush          | receptor            |
| GI_4826761-S | 117    | 126.3  | 114.1  | HP        | <a href="#">NM_005143.1</a> |                                   | plasma                   | defense             |
| GI_4826763-S | 148.1  | 180.6  | 184.4  | HS3ST1    | <a href="#">NM_005114.1</a> | 3OST;3OST1                        | sulfotransf Golgi        | proteolysis         |
| GI_4826767-A | 236.6  | 311    | 450    | ICA1      | <a href="#">NM_004968.1</a> | ICA69;ICAp69                      |                          | cytoplasm           |
| GI_4826769-S | 357.6  | 468.9  | 447    | IDE       | <a href="#">NM_004969.1</a> |                                   | insulysin soluble        | sex                 |
| GI_4826771-S | 99.7   | 100.2  | 96.3   | IGFALS    | <a href="#">NM_004970.1</a> | ALS                               |                          |                     |
| GI_4826773-S | 705.6  | 1219.5 | 1218.7 | G1P2      | <a href="#">NM_005101.1</a> | UCRP;IFI15;ISG15                  | protein extracellul      | immune              |
| GI_4826779-S | 200.9  | 230.2  | 227.9  | SLC12A6   | <a href="#">NM_005135.1</a> | KCC3;ACCPN;KCC3A;KCC3B;DKFZP434D2 | potassium integral to    | small               |
| GI_4826797-A | 170.6  | 186.9  | 146.1  | KCNJ4     | <a href="#">NM_004981.1</a> | HIR;HRK1;HIRK2;Kir2.3             | inward voltage-          | potassium           |
| GI_4826797-I | 97.2   | 85.8   | 86.7   | KCNJ4     | <a href="#">NM_004981.1</a> | HIR;HRK1;HIRK2;Kir2.3             | inward voltage-          | potassium           |
| GI_4826813-A | 1471.4 | 1614.3 | 1307.1 | KTN1      | <a href="#">NM_004986.1</a> | CG1;KNT;KIAA0004                  |                          | endoplas nonselecti |
| GI_4826815-S | 96.9   | 86.8   | 86.5   | LGI1      | <a href="#">NM_005097.1</a> | EPT;IB1099                        | tumor                    | neurogene           |
| GI_4826827-S | 117.6  | 111.2  | 104.5  | MDS1      | <a href="#">NM_004991.1</a> | PRDM3;MDS1-EVI1                   | transcripti              |                     |
| GI_4826835-S | 5049.2 | 352.9  | 158.6  | MMP9      | <a href="#">NM_004994.1</a> | GELB;CLG4B                        | collagenas extracellul   | proteolysis         |
| GI_4826841-S | 111    | 128.5  | 103.3  | MYBPH     | <a href="#">NM_004997.1</a> |                                   | structural cytoskelet    | regulation          |
| GI_4826843-S | 165.3  | 193.5  | 173.4  | MYO1E     | <a href="#">NM_004998.1</a> | MYO1C                             | myosin myosin            |                     |
| GI_4826845-S | 488.6  | 631.6  | 588    | MYO6      | <a href="#">NM_004999.1</a> |                                   |                          |                     |
| GI_4826849-S | 522    | 704    | 656.2  | NDUFA7    | <a href="#">NM_005001.1</a> | B14.5a                            | NADH NADH                |                     |
| GI_4826853-S | 2046.1 | 2268.8 | 1751.3 | NDUFB8    | <a href="#">NM_005004.1</a> | ASHI                              | NADH NADH                | mitochond           |
| GI_4826859-S | 1832.6 | 1841.1 | 1432.1 | NHP2L1    | <a href="#">NM_005008.1</a> | NHPX;OTK27                        | RNA nucleolus            | regulation          |
| GI_4826867-S | 472.9  | 1303.6 | 890.4  | ROR1      | <a href="#">NM_005012.1</a> | NTRKR1;dJ537F10.1                 | transmem cytoplasm       | transmem            |
| GI_4826869-S | 477.7  | 545    | 460.8  | NUCB2     | <a href="#">NM_005013.1</a> | NEFA                              | calcium cytosol          |                     |
| GI_4826875-S | 167.6  | 210.6  | 172.1  | OMD       | <a href="#">NM_005014.1</a> | SLRR2C                            | cell extracellul         | cell                |
| GI_4826879-S | 2415.8 | 2189.8 | 1856.4 | OXA1L     | <a href="#">NM_005015.1</a> |                                   |                          | mitochond aerobic   |
| GI_4826881-S | 1001.6 | 730.1  | 679.1  | THOC1     | <a href="#">NM_005131.1</a> | P84;HPR1                          | structural nucleus       | RNA                 |
| GI_4826889-S | 263.3  | 335.7  | 289.1  | PDCD1     | <a href="#">NM_005018.1</a> | PD1;SLEB2;hPD-I                   | signal integral to       | humoral             |
| GI_4826893-S | 97.5   | 93.6   | 91.1   | PDE1C     | <a href="#">NM_005020.1</a> | Hcam3                             | calmoduli                | signal              |
| GI_4826901-S | 101.1  | 109.2  | 111.4  | SERPINB10 | <a href="#">NM_005024.1</a> | PI10;bomapin                      | protein                  |                     |
| GI_4826903-S | 907.4  | 236.6  | 137.3  | SERPINI1  | <a href="#">NM_005025.1</a> | PI12;neuroserpin                  | serpin                   | peripheral          |
| GI_4826907-S | 250.4  | 290    | 289.9  | PIK3R2    | <a href="#">NM_005027.1</a> | P85B;p85-BETA                     | 1- phosphoin             | intracellula        |
| GI_4826913-S | 440.2  | 552.5  | 506.4  | PLA2G4B   | <a href="#">NM_005090.1</a> | HsT16992;cPLA2-beta               | calcium-                 | phospholi           |
| GI_4826921-S | 1031.3 | 989.7  | 1028.4 | PMSCL1    | <a href="#">NM_005033.1</a> |                                   | exonuclea nucleolus      | rRNA                |
| GI_4826933-S | 1207.2 | 1363   | 1152.5 | PPP4R1    | <a href="#">NM_005134.1</a> | PP4R1                             |                          |                     |
| GI_4826943-S | 98.9   | 104.6  | 96.5   | PRH2      | <a href="#">NM_005042.1</a> | Pr                                |                          | extracellul         |
| GI_4826947-S | 285.3  | 299.4  | 275.1  | PRKX      | <a href="#">NM_005044.1</a> | PKX1                              | cAMP-                    | protein             |

|              |        |        |        |         |                             |                                   |                    |                         |
|--------------|--------|--------|--------|---------|-----------------------------|-----------------------------------|--------------------|-------------------------|
| GI_4826955-S | 995.3  | 791.9  | 657.3  | PWP2H   | <a href="#">NM_005049.1</a> | PWP2;EHOC-17                      | signal             | signal                  |
| GI_4826959-S | 7795.9 | 7441.3 | 6736.6 | QARS    | <a href="#">NM_005051.1</a> | GLNRS                             | glutamine- soluble | glutaminyl-             |
| GI_4826967-S | 1172.1 | 1531.9 | 1480.8 | JARID1A | <a href="#">NM_005056.1</a> | RBP2;RBBP2                        | protein            | nucleus transcripti     |
| GI_4826969-S | 170.1  | 191.5  | 197.3  | RBBP5   | <a href="#">NM_005057.1</a> | RBQ3                              |                    | nucleus                 |
| GI_4826973-S | 163.7  | 179.5  | 193.4  | RBM1A1  | <a href="#">NM_005058.1</a> | RBM1;RBM2;RBM3;YRRM1;YRRM2        | RNA                | nucleus RNA             |
| GI_4826975-S | 570.8  | 621.1  | 662.7  | RCE1    | <a href="#">NM_005133.1</a> | FACE2;RCE1A;RCE1B;hRCE1;FACE-2    | prenyl-            | endoplas proteolysis    |
| GI_4826979-S | 168.4  | 211.7  | 173    | NR1H4   | <a href="#">NM_005123.1</a> | BAR;FXR;HRR1;HRR-1;RIP14          | transcripti        | nucleus bile acid       |
| GI_4826991-S | 1133.2 | 1094.6 | 1188.2 | SCO2    | <a href="#">NM_005138.1</a> | SCO1L                             | copper ion         | mitochond electron      |
| GI_4826997-S | 720.8  | 597.1  | 464.9  | SFPQ    | <a href="#">NM_005066.1</a> | PSF;POMP100                       | pre-mRNA           | nucleus mRNA            |
| GI_4827007-S | 108.3  | 97.2   | 106    | SLC15A1 | <a href="#">NM_005073.1</a> | PEPT1;HPECT1;HPEPT1               | peptide:hy         | membran small           |
| GI_4827009-S | 86.1   | 85.1   | 74.8   | SLC17A1 | <a href="#">NM_005074.1</a> | NPT1;NAPI-1                       | sodium-            | membran phosphate       |
| GI_4827011-S | 91.3   | 98.6   | 99.2   | SLC1A6  | <a href="#">NM_005071.1</a> | EAAT4                             | glutamate/         | membran L-              |
| GI_4827015-A | 154.1  | 202.9  | 216.5  | SLC4A3  | <a href="#">NM_005070.1</a> | AE3;SLC2C                         | inorganic          | membran small           |
| GI_4827023-S | 196.7  | 239.3  | 241.4  | TBX19   | <a href="#">NM_005149.1</a> | TPIT;TBS19;dJ747L4.1              | RNA                | nucleus embryoge        |
| GI_4827029-S | 250.5  | 312.2  | 329.6  | TLE3    | <a href="#">NM_005078.1</a> | ESG;ESG3;HsT18976;KIAA1547        |                    | nucleus histogene       |
| GI_4827035-S | 218.6  | 282.9  | 220.2  | PGLYRP1 | <a href="#">NM_005091.1</a> | PGRP;TAG7;PGRPS;PGLYRP;PGRP-      | bacterial          | extracellul immune      |
| GI_4827037-S | 113.6  | 118.5  | 117    | TPD52   | <a href="#">NM_005079.1</a> | D52;N8L;hD52                      |                    | kinesin embryoge        |
| GI_4827039-S | 142.5  | 143.4  | 122.6  | THRAP3  | <a href="#">NM_005119.1</a> | TRAP150                           | transcripti        | nucleus regulation      |
| GI_4827041-S | 167.1  | 183.1  | 140    | TNRC11  | <a href="#">NM_005120.1</a> | HOPA;OPA1;CAGH45;TRAP230;KIAA0192 | transcripti        | nucleus regulation      |
| GI_4827043-S | 167.6  | 221.2  | 179.5  | THRAP1  | <a href="#">NM_005121.1</a> | TRAP240;KIAA0593                  | transcripti        | nucleus regulation      |
| GI_4827045-S | 109    | 113.6  | 109.8  | U2AF1L2 | <a href="#">NM_005089.1</a> | U2AF1RS2;U2AF1-RS2                | pre-mRNA           | ribonucleo mRNA         |
| GI_4827062-S | 460.7  | 371.2  | 537.1  | ZNF142  | <a href="#">NM_005081.1</a> |                                   |                    |                         |
| GI_4827070-S | 4314.3 | 3755.4 | 3218.9 | ZNF9    | <a href="#">NM_003418.1</a> | DM2;CNBP;CNBP1;PROMM              | transcripti        | cholester               |
| GI_4885060-S | 371.7  | 469.3  | 490    | AKT1    | <a href="#">NM_005163.1</a> | PKB;RAC;PRKBA;RAC-ALPHA           | receptor           | nucleus response        |
| GI_4885062-S | 5143.1 | 4725.9 | 2287.7 | ALDOC   | <a href="#">NM_005165.1</a> | ALDC                              | fructose-          | fructose                |
| GI_4885070-S | 219.5  | 258.1  | 236.7  | PHOX2A  | <a href="#">NM_005169.1</a> | ARIX;FEOM2;NCAM2;PMX2A;CFEOM2     | transcripti        | nucleus neurotran       |
| GI_4885074-S | 100.6  | 119.9  | 105.8  | ATOH1   | <a href="#">NM_005172.1</a> | ATH1;HATH1;MATH-1                 | transcripti        | nucleus central         |
| GI_4885078-S | 6217.6 | 6628.9 | 5840.7 | ATP5C1  | <a href="#">NM_005174.1</a> | ATP5C;ATP5CL1                     | hydrogen-          | proton- energy          |
| GI_4885080-S | 2361.2 | 3442.8 | 2896   | ATP5G1  | <a href="#">NM_005175.1</a> | ATP5G                             | hydrogen-          | proton- proton          |
| GI_4885096-S | 144.8  | 168.8  | 150.5  | BMP15   | <a href="#">NM_005448.1</a> | GDF9B                             | cytokine           | extracellul female      |
| GI_4885100-S | 159.8  | 181.4  | 166.2  | CA7     | <a href="#">NM_005182.1</a> |                                   | carbonate          | one-                    |
| GI_4885102-S | 88.7   | 115.6  | 98.1   | CACNA1F | <a href="#">NM_005183.1</a> | CSNB2;CSNBX2                      | voltage-           | voltage- vision         |
| GI_4885104-S | 418.9  | 437.2  | 466.2  | CHAF1B  | <a href="#">NM_005441.1</a> | CAF1;MPP7;CAF-                    | histone-           | chromatin DNA           |
| GI_4885106-S | 211.1  | 237.3  | 230.8  | CHAF1A  | <a href="#">NM_005483.1</a> | CAF1;CAF-1;CAF1B;CAF1P150         | histone-           | chromatin DNA           |
| GI_4885108-S | 337.9  | 396.2  | 348.3  | CALM3   | <a href="#">NM_005184.1</a> | PHKD;PHKD3                        | calcium            |                         |
| GI_4885116-S | 98.2   | 92.9   | 97.7   | CBL     | <a href="#">NM_005188.1</a> | CBL2;C-CBL;RNF55                  | transcripti        | nucleus oncogene        |
| GI_4885126-S | 129.2  | 122.5  | 118.9  | CDX4    | <a href="#">NM_005193.1</a> |                                   | transcripti        | nucleus regulation      |
| GI_4885134-S | 140.9  | 143.8  | 144.5  | CER1    | <a href="#">NM_005454.1</a> |                                   | molecular          | cellular_co biological_ |
| GI_4885136-S | 301.8  | 293.8  | 204    | CHES1   | <a href="#">NM_005197.1</a> | FOXN3                             | cell cycle         | nucleus DNA             |
| GI_4885160-S | 117.3  | 123.1  | 129.4  | CSN3    | <a href="#">NM_005212.1</a> | CSN10                             | molecular          | extracellul physiologi  |
| GI_4885168-S | 190.7  | 191.8  | 172.4  | GJA7    | <a href="#">NM_005497.1</a> | CX45                              | connexon           | gap intercellula        |
| GI_4885170-S | 194.3  | 246.9  | 280.2  | CXorf6  | <a href="#">NM_005491.1</a> | CG1;F18                           | molecular          | cellular_co biological_ |
| GI_4885172-S | 381.7  | 320.7  | 298.5  | CCDC6   | <a href="#">NM_005436.1</a> | H4;PTC;TPC;TST1;D10S170           | structural         | cell growth             |
| GI_4885174-S | 123    | 98.2   | 120.8  | DCC     | <a href="#">NM_005215.1</a> | CRC18;CRCR1                       | transmem           | peripheral axonogen     |

|              |        |        |        |        |                             |                               |             |             |             |
|--------------|--------|--------|--------|--------|-----------------------------|-------------------------------|-------------|-------------|-------------|
| GI_4885192-S | 325.5  | 355    | 506.5  | ARID3A | <a href="#">NM_005224.1</a> | DRIL1;BRIGHT;E2FBP1           | transcripti | nucleus     | regulation  |
| GI_4885214-S | 114.2  | 120    | 115.2  | ERBB4  | <a href="#">NM_005235.1</a> | HER4                          | transmem    | integral to | oncogene    |
| GI_4885216-S | 179.8  | 190    | 177.7  | ERCC4  | <a href="#">NM_005236.1</a> | XPF;RAD1                      | endodeox    | nucleus     | nucleotide- |
| GI_4885224-I | 3822.1 | 3702.9 | 2864.1 | EWSR1  | <a href="#">NM_005243.1</a> | EWS                           | RNA         |             | oncogene    |
| GI_4885228-S | 1070.9 | 1563.4 | 1297.2 | FAT    | <a href="#">NM_005245.1</a> | ME5;CDHF7                     | tumor       | integral to | embryoge    |
| GI_4885230-S | 279.1  | 253.3  | 238.5  | FER    | <a href="#">NM_005246.1</a> | TYK3                          | protein-    | nucleus     | protein     |
| GI_4885234-S | 114.8  | 110.2  | 121.2  | FGR    | <a href="#">NM_005248.1</a> | SRC2;c-fgr;p55c-fgr           | protein-    |             | response    |
| GI_4885236-S | 226.1  | 324.2  | 265.1  | FOXC2  | <a href="#">NM_005251.1</a> | MFH1;MFH-1;FKHL14             | transcripti | nucleus     | mesoderm    |
| GI_4885250-S | 2813.2 | 2844.9 | 2617.4 | GAK    | <a href="#">NM_005255.1</a> |                               | protein     | endoplas    | regulation  |
| GI_4885258-S | 206.1  | 240.1  | 219.9  | GDF8   | <a href="#">NM_005259.1</a> | MSTN                          | growth      |             | TGFbeta     |
| GI_4885264-S | 121.4  | 150    | 113    | GFER   | <a href="#">NM_005262.1</a> | ALR;HSS;ERV1;HPO1;HPO2;HERV1  | molecular   | cellular_co | spermatog   |
| GI_4885266-S | 227.6  | 207.1  | 244.2  | GFI1   | <a href="#">NM_005263.1</a> | ZNF163                        | RNA         | nucleus     | G1/S-       |
| GI_4885270-A | 203.6  | 232.2  | 157.2  | GGT1   | <a href="#">NM_005265.1</a> | GGT;GTG;CD224;D22S672;D22S732 | gamma-      | membran     | amino       |
| GI_4885278-S | 107.8  | 125.6  | 119.7  | GLI    | <a href="#">NM_005269.1</a> | GLI1                          | RNA         | nucleus     | oncogene    |
| GI_4885280-S | 2062.8 | 1745   | 2295.9 | GLUD1  | <a href="#">NM_005271.1</a> | GDH;GLUD                      | glutamate   | mitochond   | glutamate   |
| GI_4885286-S | 509.9  | 495.8  | 456    | GNG5   | <a href="#">NM_005274.1</a> |                               | heterotrim  | heterotrim  | G-protein   |
| GI_4885294-S | 108.8  | 134.6  | 133.5  | GPR12  | <a href="#">NM_005288.1</a> | GPCR21                        | G-protein   | integral to | G-protein   |
| GI_4885298-S | 117.4  | 123.3  | 123    | GPR15  | <a href="#">NM_005290.1</a> |                               | G-protein   | integral to | G-protein   |
| GI_4885300-S | 109    | 118.8  | 102.9  | GPR17  | <a href="#">NM_005291.1</a> |                               | chemokin    | integral to | G-protein   |
| GI_4885304-S | 158.1  | 195.1  | 159.4  | GPR20  | <a href="#">NM_005293.1</a> |                               | G-protein   | integral to | G-protein   |
| GI_4885306-S | 112.7  | 137.5  | 117.5  | GPR21  | <a href="#">NM_005294.1</a> |                               | G-protein   | integral to | G-protein   |
| GI_4885308-S | 108    | 114    | 113    | GPR22  | <a href="#">NM_005295.1</a> |                               | G-protein   | integral to | G-protein   |
| GI_4885310-S | 127.9  | 133.5  | 131    | GPR23  | <a href="#">NM_005296.1</a> | P2Y9;P2Y5-LIKE                | G-protein   | integral to | G-protein   |
| GI_4885316-S | 102.3  | 100.9  | 99.3   | GPR31  | <a href="#">NM_005299.1</a> |                               | G-protein   | integral to | G-protein   |
| GI_4885326-S | 109.7  | 122    | 109.1  | GPR40  | <a href="#">NM_005303.1</a> |                               | G-protein   | integral to | G-protein   |
| GI_4885330-S | 100    | 120.7  | 104.3  | GPR42  | <a href="#">NM_005305.1</a> |                               | G-protein   | integral to | G-protein   |
| GI_4885332-S | 122.4  | 131.3  | 119.4  | GPR43  | <a href="#">NM_005306.1</a> | FFA2R                         | G-protein   | integral to | G-protein   |
| GI_4885334-S | 99.5   | 108.4  | 108.8  | GPR4   | <a href="#">NM_005282.1</a> |                               | G-protein   | integral to | G-protein   |
| GI_4885338-S | 498.5  | 568.7  | 482.2  | XCR1   | <a href="#">NM_005283.1</a> | GPR5;CCXCR1                   | chemokin    | integral to | cytosolic   |
| GI_4885342-S | 227.7  | 281.3  | 247.8  | GPR7   | <a href="#">NM_005285.1</a> |                               | opioid      | integral to | G-protein   |
| GI_4885346-A | 175.7  | 221.4  | 207.9  | GRK4   | <a href="#">NM_005307.1</a> | GPRK4;GPRK2L                  | G-protein-  |             | regulation  |
| GI_4885348-S | 504.9  | 513.3  | 671.4  | GRK5   | <a href="#">NM_005308.1</a> | GPRK5                         | G-protein-  | soluble     | regulation  |
| GI_4885350-S | 84.5   | 85.3   | 86     | GPT    | <a href="#">NM_005309.1</a> | AAT1;ALT1;GPT1                | transamin   | soluble     | amino       |
| GI_4885354-S | 156.8  | 165.4  | 153.7  | GRB7   | <a href="#">NM_005310.1</a> |                               | SH3/SH2     |             | EGF         |
| GI_4885360-S | 160.6  | 196.3  | 180.2  | GRPR   | <a href="#">NM_005314.1</a> |                               | peptide     | integral to | G-protein   |
| GI_4885362-S | 78.6   | 81.2   | 85.2   | GSCL   | <a href="#">NM_005315.1</a> |                               | DNA         | nucleus     | embryoge    |
| GI_4885386-S | 684.1  | 707    | 577    | HADHSC | <a href="#">NM_005327.1</a> | SCHAD                         | 3-          | mitochond   |             |
| GI_4885390-S | 959.5  | 1077.3 | 151.9  | HAS2   | <a href="#">NM_005328.1</a> |                               | transferas  | integral to |             |
| GI_4885400-S | 1300.5 | 1387.6 | 1361.4 | HCCS   | <a href="#">NM_005333.1</a> | CCHL                          | holocytoch  | mitochond   | electron    |
| GI_4885402-S | 507    | 622.8  | 573.5  | HCFC1  | <a href="#">NM_005334.1</a> | HCF1;HFC1;HCF-1               | transcripti | nucleus     | transcripti |
| GI_4885406-S | 91.5   | 95.4   | 93.4   | HCN4   | <a href="#">NM_005477.1</a> |                               | cation      | integral to | cation      |
| GI_4885418-S | 821.7  | 673.7  | 573    | HKR3   | <a href="#">NM_005341.1</a> |                               | transcripti | nucleus     | regulation  |
| GI_4885420-S | 688.4  | 2314.4 | 1135.2 | HMGB3  | <a href="#">NM_005342.1</a> | HMG4;HMG2A                    | DNA         | chromatin   | developm    |
| GI_4885424-A | 314    | 361    | 470.7  | HRAS   | <a href="#">NM_005343.1</a> | HRAS1;RASH1                   | GTPase      | peripheral  | chemotaxi   |

|              |         |        |        |          |                             |                                 |             |              |              |
|--------------|---------|--------|--------|----------|-----------------------------|---------------------------------|-------------|--------------|--------------|
| GI_4885440-S | 239.6   | 264.6  | 238.2  | SLC17A4  | <a href="#">NM_005495.1</a> | KAIA2138                        | sodium:ph   | membran      | sodium       |
| GI_4885454-S | 2185.9  | 2365.5 | 2172.6 | LNK      | <a href="#">NM_005475.1</a> |                                 |             |              | intracellula |
| GI_4885476-S | 95.2    | 123.2  | 101.9  | MB       | <a href="#">NM_005368.1</a> | PVALB;MGC13548                  | electron    |              | oxygen       |
| GI_4885486-S | 759.6   | 1165.2 | 1118.5 | MLF2     | <a href="#">NM_005439.1</a> |                                 | molecular   | nucleus      | biological_  |
| GI_4885488-S | 137.4   | 143.8  | 131.4  | MOS      | <a href="#">NM_005372.1</a> | MSV                             | protein     |              | protein      |
| GI_4885490-S | 303.9   | 393.4  | 336.2  | MPL      | <a href="#">NM_005373.1</a> | MPLV;TPOR;C-MPL;CD110           | transmem    | integral to  | cell         |
| GI_4885496-S | 122.6   | 121.4  | 107.5  | MYB      | <a href="#">NM_005375.1</a> |                                 |             |              |              |
| GI_4885506-S | 129.7   | 130.5  | 119.1  | NAALADL1 | <a href="#">NM_005468.1</a> | I100;NAALADASEL                 | aminopept   | integral to  | proteolysis  |
| GI_4885510-S | 1172.6  | 1119.2 | 1073.1 | NCL      | <a href="#">NM_005381.1</a> | C23                             | RNA         | nucleolus    |              |
| GI_4885512-S | 204.4   | 282.9  | 251.5  | NEF3     | <a href="#">NM_005382.1</a> | NFM;NEFM;NF-M                   | structural  | neurofilam   |              |
| GI_4885514-S | 138.8   | 153.4  | 122.7  | NEU2     | <a href="#">NM_005383.1</a> | SIAL2                           | catalytic   | cytoplasm    | carbohydr    |
| GI_4885516-S | 1559.7  | 1888.1 | 1334.7 | NFIL3    | <a href="#">NM_005384.1</a> | E4BP4;IL3BP1;NFIL3A;NF-IL3A     | transcripti | nucleus      | transcripti  |
| GI_4885524-S | 117.2   | 130.8  | 115.9  | SH2D3A   | <a href="#">NM_005490.1</a> | NSP1                            | SH3/SH2     |              | JNK          |
| GI_4885526-A | 104.8   | 105.7  | 103.6  | SH2D3C   | <a href="#">NM_005489.1</a> | CHAT;NSP3                       | SH3/SH2     |              | JNK          |
| GI_4885538-S | 2260.1  | 2355.9 | 2503.6 | PCMT1    | <a href="#">NM_005389.1</a> |                                 | protein-L-  | endoplas     | protein      |
| GI_4885544-S | 221     | 332.7  | 301.7  | PDK3     | <a href="#">NM_005391.1</a> |                                 | [pyruvate   | mitochond    | glucose      |
| GI_4885552-S | 313.3   | 261.7  | 255.5  | PMS2L9   | <a href="#">NM_005395.1</a> | PMSR3                           | nucleic     | intracellula | regulation   |
| GI_4885562-S | 119.8   | 125.1  | 104.4  | PRKCE    | <a href="#">NM_005400.1</a> | PKCE                            | protein     | peripheral   | induction    |
| GI_4885578-S | 176.1   | 196.3  | 182.7  | RQCD1    | <a href="#">NM_005444.1</a> | RCD1;CNOT9;RCD1+                |             |              | sex          |
| GI_4885582-S | 151.5   | 144.6  | 150    | ROCK1    | <a href="#">NM_005406.1</a> | P160ROCK                        | protein     | intracellula | actin        |
| GI_4885584-S | 6030.4  | 5346.9 | 6269.2 | SAE1     | <a href="#">NM_005500.1</a> | AOS1;SUA1;HSPC140               | ubiquitin-  |              | small        |
| GI_4885590-S | 90.1    | 100.1  | 92     | SEPP1    | <a href="#">NM_005410.1</a> | SeP                             | selenium    |              | response     |
| GI_4885596-S | 150.7   | 193    | 167.9  | SIX3     | <a href="#">NM_005413.1</a> | HPE2                            | transcripti | nucleus      | brain        |
| GI_4885602-S | 161.8   | 138.9  | 127.3  | SNCAIP   | <a href="#">NM_005460.1</a> | SYPH1                           | protein     | kinesin      | pathogene    |
| GI_4885606-S | 126.5   | 157.2  | 137.5  | SPRR3    | <a href="#">NM_005416.1</a> |                                 | structural  |              |              |
| GI_4885610-S | 92.2    | 91.8   | 86.3   | ABI1     | <a href="#">NM_005470.1</a> | E3B1;NAP1;ABI-1                 | cytoskelet  | cytosol      | transmem     |
| GI_4885618-S | 110     | 116.4  | 102.4  | TAL2     | <a href="#">NM_005421.1</a> |                                 | protein     |              | oncogene     |
| GI_4885626-S | 102.6   | 96.9   | 106.9  | TECTA    | <a href="#">NM_005422.1</a> | DFNA8;DFNA12;DFNB21             | extracellul | extracellul  | hearing      |
| GI_4885636-S | 1106.4  | 1155   | 1538.7 | TOM1     | <a href="#">NM_005488.1</a> |                                 |             | endosome     | nonselecti   |
| GI_4885638-S | 337.4   | 394.9  | 306.6  | TOM1L1   | <a href="#">NM_005486.1</a> | SRCASM                          | protein     | endosome     | nonselecti   |
| GI_4885642-S | 665.8   | 734.5  | 711.7  | TP53BP2  | <a href="#">NM_005426.1</a> | 53BP2;ASPP2;PPP1R13A            | SH3/SH2     | cytoplasm    | regulation   |
| GI_4885644-S | 477.2   | 608.4  | 556.1  | TP73     | <a href="#">NM_005427.1</a> | P73                             | transcripti | nucleus      | DNA          |
| GI_4885648-S | 1037.6  | 941.5  | 901.8  | UBA2     | <a href="#">NM_005499.1</a> | SAE2                            | ubiquitin-  |              | small        |
| GI_4885656-S | 243.2   | 270.1  | 245.6  | XRCC2    | <a href="#">NM_005431.1</a> |                                 | DNA         | nucleus      | meiosis      |
| GI_4895106-S | 263.8   | 296.2  | 272.4  | AVPR2    | <a href="#">NM_000054.2</a> | DI1;DIR;NDI;V2R;ADHR            | vasopress   | endosome     | hemostasi    |
| GI_4996892-S | 206     | 220.7  | 208.3  | HSPB1    | <a href="#">NM_001540.2</a> | HSP27;HSP28;Hsp25;HS.76067      | heat        | cytoplasm    | regulation   |
| GI_5016087-S | 117     | 114.4  | 112.6  | ACTA1    | <a href="#">NM_001100.2</a> | ACTA;ASMA;NEM1;NEM2             | structural  | actin        | muscle       |
| GI_5016088-S | 38652.8 | 45115  | 41703  | ACTB     | <a href="#">NM_001101.2</a> |                                 | structural  | actin        | cell         |
| GI_5016089-S | 83.5    | 93.4   | 90.3   | NR0B1    | <a href="#">NM_000475.2</a> | AHC;AHX;GTD;HHG;AHCH;DAX1;NROB1 | ligand-     | nucleus      | sex          |
| GI_5016091-S | 2338.3  | 3116.2 | 2737.4 | AHR      | <a href="#">NM_001621.2</a> |                                 | ligand-     | nucleus      | cell cycle   |
| GI_5016092-S | 1253.9  | 1199.9 | 1210.3 | DLD      | <a href="#">NM_000108.2</a> | E3;LAD;DLDH;PHE3                | dihydrolip  | mitochond    | energy       |
| GI_5016093-S | 88.8    | 113.3  | 86     | FMOD     | <a href="#">NM_002023.2</a> | SLRR2E                          | protein     | extracellul  | TGFbeta      |
| GI_5031560-S | 222.1   | 265.8  | 213.1  | GPA33    | <a href="#">NM_005814.1</a> | A33                             | receptor    | proteoglyc   |              |
| GI_5031564-S | 112.6   | 112.6  | 105.2  | C4orf6   | <a href="#">NM_005750.1</a> | aC1                             |             |              | neurogene    |

|              |         |        |        |          |                             |                                    |              |             |               |
|--------------|---------|--------|--------|----------|-----------------------------|------------------------------------|--------------|-------------|---------------|
| GI_5031570-S | 705.2   | 1091.6 | 966.6  | ACTR2    | <a href="#">NM_005722.1</a> | ARP2                               | structural   | Arp2/3      | cell          |
| GI_5031586-S | 233.8   | 235.9  | 230.8  | APC2     | <a href="#">NM_005883.1</a> | APCL                               | beta-        | extracellul | signal        |
| GI_5031602-S | 382.4   | 266.3  | 261.4  | ARL4     | <a href="#">NM_005738.1</a> |                                    | small        | nucleus     | small         |
| GI_5031608-S | 613.6   | 811.8  | 667.2  | BCKDK    | <a href="#">NM_005881.1</a> |                                    |              | alpha-      |               |
| GI_5031614-S | 127.8   | 125.8  | 116.5  | ZNF255   | <a href="#">NM_005774.1</a> |                                    |              |             |               |
| GI_5031632-S | 348.9   | 419.7  | 281    | FARP1    | <a href="#">NM_005766.1</a> | CDEP;p63RhoGEF                     | Rho          | cytoskelet  |               |
| GI_5031634-S | 6477.4  | 10471  | 9569.9 | CFL1     | <a href="#">NM_005507.1</a> | CFL                                | actin        | cytoskelet  | Rho           |
| GI_5031636-S | 155.5   | 178.1  | 157.4  | CLECSF1  | <a href="#">NM_005752.1</a> |                                    | lectin [goid | extracellul | skeletal      |
| GI_5031638-S | 2450.7  | 2781.9 | 2373.7 | CNIH     | <a href="#">NM_005776.1</a> | CNII;TGAM77                        |              | integral to | signal        |
| GI_5031644-S | 1389.7  | 2600   | 2664.3 | COX17    | <a href="#">NM_005694.1</a> |                                    | intracellula | mitochond   | copper ion    |
| GI_5031650-S | 434.8   | 398.3  | 405.6  | D8S2298E | <a href="#">NM_005671.1</a> | REP8                               |              |             | fertilization |
| GI_5031652-S | 291.3   | 342.5  | 305.1  | BCAS2    | <a href="#">NM_005872.1</a> | DAM1                               | pre-mRNA     | spliceoso   | RNA           |
| GI_5031654-S | 86.7    | 90.7   | 92.2   | DSCR4    | <a href="#">NM_005867.1</a> | DCRB;DSCR4                         | molecular    | cellular_co | biological_   |
| GI_5031666-S | 803.6   | 897.4  | 728.3  | DNAL4    | <a href="#">NM_005740.1</a> | dJ327J16                           | microtubul   | dynein      | microtubul    |
| GI_5031672-S | 83.8    | 86.9   | 82.3   | IGSF6    | <a href="#">NM_005849.1</a> | DORA                               | transmem     | integral to | cell          |
| GI_5031694-S | 92      | 89.5   | 83.8   | HFL3     | <a href="#">NM_005666.1</a> | FHR2                               |              | extracellul |               |
| GI_5031696-S | 180.5   | 177.6  | 121.9  | ATP8B1   | <a href="#">NM_005603.1</a> | BRIC;FIC1;PFIC;ATPIC;PFIC1         | ATP          | integral to | bile acid     |
| GI_5031700-S | 277.9   | 396.1  | 592.6  | FSTL3    | <a href="#">NM_005860.1</a> | FLRG;FSRP                          |              | extracellul | oncogene      |
| GI_5031704-S | 300.9   | 236.3  | 278.5  | RGS19    | <a href="#">NM_005873.1</a> | GAIP;RGSGAIP                       | GTPase       | heterotrim  | small         |
| GI_5031706-S | 103.4   | 114.8  | 102.6  | GARP     | <a href="#">NM_005512.1</a> | D11S833E                           |              | integral to |               |
| GI_5031710-S | 5451    | 3687.8 | 3807.1 | GC20     | <a href="#">NM_005875.1</a> |                                    | translation  |             | regulation    |
| GI_5031714-S | 1863.9  | 1899.5 | 2022.7 | RGS19IP1 | <a href="#">NM_005716.1</a> | NIP;GIPC;IIP-1;TIP-                | protein      | soluble     | G-protein     |
| GI_5031716-I | 310.9   | 400.5  | 357.8  | COL4A3BP | <a href="#">NM_005713.1</a> | GPBP;CERTL;STARD11                 | protein      | kinesin     | protein       |
| GI_5031720-S | 113.9   | 124.2  | 107.3  | GPR52    | <a href="#">NM_005684.1</a> |                                    | G-protein    | integral to | G-protein     |
| GI_5031726-S | 377     | 399.1  | 436.3  | GTF2E1   | <a href="#">NM_005513.1</a> | FE;TFIIE-A                         |              |             |               |
| GI_5031728-S | 1011.3  | 1049.1 | 1056.2 | HAN11    | <a href="#">NM_005828.1</a> | AN11                               |              | cytoplasm   | signal        |
| GI_5031732-S | 136.8   | 149.2  | 138.9  | GPR64    | <a href="#">NM_005756.1</a> | HE6;TM7LN2                         | G-protein    | integral to | G-protein     |
| GI_5031734-S | 193     | 221.2  | 171.9  | CHST4    | <a href="#">NM_005769.1</a> | LSST                               | sulfotransf  |             | protein       |
| GI_5031738-S | 133.7   | 152.8  | 139.8  | HHLA1    | <a href="#">NM_005712.1</a> | PLA2L                              |              |             |               |
| GI_5031748-S | 5439.8  | 6051.9 | 5511   | HMG2     | <a href="#">NM_005517.1</a> | HMG17;MGC5629                      |              |             |               |
| GI_5031750-S | 192     | 229.2  | 203.8  | HMGCS2   | <a href="#">NM_005518.1</a> |                                    | hydroxym     | mitochond   | cholester     |
| GI_5031752-S | 1165.3  | 1130.6 | 1074   | HNRPH1   | <a href="#">NM_005520.1</a> | HNRPH;hnRNPH                       | poly(U)      | ribonucleo  | RNA           |
| GI_5031766-S | 392.7   | 304.5  | 345.5  | HSF1     | <a href="#">NM_005526.1</a> | HSTF1                              | transcripti  | nucleus     | heat          |
| GI_5031770-S | 345.7   | 387.1  | 366    | DNAJC4   | <a href="#">NM_005528.1</a> | HSPF2;MCG18;DANJC4                 | heat         | integral to | protein       |
| GI_5031774-S | 277.7   | 272.5  | 261.7  | CTDSPL   | <a href="#">NM_005808.1</a> | SCP3;HYA22;C3orf8                  | molecular    | nucleus     | biological_   |
| GI_5031778-S | 1947.1  | 1598.7 | 1274.8 | IFI16    | <a href="#">NM_005531.1</a> | IFNGIP1                            |              |             |               |
| GI_5031782-S | 2551.9  | 2915.5 | 2781.3 | IFNGR2   | <a href="#">NM_005534.1</a> | AF-1;IFGR2;IFNGT1                  | interferon-  | integral to | resistance    |
| GI_5031784-I | 198.8   | 231.5  | 203.8  | IL12RB1  | <a href="#">NM_005535.1</a> | IL12RB;MGC34454;IL-12R-BETA1       | interleukin  | integral to | positive      |
| GI_5031804-S | 952     | 662.6  | 506.8  | IRS1     | <a href="#">NM_005544.1</a> | HIRS-1                             | transmem     | cytoplasm   | signal        |
| GI_5031814-S | 1764    | 1915   | 1558.6 | KARS     | <a href="#">NM_005548.1</a> | KIAA0070                           | lysine-      | soluble     | protein       |
| GI_5031816-S | 1153.2  | 923.5  | 919.7  | KATNB1   | <a href="#">NM_005886.1</a> | KAT                                | microtubul   | centrosom   | microtubul    |
| GI_5031846-I | 1295.3  | 1492   | 1274.2 | LAMC2    | <a href="#">NM_005562.1</a> | EBR2;BM600;EBR2A;LAMB2T;LAMNB2;KAL | heparin      | laminin-5   | epidermal     |
| GI_5031856-S | 14526.2 | 19711  | 17877  | LDHA     | <a href="#">NM_005566.1</a> | LDH1                               | L-lactate    | cytosol     | glycolysis    |
| GI_5031858-S | 834.8   | 572.2  | 462    | DLEU1    | <a href="#">NM_005887.1</a> | BCMS;LEU1;XTP6                     | tumor        |             | cell growth   |

|              |         |        |        |          |                             |                                    |             |                         |
|--------------|---------|--------|--------|----------|-----------------------------|------------------------------------|-------------|-------------------------|
| GI_5031864-S | 379.2   | 415.9  | 393.1  | LHFP     | <a href="#">NM_005780.1</a> | DNA                                |             |                         |
| GI_5031880-S | 154.7   | 279.2  | 265    | LNPEP    | <a href="#">NM_005575.1</a> | CAP;IRAP;PLAP                      | metallope   | integral to pregnancy   |
| GI_5031882-S | 724.2   | 1081.2 | 568.7  | LOXL1    | <a href="#">NM_005576.1</a> | LOXL                               | electron    | extracellul protein     |
| GI_5031884-S | 93.3    | 108.2  | 110.8  | LPA      | <a href="#">NM_005577.1</a> | LP;AK38                            | apolipopro  | pathogene               |
| GI_5031886-S | 467.9   | 481.5  | 421.4  | LPP      | <a href="#">NM_005578.1</a> |                                    | molecular   | cellular_co biological_ |
| GI_5031892-S | 350.8   | 524.7  | 251.8  | NR1H3    | <a href="#">NM_005693.1</a> | LXRA;LXR-a;RLD-1                   | ligand-     | nucleus regulation      |
| GI_5031894-S | 152.3   | 193.9  | 153.5  | LY64     | <a href="#">NM_005582.1</a> | CD180;RP105                        | protein     | integral to immune      |
| GI_5031906-S | 196.5   | 197.6  | 190    | MEF2A    | <a href="#">NM_005587.1</a> | ADCAD1;RSRFC4;RSRFC9               | transcripti | nucleus muscle          |
| GI_5031908-S | 103.6   | 112.8  | 109.6  | MEP1A    | <a href="#">NM_005588.1</a> | PPHA                               | meprin A    | microvillus digestion   |
| GI_5031910-S | 94.7    | 99     | 93.3   | LILRB2   | <a href="#">NM_005874.1</a> | ILT4;LIR2;CD85D;LIR-2;MIR10;MIR-10 | defense/i   | membran cell            |
| GI_5031912-S | 103.2   | 126.5  | 112.2  | MLANA    | <a href="#">NM_005511.1</a> | MART1;MART-1                       | tumor       | integral to             |
| GI_5031918-S | 413.1   | 384.4  | 499.3  | MPHOSPH6 | <a href="#">NM_005792.1</a> | MPP;MPP6;MPP-6                     | cell cycle  | nucleus M phase         |
| GI_5031924-S | 111.8   | 124.8  | 109.9  | PRG4     | <a href="#">NM_005807.1</a> | MSF;SZP;CACP;JCAP                  | proteoglyc  | extracellul cell        |
| GI_5031926-S | 194.6   | 224.9  | 218    | MUSK     | <a href="#">NM_005592.1</a> |                                    | transmem    | microtubul transmem     |
| GI_5031928-S | 152.7   | 182.6  | 152.7  | MYF5     | <a href="#">NM_005593.1</a> |                                    | RNA         | nucleus myogenes        |
| GI_5031940-S | 924.3   | 571.6  | 293.4  | NFIB     | <a href="#">NM_005596.1</a> | NFIB2;NFIB3;NFI-RED                | transcripti | nucleus DNA             |
| GI_5031944-S | 119.8   | 109.2  | 124.4  | NHLH2    | <a href="#">NM_005599.1</a> | HEN2;NSCL2                         | DNA         | central                 |
| GI_5031946-S | 1968.5  | 1836   | 1751.3 | NIT1     | <a href="#">NM_005600.1</a> |                                    | nitrilase   | nitrogen                |
| GI_5031954-S | 109.3   | 120.9  | 117.7  | SLC17A2  | <a href="#">NM_005835.1</a> | NPT3                               | sodium:ph   | membran sodium          |
| GI_5031956-A | 966.1   | 826.1  | 855.7  | PQBP1    | <a href="#">NM_005710.1</a> | SHS;MRX55;NPW38                    | transcripti | nucleus regulation      |
| GI_5031958-S | 1068.8  | 887.2  | 704.3  | SDCCAG10 | <a href="#">NM_005869.1</a> | NY-CO-10                           | cyclophilin | protein                 |
| GI_5031962-S | 1349.4  | 1455   | 2120.5 | STUB1    | <a href="#">NM_005861.1</a> | CHIP;HSPABP2;NY-CO-7;SDCCAG7       |             | cytoplasm protein       |
| GI_5031970-S | 1801    | 4482.3 | 495.8  | LRRC17   | <a href="#">NM_005824.1</a> | P37NB                              |             | oncogene                |
| GI_5031976-I | 1630.2  | 1187.3 | 1284.4 | PBEF1    | <a href="#">NM_005746.1</a> | PBEF                               | cytokine    | positive                |
| GI_5031982-S | 85.5    | 90.7   | 80.2   | POU3F2   | <a href="#">NM_005604.1</a> | BRN2;OCT7;OTF7;POUF3               | transcripti | nucleus regulation      |
| GI_5031984-S | 1879.2  | 1817.3 | 1764.9 | NUTF2    | <a href="#">NM_005796.1</a> | NTF2;PP15                          | transporte  | nuclear nucleocyto      |
| GI_5032004-S | 190.5   | 237.9  | 202.5  | PTPRCAP  | <a href="#">NM_005608.1</a> | LPAP;CD45-AP                       | antimicrob  | integral to             |
| GI_5032008-S | 185     | 197.9  | 185.4  | PYGM     | <a href="#">NM_005609.1</a> |                                    | glycogen    | glycogen                |
| GI_5032012-S | 425.3   | 880.5  | 740    | KIF20A   | <a href="#">NM_005733.1</a> | RAB6KIFL                           | vesicle     | Golgi vesicle-          |
| GI_5032018-S | 107.1   | 137.4  | 375.2  | RAMP1    | <a href="#">NM_005855.1</a> |                                    | protein     | integral to regulation  |
| GI_5032020-S | 159     | 203.5  | 169    | RAMP2    | <a href="#">NM_005854.1</a> |                                    | receptor    | coated pit protein      |
| GI_5032022-S | 125.3   | 141.9  | 123.3  | RAMP3    | <a href="#">NM_005856.1</a> |                                    | receptor    | coated protein          |
| GI_5032026-S | 732.9   | 911.5  | 804.6  | RBBP4    | <a href="#">NM_005610.1</a> | RBAP48                             |             | nucleus negative        |
| GI_5032030-S | 1317.9  | 1686.4 | 1387.3 | RBM5     | <a href="#">NM_005778.1</a> | G15;RMB5;LUCA15                    | RNA         | nucleus RNA             |
| GI_5032032-S | 409.3   | 487.1  | 322.9  | RBM6     | <a href="#">NM_005777.1</a> | 3G2;g16;DEF3;DEF-3;NY-LU-12        | RNA         | nucleus RNA             |
| GI_5032046-S | 1273.3  | 1400.8 | 1571.1 | POP7     | <a href="#">NM_005837.1</a> | RPP2;RPP20                         | ribonuclea  | nucleolar tRNA          |
| GI_5032056-S | 3426.7  | 4349.3 | 3817.9 | S100A11  | <a href="#">NM_005620.1</a> | MLN70;S100C                        | calcium     | cytoplasm negative      |
| GI_5032058-S | 234.2   | 289.1  | 257.5  | S100A12  | <a href="#">NM_005621.1</a> | p6;CGRP;MRP6;CAAF1;ENRAGE          | calcium     | insoluble inflammat     |
| GI_5032062-S | 260.6   | 238.1  | 268.2  | STAG1    | <a href="#">NM_005862.1</a> | SA-1                               | DNA         | nucleus chromoso        |
| GI_5032082-S | 1895.3  | 1720.3 | 1925   | SDCBP    | <a href="#">NM_005625.1</a> | ST1;SYCL;MDA-9;TACIP18;SYNTENIN    | cytoskelet  | secretory protein-      |
| GI_5032092-S | 11097.7 | 6362.7 | 3469.6 | SLC1A5   | <a href="#">NM_005628.1</a> | R16;AAAT;ATBO;M7V1;RDRC;ASCT2;M7VS | neutral     | membran neutral         |
| GI_5032094-S | 149.1   | 295    | 136.5  | SLCO2A1  | <a href="#">NM_005630.1</a> | PGT;OATP2A1;SLC21A2                | lipid       | membran lipid           |
| GI_5032096-S | 355     | 392.8  | 262.4  | SLC6A8   | <a href="#">NM_005629.1</a> | CT1;CRTR                           | creatine:s  | integral to small       |
| GI_5032100-S | 438.9   | 478.8  | 605.7  | ABCC5    | <a href="#">NM_005688.1</a> | MRP5;SMRP;ABC33;MOATC;MOAT-        | organic     | membran small           |

|               |         |        |        |           |                             |                                    |              |                       |
|---------------|---------|--------|--------|-----------|-----------------------------|------------------------------------|--------------|-----------------------|
| GI_5032104-S  | 113.9   | 122.5  | 121.4  | SOLH      | <a href="#">NM_005632.1</a> | calpain                            | intracellula | proteolysis           |
| GI_5032124-S  | 439     | 546.3  | 281.6  | SS18      | <a href="#">NM_005637.1</a> | SYT;SSXT                           | transcripti  | nucleus cell growth   |
| GI_5032138-S  | 106.1   | 117.3  | 112.3  | SYT1      | <a href="#">NM_005639.1</a> | P65;SYT;SVP65                      | phospholi    | secretory synaptic    |
| GI_5032164-S  | 194.4   | 268    | 128.5  | TDO2      | <a href="#">NM_005651.1</a> | TDO;TPH2;TRPO                      | tryptophan   | neurotran             |
| GI_5032176-S  | 522.2   | 594.2  | 474.6  | TIEG      | <a href="#">NM_005655.1</a> | EGRA;KLF10;TIEG1                   | transcripti  | nucleus negative      |
| GI_5032180-S  | 642.5   | 729.1  | 806.7  | TIMM17B   | <a href="#">NM_005834.1</a> | JM3;TIM17B;DXS9822                 | protein      | mitochond mitochond   |
| GI_5032188-S  | 1000    | 1418.4 | 1262.1 | TP53BP1   | <a href="#">NM_005657.1</a> | p202;53BP1                         | P-element    | nucleoplas positive   |
| GI_5032210-S  | 317.7   | 393.7  | 346.1  | SLC35A2   | <a href="#">NM_005660.1</a> | UGT;UGAT;UGT1;UGT2;UGTL;UGALT      | UDP-         | Golgi UDP-            |
| GI_5032212-S  | 1414.6  | 1871.8 | 1776.6 | SLC35B1   | <a href="#">NM_005827.1</a> | UGTREL1                            | UDP-         | microsom small        |
| GI_5032214-S  | 281.8   | 342.3  | 234.6  | UK114     | <a href="#">NM_005836.1</a> | PSP;P14.5                          |              | cytoplasm regulation  |
| GI_5032218-S  | 602.7   | 557.9  | 468.5  | UST       | <a href="#">NM_005715.1</a> |                                    | sulfotransf  | integral to protein   |
| GI_5032222-S  | 120.6   | 122.6  | 116    | PLXNC1    | <a href="#">NM_005761.1</a> | VESPR;PLXN-C1                      | receptor     | integral to cell      |
| GI_5032234-S  | 79.7    | 143.1  | 88.4   | DSCR1L1   | <a href="#">NM_005822.1</a> | CSP2;RCN2;MCIP2;hRCN2;ZAKI-4       |              |                       |
| GI_5032242-S  | 96.6    | 96.2   | 93.3   | MKRN3     | <a href="#">NM_005664.1</a> | D15S9;RNF63;ZFP127;ZNF127          | ribonucleo   | ribonucleo            |
| GI_5032244-S  | 262.1   | 188.5  | 299.8  | ZNF239    | <a href="#">NM_005674.1</a> | MOK2;HOK-2                         | RNA          | nucleolus transcripti |
| GI_5032280-I  | 111.9   | 122.8  | 116.5  | DMD       | <a href="#">NM_000109.2</a> | BMD;DXS142;DXS164;DXS206;DXS230;DX | structural   | peripheral muscle     |
| GI_5032282-I  | 126.4   | 148.2  | 136.9  | DMD       | <a href="#">NM_004006.1</a> | BMD;DXS142;DXS164;DXS206;DXS230;DX | structural   | peripheral muscle     |
| GI_5032290-I  | 79.3    | 84.3   | 82.7   | DMD       | <a href="#">NM_004012.1</a> | BMD;DXS142;DXS164;DXS206;DXS230;DX | structural   | peripheral muscle     |
| GI_5032294-I  | 121     | 133.1  | 121.6  | DMD       | <a href="#">NM_004014.1</a> | BMD;DXS142;DXS164;DXS206;DXS230;DX | structural   | peripheral muscle     |
| GI_5032304-A  | 83.1    | 92     | 84.4   | DMD       | <a href="#">NM_004019.1</a> | BMD;DXS142;DXS164;DXS206;DXS230;DX | structural   | peripheral muscle     |
| GI_5032304-I  | 190.1   | 220.2  | 206.8  | DMD       | <a href="#">NM_004019.1</a> | BMD;DXS142;DXS164;DXS206;DXS230;DX | structural   | peripheral muscle     |
| GI_5032314-A  | 101.9   | 119.2  | 111.2  | DMD       | <a href="#">NM_004010.1</a> | BMD;DXS142;DXS164;DXS206;DXS230;DX | structural   | peripheral muscle     |
| GI_5032314-I  | 109.7   | 108.5  | 102.1  | DMD       | <a href="#">NM_004010.1</a> | BMD;DXS142;DXS164;DXS206;DXS230;DX | structural   | peripheral muscle     |
| GI_5123452-S  | 180.4   | 193.6  | 176.4  | GDF5      | <a href="#">NM_000557.2</a> | LAP4;CDMP1                         | protein      | TGFbeta               |
| GI_51470882-S | 106.9   | 121.2  | 113    | LOC283247 | <a href="#">XM_208058.5</a> |                                    |              |                       |
| GI_5174384-S  | 275.8   | 266.6  | 231.5  | ALKBH     | <a href="#">NM_006020.1</a> | ABH;alkB;hABH                      |              | DNA                   |
| GI_5174386-S  | 174.2   | 198.2  | 168.6  | PROM1     | <a href="#">NM_006017.1</a> | AC133;CD133;PROML1                 |              | integral to vision    |
| GI_5174388-S  | 688.1   | 729.1  | 675.3  | ACAT2     | <a href="#">NM_005891.1</a> |                                    | transferas   | cytoplasm lipid       |
| GI_5174392-S  | 2785.6  | 6272.5 | 4954.2 | ARMET     | <a href="#">NM_006010.1</a> | ARP                                |              | oncogene              |
| GI_5174402-S  | 193.5   | 214.9  | 217.3  | CACNA2D2  | <a href="#">NM_006030.1</a> | CACNA2D;gene 26;KIAA0558           |              | membran               |
| GI_5174408-S  | 658.8   | 778    | 891.2  | CD2BP2    | <a href="#">NM_006110.1</a> |                                    |              | cytoplasm antimicrob  |
| GI_5174410-S  | 119.6   | 106.7  | 97.6   | CD5L      | <a href="#">NM_005894.1</a> | SP-ALPHA                           | protein-     | membran cellular      |
| GI_5174418-S  | 1544.3  | 1677.7 | 1508.5 | CLPP      | <a href="#">NM_006012.1</a> |                                    | peptidase    | mitochond proteolysis |
| GI_5174422-S  | 2605.7  | 3111.9 | 2644.7 | C10orf7   | <a href="#">NM_006023.1</a> | D123                               |              | cell cycle            |
| GI_5174424-S  | 751.6   | 750.8  | 834.5  | DSCR3     | <a href="#">NM_006052.1</a> | DCRA;DSCRA                         |              |                       |
| GI_5174428-S  | 1015.2  | 1515.7 | 1321.3 | ACAA2     | <a href="#">NM_006111.1</a> | DSAEC                              | 3-oxoacyl-   | mitochond fatty acid  |
| GI_5174444-S  | 1759.5  | 2098   | 2043.5 | LANCL1    | <a href="#">NM_006055.1</a> | p40;GPR69A                         | G-protein    | integral to G-protein |
| GI_5174456-S  | 473.5   | 453    | 544.7  | KNTC2     | <a href="#">NM_006101.1</a> | HEC;HEC1                           |              | centromer mitotic     |
| GI_5174460-S  | 140.9   | 184.4  | 161.2  | HM74      | <a href="#">NM_006018.1</a> | PUMAG                              | G-protein    | integral to G-protein |
| GI_5174462-S  | 133.5   | 136.6  | 120.9  | HS3ST2    | <a href="#">NM_006043.1</a> | 30ST2;3OST2                        | sulfotransf  | integral to           |
| GI_5174464-S  | 5606.3  | 3081.8 | 3887.1 | HS3ST3A1  | <a href="#">NM_006042.1</a> | 30ST3A1;3OST3A1                    | sulfotransf  | integral to           |
| GI_5174466-S  | 104.8   | 112    | 104.5  | HS3ST3B1  | <a href="#">NM_006041.1</a> | 30ST3B1;3OST3B1                    | heparin-     | integral to heparan   |
| GI_5174472-S  | 277.6   | 333.3  | 285.9  | IPP       | <a href="#">NM_005897.1</a> |                                    | actin        | actin                 |
| GI_5174476-S  | 12652.2 | 14277  | 11581  | K-ALPHA-1 | <a href="#">NM_006082.1</a> |                                    | structural   | microtubul microtubul |



|              |        |        |        |           |                             |                                       |             |                          |
|--------------|--------|--------|--------|-----------|-----------------------------|---------------------------------------|-------------|--------------------------|
| GI_5174484-S | 1095   | 1206.1 | 675.2  | MRC2      | <a href="#">NM_006039.1</a> | UPARAP;ENDO180;KIAA0709               | sugar       | transport                |
| GI_5174494-S | 149.2  | 193.7  | 178.1  | DLEU2     | <a href="#">NM_006021.1</a> | LEU2;BCMSUN                           | tumor       | cell growth              |
| GI_5174496-S | 296.8  | 1393.8 | 746.7  | LIPG      | <a href="#">NM_006033.1</a> | EL;EDL                                | phospholi   | lipid                    |
| GI_5174508-S | 976.3  | 744.6  | 852.9  | MADH1     | <a href="#">NM_005900.1</a> | BSP1;JV4-                             | transcripti | integral to transformi   |
| GI_5174516-S | 541.9  | 555.3  | 588.5  | MADH7     | <a href="#">NM_005904.1</a> | MADH8;SMAD7                           | inhibitory  | intracellula TGFbeta     |
| GI_5174532-S | 84.7   | 85.2   | 76.4   | MC4R      | <a href="#">NM_005912.1</a> |                                       | melanocor   | integral to physiologi   |
| GI_5174534-S | 122.9  | 130.3  | 113.8  | MC5R      | <a href="#">NM_005913.1</a> |                                       | melanocor   | integral to G-protein    |
| GI_5174542-S | 144.2  | 211.7  | 187    | MEF2B     | <a href="#">NM_005919.1</a> | RSRFR2                                | transcripti | nucleus muscle           |
| GI_5174550-S | 111    | 137.6  | 117.8  | MEP1B     | <a href="#">NM_005925.1</a> |                                       | zinc ion    | extracellul digestion    |
| GI_5174552-S | 906.7  | 935.4  | 817.2  | MFAP1     | <a href="#">NM_005926.1</a> |                                       | extracellul | extracellul              |
| GI_5174556-S | 4896.5 | 4557   | 2799.7 | MFGE8     | <a href="#">NM_005928.1</a> | BA46;EDIL1;OAcGD3S;HsT19888           | milk        | lipid cell               |
| GI_5174566-S | 495.8  | 585.4  | 670.1  | MIPEP     | <a href="#">NM_005932.1</a> | MIP;HMIP                              | metalloen   | mitochond mitochond      |
| GI_5174568-S | 143.7  | 180.5  | 158.7  | MLL       | <a href="#">NM_005933.1</a> | HRX;TRX1;ALL-1;CXXC7;HTRX1            | RNA         | nucleus oncogene         |
| GI_5174572-S | 611.1  | 674.7  | 451.9  | MLLT2     | <a href="#">NM_005935.1</a> | AF4;AF-4                              | transcripti | nucleus oncogene         |
| GI_5174574-S | 171.1  | 193.7  | 182.8  | MLLT4     | <a href="#">NM_005936.1</a> | AF6;AF-6;AFADIN                       | protein C-  | intercellula cell        |
| GI_5174576-S | 149    | 191.8  | 173.1  | MLLT6     | <a href="#">NM_005937.1</a> | AF17                                  |             | regulation               |
| GI_5174578-S | 140.7  | 142.9  | 149.5  | MLLT7     | <a href="#">NM_005938.1</a> | AFX;AFX1;FOXO4                        | transcripti | nucleus cell cycle       |
| GI_5174588-S | 344.7  | 425.2  | 367.4  | MTF1      | <a href="#">NM_005955.1</a> | MTF-1                                 | DNA         | nucleus response         |
| GI_5174616-S | 251.8  | 268.1  | 229.2  | CARD4     | <a href="#">NM_006092.1</a> | NOD1                                  | caspase     | intracellula signal      |
| GI_5174618-S | 87.3   | 104.5  | 106.8  | OA48-18   | <a href="#">NM_006107.1</a> |                                       |             | response                 |
| GI_5174632-S | 116.8  | 113.5  | 95.6   | PKDREJ    | <a href="#">NM_006071.1</a> |                                       | cation      | membran acrosome         |
| GI_5174662-S | 109.7  | 95.2   | 98.2   | S100P     | <a href="#">NM_005980.1</a> |                                       | protein     |                          |
| GI_5174668-S | 178    | 210.9  | 189.2  | SCML2     | <a href="#">NM_006089.1</a> |                                       | DNA         | embryoge                 |
| GI_5174672-S | 217.1  | 170.4  | 169.8  | SEMA3A    | <a href="#">NM_006080.1</a> | SemaD;SEMA1;SEMAD;SEMAL;coll-1;Hsema- |             | extracellul developm     |
| GI_5174674-S | 91.9   | 91.5   | 99.4   | CRISP3    | <a href="#">NM_006061.1</a> | Aeg2;CRS3;SGP28;CRISP-3;dJ442L6.3     | molecular   | intracellula biological_ |
| GI_5174678-S | 625.3  | 782.6  | 765.9  | SIRPB1    | <a href="#">NM_006065.1</a> | SIRP-BETA-1                           |             | integral to cell         |
| GI_5174680-S | 129.2  | 151.6  | 129.3  | SIX1      | <a href="#">NM_005982.1</a> |                                       | transcripti | nucleus muscle           |
| GI_5174688-S | 272.5  | 264.1  | 257.1  | SNAPC5    | <a href="#">NM_006049.1</a> | SNAP19                                | transcripti | nucleus transcripti      |
| GI_5174692-S | 343    | 448.6  | 415.7  | SPRR2A    | <a href="#">NM_005988.1</a> |                                       | structural  | cytoplasm keratinocy     |
| GI_5174694-S | 101.9  | 116.9  | 95.7   | AKR1D1    | <a href="#">NM_005989.1</a> | SRD5B1;3o5bred                        | electron    | digestion                |
| GI_5174700-S | 934.3  | 1000.3 | 694.8  | STK10     | <a href="#">NM_005990.1</a> | LOK;PRO2729                           | protein     | protein                  |
| GI_5174702-I | 510.5  | 458.3  | 484.4  | MAP3K7IP1 | <a href="#">NM_006116.1</a> | TAB1                                  | TGFbeta     | activation               |
| GI_5174710-I | 111.2  | 118.6  | 107.2  | TBX1      | <a href="#">NM_005992.1</a> | DGS;TGA;CAFS;CTHM;DGCR;DORV;VCFS;     | RNA         | nucleus heart            |
| GI_5174714-S | 3358   | 2930.2 | 2947.7 | TCFL1     | <a href="#">NM_005997.1</a> | YL1;YL-1                              | RNA         | nucleus negative         |
| GI_5174722-S | 727.8  | 866.7  | 918.9  | TOMM40    | <a href="#">NM_006114.1</a> | TOM40;PEREC1;C19orf1;PER-             | protein     | mitochond anion          |
| GI_5174724-S | 127.3  | 136.8  | 124.4  | TRDN      | <a href="#">NM_006073.1</a> | TDN;TRISK;TRISK51                     |             | sarcoplas muscle         |
| GI_5174736-S | 1650.6 | 2501.4 | 2193.2 | TUBB4     | <a href="#">NM_006086.1</a> |                                       | structural  | cytoskelet microtubul    |
| GI_5174742-S | 5100.6 | 5567.2 | 5410.6 | UQCRFS1   | <a href="#">NM_006003.1</a> | RIS1                                  | ubiquinol-  | ubiquinol- electron      |
| GI_5174744-S | 4145.8 | 4513.1 | 3468.6 | UQCRH     | <a href="#">NM_006004.1</a> |                                       | ubiquinol-  | mitochond oxidative      |
| GI_5174754-S | 2690   | 3604.8 | 2416.7 | ZNF216    | <a href="#">NM_006007.1</a> | ZA20D2                                | zinc ion    | cellular_co biological_  |
| GI_5174761-S | 120.1  | 130.8  | 137.6  | MT3       | <a href="#">NM_005954.1</a> | GIF;GIFB;GRIF                         | heavy       | synaptic metal ion       |
| GI_5174773-S | 109.3  | 122.7  | 96.1   | APOA4     | <a href="#">NM_000482.2</a> |                                       | apolipopro  | lipid                    |
| GI_5174774-S | 153.4  | 198.8  | 162.1  | APOC1     | <a href="#">NM_001645.2</a> |                                       | lipid       | extracellul lipid        |
| GI_5209326-S | 566.8  | 655.3  | 504.6  | AMD1      | <a href="#">NM_001634.3</a> | AMD;ADOMETDC                          | lyase       | cellular_co spermine     |

|              |        |        |        |          |                             |                                   |              |                        |
|--------------|--------|--------|--------|----------|-----------------------------|-----------------------------------|--------------|------------------------|
| GI_5231299-S | 110    | 112.4  | 106.4  | ELAVL3   | <a href="#">NM_001420.2</a> | HUC;PLE21                         | mRNA 3'      | neurogene              |
| GI_5292160-A | 2134.4 | 2505.4 | 2265.1 | PSMD4    | <a href="#">NM_002810.1</a> | AF;ASF;S5A;AF-1;MCB1;Rpn10;pUB-R5 | 26S          |                        |
| GI_5360207-A | 1151.6 | 1347.5 | 1191.2 | IDS      | <a href="#">NM_006123.1</a> | MPS2;SIDS                         | iduronate-   | lysosome               |
| GI_5360207-I | 207.3  | 247    | 223.6  | IDS      | <a href="#">NM_006123.1</a> | MPS2;SIDS                         | iduronate-   | lysosome               |
| GI_5360209-S | 730    | 1084.2 | 875.6  | PVRL2    | <a href="#">NM_002856.1</a> | HVEB;PRR2;CD112;PVRR2             | coreceptor   | plasma virulence       |
| GI_5360211-I | 99.7   | 100.2  | 99.8   | GAS7     | <a href="#">NM_005890.1</a> | MGC1348;KIAA0394                  | transcripti  | kinesin cell cycle     |
| GI_5360213-S | 88.4   | 90.6   | 94.6   | GPC3     | <a href="#">NM_004484.2</a> | SGB;DGSX;SDYS;SGBS;SGBS1          | glypican     | proteoglyc cell growth |
| GI_5360215-I | 337.5  | 699.6  | 603.8  | IDS      | <a href="#">NM_000202.2</a> | MPS2;SIDS                         | iduronate-   | lysosome               |
| GI_5453548-S | 3101.3 | 3171.4 | 2386.3 | PRDX4    | <a href="#">NM_006406.1</a> | AOE37-2                           | thioredoxi   | l-kappaB               |
| GI_5453556-S | 1967.4 | 1912   | 1699.1 | ARIH2    | <a href="#">NM_006321.1</a> | ARI2;TRIAD1                       | zinc ion     | kinesin developm       |
| GI_5453558-S | 2254   | 2629.9 | 2515.5 | ATP5H    | <a href="#">NM_006356.1</a> | ATPQ;ATP5JD                       | hydrogen     | mitochondr proton      |
| GI_5453564-A | 287.9  | 287.1  | 311.7  | BAIAP2   | <a href="#">NM_006340.1</a> | BAP2;IRSP53                       | protein C-   | cytoplasm insulin      |
| GI_5453564-I | 1039.1 | 1050.4 | 1004.7 | BAIAP2   | <a href="#">NM_006340.1</a> | BAP2;IRSP53                       | protein C-   | cytoplasm insulin      |
| GI_5453566-S | 1537.2 | 1581.3 | 1507.2 | CFDP1    | <a href="#">NM_006324.1</a> | p97;BCNT;CP27                     |              |                        |
| GI_5453572-S | 134.1  | 165.4  | 222.5  | ARFGEF2  | <a href="#">NM_006420.1</a> | BIG2;dJ1164I10.1                  | guanyl-      | exocytosis             |
| GI_5453576-S | 88.4   | 98.5   | 88.7   | CXCL13   | <a href="#">NM_006419.1</a> | BLC;BCA1;ANGIE;BCA-               | chemokin     | soluble cytosolic      |
| GI_5453580-S | 89.9   | 92.1   | 92.6   | CDRT1    | <a href="#">NM_006382.1</a> | HREP;SM25H2                       |              |                        |
| GI_5453590-S | 372.7  | 305.3  | 408.3  | SMC2L1   | <a href="#">NM_006444.1</a> | CAPE;CAP-E;hCAP-E                 | ATP          | membran mitotic        |
| GI_5453596-S | 303    | 387.8  | 354    | CAPZA1   | <a href="#">NM_006135.1</a> | CAPZ;CAZ1;CAPPA1                  | actin        | F-actin cell           |
| GI_5453602-S | 7424.4 | 9142.5 | 8533   | CCT2     | <a href="#">NM_006431.1</a> | CCTB                              | chaperone    | cytoplasm regulation   |
| GI_5453606-S | 8992.1 | 8852.5 | 7939.7 | CCT7     | <a href="#">NM_006429.1</a> | Ccth;Nip7-1                       | chaperone    | cytoplasm protein      |
| GI_5453610-S | 108    | 113.8  | 110.1  | CD28     | <a href="#">NM_006139.1</a> | Tp44                              | defense/i    | integral to viral      |
| GI_5453622-S | 272.5  | 292    | 265.7  | CNK1     | <a href="#">NM_006314.1</a> | CNK;KSR                           | protein      | intercellula transmem  |
| GI_5453624-S | 202.7  | 252.9  | 211.6  | CROC4    | <a href="#">NM_006365.1</a> |                                   |              |                        |
| GI_5453630-S | 5446.9 | 6704.6 | 6892.9 | DDT      | <a href="#">NM_001355.2</a> |                                   | dopachro     | melanin                |
| GI_5453631-S | 1307.9 | 1330   | 1650   | SPAG5    | <a href="#">NM_006461.1</a> | MAP126;DEEPEST;hMAP126            |              |                        |
| GI_5453637-S | 579.1  | 398.9  | 367.4  | ARID3B   | <a href="#">NM_006465.1</a> | BDP;DRIL2                         | DNA          | nucleus biological_    |
| GI_5453639-S | 3907.9 | 4653.1 | 3872.5 | SHFM1    | <a href="#">NM_006304.1</a> | ECD;DSS1;SEM1;SHFD1;SHSF1;Shfdg1  | protein      | cellular_co cell cycle |
| GI_5453661-S | 354.6  | 503.7  | 458    | GCS1     | <a href="#">NM_006302.1</a> |                                   | glucosidas   | integral to N-linked   |
| GI_5453665-S | 67.1   | 67.3   | 68.7   | GPR19    | <a href="#">NM_006143.1</a> |                                   | G-protein    | integral to G-protein  |
| GI_5453667-S | 1447.2 | 1581.9 | 1779.1 | APG7L    | <a href="#">NM_006395.1</a> | GSA7                              | ubiquitin    | cytoplasm membran      |
| GI_5453673-S | 93     | 92.4   | 91.6   | GYG2     | <a href="#">NM_003918.1</a> | GN2;GN-2                          | glycogenin   | soluble glycogen       |
| GI_5453681-S | 1020.9 | 1469.3 | 1209.1 | HIS1     | <a href="#">NM_006460.1</a> | CLP1;MAQ1;HEXIM1                  | DNA          | nucleus regulation     |
| GI_5453683-A | 97.8   | 98.6   | 100.4  | CLECSF13 | <a href="#">NM_006344.1</a> | HML;HML2                          | lectin [goid | plasma heterophili     |
| GI_5453687-S | 97.3   | 116.2  | 100.5  | HSPB3    | <a href="#">NM_006308.1</a> | HSPL27                            | heat         |                        |
| GI_5453689-S | 908.2  | 913.1  | 1046.9 | DNAJB1   | <a href="#">NM_006145.1</a> | HSPF1                             | heat         | heat                   |
| GI_5453709-S | 5318.5 | 4870.8 | 4472.8 | LASP1    | <a href="#">NM_006148.1</a> | MLN50                             | SH3/SH2      |                        |
| GI_5453713-S | 993.4  | 1323.5 | 1014.6 | LIM      | <a href="#">NM_006457.1</a> | ENH                               | protein      | signal                 |
| GI_5453725-I | 98     | 104.1  | 96.9   | LRRFIP2  | <a href="#">NM_006309.1</a> | HUFI-2;FLJ20248                   |              |                        |
| GI_5453735-S | 104.6  | 106.3  | 248.1  | MAF      | <a href="#">NM_005360.2</a> |                                   | RNA          | chromatin transcripti  |
| GI_5453737-S | 286.2  | 144.6  | 112.7  | MERTK    | <a href="#">NM_006343.1</a> | mer;C-MER                         | transmem     | soluble protein        |
| GI_5453745-S | 538.5  | 622.1  | 588.9  | MTHFS    | <a href="#">NM_006441.1</a> | HsT19268                          |              |                        |
| GI_5453751-S | 96     | 108.5  | 98.3   | SLC34A2  | <a href="#">NM_006424.1</a> | NPTIib;NAPI-3B                    | sodium-      | membran phosphate      |
| GI_5453755-S | 178.3  | 223.7  | 198.4  | NCYM     | <a href="#">NM_006316.1</a> |                                   |              |                        |

|              |        |        |        |          |                             |                                     |             |              |              |
|--------------|--------|--------|--------|----------|-----------------------------|-------------------------------------|-------------|--------------|--------------|
| GI_5453757-S | 122.2  | 139.7  | 129.2  | NEBL     | <a href="#">NM_006393.1</a> |                                     | regulation  | actin        | muscle       |
| GI_5453759-S | 8234.2 | 9813.8 | 8869.6 | NEDD8    | <a href="#">NM_006156.1</a> | Nedd-8                              | ubiquitin   | nucleus      | proteolysis  |
| GI_5453761-S | 274.7  | 316.6  | 386.7  | NEFL     | <a href="#">NM_006158.1</a> | NFL;NF68;CMT1F;CMT2E                | structural  | neurofilam   |              |
| GI_5453765-S | 162    | 168.6  | 184.7  | NELL2    | <a href="#">NM_006159.1</a> | NRP2                                | structural  | extracellul  | cell         |
| GI_5453773-S | 140.7  | 208.5  | 160.5  | NFE2     | <a href="#">NM_006163.1</a> | p45;NF-E2                           | transcripti | nucleus      | hemostasi    |
| GI_5453787-S | 115.8  | 123.1  | 101.9  | NKX6-1   | <a href="#">NM_006168.1</a> | NKX6A;NKX6.1                        | transcripti | nucleus      | histogene    |
| GI_5453789-S | 6726.8 | 9264.7 | 4530.1 | NNMT     | <a href="#">NM_006169.1</a> |                                     |             |              |              |
| GI_5453791-S | 358.6  | 381.2  | 323.3  | NOL1     | <a href="#">NM_006170.1</a> | p120;NOP120                         | DNA         | nucleolus    | positive     |
| GI_5453799-S | 206.1  | 199.1  | 172.5  | NRGN     | <a href="#">NM_006176.1</a> | RC3;hng                             | calmoduli   |              | signal       |
| GI_5453801-S | 150.7  | 161.5  | 167.4  | NRL      | <a href="#">NM_006177.1</a> | RP27;D14S46E                        | specific    | nucleus      | regulation   |
| GI_5453809-S | 106.8  | 111.2  | 105.3  | NTN2L    | <a href="#">NM_006181.1</a> |                                     | structural  | cellular_co  | axon         |
| GI_5453813-S | 1087.6 | 956.2  | 599.7  | DDR2     | <a href="#">NM_006182.1</a> | TKT;NTRKR3;TYRO10                   | transmem    | integral to  | cell         |
| GI_5453819-S | 164    | 197    | 187.6  | NUMA1    | <a href="#">NM_006185.1</a> | NUMA                                | structural  | spindle      | nuclear      |
| GI_5453827-S | 93.9   | 78.7   | 82.1   | OMP      | <a href="#">NM_006189.1</a> |                                     |             | cytoplasm    | olfaction    |
| GI_5453833-S | 103.2  | 113.2  | 102.1  | POSTN    | <a href="#">NM_006475.1</a> | PN;OSF-2;periostin                  | cell        | extracellul  | skeletal     |
| GI_5453837-S | 553.8  | 764.2  | 598.7  | SSSCA1   | <a href="#">NM_006396.1</a> | p27                                 |             |              | mitosis      |
| GI_5453841-S | 6063.1 | 5258.6 | 5649.4 | PA2G4    | <a href="#">NM_006191.1</a> |                                     | methionyl   | nucleus      | cell cycle   |
| GI_5453849-S | 120.3  | 127    | 122.4  | PAX4     | <a href="#">NM_006193.1</a> |                                     | DNA         | nucleus      | histogene    |
| GI_5453857-S | 93.4   | 80.8   | 70.7   | PCP4     | <a href="#">NM_006198.1</a> | PEP-19                              |             |              | central      |
| GI_5453861-S | 334.2  | 316.1  | 275.1  | PDE4A    | <a href="#">NM_006202.1</a> | DPDE2                               | cAMP-       | insoluble    | signal       |
| GI_5453867-S | 89.9   | 92     | 84.9   | PDE6H    | <a href="#">NM_006205.1</a> |                                     | cGMP-       | nucleus      | vision       |
| GI_5453871-S | 352.5  | 805.6  | 267.3  | PDGFRL   | <a href="#">NM_006207.1</a> | PDGRL;PRLTS                         | platelet    |              |              |
| GI_5453877-S | 106.3  | 101.3  | 111.4  | PFKFB2   | <a href="#">NM_006212.1</a> |                                     | 6-          |              | fructose     |
| GI_5453889-S | 97.6   | 100.4  | 90     | PIBF1    | <a href="#">NM_006346.1</a> |                                     |             |              |              |
| GI_5453891-S | 280.7  | 389.1  | 292    | PIK3CA   | <a href="#">NM_006218.1</a> |                                     | phosphati   | phosphoin    | oncogene     |
| GI_5453893-S | 306.6  | 351.7  | 323.2  | PIK3CB   | <a href="#">NM_006219.1</a> | PIK3C1;p110-BETA                    | 1-          | phosphoin    | activation   |
| GI_5453897-S | 2560.6 | 2916.6 | 3200.3 | PIN1     | <a href="#">NM_006221.1</a> | DOD                                 | peptidyl-   | nucleus      | regulation   |
| GI_5453899-S | 121.1  | 149.3  | 129.5  | PIN1L    | <a href="#">NM_006222.1</a> |                                     | molecular   | cellular_co  | biological_  |
| GI_5453909-S | 201.7  | 218.5  | 211.1  | PLCD1    | <a href="#">NM_006225.1</a> |                                     | phospholi   |              | phosphati    |
| GI_5453911-S | 93.5   | 93.8   | 108    | PLCL1    | <a href="#">NM_006226.1</a> | PLCE;PLCL;PLC-L;PLDL1               | phospholi   |              | intracellula |
| GI_5453915-S | 4556.8 | 5223.7 | 4032.3 | PGRMC2   | <a href="#">NM_006320.1</a> | DG6;PMBP                            | steroid     | integral to  |              |
| GI_5453919-S | 115.9  | 135    | 129.3  | PNLIPRP1 | <a href="#">NM_006229.1</a> | PLRP1                               | triacylglyc | extracellul  |              |
| GI_5453923-S | 5050.6 | 4119   | 3752   | POLD2    | <a href="#">NM_006230.1</a> |                                     | eta DNA     | nucleus      | DNA          |
| GI_5453925-S | 157.4  | 196.7  | 201.7  | POLE     | <a href="#">NM_006231.1</a> | POLE1;FLJ21434                      | DNA         | nucleus      | DNA          |
| GI_5453933-S | 190.3  | 231.2  | 196.8  | POU2AF1  | <a href="#">NM_006235.1</a> | BOB1;OBF1;OCAB;OBF-1                | transcripti | nucleus      | humoral      |
| GI_5453935-S | 104.4  | 97.7   | 91.2   | POU3F3   | <a href="#">NM_006236.1</a> | BRN1;OTF8                           | transcripti | nucleus      | central      |
| GI_5453959-S | 1113.1 | 1517.8 | 1545.3 | RABAC1   | <a href="#">NM_006423.1</a> | PRA1;YIP3                           |             |              | nonselecti   |
| GI_5453965-S | 115    | 134.4  | 117.1  | PRKAA2   | <a href="#">NM_006252.1</a> | AMPK;PRKAA                          | protein     |              | protein      |
| GI_5453973-S | 287.9  | 320.9  | 275.9  | PRKCL2   | <a href="#">NM_006256.1</a> | PRK2                                | protein     | intracellula | protein      |
| GI_5453975-S | 112.9  | 138    | 127.8  | PRKCQ    | <a href="#">NM_006257.1</a> |                                     | protein-    | intracellula | protein      |
| GI_5453977-S | 86.7   | 99.7   | 84.8   | PRKG2    | <a href="#">NM_006259.1</a> | PRKGR2                              | protein     |              | protein      |
| GI_5453993-S | 2798.2 | 2376.8 | 2605.9 | RAD21    | <a href="#">NM_006265.1</a> | HR21;MCD1;NXP1;SCC1;hHR21;HRAD21;KI | calcium     | nucleus      | meiotic      |
| GI_5453997-S | 826.1  | 866.7  | 636.5  | IPO7     | <a href="#">NM_006391.1</a> | RANBP7                              | small       | nuclear      | nucleocyto   |
| GI_5453999-S | 216.3  | 233    | 186    | IPO8     | <a href="#">NM_006390.1</a> | RANBP8                              | RAN         | nuclear      | signal       |

|              |         |        |        |         |                             |                                          |              |                          |
|--------------|---------|--------|--------|---------|-----------------------------|------------------------------------------|--------------|--------------------------|
| GI_5454007-S | 99.3    | 100.3  | 90.1   | RIG     | <a href="#">NM_006394.1</a> |                                          |              |                          |
| GI_5454015-S | 99.9    | 91.6   | 83.4   | RP1     | <a href="#">NM_006269.1</a> | ORP1                                     | molecular    | phototrans               |
| GI_5454017-S | 109.3   | 102.4  | 107.4  | RPC32   | <a href="#">NM_006467.1</a> | RPC7                                     | DNA-         | transcripti regulation   |
| GI_5454025-A | 437     | 443.3  | 449.4  | RPP38   | <a href="#">NM_006414.1</a> |                                          | ribonuclea   | nucleolar tRNA           |
| GI_5454031-S | 105.5   | 104.1  | 107.5  | S100A1  | <a href="#">NM_006271.1</a> | S100;S100A                               | calcium      | cell shape               |
| GI_5454033-S | 147.3   | 146.4  | 137    | S100B   | <a href="#">NM_006272.1</a> | NEF;S100                                 | calcium      | extracellul axonogen     |
| GI_5454045-S | 996.8   | 1010.7 | 904.2  | SEC24B  | <a href="#">NM_006323.1</a> | SEC24                                    | vesicle      | COPII vesicle-           |
| GI_5454055-A | 89.3    | 90.7   | 94.9   | SORBS1  | <a href="#">NM_006434.1</a> | CAP;SH3D5;SORB1;SH3P12;ponsin;FLJ124     | cytoskelet   | cell-cell cell-matrix    |
| GI_5454057-S | 295.1   | 233.3  | 233.7  | SIAT4C  | <a href="#">NM_006278.1</a> | STZ;SAT3;CGS23;SIAT4;NANTA3;FLJ11867     | beta-        |                          |
| GI_5454063-S | 1221.4  | 1500.8 | 1523.8 | RBM14   | <a href="#">NM_006328.1</a> | SIP;COAA;SYTIP1                          | nucleic      |                          |
| GI_5454069-S | 269.2   | 255.2  | 311.3  | SLC9A6  | <a href="#">NM_006359.1</a> | NHE6;KIAA0267                            | sodium:hy    | integral to small        |
| GI_5454073-S | 1754.9  | 1571.8 | 1761.7 | NCOR2   | <a href="#">NM_006312.1</a> | SMRT;CTG26;SMRTE;TRAC1;TNRC14;TRA        | transcripti  | kinesin regulation       |
| GI_5454079-S | 238.1   | 272.5  | 265.6  | HMG20B  | <a href="#">NM_006339.1</a> | SOXL;HMGX2;BRAF25;BRAF35;SMARCE1r        | DNA          | chromatin                |
| GI_5454087-S | 8435.3  | 7074.7 | 6485.4 | ANP32B  | <a href="#">NM_006401.1</a> | APRIL;SSP29;PHAPI2                       |              | oncogene                 |
| GI_5454089-S | 1602    | 2086.7 | 1499.7 | SSR4    | <a href="#">NM_006280.1</a> | TRAPD                                    | calcium      | endoplas intracellula    |
| GI_5454091-S | 113     | 133.7  | 103.9  | SIAT7B  | <a href="#">NM_006456.1</a> | IV;III;STHM;SIAT7;ST6GalNAII;ST6GalNA II | sialyltransf | Golgi protein            |
| GI_5454093-S | 1120.1  | 931    | 435.1  | STK3    | <a href="#">NM_006281.1</a> | KRS1;MST2                                | protein      | cytoplasm heat           |
| GI_5454099-S | 1846.6  | 1689.7 | 1215.4 | TACC1   | <a href="#">NM_006283.1</a> | Ga55;KIAA1103                            |              | kinesin oncogene         |
| GI_5454101-S | 365.1   | 460.8  | 452.5  | TACC3   | <a href="#">NM_006342.1</a> | ERIC1                                    |              | kinesin cell growth      |
| GI_5454109-S | 282.2   | 338.6  | 389    | TESK1   | <a href="#">NM_006285.1</a> |                                          | protein      | spermatog                |
| GI_5454111-S | 377     | 358.3  | 315.5  | TFDP2   | <a href="#">NM_006286.1</a> | DP2;Dp-2                                 | transcripti  | oncogene                 |
| GI_5454119-S | 132.8   | 172.2  | 148.3  | TIMM17A | <a href="#">NM_006335.1</a> | TIM17;TIM17A                             | protein      | mitochond mitochond      |
| GI_5454143-S | 126.5   | 174.7  | 114.2  | UBD     | <a href="#">NM_006398.1</a> | FAT10                                    | polyubiquit  | proteolysis              |
| GI_5454155-S | 923.6   | 1139.9 | 1006.7 | USP16   | <a href="#">NM_006447.1</a> | Ubp-M                                    | ubiquitin-   | cytoplasm deubiquiti     |
| GI_5454157-S | 2253.6  | 2399.1 | 1790.5 | VAR52   | <a href="#">NM_006295.1</a> | G7A                                      | ATP          | intracellula translation |
| GI_5454161-S | 5566.9  | 5320.9 | 1721.8 | TXNIP   | <a href="#">NM_006472.1</a> | THIF;VDUP1;HHCPA78;EST01027              | molecular    | cellular_co sensory      |
| GI_5454165-S | 690.6   | 647.1  | 721.6  | VTI1B   | <a href="#">NM_006370.1</a> | VTI1;VTI2;VTI1L                          | receptor     | nonselecti               |
| GI_5454171-S | 584.5   | 501    | 607.8  | XRCC1   | <a href="#">NM_006297.1</a> | RCC                                      | DNA          | nucleus single           |
| GI_5454177-S | 87.8    | 104.7  | 89.7   | ZNF192  | <a href="#">NM_006298.1</a> | LD5-1                                    | protein      | nucleus regulation       |
| GI_5454181-S | 107.3   | 89.7   | 89.2   | ZNF230  | <a href="#">NM_006300.1</a> | FDZF2                                    | DNA          | nucleus regulation       |
| GI_5540099-S | 340.3   | 282.8  | 385.3  | MAN2A2  | <a href="#">NM_006122.1</a> | MANA2X;PRO2198;HsT19662                  | mannosyl-    | Golgi carbohydr          |
| GI_5579451-S | 92.8    | 90.9   | 84.3   | CALB1   | <a href="#">NM_004929.2</a> | CALB                                     | protein      |                          |
| GI_5579457-S | 15332.1 | 14301  | 13984  | EIF3S8  | <a href="#">NM_003752.2</a> | eIF3-p110                                | translation  | eukaryotic regulation    |
| GI_5579480-S | 128.1   | 127.7  | 122.1  | ARHN    | <a href="#">NM_005440.2</a> | RHO7;RhoN;Rnd2                           | GTPase       | signal                   |
| GI_5597012-S | 6759.5  | 5582.4 | 5702.5 | CLN2    | <a href="#">NM_000391.2</a> | TPP1;LINCL;TPP I;TPP-I                   | peptidase    | lysosome proteolysis     |
| GI_5670341-I | 176.5   | 196.5  | 185.8  | KHK     | <a href="#">NM_006488.1</a> |                                          | ketohehexok  |                          |
| GI_5713320-S | 209.2   | 231.5  | 224.7  | SELL    | <a href="#">NM_000655.2</a> | TQ1;LAM1;LNHR;LSEL;CD62L;LAM-            | selectin     | integral to cell         |
| GI_5729727-S | 93.1    | 106.7  | 97.9   | ALX3    | <a href="#">NM_006492.1</a> |                                          | transcripti  | nucleus regulation       |
| GI_5729737-S | 659.8   | 688.4  | 819.3  | BLCAP   | <a href="#">NM_006698.1</a> | BC10                                     | molecular    | integral to biological_  |
| GI_5729741-S | 577.1   | 671.6  | 628.3  | AP4B1   | <a href="#">NM_006594.1</a> | BETA-4                                   | vesicle      | secretory nonselecti     |
| GI_5729745-S | 166.7   | 178    | 155    | BS69    | <a href="#">NM_006624.1</a> | ZMYND11;PRKCBP1L1                        | transcripti  | nucleus cell             |
| GI_5729757-S | 107.8   | 134.3  | 118    | CAPN9   | <a href="#">NM_006615.1</a> | GC36;nCL-4;CALPAIN9                      | calpain      | intracellula digestion   |
| GI_5729760-S | 141.7   | 172.8  | 186.4  | CCT6B   | <a href="#">NM_006584.1</a> | Cctz2;CCTZ-2;TSA303                      | protein      | protein                  |
| GI_5729764-S | 485.3   | 466    | 414.3  | CGRRF1  | <a href="#">NM_006568.1</a> | CGR19                                    |              | negative                 |

|              |        |        |        |         |                             |                             |               |                         |
|--------------|--------|--------|--------|---------|-----------------------------|-----------------------------|---------------|-------------------------|
| GI_5729771-S | 823.9  | 987.6  | 872.7  | CLN5    | <a href="#">NM_006493.1</a> | NCL                         | lysosome      | cell growth             |
| GI_5729789-S | 1424.1 | 1246.4 | 1449.3 | CTCF    | <a href="#">NM_006565.1</a> |                             | transcripti   | nucleus negative        |
| GI_5729795-S | 79     | 90.7   | 83.7   | CYP46A1 | <a href="#">NM_006668.1</a> | CP46;CYP46                  | steroid       | microsom cholestero     |
| GI_5729807-S | 98.1   | 113    | 97     | CD226   | <a href="#">NM_006566.1</a> | PTA1;DNAM1;DNAM-1;TLISA1    | cell          | integral to cell        |
| GI_5729809-S | 242.5  | 372.5  | 412.7  | EBP     | <a href="#">NM_006579.1</a> | CPX;CHO2;CPXD;CDPX2         | steroid       | endoplas cholestero     |
| GI_5729811-S | 645    | 812.2  | 739.6  | ELL     | <a href="#">NM_006532.1</a> | Men;ELL1                    | positive      | nucleus RNA             |
| GI_5729813-S | 158.4  | 187.7  | 157.8  | ERF     | <a href="#">NM_006494.1</a> | PE-2                        | ligand-       | nucleus regulation      |
| GI_5729815-S | 132.7  | 119.5  | 99.9   | CUGBP2  | <a href="#">NM_006561.1</a> | Etr-3;NAPOR;BRUNOL3;NAPOR-2 | RNA           | regulation              |
| GI_5729819-S | 666.4  | 770.9  | 763.6  | FARS1   | <a href="#">NM_006567.1</a> | dJ236A3.1                   | phenylala     | soluble tRNA            |
| GI_5729825-S | 140    | 159.6  | 159.1  | FHR-4   | <a href="#">NM_006684.1</a> | FHR4                        | apolipopro    |                         |
| GI_5729827-S | 473.9  | 708.4  | 611.6  | FLN29   | <a href="#">NM_006700.1</a> |                             |               |                         |
| GI_5729829-S | 116.3  | 104.5  | 101.7  | FSBP    | <a href="#">NM_006550.1</a> |                             |               |                         |
| GI_5729839-S | 2149   | 2153.9 | 2817.3 | TUBGCP2 | <a href="#">NM_006659.1</a> | GCP2;Spc97p                 |               | microtubul microtubul   |
| GI_5729841-S | 5838.5 | 5945.2 | 3876.1 | GLO1    | <a href="#">NM_006708.1</a> | GLYI                        | lactoylglut   | carbohydr               |
| GI_5729843-S | 146.8  | 173.9  | 163.9  | GLRA3   | <a href="#">NM_006529.1</a> |                             | extracellul   | integral to chloride    |
| GI_5729849-S | 1053.4 | 1165   | 908.4  | GNAI3   | <a href="#">NM_006496.1</a> |                             | heterotrim    | peripheral negative     |
| GI_5729857-S | 160.9  | 221.4  | 196.7  | NCOA2   | <a href="#">NM_006540.1</a> | TIF2;GRIP1;NCoA-2           | transcripti   | nucleus regulation      |
| GI_5729867-S | 824.3  | 899.8  | 930    | HERC2   | <a href="#">NM_004667.2</a> | jd2;p528;D15F37S1;KIAA0393  | ubiquitin-    | intracellula ubiquitin  |
| GI_5729868-S | 101    | 84     | 98.1   | HHCM    | <a href="#">NM_006543.1</a> | hhc(M)                      |               | oncogene                |
| GI_5729870-S | 90.9   | 106.2  | 110.2  | HIC1    | <a href="#">NM_006497.1</a> |                             | protein       | nucleus cell growth     |
| GI_5729886-S | 108.6  | 133.5  | 101.2  | IQGAP2  | <a href="#">NM_006633.1</a> |                             | GTPase        | actin signal            |
| GI_5729898-S | 77.4   | 92.8   | 75.5   | KLRA1   | <a href="#">NM_006611.1</a> | Ly49;LY49L                  | lectin [goid  | plasma cell             |
| GI_5729902-S | 110.6  | 123.4  | 113.7  | LGALS2  | <a href="#">NM_006498.1</a> |                             | sugar         | soluble heterophili     |
| GI_5729906-S | 96.1   | 95.7   | 94     | SCGB1D1 | <a href="#">NM_006552.1</a> | LIPA;LPHA                   |               | extracellul             |
| GI_5729917-S | 138.9  | 175.1  | 174    | MCAM    | <a href="#">NM_006500.1</a> | CD146;MUC18                 | tumor         | integral to embryoge    |
| GI_5729919-S | 158.1  | 158.6  | 145.4  | ME3     | <a href="#">NM_006680.1</a> |                             | malate        | mitochond pyruvate      |
| GI_5729924-S | 193.7  | 641.4  | 173.7  | MIA     | <a href="#">NM_006533.1</a> | CD-RAP                      | growth        | extracellul cell        |
| GI_5729930-A | 236.2  | 252.1  | 217.1  | MOBP    | <a href="#">NM_006501.1</a> |                             |               | soluble neurogene       |
| GI_5729936-S | 1519.8 | 1366.1 | 1224.4 | MTX2    | <a href="#">NM_006554.1</a> |                             | protein       | mitochond mitochond     |
| GI_5729938-S | 2688.4 | 2107.2 | 2036.7 | CPSF4   | <a href="#">NM_006693.1</a> | NAR;NEB1;CPSF30             | RNA           | nucleus mRNA            |
| GI_5729946-S | 144.8  | 154.6  | 130.4  | NMU     | <a href="#">NM_006681.1</a> |                             | receptor      | G-protein               |
| GI_5729959-S | 101.9  | 121.7  | 99.1   | OR5I1   | <a href="#">NM_006637.1</a> | OLF1;HSOI1                  | receptor      | integral to signal      |
| GI_5729965-S | 191.3  | 363.8  | 193.7  | HCP5    | <a href="#">NM_006674.1</a> | P5-1;D6S2650E               | defense/i     | cellular_co biological_ |
| GI_5729971-S | 102.5  | 133.6  | 126.3  | PDE10A  | <a href="#">NM_006661.1</a> |                             | 3',5'-cyclic- | signal                  |
| GI_5729975-S | 352.9  | 589.8  | 437.7  | PHTF1   | <a href="#">NM_006608.1</a> | PHTF                        | transcripti   | nucleus transcripti     |
| GI_5729981-S | 161.1  | 179.2  | 160.5  | POLH    | <a href="#">NM_006502.1</a> | XPV;XP-V;RAD30A             | eta DNA       | nucleoplas regulation   |
| GI_5729985-S | 1124.1 | 1382.3 | 1480.8 | POP4    | <a href="#">NM_006627.1</a> | RPP29                       | ribonuclea    | ribonuclea tRNA         |
| GI_5730000-S | 810.8  | 698.8  | 476.3  | RAI     | <a href="#">NM_006663.1</a> | IASPP;PPP1R13L              | transcripti   | nucleus regulation      |
| GI_5730010-S | 172.9  | 174.8  | 158.7  | RFPL2   | <a href="#">NM_006605.1</a> | RNF79                       | protein       |                         |
| GI_5730012-S | 208.6  | 247.2  | 213    | RFPL3   | <a href="#">NM_006604.1</a> |                             | antisense     |                         |
| GI_5730016-S | 993.4  | 967.7  | 911.8  | RPP40   | <a href="#">NM_006638.1</a> | ba428J1.3                   | ribonuclea    | nucleolar tRNA          |
| GI_5730018-S | 121.2  | 125.5  | 127    | RRH     | <a href="#">NM_006583.1</a> |                             | G-protein     | integral to vision      |
| GI_5730020-S | 144.1  | 171.2  | 165.9  | RSC1A1  | <a href="#">NM_006511.1</a> | RS1                         | ion           | small                   |
| GI_5730022-S | 2119.6 | 2154.6 | 1995.1 | RUVBL2  | <a href="#">NM_006666.1</a> | ECP51;TIP48;CGI-46;TIP49B   | ATP           | cytosol protein         |

|              |        |        |        |          |                             |                                    |              |             |              |
|--------------|--------|--------|--------|----------|-----------------------------|------------------------------------|--------------|-------------|--------------|
| GI_5730024-S | 1779.5 | 1527   | 1469.8 | USP39    | <a href="#">NM_006590.1</a> | SAD1;CGI-21                        | pre-mRNA     | nucleus     | mRNA         |
| GI_5730026-S | 5274.8 | 5171.3 | 4405.3 | KHDRBS1  | <a href="#">NM_006559.1</a> | p62;Sam68                          | mRNA         |             | G1/S         |
| GI_5730032-S | 108.4  | 117.6  | 116.9  | SCN10A   | <a href="#">NM_006514.1</a> | hPN3                               | voltage-     | voltage-    | sodium       |
| GI_5730038-S | 751.4  | 922.9  | 647.6  | SETMAR   | <a href="#">NM_006515.1</a> |                                    | transposa    |             |              |
| GI_5730042-S | 330.9  | 991.7  | 128.2  | SLC12A7  | <a href="#">NM_006598.1</a> | KCC4;DKFZP434F076                  | potassium    | integral to | small        |
| GI_5730044-S | 178.9  | 197.8  | 275.3  | SLC16A2  | <a href="#">NM_006517.1</a> | MCT8;XPCT;DXS128;DXS128E           | monocarb     | membran     | monocarb     |
| GI_5730046-S | 92.2   | 120    | 96.7   | SLC17A3  | <a href="#">NM_006632.1</a> | NPT4                               | sodium:ph    | membran     | sodium       |
| GI_5730050-S | 339.8  | 708.2  | 444.5  | SLC2A1   | <a href="#">NM_006516.1</a> | GLUT;GLUT1                         | glucose      | membran     | glucose      |
| GI_5730054-S | 2731.3 | 6975   | 1265.6 | PLK2     | <a href="#">NM_006622.1</a> | SNK                                | ATP          |             | cell cycle   |
| GI_5730060-S | 229.1  | 278    | 238.5  | SPBPBP   | <a href="#">NM_006692.1</a> |                                    | transcripti  | nucleus     | respiratory  |
| GI_5730062-S | 231.1  | 403.5  | 307.3  | SPHAR    | <a href="#">NM_006542.1</a> |                                    |              |             | DNA          |
| GI_5730064-S | 130.9  | 148.1  | 157.6  | SPIN     | <a href="#">NM_006717.1</a> |                                    | cell cycle   |             | gametoge     |
| GI_5730066-S | 177.5  | 211.9  | 193.2  | SRCAP    | <a href="#">NM_006662.1</a> | KIAA0309                           | histone      | nucleus     | regulation   |
| GI_5730072-S | 464    | 229.3  | 374    | KHDRBS3  | <a href="#">NM_006558.1</a> | Etle;SALP;SLM2;SLM-2;T-STAR;etoile | protein      | nucleus     | spermatog    |
| GI_5730074-S | 127.6  | 140.6  | 117.9  | FGL2     | <a href="#">NM_006682.1</a> | T49;pT49                           |              | fibrinogen  |              |
| GI_5730084-S | 1440.6 | 1591.5 | 1398   | TCTEL1   | <a href="#">NM_006519.1</a> | CW-1;tctex-1                       | microtubul   | cytoplasm   | biological_  |
| GI_5730086-S | 686.4  | 766.9  | 801.2  | TCTE1L   | <a href="#">NM_006520.1</a> | TCTEX1L                            | molecular    | cellular_co | biological_  |
| GI_5730103-S | 110.3  | 108.2  | 97.2   | TXNL2    | <a href="#">NM_006541.1</a> | PICOT                              | electron     |             | electron     |
| GI_5730105-S | 95.7   | 102.5  | 101.8  | CXCR6    | <a href="#">NM_006564.1</a> | BONZO;STRL33;TYMSTR                | coreceptor   | integral to | viral        |
| GI_5730109-S | 1944.7 | 1851.2 | 1469.3 | USP3     | <a href="#">NM_006537.1</a> |                                    | ubiquitin-   |             | deubiquiti   |
| GI_5802969-S | 899.8  | 760.2  | 720.1  | AFG3L2   | <a href="#">NM_006796.1</a> |                                    | adenosine    | integral to | proteolysis  |
| GI_5802975-S | 442.8  | 596.2  | 594.6  | APM2     | <a href="#">NM_006829.1</a> |                                    | molecular    | cellular_co | biological_  |
| GI_5802979-S | 144.6  | 157.7  | 162.1  | ATF7     | <a href="#">NM_006856.1</a> | ATFA                               | transcripti  | nucleus     | regulation   |
| GI_5802981-S | 144.9  | 183.2  | 163.4  | PNRC1    | <a href="#">NM_006813.1</a> | B4-2;PRR2;PROL2                    | protein      | nucleus     |              |
| GI_5802983-S | 2599.8 | 2759.8 | 3512.4 | B3GNT6   | <a href="#">NM_006876.1</a> | IGAT;IGNT;BETA3GNTI                | acetylgluc   | Golgi       | oligosacch   |
| GI_5802993-S | 253.5  | 316.3  | 268.2  | CD6      | <a href="#">NM_006725.1</a> | TP120                              | lymphocyt    | integral to | immune       |
| GI_5803001-S | 111.1  | 110.5  | 112.1  | CLCN2    | <a href="#">NM_004366.2</a> | CLC2;ECA3;EGI3;EGMA;CIC-2          | voltage-     | membran     | small        |
| GI_5803004-S | 1035.5 | 1023   | 1071.9 | DIPA     | <a href="#">NM_006848.1</a> |                                    | molecular    | kinesin     | virulence    |
| GI_5803006-S | 637.8  | 606.6  | 473    | DNASE1L1 | <a href="#">NM_006730.1</a> | XIB;DNL1L;DNAS1L1                  | deoxyribo    |             | DNA          |
| GI_5803014-S | 380.9  | 368.7  | 366.8  | FCMD     | <a href="#">NM_006731.1</a> | FKTN;fukutin                       |              | extracellul | muscle       |
| GI_5803016-S | 410.3  | 590.9  | 709.2  | FOSB     | <a href="#">NM_006732.1</a> | GOS3;GOSB                          | transcripti  | nucleus     | behavior     |
| GI_5803022-S | 954.4  | 1159   | 1104.5 | LMAN2    | <a href="#">NM_006816.1</a> | GP36B;VIP36;C5orf8                 | lectin [goid | Golgi       | intracellula |
| GI_5803024-S | 169.1  | 179    | 167.3  | GPR75    | <a href="#">NM_006794.1</a> | GPR-chr2;WI-31133                  | G-protein    | integral to | vision       |
| GI_5803026-S | 106.9  | 105.4  | 99.6   | C1orf29  | <a href="#">NM_006820.1</a> | GS3686                             |              |             |              |
| GI_5803028-S | 536.3  | 610.5  | 666.2  | HEAB     | <a href="#">NM_006831.1</a> | CLP1;hClp1                         | GTP          | nucleus     | mRNA         |
| GI_5803051-S | 121.4  | 139.2  | 118.8  | KIR3DL2  | <a href="#">NM_006737.1</a> | CL-5;NKAT4;CD158K;NKAT4A;NKAT4B    | MHC-         | integral to | cellular     |
| GI_5803055-S | 127.8  | 128.5  | 150.2  | LAPTM5   | <a href="#">NM_006762.1</a> |                                    |              | lysosome    |              |
| GI_5803059-S | 85     | 109.9  | 108.5  | LILRB3   | <a href="#">NM_006864.1</a> | HL9;ILT5;LIR3;CD85A;LIR-3          | defense/i    | integral to | defense      |
| GI_5803065-S | 104.2  | 98.1   | 107.5  | LILRA1   | <a href="#">NM_006863.1</a> | LIR6;CD85i;LIR-6                   | antigen      | integral to | defense      |
| GI_5803067-S | 97.5   | 101.9  | 96.6   | LILRA2   | <a href="#">NM_006866.1</a> | ILT1;LIR7;CD85H;LIR-7              | antigen      | integral to | defense      |
| GI_5803073-S | 1565.9 | 1643.4 | 1665.4 | LZTR1    | <a href="#">NM_006767.1</a> | TCFL2;LZTR-1                       | transcripti  |             | embryoge     |
| GI_5803087-I | 189.7  | 206.6  | 179.9  | MAP3K4   | <a href="#">NM_005922.1</a> | MTK1;MEKK4;MAPKKK4;KIAA0213        | MAP          |             | activation   |
| GI_5803097-S | 1035.2 | 955.5  | 812.4  | MYST3    | <a href="#">NM_006766.1</a> | MOZ;ZNF220;RUNXBP2                 | DNA          | nucleus     | DNA          |
| GI_5803105-S | 112.9  | 122.6  | 121.2  | TTID     | <a href="#">NM_006790.1</a> | MYOT                               | structural   | actin       | muscle       |

|              |        |        |        |          |                             |                                    |             |             |              |       |
|--------------|--------|--------|--------|----------|-----------------------------|------------------------------------|-------------|-------------|--------------|-------|
| GI_5803108-S | 577    | 711.1  | 727.8  | OS-9     | <a href="#">NM_006812.1</a> |                                    | soluble     | cell growth |              |       |
| GI_5803110-S | 5368.3 | 5963   | 6443.4 | EBNA1BP2 | <a href="#">NM_006824.1</a> | P40;EBP2;NOBP                      | kinesin     | ribosome    |              |       |
| GI_5803114-S | 1489.2 | 1679   | 1342.5 | IMMT     | <a href="#">NM_006839.1</a> | HMP;P87;P89;P87/89;MITOFILIN       | molecular   | mitochond   | biological_  |       |
| GI_5803118-S | 105.2  | 86.2   | 94.5   | PDIP     | <a href="#">NM_006849.1</a> | PDI;PDA2;PDIR;PDIA2                | protein     | endoplas    | protein-ER   |       |
| GI_5803120-S | 1336.9 | 1244.1 | 977.8  | PDIR     | <a href="#">NM_006810.1</a> |                                    | protein     | endoplas    | response     |       |
| GI_5803124-S | 121.3  | 137.9  | 111.3  | PIM2     | <a href="#">NM_006875.1</a> |                                    | protein     |             | male         |       |
| GI_5803140-S | 767.8  | 1569.5 | 1672   | RBPMS    | <a href="#">NM_006867.1</a> | HERMES                             | RNA         |             | RNA          |       |
| GI_5803150-S | 1481.8 | 3098.9 | 1245.2 | GLIPR1   | <a href="#">NM_006851.1</a> | GLIPR;RTVP1                        |             | extracellul | pathogene    |       |
| GI_5803162-S | 180    | 192.7  | 198.9  | RAB40B   | <a href="#">NM_006822.1</a> | RAR;SEC4L                          | GTP         |             | protein      |       |
| GI_5803166-S | 1702.2 | 1790.2 | 1885.2 | SF3A3    | <a href="#">NM_006802.1</a> | PRP9;SAP61;SF3a60                  | pre-mRNA    | spliceoso   | mRNA         |       |
| GI_5803170-S | 93     | 103.6  | 98.5   | SLA      | <a href="#">NM_006748.1</a> | SLA1;SLAP                          | SH3/SH2     |             | intracellula |       |
| GI_5803174-S | 138.3  | 155.4  | 137.9  | SMA3     | <a href="#">NM_006780.1</a> | b55C20.2                           | hydrolase   |             | skeletal     |       |
| GI_5803180-S | 976.2  | 1203.7 | 1306.4 | STIP1    | <a href="#">NM_006819.1</a> | HOP;P60;ST11L;IEF-SSP-3521         |             | Golgi       | response     |       |
| GI_5803186-S | 5065.3 | 6458.1 | 7190.1 | TALDO1   | <a href="#">NM_006755.1</a> | TAL;TAL-H;TALDOR                   | transaldol  | cytoplasm   | carbohydr    |       |
| GI_5803202-S | 365.1  | 449.3  | 404.5  | TNNT3    | <a href="#">NM_006757.1</a> | DA2B;FSSV;AMCD2B                   | tropomyos   | troponin    | regulation   |       |
| GI_5803206-S | 5751   | 4669.5 | 4630.2 | U2AF1    | <a href="#">NM_006758.1</a> | RN;U2AF35;U2AFBP;RNU2AF1           | pre-mRNA    | Cajal body  | mRNA         |       |
| GI_5803212-S | 127.6  | 127.8  | 131.3  | UGT2A1   | <a href="#">NM_006798.1</a> |                                    | UDP-        | microsom    | perception   |       |
| GI_5803214-S | 201.9  | 250.2  | 213    | UPK2     | <a href="#">NM_006760.1</a> |                                    |             | integral to | developm     |       |
| GI_5803218-S | 145.1  | 165.7  | 149.6  | SPINK5   | <a href="#">NM_006846.1</a> | LEKTI;LETKI;VAKTI                  | serine      | extracellul | antimicrob   |       |
| GI_5803220-S | 164.5  | 146.9  | 144    | WDR3     | <a href="#">NM_006784.1</a> |                                    |             | nucleus     |              |       |
| GI_5870890-I | 585.9  | 601.1  | 542.5  | CRA      | <a href="#">NM_006697.1</a> |                                    |             |             |              |       |
| GI_5881412-S | 103.4  | 111.6  | 112    | ELN      | <a href="#">NM_000501.1</a> | WS;WBS;SVAS                        | extracellul | extracellul | respiratory  |       |
| GI_5901887-S | 99.1   | 102.2  | 98.8   | ADAMTS5  | <a href="#">NM_007038.1</a> | ADMP-2;ADAMTS11                    | integrin    | extracellul | proteolysis  |       |
| GI_5901891-S | 477.6  | 341.4  | 428.5  | WDHD1    | <a href="#">NM_007086.1</a> | AND-1                              | DNA         | nucleoplas  | regulation   |       |
| GI_5901909-S | 93.4   | 98.1   | 98.2   | CD160    | <a href="#">NM_007053.1</a> | NK1;BY55;NK28                      | MHC-        | integral to | cell         |       |
| GI_5901913-S | 94.8   | 102.1  | 96.5   | RAPGEF4  | <a href="#">NM_007023.1</a> | CGEF2;EPAC2;CAMP-GEFII             | guanyl-     | cAMP-       | G-protein    |       |
| GI_5901917-S | 106    | 106.5  | 101.1  | CART1    | <a href="#">NM_006982.1</a> |                                    | transcripti | nucleus     | brain        |       |
| GI_5901925-S | 2173.3 | 2529.1 | 2027.5 | CPSF5    | <a href="#">NM_007006.1</a> | CFIM25                             | RNA         | nucleus     | mRNA         |       |
| GI_5901927-S | 231.5  | 201.8  | 132.7  | CPSF6    | <a href="#">NM_007007.1</a> | CFIM;CFIM68;HPBR11-4;HPBR11-7      | RNA         | nucleus     | mRNA         |       |
| GI_5901929-S | 101.3  | 94.2   | 93.4   | CEACAM7  | <a href="#">NM_006890.1</a> | CGM2                               | tumor       | integral to |              |       |
| GI_5901931-S | 105.8  | 107.8  | 113.6  | LECT1    | <a href="#">NM_007015.1</a> | CHM1;CHM-I;BRICD3                  | molecular   | basement    | proteoglyc   |       |
| GI_5901935-S | 910.4  | 1553.3 | 969.1  | SLC39A7  | <a href="#">NM_006979.1</a> | KE4;HKE4;RING5;H2-                 | heavy       | integral to | heavy        |       |
| GI_5901937-S | 398.5  | 537.3  | 332    | C10orf10 | <a href="#">NM_007021.1</a> | FIG;DEPP                           | DNA         | nucleus     | regulation   |       |
| GI_5901943-S | 96     | 116.3  | 103.5  | EMILIN1  | <a href="#">NM_007046.1</a> | gp115;EMILIN;EMILIN-1;DKFZP586M121 | extracellul | extracellul | cell         |       |
| GI_5901965-S | 169.1  | 215    | 174.5  | HHLA3    | <a href="#">NM_007071.1</a> |                                    |             |             |              |       |
| GI_5901969-S | 205.2  | 250    | 225.8  | HNMT     | <a href="#">NM_006895.1</a> |                                    |             |             |              |       |
| GI_5901975-S | 2003.3 | 3184.9 | 1356.5 | HRASLS3  | <a href="#">NM_007069.1</a> | HREV107;HREV107-3;H-REV107-1       | molecular   | cellular_co | biological_  |       |
| GI_5901979-S | 419.8  | 587.5  | 434.2  | HSF2BP   | <a href="#">NM_007031.1</a> |                                    |             |             | spermatog    |       |
| GI_5901987-S | 1135.1 | 1123.1 | 1109.9 | JM5      | <a href="#">NM_007075.1</a> |                                    |             |             |              |       |
| GI_5901993-S | 743.4  | 806.7  | 1121.8 | KPTN     | <a href="#">NM_007059.1</a> |                                    | 2.00E+04    | actin       | microtubul   | actin |
| GI_5901997-S | 1103.2 | 878.2  | 782    | LSM6     | <a href="#">NM_007080.1</a> | YDR378C                            | small       | small       | mRNA         |       |
| GI_5902001-S | 1701.8 | 1869   | 1380.9 | DUSP14   | <a href="#">NM_007026.1</a> | MKP6;MKP-L                         | protein     |             | protein      |       |
| GI_5902003-S | 179.2  | 199.5  | 154.1  | MMP23B   | <a href="#">NM_006983.1</a> | MIFR;MMP22;MIFR-1                  |             |             |              |       |
| GI_5902011-S | 454.5  | 490.3  | 472.5  | MYO9A    | <a href="#">NM_006901.1</a> | FLJ11061                           |             | actin       | vision       |       |

|              |         |        |        |          |                             |                                     |             |             |             |
|--------------|---------|--------|--------|----------|-----------------------------|-------------------------------------|-------------|-------------|-------------|
| GI_5902013-S | 4008.5  | 4213.7 | 3603   | NPIP     | <a href="#">NM_006985.1</a> |                                     |             |             |             |
| GI_5902015-A | 10471.5 | 9553.3 | 8594.6 | RTN4     | <a href="#">NM_007008.1</a> | ASY;NOGO;NSP-CL;KIAA0886            | protein     | endoplas    | apoptosis   |
| GI_5902015-I | 99      | 95.9   | 89.2   | RTN4     | <a href="#">NM_007008.1</a> | ASY;NOGO;NSP-CL;KIAA0886            | protein     | endoplas    | apoptosis   |
| GI_5902017-S | 120.7   | 124.9  | 134    | p25      | <a href="#">NM_007030.1</a> | p24                                 | DNA         | nucleus     | regulation  |
| GI_5902033-S | 2068    | 1803.8 | 1853.6 | PWP1     | <a href="#">NM_007062.1</a> | IEF-SSP-9502                        |             | nucleus     | transcripti |
| GI_5902039-S | 535.9   | 495.7  | 421.8  | RABL2B   | <a href="#">NM_007081.1</a> |                                     | RAB small   |             | small       |
| GI_5902059-S | 161.9   | 186.3  | 172.2  | RP2      | <a href="#">NM_006915.1</a> |                                     | chaperone   |             | beta-       |
| GI_5902065-S | 391.9   | 459.9  | 396.8  | RPP14    | <a href="#">NM_007042.1</a> |                                     | RNA         | nucleus     | tRNA        |
| GI_5902071-S | 112.8   | 125.3  | 110.2  | SERPINB3 | <a href="#">NM_006919.1</a> | SCC;T4-A;SCCA1;HsT1196;SCCA-PD      | serine-     |             |             |
| GI_5902089-S | 513.9   | 697.6  | 875.9  | SLC2A3   | <a href="#">NM_006931.1</a> | GLUT3                               | glucose     | integral to | glucose     |
| GI_5902091-S | 129.4   | 123.7  | 117.5  | SLC5A3   | <a href="#">NM_006933.1</a> | SMIT;SMIT2                          | myo-        | integral to | small       |
| GI_5902093-S | 180.7   | 219.3  | 202.6  | SLC6A9   | <a href="#">NM_006934.1</a> | GLYT1                               | glycine:so  | membran     | small       |
| GI_5902095-S | 2976.2  | 2773.4 | 3138.6 | SMT3H1   | <a href="#">NM_006936.1</a> | SMT3A;SUMO-3                        |             | kinetochor  |             |
| GI_5902105-S | 229.2   | 277.4  | 229.2  | SOX15    | <a href="#">NM_006942.1</a> | SOX20;SOX26;SOX27                   | RNA         | nucleus     | male        |
| GI_5902107-S | 124.4   | 150.2  | 116.9  | SOX21    | <a href="#">NM_007084.1</a> | SOX25                               | RNA         | nucleus     | establish   |
| GI_5902115-S | 156     | 203.7  | 155.9  | ZBPB     | <a href="#">NM_007009.1</a> | SP38;ZBPB1                          |             | extracellul |             |
| GI_5902117-S | 148.3   | 133.9  | 118.2  | SPP2     | <a href="#">NM_006944.1</a> | SPP24                               | endopepti   | extracellul | skeletal    |
| GI_5902121-S | 2297.6  | 1738.5 | 1135.1 | SPTBN2   | <a href="#">NM_006946.1</a> |                                     | actin       | spectrin    | cell shape  |
| GI_5902127-S | 368.9   | 460.2  | 349.4  | STXBP2   | <a href="#">NM_006949.1</a> | UNC18B;UNC18-2;MUNC18-2             | protein     | cellular_co | protein     |
| GI_5902129-S | 253.5   | 237.1  | 218.2  | SFRS16   | <a href="#">NM_007056.1</a> | CLASP;SWAP2                         | DNA         | nucleus     | regulation  |
| GI_5902133-S | 106.9   | 121    | 111.3  | CORO1A   | <a href="#">NM_007074.1</a> | p57;TACO;CLABP;HCORO1;CLIPINA;Clabp | actin       | lysosomal   | transport   |
| GI_5902139-S | 99.6    | 89.1   | 91.7   | TRAD     | <a href="#">NM_007064.1</a> | DUET                                | protein     | actin       | protein     |
| GI_5902151-S | 230.8   | 263.6  | 243.5  | UPK3A    | <a href="#">NM_006953.1</a> | UPK3                                |             | integral to |             |
| GI_5902157-S | 632.8   | 517.8  | 510.8  | ZNF183   | <a href="#">NM_006978.1</a> | RNF113                              | nucleic     |             | developm    |
| GI_5902159-S | 88.9    | 113.4  | 144.7  | ZNF22    | <a href="#">NM_006963.1</a> | KOX15;HKR-T1;ZNF422;Zfp422          | zinc ion    | nucleus     | regulation  |
| GI_5902161-S | 137.3   | 158.1  | 160.8  | ZNF24    | <a href="#">NM_006965.1</a> | KOX17;RSG-A;ZNF191                  | DNA         | nucleus     | regulation  |
| GI_5902723-S | 344.8   | 461.8  | 392.5  | NOVA2    | <a href="#">NM_002516.1</a> | ANOVA;NOVA3                         | RNA         | nucleus     |             |
| GI_5902807-I | 119.8   | 133.6  | 119.5  | BMP1     | <a href="#">NM_006128.1</a> | TLD                                 | metallope   | extracellul | cartilage   |
| GI_5902809-I | 1642.9  | 2126.4 | 1147.6 | BMP1     | <a href="#">NM_006129.2</a> | TLD                                 | metallope   | extracellul | cartilage   |
| GI_5902810-A | 282.9   | 746.3  | 363    | BMP1     | <a href="#">NM_006130.1</a> | TLD                                 | metallope   | extracellul | cartilage   |
| GI_5902812-I | 344.9   | 435.4  | 382.1  | BMP1     | <a href="#">NM_006131.1</a> | TLD                                 | metallope   | extracellul | cartilage   |
| GI_5902814-I | 87.5    | 111    | 106.7  | BMP1     | <a href="#">NM_006132.1</a> | TLD                                 | metallope   | extracellul | cartilage   |
| GI_5921994-A | 102.6   | 107.3  | 109.4  | APOBEC1  | <a href="#">NM_005889.1</a> | BEDP;CDAR1                          | cytidine    |             | mRNA        |
| GI_5921996-S | 823.5   | 1251.8 | 1137.6 | CALR     | <a href="#">NM_004343.2</a> | RO;SSA;cC1qR                        | transcripti | endoplas    | regulation  |
| GI_5921997-S | 94.6    | 90.7   | 100.4  | CRHBP    | <a href="#">NM_001882.2</a> | CRFBP;CRF-BP                        | protein     | soluble     | learning    |
| GI_5921998-A | 324.4   | 385.3  | 363.4  | DYRK1B   | <a href="#">NM_006483.1</a> | MIRK                                | protein     | nucleus     | protein     |
| GI_5922002-A | 249     | 375.6  | 384.3  | DYRK2    | <a href="#">NM_003583.2</a> |                                     | protein     | cytoplasm   | protein     |
| GI_5922003-I | 119.7   | 130.3  | 115.1  | DYRK2    | <a href="#">NM_006482.1</a> |                                     | protein     | cytoplasm   | protein     |
| GI_5922005-S | 95.4    | 112.9  | 100.8  | F2       | <a href="#">NM_000506.2</a> | PT                                  | thrombin    | soluble     | tyrosine    |
| GI_5922012-S | 2354.8  | 1843.1 | 1444.8 | FZD2     | <a href="#">NM_001466.2</a> |                                     | receptor    | integral to | establish   |
| GI_6005714-S | 94.4    | 106.3  | 98.3   | SLC6A14  | <a href="#">NM_007231.1</a> | OBX;ATB(0+)                         | amino       | integral to | small       |
| GI_6005716-S | 744.4   | 711.1  | 567.8  | ATP5I    | <a href="#">NM_007100.1</a> | ATP5K                               | hydrogen    | mitochond   | proton      |
| GI_6005718-S | 123.2   | 126.9  | 121.2  | C14orf1  | <a href="#">NM_007176.1</a> |                                     | molecular   | integral to | biological_ |
| GI_6005726-S | 8818.6  | 8428   | 6708.7 | CCT8     | <a href="#">NM_006585.1</a> |                                     |             |             |             |



|              |        |        |        |           |                             |                                 |              |             |             |
|--------------|--------|--------|--------|-----------|-----------------------------|---------------------------------|--------------|-------------|-------------|
| GI_6005732-S | 1122.2 | 1392.5 | 952.9  | PICALM    | <a href="#">NM_007166.1</a> | LAP;CALM;CLTH                   |              |             | vesicle-    |
| GI_6005759-S | 270.8  | 300.3  | 394.3  | TUSC2     | <a href="#">NM_007275.1</a> | PAP;FUS1;PDAP2;C3orf11          |              |             | cell        |
| GI_6005763-S | 7887.5 | 10402  | 9809.1 | GABARAP   | <a href="#">NM_007278.1</a> | MM46                            | tubulin      | plasma      | protein     |
| GI_6005771-S | 302.8  | 252    | 206.1  | GPR       | <a href="#">NM_007223.1</a> |                                 | G-protein    | integral to | G-protein   |
| GI_6005773-S | 130.7  | 148.9  | 136.9  | GUCA2B    | <a href="#">NM_007102.1</a> | UGN;GCAP-II                     | calcium      |             | excretion   |
| GI_6005781-S | 211    | 240.5  | 230.4  | HRH3      | <a href="#">NM_007232.1</a> | HH3R;GPCR97                     | histamine    | integral to | G-protein   |
| GI_6005783-S | 1076.8 | 1167.5 | 1189   | HSGT1     | <a href="#">NM_007265.1</a> |                                 | transcripti  |             | regulation  |
| GI_6005787-S | 674.5  | 970    | 798.7  | NISCH     | <a href="#">NM_007184.1</a> | I-1;IRAS;KIAA0975               |              |             | electron    |
| GI_6005791-S | 189.2  | 215.4  | 187.1  | IRAK3     | <a href="#">NM_007199.1</a> | IRAK-M                          | receptor     |             | protein     |
| GI_6005793-S | 504.2  | 747.5  | 651.6  | JM4       | <a href="#">NM_007213.1</a> |                                 |              |             |             |
| GI_6005801-S | 335.9  | 333.1  | 239.9  | PROL4     | <a href="#">NM_007244.1</a> | LPRP;PRR4                       | DNA          | extracellul | physiologi  |
| GI_6005807-A | 2485.5 | 2493.7 | 2598.9 | MAN1B1    | <a href="#">NM_007230.1</a> | MANA-ER;DKFZP434I213            | mannosyl-    | membran     | oligosacch  |
| GI_6005825-S | 3051.4 | 3158.4 | 2403.9 | PACSIN2   | <a href="#">NM_007229.1</a> |                                 | vesicle      | kinesin     | actin       |
| GI_6005829-S | 221.3  | 230.7  | 254.2  | PKP3      | <a href="#">NM_007183.1</a> |                                 | cell         | cytoskelet  | cell        |
| GI_6005831-S | 711.9  | 683.8  | 745.8  | PMF1      | <a href="#">NM_007221.1</a> |                                 | transcripti  | transcripti | transcripti |
| GI_6005837-S | 447    | 459.9  | 336.8  | POLG2     | <a href="#">NM_007215.1</a> | HP55;POLB;POLGB;MTPOLB          | gamma        | mitochond   | DNA         |
| GI_6005847-S | 93.6   | 91.8   | 70.1   | POLI      | <a href="#">NM_007195.1</a> | RAD30B                          | iota DNA     | nucleoplas  | DNA         |
| GI_6005855-S | 135.6  | 137.6  | 143    | POU6F2    | <a href="#">NM_007252.1</a> | RPF-1                           | transcripti  | nucleus     | ganglion    |
| GI_6005869-S | 107.8  | 123.3  | 123.7  | SCRG1     | <a href="#">NM_007281.1</a> | SCRG-1                          |              | extracellul | neurogene   |
| GI_6005873-S | 182.4  | 178.3  | 180.8  | SLMAP     | <a href="#">NM_007159.1</a> | SLAP;KIAA1601                   |              | smooth      | muscle      |
| GI_6005877-S | 201    | 227.8  | 194.1  | SLC22A1LS | <a href="#">NM_007105.1</a> | BWR1B;BWSCR1B;ORCTL2S;p27-BWR1B | molecular    | cellular_co | biological_ |
| GI_6005885-S | 195.2  | 227.2  | 221.8  | STXBP3    | <a href="#">NM_007269.1</a> | PSP;MUNC18C;UNC-18C;MUNC18-3    | protein      | cellular_co | protein     |
| GI_6005889-S | 5309.3 | 5503.3 | 6040.9 | TCEB2     | <a href="#">NM_007108.1</a> | SIII                            | protein      | nucleus     | RNA         |
| GI_6005891-S | 166.2  | 171.4  | 168.2  | TCF19     | <a href="#">NM_007109.1</a> | SC1                             | transcripti  | nucleus     | regulation  |
| GI_6005895-S | 149.3  | 155.1  | 167    | TESK2     | <a href="#">NM_007170.1</a> |                                 | protein      | nucleus     | spermatog   |
| GI_6005903-S | 250.9  | 305.8  | 255.7  | TMF1      | <a href="#">NM_007114.1</a> | ARA160                          | transcripti  | kinesin     | regulation  |
| GI_6005909-S | 218.1  | 274.1  | 206.1  | TP53AP1   | <a href="#">NM_007233.1</a> | TP53TG1                         | signal       |             | response    |
| GI_6005913-S | 97.4   | 104.7  | 105.8  | TREH      | <a href="#">NM_007180.1</a> | TRE;TREA                        | alpha,alph   | plasma      | trehalose   |
| GI_6005919-S | 127.1  | 145.7  | 150.2  | TRH       | <a href="#">NM_007117.1</a> |                                 | thyrotropin- | soluble     | signal      |
| GI_6005923-S | 172.9  | 202.7  | 176    | TU3A      | <a href="#">NM_007177.1</a> | DRR1                            |              |             |             |
| GI_6005925-S | 195.8  | 235    | 179.3  | U2AF2     | <a href="#">NM_007279.1</a> | U2AF65                          | pre-mRNA     | nucleus     | mRNA        |
| GI_6005929-S | 155.3  | 181.3  | 163.7  | UGT1A4    | <a href="#">NM_007120.1</a> | UGT1D;HUG-BR2                   | glucurono    | microsom    | metabolis   |
| GI_6005937-S | 109    | 116    | 113.1  | UTRN      | <a href="#">NM_007124.1</a> | DRP;DMDL;DRP1                   | actin        | cytoskelet  | muscle      |
| GI_6005943-S | 87.1   | 85.7   | 84.2   | VIL1      | <a href="#">NM_007127.1</a> | VIL;D2S1471                     | actin        | F-actin     | protein     |
| GI_6005951-S | 1001.5 | 1294.4 | 960.4  | B4GALT7   | <a href="#">NM_007255.1</a> | XGPT1;XGALT1;XGALT-1;B4GAL-     | galactosylt  | integral to | proteoglyc  |
| GI_6005955-S | 1415.6 | 1226.1 | 1229   | DUSP12    | <a href="#">NM_007240.1</a> | YVH1;DUSP1                      | zinc ion     |             | cell growth |
| GI_6005957-S | 167.4  | 199.9  | 174.3  | Z39IG     | <a href="#">NM_007268.1</a> |                                 |              |             |             |
| GI_6005965-S | 243.4  | 215    | 200.7  | ZNF146    | <a href="#">NM_007145.1</a> | OZF                             | heparin      | nucleus     | regulation  |
| GI_6005967-S | 750.9  | 743.6  | 764.5  | ZNF161    | <a href="#">NM_007146.1</a> | DB1                             | specific     | nucleus     | cellular    |
| GI_6005971-S | 415.9  | 384.2  | 1064.5 | ZNF185    | <a href="#">NM_007150.1</a> |                                 | zinc ion     |             |             |
| GI_6005973-S | 494.7  | 512.9  | 455.6  | ZNF195    | <a href="#">NM_007152.1</a> |                                 | zinc ion     | nucleus     | regulation  |
| GI_6005975-S | 101.9  | 102.1  | 95.1   | ZNF208    | <a href="#">NM_007153.1</a> | PMIDP                           | zinc ion     | nucleus     | regulation  |
| GI_6005977-I | 106.9  | 123.6  | 115.9  | ZNF258    | <a href="#">NM_007167.1</a> | MYM;ZNF198L4                    | DNA          |             | developm    |
| GI_6005981-S | 123.1  | 125.1  | 121.5  | ZNF80     | <a href="#">NM_007136.1</a> | pT17                            | transcripti  | nucleus     | regulation  |

|              |         |        |        |          |                             |                                  |              |             |              |
|--------------|---------|--------|--------|----------|-----------------------------|----------------------------------|--------------|-------------|--------------|
| GI_6005991-S | 6746.2  | 10252  | 8142.5 | CALU     | <a href="#">NM_001219.2</a> |                                  | calcium      | Golgi       |              |
| GI_6005992-I | 94.3    | 87.1   | 77.5   | CLTA     | <a href="#">NM_007096.1</a> | LCA                              | calcium      | coated pit  | intracellula |
| GI_6005996-S | 90.8    | 94.4   | 101.7  | DOC2B    | <a href="#">NM_003585.1</a> |                                  | calcium-     | membran     | transport    |
| GI_6005998-S | 333.7   | 383    | 332.2  | DRPLA    | <a href="#">NM_001940.2</a> | B37;NOD;ATN1                     | protein      | cytoplasm   | central      |
| GI_6005999-S | 103.1   | 93.8   | 86.2   | GAS      | <a href="#">NM_000805.2</a> | GAST                             | peptide      | soluble     | smooth       |
| GI_6006000-S | 105.9   | 138.2  | 107.2  | GPX3     | <a href="#">NM_002084.2</a> |                                  | glutathion   | soluble     | response     |
| GI_6006002-S | 110.1   | 114.8  | 98.8   | GRIN2A   | <a href="#">NM_000833.2</a> | NR2A;NMDAR2A                     | N-methyl-    | integral to | learning     |
| GI_6006003-S | 107.9   | 104.3  | 99.7   | GRIN2B   | <a href="#">NM_000834.2</a> | NR2B;hNR3;NMDAR2B                | N-methyl-    | integral to | learning     |
| GI_6006004-S | 109.8   | 114.6  | 107.1  | GRIN2C   | <a href="#">NM_000835.2</a> | NR2C;NMDAR2C                     | N-methyl-    | integral to | small        |
| GI_6006005-S | 179     | 212.4  | 184.6  | GRM1     | <a href="#">NM_000838.2</a> | GRM1A;mGlu1;GPRC1A;MGLUR1;MGLUR1 | metabotro    | integral to | G-protein    |
| GI_6006006-S | 134.4   | 161    | 139.8  | GRM6     | <a href="#">NM_000843.2</a> | mGlu6;GPRC1F;MGLUR6              | metabotro    | integral to | metabotro    |
| GI_6006008-S | 2416.7  | 3464.9 | 3219.2 | ITGA2    | <a href="#">NM_002203.2</a> | BR;CD49B;VLAA2                   | collagen     | integrin    | blood        |
| GI_6006009-S | 285.8   | 428.5  | 344    | ITGA2B   | <a href="#">NM_000419.2</a> | GTA;CD41;GP2B;CD41B;GPIIb        | calcium-     | integral to | cell         |
| GI_6006010-A | 4263.9  | 4076.5 | 4075   | ITGA3    | <a href="#">NM_005501.1</a> | VL3A;CD49C;GAPB3;MSK18;VCA-      | cell         | integrin    | cell-matrix  |
| GI_6006013-S | 87      | 90.1   | 91.7   | ITGAM    | <a href="#">NM_000632.2</a> | CR3A;MO1A;CD11B;MAC-1;MAC1A      | cell         | integrin    | cell         |
| GI_6006015-S | 14644.3 | 16372  | 17160  | LGALS1   | <a href="#">NM_002305.2</a> | GBP                              | galactose    |             | apoptosis    |
| GI_6006016-S | 2130    | 3102.6 | 1190.6 | LGALS3BP | <a href="#">NM_005567.2</a> | 90K;MAC-2-BP                     | scavenger    | membran     | cellular     |
| GI_6006017-S | 104.6   | 112.2  | 104.3  | LGALS4   | <a href="#">NM_006149.2</a> | GAL4                             | lectin [goid | cytosol     | cell         |
| GI_6006018-S | 558.7   | 648.3  | 1046.6 | LIF      | <a href="#">NM_002309.2</a> | CDF;HILDA;D-FACTOR               | leukemia     | extracellul | positive     |
| GI_6006019-S | 1768.7  | 1275.8 | 1931.5 | MAD2L2   | <a href="#">NM_006341.2</a> | REV7;MAD2B                       |              |             | mitotic      |
| GI_6006021-S | 1647.5  | 1331.3 | 1126.6 | MAGOH    | <a href="#">NM_002370.2</a> |                                  | molecular    | nucleus     | sex          |
| GI_6006022-S | 760     | 867.1  | 784.1  | MAS1     | <a href="#">NM_002377.2</a> | MAS                              | angiotensi   | integral to | G-protein    |
| GI_6006024-S | 458.2   | 628.5  | 705.9  | MPP1     | <a href="#">NM_002436.2</a> | PEMP;EMP55;DXS552;DXS552E        | guanylate    | membran     | signal       |
| GI_6006025-S | 91.1    | 82.3   | 86.9   | MTAP     | <a href="#">NM_002451.2</a> | MSAP                             | phosphory    |             | nucleobas    |
| GI_6006027-S | 570.3   | 660.3  | 828.8  | NRAS     | <a href="#">NM_002524.2</a> | N-ras;NRAS1                      | GTPase       |             | oncogene     |
| GI_6006029-S | 1478.8  | 1408.2 | 1252   | TBCE     | <a href="#">NM_003193.2</a> | HRD;KCS;KCS1;pac2                | co-          | microtubul  | beta-        |
| GI_6006032-S | 69.5    | 204.7  | 154.5  | ITGA4    | <a href="#">NM_000885.2</a> | CD49D                            | cell         | integrin    | cell         |
| GI_6006037-S | 105.5   | 110.1  | 103.8  | HCRTR2   | <a href="#">NM_001526.2</a> | OX2R                             | neuropepti   | integral to | neuropepti   |
| GI_6006038-S | 257     | 265.5  | 230.5  | MAPK12   | <a href="#">NM_002969.2</a> | ERK3;ERK6;SAPK3;PRKM12;SAPK-     | MAP          | cytoplasm   | DNA          |
| GI_6006040-S | 213.4   | 320.5  | 254.9  | SLC25A20 | <a href="#">NM_000387.2</a> | CAC;CACT                         | lipid        | mitochond   | transport    |
| GI_6007850-S | 752.5   | 862.7  | 817.1  | ITGAE    | <a href="#">NM_002208.3</a> | CD103;HUMINAE                    | cell         | integrin    | leukocyte    |
| GI_6031156-S | 93.3    | 97.2   | 91.4   | ADORA3   | <a href="#">NM_000677.2</a> | A3AR                             | adenosine    | integral to | regulation   |
| GI_6031157-S | 91.3    | 92.6   | 98.3   | AGTRL2   | <a href="#">NM_005162.2</a> |                                  |              |             |              |
| GI_6031161-A | 315     | 1531.9 | 4591.5 | CALB2    | <a href="#">NM_007088.1</a> | CAL2                             | calcium      |             |              |
| GI_6031163-S | 117.6   | 150.7  | 115.6  | EGF      | <a href="#">NM_001963.2</a> | URG                              | epidermal    | integral to | activation   |
| GI_6031164-S | 528     | 1216.8 | 783    | F2R      | <a href="#">NM_001992.2</a> | TR;CF2R;PAR1                     | thrombin     | Golgi       | tyrosine     |
| GI_6031165-S | 101.3   | 102.3  | 80.4   | GALR1    | <a href="#">NM_001480.2</a> | GALNR;GALNR1                     | galanin      | integral to | negative     |
| GI_6031166-S | 819.5   | 1199.6 | 1166.2 | GPAA1    | <a href="#">NM_003801.2</a> | GAA1;hGAA1                       | GPI-         | plasma      | protein      |
| GI_6031167-S | 249.4   | 323.8  | 289.7  | IVD      | <a href="#">NM_002225.2</a> | ACAD2                            | isovaleryl-  | mitochond   | electron     |
| GI_6031177-A | 300.8   | 378.9  | 347.6  | MDM2     | <a href="#">NM_006882.1</a> | hdm2                             |              |             | negative     |
| GI_6031179-A | 855.3   | 747.1  | 814.4  | MAP3K4   | <a href="#">NM_006724.1</a> | MTK1;MEKK4;MAPKKK4;KIAA0213      | MAP          |             | activation   |
| GI_6031182-S | 522.9   | 717.8  | 781.3  | MGAT1    | <a href="#">NM_002406.2</a> | MGAT;GLCT1;GLYT1;GNT-1;GNT-      | acetylgluc   | Golgi       | aminoglyc    |
| GI_6031185-S | 117     | 128.6  | 128.1  | MGAT5    | <a href="#">NM_002410.2</a> | GNT-V                            | transferas   | Golgi       | N-linked     |
| GI_6031188-A | 152.5   | 152.2  | 159.9  | NOVA1    | <a href="#">NM_006491.1</a> | Nova-1                           | RNA          | nucleus     | locomotor    |

|              |         |        |        |          |                             |                                    |             |             |              |
|--------------|---------|--------|--------|----------|-----------------------------|------------------------------------|-------------|-------------|--------------|
| GI_6031188-I | 103.1   | 102    | 105.1  | NOVA1    | <a href="#">NM_006491.1</a> | Nova-1                             | RNA         | nucleus     | locomotor    |
| GI_6031190-S | 1751.5  | 1861.1 | 1727.5 | PHB      | <a href="#">NM_002634.2</a> |                                    | tumor       |             | cell growth  |
| GI_6031191-A | 7771.4  | 7465.9 | 5869.8 | SLC25A3  | <a href="#">NM_005888.1</a> | PHC                                | phosphate   | mitochond   | small        |
| GI_6031191-I | 131.4   | 124.2  | 122    | SLC25A3  | <a href="#">NM_005888.1</a> | PHC                                | phosphate   | mitochond   | small        |
| GI_6031195-S | 627.9   | 548.3  | 937.5  | PLAGL2   | <a href="#">NM_002657.2</a> |                                    | transcripti | nucleus     | regulation   |
| GI_6031196-S | 155.7   | 185.1  | 161    | SELP     | <a href="#">NM_003005.2</a> | CD62;GRMP;PSEL;CD62P;GMP140;PADGE  | selectin    | secretory   | defense      |
| GI_6031197-S | 144.5   | 162.4  | 153.9  | SELPLG   | <a href="#">NM_003006.2</a> | CD162;PSGL1;PSGL-1                 | bacterial   | integral to | cell         |
| GI_6031198-A | 162     | 190.4  | 171.2  | SHOX2    | <a href="#">NM_003030.2</a> | OG12;SHOT;OG12X;OGI2X              | transcripti | nucleus     | heart        |
| GI_6031198-I | 69.4    | 80.2   | 76.8   | SHOX2    | <a href="#">NM_003030.2</a> | OG12;SHOT;OG12X;OGI2X              | transcripti | nucleus     | heart        |
| GI_6031199-I | 88.6    | 80.9   | 93.3   | SHOX2    | <a href="#">NM_006884.1</a> | OG12;SHOT;OG12X;OGI2X              | transcripti | nucleus     | heart        |
| GI_6031201-I | 146.7   | 153.5  | 132.1  | SHOX     | <a href="#">NM_000451.2</a> | SS;GCFX;PHOG;SHOXY                 | transcripti | nucleus     | skeletal     |
| GI_6031202-A | 111.7   | 110.3  | 106.1  | SHOX     | <a href="#">NM_006883.1</a> | SS;GCFX;PHOG;SHOXY                 | transcripti | nucleus     | skeletal     |
| GI_6031202-I | 214.4   | 267.4  | 254    | SHOX     | <a href="#">NM_006883.1</a> | SS;GCFX;PHOG;SHOXY                 | transcripti | nucleus     | skeletal     |
| GI_6031204-I | 150.7   | 186.1  | 152    | TCF2     | <a href="#">NM_006481.1</a> | HNF2;LFB3;HNF1B;MODY5;VHNF1;HNF1be | DNA         | nucleus     | regulation   |
| GI_6031206-S | 2285.5  | 2148.6 | 2324.3 | PAFAH1B1 | <a href="#">NM_000430.2</a> | LIS1;MDCR;PAFAH                    | plasma      | cytoplasm   | lipid        |
| GI_6031207-S | 126.9   | 137    | 120.5  | GABRA5   | <a href="#">NM_000810.2</a> |                                    | transporte  | integral to | small        |
| GI_6041664-S | 3138.1  | 2256   | 2540.6 | AGPAT2   | <a href="#">NM_006412.2</a> | BSCL;BSCL1;LPAAB;LPAAT-beta        | lysosphosp  | integral to | phosphati    |
| GI_6041666-S | 125.3   | 119.3  | 87.9   | DCT      | <a href="#">NM_001922.2</a> | TYRP2                              | copper ion  | integral to | epidermal    |
| GI_6042194-S | 403.1   | 548.1  | 444.5  | SLC33A1  | <a href="#">NM_004733.2</a> | AT1;AT-1;ACATN                     | acetyl-     | endoplas    | small        |
| GI_6042195-S | 229.4   | 360.6  | 323.4  | CTSF     | <a href="#">NM_003793.2</a> | CATSF                              | lysosomal   | lysosome    | proteolysis  |
| GI_6042197-S | 111.2   | 163.9  | 167.7  | LIFR     | <a href="#">NM_002310.2</a> | SWS;SJS2;STWS                      | leukemia    | integral to | cell         |
| GI_6042199-I | 182.6   | 142.4  | 166.4  | MME      | <a href="#">NM_007287.1</a> | NEP;CD10;CALLA                     | metallope   | integral to | proteolysis  |
| GI_6042201-A | 12133.4 | 2580.3 | 4529.4 | MME      | <a href="#">NM_007288.1</a> | NEP;CD10;CALLA                     | metallope   | integral to | proteolysis  |
| GI_6042203-I | 225     | 197.1  | 185.2  | MME      | <a href="#">NM_007289.1</a> | NEP;CD10;CALLA                     | metallope   | integral to | proteolysis  |
| GI_6042205-I | 178.1   | 103.2  | 115.6  | MME      | <a href="#">NM_000902.2</a> | NEP;CD10;CALLA                     | metallope   | integral to | proteolysis  |
| GI_6042206-S | 1330.5  | 1433.9 | 1285.5 | RAN      | <a href="#">NM_006325.2</a> | TC4;ARA24                          | RAN small   | nuclear     | mitotic      |
| GI_6138970-S | 665.3   | 574.1  | 246.5  | ACP5     | <a href="#">NM_001611.2</a> | TRAP                               | acid        | integral to |              |
| GI_6138971-S | 138.7   | 149.1  | 150.6  | ADRBK1   | <a href="#">NM_001619.2</a> | GRK2;BARK1;BETA-ARK1               | protein     | soluble     | signal       |
| GI_6138972-S | 217.6   | 253.7  | 240    | ADRBK2   | <a href="#">NM_005160.2</a> | GRK3;BARK2                         | protein     |             | signal       |
| GI_6138973-S | 174.9   | 156.7  | 110.9  | AMH      | <a href="#">NM_000479.2</a> | MIF;MIS                            | glycopepti  | extracellul | sex          |
| GI_6138974-S | 415.6   | 334.9  | 333.7  | TIMM8A   | <a href="#">NM_004085.2</a> | DDP;MTS;DDP1;DFN1;MGC12262         | protein     | mitochond   | neurogene    |
| GI_6226959-S | 106.5   | 95.9   | 92.7   | A2M      | <a href="#">NM_000014.3</a> |                                    | protein     |             | intracellula |
| GI_6274549-S | 6969    | 6630.3 | 6196.2 | NDUFB9   | <a href="#">NM_005005.1</a> | B22;UQOR22                         | NADH        | mitochond   | hearing      |
| GI_6382056-I | 130     | 145.9  | 151.6  | ABL1     | <a href="#">NM_005157.2</a> | ABL;JTK7;p150;c-ABL;v-abl          | protein-    | nucleus     | S-specific   |
| GI_6382057-A | 665.8   | 749.2  | 689.1  | ABL1     | <a href="#">NM_007313.1</a> | ABL;JTK7;p150;c-ABL;v-abl          | protein-    | nucleus     | S-specific   |
| GI_6382057-I | 113     | 137.3  | 119.3  | ABL1     | <a href="#">NM_007313.1</a> | ABL;JTK7;p150;c-ABL;v-abl          | protein-    | nucleus     | S-specific   |
| GI_6382059-A | 249.2   | 209    | 214    | ABL2     | <a href="#">NM_005158.2</a> | ARG;ABLL                           | protein     | cytoplasm   | signal       |
| GI_6382059-I | 145     | 166    | 163.2  | ABL2     | <a href="#">NM_005158.2</a> | ARG;ABLL                           | protein     | cytoplasm   | signal       |
| GI_6382061-I | 98.9    | 114.5  | 96.5   | ABL2     | <a href="#">NM_007314.1</a> | ARG;ABLL                           | protein     | cytoplasm   | signal       |
| GI_6382063-S | 200.1   | 236.6  | 311.8  | ACPP     | <a href="#">NM_001099.2</a> | PAP                                | protein     | extracellul | regulation   |
| GI_6382069-S | 245.2   | 284.1  | 203.8  | CRABP2   | <a href="#">NM_001878.2</a> | RBP6;CRABP-II                      | retinoid    |             | epidermal    |
| GI_6382070-A | 344.2   | 272    | 302.1  | DIAPH2   | <a href="#">NM_007309.1</a> | DIA;POF;DIA2;POF2                  | receptor    | kinesin     | cytokinesi   |
| GI_6382070-I | 290.2   | 251.8  | 249.9  | DIAPH2   | <a href="#">NM_007309.1</a> | DIA;POF;DIA2;POF2                  | receptor    | kinesin     | cytokinesi   |
| GI_6382072-S | 157.2   | 281.2  | 189.6  | GCHFR    | <a href="#">NM_005258.2</a> | GFRP;HsT16933                      |             |             | nitric oxide |

|              |        |        |        |         |                             |                                 |             |              |                       |
|--------------|--------|--------|--------|---------|-----------------------------|---------------------------------|-------------|--------------|-----------------------|
| GI_6382077-S | 2845.1 | 3012   | 2628.6 | RANBP1  | <a href="#">NM_002882.2</a> |                                 | RAN         |              | signal                |
| GI_6382080-S | 88.5   | 85.3   | 90.4   | RASGRP1 | <a href="#">NM_005739.2</a> | V;RASGRP;CALDAG-GEFI            | lipid       | membran      | RAS                   |
| GI_6453816-S | 106.5  | 106.3  | 93.8   | IGF2    | <a href="#">NM_000612.2</a> |                                 |             |              |                       |
| GI_6453817-S | 649.5  | 577.9  | 870.1  | KIF22   | <a href="#">NM_007317.1</a> | KID;OBP;KNSL4;OBP-1;OBP-2       | microtubul  | kinetochor   | mitosis               |
| GI_6466447-S | 4330.6 | 5663.2 | 2631.1 | DSTN    | <a href="#">NM_006870.2</a> | ADF;ACTDP                       | actin       | intracellula | actin                 |
| GI_6466448-S | 184.5  | 230.6  | 198.4  | ADMR    | <a href="#">NM_007264.2</a> | AMR;7TMR;hrhAMR                 | transmem    | integral to  | cell                  |
| GI_6466449-A | 5605.5 | 6069.7 | 3460.5 | COMT    | <a href="#">NM_007310.1</a> |                                 | O-          | microsom     | catechola             |
| GI_6466451-I | 838    | 901.6  | 515.3  | COMT    | <a href="#">NM_000754.2</a> |                                 | O-          | microsom     | catechola             |
| GI_6466452-S | 571.2  | 645.2  | 564.5  | MAD2L1  | <a href="#">NM_002358.2</a> | MAD2;HSMAD2                     |             |              | kinetochor<br>mitotic |
| GI_6466453-S | 218.5  | 261.3  | 224.6  | SNCB    | <a href="#">NM_003085.2</a> |                                 | phospholi   | cytoplasm    |                       |
| GI_6466461-A | 193.2  | 224    | 225.8  | RANBP3  | <a href="#">NM_007320.1</a> | DKFZp586I1520                   | RAN         | nucleus      |                       |
| GI_6466463-I | 105.5  | 109.4  | 96.2   | RANBP3  | <a href="#">NM_007321.1</a> | DKFZp586I1520                   | RAN         | nucleus      |                       |
| GI_6552300-I | 144.6  | 153.6  | 128.4  | BRCA1   | <a href="#">NM_007295.1</a> | PSCP;RNF53                      | protein     | transcripti  | regulation            |
| GI_6552306-A | 273.3  | 193.7  | 249.8  | BRCA1   | <a href="#">NM_007298.1</a> | PSCP;RNF53                      | protein     | transcripti  | regulation            |
| GI_6552322-I | 110.1  | 103.4  | 89.2   | BRCA1   | <a href="#">NM_007306.1</a> | PSCP;RNF53                      | protein     | transcripti  | regulation            |
| GI_6552326-A | 873.8  | 1165.8 | 1302.1 | DIA1    | <a href="#">NM_000398.3</a> |                                 | cytochrom   | hemoglobi    | iron ion              |
| GI_6552327-I | 211.1  | 242.8  | 220.2  | DIA1    | <a href="#">NM_007326.1</a> |                                 | cytochrom   | hemoglobi    | iron ion              |
| GI_6552331-S | 5499.2 | 2549.7 | 3397.4 | FLOT1   | <a href="#">NM_005803.2</a> |                                 |             | caveola      |                       |
| GI_6552332-S | 334.7  | 613.9  | 807.5  | FOS     | <a href="#">NM_005252.2</a> |                                 | specific    | nucleus      | DNA                   |
| GI_6552333-S | 104.9  | 94     | 97.4   | GRIA1   | <a href="#">NM_000827.2</a> | GLUH1;GLUR1;GLURA;HBGR1         | alpha-      | integral to  | synaptic              |
| GI_6552334-S | 3091.4 | 3713.9 | 2593.1 | GSTP1   | <a href="#">NM_000852.2</a> | PI;DFN7;GST3;FAEES3             | glutathion  |              | central               |
| GI_6552335-S | 948.1  | 956.8  | 796.9  | PABPC4  | <a href="#">NM_003819.2</a> | APP1;APP-1;IPABP;PABP4          | poly(A)     | cytoplasm    | response              |
| GI_6552336-A | 135.3  | 141    | 141.6  | MADHIP  | <a href="#">NM_007323.1</a> | SARA;ZFYVE9                     | serine-     | cytoplasm    | SMAD                  |
| GI_6552336-I | 279.4  | 362.3  | 302.4  | MADHIP  | <a href="#">NM_007323.1</a> | SARA;ZFYVE9                     | serine-     | cytoplasm    | SMAD                  |
| GI_6552340-S | 1771   | 2686.9 | 1893.2 | SSR1    | <a href="#">NM_003144.2</a> | TRAPA                           | signal      | integral to  | cotranslati           |
| GI_6552341-S | 9298.3 | 14341  | 10875  | SSR2    | <a href="#">NM_003145.2</a> | TLAP;TRAPB                      | signal      | integral to  | cotranslati           |
| GI_6563384-S | 321.7  | 343.2  | 264    | PRKCN   | <a href="#">NM_005813.2</a> | EPK2;PKC-NU                     | protein     |              | protein               |
| GI_6594682-I | 134.4  | 125.6  | 144    | WHSC1   | <a href="#">NM_007331.1</a> | NSD2;TRX5;MMSET;REIIBP;KIAA1090 |             |              | embryoge              |
| GI_6598316-S | 390.6  | 592.8  | 668.5  | ACAA1   | <a href="#">NM_001607.2</a> | ACAA;THIO;PTHIO                 |             | peroxisom    | energy                |
| GI_6598317-A | 133.1  | 159    | 145.9  | AGRP    | <a href="#">NM_007316.1</a> | ART;AGRT;ASIP2                  | neuropepti  |              | neuropepti            |
| GI_6598319-S | 353.9  | 349.2  | 359.7  | AOX1    | <a href="#">NM_001159.2</a> | AO;AOH1                         | aldehyde    |              | oxygen                |
| GI_6598321-S | 333.4  | 313.1  | 410.7  | FXR2    | <a href="#">NM_004860.2</a> | FMR1L2                          | RNA         | polysome     | pathogene             |
| GI_6598322-S | 2614   | 2679.6 | 2139.1 | GDI2    | <a href="#">NM_001494.2</a> | RABGDIB                         | RAB GDP-    |              | nonselecti            |
| GI_6598326-S | 353.9  | 435.7  | 358.2  | TSTA3   | <a href="#">NM_003313.2</a> | FX;P35B                         | catalytic   |              | nucleotide-           |
| GI_6601589-S | 130.3  | 157.2  | 144.2  | TRPA1   | <a href="#">NM_007332.1</a> | ANKTM1                          | channel/p   | membran      | ion                   |
| GI_6631076-S | 2159.2 | 1903.4 | 1737.7 | BAG5    | <a href="#">NM_004873.1</a> | BAG-5;KIAA0873                  | protein     |              | protein               |
| GI_6631089-S | 89.8   | 89.3   | 77.7   | IMPG1   | <a href="#">NM_001563.2</a> | IPM150                          | extracellul | extracellul  | vision                |
| GI_6631092-S | 1006.7 | 1209.5 | 871.4  | MAN2C1  | <a href="#">NM_006715.1</a> | MANA;MANA1;MAN6A8               | alpha-      |              | carbohydr             |
| GI_6631099-S | 443.9  | 561.3  | 552.9  | NKTR    | <a href="#">NM_005385.2</a> |                                 | peptidyl-   | plasma       | protein               |
| GI_6631101-I | 172.4  | 199.7  | 188.1  | PCDH8   | <a href="#">NM_002590.2</a> | PAPC;ARCADLIN                   | calcium-    | integral to  | cell-cell             |
| GI_6631103-S | 1795.3 | 2199.6 | 1725.9 | EI24    | <a href="#">NM_004879.2</a> | PIG8;TP53I8                     |             |              | induction             |
| GI_6631114-S | 569.6  | 562.4  | 508.3  | POLS    | <a href="#">NM_006999.2</a> | POLK;TRF4;LAK-1;TRF4-1          | DNA         | nucleus      | DNA                   |
| GI_6633803-S | 206.3  | 259.9  | 201.5  | HBD     | <a href="#">NM_000519.2</a> |                                 | globin      | hemoglobi    | oxygen                |
| GI_6633805-S | 180.9  | 215.3  | 199.7  | HBZ     | <a href="#">NM_005332.2</a> |                                 | oxygen      | hemoglobi    | oxygen                |

|              |        |        |        |        |                             |                                    |             |             |              |
|--------------|--------|--------|--------|--------|-----------------------------|------------------------------------|-------------|-------------|--------------|
| GI_6633806-S | 106.5  | 116.3  | 111.4  | LMO2   | <a href="#">NM_005574.2</a> | TTG2;RBTN2;RHOM2;RBTNL1            |             | nucleus     | oncogene     |
| GI_6671584-S | 588.5  | 675.6  | 686.1  | ATF6   | <a href="#">NM_007348.1</a> |                                    | RNA         | nuclear     | unfolded     |
| GI_6671590-S | 101.7  | 106.7  | 102.8  | ATP5G2 | <a href="#">NM_005176.3</a> |                                    | hydrogen-   | proton-     | proton       |
| GI_6677700-A | 247.9  | 274.5  | 241.6  | GPR161 | <a href="#">NM_007369.1</a> | RE2                                |             |             |              |
| GI_6677700-I | 174.9  | 232.8  | 210.7  | GPR161 | <a href="#">NM_007369.1</a> | RE2                                |             |             |              |
| GI_6677928-S | 159.5  | 200.9  | 197.6  | SH3BGR | <a href="#">NM_007341.1</a> | SH3GBR;21-GARP                     | SH3/SH2     |             | protein      |
| GI_6677978-S | 104.3  | 114.8  | 104.6  | SIX6   | <a href="#">NM_007374.1</a> | Six9;OPTX2                         | transcripti | nucleus     | vision       |
| GI_6678648-S | 333.1  | 453    | 401.3  | KRTHA6 | <a href="#">NM_003771.3</a> | HA6;hHa6                           | structural  | kinesin     | biological_  |
| GI_6678675-S | 934.2  | 883    | 651    | COG2   | <a href="#">NM_007357.1</a> | LDLC                               | protein     | Golgi       | oligosacch   |
| GI_6678763-S | 390.8  | 441.1  | 376.1  | M96    | <a href="#">NM_007358.1</a> | MTF2                               | DNA         | nucleus     | regulation   |
| GI_6679051-S | 143.4  | 135.4  | 127.3  | KLRK1  | <a href="#">NM_007360.1</a> | KLR;NKG2D;NKG2-D;D12S2489E         | receptor    | integral to | signal       |
| GI_6679073-S | 638.2  | 611.5  | 413.2  | NUPL2  | <a href="#">NM_007342.1</a> | CG1;hCG1;NLP-1;NLP_1               | nuclear     | nucleus     | protein-     |
| GI_6679187-S | 107.7  | 103.8  | 96.6   | PROL3  | <a href="#">NM_006685.2</a> | P-B;PRL3                           | molecular   | cellular_co | biological_  |
| GI_6679188-S | 7320.5 | 6787.7 | 6034.2 | P24B   | <a href="#">NM_007364.1</a> |                                    | protein     | Golgi       | intracellula |
| GI_6679302-S | 2665.4 | 1904.5 | 1751.3 | PHLDA1 | <a href="#">NM_007350.1</a> | TDAG51;DT1P1B11                    |             | nucleus     |              |
| GI_6679624-S | 87.7   | 104.4  | 89.1   | ELA3B  | <a href="#">NM_007352.1</a> |                                    | pancreatic  | extracellul | cholester    |
| GI_6680080-S | 113    | 127.3  | 123.1  | GR6    | <a href="#">NM_007354.1</a> |                                    |             |             | oncogene     |
| GI_6680470-I | 274.9  | 330.5  | 289.4  | AIF1   | <a href="#">NM_004847.2</a> | IBA1;AIF-1;IRT-1                   |             | nucleus     | cell cycle   |
| GI_6715560-S | 140.3  | 172.6  | 145.3  | ABCC6  | <a href="#">NM_001171.2</a> | ARA;PXE;MLP1;MRP6;ABC34;MOATE;EST3 | ATP         | membran     | drug         |
| GI_6715585-S | 118.1  | 130.9  | 124.5  | AKT2   | <a href="#">NM_001626.2</a> | PRKBB;PKBBETA;RAC-BETA             | protein     |             | protein      |
| GI_6715587-S | 1521.2 | 1067   | 504.7  | BAG2   | <a href="#">NM_004282.2</a> | BAG-2                              | protein     |             | protein      |
| GI_6715588-S | 905.5  | 795.1  | 906.5  | BIG1   | <a href="#">NM_006421.2</a> | P200;ARFGEP1;DKFZP434L057          | guanyl-     |             | exocytosis   |
| GI_6715592-A | 183.5  | 212.9  | 189.2  | DLEC1  | <a href="#">NM_007336.1</a> | F56;DLC1                           | tumor       |             | negative     |
| GI_6715598-S | 162.4  | 188.5  | 160.5  | GDF9   | <a href="#">NM_005260.2</a> |                                    | growth      | extracellul | TGFbeta      |
| GI_6715601-A | 312.8  | 398.7  | 338.9  | GPX5   | <a href="#">NM_003996.2</a> |                                    | glutathion  | extracellul | response     |
| GI_6715608-S | 496.1  | 612.5  | 574    | MAPK4  | <a href="#">NM_002747.2</a> | ERK3;PRKM4;p63MAPK;ERK3-RELATED    | MAP         |             | protein      |
| GI_6715609-S | 114.1  | 104.8  | 108.7  | TULP1  | <a href="#">NM_003322.2</a> | RP14;TUBL1                         |             |             | vision       |
| GI_6755759-S | 158.8  | 164.8  | 149.1  | TDRKH  | <a href="#">NM_006862.2</a> | TDRD2                              | nucleic     |             |              |
| GI_6806880-A | 324    | 419.3  | 350    | AOC2   | <a href="#">NM_001158.2</a> | RAO;DAO2                           | amine       |             | biogenic     |
| GI_6806881-I | 117.9  | 126.7  | 111.9  | AOC2   | <a href="#">NM_009590.1</a> | RAO;DAO2                           | amine       |             | biogenic     |
| GI_6806883-S | 104.2  | 111.3  | 100.2  | AOC3   | <a href="#">NM_003734.2</a> | HPAO;VAP1;VAP-1                    | amine       | integral to | amine        |
| GI_6806884-I | 334.5  | 449.1  | 392.3  | ARSD   | <a href="#">NM_009589.1</a> |                                    | arylsulfata |             |              |
| GI_6806888-S | 1025.5 | 691.9  | 688.2  | HSF2   | <a href="#">NM_004506.2</a> |                                    | transcripti | nucleus     | heat         |
| GI_6806889-I | 281.6  | 359.3  | 315.5  | LGALS9 | <a href="#">NM_009587.1</a> |                                    | galactose   |             | heterophili  |
| GI_6806891-A | 362.1  | 438.2  | 396.6  | LGALS9 | <a href="#">NM_002308.2</a> |                                    | galactose   |             | heterophili  |
| GI_6806892-S | 125.4  | 143.8  | 129.9  | LTA    | <a href="#">NM_000595.2</a> | LT;TNFB;TNFSF1                     | receptor    | membran     | induction    |
| GI_6806894-S | 164.9  | 160    | 187.5  | PKP4   | <a href="#">NM_003628.2</a> | p0071                              | structural  | kinesin     | cell         |
| GI_6806896-I | 87.2   | 81.2   | 90.8   | SNCA   | <a href="#">NM_000345.2</a> | PD1;NACP;PARK1                     | structural  | cytoplasm   | anti-        |
| GI_6806897-A | 230.7  | 274    | 255.8  | SNCA   | <a href="#">NM_007308.1</a> | PD1;NACP;PARK1                     | structural  | cytoplasm   | anti-        |
| GI_6806899-S | 778.3  | 1060.9 | 660.6  | SQLE   | <a href="#">NM_003129.2</a> |                                    | squalene    | microsom    | electron     |
| GI_6806912-S | 646.4  | 609.3  | 620.6  | CENTA1 | <a href="#">NM_006869.1</a> | GCS1L;p42IP4                       | phospholi   | nucleus     | cell         |
| GI_6806918-S | 169.9  | 206.3  | 172.1  | LRP2   | <a href="#">NM_004525.1</a> | gp330                              | LDL         | lysosome    | receptor     |
| GI_6806920-S | 126.2  | 147.9  | 142.2  | SLC9A3 | <a href="#">NM_004174.1</a> | NHE3                               | sodium:hy   | integral to | sodium       |
| GI_6857798-S | 613.1  | 655.5  | 579.4  | PGRMC1 | <a href="#">NM_006667.2</a> | MPR;HPR6.6                         | steroid     | microsom    | electron     |

|              |        |        |                 |                             |                                        |             |             |             |
|--------------|--------|--------|-----------------|-----------------------------|----------------------------------------|-------------|-------------|-------------|
| GI_6857817-S | 1500.7 | 1278.3 | 1113 NPM3       | <a href="#">NM_006993.1</a> |                                        | nucleic     | nucleus     |             |
| GI_6912241-S | 200.5  | 243.3  | 221.4 APPL      | <a href="#">NM_012096.1</a> | DIP13alpha                             | protein     | cytoplasm   | signal      |
| GI_6912245-S | 723.1  | 578.7  | 498 ASE-1       | <a href="#">NM_012099.1</a> | CAST                                   | antisense   | nucleolus   | rRNA        |
| GI_6912247-S | 636.5  | 552.8  | 670.6 DNPEP     | <a href="#">NM_012100.1</a> | DAP;ASPEP                              | aminopept   | cytoplasm   | peptide     |
| GI_6912269-S | 216.3  | 242.9  | 240.6 BP75      | <a href="#">NM_012107.1</a> |                                        |             |             |             |
| GI_6912271-S | 99.8   | 89.6   | 82.8 BRDG1      | <a href="#">NM_012108.1</a> | STAP1;STAP-1                           |             |             | membran     |
| GI_6912273-S | 283.1  | 487.4  | 227.3 C19orf4   | <a href="#">NM_012109.1</a> | BSMAP                                  |             | integral to |             |
| GI_6912277-S | 3324   | 3679.8 | 2614.7 COMMD3   | <a href="#">NM_012071.1</a> | BUP;C10orf8                            |             |             |             |
| GI_6912279-S | 4014.5 | 5372.7 | 4286.4 AHSA1    | <a href="#">NM_012111.1</a> | p38;AHA1;C14orf3                       |             |             |             |
| GI_6912283-S | 162.4  | 214.8  | 183.5 CA14      | <a href="#">NM_012113.1</a> |                                        | carbonate   | integral to | one-        |
| GI_6912285-S | 89.4   | 98.6   | 102.8 CASP14    | <a href="#">NM_012114.1</a> | MICE                                   | caspase     |             | epidermal   |
| GI_6912291-S | 417.1  | 562.7  | 440.7 CBX5      | <a href="#">NM_012117.1</a> | HP1;HP1-ALPHA;HP1Hs-alpha              | lamin/chro  | nuclear     | chromatin   |
| GI_6912299-A | 831.2  | 606.3  | 670.9 MTO1      | <a href="#">NM_012123.1</a> | CGI-02                                 | molecular   |             | electron    |
| GI_6912301-S | 2833.8 | 1885.7 | 1989.6 C16orf35 | <a href="#">NM_012075.1</a> | -14;CGTHBA                             | molecular   | cellular_co | biological_ |
| GI_6912303-S | 361.8  | 398.2  | 343.8 CHORDC1   | <a href="#">NM_012124.1</a> | CHP1                                   | molecular   | cellular_co | biological_ |
| GI_6912305-A | 136    | 156.4  | 135 CHST5       | <a href="#">NM_012126.1</a> | FLJ22167                               | sulfotransf | integral to | protein     |
| GI_6912305-I | 162.1  | 188.9  | 167.8 CHST5     | <a href="#">NM_012126.1</a> | FLJ22167                               | sulfotransf | integral to | protein     |
| GI_6912315-S | 101.5  | 104.8  | 92.3 CLDN17     | <a href="#">NM_012131.1</a> |                                        | structural  | tight       |             |
| GI_6912319-S | 432.6  | 458.8  | 452.4 COPG2     | <a href="#">NM_012133.1</a> | 2-COP;FLJ11781                         | vesicle     |             | nonselecti  |
| GI_6912323-S | 91.2   | 101    | 95.9 LMOD1      | <a href="#">NM_012134.1</a> | 1D;D1;64kD;SM-LMOD                     | tropomyos   | cytoskelet  | pathogene   |
| GI_6912325-S | 108.4  | 97.3   | 105.9 D6S2654E  | <a href="#">NM_012135.1</a> | X5L                                    |             |             |             |
| GI_6912343-S | 213.5  | 198.8  | 196.9 DUX3      | <a href="#">NM_012148.1</a> |                                        |             |             |             |
| GI_6912345-S | 618.7  | 508    | 599.5 FAM16AX   | <a href="#">NM_012080.1</a> | GS1;DXF68S1E                           | molecular   | cellular_co | metabolis   |
| GI_6912347-S | 222.2  | 134    | 148 EDG7        | <a href="#">NM_012152.1</a> | GPCR;Edg-7;LP-A3;HOFNH30;RP4-678I3     | lipid       | integral to | cytosolic   |
| GI_6912355-S | 588.4  | 1563.5 | 1009.2 EML2     | <a href="#">NM_012155.1</a> | ELP70;EMAP2;EMAP-2                     |             | microtubul  | hearing     |
| GI_6912361-S | 112.8  | 140.2  | 122.8 FBXW3     | <a href="#">NM_012165.1</a> | FBW3                                   | ubiquitin-  |             | ubiquitin-  |
| GI_6912371-S | 105.9  | 105.7  | 95.3 FOXD3      | <a href="#">NM_012183.1</a> | HFH2;Genesis                           | transcripti | nucleus     | regulation  |
| GI_6912379-S | 222.9  | 213.7  | 239.4 FUS2      | <a href="#">NM_012191.1</a> | FUS-2                                  | acyltransf  |             | cell growth |
| GI_6912389-S | 335.3  | 437.1  | 376.3 GLG1      | <a href="#">NM_012201.1</a> | CFR-1;ESL-1;MG160;MG-160               | receptor    | Golgi       |             |
| GI_6912393-S | 106.8  | 112    | 99.3 GNG3       | <a href="#">NM_012202.1</a> |                                        | heterotrim  | heterotrim  | activation  |
| GI_6912395-S | 5019.8 | 4672.4 | 4411.4 GRHPR    | <a href="#">NM_012203.1</a> | GLXR                                   | electron    |             | excretion   |
| GI_6912397-S | 470    | 510.8  | 395.1 GTF3C3    | <a href="#">NM_012086.1</a> | TFIIIC102;TFIIICgamma;TFIIC2-102       | RNA         | transcripti | transcripti |
| GI_6912399-S | 437.3  | 449.6  | 409.6 GTF3C4    | <a href="#">NM_012204.1</a> | TFIIIC90;TFIIIC90;TFIIC2-90;TFIICdelta | H3/H4       | transcripti | transcripti |
| GI_6912401-S | 1788.4 | 1864.5 | 1884.2 GTF3C5   | <a href="#">NM_012087.1</a> | TFIIIC63;TFIIC2-63;TFIICepsilon        | RNA         | transcripti | transcripti |
| GI_6912405-S | 318.4  | 405.2  | 358 HAAO        | <a href="#">NM_012205.1</a> | HAO;3-HAO                              | quinolinat  |             |             |
| GI_6912407-S | 104.9  | 116.6  | 108.4 HAVCR1    | <a href="#">NM_012206.1</a> | KIM1;TIM1;HAVCR;KIM-1;TIM-             |             |             |             |
| GI_6912413-S | 101.8  | 132.3  | 94.7 HEY2       | <a href="#">NM_012259.1</a> | GRL;HERP1                              | DNA         |             | histogene   |
| GI_6912417-S | 1608.3 | 1498.5 | 1431.4 HPCL2    | <a href="#">NM_012260.1</a> |                                        | magnesi     | peroxisom   | lipid       |
| GI_6912427-S | 256.9  | 310.8  | 245.7 HYAL4     | <a href="#">NM_012269.1</a> |                                        | hyalurono   |             | glycosami   |
| GI_6912437-S | 113.1  | 110.8  | 102.3 ITGB1BP2  | <a href="#">NM_012278.1</a> | CHORDC3;ITGB1BP;MELUSIN;MSTP015        | protein     | peripheral  | muscle      |
| GI_6912443-S | 106.5  | 98.9   | 88.2 KCNG2      | <a href="#">NM_012283.1</a> | KCNF2;KV6.2                            | delayed     | voltage-    | potassium   |
| GI_6912445-S | 426    | 511.6  | 458.9 KCNH4     | <a href="#">NM_012285.1</a> | BEC2;ELK1;Kv12.3                       | voltage-    | voltage-    | potassium   |
| GI_6912447-S | 2203.6 | 3449.9 | 3166.1 MORF4L2  | <a href="#">NM_012286.1</a> | MRGX;MORFL2;KIAA0026                   | molecular   | nucleus     | regulation  |
| GI_6912449-S | 1204.1 | 1652.4 | 1335.7 TRAM2    | <a href="#">NM_012288.1</a> |                                        |             |             |             |

|              |        |        |        |         |                             |                                     |            |             |            |
|--------------|--------|--------|--------|---------|-----------------------------|-------------------------------------|------------|-------------|------------|
| GI_6912463-S | 493.5  | 476.5  | 802.1  | LPHN2   | <a href="#">NM_012302.1</a> | LEC1;LPHH1;KIAA0786                 |            |             |            |
| GI_6912471-S | 172.4  | 195.6  | 175.5  | KIR2DS2 | <a href="#">NM_012312.1</a> | CL-49;NKAT5;p50.2;CD158J;183ACTI    |            |             |            |
| GI_6912473-S | 89     | 100.7  | 84.8   | KIR2DS3 | <a href="#">NM_012313.1</a> | NKAT7                               | MHC-       | integral to | cellular   |
| GI_6912481-S | 382.7  | 400.9  | 379    | LETM1   | <a href="#">NM_012318.1</a> |                                     | calcium    | integral to | signal     |
| GI_6912487-S | 2241.4 | 2231.3 | 1953.9 | LSM5    | <a href="#">NM_012322.1</a> | YER146W                             | RNA        | small       | mRNA       |
| GI_6912493-S | 2948.9 | 3772.2 | 4957.3 | MAPRE1  | <a href="#">NM_012325.1</a> | EB1                                 | protein C- |             | oncogene   |
| GI_6912497-S | 749.2  | 789.2  | 938.5  | MLYCD   | <a href="#">NM_012213.1</a> | MCD;hMCD                            | methylmal  | peroxisom   | acyl-CoA   |
| GI_6912501-S | 84.7   | 80.5   | 78.6   | MGAT4A  | <a href="#">NM_012214.1</a> | GNT-IV;GnT-Iva                      | alpha-1,3- | membran     | N-glycan   |
| GI_6912505-S | 140    | 140.4  | 127.3  | MIP     | <a href="#">NM_012064.1</a> | AQP0;LIM1;MP26;MIP26                | transporte | gap         | cell-cell  |
| GI_6912507-S | 442.9  | 1406.4 | 1717.7 | MMD     | <a href="#">NM_012329.1</a> | MMA                                 | receptor   | membran     | cytolysis  |
| GI_6912511-S | 149.1  | 148.9  | 141.1  | MYST4   | <a href="#">NM_012330.1</a> | qkf;MORF;MOZ2;KIAA0383;querkopf     | histone    | nucleus     | regulation |
| GI_6912517-S | 681.5  | 626    | 745.2  | ACATE2  | <a href="#">NM_012332.1</a> | CGI-16;MT-ACT48                     | catalytic  | mitochond   | lipid      |
| GI_6912519-S | 870.5  | 606.2  | 673.4  | MUTYH   | <a href="#">NM_012222.1</a> | MYH                                 | endonucle  | nucleus     | mismatch   |
| GI_6912525-S | 251.5  | 193.6  | 213.5  | NESG1   | <a href="#">NM_012337.1</a> |                                     |            | soluble     |            |
| GI_6912531-S | 2721   | 2508   | 2674.6 | GTPBP4  | <a href="#">NM_012341.1</a> | NGB;CRFG;FLJ10686;FLJ10690          | GTP        | nucleus     |            |
| GI_6912533-S | 155.4  | 459.4  | 394    | BAMBI   | <a href="#">NM_012342.1</a> | NMA                                 |            | integral to | oncogene   |
| GI_6912539-S | 3650.5 | 3558.1 | 4160.6 | NUBP2   | <a href="#">NM_012225.1</a> | CFD1                                | nucleotide |             |            |
| GI_6912541-S | 307.8  | 269.8  | 251    | NUFIP1  | <a href="#">NM_012345.1</a> | NUFIP                               | protein    | nucleus     | RNA        |
| GI_6912549-S | 96.6   | 88.7   | 98.7   | OR10J1  | <a href="#">NM_012351.1</a> | HGMP07J;HSHGMP07J                   | G-protein  | integral to | chemosen   |
| GI_6912551-S | 140    | 155.8  | 147.9  | OR1A2   | <a href="#">NM_012352.1</a> | OR17-6                              | olfactory  | integral to | olfaction  |
| GI_6912553-S | 207.1  | 254.3  | 246.3  | OR1F1   | <a href="#">NM_012360.1</a> | OLFMF;OR1F4;OR1F5;OR1F6;OR1F7;OR1   | receptor   | integral to | signal     |
| GI_6912555-S | 159.7  | 178.2  | 160    | OR2C1   | <a href="#">NM_012368.1</a> | OLFmf3;OR2C2P                       | olfactory  | integral to | perception |
| GI_6912557-S | 373.6  | 436.5  | 416.4  | OR2F1   | <a href="#">NM_012369.1</a> | OLF3;OR2F3;OR2F4;OR2F5;OR2F3P;OR14- | receptor   | integral to | signal     |
| GI_6912559-S | 329.9  | 454.1  | 394    | OR52A1  | <a href="#">NM_012375.1</a> | HPFH1OR                             | transmem   | integral to | olfaction  |
| GI_6912569-S | 392.9  | 406.5  | 97.9   | P8      | <a href="#">NM_012385.1</a> | COM1                                | molecular  | nucleus     | induction  |
| GI_6912575-S | 134.8  | 275.7  | 195.1  | PADI4   | <a href="#">NM_012387.1</a> | PAD;PDI4;PDI5;PADI5                 | protein-   |             | protein    |
| GI_6912577-S | 331.9  | 380.1  | 321.8  | PROL5   | <a href="#">NM_012390.1</a> | PBI;P-B1;PRL5                       |            | extracellul |            |
| GI_6912579-S | 98.3   | 100.5  | 91.7   | SPDEF   | <a href="#">NM_012391.1</a> | PDEF;bA375E1.3                      | protein    | nucleus     | developm   |
| GI_6912581-S | 840.5  | 1017.9 | 1044.3 | PEF     | <a href="#">NM_012392.1</a> | PEFLIN                              | calcium    |             |            |
| GI_6912587-S | 1275.7 | 988.6  | 1006   | PGPL    | <a href="#">NM_012227.1</a> |                                     | GTP        |             |            |
| GI_6912589-S | 765.3  | 788.3  | 802.7  | PHLDA3  | <a href="#">NM_012396.1</a> | TIH1                                |            |             | embryoge   |
| GI_6912603-S | 122    | 142.6  | 115.4  | ANP32C  | <a href="#">NM_012403.1</a> | PP32R1                              |            |             | oncogene   |
| GI_6912611-A | 318.7  | 381.7  | 424.2  | PSK-1   | <a href="#">NM_012410.1</a> |                                     |            |             |            |
| GI_6912625-S | 115.9  | 121.1  | 110.2  | FSCN2   | <a href="#">NM_012418.1</a> | RFSN;RP30                           | actin      | actin       | vision     |
| GI_6912629-S | 237.5  | 206.4  | 185.3  | IFIT5   | <a href="#">NM_012420.1</a> | RI58                                | molecular  | cellular_co | immune     |
| GI_6912631-S | 449.9  | 565.7  | 378.1  | RLF     | <a href="#">NM_012421.1</a> |                                     | zinc ion   | nucleus     | regulation |
| GI_6912641-S | 371.3  | 349.6  | 320    | SCMH1   | <a href="#">NM_012236.1</a> | Scml3                               | DNA        |             | embryoge   |
| GI_6912645-I | 140.8  | 160.8  | 154.3  | SDFR1   | <a href="#">NM_012428.1</a> | GP55;GP65                           |            |             |            |
| GI_6912649-S | 302.9  | 364.7  | 363.6  | SEMA3E  | <a href="#">NM_012431.1</a> |                                     |            |             |            |
| GI_6912653-S | 1189.2 | 1802.6 | 1594.8 | SF3B1   | <a href="#">NM_012433.1</a> | PRP10;SAP155;SF3B155                | pre-mRNA   | spliceoso   | mRNA       |
| GI_6912661-S | 128.3  | 154.1  | 152.3  | SIRT4   | <a href="#">NM_012240.1</a> | SIR2L4                              | NAD ADP-   | chromatin   | chromatin  |
| GI_6912667-S | 322.3  | 333.2  | 342.6  | SLC35A3 | <a href="#">NM_012243.1</a> |                                     | UDP-N-     | Golgi       | UDP-N-     |
| GI_6912681-S | 90     | 88     | 75.3   | SPON2   | <a href="#">NM_012445.1</a> | DIL1;DIL-1;Mindin;M-spondin         | structural | extracellul | axon       |
| GI_6912685-I | 138.8  | 178.6  | 149.1  | STAG3   | <a href="#">NM_012447.1</a> | MGC2463                             |            | synaptone   | synaptone  |

|              |         |        |        |           |                             |                                   |             |             |             |
|--------------|---------|--------|--------|-----------|-----------------------------|-----------------------------------|-------------|-------------|-------------|
| GI_6912695-S | 164.2   | 207.5  | 176.8  | ARHQ      | <a href="#">NM_012249.1</a> | TC10;TC10A;RASL7A                 | Rho small   | plasma      | small       |
| GI_6912699-A | 431.9   | 380.6  | 382.5  | TFAM      | <a href="#">NM_012251.1</a> | TCF6;MtTF1;mtTFA;TCF6L2           | transcripti | mitochond   | transcripti |
| GI_6912701-S | 163.9   | 189.3  | 188.9  | TFEC      | <a href="#">NM_012252.1</a> | TCFEC;TFECL                       | transcripti | nucleus     |             |
| GI_6912705-S | 158.8   | 250.5  | 126.1  | TIC       | <a href="#">NM_012455.1</a> | EFA6B                             |             |             |             |
| GI_6912707-S | 1446    | 1267.1 | 1348.9 | TIMM10    | <a href="#">NM_012456.1</a> | TIM10;TIM10A                      | zinc ion    | mitochond   | mitochond   |
| GI_6912711-S | 2160.2  | 3845.7 | 3070   | TIMM8B    | <a href="#">NM_012459.1</a> | DDP2;TIM8B                        | zinc ion    | mitochond   | mitochond   |
| GI_6912715-S | 1390    | 1274.7 | 1494.9 | TINF2     | <a href="#">NM_012461.1</a> | TIN2                              | protein     | telomere    | telomeras   |
| GI_6912727-S | 196.3   | 247.1  | 221.3  | TPSG1     | <a href="#">NM_012467.1</a> | TMT;PRSS31                        | serine-     | integral to | proteolysis |
| GI_6912735-S | 129.1   | 165.3  | 144.7  | TRPC5     | <a href="#">NM_012471.1</a> | TRP5                              | store-      | integral to | calcium     |
| GI_6912747-S | 90.2    | 95.9   | 97.4   | ZNF73     | <a href="#">NM_012480.1</a> |                                   |             |             |             |
| GI_6981363-S | 378.5   | 490.5  | 400.2  | PLA2G6    | <a href="#">NM_003560.1</a> | iPLA2                             | phospholi   | membran     | phospholi   |
| GI_6995993-I | 113.7   | 111.3  | 111.3  | AGC1      | <a href="#">NM_013227.1</a> | CSPG1;MSK16;CSPGCP                | chondroiti  | extracellul | heterophili |
| GI_6995995-S | 106.7   | 116    | 113.1  | CFTR      | <a href="#">NM_000492.2</a> | CF;MRP7;ABC35;ABCC7               | ATP-        | membran     | respiratory |
| GI_6995997-S | 7521.4  | 8877.5 | 7539.4 | ARF1      | <a href="#">NM_001658.2</a> |                                   | GTPase      | Golgi       | small       |
| GI_6995998-S | 4210.6  | 5305   | 4126.5 | ARF4      | <a href="#">NM_001660.2</a> |                                   | ARF small   | Golgi       | small       |
| GI_6995999-S | 626.4   | 715.4  | 757.5  | ARF5      | <a href="#">NM_001662.2</a> |                                   | ARF small   | Golgi       | small       |
| GI_6996000-S | 137.1   | 148.1  | 130.6  | ARF6      | <a href="#">NM_001663.2</a> |                                   | ARF small   | Golgi       | nonselecti  |
| GI_6996001-S | 198.9   | 260.7  | 225.9  | CA3       | <a href="#">NM_005181.2</a> | CAIII                             | carbonate   | cytoplasm   | one-        |
| GI_6996002-S | 4384.6  | 5396.5 | 3960.9 | COPA      | <a href="#">NM_004371.2</a> | HEP-COP                           | vesicle     | coated      | ER to       |
| GI_6996003-S | 303.8   | 234.3  | 292.6  | DLX2      | <a href="#">NM_004405.2</a> | TES1;TES-1                        | transcripti | nucleus     | brain       |
| GI_6996006-A | 265.6   | 350.1  | 325.6  | DNM1L     | <a href="#">NM_012063.1</a> | DLP1;DRP1;DVLP;VPS1;DYMPLE;HDYNIV | GTPase      | Golgi cis-  | mitochond   |
| GI_6996009-S | 21952.4 | 18465  | 14004  | GARS      | <a href="#">NM_002047.1</a> | CMT2D;SMAD1                       | glycine-    | soluble     | protein     |
| GI_6996012-S | 159.8   | 110.9  | 97.7   | GZMA      | <a href="#">NM_006144.2</a> | HFSP;CTLA3                        | granzyme    |             | immune      |
| GI_6996015-A | 123.5   | 122.8  | 109.5  | LTB       | <a href="#">NM_009588.1</a> | p33;TNFC;TNFSF3                   | receptor    | integral to | signal      |
| GI_6996017-S | 397.2   | 357.4  | 230.1  | MSC       | <a href="#">NM_005098.2</a> | ABF1;MYOR;ABF-1                   | transcripti | nucleus     | transcripti |
| GI_6996020-S | 160.8   | 200.1  | 173.1  | CYBB      | <a href="#">NM_000397.2</a> | CGD;NOX2;GP91-1;GP91PHOX;GP91-    | cytochrom   | integral to | energy      |
| GI_6996927-S | 1132.6  | 1464.8 | 1375.6 | MORF4     | <a href="#">NM_006792.2</a> | CSR;SEN;CSRB;SEN1                 | transcripti | nucleus     | aging       |
| GI_6997248-S | 205.8   | 243.7  | 243    | SALL1     | <a href="#">NM_002968.1</a> | TBS;HSAL1                         | DNA         | nucleus     | embryoge    |
| GI_7019332-S | 333.4   | 393.1  | 526.3  | NRBP      | <a href="#">NM_013392.1</a> | MADM;BCON3;MUDPNP                 | SH3/SH2     | nucleus     | signal      |
| GI_7019334-S | 352.3   | 369.7  | 189.2  | C11orf9   | <a href="#">NM_013279.1</a> | KIAA0954;MGC10781                 |             |             |             |
| GI_7019336-S | 398.6   | 306.1  | 304.3  | C16orf5   | <a href="#">NM_013399.1</a> |                                   | molecular   | nucleus     | biological_ |
| GI_7019340-S | 745     | 946.5  | 1457.3 | CARKL     | <a href="#">NM_013276.1</a> |                                   | kinase      |             | carbohydr   |
| GI_7019342-S | 119.6   | 173.3  | 347    | CD24      | <a href="#">NM_013230.1</a> | CD24A                             |             | plasma      | humoral     |
| GI_7019356-A | 148.1   | 139.4  | 121.2  | CRYBA2    | <a href="#">NM_005209.1</a> |                                   | structural  | cellular_co | biological_ |
| GI_7019370-S | 514.9   | 496.9  | 517.6  | TFPT      | <a href="#">NM_013342.1</a> | FB1;amida                         | nuclear     | nucleus     | induction   |
| GI_7019372-S | 3007    | 2386.8 | 2151.5 | FEZ2      | <a href="#">NM_005102.1</a> | HUM3CL                            | cell        |             | axon        |
| GI_7019374-S | 561.7   | 774.5  | 676.3  | FHOD1     | <a href="#">NM_013241.1</a> | FHOS                              | actin       | kinesin     | cytokinesi  |
| GI_7019404-S | 153.1   | 181.2  | 133    | HCF-2     | <a href="#">NM_013320.1</a> | HCF2                              | RNA         | membran     | viral life  |
| GI_7019408-S | 477.8   | 446.5  | 354.1  | HIG2      | <a href="#">NM_013332.1</a> |                                   | molecular   | integral to | response    |
| GI_7019410-S | 237.7   | 297.8  | 285.3  | HOOK2     | <a href="#">NM_013312.1</a> | HK2                               |             |             | endocytosi  |
| GI_7019418-S | 2979.5  | 2633.8 | 2708.9 | HUMAUANTI | <a href="#">NM_013285.1</a> |                                   | GTPase      | nucleus     | biological_ |
| GI_7019440-S | 188     | 254.6  | 209.1  | KIR3DL1   | <a href="#">NM_013289.1</a> | KIR;CL-2;NKB1;AMB11;CL-           |             |             |             |
| GI_7019446-S | 116.4   | 124.5  | 91.5   | LLT1      | <a href="#">NM_013269.1</a> |                                   | transmem    | membran     | cell        |
| GI_7019450-S | 111.9   | 125    | 113.7  | PNMA3     | <a href="#">NM_013364.1</a> | MA3;MA5                           | nucleic     |             |             |



|              |        |        |        |          |                             |                                   |             |              |              |
|--------------|--------|--------|--------|----------|-----------------------------|-----------------------------------|-------------|--------------|--------------|
| GI_7019452-S | 1719.9 | 2125.9 | 1485.2 | DNAJD1   | <a href="#">NM_013238.1</a> | MCJ                               |             |              |              |
| GI_7019466-S | 582.6  | 619.6  | 562.8  | CNOT4    | <a href="#">NM_013316.1</a> | NOT4;NOT4H;CLONE243               |             |              |              |
| GI_7019468-S | 93.2   | 90.3   | 96.3   | NPC1L1   | <a href="#">NM_013389.1</a> |                                   | hedgehog    | integral to  | sterol       |
| GI_7019492-S | 269.7  | 294.7  | 267.6  | POLM     | <a href="#">NM_013284.1</a> | Tdt-N;POL-IOTA;Pol iota           | eta DNA     | intracellula | DNA          |
| GI_7019510-S | 975    | 782.6  | 905.4  | DPP7     | <a href="#">NM_013379.1</a> | QPP;DPP2;DPPII                    | serine-     | lysosome     | proteolysis  |
| GI_7019520-S | 2424.8 | 2328.8 | 1699.1 | SART2    | <a href="#">NM_013352.1</a> |                                   | tumor       | endoplas     |              |
| GI_7019524-S | 367.8  | 446.3  | 512.1  | SERTAD1  | <a href="#">NM_013376.1</a> | SEI1;TRIP-Br1                     |             |              | regulation   |
| GI_7019528-S | 114.2  | 116.5  | 104.4  | SLC16A8  | <a href="#">NM_013356.1</a> | MCT3                              | lactate     | membran      | lactate      |
| GI_7019542-S | 1687.1 | 941.1  | 1156.8 | STK39    | <a href="#">NM_013233.1</a> | DCHT;SPAK                         | protein-    | cytoplasm    | response     |
| GI_7019548-S | 109.3  | 135.3  | 124    | TBX21    | <a href="#">NM_013351.1</a> | T-PET;T-bet;TBLYM                 | transcripti | nucleus      | regulation   |
| GI_7019550-S | 1059.1 | 745.5  | 919.2  | TERE1    | <a href="#">NM_013319.1</a> |                                   |             | membran      |              |
| GI_7019552-S | 1445.7 | 1408.9 | 1288   | TIMM22   | <a href="#">NM_013337.1</a> | TEX4;TIM22                        | protein     | mitochond    | intracellula |
| GI_7019554-S | 272.8  | 424.1  | 496.5  | TMEM2    | <a href="#">NM_013390.1</a> |                                   |             | integral to  |              |
| GI_7019556-S | 144.2  | 165.2  | 152.5  | TMOD4    | <a href="#">NM_013353.1</a> | Sk-Tmod                           | tropomyos   | F-actin      | muscle       |
| GI_7019560-S | 185.8  | 174.4  | 188.6  | TRHDE    | <a href="#">NM_013381.1</a> | PAP-II                            | aminopept   | integral to  | sterol       |
| GI_7019566-S | 110.7  | 123    | 101.4  | VPREB3   | <a href="#">NM_013378.1</a> | 8HS20                             |             | endoplas     |              |
| GI_7019570-S | 96.8   | 102.2  | 98.3   | CTNNA3   | <a href="#">NM_013266.1</a> | VR22;MGC26194                     |             |              |              |
| GI_7019572-S | 1308.9 | 1191.2 | 1121.6 | STRN4    | <a href="#">NM_013403.1</a> | ZIN;zinedin                       | structural  | kinesin      | synaptic     |
| GI_7019576-S | 171.5  | 202.3  | 171.7  | TAC3     | <a href="#">NM_013251.1</a> | NKB;NKNB;ZNEUROK1                 | tachykinin  | soluble      | tachykinin   |
| GI_7019578-S | 395.5  | 432.8  | 377.2  | ZNF180   | <a href="#">NM_013256.1</a> | HHZ168                            | DNA         | nucleus      | regulation   |
| GI_7019580-S | 82.7   | 96.3   | 80.1   | ZNF214   | <a href="#">NM_013249.1</a> | BAZ1                              | zinc ion    | nucleus      | regulation   |
| GI_7019582-S | 89.2   | 85.4   | 86.5   | ZNF215   | <a href="#">NM_013250.1</a> | BAZ2                              |             |              |              |
| GI_7019584-S | 123.4  | 148.5  | 133.3  | ZNF221   | <a href="#">NM_013359.1</a> |                                   | DNA         | nucleus      | regulation   |
| GI_7019586-S | 240.3  | 203    | 181.4  | ZNF222   | <a href="#">NM_013360.1</a> |                                   | DNA         | nucleus      | regulation   |
| GI_7019590-S | 95.1   | 111.4  | 91.4   | ZNF224   | <a href="#">NM_013398.1</a> | BMZF2;ZNF255                      | DNA         | nucleus      | regulation   |
| GI_7019592-S | 130.1  | 151.9  | 124.9  | ZNF225   | <a href="#">NM_013362.1</a> |                                   | DNA         | nucleus      | regulation   |
| GI_7106298-S | 1487.5 | 1677.4 | 1423.2 | E46L     | <a href="#">NM_013236.1</a> | DKFZP586H2219                     | molecular   | cellular_co  | biological_  |
| GI_7106370-S | 110.7  | 129.3  | 114    | LOH3CR2A | <a href="#">NM_013343.1</a> | NAG7;NAG-7                        |             |              |              |
| GI_7108334-S | 330.1  | 325.2  | 301.6  | CBR3     | <a href="#">NM_001236.2</a> |                                   | carbonyl    | cytosol      | metabolis    |
| GI_7108339-A | 1422   | 1505.3 | 1573.6 | DHPS     | <a href="#">NM_013407.1</a> |                                   | deoxyhyphu  |              | positive     |
| GI_7108341-I | 1548   | 1626.4 | 1742.5 | DHPS     | <a href="#">NM_001930.2</a> |                                   | deoxyhyphu  |              | positive     |
| GI_7108342-S | 573.3  | 1103   | 1431.1 | DUSP1    | <a href="#">NM_004417.2</a> | HVH1;CL100;MKP-1;PTPN10           | non-        |              | response     |
| GI_7108343-A | 248.9  | 315.3  | 266.5  | GNLY     | <a href="#">NM_006433.2</a> | 519;LAG2;NKG5;LAG-2;D2S69E;TLA519 | antifungal  | extracellul  | cellular     |
| GI_7108343-I | 118.3  | 126    | 124.6  | GNLY     | <a href="#">NM_006433.2</a> | 519;LAG2;NKG5;LAG-2;D2S69E;TLA519 | antifungal  | extracellul  | cellular     |
| GI_7108345-I | 124.2  | 117.9  | 113.7  | GNLY     | <a href="#">NM_012483.1</a> | 519;LAG2;NKG5;LAG-2;D2S69E;TLA519 | antifungal  | extracellul  | cellular     |
| GI_7108347-S | 127.8  | 143.4  | 137.7  | GZMM     | <a href="#">NM_005317.2</a> | MET1;LMET1                        | serine-     |              | proteolysis  |
| GI_7108350-A | 382.3  | 420.4  | 400.9  | HMMR     | <a href="#">NM_012485.1</a> | RHAMM                             | hyaluronic  |              | oncogene     |
| GI_7108353-S | 162.1  | 161.2  | 181    | KLRC2    | <a href="#">NM_002260.2</a> | NKG2C;NKG2-C                      | transmem    | integral to  | cellular     |
| GI_7108354-S | 2084.6 | 1256.2 | 1567.7 | LMO4     | <a href="#">NM_006769.2</a> |                                   | transcripti | nucleus      | embryoge     |
| GI_7108357-A | 134.4  | 175    | 146.7  | MSLN     | <a href="#">NM_005823.2</a> | MPF;SMR;CAK1                      |             |              |              |
| GI_7108359-A | 822.4  | 780    | 1087.5 | PSEN2    | <a href="#">NM_012486.1</a> | AD4;PS2;AD3L;STM2                 |             | integral to  | apoptotic    |
| GI_7108361-A | 150.6  | 184.5  | 144.3  | SIM2     | <a href="#">NM_009586.1</a> | SIM                               | DNA         | nucleus      | embryoge     |
| GI_7108361-I | 79.1   | 96     | 93.1   | SIM2     | <a href="#">NM_009586.1</a> | SIM                               | DNA         | nucleus      | embryoge     |
| GI_7108363-I | 173.7  | 222.9  | 184.9  | SIM2     | <a href="#">NM_005069.2</a> | SIM                               | DNA         | nucleus      | embryoge     |

|              |         |        |        |          |                             |                                   |             |             |             |
|--------------|---------|--------|--------|----------|-----------------------------|-----------------------------------|-------------|-------------|-------------|
| GI_7108366-S | 112.3   | 102.2  | 103.3  | VAV1     | <a href="#">NM_005428.2</a> | VAV                               | transcripti | nucleus     | oncogene    |
| GI_7110592-S | 434.2   | 445.5  | 219.2  | FLI1     | <a href="#">NM_002017.2</a> | EWSR2;SIC-1                       | DNA         | nucleus     | hemostasi   |
| GI_7110640-S | 378.1   | 466.4  | 411.6  | PLD3     | <a href="#">NM_012268.1</a> | HU-K4                             | phospholi   |             | virulence   |
| GI_7110678-S | 139.1   | 163.3  | 191.4  | OSRF     | <a href="#">NM_012382.1</a> |                                   |             |             |             |
| GI_7110696-S | 1422.1  | 1900.2 | 1616.1 | PRKCABP  | <a href="#">NM_012407.1</a> | PICK1;dJ1039K5                    | protein C-  | presynapti  | ion         |
| GI_7110714-S | 260.6   | 314.1  | 303.8  | SEC14L2  | <a href="#">NM_012429.1</a> | SPF;TAP;C22orf6;KIAA1186;KIAA1658 | tocopherol  | cytoplasm   | transport   |
| GI_7110718-S | 132.3   | 147.3  | 123.1  | DKK1     | <a href="#">NM_012242.1</a> | SK;DKK-1                          | growth      |             | developm    |
| GI_7110726-S | 112.4   | 111    | 115    | TKTL1    | <a href="#">NM_012253.1</a> | TKR;TKT2                          | transketol  |             | thiamin     |
| GI_7110734-S | 100.5   | 129    | 114.4  | VAX2     | <a href="#">NM_012476.1</a> | DRES93                            | transcripti | nucleus     | ectoderm    |
| GI_7242166-S | 99.6    | 107.6  | 90.4   | PAX9     | <a href="#">NM_006194.1</a> |                                   | DNA         | nucleus     | regulation  |
| GI_7242221-A | 591.2   | 1196.8 | 308.7  | FST      | <a href="#">NM_013409.1</a> | FS                                | activin     | extracellul | developm    |
| GI_7242223-I | 103.3   | 150.5  | 93.3   | FST      | <a href="#">NM_006350.2</a> | FS                                | activin     | extracellul | developm    |
| GI_7262293-S | 176     | 223.9  | 183    | ARSA     | <a href="#">NM_000487.3</a> | MLD                               | arylsulfata | lysosome    | sphingolipi |
| GI_7262372-S | 135.2   | 270.2  | 142.3  | BST2     | <a href="#">NM_004335.2</a> |                                   |             | integral to | humoral     |
| GI_7262376-S | 295.4   | 310.8  | 354.3  | DHFR     | <a href="#">NM_000791.2</a> |                                   | dihydrofol  | cellular_co | glycine     |
| GI_7262380-S | 371.5   | 547.6  | 526.3  | SERPIND1 | <a href="#">NM_000185.2</a> | HC2;LS2;HCF2;HLS2;HC-II;D22S673   | endopepti   |             | chemotaxi   |
| GI_7262382-I | 174.8   | 219.3  | 188    | KLRC1    | <a href="#">NM_002259.2</a> | NKG2;NKG2A;CD159A;NKG2-A;NKG2-B   | transmem    | integral to | cell        |
| GI_7262383-A | 107.7   | 121.4  | 112    | KLRC1    | <a href="#">NM_007328.1</a> | NKG2;NKG2A;CD159A;NKG2-A;NKG2-B   | transmem    | integral to | cell        |
| GI_7262385-A | 123.4   | 121.2  | 126.8  | KLRC3    | <a href="#">NM_007333.1</a> | NKG2E;NKG2-E                      | transmem    | integral to | cellular    |
| GI_7262385-I | 72.8    | 81.5   | 95     | KLRC3    | <a href="#">NM_007333.1</a> | NKG2E;NKG2-E                      | transmem    | integral to | cellular    |
| GI_7262387-S | 10663.3 | 9250.6 | 7845.3 | NARS     | <a href="#">NM_004539.2</a> | ASNRS                             | asparagin   | soluble     | protein     |
| GI_7262388-S | 765.3   | 3450.5 | 192    | PCOLCE   | <a href="#">NM_002593.2</a> | PCPE                              | collagen    |             | cell growth |
| GI_7262389-S | 124.7   | 115.3  | 116.4  | RHO      | <a href="#">NM_000539.2</a> | RP4;OPN2                          | G-protein   | integral to | rhodopsin   |
| GI_7262392-S | 117.4   | 157.6  | 122.3  | ABCD1    | <a href="#">NM_000033.2</a> | ALD;AMN;ALDP;ABC42                | nucleotide  | integral to | peroxisom   |
| GI_7304922-S | 237.9   | 309.2  | 268.3  | BAZ2B    | <a href="#">NM_013450.1</a> | DKFZP434H071                      | DNA         | kinesin     | regulation  |
| GI_7305204-S | 373.7   | 398.9  | 468.1  | KIF4A    | <a href="#">NM_012310.2</a> | KIF4;KIF4-G1;HSA271784            | microtubul  | spindle     | anterogra   |
| GI_7305450-S | 86.3    | 98.3   | 89.3   | RAX      | <a href="#">NM_013435.1</a> | RX                                | RNA         | nucleus     | vision      |
| GI_7305502-S | 2370.9  | 1920.9 | 1559.1 | STOML2   | <a href="#">NM_013442.1</a> | SLP-2;HSPC108                     | receptor    | peripheral  |             |
| GI_7305624-S | 756.1   | 192    | 640.3  | VCX      | <a href="#">NM_013452.1</a> | VCX-B1;VCX10R;VCX-10r             |             |             | spermatog   |
| GI_7330334-S | 4396.4  | 4691.5 | 3216.2 | CLIC4    | <a href="#">NM_013943.1</a> | H1;huH1;P64H1;CLIC4L;DKFZP566G223 | chloride    | membran     | chloride    |
| GI_7330336-S | 114.1   | 119    | 110.8  | OR10H2   | <a href="#">NM_013939.1</a> |                                   | olfactory   | integral to | olfaction   |
| GI_7330338-S | 89.2    | 95.2   | 81     | OR10H3   | <a href="#">NM_013938.1</a> |                                   | olfactory   | integral to | olfaction   |
| GI_7363438-S | 95.9    | 100.5  | 85.9   | OR10H1   | <a href="#">NM_013940.1</a> |                                   | olfactory   | integral to | olfaction   |
| GI_7382453-S | 112.5   | 118.1  | 122.8  | CHRNA3   | <a href="#">NM_005199.3</a> | ACHRG                             | muscarini   | integral to | small       |
| GI_7382457-S | 195.4   | 241.5  | 210.6  | PRTN3    | <a href="#">NM_002777.2</a> | MBT;P29;ACPA;AGP7;PR-3            | serine-     | cellular_co | positive    |
| GI_7382459-S | 180.9   | 206.5  | 193.5  | SHBG     | <a href="#">NM_001040.2</a> | ABP                               | androgen    |             |             |
| GI_7382475-S | 577.6   | 701.1  | 465.7  | ADAT1    | <a href="#">NM_012091.2</a> | HADAT1                            | tRNA        |             | tRNA        |
| GI_7382476-I | 133.7   | 136.9  | 137    | ARHGAP6  | <a href="#">NM_001174.2</a> | RHOGAP6                           | SH3/SH2     | actin       | Rho         |
| GI_7382477-A | 98.5    | 109.9  | 104.5  | ARHGAP6  | <a href="#">NM_013422.1</a> | RHOGAP6                           | SH3/SH2     | actin       | Rho         |
| GI_7382479-I | 116.9   | 126.2  | 116.9  | ARHGAP6  | <a href="#">NM_013423.1</a> | RHOGAP6                           | SH3/SH2     | actin       | Rho         |
| GI_7382485-S | 505.3   | 691.9  | 587.7  | CCNC     | <a href="#">NM_005190.2</a> |                                   | cyclin-     | nucleus     | regulation  |
| GI_7382489-S | 438.3   | 500.3  | 437.7  | DGAT1    | <a href="#">NM_012079.2</a> | DGAT;ARGP1                        | diacylglyc  | endoplas    | triacylglyc |
| GI_7382490-S | 4423.7  | 1027.7 | 1111   | LCP1     | <a href="#">NM_002298.2</a> | CP64;PLS2;LC64P;L-PLASTIN         | actin       | cytosol     | biological_ |
| GI_7382491-S | 79.3    | 81.2   | 80.5   | LCP2     | <a href="#">NM_005565.2</a> | SLP76;SLP-76                      | protein     |             | transmem    |

|              |        |        |        |          |                             |                                   |             |              |              |
|--------------|--------|--------|--------|----------|-----------------------------|-----------------------------------|-------------|--------------|--------------|
| GI_7382492-I | 459.7  | 558.4  | 493.1  | NCF4     | <a href="#">NM_013416.1</a> | NCF;P40PHOX                       | electron    | cytosol      | defense      |
| GI_7382494-A | 100.5  | 94.3   | 92.2   | NCF4     | <a href="#">NM_000631.2</a> | NCF;P40PHOX                       | electron    | cytosol      | defense      |
| GI_7382494-I | 139.6  | 155.5  | 121    | NCF4     | <a href="#">NM_000631.2</a> | NCF;P40PHOX                       | electron    | cytosol      | defense      |
| GI_7382497-S | 554.6  | 544.3  | 535.2  | PAK4     | <a href="#">NM_005884.2</a> |                                   | protein     | Golgi        | cell         |
| GI_7427516-S | 112.9  | 114.1  | 105.1  | HSPG2    | <a href="#">NM_005529.2</a> | PLC;SJA;SJS;SJS1                  | heparin     | basement     |              |
| GI_7524013-S | 108.2  | 104.3  | 86     | PSG6     | <a href="#">NM_002782.3</a> | PSG10                             | plasma      | extracellul  | pregnancy    |
| GI_7524347-A | 307.6  | 225    | 204    | BNIP1    | <a href="#">NM_013978.1</a> | NIP1                              | apoptosis   | integral to  | anti-        |
| GI_7524353-S | 481    | 501    | 451.3  | DDAH2    | <a href="#">NM_013974.1</a> | G6a;NG30;DDAHII                   | catalytic   |              | nitric oxide |
| GI_7524358-A | 779.1  | 965.5  | 854.4  | PAX7     | <a href="#">NM_013945.1</a> | HUP1                              | transcripti | nucleus      | anti-        |
| GI_7549792-A | 1152.9 | 1054.3 | 1027.2 | TBL2     | <a href="#">NM_012453.1</a> | WBSCR13;WS-betaTRP;DKFZP43N024    | molecular   | cellular_co  | biological_  |
| GI_7549801-S | 1343.3 | 1979.2 | 2039.8 | BAG1     | <a href="#">NM_004323.2</a> |                                   | apoptosis   | cytoplasm    | anti-        |
| GI_7549802-I | 89.9   | 92.1   | 100.4  | DIO2     | <a href="#">NM_013989.1</a> | SeIY;TXDI2                        | selenium    | integral to  | thyroid      |
| GI_7549804-A | 105.7  | 114.7  | 112.4  | DIO2     | <a href="#">NM_000793.2</a> | SeIY;TXDI2                        | selenium    | integral to  | thyroid      |
| GI_7549806-S | 458    | 553.6  | 481.4  | FBXW2    | <a href="#">NM_012164.2</a> | FBW2                              | ubiquitin   |              | proteolysis  |
| GI_7549807-S | 2480.7 | 2312.6 | 1593.6 | DNAJA2   | <a href="#">NM_005880.2</a> | CPR3;DNAJ;DNJ3;HIRIP4;PRO3015     |             |              | positive     |
| GI_7549810-S | 97.8   | 120.7  | 117    | PPARA    | <a href="#">NM_005036.2</a> | PPAR;NR1C1;hPPAR                  | peroxisom   | nucleus      | fatty acid   |
| GI_7549812-I | 100.4  | 88.8   | 90.9   | PSEN1    | <a href="#">NM_007318.1</a> | AD3;FAD;PS1;S182                  |             | integral to  | chromoso     |
| GI_7549814-A | 476    | 597.4  | 489.5  | PSEN1    | <a href="#">NM_007319.1</a> | AD3;FAD;PS1;S182                  |             | integral to  | chromoso     |
| GI_7549814-I | 140    | 184.2  | 157.8  | PSEN1    | <a href="#">NM_007319.1</a> | AD3;FAD;PS1;S182                  |             | integral to  | chromoso     |
| GI_7549816-I | 212.2  | 240.5  | 203.4  | RABL2A   | <a href="#">NM_013412.1</a> |                                   | RAB small   |              | small        |
| GI_7549818-A | 563.4  | 470.4  | 379.2  | RABL2A   | <a href="#">NM_007082.2</a> |                                   | RAB small   |              | small        |
| GI_7656842-A | 745.8  | 1505.1 | 608.8  | GRCA     | <a href="#">NM_014449.1</a> |                                   |             |              |              |
| GI_7656848-S | 427.2  | 511.9  | 557.5  | ACAD8    | <a href="#">NM_014384.1</a> | ACAD-8                            | acyl-CoA    | mitochond    | lipid        |
| GI_7656858-S | 123.1  | 124.8  | 121.5  | AD7C-NTP | <a href="#">NM_014486.1</a> |                                   |             | integral to  | central      |
| GI_7656860-S | 152.2  | 159.6  | 142.6  | ADAM18   | <a href="#">NM_014237.1</a> | ADAM27;tMDCIII                    | metallope   | integral to  | spermatog    |
| GI_7656862-I | 83.7   | 85.4   | 76.3   | ADAM28   | <a href="#">NM_014265.1</a> | MDCL;ADAM23;MDC-Lm;MDC-Ls;eMDCII  | metallope   | integral to  | spermatog    |
| GI_7656866-I | 116.3  | 109.8  | 134.2  | ADAMTS2  | <a href="#">NM_014244.1</a> | NPI;PCINP;PCPNI;hPCPNI;ADAM-      | collagenas  | extracellul  | collagen     |
| GI_7656870-S | 1057.9 | 840    | 779.2  | ZNF544   | <a href="#">NM_014480.1</a> |                                   | nucleic     | nucleus      | regulation   |
| GI_7656878-S | 112.3  | 138.1  | 117.1  | AF5Q31   | <a href="#">NM_014423.1</a> | MCEF                              | transcripti |              | oncogene     |
| GI_7656882-S | 642.8  | 402.8  | 136.5  | PDLIM3   | <a href="#">NM_014476.1</a> | ALP                               |             |              |              |
| GI_7656889-A | 1445.7 | 1422.4 | 1134   | REPIN1   | <a href="#">NM_014374.1</a> | AP4;RIP60;ZNF464;Zfp464           | DNA         | nuclear      | DNA          |
| GI_7656889-I | 119.5  | 130.4  | 122.2  | REPIN1   | <a href="#">NM_014374.1</a> | AP4;RIP60;ZNF464;Zfp464           | DNA         | nuclear      | DNA          |
| GI_7656907-S | 125.7  | 116.8  | 91.9   | ASML3B   | <a href="#">NM_014474.1</a> |                                   |             |              |              |
| GI_7656909-S | 2250.1 | 3088.7 | 2294.2 | ATP2C1   | <a href="#">NM_014382.1</a> | HHD;BCPM;PMR1;SPCA1;hSPCA1;ATP2C1 | adenosine   | integral to  | epidermal    |
| GI_7656927-S | 134.8  | 129.4  | 112.8  | BMP10    | <a href="#">NM_014482.1</a> |                                   | cytokine    | extracellul  | cell growth  |
| GI_7656933-S | 2495.5 | 2393.3 | 1953.3 | C11orf10 | <a href="#">NM_014206.1</a> |                                   |             |              |              |
| GI_7656945-S | 1367.7 | 1449.8 | 1147.4 | SLC30A9  | <a href="#">NM_006345.2</a> | HUEL;ZNT9;C4orf1                  | cation      | membran      | cation       |
| GI_7656949-I | 93.5   | 100.1  | 102.4  | CACNG5   | <a href="#">NM_014404.1</a> |                                   | ion         | membran      | small        |
| GI_7656951-S | 121.9  | 123.2  | 119.3  | SIP      | <a href="#">NM_014412.1</a> | CACYBP                            | cyclin-     |              |              |
| GI_7656966-S | 186.2  | 251.3  | 213.8  | CELSR1   | <a href="#">NM_014246.1</a> | ME2;FMI2;CDHF9;HFMI2              | transmem    | integral to  | central      |
| GI_7656970-S | 677.4  | 557.8  | 655.2  | PFAAP5   | <a href="#">NM_014887.1</a> | CG005                             | molecular   | cellular_co  | biological_  |
| GI_7656974-S | 1924.7 | 1706.7 | 1867.8 | CXXC1    | <a href="#">NM_014593.1</a> | CGBP;PCCX1;PHF18;hCGBP;HsT2645    | transcripti | kinesin      | regulation   |
| GI_7656978-S | 316.1  | 389.4  | 362.2  | CIDEB    | <a href="#">NM_014430.1</a> |                                   | apoptosis   | intracellula | DNA          |
| GI_7656980-I | 1039.2 | 829.8  | 605.4  | CLDN15   | <a href="#">NM_014343.1</a> | MGC19536                          |             |              |              |

|              |        |        |        |            |                             |                                  |             |             |              |
|--------------|--------|--------|--------|------------|-----------------------------|----------------------------------|-------------|-------------|--------------|
| GI_7656994-S | 2577.9 | 1943.7 | 2506.8 | CARHSP1    | <a href="#">NM_014316.1</a> | CRHSP-24                         | signal      | cytoplasm   | intracellula |
| GI_7656998-S | 105.2  | 114.3  | 111.9  | CTNNA2     | <a href="#">NM_004389.1</a> | CAPR;CTNR;CAP-R                  | structural  | cytoskelet  | cell         |
| GI_7657006-S | 172.6  | 181.9  | 181.5  | DAPP1      | <a href="#">NM_014395.1</a> | BAM32                            | phospholi   |             | signal       |
| GI_7657008-S | 112.7  | 113.9  | 140.4  | DBC1       | <a href="#">NM_014618.1</a> | FAM5A;DBCCR1                     | tumor       |             | oncogene     |
| GI_7657020-S | 105.7  | 129.4  | 109.4  | DKFZP434P2 | <a href="#">NM_014549.1</a> | UNQ2565                          | DNA         | nucleus     | regulation   |
| GI_7657022-S | 130.6  | 126.2  | 107.9  | DKK2       | <a href="#">NM_014421.1</a> | DKK-2                            |             |             | extracellul  |
| GI_7657024-S | 113.6  | 114.4  | 99.1   | DKK4       | <a href="#">NM_014420.1</a> | DKK-4;hdkk-4                     | molecular   | cellular_co | developm     |
| GI_7657032-S | 625.4  | 569    | 418.4  | NT5C       | <a href="#">NM_014595.1</a> | DNT;cdN;DNT1;P5N2;PN-I;PN-       | transcripti | nucleus     | regulation   |
| GI_7657034-S | 640.1  | 566.8  | 453.2  | APC10      | <a href="#">NM_014885.1</a> | DOC1;DKFZP564L0562;ANAPC10-      | ubiquitin-  | anaphase-   | mitotic      |
| GI_7657036-A | 168.9  | 181.9  | 158.2  | DOC1       | <a href="#">NM_014890.1</a> | GIP90                            |             |             |              |
| GI_7657036-I | 90.8   | 91.8   | 82.2   | DOC1       | <a href="#">NM_014890.1</a> | GIP90                            |             |             |              |
| GI_7657040-S | 132.4  | 138.3  | 143.7  | DRIM       | <a href="#">NM_014503.1</a> |                                  |             |             | negative     |
| GI_7657043-S | 9472.9 | 9059.6 | 7718.3 | NGFRAP1    | <a href="#">NM_014380.1</a> | Bex;BEX3;NADE;HGR74;DXS6984E     |             |             | developm     |
| GI_7657045-S | 1728.6 | 1933.9 | 1788.7 | UBE2S      | <a href="#">NM_014501.1</a> | E2-EPF                           | ubiquitin   |             | protein      |
| GI_7657055-S | 168.2  | 305.4  | 288.6  | EHD3       | <a href="#">NM_014600.1</a> |                                  | nucleic     | kinesin     |              |
| GI_7657057-S | 3122.9 | 2531   | 2049.9 | EIF2B2     | <a href="#">NM_014239.1</a> | EIF2B;EIF-2Bbeta                 | translation | eukaryotic  | translation  |
| GI_7657065-A | 236.2  | 283.4  | 267.1  | ERG        | <a href="#">NM_004449.2</a> |                                  | DNA         | nucleus     | protein      |
| GI_7657068-S | 1118.3 | 1443.6 | 649.2  | ERO1L      | <a href="#">NM_014584.1</a> |                                  | calcium     | microsom    | response     |
| GI_7657070-S | 244.1  | 182.6  | 166.2  | OPN3       | <a href="#">NM_014322.1</a> | ERO;ECPN;NMO-1;PANOPSIN          | G-protein   | integral to | G-protein    |
| GI_7657074-S | 328    | 161.8  | 162.6  | EVI2A      | <a href="#">NM_014210.1</a> | EVDA;EVI2                        | transmem    | integral to | cell         |
| GI_7657091-S | 155.2  | 171.4  | 143.4  | IL1F6      | <a href="#">NM_014440.1</a> | FIL1E;IL1(EPSILON);FIL1(EPSILON) |             |             |              |
| GI_7657101-S | 517.1  | 497.7  | 537.8  | FRAG1      | <a href="#">NM_014489.1</a> |                                  | tumor       | integral to |              |
| GI_7657105-S | 135    | 149.1  | 145.5  | GABRP      | <a href="#">NM_014211.1</a> |                                  | GABA-A      | integral to | ion          |
| GI_7657121-S | 2136.7 | 1787.9 | 1450.2 | GEMIN4     | <a href="#">NM_015721.1</a> | HHRF-1;DKFZP434B131;DKFZP434D174 | small       | nucleolus   | ribosome     |
| GI_7657123-S | 375.9  | 373.6  | 342.2  | TNFAIP8    | <a href="#">NM_014350.1</a> | GG2-1;SCC-S2;MDC-3.13            |             |             | anti-        |
| GI_7657125-S | 109.4  | 127.4  | 108    | PLA2G3     | <a href="#">NM_015715.1</a> | GIII-SPLA2                       | calcium-    | extracellul | phospholi    |
| GI_7657127-S | 152.8  | 171.7  | 158.5  | GLTSCR1    | <a href="#">NM_015711.1</a> |                                  | tumor       |             |              |
| GI_7657133-S | 1763.9 | 1639.7 | 1678.9 | GNPAT      | <a href="#">NM_014236.1</a> | DAPAT;DAP-AT;DHAPAT              | acyltransf  | peroxisom   | fatty acid   |
| GI_7657135-S | 741.3  | 394.8  | 191.4  | GPR160     | <a href="#">NM_014373.1</a> | GPCR1;GPCR150                    | receptor    | integral to | G-protein    |
| GI_7657141-S | 160.8  | 171.8  | 156.1  | GPR58      | <a href="#">NM_014626.1</a> |                                  | G-protein   | integral to | G-protein    |
| GI_7657151-S | 205    | 201.6  | 226.8  | HERC3      | <a href="#">NM_014606.1</a> |                                  |             |             |              |
| GI_7657155-S | 92.4   | 100.5  | 80.7   | C6orf54    | <a href="#">NM_014354.1</a> | HGC6.1.1                         | molecular   | cellular_co | biological_  |
| GI_7657157-S | 101.5  | 96.2   | 84.7   | C6orf123   | <a href="#">NM_014356.1</a> | HGC6.2;dJ431P23.4                | molecular   | cellular_co | biological_  |
| GI_7657177-S | 1553   | 1393.1 | 1092.7 | TMEM5      | <a href="#">NM_014254.1</a> | HP10481                          |             |             | integral to  |
| GI_7657183-S | 346.3  | 361.6  | 410.2  | ZNF318     | <a href="#">NM_014345.1</a> | ZFP318;HRIHFB2436                | RNA         | nucleus     |              |
| GI_7657185-S | 95.2   | 110.2  | 95.5   | HS322B1A   | <a href="#">NM_015371.1</a> |                                  |             |             |              |
| GI_7657193-S | 97.2   | 94.8   | 87.3   | HS747E2A   | <a href="#">NM_015370.1</a> |                                  |             |             |              |
| GI_7657197-S | 3199.7 | 2211.8 | 1954.6 | HSA9761    | <a href="#">NM_014473.1</a> |                                  | S-          |             | mRNA         |
| GI_7657203-S | 845.6  | 861.8  | 795.9  | HSU15552   | <a href="#">NM_014597.1</a> |                                  |             |             |              |
| GI_7657209-S | 344.3  | 450    | 360.2  | ARFIP1     | <a href="#">NM_014447.1</a> | HSU52521                         |             |             |              |
| GI_7657213-S | 94.4   | 112.3  | 108.9  | HUNK       | <a href="#">NM_014586.1</a> |                                  | protein     |             | signal       |
| GI_7657217-A | 133.1  | 146    | 141.1  | BRD4       | <a href="#">NM_014299.1</a> | CAP;MCAP;HUNKI                   |             |             |              |
| GI_7657217-I | 158.5  | 205.8  | 193.7  | BRD4       | <a href="#">NM_014299.1</a> | CAP;MCAP;HUNKI                   |             |             |              |
| GI_7657235-S | 263.9  | 341.7  | 329.1  | IMPA2      | <a href="#">NM_014214.1</a> |                                  | inositol-   |             | phosphate    |

|              |         |        |        |           |                             |                                |             |             |             |
|--------------|---------|--------|--------|-----------|-----------------------------|--------------------------------|-------------|-------------|-------------|
| GI_7657241-S | 122.6   | 131.1  | 120.8  | FETUB     | <a href="#">NM_014375.1</a> | 16G2;Gugu;IRL685               | cysteine    | extracellul | biological_ |
| GI_7657256-S | 4111.9  | 4579.5 | 3611.1 | TOMM20    | <a href="#">NM_014765.1</a> | MAS20;MOM19;TOM20;KIAA0016     | protein     | mitochond   | mitochond   |
| GI_7657258-S | 113.9   | 132.7  | 102.7  | KIAA0040  | <a href="#">NM_014656.1</a> |                                |             |             |             |
| GI_7657260-S | 921.7   | 787    | 670.1  | PDZGEF1   | <a href="#">NM_014247.1</a> |                                |             |             |             |
| GI_7657268-I | 228.8   | 222.2  | 267.1  | APRIN     | <a href="#">NM_015032.1</a> | AS3;CG008;FLJ23236;KIAA0979    | ATP         | nucleus     | negative    |
| GI_7657270-S | 80.8    | 96.1   | 81.2   | KIR2DL1   | <a href="#">NM_014218.1</a> | 47.11;CL-42;NKAT1;P58.1;CD158A | receptor    | integral to | immune      |
| GI_7657272-S | 123.1   | 129    | 122.2  | KIR2DL2   | <a href="#">NM_014219.1</a> | CL-43;NKAT6;p58.2;CD158B1      | receptor    | integral to |             |
| GI_7657276-S | 143.9   | 116.3  | 138.7  | KIR2DS1   | <a href="#">NM_014512.1</a> | p50.1;CD158H;EB6ActI;EB6ActII  | transmem    | integral to | immune      |
| GI_7657278-S | 171.2   | 195.1  | 188.7  | KIR2DS5   | <a href="#">NM_014513.1</a> | NKAT9;CD158G                   | receptor    | integral to | immune      |
| GI_7657280-S | 89.5    | 95.3   | 87.7   | KIR3DS1   | <a href="#">NM_014514.1</a> | NKAT10;CD158E2                 |             |             |             |
| GI_7657290-S | 113.1   | 119.1  | 116.9  | CD207     | <a href="#">NM_015717.1</a> | LANGERIN                       | internaliza | endocytoti  | heterophili |
| GI_7657298-S | 197.4   | 232.7  | 219    | TFCP2L1   | <a href="#">NM_014553.1</a> | CRTR1;LBP-9                    | transcripti |             | pregnancy   |
| GI_7657300-S | 2063.9  | 1772.3 | 1467.7 | KLHDC2    | <a href="#">NM_014315.1</a> | LCP;HCLP-1                     |             |             |             |
| GI_7657306-S | 216     | 218.8  | 229.8  | LIMD1     | <a href="#">NM_014240.1</a> |                                | protein     | nuclear     | cell growth |
| GI_7657312-S | 3018.3  | 3250.7 | 2476.7 | LSM1      | <a href="#">NM_014462.1</a> | CASM;YJL124C                   | pre-mRNA    | small       | mRNA        |
| GI_7657314-S | 2098.3  | 2367.2 | 2471.5 | LSM3      | <a href="#">NM_014463.1</a> | SMX4;USS2;YLR438C              | pre-mRNA    | small       | mRNA        |
| GI_7657325-S | 509.2   | 603.1  | 678.3  | MEA       | <a href="#">NM_014623.1</a> | HYS                            |             |             | male        |
| GI_7657330-A | 96.4    | 96.5   | 84.2   | ITGB1BP3  | <a href="#">NM_014446.1</a> | MIBP                           | protein     | peripheral  | myoblast    |
| GI_7657332-S | 178.5   | 204.7  | 188.8  | CLECSF9   | <a href="#">NM_014358.1</a> | MINCLE                         | lectin [goi |             | antimicrob  |
| GI_7657336-S | 281.6   | 347.4  | 308.4  | MLH3      | <a href="#">NM_014381.1</a> | HNPCC;S240II117                | satellite   | cellular_co | mismatch    |
| GI_7657340-S | 148.7   | 170.2  | 147.9  | MORC      | <a href="#">NM_014429.1</a> |                                | ATP         | nucleus     | spermatog   |
| GI_7657344-S | 10545.6 | 9004.2 | 9123.6 | MTCH1     | <a href="#">NM_014341.1</a> | PSAP;CGI-64                    |             |             |             |
| GI_7657348-S | 609.3   | 621.9  | 592.9  | MTCP1     | <a href="#">NM_014221.1</a> | C6.1B                          |             |             | oncogene    |
| GI_7657350-S | 1432.1  | 1313.7 | 1070.9 | MYBBP1A   | <a href="#">NM_014520.1</a> | P160;PAP2                      | transcripti | nucleolus   | regulation  |
| GI_7657354-S | 325.8   | 277.1  | 311.3  | AKAP8L    | <a href="#">NM_014371.1</a> | HAP95;NAKAP95                  | DEAD/H-     | nucleus     | biological_ |
| GI_7657384-S | 2729.2  | 2454.3 | 2088.7 | CNOT2     | <a href="#">NM_014515.1</a> | NOT2;CDC36;NOT2H;HSPC131       |             |             |             |
| GI_7657392-S | 389.2   | 408.5  | 451.8  | NR1       | <a href="#">NM_014434.1</a> |                                | flavin-     | cytoplasm   | oncogene    |
| GI_7657404-S | 111.7   | 116    | 115.2  | OBP2A     | <a href="#">NM_014582.1</a> | OBP;hOBPIIa;hOBPIIa(alpha)     | odorant     | cellular_co | chemosen    |
| GI_7657406-S | 135.8   | 168.2  | 170.6  | OBP2B     | <a href="#">NM_014581.1</a> | hOBPIIb                        | odorant     | cellular_co | chemosen    |
| GI_7657408-S | 102.2   | 112.7  | 117.3  | POU2F3    | <a href="#">NM_014352.1</a> | OCT11;PLA-1;Epc-1;Skn-1a       | transcripti | nucleus     | epidermal   |
| GI_7657410-S | 94.9    | 82.6   | 89.5   | ODZ1      | <a href="#">NM_014253.1</a> | TNM;ODZ3;TNM1;TEN-M1           | heparin     | extracellul | negative    |
| GI_7657420-S | 131.7   | 152    | 149.1  | OR1A1     | <a href="#">NM_014565.1</a> | OR17-7                         | olfactory   | integral to | olfaction   |
| GI_7657422-S | 169.7   | 198.2  | 183.8  | OR1D5     | <a href="#">NM_014566.1</a> | OR17-31                        | olfactory   | integral to | olfaction   |
| GI_7657430-S | 7431.7  | 8741.8 | 7292.1 | SND1      | <a href="#">NM_014390.1</a> | p100                           | transcripti | nucleus     |             |
| GI_7657432-S | 131.4   | 151.3  | 145    | P101-PI3K | <a href="#">NM_014308.1</a> |                                |             |             |             |
| GI_7657436-S | 267.6   | 455.3  | 276.3  | SESN1     | <a href="#">NM_014454.1</a> | PA26;SEST1                     |             | nucleus     | cell cycle  |
| GI_7657442-A | 71.4    | 76.9   | 80.3   | PCDH11X   | <a href="#">NM_014522.1</a> | PCDHX;PCDH-X;PCDH11            | cell        | integral to |             |
| GI_7657442-I | 83.2    | 85.5   | 83.8   | PCDH11X   | <a href="#">NM_014522.1</a> | PCDHX;PCDH-X;PCDH11            | cell        | integral to |             |
| GI_7657452-S | 198.5   | 726.8  | 322.5  | SPINK4    | <a href="#">NM_014471.1</a> | PEC-60                         | serine      |             |             |
| GI_7657456-S | 117.5   | 117    | 101    | PGDS      | <a href="#">NM_014485.1</a> |                                | prostaglan  | cytoplasm   | locomotor   |
| GI_7657458-S | 100.9   | 110.9  | 95     | PKD2L2    | <a href="#">NM_014386.1</a> |                                | cation      | kinesin     | cation      |
| GI_7657460-S | 198     | 224.1  | 201.6  | PLA2G2E   | <a href="#">NM_014589.1</a> |                                | secreted    | extracellul | phospholi   |
| GI_7657464-S | 856.4   | 820.7  | 1075.9 | PODLX2    | <a href="#">NM_015720.1</a> |                                | glycosami   | integral to |             |
| GI_7657468-S | 90.4    | 95.7   | 80.7   | POM121L1  | <a href="#">NM_014348.1</a> |                                |             |             |             |

|              |         |        |        |            |                             |                                   |              |             |             |
|--------------|---------|--------|--------|------------|-----------------------------|-----------------------------------|--------------|-------------|-------------|
| GI_7657477-S | 111.6   | 134.3  | 115.1  | RDH8       | <a href="#">NM_015725.1</a> | PRRDH                             | retinol      | integral to | vision      |
| GI_7657479-S | 4096.1  | 4063.1 | 3943   | GHITM      | <a href="#">NM_014394.1</a> | DERP2;My021;PTD010;HSPC282        |              | integral to |             |
| GI_7657495-S | 794.4   | 650.4  | 696    | RABGEF1    | <a href="#">NM_014504.1</a> | RABEX5;rabex-5                    | zinc ion     |             |             |
| GI_7657497-S | 1230.6  | 2009.8 | 1480.8 | RAGE       | <a href="#">NM_014226.1</a> | MOK;RAGE1                         | protein      | cytoplasm   | protein     |
| GI_7657503-S | 147.5   | 214.1  | 94.3   | RBM9       | <a href="#">NM_014309.1</a> | RTA;HRNBP2                        | transcripti  | nucleus     | RNA         |
| GI_7657505-S | 223.2   | 194.7  | 178.9  | RBMS3      | <a href="#">NM_014483.1</a> |                                   | RNA          |             |             |
| GI_7657525-S | 77.1    | 87.3   | 72.2   | RPS6KA6    | <a href="#">NM_014496.1</a> | RSK4                              | protein      |             | central     |
| GI_7657539-S | 547.2   | 622.2  | 635.9  | SCHIP1     | <a href="#">NM_014575.1</a> | SCHIP-1                           |              | cytoplasm   |             |
| GI_7657541-S | 223.3   | 250.7  | 231.3  | SCN11A     | <a href="#">NM_014139.1</a> | NAV1.9;SCN12A                     | voltage-     | integral to | drug        |
| GI_7657543-S | 118.6   | 139.6  | 137.9  | SCN8A      | <a href="#">NM_014191.1</a> | MED                               | voltage-     | voltage-    | sodium      |
| GI_7657561-S | 1971.1  | 2251   | 2304.1 | SH3BP4     | <a href="#">NM_014521.1</a> | BOG25                             | signal       | nucleus     | endocytosi  |
| GI_7657569-I | 108.7   | 111.3  | 106.4  | SIGLEC7    | <a href="#">NM_014385.1</a> | p75;QA79;AIMR1;SIGLEC-7;p75/AIMR1 | lectin [goid | integral to | cell        |
| GI_7657571-S | 576.1   | 733.1  | 637    | SIGLEC8    | <a href="#">NM_014442.1</a> | SAF2;SIGLEC-8;SIGLEC8L            | lectin [goid | integral to | signal      |
| GI_7657580-S | 941     | 921.9  | 1289.4 | SLC25A13   | <a href="#">NM_014251.1</a> | CTLN2;CITRIN;ARALAR2              | carrier      | mitochond   | small       |
| GI_7657584-S | 453.6   | 427.2  | 437.3  | SLC25A15   | <a href="#">NM_014252.1</a> | HHH;ORNT1;D13S327                 | L-ornithine  | mitochond   | mitochond   |
| GI_7657586-S | 133.7   | 125.8  | 129    | SLC6A11    | <a href="#">NM_014229.1</a> | GAT3;GAT-3                        | betaine/G    | integral to | neurotran   |
| GI_7657590-S | 112.4   | 114.6  | 91.8   | SLC7A9     | <a href="#">NM_014270.1</a> | CSNU3                             | amino        | integral to | small       |
| GI_7657596-S | 1699.9  | 1814.7 | 2010.1 | SMUG1      | <a href="#">NM_014311.1</a> |                                   | uracil DNA   |             | DNA         |
| GI_7657610-S | 1772    | 1990   | 2284.2 | DNAJC8     | <a href="#">NM_014280.1</a> | SPF31                             | chaperone    |             |             |
| GI_7657614-S | 212.2   | 235.8  | 218.1  | NPHS2      | <a href="#">NM_014625.1</a> | PDCN;SRN1                         |              | integral to | excretion   |
| GI_7657618-S | 283.9   | 528.9  | 241.7  | SRPUL      | <a href="#">NM_014467.1</a> |                                   |              |             | oncogene    |
| GI_7657624-S | 184.5   | 284.4  | 303.9  | STAU2      | <a href="#">NM_014393.1</a> | 39K2;39K3                         | double-      |             |             |
| GI_7657628-S | 121.8   | 125    | 134.2  | STK23      | <a href="#">NM_014370.1</a> | MSSK1                             | cAMP-        | cellular_co | protein     |
| GI_7657640-S | 796.9   | 679.1  | 592.7  | TGDS       | <a href="#">NM_014305.1</a> | TDPGD                             | dTDP-        |             | nucleotide- |
| GI_7657644-S | 106.7   | 112.5  | 106.8  | TINAG      | <a href="#">NM_014464.1</a> | TIN1;TIN2;TIN-AG                  | nucleotide   | basement    | Malpighia   |
| GI_7657658-S | 118.1   | 119.6  | 124.7  | TRPS1      | <a href="#">NM_014112.1</a> | GC79                              | zinc ion     | nucleus     | NLS-        |
| GI_7657664-S | 102.6   | 103.2  | 101    | TZFP       | <a href="#">NM_014383.1</a> | FAXF;FAZF                         | transcripti  | nucleus     | negative    |
| GI_7657670-S | 300.2   | 351.4  | 342.6  | UBTF       | <a href="#">NM_014233.1</a> | UBF;NOR-90                        | RNA          | nucleolus   | regulation  |
| GI_7657674-S | 240.5   | 287.8  | 252.1  | VAMP2      | <a href="#">NM_014232.1</a> | SYB2;VAMP-2                       |              | secretory   | nonselecti  |
| GI_7657692-S | 209.7   | 223.7  | 211.6  | ZNF324     | <a href="#">NM_014347.1</a> | ZF5128                            | DNA          | nucleus     | regulation  |
| GI_7657698-S | 103.9   | 121    | 101.2  | SLC39A2    | <a href="#">NM_014579.1</a> | ZIP2                              | zinc ion     | integral to | zinc ion    |
| GI_7657702-S | 165.3   | 153.6  | 137.6  | ZNF-U69274 | <a href="#">NM_014415.1</a> |                                   | protein      | aspartate   | 'de novo'   |
| GI_7657706-S | 228.2   | 208.5  | 241.2  | ZNF237     | <a href="#">NM_014242.1</a> | HSPC050;ZNF198L1                  |              |             |             |
| GI_7661527-S | 854.8   | 742    | 702.3  | AD-003     | <a href="#">NM_014064.1</a> |                                   | S-           |             |             |
| GI_7661531-S | 1398.8  | 1201.7 | 866.4  | NOB1P      | <a href="#">NM_014062.1</a> | ART-4                             |              |             |             |
| GI_7661537-S | 10168.6 | 7357.5 | 9125.5 | BRI3       | <a href="#">NM_015379.1</a> | I3                                |              | integral to |             |
| GI_7661547-S | 3589.2  | 3845.7 | 3382.2 | CL25022    | <a href="#">NM_015702.1</a> |                                   |              |             |             |
| GI_7661555-S | 723.6   | 795.4  | 878.8  | TRUB2      | <a href="#">NM_015679.1</a> | CLONE24922                        | pseudouri    |             | RNA         |
| GI_7661563-S | 200.9   | 230.9  | 124    | TTLL3      | <a href="#">NM_015644.1</a> | HOTTL;DKFZP434B103                | tubulin-     |             | protein     |
| GI_7661565-S | 336.8   | 328.1  | 272.3  | DKFZP434B1 | <a href="#">NM_015434.1</a> |                                   |              |             |             |
| GI_7661567-S | 492.6   | 842.5  | 770    | PGM3       | <a href="#">NM_015599.1</a> | AGM1;PAGM;DKFZP434B187            | phosphoa     | cellular_co | carbohydr   |
| GI_7661579-I | 1357.3  | 1391   | 1583   | DKFZP434J1 | <a href="#">NM_015610.1</a> | CGI-50;FLJ12979;FLJ14217          |              |             |             |
| GI_7661585-S | 176.6   | 190.5  | 173    | DKFZP434OC | <a href="#">NM_015594.1</a> |                                   |              |             |             |
| GI_7661591-S | 352.7   | 487.2  | 487.1  | ASF1A      | <a href="#">NM_014034.1</a> | CIA;DKFZP547E2110                 |              |             |             |

|              |        |        |        |            |                             |                                      |            |             |             |
|--------------|--------|--------|--------|------------|-----------------------------|--------------------------------------|------------|-------------|-------------|
| GI_7661597-S | 3737.7 | 2845.9 | 4014.4 | DNAPTP6    | <a href="#">NM_015535.1</a> | DKFZp564A2416                        |            |             |             |
| GI_7661599-S | 400.3  | 497.6  | 515.7  | DKFZP564B1 | <a href="#">NM_015582.1</a> | MGC8471                              |            |             |             |
| GI_7661601-S | 834.6  | 968.5  | 866.6  | DKFZP564B1 | <a href="#">NM_015415.1</a> |                                      | molecular  |             |             |
| GI_7661605-S | 872.3  | 960.6  | 830.3  | DKFZP564C1 | <a href="#">NM_015658.1</a> |                                      | molecular  | nucleus     |             |
| GI_7661615-S | 671.9  | 1117.8 | 226.3  | DKFZP564K1 | <a href="#">NM_015544.1</a> |                                      |            |             |             |
| GI_7661617-S | 746.3  | 689.1  | 671.2  | DKFZP564K2 | <a href="#">NM_015421.1</a> |                                      |            |             |             |
| GI_7661619-S | 1640.7 | 1828.3 | 1922.8 | HIG1       | <a href="#">NM_014056.1</a> | DKFZP564K247                         |            |             |             |
| GI_7661621-S | 427.3  | 536.7  | 525    | DKFZP564M  | <a href="#">NM_014042.1</a> |                                      |            |             |             |
| GI_7661625-S | 5079.3 | 5307.5 | 4782.4 | PAI-RBP1   | <a href="#">NM_015640.1</a> | CGI-55;DKFZp564M2423                 | DNA        | nucleus     | regulation  |
| GI_7661631-S | 503.5  | 604.7  | 515.7  | DKFZP564O  | <a href="#">NM_015393.1</a> |                                      |            |             |             |
| GI_7661635-S | 378.6  | 397.6  | 378.6  | P29        | <a href="#">NM_015484.1</a> | DKFZP564O2082                        | protein    | nucleus     | biological_ |
| GI_7661645-S | 5457.1 | 5453.9 | 4950.9 | DKFZP566E1 | <a href="#">NM_015523.1</a> | SFN;CGI-114                          | 3'-5'      | mitochond   | nucleotide  |
| GI_7661651-S | 418    | 402.2  | 524.1  | ZNF288     | <a href="#">NM_015642.1</a> | HOF;DPZF;ODA-8S;DKFZp566F123         | protein    | nucleus     | regulation  |
| GI_7661667-S | 226.8  | 285.2  | 308.3  | E2IG4      | <a href="#">NM_015516.1</a> | DKFZP586E011                         |            |             |             |
| GI_7661669-S | 166.4  | 210.8  | 156.3  | SH3YL1     | <a href="#">NM_015677.1</a> | Ray;DKFZP586F1318                    |            |             |             |
| GI_7661685-S | 194.9  | 210.5  | 184    | POLR1A     | <a href="#">NM_015425.1</a> | RPA1;RPO1-4;FLJ21915;DKFZP586M0122   | DNA-       | nucleus     | transcripti |
| GI_7661687-S | 105.4  | 120.7  | 114.9  | DKFZP586M  | <a href="#">NM_015583.1</a> |                                      |            |             |             |
| GI_7661689-S | 242.2  | 210.1  | 262.8  | CCDC9      | <a href="#">NM_015603.1</a> | DKFZP586M1019                        |            |             |             |
| GI_7661691-S | 1381.2 | 4286   | 3230.8 | DKFZP586N  | <a href="#">NM_015400.1</a> | HSPC193                              |            |             |             |
| GI_7661695-S | 2454.6 | 2893.5 | 2848.9 | FAM32A     | <a href="#">NM_014077.1</a> | DKFZP586O0120                        |            |             |             |
| GI_7661699-I | 109.5  | 118.8  | 109.6  | SORBS1     | <a href="#">NM_015385.1</a> | CAP;SH3D5;SORB1;SH3P12;ponsin;FLJ124 | cytoskelet | cell-cell   | cell-matrix |
| GI_7661707-S | 144.7  | 156.9  | 180.7  | FLVCR      | <a href="#">NM_014053.1</a> |                                      | transporte | integral to | small       |
| GI_7661713-S | 1601.4 | 1878.5 | 1992.9 | FAM3C      | <a href="#">NM_014888.1</a> | GS3786                               | cytokine   | extracellul | biological_ |
| GI_7661719-S | 1338.4 | 1240.2 | 1203.1 | HIRIP5     | <a href="#">NM_015700.1</a> | Nfu;CGI-33                           |            |             |             |
| GI_7661723-S | 105.1  | 105    | 106.5  | HSN44A4A   | <a href="#">NM_015372.1</a> |                                      |            |             |             |
| GI_7661727-S | 1711.7 | 2387.2 | 2080.8 | MAPBPIP    | <a href="#">NM_014017.1</a> | HSPC003                              |            | Golgi       |             |
| GI_7661731-S | 1835.3 | 2476.9 | 2776.2 | HSPC009    | <a href="#">NM_014019.1</a> |                                      |            |             |             |
| GI_7661741-S | 1739.6 | 1953.2 | 1629.7 | HSPC023    | <a href="#">NM_014047.1</a> |                                      |            |             |             |
| GI_7661743-S | 1271.9 | 1371.6 | 832.1  | BZW2       | <a href="#">NM_014038.1</a> | HSPC028                              |            |             |             |
| GI_7661745-S | 6818.4 | 7816.2 | 6780.5 | SPC12      | <a href="#">NM_014041.1</a> | HSPC033                              | peptidase  | microsom    | proteolysis |
| GI_7661749-S | 177.2  | 208.9  | 189.1  | HSPC047    | <a href="#">NM_014147.1</a> |                                      |            |             |             |
| GI_7661751-S | 121.4  | 136.7  | 132.7  | HSPC048    | <a href="#">NM_014148.1</a> |                                      |            |             |             |
| GI_7661757-S | 93.4   | 99.7   | 83     | C14orf110  | <a href="#">NM_014151.1</a> |                                      |            |             |             |
| GI_7661759-S | 114.3  | 117    | 110.7  | HSPC054    | <a href="#">NM_014152.1</a> |                                      |            |             |             |
| GI_7661763-I | 181.7  | 218.8  | 227.5  | HSPC056    | <a href="#">NM_014154.1</a> | DKFZP434A043                         |            |             |             |
| GI_7661765-S | 150.4  | 181.6  | 148.8  | HSPC063    | <a href="#">NM_014155.1</a> |                                      |            |             |             |
| GI_7661779-S | 300.3  | 370.1  | 335.4  | HSPC072    | <a href="#">NM_014162.1</a> |                                      |            |             |             |
| GI_7661781-S | 147.4  | 168.2  | 150.5  | HSPC073    | <a href="#">NM_014163.1</a> |                                      |            |             |             |
| GI_7661785-S | 761    | 622.8  | 604.6  | C6orf66    | <a href="#">NM_014165.1</a> | My013;HSPC125;ba22L21.1              |            |             |             |
| GI_7661789-S | 1761   | 1469.7 | 1276   | HSPC128    | <a href="#">NM_014167.1</a> |                                      |            |             |             |
| GI_7661791-S | 3409.5 | 3131.8 | 2248.5 | HSPC133    | <a href="#">NM_014168.1</a> |                                      | N-         |             | DNA         |
| GI_7661795-S | 601.4  | 723.7  | 573.5  | HSPC135    | <a href="#">NM_014170.1</a> |                                      |            |             |             |
| GI_7661801-S | 1687.2 | 2232.5 | 2008.3 | HSPC142    | <a href="#">NM_014173.1</a> |                                      |            |             |             |
| GI_7661807-S | 524    | 610.1  | 710.7  | HSPC150    | <a href="#">NM_014176.1</a> |                                      | ubiquitin  |             | ubiquitin   |

|              |        |        |        |          |                             |                              |                    |                        |
|--------------|--------|--------|--------|----------|-----------------------------|------------------------------|--------------------|------------------------|
| GI_7661809-S | 1809.7 | 2008.1 | 1693.5 | HSPC154  | <a href="#">NM_014177.1</a> |                              |                    |                        |
| GI_7661813-S | 780.4  | 805.9  | 1204.8 | HSPC157  | <a href="#">NM_014179.1</a> |                              |                    |                        |
| GI_7661817-S | 210.6  | 146.1  | 112.3  | HSPC159  | <a href="#">NM_014181.1</a> |                              | lectin [goid       |                        |
| GI_7661823-S | 2588.1 | 2427.3 | 2327.6 | HSPC163  | <a href="#">NM_014184.1</a> |                              |                    |                        |
| GI_7661825-A | 465.6  | 391.7  | 392.5  | RANGNRF  | <a href="#">NM_014185.1</a> | MOG1;HSPC165;HSPC236         |                    |                        |
| GI_7661827-S | 617.4  | 716.6  | 773.5  | COMMD9   | <a href="#">NM_014186.1</a> | HSPC166                      |                    |                        |
| GI_7661829-S | 303.4  | 365.5  | 379.1  | HSPC171  | <a href="#">NM_014187.1</a> |                              |                    |                        |
| GI_7661831-S | 5770.5 | 4958.5 | 4027.2 | HSPC182  | <a href="#">NM_014188.1</a> | FLJ13048                     |                    |                        |
| GI_7661835-S | 324.9  | 381.1  | 338.1  | ATP5S    | <a href="#">NM_015684.1</a> | ATPW;HSU79253                |                    |                        |
| GI_7661843-S | 220.1  | 271.1  | 264.1  | JM1      | <a href="#">NM_014008.1</a> |                              |                    |                        |
| GI_7661855-S | 754    | 728.9  | 589.2  | KIAA0010 | <a href="#">NM_014671.1</a> |                              |                    |                        |
| GI_7661859-S | 540.1  | 470.4  | 563.7  | LRRC14   | <a href="#">NM_014665.1</a> | KIAA0014                     |                    |                        |
| GI_7661869-S | 1433.1 | 1329.2 | 630.1  | HERPUD1  | <a href="#">NM_014685.1</a> | SUP;HERP;Mif1;KIAA0025       | molecular endoplas | response               |
| GI_7661877-S | 330.1  | 295.7  | 393.8  | KIF14    | <a href="#">NM_014875.1</a> |                              |                    |                        |
| GI_7661881-S | 117.9  | 121.2  | 90.9   | KIAA0053 | <a href="#">NM_014882.1</a> |                              |                    |                        |
| GI_7661883-S | 252.6  | 348    | 281.2  | HELZ     | <a href="#">NM_014877.1</a> |                              |                    |                        |
| GI_7661891-S | 143.3  | 131.9  | 125.8  | RCOR     | <a href="#">NM_015156.1</a> | COREST;KIAA0071              | DNA                | nucleus                |
| GI_7661895-S | 83.3   | 91.4   | 74.5   | KIAA0087 | <a href="#">NM_014769.1</a> |                              |                    |                        |
| GI_7661899-S | 1477.9 | 938.4  | 1051.7 | KIAA0092 | <a href="#">NM_014679.1</a> |                              |                    |                        |
| GI_7661907-S | 2611   | 3126.2 | 2914.3 | KIAA0102 | <a href="#">NM_014752.1</a> |                              | peptidase microsom |                        |
| GI_7661913-S | 2734.4 | 3686.4 | 3430.4 | p44S10   | <a href="#">NM_014814.1</a> | KIAA0107                     | ATPase             | proteasom ATP-         |
| GI_7661917-S | 1891.9 | 1834.4 | 1737.9 | MAD2L1BP | <a href="#">NM_014628.1</a> | CMT2;KIAA0110;dJ261G23.1     |                    |                        |
| GI_7661921-S | 595.5  | 600.4  | 574.6  | RAB21    | <a href="#">NM_014999.1</a> | KIAA0118                     | GTP                | small                  |
| GI_7661925-S | 660.7  | 449.1  | 536.9  | TRIP-Br2 | <a href="#">NM_014755.1</a> |                              |                    |                        |
| GI_7661931-S | 453    | 466.8  | 408    | KIAA0133 | <a href="#">NM_014777.1</a> |                              |                    |                        |
| GI_7661935-S | 1555.7 | 1511   | 1500.8 | SAFB2    | <a href="#">NM_014649.1</a> |                              |                    |                        |
| GI_7661941-S | 548.5  | 653.9  | 639    | NICE-4   | <a href="#">NM_014847.1</a> | KIAA0144                     |                    |                        |
| GI_7661945-S | 284.4  | 339.9  | 294.9  | IKBKE    | <a href="#">NM_014002.1</a> |                              |                    |                        |
| GI_7661957-S | 2284.8 | 2755.6 | 2084.5 | BTF      | <a href="#">NM_014739.1</a> |                              |                    |                        |
| GI_7661963-I | 105.5  | 113.4  | 109.5  | RASSF2   | <a href="#">NM_014737.1</a> | KIAA0168                     |                    | neuropepti             |
| GI_7661965-S | 582.7  | 488.6  | 582.7  | MDC1     | <a href="#">NM_014641.1</a> |                              |                    |                        |
| GI_7661969-S | 115.6  | 134.8  | 123.8  | TTLL4    | <a href="#">NM_014640.1</a> | KIAA0173                     | tubulin-           | protein                |
| GI_7661995-S | 514.2  | 628.3  | 529.2  | KIAA0205 | <a href="#">NM_014873.1</a> |                              |                    |                        |
| GI_7661997-S | 249    | 226.7  | 222.9  | TBC1D5   | <a href="#">NM_014744.1</a> | KIAA0210                     | GTPase             |                        |
| GI_7661999-S | 122.7  | 127.9  | 125.8  | KIAA0211 | <a href="#">NM_014630.1</a> |                              |                    |                        |
| GI_7662001-S | 2064.9 | 2503.6 | 2575.7 | EDEM1    | <a href="#">NM_014674.1</a> |                              |                    |                        |
| GI_7662009-S | 141.5  | 123.9  | 103.1  | KIAA0222 | <a href="#">NM_014643.1</a> |                              |                    |                        |
| GI_7662013-S | 2159   | 1789.4 | 1839.3 | KIAA0233 | <a href="#">NM_014745.1</a> |                              |                    |                        |
| GI_7662015-S | 186.1  | 259.9  | 173.8  | RIMS3    | <a href="#">NM_014747.1</a> |                              |                    |                        |
| GI_7662017-S | 294.8  | 277.4  | 277.2  | PHF3     | <a href="#">NM_015153.1</a> | KIAA0244                     | DNA                | transcripti            |
| GI_7662035-S | 91.2   | 94.6   | 84     | SPOCK2   | <a href="#">NM_014767.1</a> | testican-2                   | calcium            | extracellul synaptoge  |
| GI_7662041-S | 521.6  | 427.8  | 397.2  | ARHGEF10 | <a href="#">NM_014629.1</a> | GEF10;KIAA0294               |                    |                        |
| GI_7662045-S | 260.6  | 239.9  | 201.3  | MLL4     | <a href="#">NM_014727.1</a> | HRX2;MLL2;TRX2;WBP7;KIAA0304 | zinc ion           | nucleus chromatin-     |
| GI_7662051-S | 540.2  | 698.3  | 689    | KIAA0317 | <a href="#">NM_014821.1</a> |                              | ubiquitin-         | intracellula ubiquitin |



|              |        |        |        |            |                             |                        |                    |                    |
|--------------|--------|--------|--------|------------|-----------------------------|------------------------|--------------------|--------------------|
| GI_7662053-S | 94.1   | 104.9  | 107.2  | KIAA0319   | <a href="#">NM_014809.1</a> |                        |                    |                    |
| GI_7662057-S | 201.6  | 202.7  | 224.1  | KIAA0329   | <a href="#">NM_014844.1</a> |                        |                    |                    |
| GI_7662069-S | 150.6  | 134.2  | 121.9  | RALGPS1A   | <a href="#">NM_014636.1</a> |                        |                    |                    |
| GI_7662071-S | 175.8  | 211.8  | 194.6  | KIAA0352   | <a href="#">NM_014830.1</a> |                        |                    |                    |
| GI_7662073-S | 369.4  | 464.6  | 556.8  | ZBTB5      | <a href="#">NM_014872.1</a> |                        | protein            |                    |
| GI_7662075-S | 1287.2 | 1376.5 | 903.6  | KIAA0355   | <a href="#">NM_014686.1</a> |                        |                    |                    |
| GI_7662079-S | 388.7  | 351.8  | 327.8  | KIAA0373   | <a href="#">NM_014684.1</a> |                        |                    |                    |
| GI_7662087-S | 232.9  | 226.6  | 225.9  | ARHGEF12   | <a href="#">NM_015313.1</a> | LARG;PRO2792;KIAA0382  | signal             | intracellula       |
| GI_7662091-S | 129.5  | 152.2  | 141.2  | KIAA0390   | <a href="#">NM_014717.1</a> |                        |                    |                    |
| GI_7662093-S | 140.2  | 150.5  | 140.4  | KIAA0391   | <a href="#">NM_014672.1</a> |                        |                    |                    |
| GI_7662095-S | 128    | 161.9  | 143.5  | KIAA0408   | <a href="#">NM_014702.1</a> |                        |                    |                    |
| GI_7662099-S | 189.5  | 211.8  | 221.7  | ZNF297B    | <a href="#">NM_014007.1</a> | ZNF-X                  | protein            | nucleus regulation |
| GI_7662101-S | 114.9  | 132.1  | 128.4  | LRRTM2     | <a href="#">NM_015564.1</a> |                        |                    |                    |
| GI_7662103-S | 233.5  | 288.3  | 237.1  | FISH       | <a href="#">NM_014631.1</a> |                        |                    |                    |
| GI_7662107-S | 763    | 649.2  | 500.6  | ARHGEF9    | <a href="#">NM_015185.1</a> |                        |                    |                    |
| GI_7662111-S | 281.3  | 324.3  | 221.3  | KIAA0427   | <a href="#">NM_014772.1</a> |                        | RNA                | nucleus protein    |
| GI_7662115-S | 199.6  | 256.6  | 223.2  | KIAA0431   | <a href="#">NM_015251.1</a> |                        |                    |                    |
| GI_7662121-S | 170.3  | 196.2  | 289.7  | SETBP1     | <a href="#">NM_015559.1</a> | SEB;KIAA0437           | transporte membran | transport          |
| GI_7662125-S | 2952.6 | 2997.7 | 2416.2 | SIPA1L1    | <a href="#">NM_015556.1</a> | E6TP1;KIAA0440         | protein            |                    |
| GI_7662127-S | 491.1  | 438.6  | 455.8  | ZNF450     | <a href="#">NM_014797.1</a> |                        |                    |                    |
| GI_7662129-S | 84.3   | 98.7   | 93.5   | GASP       | <a href="#">NM_014710.1</a> |                        |                    |                    |
| GI_7662137-S | 824.1  | 1734.8 | 1396.5 | SDC3       | <a href="#">NM_014654.1</a> |                        |                    |                    |
| GI_7662139-S | 399.7  | 348.4  | 465.3  | KIAA0469   | <a href="#">NM_014851.1</a> |                        |                    |                    |
| GI_7662141-S | 481.5  | 475.6  | 403.4  | KAB        | <a href="#">NM_014812.1</a> | KIAA0470               |                    |                    |
| GI_7662143-S | 163.7  | 173.3  | 156.7  | HHL        | <a href="#">NM_014857.1</a> | KIAA0471               |                    |                    |
| GI_7662145-S | 102.9  | 96.1   | 100.5  | DNAJC6     | <a href="#">NM_014787.1</a> |                        |                    |                    |
| GI_7662151-S | 1225.5 | 1190.4 | 1250.5 | KIAA0476   | <a href="#">NM_014856.1</a> |                        |                    |                    |
| GI_7662157-S | 691.6  | 762.5  | 641.7  | KIAA0483   | <a href="#">NM_015176.1</a> |                        |                    |                    |
| GI_7662159-S | 1493.9 | 1820   | 2081.1 | KIAA0494   | <a href="#">NM_014774.1</a> |                        |                    |                    |
| GI_7662163-S | 213.3  | 247.6  | 196.6  | KIAA0513   | <a href="#">NM_014732.1</a> |                        |                    |                    |
| GI_7662167-S | 119.8  | 130.3  | 118.1  | ST18       | <a href="#">NM_014682.1</a> | ZNF387;KIAA0535        | transcripti        | nucleus regulation |
| GI_7662169-S | 687.1  | 679.2  | 613.5  | ARK5       | <a href="#">NM_014840.1</a> |                        |                    |                    |
| GI_7662177-S | 107.9  | 100.6  | 96.4   | KIAA0555   | <a href="#">NM_014790.1</a> |                        |                    |                    |
| GI_7662179-S | 279.8  | 338.1  | 286.2  | KIAA0562   | <a href="#">NM_014704.1</a> |                        |                    |                    |
| GI_7662181-S | 93.2   | 103.9  | 82     | KIAA0563   | <a href="#">NM_014834.1</a> |                        |                    |                    |
| GI_7662195-I | 112.3  | 126.9  | 120.9  | GALNAC4S-ε | <a href="#">NM_014863.1</a> | BRAG;KIAA0598;MGC34346 |                    |                    |
| GI_7662203-S | 609.3  | 555.9  | 596.3  | N4BP1      | <a href="#">NM_014664.1</a> |                        |                    |                    |
| GI_7662213-S | 1216.8 | 1467.5 | 1206.5 | KIAA0628   | <a href="#">NM_014789.1</a> |                        |                    |                    |
| GI_7662215-S | 404.8  | 291.2  | 328.4  | KIAA0635   | <a href="#">NM_014645.1</a> |                        |                    |                    |
| GI_7662217-S | 438    | 399.3  | 371.1  | ZBED4      | <a href="#">NM_014838.1</a> |                        |                    |                    |
| GI_7662219-S | 206    | 239.9  | 238    | KIAA0644   | <a href="#">NM_014817.1</a> |                        |                    |                    |
| GI_7662221-S | 165.2  | 180.9  | 182    | KIAA0645   | <a href="#">NM_014662.1</a> |                        |                    |                    |
| GI_7662227-S | 71.4   | 71.2   | 101.4  | SNAP91     | <a href="#">NM_014841.1</a> |                        |                    |                    |
| GI_7662231-S | 2588.9 | 2702.5 | 2589   | KIAA0663   | <a href="#">NM_014827.1</a> |                        | nucleic            |                    |

|              |        |        |                  |                             |                                    |            |             |              |
|--------------|--------|--------|------------------|-----------------------------|------------------------------------|------------|-------------|--------------|
| GI_7662237-S | 667.1  | 790.9  | 673.2 ACINUS     | <a href="#">NM_014977.1</a> | ACN;KIAA0670                       | ATPase     | nucleus     | erythrocyt   |
| GI_7662241-S | 170.1  | 136.3  | 110.8 KIAA0672   | <a href="#">NM_014859.1</a> |                                    |            |             |              |
| GI_7662245-S | 264.6  | 258.9  | 230.2 JMJD2A     | <a href="#">NM_014663.1</a> | JMJD2;KIAA0677                     | DNA        |             | regulation   |
| GI_7662247-S | 367.7  | 465.6  | 361.4 C6orf56    | <a href="#">NM_014721.1</a> |                                    |            |             |              |
| GI_7662255-S | 239.5  | 284    | 210.7 KIAA0703   | <a href="#">NM_014861.1</a> |                                    |            |             |              |
| GI_7662259-S | 98.6   | 83     | 78.6 KIAA0711    | <a href="#">NM_014867.1</a> |                                    |            |             |              |
| GI_7662265-S | 218.2  | 246.4  | 251.9 IPO13      | <a href="#">NM_014652.1</a> | IMP13;RANBP13;KIAA0724             | protein    | nuclear     | protein-     |
| GI_7662267-S | 161.8  | 233.5  | 186.1 CLSTN3     | <a href="#">NM_014718.1</a> | CSTN3;KIAA0726                     | calcium    | integral to | homophili    |
| GI_7662271-S | 426    | 500.5  | 406.8 SV2A       | <a href="#">NM_014849.1</a> | SV2;KIAA0736                       | transporte | integral to | transport    |
| GI_7662273-S | 387.9  | 394.7  | 366.1 C14orf92   | <a href="#">NM_014828.1</a> |                                    |            |             |              |
| GI_7662275-S | 252.9  | 311.7  | 308.3 KIAA0738   | <a href="#">NM_014719.1</a> |                                    |            |             |              |
| GI_7662279-I | 198    | 143.7  | 153.6 HDAC9      | <a href="#">NM_014707.1</a> | HD7;HDAC;HDRP;MITR;HDAC7;HDAC7B;H  | histone    | nucleus     | regulation   |
| GI_7662281-S | 125.8  | 128    | 113.3 KIAA0748   | <a href="#">NM_014796.1</a> |                                    |            |             |              |
| GI_7662287-S | 256.6  | 258.3  | 227 KIAA0753     | <a href="#">NM_014804.1</a> |                                    |            |             |              |
| GI_7662289-S | 150.5  | 210.1  | 155.5 KIAA0763   | <a href="#">NM_014869.1</a> |                                    |            |             |              |
| GI_7662291-S | 154.6  | 174.9  | 162.8 STAF65(gam | <a href="#">NM_014860.1</a> |                                    |            |             |              |
| GI_7662295-S | 1123.5 | 757.8  | 663.5 KIAA0769   | <a href="#">NM_014824.1</a> |                                    |            |             |              |
| GI_7662301-S | 372.9  | 428.3  | 372.3 ProSAPiP2  | <a href="#">NM_014726.1</a> |                                    |            |             |              |
| GI_7662303-S | 204.8  | 194.4  | 160.6 PHF14      | <a href="#">NM_014660.1</a> |                                    |            |             |              |
| GI_7662307-S | 495.4  | 523.5  | 509 KIAA0792     | <a href="#">NM_014698.1</a> |                                    |            |             |              |
| GI_7662309-S | 130.1  | 141    | 137.2 FARP2      | <a href="#">NM_014808.1</a> |                                    |            |             |              |
| GI_7662311-S | 603.8  | 542.8  | 453.9 SENP6      | <a href="#">NM_015571.1</a> | SSP1;SUSP1;KIAA0797                | cysteine-  |             | proteolysis  |
| GI_7662313-S | 349.3  | 411.8  | 423 ZNF432       | <a href="#">NM_014650.1</a> |                                    | DNA        | nucleus     | regulation   |
| GI_7662315-S | 185.4  | 177.7  | 204.9 VprBP      | <a href="#">NM_014703.1</a> |                                    |            |             |              |
| GI_7662319-S | 211.9  | 197.8  | 179.1 LRIG2      | <a href="#">NM_014813.1</a> |                                    |            |             |              |
| GI_7662329-S | 401.6  | 457.1  | 386.9 ABLIM3     | <a href="#">NM_014945.1</a> |                                    | actin      |             | cytoskelet   |
| GI_7662333-A | 102.5  | 112.6  | 102.3 RASGRP3    | <a href="#">NM_015376.1</a> | GRP3;KIAA0846                      | guanyl-    |             | small        |
| GI_7662339-S | 1504.6 | 1218   | 1388.4 KIAA0852  | <a href="#">NM_014941.1</a> |                                    |            |             |              |
| GI_7662345-S | 499.4  | 523.5  | 464 KIAA0863     | <a href="#">NM_014913.1</a> |                                    |            |             |              |
| GI_7662347-S | 465    | 755.1  | 491.8 MONDOA     | <a href="#">NM_014938.1</a> | MIR;KIAA0867                       |            |             |              |
| GI_7662357-S | 165.3  | 244.2  | 246.5 ENPP4      | <a href="#">NM_014936.1</a> |                                    |            |             |              |
| GI_7662367-S | 85.2   | 99.2   | 96.3 CNK2        | <a href="#">NM_014927.1</a> | KIAA0902                           | binding    | mitochond   | transport    |
| GI_7662371-S | 1007.6 | 1006.8 | 884.8 KIAA0907   | <a href="#">NM_014949.1</a> |                                    |            |             |              |
| GI_7662375-S | 322.7  | 361.6  | 333.2 FAM13A1    | <a href="#">NM_014883.1</a> |                                    |            |             |              |
| GI_7662391-S | 119.7  | 107.3  | 102.8 CPEB3      | <a href="#">NM_014912.1</a> | KIAA0940                           | nucleic    |             |              |
| GI_7662393-S | 523.5  | 427.4  | 457.7 Rab11-FIP2 | <a href="#">NM_014904.1</a> | nRip11;KIAA0941                    |            |             |              |
| GI_7662395-S | 480.1  | 664.5  | 567.2 EFA6R      | <a href="#">NM_015310.1</a> | HCA67;KIAA0942                     |            |             |              |
| GI_7662403-S | 108.7  | 107.1  | 94.4 CARD8       | <a href="#">NM_014959.1</a> | DACAR;NDPP1;TUCAN;CARDINAL;KIAA095 | apoptosis  | nucleus     | apoptosis    |
| GI_7662407-S | 171.8  | 212.7  | 175.2 ZFP30      | <a href="#">NM_014898.1</a> |                                    |            |             |              |
| GI_7662409-S | 236.7  | 280.9  | 270.9 KIAA0963   | <a href="#">NM_014963.1</a> |                                    |            |             |              |
| GI_7662415-S | 480.4  | 611.6  | 572 FRMPD1       | <a href="#">NM_014907.1</a> | FRMD2;KIAA0967                     | protein    | cytoskelet  | intracellula |
| GI_7662423-S | 146.9  | 174.2  | 165.1 KIAA0972   | <a href="#">NM_014930.1</a> |                                    |            |             |              |
| GI_7662425-S | 126.4  | 124.4  | 123.1 KIAA0976   | <a href="#">NM_014917.1</a> |                                    |            |             |              |
| GI_7662431-S | 170    | 184.3  | 173.9 RPH3A      | <a href="#">NM_014954.1</a> | KIAA0985;rabphilin                 | protein    | membran     | intracellula |

|              |        |        |        |          |                             |                          |            |                         |
|--------------|--------|--------|--------|----------|-----------------------------|--------------------------|------------|-------------------------|
| GI_7662439-S | 3694.3 | 4202.3 | 3918.8 | KIAA1001 | <a href="#">NM_014960.1</a> | ARSG                     | sulfuric   | metabolis               |
| GI_7662445-S | 263.9  | 305.8  | 317.2  | C6orf84  | <a href="#">NM_014895.1</a> |                          |            |                         |
| GI_7662449-S | 756.3  | 687.8  | 587.3  | KIAA1018 | <a href="#">NM_014967.1</a> |                          |            |                         |
| GI_7662451-S | 444.3  | 687    | 534.2  | AGTPBP1  | <a href="#">NM_015239.1</a> | NNA1;KIAA1035            | carboxype  | proteolysis             |
| GI_7662455-S | 1604.9 | 1502.9 | 1343.6 | KIAA1041 | <a href="#">NM_014947.1</a> |                          |            |                         |
| GI_7662457-S | 629.7  | 735.3  | 600.9  | OIP106   | <a href="#">NM_014965.1</a> |                          | protein    | kinesin protein         |
| GI_7662463-S | 423.5  | 388.6  | 391    | KIAA1052 | <a href="#">NM_014956.1</a> |                          |            |                         |
| GI_7662465-S | 122.7  | 151.8  | 116    | ZNF409   | <a href="#">NM_014894.1</a> |                          |            |                         |
| GI_7662473-S | 240.3  | 252.3  | 255.3  | KIAA1074 | <a href="#">NM_014915.1</a> |                          |            |                         |
| GI_7662479-S | 100.1  | 106.1  | 101.1  | KIAA1084 | <a href="#">NM_014910.1</a> |                          |            |                         |
| GI_7662489-S | 324    | 354.1  | 368.5  | KIAA1115 | <a href="#">NM_014931.1</a> |                          |            |                         |
| GI_7662491-S | 370    | 426.2  | 410.8  | RBM16    | <a href="#">NM_014892.1</a> |                          |            |                         |
| GI_7662501-S | 2746.2 | 3609.3 | 2956   | MCTS1    | <a href="#">NM_014060.1</a> | MCT-1                    | RNA        | positive                |
| GI_7662509-S | 736.8  | 895.2  | 777    | LEPROTL1 | <a href="#">NM_015344.1</a> | my047                    |            | integral to             |
| GI_7662517-S | 129.1  | 154.6  | 135    | SLC6A16  | <a href="#">NM_014037.1</a> | NTT5                     | neurotran  | intracellula neurotran  |
| GI_7662519-S | 146.5  | 152.9  | 149.9  | PRO0038  | <a href="#">NM_014113.1</a> |                          |            |                         |
| GI_7662525-S | 177.5  | 211.2  | 178.6  | PRO0132  | <a href="#">NM_014116.1</a> |                          |            |                         |
| GI_7662529-S | 92.5   | 95.7   | 91.5   | PRO0159  | <a href="#">NM_014118.1</a> |                          |            |                         |
| GI_7662535-S | 101.5  | 101.2  | 103.5  | PRO0233  | <a href="#">NM_014121.1</a> |                          |            |                         |
| GI_7662545-S | 292    | 377.5  | 327.6  | PRO0327  | <a href="#">NM_014125.1</a> |                          |            |                         |
| GI_7662547-S | 91.1   | 93     | 82     | PRO0365  | <a href="#">NM_014126.1</a> |                          |            |                         |
| GI_7662551-S | 148.3  | 164.9  | 152.2  | PRO0456  | <a href="#">NM_014127.1</a> |                          |            |                         |
| GI_7662559-S | 91.1   | 94.5   | 89     | PRO0478  | <a href="#">NM_014129.1</a> |                          |            |                         |
| GI_7662573-S | 100.9  | 110.7  | 90.6   | PRO0618  | <a href="#">NM_014133.1</a> |                          |            |                         |
| GI_7662575-S | 127.5  | 134    | 138    | PRO0628  | <a href="#">NM_014134.1</a> |                          |            |                         |
| GI_7662577-S | 139.8  | 165.3  | 162.5  | PRO0641  | <a href="#">NM_014135.1</a> |                          |            |                         |
| GI_7662610-S | 102.9  | 106.7  | 91.5   | PRO1768  | <a href="#">NM_014099.1</a> |                          |            |                         |
| GI_7662620-S | 88.9   | 91.5   | 85.9   | PRO1880  | <a href="#">NM_014104.1</a> |                          |            |                         |
| GI_7662624-S | 479.7  | 637.5  | 569.2  | PRO1914  | <a href="#">NM_014106.1</a> |                          |            |                         |
| GI_7662634-S | 89.6   | 96.3   | 86.2   | PRO2086  | <a href="#">NM_014111.1</a> |                          |            |                         |
| GI_7662646-S | 499.2  | 513.3  | 507.2  | PTDSS1   | <a href="#">NM_014754.1</a> | PSSA;KIAA0024            |            |                         |
| GI_7662650-S | 124.7  | 142.7  | 125.7  | RGC32    | <a href="#">NM_014059.1</a> |                          | cell cycle | cytoplasm regulation    |
| GI_7662654-S | 271.8  | 208    | 230    | SNX24    | <a href="#">NM_014035.1</a> | SBBI31                   | protein    | intracellula            |
| GI_7662658-S | 321.9  | 855.9  | 523.8  | SEC24D   | <a href="#">NM_014822.1</a> | KIAA0755                 |            |                         |
| GI_7662660-S | 374.3  | 482.2  | 445.5  | PSORS1C1 | <a href="#">NM_014068.1</a> | SEEK1;C6orf16            | copper,    | pathogene               |
| GI_7662662-S | 124.2  | 154.3  | 116.6  | C11orf21 | <a href="#">NM_014144.1</a> |                          |            |                         |
| GI_7662664-S | 332.2  | 397.2  | 362.7  | PSORS1C2 | <a href="#">NM_014069.1</a> | SPR1;C6orf17             | molecular  | cellular_co biological_ |
| GI_7662666-S | 277.9  | 332.7  | 308.5  | C6orf15  | <a href="#">NM_014070.1</a> | STG                      | molecular  | cellular_co biological_ |
| GI_7662670-S | 490.6  | 581    | 573.4  | TED      | <a href="#">NM_015686.1</a> |                          | transmem   | integral to developm    |
| GI_7662674-I | 143.4  | 138.8  | 151.4  | TP53TG3  | <a href="#">NM_015369.1</a> | TP53TG3A                 |            |                         |
| GI_7669471-I | 218.4  | 290.2  | 247.1  | ADAR     | <a href="#">NM_001111.2</a> | DSH;ADAR1;DRADA;DSRAD    | double-    | nucleus antimicrob      |
| GI_7669474-A | 3002.5 | 2919.3 | 2860.9 | ADAR     | <a href="#">NM_015841.1</a> | DSH;ADAR1;DRADA;DSRAD    | double-    | nucleus antimicrob      |
| GI_7669476-I | 152.9  | 163.6  | 152.6  | ADARB1   | <a href="#">NM_015833.1</a> | RED1;ADAR2;DRABA2;DRADA2 | adenosine  | nucleus RNA             |
| GI_7669478-A | 264.5  | 312.3  | 282.6  | ADARB1   | <a href="#">NM_015834.1</a> | RED1;ADAR2;DRABA2;DRADA2 | adenosine  | nucleus RNA             |

|              |         |        |        |          |                             |                                   |            |             |             |
|--------------|---------|--------|--------|----------|-----------------------------|-----------------------------------|------------|-------------|-------------|
| GI_7669480-S | 4634.1  | 5460.7 | 3014.6 | BNIP3    | <a href="#">NM_004052.2</a> | NIP3                              | apoptosis  | mitochond   | anti-       |
| GI_7669488-S | 490.8   | 398.6  | 418.7  | ECGF1    | <a href="#">NM_001953.2</a> | TP;PDEC GF;hPD-ECGF               | thymidine  | soluble     | pyrimidine  |
| GI_7669489-A | 958.8   | 973.2  | 888.7  | EWSR1    | <a href="#">NM_013986.1</a> | EWS                               | RNA        |             | oncogene    |
| GI_7669491-S | 24576.8 | 30700  | 24231  | GAPD     | <a href="#">NM_002046.2</a> | G3PD;GAPDH                        | glyceralde | cytoplasm   | glycolysis  |
| GI_7669493-A | 186.8   | 212.7  | 222.5  | GCDH     | <a href="#">NM_013976.1</a> | ACAD5                             | glutaryl-  | mitochond   | electron    |
| GI_7669495-S | 127.8   | 147.8  | 122.3  | GSTT2    | <a href="#">NM_000854.2</a> |                                   | glutathion |             |             |
| GI_7669496-S | 2089.9  | 2393.7 | 1821.7 | JWA      | <a href="#">NM_006407.2</a> | jmx;DERP11;HSPC127;GTRAP3-18      |            |             |             |
| GI_7669497-I | 119.8   | 109.3  | 114.5  | KLRD1    | <a href="#">NM_002262.2</a> | CD94                              | transmem   | integral to | cell        |
| GI_7669498-A | 95.5    | 97.7   | 96.6   | KLRD1    | <a href="#">NM_007334.1</a> | CD94                              | transmem   | integral to | cell        |
| GI_7669500-S | 7549    | 8030   | 7939.2 | LAMP1    | <a href="#">NM_005561.2</a> | LAMPA;CD107a;LGP120               |            | membran     |             |
| GI_7669502-I | 2237    | 2758.1 | 2381.2 | LAMP2    | <a href="#">NM_013995.1</a> | LAMPB;CD107b                      |            | lysosomal   |             |
| GI_7669505-S | 106     | 108.3  | 105.8  | MYH1     | <a href="#">NM_005963.2</a> | MYHa;MYHSA1;MyHC-2X/D             | muscle     | muscle      | striated    |
| GI_7669507-A | 193.9   | 209.3  | 203.4  | NOX1     | <a href="#">NM_013954.1</a> | MOX1;NOH1;NOH-1;GP91-2            | superoxid  | integral to | proton      |
| GI_7669517-I | 102.3   | 98.9   | 103.4  | NRG1     | <a href="#">NM_013959.1</a> | GGF;HGL;HRG;NDF;ARIA;GGF2;HRGA;SM |            |             |             |
| GI_7669519-I | 91.8    | 103    | 92.8   | NRG1     | <a href="#">NM_013960.1</a> | GGF;HGL;HRG;NDF;ARIA;GGF2;HRGA;SM |            |             |             |
| GI_7669521-A | 166.9   | 232.1  | 220.9  | NRG1     | <a href="#">NM_013961.1</a> | GGF;HGL;HRG;NDF;ARIA;GGF2;HRGA;SM |            |             |             |
| GI_7669523-I | 108.2   | 89.1   | 87.4   | NRG1     | <a href="#">NM_013962.1</a> | GGF;HGL;HRG;NDF;ARIA;GGF2;HRGA;SM |            |             |             |
| GI_7669535-A | 112.6   | 100    | 115.9  | NRG2     | <a href="#">NM_013985.1</a> | NTAK;Don-1                        | receptor   | integral to | anti-       |
| GI_7669539-A | 168.4   | 185    | 157.2  | PARK2    | <a href="#">NM_013988.1</a> | PDJ;PRKN;AR-JP                    | ubiquitin- |             | central     |
| GI_7669544-I | 198.8   | 250.6  | 233.9  | TACR1    | <a href="#">NM_001058.2</a> | SPR;NK1R;NKIR;TAC1R               | tachykinin | integral to | tachykinin  |
| GI_7669545-A | 99.4    | 101.6  | 89.9   | TACR1    | <a href="#">NM_015727.1</a> | SPR;NK1R;NKIR;TAC1R               | tachykinin | integral to | tachykinin  |
| GI_7669545-I | 88.3    | 109.4  | 89.8   | TACR1    | <a href="#">NM_015727.1</a> | SPR;NK1R;NKIR;TAC1R               | tachykinin | integral to | tachykinin  |
| GI_7669547-S | 94.9    | 96.1   | 85.2   | TACR3    | <a href="#">NM_001059.1</a> | NK3R;TAC3RL                       | tachykinin | integral to | tachykinin  |
| GI_7669549-I | 103.1   | 100.3  | 93.6   | VCL      | <a href="#">NM_014000.1</a> |                                   | structural | cytoskelet  | cell shape  |
| GI_7669551-A | 3522.5  | 3037.5 | 1864.7 | VCL      | <a href="#">NM_003373.2</a> |                                   | structural | cytoskelet  | cell shape  |
| GI_7669552-S | 704.3   | 1433.7 | 1401.1 | VCP      | <a href="#">NM_007126.2</a> | p97;TERA                          | nucleotide | Golgi       | transport   |
| GI_7669553-S | 235.5   | 278.7  | 249.3  | AMMECR1  | <a href="#">NM_015365.1</a> | AMMERC1                           | molecular  | cellular_co | biological_ |
| GI_7705267-S | 1221.9  | 1321.6 | 1211.9 | FAM8A1   | <a href="#">NM_016255.1</a> | AHCP                              | DNA        | nucleus     | regulation  |
| GI_7705283-S | 288.2   | 263.3  | 272    | ANAPC7   | <a href="#">NM_016238.1</a> | APC7                              |            | anaphase-   | regulation  |
| GI_7705287-A | 604.2   | 731.2  | 799.9  | APRIN    | <a href="#">NM_015928.1</a> | AS3;CG008;FLJ23236;KIAA0979       | ATP        | nucleus     | negative    |
| GI_7705287-I | 74.1    | 78.8   | 66.8   | APRIN    | <a href="#">NM_015928.1</a> | AS3;CG008;FLJ23236;KIAA0979       | ATP        | nucleus     | negative    |
| GI_7705295-A | 145.8   | 173.1  | 168.7  | BIN2     | <a href="#">NM_016187.1</a> | BRAP-1                            |            |             |             |
| GI_7705299-S | 402.4   | 375.7  | 371.8  | BM-002   | <a href="#">NM_016617.1</a> |                                   |            |             |             |
| GI_7705301-S | 97.2    | 113.8  | 107.1  | KIAA1221 | <a href="#">NM_016620.1</a> | BM-                               |            |             |             |
| GI_7705307-S | 110.6   | 107.2  | 113.5  | GDF2     | <a href="#">NM_016204.1</a> | BMP9;BMP-9                        | cytokine   | extracellul | cell growth |
| GI_7705311-I | 126.8   | 118.6  | 126.4  | CABP2    | <a href="#">NM_016366.1</a> |                                   | calcium    |             | signal      |
| GI_7705315-S | 94.2    | 115.1  | 89     | GPR2     | <a href="#">NM_016602.1</a> | CCR10                             | G-protein  | integral to | G-protein   |
| GI_7705317-S | 231.4   | 228    | 326.4  | GULP1    | <a href="#">NM_016315.1</a> | CED6;GULP;CED-6                   | signal     |             | phagocyto   |
| GI_7705321-I | 116.2   | 125.3  | 113.2  | C1orf9   | <a href="#">NM_016227.1</a> | CH1                               |            |             |             |
| GI_7705327-S | 102.9   | 105    | 94.6   | CML2     | <a href="#">NM_016347.1</a> |                                   | N-         |             |             |
| GI_7705329-S | 978.3   | 1045.9 | 1028   | COPS7A   | <a href="#">NM_016319.1</a> |                                   |            |             |             |
| GI_7705343-S | 343.6   | 328.6  | 341.5  | POLK     | <a href="#">NM_016218.1</a> | DINP;POLQ;DINB1                   |            |             | mutagene    |
| GI_7705345-S | 406.5   | 435.6  | 437.5  | KIAA0683 | <a href="#">NM_016111.1</a> | DKFZp434A073                      |            |             |             |
| GI_7705347-S | 492.9   | 480    | 537    | MPHOSPH1 | <a href="#">NM_016195.1</a> | MPP1;KRMP1;MPP-1;DKFZP434B0435    | cell cycle | kinesin     | M phase     |

|              |        |        |        |          |                             |                                   |             |             |             |
|--------------|--------|--------|--------|----------|-----------------------------|-----------------------------------|-------------|-------------|-------------|
| GI_7705364-A | 171.6  | 239.6  | 232.8  | RBM19    | <a href="#">NM_016196.1</a> | NPO;KIAA0682;DKFZp586F1023        | nucleic     |             |             |
| GI_7705364-I | 288.5  | 329.6  | 342.8  | RBM19    | <a href="#">NM_016196.1</a> | NPO;KIAA0682;DKFZp586F1023        | nucleic     |             |             |
| GI_7705372-S | 2377.1 | 2806   | 2127.2 | EPLIN    | <a href="#">NM_016357.1</a> | SREBP3                            |             | focal       |             |
| GI_7705378-S | 1248.8 | 377.4  | 329.3  | GAGE8    | <a href="#">NM_012196.1</a> |                                   | tumor       |             | cellular    |
| GI_7705380-S | 2003.1 | 2187.6 | 2359.5 | UBADC1   | <a href="#">NM_016172.1</a> | GBDR1                             |             |             |             |
| GI_7705386-I | 123.5  | 139.8  | 122.5  | GTF2IRD1 | <a href="#">NM_016328.1</a> | GTF3;RBAP2;CREAM1;MUSTRD1;WBSCR1  | transcripti | nucleus     | regulation  |
| GI_7705388-S | 147.4  | 185.8  | 148.1  | H-plk    | <a href="#">NM_015852.1</a> |                                   | molecular   | nucleus     | biological_ |
| GI_7705392-S | 250.4  | 296.4  | 265    | HAO2     | <a href="#">NM_016527.1</a> | HAOX2                             | (S)-2-      | peroxisom   | electron    |
| GI_7705396-S | 344.8  | 333.6  | 324.7  | VPS54    | <a href="#">NM_016516.1</a> | HCC8;SLP-8p;VPS54L                |             |             |             |
| GI_7705400-S | 1081.2 | 1115.9 | 1031.5 | HDCMA18P | <a href="#">NM_016648.1</a> | DKFZP564K112                      |             |             |             |
| GI_7705408-S | 114.1  | 129.1  | 100.1  | HEMK     | <a href="#">NM_016173.1</a> |                                   | N-          |             | DNA         |
| GI_7705410-S | 1604   | 1968   | 1513.9 | HGRG8    | <a href="#">NM_016258.1</a> |                                   | tumor       |             | humoral     |
| GI_7705416-S | 269.9  | 315.1  | 273    | HP1-BP74 | <a href="#">NM_016287.1</a> | HP1BP3                            | DNA         | nucleus     | nucleoso    |
| GI_7705420-S | 658.8  | 780.7  | 642.5  | HSD17B7  | <a href="#">NM_016371.1</a> | PRAP                              | estradiol   |             |             |
| GI_7705430-S | 1892.9 | 1898   | 1622.2 | HSPC016  | <a href="#">NM_015933.1</a> |                                   |             |             |             |
| GI_7705432-S | 12640  | 11041  | 9290   | EIF3S6IP | <a href="#">NM_016091.1</a> | HSPC021;HSPC025                   | translation |             | protein     |
| GI_7705458-S | 201.1  | 219.5  | 201.8  | HSPC121  | <a href="#">NM_016395.1</a> | B-IND1                            | GTPase      |             | NIK-I-      |
| GI_7705460-S | 263.8  | 288.8  | 284.2  | HSPC129  | <a href="#">NM_016396.1</a> | HSPC058                           |             |             |             |
| GI_7705474-S | 1293.7 | 1307.1 | 1154.7 | HSPC148  | <a href="#">NM_016403.1</a> |                                   |             |             |             |
| GI_7705476-S | 9526.7 | 10087  | 9070   | HSPC152  | <a href="#">NM_016404.1</a> |                                   |             |             |             |
| GI_7705480-S | 1614.6 | 1727.7 | 1611.4 | HSPC155  | <a href="#">NM_016406.1</a> |                                   | ubiquitin   |             | ubiquitin   |
| GI_7705482-S | 2838.1 | 3166.3 | 3309.6 | C20orf43 | <a href="#">NM_016407.1</a> | CDAO5;HSPC164                     |             |             |             |
| GI_7705544-S | 160.1  | 177.8  | 162.5  | HUMCYT2A | <a href="#">NM_015848.1</a> |                                   | structural  | kinesin     | cytoskelet  |
| GI_7705552-S | 255.8  | 338.8  | 291.9  | IHPK2    | <a href="#">NM_016291.1</a> | IP6K2;DKFZP586M0617               | polyphosp   |             |             |
| GI_7705554-S | 131    | 146.7  | 144.5  | IRX4     | <a href="#">NM_016358.1</a> |                                   | transcripti | nucleus     | heart       |
| GI_7705567-I | 148.9  | 179.3  | 149.8  | KIR2DL3  | <a href="#">NM_015868.1</a> | p58;CL-                           | receptor    | integral to | immune      |
| GI_7705573-S | 96.7   | 100.1  | 91.6   | KLRF1    | <a href="#">NM_016523.1</a> |                                   | transmem    | integral to | cell        |
| GI_7705575-S | 709.2  | 714.8  | 826.2  | RAMP     | <a href="#">NM_016448.1</a> | L2DTL                             |             |             |             |
| GI_7705579-A | 2112.2 | 2107.7 | 2344.1 | LCMT1    | <a href="#">NM_016309.1</a> | LCMT;CGI-68                       | S-          |             | protein     |
| GI_7705581-S | 101.6  | 113    | 95.7   | GLULD1   | <a href="#">NM_016571.1</a> | LGS                               | glutamate-  |             | nitrogen    |
| GI_7705589-S | 773.8  | 856.6  | 650.8  | CGI-121  | <a href="#">NM_016058.1</a> |                                   |             |             |             |
| GI_7705591-S | 115    | 121.5  | 106.9  | CGI-125  | <a href="#">NM_016060.1</a> |                                   |             | nucleus     | regulation  |
| GI_7705601-S | 1125.7 | 1161   | 1043.1 | ASCC1    | <a href="#">NM_015947.1</a> | CGI-18;ASC1p50                    | nucleic     |             |             |
| GI_7705605-S | 2507.1 | 2104.2 | 1963.2 | RRP40    | <a href="#">NM_016042.1</a> |                                   | exonuclea   | nuclear     | rRNA        |
| GI_7705607-S | 1308.7 | 1114.9 | 1138.9 | CGI-105  | <a href="#">NM_016044.1</a> |                                   | catalytic   |             | metabolis   |
| GI_7705609-S | 237.3  | 198.7  | 216.5  | C20orf45 | <a href="#">NM_016045.1</a> | dJ543J19.5                        |             |             |             |
| GI_7705613-S | 595.9  | 430.9  | 541.6  | CGI-111  | <a href="#">NM_016048.1</a> |                                   | catalytic   |             | metabolis   |
| GI_7705621-S | 1351.2 | 1392.6 | 1391.7 | CGI-116  | <a href="#">NM_016053.1</a> |                                   |             |             |             |
| GI_7705623-S | 3265.9 | 2294.1 | 1723.6 | C6orf74  | <a href="#">NM_016063.1</a> | CGI-130;NS5ATP2;dJ167O5.2         |             |             |             |
| GI_7705629-S | 1835.1 | 1782   | 1576.8 | MRPS18C  | <a href="#">NM_016067.1</a> | CGI-134;FLJ11146;FLJ22967;MRPS18- | structural  | ribosome    | protein     |
| GI_7705631-S | 3644.2 | 4832.5 | 5681.7 | TTC11    | <a href="#">NM_016068.1</a> | Fis1;CGI-135                      |             |             |             |
| GI_7705637-S | 347    | 422.1  | 412.4  | CGI-143  | <a href="#">NM_016074.1</a> |                                   | transcripti |             |             |
| GI_7705639-S | 476.1  | 514.1  | 460.1  | C13orf9  | <a href="#">NM_016075.1</a> | CGI-145                           |             |             |             |
| GI_7705643-S | 109.7  | 99.5   | 98.9   | FAM18B   | <a href="#">NM_016078.1</a> | CGI-148;YDR084C                   |             | integral to |             |

|              |        |        |        |           |                             |                                      |                                   |
|--------------|--------|--------|--------|-----------|-----------------------------|--------------------------------------|-----------------------------------|
| GI_7705647-S | 101.2  | 128.9  | 102.9  | ELA2B     | <a href="#">NM_015849.1</a> | pancreatic extracellul               | proteolysis                       |
| GI_7705655-S | 219.9  | 267.4  | 258.2  | LOC51036  | <a href="#">NM_015854.1</a> | retinoic nucleus                     | regulation                        |
| GI_7705663-S | 270    | 321.9  | 300.5  | ZFP67     | <a href="#">NM_015872.1</a> | c-Krox;hcKrox                        | ectoderm                          |
| GI_7705667-S | 102.8  | 96.2   | 100.7  | SIAT8C    | <a href="#">NM_015879.1</a> | ST8SialIII;ST8Sia III                | sialyltransf Golgi oligosacch     |
| GI_7705673-S | 103.6  | 105.1  | 89.8   | LOC51049  | <a href="#">NM_015883.1</a> |                                      |                                   |
| GI_7705675-S | 104.4  | 106.8  | 103.7  | PI15      | <a href="#">NM_015886.1</a> | P24TI;P25TI                          | endopepti extracellul biological_ |
| GI_7705679-S | 92.6   | 93.2   | 82.6   | PRH       | <a href="#">NM_015893.1</a> |                                      | peptide                           |
| GI_7705683-S | 449    | 395.8  | 418.7  | LOC51054  | <a href="#">NM_015899.1</a> |                                      |                                   |
| GI_7705703-S | 1513.3 | 1426.6 | 1357.4 | LOC51064  | <a href="#">NM_015917.1</a> | GSTK1                                | glutathion mitochond              |
| GI_7705707-S | 90.4   | 107.6  | 109.6  | LOC51066  | <a href="#">NM_015931.1</a> |                                      | electron electron                 |
| GI_7705709-S | 539.8  | 610.8  | 541.7  | CGI-04    | <a href="#">NM_015936.1</a> |                                      | ATP tyrosyl-                      |
| GI_7705717-S | 2978.5 | 3237.4 | 2801.4 | CGI-26    | <a href="#">NM_015954.1</a> |                                      | deoxyribo                         |
| GI_7705723-S | 793.3  | 869.7  | 796.3  | MMRP19    | <a href="#">NM_015957.1</a> |                                      |                                   |
| GI_7705725-S | 1694.1 | 1944.7 | 1782.3 | TMX2      | <a href="#">NM_015959.1</a> | CGI-31                               | electron nucleus electron         |
| GI_7705727-S | 677.3  | 564.9  | 554.3  | CGI-32    | <a href="#">NM_015960.1</a> |                                      |                                   |
| GI_7705729-S | 300.4  | 282    | 245.9  | C14orf111 | <a href="#">NM_015962.1</a> | CGI-35                               |                                   |
| GI_7705739-S | 5939.6 | 3846.3 | 3028.7 | POLR1D    | <a href="#">NM_015972.1</a> | RPA9;RPA16;RPAC2;RPO1-3              | DNA- nucleus transcripti          |
| GI_7705743-S | 280.2  | 222.5  | 172.6  | CRYL1     | <a href="#">NM_015974.1</a> |                                      | oxidoredu fatty acid              |
| GI_7705747-S | 86     | 93.2   | 84.8   | TNNI3K    | <a href="#">NM_015978.1</a> | CARK                                 | protein- protein                  |
| GI_7705750-S | 153.9  | 177.1  | 167.7  | YBX2      | <a href="#">NM_015982.1</a> | MSY2;MGC45104                        | RNA cytoplasm translation         |
| GI_7705752-S | 173.3  | 196.4  | 174    | C1QA      | <a href="#">NM_015991.1</a> |                                      | compleme compleme compleme        |
| GI_7705754-S | 191.5  | 241.2  | 212.5  | TM4SF11   | <a href="#">NM_015993.1</a> | PLL;PMLP                             |                                   |
| GI_7705756-S | 899.1  | 1513.8 | 1054.9 | CGI-40    | <a href="#">NM_015996.1</a> |                                      |                                   |
| GI_7705764-S | 866.5  | 793.7  | 878.8  | CGI-48    | <a href="#">NM_016001.1</a> |                                      | DNA nucleus regulation            |
| GI_7705766-S | 478.1  | 390.4  | 340.8  | CGI-49    | <a href="#">NM_016002.1</a> |                                      |                                   |
| GI_7705768-S | 469.7  | 532.2  | 597    | C20orf9   | <a href="#">NM_016004.1</a> | NGD5;CGI-53;dJ1028D15.1              |                                   |
| GI_7705774-S | 181    | 191.5  | 159.3  | CGI-62    | <a href="#">NM_016010.1</a> |                                      |                                   |
| GI_7705776-S | 1124.4 | 1099.9 | 825.9  | CGI-63    | <a href="#">NM_016011.1</a> | NRBF1                                | alcohol                           |
| GI_7705778-S | 638.2  | 924    | 729.4  | NDUFAF1   | <a href="#">NM_016013.1</a> | CGI65;CIA30;CGI-65                   | chaperone mitochond               |
| GI_7705780-S | 238.4  | 294.6  | 269.9  | C9orf77   | <a href="#">NM_016014.1</a> | CGI-67                               | catalytic                         |
| GI_7705784-S | 745    | 635.1  | 477.5  | TFB1M     | <a href="#">NM_016020.1</a> | CGI75;mtTFB;CGI-75                   | rRNA rRNA                         |
| GI_7705786-S | 1991   | 2175.5 | 1867.7 | APH-1A    | <a href="#">NM_016022.1</a> | APH1A;CGI-78                         | Golgi                             |
| GI_7705792-S | 987.5  | 761.4  | 845.5  | LACTB2    | <a href="#">NM_016027.1</a> | CGI-83                               |                                   |
| GI_7705800-S | 99.8   | 109.8  | 104.1  | ZDHHC9    | <a href="#">NM_016032.1</a> | CGI-89;ZNF379                        | zinc ion integral to regulation   |
| GI_7705802-S | 1341.7 | 1565.3 | 1180.5 | CGI-90    | <a href="#">NM_016033.1</a> |                                      |                                   |
| GI_7705806-S | 539.2  | 557.1  | 611.5  | COQ4      | <a href="#">NM_016035.1</a> | CGI-92                               | ubiquinon                         |
| GI_7705808-S | 1896.7 | 2534   | 2154   | CGI-94    | <a href="#">NM_016037.1</a> |                                      | nucleus rRNA                      |
| GI_7705814-S | 100.8  | 95.1   | 81     | COMMD2    | <a href="#">NM_016094.1</a> | HSPC042;MGC57611                     |                                   |
| GI_7705816-S | 2024.7 | 2102   | 1756   | LOC51123  | <a href="#">NM_016096.1</a> |                                      |                                   |
| GI_7705820-S | 1484.4 | 1624.1 | 1541.2 | GOLGA7    | <a href="#">NM_016099.1</a> | GCP16;HSPC041;GOLGA3AP1              |                                   |
| GI_7705824-S | 190    | 250.8  | 201.3  | TRIM17    | <a href="#">NM_016102.1</a> | RBCC;terf;RNF16                      | zinc ion intracellula biological_ |
| GI_7705832-S | 777.5  | 958.7  | 666.2  | PHF11     | <a href="#">NM_016119.1</a> | APY;BCAP;IGEL;IGER;IGHER;NYREN34;NY- | DNA nucleus regulation            |
| GI_7705838-S | 198.3  | 203.4  | 198.1  | NY-REN-58 | <a href="#">NM_016122.1</a> |                                      |                                   |
| GI_7705840-S | 183.3  | 185.4  | 184.4  | IRAK4     | <a href="#">NM_016123.1</a> | REN64;NY-REN-64                      | tumor protein                     |

|              |        |        |        |            |                             |                                      |             |                         |
|--------------|--------|--------|--------|------------|-----------------------------|--------------------------------------|-------------|-------------------------|
| GI_7705852-S | 374.3  | 392.3  | 347.6  | DNCLI1     | <a href="#">NM_016141.1</a> |                                      | small       | small                   |
| GI_7705854-S | 2411.6 | 2446.4 | 2070   | HSD17B12   | <a href="#">NM_016142.1</a> | KAR                                  | oxidoredu   | metabolis               |
| GI_7705856-S | 260.5  | 282.5  | 242    | LOC51145   | <a href="#">NM_016158.1</a> |                                      | DNA         | integral to regulation  |
| GI_7705858-S | 148.6  | 160.7  | 154.2  | alpha4GnT  | <a href="#">NM_016161.1</a> |                                      | acetylgluc  | Golgi O-linked          |
| GI_7705864-S | 115    | 118.3  | 109.9  | LOC51149   | <a href="#">NM_016175.1</a> |                                      |             |                         |
| GI_7705870-S | 91.3   | 99.6   | 94.7   | LOC51152   | <a href="#">NM_016181.1</a> |                                      |             |                         |
| GI_7705876-S | 4197   | 5686.2 | 4302.8 | HN1        | <a href="#">NM_016185.1</a> |                                      |             |                         |
| GI_7705878-S | 96     | 111.9  | 119.8  | SERPINA10  | <a href="#">NM_016186.1</a> | PZI;ZPI;CENTERIN                     | serpin      |                         |
| GI_7705880-S | 3060.9 | 3225.9 | 3715.8 | ZNF580     | <a href="#">NM_016202.1</a> |                                      | DNA         | nucleus regulation      |
| GI_7705882-S | 144.1  | 153.2  | 146.3  | LOC51159   | <a href="#">NM_016206.1</a> |                                      |             |                         |
| GI_7705890-S | 317.7  | 344.3  | 337.4  | DBR1       | <a href="#">NM_016216.1</a> |                                      | hydrolase   |                         |
| GI_7705904-S | 1088   | 1070.5 | 649.6  | DHRS8      | <a href="#">NM_016245.1</a> | PAN1B;RETSDR2                        | oxidoredu   | metabolis               |
| GI_7705906-S | 139.9  | 143.7  | 116.1  | DHRS10     | <a href="#">NM_016246.1</a> | retSDR3                              | oxidoredu   | metabolis               |
| GI_7705908-S | 473.2  | 590.7  | 556.5  | NAGPA      | <a href="#">NM_016256.1</a> | UCE;APAA                             | N-          | integral to lysosome    |
| GI_7705910-S | 104.2  | 98.9   | 99.1   | ZNFN1A2    | <a href="#">NM_016260.1</a> | HELIOS;ZNF1A2                        |             |                         |
| GI_7705912-S | 244.1  | 300.9  | 271.7  | TUBD1      | <a href="#">NM_016261.1</a> | TUBD                                 | structural  | centriole microtubul    |
| GI_7705930-S | 138.2  | 209.9  | 127.9  | CEB1       | <a href="#">NM_016323.1</a> |                                      | ubiquitin-  | intracellula regulation |
| GI_7705934-S | 136.9  | 145.4  | 127.9  | ANC_2H01   | <a href="#">NM_016331.1</a> | ZASC1                                |             |                         |
| GI_7705938-S | 529.8  | 665.6  | 558.3  | RAPGEFL1   | <a href="#">NM_016339.1</a> | Link-GEFII                           | guanyl-     | membran G-protein       |
| GI_7705942-A | 131.5  | 483.5  | 315.7  | C5orf4     | <a href="#">NM_016348.1</a> | FLJ13758                             |             |                         |
| GI_7705942-I | 270.9  | 332.4  | 305    | C5orf4     | <a href="#">NM_016348.1</a> | FLJ13758                             |             |                         |
| GI_7705944-S | 131.5  | 113.9  | 101.8  | LOC51198   | <a href="#">NM_016349.1</a> |                                      |             |                         |
| GI_7705950-I | 775.5  | 790.4  | 1086.6 | NUSAP1     | <a href="#">NM_016359.1</a> | LNP;ANKT;SAPL;BM037;Q0310;FLJ13421;P |             |                         |
| GI_7705960-S | 101.8  | 101.9  | 103.8  | CLDN18     | <a href="#">NM_016369.1</a> |                                      | structural  | tight                   |
| GI_7705962-S | 119.1  | 113.5  | 118.3  | RAB9B      | <a href="#">NM_016370.1</a> | RAB9L                                | GTP         | Golgi small             |
| GI_7705964-S | 662.7  | 738.7  | 726    | TPRA40     | <a href="#">NM_016372.1</a> |                                      | G-protein   | integral to aging       |
| GI_7705968-S | 86.8   | 92.9   | 92     | LOC51212   | <a href="#">NM_016380.1</a> |                                      |             |                         |
| GI_7705970-S | 135.9  | 164.9  | 163.5  | HOM-TES-85 | <a href="#">NM_016383.1</a> |                                      |             |                         |
| GI_7705972-S | 101.6  | 112    | 113.7  | IGF2AS     | <a href="#">NM_016412.1</a> | PEG8                                 | DNA         | nucleus regulation      |
| GI_7705974-S | 215.7  | 230.3  | 216.2  | ZNF219     | <a href="#">NM_016423.1</a> | ZFP219                               | transcripti | nucleus transcripti     |
| GI_7705982-S | 367.3  | 541.4  | 392.3  | COPZ2      | <a href="#">NM_016429.1</a> |                                      | protein     | Golgi cis- intracellula |
| GI_7705994-S | 120.5  | 138.4  | 119.9  | LOC51233   | <a href="#">NM_016449.1</a> |                                      |             |                         |
| GI_7706060-S | 99.7   | 110.4  | 119.6  | CLEC2      | <a href="#">NM_016509.1</a> |                                      | transmem    | integral to defense     |
| GI_7706064-S | 101    | 113    | 104.5  | PIPOX      | <a href="#">NM_016518.1</a> | LPIPOX                               | sarcosine   | peroxisom tetrahydrof   |
| GI_7706082-S | 529.4  | 876    | 635.6  | C1RL       | <a href="#">NM_016546.1</a> | C1RL1;C1r-LP                         | trypsin     | proteolysis             |
| GI_7706086-I | 122    | 132.4  | 114.3  | ANKMY1     | <a href="#">NM_016552.1</a> | ZMYND13;FLJ20499                     |             |                         |
| GI_7706090-S | 857.4  | 978.7  | 1109.7 | BFAR       | <a href="#">NM_016561.1</a> | BAR;RNF47                            | apoptosis   | membran anti-           |
| GI_7706098-S | 426.5  | 564.5  | 443.2  | E2IG2      | <a href="#">NM_016565.1</a> |                                      |             |                         |
| GI_7706102-S | 160.3  | 161.8  | 154.8  | SALPR      | <a href="#">NM_016568.1</a> |                                      | G-protein   | integral to G-protein   |
| GI_7706104-S | 611.9  | 775.9  | 695.3  | PTX1       | <a href="#">NM_016570.1</a> | CDA14;cd002                          |             |                         |
| GI_7706106-S | 250.9  | 294.9  | 330.5  | GMIP       | <a href="#">NM_016573.1</a> |                                      | oxidoredu   | metabolis               |
| GI_7706110-S | 804.6  | 602.8  | 317.9  | 8D6A       | <a href="#">NM_016579.1</a> | 8D6                                  |             | positive                |
| GI_7706116-S | 111.8  | 122.1  | 97.2   | SLC15A3    | <a href="#">NM_016582.1</a> | PHT2;PTR3;hPTR3                      | transporte  | membran oligopepti      |
| GI_7706124-S | 5623.3 | 6386.3 | 5262.1 | C3orf1     | <a href="#">NM_016589.1</a> |                                      | protein     | mitochond protein       |

|              |        |        |        |            |                             |                                   |             |                      |
|--------------|--------|--------|--------|------------|-----------------------------|-----------------------------------|-------------|----------------------|
| GI_7706126-S | 130.2  | 127    | 115.8  | C2GNT3     | <a href="#">NM_016591.1</a> | N-                                | membran     | O-linked             |
| GI_7706130-S | 298    | 396.8  | 304.6  | FKBP11     | <a href="#">NM_016594.1</a> | FKBP19                            | cyclophilin | protein              |
| GI_7706132-S | 646.3  | 751    | 637.8  | ZDHHC3     | <a href="#">NM_016598.1</a> | GODZ;ZNF373                       | zinc ion    | Golgi regulation     |
| GI_7706136-S | 320.5  | 297.3  | 292.5  | C5orf5     | <a href="#">NM_016603.1</a> | N61;KHCHP                         | GTPase      |                      |
| GI_7706138-S | 2458   | 2167   | 2223.7 | C5orf6     | <a href="#">NM_016605.1</a> |                                   | nucleus     |                      |
| GI_7706142-S | 804.9  | 621.5  | 640.3  | ALEX1      | <a href="#">NM_016608.1</a> |                                   |             |                      |
| GI_7706149-A | 1726   | 1446.6 | 1357.4 | MSCP       | <a href="#">NM_016612.1</a> | MSC;HT015;PRO1278;PRO1584         |             |                      |
| GI_7706155-S | 348.9  | 401.9  | 226    | LOC51315   | <a href="#">NM_016618.1</a> |                                   |             |                      |
| GI_7706157-S | 137.7  | 257.7  | 121.5  | PLAC8      | <a href="#">NM_016619.1</a> | C15                               |             |                      |
| GI_7706177-S | 139.5  | 169.4  | 153.3  | LOC51326   | <a href="#">NM_016632.1</a> |                                   |             |                      |
| GI_7706179-S | 218.4  | 251.5  | 241.9  | ERAF       | <a href="#">NM_016633.1</a> | AHSP;EDRF                         | chaperone   | hemoglobi hemopoie   |
| GI_7706183-I | 1669.7 | 1657.7 | 1533.2 | ARL6IP4    | <a href="#">NM_016638.1</a> | SR-25;SRp25                       | nucleus     | RNA                  |
| GI_7706185-S | 2153.7 | 1383.5 | 1812.8 | TNFRSF12A  | <a href="#">NM_016639.1</a> | FN14;TWEAKR                       | receptor    | integral to cell     |
| GI_7706189-S | 403.4  | 511.4  | 405.8  | SPTBN5     | <a href="#">NM_016642.1</a> | BSPECV;HUSPECV;HUBSPECV           | actin       | spectrin actin       |
| GI_7706191-S | 126.5  | 158.1  | 136.8  | LOC51333   | <a href="#">NM_016643.1</a> |                                   |             |                      |
| GI_7706193-S | 452.4  | 515.9  | 443.7  | LOC51334   | <a href="#">NM_016644.1</a> |                                   |             |                      |
| GI_7706195-S | 3248.9 | 2345.2 | 2395.3 | NEUGRIN    | <a href="#">NM_016645.1</a> |                                   | molecular   | nucleus neuron       |
| GI_7706197-S | 92.6   | 104.3  | 88.4   | LOC51336   | <a href="#">NM_016646.1</a> |                                   |             |                      |
| GI_7706199-S | 1986.5 | 1905.6 | 2745.8 | LOC51337   | <a href="#">NM_016647.1</a> |                                   |             |                      |
| GI_7706243-S | 6045.7 | 5565.4 | 6736.8 | C6orf82    | <a href="#">NM_015921.1</a> | CUTA                              |             |                      |
| GI_7706261-S | 1581.6 | 2112.2 | 2332.3 | ATP6V1H    | <a href="#">NM_015941.1</a> | SFD;VMA13;CGI-11;SFDbeta;SFDalpha |             |                      |
| GI_7706269-S | 2953.5 | 2773.6 | 2367.8 | RWDD1      | <a href="#">NM_015952.1</a> | PTD013                            |             |                      |
| GI_7706271-S | 3059.6 | 2239.7 | 1717.1 | CGI-30     | <a href="#">NM_015958.1</a> |                                   |             |                      |
| GI_7706275-A | 226.2  | 256.7  | 150.7  | CGI-38     | <a href="#">NM_015964.1</a> |                                   |             |                      |
| GI_7706293-A | 1240.2 | 1356.4 | 1501.5 | DKFZP434J1 | <a href="#">NM_016003.1</a> | CGI-50;FLJ12979;FLJ14217          |             |                      |
| GI_7706293-I | 89.3   | 94.9   | 95.6   | DKFZP434J1 | <a href="#">NM_016003.1</a> | CGI-50;FLJ12979;FLJ14217          |             |                      |
| GI_7706305-S | 3944.2 | 3660.1 | 3827.7 | CGI-69     | <a href="#">NM_016016.1</a> |                                   | binding     | mitochond transport  |
| GI_7706309-S | 161    | 156.9  | 201.1  | LUC7L2     | <a href="#">NM_016019.1</a> | CGI-59;CGI-74                     |             |                      |
| GI_7706315-S | 882.5  | 1065.8 | 952    | CGI-79     | <a href="#">NM_016024.1</a> |                                   | RNA         |                      |
| GI_7706317-S | 1927.4 | 2195   | 1366.2 | DHRS7      | <a href="#">NM_016029.1</a> | retDSR4;retSDR4                   | oxidoredu   | metabolis            |
| GI_7706321-S | 3034.2 | 3042.9 | 2779.8 | C14orf166  | <a href="#">NM_016039.1</a> | CGI-99                            |             |                      |
| GI_7706334-S | 835.9  | 964    | 887.5  | CGI-119    | <a href="#">NM_016056.1</a> |                                   |             |                      |
| GI_7706336-S | 1472.9 | 1924.3 | 1818.9 | COPZ1      | <a href="#">NM_016057.1</a> | COPZ;CGI-120                      | protein     | membran intracellula |
| GI_7706340-S | 1912.5 | 1681.8 | 1494.9 | CGI-127    | <a href="#">NM_016061.1</a> |                                   |             |                      |
| GI_7706342-S | 2544.4 | 2726.9 | 3172.7 | CGI-128    | <a href="#">NM_016062.1</a> |                                   |             |                      |
| GI_7706350-S | 1334   | 1425.2 | 1039.8 | CGI-147    | <a href="#">NM_016077.1</a> |                                   |             | integral to          |
| GI_7706352-S | 872    | 1073.2 | 1121.1 | VPS24      | <a href="#">NM_016079.1</a> | 25.1;NEDF;CGI-149                 | molecular   |                      |
| GI_7706366-S | 832.4  | 913.3  | 1249.6 | Pfs2       | <a href="#">NM_016095.1</a> | HSPC037                           |             | nucleus DNA          |
| GI_7706368-S | 1170.1 | 906.8  | 1082   | BRP44L     | <a href="#">NM_016098.1</a> | CGI-129;dJ68L15.3                 | molecular   |                      |
| GI_7706378-A | 133.5  | 136    | 150.1  | ASB4       | <a href="#">NM_016116.1</a> | ASB-4                             |             |                      |
| GI_7706378-I | 94.8   | 99.3   | 98.1   | ASB4       | <a href="#">NM_016116.1</a> | ASB-4                             |             |                      |
| GI_7706382-S | 637.1  | 642.8  | 722.4  | LOC51668   | <a href="#">NM_016126.1</a> |                                   |             |                      |
| GI_7706422-S | 1754.1 | 1580   | 1354.8 | LSM7       | <a href="#">NM_016199.1</a> | YNL147W                           | pre-mRNA    | small mRNA           |
| GI_7706428-S | 1894.5 | 1809.6 | 2159.7 | LOC51693   | <a href="#">NM_016209.1</a> |                                   |             |                      |



|              |        |        |        |           |                             |                                   |              |              |             |
|--------------|--------|--------|--------|-----------|-----------------------------|-----------------------------------|--------------|--------------|-------------|
| GI_7706434-S | 1175.7 | 998.6  | 906.4  | HECA      | <a href="#">NM_016217.1</a> | HDC;HDCL;hHDC;dJ225E12.1          | electron     | nucleus      | electron    |
| GI_7706436-I | 121.6  | 165.9  | 142.3  | MAN1B1    | <a href="#">NM_016219.1</a> | MANA-ER;DKFZP434I213              | mannosyl-    | membran      | oligosacch  |
| GI_7706442-S | 163.4  | 369.3  | 567.4  | CYB5R2    | <a href="#">NM_016229.1</a> | B5R.2                             |              |              |             |
| GI_7706446-S | 119.7  | 247.6  | 138.7  | PADI3     | <a href="#">NM_016233.1</a> | PDI3                              | protein-     |              | protein     |
| GI_7706450-S | 254.1  | 290.7  | 268.9  | GPRC5B    | <a href="#">NM_016235.1</a> | RAIG2;RAIG-2                      | metabotro    | membran      |             |
| GI_7706454-S | 853.3  | 754.9  | 617.2  | CYB5R1    | <a href="#">NM_016243.1</a> | B5R.1                             | oxidoredu    |              | electron    |
| GI_7706462-S | 97.5   | 98.2   | 100.4  | ZNF44     | <a href="#">NM_016264.1</a> | KOX7;ZNF58;GIOT-2;ZNF58 withdrawn | DNA          | nucleus      | regulation  |
| GI_7706464-S | 245.9  | 272.5  | 252.8  | ZNF325    | <a href="#">NM_016265.1</a> | GIOT-3                            | DNA          | nucleus      | regulation  |
| GI_7706468-S | 1012.3 | 475.8  | 502.2  | KLF2      | <a href="#">NM_016270.1</a> | LKLF                              | transcripti  | nucleus      | regulation  |
| GI_7706474-S | 88.6   | 95.4   | 84.4   | CES4      | <a href="#">NM_016280.1</a> | CESR;PCE-3                        | carboxyles   | endoplas     | xenobiotic  |
| GI_7706484-S | 1583.8 | 1215.4 | 1178.7 | TRAP1     | <a href="#">NM_016292.1</a> | HSP75                             | protein      | mitochond    | heat        |
| GI_7706492-S | 98.4   | 102    | 97.3   | LOC51725  | <a href="#">NM_016298.1</a> |                                   | zinc ion     |              |             |
| GI_7706496-S | 345.5  | 477.3  | 437.1  | UMP-CMPK  | <a href="#">NM_016308.1</a> |                                   | uridine      | cytoplasm    | pyrimidine  |
| GI_7706508-S | 153.8  | 203.6  | 142.2  | UPB1      | <a href="#">NM_016327.1</a> | BUP1                              | beta-        |              | nitrogen    |
| GI_7706512-S | 378.4  | 432.3  | 328.8  | RAPGEF6   | <a href="#">NM_016340.1</a> | PDZGEF2;PDZ-GEF2;RA-GEF-2         | protein      | plasma       | small       |
| GI_7706518-S | 86.2   | 89.4   | 92.7   | GHRL      | <a href="#">NM_016362.1</a> | MTLRP                             | growth       | soluble      | G-protein   |
| GI_7706528-S | 129.4  | 147.9  | 128.6  | CD244     | <a href="#">NM_016382.1</a> | 2B4;NAIL;Nmrk;NKR2B4;SLAMF4       | protein      | integral to  | cellular    |
| GI_7706548-S | 462    | 512.6  | 541.6  | CRK7      | <a href="#">NM_016507.1</a> | CRKRS;KIAA0904                    | ATP          | nucleus      | protein     |
| GI_7706556-A | 2218.4 | 2272.2 | 2325.5 | C9orf78   | <a href="#">NM_016520.1</a> | HSPC220                           |              |              |             |
| GI_7706562-S | 191.1  | 213.9  | 147.7  | RAB8B     | <a href="#">NM_016530.1</a> |                                   | GTP          | cellular_co  | small       |
| GI_7706566-S | 273    | 337.1  | 284.1  | GNG13     | <a href="#">NM_016541.1</a> | h2-35                             | signal       | heterotrim   | G-protein   |
| GI_7706570-A | 152.2  | 151.9  | 129.3  | SIGLEC7   | <a href="#">NM_016543.1</a> | p75;QA79;AIMR1;SIGLEC-7;p75/AIRM1 | lectin [goid | integral to  | cell        |
| GI_7706572-I | 105.9  | 116    | 112.5  | Cab45     | <a href="#">NM_016547.1</a> |                                   |              |              |             |
| GI_7706574-S | 2245.2 | 3369.3 | 3252.9 | TM7SF3    | <a href="#">NM_016551.1</a> |                                   |              | integral to  |             |
| GI_7706576-A | 130.9  | 130.7  | 116.2  | HUMGT198A | <a href="#">NM_016556.1</a> | TBPIP                             |              |              |             |
| GI_7706588-I | 216.9  | 250.1  | 219.2  | GNAS      | <a href="#">NM_016592.1</a> | AHO;GSA;GSP;POH;GPSA;NESP;GNAS1;P | heterotrim   | peripheral   | Golgi to    |
| GI_7706600-A | 250.8  | 227.7  | 265    | ZAK       | <a href="#">NM_016653.1</a> | MLTK;mlklak                       |              |              |             |
| GI_7706600-I | 165.3  | 135.7  | 165.6  | ZAK       | <a href="#">NM_016653.1</a> | MLTK;mlklak                       |              |              |             |
| GI_7706602-S | 209.8  | 182.7  | 171.6  | LW-1      | <a href="#">NM_016153.1</a> |                                   | transcripti  | nucleus      | regulation  |
| GI_7706610-S | 470.3  | 543.1  | 422.4  | MBIP      | <a href="#">NM_016586.1</a> |                                   | protein      |              | inactivatio |
| GI_7706634-S | 96.4   | 121.1  | 97.7   | C1orf10   | <a href="#">NM_016190.1</a> | PDRC1                             | calcium      |              |             |
| GI_7706636-S | 443.5  | 545.9  | 459    | PIAS1     | <a href="#">NM_016166.1</a> | GBP;DDXBP1;GU/RH-II               | ATP          | nucleus      | JAK-STAT    |
| GI_7706642-S | 218.4  | 242    | 239    | PLEK2     | <a href="#">NM_016445.1</a> |                                   |              | membran      | actin       |
| GI_7706644-S | 792.1  | 975.2  | 806.1  | PME-1     | <a href="#">NM_016147.1</a> |                                   | protein      |              | protein     |
| GI_7706660-S | 158.7  | 181.1  | 164    | PLA1A     | <a href="#">NM_015900.1</a> | PSPLA1;PS-PLA1                    | phospholi    |              | phosphati   |
| GI_7706664-S | 4923.2 | 5112.2 | 4932.7 | PTD008    | <a href="#">NM_016145.1</a> |                                   | molecular    | integral to  |             |
| GI_7706666-S | 2300   | 3165.1 | 3001.2 | TRAPPC4   | <a href="#">NM_016146.1</a> | SBDN;TRS23;PTD009;CGI-104;HSPC172 | protein      | Golgi        | vesicle-    |
| GI_7706670-S | 123.1  | 138.5  | 105.3  | PEX5R     | <a href="#">NM_016559.1</a> | PXR2B                             |              |              |             |
| GI_7706674-S | 389    | 463.6  | 282.4  | RAB6B     | <a href="#">NM_016577.1</a> |                                   | GTP          | Golgi        | retrograde  |
| GI_7706676-S | 126.9  | 189.1  | 143.7  | SLC14A1   | <a href="#">NM_015865.1</a> | JK;UT1;UTE;RACH1;UT-B1;HsT1341    | urea         | integral to  | urea        |
| GI_7706680-S | 307.8  | 278.3  | 256.5  | REV1L     | <a href="#">NM_016316.1</a> | REV1                              | DNA          | intracellula | mutagene    |
| GI_7706682-S | 101.6  | 106.7  | 86     | RHCG      | <a href="#">NM_016321.1</a> | RHGK                              | transporte   | integral to  | cell growth |
| GI_7706686-S | 333.6  | 451.9  | 307.7  | EVL       | <a href="#">NM_016337.1</a> | RNB6                              | cytoskelet   | cytoplasm    | actin       |
| GI_7706688-S | 173.3  | 190.4  | 187.1  | SFMBT1    | <a href="#">NM_016329.1</a> | RU1;SFMBT;DKFZp434L243            |              |              |             |

|              |         |        |        |           |                             |                          |              |              |              |
|--------------|---------|--------|--------|-----------|-----------------------------|--------------------------|--------------|--------------|--------------|
| GI_7706690-S | 106.2   | 90.6   | 91.4   | DCDC2     | <a href="#">NM_016356.1</a> | RU2;KIAA1154             | tumor        |              | cellular     |
| GI_7706692-S | 166.7   | 211.9  | 183.5  | MBTPS2    | <a href="#">NM_015884.1</a> | S2P                      | metalloen    | integral to  | cholesterol  |
| GI_7706703-S | 251     | 261.2  | 237.4  | SH120     | <a href="#">NM_016334.1</a> | GPR89-PENDING            | receptor     |              |              |
| GI_7706709-S | 2892.6  | 2400   | 2888.3 | SIRT6     | <a href="#">NM_016539.1</a> | SIR2L6                   | DNA          | chromatin    | chromatin    |
| GI_7706711-S | 882.6   | 967.5  | 1291.8 | SIRT7     | <a href="#">NM_016538.1</a> | SIR2L7                   | DNA          | chromatin    | chromatin    |
| GI_7706713-S | 255.1   | 293.9  | 286    | SLCO3A1   | <a href="#">NM_013272.2</a> | OATP-D;OATP3A1;SLC21A11  | transporte   | integral to  | ion          |
| GI_7706716-S | 92.3    | 96.1   | 89.8   | IMPG2     | <a href="#">NM_016247.1</a> | IPM200;SPACRCAN          | extracellul  | extracellul  | vision       |
| GI_7706726-S | 173.2   | 167.5  | 171.7  | ZNF589    | <a href="#">NM_016089.1</a> | SZF1                     | nucleic      | intracellula | regulation   |
| GI_7706742-A | 703.1   | 691.2  | 757.5  | TP53TG3   | <a href="#">NM_016212.1</a> | TP53TG3A                 |              |              |              |
| GI_7706744-S | 142.1   | 154.6  | 131.6  | TRIM      | <a href="#">NM_016388.1</a> | HSPC062                  | transmem     | integral to  | cellular     |
| GI_7706746-S | 88.2    | 85.3   | 85.9   | TRPC4     | <a href="#">NM_016179.1</a> | TRP4;HTRP4               | store-       |              | calcium      |
| GI_7706748-S | 2939.4  | 1984.1 | 1657   | TU12B1-TY | <a href="#">NM_016575.1</a> |                          |              |              |              |
| GI_7706750-S | 1027.4  | 1341.3 | 1077   | TUBG2     | <a href="#">NM_016437.1</a> |                          | structural   | microtubul   | microtubul   |
| GI_7706752-S | 955.7   | 1258.2 | 858.9  | UCHL5     | <a href="#">NM_015984.1</a> | UCH37;CGI-70             | ubiquitin    | cytosol      | ubiquitin-   |
| GI_7706758-S | 524.7   | 146.9  | 418.7  | VCX-2r    | <a href="#">NM_016378.1</a> | VCXB                     | molecular    | cellular_co  | biological_  |
| GI_7706760-S | 305.6   | 116.3  | 252.7  | VCX-8r    | <a href="#">NM_016379.1</a> | VCX-A                    | molecular    | cellular_co  | biological_  |
| GI_7706762-S | 402     | 521    | 439.5  | VILL      | <a href="#">NM_015873.1</a> |                          | structural   | actin        | cytoskelet   |
| GI_7706780-I | 652.9   | 584    | 477.1  | ZNF226    | <a href="#">NM_016444.1</a> |                          |              |              |              |
| GI_7710049-S | 144.9   | 173.4  | 165.7  | OAZ3      | <a href="#">NM_016178.1</a> | OAZ-t                    | ornithine    |              | spermatog    |
| GI_7710111-I | 182.1   | 226.4  | 200.3  | ACHE      | <a href="#">NM_015831.1</a> | YT                       | acetylcholi  | peripheral   | neurotran    |
| GI_7710118-S | 224     | 275.1  | 232.1  | EN1       | <a href="#">NM_001426.2</a> |                          | transcripti  | nucleus      | skeletal     |
| GI_7710120-S | 94      | 98.7   | 95.3   | EN2       | <a href="#">NM_001427.2</a> |                          | transcripti  | nucleus      | developm     |
| GI_7710123-S | 119.8   | 128.1  | 129.3  | KLRC4     | <a href="#">NM_013431.1</a> | NKG2F;NKG2-F             | receptor     | integral to  | cellular     |
| GI_7710125-I | 367.7   | 426.9  | 429.9  | LIG3      | <a href="#">NM_013975.1</a> |                          | DNA          | nucleus      | meiotic      |
| GI_7710127-A | 229.5   | 278.5  | 242.7  | LIG3      | <a href="#">NM_002311.2</a> |                          | DNA          | nucleus      | meiotic      |
| GI_7710127-I | 109.8   | 123.3  | 118.9  | LIG3      | <a href="#">NM_002311.2</a> |                          | DNA          | nucleus      | meiotic      |
| GI_7710128-S | 206.4   | 282.1  | 270.2  | LMO6      | <a href="#">NM_006150.3</a> |                          | molecular    | cellular_co  | biological_  |
| GI_7710148-S | 232.7   | 206.7  | 195.6  | MECP2     | <a href="#">NM_004992.2</a> | RTS;RTT;PPMX;MRX16;MRX79 | transcripti  | nucleus      | negative     |
| GI_7710155-S | 4476.1  | 4038.2 | 2808.7 | WARS      | <a href="#">NM_004184.2</a> | IFI53;IFP53;GAMMA-2      | ATP          | soluble      | tryptophan   |
| GI_7710156-A | 298.1   | 362.7  | 337    | ACHE      | <a href="#">NM_000665.2</a> | YT                       | acetylcholi  | peripheral   | neurotran    |
| GI_7770071-I | 115.1   | 129.2  | 108.2  | IARS      | <a href="#">NM_013417.1</a> | ILRS                     | ATP          | soluble      | protein      |
| GI_7770073-A | 10004.2 | 7981.4 | 6722.8 | IARS      | <a href="#">NM_002161.2</a> | ILRS                     | ATP          | soluble      | protein      |
| GI_7770078-A | 102.6   | 106.9  | 103.8  | TAC1      | <a href="#">NM_013998.1</a> | NK2;NKNA;TAC2;Hs.2563    | tachykinin   | extracellul  | inseminati   |
| GI_8051576-A | 111.7   | 186.6  | 577.4  | ABCG1     | <a href="#">NM_016818.1</a> | ABC8;WHITE1              | L-           | membran      | small        |
| GI_8051578-S | 365     | 523.3  | 392.4  | AK3       | <a href="#">NM_013410.1</a> | AK4                      | adenylate    | mitochond    | nucleobas    |
| GI_8051583-S | 117.5   | 132.2  | 118.8  | FCN1      | <a href="#">NM_002003.2</a> | FCNM                     | lectin [goid |              | opsinizatio  |
| GI_8051585-A | 86.3    | 89.3   | 85     | FCN2      | <a href="#">NM_015837.1</a> | P35;FCNL;EBP-37          | lectin [goid | microfibril  | opsinizatio  |
| GI_8051589-I | 303.4   | 368.3  | 323.6  | FCN2      | <a href="#">NM_015839.1</a> | P35;FCNL;EBP-37          | lectin [goid | microfibril  | opsinizatio  |
| GI_8051600-S | 104.2   | 115    | 100.2  | GALR2     | <a href="#">NM_003857.2</a> | GALNR2                   | galanin      | integral to  | cytosolic    |
| GI_8051601-S | 417.4   | 851.4  | 562.3  | GPC6      | <a href="#">NM_005708.2</a> |                          | glypican     | membran      | cell growth  |
| GI_8051602-S | 147.9   | 173.7  | 159.5  | GYPA      | <a href="#">NM_002099.2</a> | MN;GPA;MNS               | blood        | membran      | invasive     |
| GI_8051603-S | 155.3   | 179.1  | 162.8  | GYPB      | <a href="#">NM_002100.2</a> | SS;MNS                   | blood        | integral to  |              |
| GI_8051607-S | 137.5   | 162.4  | 144.7  | HMOX2     | <a href="#">NM_002134.2</a> | HO-2                     | heme         | microsom     | heme         |
| GI_8051609-S | 901.6   | 1186.2 | 818.5  | KDELRL2   | <a href="#">NM_006854.2</a> | ELP-1;ERD2.2             | KDEL         | Golgi        | intracellula |

|              |        |        |        |          |                             |                                     |             |             |              |
|--------------|--------|--------|--------|----------|-----------------------------|-------------------------------------|-------------|-------------|--------------|
| GI_8051610-A | 554.4  | 704.9  | 406.5  | KDEL3    | <a href="#">NM_016657.1</a> | ERD2L3                              | protein     | endoplas    | intracellula |
| GI_8051610-I | 230.2  | 241.1  | 223.9  | KDEL3    | <a href="#">NM_016657.1</a> | ERD2L3                              | protein     | endoplas    | intracellula |
| GI_8051612-I | 541.6  | 692    | 389.5  | KDEL3    | <a href="#">NM_006855.2</a> | ERD2L3                              | protein     | endoplas    | intracellula |
| GI_8051613-S | 1465.7 | 2800.8 | 2917.5 | LDLR     | <a href="#">NM_000527.2</a> | FH;FHC                              | lipoprotein | coated pit  | endocytosi   |
| GI_8051614-A | 3069   | 3763.8 | 6920.8 | LIMK1    | <a href="#">NM_016735.1</a> | LIMK                                | protein     | cytoplasm   | actin        |
| GI_8051616-I | 140.8  | 153.3  | 143.9  | LIMK1    | <a href="#">NM_002314.2</a> | LIMK                                | protein     | cytoplasm   | actin        |
| GI_8051617-I | 109.2  | 105.6  | 103.3  | LIMK2    | <a href="#">NM_016733.1</a> |                                     |             |             |              |
| GI_8051619-A | 431.5  | 460    | 361.9  | LIMK2    | <a href="#">NM_005569.2</a> |                                     |             |             |              |
| GI_8051619-I | 142.1  | 165.4  | 148.1  | LIMK2    | <a href="#">NM_005569.2</a> |                                     |             |             |              |
| GI_8051620-I | 249.7  | 328.5  | 161    | OAS1     | <a href="#">NM_016816.1</a> | OIAS;IFI-4;OIASI                    | antiviral   | cytoplasm   | nucleobas    |
| GI_8051622-A | 194.1  | 262.5  | 129.3  | OAS1     | <a href="#">NM_002534.1</a> | OIAS;IFI-4;OIASI                    | antiviral   | cytoplasm   | nucleobas    |
| GI_8051622-I | 1015.7 | 1211.3 | 1102   | OAS1     | <a href="#">NM_002534.1</a> | OIAS;IFI-4;OIASI                    | antiviral   | cytoplasm   | nucleobas    |
| GI_8051624-A | 117.8  | 130.5  | 116.5  | OAS2     | <a href="#">NM_016817.1</a> | P69                                 | antiviral   | membran     | nucleobas    |
| GI_8051624-I | 131.5  | 166    | 113.8  | OAS2     | <a href="#">NM_016817.1</a> | P69                                 | antiviral   | membran     | nucleobas    |
| GI_8051626-I | 112.3  | 111.3  | 117.5  | RRAGB    | <a href="#">NM_016656.1</a> | RAGB                                | GTP         | cytoplasm   | signal       |
| GI_8051628-A | 188.2  | 206.9  | 204.9  | RRAGB    | <a href="#">NM_006064.2</a> | RAGB                                | GTP         | cytoplasm   | signal       |
| GI_8051632-S | 119.8  | 152.8  | 139.8  | RARRES2  | <a href="#">NM_002889.2</a> | TIG2;HP10433                        | molecular   | cellular_co | retinoid     |
| GI_8051633-S | 154.6  | 409.9  | 182.8  | RARRES3  | <a href="#">NM_004585.2</a> | RIG1;TIG3                           | tumor       |             | negative     |
| GI_8051634-S | 2039   | 2051.8 | 1860.4 | XPO1     | <a href="#">NM_003400.2</a> | CRM1                                | protein     | nuclear     | nucleocyto   |
| GI_8392890-S | 82.5   | 100.1  | 95.2   | ALB      | <a href="#">NM_000477.3</a> | PRO0883                             | transporte  | extracellul | transport    |
| GI_8393008-S | 795.3  | 880.2  | 860.7  | C11orf2  | <a href="#">NM_013265.2</a> | ANG2                                | molecular   | integral to | biological_  |
| GI_8393012-S | 390.5  | 428.5  | 308.4  | C21orf18 | <a href="#">NM_017438.1</a> |                                     |             |             |              |
| GI_8393017-S | 993.2  | 1133.6 | 520    | C21orf6  | <a href="#">NM_016940.1</a> | GL011                               | acylphosp   | cellular_co | biological_  |
| GI_8393146-S | 82.6   | 88.4   | 88.8   | CLIC5    | <a href="#">NM_016929.1</a> | CLIC5B                              | chloride    | insoluble   | pregnancy    |
| GI_8393249-S | 105.5  | 104.1  | 102.2  | 1-Dec    | <a href="#">NM_017418.1</a> | CTS9                                | tumor       |             | negative     |
| GI_8393258-S | 2952.7 | 2470.6 | 2198.8 | TFIP11   | <a href="#">NM_012143.1</a> | TIP39;DKFZP434B194                  | nucleic     | nucleus     | ossificatio  |
| GI_8393298-S | 990.3  | 1521.2 | 622.1  | EFEMP2   | <a href="#">NM_016938.1</a> | UPH1;FBLN4                          | extracellul | basement    | blood        |
| GI_8393364-S | 67.3   | 84.2   | 83.5   | BCMO1    | <a href="#">NM_017429.1</a> | BCO;BCDO;BCMO;BCDO1;FLJ10730        | oxidoredu   |             |              |
| GI_8393383-S | 8643.2 | 5522   | 4987   | C6orf48  | <a href="#">NM_016947.1</a> | G8;D6S57                            | major       |             |              |
| GI_8393411-S | 99.8   | 95.9   | 89.5   | GALNT8   | <a href="#">NM_017417.1</a> | GALNAC-T8                           | polypeptid  | membran     | RNA          |
| GI_8393506-S | 121    | 142.1  | 137.5  | GUCY1B2  | <a href="#">NM_004129.1</a> | GC-SB2                              | guanylate   |             | intracellula |
| GI_8393515-S | 537.7  | 671    | 688.5  | H105E3   | <a href="#">NM_015922.1</a> | NSDHL                               | 3-beta-     |             | cholestero   |
| GI_8393566-S | 114.7  | 110    | 101.2  | SPOCK3   | <a href="#">NM_016950.1</a> | TES-3;HSAJ1454;testican-3           | metalloen   | extracellul |              |
| GI_8393607-S | 421.3  | 564.3  | 522.8  | IMPA1    | <a href="#">NM_005536.2</a> | IMPA                                | inositol-   |             | phosphati    |
| GI_8393671-S | 231    | 193.4  | 160.5  | KLHL3    | <a href="#">NM_017415.1</a> | KIAA1129                            |             |             |              |
| GI_8393712-A | 195.2  | 191.6  | 165.5  | SLA/LP   | <a href="#">NM_016955.1</a> |                                     | tRNA        |             |              |
| GI_8393994-S | 108.8  | 113.2  | 109.5  | POLA     | <a href="#">NM_016937.1</a> |                                     | eta DNA     | nucleus     | DNA          |
| GI_8394043-S | 184.8  | 230.7  | 210.1  | PRKAG3   | <a href="#">NM_017431.1</a> |                                     | SNF1A/A     |             | protein      |
| GI_8394276-S | 156.5  | 135.3  | 140.7  | SIX4     | <a href="#">NM_017420.1</a> | AREC3                               | transcripti | nucleus     | embryoge     |
| GI_8394394-S | 331.5  | 416.6  | 356.4  | TAS2R16  | <a href="#">NM_016945.1</a> | T2R16                               | taste       | integral to | taste [goid  |
| GI_8394397-S | 95.9   | 98.9   | 106.9  | TAS2R3   | <a href="#">NM_016943.1</a> | T2R3                                | taste       | integral to | taste [goid  |
| GI_8394401-S | 143.7  | 166.2  | 150.2  | TAS2R4   | <a href="#">NM_016944.1</a> | T2R4                                | taste       | integral to | taste [goid  |
| GI_8394416-S | 327.3  | 223.2  | 400.9  | PARD6A   | <a href="#">NM_016948.1</a> | PAR-6;TAX40;PAR-6A;TIP-40;PAR6alpha | transcripti | tight       | viral life   |
| GI_8400709-S | 515.8  | 785.2  | 524.7  | HES1     | <a href="#">NM_005524.2</a> | HHL;HRY;HES-1;FLJ20408              | DNA         | nucleus     | neurogene    |

|              |        |        |        |            |                             |                                       |             |              |              |
|--------------|--------|--------|--------|------------|-----------------------------|---------------------------------------|-------------|--------------|--------------|
| GI_8400712-I | 189.7  | 207    | 188.1  | MAPT       | <a href="#">NM_016835.1</a> | TAU;MSTD;PPND;DDPAC;MAPTL;MTBT1;M     | structural  | microtubul   | microtubul   |
| GI_8400714-A | 94.9   | 117.3  | 112.7  | MAPT       | <a href="#">NM_016841.1</a> | TAU;MSTD;PPND;DDPAC;MAPTL;MTBT1;M     | structural  | microtubul   | microtubul   |
| GI_8400716-S | 95.6   | 83.1   | 92.4   | NEB        | <a href="#">NM_004543.2</a> | NEM2                                  | structural  | actin        | muscle       |
| GI_8400721-A | 2062.8 | 1870.4 | 1323.9 | RBMS1      | <a href="#">NM_016838.1</a> | YC1;SCR2;MSSP-1;MSSP-2;MSSP-3         | double-     |              | RNA          |
| GI_8400723-I | 89     | 79.7   | 82.4   | RBMS1      | <a href="#">NM_016839.1</a> | YC1;SCR2;MSSP-1;MSSP-2;MSSP-3         | double-     |              | RNA          |
| GI_8400726-S | 109.2  | 116.8  | 96.9   | RBP1       | <a href="#">NM_002899.2</a> | CRBP;RBPC;CRBP1;CRABP-I               | retinoid    |              | vitamin A    |
| GI_8400727-S | 134.3  | 125    | 112.3  | RBP4       | <a href="#">NM_006744.2</a> |                                       | retinoid    | extracellul  |              |
| GI_8400731-S | 322    | 1336.7 | 3733.3 | SFRP1      | <a href="#">NM_003012.2</a> | FRP;FRP1;FrzA;FRP-1;SARP2             | transmem    | membran      | anti-        |
| GI_8400733-S | 159.2  | 191    | 168.5  | SFRP4      | <a href="#">NM_003014.2</a> | FRP-4;FRPHE                           | transmem    | membran      | embryo       |
| GI_8400734-S | 166.7  | 207.5  | 181.7  | SFRP5      | <a href="#">NM_003015.2</a> | SARP3                                 | transmem    | membran      | establish    |
| GI_8400737-S | 395.4  | 467.3  | 368.6  | TP53       | <a href="#">NM_000546.2</a> | P53;TRP53                             | nuclease    | nucleus      | induction    |
| GI_8567387-S | 375.4  | 406    | 391.5  | PER3       | <a href="#">NM_016831.1</a> |                                       | signal      | nucleus      | regulation   |
| GI_8659554-S | 4207.9 | 7301.6 | 4337.4 | ACO1       | <a href="#">NM_002197.1</a> | IRP1;IREB1;IREBP                      | aconitate   | cytoplasm    | tricarboxyli |
| GI_8659566-S | 120.7  | 123.9  | 115.2  | KERA       | <a href="#">NM_007035.2</a> | CNA2;SLRR2B                           | molecular   | extracellul  | eye          |
| GI_8670537-A | 317.4  | 269.9  | 292.2  | OGG1       | <a href="#">NM_016827.1</a> | HMMH;MUTM;OGH1;HOGG1                  | purine-     | nucleoplas   | base-        |
| GI_8670543-A | 686.1  | 892    | 1160.2 | PSCD1      | <a href="#">NM_017456.1</a> | B2-1;SEC7;D17S811E;CYTOHESIN-1        | ARF         | kinesin      | vesicle-     |
| GI_8670549-S | 148    | 244.5  | 311.3  | PSCD4      | <a href="#">NM_013385.2</a> | CYT4;DJ63G5.1;CYTOHESIN-4             | ARF         |              |              |
| GI_8670550-S | 107.8  | 128.9  | 95.3   | PSCDBP     | <a href="#">NM_004288.2</a> | HE;B3-1;CYBR                          | protein     |              | intracellula |
| GI_8850216-S | 88.1   | 94.8   | 85.8   | HNRNPG-T   | <a href="#">NM_014469.2</a> | HNRPGT                                | nucleic     | ribonucleo   | regulation   |
| GI_8850230-S | 199.9  | 237    | 198.2  | MYCBP      | <a href="#">NM_012333.2</a> | AMY-1                                 | transcripti | mitochond    | regulation   |
| GI_8850235-S | 93.6   | 98     | 89.8   | UGT1A1     | <a href="#">NM_000463.1</a> | GNT1;UGT1;UGT1A;UGT1A5                | UDP-        | microsom     | bilirubin    |
| GI_8922068-S | 205    | 247.5  | 218.3  | C5orf3     | <a href="#">NM_018691.1</a> | 133K02                                | purine      | cellular_co  | biological_  |
| GI_8922070-S | 135.4  | 160.3  | 138.1  | LOC55565   | <a href="#">NM_017530.1</a> |                                       |             |              |              |
| GI_8922074-S | 2056.9 | 1764.6 | 2305   | ACK1       | <a href="#">NM_005781.2</a> | ACK                                   | GTPase      | cytoplasm    | small        |
| GI_8922076-S | 151.4  | 188.4  | 166    | ADARB2     | <a href="#">NM_018702.1</a> | RED2;ADAR3;hRED2                      | double-     | intracellula | RNA          |
| GI_8922080-S | 120    | 143.9  | 128.6  | ASH1L      | <a href="#">NM_018489.1</a> | ASH1;ASH1L1;huASH1;KIAA1420           | RNA         | tight        | positive     |
| GI_8922084-S | 570.6  | 471.6  | 702.4  | SLC35E3    | <a href="#">NM_018656.1</a> | BLOV1                                 |             |              |              |
| GI_8922103-S | 208.4  | 224.8  | 189.2  | BM045      | <a href="#">NM_018459.1</a> |                                       |             |              |              |
| GI_8922107-S | 111    | 409.9  | 82.2   | C17        | <a href="#">NM_018659.1</a> |                                       | receptor    | soluble      | signal       |
| GI_8922115-S | 138.3  | 175.9  | 124    | C9orf7     | <a href="#">NM_017586.1</a> | D9S2135                               |             |              |              |
| GI_8922121-S | 183.4  | 219.4  | 169.9  | ELAC1      | <a href="#">NM_018696.1</a> | D29                                   |             |              |              |
| GI_8922125-S | 336    | 198.3  | 162.4  | DKFZp434C0 | <a href="#">NM_017577.1</a> |                                       |             |              |              |
| GI_8922127-S | 98.6   | 93.8   | 92.3   | DKFZp434C0 | <a href="#">NM_017598.1</a> |                                       |             |              |              |
| GI_8922129-I | 95.1   | 93.2   | 110.1  | EGLN2      | <a href="#">NM_017555.1</a> | EIT6;PHD1;HIFPH1;DKFZp434E026         |             |              |              |
| GI_8922137-S | 230.4  | 288    | 251.7  | DKFZp434H2 | <a href="#">NM_017559.1</a> |                                       |             |              |              |
| GI_8922152-S | 94.4   | 103.8  | 97.5   | DKFZp547G1 | <a href="#">NM_018705.1</a> |                                       |             |              |              |
| GI_8922154-S | 89.9   | 95.1   | 81.9   | ZNT8       | <a href="#">NM_018713.1</a> | DKFZp547M236                          | cation      | membran      | cation       |
| GI_8922158-S | 140.3  | 145.5  | 128.4  | DKFZp566H0 | <a href="#">NM_017535.1</a> |                                       |             |              |              |
| GI_8922171-S | 1098.2 | 1535   | 1199.5 | DKFZp761K1 | <a href="#">NM_018422.1</a> |                                       |             |              |              |
| GI_8922174-S | 94.6   | 118.3  | 105.9  | DKFZp761K1 | <a href="#">NM_017597.1</a> |                                       |             |              |              |
| GI_8922178-S | 100.9  | 101.8  | 92.2   | DKFZp761P1 | <a href="#">NM_018423.1</a> | STYK1                                 | protein-    |              | protein      |
| GI_8922193-I | 73.1   | 90.8   | 96.1   | APG16L     | <a href="#">NM_017974.1</a> | WDR30;FLJ00045;FLJ10035;FLJ10828;FLJ2 |             |              |              |
| GI_8922197-S | 841.9  | 1119.1 | 1222.3 | FLJ10038   | <a href="#">NM_017976.1</a> |                                       | DNA         | nucleus      | regulation   |
| GI_8922199-S | 298.2  | 363.1  | 308    | AIM1L      | <a href="#">NM_017977.1</a> | FLJ10040                              | DNA         | nucleus      | regulation   |

|              |        |        |        |           |                             |                     |           |             |              |            |
|--------------|--------|--------|--------|-----------|-----------------------------|---------------------|-----------|-------------|--------------|------------|
| GI_8922201-A | 117.9  | 137.3  | 137.5  | SMAP-1    | <a href="#">NM_017979.1</a> | FLJ10043;IRO039700  |           |             |              |            |
| GI_8922201-I | 3601.8 | 3914.5 | 3815.3 | SMAP-1    | <a href="#">NM_017979.1</a> | FLJ10043;IRO039700  |           |             |              |            |
| GI_8922205-S | 125.7  | 420    | 127.6  | FLJ10052  | <a href="#">NM_017982.1</a> |                     |           |             |              |            |
| GI_8922211-S | 99.7   | 92.7   | 97.7   | C9orf68   | <a href="#">NM_017985.1</a> | FLJ10058            |           |             |              |            |
| GI_8922226-S | 199.4  | 162    | 147    | FLJ10094  | <a href="#">NM_017993.1</a> |                     | nucleic   |             |              |            |
| GI_8922232-S | 627.8  | 521.7  | 506.8  | C9orf40   | <a href="#">NM_017998.1</a> | FLJ10110            | actin     |             |              |            |
| GI_8922236-S | 225    | 201.2  | 232.8  | FLJ10116  | <a href="#">NM_018000.1</a> |                     |           |             |              |            |
| GI_8922238-S | 80.6   | 89.2   | 81.8   | FLJ10120  | <a href="#">NM_018001.1</a> |                     |           |             |              |            |
| GI_8922242-S | 308.1  | 712.4  | 329    | FLJ10134  | <a href="#">NM_018004.1</a> | DERP7               |           | integral to |              |            |
| GI_8922258-S | 1118.2 | 1574.3 | 1208.2 | FLJ10154  | <a href="#">NM_018011.1</a> |                     |           |             |              |            |
| GI_8922262-S | 379.7  | 396.7  | 187.1  | FLJ10159  | <a href="#">NM_018013.1</a> |                     |           |             |              |            |
| GI_8922276-S | 2166.3 | 2168.5 | 1655.6 | FLJ10199  | <a href="#">NM_018022.1</a> |                     |           |             |              |            |
| GI_8922280-S | 842.1  | 747.6  | 449.8  | FLJ10204  | <a href="#">NM_018024.1</a> |                     |           |             |              |            |
| GI_8922306-A | 97.3   | 112.4  | 113.7  | RALGPS2   | <a href="#">NM_018037.1</a> | FLJ10244;FLJ25604   | guanyl-   |             | intracellula |            |
| GI_8922306-I | 75.6   | 79.7   | 80.8   | RALGPS2   | <a href="#">NM_018037.1</a> | FLJ10244;FLJ25604   | guanyl-   |             | intracellula |            |
| GI_8922308-S | 157.4  | 181.5  | 158.6  | FLJ10246  | <a href="#">NM_018038.1</a> |                     |           |             |              |            |
| GI_8922312-S | 190.9  | 211.8  | 194.5  | FLJ10252  | <a href="#">NM_018040.1</a> |                     | nucleic   |             | intracellula |            |
| GI_8922327-S | 2834.1 | 2080   | 2465.6 | FLJ10290  | <a href="#">NM_018047.1</a> |                     | nucleic   |             |              |            |
| GI_8922332-S | 544.1  | 454    | 628    | PLEKHJ1   | <a href="#">NM_018049.1</a> | GNRPX;FLJ10297      |           |             |              |            |
| GI_8922347-S | 1097.3 | 917.3  | 715.4  | FLJ10315  | <a href="#">NM_018056.1</a> |                     |           |             |              |            |
| GI_8922357-S | 301.4  | 339.5  | 245.6  | FLJ10330  | <a href="#">NM_018061.1</a> |                     | DNA       | nucleus     | regulation   |            |
| GI_8922359-S | 324.8  | 245.5  | 287    | FANCL     | <a href="#">NM_018062.1</a> | POG;PHF9;FLJ10335   | ligase    | nucleus     | DNA          |            |
| GI_8922387-S | 454    | 452.1  | 407.4  | FLJ10377  | <a href="#">NM_018077.1</a> |                     | nucleic   |             |              |            |
| GI_8922395-S | 228.8  | 255.3  | 312    | FLJ10385  | <a href="#">NM_018081.1</a> |                     |           |             |              |            |
| GI_8922406-S | 145.3  | 151.7  | 148.3  | FIGN      | <a href="#">NM_018086.1</a> | FLJ10405;FLJ22094   |           |             |              |            |
| GI_8922410-S | 78.6   | 87.2   | 90.3   | FLJ10408  | <a href="#">NM_018088.1</a> |                     | nucleic   | nucleus     | regulation   |            |
| GI_8922412-S | 1953.8 | 2193.9 | 1657.4 | FLJ10415  | <a href="#">NM_018089.1</a> |                     |           |             |              |            |
| GI_8922421-S | 981.9  | 695.4  | 631.6  | FLJ10439  | <a href="#">NM_018093.1</a> |                     |           |             |              |            |
| GI_8922423-S | 307.2  | 642.3  | 478.8  | GSPT2     | <a href="#">NM_018094.1</a> | GST2;ERF3B;FLJ10441 | GTP       |             | translation  |            |
| GI_8922429-S | 250.5  | 302.2  | 273.7  | FLJ10460  | <a href="#">NM_018097.1</a> |                     |           |             |              |            |
| GI_8922435-S | 467.5  | 609.6  | 540.1  | EFHC1     | <a href="#">NM_018100.1</a> | FLJ10466            | calcium   |             |              |            |
| GI_8922437-S | 1023.2 | 923    | 1275.6 | CDCA8     | <a href="#">NM_018101.1</a> | FLJ10468;FLJ12042   |           |             |              |            |
| GI_8922458-S | 291.1  | 324.8  | 343.3  | FLJ10490  | <a href="#">NM_018111.1</a> |                     |           |             |              |            |
| GI_8922460-S | 345.2  | 262.8  | 469.9  | C9orf87   | <a href="#">NM_018112.1</a> | FLJ10493;bA219P18.1 |           |             |              |            |
| GI_8922462-S | 525.5  | 723.5  | 320    | LIMR      | <a href="#">NM_018113.1</a> | FLJ10494;KIAA1174   |           |             |              |            |
| GI_8922466-S | 778.6  | 721.4  | 648.8  | FLJ10498  | <a href="#">NM_018115.1</a> |                     |           |             |              |            |
| GI_8922473-S | 191.6  | 199.2  | 167.6  | MCM3APAS  | <a href="#">NM_018118.1</a> | C21orf85;FLJ10508   |           |             | integral to  |            |
| GI_8922490-S | 179.6  | 198.4  | 169.2  | FLJ10525  | <a href="#">NM_018126.1</a> |                     | molecular |             | integral to  |            |
| GI_8922497-S | 154.3  | 156.8  | 140.6  | PNPO      | <a href="#">NM_018129.1</a> | FLJ10535            | pyridoxam |             |              | pyridoxine |
| GI_8922499-S | 1424.1 | 1469.1 | 1234.1 | FLJ10539  | <a href="#">NM_018130.1</a> |                     |           |             |              |            |
| GI_8922508-S | 322.6  | 285.8  | 316.7  | FLJ10547  | <a href="#">NM_018134.1</a> |                     |           |             |              |            |
| GI_8922514-S | 486.5  | 591.2  | 679.1  | PRMT6     | <a href="#">NM_018137.1</a> | FLJ10559            | S-        |             | nucleus      |            |
| GI_8922516-S | 171    | 186.3  | 173.3  | FLJ10560  | <a href="#">NM_018138.1</a> |                     | sugar     |             |              | phosphoe   |
| GI_8922518-S | 432.8  | 434.8  | 345.7  | C14orf104 | <a href="#">NM_018139.1</a> | FLJ10563            |           |             |              |            |

|              |        |        |        |           |                             |                                     |           |                         |
|--------------|--------|--------|--------|-----------|-----------------------------|-------------------------------------|-----------|-------------------------|
| GI_8922520-S | 164.4  | 174.5  | 164.6  | FLJ10565  | <a href="#">NM_018140.1</a> |                                     |           |                         |
| GI_8922524-S | 755.8  | 1031.5 | 1113.6 | FLJ10569  | <a href="#">NM_018142.1</a> |                                     |           |                         |
| GI_8922527-S | 105.5  | 108.2  | 105.5  | KLHL11    | <a href="#">NM_018143.1</a> | FLJ10572                            | protein   |                         |
| GI_8922531-S | 839.8  | 1068.2 | 1022.7 | FLJ10579  | <a href="#">NM_018145.1</a> |                                     | DNA       | DNA                     |
| GI_8922535-S | 132.8  | 212.7  | 232.7  | FAIM      | <a href="#">NM_018147.1</a> | FAIM1;FLJ10582                      |           |                         |
| GI_8922541-I | 344.6  | 303.4  | 299.8  | FLJ10597  | <a href="#">NM_018150.1</a> |                                     |           |                         |
| GI_8922548-S | 197.3  | 233.2  | 315.5  | ASF1B     | <a href="#">NM_018154.1</a> | CIA-II;FLJ10604                     |           |                         |
| GI_8922550-S | 346.4  | 362.2  | 276.8  | FLJ10618  | <a href="#">NM_018155.1</a> |                                     | binding   | mitochond mitochond     |
| GI_8922554-S | 489.2  | 536    | 501.5  | hSyn      | <a href="#">NM_018157.1</a> | RIC-8;FLJ10620                      |           |                         |
| GI_8922556-S | 395.3  | 441.4  | 431    | SLC4A1AP  | <a href="#">NM_018158.1</a> | HLC3;FLJ10624                       | double-   | intracellula            |
| GI_8922562-S | 389.4  | 523.5  | 498.7  | FLJ10634  | <a href="#">NM_018163.1</a> |                                     | nucleic   | protein                 |
| GI_8922566-S | 1918.4 | 1841.3 | 1797.9 | FLJ10647  | <a href="#">NM_018166.1</a> |                                     |           |                         |
| GI_8922570-S | 97.9   | 89.5   | 90.8   | C14orf105 | <a href="#">NM_018168.1</a> | FLJ10650                            |           |                         |
| GI_8922572-S | 435.8  | 542.3  | 491.1  | FLJ10652  | <a href="#">NM_018169.1</a> |                                     |           |                         |
| GI_8922580-S | 111    | 124.7  | 111.9  | FLJ10665  | <a href="#">NM_018173.1</a> |                                     |           |                         |
| GI_8922595-S | 575.5  | 704.1  | 685.5  | FLJ10700  | <a href="#">NM_018182.1</a> |                                     |           |                         |
| GI_8922600-S | 2554.3 | 2517.6 | 2603.1 | ARL10C    | <a href="#">NM_018184.1</a> | FLJ10702                            | small     | small                   |
| GI_8922602-S | 143.8  | 124.1  | 134.1  | C13orf17  | <a href="#">NM_018185.1</a> | FLJ10704;FLJ20092                   |           |                         |
| GI_8922611-S | 118.9  | 140.1  | 117.4  | DPPA4     | <a href="#">NM_018189.1</a> | FLJ10713                            |           |                         |
| GI_8922620-S | 494.1  | 470.4  | 688    | MART2     | <a href="#">NM_018194.1</a> | SKI1;MART-2;FLJ10724                |           |                         |
| GI_8922624-S | 116.3  | 137.1  | 130    | TMLHE     | <a href="#">NM_018196.1</a> | TMLH;FLJ10727                       | oxidoredu | mitochond carnitine     |
| GI_8922628-S | 1459.9 | 1619.2 | 1527.8 | FLJ10737  | <a href="#">NM_018198.1</a> |                                     |           |                         |
| GI_8922630-S | 554.9  | 550.5  | 479.8  | C14orf114 | <a href="#">NM_018199.1</a> | FLJ10738                            | nucleic   | intracellula electron   |
| GI_8922639-S | 126.8  | 153.1  | 136.2  | FLJ10748  | <a href="#">NM_018203.1</a> |                                     |           |                         |
| GI_8922643-A | 367    | 330.1  | 368.1  | FLJ10751  | <a href="#">NM_018205.1</a> | FLJ10844                            |           |                         |
| GI_8922643-I | 180    | 224.6  | 201.5  | FLJ10751  | <a href="#">NM_018205.1</a> | FLJ10844                            |           |                         |
| GI_8922647-S | 146.2  | 217.7  | 146.5  | FLJ10759  | <a href="#">NM_018207.1</a> |                                     | zinc ion  | intracellula            |
| GI_8922649-S | 202.5  | 263.6  | 329.8  | FLJ10761  | <a href="#">NM_018208.1</a> |                                     | choline   | cellular_co biological_ |
| GI_8922653-S | 806.9  | 889.7  | 774    | FLJ10769  | <a href="#">NM_018210.1</a> |                                     |           |                         |
| GI_8922664-S | 720.2  | 810.4  | 801.5  | PANK4     | <a href="#">NM_018216.1</a> | FLJ10782;DKFZp547M242               | ATP       | coenzyme                |
| GI_8922666-S | 1195.8 | 1424.4 | 2033.1 | C20orf31  | <a href="#">NM_018217.1</a> | C20orf49;FLJ10783;bA4204.1          | mannosyl- | membran N-linked        |
| GI_8922668-S | 257.5  | 328.2  | 281.5  | FLJ10786  | <a href="#">NM_018219.1</a> |                                     |           |                         |
| GI_8922670-S | 91.5   | 85.7   | 89.8   | C2orf6    | <a href="#">NM_018221.1</a> | MOB1;Mob4B;MOBK1B;FLJ10788;FLJ11595 |           |                         |
| GI_8922674-S | 856.2  | 1141.1 | 1368.2 | CHFR      | <a href="#">NM_018223.1</a> | RNF116;FLJ10796                     |           |                         |
| GI_8922676-S | 186.5  | 172.2  | 146.7  | FLJ10803  | <a href="#">NM_018224.1</a> |                                     |           |                         |
| GI_8922678-S | 214.1  | 336.4  | 238.7  | SMU-1     | <a href="#">NM_018225.1</a> | BWD;FLJ10805                        |           |                         |
| GI_8922685-S | 116.5  | 113.7  | 108.5  | C14orf115 | <a href="#">NM_018228.1</a> | FLJ10811                            |           |                         |
| GI_8922691-S | 205.7  | 328.7  | 378.4  | FLJ10815  | <a href="#">NM_018231.1</a> |                                     | amino     | membran amino           |
| GI_8922698-S | 1000.2 | 979.7  | 1207.8 | CN2       | <a href="#">NM_018235.1</a> | FLJ10830                            |           |                         |
| GI_8922702-I | 143.3  | 145    | 131.3  | FLJ10751  | <a href="#">NM_018239.1</a> | FLJ10844                            |           |                         |
| GI_8922706-S | 587.2  | 514.7  | 519.9  | FLJ10846  | <a href="#">NM_018241.1</a> |                                     |           |                         |
| GI_8922715-S | 260.2  | 303.6  | 248.2  | FLJ10851  | <a href="#">NM_018245.1</a> |                                     | oxidoredu | metabolis               |
| GI_8922717-S | 4099   | 3395.6 | 2562.6 | FLJ10853  | <a href="#">NM_018246.1</a> |                                     |           |                         |
| GI_8922719-S | 398    | 599.5  | 567.5  | C6orf67   | <a href="#">NM_018247.1</a> | FLJ10856                            |           |                         |

|              |        |        |        |           |                             |                                    |  |            |             |            |
|--------------|--------|--------|--------|-----------|-----------------------------|------------------------------------|--|------------|-------------|------------|
| GI_8922721-S | 96.2   | 98.7   | 99.9   | FLJ10858  | <a href="#">NM_018248.1</a> | hFPG2                              |  |            |             | DNA        |
| GI_8922725-S | 797.1  | 791.8  | 687    | FLJ10871  | <a href="#">NM_018250.1</a> |                                    |  |            |             |            |
| GI_8922727-S | 136.7  | 146.3  | 131.3  | FLJ10874  | <a href="#">NM_018252.1</a> |                                    |  |            |             |            |
| GI_8922734-S | 1634.9 | 1807.9 | 1482.6 | STATIP1   | <a href="#">NM_018255.1</a> | ELP2;FLJ10879                      |  |            |             |            |
| GI_8922738-S | 601.1  | 512.2  | 574.8  | C20orf36  | <a href="#">NM_018257.1</a> | FLJ10883                           |  | protein-L- |             | protein    |
| GI_8922743-S | 105.5  | 117.9  | 105.3  | FLJ10891  | <a href="#">NM_018260.1</a> |                                    |  | nucleic    | nucleus     | regulation |
| GI_8922751-S | 818.3  | 735.4  | 733.4  | FLJ10900  | <a href="#">NM_018264.1</a> |                                    |  | flavodoxin |             | electron   |
| GI_8922753-S | 155.2  | 180    | 146.1  | FLJ10901  | <a href="#">NM_018265.1</a> |                                    |  |            |             |            |
| GI_8922755-S | 231.6  | 237.5  | 197.1  | FLJ10902  | <a href="#">NM_018266.1</a> |                                    |  |            |             |            |
| GI_8922761-S | 2234.5 | 2151   | 2800   | SIPL      | <a href="#">NM_018269.1</a> | FLJ10913                           |  |            |             |            |
| GI_8922778-S | 214.6  | 222.4  | 206    | C21orf77  | <a href="#">NM_018277.1</a> | FLJ10932                           |  |            |             |            |
| GI_8922780-S | 206.6  | 254.3  | 232.4  | KIF24     | <a href="#">NM_018278.1</a> |                                    |  |            |             |            |
| GI_8922784-S | 156    | 192.1  | 170.5  | FLJ10945  | <a href="#">NM_018280.1</a> |                                    |  |            |             |            |
| GI_8922786-S | 432.8  | 1176.7 | 396.3  | FLJ10948  | <a href="#">NM_018281.1</a> |                                    |  | catalytic  |             | metabolis  |
| GI_8922788-S | 688.4  | 668    | 671.3  | PSPC1     | <a href="#">NM_018282.1</a> | PSP1;FLJ10955                      |  | nucleic    |             |            |
| GI_8922791-S | 356.6  | 422.6  | 385.3  | NUDT15    | <a href="#">NM_018283.1</a> | MTH2;FLJ10956                      |  |            |             |            |
| GI_8922793-S | 3475.1 | 3388   | 4043.8 | C15orf12  | <a href="#">NM_018285.1</a> | BRMS2;MRPS4;FLJ10968;DKFZp586L0118 |  | structural |             |            |
| GI_8922795-S | 89     | 107.5  | 104    | FLJ10970  | <a href="#">NM_018286.1</a> |                                    |  |            |             |            |
| GI_8922803-S | 722.9  | 613.5  | 422.6  | PGM2      | <a href="#">NM_018290.1</a> | FLJ10983                           |  | transporte |             | transport  |
| GI_8922809-S | 108.9  | 115.8  | 103.8  | FLJ10997  | <a href="#">NM_018293.1</a> | FLJ21142                           |  |            |             |            |
| GI_8922813-S | 120.2  | 117.5  | 108    | FLJ11000  | <a href="#">NM_018295.1</a> |                                    |  |            |             |            |
| GI_8922821-S | 888.2  | 1077   | 740.7  | FLJ11011  | <a href="#">NM_018299.1</a> |                                    |  |            |             |            |
| GI_8922827-S | 113    | 109.7  | 93.2   | FLJ11017  | <a href="#">NM_018302.1</a> |                                    |  |            |             |            |
| GI_8922831-S | 1023.4 | 1071.4 | 938.6  | FLJ11029  | <a href="#">NM_018304.1</a> |                                    |  |            |             |            |
| GI_8922839-S | 89.4   | 98.3   | 96.2   | ACOXL     | <a href="#">NM_018308.1</a> | FLJ11042                           |  |            |             |            |
| GI_8922841-S | 156.8  | 153.3  | 136.5  | FLJ11046  | <a href="#">NM_018309.1</a> |                                    |  |            |             |            |
| GI_8922853-S | 495.3  | 571.9  | 523    | FLJ11078  | <a href="#">NM_018316.1</a> |                                    |  | protein    |             |            |
| GI_8922855-S | 191.5  | 305.3  | 270.7  | FLJ11082  | <a href="#">NM_018317.1</a> |                                    |  |            |             |            |
| GI_8922866-S | 208    | 209.6  | 206.6  | C6orf64   | <a href="#">NM_018322.1</a> | FLJ11101                           |  |            |             |            |
| GI_8922870-S | 426.8  | 575.5  | 531.8  | FLJ11106  | <a href="#">NM_018324.1</a> |                                    |  |            |             |            |
| GI_8922874-S | 122.2  | 116.6  | 109.1  | C20orf38  | <a href="#">NM_018327.1</a> | FLJ11112                           |  |            |             |            |
| GI_8922878-S | 149.6  | 172.5  | 155    | FLJ11117  | <a href="#">NM_018329.1</a> |                                    |  |            |             |            |
| GI_8922889-S | 505    | 438.2  | 402.9  | C14orf131 | <a href="#">NM_018335.1</a> | FLJ11132                           |  | ATP        | membran     | transport  |
| GI_8922891-S | 258.2  | 358.6  | 294.6  | FLJ11136  | <a href="#">NM_018336.1</a> |                                    |  |            |             |            |
| GI_8922900-S | 125.9  | 171.1  | 127.2  | FLJ11151  | <a href="#">NM_018340.1</a> |                                    |  | hydrolase  |             |            |
| GI_8922904-S | 665.4  | 593.9  | 623.2  | RIOK2     | <a href="#">NM_018343.1</a> | FLJ11159                           |  | molecular  |             |            |
| GI_8922910-S | 668.7  | 499.3  | 418.5  | FLJ11164  | <a href="#">NM_018346.1</a> |                                    |  | coproporp  | cytoplasm   | porphyrin  |
| GI_8922912-S | 477    | 560    | 489.8  | C20orf29  | <a href="#">NM_018347.1</a> | FLJ11168                           |  |            |             |            |
| GI_8922916-S | 160.3  | 593.8  | 529.4  | FLJ11175  | <a href="#">NM_018349.1</a> |                                    |  |            |             |            |
| GI_8922918-S | 114.8  | 126.4  | 120.5  | FLJ11181  | <a href="#">NM_018350.1</a> |                                    |  |            |             |            |
| GI_8922922-S | 125.7  | 126.6  | 109.6  | FLJ11184  | <a href="#">NM_018352.1</a> |                                    |  |            |             |            |
| GI_8922926-S | 447.3  | 436.8  | 161.7  | C20orf46  | <a href="#">NM_018354.1</a> | FLJ11190                           |  |            | integral to |            |
| GI_8922930-S | 485.3  | 511.5  | 500.7  | FLJ11193  | <a href="#">NM_018356.1</a> |                                    |  |            |             |            |
| GI_8922935-S | 227.3  | 282.5  | 311.3  | ABCF3     | <a href="#">NM_018358.1</a> | FLJ11198;EST201864                 |  | nucleotide | membran     | transport  |

|              |        |        |        |           |                             |                       |            |              |              |
|--------------|--------|--------|--------|-----------|-----------------------------|-----------------------|------------|--------------|--------------|
| GI_8922937-S | 1306.2 | 1015   | 931.4  | FLJ11200  | <a href="#">NM_018359.1</a> |                       |            |              |              |
| GI_8922939-S | 136.8  | 131.4  | 126.8  | CXorf15   | <a href="#">NM_018360.1</a> | LSR5;FLJ11209         |            |              |              |
| GI_8922941-S | 974.6  | 881.4  | 690.5  | LPAAT-e   | <a href="#">NM_018361.1</a> | FLJ11210              | acyltransf | integral to  | metabolis    |
| GI_8922945-S | 94.9   | 99.9   | 90.9   | FLJ11218  | <a href="#">NM_018363.1</a> |                       |            |              |              |
| GI_8922949-S | 122.5  | 139.3  | 162.6  | MNS1      | <a href="#">NM_018365.1</a> | FLJ11222              |            |              |              |
| GI_8922957-S | 1544.8 | 1213.1 | 1340.4 | FLJ11259  | <a href="#">NM_018370.1</a> |                       | nucleic    |              |              |
| GI_8922963-S | 355.3  | 528.5  | 383.4  | SYNJ2BP   | <a href="#">NM_018373.1</a> | Arip2;FLJ11271        | protein    | mitochond    | intracellula |
| GI_8922978-S | 606.8  | 708.1  | 590.7  | FLJ11286  | <a href="#">NM_018381.1</a> |                       |            |              |              |
| GI_8922980-S | 108.8  | 113    | 97.5   | FLJ11292  | <a href="#">NM_018382.1</a> |                       |            |              |              |
| GI_8922986-S | 1829.2 | 1496.4 | 1215.5 | FLJ11305  | <a href="#">NM_018386.1</a> |                       |            |              |              |
| GI_8922994-S | 353.6  | 276.9  | 252.3  | FLJ11323  | <a href="#">NM_018390.1</a> |                       | phospholi  |              | intracellula |
| GI_8923000-S | 739.3  | 744    | 779.9  | FLJ11342  | <a href="#">NM_018394.1</a> |                       | catalytic  |              |              |
| GI_8923004-S | 336.9  | 295.5  | 267.4  | METTL2    | <a href="#">NM_018396.1</a> | METL;PSENIP1;FLJ11350 |            |              |              |
| GI_8923008-S | 2092.8 | 1683.3 | 2107.9 | C10orf86  | <a href="#">NM_017615.1</a> | FLJ20003;bA500G22.3   | DNA        | nucleus      | regulation   |
| GI_8923014-S | 564    | 803.4  | 653.2  | FLJ20006  | <a href="#">NM_017618.1</a> |                       |            |              |              |
| GI_8923020-S | 849.4  | 1106.7 | 1526.9 | FLJ20014  | <a href="#">NM_017622.1</a> | PRO2472               |            |              |              |
| GI_8923025-S | 115.6  | 117.7  | 114.9  | FLJ20019  | <a href="#">NM_017624.1</a> |                       |            |              |              |
| GI_8923035-S | 187.5  | 233    | 203.3  | C14orf113 | <a href="#">NM_017630.1</a> |                       |            |              |              |
| GI_8923039-S | 322.2  | 381.5  | 345.7  | CARF      | <a href="#">NM_017632.1</a> | FLJ20036              | double-    |              | intracellula |
| GI_8923041-S | 708.7  | 1073.1 | 873.7  | C6orf37   | <a href="#">NM_017633.1</a> | FLJ20037              |            |              |              |
| GI_8923052-S | 146.5  | 152.5  | 154    | FLJ20045  | <a href="#">NM_017638.1</a> |                       |            |              |              |
| GI_8923054-S | 240    | 312.7  | 271    | FLJ20047  | <a href="#">NM_017639.1</a> |                       | calcium    | membran      | homophili    |
| GI_8923058-S | 249.3  | 293.2  | 261.1  | MBTD1     | <a href="#">NM_017643.1</a> | SA49P01;FLJ20055      |            |              |              |
| GI_8923076-S | 813.7  | 651.1  | 678.8  | ZNF586    | <a href="#">NM_017652.1</a> | FLJ20070              | nucleic    | intracellula | regulation   |
| GI_8923085-S | 197.4  | 186.6  | 196.2  | ZNF562    | <a href="#">NM_017656.1</a> | FLJ20079              |            |              | nucleus      |
| GI_8923089-S | 267.3  | 296.5  | 257.6  | BTBD5     | <a href="#">NM_017658.1</a> | FLJ20081              | protein    |              |              |
| GI_8923091-S | 144.4  | 166.2  | 163.5  | FLJ20084  | <a href="#">NM_017659.1</a> |                       |            |              |              |
| GI_8923103-S | 428.9  | 447.2  | 278.7  | ANKRD10   | <a href="#">NM_017664.1</a> | FLJ20093              |            |              |              |
| GI_8923105-S | 311.9  | 318.2  | 295.2  | ZCCHC10   | <a href="#">NM_017665.1</a> | FLJ20094              | nucleic    |              |              |
| GI_8923109-S | 772.4  | 724.9  | 804.3  | NDE1      | <a href="#">NM_017668.1</a> | NUDE;NUDE1;FLJ20101   |            |              |              |
| GI_8923113-S | 1982.5 | 2277.4 | 2564.3 | OTUB1     | <a href="#">NM_017670.1</a> | OTB1;OTU1;FLJ20113    |            |              |              |
| GI_8923119-S | 138.9  | 133.2  | 132.3  | FLJ20123  | <a href="#">NM_017674.1</a> |                       |            |              |              |
| GI_8923123-S | 251.2  | 265.8  | 239.1  | FLJ20125  | <a href="#">NM_017676.1</a> |                       | DNA        |              | DNA          |
| GI_8923128-S | 123.4  | 139    | 127.6  | C11orf33  | <a href="#">NM_017678.1</a> | FLJ20127              |            |              |              |
| GI_8923134-S | 199.5  | 238.2  | 217.9  | FLJ20130  | <a href="#">NM_017681.1</a> |                       |            |              |              |
| GI_8923136-S | 191    | 248.2  | 213.9  | VMD2L1    | <a href="#">NM_017682.1</a> | FLJ20132              | molecular  | integral to  | biological_  |
| GI_8923140-S | 89.7   | 89.2   | 102.1  | FLJ20139  | <a href="#">NM_017685.1</a> |                       |            |              |              |
| GI_8923142-S | 193.9  | 218.4  | 181    | GDAP2     | <a href="#">NM_017686.1</a> | FLJ20142              |            |              |              |
| GI_8923144-S | 70.5   | 78.4   | 76.3   | FLJ20147  | <a href="#">NM_017687.1</a> |                       |            |              |              |
| GI_8923147-S | 95.3   | 99.3   | 85.7   | BSPRY     | <a href="#">NM_017688.1</a> | FLJ20150              | zinc ion   |              | intracellula |
| GI_8923149-S | 185.2  | 205.7  | 188.3  | FLJ20151  | <a href="#">NM_017689.1</a> |                       |            |              |              |
| GI_8923153-S | 391.3  | 341.2  | 274.4  | FLJ20156  | <a href="#">NM_017691.1</a> |                       |            |              |              |
| GI_8923164-S | 136.9  | 133    | 132.4  | C6orf61   | <a href="#">NM_017696.1</a> |                       |            |              |              |
| GI_8923166-S | 148.3  | 162.6  | 156.4  | FLJ20171  | <a href="#">NM_017697.1</a> |                       | nucleic    |              |              |



|              |        |        |        |          |                             |                                 |             |              |                     |
|--------------|--------|--------|--------|----------|-----------------------------|---------------------------------|-------------|--------------|---------------------|
| GI_8923170-S | 136.7  | 157    | 152.5  | FLJ20174 | <a href="#">NM_017699.1</a> | SID1                            |             |              |                     |
| GI_8923172-S | 111.9  | 122.1  | 114.6  | FLJ20184 | <a href="#">NM_017700.1</a> |                                 |             |              |                     |
| GI_8923176-S | 550.9  | 653.9  | 807.1  | FLJ20186 | <a href="#">NM_017702.1</a> |                                 |             |              |                     |
| GI_8923178-S | 1029.3 | 878.7  | 842.6  | FBXL12   | <a href="#">NM_017703.1</a> | FLJ20188                        |             |              |                     |
| GI_8923189-S | 120.6  | 112.3  | 119.9  | FLJ20200 | <a href="#">NM_017708.1</a> |                                 |             |              |                     |
| GI_8923197-S | 128.5  | 148    | 153.7  | PGPEP1   | <a href="#">NM_017712.1</a> | PGP;Pcp;PGPI;PGP-I;FLJ20208     | pyrogluta   |              | proteolysis         |
| GI_8923199-S | 104.9  | 105.6  | 102.1  | FLJ20211 | <a href="#">NM_017713.1</a> |                                 |             |              |                     |
| GI_8923201-S | 256.7  | 344.4  | 204.9  | C20orf13 | <a href="#">NM_017714.1</a> | FLJ20212;dJ585I14.2             | asparagin   |              | glycoprote          |
| GI_8923203-A | 297.7  | 358.6  | 293.5  | ZNF3     | <a href="#">NM_017715.1</a> | A8-                             |             |              |                     |
| GI_8923203-I | 122.5  | 139.5  | 114.3  | ZNF3     | <a href="#">NM_017715.1</a> | A8-                             |             |              |                     |
| GI_8923205-S | 233.3  | 297.8  | 257.5  | MS4A12   | <a href="#">NM_017716.1</a> | Ms4a10;FLJ20217                 | receptor    |              | integral to         |
| GI_8923213-S | 369.5  | 230.9  | 174.9  | STAP2    | <a href="#">NM_017720.1</a> | BKS;STAP-2;FLJ20234             |             |              |                     |
| GI_8923220-S | 414.3  | 418.8  | 561.1  | FLJ20245 | <a href="#">NM_017723.1</a> |                                 | nucleotide  |              |                     |
| GI_8923223-A | 423.7  | 421    | 347    | LRRFIP2  | <a href="#">NM_017724.1</a> | HUFI-2;FLJ20248                 |             |              |                     |
| GI_8923223-I | 671.3  | 741.9  | 550.6  | LRRFIP2  | <a href="#">NM_017724.1</a> | HUFI-2;FLJ20248                 |             |              |                     |
| GI_8923229-S | 151.6  | 165.3  | 187.9  | FLJ20255 | <a href="#">NM_017728.1</a> |                                 | amino       | membran      | amino               |
| GI_8923248-S | 199.3  | 204.7  | 163.6  | TOCA1    | <a href="#">NM_017737.1</a> | FLJ20275                        |             |              | intracellula signal |
| GI_8923250-S | 390.9  | 457.3  | 452.8  | C9orf39  | <a href="#">NM_017738.1</a> | FLJ20276                        | two-        | membran      | signal              |
| GI_8923252-S | 3580.5 | 4310.4 | 4680.8 | FLJ20277 | <a href="#">NM_017739.1</a> | MEB;GnTI.2;MGAT1.2;POMGNT1;UDP- | alpha-1,3-  | Golgi        | N-linked            |
| GI_8923254-S | 1877.9 | 1958.5 | 1372.9 | ZDHHC7   | <a href="#">NM_017740.1</a> | ZNF370;FLJ10792;FLJ20279        | zinc ion    | integral to  | regulation          |
| GI_8923256-S | 231.4  | 226.3  | 220.3  | FLJ20280 | <a href="#">NM_017741.1</a> |                                 |             |              |                     |
| GI_8923268-S | 2546.7 | 2091.3 | 1729.3 | TEX10    | <a href="#">NM_017746.1</a> | FLJ20287;bA208F1.2              |             |              |                     |
| GI_8923276-I | 131.4  | 149.4  | 144.9  | FLJ20297 | <a href="#">NM_017751.1</a> | FLJ20756                        |             |              |                     |
| GI_8923280-S | 101    | 112.7  | 111.2  | PRG-3    | <a href="#">NM_017753.1</a> | FLJ20300                        |             |              |                     |
| GI_8923286-S | 79.3   | 89.6   | 92.6   | FLJ20306 | <a href="#">NM_017756.1</a> |                                 |             |              |                     |
| GI_8923288-S | 98.5   | 95.8   | 91.4   | ZNF407   | <a href="#">NM_017757.1</a> | FLJ13839;FLJ20307;KIAA1703      |             |              |                     |
| GI_8923296-S | 103    | 128.1  | 122.7  | FLJ20313 | <a href="#">NM_017762.1</a> |                                 |             |              |                     |
| GI_8923298-S | 122.5  | 320.2  | 164.2  | FLJ20315 | <a href="#">NM_017763.1</a> | RNF124                          | DNA         | nucleus      | regulation          |
| GI_8923300-S | 158.1  | 153.9  | 149.9  | PQLC2    | <a href="#">NM_017765.1</a> | FLJ20320                        |             |              |                     |
| GI_8923304-I | 100.9  | 92.5   | 90.9   | SLC39A4  | <a href="#">NM_017767.1</a> | AEZ;ZIP4;FLJ20327               | metal ion   | membran      | metal ion           |
| GI_8923315-S | 115    | 116.1  | 116.7  | LAX      | <a href="#">NM_017773.1</a> | FLJ20340                        |             |              |                     |
| GI_8923317-S | 274.6  | 324.5  | 290.3  | CDKAL1   | <a href="#">NM_017774.1</a> | FLJ20342                        | molecular   |              |                     |
| GI_8923321-S | 289.6  | 234    | 197.9  | FLJ20344 | <a href="#">NM_017776.1</a> |                                 | nucleic     | intracellula | regulation          |
| GI_8923323-S | 500.3  | 534.2  | 505.2  | FLJ20345 | <a href="#">NM_017777.1</a> |                                 |             |              |                     |
| GI_8923331-S | 107.1  | 111    | 91.7   | FLJ20359 | <a href="#">NM_017781.1</a> | CYP2W1                          | monooxyg    |              | electron            |
| GI_8923340-S | 344.6  | 286.1  | 278.9  | FLJ20366 | <a href="#">NM_017786.1</a> |                                 |             | kinesin      |                     |
| GI_8923349-S | 314.7  | 306.7  | 581.9  | C14orf58 | <a href="#">NM_017791.1</a> | FLJ20371                        |             |              |                     |
| GI_8923351-S | 2045.3 | 1804.5 | 1103.6 | FLJ20373 | <a href="#">NM_017792.1</a> |                                 |             |              |                     |
| GI_8923354-S | 140.3  | 149.7  | 147.5  | RPP25    | <a href="#">NM_017793.1</a> | FLJ20374                        | DNA         | nucleus      | regulation          |
| GI_8923377-S | 601    | 678.5  | 662.4  | FLJ20406 | <a href="#">NM_017806.1</a> | dJ583P15.4                      |             |              |                     |
| GI_8923379-S | 512.5  | 452.6  | 356.5  | OSGEP    | <a href="#">NM_017807.1</a> | GCPL1;OSGEP1;PRSMG1;FLJ20411    | peptidase   |              | proteolysis         |
| GI_8923381-S | 111.8  | 98.7   | 101.5  | FLJ20413 | <a href="#">NM_017808.1</a> |                                 |             |              |                     |
| GI_8923389-S | 3823.6 | 4111.7 | 4073.6 | CHCHD3   | <a href="#">NM_017812.1</a> | FLJ20420                        |             |              |                     |
| GI_8923391-S | 765    | 1545   | 1345.5 | FLJ20421 | <a href="#">NM_017813.1</a> |                                 | inositol/ph |              |                     |

|              |        |        |        |          |                             |                                      |                       |                     |
|--------------|--------|--------|--------|----------|-----------------------------|--------------------------------------|-----------------------|---------------------|
| GI_8923393-S | 3666.2 | 3823.3 | 2985.3 | FLJ20422 | <a href="#">NM_017814.1</a> |                                      |                       |                     |
| GI_8923395-S | 1938   | 1247.9 | 1288.5 | C14orf94 | <a href="#">NM_017815.1</a> | FLJ20424                             |                       |                     |
| GI_8923397-S | 1703.5 | 1161.1 | 773.8  | LYAR     | <a href="#">NM_017816.1</a> | FLJ20425                             |                       |                     |
| GI_8923400-S | 307.4  | 628    | 311.1  | RAB20    | <a href="#">NM_017817.1</a> | FLJ20429                             | small                 | small               |
| GI_8923404-S | 546    | 582.7  | 500.3  | RG9MTD1  | <a href="#">NM_017819.1</a> | FLJ20432                             |                       |                     |
| GI_8923410-S | 1646.3 | 1595.5 | 1255.1 | FLJ20436 | <a href="#">NM_017822.1</a> | FLJ12670                             |                       |                     |
| GI_8923416-S | 2572.9 | 2085.4 | 1507.3 | ADPRHL2  | <a href="#">NM_017825.1</a> | ARH3;FLJ20446                        | hydrolase             |                     |
| GI_8923418-S | 129.4  | 144.4  | 126.6  | FLJ20449 | <a href="#">NM_017826.1</a> |                                      |                       |                     |
| GI_8923426-S | 435.3  | 387.1  | 352.6  | OCIA     | <a href="#">NM_017830.1</a> | FLJ20455                             |                       |                     |
| GI_8923434-S | 184.3  | 244.6  | 230.4  | FLJ20464 | <a href="#">NM_017834.1</a> |                                      |                       |                     |
| GI_8923436-I | 265.9  | 315.5  | 294.1  | C21orf59 | <a href="#">NM_017835.1</a> | C21orf48;FLJ20467                    |                       |                     |
| GI_8923445-S | 348.2  | 439.9  | 369.5  | FLJ20481 | <a href="#">NM_017839.1</a> |                                      | acyltransf            | metabolis           |
| GI_8923449-S | 1200.1 | 974.4  | 1300.6 | FLJ20487 | <a href="#">NM_017841.1</a> |                                      | peroxidase            | electron            |
| GI_8923451-S | 282.6  | 251    | 230    | FLJ20489 | <a href="#">NM_017842.1</a> |                                      |                       |                     |
| GI_8923455-A | 141.4  | 147.6  | 142.3  | ANKMY1   | <a href="#">NM_017844.1</a> | ZMYND13;FLJ20499                     |                       |                     |
| GI_8923455-I | 173.5  | 180.9  | 177.4  | ANKMY1   | <a href="#">NM_017844.1</a> | ZMYND13;FLJ20499                     |                       |                     |
| GI_8923465-S | 236.6  | 258    | 280.8  | FLJ20507 | <a href="#">NM_017849.1</a> | FLJ22257                             |                       |                     |
| GI_8923468-S | 597.9  | 429.7  | 362    | FLJ20508 | <a href="#">NM_017850.1</a> |                                      |                       |                     |
| GI_8923472-S | 128.8  | 151    | 139.4  | NALP2    | <a href="#">NM_017852.1</a> | PYPAF2;FLJ20510                      |                       |                     |
| GI_8923474-S | 371    | 329.7  | 229.9  | FLJ20511 | <a href="#">NM_017853.1</a> |                                      | electron              | spliceoso electron  |
| GI_8923476-S | 902    | 785.4  | 974.4  | FLJ20512 | <a href="#">NM_017854.1</a> |                                      |                       |                     |
| GI_8923480-S | 144.4  | 145.4  | 121.8  | FLJ20514 | <a href="#">NM_017856.1</a> |                                      |                       |                     |
| GI_8923484-S | 216.5  | 215.2  | 201.8  | FLJ20516 | <a href="#">NM_017858.1</a> |                                      |                       |                     |
| GI_8923486-S | 591.2  | 758.9  | 1051.5 | URKL1    | <a href="#">NM_017859.1</a> | FLJ20517                             | uridine               | carbohydr           |
| GI_8923495-S | 581.7  | 599.3  | 452.4  | FLJ20530 | <a href="#">NM_017864.1</a> |                                      |                       |                     |
| GI_8923502-S | 1032.9 | 810.5  | 822.8  | FLJ20534 | <a href="#">NM_017867.1</a> |                                      |                       |                     |
| GI_8923519-S | 757.9  | 661.8  | 632.9  | FLJ20551 | <a href="#">NM_017875.1</a> |                                      | binding               | mitochond transport |
| GI_8923525-S | 113.7  | 147.1  | 120    | HRASLS2  | <a href="#">NM_017878.1</a> | FLJ20556                             |                       |                     |
| GI_8923527-S | 845.8  | 727.3  | 670.9  | FLJ20558 | <a href="#">NM_017880.1</a> |                                      | cysteine-<br>uridine  | proteolysis         |
| GI_8923529-S | 397    | 480.8  | 379    | C9orf95  | <a href="#">NM_017881.1</a> | FLJ20559                             |                       |                     |
| GI_8923531-S | 1116.4 | 1147.4 | 1303.9 | CLN6     | <a href="#">NM_017882.1</a> | FLJ20561                             |                       | integral to         |
| GI_8923535-S | 7082.6 | 5171.6 | 6495.8 | HCFC1R1  | <a href="#">NM_017885.1</a> | HPIP;FLJ20568                        |                       |                     |
| GI_8923538-S | 187.7  | 202.4  | 195.8  | FLJ20574 | <a href="#">NM_017886.1</a> |                                      |                       |                     |
| GI_8923540-S | 1012.1 | 944.4  | 873    | FLJ20580 | <a href="#">NM_017887.1</a> |                                      |                       |                     |
| GI_8923558-S | 385.9  | 394.6  | 336.6  | FLJ20604 | <a href="#">NM_017897.1</a> |                                      | structural<br>calcium | ribosome protein    |
| GI_8923562-S | 174    | 160.5  | 134.3  | TSC      | <a href="#">NM_017899.1</a> | FLJ20607                             |                       |                     |
| GI_8923564-S | 1863.7 | 2052.4 | 1948.2 | AKIP     | <a href="#">NM_017900.1</a> | AIP;FLJ20608                         |                       |                     |
| GI_8923568-S | 632    | 789.2  | 821    | HIF1AN   | <a href="#">NM_017902.1</a> | FIH1;FLJ20615;FLJ22027;DKFZp762F1811 |                       |                     |
| GI_8923572-S | 226.7  | 270.8  | 251.6  | FLJ20619 | <a href="#">NM_017904.1</a> |                                      |                       |                     |
| GI_8923576-S | 1031   | 765.4  | 591.1  | PAK1IP1  | <a href="#">NM_017906.1</a> | PIP1;hPIP1;FLJ20624;bA421M1.5        |                       |                     |
| GI_8923578-S | 2564.8 | 3383.5 | 3589.1 | FLJ20625 | <a href="#">NM_017907.1</a> |                                      |                       |                     |
| GI_8923581-S | 753.7  | 823.4  | 811.3  | FLJ20626 | <a href="#">NM_017908.1</a> |                                      |                       |                     |
| GI_8923583-S | 399.8  | 356.7  | 268.7  | C6orf96  | <a href="#">NM_017909.1</a> | FLJ20627;bA351K16.3                  |                       |                     |
| GI_8923587-S | 185.8  | 201.6  | 180.7  | FLJ20635 | <a href="#">NM_017911.1</a> |                                      |                       |                     |

|              |        |        |                 |                             |                        |  |             |                         |
|--------------|--------|--------|-----------------|-----------------------------|------------------------|--|-------------|-------------------------|
| GI_8923591-S | 600.5  | 807.5  | 645 HARC        | <a href="#">NM_017913.1</a> | FLJ20639               |  |             | cytokinesi              |
| GI_8923595-S | 397.7  | 339.3  | 398.5 FLJ20641  | <a href="#">NM_017915.1</a> |                        |  |             |                         |
| GI_8923597-S | 7054   | 8312.6 | 7628.3 FLJ20643 | <a href="#">NM_017916.1</a> |                        |  |             |                         |
| GI_8923603-S | 132.3  | 146.7  | 142.9 STX17     | <a href="#">NM_017919.1</a> | FLJ20651               |  | kinesin     | transport               |
| GI_8923608-S | 581    | 757.9  | 806.3 NPL4      | <a href="#">NM_017921.1</a> | FLJ20657;KIAA1499      |  |             |                         |
| GI_8923612-S | 105    | 101.2  | 95.9 FLJ20668   | <a href="#">NM_017923.1</a> |                        |  |             |                         |
| GI_8923622-S | 105    | 111.8  | 115.8 FLJ20694  | <a href="#">NM_017928.1</a> |                        |  |             |                         |
| GI_8923627-S | 351.6  | 372.9  | 391.9 FLJ20699  | <a href="#">NM_017931.1</a> |                        |  |             |                         |
| GI_8923629-S | 646.2  | 894.3  | 726.7 FLJ20700  | <a href="#">NM_017932.1</a> |                        |  |             |                         |
| GI_8923640-S | 124.1  | 115.9  | 113.4 FLJ20712  | <a href="#">NM_017937.1</a> |                        |  |             |                         |
| GI_8923658-S | 290.6  | 386    | 338.5 FKBP14    | <a href="#">NM_017946.1</a> | FKBP22;FLJ20731        |  | cyclophilin | endoplas protein        |
| GI_8923660-S | 1626.2 | 1609.6 | 714.8 MOCOS     | <a href="#">NM_017947.1</a> | MOS;HMCS;FLJ20733      |  |             |                         |
| GI_8923664-S | 936.6  | 723    | 990.5 CUEDC1    | <a href="#">NM_017949.1</a> | FLJ20739               |  |             |                         |
| GI_8923675-S | 825.5  | 657.7  | 671.7 FLJ20772  | <a href="#">NM_017956.1</a> |                        |  |             |                         |
| GI_8923677-S | 259.3  | 302.4  | 293.6 EPN3      | <a href="#">NM_017957.1</a> | FLJ20778               |  |             |                         |
| GI_8923679-S | 311.2  | 338.1  | 371 PLEKHB2     | <a href="#">NM_017958.1</a> | EVT2;FLJ20783          |  |             |                         |
| GI_8923681-S | 189.8  | 214.9  | 199.3 FLJ20802  | <a href="#">NM_017959.1</a> |                        |  |             |                         |
| GI_8923683-S | 127.6  | 155.9  | 142.2 FLJ20808  | <a href="#">NM_017960.1</a> |                        |  |             |                         |
| GI_8923687-S | 93.6   | 97.5   | 91.1 FLJ20825   | <a href="#">NM_017962.1</a> |                        |  |             |                         |
| GI_8923696-S | 3271.6 | 2907.9 | 3057.4 FLJ20850 | <a href="#">NM_017967.1</a> |                        |  |             |                         |
| GI_8923700-S | 158.6  | 408.7  | 383.8 GPR48     | <a href="#">NM_018490.1</a> | LGR4                   |  | G-protein   | integral to G-protein   |
| GI_8923704-S | 108.5  | 123.1  | 107.3 GPRC5D    | <a href="#">NM_018654.1</a> |                        |  | metabotro   | membran vision          |
| GI_8923711-S | 1484.7 | 1426   | 1483.7 ACTR10   | <a href="#">NM_018477.1</a> | HARP11                 |  | structural  | actin                   |
| GI_8923719-S | 126    | 164.6  | 123.4 HCA127    | <a href="#">NM_018684.1</a> |                        |  |             |                         |
| GI_8923721-S | 2561.5 | 2406.6 | 2066.1 HCA66    | <a href="#">NM_018428.1</a> |                        |  |             | intracellula RNA        |
| GI_8923736-S | 617.3  | 630.9  | 782.9 NAGK      | <a href="#">NM_017567.1</a> | GNK;HSA242910          |  | ATP         | N-                      |
| GI_8923741-S | 205    | 283    | 222 CHRNA9      | <a href="#">NM_017581.1</a> | NACHRA9;HSA243342      |  | extracellul | integral to ion         |
| GI_8923753-S | 258    | 326.8  | 272.8 HSA250839 | <a href="#">NM_018401.1</a> |                        |  | protein     | protein                 |
| GI_8923755-S | 102.2  | 121.2  | 125.2 IL26      | <a href="#">NM_018402.1</a> | AK155;IL-26            |  | cytokine    | soluble cell-cell       |
| GI_8923762-S | 108.3  | 129.5  | 107.2 CENTA2    | <a href="#">NM_018404.1</a> | HSA272195              |  | GTPase      | nucleus biological_     |
| GI_8923764-S | 93.8   | 123.9  | 100.2 CACNA2D3  | <a href="#">NM_018398.1</a> | HSA272268              |  |             | membran                 |
| GI_8923766-S | 422.8  | 293.8  | 184.6 HSA275986 | <a href="#">NM_018403.1</a> | SMIF;DCP1A             |  |             |                         |
| GI_8923768-S | 426.3  | 535.3  | 439.5 HDAC8     | <a href="#">NM_018486.1</a> | RPD3;HDACL1            |  | histone     | nuclear chromatin       |
| GI_8923770-S | 747.6  | 835.6  | 711.2 HSA277841 | <a href="#">NM_018553.1</a> |                        |  |             |                         |
| GI_8923788-S | 235.6  | 280.9  | 244.1 HSRNAFEV  | <a href="#">NM_017521.1</a> | FEV;PET-1              |  | transcripti | nucleus transcripti     |
| GI_8923792-S | 102    | 108.1  | 91.8 PLXN3      | <a href="#">NM_017514.1</a> | HSSEXGENE              |  |             |                         |
| GI_8923805-S | 104.5  | 99.7   | 84.2 HT009      | <a href="#">NM_018470.1</a> |                        |  |             |                         |
| GI_8923807-S | 2235.1 | 2159   | 1881.9 LEREPO4  | <a href="#">NM_018471.1</a> | HT010                  |  | nucleic     |                         |
| GI_8923809-S | 1434.1 | 1538.9 | 1552.7 HT011    | <a href="#">NM_018472.1</a> |                        |  |             |                         |
| GI_8923818-S | 180.5  | 173.6  | 143.7 IMPACT    | <a href="#">NM_018439.1</a> |                        |  | molecular   | cellular_co biological_ |
| GI_8923829-S | 356.8  | 454.1  | 382 LENEP       | <a href="#">NM_018655.1</a> | LEP503                 |  | DNA         | developm                |
| GI_8923837-S | 105.9  | 112.5  | 105.2 LOC55580  | <a href="#">NM_017571.1</a> |                        |  |             |                         |
| GI_8923845-S | 126.5  | 138.4  | 123.3 TSNAXIP1  | <a href="#">NM_018430.1</a> | TXI1                   |  |             |                         |
| GI_8923850-A | 100.4  | 95.6   | 102 ZNF302      | <a href="#">NM_018443.1</a> | ZNF327;ZNF135L;ZNF140L |  | DNA         | nucleus regulation      |

|              |        |        |        |          |                             |                        |             |              |            |
|--------------|--------|--------|--------|----------|-----------------------------|------------------------|-------------|--------------|------------|
| GI_8923850-I | 165.8  | 193.9  | 146.2  | ZNF302   | <a href="#">NM_018443.1</a> | ZNF327;ZNF135L;ZNF140L | DNA         | nucleus      | regulation |
| GI_8923854-A | 1202.8 | 1564.3 | 1203.9 | AD-017   | <a href="#">NM_018446.1</a> | FLJ14611               |             |              |            |
| GI_8923854-I | 269.1  | 353.8  | 267.4  | AD-017   | <a href="#">NM_018446.1</a> | FLJ14611               |             |              |            |
| GI_8923856-S | 1285.7 | 1511.4 | 1457.5 | LOC55831 | <a href="#">NM_018447.1</a> |                        |             |              |            |
| GI_8923863-S | 773.2  | 834.9  | 694    | ECHDC1   | <a href="#">NM_018479.1</a> | dJ351K20.2             | catalytic   |              | metabolis  |
| GI_8923872-S | 140.6  | 169.4  | 163    | GPR77    | <a href="#">NM_018485.1</a> | C5L2                   | C5a         | integral to  | G-protein  |
| GI_8923886-S | 348.3  | 365.9  | 299.7  | PBF      | <a href="#">NM_018660.1</a> | PRF1;HDBP2             |             |              |            |
| GI_8923891-S | 594.3  | 682    | 819.1  | PXMP2    | <a href="#">NM_018663.1</a> | PMP22                  |             | peroxisom    |            |
| GI_8923906-A | 5820.3 | 5680.7 | 4882.3 | ARL6IP4  | <a href="#">NM_018694.1</a> | SR-25;SRp25            |             | nucleus      | RNA        |
| GI_8923906-I | 98.1   | 113.2  | 109.2  | ARL6IP4  | <a href="#">NM_018694.1</a> | SR-25;SRp25            |             | nucleus      | RNA        |
| GI_8923908-S | 1660.9 | 1424.2 | 897.4  | ERBB2IP  | <a href="#">NM_018695.1</a> | ERBIN                  |             | basement     | oncogene   |
| GI_8923919-S | 209.2  | 504.6  | 122.1  | H2AFY2   | <a href="#">NM_018649.1</a> | MACROH2A2              |             |              |            |
| GI_8923929-S | 809.2  | 868.4  | 705.8  | C10orf70 | <a href="#">NM_018464.1</a> | MDS029                 |             |              |            |
| GI_8923931-S | 1072.6 | 1061.8 | 1157.9 | C9orf46  | <a href="#">NM_018465.1</a> | AD025;MDS030;FLJ14688  |             |              |            |
| GI_8923935-S | 751.3  | 847.7  | 706.8  | MDS032   | <a href="#">NM_018467.1</a> |                        |             |              |            |
| GI_8923943-S | 413.8  | 394.2  | 397.9  | NRF      | <a href="#">NM_017544.1</a> | ITBA4                  | double-     | nucleus      | regulation |
| GI_8923945-S | 89.5   | 97.6   | 90.9   | SMPD3    | <a href="#">NM_018667.1</a> | NSMASE2                | sphingom    | membran      | sphingom   |
| GI_8923955-S | 2536.7 | 2712.5 | 2259.5 | PC326    | <a href="#">NM_018442.1</a> |                        |             |              |            |
| GI_8923959-S | 107.5  | 130.9  | 117.2  | PPM2C    | <a href="#">NM_018444.1</a> | PDH;PDP;PDP1           | protein     | mitochond    | protein    |
| GI_8923971-S | 93.8   | 84.3   | 88.6   | PRO0386  | <a href="#">NM_018562.1</a> |                        |             |              |            |
| GI_8923994-S | 205.8  | 233.8  | 211.5  | PRO0943  | <a href="#">NM_018568.1</a> |                        |             |              |            |
| GI_8924004-S | 154.9  | 161    | 157.1  | PRO1051  | <a href="#">NM_018572.1</a> |                        |             |              |            |
| GI_8924025-S | 96.6   | 100.4  | 94.4   | PRO1257  | <a href="#">NM_018578.1</a> |                        |             |              |            |
| GI_8924053-S | 110    | 101.5  | 108.7  | PRO1496  | <a href="#">NM_018603.1</a> |                        |             |              |            |
| GI_8924082-S | 2121.3 | 1949.2 | 1587.3 | PRO1843  | <a href="#">NM_018507.1</a> |                        |             |              |            |
| GI_8924091-S | 92.9   | 93.5   | 96.9   | PRO1866  | <a href="#">NM_018510.1</a> |                        |             |              |            |
| GI_8924095-S | 119.3  | 113    | 110.3  | PRO1905  | <a href="#">NM_018608.1</a> |                        |             |              |            |
| GI_8924099-S | 93.8   | 93.5   | 91.1   | PRO1942  | <a href="#">NM_018610.1</a> |                        |             |              |            |
| GI_8924109-S | 101.1  | 103.9  | 101    | PRO2015  | <a href="#">NM_018512.1</a> |                        |             |              |            |
| GI_8924175-S | 178    | 271.7  | 173.3  | GSDML    | <a href="#">NM_018530.1</a> | PRO2521                |             |              |            |
| GI_8924224-S | 107    | 115.8  | 109.6  | PRO2964  | <a href="#">NM_018547.1</a> |                        |             |              |            |
| GI_8924241-S | 192.5  | 229.5  | 170.3  | SAGE     | <a href="#">NM_018666.1</a> |                        | tumor       |              |            |
| GI_8924245-S | 455.5  | 217.4  | 153.8  | SNFT     | <a href="#">NM_018664.1</a> | JUNDM1                 | transcripti | nucleus      | response   |
| GI_8924257-S | 197.8  | 236.6  | 210.7  | GABRQ    | <a href="#">NM_018558.1</a> | THETA                  | neurotran   | integral to  | signal     |
| GI_8924263-S | 114.9  | 117.7  | 118.3  | ZNF167   | <a href="#">NM_018651.1</a> | ZFP;FLJ12738           |             |              |            |
| GI_9055269-S | 106.1  | 107.6  | 106.8  | LRP1B    | <a href="#">NM_018557.1</a> | LRPDIT;LRP-DIT         | internaliza | membran      | protein    |
| GI_9055283-S | 122.5  | 146.5  | 132.3  | MYO5C    | <a href="#">NM_018728.1</a> |                        | actin       | kinesin      |            |
| GI_9256536-S | 219.8  | 312.9  | 291.1  | MNAB     | <a href="#">NM_018835.1</a> | FLJ20301;FLJ20713      | nucleic     |              |            |
| GI_9257187-A | 115.2  | 115.2  | 127.4  | ADD2     | <a href="#">NM_017487.1</a> | ADD2                   | actin       | membran      |            |
| GI_9257189-I | 156.1  | 177.3  | 181.2  | ADD2     | <a href="#">NM_017488.1</a> | ADD2                   | actin       | membran      |            |
| GI_9257194-S | 150.7  | 186.6  | 168.4  | BAIAP1   | <a href="#">NM_004742.1</a> | AIP3;BAP1;WWP3;MAGI-   | protein C-  | intercellula | cell       |
| GI_9257196-I | 260.5  | 339.6  | 315.6  | BAIAP2   | <a href="#">NM_017450.1</a> | BAP2;IRSP53            | protein C-  | cytoplasm    | insulin    |
| GI_9257198-I | 181.6  | 217.6  | 210.8  | BAIAP2   | <a href="#">NM_017451.1</a> | BAP2;IRSP53            | protein C-  | cytoplasm    | insulin    |
| GI_9257200-S | 237.2  | 283.8  | 241.5  | CALCYON  | <a href="#">NM_015722.2</a> |                        |             | integral to  | dopamine   |

|              |        |        |        |          |                             |                                  |             |             |              |
|--------------|--------|--------|--------|----------|-----------------------------|----------------------------------|-------------|-------------|--------------|
| GI_9257201-I | 207.4  | 160.1  | 145.9  | CLTCL1   | <a href="#">NM_007098.1</a> | CLTD;CLH22;CLTCL                 | signal      | coated pit  | receptor     |
| GI_9257203-S | 929.5  | 1033.3 | 883    | MAEA     | <a href="#">NM_005882.2</a> | EMP                              | cell        | membran     | cell         |
| GI_9257206-I | 403.5  | 469.6  | 447.6  | FOLR1    | <a href="#">NM_016725.1</a> | FBP;FOLR;MOv18;FR-alpha          | folic acid  | peripheral  | receptor     |
| GI_9257214-I | 117.9  | 106    | 128.7  | FOLR1    | <a href="#">NM_016730.1</a> | FBP;FOLR;MOv18;FR-alpha          | folic acid  | peripheral  | receptor     |
| GI_9257218-S | 180.7  | 211.7  | 178.7  | FOLR2    | <a href="#">NM_000803.2</a> | FR-P3;FR-beta;FBP/PL-1;beta-hFR  | folic acid  | membran     | folate       |
| GI_9257219-S | 120.8  | 135.2  | 120.1  | FOLR3    | <a href="#">NM_000804.2</a> | FR-G;FR-gamma;gamma-hFR          | folic acid  | membran     | folate       |
| GI_9257221-S | 772.9  | 636.5  | 724    | FOXO1A   | <a href="#">NM_002015.2</a> | FKH1;FKHR;FOXO1                  | transcripti | nucleus     | anti-        |
| GI_9257223-S | 132.9  | 146.7  | 143.5  | INHA     | <a href="#">NM_002191.2</a> |                                  | hormone     | extracellul | cell         |
| GI_9257224-S | 125.4  | 152.6  | 123.9  | INHBB    | <a href="#">NM_002193.1</a> |                                  | hormone     | extracellul | cell-cell    |
| GI_9257226-S | 129.5  | 139.2  | 115.4  | KLKB1    | <a href="#">NM_000892.2</a> | KLK3                             | plasma      | extracellul | proteolysis  |
| GI_9257227-A | 148.1  | 160.6  | 151.6  | LDHC     | <a href="#">NM_017448.1</a> | LDH3;LDHX                        | L-lactate   |             | glycolysis   |
| GI_9257229-I | 109.7  | 124.4  | 103.2  | LDHC     | <a href="#">NM_002301.2</a> | LDH3;LDHX                        | L-lactate   |             | glycolysis   |
| GI_9257230-S | 140.1  | 133.6  | 108.6  | OCLN     | <a href="#">NM_002538.2</a> |                                  | cell        | tight       | protein      |
| GI_9257231-S | 94.2   | 91.1   | 99.2   | ORM1     | <a href="#">NM_000607.1</a> | ORM;AGP1;AGP-A                   | acute-      | extracellul | acute-       |
| GI_9257235-S | 198.2  | 270.2  | 229.2  | QPCT     | <a href="#">NM_012413.2</a> | QC;GCT                           | acyltransf  |             | protein      |
| GI_9257237-S | 238.4  | 221.8  | 126    | RABL4    | <a href="#">NM_006860.2</a> | RAYL                             | small       |             | small        |
| GI_9257238-S | 156.2  | 204.2  | 154.7  | SC4MOL   | <a href="#">NM_006745.2</a> | DESP4;ERG25                      | C-4         | integral to | steroid      |
| GI_9257239-A | 4862.2 | 6230.4 | 4850.7 | SDFR1    | <a href="#">NM_017455.1</a> | GP55;GP65                        |             |             |              |
| GI_9257241-S | 1222.4 | 1478.1 | 1232.9 | SDHB     | <a href="#">NM_003000.1</a> | IP;SDH;SDH1;SDHIP                | electron    | mitochond   | aerobic      |
| GI_9257243-S | 2647.9 | 3218.9 | 3074   | SDHC     | <a href="#">NM_003001.2</a> | PGL3;SDH3                        | cytochrom   | mitochond   | tricarboxyli |
| GI_9257244-A | 386.4  | 407.8  | 391.7  | TERF1    | <a href="#">NM_003218.2</a> | TRF;PIN2;TRF1;TRBF1;hTRF1-AS     | protein     | telomere    | telomere     |
| GI_9257245-I | 165.9  | 199.3  | 158.1  | TERF1    | <a href="#">NM_017489.1</a> | TRF;PIN2;TRF1;TRBF1;hTRF1-AS     | protein     | telomere    | telomere     |
| GI_9257247-S | 1056.3 | 1276.6 | 1029.6 | TIMP2    | <a href="#">NM_003255.2</a> |                                  | metalloen   |             |              |
| GI_9257255-S | 145.5  | 185.3  | 137.2  | VWF      | <a href="#">NM_000552.2</a> | VWD;F8VWF                        | binding     | secretory   | hemostasi    |
| GI_9257259-S | 126    | 128.5  | 124    | XDH      | <a href="#">NM_000379.2</a> | XO;XOR                           | xanthine    |             | purine       |
| GI_9506400-S | 1141.4 | 1556.5 | 1408.7 | ARHGEF3  | <a href="#">NM_019555.1</a> | GEF3;STA3;XPLN;DKFZP434F2429     | Rho         |             | Rho          |
| GI_9506430-S | 90.4   | 91.3   | 93.5   | C15orf2  | <a href="#">NM_018958.1</a> |                                  | molecular   | cellular_co | spermatog    |
| GI_9506436-S | 417.1  | 374.6  | 385.8  | C21orf45 | <a href="#">NM_018944.1</a> | B28;FASP1;C21orf46               | molecular   | cellular_co | biological_  |
| GI_9506542-S | 612.4  | 835.9  | 815.4  | MOSPD1   | <a href="#">NM_019556.1</a> | DJ473B4                          | structural  |             | cell         |
| GI_9506556-S | 100.9  | 97     | 100.5  | DSCR6    | <a href="#">NM_018962.1</a> |                                  | molecular   | cellular_co | biological_  |
| GI_9506596-S | 123.7  | 149    | 144.3  | FGF21    | <a href="#">NM_019113.1</a> |                                  | fibroblast  | soluble     | signal       |
| GI_9506602-S | 103.9  | 99.7   | 108.1  | SPATA6   | <a href="#">NM_019073.1</a> | SRF1;SRF-1;FLJ10007              |             |             |              |
| GI_9506604-S | 202.4  | 307.2  | 369.5  | FLJ10156 | <a href="#">NM_019013.1</a> | FLJ10491                         |             |             |              |
| GI_9506614-S | 960    | 775.2  | 812.6  | FLJ10640 | <a href="#">NM_019023.1</a> | KIAA1933                         | S-          |             |              |
| GI_9506622-S | 322    | 333.7  | 422.5  | HIP14L   | <a href="#">NM_019028.1</a> | HIP3RP;ZDHHC13;FLJ10852;FLJ10941 |             |             |              |
| GI_9506640-S | 141.7  | 138.7  | 123.4  | FLJ11127 | <a href="#">NM_019018.1</a> |                                  |             |             |              |
| GI_9506642-S | 128.4  | 127.7  | 109.4  | FLJ11235 | <a href="#">NM_019033.1</a> |                                  | DNA         | nucleus     | regulation   |
| GI_9506646-S | 320.6  | 512.9  | 378.1  | FLJ20010 | <a href="#">NM_019021.1</a> |                                  |             |             |              |
| GI_9506650-S | 245.4  | 268.5  | 245    | KCTD5    | <a href="#">NM_018992.1</a> | FLJ20040                         | voltage-    | membran     | potassium    |
| GI_9506652-S | 118.7  | 142.5  | 117    | ARFRP2   | <a href="#">NM_019087.1</a> | FLJ20051                         |             |             |              |
| GI_9506654-S | 209.6  | 186.8  | 183.5  | FLJ20054 | <a href="#">NM_019049.1</a> |                                  |             |             |              |
| GI_9506662-S | 84.6   | 94.9   | 84.7   | FLJ20225 | <a href="#">NM_019062.1</a> |                                  | electron    |             | electron     |
| GI_9506668-S | 76.3   | 86.7   | 98.4   | KRT24    | <a href="#">NM_019016.1</a> | FLJ20261                         |             | kinesin     |              |
| GI_9506670-S | 119.6  | 157    | 165.7  | FLJ20273 | <a href="#">NM_019027.1</a> |                                  |             |             |              |

|              |        |        |        |          |                             |                                   |             |                         |
|--------------|--------|--------|--------|----------|-----------------------------|-----------------------------------|-------------|-------------------------|
| GI_9506672-S | 622    | 474    | 535.5  | FLJ20323 | <a href="#">NM_019005.1</a> |                                   |             |                         |
| GI_9506674-S | 313.9  | 256.8  | 317.5  | GFOD1    | <a href="#">NM_018988.1</a> | FLJ20330                          | oxidoredu   | electron                |
| GI_9506686-S | 2518.3 | 2498.1 | 971.2  | DDIT4    | <a href="#">NM_019058.1</a> | Dig2;REDD1;REDD-1;RTP801;FLJ20500 |             |                         |
| GI_9506688-S | 1958.8 | 2954.3 | 2595   | RRP41    | <a href="#">NM_019037.1</a> | p12A;FLJ20591                     | exonuclea   | nucleolus rRNA          |
| GI_9506696-S | 1209.8 | 1057.5 | 991.3  | NS3TP1   | <a href="#">NM_019048.1</a> | FLJ20752                          | protein     | protein                 |
| GI_9506716-S | 100    | 112.3  | 114.9  | GDAP1    | <a href="#">NM_018972.1</a> | CMT2G;CMT2H;CMT2K;CMT4A           |             | signal                  |
| GI_9506744-S | 168.9  | 224.7  | 207    | GPR14    | <a href="#">NM_018949.1</a> | UTR;UTR2                          | G-protein   | membran circulation     |
| GI_9506746-S | 248.2  | 287.8  | 277    | GPR27    | <a href="#">NM_018971.1</a> | SREB1                             | G-protein   | integral to signal      |
| GI_9506770-S | 89.2   | 93.4   | 89.6   | HCG4     | <a href="#">NM_018985.1</a> | HCGIV.9                           |             |                         |
| GI_9506784-S | 139.5  | 129.6  | 126    | HMX1     | <a href="#">NM_018942.1</a> | H6                                | transcripti |                         |
| GI_9506786-S | 114.1  | 119.3  | 97.2   | NLGN3    | <a href="#">NM_018977.1</a> | HNL3;KIAA1480                     |             |                         |
| GI_9506798-S | 120.7  | 124.6  | 126.3  | OR7A5    | <a href="#">NM_017506.1</a> | HTPCR2                            | G-protein   | physiologi              |
| GI_9506850-S | 97.4   | 87.8   | 86.8   | SPIN2    | <a href="#">NM_019003.1</a> |                                   | molecular   | cellular_co gametoge    |
| GI_9506858-S | 4031.7 | 3958   | 2700.3 | TOMM7    | <a href="#">NM_019059.1</a> | TOM7                              | protein     | mitochond intracellula  |
| GI_9506862-S | 258    | 235.4  | 221.3  | LOC55954 | <a href="#">NM_019103.1</a> |                                   | nucleic     | nucleus                 |
| GI_9506922-S | 104.6  | 110.6  | 101.1  | NICE-1   | <a href="#">NM_019060.1</a> |                                   |             |                         |
| GI_9506930-S | 3636.8 | 3317.5 | 2941   | DDX56    | <a href="#">NM_019082.1</a> | NOH61                             | ATP         | nucleolus ribosome      |
| GI_9507032-S | 3059.1 | 3985.9 | 3815.5 | TERF2IP  | <a href="#">NM_018975.1</a> | RAP1                              | telomeric   | nuclear telomere        |
| GI_9507162-S | 92.7   | 88.2   | 94.1   | SNTG1    | <a href="#">NM_018967.1</a> | SYN4;G1SYN                        | actin       | peripheral cell         |
| GI_9507164-S | 147.6  | 162.4  | 156    | SNTG2    | <a href="#">NM_018968.1</a> | SYN5;G2SYN                        | actin       | peripheral central      |
| GI_9507172-S | 117.2  | 120.6  | 115.8  | TAS2R5   | <a href="#">NM_018980.1</a> | T2R5                              | taste       | integral to taste [goid |
| GI_9507202-S | 280.1  | 335.3  | 244.6  | TREM2    | <a href="#">NM_018965.1</a> | Trem2a                            | receptor    | humoral                 |
| GI_9507214-S | 116.3  | 121.8  | 122.5  | TUBA8    | <a href="#">NM_018943.1</a> | TUBAL2                            | GTP         | cytoskelet microtubul   |
| GI_9507220-S | 222.6  | 247.9  | 217    | UBASH3A  | <a href="#">NM_018961.1</a> |                                   | catalytic   | nucleus metabolis       |
| GI_9507222-S | 439.6  | 509.9  | 432.5  | UBPH     | <a href="#">NM_019116.1</a> |                                   | DNA         | nucleus regulation      |
| GI_9507236-A | 125.7  | 141    | 128    | DDX4     | <a href="#">NM_019039.1</a> | VASA                              | nucleic     | developm                |
| GI_9558724-S | 1036.8 | 943.8  | 970.4  | CPSF1    | <a href="#">NM_013291.1</a> | CPSF160;HSU37012                  | mRNA 3'     | nucleus mRNA            |
| GI_9558730-S | 91.8   | 109.1  | 97.7   | HSU24186 | <a href="#">NM_013347.1</a> |                                   | single-     | DNA DNA                 |
| GI_9558738-S | 709.8  | 578.2  | 814.8  | HSU79266 | <a href="#">NM_013299.1</a> |                                   | DNA         | nucleus regulation      |
| GI_9558740-S | 2741.5 | 2369.5 | 1733.2 | HSU79274 | <a href="#">NM_013300.1</a> |                                   |             |                         |
| GI_9558742-S | 1355.3 | 1690.8 | 2220.4 | HSU79303 | <a href="#">NM_013301.1</a> |                                   |             |                         |
| GI_9558744-I | 113.4  | 132.4  | 101.4  | HSU84971 | <a href="#">NM_013303.1</a> | VG5Q;FLJ10283;HUS84971            |             |                         |
| GI_9558754-S | 800.7  | 805.6  | 744.4  | DNAJB9   | <a href="#">NM_012328.1</a> | MDG1;ERdj4;DKFZP564F1862          | chaperone   | nucleus protein         |
| GI_9558760-S | 351.6  | 438.2  | 207.5  | GAGEB1   | <a href="#">NM_003785.2</a> | PAGE1;GAGE-9;PAGE-1               | tumor       | cellular                |
| GI_9558763-I | 103.7  | 114.9  | 107.2  | STAU     | <a href="#">NM_017453.1</a> |                                   | double-     | microtubul              |
| GI_9558765-A | 3529.1 | 3998.1 | 4583.6 | STAU     | <a href="#">NM_017454.1</a> |                                   | double-     | microtubul              |
| GI_9624968-S | 107    | 116.9  | 121    | BTNL2    | <a href="#">NM_019602.1</a> | BTL-II;HSBLMHC1                   |             |                         |
| GI_9624970-S | 266.6  | 295.3  | 258.9  | C21orf62 | <a href="#">NM_019596.1</a> | B37                               | molecular   | cellular_co biological_ |
| GI_9624976-S | 130.3  | 141.6  | 110    | CRTAM    | <a href="#">NM_019604.1</a> |                                   |             |                         |
| GI_9624987-S | 126.1  | 135    | 123    | FLJ11267 | <a href="#">NM_019607.1</a> |                                   |             |                         |
| GI_9625042-S | 158.8  | 166.5  | 173.7  | TAS2R1   | <a href="#">NM_019599.1</a> | T2R1;TRB7                         | taste       | integral to chemosen    |
| GI_9625245-S | 106.5  | 265.8  | 316.3  | ANXA10   | <a href="#">NM_007193.2</a> | ANX14                             | calcium     |                         |
| GI_9665231-S | 137.6  | 166    | 119.2  | HLA-F    | <a href="#">NM_018950.1</a> | HLAF;HLA-5.4;HLA-CDA12            | class I     | integral to antigen     |
| GI_9665246-S | 174.1  | 199.3  | 148.8  | SERPINA3 | <a href="#">NM_001085.2</a> | ACT;AACT                          | serine      | acute-                  |

|              |         |        |        |             |                             |                                      |             |             |            |
|--------------|---------|--------|--------|-------------|-----------------------------|--------------------------------------|-------------|-------------|------------|
| GI_9665251-S | 100.2   | 106.6  | 88.6   | AMBN        | <a href="#">NM_016519.2</a> |                                      | structural  | extracellul | bone       |
| GI_9665252-A | 3041.4  | 6014   | 2618.9 | EFEMP1      | <a href="#">NM_018894.1</a> | DHRD;DRAD;FBNL;MLVT;S1-5;FBLN3       | calcium     | extracellul | vision     |
| GI_9665252-I | 98.1    | 90.8   | 87.2   | EFEMP1      | <a href="#">NM_018894.1</a> | DHRD;DRAD;FBNL;MLVT;S1-5;FBLN3       | calcium     | extracellul | vision     |
| GI_9665258-I | 109.9   | 122.3  | 99.4   | MFAP2       | <a href="#">NM_017459.1</a> | MAGP;MAGP1                           | extracellul | extracellul |            |
| GI_9665260-A | 134.2   | 138.5  | 114.5  | MFAP2       | <a href="#">NM_002403.2</a> | MAGP;MAGP1                           | extracellul | extracellul |            |
| GI_9665261-I | 490.5   | 1359.6 | 394.4  | EFEMP1      | <a href="#">NM_004105.2</a> | DHRD;DRAD;FBNL;MLVT;S1-5;FBLN3       | calcium     | extracellul | vision     |
| GI_9789896-S | 115.1   | 129.7  | 124.1  | LTB4R2      | <a href="#">NM_019839.1</a> | BLT2;BLTR2;JULF2                     | leukotrien  | integral to | negative   |
| GI_9789946-S | 85.4    | 94.2   | 86.5   | FGF20       | <a href="#">NM_019851.1</a> |                                      | fibroblast  | soluble     | signal     |
| GI_9790006-S | 101.9   | 89.2   | 105.6  | ANKRD7      | <a href="#">NM_019644.1</a> | TSA806                               |             |             | male       |
| GI_9790192-S | 128.1   | 166.9  | 127.9  | REPRIMO     | <a href="#">NM_019845.1</a> |                                      |             | cytoplasm   | cell cycle |
| GI_9790232-S | 339.7   | 267.3  | 223.7  | SLCO1B3     | <a href="#">NM_019844.1</a> | OATP8;OATP1B3;SLC21A8                | organic     | integral to | organic    |
| GI_9790234-S | 112.3   | 114    | 105.2  | SLC7A10     | <a href="#">NM_019849.1</a> | asc-1;HASC-1;FLJ20839                | L-serine    | membran     | amino      |
| GI_9790902-S | 5512.2  | 2247.1 | 2935.4 | PPP1R15A    | <a href="#">NM_014330.2</a> | GADD34                               |             |             | cell cycle |
| GI_9790904-S | 3782.3  | 2367.7 | 1059.2 | GADD45A     | <a href="#">NM_001924.2</a> | DDIT1;GADD45                         | structural  | ribosome    | cell cycle |
| GI_9790905-S | 93      | 84.3   | 84.5   | GADD45G     | <a href="#">NM_006705.2</a> | CR6;DDIT2;GRP17;GADD45gamma;GADD4    | structural  | ribosome    | activation |
| GI_9845266-S | 148.2   | 157.9  | 134.4  | ASAH2       | <a href="#">NM_019893.1</a> | HNAC1                                |             | mitochond   | ceramide   |
| GI_9845286-S | 106.4   | 120.1  | 97.4   | PAX1        | <a href="#">NM_006192.1</a> | HUP48                                | transcripti |             | skeletal   |
| GI_9845292-S | 208.7   | 259.6  | 219.9  | REC8L1      | <a href="#">NM_005132.1</a> | REC8;Rec8p                           |             | nucleus     | sister     |
| GI_9845486-A | 2534    | 1858.8 | 2106.8 | MARK2       | <a href="#">NM_017490.1</a> | EMK1                                 | protein     | microtubul  | protein    |
| GI_9845486-I | 162.7   | 183.7  | 161.2  | MARK2       | <a href="#">NM_017490.1</a> | EMK1                                 | protein     | microtubul  | protein    |
| GI_9845488-A | 2043.5  | 1546.7 | 1661.2 | MARK2       | <a href="#">NM_004954.2</a> | EMK1                                 | protein     | microtubul  | protein    |
| GI_9845492-I | 127     | 140.5  | 128.5  | GGT1        | <a href="#">NM_013430.1</a> | GGT;GTG;CD224;D22S672;D22S732        | gamma-      | membran     | amino      |
| GI_9845494-S | 799.9   | 866.3  | 257.1  | LAMA4       | <a href="#">NM_002290.2</a> | LAMA3                                | extracellul | basal       |            |
| GI_9845495-S | 501.7   | 537.8  | 418.6  | LAMB2       | <a href="#">NM_002292.2</a> | LAMS                                 | structural  | basal       | synaptic   |
| GI_9845497-S | 6526.9  | 7698.5 | 4964.6 | LAMC1       | <a href="#">NM_002293.2</a> | LAMB2                                | structural  | basement    | endoderm   |
| GI_9845499-A | 441.9   | 510    | 443.9  | LAMC2       | <a href="#">NM_018891.1</a> | EBR2;BM600;EBR2A;LAMB2T;LAMNB2;KAL   | heparin     | laminin-5   | epidermal  |
| GI_9845499-I | 129.5   | 149.1  | 140.8  | LAMC2       | <a href="#">NM_018891.1</a> | EBR2;BM600;EBR2A;LAMB2T;LAMNB2;KAL   | heparin     | laminin-5   | epidermal  |
| GI_9845501-S | 42004.8 | 39694  | 31564  | LAMR1       | <a href="#">NM_002295.2</a> | LRP;p40;67LR;RPSA;37LRP;LAMBR        | laminin     | laminin     | regulation |
| GI_9845506-S | 1707.4  | 2387.3 | 2191.3 | OAZ2        | <a href="#">NM_002537.1</a> |                                      | ornithine   |             | polyamine  |
| GI_9845514-I | 352.3   | 438.2  | 387.6  | S100A4      | <a href="#">NM_002961.2</a> | 42A;18A2;CAPL;MTS1;P9KA;PEL98        | calcium     |             | invasive   |
| GI_9845515-A | 291     | 269.3  | 221.1  | S100A4      | <a href="#">NM_019554.1</a> | 42A;18A2;CAPL;MTS1;P9KA;PEL98        | calcium     |             | invasive   |
| GI_9845517-S | 16154.8 | 14071  | 17943  | S100A6      | <a href="#">NM_014624.2</a> | 2A9;PRA;5B10;CABP;CACY               | calcium     | nuclear     | cell cycle |
| GI_9845518-S | 98.7    | 91.5   | 94.4   | S100A7      | <a href="#">NM_002963.2</a> | PSOR1                                | calcium     |             | epidermal  |
| GI_9845520-S | 113.8   | 123.6  | 108.2  | S100A9      | <a href="#">NM_002965.2</a> | MIF;NIF;P14;CAGB;CFAG;CGLB;L1AG;LIAG | calcium     | extracellul | cell-cell  |
| GI_9845521-S | 3601.1  | 4561.8 | 4485.5 | UROD        | <a href="#">NM_000374.2</a> | PCT                                  | uroporphy   |             | heme       |
| GI_9845523-S | 136.6   | 164.7  | 164.5  | EGR2        | <a href="#">NM_000399.2</a> | CMT1D;CMT4E;KROX20                   | DNA         | nucleus     | brain      |
| GI_9910116-S | 123.2   | 150.5  | 176.3  | ABCC8       | <a href="#">NM_000352.2</a> | HI;SUR;MRP8;PHHI;SUR1;ABC36;HRINS    | sulfonylur  | integral to | potassium  |
| GI_9910143-S | 94.1    | 95.9   | 90     | C1GALT1     | <a href="#">NM_020156.1</a> |                                      | transferas  |             |            |
| GI_9910155-S | 81.2    | 92.2   | 96.8   | ZA20D1      | <a href="#">NM_020205.1</a> | CEZANNE                              |             |             |            |
| GI_9910179-S | 341.8   | 271.2  | 232.6  | ACN9        | <a href="#">NM_020186.1</a> | DC11                                 |             |             |            |
| GI_9910181-S | 1749.2  | 2427.8 | 2508.5 | DC12        | <a href="#">NM_020187.1</a> |                                      |             |             |            |
| GI_9910195-S | 91.9    | 95.1   | 84.8   | DKFZp547H0  | <a href="#">NM_020161.1</a> |                                      | folic acid  | membran     | transport  |
| GI_9910199-S | 218.4   | 256.3  | 240.6  | DKFZp547I01 | <a href="#">NM_020217.1</a> |                                      |             |             |            |
| GI_9910203-S | 293.6   | 322    | 345    | DKFZp547O1  | <a href="#">NM_020224.1</a> |                                      |             |             |            |

|              |        |        |        |           |                             |                                |             |             |             |
|--------------|--------|--------|--------|-----------|-----------------------------|--------------------------------|-------------|-------------|-------------|
| GI_9910205-S | 1379.3 | 1980.9 | 1284.8 | C14orf132 | <a href="#">NM_020215.1</a> | DKFZp761F2014                  |             |             |             |
| GI_9910225-S | 369.1  | 448.3  | 438.9  | FN5       | <a href="#">NM_020179.1</a> |                                | molecular   | cellular_co | biological_ |
| GI_9910241-S | 456.1  | 477.6  | 365.4  | GK001     | <a href="#">NM_020198.1</a> |                                |             |             |             |
| GI_9910257-S | 573.3  | 723.8  | 682.1  | C14orf124 | <a href="#">NM_020195.1</a> | HCDI                           |             |             |             |
| GI_9910259-S | 1112.1 | 946.1  | 990.2  | XAB2      | <a href="#">NM_020196.1</a> | HCNP;HCRN                      | protein     | nucleus     | RNA         |
| GI_9910265-S | 199.4  | 233.4  | 275.5  | KNSL7     | <a href="#">NM_020242.1</a> | HKLP2                          | adenosine   | plus-end    | mitosis     |
| GI_9910269-S | 454.3  | 550.3  | 447.4  | HNOEL-iso | <a href="#">NM_020190.1</a> |                                |             |             |             |
| GI_9910273-S | 381.3  | 459.3  | 402.8  | SMYD2     | <a href="#">NM_020197.1</a> | HSKM-B;ZMYND14                 |             |             |             |
| GI_9910277-S | 2248.9 | 3015.7 | 3209.9 | HTGN29    | <a href="#">NM_020199.1</a> | KCT2                           |             |             |             |
| GI_9910279-S | 484.3  | 572.2  | 485.7  | UGCGL1    | <a href="#">NM_020120.1</a> | HUGT1                          | UDP-        | soluble     | protein     |
| GI_9910341-S | 165.5  | 207.2  | 166.9  | SLAMF8    | <a href="#">NM_020125.1</a> | BLAME;SBBI42                   |             |             |             |
| GI_9910345-S | 1521.1 | 1885.4 | 1541.3 | LOC56851  | <a href="#">NM_020154.1</a> | HT022;ORF1-FL1                 | purine      | cytoplasm   | biological_ |
| GI_9910361-S | 170.9  | 185.1  | 147.4  | LOC56920  | <a href="#">NM_020163.1</a> | FLJ00014                       |             |             | developm    |
| GI_9910373-I | 92.7   | 93.5   | 93.9   | LOC56965  | <a href="#">NM_020213.1</a> |                                |             |             |             |
| GI_9910375-S | 324    | 425.6  | 401.9  | INCENP    | <a href="#">NM_020238.1</a> |                                |             | kinesin     | cell cycle  |
| GI_9910377-S | 147.4  | 142.5  | 144.1  | SPEC2     | <a href="#">NM_020240.1</a> |                                | protein     | plasma      | signal      |
| GI_9910383-S | 1219.7 | 856.5  | 1065.5 | CHPT1     | <a href="#">NM_020244.1</a> | CPT1                           | diacylglyc  | membran     | lipid       |
| GI_9910389-S | 1324.6 | 909.8  | 860.8  | CTNNBIP1  | <a href="#">NM_020248.1</a> | ICAT                           | protein     | nucleus     | regulation  |
| GI_9910391-S | 174.3  | 209.7  | 184.2  | AGPAT4    | <a href="#">NM_020133.1</a> | dJ473J16.2;LPAAT-delta         | acyltransf  | integral to | metabolis   |
| GI_9910417-A | 112    | 126.4  | 133.4  | MDM1      | <a href="#">NM_020128.1</a> |                                |             |             |             |
| GI_9910417-I | 144.7  | 139.4  | 142.6  | MDM1      | <a href="#">NM_020128.1</a> |                                |             |             |             |
| GI_9910429-S | 84.8   | 93.4   | 85.2   | MEPE      | <a href="#">NM_020203.1</a> | OF45                           | extracellul | extracellul | skeletal    |
| GI_9910447-S | 134.4  | 154.3  | 168.9  | C8orf17   | <a href="#">NM_020237.1</a> | MOST-1                         |             |             |             |
| GI_9910449-S | 157.2  | 176.6  | 160.1  | MOST2     | <a href="#">NM_020250.1</a> |                                |             |             |             |
| GI_9910495-S | 112.8  | 119.9  | 107.1  | C14orf162 | <a href="#">NM_020181.1</a> | PLPL                           |             |             |             |
| GI_9910507-S | 112    | 106.9  | 94.4   | PRDM8     | <a href="#">NM_020226.1</a> | PFM5                           |             |             |             |
| GI_9910509-S | 113.7  | 126    | 117.9  | PRDM9     | <a href="#">NM_020227.1</a> | PFM6                           | DNA         | nucleus     | regulation  |
| GI_9910525-S | 112.7  | 128.5  | 115.7  | OPN1LW    | <a href="#">NM_020061.1</a> | CBP;RCP;CBBM                   | red-        | integral to | vision      |
| GI_9910553-S | 227.4  | 259.4  | 220.4  | SLC2A9    | <a href="#">NM_020041.1</a> | GLUTX;Glut9                    |             |             |             |
| GI_9910595-S | 854.8  | 687.5  | 422.1  | TUFT1     | <a href="#">NM_020127.1</a> |                                | structural  | kinesin     | bone        |
| GI_9938031-S | 210    | 270.5  | 203.7  | SLC2A6    | <a href="#">NM_017585.2</a> | GLUT6;GLUT9;HSA011372          |             |             |             |
| GI_9943840-S | 1902.4 | 2295.5 | 928.9  | TAF12     | <a href="#">NM_005644.2</a> | TAF2J;TAFII20                  | protein     | transcripti | transcripti |
| GI_9943841-S | 219.9  | 241.2  | 201.4  | PDCL      | <a href="#">NM_005388.2</a> | PhLP;DKFZp564M1863             | receptor    | cellular_co | regulation  |
| GI_9945309-S | 105.9  | 107.9  | 101.8  | PRH1      | <a href="#">NM_006250.1</a> | Pa                             |             | extracellul |             |
| GI_9945313-S | 8717.8 | 9330.6 | 5958.1 | EIF4A2    | <a href="#">NM_001967.2</a> | DDX2B;EIF4A;EIF4F;BM-010       | helicase    | eukaryotic  | regulation  |
| GI_9945317-S | 546.5  | 604.7  | 789    | MNT       | <a href="#">NM_020310.1</a> | ROX;MAD6;MXD6                  | transcripti | nucleus     | negative    |
| GI_9945319-S | 1108.6 | 1204.7 | 957    | CCNL1     | <a href="#">NM_020307.1</a> | BM-001;ania-6a                 |             |             |             |
| GI_9945321-S | 210.7  | 249.8  | 222.5  | SLC17A7   | <a href="#">NM_020309.1</a> | BNPI;VGLUT1                    | sodium-     | integral to | phosphate   |
| GI_9945331-S | 504.6  | 337    | 337.7  | GADD45B   | <a href="#">NM_015675.1</a> | MYD118;GADD45BETA;DKFZP566B133 |             |             | activation  |
| GI_9945333-S | 1830   | 1673.5 | 1712.5 | GALE      | <a href="#">NM_000403.2</a> |                                | UDP-        |             | nucleotide- |
| GI_9945384-S | 252.9  | 327.9  | 319.9  | GALNS     | <a href="#">NM_000512.2</a> | GAS;MPS4A;GALNAC6S             | N-          | lysosome    | metabolis   |
| GI_9945385-S | 3299   | 5774.1 | 5051.5 | GALNT2    | <a href="#">NM_004481.2</a> | GalNAc-T2                      | polypeptid  |             | O-linked    |
| GI_9945386-S | 126.9  | 148.5  | 140.8  | GALNT3    | <a href="#">NM_004482.2</a> | GalNAc-T3                      | polypeptid  | integral to | carbohydr   |
| GI_9945387-S | 591.4  | 778.5  | 501.1  | GP1BB     | <a href="#">NM_000407.3</a> | CD42c                          | thrombin    | integral to | blood       |



|              |        |        |        |          |                             |                                     |             |              |            |
|--------------|--------|--------|--------|----------|-----------------------------|-------------------------------------|-------------|--------------|------------|
| GI_9945438-S | 297.8  | 354.3  | 311.5  | PNUTL1   | <a href="#">NM_002688.2</a> | H5;SEPT5;CDCREL;CDCREL1;CDCREL-     | GTPase      |              | cytokinesi |
| GI_9951912-I | 98.6   | 133.1  | 107.9  | GRCA     | <a href="#">NM_019858.1</a> |                                     |             |              |            |
| GI_9951914-S | 4577.4 | 4727.1 | 7207.1 | AHCY     | <a href="#">NM_000687.1</a> | SAHH                                | adenosylh   | cytoplasm    | one-       |
| GI_9951918-S | 1334.7 | 764.8  | 688.5  | KATNA1   | <a href="#">NM_007044.2</a> |                                     | nucleotide  | cytoskelet   | mitosis    |
| GI_9951919-S | 91.8   | 92.9   | 88.6   | PAX5     | <a href="#">NM_016734.1</a> | BSAP                                | transcripti | nucleus      | humoral    |
| GI_9951921-S | 3630.9 | 4000   | 4995.8 | CIB1     | <a href="#">NM_006384.2</a> | CIB;KIP;SIP2-28;CALMYRIN            | protein     |              | double-    |
| GI_9951922-S | 239.3  | 330.3  | 271.2  | CA11     | <a href="#">NM_001217.2</a> | CARP2;CA-RP XI                      | carbonate   |              | one-       |
| GI_9951924-S | 1156.2 | 1823.4 | 574.2  | CA12     | <a href="#">NM_001218.2</a> | FLJ20151;HsT18816                   | carbonate   | integral to  | one-       |
| GI_9951925-S | 196    | 232.9  | 192    | CA4      | <a href="#">NM_000717.2</a> | CAIV                                | carbonate   | membran      | one-       |
| GI_9955947-S | 809.6  | 1048.1 | 577.8  | CA9      | <a href="#">NM_001216.1</a> | MN                                  | carbonate   | nucleus      | one-       |
| GI_9955953-A | 340.3  | 391.4  | 290.8  | ABCC1    | <a href="#">NM_019899.1</a> | MRP;ABCC;GS-X;MRP1;ABC29            | ATP         | membran      | drug       |
| GI_9955962-S | 216.8  | 235.1  | 223.9  | ABCB6    | <a href="#">NM_005689.1</a> | umat;ABC14;MTABC3;EST45597          | ATP-        |              | oncogene   |
| GI_9955964-S | 124.8  | 129.4  | 150.2  | ABCB8    | <a href="#">NM_007188.2</a> | MABC1;M-ABC1;EST328128              | ATP         | mitochond    | small      |
| GI_9955969-A | 470    | 714.2  | 400.3  | ABCC3    | <a href="#">NM_003786.2</a> | MLP2;MRP3;ABC31;CMOAT2;MOAT-        | organic     | membran      | small      |
| GI_9955973-I | 164.1  | 194.9  | 153.4  | ABCC3    | <a href="#">NM_020038.1</a> | MLP2;MRP3;ABC31;CMOAT2;MOAT-        | organic     | membran      | small      |
| GI_9961243-S | 403.5  | 500    | 500.3  | ABCB10   | <a href="#">NM_012089.1</a> | M-ABC2;MTABC2;EST20237              | nucleotide  | mitochond    | transport  |
| GI_9961245-I | 306.3  | 323.7  | 328.1  | TAP2     | <a href="#">NM_000544.2</a> | APT2;PSF2;ABC18;ABCB3;RING11;D6S217 | peptide     | membran      | peptide    |
| GI_9961247-A | 98     | 112.4  | 113.1  | TAP2     | <a href="#">NM_018833.1</a> | APT2;PSF2;ABC18;ABCB3;RING11;D6S217 | peptide     | membran      | peptide    |
| GI_9961247-I | 117.3  | 127.8  | 114.5  | TAP2     | <a href="#">NM_018833.1</a> | APT2;PSF2;ABC18;ABCB3;RING11;D6S217 | peptide     | membran      | peptide    |
| GI_9961251-A | 159.3  | 145.4  | 109.5  | ABCB4    | <a href="#">NM_018850.1</a> | MDR3;PGY3;ABC21;MDR2/3;PFIC-3       | ATP-        | membran      | drug       |
| GI_9961350-S | 142.6  | 156    | 144.2  | F10      | <a href="#">NM_000504.2</a> | FX;FXA                              | blood       | extracellul  | blood      |
| GI_9961351-I | 96.5   | 104.3  | 99.9   | F11      | <a href="#">NM_000128.2</a> | FXI                                 | molecular   | membran      | blood      |
| GI_9961352-A | 121.9  | 117.1  | 115.5  | F11      | <a href="#">NM_019559.1</a> | FXI                                 | molecular   | membran      | blood      |
| GI_9961354-S | 481.3  | 526.1  | 356.2  | F12      | <a href="#">NM_000505.2</a> | HAF                                 | serine-     | extracellul  | blood      |
| GI_9961355-S | 124    | 124.7  | 124.9  | F13A1    | <a href="#">NM_000129.2</a> | F13A                                | blood       | extracellul  | blood      |
| GI_9961356-S | 131.9  | 155.8  | 130.9  | F13B     | <a href="#">NM_001994.1</a> | FXIIIB                              | blood       |              | blood      |
| GI_9966760-S | 125.5  | 116.7  | 121.2  | CHM      | <a href="#">NM_000390.1</a> | TCD;GGTA;REP-1;DXS540               | RAB-        | Rab-         | C-terminal |
| GI_9966762-S | 345.2  | 405    | 340.9  | ARIH1    | <a href="#">NM_005744.2</a> | ARI;HARI;HHARI;UBCH7BP              | enzyme      | kinesin      | ubiquitin- |
| GI_9966771-S | 110.9  | 118.3  | 115.8  | ITGB6    | <a href="#">NM_000888.3</a> |                                     | cell        | integrin     | cell       |
| GI_9966778-S | 446.5  | 524    | 361.7  | EIF2B3   | <a href="#">NM_020365.1</a> | EIF-2B;EIF2Bgamma                   | translation | cytoplasm    | response   |
| GI_9966786-S | 126.8  | 155.1  | 139.7  | SLC24A2  | <a href="#">NM_020344.1</a> | NCKX2                               | symporter   | integral to  | sodium     |
| GI_9966788-S | 158.7  | 177.1  | 148.9  | CNNM1    | <a href="#">NM_020348.1</a> | ACDP1                               |             |              |            |
| GI_9966790-S | 142.1  | 166.3  | 163    | FSCN3    | <a href="#">NM_020369.1</a> |                                     | actin       | cytoskelet   | cell shape |
| GI_9966792-S | 937.8  | 1187.4 | 642.7  | LZTFL1   | <a href="#">NM_020347.1</a> |                                     |             |              |            |
| GI_9966794-S | 89.6   | 90.6   | 84.2   | PLSCR2   | <a href="#">NM_020359.1</a> |                                     | calcium     | integral to  | phospholi  |
| GI_9966798-S | 675.3  | 771.5  | 768.1  | SAS10    | <a href="#">NM_020368.1</a> |                                     |             |              |            |
| GI_9966810-S | 102.2  | 98     | 98     | SLC17A6  | <a href="#">NM_020346.1</a> | DNPI;VGLUT2                         | transporte  | integral to  | transport  |
| GI_9966818-S | 478.7  | 324.3  | 435.4  | PLSCR4   | <a href="#">NM_020353.1</a> |                                     | calcium     | integral to  | blood      |
| GI_9966820-S | 110.7  | 127.3  | 144.3  | ENTPD7   | <a href="#">NM_020354.1</a> | LALP1;FLJ30978                      | hydrolase   |              |            |
| GI_9966824-S | 98.3   | 94.9   | 81.3   | C20orf32 | <a href="#">NM_020356.1</a> | HEFL                                |             |              |            |
| GI_9966826-S | 2715   | 2668.2 | 2376.9 | PCNP     | <a href="#">NM_020357.1</a> |                                     |             | nucleus      |            |
| GI_9966838-S | 169.2  | 187    | 168.7  | GPR84    | <a href="#">NM_020370.1</a> | EX33;GPCR4                          | receptor    | integral to  | G-protein  |
| GI_9966840-S | 615.4  | 995.4  | 962.3  | AVEN     | <a href="#">NM_020371.1</a> | PDCD12                              | apoptosis   | intracellula | apoptosis  |
| GI_9966844-S | 135.4  | 137.8  | 126.9  | TMEM16B  | <a href="#">NM_020373.1</a> | C12orf3                             |             |              |            |

|              |        |       |        |          |                             |                                      |            |             |              |
|--------------|--------|-------|--------|----------|-----------------------------|--------------------------------------|------------|-------------|--------------|
| GI_9966848-S | 338.2  | 427.4 | 454.6  | C12orf5  | <a href="#">NM_020375.1</a> |                                      | catalytic  |             | metabolis    |
| GI_9966856-S | 794.5  | 603.1 | 504.2  | XPMC2H   | <a href="#">NM_020385.1</a> | XPMC2                                | exonuclea  | nucleus     | regulation   |
| GI_9966860-S | 86.7   | 100   | 93.2   | RAB25    | <a href="#">NM_020387.1</a> | CATX-8                               | GTP        |             | small        |
| GI_9966864-S | 100.1  | 91.8  | 97.4   | TRPC7    | <a href="#">NM_020389.1</a> | TRP7                                 | calcium    | integral to | cation       |
| GI_9966868-S | 102.8  | 107.7 | 100.3  | PGLYRP4  | <a href="#">NM_020393.1</a> | PGRPIB;SBBI67;PGRP-Ibeta;PGLYRPIbeta | protein    | membran     | metabolis    |
| GI_9966874-A | 144.6  | 225.1 | 245.6  | CAMK1D   | <a href="#">NM_020397.1</a> | CKLiK                                | ATP        |             | protein      |
| GI_9966874-I | 117.3  | 131.3 | 118.4  | CAMK1D   | <a href="#">NM_020397.1</a> | CKLiK                                | ATP        |             | protein      |
| GI_9966876-S | 198.1  | 211.7 | 225.1  | GOPC     | <a href="#">NM_020399.1</a> | CAL;FIG;PIST;GOPC1                   | protein    |             | intracellula |
| GI_9966880-S | 1411.1 | 1254  | 1180.2 | NUP107   | <a href="#">NM_020401.1</a> | NUP84                                | nucleocyto | nucleus     | transport    |
| GI_9966888-S | 114.5  | 132.8 | 127.4  | PRV1     | <a href="#">NM_020406.1</a> | NB1;CD177;HNA2A                      | receptor   |             |              |
| GI_9966890-S | 113.8  | 142.3 | 108.4  | RHBG     | <a href="#">NM_020407.1</a> |                                      | ammoniu    | membran     | transport    |
| GI_9966896-S | 1121.9 | 937.9 | 830.9  | ATP13A   | <a href="#">NM_020410.1</a> | CGI-152;FLJ31858;KIAA1825            |            |             |              |
| GI_9966898-I | 102.7  | 111.8 | 101.8  | GAGED2   | <a href="#">NM_020411.1</a> | XAGE1;XAGE-1                         |            |             |              |
| GI_9966902-S | 101.6  | 113.8 | 98.8   | MAN1C1   | <a href="#">NM_020379.1</a> | HMIC                                 | mannosyl-  | Golgi       | N-linked     |
| GI_9966904-S | 82.4   | 91.3  | 87.3   | LOC57151 | <a href="#">NM_020426.1</a> |                                      | lysozyme   | extracellul | cell wall    |
| GI_9966912-S | 146.4  | 154.1 | 160.5  | ARP3BETA | <a href="#">NM_020445.1</a> | ARP11                                | actin      | cytoskelet  | cell shape   |
| GI_9994164-S | 96     | 103.1 | 101.1  | ABO      | <a href="#">NM_020469.1</a> |                                      |            |             |              |
| GI_9994168-S | 701.9  | 870.4 | 905.1  | YIF1     | <a href="#">NM_020470.1</a> | 54TM;YIF1P                           |            |             |              |
| GI_9994186-S | 1049   | 700.4 | 729.8  | PDGFC    | <a href="#">NM_016205.1</a> | SCDGF                                |            |             |              |
| GI_9994198-S | 281.1  | 301.4 | 266.1  | BCAP29   | <a href="#">NM_018844.1</a> | BAP29                                | protein    | endoplas    | intracellula |
| GI_9998947-A | 111.6  | 135.9 | 117.1  | ACCN3    | <a href="#">NM_020322.1</a> | ASIC3;TNaC1;SLNAC1                   | sodium     | integral to | sensory      |
| lysA         | 113.8  | 122.6 | 112.9  |          |                             |                                      |            |             |              |
| pheA         | 90.3   | 97.5  | 95.6   |          |                             |                                      |            |             |              |
| thrB         | 89.8   | 96.8  | 91.8   |          |                             |                                      |            |             |              |
| trpF         | 102    | 113.8 | 102.4  |          |                             |                                      |            |             |              |
