# Supplementary material
Source: PubMed Central journal article supplement (PMC2659615)
Supplement: NIHMS94044-supplement-Table_3.pdf [file NIHMS94044-supplement-Table_3.pdf]

**Supplemental Table 3.** The genes the expression of which differs at least 2-fold in HT-MT cells vs HT-siRNA cells (p=0.01).

|    | Accession | Gene                                                                                                        | Ratio HT-MT/HT-siRNA |
|----|-----------|-------------------------------------------------------------------------------------------------------------|----------------------|
| 1  | NM_004995 | Matrix metalloproteinase 14 (membrane-inserted) (MMP14)                                                     | 37.0                 |
| 2  | NM_002593 | Procollagen C-endopeptidase enhancer (PCOLCE)                                                               | 18.0                 |
| 3  | NM_016249 | Melanoma antigen family C, 2 (MAGEC2)                                                                       | 15.6                 |
| 4  | NM_005824 | Leucine rich repeat containing 17 (LRRC17)                                                                  | 9.0                  |
| 5  | XM_290540 | Mucin 6, oligomeric mucus/gel-forming, (MUC6)                                                               | 7.8                  |
| 6  | NM_006598 | Solute carrier family 12 (potassium/chloride transporters), member 7 (SLC12A7)                              | 7.7                  |
| 7  | NM_012293 | Peroxidasin homolog (Drosophila) (PXDN)                                                                     | 7.5                  |
| 8  | NM_022475 | Hedgehog interacting protein (HHIP)                                                                         | 7.4                  |
| 9  | NM_005103 | Fasciculation and elongation protein zeta 1 (zygin 1) (FEZ1)                                                | 7.3                  |
| 10 | NM_177535 | Melanoma antigen family D, 4 (MAGED4)                                                                       | 7.3                  |
| 11 | NM_005328 | Hyaluronan synthase 2 (HAS2)                                                                                | 7.1                  |
| 12 | NM_012098 | Angiopoietin-like 2 (ANGPTL2)                                                                               | 7.1                  |
| 13 | NM_001845 | Collagen, type IV, alpha 1 (COL4A1)                                                                         | 7.0                  |
| 14 | NM_000362 | TIMP metalloproteinase inhibitor 3 (TIMP3)                                                                  | 6.5                  |
| 15 | NM_004004 | Gap junction protein, beta 2, 26kDa (GJB2)                                                                  | 6.3                  |
| 16 | NM_144967 | Hypothetical protein FLJ30058 (FLJ30058)                                                                    | 6.1                  |
| 17 | NM_002121 | Major histocompatibility complex, class II, DP beta 1 (HLA-DPB1)                                            | 5.5                  |
| 18 | NM_006622 | Polo-like kinase 2 (Drosophila) (PLK2)                                                                      | 5.5                  |
| 19 | NM_052947 | Heart alpha-kinase (HAK)                                                                                    | 5.4                  |
| 20 | NM_018659 | Cytokine-like 1 (CYTL1)                                                                                     | 5.0                  |
| 21 | NM_015345 | Dishevelled associated activator of morphogenesis 2 (DAAM2)                                                 | 5.0                  |
| 22 | NM_000873 | Intercellular adhesion molecule 2 (ICAM2)                                                                   | 4.9                  |
| 23 | NM_015544 | Transmembrane protein 98 (TMEM98)                                                                           | 4.9                  |
| 24 | NM_004033 | Annexin A6 (ANXA6)                                                                                          | 4.8                  |
| 25 | NM_015541 | Leucine-rich repeats and immunoglobulin-like domains 1 (LRIG1)                                              | 4.8                  |
| 26 | NM_004867 | Integral membrane protein 2A (ITM2A)                                                                        | 4.8                  |
| 27 | NM_013322 | Sorting nexin 10 (SNX10)                                                                                    | 4.7                  |
| 28 | NM_022842 | CUB domain containing protein 1 (CDCP1)                                                                     | 4.6                  |
| 29 | NM_002448 | Msh homeobox 1 (MSX1)                                                                                       | 4.3                  |
| 30 | NM_170706 | Nicotinamide nucleotide adenylyltransferase 2 (NMNAT2)                                                      | 4.3                  |
| 31 | NM_000878 | Interleukin 2 receptor, beta (IL2RB)                                                                        | 4.3                  |
| 32 | NM_012385 | Nuclear protein 1 (NUPR1)                                                                                   | 4.2                  |
| 33 | NM_182486 | C1q and tumor necrosis factor related protein 6 (C1QTNF6)                                                   | 4.1                  |
| 34 | NM_080792 | Signal-regulatory protein alpha (SIRPA)                                                                     | 4.1                  |
| 35 | NM_000093 | Collagen, type V, alpha 1 (COL5A1)                                                                          | 3.9                  |
| 36 | NM_013409 | Follistatin (FST)                                                                                           | 3.9                  |
| 37 | NM_003641 | Interferon induced transmembrane protein 1 (9-27) (IFITM1)                                                  | 3.9                  |
| 38 | NM_001156 | Annexin A7 (ANXA7)                                                                                          | 3.8                  |
| 39 | NM_173217 | ST6 beta-galactosamide alpha-2,6-sialyltransferase 1 (ST6GAL1)                                              | 3.8                  |
| 40 | NM_014391 | Ankyrin repeat domain 1 (cardiac muscle) (ANKRD1)                                                           | 3.8                  |
| 41 | NM_139035 | SWI/SNF related, matrix associated, actin dependent regulator of chromatin, subfamily a, member 1 (SMARCA1) | 3.7                  |
| 42 | NM_002201 | Interferon stimulated exonuclease gene 20kDa (ISG20)                                                        | 3.7                  |
| 43 | NM_006533 | Melanoma inhibitory activity (MIA)                                                                          | 3.7                  |
| 44 | NM_005330 | Hemoglobin, epsilon 1 (HBE1)                                                                                | 3.7                  |
| 45 | NM_005978 | S100 calcium binding protein A2 (S100A2)                                                                    | 3.6                  |
| 46 | XM_376018 | KIAA1644 protein (KIAA1644)                                                                                 | 3.6                  |
| 47 | NM_182943 | Procollagen-lysine, 2-oxoglutarate 5-dioxygenase 2 (PLOD2),                                                 | 3.5                  |
| 48 | NM_033140 | Caldesmon 1 (CALD1)                                                                                         | 3.5                  |
| 49 | NM_004105 | EGF-containing fibulin-like extracellular matrix protein 1 (EFEMP1)                                         | 3.4                  |
| 50 | NM_002391 | Midkine (neurite growth-promoting factor 2) (MDK)                                                           | 3.4                  |
| 51 | NM_032048 | Elastin microfibril interfacier 2 (EMILIN2)                                                                 | 3.4                  |

|     |           |                                                                                                                                                     |     |
|-----|-----------|-----------------------------------------------------------------------------------------------------------------------------------------------------|-----|
| 52  | NM_138609 | H2A histone family, member Y (H2AFY)                                                                                                                | 3.4 |
| 53  | NM_002290 | Laminin, alpha 4 (LAMA4)                                                                                                                            | 3.4 |
| 54  | NM_021181 | SLAM family member 7 (SLAMF7)                                                                                                                       | 3.3 |
| 55  | NM_017982 | Sushi domain containing 4 (SUSD4)                                                                                                                   | 3.3 |
| 56  | NM_002571 | Progesterone-associated endometrial protein (placental protein 14, pregnancy-associated endometrial alpha-2-globulin, alpha uterine protein) (PAEP) | 3.3 |
| 57  | NM_032603 | Lysyl oxidase-like 3 (LOXL3)                                                                                                                        | 3.3 |
| 58  | NM_005606 | legumain (LGMN)                                                                                                                                     | 3.2 |
| 59  | NM_181719 | Transmembrane and coiled-coil domains 4 (TMCO4)                                                                                                     | 3.2 |
| 60  | NM_000366 | Tropomyosin 1 (alpha) (TPM1)                                                                                                                        | 3.2 |
| 61  | NM_001218 | Carbonic anhydrase XII (CA12)                                                                                                                       | 3.2 |
| 62  | NM_005514 | Major histocompatibility complex, class I, B (HLA-B)                                                                                                | 3.2 |
| 63  | NM_003781 | Beta-1,3-N-acetylgalactosaminyltransferase 1 (globoside blood group) (B3GALNT1)                                                                     | 3.1 |
| 64  | NM_024902 | Hypothetical protein FLJ13236 (FLJ13236)                                                                                                            | 3.1 |
| 65  | NM_033254 | Boc homolog (mouse) (BOC)                                                                                                                           | 3.1 |
| 66  | NM_032608 | Myosin XVIIIIB (MYO18B)                                                                                                                             | 3.1 |
| 67  | NM_003186 | Transgelin (TAGLN)                                                                                                                                  | 3.1 |
| 68  | NM_152899 | Interleukin 4 induced 1 (IL4I1)                                                                                                                     | 3.1 |
| 69  | NM_001759 | Cyclin D2 (CCND2)                                                                                                                                   | 3.1 |
| 70  | NM_006472 | Thioredoxin interacting protein (TXNIP)                                                                                                             | 3.1 |
| 71  | NM_020335 | Vang-like 2 (van gogh, Drosophila) (VANGL2)                                                                                                         | 3.1 |
| 72  | NM_002284 | Keratin 86 (KRT86)                                                                                                                                  | 3.1 |
| 73  | NM_022463 | Nucleoredoxin (NXN)                                                                                                                                 | 3.1 |
| 74  | NM_130445 | Collagen, type XVIII, alpha 1 (COL18A1)                                                                                                             | 3.1 |
| 75  | NM_054034 | Fibronectin 1 (FN1)                                                                                                                                 | 3.0 |
| 76  | NM_005613 | Regulator of G-protein signalling 4 (RGS4)                                                                                                          | 3.0 |
| 77  | NM_006207 | Platelet-derived growth factor receptor-like (PDGFRL)                                                                                               | 3.0 |
| 78  | NM_173553 | Hypothetical protein FLJ25801 (FLJ25801)                                                                                                            | 3.0 |
| 79  | NM_018281 | Enoyl Coenzyme A hydratase domain containing 2 (ECHDC2)                                                                                             | 3.0 |
| 80  | NM_138720 | Histone cluster 1, H2bd (HIST1H2BD)                                                                                                                 | 2.9 |
| 81  | NM_001897 | Chondroitin sulfate proteoglycan 4 (CSPG4)                                                                                                          | 2.9 |
| 82  | NM_004811 | Leupaxin (LPXN)                                                                                                                                     | 2.8 |
| 83  | NM_002462 | Myxovirus (influenza virus) resistance 1, interferon-inducible protein p78 (mouse) (MX1)                                                            | 2.8 |
| 84  | NM_054014 | FK506 binding protein 1A, 12kDa (FKBP1A)                                                                                                            | 2.8 |
| 85  | NM_001974 | Egf-like module containing, mucin-like, hormone receptor-like 1 (EMR1)                                                                              | 2.8 |
| 86  | NM_024997 | Activating transcription factor 7 interacting protein 2 (ATF7IP2)                                                                                   | 2.7 |
| 87  | NM_018354 | Chromosome 20 open reading frame 46 (C20orf46)                                                                                                      | 2.7 |
| 88  | NM_002291 | Laminin, beta 1 (LAMB1)                                                                                                                             | 2.7 |
| 89  | NM_032709 | Chromosome 10 open reading frame 33 (C10orf33)                                                                                                      | 2.7 |
| 90  | NM_001530 | Hypoxia-inducible factor 1, alpha subunit (basic helix-loop-helix transcription factor) (HIF1A)                                                     | 2.7 |
| 91  | NM_018837 | sulfatase 2 (SULF2)                                                                                                                                 | 2.7 |
| 92  | NM_003725 | Hydroxysteroid (17-beta) dehydrogenase 6 homolog (mouse) (HSD17B6)                                                                                  | 2.7 |
| 93  | NM_032446 | Multiple EGF-like-domains 10 (MEGF10)                                                                                                               | 2.6 |
| 94  | NM_001269 | Regulator of chromosome condensation 1 (RCC1)                                                                                                       | 2.6 |
| 95  | NM_000624 | Serpin peptidase inhibitor, clade A (alpha-1 antiproteinase, antitrypsin), member 5 (SERPINA5)                                                      | 2.6 |
| 96  | NM_003264 | Toll-like receptor 2 (TLR2)                                                                                                                         | 2.6 |
| 97  | NM_004938 | Death-associated protein kinase 1 (DAPK1)                                                                                                           | 2.6 |
| 98  | NM_005567 | Lectin, galactoside-binding, soluble, 3 binding protein (LGALS3BP)                                                                                  | 2.6 |
| 99  | NM_016564 | Cycle exit and neuronal differentiation 1 (CEND1)                                                                                                   | 2.6 |
| 100 | NM_182703 | Ankyrin repeat and death domain containing 1A (ANKDD1A)                                                                                             | 2.6 |
| 101 | NM_012212 | Leukotriene B4 12-hydroxydehydrogenase (LTB4DH)                                                                                                     | 2.6 |
| 102 | XM_291277 | Homolog of rat pragma of Rnd2 (DKFZp761P0423)                                                                                                       | 2.6 |
| 103 | NM_080591 | Prostaglandin-endoperoxide synthase 1 (prostaglandin G/H synthase and cyclooxygenase) (PTGS1)                                                       | 2.6 |
| 104 | NM_174858 | Adenylate kinase 5 (AK5)                                                                                                                            | 2.6 |
| 105 | NM_019058 | DNA-damage-inducible transcript 4 (DDIT4)                                                                                                           | 2.6 |

|     |           |                                                                                                                |     |
|-----|-----------|----------------------------------------------------------------------------------------------------------------|-----|
| 106 | NM_145252 | Similar to common salivary protein 1 (LOC124220)                                                               | 2.6 |
| 107 | NM_147204 | Transient receptor potential cation channel, subfamily V, member 4 (TRPV4)                                     | 2.5 |
| 108 | NM_052880 | HGFL gene (MGC17330)                                                                                           | 2.5 |
| 109 | NM_181342 | FK506 binding protein 7 (FKBP7)                                                                                | 2.5 |
| 110 | NM_152330 | FERM domain containing 6 (FRMD6)                                                                               | 2.5 |
| 111 | NM_000597 | Insulin-like growth factor binding protein 2, 36kDa (IGFBP2)                                                   | 2.5 |
| 112 | NM_194272 | RNA binding protein with multiple splicing 2 (RBPMS2)                                                          | 2.5 |
| 113 | NM_001649 | Shroom family member 2 (SHROOM2)                                                                               | 2.5 |
| 114 | NM_006851 | GLI pathogenesis-related 1 (glioma) (GLIPR1)                                                                   | 2.5 |
| 115 | NM_018993 | Ras and Rab interactor 2 (RIN2)                                                                                | 2.5 |
| 116 | NM_014449 | G protein-coupled receptor 162 (GPR162)                                                                        | 2.5 |
| 117 | NM_015013 | Amine oxidase (flavin containing) domain 2 (AOF2)                                                              | 2.5 |
| 118 | NM_005644 | TAF12 RNA polymerase II, TATA box binding protein (TBP)-associated factor, 20kDa (TAF12)                       | 2.5 |
| 119 | NM_016938 | EGF-containing fibulin-like extracellular matrix protein 2 (EFEMP2)                                            | 2.4 |
| 120 | NM_130811 | Synaptosomal-associated protein, 25kDa (SNAP25)                                                                | 2.4 |
| 121 | NM_170784 | McKusick-Kaufman syndrome (MKKS)                                                                               | 2.4 |
| 122 | NM_033120 | Naked cuticle homolog 2 (Drosophila) (NKD2)                                                                    | 2.4 |
| 123 | NM_005335 | Hematopoietic cell-specific Lyn substrate 1 (HCLS1)                                                            | 2.4 |
| 124 | NM_145263 | Spermatogenesis associated 18 homolog (rat) (SPATA18)                                                          | 2.4 |
| 125 | NM_022572 | Paroxysmal nonkinesigenic dyskinesia (PNKD)                                                                    | 2.4 |
| 126 | NM_006120 | Major histocompatibility complex, class II, DM alpha (HLA-DMA)                                                 | 2.4 |
| 127 | NM_153649 | Tropomyosin 3 (TPM3)                                                                                           | 2.4 |
| 128 | NM_019903 | Adducin 3 (gamma) (ADD3)                                                                                       | 2.4 |
| 129 | NM_004877 | Glia maturation factor, gamma (GMFG)                                                                           | 2.4 |
| 130 | XM_087386 | HEG homolog 1 (zebrafish) (HEG1)                                                                               | 2.4 |
| 131 | NM_000433 | Neutrophil cytosolic factor 2 (65kDa, chronic granulomatous disease, autosomal 2) (NCF2)                       | 2.4 |
| 132 | NM_144776 | Formyltetrahydrofolate dehydrogenase (FTHFD)                                                                   | 2.4 |
| 133 | NM_002118 | Major histocompatibility complex, class II, DM beta (HLA-DMB)                                                  | 2.4 |
| 134 | NM_020992 | PDZ and LIM domain 1 (elfin) (PDLIM1)                                                                          | 2.4 |
| 135 | NM_002335 | Low density lipoprotein receptor-related protein 5 (LRP5)                                                      | 2.4 |
| 136 | NM_000877 | Interleukin 1 receptor, type I (IL1R1)                                                                         | 2.4 |
| 137 | NM_007203 | PALM2-AKAP2 protein (PALM2-AKAP2)                                                                              | 2.4 |
| 138 | NM_003102 | Superoxide dismutase 3, extracellular (SOD3)                                                                   | 2.4 |
| 139 | NM_007069 | HRAS-like suppressor 3 (HRASLS3)                                                                               | 2.3 |
| 140 | NM_018665 | DEAD (Asp-Glu-Ala-Asp) box polypeptide 43 (DDX43)                                                              | 2.3 |
| 141 | NM_001235 | Serpin peptidase inhibitor, clade H (heat shock protein 47), member 1, (collagen binding protein 1) (SERPINH1) | 2.3 |
| 142 | NM_022356 | Leucine proline-enriched proteoglycan (leprecan) 1 (LEPRE1)                                                    | 2.3 |
| 143 | NM_177964 | Hypothetical protein LOC130576 (LOC130576)                                                                     | 2.3 |
| 144 | NM_001901 | Connective tissue growth factor (CTGF)                                                                         | 2.3 |
| 145 | NM_152286 | Patatin-like phospholipase domain containing 7 (PNPLA7)                                                        | 2.3 |
| 146 | NM_015103 | Plexin D1 (PLXND1)                                                                                             | 2.3 |
| 147 | NM_002862 | phosphorylase, glycogen; brain (PYGB)                                                                          | 2.3 |
| 148 | NM_031897 | Calcium channel, voltage-dependent, gamma subunit 6 (CACNG6)                                                   | 2.3 |
| 149 | NM_138399 | Transmembrane protein 44 (TMEM44)                                                                              | 2.3 |
| 150 | NM_030583 | Matrilin 2 (MATN2)                                                                                             | 2.3 |
| 151 | NM_018948 | ERBB receptor feedback inhibitor 1 (ERRFI1)                                                                    | 2.3 |
| 152 | NM_014309 | RNA binding motif protein 9 (RBM9)                                                                             | 2.3 |
| 153 | NM_014050 | Mitochondrial ribosomal protein L42 (MRPL42)                                                                   | 2.3 |
| 154 | NM_001381 | Docking protein 1, 62kDa (downstream of tyrosine kinase 1) (DOK1)                                              | 2.3 |
| 155 | NM_138973 | Beta-site APP-cleaving enzyme 1 (BACE1)                                                                        | 2.3 |
| 156 | NM_005026 | Phosphoinositide-3-kinase, catalytic, delta (PI3Kδ)                                                            | 2.3 |
| 157 | NM_018113 | Limb region 1 homolog (mouse)-like (LMBR1L)                                                                    | 2.3 |
| 158 | NM_014678 | SAPS domain family, member 2 (SAPS2)                                                                           | 2.3 |
| 160 | NM_017947 | Molybdenum cofactor sulfurase (MOCOS)                                                                          | 2.3 |
| 161 | NM_004585 | Retinoic acid receptor responder (tazarotene induced) 3 (RARRES3)                                              | 2.2 |

|     |           |                                                                                                          |     |
|-----|-----------|----------------------------------------------------------------------------------------------------------|-----|
| 162 | NM_183416 | Kinesin family member 1B (KIF1B)                                                                         | 2.2 |
| 163 | NM_005037 | Peroxisome proliferator-activated receptor gamma (PPARG)                                                 | 2.2 |
| 164 | NM_031227 | Chromosome 20 open reading frame 18 (C20orf18)                                                           | 2.2 |
| 165 | NM_002546 | Tumor necrosis factor receptor superfamily, member 11b (osteoprotegerin) (TNFRSF11B)                     | 2.2 |
| 166 | NM_014298 | Quinolate phosphoribosyltransferase (nicotinate-nucleotide pyrophosphorylase (carboxylating)) (QPRT)     | 2.2 |
| 167 | NM_181847 | Adhesion molecule with Ig-like domain 2 (AMIGO2)                                                         | 2.2 |
| 168 | NM_173343 | Interleukin 1 receptor, type II (IL1R2)                                                                  | 2.2 |
| 169 | NM_006208 | Ectonucleotide pyrophosphatase/phosphodiesterase 1 (ENPP1)                                               | 2.2 |
| 170 | NM_014584 | ERO1-like ( <i>S. cerevisiae</i> ) (ERO1L)                                                               | 2.2 |
| 171 | NM_145640 | Apolipoprotein L, 3 (APOL3)                                                                              | 2.2 |
| 172 | NM_183376 | Arrestin domain containing 4 (ARRDC4)                                                                    | 2.2 |
| 173 | NM_004591 | Chemokine (C-C motif) ligand 20 (CCL20)                                                                  | 2.2 |
| 174 | NM_030811 | Mitochondrial ribosomal protein S26 (MRPS26)                                                             | 2.2 |
| 175 | NM_005197 | Checkpoint suppressor 1 (CHES1)                                                                          | 2.2 |
| 176 | NM_024897 | Progesterin and adipoQ receptor family member VI (PAQR6)                                                 | 2.2 |
| 177 | NM_014467 | Sushi-repeat-containing protein, X-linked 2 (SRPX2)                                                      | 2.2 |
| 178 | NM_005452 | WD repeat domain 46 (WDR46)                                                                              | 2.2 |
| 179 | NM_145802 | Septin 6 (SEPT6)                                                                                         | 2.2 |
| 180 | NM_016940 | Chromosome 21 open reading frame 6 (C21orf6)                                                             | 2.2 |
| 181 | NM_053044 | HtrA serine peptidase 3 (HTRA3)                                                                          | 2.2 |
| 182 | NM_022910 | NDRG family member 4 (NDRG4)                                                                             | 2.2 |
| 183 | NM_018004 | Transmembrane protein 45A (TMEM45A)                                                                      | 2.2 |
| 184 | NM_014918 | Carbohydrate (chondroitin) synthase 1 (CHSY1)                                                            | 2.2 |
| 185 | NM_005630 | Solute carrier organic anion transporter family, member 2A1 (SLCO2A1)                                    | 2.2 |
| 186 | NM_001849 | Collagen, type VI, alpha 2 (COL6A2)                                                                      | 2.2 |
| 187 | NM_015532 | Glutamate receptor, ionotropic, N-methyl D-aspartate-like 1A (GRINL1A)                                   | 2.2 |
| 188 | NM_198285 | WD repeat domain 86 (WDR86)                                                                              | 2.2 |
| 189 | NM_020531 | Chromosome 20 open reading frame 3 (C20orf3)                                                             | 2.2 |
| 190 | NM_006870 | Destrin (actin depolymerizing factor) (DSTN)                                                             | 2.2 |
| 191 | NM_012109 | Chromosome 19 open reading frame 4 (C19orf4)                                                             | 2.1 |
| 192 | NM_005525 | Hydroxysteroid (11-beta) dehydrogenase 1 (HSD11B1)                                                       | 2.1 |
| 193 | NM_145183 | PYD and CARD domain containing (PYCARD)                                                                  | 2.1 |
| 194 | NM_019095 | Cardiolipin synthase 1 (CRLS1)                                                                           | 2.1 |
| 195 | NM_016463 | CXXC finger 5 (CXXC5)                                                                                    | 2.1 |
| 196 | NM_006281 | Serine/threonine kinase 3 (STE20 homolog, yeast) (STK3)                                                  | 2.1 |
| 197 | NM_032823 | Chromosome 9 open reading frame 3 (C9orf3)                                                               | 2.1 |
| 198 | NM_000176 | Nuclear receptor subfamily 3, group C, member 1 (glucocorticoid receptor) (NR3C1)                        | 2.1 |
| 199 | NM_021063 | Histone 1, H2bd (HIST1H2BD)                                                                              | 2.1 |
| 200 | NM_033118 | Myosin light chain kinase 2, skeletal muscle (MYLK2)                                                     | 2.1 |
| 201 | NM_182977 | Nicotinamide nucleotide transhydrogenase (NNT)                                                           | 2.1 |
| 202 | XM_351093 | Similar to Death effector filament-forming Ced-4-like apoptosis protein (LOC374765)                      | 2.1 |
| 203 | NM_016619 | Placenta-specific 8 (PLAC8)                                                                              | 2.1 |
| 204 | NM_000022 | Adenosine deaminase (ADA)                                                                                | 2.1 |
| 205 | NM_018013 | Hypothetical protein FLJ10159 (FLJ10159)                                                                 | 2.1 |
| 206 | NM_004905 | Peroxiredoxin 6 (PRDX6)                                                                                  | 2.1 |
| 207 | NM_006435 | Interferon induced transmembrane protein 2 (1-8D) (IFITM2)                                               | 2.1 |
| 208 | NM_003785 | P antigen family, member 1 (prostate associated) (PAGE1)                                                 | 2.1 |
| 209 | NM_004221 | Interleukin 32 (IL32)                                                                                    | 2.1 |
| 210 | NM_014685 | Homocysteine-inducible, endoplasmic reticulum stress-inducible, ubiquitin-like domain member 1 (HERPUD1) | 2.1 |
| 211 | NM_181351 | Neural cell adhesion molecule 1 (NCAM1)                                                                  | 2.1 |
| 212 | NM_001038 | Sodium channel, nonvoltage-gated 1 alpha (SCNN1A)                                                        | 2.1 |
| 213 | NM_003595 | Tyrosylprotein sulfotransferase 2 (TPST2)                                                                | 2.1 |
| 214 | NM_017845 | COMM domain containing 8 (COMMD8)                                                                        | 2.1 |
| 215 | NM_053282 | SH2 domain containing 1B (SH2D1B)                                                                        | 2.1 |
| 216 | NM_005651 | Tryptophan 2,3-dioxygenase (TDO2)                                                                        | 2.1 |
| 217 | NM_015892 | B cell RAG associated protein (GALNAC4S-6ST)                                                             | 2.1 |

|     |           |                                                                                 |     |
|-----|-----------|---------------------------------------------------------------------------------|-----|
| 218 | NM_005693 | Nuclear receptor subfamily 1, group H, member 3 (NR1H3)                         | 2.1 |
| 219 | NM_018003 | Uveal autoantigen with coiled-coil domains and ankyrin repeats (UACA)           | 2.1 |
| 220 | NM_000147 | Fucosidase, alpha-L- 1, tissue (FUCA1)                                          | 2.1 |
| 221 | NM_005165 | Aldolase C, fructose-bisphosphate (ALDOC)                                       | 2.1 |
| 222 | NM_175567 | Purinergic receptor P2X, ligand-gated ion channel, 4 (P2RX4)                    | 2.1 |
| 223 | NM_052818 | Hypothetical gene CG018 (CG018)                                                 | 2.1 |
| 224 | NM_175841 | Spermine oxidase (SMOX)                                                         | 2.1 |
| 225 | NM_003650 | Cystatin F (leukocystatin) (CST7)                                               | 2.1 |
| 226 | NM_003677 | Density-regulated protein (DENR)                                                | 2.1 |
| 227 | NM_022126 | Phospholysine phosphohistidine inorganic pyrophosphate phosphatase (LHPP)       | 2.1 |
| 228 | NM_004233 | CD83 molecule (CD83)                                                            | 2.1 |
| 229 | NM_004696 | Solute carrier family 16 (monocarboxylic acid transporters), member 4 (SLC16A4) | 2.0 |
| 230 | NM_153208 | IQ motif containing K (IQCK)                                                    | 2.0 |
| 231 | NM_001553 | Insulin-like growth factor binding protein 7 (IGFBP7)                           | 2.0 |
| 232 | NM_022783 | DEP domain containing 6 (DEPDC6)                                                | 2.0 |
| 233 | NM_006169 | Nicotinamide N-methyltransferase (NNMT)                                         | 2.0 |
| 234 | NM_152227 | Sorting nexin 5 (SNX5)                                                          | 2.0 |
| 235 | NM_016816 | 2',5'-oligoadenylate synthetase 1, 40/46kDa (OAS1)                              | 2.0 |
| 236 | NM_018284 | Guanylate binding protein 3 (GBP3)                                              | 2.0 |
| 237 | NM_033111 | CG016 (LOC88523)                                                                | 2.0 |
| 238 | NM_002017 | Friend leukemia virus integration 1 (FLI1)                                      | 2.0 |
| 239 | NM_130386 | Collectin sub-family member 12 (COLEC12)                                        | 2.0 |
| 240 | NM_152504 | Chromosome 20 open reading frame 196 (C20orf196)                                | 2.0 |
| 241 | NM_004289 | Nuclear factor (erythroid-derived 2)-like 3 (NFE2L3)                            | 2.0 |
| 242 | NM_017817 | RAB20, member RAS oncogene family (RAB20)                                       | 2.0 |
| 243 | NM_181528 | N-acetyltransferase 5 (NAT5)                                                    | 2.0 |
| 244 | NM_032738 | Fc receptor-like A (FCRLA)                                                      | 2.0 |
| 245 | NM_177560 | Casein kinase 2, alpha (CK2 $\alpha$ )                                          | 2.0 |
| 246 | NM_203422 | Similar to hypothetical protein (LOC221091)                                     | 2.0 |
| 247 | NM_001848 | Collagen, type VI, alpha 1 (COL6A1)                                             | 2.0 |
| 248 | NM_001975 | Enolase 2 (gamma, neuronal) (ENO2)                                              | 2.0 |
| 249 | NM_053031 | Myosin, light chain kinase (MYLK)                                               | 2.0 |
| 250 | NM_001873 | Carboxypeptidase E (CPE)                                                        | 2.0 |
| 251 | NM_012455 | Pleckstrin and Sec7 domain containing 4 (PSD4)                                  | 2.0 |
| 252 | NM_007271 | Serine/threonine kinase 38 (STK38)                                              | 2.0 |
| 253 | NM_145810 | Cell division cycle associated 7 (CDCA7)                                        | 2.0 |
| 254 | NM_000214 | Jagged 1 (Alagille syndrome) (JAG1)                                             | 2.0 |
| 255 | NM_032866 | Cingulin-like 1 (CGNL1)                                                         | 2.0 |
| 256 | NM_032646 | Tweety homolog 2 (Drosophila) (TTYH2)                                           | 2.0 |
| 257 | NM_002860 | Aldehyde dehydrogenase 18 family, member A1 (ALDH18A1)                          | 2.0 |
| 258 | NM_021127 | Phorbol-12-myristate-13-acetate-induced protein 1 (PMAIP1)                      | 2.0 |
| 259 | NM_198220 | Small nuclear ribonucleoprotein polypeptide B" (SNRNPB2)                        | 2.0 |
| 260 | NM_006763 | BTG family, member 2 (BTG2)                                                     | 2.0 |
| 261 | NM_024612 | DEAH (Asp-Glu-Ala-His) box polypeptide 40 (DHX40)                               | 2.0 |
| 262 | NM_001846 | Collagen, type IV, alpha 2 (COL4A2)                                             | 2.0 |
| 263 | NM_000675 | Adenosine A2a receptor (ADORA2A)                                                | 2.0 |
| 264 | NM_003548 | Histone cluster 2, H4a (HIST2H4A)                                               | 2.0 |
| 265 | NM_182797 | Phospholipase C, beta 4 (PLCB4)                                                 | 2.0 |
| 266 | NM_003901 | Sphingosine-1-phosphate lyase 1 (SGPL1)                                         | 2.0 |
| 267 | NM_012255 | 5'-3' exoribonuclease 2 (XRN2)                                                  | 2.0 |
| 268 | XM_088476 | Thioredoxin domain containing 4 (endoplasmic reticulum) (TXNDC4)                | 2.0 |
| 269 | NM_004965 | High-mobility group nucleosome binding domain 1 (HMGN1)                         | 2.0 |
| 270 | NM_153261 | Chromosome 16 open reading frame 69 (C16orf69)                                  | 2.0 |
| 271 | NM_005683 | G protein-coupled receptor 55 (GPR55)                                           | 2.0 |
| 272 | NM_044472 | Cell division cycle 42 (GTP binding protein, 25kDa) (CDC42)                     | 2.0 |
| 273 | NM_032747 | Upregulated during skeletal muscle growth 5 homolog (mouse) (USMG5)             | 2.0 |
| 274 | NM_013279 | Chromosome 11 open reading frame 9 (C11orf9)                                    | 2.0 |

|     |           |                                                                                         |     |
|-----|-----------|-----------------------------------------------------------------------------------------|-----|
| 275 | NM_032812 | Plexin domain containing 2 (PLXDC2)                                                     | 0.5 |
| 276 | NM_000640 | Interleukin 13 receptor, alpha 2 (IL13RA2)                                              | 0.5 |
| 277 | NM_153746 | Zinc finger, DHHC-type containing 14 (ZDHHC14)                                          | 0.5 |
| 278 | NM_005953 | Metallothionein 2A (MT2A)                                                               | 0.5 |
| 279 | NM_033405 | Peroxisomal proliferator-activated receptor A interacting complex 285 (PRIC285)         | 0.5 |
| 280 | NM_000027 | Aspartylglucosaminidase (AGA)                                                           | 0.5 |
| 281 | NM_173582 | Phosphoglucomutase 2-like 1 (PGM2L1)                                                    | 0.5 |
| 282 | NM_181504 | Phosphoinositide-3-kinase, regulatory subunit 1 (p85alpha) (PIK3R1)                     | 0.5 |
| 283 | NM_013445 | Glutamate decarboxylase 1 (brain, 67kDa) (GAD1), transcript variant GAD25               | 0.5 |
| 284 | NM_181803 | Ubiquitin-conjugating enzyme E2C (UBE2C)                                                | 0.5 |
| 285 | NM_018836 | Adherens junction associated protein 1 (AJAP1)                                          | 0.5 |
| 286 | NM_021805 | Single immunoglobulin and toll-interleukin 1 receptor (TIR) domain (SIGIRR)             | 0.5 |
| 287 | NM_021136 | reticulon 1 (RTN1)                                                                      | 0.5 |
| 288 | NM_006795 | EH-domain containing 1 (EHD1)                                                           | 0.5 |
| 289 | NM_021021 | Syntrophin, beta 1 (dystrophin-associated protein A1, 59kDa, basic component 1) (SNTB1) | 0.5 |
| 290 | NM_152496 | Mannosidase, endo-alpha-like (MANEAL)                                                   | 0.5 |
| 291 | NM_016379 | Variable charge, X-linked 3A (VCX3A)                                                    | 0.5 |
| 292 | XM_352408 | Similar to Collagen alpha 1(II) chain precursor (LOC376816)                             | 0.4 |
| 293 | NM_012419 | Regulator of G-protein signalling 17 (RGS17)                                            | 0.4 |
| 294 | NM_175622 | Metallothionein 1J (MT1J)                                                               | 0.4 |
| 295 | NM_005360 | v-maf musculoaponeurotic fibrosarcoma oncogene homolog (avian) (MAF)                    | 0.4 |
| 296 | NM_002999 | syndecan 4 (SDC4)                                                                       | 0.4 |
| 297 | NM_013231 | fibronectin leucine rich transmembrane protein 2 (FLRT2)                                | 0.4 |
| 298 | NM_032884 | Chromosome 1 open reading frame 94 (C1orf94)                                            | 0.4 |
| 299 | NM_015035 | Zinc fingers and homeoboxes 3 (ZHX3)                                                    | 0.4 |
| 300 | NM_014468 | VENT homeobox homolog (Xenopus laevis) (VENTX)                                          | 0.4 |
| 301 | NM_018192 | Leprecan-like 1 (LEPREL1)                                                               | 0.4 |
| 302 | NM_020677 | NmrA-like family domain containing 1 (NMRAL1)                                           | 0.4 |
| 303 | NM_198315 | Loss of heterozygosity, 11, chromosomal region 2, gene A (LOH11CR2A)                    | 0.4 |
| 304 | NM_007150 | Zinc finger protein 185 (LIM domain) (ZNF185)                                           | 0.4 |
| 305 | NM_018330 | KIAA1598 (KIAA1598)                                                                     | 0.4 |
| 306 | NM_002514 | Nephroblastoma overexpressed gene (NOV)                                                 | 0.3 |
| 307 | NM_138632 | TRIO and F-actin binding protein (TRIOBP)                                               | 0.3 |
| 308 | NM_182528 | Complement component 1, q subcomponent-like 2 (C1QL2)                                   | 0.3 |
| 309 | NM_052889 | Caspase-1 dominant-negative inhibitor pseudo-ICE (COP1)                                 | 0.3 |
| 310 | NM_003122 | Serine peptidase inhibitor, Kazal type 1 (SPINK1)                                       | 0.3 |
| 311 | XM_375042 | DKFZP434B061 protein (DKFZP434B061)                                                     | 0.2 |
| 312 | NM_002846 | Protein tyrosine phosphatase, receptor type, N (PTPRN)                                  | 0.1 |
