# Supplementary material
Source: PubMed Central journal article supplement (PMC2659615)
Supplement: NIHMS94044-supplement-Table_4.pdf [file NIHMS94044-supplement-Table_4.pdf]

ODF 1.0

HeaderLines= 9

Model= Gene List

COLUMN\_NAMES:Feature

Description

COLUMN\_TYPES:String

String

float

COLUMN\_DESCS:Name of the

Description of the gene.

Distance from reference gene.

MarkerSelectionMethod= Continuous

GeneName= Z48481\_at\_NA\_illumina

DistanceFunction= Euclidean

NumNeighbors= 15191

DataLines= 15191

| N  | Target ID                      | Description                                 | Score     |
|----|--------------------------------|---------------------------------------------|-----------|
| 1  | Z48481_at_NA_illumina          | MT-MMP protein                              | 0         |
| 2  | U66059_cds7_at_NA_illumina     | TCRBV1S1A1N1 gene extracted from            | 2012.3337 |
| 3  | HG3319-HT3496_s_at_NA_illumina | Split Gene 1 Enhancer, Tup1-Like            | 2044.1316 |
| 4  | M34667_at_GI_33598945-A        | PLCG1 Phospholipase C, gamma 1              | 2044.6802 |
| 5  | M87284_at_GI_8051624-A         | 69/71 KD                                    | 2080.5542 |
| 6  | HG243-HT243_s_at_NA_illumina   | Lowe Oculocerebrorenal Syndrome             | 2083.9236 |
| 7  | U77827_at_GI_4504090-S         | Orphan G protein-coupled receptor           | 2084.0466 |
| 8  | L13434_at_NA_illumina          | Chromosome 3p21.1 gene sequence             | 2114.1865 |
| 9  | X66894_s_at_GI_4557588-S       | FACC Fanconi anemia complementation         | 2145.438  |
| 10 | D88613_at_GI_45269132-S        | HGCMA                                       | 2148.3267 |
| 11 | X97160_rna1_at_GI_21359903-S   | TFE3 transcription factor gene extracted    | 2158.8982 |
| 12 | X99687_at_NA_illumina          | Methyl-CpG-binding protein 2, intron 2      | 2165.1611 |
| 13 | Y08302_at_GI_4503420-S         | MAP kinase phosphatase 4                    | 2166.3406 |
| 14 | M29581_at_GI_33438574-S        | ZNF8 Zinc finger protein 8 (clone HF.18)    | 2172.3496 |
| 15 | U24056_s_at_NA_illumina        | Inward rectifier K+ channel protein (hirk2) | 2179.5518 |
| 16 | U52830_at_NA_illumina          | Cri-du-chat region mRNA, clone CSC8         | 2182.0735 |
| 17 | X80763_s_at_NA_illumina        | HTR2C 5-hydroxytryptamine (serotonin)       | 2184.6533 |
| 18 | HG960-HT960_at_NA_illumina     | Guanine Nucleotide Exchange Factor 1        | 2187.7837 |
| 19 | X90978_at_NA_illumina          | An acute myeloid leukaemia protein          | 2189.3987 |
| 20 | HG4336-HT4606_at_NA_illumina   | Bactericidal Bpi'Gene                       | 2189.5771 |
| 21 | X83973_at_GI_33356178-S        | TTF-I                                       | 2193.3801 |
| 22 | M20747_s_at_GI_4507010-S       | SLC2A4 Solute carrier family 2 (facilitated | 2193.7532 |
| 23 | X97249_at_GI_41352696-S        | Leucine-rich primary response protein 1     | 2195.7188 |
| 24 | U86409_at_GI_20302154-A        | Hyaluronan synthase 3 (HAS3) gene,          | 2195.8064 |
| 25 | HG4167-HT4437_at_NA_illumina   | Nuclear Factor 1, A Type                    | 2196.7754 |
| 26 | U37251_at_GI_4508008-S         | ZNF177 KRAB zinc finger protein             | 2204.1401 |
| 27 | U34962_at_GI_4758089-S         | Transcription factor HCSX (hCsx) mRNA       | 2212.3677 |
| 28 | U25750_at_NA_illumina          | Chromosome 17q21 mRNA clone 1046:1-         | 2213.5823 |
| 29 | U79252_at_GI_42766427-S        | Clone 23679 mRNA                            | 2215.5974 |
| 30 | U66052_at_NA_illumina          | Clone W2-6 mRNA from chromosome X           | 2217.1167 |
| 31 | M85247_at_GI_16445404-S        | Dopamine D1A receptor gene, complete        | 2223.9565 |

|    |                              |                                           |           |
|----|------------------------------|-------------------------------------------|-----------|
| 32 | D56495_at_GI_10835249-S      | Reg-related sequence derived peptide-1    | 2224.005  |
| 33 | M55040_at_GI_7710156-A       | ACHE Acetylcholinesterase (YT blood       | 2227.7664 |
| 34 | U20428_at_GI_21264629-S      | SNC19 mRNA sequence                       | 2230.5    |
| 35 | HG3255-HT3432_at_NA_illumina | Gamma-Aminobutyric Acid (Gaba) A          | 2233.5542 |
| 36 | HG2525-HT2621_at_NA_illumina | Helix-Loop-Helix Protein Delta Max, Alt.  | 2234.9026 |
| 37 | X90763_at_GI_15431313-S      | Type I keratin, hHa5                      | 2237.123  |
| 38 | S81264_s_at_GI_44921604-S    | Hs-TBX2=T-box gene {T-box region}         | 2238.7046 |
| 39 | J02888_at_GI_4505416-S       | NMOR2 Quinone oxidoreductase (NQO2)       | 2239.614  |
| 40 | X55005_rna1_at_NA_illumina   | C-erbA-1 mRNA for thyroid hormone         | 2239.799  |
| 41 | M26683_at_GI_22538812-S      | SCYA2 Small inducible cytokine A2         | 2240.934  |
| 42 | M87434_at_NA_illumina        | 69/71 KD                                  | 2241.4102 |
| 43 | X90761_at_GI_15431311-S      | HHKa2 protein                             | 2241.6658 |
| 44 | U70064_s_at_NA_illumina      | Lysosomal trafficking regulator (LYST)    | 2243.0295 |
| 45 | X97544_at_GI_5454119-S       | TIM17 preprotein translocase              | 2245.2588 |
| 46 | HG1723-HT1729_at_NA_illumina | Macrophage Scavenger Receptor, Alt.       | 2250.1206 |
| 47 | X07024_at_NA_illumina        | TRANSCRIPTION INITIATION FACTOR           | 2251.392  |
| 48 | U44755_at_GI_4507102-S       | PSE-binding factor PTF delta subunit      | 2252.0354 |
| 49 | U79718_at_GI_38455392-S      | Endonuclease III homolog mRNA             | 2252.4956 |
| 50 | X99141_at_GI_15431322-S      | Hair keratin, hHb3                        | 2253.395  |
| 51 | U33839_at_NA_illumina        | No description available for U33839       | 2259.4185 |
| 52 | X97444_f_at_NA_illumina      | Transmembrane protein Tmp21-Ilex          | 2260.5552 |
| 53 | L76224_at_GI_6006004-S       | NMDA receptor mRNA                        | 2260.595  |
| 54 | D14889_at_GI_34485717-S      | Small GTP-binding protein, S10            | 2261.7961 |
| 55 | HG2028-HT2082_at_NA_illumina | Laminin, A Polypeptide                    | 2262.6914 |
| 56 | U66828_s_at_NA_illumina      | Carnitine palmitoyltransferase I (CPTI)   | 2264.8503 |
| 57 | U64315_s_at_GI_4885216-S     | XPF Xeroderma pigmentosum,                | 2265.378  |
| 58 | X79981_at_GI_14589894-S      | CDH5 Cadherin 5, VE-cadherin (vascular    | 2265.4158 |
| 59 | U96629_rna2_at_GI_41281366-S | 2A8.3 gene (hereditary multiple exostoses | 2271.6372 |
| 60 | M94172_s_at_GI_4502522-S     | N-type calcium channel alpha-1 subunit    | 2271.8926 |
| 61 | U87408_at_NA_illumina        | Clone IMAGE:30008 unknown protein         | 2274.8567 |
| 62 | M64108_at_GI_37555875-S      | Udulin 1 mRNA, 3' end                     | 2275.7515 |
| 63 | X80915_rna1_at_GI_5123452-S  | Gdf5 gene                                 | 2277.7466 |
| 64 | X64269_at_NA_illumina        | TCF6L1 Transcription factor 6-like 1      | 2282.456  |
| 65 | U09303_at_GI_31317225-S      | Placenta LERK-2 (EPLG2) mRNA              | 2283.129  |
| 66 | X62573_at_GI_21361190-S      | FCGR2B Fc fragment of IgG, low affinity   | 2284.304  |
| 67 | U39905_at_GI_4506986-S       | SLC18A1 Solute carrier family 18          | 2285.06   |
| 68 | D85245_at_NA_illumina        | TR3beta                                   | 2288.2212 |
| 69 | U63541_at_NA_illumina        | mRNA expressed in HC/HCC livers and       | 2289.9778 |
| 70 | X69115_at_GI_37551348-S      | ZNF37A Zinc finger protein 37a (KOX 21)   | 2290.2673 |
| 71 | X82206_s_at_GI_13325058-S    | ALPHA-CENTRACTIN                          | 2290.3542 |
| 72 | Z31357_at_GI_4502754-S       | CDO1 Cysteine dioxygenase, type 1         | 2291.2485 |
| 73 | M83181_at_GI_4504530-S       | Serotonin receptor gene                   | 2292.4575 |
| 74 | J03930_at_GI_13787191-S      | ALKALINE PHOSPHATASE, INTESTINAL          | 2294.2888 |

|     |                                |                                              |           |
|-----|--------------------------------|----------------------------------------------|-----------|
| 75  | U57623_s_at_GI_10938020-S      | FATTY ACID-BINDING PROTEIN, HEART            | 2297.322  |
| 76  | U09477_at_GI_5032188-S         | Clone 53BP1 p53-binding protein mRNA,        | 2297.762  |
| 77  | U31176_at_GI_4885264-S         | HERV1 mRNA                                   | 2299.174  |
| 78  | U77846_rna1_s_at_NA_illumina   | Elastin gene, partial cds and partial 3'UTR  | 2300.6667 |
| 79  | M33684_s_at_NA_illumina        | (clone lambda-16-1) non-receptor tyrosine    | 2300.7874 |
| 80  | Z70219_at_GI_7662245-S         | 5'UTR for unknown protein (clone             | 2306.0542 |
| 81  | U71088_at_NA_illumina          | MAP kinase kinase MEK5c mRNA                 | 2308.3118 |
| 82  | U59878_at_GI_20127508-S        | Low-Mr GTP-binding protein (RAB32)           | 2309.919  |
| 83  | X02750_at_GI_4506114-S         | PROC Protein C (inactivator of coagulation   | 2311.7773 |
| 84  | M80629_at_GI_14110389-A        | Cdc2-related protein kinase (CHED)           | 2314.3303 |
| 85  | M91592_at_GI_34147656-S        | ZNF76 Zinc finger protein 76                 | 2314.997  |
| 86  | HG4606-HT5011_at_NA_illumina   | Contractin, Alpha                            | 2315.9526 |
| 87  | U67674_at_GI_4506972-S         | SLC15A2 Solute carrier family 15             | 2318.32   |
| 88  | D86977_at_GI_41406095-S        | KIAA0224 gene                                | 2318.9692 |
| 89  | Z48054_at_NA_illumina          | PXR1 Peroxisome receptor 1                   | 2319.0742 |
| 90  | U59736_at_NA_illumina          | Transcription factor (NFATc.b) mRNA          | 2319.621  |
| 91  | U69645_at_GI_24307924-S        | Zinc finger protein mRNA                     | 2322.696  |
| 92  | HG273-HT273_s_at_NA_illumina   | Lymphocyte Antigen Hla-G3                    | 2323.342  |
| 93  | M92303_at_GI_40804469-I        | DIHYDROPRYRIDINE-SENSITIVE L-                | 2324.86   |
| 94  | Y07829_xpt4_at_GI_16445349-A   | Exon A2 from H.sapiens gene encoding         | 2326.6436 |
| 95  | M62783_at_GI_4557780-S         | NAGA N-acetylgalactosaminidase, alpha-       | 2326.8486 |
| 96  | J00212_f_at_GI_4504594-S       | IFNA21 Interferon, alpha 21                  | 2327.248  |
| 97  | U16127_at_GI_28605144-S        | GRIK5 Glutamate receptor, ionotropic,        | 2327.8196 |
| 98  | D85527_at_NA_illumina          | LIM domain, partial cds                      | 2328.4573 |
| 99  | U78793_at_NA_illumina          | Folate receptor alpha (hFR) mRNA, partial    | 2329.1672 |
| 100 | L22454_at_GI_28882054-S        | Nuclear respiratory factor-1 (NRF-1)         | 2329.5732 |
| 101 | L20815_at_GI_26787969-S        | S protein mRNA                               | 2331.4756 |
| 102 | D78129_at_GI_6806899-S         | Squalene epoxidase, partial cds              | 2334.2769 |
| 103 | X51435_s_at_GI_4504388-S       | HIVEP1 Human immunodeficiency virus          | 2334.5452 |
| 104 | Z80783_at_NA_illumina          | H2B/l gene                                   | 2334.9807 |
| 105 | X14675_at_NA_illumina          | Bcr-abl mRNA 5' fragment (clone 3c)          | 2335.5066 |
| 106 | Z67743_at_GI_39725672-S        | Chloride channel protein (CLCN7) mRNA,       | 2341.6646 |
| 107 | L04282_at_GI_11415035-S        | CACCC box-binding protein mRNA               | 2344.4785 |
| 108 | K01383_at_GI_28866959-S        | Metallothionein-I-A gene, complete coding    | 2344.4805 |
| 109 | U21858_at_GI_38570151-A        | HISTONE H3.3                                 | 2344.7405 |
| 110 | D63877_at_GI_20127649-S        | KIAA0241 gene, partial cds                   | 2345.987  |
| 111 | X72632_s_at_NA_illumina        | Rev-ErbAalpha protein (hRev gene)            | 2348.1958 |
| 112 | HG3920-HT4521_s_at_NA_illumina | Homeotic Protein A1, Class I, Alt. Splice 1  | 2349.397  |
| 113 | X76104_at_GI_4826683-S         | DAP-kinase mRNA                              | 2353.2764 |
| 114 | M55422_at_GI_7705388-S         | Krueppel-related zinc finger protein (H-plk) | 2355.8335 |
| 115 | Z15114_at_GI_31377808-S        | PRKCG Protein kinase C, gamma                | 2357.7598 |
| 116 | J04809_rna1_at_GI_4502010-S    | Cytosolic adenylate kinase (AK1) gene        | 2360.8472 |
| 117 | M63175_at_GI_21071002-A        | AMFR Autocrine motility factor receptor      | 2363.4553 |

|     |                                |                                             |           |
|-----|--------------------------------|---------------------------------------------|-----------|
| 118 | X66417_at_GI_4885160-S         | KAPPA CASEIN PRECURSOR                      | 2363.6582 |
| 119 | AF002700_at_GI_22091444-S      | RET ligand 2 (RETL2) mRNA                   | 2364.3035 |
| 120 | X86012_at_NA_illumina          | DNA sequence from intron 22 of the factor   | 2364.8708 |
| 121 | U49837_at_GI_4502892-S         | LIM protein MLP mRNA                        | 2364.8904 |
| 122 | HG2639-HT2735_s_at_NA_illumina | Single-Stranded Dna-Binding Protein Mssp-   | 2366.615  |
| 123 | L14754_at_GI_4504622-S         | IGHMBP2 DNA-binding protein (SMBP2)         | 2367.4336 |
| 124 | U09410_at_NA_illumina          | ZNF131 Zinc finger protein 131 (clone pHZ-  | 2369.5703 |
| 125 | HG908-HT908_at_NA_illumina     | Mg61 Protein (Gb:L08239)                    | 2371.678  |
| 126 | HG2480-HT2576_at_NA_illumina   | Fmlp-Related Receptor I                     | 2371.705  |
| 127 | Z49105_at_NA_illumina          | HD21 mRNA                                   | 2373.3062 |
| 128 | X65867_at_GI_4557268-S         | ADENYLOSUCCINATE LYASE                      | 2374.4438 |
| 129 | Z69915_at_NA_illumina          | mRNA (clone ICRFp507L1876)                  | 2374.7668 |
| 130 | Y00414_s_at_GI_40786545-S      | TH Tyrosine hydroxylase                     | 2374.906  |
| 131 | L42563_at_GI_10280617-S        | ATP1AL1 ATP-driven ion pump                 | 2375.7573 |
| 132 | U67369_at_GI_4885266-S         | Growth factor independence-1 (Gfi-1)        | 2375.964  |
| 133 | Z69720_at_GI_4505232-S         | MPG N-methylpurine-DNA glycosylase          | 2376.5789 |
| 134 | D84307_at_GI_4505650-S         | Phosphoethanolamine cytidyltransferase      | 2378.9658 |
| 135 | X01715_at_GI_7382453-S         | Gene fragment for the acetylcholine         | 2379.3076 |
| 136 | M21812_at_NA_illumina          | MYL2 Myosin, light polypeptide 2,           | 2379.696  |
| 137 | L03785_at_GI_4505304-S         | MYL5 Myosin, light polypeptide 5,           | 2380.2786 |
| 138 | M37984_rna1_at_GI_4507614-S    | Slow twitch skeletal muscle/cardiac muscle  | 2380.4326 |
| 139 | U58675_cds2_at_GI_4505518-S    | OR17-40 gene extracted from Human           | 2381.7268 |
| 140 | HG406-HT406_at_NA_illumina     | P97 Antigen, Melanoma-Specific              | 2382.9143 |
| 141 | HG1602-HT1602_at_NA_illumina   | Utrophin                                    | 2382.9304 |
| 142 | D31840_s_at_NA_illumina        | DRPLA Dentatorubral-pallidoluysian          | 2383.187  |
| 143 | U47677_at_NA_illumina          | Transcription factor E2F like protein       | 2386.3452 |
| 144 | U03486_at_GI_32483411-A        | Connexin40 gene                             | 2386.93   |
| 145 | M37245_at_GI_21361211-S        | Ig superfamily cytotoxic T-lymphocyte-      | 2387.7424 |
| 146 | M25269_at_GI_11496880-S        | ELK1 ELK1, member of ETS oncogene           | 2388.971  |
| 147 | X83705_s_at_NA_illumina        | C-sis proto-oncogene                        | 2389.2898 |
| 148 | U29700_at_GI_10198655-S        | Anti-mullerian hormone type II receptor     | 2389.9336 |
| 149 | M55671_at_GI_4506120-S         | VITAMIN K-DEPENDENT PROTEIN Z               | 2391.8252 |
| 150 | L10378_at_GI_40354196-S        | (clone CTG-B43a) mRNA sequence              | 2392.6555 |
| 151 | X75962_at_GI_23312366-S        | OX40L RECEPTOR PRECURSOR                    | 2394.747  |
| 152 | D83243_at_GI_4505430-S         | ATM Ataxia telangiectasia mutated           | 2396.7405 |
| 153 | D87435_at_GI_4758415-S         | ARF3 ADP-ribosylation factor 3              | 2399.843  |
| 154 | U85245_at_GI_20336255-A        | Phosphatidylinositol-4-phosphate 5-kinase   | 2400.1099 |
| 155 | M95712_at_GI_33188458-S        | BRAF V-raf murine sarcoma viral             | 2401.8396 |
| 156 | HG846-HT846_at_NA_illumina     | Cyclophilin-Related Protein                 | 2402.692  |
| 157 | AB006190_at_GI_4502186-S       | Aquaporin 6                                 | 2403.6487 |
| 158 | J05500_at_GI_22507315-S        | SPTB Spectrin, beta, erythrocytic (includes | 2403.8445 |
| 159 | X59244_f_at_GI_4508026-S       | ZNF43 Zinc finger protein 43 (HTF6)         | 2405.6904 |
| 160 | U79266_at_NA_illumina          | Clone 23627 mRNA                            | 2407.7227 |

|     |                                |                                             |           |
|-----|--------------------------------|---------------------------------------------|-----------|
| 161 | D79992_at_GI_7661965-S         | KIAA0170 gene                               | 2408.6292 |
| 162 | AC002115_cds3_at_NA_illumina   | F25451_3 gene extracted from Human          | 2408.6833 |
| 163 | M93107_at_GI_44680134-A        | D-BETA-HYDROXYBUTYRATE                      | 2410.5251 |
| 164 | Z22536_at_GI_33598911-A        | SERINE/THREONINE-PROTEIN KINASE             | 2410.991  |
| 165 | U16812_s_at_GI_33457353-S      | Bak protein mRNA                            | 2411.106  |
| 166 | U89896_at_GI_21314777-S        | Casein kinase I gamma 2 mRNA                | 2411.624  |
| 167 | U34380_rna1_s_at_GI_4507428-S  | TEC gene extracted from Human protein       | 2411.913  |
| 168 | X83928_at_GI_21269863-S        | Transcription factor TFIIID subunit TAFII28 | 2415.722  |
| 169 | HG1879-HT1919_at_NA_illumina   | Ras-Like Protein Tc10                       | 2418.2317 |
| 170 | U46571_at_GI_4507712-S         | Tetratricopeptide repeat protein (tpr2)     | 2418.5515 |
| 171 | U58766_at_GI_6598326-S         | FX protein mRNA                             | 2419.2754 |
| 172 | M22348_s_at_GI_20070231-S      | UQCRB Ubiquinol-cytochrome c reductase      | 2419.4863 |
| 173 | S75578_s_at_NA_illumina        | 4-aminobutyrate aminotransferase            | 2423.07   |
| 174 | X92106_at_GI_33591068-S        | Bleomycin hydrolase                         | 2425.8342 |
| 175 | X92720_at_GI_4758885-S         | Phosphoenolpyruvate carboxykinase           | 2426.043  |
| 176 | D28588_at_GI_41281667-S        | SP2 Sp2 transcription factor                | 2426.5583 |
| 177 | U28963_at_GI_14270480-A        | Gps2 (GPS2) mRNA                            | 2426.6975 |
| 178 | U79275_at_NA_illumina          | Clone 23947 mRNA, partial cds               | 2426.891  |
| 179 | U48405_at_GI_40217828-S        | G protein coupled receptor OGR1 gene        | 2429.431  |
| 180 | HG2415-HT2511_at_NA_illumina   | Transcription Factor E2f-2                  | 2431.7217 |
| 181 | X58521_at_GI_34335245-A        | NUCLEAR PORE GLYCOPROTEIN P62               | 2433.0383 |
| 182 | U13395_at_GI_18860887-A        | Oxidoreductase (HHCMA56) mRNA               | 2434.137  |
| 183 | L21893_at_GI_4506970-S         | SLC10A1 Na/taurocholate cotransporting      | 2434.6082 |
| 184 | L19493_s_at_GI_4503764-S       | FRAGILE X MENTAL RETARDATION 1              | 2435.542  |
| 185 | D38145_at_GI_21536455-S        | Prostacyclin synthase                       | 2436.1597 |
| 186 | M60091_at_NA_illumina          | GALT Galactose-1-phosphate uridyl           | 2436.306  |
| 187 | U07418_at_NA_illumina          | MLH1 DNA mismatch repair protein MLH1       | 2440.5361 |
| 188 | S78085_at_GI_21735591-A        | PDCD2 Programmed cell death 2               | 2441.0098 |
| 189 | M14764_at_GI_4505392-S         | NGFR Nerve growth factor receptor           | 2441.6274 |
| 190 | D30036_at_NA_illumina          | PHOSPHATIDYLINOSITOL                        | 2442.8398 |
| 191 | HG982-HT982_s_at_NA_illumina   | Pre-T/Nk-Cell-Associated Protein 1f6        | 2443.2576 |
| 192 | X60003_s_at_NA_illumina        | CAMP-RESPONSE ELEMENT BINDING               | 2443.598  |
| 193 | Y08265_s_at_NA_illumina        | DAN26 protein, partial                      | 2445.3179 |
| 194 | HG3994-HT4264_at_NA_illumina   | Cpg-Enriched Dna, Clone S16                 | 2449.9739 |
| 195 | L04953_at_GI_22035547-S        | NEURON-SPECIFIC X11 PROTEIN                 | 2450.1785 |
| 196 | U34301_r_at_NA_illumina        | Nonmuscle myosin heavy chain IIB gene,      | 2451.3833 |
| 197 | U80073_at_GI_34335249-S        | Tip associating protein (TAP) mRNA          | 2451.4207 |
| 198 | Z25884_at_GI_4502866-S         | CIC-1 muscle chloride channel protein       | 2452.1033 |
| 199 | HG358-HT358_at_NA_illumina     | Homeotic Protein 7, Notch Group             | 2452.1794 |
| 200 | X13482_at_GI_4507120-S         | U2 SMALL NUCLEAR                            | 2452.5664 |
| 201 | HG2148-HT2218_f_at_NA_illumina | Mucin 3, Intestinal (Gb:M55406)             | 2454.6284 |
| 202 | U40990_at_NA_illumina          | Putative voltage-gated potassium channel    | 2454.701  |
| 203 | HG4533-HT4938_at_NA_illumina   | Kallistatin, Protease Inhibitor 4           | 2455.2717 |

|     |                                |                                            |           |
|-----|--------------------------------|--------------------------------------------|-----------|
| 204 | X69636_at_NA_illumina          | mRNA sequence (15q11-13)                   | 2456.7207 |
| 205 | U07358_at_GI_21735551-S        | Protein kinase (zpk) mRNA                  | 2458.4663 |
| 206 | X65873_at_GI_4758647-S         | KINESIN HEAVY CHAIN                        | 2458.8774 |
| 207 | D26535_s_at_NA_illumina        | DLST Dihydrolipoamide S-                   | 2458.9565 |
| 208 | U13022_at_NA_illumina          | Negative regulator of programmed cell      | 2459.1777 |
| 209 | D87073_at_GI_4827062-S         | KIAA0236 gene                              | 2459.6182 |
| 210 | M95549_at_GI_4507032-S         | SLC5A2 Solute carrier family 5             | 2459.7507 |
| 211 | D49487_s_at_GI_4557714-S       | LEP Leptin (murine obesity homolog)        | 2461.8667 |
| 212 | D14811_at_GI_7661917-S         | KIAA0110 gene                              | 2462.6736 |
| 213 | U39400_at_GI_27436906-S        | NOF1 mRNA                                  | 2463.809  |
| 214 | L07758_at_GI_5902033-S         | IEF SSP 9502 mRNA                          | 2463.9094 |
| 215 | U37707_at_GI_21536463-S        | DLG3 Homolog 3 of Drosophila large discs   | 2465.9282 |
| 216 | S77576_at_NA_illumina          | ERV9 reverse transcriptase homolog         | 2466.9966 |
| 217 | X66142_s_at_NA_illumina        | PDE6B Phosphodiesterase 6B, cGMP-          | 2467.458  |
| 218 | X85786_at_GI_16905514-S        | BINDING REGULATORY FACTOR                  | 2468.2883 |
| 219 | U78575_at_GI_4505814-S         | 68 kDa type I phosphatidylinositol-4-      | 2468.829  |
| 220 | HG4113-HT4383_s_at_NA_illumina | Olfactory Receptor Or17-201                | 2470.5684 |
| 221 | L43575_s_at_NA_illumina        | (clone EST02946) mRNA                      | 2471.1736 |
| 222 | D38550_at_GI_12669913-S        | KIAA0075 gene, partial cds                 | 2473.3875 |
| 223 | L00635_at_GI_42476119-S        | FNTB Farnesyltransferase, CAAX box,        | 2474.3157 |
| 224 | U31342_at_GI_39725676-S        | NUCLEOBINDIN PRECURSOR                     | 2474.3684 |
| 225 | U18300_at_NA_illumina          | DDB2 Damage-specific DNA binding           | 2474.6245 |
| 226 | S70609_at_GI_5902093-S         | Glycine transporter type 1b [human,        | 2475.1467 |
| 227 | M16405_at_NA_illumina          | MUSCARINIC ACETYLCHOLINE                   | 2475.8142 |
| 228 | X92098_at_NA_illumina          | Transmembrane protein rnp24                | 2476.8584 |
| 229 | M16282_at_NA_illumina          | Fragile X locus M2C containing an          | 2477.4868 |
| 230 | D25248_at_GI_40807505-A        | Randomly sequenced mRNA                    | 2477.69   |
| 231 | X04391_at_GI_24431962-S        | CD5 CD5 antigen (p56-62)                   | 2477.9211 |
| 232 | L12535_at_GI_34577082-A        | RSU-1/RSP-1 mRNA                           | 2479.8164 |
| 233 | U61166_at_GI_4504796-S         | SH3 domain-containing protein SH3P17       | 2481.7827 |
| 234 | U43177_at_GI_12056477-S        | Mpv17 protein (MPV17) gene, partial cds;   | 2483.2766 |
| 235 | X52943_at_GI_5802979-S         | TRANSCRIPTION FACTOR ATF-A AND             | 2483.5999 |
| 236 | S74221_at_GI_11038650-S        | IK                                         | 2483.676  |
| 237 | J03133_at_GI_38372900-S        | SP1 Sp1 transcription factor               | 2484.418  |
| 238 | Y08409_at_GI_42764629-S        | Spot14 gene                                | 2486.4783 |
| 239 | M93143_at_NA_illumina          | PLGL Plasminogen-like protein              | 2486.6934 |
| 240 | U23143_at_GI_24942125-S        | Mitochondrial serine                       | 2486.9084 |
| 241 | L15189_s_at_NA_illumina        | MITOCHONDRIAL STRESS-70 PROTEIN            | 2487.8462 |
| 242 | U47635_at_GI_37537693-S        | D13S824E locus mRNA                        | 2488.9282 |
| 243 | M37755_f_at_GI_4506176-S       | PSG7 Pregnancy-specific beta 1-            | 2489.7834 |
| 244 | L43579_s_at_NA_illumina        | L43579 Soares fetal liver spleen 1NFLS     | 2490.865  |
| 245 | U09414_at_GI_4507988-S         | ZNF137 Zinc finger protein 137 (clone pHZ- | 2491.4055 |
| 246 | X07315_at_GI_5031984-S         | NUCLEAR TRANSPORT FACTOR 2                 | 2492.2996 |

|     |                                |                                            |           |
|-----|--------------------------------|--------------------------------------------|-----------|
| 247 | D63160_at_GI_8051585-A         | Serum lectin P35                           | 2492.9578 |
| 248 | U07158_at_GI_34147603-S        | Syntaxin mRNA                              | 2493.0005 |
| 249 | X72177_rna1_at_GI_4559405-S    | C6 gene, exon 1                            | 2493.1016 |
| 250 | D42085_at_NA_illumina          | KIAA0095 gene                              | 2493.187  |
| 251 | HG3725-HT3981_s_at_NA_illumina | Insulin-Like Leydig Hormone                | 2493.6157 |
| 252 | U07681_at_GI_28178835-S        | NAD(H)-specific isocitrate dehydrogenase   | 2494.386  |
| 253 | M15465_s_at_NA_illumina        | PKLR Pyruvate kinase, liver                | 2495.0264 |
| 254 | U17579_rna1_at_NA_illumina     | Growth hormone-releasing hormone           | 2495.163  |
| 255 | U96131_at_NA_illumina          | HPV16 E1 protein binding protein mRNA      | 2495.179  |
| 256 | X96969_at_GI_21361371-S        | Urea transporter                           | 2496.6042 |
| 257 | U40490_at_GI_33695085-A        | NAD(P) transhydrogenase                    | 2498.923  |
| 258 | AC000064_cds1_at_NA_illumina   | WUGSC:H_RG083M05.2 gene extracted          | 2499.465  |
| 259 | U56244_at_NA_illumina          | HIG-1 mRNA                                 | 2500.9233 |
| 260 | Y09216_at_GI_5922002-A         | Protein kinase, Dyrk2                      | 2501.1318 |
| 261 | X14789_at_GI_14043059-S        | CRYAA Crystallin alpha-A                   | 2501.4429 |
| 262 | U66406_at_GI_38201712-S        | EPLG8 Eph-related receptor tyrosine        | 2501.8835 |
| 263 | U49441_at_NA_illumina          | Mitochondrial trifunctional protein beta   | 2502.8906 |
| 264 | D87453_at_GI_16950608-S        | KIAA0264 gene, partial cds                 | 2503.2974 |
| 265 | L77561_at_NA_illumina          | DGS-D mRNA, 3' end                         | 2503.4827 |
| 266 | U26312_s_at_GI_20544152-A      | Heterochromatin protein HP1Hs-gamma        | 2503.7224 |
| 267 | U79716_at_GI_27436939-A        | Reelin (RELN) mRNA                         | 2504.2292 |
| 268 | U80226_s_at_NA_illumina        | Gamma-aminobutyric acid transaminase       | 2505.268  |
| 269 | U25975_at_NA_illumina          | Serine kinase (hPAK65) mRNA, partial cds   | 2506.4321 |
| 270 | X81625_at_NA_illumina          | EUKARYOTIC PEPTIDE CHAIN                   | 2509.6343 |
| 271 | HG2668-HT2764_at_NA_illumina   | Bradykinin Receptor                        | 2510.1418 |
| 272 | HG2290-HT2386_at_NA_illumina   | Calcitonin                                 | 2512.7185 |
| 273 | D86972_at_NA_illumina          | KIAA0218 gene                              | 2514.8967 |
| 274 | U09412_at_GI_4507982-S         | ZNF134 Zinc finger protein 134 (clone pHZ- | 2515.0596 |
| 275 | U47334_at_GI_8924257-S         | Gamma aminobutyric acid receptor beta4     | 2515.2405 |
| 276 | U66618_at_GI_21264350-S        | SWI/SNF complex 60 KDa subunit             | 2516.0134 |
| 277 | X80923_at_NA_illumina          | Nov gene                                   | 2517.723  |
| 278 | U58087_at_GI_32307160-S        | Hs-cul-1 mRNA                              | 2519.711  |
| 279 | HG830-HT830_at_NA_illumina     | Potassium Channel (Gb:L02750)              | 2519.784  |
| 280 | X79865_at_NA_illumina          | Mrp17 mRNA                                 | 2519.954  |
| 281 | HG1205-HT1205_at_NA_illumina   | Collagen, Type Iv, Alpha 2, N-Terminus     | 2521.2456 |
| 282 | M28209_at_GI_41350195-S        | RAS-RELATED PROTEIN RAB-1A                 | 2522.2678 |
| 283 | U46023_at_GI_4885170-S         | Xq28 mRNA                                  | 2522.9268 |
| 284 | L13761_rna1_at_GI_5016092-S    | Dihydrolipoamide dehydrogenase gene,       | 2522.9917 |
| 285 | L34075_at_GI_19924298-S        | FRAP FK506 binding protein 12-rapamycin    | 2523.7012 |
| 286 | M29994_s_at_GI_4507188-S       | Alpha-I spectrin gene, exon 12             | 2524.0088 |
| 287 | U90543_s_at_NA_illumina        | Butyrophilin (BTF1) mRNA                   | 2524.1013 |
| 288 | L38616_at_GI_40353762-S        | Brain and reproductive organ-expressed     | 2524.2654 |
| 289 | HG2264-HT2360_at_NA_illumina   | Atpase, Ca2+ Transporting, Plasma          | 2524.8523 |

|     |                              |                                            |           |
|-----|------------------------------|--------------------------------------------|-----------|
| 290 | X76132_at_NA_illumina        | DCC Deleted in colorectal carcinoma        | 2525.5815 |
| 291 | J04031_at_GI_13699867-S      | MTHFD Methylenetetrahydrofolate            | 2526.3528 |
| 292 | D64158_at_NA_illumina        | ATP binding protein associated with cell   | 2527.4897 |
| 293 | Z36715_at_GI_44955920-S      | Net transcription factor                   | 2529.7354 |
| 294 | U88629_at_GI_34222159-S      | RNA polymerase II elongation factor ELL2   | 2531.5874 |
| 295 | M16938_s_at_GI_24497542-A    | Homeo box c8 protein, mRNA                 | 2531.7405 |
| 296 | AC002477_s_at_NA_illumina    | PAC clone DJ327A19 from Xq25-q26,          | 2532.2244 |
| 297 | U70867_at_GI_5032094-S       | Prostaglandin transporter hPGT mRNA        | 2532.8271 |
| 298 | AC000063_s_at_GI_31377801-S  | Clone lambda 5 semaphorin mRNA             | 2533.0217 |
| 299 | HG3454-HT3647_at_NA_illumina | Zinc Finger Protein 20                     | 2534.3235 |
| 300 | X80497_at_GI_4505780-S       | PHOSPHORYLASE B KINASE ALPHA               | 2535.1143 |
| 301 | X06272_at_GI_23308696-S      | SRPR Signal recognition particle receptor  | 2535.9473 |
| 302 | HG3578-HT3781_at_NA_illumina | Autoimmune Antigen, Thyroid Disease-       | 2538.2463 |
| 303 | X03072_at_GI_16936523-S      | Int-1 mammary oncogene                     | 2538.349  |
| 304 | HG4018-HT4288_at_NA_illumina | Opioid-Binding Cell Adhesion Molecule      | 2538.8655 |
| 305 | M64174_at_GI_4504802-S       | TYROSINE-PROTEIN KINASE JAK1               | 2539.2588 |
| 306 | X92521_at_GI_13027793-A      | Clone rasi-1 matrix metalloproteinase      | 2539.6763 |
| 307 | X13461_s_at_NA_illumina      | CALMODULIN-RELATED PROTEIN NB-1            | 2539.7732 |
| 308 | Y08836_at_GI_10864040-A      | HRX-like protein                           | 2540.9224 |
| 309 | M14158_cds4_at_NA_illumina   | T-cell receptor beta-chain J1.3 gene       | 2541.1028 |
| 310 | X17254_at_GI_32483408-S      | GATA1 Transcription factor Eryf1           | 2541.9988 |
| 311 | U62437_at_GI_4502832-S       | Neuronal nicotinic acetylcholine receptor  | 2542.0383 |
| 312 | X79200_at_NA_illumina        | Homo sapiens mRNA for SYT-SSX protein      | 2542.3064 |
| 313 | X86570_at_GI_14917114-S      | Acidic hair keratin 1                      | 2542.3428 |
| 314 | L76380_at_GI_34878691-S      | (clone HSNME29) CGRP type 1 receptor       | 2542.5693 |
| 315 | U08815_at_GI_5803166-S       | Splicesomal protein (SAP 61) mRNA          | 2543.3354 |
| 316 | U15782_at_GI_4557494-S       | CSTF3 Cleavage stimulation factor, 3' pre- | 2544.736  |
| 317 | X76538_at_GI_37059781-S      | MPV17 MpV17 transgene, murine              | 2544.967  |
| 318 | U05040_at_GI_17402899-S      | FUSE binding protein mRNA                  | 2546.33   |
| 319 | U60269_cds3_at_NA_illumina   | Putative envelope protein; orf similar to  | 2546.4673 |
| 320 | D14663_at_NA_illumina        | KIAA0107 gene                              | 2547.3782 |
| 321 | M85164_at_GI_41872447-A      | ELK4 SRF accessory protein 1B (SAP-1)      | 2548.3445 |
| 322 | U14575_at_GI_20336237-A      | (ard-1) mRNA                               | 2548.5818 |
| 323 | U49082_at_GI_40795668-S      | Transporter protein (g17) mRNA             | 2549.1616 |
| 324 | U61263_at_GI_29171691-A      | Acetolactate synthase homolog mRNA         | 2549.5925 |
| 325 | X52479_at_GI_4506066-S       | PRKCA Protein kinase C, alpha              | 2550.5603 |
| 326 | U80017_rna3_at_NA_illumina   | Smn gene (survival motor neuron protein    | 2550.8584 |
| 327 | D31797_at_NA_illumina        | CD40LG CD40 antigen ligand (hyper IgM      | 2551.1213 |
| 328 | M96954_s_at_NA_illumina      | TIAL1 TIA1 cytotoxic granule-associated    | 2551.2798 |
| 329 | U68018_at_NA_illumina        | Mad protein homolog (hMAD-2) mRNA          | 2551.2812 |
| 330 | Z35085_s_at_NA_illumina      | KIAA0203 gene                              | 2552.7368 |
| 331 | U25435_at_GI_5729789-S       | Transcriptional repressor (CTCF) mRNA      | 2553.8914 |
| 332 | U27831_at_GI_22095374-S      | Striatum-enriched phosphatase (STEP)       | 2553.9475 |



|     |                               |                                           |           |
|-----|-------------------------------|-------------------------------------------|-----------|
| 333 | J02982_f_at_GI_8051603-S      | GYPB Glycophorin B                        | 2554.2227 |
| 334 | U60325_at_GI_4505936-S        | POLG DNA polymerase gamma                 | 2555.3005 |
| 335 | HG4108-HT4378_at_NA_illumina  | Olfactory Receptor Or17-24                | 2556.3193 |
| 336 | U81375_at_GI_4826715-S        | Placental equilibrative nucleoside        | 2556.54   |
| 337 | X85137_s_at_NA_illumina       | Kinesin-related protein                   | 2558.0325 |
| 338 | D86963_at_GI_41406096-S       | PTB Ribosomal protein L26                 | 2558.5686 |
| 339 | X66403_at_GI_38327653-S       | CHRNE Cholinergic receptor, nicotinic,    | 2559.0007 |
| 340 | Z17240_at_NA_illumina         | HMG2 High-mobility group (nonhistone      | 2559.0308 |
| 341 | U14187_at_NA_illumina         | Receptor tyrosine kinase ligand LERK-3    | 2559.0308 |
| 342 | D10995_at_GI_4504532-S        | Serotonin 1B receptor                     | 2559.932  |
| 343 | X58199_s_at_NA_illumina       | Beta adducin                              | 2559.94   |
| 344 | U60116_at_GI_4758373-S        | Skeletal muscle LIM-protein SLIM2 mRNA,   | 2561.6892 |
| 345 | U60269_cds2_at_NA_illumina    | Putative envelope protein; orf similar to | 2563.6938 |
| 346 | L05188_f_at_GI_42734427-S     | Small proline-rich protein 2 (SPRR2B)     | 2564.6626 |
| 347 | D86979_at_GI_37550254-S       | KIAA0226 gene                             | 2566.236  |
| 348 | U18271_cds3_s_at_NA_illumina  | Thymopoietin (TMPO) gene                  | 2566.2996 |
| 349 | S72487_at_NA_illumina         | Platelet-derived endothelial cell growth  | 2566.8447 |
| 350 | U66048_at_NA_illumina         | Clone 161455 breast expressed mRNA        | 2567.2236 |
| 351 | M24900_at_NA_illumina         | V-ERBA RELATED PROTEIN EAR-1              | 2568.6572 |
| 352 | U90306_at_GI_7705554-S        | Iroquois-class homeodomain protein IRX-4  | 2568.7615 |
| 353 | U89335_cds2_at_GI_27894369-S  | NOTCH4 gene (notch4) extracted from       | 2570.3682 |
| 354 | Y13247_at_GI_25777670-S       | Fb19 mRNA                                 | 2570.852  |
| 355 | X95808_s_at_GI_42475939-A     | Protein encoded by a candidate gene,      | 2571.969  |
| 356 | X80026_at_GI_31543105-S       | B-cam mRNA                                | 2572.4412 |
| 357 | U75362_at_GI_4507848-S        | Isopeptidase T-3 (ISOT-3) mRNA            | 2572.8071 |
| 358 | AC000061_cds2_at_GI_6995995-S | WUGSC:H_133K23.1c gene extracted          | 2573.021  |
| 359 | L37936_at_GI_21361279-S       | MITOCHONDRIAL ELONGATION                  | 2573.4983 |
| 360 | S90469_at_GI_24307876-S       | Cytochrome P450 reductase [human,         | 2573.5203 |
| 361 | U81802_at_GI_4505808-S        | Phosphatidylinositol 4-kinase             | 2574.561  |
| 362 | D25547_at_GI_4885538-S        | PIMT isozyme I                            | 2577.6506 |
| 363 | X89059_at_GI_4507280-S        | Unknown protein expressed in              | 2577.9868 |
| 364 | S68874_s_at_NA_illumina       | PTGER3 Prostaglandin E receptor 3         | 2578.0962 |
| 365 | L29218_at_GI_4557476-A        | Cik2 mRNA                                 | 2578.126  |
| 366 | L37792_at_GI_4759181-S        | Syntaxin 1A mRNA                          | 2578.4534 |
| 367 | U36798_at_GI_20070126-S       | CGMP-inhibited cAMP phosphodiesterase     | 2578.5027 |
| 368 | U13706_at_NA_illumina         | ELAV-like neuronal protein 1 isoform Hel- | 2578.8518 |
| 369 | X80590_at_GI_33589819-S       | PHKG1 mRNA                                | 2579.2273 |
| 370 | M69013_at_GI_4504036-S        | GNA11 Guanine nucleotide binding protein  | 2580.2532 |
| 371 | X79781_at_GI_38016920-S       | Ray mRNA                                  | 2580.4966 |
| 372 | U43189_s_at_GI_42544175-A     | Ets transcription factors NERF-1a and     | 2581.0461 |
| 373 | M21539_at_GI_10835253-S       | Small proline rich protein (sprll) mRNA,  | 2581.13   |
| 374 | U82010_rna1_at_GI_17921981-S  | Heme A: farnesyltransferase (COX10)       | 2581.8174 |
| 375 | L47345_at_GI_4507388-S        | TCEB3 Transcription elongation factor B   | 2582.1545 |

|     |                                |                                           |           |
|-----|--------------------------------|-------------------------------------------|-----------|
| 376 | X12433_at_GI_38026872-A        | PROTEIN PHPS1-2                           | 2582.2886 |
| 377 | X66113_s_at_NA_illumina        | AUTOANTIGEN PM-SCL                        | 2583.0537 |
| 378 | HG11116-HT1116_at_NA_illumina  | Proliferating-Cell Nucleolar Antigen, 120 | 2583.651  |
| 379 | U32519_at_GI_38327551-A        | GAP SH3 binding protein mRNA              | 2584.226  |
| 380 | M19720_rna1_at_GI_34147322-S   | L-myc gene (L-myc protein) extracted from | 2585.8154 |
| 381 | D38521_at_GI_37547012-S        | KIAA0077 gene, partial cds                | 2586.5417 |
| 382 | X83492_at_NA_illumina          | Fas/Apo-1 (clone pCRTM11-Fasdelta(4,7))   | 2586.654  |
| 383 | L13848_at_GI_13514821-A        | LKP DEAD/H (Asp-Glu-Ala-Asp/His) box      | 2587.9526 |
| 384 | D80007_at_GI_42659368-S        | KIAA0185 gene, partial cds                | 2591.6565 |
| 385 | X86371_s_at_NA_illumina        | Tumour suppressor protein, HUGL           | 2592.0173 |
| 386 | X78627_at_GI_20302160-S        | Translin                                  | 2592.2573 |
| 387 | D79993_at_GI_37537713-S        | KIAA0171 gene                             | 2592.8533 |
| 388 | U10690_f_at_NA_illumina        | MAGE-5a antigen (MAGE5a) gene             | 2593.058  |
| 389 | U19948_at_NA_illumina          | Protein disulfide isomerase (PDIp) mRNA   | 2593.0896 |
| 390 | U34880_at_NA_illumina          | DPH2L                                     | 2593.2568 |
| 391 | X78924_at_GI_37622342-A        | HZF1 mRNA for zinc finger protein         | 2594.2595 |
| 392 | X14329_at_GI_4503010-S         | ACBP Arginine carboxypeptidase            | 2594.4626 |
| 393 | L15409_at_GI_38045905-A        | VON HIPPEL-LINDAU DISEASE TUMOR           | 2594.6174 |
| 394 | D55640_at_GI_14719425-S        | Monocyte PABL (pseudoautosomal            | 2595.403  |
| 395 | Z97054_xpt2_at_NA_illumina     | DNA binding protein from Human DNA        | 2595.574  |
| 396 | U16282_at_GI_5729811-S         | ELL mRNA                                  | 2596.0938 |
| 397 | M76766_at_GI_13435384-S        | GTF2B General transcription factor IIB    | 2597.7856 |
| 398 | U92436_at_GI_38505204-S        | Mutated in multiple advanced cancers      | 2597.8904 |
| 399 | M32313_at_GI_4507200-S         | SRD5A1 Steroid-5-alpha-reductase, alpha   | 2598.2341 |
| 400 | M38258_at_NA_illumina          | RARG Retinoic acid receptor, gamma 1      | 2598.4792 |
| 401 | U35005_s_at_GI_20986522-A      | STRESS-ACTIVATED PROTEIN KINASE           | 2598.4827 |
| 402 | X92396_at_GI_27545446-S        | Novel gene in Xq28 region                 | 2599.2253 |
| 403 | X69878_at_GI_4503752-A         | FLT4 Fms-related tyrosine kinase 4        | 2599.278  |
| 404 | U50315_at_GI_19923201-S        | EZH1 Enhancer of zeste (Drosophila)       | 2599.764  |
| 405 | D50912_at_GI_23111017-A        | KIAA0122 gene, partial cds                | 2600.6416 |
| 406 | HG4114-HT4384_at_NA_illumina   | Olfactory Receptor Or17-209               | 2601.4016 |
| 407 | M34276_at_GI_4505880-S         | Plasminogen mRNA                          | 2603.0845 |
| 408 | D25218_at_GI_34147329-S        | KIAA0112 gene, partial cds                | 2604.0427 |
| 409 | J05253_s_at_GI_4506452-S       | INTERPHOTORECEPTOR RETINOID-              | 2604.1577 |
| 410 | U02632_at_GI_26638649-S        | Calcium-activated potassium channel       | 2604.487  |
| 411 | X97302_at_NA_illumina          | Ptg-1 protein                             | 2605.892  |
| 412 | U23946_at_GI_5032030-S         | Putative tumor suppressor (LUCA15)        | 2606.9316 |
| 413 | M74715_s_at_GI_40354208-S      | IDUA Iduronidase, alpha-L-                | 2607.157  |
| 414 | U43965_at_NA_illumina          | ANK3 Ankyrin 3, node of Ranvier (ankyrin  | 2607.2893 |
| 415 | HG1140-HT4817_s_at_NA_illumina | Collagen, Type Vi, Alpha 2, Alt. Splice 2 | 2607.855  |
| 416 | U03270_at_GI_4757973-S         | Centrin mRNA                              | 2609.1868 |
| 417 | X63563_at_GI_4505940-S         | RPS13 RNA polymerase II polypeptide B     | 2611.703  |
| 418 | U31382_at_GI_21314630-S        | G protein gamma-4 subunit mRNA            | 2613.5823 |

|     |                                |                                               |           |
|-----|--------------------------------|-----------------------------------------------|-----------|
| 419 | X98260_at_GI_37538652-S        | M-phase phosphoprotein, mpp11                 | 2613.9392 |
| 420 | U58089_at_GI_42656583-S        | Hs-cul-3 mRNA, partial cds                    | 2614.0718 |
| 421 | M86707_at_GI_39725674-S        | GLYCYLPEPTIDE N-                              | 2614.9192 |
| 422 | D00860_at_GI_19923737-S        | PRPS1 Phosphoribosyl pyrophosphate            | 2615.497  |
| 423 | U50939_at_GI_18104960-S        | Amyloid precursor protein-binding protein     | 2616.1223 |
| 424 | HG3107-HT3283_s_at_NA_illumina | Plasma Membrane Calcium Pump                  | 2616.4844 |
| 425 | J04948_at_GI_14110398-S        | Alkaline phosphatase                          | 2616.878  |
| 426 | M21985_at_GI_4507672-S         | ORPHAN RECEPTOR TR2                           | 2617.1787 |
| 427 | S87759_at_GI_29557854-A        | Protein phosphatase 2C alpha [human,          | 2618.1892 |
| 428 | D84110_at_GI_5803140-S         | RBP-MS/type 1                                 | 2621.816  |
| 429 | L41268_f_at_NA_illumina        | Nkat2b mRNA                                   | 2622.621  |
| 430 | X13967_at_GI_6006018-S         | LIF Leukemia inhibitory factor (cholinergic   | 2623.5596 |
| 431 | U40279_at_NA_illumina          | Beta-2 integrin alphaD subunit (ITGAD)        | 2623.9155 |
| 432 | U00930_at_NA_illumina          | Clone CE29 8.1 (CAC)n/(GTG)n repeat-          | 2624.3542 |
| 433 | U37139_at_GI_27597074-S        | Beta 3-endonexin mRNA, long form and          | 2625.7517 |
| 434 | Y10936_at_NA_illumina          | Hypothetical protein downstream of DMPK       | 2626.7927 |
| 435 | D45371_at_NA_illumina          | ApM1 mRNA for GS3109 (novel adipose           | 2626.8894 |
| 436 | L40410_at_NA_illumina          | Thyroid receptor interactor (TRIP3) mRNA,     | 2627.4468 |
| 437 | X12794_at_GI_20070198-S        | V-erbA related ear-2 gene                     | 2628.68   |
| 438 | HG881-HT881_at_NA_illumina     | Mucin 6, Gastric (Gb:L07518)                  | 2629.416  |
| 439 | X73113_at_GI_4758747-S         | Fast MyBP-C                                   | 2629.554  |
| 440 | D63875_at_GI_41281407-S        | KIAA0155 gene                                 | 2630.9578 |
| 441 | HG1747-HT1764_s_at_NA_illumina | Proto-Oncogene Met, Alt. Splice Form 2        | 2631.5103 |
| 442 | U14391_at_GI_4826843-S         | Myosin-IC mRNA                                | 2632.2368 |
| 443 | U49436_at_GI_37537715-A        | EIF5 Eukaryotic translation initiation factor | 2632.3267 |
| 444 | U61276_s_at_GI_4557678-S       | Transmembrane protein Jagged 1 (HJ1)          | 2632.525  |
| 445 | HG363-HT363_at_NA_illumina     | Epidermal Growth Factor Receptor-             | 2633.2742 |
| 446 | U88902_cds1_f_at_NA_illumina   | Integrase gene extracted from Human           | 2633.4797 |
| 447 | L14812_at_GI_34577076-A        | RBL1 Retinoblastoma-like 1 (p107)             | 2633.8853 |
| 448 | U13666_at_GI_36951011-S        | G protein-coupled receptor (GPR1) gene        | 2634.037  |
| 449 | X53065_f_at_GI_5174692-S       | SPRR2A gene encoding small proline rich       | 2635.1794 |
| 450 | U40714_at_GI_38202242-S        | Tyrosyl-tRNA synthetase mRNA                  | 2635.8303 |
| 451 | U02556_at_GI_5730086-S         | RP3 mRNA                                      | 2635.9731 |
| 452 | U89336_cds3_at_GI_26787961-A   | RAGE gene (receptor for advanced              | 2636.3264 |
| 453 | D83784_at_GI_6031195-S         | KIAA0198 gene, partial cds                    | 2636.7646 |
| 454 | U11791_at_GI_17738313-S        | CCNH Cyclin H                                 | 2636.8643 |
| 455 | HG3740-HT4010_at_NA_illumina   | Basic Transcription Factor 2, 34 Kda          | 2637.2705 |
| 456 | U20647_at_NA_illumina          | ZNF151 Zinc finger protein 151 (pHZ-67)       | 2637.3796 |
| 457 | U38268_at_NA_illumina          | Cytochrome b pseudogene, partial cds          | 2637.91   |
| 458 | D86978_at_GI_42658619-S        | KIAA0225 gene, partial cds                    | 2639.0146 |
| 459 | HG919-HT919_at_NA_illumina     | Dna Polymerase, Epsilon, Catalytic            | 2639.101  |
| 460 | S78271_s_at_NA_illumina        | SB1.8/DXS423E                                 | 2639.9614 |
| 461 | Z93784_at_NA_illumina          | DNA sequence from clone RP3-398C22            | 2641.12   |

|     |                              |                                          |           |
|-----|------------------------------|------------------------------------------|-----------|
| 462 | M57609_at_GI_13518031-S      | GLI3 PROTEIN                             | 2641.683  |
| 463 | AF008937_at_GI_34447228-S    | Syntaxin-16C mRNA                        | 2641.9185 |
| 464 | M79463_s_at_NA_illumina      | PML Probable transcription factor PML    | 2641.9883 |
| 465 | L76159_at_GI_4758403-S       | FRG1 mRNA                                | 2642.4802 |
| 466 | X98001_at_GI_21359853-S      | Geranylgeranyl transferase II            | 2642.671  |
| 467 | M90366_at_GI_4508044-S       | Zona pellucida glycoprotein 2 (ZP2) mRNA | 2643.0718 |
| 468 | X14766_at_GI_38327553-S      | GABRA1 Gamma-aminobutyric acid           | 2643.3574 |
| 469 | U20582_at_NA_illumina        | Actin-like peptide mRNA, partial cds     | 2644.0574 |
| 470 | J04605_at_GI_4557834-S       | PEPD Peptidase D                         | 2645.0874 |
| 471 | Y00477_at_NA_illumina        | Bone marrow serine protease gene         | 2647.2683 |
| 472 | U83463_at_GI_5032082-S       | Scaffold protein Pbp1 mRNA               | 2647.683  |
| 473 | S71824_at_NA_illumina        | NEURAL CELL ADHESION MOLECULE,           | 2647.9856 |
| 474 | S79639_at_GI_4557570-S       | EXT1 Exostoses (multiple) 1              | 2648.3333 |
| 475 | D28483_at_GI_4506448-S       | Scr3 mRNA for RNA binding protein SCR3   | 2649.3826 |
| 476 | U18937_at_GI_18201901-S      | Histidyl-tRNA synthetase homolog (HO3)   | 2650.8987 |
| 477 | M24470_at_GI_31542848-S      | G6PD Glucose-6-phosphate                 | 2652.529  |
| 478 | X68985_s_at_NA_illumina      | HLF Hepatic leukemia factor              | 2654.0288 |
| 479 | M60284_s_at_GI_4507344-S     | Neurokinin A receptor (NK-2R) gene, exon | 2655.9033 |
| 480 | D14661_at_GI_23199973-A      | KIAA0105 gene                            | 2655.9426 |
| 481 | U82303_at_GI_38372937-S      | Unknown protein mRNA, partial cds        | 2657.9207 |
| 482 | D12775_s_at_GI_4502078-S     | AMPD3 Adenosine monophosphate            | 2660.7297 |
| 483 | Z48512_at_NA_illumina        | XG mRNA (clone PEP6)                     | 2661.8953 |
| 484 | U28831_at_GI_42656389-S      | Protein immuno-reactive with anti-PTH    | 2663.255  |
| 485 | D45132_at_GI_20336259-A      | Kidney mRNA for zinc-finger DNA-binding  | 2663.3862 |
| 486 | M80335_at_GI_31543437-S      | Protein kinase A catalytic subunit mRNA, | 2664.082  |
| 487 | HG2874-HT3018_at_NA_illumina | Ribosomal Protein L39 Homolog            | 2664.4893 |
| 488 | X96849_at_NA_illumina        | 5' mRNA of PECAM-1 molecule              | 2664.545  |
| 489 | X66397_at_GI_4507658-S       | RPL7A Neurotrophic tyrosine kinase,      | 2666.0276 |
| 490 | U49250_at_GI_22547231-S      | Putative cerebral cortex transcriptional | 2666.9072 |
| 491 | X59434_at_GI_23510449-S      | TST Thiosulfate sulfurtransferase        | 2667.0806 |
| 492 | Y11251_at_GI_4759171-S       | Novel member of serine-arginine domain   | 2668.0217 |
| 493 | U69141_at_GI_7669493-A       | GCDH Glutaryl-Coenzyme A                 | 2669.0051 |
| 494 | U09820_s_at_NA_illumina      | Helicase II (RAD54L) mRNA                | 2669.4683 |
| 495 | HG3254-HT3431_at_NA_illumina | Phosphatidylinositol 3-Kinase P110, Beta | 2669.6384 |
| 496 | U61234_at_GI_4507372-S       | Tubulin-folding cofactor C mRNA          | 2669.8164 |
| 497 | X76302_at_GI_24307918-S      | RY-1 mRNA for putative nucleic acid      | 2669.9407 |
| 498 | L13436_at_GI_4580421-A       | Guanylate cyclase mRNA, complete         | 2669.9875 |
| 499 | M89473_at_GI_7669547-S       | NEUROMEDIN K RECEPTOR                    | 2670.0796 |
| 500 | D14686_at_GI_44662837-S      | AMT Glycine cleavage system protein T    | 2671.157  |
| 501 | X93499_at_GI_40807361-S      | RAB7 protein                             | 2672.6519 |
| 502 | L76703_at_GI_31083295-S      | B56epsilon mRNA                          | 2674.5103 |
| 503 | X86018_at_NA_illumina        | MUF1 protein                             | 2675.046  |
| 504 | U19345_at_GI_31652241-A      | AR1 protein (AR) mRNA                    | 2675.1736 |

|     |                               |                                            |           |
|-----|-------------------------------|--------------------------------------------|-----------|
| 505 | X82634_at_GI_15022816-S       | Partial mRNA for hair keratin acidic 3-II  | 2675.6565 |
| 506 | U09584_at_GI_40795669-S       | PL6 protein (PL6) mRNA                     | 2676.661  |
| 507 | D83778_at_NA_illumina         | KIAA0194 gene, partial cds                 | 2677.2236 |
| 508 | X98263_at_GI_5031918-S        | M-phase phosphoprotein, mpp6               | 2678.1    |
| 509 | U43753_cds2_at_NA_illumina    | Frataxin (FRDA) gene, promoter region      | 2678.575  |
| 510 | X89398_cds2_at_GI_19718750-A  | Ung gene (uracil-DNA-glycosylase, UNG2)    | 2679.3276 |
| 511 | U91931_at_GI_32484978-S       | AP-3 complex beta3A subunit mRNA           | 2679.4663 |
| 512 | U59632_s_at_NA_illumina       | Cell division control related protein      | 2680.6567 |
| 513 | X75755_rna1_s_at_GI_4506898-S | PR264 gene                                 | 2681.2073 |
| 514 | U28049_at_NA_illumina         | TBX2 (TXB2) mRNA                           | 2685.0105 |
| 515 | U50553_at_GI_13514816-A       | Helicase like protein 2 mRNA               | 2685.2803 |
| 516 | X60592_at_NA_illumina         | CD40 CD40 antigen                          | 2685.74   |
| 517 | X17622_at_GI_25952089-S       | KCNA6 Potassium voltage-gated channel,     | 2685.9758 |
| 518 | U70426_at_GI_34452689-S       | A28-RGS14p mRNA                            | 2687.1638 |
| 519 | S78203_at_GI_31543623-S       | PEPT 2                                     | 2688.1643 |
| 520 | X89985_at_GI_20336474-A       | BCL7 B cell lymphoma protein 7B            | 2690.168  |
| 521 | Z49878_at_GI_20336211-A       | Guanidinoacetate N-methyltransferase       | 2690.9631 |
| 522 | S81243_s_at_GI_27894358-A     | Mitogen induced nuclear orphan receptor    | 2693.6082 |
| 523 | Z24680_at_NA_illumina         | Garp gene mRNA                             | 2694.182  |
| 524 | X51362_s_at_NA_illumina       | DRD2 Dopamine D2 receptor                  | 2694.2283 |
| 525 | X83378_at_GI_12025672-A       | Putative chloride channel                  | 2694.3237 |
| 526 | D83776_at_NA_illumina         | KIAA0191 gene, partial cds                 | 2695.812  |
| 527 | U20657_at_GI_40795664-S       | Ubiquitin protease (Unph) proto-oncogene   | 2696.4045 |
| 528 | K03498_xpt1_s_at_NA_illumina  | Pol protein from Human endogenous          | 2697.2532 |
| 529 | M64934_at_GI_17025233-S       | XK Kell blood group precursor (McLeod      | 2698.3018 |
| 530 | M80333_at_GI_38176159-S       | M5 muscarinic acetylcholine receptor gene  | 2698.4788 |
| 531 | X12492_at_GI_45505148-A       | CCAAT BOX-BINDING TRANSCRIPTION            | 2699.002  |
| 532 | D31889_at_GI_25777613-S       | KIAA0072 gene, partial cds                 | 2699.1226 |
| 533 | U33053_at_NA_illumina         | Lipid-activated protein kinase PRK1 mRNA   | 2699.184  |
| 534 | U20979_at_GI_4885106-S        | Chromatin assembly factor-I p150 subunit   | 2699.5383 |
| 535 | U71203_s_at_GI_31543551-S     | Rit mRNA                                   | 2700.2136 |
| 536 | L41690_at_GI_24234723-A       | TNF receptor-1 associated protein          | 2701.0586 |
| 537 | U11872_at_NA_illumina         | Interleukin-8 receptor type B (IL8RB)      | 2701.6616 |
| 538 | M86934_at_NA_illumina         | GS1 PROTEIN                                | 2703.6443 |
| 539 | U49352_at_GI_4503300-S        | Liver 2,4-dienoyl-CoA reductase mRNA       | 2704.277  |
| 540 | U49089_at_GI_10863920-S       | Neuroendocrine-dlg (NE-dlg) mRNA           | 2704.657  |
| 541 | U09564_at_GI_15834623-S       | Serine kinase mRNA                         | 2705.4229 |
| 542 | U08316_at_GI_4759049-S        | Insulin-stimulated protein kinase 1 (ISPK- | 2705.8743 |
| 543 | X89211_at_NA_illumina         | DNA for endogenous retroviral like         | 2705.9153 |
| 544 | U10117_at_GI_45006985-S       | CALMODULIN                                 | 2706.3157 |
| 545 | X66141_at_GI_4557774-S        | MYL2 Myosin, light polypeptide 2,          | 2706.5193 |
| 546 | U19557_s_at_GI_28076868-S     | Squamous cell carcinoma antigen 2          | 2706.8838 |
| 547 | U37519_at_GI_4580414-S        | ALDH8 Aldehyde dehydrogenase 8             | 2707.5715 |

|     |                                |                                             |           |
|-----|--------------------------------|---------------------------------------------|-----------|
| 548 | HG1471-HT3923_s_at_NA_illumina | Transcription Factor Oct-1a/1b, Alt. Splice | 2707.606  |
| 549 | U25165_at_GI_4826735-S         | Fragile X mental retardation protein 1      | 2709.0159 |
| 550 | S63912_at_NA_illumina          | D10S102                                     | 2709.3005 |
| 551 | X66867_cds1_at_GI_37577141-A   | Max gene extracted from H.sapiens max       | 2709.3538 |
| 552 | L36463_at_GI_4759039-S         | Ras inhibitor mRNA, 3' end                  | 2709.476  |
| 553 | X90846_at_GI_21735549-S        | MST1 Macrophage stimulating 1               | 2709.5427 |
| 554 | D87455_at_NA_illumina          | KIAA0266 gene                               | 2710.6082 |
| 555 | X07948_at_GI_34850064-S        | TNP1 Transition protein 1 (TP1)             | 2711.4873 |
| 556 | X17651_at_GI_18765726-S        | MYOG Myogenin (myogenic factor 4)           | 2711.9485 |
| 557 | M26665_s_at_NA_illumina        | HISTATIN 3 PRECURSOR                        | 2712.527  |
| 558 | HG1751-HT1768_at_NA_illumina   | Chorionic Somatomammotropin Hormone         | 2713.7244 |
| 559 | U34038_at_GI_34577051-S        | Proteinase-activated receptor-2 mRNA        | 2714.7527 |
| 560 | Z21488_at_GI_28373118-A        | CNTN1 Contactin 1                           | 2715.0183 |
| 561 | U56833_at_GI_21614497-S        | VHL binding protein-1 (VBP-1) mRNA,         | 2715.127  |
| 562 | S38953_s_at_NA_illumina        | CYP21 Cytochrome P450, subfamily XXI        | 2717.6902 |
| 563 | HG2197-HT2267_s_at_NA_illumina | Collage, Type VII, Alpha 1                  | 2717.8936 |
| 564 | HG3936-HT4206_at_NA_illumina   | Interleukin 9 Receptor (Gb:S71404)          | 2720.4275 |
| 565 | X98296_at_GI_11641422-A        | Ubiquitin hydrolase                         | 2722.0266 |
| 566 | X58255_at_NA_illumina          | Flg-2 gene for fibroblast growth factor     | 2722.5476 |
| 567 | L34060_at_GI_16306538-S        | Cadherin-8 mRNA                             | 2723.9692 |
| 568 | L18877_f_at_GI_34335236-S      | MELANOMA-ASSOCIATED ANTIGEN 12              | 2724.2532 |
| 569 | X13930_f_at_NA_illumina        | CYTOCHROME P450 IIA6                        | 2724.7617 |
| 570 | M35128_at_GI_37622909-S        | Muscarinic acetylcholine receptor gene      | 2725.2927 |
| 571 | M95610_at_GI_31083125-S        | COL9A2 Collagen, type IX, alpha 2           | 2725.5535 |
| 572 | D30742_at_GI_27477118-S        | CAMK4 Calcium/calmodulin-dependent          | 2726.7434 |
| 573 | Y13115_at_GI_21361432-S        | Serine/threonine protein kinase SAK         | 2726.7927 |
| 574 | M60483_rna1_s_at_GI_4506016-S  | Protein phosphatase-2A catalytic subunit-   | 2727.5479 |
| 575 | U83192_at_GI_4557528-S         | Post-synaptic density protein 95 (PSD95)    | 2728.3066 |
| 576 | X80878_at_NA_illumina          | R kappa B mRNA                              | 2728.589  |
| 577 | AC002115_ma2_at_GI_34147641-S  | F25451_2 gene extracted from Human          | 2729.1084 |
| 578 | X96698_at_GI_13186319-A        | D1075-like gene                             | 2729.575  |
| 579 | M35531_at_NA_illumina          | FUT1 Fucosyltransferase 1 (galactoside 2-   | 2729.731  |
| 580 | L78833_cds4_at_GI_34147320-S   | lfp35 gene extracted from Human BRCA1,      | 2729.9468 |
| 581 | Y10209_at_NA_illumina          | CD30L protein                               | 2729.9673 |
| 582 | U09411_at_GI_42733609-S        | ZNF132 Zinc finger protein 132 (clone pHZ-  | 2730.8489 |
| 583 | M30818_at_GI_11342663-S        | MX2 Myxovirus (influenza) resistance 2,     | 2732.0425 |
| 584 | X91788_at_NA_illumina          | IcIn protein                                | 2732.9062 |
| 585 | Y10055_at_GI_19923288-S        | Phosphoinositide 3-kinase                   | 2733.2427 |
| 586 | U79274_at_GI_9558740-S         | Clone 23733 mRNA                            | 2733.3792 |
| 587 | U27326_s_at_NA_illumina        | FUT3 Alpha (1,3/1,4) fucosyltransferase     | 2733.838  |
| 588 | M65217_at_GI_6806888-S         | HEAT SHOCK FACTOR PROTEIN 2                 | 2733.9895 |
| 589 | U38904_at_GI_38569444-S        | Zinc finger protein C2H2-25 mRNA            | 2735.3154 |
| 590 | X15875_at_GI_22538421-S        | CREB1 CAMP responsive element binding       | 2735.5576 |

|     |                                |                                             |           |
|-----|--------------------------------|---------------------------------------------|-----------|
| 591 | L42025_rna1_at_GI_38570131-S   | Cellular co-factor (RAB) gene               | 2736.631  |
| 592 | X78338_at_NA_illumina          | MULTIDRUG RESISTANCE-                       | 2737.0342 |
| 593 | X64229_at_GI_31542502-S        | DEK PROTEIN                                 | 2737.194  |
| 594 | S52969_cds1_s_at_GI_4503808-S  | Description: alpha-1,3 fucosyltransferase   | 2737.5908 |
| 595 | U09716_s_at_GI_10862689-S      | ERGIC-53 PROTEIN PRECURSOR                  | 2737.9297 |
| 596 | D87445_at_GI_45120116-S        | KIAA0256 gene                               | 2738.3232 |
| 597 | X83573_at_GI_4502240-S         | ARSE mRNA                                   | 2738.3743 |
| 598 | D50525_at_NA_illumina          | TI-227H                                     | 2739.4958 |
| 599 | D30715_xpt5_s_at_NA_illumina   | Exon2a from Human PAP (pancreatitis-        | 2739.8596 |
| 600 | X89101_s_at_NA_illumina        | Fas (Apo-1, CD95)                           | 2740.8062 |
| 601 | D63998_at_GI_4758697-S         | MANA2 Mannosidase, alpha type II            | 2741.5981 |
| 602 | D78367_at_GI_4557698-S         | K12 keratin                                 | 2741.6257 |
| 603 | U76366_s_at_GI_4507410-S       | TCOF1 Treacher Collins syndrome             | 2742.087  |
| 604 | L00972_at_GI_4557414-S         | CBS Cystathionine-beta-synthase             | 2742.5625 |
| 605 | U15177_at_NA_illumina          | Cosmid CRI-JC2015 at D10S289 in             | 2744.155  |
| 606 | U72509_s_at_NA_illumina        | Alternatively spliced B8 (B7) mRNA, partial | 2745.131  |
| 607 | L42572_at_GI_5803114-S         | Motor protein                               | 2745.346  |
| 608 | Z48923_at_GI_38569443-A        | BMPR-II                                     | 2745.6604 |
| 609 | M22877_at_GI_34328939-S        | CYC1 Cytochrome c-1                         | 2746.759  |
| 610 | U34587_at_GI_32307158-S        | CRHR2 Corticotropin releasing hormone       | 2749.5322 |
| 611 | U75679_at_GI_19913344-S        | Histone stem-loop binding protein (SLBP)    | 2750.1873 |
| 612 | HG1804-HT1829_at_NA_illumina   | Ornithine Aminotransferase-Like 3           | 2751.1855 |
| 613 | U16720_rna1_s_at_GI_24430216-S | Interleukin 10 (IL10) gene                  | 2751.8345 |
| 614 | D87464_at_GI_36030904-S        | KIAA0274 gene                               | 2752.1055 |
| 615 | X99140_at_GI_15431324-S        | Hair keratin, hHb5                          | 2753.1912 |
| 616 | U23803_at_GI_14110425-S        | Heterogeneous ribonucleoprotein A0          | 2753.862  |
| 617 | U19252_s_at_GI_19923163-S      | GT334 protein (GT334) gene mRNA             | 2754.2124 |
| 618 | U78524_at_GI_7706636-S         | Gu binding protein mRNA, partial cds        | 2755.4575 |
| 619 | M61199_at_GI_34222128-S        | CLEAVAGE SIGNAL-1 PROTEIN                   | 2755.6028 |
| 620 | U72761_at_NA_illumina          | Karyopherin beta 3 mRNA                     | 2755.782  |
| 621 | M17754_at_GI_4502436-S         | BN51T BN51 (BHK21) temperature              | 2756.5603 |
| 622 | U17838_at_NA_illumina          | Zinc finger protein RIZ mRNA                | 2756.8374 |
| 623 | X92110_at_NA_illumina          | HcgVIII protein                             | 2756.9692 |
| 624 | HG3344-HT3521_at_NA_illumina   | Ubiquitin-Conjugating Enzyme Ubch5          | 2757.3716 |
| 625 | U58046_s_at_GI_4503508-S       | KIAA0139 gene                               | 2757.5068 |
| 626 | Y09392_s_at_NA_illumina        | WSL-LR, WSL-S1 and WSL-S2 proteins          | 2757.608  |
| 627 | X75342_at_GI_4506934-S         | SHB SHB adaptor protein (a Src homology     | 2758.1875 |
| 628 | M36067_at_GI_4557718-S         | LIG1 Ligase I, DNA, ATP-dependent           | 2760.6497 |
| 629 | U81554_at_GI_40789255-S        | CaM kinase II isoform mRNA                  | 2760.7498 |
| 630 | L36922_at_GI_7108347-S         | Met-ase gene, exon 1                        | 2761.1167 |
| 631 | X63337_at_GI_15619004-S        | HB2A gene for high sulfur keratin           | 2761.634  |
| 632 | L17327_at_GI_31543147-S        | Pre-T/NK cell associated protein (3B3)      | 2761.7454 |
| 633 | L25444_at_GI_21536354-A        | TBP-associated factor TAFII80 mRNA          | 2762.2925 |

|     |                              |                                            |           |
|-----|------------------------------|--------------------------------------------|-----------|
| 634 | HG2149-HT2219_at_NA_illumina | Mucin (Gb:M57417)                          | 2762.4727 |
| 635 | D83004_at_GI_37577134-S      | Epidermoid carcinoma mRNA for ubiquitin-   | 2764.062  |
| 636 | U85946_at_GI_38202212-S      | Brain secretory protein hSec10p            | 2764.723  |
| 637 | AB002315_at_GI_7662051-S     | KIAA0317 gene                              | 2764.9348 |
| 638 | U15173_at_GI_4757855-S       | EEF1A1 Translation elongation factor 1-    | 2766.1877 |
| 639 | X57303_at_GI_40254468-S      | ERR Ecotropic retroviral receptor          | 2766.3591 |
| 640 | M10901_at_GI_4504132-S       | GRL Glucocorticoid receptor                | 2766.4417 |
| 641 | S79267_at_GI_21314613-S      | CD4 CD4 antigen (p55)                      | 2766.6074 |
| 642 | X84740_at_GI_7710127-A       | DNA ligase III                             | 2766.8994 |
| 643 | M15517_cds3_s_at_NA_illumina | TTR gene extracted from Human mutant       | 2766.951  |
| 644 | X56687_s_at_NA_illumina      | Ribosomal RNA upstream binding             | 2767.232  |
| 645 | HG4074-HT4344_at_NA_illumina | Rad2                                       | 2767.7168 |
| 646 | X86681_at_GI_38708298-S      | Nucleolar protein, HNP36                   | 2767.819  |
| 647 | U93237_rna2_at_GI_18860850-A | MEN1 gene (menin) extracted from Human     | 2769.2222 |
| 648 | D78586_at_GI_18105006-S      | CAD PROTEIN                                | 2770.1514 |
| 649 | Y11306_rna1_at_GI_13540470-S | HTcf-4 gene extracted from H.sapiens       | 2770.596  |
| 650 | M29204_at_GI_44890064-S      | GC-RICH SEQUENCE DNA-BINDING               | 2770.9863 |
| 651 | X76942_s_at_NA_illumina      | 72.1 protein                               | 2771.0833 |
| 652 | M13485_at_GI_27414494-S      | Metallothionein I-B gene                   | 2771.8772 |
| 653 | U66578_at_GI_4885310-S       | Purinergic receptor P2Y9 mRNA              | 2772.5154 |
| 654 | D83703_at_GI_21361243-S      | Peroxisome assembly factor-2               | 2773.9028 |
| 655 | U18018_at_GI_24307882-S      | ETV4 Ets variant gene 4 (E1A enhancer-     | 2774.1836 |
| 656 | HG2846-HT2983_at_NA_illumina | Dihydrofolate Reductase, Alt. Splice 6     | 2774.721  |
| 657 | U58130_at_GI_4557848-S       | Bumetanide-sensitive Na-K-2Cl              | 2776.5337 |
| 658 | L77730_at_GI_6031156-S       | ADORA3 Adenosine receptor A3               | 2776.7048 |
| 659 | U10492_at_GI_21396476-A      | MEOX1 Homeobox protein mox1                | 2777.1575 |
| 660 | Z35307_at_GI_4503442-S       | ECE1 Endothelin converting enzyme 1        | 2777.3276 |
| 661 | Y11897_at_NA_illumina        | Brx gene 3'UTR                             | 2777.64   |
| 662 | U55258_at_GI_41281388-S      | HBRAVO/Nr-CAM precursor (hBRAVO/Nr-        | 2777.7168 |
| 663 | X82877_at_GI_5730020-S       | Na+-D-glucose cotransport regulator gene   | 2778.0283 |
| 664 | X97198_at_GI_19743932-A      | Receptor protein tyrosine phosphatase      | 2778.1653 |
| 665 | U86759_s_at_GI_5453809-S     | Netrin-2 like protein (NTN2I) mRNA         | 2778.2063 |
| 666 | Y11710_rna1_at_NA_illumina   | Extracellular matrix protein collagen type | 2779.1191 |
| 667 | L11284_at_NA_illumina        | DUAL SPECIFICITY MITOGEN-                  | 2779.4072 |
| 668 | M74099_at_GI_31652237-A      | CUTL1 Cut (Drosophila)-like 1 (CCAAT       | 2780.3984 |
| 669 | U33936_s_at_GI_32484974-A    | Adenosine kinase mRNA                      | 2780.5225 |
| 670 | X90530_at_GI_8051628-A       | RagB protein                               | 2781.0798 |
| 671 | U15552_at_NA_illumina        | Acidic 82 kDa protein mRNA                 | 2781.971  |
| 672 | J04111_at_GI_44890066-S      | C-jun proto oncogene (JUN), clone hCJ-1    | 2782.7212 |
| 673 | U76638_at_GI_4557348-S       | BRCA1-associated RING domain protein       | 2783.2312 |
| 674 | L27841_at_GI_34878901-S      | Autoantigen pericentriol material 1 (PCM-  | 2783.5098 |
| 675 | Y08612_at_GI_24497452-S      | RABAPTIN-5 protein                         | 2783.975  |
| 676 | X03484_at_GI_4506400-S       | RAF1 V-raf-1 murine leukemia viral         | 2784.2734 |



|     |                              |                                             |           |
|-----|------------------------------|---------------------------------------------|-----------|
| 677 | M55265_at_GI_29570792-A      | CSNK2A1 Casein kinase 2, alpha 1            | 2784.778  |
| 678 | U01824_at_GI_40254477-S      | Glutamate transporter                       | 2784.9602 |
| 679 | X92762_at_GI_31317262-A      | Tafazzins protein                           | 2785.193  |
| 680 | M99063_at_NA_illumina        | KERATIN, TYPE II CYTOSKELETAL 2             | 2785.395  |
| 681 | M15059_at_GI_34147598-S      | FCER2 Fc fragment of IgE, low affinity II,  | 2785.7053 |
| 682 | D32202_at_GI_15451760-A      | ADRA1C Adrenergic, alpha-1C-, receptor      | 2786.19   |
| 683 | D79984_s_at_GI_27597089-S    | KIAA0162 gene                               | 2786.5732 |
| 684 | M88163_at_GI_21071045-A      | SNF2L1 SNF2 (sucrose nonfermenting,         | 2787.0579 |
| 685 | U38276_at_NA_illumina        | Semaphorin III family homolog mRNA          | 2787.165  |
| 686 | M34353_s_at_GI_19924164-S    | ROS1 Transmembrane tyrosine-specific        | 2787.2346 |
| 687 | X96401_at_GI_9945317-S       | ROX protein                                 | 2787.398  |
| 688 | M13143_at_GI_9257226-S       | KLK3 Plasma prekallikrein                   | 2787.4265 |
| 689 | U73328_at_GI_20143959-A      | DLX7 Distal-less homeobox 7                 | 2787.7422 |
| 690 | U31929_s_at_NA_illumina      | DAX-1                                       | 2788.0486 |
| 691 | L13689_at_NA_illumina        | BMI1 Murine leukemia viral (bmi-1)          | 2788.1921 |
| 692 | D38437_f_at_NA_illumina      | PMS8 mRNA (yeast mismatch repair gene       | 2788.3276 |
| 693 | X82103_at_GI_34222324-S      | Beta-COP                                    | 2788.5098 |
| 694 | K03008_cds2_at_GI_13377001-S | Gamma-G2-psi gene extracted from            | 2788.716  |
| 695 | HG3971-HT4241_at_NA_illumina | Transcription Factor (Gb:L32162)            | 2789.3237 |
| 696 | Z25535_at_GI_24430145-S      | Nuclear pore complex protein hnup153        | 2789.7595 |
| 697 | HG315-HT315_at_NA_illumina   | Beta-1-Glycoprotein 11, Pregnancy-          | 2790.5156 |
| 698 | U70322_at_GI_23510380-A      | Transportin (TRN) mRNA                      | 2791.038  |
| 699 | Y07847_at_GI_42476128-S      | RRP22 protein                               | 2791.3335 |
| 700 | U27330_at_GI_4503812-S       | FUT5 Fucosyltransferase 5 (alpha (1,3)      | 2792.853  |
| 701 | U46461_at_GI_32479518-A      | Dishevelled homolog (DVL) mRNA              | 2793.079  |
| 702 | L43579_at_NA_illumina        | L43579 Soares fetal liver spleen 1NFLS      | 2793.6091 |
| 703 | AF007875_at_GI_4503362-S     | Dolichol monophosphate mannose              | 2796.1494 |
| 704 | U52521_at_GI_7657209-S       | Arfaptin 1, putative target protein of ADP- | 2796.5283 |
| 705 | S81419_at_NA_illumina        | Dystrophin, dystrophin {Purkinje promoter,  | 2797.283  |
| 706 | D16593_at_GI_19913445-S      | HPCA Hippocalcin                            | 2797.6914 |
| 707 | D43948_at_NA_illumina        | KIAA0097 gene                               | 2797.7422 |
| 708 | M13058_s_at_NA_illumina      | PRH1 Proline-rich protein HaellI subfamily  | 2797.7874 |
| 709 | U38964_s_at_NA_illumina      | PMS2 related (hPMSR2) gene                  | 2798.936  |
| 710 | D13435_at_GI_27894289-A      | PIGF Phosphatidylinositol glycan, class F   | 2799.3748 |
| 711 | U44848_at_NA_illumina        | Nuclear respiratory factor 1 (NRF-1)        | 2799.946  |
| 712 | U02310_at_GI_9257221-S       | FKHR Homolog 1 of Drosophila forkhead       | 2800.277  |
| 713 | X53793_at_GI_17388802-S      | MULTIFUNCTIONAL PROTEIN ADE2                | 2800.8625 |
| 714 | L22343_at_NA_illumina        | Nuclear phosphoprotein mRNA                 | 2800.9832 |
| 715 | D31888_at_NA_illumina        | KIAA0071 gene, partial cds                  | 2801.7004 |
| 716 | U31986_at_GI_5901917-S       | Cartilage-specific homeodomain protein      | 2801.8604 |
| 717 | W38002_s_at_NA_illumina      | No info for gene                            | 2802.0164 |
| 718 | U52077_s_at_GI_5730038-S     | Mariner1 transposase gene, complete         | 2802.0847 |
| 719 | M80482_at_NA_illumina        | PACE4 Paired basic amino acid cleaving      | 2802.267  |

|     |                              |                                              |           |
|-----|------------------------------|----------------------------------------------|-----------|
| 720 | Z37976_at_GI_4557732-S       | LTBP2 Latent transforming growth factor      | 2802.2683 |
| 721 | D87845_at_GI_4758877-S       | Platelet-activating factor acetylhydrolase 2 | 2802.7195 |
| 722 | D87845_at-2_NA_illumina      | Platelet-activating factor acetylhydrolase 2 | 2802.7195 |
| 723 | M90299_at_GI_15967158-A      | GCK Glucokinase (hexokinase 4, maturity      | 2803.1533 |
| 724 | Z11899_s_at_GI_42560247-A    | POU5F1 Octamer binding protein 3             | 2803.4788 |
| 725 | M90356_f_at_GI_37539782-S    | BTF3 protein homologue gene                  | 2803.5786 |
| 726 | HG884-HT884_s_at_NA_illumina | Oncogene E6-Ap, Papillomavirus               | 2803.8816 |
| 727 | U07223_at_GI_4757979-S       | Beta2-chimaerin mRNA                         | 2803.9885 |
| 728 | X15525_rna1_at_GI_4557009-S  | Lysosomal acid phosphatase gene (EC          | 2804.544  |
| 729 | HG4557-HT4962_at_NA_illumina | Small Nuclear Ribonucleoprotein U1,          | 2804.7634 |
| 730 | X51804_at_NA_illumina        | PUTATIVE RECEPTOR PROTEIN                    | 2807.1057 |
| 731 | U17714_at_GI_21237722-S      | Putative tumor suppressor (SNC6) mRNA        | 2807.2527 |
| 732 | M75715_s_at_GI_4759033-S     | EUKARYOTIC PEPTIDE CHAIN                     | 2807.8315 |
| 733 | M32879_s_at_NA_illumina      | CYP11B1 Cytochrome P450 11 beta              | 2808.9163 |
| 734 | D38498_f_at_NA_illumina      | PMS8 mRNA (yeast mismatch repair gene        | 2809.2627 |
| 735 | U77665_at_GI_19923360-S      | RNaseP protein p30 (RPP30) mRNA              | 2809.7722 |
| 736 | D80008_at_NA_illumina        | KIAA0186 gene                                | 2810.016  |
| 737 | M73720_at_GI_4503000-S       | CPA3 Carboxypeptidase A3 (mast cell)         | 2810.0354 |
| 738 | X68994_at_NA_illumina        | CREB gene, exon Y                            | 2810.3342 |
| 739 | U18291_at_GI_14110370-S      | CDC16Hs mRNA                                 | 2810.83   |
| 740 | M15990_at_GI_21071041-S      | C-yes-1 mRNA                                 | 2811.271  |
| 741 | L31584_at_GI_30795213-S      | CMKBR7 Chemokine (C-C) receptor 7            | 2811.7595 |
| 742 | U77846_rna1_at_GI_5881412-S  | Elastin gene, partial cds and partial 3'UTR  | 2811.8525 |
| 743 | X98248_rna1_at_GI_17149812-S | Sortilin                                     | 2812.0735 |
| 744 | D29640_s_at_GI_32261305-S    | Ras GTPase-activating-like protein           | 2812.1934 |
| 745 | M37197_at_GI_42542391-S      | COUP TRANSCRIPTION FACTOR                    | 2812.2117 |
| 746 | M25296_at_GI_4505432-S       | NPPB Natriuretic peptide precursor B         | 2812.3994 |
| 747 | S74445_at_GI_4758051-S       | Cellular retinoic acid-binding protein       | 2812.512  |
| 748 | U46194_at_GI_7657497-S       | Renal cell carcinoma antigen RAGE-4          | 2812.5513 |
| 749 | M85169_at_GI_8670543-A       | Homologue of yeast sec7 mRNA                 | 2812.5623 |
| 750 | M22995_at_GI_4506412-S       | RAP1A RAP1A, member of RAS                   | 2812.6362 |
| 751 | D79991_at_NA_illumina        | KIAA0169 gene, partial cds                   | 2813.0808 |
| 752 | HG36-HT4101_s_at_NA_illumina | Polymyositis/Scleroderma (Pm-Scl)            | 2813.4153 |
| 753 | U30872_at_GI_14670380-S      | CENP-F kinetochore protein mRNA              | 2815.5261 |
| 754 | U65928_at_GI_38027922-S      | JUN V-jun avian sarcoma virus 17             | 2817.1687 |
| 755 | M64929_at_GI_32307111-S      | PPP2R2A Protein phosphatase 2 (formerly      | 2817.5647 |
| 756 | M59911_at_GI_6006010-A       | ITGA3 Integrin alpha-3 subunit               | 2819.0452 |
| 757 | U16296_at_GI_4507500-S       | TIAM1 T-cell lymphoma invasion and           | 2819.822  |
| 758 | U63455_at_GI_9910116-S       | SUR Sulfonylurea receptor                    | 2820.0762 |
| 759 | X77909_at_GI_26787990-S      | IKBL mRNA                                    | 2820.8435 |
| 760 | M92439_at_GI_31621304-S      | 130 KD LEUCINE-RICH PROTEIN                  | 2821.361  |
| 761 | L41887_rna1_at_GI_24415993-S | Splicing factor, arginine/serine-rich 7      | 2821.4255 |
| 762 | X68560_at_GI_38373692-S      | SP3 Sp3 transcription factor                 | 2822.0735 |

|     |                                |                                            |           |
|-----|--------------------------------|--------------------------------------------|-----------|
| 763 | D64015_at_GI_13435392-A        | TIAL1 TIA1 cytotoxic granule-associated    | 2822.1738 |
| 764 | D42053_at_GI_41350325-S        | KIAA0091 gene                              | 2822.7021 |
| 765 | J02943_at_GI_4580418-S         | CBG Corticosteroid binding globulin        | 2823.0068 |
| 766 | U25771_at_NA_illumina          | ARF4L ADP-ribosylation factor 4-like       | 2824.135  |
| 767 | M91467_at_GI_4504536-S         | HTR1E 5-hydroxytryptamine (serotonin)      | 2826.4377 |
| 768 | U03272_at_GI_4755135-S         | FBN2 Fibrillin 2                           | 2826.9685 |
| 769 | X15357_at_GI_40254425-S        | Natriuretic peptide receptor (ANP-A        | 2827.2314 |
| 770 | X99699_at_NA_illumina          | XIAP associated factor-1                   | 2828.0059 |
| 771 | D50922_at_GI_45269143-A        | KIAA0132 gene                              | 2829.0464 |
| 772 | Z12830_at_NA_illumina          | SSR1 Signal sequence receptor, alpha       | 2829.8293 |
| 773 | D14878_at_GI_5174422-S         | Protein D123                               | 2830.18   |
| 774 | D89377_at_NA_illumina          | Adult tooth pulp of third molar fibroblast | 2833.0479 |
| 775 | X04366_at_GI_12408655-S        | CALPAIN 1, LARGE                           | 2833.5532 |
| 776 | M99439_at_GI_38327621-S        | Transducin-like enhancer protein (TLE4)    | 2833.6528 |
| 777 | L22214_at_GI_4501946-S         | ADORA1 Adenosine receptor A1               | 2833.905  |
| 778 | M68941_at_GI_18104987-S        | Protein-tyrosine phosphatase mRNA          | 2834.1943 |
| 779 | D87450_at_GI_42734324-S        | KIAA0261 gene, partial cds                 | 2834.7473 |
| 780 | X78669_at_GI_4506456-S         | ERC-55 mRNA                                | 2835.492  |
| 781 | X59373_at_GI_23510365-S        | HOX4D mRNA for a homeobox protein          | 2835.547  |
| 782 | U96113_at_GI_33946331-S        | Nedd-4-like ubiquitin-protein ligase WWP1  | 2835.631  |
| 783 | D90276_at_GI_4502796-S         | CGM7 Carcinoembryonic antigen gene         | 2836.0833 |
| 784 | L19183_at_GI_32698695-S        | MAC30 mRNA, 3' end                         | 2836.7854 |
| 785 | X74570_at_NA_illumina          | Gal-beta(1-3/1-4)GlcNAc alpha-2.3-         | 2837.7559 |
| 786 | U03398_at_GI_24119163-S        | Receptor 4-1BB ligand mRNA                 | 2838.1633 |
| 787 | M81780_cds5_at_NA_illumina     | SMPD1 gene (acid sphingomyelinase)         | 2838.6685 |
| 788 | U62136_at_GI_12025664-S        | Putative enterocyte differentiation        | 2838.7324 |
| 789 | Y07683_at_GI_28416924-S        | P2X3 purinoceptor                          | 2839.146  |
| 790 | X98534_s_at_GI_4507868-S       | VASP gene, exons 4 to 13                   | 2839.4958 |
| 791 | L05512_at_GI_21359863-S        | HTN1 Histatin 1                            | 2839.5527 |
| 792 | M13666_at_GI_4885496-S         | MYB Proto-oncogene c-myb {alternative      | 2840.5728 |
| 793 | X81003_at_GI_11386174-A        | HCG V mRNA                                 | 2840.7935 |
| 794 | U26710_at_GI_34222218-S        | Cbl-b mRNA                                 | 2840.8057 |
| 795 | X90872_at_NA_illumina          | Gp25L2 protein                             | 2841.8674 |
| 796 | M21064_at_GI_9845520-S         | S100A9 S100 calcium-binding protein A9     | 2841.8926 |
| 797 | HG4668-HT5083_s_at_NA_illumina | Transcription Factor Mef2, Alt. Splice 2   | 2842.1404 |
| 798 | U20325_at_GI_4757909-S         | Cocaine and amphetamine regulated          | 2842.3882 |
| 799 | D50857_at_GI_4503354-S         | DOCK180 protein mRNA                       | 2842.4968 |
| 800 | U59302_at_GI_22538458-A        | Steroid receptor coactivator (SRC-1)       | 2843.2659 |
| 801 | U03634_at_GI_31563332-A        | P47 LBC oncogene mRNA                      | 2843.6929 |
| 802 | M25809_at_GI_19913425-S        | ATP6B1 ATPase, H+ transporting,            | 2843.8862 |
| 803 | M87339_at_GI_31881686-A        | RFC4 Replication factor C, 37-kD subunit   | 2843.9163 |
| 804 | D29675_s_at_NA_illumina        | Inducible nitric oxide synthase gene,      | 2844.3115 |
| 805 | U51920_at_GI_20149548-S        | SRP54 Signal recognition particle 54 kD    | 2844.4924 |

|     |                              |                                              |           |
|-----|------------------------------|----------------------------------------------|-----------|
| 806 | U40846_s_at_GI_40548380-S    | NAGLU N-acetylglucosaminidase, alpha-        | 2845.3718 |
| 807 | X61615_at_NA_illumina        | LIFR Leukemia inhibitory factor receptor     | 2845.4888 |
| 808 | Z74792_s_at_NA_illumina      | CCAAT transcription binding factor subunit   | 2845.9167 |
| 809 | D21090_at_GI_19924138-S      | XP-C repair complementing protein            | 2846.4736 |
| 810 | Z35102_at_GI_31377778-S      | Ndr protein kinase                           | 2846.859  |
| 811 | X74328_rna1_at_GI_4502928-S  | CB2 (peripheral) cannabinoid receptor        | 2846.9663 |
| 812 | U76992_at_GI_34147671-S      | Tat-SF1 mRNA                                 | 2847.8396 |
| 813 | AA436974_at_GI_31880782-S    | EST: zv72h03.r1 Soares total fetus           | 2848.0535 |
| 814 | M21551_rna1_at_GI_45505142-S | Neuromedin B mRNA                            | 2848.9666 |
| 815 | U28131_at_NA_illumina        | HMGI-C chimeric transcript mRNA, partial     | 2849.8594 |
| 816 | U57450_at_NA_illumina        | PEDF Pigment epithelium-derived factor       | 2850.2915 |
| 817 | D87023_cds2_at_NA_illumina   | J1 gene extracted from Human (lambda)        | 2850.7053 |
| 818 | X69920_s_at_GI_4502546-S     | CALCR Calcitonin receptor                    | 2850.909  |
| 819 | U26266_s_at_GI_7108339-A     | DHPS Deoxyhypusine synthase                  | 2851.0688 |
| 820 | X13227_at_GI_21536469-S      | DAO D-amino-acid oxidase                     | 2851.3586 |
| 821 | Y12856_at_GI_40254830-S      | AMP-activated protein kinase alpha-1,        | 2851.4858 |
| 822 | J04162_at_GI_10835138-S      | FCGR3 Fc fragment of IgG, low affinity       | 2851.978  |
| 823 | L40400_at_NA_illumina        | (clone zap113) mRNA, 3' end of cds           | 2852.007  |
| 824 | HG2247-HT2332_at_NA_illumina | Major Intrinsic Protein                      | 2852.3232 |
| 825 | J03764_at_GI_10835158-S      | PAI1 Plasminogen activator inhibitor, type I | 2853.3032 |
| 826 | U79259_at_NA_illumina        | Clone 23945 mRNA                             | 2853.6006 |
| 827 | U47927_at_GI_4507854-S       | UBIQUITIN CARBOXYL-TERMINAL                  | 2853.9382 |
| 828 | RC_AA017517_at_NA_illumina   | EST: ze39h02.s1 Soares retina N2b4HR         | 2854.1816 |
| 829 | X60957_at_NA_illumina        | TIE Tyrosine kinase with immunoglobulin      | 2854.8665 |
| 830 | U78628_at_NA_illumina        | Leukemia inhibitory factor receptor mRNA,    | 2855.187  |
| 831 | U55764_at_GI_29553952-S      | Estrogen sulfotransferase mRNA, partial      | 2855.8901 |
| 832 | J04029_s_at_GI_37543687-S    | Keratin 10 type I intermediate filament      | 2856.7654 |
| 833 | U29656_at_GI_37693992-S      | NME1 Non-metastatic cells 1, protein         | 2857.603  |
| 834 | X55079_rna1_at_GI_11496988-S | GAA gene extracted from Human                | 2857.9133 |
| 835 | X06323_at_GI_21265090-S      | MITOCHONDRIAL 60S RIBOSOMAL                  | 2858.1582 |
| 836 | D21852_at_NA_illumina        | KIAA0029 gene, partial cds                   | 2859.2278 |
| 837 | U67934_at_NA_illumina        | 44.9 kDa protein C18B11 homolog gene,        | 2859.2898 |
| 838 | D86519_at_NA_illumina        | Truncated pancreatic polypeptide receptor    | 2859.4373 |
| 839 | D79995_at_NA_illumina        | KIAA0173 gene                                | 2859.4382 |
| 840 | S67325_at_NA_illumina        | PCCB Propionyl Coenzyme A carboxylase,       | 2860      |
| 841 | U28014_at_GI_15451908-A      | ICH-2 PROTEASE PRECURSOR                     | 2860.0708 |
| 842 | M14016_at_GI_9845521-S       | UROD Uroporphyrinogen decarboxylase          | 2860.1526 |
| 843 | L35269_at_GI_21361560-S      | ZINC FINGER PROTEIN 35                       | 2860.234  |
| 844 | U50839_at_NA_illumina        | G16 protein (g16) mRNA, partial cds          | 2860.2612 |
| 845 | L07493_at_GI_19923751-S      | RECA Replication protein A (E coli RecA      | 2861.375  |
| 846 | AF002020_at_GI_4557802-S     | Niemann-Pick C disease protein (NPC1)        | 2861.603  |
| 847 | D63506_at_GI_6005885-S       | Unc-18homologue                              | 2862.5688 |
| 848 | X63717_at_NA_illumina        | APT1 Apoptosis (APO-1) antigen 1             | 2862.9788 |

|     |                                |                                            |           |
|-----|--------------------------------|--------------------------------------------|-----------|
| 849 | U32581_at_GI_18765737-A        | Lambda/iota-protein kinase C-interacting   | 2863.3755 |
| 850 | U46901_at_GI_6806897-A         | SNCA Synuclein, alpha (non A4              | 2863.5364 |
| 851 | L07033_at_GI_4504426-S         | HMGCL 3-hydroxymethyl-3-methylglutaryl-    | 2864.0684 |
| 852 | U78107_at_GI_4505330-S         | Gamma SNAP mRNA                            | 2864.5142 |
| 853 | U47686_s_at_GI_42519913-S      | Signal transducer and activator of         | 2864.657  |
| 854 | M14219_at_GI_6552340-S         | DCN Decorin                                | 2864.8533 |
| 855 | Z80787_at_GI_21264600-S        | H4/j gene                                  | 2864.8696 |
| 856 | U18543_at_GI_15208649-S        | Zinc-finger protein mRNA                   | 2864.915  |
| 857 | D29013_at_GI_4505930-S         | POLB DNA polymerase beta subunit           | 2866.0938 |
| 858 | U47077_at_NA_illumina          | DNA-dependent protein kinase catalytic     | 2866.194  |
| 859 | U85658_at_GI_39812473-S        | Transcription factor ERF-1 mRNA            | 2866.267  |
| 860 | M95936_s_at_GI_6715585-S       | AKT2 V-akt murine thymoma viral            | 2866.5715 |
| 861 | D87673_at_GI_4557650-S         | Heat shock transcription factor 4          | 2866.5796 |
| 862 | U52191_s_at_NA_illumina        | SMCY (H-Y) mRNA                            | 2867.046  |
| 863 | M68520_at_GI_16936529-A        | CDK2 Cyclin-dependent kinase 2             | 2867.401  |
| 864 | L48728_cds1_at_NA_illumina     | TCRBV10S1 gene extracted from Homo         | 2867.6272 |
| 865 | AB003177_at_GI_34335280-S      | Proteasome subunit p27                     | 2868.3997 |
| 866 | X80910_at_GI_4506004-S         | PPP1CB Protein phosphatase 1, catalytic    | 2869.009  |
| 867 | D89858_at_GI_40217826-A        | D-aspartate oxidase                        | 2869.2715 |
| 868 | R68735_at_GI_15451925-S        | Ferritin, light polypeptide                | 2869.448  |
| 869 | Z18859_rna1_at_GI_22027523-S   | Cone transducin alpha subunit gene         | 2870.6978 |
| 870 | U03494_at_GI_34147661-S        | Transcription factor LSF mRNA              | 2870.9277 |
| 871 | D86982_at_GI_38683796-S        | KIAA0229 gene, partial cds                 | 2872.2024 |
| 872 | D28383_at_GI_21361564-S        | ATP synthase B chain, 5'UTR (sequence      | 2872.379  |
| 873 | X54637_at_GI_34222294-S        | TYK2 Protein-tyrosine kinase tyk2 (non-    | 2872.5886 |
| 874 | HG3125-HT3301_s_at_NA_illumina | Estrogen Receptor (Gb:S67777)              | 2872.7434 |
| 875 | U38847_at_GI_19743835-S        | TAR RNA loop binding protein (TRP-185)     | 2872.7827 |
| 876 | U89336_cds8_at_NA_illumina     | Unknown gene extracted from Human HLA      | 2872.907  |
| 877 | Z18954_at_GI_4506766-S         | S100A5 S100 calcium-binding protein A5     | 2873.1702 |
| 878 | AF000560_at_GI_27485046-S      | TTF-I interacting peptide 20 mRNA, partial | 2873.515  |
| 879 | D83780_at_GI_41281517-S        | KIAA0196 gene                              | 2873.9575 |
| 880 | J03260_s_at_GI_45580725-S      | GNAZ Guanine nucleotide binding protein    | 2874.6113 |
| 881 | D50925_at_GI_35038527-S        | Serine/threonine kinase mRNA, partial cds  | 2875.019  |
| 882 | L34774_s_at_NA_illumina        | Opioid-binding protein/cell adhesion       | 2875.4348 |
| 883 | D83785_at_GI_41350321-S        | KIAA0200 gene                              | 2875.5786 |
| 884 | D13720_s_at_GI_21614549-S      | TYROSINE-PROTEIN KINASE ITK/TSK            | 2875.8167 |
| 885 | L14076_at_GI_34147660-S        | PRE-MRNA SPLICING FACTOR SRP75             | 2876.8171 |
| 886 | M96980_at_GI_41352713-S        | MYELIN TRANSCRIPTION FACTOR 1              | 2877.2517 |
| 887 | U14550_at_NA_illumina          | Sialyltransferase SThM (sthm) mRNA         | 2877.3218 |
| 888 | X67683_at_NA_illumina          | Keratin 4                                  | 2877.5461 |
| 889 | U79297_at_NA_illumina          | Clone 23589 mRNA sequence                  | 2878.153  |
| 890 | U12140_at_NA_illumina          | Tyrosine kinase receptor p145TRK-B (TRK-   | 2878.2534 |
| 891 | X76040_at_NA_illumina          | HLON ATP-dependent protease mRNA,          | 2879.209  |

|     |                                |                                              |           |
|-----|--------------------------------|----------------------------------------------|-----------|
| 892 | X92715_at_GI_4508030-S         | ZNF74 Zinc finger protein 74 (Cos52)         | 2879.3345 |
| 893 | Z73677_at_NA_illumina          | Gene encoding plakophilin 1b                 | 2880.5842 |
| 894 | M15796_at_NA_illumina          | PCNA Proliferating cell nuclear antigen      | 2880.6533 |
| 895 | M91029_cds2_at_GI_34147620-A   | AMP deaminase (AMPD2) mRNA                   | 2880.7534 |
| 896 | AA211868_at_NA_illumina        | MADS box transcription enhancer factor 2,    | 2880.9617 |
| 897 | AF006087_at_GI_23397668-S      | Arp2/3 protein complex subunit p20-Arc       | 2881.9463 |
| 898 | M60746_at_NA_illumina          | Histone H3.1 (H1F3) gene                     | 2882.1484 |
| 899 | D38496_s_at_GI_5803073-S       | LZTR-1                                       | 2882.9983 |
| 900 | X61100_rna1_at_GI_33519474-S   | 75 kDa subunit NADH dehydrogenase            | 2883.3755 |
| 901 | S80905_f_at_NA_illumina        | PRB2 locus salivary proline-rich protein     | 2884.2102 |
| 902 | HG2868-HT3012_s_at_NA_illumina | Xe7, Pseudoautosomal Gene, Alt. Splice 2     | 2884.436  |
| 903 | X87344_cds10_at_GI_33438593-S  | DMA gene extracted from H.sapiens DMA,       | 2884.8284 |
| 904 | M61855_at_GI_13699817-S        | CYP2C9 Cytochrome P450, subfamily IIC        | 2884.9114 |
| 905 | L33801_at_GI_21361339-S        | Protein kinase mRNA                          | 2885.171  |
| 906 | X68561_at_GI_32307183-S        | SP4 Sp4 transcription factor                 | 2885.3228 |
| 907 | M28879_at_GI_32483414-S        | GRANZYME B PRECURSOR                         | 2886.5544 |
| 908 | S83364_at_GI_41327692-S        | Putative Rab5-interacting protein {clone L1- | 2887.6157 |
| 909 | D13628_at_GI_21328450-A        | ANGPT1 Angiopoietin 1                        | 2888.2705 |
| 910 | D50917_at_NA_illumina          | KIAA0127 gene                                | 2888.8867 |
| 911 | X63469_at_GI_34222295-S        | GTF2E2 General transcription factor TFIIE    | 2889.8877 |
| 912 | M15841_at_GI_38149980-A        | SNRPB2 Small nuclear ribonucleoprotein       | 2890.2769 |
| 913 | X54326_at_GI_4758293-S         | MULTIFUNCTIONAL AMINOACYL-TRNA               | 2891.3313 |
| 914 | U92015_at_NA_illumina          | Clone 143789 defective mariner               | 2891.668  |
| 915 | X62025_rna1_at_GI_4505672-S    | Rod cG-PDE G gene for 3', 5'-cyclic          | 2891.6729 |
| 916 | L37042_at_GI_34147516-S        | CSNK1A1 Casein kinase 1, alpha 1             | 2891.7612 |
| 917 | D26069_at_GI_40254841-S        | KIAA0041 gene, partial cds                   | 2892.3047 |
| 918 | D50926_at_NA_illumina          | KIAA0136 gene, partial cds                   | 2892.5273 |
| 919 | M21934_at_NA_illumina          | DNA 3' to a rearranged and truncated Ig      | 2892.7708 |
| 920 | X05323_at_NA_illumina          | OX-2 MEMBRANE GLYCOPROTEIN                   | 2892.7852 |
| 921 | X67697_at_GI_17402934-A        | SPERM ANTIGEN HE2 PRECURSOR                  | 2893.2036 |
| 922 | U22172_at_NA_illumina          | Human DNA damage repair and                  | 2894.578  |
| 923 | M36200_at_GI_40549443-I        | SYNAPTOBREVIN 1                              | 2894.8704 |
| 924 | D13897_rna2_at_GI_4758981-S    | Peptide YY precursor gene extracted from     | 2894.9111 |
| 925 | Z50115_s_at_GI_34222291-S      | Thimet oligopeptidase (metalloproteinase)    | 2895.6812 |
| 926 | D87446_at_GI_37539734-S        | KIAA0257 gene, partial cds                   | 2895.8105 |
| 927 | L16464_at_GI_20270187-S        | ETS-RELATED PROTEIN PE-1                     | 2896.3389 |
| 928 | M97925_rna1_at_GI_10337584-S   | Defensin 5 gene                              | 2896.4395 |
| 929 | S77415_at_GI_5174532-S         | Melanocortin-4 receptor [human, Genomic,     | 2897.2412 |
| 930 | Y10505_at_NA_illumina          | CD104 protein                                | 2897.306  |
| 931 | U61145_at_GI_23510383-A        | Enhancer of zeste homolog 2 (EZH2)           | 2897.3896 |
| 932 | RC_AA233126_at_NA_illumina     | EST: zr69b08.s1 Soares NhHMPu S1             | 2897.8726 |
| 933 | RC_AA610034_at_GI_23503318-S   | EST: af18f07.s1 Soares testis NHT Homo       | 2898.142  |
| 934 | X65962_s_at_GI_4503218-S       | CYP2C17 Cytochrome P450, subfamily IIC       | 2898.19   |

|     |                                |                                             |           |
|-----|--------------------------------|---------------------------------------------|-----------|
| 935 | U31501_at_GI_6598321-S         | Fragile X mental retardation syndrome       | 2900.3228 |
| 936 | AB003102_at_GI_28872724-S      | Proteasome subunit p44.5                    | 2900.4287 |
| 937 | RC_AA497003_at_GI_42415491-S   | EST: ae32f03.s1 Gessler Wilms tumor         | 2901.0608 |
| 938 | M26682_at_GI_4505004-S         | LMO1 LIM domain only 1 (rhombotin 1)        | 2901.8171 |
| 939 | X16416_at_GI_6382057-A         | ABL1 V-abl Abelson murine leukemia viral    | 2901.9402 |
| 940 | L13773_at_NA_illumina          | AF-4 mRNA                                   | 2901.9692 |
| 941 | M58583_at_GI_4757921-S         | CEREBELLIN 1 PRECURSOR                      | 2902.2825 |
| 942 | X64037_at_GI_4504196-S         | GTF2F1 General transcription factor IIF,    | 2902.7412 |
| 943 | U01923_at_GI_14141155-S        | BTK region clone ftp-3 mRNA                 | 2902.8586 |
| 944 | J04543_at_GI_4809277-A         | ANX7 Annexin VII (synexin)                  | 2903.4922 |
| 945 | U33838_s_at_NA_illumina        | NF-kappa-B p65delta3 mRNA, spliced          | 2903.8235 |
| 946 | U08336_at_GI_38505157-S        | Basic helix-loop-helix transcription factor | 2904.0525 |
| 947 | X55885_at_GI_32307173-S        | ER LUMEN PROTEIN RETAINING                  | 2904.4143 |
| 948 | L42324_at_GI_31542852-S        | (clone GPCR W) G protein-linked receptor    | 2904.621  |
| 949 | M55420_at_NA_illumina          | IgE chain, last 2 exons                     | 2904.7441 |
| 950 | HG4593-HT4998_at_NA_illumina   | Sodium Channel 1                            | 2904.9165 |
| 951 | S54641_s_at_GI_42733607-S      | Zinc finger protein 124 (HZF-16)            | 2905.5964 |
| 952 | L38503_at_GI_7669495-S         | GSTT2 Glutathione S-transferase theta 2     | 2905.6174 |
| 953 | X67155_at_GI_20143965-A        | MITOTIC KINESIN-LIKE PROTEIN-1              | 2905.6638 |
| 954 | HG3627-HT3836_at_NA_illumina   | Calcium Channel, Voltage-Gated, Beta 1      | 2906.7615 |
| 955 | D28915_at_GI_21361309-S        | Hepatitis C-associated microtubular         | 2908.1892 |
| 956 | M37435_at_GI_27262662-A        | CSF1 Colony-stimulating factor 1 (M-CSF)    | 2908.755  |
| 957 | H72630_at_NA_illumina          | EST: yu05a11.r1 Homo sapiens cDNA           | 2909.6301 |
| 958 | L42354_at_NA_illumina          | (clone 48ES4) mRNA fragment                 | 2909.8547 |
| 959 | HG3546-HT3744_s_at_NA_illumina | Pre-Mrna Splicing Factor Sf2p33, Alt.       | 2909.9001 |
| 960 | M62628_s_at_NA_illumina        | Alpha-1 Ig germline C-region membrane-      | 2910.2134 |
| 961 | M65131_rna1_at_GI_4557766-S    | Methylmalonyl-CoA mutase (MCM) mRNA         | 2910.2156 |
| 962 | L37360_s_at_GI_33359683-S      | (clone hEHK1-L) EHK1 receptor tyrosine      | 2910.2192 |
| 963 | L34820_at_GI_25777719-A        | NAD+-dependent succinate-semialdehyde       | 2910.445  |
| 964 | D25303_at_GI_11321594-S        | Integrin alpha subunit                      | 2910.8328 |
| 965 | X69838_at_NA_illumina          | G9a                                         | 2911.507  |
| 966 | U47105_at_NA_illumina          | H105e3 mRNA                                 | 2911.833  |
| 967 | X63359_at_NA_illumina          | UDP-GLUCURONOSYLTRANSFERASE                 | 2912.01   |
| 968 | RC_AA007497_at_GI_13470091-S   | EST: zh98c12.s1 Soares fetal liver spleen   | 2912.1729 |
| 969 | M31776_s_at_NA_illumina        | BRAIN NATRIURETIC PEPTIDE                   | 2912.6614 |
| 970 | U23430_s_at_GI_4502606-S       | CCKAR Cholecystokinin A receptor            | 2912.8213 |
| 971 | RC_AA071012_at_NA_illumina     | EST: zf79f10.s1 Soares pineal gland         | 2912.8435 |
| 972 | Y10207_at_NA_illumina          | CD171 protein                               | 2913.1536 |
| 973 | S50223_at_GI_5902159-S         | HKR-T1                                      | 2914.1252 |
| 974 | X96752_at_GI_4885386-S         | L-3-hydroxyacyl-CoA dehydrogenase           | 2914.982  |
| 975 | U90651_at_GI_24041019-A        | Embryonic ectoderm development protein      | 2915.2312 |
| 976 | U57592_at_GI_11863151-S        | Jumonji putative protein (jumonji) mRNA     | 2915.994  |
| 977 | U91327_at_GI_5453602-S         | Chromosome 12p15 BAC clone CIT987SK-        | 2916.2139 |

|      |                                |                                           |           |
|------|--------------------------------|-------------------------------------------|-----------|
| 978  | L07261_s_at_GI_29826318-A      | Alpha adducin mRNA, partial cds including | 2916.2769 |
| 979  | HG1828-HT1857_at_NA_illumina   | Nexin, Glia-Derived                       | 2916.9377 |
| 980  | U41668_at_GI_18426962-A        | DGUOK Deoxyguanosine kinase               | 2917.6902 |
| 981  | M64269_s_at_GI_21735570-S      | Mast cell chymase gene                    | 2918.1887 |
| 982  | L04733_at_GI_41055203-A        | KINESIN LIGHT CHAIN                       | 2919.138  |
| 983  | Z11559_at_GI_8659554-S         | IREB1 Iron-responsive element binding     | 2919.4568 |
| 984  | X70070_at_GI_4505476-S         | Neurotensin receptor                      | 2920.0015 |
| 985  | HG2825-HT2949_at_NA_illumina   | Ret Transforming Gene                     | 2920.29   |
| 986  | M86933_s_at_NA_illumina        | AMELY Amelogenin (chromosome Y            | 2920.5542 |
| 987  | S58733_at_NA_illumina          | Pp52                                      | 2921.7566 |
| 988  | X04729_s_at_NA_illumina        | Plasminogen activator inhibitor type 1 N- | 2922.1748 |
| 989  | HG3175-HT3352_at_NA_illumina   | Carcinoembryonic Antigen                  | 2922.1814 |
| 990  | X66365_at_GI_42741665-S        | CDK6 Cyclin-dependent kinase 6            | 2922.4858 |
| 991  | X56741_at_GI_40548385-S        | RAS-RELATED PROTEIN RAB-8                 | 2922.54   |
| 992  | D26067_at_NA_illumina          | KIAA0033 gene, partial cds                | 2922.93   |
| 993  | U14383_at_NA_illumina          | MUC8 Mucin 8, tracheobronchial            | 2923.567  |
| 994  | HG3362-HT3539_s_at_NA_illumina | Chromosomal-Translocation Associated      | 2924.0764 |
| 995  | U86782_at_GI_42734423-S        | 26S proteasome-associated pad1 homolog    | 2924.4922 |
| 996  | HG2090-HT2152_s_at_NA_illumina | External Membrane Protein, 130 Kda        | 2924.716  |
| 997  | J04501_at_GI_34222292-S        | GYS1 Glycogen synthase 1 (muscle)         | 2924.9988 |
| 998  | M97388_at_GI_45006969-S        | DR1 Down-regulator of transcription 1,    | 2925.1907 |
| 999  | HG2810-HT2921_at_NA_illumina   | Homeotic Protein PI2                      | 2925.509  |
| 1000 | X13956_at_GI_34147391-S        | 9 KD PROTEIN                              | 2926.4285 |
| 1001 | M31169_s_at_GI_24475879-S      | Propionyl-CoA carboxylase beta-subunit    | 2926.6243 |
| 1002 | D87024_at_NA_illumina          | Immunoglobulin lambda gene locus DNA,     | 2927.0566 |
| 1003 | RC_D20483_f_at_NA_illumina     | BING4                                     | 2927.719  |
| 1004 | AA207141_at_GI_21536345-A      | EST: zr87h02.r1 NCI_CGAP_GCB1 Homo        | 2927.7983 |
| 1005 | U59228_at_NA_illumina          | EDA Ectodermal dysplasia protein          | 2927.9827 |
| 1006 | L43366_at_NA_illumina          | (clone jj1b) cadherin mRNA fragment       | 2928.1133 |
| 1007 | U96094_at_GI_4507062-S         | Sarcolipin (SLN) mRNA                     | 2928.9556 |
| 1008 | X64994_at_GI_11496274-S        | HGMP07I gene for olfactory receptor       | 2929.188  |
| 1009 | D87469_at_GI_13325063-S        | KIAA0279 gene, partial cds                | 2929.3765 |
| 1010 | S80050_at_NA_illumina          | UDP-N-acetylglucosamine: alpha-6-D-       | 2929.8025 |
| 1011 | M27161_at_GI_27886641-A        | CD8A CD8 antigen, alpha polypeptide       | 2930.1428 |
| 1012 | M97496_at_GI_38176148-S        | GUCA2 Guanylate cyclase activator 2       | 2932.2078 |
| 1013 | RC_AA482499_at_NA_illumina     | TGFB inducible early growth response 2    | 2932.3088 |
| 1014 | D37931_at_GI_37577171-A        | RNS4 Ribonuclease 4 (2',5'-               | 2932.389  |
| 1015 | L13972_at_NA_illumina          | SIAT4A Sialyltransferase 4A (beta-        | 2932.5505 |
| 1016 | AA082926_at_GI_22035678-A      | EST: zn07f11.r1 Stratagene hNT neuron     | 2933.044  |
| 1017 | HG4557-HT4962_r_at_NA_illumina | Small Nuclear Ribonucleoprotein U1,       | 2933.0486 |
| 1018 | RC_AA496876_at_GI_31657143-A   | Homo sapiens putative oncogene protein    | 2933.0898 |
| 1019 | U90904_at_GI_42476171-S        | Clone 23773 mRNA sequence                 | 2933.3938 |
| 1020 | X59303_s_at_NA_illumina        | VALYL-TRNA SYNTHETASE                     | 2933.5894 |



|      |                                |                                             |           |
|------|--------------------------------|---------------------------------------------|-----------|
| 1021 | X70394_at_GI_6005965-S         | OZF mRNA                                    | 2934.59   |
| 1022 | U15172_at_GI_7524347-A         | Nip1 (NIP1) mRNA                            | 2934.7092 |
| 1023 | M22898_at_GI_8400737-S         | TP53 Tumor protein p53 (Li-Fraumeni         | 2935.462  |
| 1024 | D31766_at_GI_41281953-S        | PUTATIVE GLUCOSAMINE-6-                     | 2936.5818 |
| 1025 | M29550_at_GI_11036639-S        | SERINE/THREONINE PROTEIN                    | 2937.4282 |
| 1026 | L24783_at_NA_illumina          | mRNA fragment                               | 2937.554  |
| 1027 | U23028_at_GI_33667022-S        | EIF2B Eukaryotic translation initiation     | 2937.578  |
| 1028 | U50327_s_at_GI_4506076-S       | Protein kinase C substrate 80K-H gene       | 2937.5896 |
| 1029 | D63880_at_GI_41281520-S        | KIAA0159 gene                               | 2938.751  |
| 1030 | U51269_at_GI_4502246-S         | Armadillo repeat protein mRNA               | 2938.7998 |
| 1031 | HG1400-HT1400_s_at_NA_illumina | Carboxyl Methyltransferase, Aspartate, Alt. | 2938.9478 |
| 1032 | X63692_at_GI_4503350-S         | DNMT DNA methyltransferase                  | 2939.2717 |
| 1033 | S77812_at_GI_32306519-S        | FLT1 Fms-related tyrosine kinase 1          | 2939.6926 |
| 1034 | M31899_at_GI_4557562-S         | ERCC3 DNA repair helicase ERCC3             | 2939.7053 |
| 1035 | Z34918_at_GI_10092600-S        | Translation initiation factor eIF-4gamma    | 2940.684  |
| 1036 | U51241_at_GI_30581169-A        | CMKBR3 Chemokine (C-C) receptor 3           | 2940.6968 |
| 1037 | D42087_at_GI_7661921-S         | KIAA0118 gene, partial cds                  | 2940.7034 |
| 1038 | M91585_at_GI_4757865-S         | Br140 mRNA                                  | 2941.0505 |
| 1039 | AA455706_at_NA_illumina        | EST: aa22d08.r1 NCI_CGAP_GCB1               | 2941.552  |
| 1040 | U63090_at_NA_illumina          | Gal beta-1,3 GalNAc alpha-2,3               | 2941.6306 |
| 1041 | U18062_at_GI_14717406-S        | TFIID subunit TAFII55 (TAFII55) mRNA        | 2941.9116 |
| 1042 | X65857_at_GI_4505516-S         | HGMP07E gene for olfactory receptor         | 2943.1992 |
| 1043 | U42412_at_GI_42560238-S        | 5'-AMP-activated protein kinase, gamma-1    | 2943.6738 |
| 1044 | X72879_at_NA_illumina          | 14A2AK DNA sequence                         | 2943.8625 |
| 1045 | L14565_at_GI_21264344-S        | PERIPHERIN                                  | 2943.8813 |
| 1046 | U57094_at_GI_34485710-A        | Small GTP-binding protein mRNA              | 2943.8857 |
| 1047 | M76482_at_GI_4503404-S         | DSG3 Desmoglein 3 (pemphigus vulgaris       | 2943.9097 |
| 1048 | U63336_at_GI_13376877-S        | MHC Class I region proline rich protein     | 2943.9211 |
| 1049 | AF015913_at_GI_20070219-S      | SKB1Hs mRNA                                 | 2944.137  |
| 1050 | D63135_at_NA_illumina          | ETS-like 30 kDa protein                     | 2944.7085 |
| 1051 | M34458_rna1_s_at_GI_27436949-S | Lamin B gene extracted from Human lamin     | 2944.892  |
| 1052 | M97016_s_at_2_NA_illumina      | Bone morphogenetic protein 8 (osteogenic    | 2945.0479 |
| 1053 | M97016_s_at_GI_32441272-S      | BMP8 Bone morphogenetic protein 8           | 2945.0479 |
| 1054 | U72935_cds3_s_at_NA_illumina   | ATRX gene (putative DNA dependent           | 2945.247  |
| 1055 | U72209_at_GI_20544184-S        | YY1-associated factor 2 (YAF2) mRNA         | 2945.5686 |
| 1056 | M95929_at_NA_illumina          | Homeobox protein (PHOX1) mRNA, 3' end       | 2947.3135 |
| 1057 | L26494_at_GI_27545318-S        | POU3F1 POU domain, class 3,                 | 2948.0076 |
| 1058 | M68895_rna1_at_GI_11024646-S   | Alcohol dehydrogenase 6 gene                | 2948.4573 |
| 1059 | M64231_rna1_at_NA_illumina     | Spermidine synthase gene                    | 2948.6565 |
| 1060 | U31814_at_GI_4557640-S         | Transcriptional regulator homolog RPD3      | 2948.7166 |
| 1061 | D80004_at_GI_44955925-S        | KIAA0182 gene, partial cds                  | 2948.9448 |
| 1062 | L28997_at_GI_33946322-S        | ARL1 ADP-ribosylation factor like 1         | 2950.964  |
| 1063 | X85545_at_GI_4826947-S         | Protein kinase, PKX1                        | 2951.1526 |

|      |                                |                                            |           |
|------|--------------------------------|--------------------------------------------|-----------|
| 1064 | L00137_cds1_at_GI_30581161-S   | GHRF gene (growth hormone releasing        | 2951.2217 |
| 1065 | M73780_at_GI_4504778-S         | ITGB8 Integrin, beta 8                     | 2951.3396 |
| 1066 | U82310_at_NA_illumina          | Unknown protein mRNA, partial cds          | 2951.4832 |
| 1067 | HG2325-HT2421_at_NA_illumina   | Retinoic Acid Receptor, Gamma 2            | 2951.6733 |
| 1068 | M86917_at_GI_34485728-S        | OSBP Oxysterol binding protein             | 2951.9026 |
| 1069 | Z47087_at_GI_25777712-A        | TCEB1L Transcription elongation factor B   | 2951.9592 |
| 1070 | M58026_at_GI_36031099-S        | CALMODULIN-RELATED PROTEIN NB-1            | 2952.4214 |
| 1071 | M81829_at_GI_33946330-S        | Somatostatin receptor isoform 1 gene       | 2952.612  |
| 1072 | U44772_at_GI_4506030-S         | Palmitoyl protein thioesterase mRNA        | 2952.6519 |
| 1073 | L25876_at_GI_17981703-S        | Protein tyrosine phosphatase (CIP2)mRNA    | 2952.682  |
| 1074 | D28473_s_at_GI_7770073-A       | IARS Isoleucine-tRNA synthetase            | 2953.261  |
| 1075 | D87467_at_GI_41281402-S        | KIAA0277 gene                              | 2953.7886 |
| 1076 | Z31690_s_at_NA_illumina        | LIPA Lipase A, lysosomal acid, cholesterol | 2953.9846 |
| 1077 | RC_AA447408_at_NA_illumina     | EST: zw93b12.s1 Soares total fetus         | 2954.0427 |
| 1078 | M81758_at_GI_40255315-S        | SODIUM CHANNEL PROTEIN,                    | 2954.0435 |
| 1079 | U19251_s_at_GI_9257230-S       | SMA5 mRNA                                  | 2954.3274 |
| 1080 | M74524_at_GI_32967275-A        | UBE2A Ubiquitin-conjugating enzyme E2A     | 2954.9937 |
| 1081 | M76424_at_GI_4885100-S         | Carbonic anhydrase VII (CA VII) gene       | 2955.017  |
| 1082 | M74089_at_GI_20270310-S        | TB1 gene mRNA, 3' end                      | 2955.2263 |
| 1083 | L41870_at_GI_4506434-S         | RB1 Retinoblastoma 1 (including            | 2955.7244 |
| 1084 | D42138_at_GI_22538447-S        | PIG-B                                      | 2956.5342 |
| 1085 | U11875_s_at_NA_illumina        | Interleukin-8 receptor type B (IL8RB)      | 2956.8586 |
| 1086 | U38175_at_GI_38201713-S        | HuR RNA binding protein (HuR) mRNA         | 2957.525  |
| 1087 | HG2992-HT5186_at_NA_illumina   | Beta-Hexosaminidase, Alpha Polypeptide,    | 2957.6304 |
| 1088 | X81198_at_GI_21626463-S        | COATOMER DELTA SUBUNIT                     | 2958.0225 |
| 1089 | U82671_cds2_at_2_NA_illumina   | H.sapiens mRNA for ZNF185 gene::Homo       | 2958.087  |
| 1090 | U82671_cds2_at_GI_6005971-S    | HSP1-A gene extracted from Homo            | 2958.087  |
| 1091 | R68846_at_NA_illumina          | EST: yi37a05.r1 Homo sapiens cDNA          | 2958.6326 |
| 1092 | M37712_at_GI_37540666-S        | CDC2L1 Cell division cycle 2-like 1        | 2958.7004 |
| 1093 | M80783_at_GI_26051238-S        | B12 protein mRNA                           | 2959.4717 |
| 1094 | J02986_cds1_at_GI_4503700-S    | FGF4 gene (transforming protein)           | 2959.5076 |
| 1095 | AF003743_at_GI_32479522-A      | Delayed rectifier potassium channel        | 2959.5808 |
| 1096 | X96381_rna1_at_GI_4758315-S    | Erm gene, exon 2,3,4,5 (and joined CDS)    | 2960.1763 |
| 1097 | HG2987-HT3136_s_at_NA_illumina | Vasoactive Intestinal Peptide              | 2960.3342 |
| 1098 | U09848_at_NA_illumina          | ZNF139 Zinc finger protein 139 (clone pHZ- | 2960.64   |
| 1099 | L42373_at_GI_30795205-S        | Protein phosphatase 2A B56-alpha mRNA      | 2960.9731 |
| 1100 | U33052_s_at_NA_illumina        | Lipid-activated, protein kinase PRK2       | 2961.0671 |
| 1101 | U65579_at_GI_4505370-S         | Mitochondrial NADH dehydrogenase-          | 2961.5596 |
| 1102 | X79780_at_GI_4758985-S         | YPT3 mRNA                                  | 2961.7185 |
| 1103 | U81984_at_GI_41327154-S        | Endothelial PAS domain protein 1 (EPAS1)   | 2961.7332 |
| 1104 | M88338_at_GI_34452716-A        | SERUM PROTEIN MSE55                        | 2961.836  |
| 1105 | U34044_at_GI_45269154-S        | Selenium donor protein (seld) mRNA         | 2963.4827 |
| 1106 | HG1071-HT1071_at_NA_illumina   | Bone Morphogenetic Protein 3               | 2963.7688 |

|      |                                |                                             |           |
|------|--------------------------------|---------------------------------------------|-----------|
| 1107 | U79291_at_NA_illumina          | Clone 23721 mRNA sequence                   | 2964.6587 |
| 1108 | HG4704-HT5146_at_NA_illumina   | Glial Growth Factor 2                       | 2965.9885 |
| 1109 | L37199_at_NA_illumina          | (clone cD24-1) Huntington's disease         | 2966.5571 |
| 1110 | X69978_at_GI_4503600-S         | ERCC5 DNA excision repair protein           | 2966.6663 |
| 1111 | L12723_at_GI_38327040-A        | HSPA4 Heat shock 70kD protein 4             | 2966.8713 |
| 1112 | L35035_at_GI_21389336-S        | Ribose 5-phosphate isomerase (RPI)          | 2967.0532 |
| 1113 | U12622_at_GI_13518027-S        | Beaded intermediate filament protein        | 2968.1067 |
| 1114 | Z19751_at_NA_illumina          | H. sapiens putatively transcribed partial   | 2969.523  |
| 1115 | AA287423_at_NA_illumina        | EST: zs52b01.r1 NCI_CGAP_GCB1 Homo          | 2970.4214 |
| 1116 | J04088_at_GI_19913405-S        | TOP2A Topoisomerase (DNA) II alpha          | 2971.6064 |
| 1117 | X52638_at_GI_4505744-S         | PFKFB1 6-phosphofructo-2-                   | 2971.6064 |
| 1118 | R78444_at_GI_13702710-S        | Protein phosphatase 2 (formerly 2A),        | 2971.7075 |
| 1119 | J03071_cds3_f_at_GI_20819972-A | Chorionic somatomammotropin CS-1 gene       | 2971.768  |
| 1120 | X16105_at_NA_illumina          | RD Radin blood group                        | 2971.8193 |
| 1121 | W03361_at_GI_40254881-S        | EST: za06g11.r1 Soares melanocyte           | 2972.8333 |
| 1122 | X65463_at_NA_illumina          | RETINOIC ACID RECEPTOR RXR-BETA             | 2972.9358 |
| 1123 | X75042_at_GI_4506472-S         | REL V-rel avian reticuloendotheliosis viral | 2973.4243 |
| 1124 | M30269_at_NA_illumina          | NID Nidogen (enactin)                       | 2973.6165 |
| 1125 | X99479_f_at_GI_31982877-S      | Natural killer cell receptor (KIR) mRNA     | 2974.1707 |
| 1126 | Z22551_at_NA_illumina          | Kinectin gene                               | 2974.6643 |
| 1127 | Z17227_at_GI_24430214-S        | CRFB4 Cytokine receptor family II,          | 2974.776  |
| 1128 | D63879_at_GI_21327689-S        | KIAA0156 gene                               | 2974.9324 |
| 1129 | X99584_at_NA_illumina          | SMT3A protein                               | 2975.2573 |
| 1130 | Z86000_at_NA_illumina          | DNA sequence from clone RP1-151B14 on       | 2975.3613 |
| 1131 | HG4677-HT5102_s_at_NA_illumina | Oncogene Ret/Ptc2, Fusion Activated         | 2975.394  |
| 1132 | U66559_at_GI_29029631-S        | NPM1 Nucleophosmin (nucleolar               | 2975.8074 |
| 1133 | U57057_at-2_NA_illumina        | WD repeat domain 2                          | 2976.3994 |
| 1134 | U57057_at_GI_34335234-A        | WD protein IR10 mRNA                        | 2976.3994 |
| 1135 | N30458_at_NA_illumina          | EST: yx48b06.r1 Homo sapiens cDNA           | 2976.754  |
| 1136 | AA446990_at_NA_illumina        | EST: zw90b07.r1 Soares total fetus          | 2976.7544 |
| 1137 | S57132_s_at_NA_illumina        | COL16A1 Alpha-1 type XVI collagen           | 2976.8394 |
| 1138 | D43949_at_GI_24307982-S        | KIAA0082 gene, partial cds                  | 2977.7546 |
| 1139 | L27706_at_GI_22095341-S        | CCT6 Chaperonin containing T-complex        | 2978.3616 |
| 1140 | M59829_at_GI_27436928-S        | MHC class III HSP70-HOM gene (HLA)          | 2978.8257 |
| 1141 | U62389_at_GI_28178824-S        | Putative cytosolic NADP-dependent           | 2978.8726 |
| 1142 | U39412_at_GI_4505328-S         | Platelet alpha SNAP mRNA                    | 2978.9573 |
| 1143 | U96115_at_GI_27735138-S        | WW domain-containing protein WWP3           | 2979.3867 |
| 1144 | RC_AA069425_at_NA_illumina     | EST: zf73g10.s1 Soares pineal gland         | 2979.5989 |
| 1145 | AB003698_at_GI_11038647-S      | Cdc7-related kinase                         | 2979.9568 |
| 1146 | U80669_at_GI_19923351-S        | Androgen regulated homeobox protein         | 2980.1714 |
| 1147 | M29610_at_GI_38373678-A        | GYPE Glycophorin E                          | 2980.5947 |
| 1148 | X16665_at_GI_24497527-S        | HOXB2 Homeo box B2                          | 2981.2012 |
| 1149 | U50078_at_GI_4557025-S         | Guanine nucleotide exchange factor p532     | 2981.2751 |

|      |                              |                                             |           |
|------|------------------------------|---------------------------------------------|-----------|
| 1150 | HG4243-HT4513_at_NA_illumina | Zinc Finger Protein Znf155                  | 2981.4824 |
| 1151 | L76702_at_GI_31083287-A      | Protein phosphatase 2A 74 kDa regulatory    | 2981.677  |
| 1152 | L78440_at_GI_21618332-S      | STAT4 Signal transducer and activator of    | 2981.9343 |
| 1153 | U88666_at_GI_33188448-I      | Serine kinase SRPK2 mRNA                    | 2982.606  |
| 1154 | M31211_s_at_GI_17986280-S    | MYL1 Myosin light chain (alkali)            | 2983.671  |
| 1155 | S66431_at_GI_4826967-S       | RBP2                                        | 2983.7568 |
| 1156 | X83368_at_GI_21237724-S      | PIK3CG Phosphatidylinositol 3-kinase,       | 2984.026  |
| 1157 | Y13620_at_GI_4757845-S       | BCL9 gene                                   | 2984.208  |
| 1158 | M55131_at_NA_illumina        | CFTR Cystic fibrosis conductance            | 2984.3132 |
| 1159 | HG3286-HT3463_at_NA_illumina | Crystallin, Alpha A                         | 2984.3406 |
| 1160 | Z34897_at_GI_13435403-S      | HRH1 Histamine receptor H1                  | 2984.572  |
| 1161 | L35263_at_NA_illumina        | CSaids binding protein (CSBP1) mRNA         | 2984.6692 |
| 1162 | D38524_at_GI_20149601-S      | NT5 5' nucleotidase (CD73)                  | 2984.733  |
| 1163 | L11702_at_NA_illumina        | Phospholipase D mRNA                        | 2985.2927 |
| 1164 | U73167_cds5_at_GI_21361365-S | SM15 gene (human interferon-related         | 2985.4724 |
| 1165 | M13232_s_at_GI_10518502-A    | Factor VII serine protease precursor        | 2985.8303 |
| 1166 | U90919_at_GI_10863994-S      | Clones 23667 and 23775 zinc finger          | 2985.9634 |
| 1167 | U17886_at_GI_9257241-S       | SDH1 Succinate dehydrogenase, iron          | 2986.2961 |
| 1168 | N76780_at_NA_illumina        | Yv45e08.r1 Soares fetal liver spleen        | 2986.404  |
| 1169 | M60527_at_GI_4503268-S       | DCK Deoxycytidine kinase                    | 2986.431  |
| 1170 | M18391_s_at_GI_32967308-S    | TYROSINE-PROTEIN KINASE                     | 2986.7    |
| 1171 | AA057555_at_GI_39812204-S    | EST: zf62a11.r1 Soares retina N2b4HR        | 2986.8564 |
| 1172 | M29610_s_at_NA_illumina      | GYPE Glycophorin E                          | 2987.0552 |
| 1173 | X75546_at_NA_illumina        | Fibromodulin                                | 2987.2405 |
| 1174 | D86549_at_NA_illumina        | P97 homologous protein, partial cds         | 2987.2993 |
| 1175 | U06681_at_NA_illumina        | Clone CCA12 mRNA containing CCA             | 2987.345  |
| 1176 | AA165672_at_NA_illumina      | EST: zo80b05.r1 Stratagene ovarian          | 2987.5427 |
| 1177 | M57464_s_at_GI_21536313-A    | RET Ret proto-oncogene (multiple            | 2988.136  |
| 1178 | RC_AA452913_at_NA_illumina   | KIAA0331 gene product                       | 2988.1626 |
| 1179 | AF009301_at_NA_illumina      | TEB4 protein mRNA                           | 2988.3667 |
| 1180 | X63417_at_NA_illumina        | IrlB mRNA                                   | 2988.5867 |
| 1181 | L04731_at_GI_5174568-S       | Translocation T(4:11) of ALL-1 gene to      | 2989.3564 |
| 1182 | Z84483_at_GI_24497613-A      | DNA sequence from PAC 46H23, BRCA2          | 2989.734  |
| 1183 | AA251713_at_NA_illumina      | Zs04c09.r1 NCI_CGAP_GCB1 Homo               | 2990.0828 |
| 1184 | X03656_rna1_at_GI_27437048-A | G-CSF protein gene extracted from Human     | 2990.8474 |
| 1185 | RC_AA236825_at_NA_illumina   | EST: zr99f08.s1 NCI_CGAP_GCB1 Homo          | 2991.6233 |
| 1186 | U60519_at_GI_14916487-A      | Apoptotic cysteine protease Mch4 (Mch4)     | 2991.8145 |
| 1187 | U89336_cds6_at_NA_illumina   | Unknown gene extracted from Human HLA       | 2992.1082 |
| 1188 | W28968_at_NA_illumina        | EST: 54d6 Human retina cDNA randomly        | 2992.409  |
| 1189 | Y08991_at_GI_23943911-S      | Adaptor protein p150                        | 2992.787  |
| 1190 | S83362_s_at_GI_6042197-S     | Differentiation-stimulating factor/leukemia | 2993.0366 |
| 1191 | Y09443_at_GI_4501992-S       | Alkyl-dihydroxyacetonephosphate             | 2993.0706 |
| 1192 | X74330_at_GI_41349493-S      | PRIM1 DNA primase polypeptide 1 (49kD)      | 2993.229  |

|      |                                |                                           |           |
|------|--------------------------------|-------------------------------------------|-----------|
| 1193 | HG4234-HT4504_at_NA_illumina   | Methylenetetrahydrofolate Reductase       | 2993.233  |
| 1194 | X04201_at_GI_22748618-A        | Skeletal muscle 1.3 kb mRNA for           | 2993.6333 |
| 1195 | M94065_at_GI_45006950-S        | DHODH Dihydroorotate dehydrogenase        | 2993.6924 |
| 1196 | Z18956_at_NA_illumina          | SLC6A6 Solute carrier family 6            | 2993.8154 |
| 1197 | D38553_at_GI_25121986-S        | KIAA0074 gene, partial cds                | 2996.0044 |
| 1198 | RC_AA256380_at_NA_illumina     | EST: zr80h01.s1 Soares NhHMPu S1          | 2996.628  |
| 1199 | S80310_s_at_NA_illumina        | Acidic epididymal glycoprotein-like 1     | 2996.6401 |
| 1200 | X58528_s_at_NA_illumina        | PXMP1 Peroxisomal membrane protein 1      | 2996.7063 |
| 1201 | M98447_rna1_at_GI_4507474-S    | Keratinocyte transglutaminase gene        | 2997.0056 |
| 1202 | HG3412-HT3593_s_at_NA_illumina | Blue Cone Photoreceptor Pigment           | 2997.4048 |
| 1203 | L18972_at_GI_19923177-S        | Anonymous gene                            | 2997.753  |
| 1204 | L18972_at-2_NA_illumina        | Gene from NF2/meningioma region of        | 2997.753  |
| 1205 | X79563_at_NA_illumina          | H.sapiens 8.2kDa differentiation factor   | 2998.2737 |
| 1206 | X85785_rna1_at_GI_42822886-S   | DARC gene                                 | 2998.5706 |
| 1207 | L40411_at_NA_illumina          | Thyroid receptor interactor (TRIP8) mRNA, | 2999.2588 |
| 1208 | L39059_at_GI_21536366-A        | Transcription factor SL1 mRNA             | 2999.9146 |
| 1209 | L00634_s_at_GI_4503770-S       | FNTA Farnesyltransferase, CAAX box,       | 3000.311  |
| 1210 | U31248_at_GI_4508006-S         | ZNF174 Zinc finger protein 174            | 3000.4812 |
| 1211 | U45976_at_GI_6005732-S         | Clathrin assembly protein lymphoid        | 3000.637  |
| 1212 | X97630_at_GI_9845486-A         | Serine/threonine protein kinase EMK       | 3001.5764 |
| 1213 | X69398_at_GI_38683837-S        | CD47 CD47 antigen (Rh-related antigen,    | 3002.4766 |
| 1214 | N32724_at_GI_5454079-S         | Homo sapiens Sox-like transcriptional     | 3003.3418 |
| 1215 | HG210-HT210_s_at_NA_illumina   | Galactokinase 2                           | 3003.5908 |
| 1216 | U06088_at_GI_9945384-S         | N-ACETYLGALACTOSAMINE-6-                  | 3004.7197 |
| 1217 | HG2841-HT2968_s_at_NA_illumina | Albumin, Alt. Splice 1                    | 3004.865  |
| 1218 | D49818_at_GI_19923257-S        | Fructose 6-phosphate,2-kinase/fructose    | 3004.938  |
| 1219 | U12471_cds1_at_GI_40317625-S   | Thrombospondin-p50 gene extracted from    | 3005.7534 |
| 1220 | L05187_at_GI_10835235-S        | Small proline-rich protein 1 (SPRR1A)     | 3006.0156 |
| 1221 | M34192_at_GI_6031167-S         | IVD Isovaleryl Coenzyme A                 | 3006.6548 |
| 1222 | D25538_at_GI_41327757-S        | KIAA0037 gene                             | 3006.6655 |
| 1223 | X53683_at_NA_illumina          | SCYA4 Small inducible cytokine A4         | 3007.2168 |
| 1224 | AA393139_at_GI_41393571-S      | EST: zt73c12.r1 Soares testis NHT Homo    | 3007.3047 |
| 1225 | U12767_at_NA_illumina          | Mitogen induced nuclear orphan receptor   | 3007.9905 |
| 1226 | W74106_at_NA_illumina          | EST: zd03e05.r1 Pancreatic Islet Homo     | 3008.044  |
| 1227 | HG172-HT3924_at_NA_illumina    | Spermidine/Spermine N1-                   | 3008.2725 |
| 1228 | RC_AA147626_at_NA_illumina     | EST: zl52d08.s1 Soares pregnant uterus    | 3008.5037 |
| 1229 | M74826_at_GI_4503874-S         | GAD2 Glutamate decarboxylase 2            | 3009.1548 |
| 1230 | U31120_rna1_at_GI_26787977-S   | Interleukin-13 (IL-13) precursor gene     | 3009.158  |
| 1231 | HG4755-HT5203_s_at_NA_illumina | Spinal Muscular Atrophy 4                 | 3009.3875 |
| 1232 | HG4185-HT4455_at_NA_illumina   | Estrogen Sulfotransferase, Ste            | 3009.4941 |
| 1233 | RC_AA279827_at_NA_illumina     | EST: zs92f08.s1 NCI_CGAP_GCB1 Homo        | 3009.5122 |
| 1234 | S73840_at_GI_42476189-S        | Type IIx myosin heavy chain {3' region}   | 3009.7085 |
| 1235 | U13045_at_GI_32483407-A        | GABPB2 GA-binding protein transcription   | 3010.1104 |

|      |                                |                                           |           |
|------|--------------------------------|-------------------------------------------|-----------|
| 1236 | V00574_s_at_NA_illumina        | (genomic clones lambda-[SK2-T2,           | 3010.161  |
| 1237 | X06318_at_NA_illumina          | PRKCB1 Protein kinase C, beta 1           | 3010.6099 |
| 1238 | S76473_s_at_GI_21361305-S      | TrkB [human, brain, mRNA, 3194 nt]        | 3011.6023 |
| 1239 | U63743_at_GI_13699832-S        | Mitotic centromere-associated kinesin     | 3012.0164 |
| 1240 | L40394_at_GI_31742475-S        | (clone S194) mRNA, 3' end of cds          | 3012.097  |
| 1241 | R74238_at_NA_illumina          | EST: yj99f10.r1 Homo sapiens cDNA clone   | 3012.3506 |
| 1242 | U37547_at_GI_41349435-S        | IAP homolog B (MIHB) mRNA                 | 3012.6013 |
| 1243 | X68487_at_GI_22907046-S        | ADORA2B Adenosine A2b receptor            | 3012.6367 |
| 1244 | M60165_cds1_at_GI_41281684-I   | HLA-DQB1 gene extracted from Human        | 3013.026  |
| 1245 | HG831-HT831_at_NA_illumina     | Potassium Channel (Gb:L02752)             | 3013.556  |
| 1246 | X59841_at_GI_24475894-S        | PRE-B-CELL LEUKEMIA                       | 3013.7678 |
| 1247 | X94754_at_GI_14043021-S        | Yeast methionyl-tRNA synthetase           | 3014.004  |
| 1248 | W35112_at_NA_illumina          | P21 (CDKN1A)-activated kinase 2           | 3014.3254 |
| 1249 | AB000114_at-2_NA_illumina      | Osteomodulin                              | 3014.5896 |
| 1250 | AB000114_at_GI_4826875-S       | Osteomodulin                              | 3014.5896 |
| 1251 | HG3548-HT3749_at_NA_illumina   | Ccaat Displacement Protein, Cut Homolog,  | 3014.781  |
| 1252 | U19765_at_GI_4827070-S         | CELLULAR NUCLEIC ACID BINDING             | 3014.7861 |
| 1253 | AA223074_at_GI_13129135-S      | EST: PMY0311 KG1-a Lambda Zap             | 3014.8584 |
| 1254 | M13903_at_GI_44890058-S        | Involucrin gene, exon 2                   | 3015.1968 |
| 1255 | X54941_at_GI_4502856-S         | CKS1 CDC28 protein kinase 1               | 3015.2842 |
| 1256 | U68233_at_GI_4826979-S         | Farnesol receptor HRR-1 (HRR-1) mRNA      | 3015.6597 |
| 1257 | W27299_at_NA_illumina          | Homo sapiens clone 23685 mRNA             | 3015.8306 |
| 1258 | AA020941_at_GI_21265030-S      | EST: ze64c11.r1 Soares retina N2b4HR      | 3015.8638 |
| 1259 | U83461_at_GI_4507016-S         | Putative copper uptake protein (hCTR2)    | 3016.0542 |
| 1260 | AC002486_at_GI_36413606-S      | BAC clone RG367O17 from 7p15-p21,         | 3016.7625 |
| 1261 | L05779_at_GI_34222221-S        | EPHX2 Epoxide hydrolase 2, cytoplasmic    | 3017.0798 |
| 1262 | U15009_at_GI_34328935-S        | SnRNP core protein Sm D3 mRNA             | 3017.221  |
| 1263 | D28364_at_NA_illumina          | Annexin II, 5'UTR (sequence from the      | 3017.2964 |
| 1264 | X67098_at_NA_illumina          | RTS beta protein                          | 3018.116  |
| 1265 | HG2441-HT2537_s_at_NA_illumina | Retinoblastoma Protein, Mutated           | 3018.9988 |
| 1266 | RC_AA034014_at_NA_illumina     | EST: zi06c11.s1 Soares fetal liver spleen | 3019.565  |
| 1267 | HG3231-HT3408_at_NA_illumina   | Protease Receptor-1, Effector Cell        | 3019.7163 |
| 1268 | D43636_at_GI_31442407-S        | KIAA0096 gene, partial cds                | 3019.8237 |
| 1269 | U15932_at_GI_12707565-S        | Protein tyrosine phosphatase mRNA         | 3020.136  |
| 1270 | W26531_at_NA_illumina          | Glutamate-ammonia ligase (glutamine       | 3020.4631 |
| 1271 | S79873_s_at_NA_illumina        | LAMP2 Lysosome-associated membrane        | 3020.6772 |
| 1272 | M60974_s_at_GI_9790904-S       | DDIT1 DNA-damage-inducible transcript 1   | 3020.8823 |
| 1273 | HG3227-HT3404_at_NA_illumina   | Guanine Nucleotide-Binding Protein Hsr1   | 3021.032  |
| 1274 | HG3426-HT3610_s_at_NA_illumina | Zinc Finger Protein Hzf-16, Kruppel-Like, | 3021.1978 |
| 1275 | X99720_rna1_at_GI_40807446-S   | TPRC gene                                 | 3021.3994 |
| 1276 | U22377_at_GI_6912631-S         | Zn-15 related zinc finger protein (rlf)   | 3021.4111 |
| 1277 | RC_AA400607_s_at_NA_illumina   | Homo sapiens mRNA for AMP-activated       | 3021.9385 |
| 1278 | U80457_at_NA_illumina          | Transcription factor SIM2 long form mRNA  | 3022.171  |

|      |                              |                                               |           |
|------|------------------------------|-----------------------------------------------|-----------|
| 1279 | X16396_at_GI_13699869-S      | MTHFD NAD-dependent methylene                 | 3022.266  |
| 1280 | HG2442-HT2538_at_NA_illumina | Tropomyosin, Alpha, Muscle, Alt. Splice 2,    | 3022.6653 |
| 1281 | M37190_at_GI_35493905-S      | Ras inhibitor mRNA, 3' end                    | 3023.392  |
| 1282 | J04101_at_GI_41393580-S      | Erythroblastosis virus oncogene homolog       | 3023.5388 |
| 1283 | X64044_at_GI_6005925-S       | SPLICING FACTOR U2AF 65 KD                    | 3023.6775 |
| 1284 | D63391_at_GI_20149519-S      | Platelet activating factor acetylhydrolase IB | 3024.1045 |
| 1285 | V01515_cds1_at_NA_illumina   | Unnamed protein product gene extracted        | 3024.2246 |
| 1286 | X79066_at_GI_15812179-S      | ERF-1 mRNA 5' end                             | 3024.7708 |
| 1287 | U62433_at_GI_29570783-S      | CHRNA4 Cholinergic receptor, nicotinic,       | 3024.8523 |
| 1288 | D29641_at_NA_illumina        | HYPOTHETICAL MYELOID CELL LINE                | 3025.492  |
| 1289 | X54993_s_at_GI_20544178-S    | TRANSCRIPTION INITIATION FACTOR               | 3025.6204 |
| 1290 | X55037_s_at_GI_4503928-S     | GATA3 GATA-binding protein 3                  | 3025.6367 |
| 1291 | AA293634_at_NA_illumina      | Casein kinase 1, alpha 1                      | 3025.7358 |
| 1292 | F07806_at_NA_illumina        | EST: H. sapiens partial cDNA sequence;        | 3025.7507 |
| 1293 | L35253_s_at_GI_20986513-A    | CSaids binding protein (CSBP1) mRNA           | 3026.155  |
| 1294 | AA431847_at_NA_illumina      | EST: zw79h07.r1 Soares testis NHT Homo        | 3026.856  |
| 1295 | L17128_at_GI_21361162-S      | GGCX Gamma-glutamyl carboxylase               | 3027.0266 |
| 1296 | X54816_at_GI_31541901-S      | AMBP Alpha-1-microglobulin/bikunin            | 3027.0498 |
| 1297 | X67594_at_GI_27477128-S      | MC1R Melanocortin 1 receptor (alpha           | 3027.075  |
| 1298 | M28983_at_GI_27894329-S      | IL1A Interleukin 1, alpha                     | 3027.104  |
| 1299 | S75989_at_GI_7657586-S       | Gamma-aminobutyric acid transporter type      | 3027.411  |
| 1300 | U47414_at_GI_4757935-S       | Cyclin G2 mRNA                                | 3027.7498 |
| 1301 | AA393197_at_NA_illumina      | Zinc finger protein 151 (pHZ-67)              | 3028.7878 |
| 1302 | RC_AA521097_at_NA_illumina   | EST: aa72d11.s1 NCI_CGAP_GCB1                 | 3028.9207 |
| 1303 | U48296_at_GI_17986281-S      | Protein tyrosine phosphatase PTPCAAX1         | 3029.3052 |
| 1304 | U18321_at_GI_16905527-A      | LAMR1 Laminin receptor (2H5 epitope)          | 3029.3936 |
| 1305 | U59058_s_at_NA_illumina      | Beta-A3/A1 crystallin (CYRBA3/A1)             | 3029.5166 |
| 1306 | D43638_at_NA_illumina        | ETO mRNA                                      | 3029.5342 |
| 1307 | HG998-HT998_s_at_NA_illumina | Sulfotransferase, Phenol-Preferring           | 3029.6797 |
| 1308 | L20861_at_GI_17402917-S      | WNT5A Wntless-type MMTV integration           | 3030.3506 |
| 1309 | S81893_at_NA_illumina        | MES13/15=extracellular matrix induced         | 3030.4517 |
| 1310 | HG2709-HT2805_at_NA_illumina | Serine/Threonine Kinase (Gb:Z25431)           | 3030.5266 |
| 1311 | RC_AA019342_at_NA_illumina   | EST: ze57e05.s1 Soares retina N2b4HR          | 3030.798  |
| 1312 | U26914_at_GI_35038161-S      | Ras-responsive element binding protein        | 3031.4695 |
| 1313 | M93283_at_GI_5453919-S       | Pancreatic lipase related protein 1           | 3031.5718 |
| 1314 | U69263_at_GI_13518038-A      | Matrilin-2 precursor mRNA, partial cds        | 3032.3843 |
| 1315 | X92972_at_GI_20127429-S      | Protein phosphatase 6                         | 3032.8723 |
| 1316 | L32976_at-2_NA_illumina      | Mixed lineage kinase 3                        | 3033.3093 |
| 1317 | L32976_at_GI_21735553-S      | Protein kinase (MLK-3) mRNA                   | 3033.3093 |
| 1318 | D80000_at_GI_30581134-S      | KIAA0178 gene, partial cds                    | 3033.4824 |
| 1319 | M93425_at_GI_18375651-S      | PTPN12 Protein tyrosine phosphatase,          | 3033.7737 |
| 1320 | L32164_at_GI_8924263-S       | Zinc finger protein mRNA, 3' end              | 3033.9092 |
| 1321 | W27470_at_NA_illumina        | ATPase, H+ transporting, lysosomal            | 3034.0464 |

|      |                                |                                               |           |
|------|--------------------------------|-----------------------------------------------|-----------|
| 1322 | X94453_at_NA_illumina          | PYCS Pyrroline-5-carboxylate synthetase       | 3034.9785 |
| 1323 | RC_AA001611_at_GI_20070334-S   | EST: zh82e04.s1 Soares fetal liver spleen     | 3035.1917 |
| 1324 | D00591_at_NA_illumina          | CHC1 Chromosome condensation 1                | 3035.5776 |
| 1325 | RC_AA278824_at_NA_illumina     | EST: zs78f04.s1 NCI_CGAP_GCB1 Homo            | 3035.6345 |
| 1326 | HG4757-HT5207_s_at_NA_illumina | Oncogene Mll-Af4, Fusion Activated            | 3036.2957 |
| 1327 | AA227592_at_NA_illumina        | Human PtdIns 4-kinase (PI4Kb) mRNA,           | 3037.3909 |
| 1328 | RC_AA465468_at_NA_illumina     | EST: aa22g04.s1 NCI_CGAP_GCB1                 | 3037.5935 |
| 1329 | U11732_at_GI_41872473-S        | ETV6 Ets variant gene 6 (TEL oncogene)        | 3038.2568 |
| 1330 | L13923_at_GI_24430140-S        | FBN1 Fibrillin 1 (Marfan syndrome)            | 3038.6748 |
| 1331 | X17360_rna1_at_NA_illumina     | HOX 5.1 gene for HOX 5.1 protein              | 3038.8635 |
| 1332 | U32659_at_GI_27477085-S        | CTLA8 Cytotoxic T lymphocyte-associated       | 3039.2122 |
| 1333 | RC_AA435542_at_NA_illumina     | EST: zt85f04.s1 Soares testis NHT Homo        | 3039.3105 |
| 1334 | L22075_at_GI_31343475-S        | Guanine nucleotide regulatory protein         | 3039.8882 |
| 1335 | W01881_at_NA_illumina          | Za35g05.r1 Soares fetal liver spleen          | 3040.29   |
| 1336 | S83513_s_at_GI_10947062-S      | ADCYAP1 Adenylate cyclase activating          | 3040.301  |
| 1337 | L40992_at_GI_10863884-S        | (clone PEBP2aA1) core-binding factor,         | 3040.963  |
| 1338 | HG2036-HT2090_at_NA_illumina   | Stimulatory Gdp/Gtp Exchange Protein For      | 3041.1199 |
| 1339 | U28694_s_at_NA_illumina        | Chemokine (C-C motif) receptor 3              | 3041.1355 |
| 1340 | H51071_at_NA_illumina          | EST: yp84h12.r1 Homo sapiens cDNA             | 3041.2458 |
| 1341 | D87449_at_GI_14028874-S        | KIAA0260 gene, partial cds                    | 3041.407  |
| 1342 | W56214_at_NA_illumina          | SudD (suppressor of bimD6, Aspergillus        | 3041.8132 |
| 1343 | HG4120-HT4392_s_at_NA_illumina | Protein Kinase Pitslre, Alpha, Alt. Splice 2- | 3041.846  |
| 1344 | D10656_at_GI_41327709-A        | CRK V-crk avian sarcoma virus CT10            | 3041.888  |
| 1345 | X96586_at_GI_31543296-S        | FAN protein                                   | 3042.856  |
| 1346 | U67932_s_at_NA_illumina        | CAMP phosphodiesterase mRNA, 3' end           | 3042.8662 |
| 1347 | Z72499_at_GI_4507856-S         | Herpesvirus associated ubiquitin-specific     | 3042.9348 |
| 1348 | D17427_at_GI_13435367-A        | DSC3 Desmocollin 3                            | 3043.0913 |
| 1349 | U96781_cds1_at_GI_27886528-A   | ATP2A1 gene (Ca2+ ATPase of fast-twitch       | 3043.5996 |
| 1350 | Z35278_at_GI_4757917-S         | PEBP2aC1 acute myeloid leukaemia              | 3044.5608 |
| 1351 | U48730_at_NA_illumina          | Transcription factor Stat5b (stat5b) mRNA     | 3045.1147 |
| 1352 | AA056319_at_NA_illumina        | Protein phosphatase 2, regulatory subunit     | 3045.2666 |
| 1353 | Z68129_cds1_at_GI_28178837-A   | H-IDH gamma gene (NAD(H)-specific             | 3045.5916 |
| 1354 | U65416_rna1_s_at_GI_26787987-S | MHC class I molecule (MICB) gene              | 3045.8445 |
| 1355 | L49173_f_at_NA_illumina        | OCP2 gene, partial cds                        | 3045.9329 |
| 1356 | D63478_at_NA_illumina          | KIAA0144 gene                                 | 3046.111  |
| 1357 | U10687_s_at_GI_29029623-S      | MAGE-4a antigen (MAGE4a) gene                 | 3046.1716 |
| 1358 | AA453707_at_NA_illumina        | EST: aa20e09.r1 Soares NhHMPu S1              | 3046.363  |
| 1359 | L28957_at_GI_31543384-S        | CHOLINEPHOSPHATE                              | 3046.3877 |
| 1360 | RC_AA455921_at_GI_42661956-S   | EST: aa14f10.s1 Soares NhHMPu S1              | 3046.9412 |
| 1361 | M34041_at_GI_33598959-S        | Alpha-2-adrenergic receptor (alpha-2 c2)      | 3047.1016 |
| 1362 | AB004884_at_GI_45643116-S      | PKU-alpha, partial cds                        | 3047.5818 |
| 1363 | U24704_at_GI_5292160-A         | Ras GTPase-activating-like protein            | 3047.6873 |
| 1364 | AA291444_at_NA_illumina        | Novel centrosomal protein RanBPM              | 3047.7053 |



|      |                                |                                              |           |
|------|--------------------------------|----------------------------------------------|-----------|
| 1365 | U83598_at_GI_23200030-A        | Death domain receptor 3 soluble form         | 3048.0327 |
| 1366 | U41068_cds2_s_at_GI_18201914-A | Retinoid X receptor beta (RXRbeta) gene,     | 3048.1643 |
| 1367 | J03824_at_GI_4557872-S         | UROS Uroporphyrinogen III synthase           | 3049.094  |
| 1368 | X68836_at_GI_34147493-S        | S-ADENOSYLMETHIONINE                         | 3049.41   |
| 1369 | AA456343_at_NA_illumina        | Scaffold attachment factor B                 | 3049.6128 |
| 1370 | U07559_at_GI_4504736-S         | ISL1 ISL1 transcription factor,              | 3050.2378 |
| 1371 | D63480_at_GI_37555995-S        | KIAA0146 gene, partial cds                   | 3050.334  |
| 1372 | S78653_at_GI_16418462-S        | Mrg=mas-related [human, Genomic, 2416        | 3050.697  |
| 1373 | D87436_at_GI_22027649-S        | KIAA0249 gene                                | 3051.7744 |
| 1374 | D78275_at_GI_24430159-S        | Proteasome subunit p42                       | 3051.907  |
| 1375 | X53002_s_at_NA_illumina        | ITGB5 Integrin beta-5 subunit                | 3052.4758 |
| 1376 | D83646_at_NA_illumina          | Metalloproteinase                            | 3052.5684 |
| 1377 | M28215_at_GI_31543538-S        | RAS-RELATED PROTEIN RAB-5A                   | 3052.73   |
| 1378 | M34668_at_GI_18450370-A        | PTPRA Protein tyrosine phosphatase,          | 3052.965  |
| 1379 | RC_AA001648_at_GI_34303922-S   | EST: zh82g08.s1 Soares fetal liver spleen    | 3053.545  |
| 1380 | U79267_at_GI_4826933-S         | Clone 23840 mRNA, partial cds                | 3054.2234 |
| 1381 | D86964_at_GI_31377467-S        | KIAA0209 gene, partial cds                   | 3054.2505 |
| 1382 | U01120_at_GI_4557598-S         | G6PT Glucose-6-phosphatase                   | 3054.269  |
| 1383 | X16901_at-2_NA_illumina        | General transcription factor IIF,            | 3054.4998 |
| 1384 | X16901_at_GI_4758487-S         | TRANSCRIPTION INITIATION FACTOR              | 3054.4998 |
| 1385 | RC_AA021624_at_NA_illumina     | EST: ze67g03.s1 Soares retina N2b4HR         | 3055.322  |
| 1386 | U07000_cds4_at_NA_illumina     | BCR gene (unknown) extracted from            | 3055.3313 |
| 1387 | RC_AA015751_at_NA_illumina     | EST: ze30d05.s1 Soares retina N2b4HR         | 3055.9666 |
| 1388 | AA293072_at_NA_illumina        | EST: zt48d09.r1 Soares ovary tumor           | 3056.3875 |
| 1389 | U80770_at_NA_illumina          | Human EST clone 251800 mariner               | 3057.0454 |
| 1390 | HG909-HT909_at_NA_illumina     | Mg81                                         | 3057.476  |
| 1391 | J04058_at_GI_4503606-S         | ETFa Electron-transfer-flavoprotein, alpha   | 3057.5671 |
| 1392 | R96417_at_NA_illumina          | EST: yq37e05.r1 Homo sapiens cDNA            | 3058.126  |
| 1393 | X04327_at_GI_40353767-A        | BPGM 2,3-bisphosphoglycerate mutase          | 3058.229  |
| 1394 | J04027_at_GI_4502286-S         | Adenosine triphosphatase mRNA                | 3058.4407 |
| 1395 | HG3075-HT3236_s_at_NA_illumina | Focal Adhesion Kinase                        | 3058.5762 |
| 1396 | U18288_at_NA_illumina          | Clone CIITA-10 MHC class II transactivator   | 3059.4421 |
| 1397 | U83410_at_GI_19482173-S        | CUL-2 (cul-2) mRNA                           | 3059.6162 |
| 1398 | L13042_at_NA_illumina          | VITAMIN D-DEPENDENT CALCIUM-                 | 3060.0732 |
| 1399 | U79285_at_NA_illumina          | GLYCYLPEPTIDE N-                             | 3060.3179 |
| 1400 | J05556_at_GI_4505220-S         | MMP8 Matrix metalloproteinase 8              | 3060.364  |
| 1401 | U61397_s_at_NA_illumina        | Ubiquitin-homology domain protein PIC1       | 3060.3687 |
| 1402 | S81439_at_NA_illumina          | TGF-beta inducible early protein (TIEG)      | 3060.8093 |
| 1403 | RC_AA228002_i_at_NA_illumina   | EST: zr58a01.s1 Soares NhHMPu S1             | 3060.948  |
| 1404 | U03397_s_at_GI_23510438-S      | Receptor protein 4-1BB mRNA                  | 3061.182  |
| 1405 | HG3148-HT3324_s_at_NA_illumina | Major Histocompatibility Complex, Class Iii, | 3061.552  |
| 1406 | M14123_xpt2_at_NA_illumina     | Gag 1 protein from Human endogenous          | 3061.671  |
| 1407 | U01877_at_GI_4557556-S         | P300 protein mRNA                            | 3062.1125 |

|      |                                |                                           |           |
|------|--------------------------------|-------------------------------------------|-----------|
| 1408 | L32179_at_GI_4557226-S         | Arylacetamide deacetylase mRNA            | 3062.2734 |
| 1409 | U90912_at_GI_24308130-S        | Clone 23865 mRNA sequence                 | 3062.31   |
| 1410 | R55076_s_at_GI_4758191-S       | EST: yj76h05.r1 Homo sapiens cDNA         | 3062.619  |
| 1411 | RC_AA481045_at_GI_5729741-S    | EST: aa29c04.s1 NCI_CGAP_GCB1             | 3063.2588 |
| 1412 | L76517_at_GI_7549814-A         | (clone cc44) senilin 1 (PS1; S182) mRNA   | 3064.128  |
| 1413 | AA174185_at_GI_4759139-S       | Solute carrier family 9 (sodium/hydrogen  | 3064.388  |
| 1414 | L02867_at_GI_32698689-S        | 62 kDa paraneoplastic antigen mRNA, 3'    | 3064.813  |
| 1415 | U56816_at_GI_33383240-A        | Kinase Myt1 (Myt1) mRNA                   | 3064.927  |
| 1416 | M29960_at_NA_illumina          | Steroid receptor (TR2-11) mRNA            | 3065.1802 |
| 1417 | T81141_at_NA_illumina          | Yd24d03.r1 Homo sapiens cDNA clone        | 3065.4272 |
| 1418 | U09002_at_GI_6006002-S         | N-methyl-D-aspartate receptor modulatory  | 3065.6843 |
| 1419 | D88378_at_GI_30581144-A        | Proteasome inhibitor hPI31 subunit        | 3066.1812 |
| 1420 | L19711_at_GI_4758115-S         | Dystroglycan (DAG1) mRNA                  | 3066.2607 |
| 1421 | U53786_at_GI_4503612-S         | EVPL Envoplakin                           | 3066.3013 |
| 1422 | D82667_at_GI_42476075-S        | EST: similar to none, mRNA sequence.      | 3066.3274 |
| 1423 | AA054120_at_NA_illumina        | EST: zf50h06.r1 Soares retina N2b4HR      | 3066.4146 |
| 1424 | X59543_at_GI_21071083-S        | RIBONUCLEOSIDE-DIPHOSPHATE                | 3066.4336 |
| 1425 | X78925_at_GI_24431954-S        | ZNF2 Zinc finger protein 2 (A1-5)         | 3066.5708 |
| 1426 | X56411_rna1_at_GI_11496889-S   | ADH4 gene for class II alcohol            | 3066.6287 |
| 1427 | AA477715_at_GI_30089939-S      | EST: zu44e10.r1 Soares ovary tumor        | 3066.787  |
| 1428 | S65583_rna1_at_GI_34328925-A   | SP-10= intra-acrosomal protein            | 3066.9114 |
| 1429 | RC_AA286711_at_NA_illumina     | EST: zs54e03.s1 NCI_CGAP_GCB1             | 3067.215  |
| 1430 | D38552_at_NA_illumina          | KIAA0073 gene, partial cds                | 3067.3171 |
| 1431 | X67491_f_at_NA_illumina        | Glutamate dehydrogenase                   | 3067.6826 |
| 1432 | Z47727_at_GI_14589955-S        | RNA polymerase II subunit                 | 3067.8638 |
| 1433 | AA421254_at_NA_illumina        | EST: zu27h10.r1 Soares ovary tumor        | 3068.1038 |
| 1434 | X62515_s_at_NA_illumina        | HSPG2 Heparan sulfate proteoglycan        | 3068.1707 |
| 1435 | HG1733-HT1748_at_NA_illumina   | Moloney Murine Sarcoma Viral Oncogene     | 3068.263  |
| 1436 | M14565_at_GI_4503188-S         | CYP11A Cytochrome P450, subfamily XIA     | 3068.8225 |
| 1437 | AA285246_at_GI_14042940-S      | EST: PMY0746 KG1-a Lambda Zap             | 3068.955  |
| 1438 | X99586_s_at_NA_illumina        | Ubiquitin-homology domain protein PIC1    | 3070.0818 |
| 1439 | U04343_at_GI_29029571-A        | CD86 CD86 antigen (CD28 antigen ligand    | 3070.4175 |
| 1440 | U13737_at_GI_14790114-A        | Cysteine protease CPP32 isoform alpha     | 3071.2056 |
| 1441 | T55975_at_GI_27886592-A        | Yb35g12.r1 Homo sapiens cDNA clone        | 3071.8518 |
| 1442 | D80003_at_GI_32307127-S        | KIAA0181 gene, partial cds                | 3072.093  |
| 1443 | J02963_at_GI_6006009-S         | ITGA2B Integrin, alpha 2b (platelet       | 3072.093  |
| 1444 | D31762_at_GI_6912449-S         | KIAA0057 gene                             | 3072.1062 |
| 1445 | AA167186_at_GI_25188194-S      | Zp12h09.r1 Stratagene fetal retina 937202 | 3072.1333 |
| 1446 | M98833_at_GI_7110592-S         | FLI1 Friend leukemia virus integration 1  | 3072.71   |
| 1447 | L02321_at_GI_23065562-S        | GSTM5 Glutathione S-transferase M5        | 3072.7668 |
| 1448 | U43292_at_GI_4826827-S         | MDS1B (MDS1) mRNA                         | 3072.8052 |
| 1449 | D42054_at_NA_illumina          | KIAA0092 gene                             | 3073.1719 |
| 1450 | HG4094-HT4364_s_at_NA_illumina | Transcription Factor Lsf-Id               | 3073.2532 |

|      |                                |                                          |           |
|------|--------------------------------|------------------------------------------|-----------|
| 1451 | U77975_at_GI_24307886-S        | Hepatocyte nuclear factor 6 (HNF-6)      | 3073.346  |
| 1452 | W27637_at_NA_illumina          | EST: 35h2 Human retina cDNA randomly     | 3073.4033 |
| 1453 | W31691_at_NA_illumina          | EST: zb93c08.r1 Soares parathyroid tumor | 3073.779  |
| 1454 | R55883_s_at_NA_illumina        | EST: yg92b01.r1 Homo sapiens cDNA        | 3073.8628 |
| 1455 | X02875_s_at_NA_illumina        | OIAS (2'-5') oligoadenylate synthetase   | 3074.4294 |
| 1456 | U66468_at_GI_33589823-S        | Cell growth regulator CGR11 mRNA         | 3074.4841 |
| 1457 | W26231_at_NA_illumina          | H.sapiens mRNA for NRD1 convertase       | 3074.6067 |
| 1458 | HG3417-HT3600_s_at_NA_illumina | Gtp Cyclohydrolase I, Alt. Splice 1      | 3074.6453 |
| 1459 | M86852_at_GI_4506342-S         | PXMP3 Peroxisomal membrane protein 3     | 3075.5112 |
| 1460 | M35296_at_GI_6382059-A         | Tyrosine kinase arg gene mRNA            | 3075.5127 |
| 1461 | RC_AA436831_at_NA_illumina     | EST: zv57f12.s1 Soares testis NHT Homo   | 3076.2979 |
| 1462 | U79256_at_GI_29126188-S        | Clone 23719 mRNA sequence                | 3077.2625 |
| 1463 | J03068_at_GI_7662457-S         | APEH N-acylaminoacyl-peptide hydrolase   | 3077.524  |
| 1464 | L36844_at_GI_17981693-A        | (clone p15INK4B/HA5) CDK inhibitory      | 3077.7622 |
| 1465 | D49410_at_GI_28416950-S        | IL3RA Interleukin 3 receptor, alpha (low | 3078.2478 |
| 1466 | U77968_at_GI_22027481-S        | MOP5 mRNA, partial cds                   | 3078.3147 |
| 1467 | RC_AA115299_at_GI_42662500-S   | EST: zl09d11.s1 Soares pregnant uterus   | 3078.5771 |
| 1468 | X63679_at_GI_31543822-S        | TRAMP protein                            | 3078.5977 |
| 1469 | M25322_at_GI_6031196-S         | SELP Selectin P (granule membrane        | 3079.1433 |
| 1470 | AA215299_i_at_GI_7706422-S     | Homo sapiens chromosome 19, cosmid       | 3079.2798 |
| 1471 | M13149_at_GI_13518024-S        | HRG Histidine-rich glycoprotein          | 3079.365  |
| 1472 | U33841_at_GI_20336200-A        | ATM Ataxia telangiectasia mutated        | 3079.4368 |
| 1473 | X98411_at_GI_27544940-S        | Myosin-IE                                | 3079.4797 |
| 1474 | U37248_at_GI_6631092-S         | Alpha-mannosidase (6A8) mRNA             | 3079.693  |
| 1475 | AA135452_at_GI_21361098-S      | CGG triplet repeat binding protein 1     | 3079.7124 |
| 1476 | M13981_at_GI_9257223-S         | INHA Inhibin, alpha                      | 3079.74   |
| 1477 | Z29678_at_GI_38156696-A        | MitF mRNA                                | 3079.884  |
| 1478 | Z80345_rna1_s_at_GI_4557232-S  | SCAD gene, exon 1 and joining features   | 3080.3704 |
| 1479 | U37352_at_GI_31083249-A        | PPP2R4 Protein phosphatase 2A,           | 3080.5757 |
| 1480 | X12953_at_NA_illumina          | RAB2 RAB2, member RAS oncogene           | 3080.775  |
| 1481 | HG2463-HT2559_at_NA_illumina   | Guanine Nucleotide-Binding Protein G25k  | 3080.7896 |
| 1482 | U09178_s_at_GI_4557874-S       | Dihydropyrimidine dehydrogenase mRNA     | 3081.1785 |
| 1483 | AA220220_at_NA_illumina        | EST: PMY0265 KG1-a Lambda Zap            | 3081.3845 |
| 1484 | D29956_at_GI_41281375-S        | PROBABLE UBIQUITIN CARBOXYL-             | 3081.4236 |
| 1485 | D26361_at_GI_7661877-S         | KIAA0042 gene                            | 3081.4294 |
| 1486 | M74558_s_at_NA_illumina        | TAL1 (SCL) interrupting locus            | 3082.3123 |
| 1487 | D11327_s_at_GI_18375661-A      | PTPN7 Protein tyrosine phosphatase, non- | 3082.3909 |
| 1488 | L49229_f_at_NA_illumina        | Retinoblastoma susceptibility protein    | 3082.7942 |
| 1489 | RC_AA056727_at_NA_illumina     | EST: zk81a01.s1 Soares pregnant uterus   | 3083.105  |
| 1490 | L00205_at_GI_17505187-S        | KERATIN, TYPE II CYTOSKELETAL 6D         | 3083.208  |
| 1491 | AB002326_at_GI_27436958-S      | Human mRNA for KIAA0328 gene, partial    | 3083.2659 |
| 1492 | AA431707_at_NA_illumina        | EST: zw72h08.r1 Soares testis NHT Homo   | 3083.4866 |
| 1493 | X70649_at_GI_4826685-S         | Cl.1042 mRNA of DEAD box protein family  | 3083.6533 |

|      |                                |                                            |           |
|------|--------------------------------|--------------------------------------------|-----------|
| 1494 | X84194_at_GI_45243546-I        | ACYLPHOSPHATASE, ORGAN-                    | 3083.7642 |
| 1495 | RC_AA129268_s_at_NA_illumina   | Homo sapiens mRNA for KIAA0650             | 3084.6545 |
| 1496 | U79303_at_GI_9558742-S         | Clone 23882 mRNA                           | 3084.9246 |
| 1497 | U90546_r_at_NA_illumina        | Butyrophilin (BTF4) mRNA                   | 3085.0625 |
| 1498 | RC_AA151771_at_NA_illumina     | EST: zo01a07.s1 Stratagene colon           | 3085.4282 |
| 1499 | X68194_at_NA_illumina          | Pantophysin [human, keratinocyte line      | 3085.6335 |
| 1500 | U43318_at_GI_27894384-S        | Putative transmembrane receptor (frizzled  | 3085.674  |
| 1501 | U57843_s_at_NA_illumina        | Human phosphatidylinositol 3-kinase delta  | 3085.714  |
| 1502 | D89289_at_GI_30410729-A        | N-Acetyl-beta-D-glucosaminide              | 3086.0662 |
| 1503 | U04806_s_at_NA_illumina        | FLT3/FLK2 ligand mRNA                      | 3086.0735 |
| 1504 | M63967_at_GI_25777729-S        | ALDEHYDE DEHYDROGENASE,                    | 3086.1162 |
| 1505 | U13220_at_GI_4557594-S         | Forkhead protein FREAC-2 mRNA, partial     | 3086.4626 |
| 1506 | AC002045_xpt1_at_NA_illumina   | A-589H1.1 from Homo sapiens                | 3086.5989 |
| 1507 | AA429706_at_NA_illumina        | Thioredoxin-like, 32kD                     | 3086.6204 |
| 1508 | AF007111_at_GI_4505138-S       | MDM2-like p53-binding protein (MDMX)       | 3086.978  |
| 1509 | AF007111_at-2_NA_illumina      | Mouse double minute 4, human homolog       | 3086.978  |
| 1510 | M25164_at_GI_42490754-S        | THYROTROPIN BETA CHAIN                     | 3087.0576 |
| 1511 | D13634_at_NA_illumina          | KIAA0009 gene                              | 3087.6682 |
| 1512 | RC_AA427745_at_NA_illumina     | EST: zw26h02.s1 Soares ovary tumor         | 3087.7083 |
| 1513 | HG4334-HT4604_s_at_NA_illumina | Glycogenin                                 | 3087.7166 |
| 1514 | U85943_at_NA_illumina          | mRNA-associated protein mrnp41 mRNA        | 3087.8193 |
| 1515 | Y00971_at_GI_31543442-S        | PRPS2 Phosphoribosyl pyrophosphate         | 3088.119  |
| 1516 | AA340065_s_at_GI_14917118-S    | Homo sapiens hHa4 gene, complete CDS       | 3088.2185 |
| 1517 | RC_AA402607_at_NA_illumina     | Zu49b05.s1 Soares ovary tumor NbHOT        | 3088.284  |
| 1518 | S74728_at_GI_4557342-S         | Antiquitin                                 | 3088.4048 |
| 1519 | D43968_at_GI_19923197-S        | CBFA2 Proto-oncogene AML1 {alternative     | 3088.6365 |
| 1520 | Z19675_at_GI_38683846-S        | EST: H. sapiens putatively transcribed     | 3088.8772 |
| 1521 | D63861_s_at_GI_45439320-S      | DNA for cyclophilin 40                     | 3088.9438 |
| 1522 | D50927_at_GI_33636697-S        | KIAA0137 gene                              | 3088.966  |
| 1523 | L16782_at_GI_7705347-S         | Putative M phase phosphoprotein 1          | 3089.2083 |
| 1524 | RC_AA149826_at_GI_40254867-S   | EST: zl48d11.s1 Soares pregnant uterus     | 3089.317  |
| 1525 | U79251_at_GI_13518022-S        | OPCML Opioid-binding cell adhesion         | 3090.9143 |
| 1526 | L10386_at_GI_39777600-S        | TGM3 Transglutaminase 3 (E polypeptide,    | 3092.1338 |
| 1527 | M86406_at_GI_4501892-S         | ACTN2 Actinin alpha 2                      | 3092.4136 |
| 1528 | U49844_at_GI_20143978-S        | Protein kinase ATR mRNA                    | 3092.8196 |
| 1529 | M12625_at_GI_4557891-S         | Lecithin-cholesterol acyltransferase       | 3092.8286 |
| 1530 | D13540_at_GI_33356176-S        | PTPN11 Protein tyrosine phosphatase,       | 3093.252  |
| 1531 | M23379_at_GI_12545405-A        | RASA1 GTPase-activating protein ras p21    | 3094.321  |
| 1532 | W28747_at_NA_illumina          | Eukaryotic translation initiation factor 5 | 3094.3945 |
| 1533 | U48263_at_GI_11079650-S        | Pre-pro-orphanin FQ (OFQ) mRNA             | 3094.6958 |
| 1534 | U48263_at-2_NA_illumina        | Prepronociceptin                           | 3094.6958 |
| 1535 | L05568_at_GI_33286426-S        | SLC6A4 Solute carrier family 6             | 3094.743  |
| 1536 | HG162-HT3165_at_NA_illumina    | Tyrosine Kinase, Receptor Axl, Alt. Splice | 3094.9856 |

|      |                                |                                             |           |
|------|--------------------------------|---------------------------------------------|-----------|
| 1537 | AA452721_at_GI_21735576-S      | Zx39d08.r1 Soares total fetus Nb2HF8 9w     | 3095.046  |
| 1538 | U04209_at_GI_5174552-S         | Associated microfibrillar protein mRNA      | 3095.5088 |
| 1539 | X54936_at_GI_34147600-S        | PGF Placental growth factor, vascular       | 3095.574  |
| 1540 | RC_AA034926_at_NA_illumina     | EST: zk25e02.s1 Soares pregnant uterus      | 3095.8337 |
| 1541 | R91222_at_GI_42516562-S        | EST: yp94h08.r1 Homo sapiens cDNA           | 3095.9778 |
| 1542 | AA292171_at_NA_illumina        | EST: zt50d08.r1 Soares ovary tumor          | 3096.4885 |
| 1543 | X75346_s_at_NA_illumina        | MAP KINASE-ACTIVATED PROTEIN                | 3096.51   |
| 1544 | M89470_s_at_GI_34878715-A      | PAX2 Paired box homeotic gene 2             | 3096.6077 |
| 1545 | M95767_at_GI_4758091-S         | CTB Chitobiase, di-N-acetyl-                | 3097.0413 |
| 1546 | M95767_at-2_NA_illumina        | Chitobiase, di-N-acetyl-                    | 3097.0413 |
| 1547 | L42374_s_at_GI_30795206-S      | PP2A B56-beta mRNA                          | 3097.1934 |
| 1548 | U72515_at_GI_42542393-S        | C3f mRNA                                    | 3097.2058 |
| 1549 | X71877_at_GI_4503136-S         | CTRL Chymotrypsin-like                      | 3097.436  |
| 1550 | FAS_at_NA_illumina             | No description for gene: FAS_at             | 3098.4092 |
| 1551 | D28532_at_GI_4827009-S         | Renal Na+-dependent phosphate               | 3098.5852 |
| 1552 | X14445_at_GI_15451899-S        | INT-2 PROTO-ONCOGENE PROTEIN                | 3098.72   |
| 1553 | U79276_at_NA_illumina          | Human clone 23960 mRNA sequence             | 3099.08   |
| 1554 | J03171_at_GI_10835182-S        | INTERFERON-ALPHA/BETA RECEPTOR              | 3099.2336 |
| 1555 | AF012270_at_GI_5730018-S       | Peropsin (Rrh) mRNA                         | 3099.328  |
| 1556 | AF012270_at-2_NA_illumina      | Homo sapiens visual pigment-like receptor   | 3099.328  |
| 1557 | X78687_at_GI_40806202-S        | G9 gene encoding sialidase                  | 3099.492  |
| 1558 | W74391_at_NA_illumina          | EST: zd62a12.r1 Soares fetal heart          | 3099.61   |
| 1559 | L05425_at_NA_illumina          | Autoantigen mRNA                            | 3099.7124 |
| 1560 | C17282_at_GI_6005873-S         | EST: Human placenta cDNA 5'-end GEN-        | 3099.7573 |
| 1561 | HG4063-HT4333_s_at_NA_illumina | Transcription Factor Hbf-2                  | 3100.6868 |
| 1562 | H72545_at_NA_illumina          | Homo sapiens mRNA for E1B-55kDa-            | 3100.9595 |
| 1563 | U72936_s_at_NA_illumina        | X-LINKED HELICASE II                        | 3101.2622 |
| 1564 | M65085_at_GI_31657135-A        | FSHR Follicle stimulating hormone           | 3101.3665 |
| 1565 | R88021_at_NA_illumina          | EST: ym87d05.r1 Homo sapiens cDNA           | 3101.511  |
| 1566 | HG3925-HT4195_s_at_NA_illumina | Surfactant Protein Sp-A2 Delta              | 3101.622  |
| 1567 | L41919_rna1_at_GI_5729870-S    | HIC-1 gene fragment                         | 3101.6365 |
| 1568 | D29677_at_GI_7661883-S         | HYPOTHETICAL MYELOID CELL LINE              | 3101.71   |
| 1569 | M87770_at_GI_13186266-A        | FGFR2 Fibroblast growth factor receptor 2   | 3102.3157 |
| 1570 | U18671_rna1_at_GI_38202247-S   | Stat2 gene                                  | 3102.481  |
| 1571 | H67840_at_NA_illumina          | EST: yu15h07.r1 Homo sapiens cDNA           | 3103.4338 |
| 1572 | L20826_at_GI_4505896-S         | I-plastin mRNA                              | 3103.587  |
| 1573 | U01157_at_GI_19923203-S        | GLP1R Glucagon-like peptide 1 receptor      | 3103.588  |
| 1574 | RC_AA176164_r_at_NA_illumina   | EST: zp23h11.s1 Stratagene                  | 3103.7747 |
| 1575 | K02882_cds1_s_at_NA_illumina   | IGHD gene (immunoglobulin delta-chain)      | 3103.8745 |
| 1576 | AB000450_at_GI_31543935-S      | VRK2                                        | 3103.8955 |
| 1577 | S73813_at_GI_45580699-S        | CD39 CD39 antigen                           | 3104.0334 |
| 1578 | U60666_at_NA_illumina          | Testis specific leucine rich repeat protein | 3104.0918 |
| 1579 | X52011_at_GI_4505298-S         | MYF6 Muscle determination factor            | 3104.2715 |

|      |                                |                                         |           |
|------|--------------------------------|-----------------------------------------|-----------|
| 1580 | D80009_at_GI_41281482-S        | KIAA0187 gene                           | 3104.688  |
| 1581 | HG2175-HT2245_s_at_NA_illumina | Myosin, Heavy Polypeptide 10, Non-      | 3105.1426 |
| 1582 | U19247_rna1_s_at_GI_4557879-S  | Interferon-gamma receptor alpha chain   | 3105.244  |
| 1583 | U21551_at_GI_38569441-S        | ECA39 mRNA                              | 3105.2559 |
| 1584 | M11025_s_at_GI_18426876-A      | ASGR2 Asialoglycoprotein receptor 2     | 3105.7256 |
| 1585 | U50950_at_GI_32483368-A        | Infant brain unknown product mRNA       | 3105.728  |
| 1586 | L14856_at_GI_4557862-S         | Somatostatin receptor gene              | 3105.8945 |
| 1587 | S61953_at_NA_illumina          | ERBB3 V-erb-b2 avian erythroblastic     | 3106.1401 |
| 1588 | Z21089_at_NA_illumina          | EST: H. sapiens putatively transcribed  | 3106.2007 |
| 1589 | X64728_at_GI_4502810-S         | CHML mRNA                               | 3106.2236 |
| 1590 | AA480073_at_NA_illumina        | EST: zv42a08.r1 Soares ovary tumor      | 3106.2446 |
| 1591 | L47276_s_at_NA_illumina        | (cell line HL-60) alpha topoisomerase   | 3106.337  |
| 1592 | AA071256_at_NA_illumina        | Zm73d01.r1 Stratagene neuroepithelium   | 3106.3533 |
| 1593 | AA209232_at_GI_42655683-S      | EST: zq85e01.r1 Stratagene hNT neuron   | 3106.5017 |
| 1594 | M31158_at_GI_4506064-S         | PRKAR2B Protein kinase, cAMP-           | 3106.5347 |
| 1595 | C06269_at_GI_13375741-S        | EST: similar to none, mRNA sequence.    | 3106.5576 |
| 1596 | M57763_at_GI_6996000-S         | ARF6 ADP-ribosylation factor 6          | 3106.6184 |
| 1597 | L08187_at_GI_14577916-S        | Cytokine receptor (EBI3) mRNA           | 3106.8848 |
| 1598 | RC_AA436156_s_at_NA_illumina   | EST: zv22b10.s1 Soares NhHMPu S1        | 3106.8965 |
| 1599 | X70991_at_GI_42734426-S        | MADER mRNA                              | 3107.0896 |
| 1600 | RC_AA283800_at_GI_19525732-S   | EST: zs44g09.s1 NCI_CGAP_GCB1           | 3107.093  |
| 1601 | L32961_at_GI_38679949-S        | 4-AMINO BUTYRATE                        | 3107.5732 |
| 1602 | L16991_at-2_NA_illumina        | THYMIDYLATE KINASE                      | 3107.7698 |
| 1603 | L16991_at_GI_42544173-S        | DTYMK Deoxythymidylate kinase           | 3107.7698 |
| 1604 | U20938_at_NA_illumina          | Lymphocyte dihydropyrimidine            | 3107.8474 |
| 1605 | U88047_at_GI_4885192-S         | DNA binding protein homolog (DRIL)      | 3108.0447 |
| 1606 | U88047_at-2_NA_illumina        | Homo sapiens DNA binding protein        | 3108.0447 |
| 1607 | D82614_at_NA_illumina          | EST: similar to PGK1, mRNA sequence.    | 3108.3435 |
| 1608 | RC_AA442772_at_GI_37577129-A   | EST: zv60d02.s1 Soares testis NHT Homo  | 3109.0986 |
| 1609 | AA027757_at_NA_illumina        | EST: HPLA_CCLEE_24b9u HPLA CCLee        | 3110.4414 |
| 1610 | S81083_cds1_at_GI_9257187-A    | <beta>-ADD gene extracted from beta -   | 3111.1096 |
| 1611 | RC_AA600152_at_NA_illumina     | EST: ae50e03.s1 Stratagene lung         | 3111.1624 |
| 1612 | RC_D59489_at_NA_illumina       | EST: Human fetal brain cDNA 3'-end GEN- | 3111.1692 |
| 1613 | U43916_s_at_GI_4503558-S       | B4B                                     | 3111.5894 |
| 1614 | Y08639_at_GI_19743906-S        | Nuclear orphan receptor ROR-beta        | 3111.6045 |
| 1615 | D14446_at_GI_42544197-A        | HFREP-1 mRNA for unknown protein        | 3111.9673 |
| 1616 | U77129_at_GI_38570133-S        | SPS1/STE20 homolog KHS1 mRNA            | 3112.2168 |
| 1617 | RC_AA165231_at_NA_illumina     | EST: zo89c09.s1 Stratagene ovarian      | 3112.9775 |
| 1618 | U35113_at_GI_14141149-S        | Metastasis-associated mta1 mRNA         | 3114.2168 |
| 1619 | X70297_at_GI_23312389-A        | CHRNA7 Cholinergic receptor, nicotinic, | 3114.326  |
| 1620 | K01900_at_GI_4504598-S         | IFNA8 Interferon, alpha 8               | 3114.3735 |
| 1621 | D87444_at_GI_41281478-S        | KIAA0255 gene                           | 3114.8774 |
| 1622 | U32680_at_GI_4502888-S         | CLN3 Ceroid-lipofuscinosis, neuronal 3, | 3115.0793 |

|      |                              |                                             |           |
|------|------------------------------|---------------------------------------------|-----------|
| 1623 | U66469_at_GI_5729764-S       | Cell growth regulator CGR19 mRNA            | 3115.3232 |
| 1624 | H71130_at_NA_illumina        | Ys13d10.r1 Homo sapiens cDNA clone          | 3115.5579 |
| 1625 | U10550_at_GI_32483370-A      | Gem GTPase (gem) mRNA                       | 3115.682  |
| 1626 | D50920_at_GI_41281495-S      | KIAA0130 gene                               | 3116.2573 |
| 1627 | U64675_at_GI_19718753-A      | SRI Sorcin                                  | 3116.7383 |
| 1628 | D14582_s_at_GI_37577286-A    | Epimorphin                                  | 3116.7463 |
| 1629 | AA092146_at_NA_illumina      | Dihydropyrimidinase-like 3                  | 3116.756  |
| 1630 | U00672_at_GI_24430213-S      | IL10R Interleukin 10 receptor               | 3116.834  |
| 1631 | U10324_at_GI_24234755-A      | Nuclear factor NF90 mRNA                    | 3117.118  |
| 1632 | X92493_s_at_GI_4505816-S     | STM-7 protein                               | 3117.2278 |
| 1633 | Z35491_at_GI_7549801-S       | Novel glucocorticoid receptor-associated    | 3117.3777 |
| 1634 | R96540_at_GI_40354199-S      | EST: yq54c04.r1 Homo sapiens cDNA           | 3117.6143 |
| 1635 | U09851_s_at_NA_illumina      | ZNF148 Zinc finger protein 148 (pHZ-52)     | 3117.6628 |
| 1636 | HG2602-HT2698_at_NA_illumina | Succinate Dehydrogenase, Flavoprotein       | 3117.7656 |
| 1637 | U24186_at_NA_illumina        | Replication protein A complex 34 kd         | 3117.8086 |
| 1638 | S46622_at_GI_34147659-S      | Calcineurin A catalytic subunit [human,     | 3118.3381 |
| 1639 | U32439_at_GI_21361148-S      | Regulator of G-protein signaling similarity | 3118.5547 |
| 1640 | U34605_at_GI_6912629-S       | Retinoic acid- and interferon-inducible 58K | 3118.9888 |
| 1641 | R67468_at_NA_illumina        | EST: yi33b11.r1 Homo sapiens cDNA           | 3119.2039 |
| 1642 | U66678_at_GI_27881504-A      | Homo sapiens mRNA for putative ABC          | 3119.2888 |
| 1643 | X07876_at_GI_4507926-S       | WNT2 Wingless-type MMTV integration         | 3119.6064 |
| 1644 | R17568_at_NA_illumina        | EST: yg13g10.r1 Homo sapiens cDNA           | 3119.7036 |
| 1645 | Y07909_at_NA_illumina        | B4B                                         | 3119.8147 |
| 1646 | U60061_at_NA_illumina        | RPS26 Ribosomal protein S26                 | 3119.8833 |
| 1647 | AA452705_at_GI_38679925-S    | EST: zx39c03.r1 Soares total fetus          | 3119.9358 |
| 1648 | U51587_at_GI_42490756-S      | Golgi complex autoantigen golgin-97         | 3120.0505 |
| 1649 | AF007551_at_GI_41349434-S    | Bet1p homolog (hbet1) mRNA                  | 3120.7378 |
| 1650 | X60992_at_GI_5802993-S       | T-CELL DIFFERENTIATION ANTIGEN              | 3121.0203 |
| 1651 | X67235_s_at_GI_17978473-S    | PRHX Proline-rich homeodomain-              | 3121.3975 |
| 1652 | W04732_at_GI_37594466-S      | EST: za76b09.r1 Soares fetal lung           | 3121.5881 |
| 1653 | L16895_at_GI_21264603-S      | LOX Lysyl oxidase                           | 3122.0469 |
| 1654 | AA256257_at_GI_24430221-A    | Interleukin 1 receptor accessory protein    | 3122.1357 |
| 1655 | U15642_s_at_GI_12669916-S    | E2F5 E2F transcription factor 5, p130-      | 3122.2615 |
| 1656 | X83492_s_at_NA_illumina      | Fas/Apo-1 (clone pCRTM11-Fasdelta(4,7))     | 3122.4675 |
| 1657 | RC_AA448255_at_NA_illumina   | EST: zw83e08.s1 Soares testis NHT           | 3122.4907 |
| 1658 | X66503_at_GI_34577062-S      | Adenylosuccinate synthetase mRNA            | 3122.7607 |
| 1659 | U16861_at_GI_22095339-S      | Inward rectifier K+ channel protein (hirk1) | 3122.7664 |
| 1660 | N91292_at_NA_illumina        | SudD (suppressor of bimD6, Aspergillus      | 3122.9421 |
| 1661 | AF005887_at_GI_6671584-S     | ATF family member ATF6 (ATF6) mRNA          | 3123.699  |
| 1662 | AA234792_at_NA_illumina      | Zr78c01.r1 Soares NhHMPu S1 Homo            | 3123.8235 |
| 1663 | U49188_at_GI_39812087-A      | Placenta (Diff33) mRNA                      | 3123.9946 |
| 1664 | M55905_at_GI_13376994-S      | ME2 Malic enzyme 2, mitochondrial           | 3124.3833 |
| 1665 | AA428531_at_GI_37540253-S    | EST: zw74f09.r1 Soares testis NHT Homo      | 3124.5935 |

|      |                                |                                            |           |
|------|--------------------------------|--------------------------------------------|-----------|
| 1666 | H51825_at_NA_illumina          | EST: yp83a08.r1 Homo sapiens cDNA          | 3124.7795 |
| 1667 | RC_AA382114_at_NA_illumina     | EST: EST95282 Activated T-cells II Homo    | 3124.8298 |
| 1668 | M20137_at_GI_28416914-S        | Interleukin 3 (IL-3) mRNA                  | 3124.9978 |
| 1669 | U09759_at_GI_21237744-A        | Protein kinase (JNK2) mRNA                 | 3125.1145 |
| 1670 | Y10375_s_at_NA_illumina        | SHPS-1                                     | 3125.1924 |
| 1671 | U89355_at_GI_4758055-S         | Clone cRT16 CREB-binding protein           | 3125.3416 |
| 1672 | U32849_at_GI_4758813-S         | Hou mRNA                                   | 3125.3447 |
| 1673 | U09367_at_GI_37594440-S        | ZNF136 Zinc finger protein 136 (clone pHZ- | 3125.3628 |
| 1674 | L44424_at_NA_illumina          | EST: Homo sapiens thymus mRNA              | 3125.657  |
| 1675 | H44213_at_GI_37595540-A        | EST: yn58e09.r1 Homo sapiens cDNA          | 3125.861  |
| 1676 | L38935_at-2_NA_illumina        | Homo sapiens GT212 mRNA                    | 3126.8574 |
| 1677 | L38935_at_GI_31342405-S        | GT212 mRNA                                 | 3126.8574 |
| 1678 | X72790_at_GI_27734820-S        | Endogenous retrovirus mRNA for ORF         | 3127.1868 |
| 1679 | J05016_rna1_s_at_NA_illumina   | (clone pA3) protein disulfide isomerase    | 3127.338  |
| 1680 | AB002332_at_GI_25777594-S      | KIAA0334 gene                              | 3127.3613 |
| 1681 | U17327_at_GI_10835172-S        | NOS1 Nitric oxide synthase 1 (neuronal)    | 3127.3723 |
| 1682 | RC_AA234348_at_NA_illumina     | EST: zr72b01.s1 Soares NhHMPu S1           | 3127.445  |
| 1683 | RC_AA349812_at_NA_illumina     | EST: EST56730 Infant brain Homo            | 3127.7898 |
| 1684 | U22897_at_GI_33519473-S        | Nuclear domain 10 protein (ndp52) mRNA     | 3127.9155 |
| 1685 | HG3432-HT3620_s_at_NA_illumina | Fibroblast Growth Factor Receptor K-Sam,   | 3128.247  |
| 1686 | M34715_at_GI_21361391-S        | PSG11 Pregnancy-specific beta-1            | 3128.635  |
| 1687 | M86699_at_GI_34303964-S        | TTK TTK protein kinase                     | 3129.3486 |
| 1688 | U39573_at_GI_40549417-S        | Salivary peroxidase mRNA                   | 3129.538  |
| 1689 | RC_AA427638_at_NA_illumina     | EST: zw30e10.s1 Soares ovary tumor         | 3129.7996 |
| 1690 | X74039_at_NA_illumina          | Variant urokinase plasminogen activator    | 3130.0376 |
| 1691 | AB002350_at_NA_illumina        | KIAA0352 gene product                      | 3130.337  |
| 1692 | U02081_at_GI_19923326-S        | Guanine nucleotide regulatory protein      | 3130.4268 |
| 1693 | L31529_at_GI_18860908-S        | Beta1-syntrophin (SNT B1) gene             | 3130.7195 |
| 1694 | L31529_at-2_NA_illumina        | Homo sapiens Tax interaction protein 43    | 3130.7195 |
| 1695 | L40586_at_NA_illumina          | IDS Iduronate 2-sulfatase (Hunter          | 3130.9138 |
| 1696 | X65724_at_GI_4557788-S         | NDP Norrie disease (pseudoglioma)          | 3130.9673 |
| 1697 | U12387_s_at_NA_illumina        | TPMT Thiopurine S-methyltransferase        | 3131.11   |
| 1698 | H79230_at_GI_20531764-S        | EST: yu27e05.r1 Homo sapiens cDNA          | 3131.2556 |
| 1699 | RC_AA121123_at_NA_illumina     | EST: zl88c05.s1 Stratagene colon           | 3131.7207 |
| 1700 | RC_AA398562_at_NA_illumina     | EST: zt73f04.s1 Soares testis NHT Homo     | 3131.854  |
| 1701 | X83127_at_NA_illumina          | K+ channel beta 1a subunit mRNA,           | 3132.4612 |
| 1702 | HG4333-HT4603_at_NA_illumina   | Zinc Finger Protein Znfp7                  | 3132.5408 |
| 1703 | S83366_cds1_at_NA_illumina     | Description: orf1 gene extracted from      | 3132.7747 |
| 1704 | W16486_at_GI_16554610-S        | EST: zb11e11.r1 Soares fetal lung          | 3132.7886 |
| 1705 | AA305099_at_GI_42490748-S      | ATP-binding cassette 7                     | 3132.7944 |
| 1706 | S81294_at_GI_4885174-S         | DCC=deleted in colorectal cancer           | 3132.8828 |
| 1707 | U26398_at_GI_4755139-A         | Inositol polyphosphate 4-phosphatase       | 3133.0076 |
| 1708 | Y00451_s_at_GI_40316942-S      | ALAS1 Aminolevulinate, delta-, synthase 1  | 3133.104  |



|      |                              |                                           |           |
|------|------------------------------|-------------------------------------------|-----------|
| 1709 | X14830_at-2_NA_illumina      | Cholinergic receptor, nicotinic, beta     | 3133.1082 |
| 1710 | X14830_at_GI_41327725-S      | CHRNB1 Cholinergic receptor, nicotinic,   | 3133.1082 |
| 1711 | R20459_at_GI_26051234-S      | Yg33f12.r1 Homo sapiens cDNA clone        | 3133.182  |
| 1712 | U43899_at_GI_21265027-S      | Signal transducing adaptor molecule       | 3133.2822 |
| 1713 | D49396_at_GI_32483376-A      | Apo1_Human (MER5(Aop1-Mouse)-like         | 3133.3682 |
| 1714 | Z29090_at_GI_5453891-S       | PHOSPHATIDYLINOSITOL 3-KINASE             | 3134.135  |
| 1715 | U74667_at_GI_36287059-A      | Tat interactive protein mRNA              | 3134.263  |
| 1716 | HG2796-HT2904_at_NA_illumina | Neural Cell Adhesion Molecule             | 3134.2842 |
| 1717 | T88846_f_at_NA_illumina      | H4 histone family, member D               | 3134.3186 |
| 1718 | U41387_at_GI_13787208-S      | Gu protein mRNA, partial cds              | 3134.445  |
| 1719 | D85939_at_GI_5453566-S       | P97 homologous protein                    | 3134.759  |
| 1720 | X87904_at_GI_41152087-S      | RPS11 Ribosomal protein S11               | 3134.8975 |
| 1721 | U81607_at_GI_21493023-A      | GRAVIN                                    | 3134.951  |
| 1722 | RC_AA258336_at_NA_illumina   | Dihydropyrimidinase-like 2                | 3135.4802 |
| 1723 | U70323_at_NA_illumina        | SCA2 Spinocerebellar ataxia 2             | 3136.3484 |
| 1724 | D38491_at_NA_illumina        | HYPOTHETICAL MYELOID CELL LINE            | 3136.3574 |
| 1725 | L25119_at_GI_4505514-S       | OPRM1 Opioid receptor, mu 1               | 3136.569  |
| 1726 | U10689_f_at_GI_29029624-S    | MAGE-5a antigen (MAGE5a) gene             | 3136.6855 |
| 1727 | D87434_at_GI_41281456-S      | KIAA0247 gene                             | 3137.0837 |
| 1728 | L09190_rna1_at_NA_illumina   | Trichohyalin (TRHY) gene                  | 3137.0896 |
| 1729 | W76080_at_GI_11184225-S      | Regulator of G-protein signalling 10      | 3137.2415 |
| 1730 | RC_AA600292_at_NA_illumina   | EST: af01h05.s1 Jia bone marrow stroma    | 3137.252  |
| 1731 | X93511_s_at_NA_illumina      | Telomeric repeat binding factor (TRF1)    | 3137.2769 |
| 1732 | AA299114_at_GI_31341302-S    | Tax1-binding protein                      | 3137.417  |
| 1733 | U03851_at_GI_41327721-S      | Capping protein alpha mRNA, partial cds   | 3137.5715 |
| 1734 | X95648_at_GI_4503502-S       | EIF2B Eukaryotic translation initiation   | 3137.9526 |
| 1735 | RC_AA459008_at_GI_23270402-A | EST: aa25c09.s1 NCI_CGAP_GCB1             | 3138.4653 |
| 1736 | U03090_at_GI_4505852-S       | Ca2+-dependent phospholipase A2 mRNA      | 3138.992  |
| 1737 | AFFX-DapX-M_at_NA_illumina   | AFFX-DapX-M_at (endogenous control)       | 3139.1377 |
| 1738 | AFFX-DapX-M_at-2_NA_illumina | AFFX-DapX-M_at (miscellaneous control -   | 3139.1377 |
| 1739 | AA410565_at_GI_34303921-S    | EST: zv23d06.r1 Soares NhHMPu S1          | 3139.2085 |
| 1740 | U82759_at_NA_illumina        | Homeodomain protein HoxA9 mRNA            | 3139.2402 |
| 1741 | AA120886_at_NA_illumina      | EST: zk99g11.r1 Soares pregnant uterus    | 3139.3682 |
| 1742 | M64497_at_GI_31377723-S      | APOLIPOPROTEIN AI REGULATORY              | 3139.6096 |
| 1743 | U35835_s_at_GI_31340617-S    | DNA-PK mRNA, partial cds                  | 3139.6692 |
| 1744 | U44378_at_NA_illumina        | Homozygous deletion target in pancreatic  | 3139.7822 |
| 1745 | M80899_at_NA_illumina        | AHNAK AHNAK nucleoprotein                 | 3139.8735 |
| 1746 | X89984_at_GI_21536441-S      | BCL7 B cell lymphoma protein 7A           | 3140.1218 |
| 1747 | U67319_at_GI_15718701-A      | Mch3 isoform alpha (Mch3) mRNA            | 3140.3071 |
| 1748 | U04520_at_GI_15890084-A      | COL4A5 Collagen, type IV, alpha 5 (Alport | 3140.4438 |
| 1749 | X99050_rna1_at_GI_21687211-S | Orf gene extracted from H.sapiens mRNA    | 3140.729  |
| 1750 | RC_AA021559_at_NA_illumina   | EST: ze69b06.s1 Soares retina N2b4HR      | 3140.871  |
| 1751 | Z48511_at_NA_illumina        | XG mRNA (clone PEP11)                     | 3141.0398 |

|      |                                |                                            |           |
|------|--------------------------------|--------------------------------------------|-----------|
| 1752 | TNFR1I_at_NA_illumina          | No description for gene: TNFR1I_at         | 3141.2632 |
| 1753 | D84145_at_GI_18426895-S        | WS-3 mRNA                                  | 3141.4739 |
| 1754 | U08989_at_GI_31543625-S        | Glutamate transporter mRNA                 | 3141.5798 |
| 1755 | U29343_at_GI_7108350-A         | HMMR Hyaluronan-mediated motility          | 3141.6775 |
| 1756 | L34357_at_GI_33188460-S        | GATA4 GATA-binding protein 4               | 3141.71   |
| 1757 | W27435_at_NA_illumina          | EST: 31f8 Human retina cDNA randomly       | 3141.7698 |
| 1758 | W40410_at_NA_illumina          | EST: zb74f10.r1 Soares fetal lung          | 3141.8406 |
| 1759 | AA095505_at_NA_illumina        | EST: l4737.seq.F Fetal heart, Lambda       | 3142.094  |
| 1760 | AA448946_s_at_NA_illumina      | EST: zx07a10.r1 Soares total fetus         | 3142.1917 |
| 1761 | RC_AA504485_at_NA_illumina     | EST: aa60e03.s1 NCI_CGAP_GCB1              | 3142.2422 |
| 1762 | U59919_at_GI_18105053-S        | Smg GDS-associated protein SMAP            | 3142.4307 |
| 1763 | AA069500_at_NA_illumina        | Homo sapiens clone 23837 mRNA              | 3142.5518 |
| 1764 | U66083_at_GI_34335238-S        | MAGE-9 antigen (MAGE9) gene                | 3142.805  |
| 1765 | S82597_rna1_s_at_GI_13124890-S | Description: UDP-GalNAc:polypeptide N-     | 3142.845  |
| 1766 | RC_AA400924_at_NA_illumina     | EST: zt78b05.s1 Soares testis NHT Homo     | 3142.9326 |
| 1767 | J04168_at_NA_illumina          | SPN Sialophorin (gpL115, leukosialin,      | 3142.95   |
| 1768 | M25753_at_GI_34304372-S        | G2/MITOTIC-SPECIFIC CYCLIN B1              | 3142.9688 |
| 1769 | U58032_at_GI_28872760-A        | Myotubularin related protein 1 (MTMR1)     | 3142.9915 |
| 1770 | U37022_rna1_at_GI_16936532-A   | Cyclin-dependent kinase 4 (CDK4) gene      | 3143.0505 |
| 1771 | L13800_at_GI_34222302-S        | Liver expressed protein gene, 3' end       | 3143.3518 |
| 1772 | L14787_at_GI_42476268-S        | DNA-binding protein mRNA, 3'end            | 3143.4595 |
| 1773 | U18242_at_GI_18105008-S        | CAMLG Calcium modulating ligand            | 3143.9158 |
| 1774 | D87685_at_GI_7662017-S         | KIAA0244 gene, partial cds                 | 3143.9944 |
| 1775 | AA418341_at_GI_33620778-S      | EST: zv96d05.r1 Soares NhHMPu S1           | 3144.2234 |
| 1776 | RC_AA053508_at_NA_illumina     | EST: zl73a02.s1 Stratagene colon           | 3144.4023 |
| 1777 | RC_AA227915_at_NA_illumina     | EST: zr57f06.s1 Soares NhHMPu S1           | 3144.6433 |
| 1778 | AA446512_at_NA_illumina        | Zw67d05.r1 Soares testis NHT Homo          | 3144.9343 |
| 1779 | Z21325_at_GI_19743810-S        | EST: H. sapiens putatively transcribed     | 3145.595  |
| 1780 | U72882_s_at_NA_illumina        | Interferon-induced leucine zipper protein  | 3145.8408 |
| 1781 | RC_AA214090_at_NA_illumina     | EST: zn58h01.s1 Stratagene muscle          | 3146.2002 |
| 1782 | M27504_s_at_GI_19913407-S      | Topoisomerase type II (Topo II) mRNA,      | 3146.2007 |
| 1783 | M60830_at_GI_20070234-S        | EVI2B PROTEIN PRECURSOR TROPIC             | 3146.207  |
| 1784 | U75370_at_GI_14790137-S        | Mitochondrial RNA polymerase mRNA,         | 3146.812  |
| 1785 | RC_AA621449_at_NA_illumina     | EST: af36h05.s1 Soares total fetus         | 3147.2654 |
| 1786 | R60523_s_at_GI_34098958-S      | EST: yh13f11.r1 Homo sapiens cDNA          | 3147.486  |
| 1787 | AA312994_at_GI_37550609-S      | EST: EST183781 Bone VII Homo sapiens       | 3147.6045 |
| 1788 | RC_AA215409_at_NA_illumina     | EST: zr94h02.s1 NCI_CGAP_GCB1 Homo         | 3148.2036 |
| 1789 | RC_AA437393_at_NA_illumina     | EST: zw25h10.s1 Soares ovary tumor         | 3148.3735 |
| 1790 | RC_AA242868_at_GI_11641288-S   | EST: zr25g05.s1 Stratagene NT2 neuronal    | 3148.504  |
| 1791 | S76756_s_at_GI_14195617-A      | 4R-MAP2=microtubule-associated protein     | 3148.584  |
| 1792 | M74587_rna1_s_at_GI_4504614-S  | Insulin-like growth factor binding protein | 3148.6414 |
| 1793 | M81118_at_GI_11496890-S        | ADH5 Alcohol dehydrogenase 5 chi           | 3148.682  |
| 1794 | RC_AA027317_at_NA_illumina     | EST: ze97d11.s1 Soares fetal heart         | 3148.6863 |

|      |                              |                                            |           |
|------|------------------------------|--------------------------------------------|-----------|
| 1795 | X63468_at_GI_5031726-S       | GTF2E1 General transcription factor TFIIE  | 3148.7239 |
| 1796 | S76965_at_GI_32483385-A      | Protein kinase inhibitor [human,           | 3148.8408 |
| 1797 | X82494_at_GI_4503664-S       | FBLN2 Fibulin 2                            | 3148.9111 |
| 1798 | RC_C20976_at_GI_17017971-S   | EST: HUMGS0002448, Human Gene              | 3148.94   |
| 1799 | S41458_at_GI_4505668-S       | PDE6B Phosphodiesterase 6B, cGMP-          | 3148.9854 |
| 1800 | U57629_at_GI_4506580-S       | Retinitis pigmentosa GTPase regulator      | 3149.445  |
| 1801 | RC_AA481068_at_NA_illumina   | EST: aa29e10.s1 NCI_CGAP_GCB1              | 3149.457  |
| 1802 | U47621_at_GI_39812427-S      | Nucleolar autoantigen No55 mRNA            | 3149.5806 |
| 1803 | U73737_at_GI_4504190-S       | GTBP DNA G/T mismatch-binding protein      | 3149.7656 |
| 1804 | N87513_at_GI_38787903-A      | Homo sapiens HRIHFB2017 mRNA,              | 3149.8323 |
| 1805 | W27611_at_NA_illumina        | Splicing factor proline/glutamine rich     | 3149.8438 |
| 1806 | W27810_at_GI_41152071-S      | EST: 38a8 Human retina cDNA randomly       | 3149.981  |
| 1807 | HG4109-HT4379_at_NA_illumina | Olfactory Receptor Or17-30                 | 3150.0632 |
| 1808 | U38545_at_GI_4505872-S       | ARF-activated phosphatidylcholine-specific | 3150.2498 |
| 1809 | U85267_at_NA_illumina        | Down syndrome candidate region 1           | 3150.3472 |
| 1810 | RC_AA459686_at_GI_24475727-S | EST: zx49d11.s1 Soares testis NHT Homo     | 3150.4363 |
| 1811 | X81889_at_GI_6806894-S       | P0071 protein                              | 3151.0059 |
| 1812 | T93641_at_NA_illumina        | EST: ye05a10.r1 Homo sapiens cDNA          | 3151.2014 |
| 1813 | D28589_at_GI_37540431-S      | mRNA (KIAA00167), partial sequence         | 3151.2263 |
| 1814 | U87964_at_GI_23065570-S      | Putative G-protein (GP-1) mRNA             | 3151.3823 |
| 1815 | W15618_at_NA_illumina        | EST: zb05f07.r1 Soares fetal lung          | 3152.1855 |
| 1816 | HG3415-HT3598_at_NA_illumina | Poliovirus Receptor                        | 3152.3977 |
| 1817 | W29115_at_NA_illumina        | EST: 56e8 Human retina cDNA randomly       | 3152.4326 |
| 1818 | H26812_at_NA_illumina        | EST: yl63d06.r1 Homo sapiens cDNA          | 3152.5796 |
| 1819 | S75295_at_GI_4504894-S       | Nucleoprotein interactor 1                 | 3152.8667 |
| 1820 | D45917_s_at_GI_21536431-S    | TIMP-3, partial cds (C-terminus region)    | 3152.8757 |
| 1821 | AA255918_at_GI_15011917-S    | Homo sapiens mRNA for putative vacuolar    | 3152.9385 |
| 1822 | RC_AA234440_at_NA_illumina   | EST: zr74f03.s1 Soares NhHMPu S1           | 3152.9902 |
| 1823 | RC_AA477250_at_NA_illumina   | EST: zu29h09.s1 Soares ovary tumor         | 3153.0012 |
| 1824 | W73663_at_GI_21237782-S      | EST: zd55e07.r1 Soares fetal heart         | 3153.1206 |
| 1825 | M55153_at_GI_39777598-I      | PROTEIN-GLUTAMINE GAMMA-                   | 3153.2983 |
| 1826 | AD001527_cds1_at_NA_illumina | Comment for location 3447-3655: BLASTX     | 3153.3838 |
| 1827 | U85430_at_NA_illumina        | Transcription factor NFATx4 mRNA           | 3153.5566 |
| 1828 | U58090_at_GI_11140810-S      | Hs-cul-4A mRNA, partial cds                | 3154.4753 |
| 1829 | X06268_at_NA_illumina        | COL2A1 Collagen, type II, alpha 1 (primary | 3154.4944 |
| 1830 | U63717_at_GI_38257156-S      | Osteoclast stimulating factor mRNA         | 3154.8354 |
| 1831 | AA082561_s_at_NA_illumina    | Zn24b11.r1 Stratagene neuroepithelium      | 3155.0427 |
| 1832 | RC_AA620504_at_NA_illumina   | EST: ae60d03.s1 Stratagene lung            | 3155.1958 |
| 1833 | U50531_at-2_NA_illumina      | Human BRCA2 region, mRNA sequence          | 3155.2898 |
| 1834 | U50531_at_NA_illumina        | BRCA2 region, mRNA sequence CG030          | 3155.2898 |
| 1835 | L17328_at_GI_7019372-S       | Pre-T/NK cell associated protein (3CI)     | 3155.417  |
| 1836 | AB002339_at_GI_37550421-S    | Human mRNA for KIAA0341 gene, partial      | 3155.421  |
| 1837 | RC_AA186804_at_GI_7657068-S  | EST: zp73h02.s1 Stratagene HeLa cell s3    | 3155.936  |

|      |                                |                                            |           |
|------|--------------------------------|--------------------------------------------|-----------|
| 1838 | RC_AA460281_at_NA_illumina     | EST: zx51a04.s1 Soares testis NHT Homo     | 3156.0205 |
| 1839 | HG37-HT37_at_NA_illumina       | Iron-Responsive Element-Binding Protein    | 3156.0535 |
| 1840 | AA419387_at_NA_illumina        | Zv01g04.r1 NCI_CGAP_GCB1 Homo              | 3156.4539 |
| 1841 | RC_AA136724_at_NA_illumina     | EST: zn96c04.s1 Stratagene fetal retina    | 3156.4934 |
| 1842 | HG2239-HT2324_r_at_NA_illumina | Potassium Channel Protein (Gb:Z11585)      | 3156.629  |
| 1843 | RC_AA031782_at_NA_illumina     | EST: zk17d05.s1 Soares pregnant uterus     | 3156.653  |
| 1844 | RC_AA002064_at_NA_illumina     | EST: zh85b03.s1 Soares fetal liver spleen  | 3157.0408 |
| 1845 | D49372_s_at_GI_22538399-S      | SCYA11 Small inducible cytokine A11        | 3157.1033 |
| 1846 | Z24724_at_NA_illumina          | PolyA site DNA                             | 3157.3308 |
| 1847 | U16031_at_GI_23397677-S        | Transcription factor IL-4 Stat mRNA        | 3157.525  |
| 1848 | M73047_at_GI_4507656-S         | TPP2 Tripeptidyl peptidase II              | 3157.7222 |
| 1849 | X60483_at_NA_illumina          | H4/d gene for H4 histone                   | 3157.7732 |
| 1850 | U81006_at_GI_4758873-S         | P76 mRNA                                   | 3158.1594 |
| 1851 | T85556_at_NA_illumina          | EST: yd82c09.r1 Homo sapiens cDNA          | 3159.1038 |
| 1852 | W04902_at_NA_illumina          | EST: za43a11.r1 Soares fetal liver spleen  | 3159.1257 |
| 1853 | U23850_s_at_NA_illumina        | Type 1 inositol 1,4,5-trisphosphate        | 3159.2136 |
| 1854 | L44497_at_GI_19923363-S        | Small inducible cytokine A5 (RANTES)       | 3160.0837 |
| 1855 | RC_AA417915_at_NA_illumina     | EST: zv94a08.s1 Soares NhHMPu S1           | 3160.2988 |
| 1856 | D79983_at_GI_38045937-S        | KIAA0161 gene                              | 3160.2996 |
| 1857 | U48807_at_GI_34328908-A        | Dual specific protein phosphatase mRNA     | 3160.7073 |
| 1858 | RC_AA398090_at_NA_illumina     | Homo sapiens CG1 mRNA, complete cds        | 3160.7336 |
| 1859 | L15309_at_GI_4507992-S         | ZNF141 Zinc finger protein 141 (clone pHZ- | 3160.887  |
| 1860 | X94612_at_GI_5453977-S         | Type II cGMP-dependent protein kinase      | 3160.94   |
| 1861 | W16574_at_NA_illumina          | Zb13f09.r1 Soares fetal lung NbHL19W       | 3161.1575 |
| 1862 | W28610_at_NA_illumina          | EST: 49b12 Human retina cDNA randomly      | 3161.2405 |
| 1863 | U09087_s_at_GI_4507554-S       | Thymopoietin beta mRNA                     | 3161.261  |
| 1864 | M82882_at_GI_34222093-S        | ETS-RELATED TRANSCRIPTION                  | 3161.2625 |
| 1865 | S78432_xpt1_at_NA_illumina     | Un-named-transcript-1 from                 | 3161.2947 |
| 1866 | M77142_at_GI_11863160-A        | NUCLEOLYSIN TIA-1                          | 3161.4453 |
| 1867 | X98507_at_GI_24415399-S        | Myosin-I beta                              | 3161.4678 |
| 1868 | X85237_at_GI_34147572-S        | Splicing factor SF3a120                    | 3161.5576 |
| 1869 | RC_AA432256_at_NA_illumina     | EST: zw78c06.s1 Soares testis NHT          | 3161.6958 |
| 1870 | D87969_at_GI_20149579-S        | CMP-sialic acid transporter                | 3161.955  |
| 1871 | U28281_at_GI_4506824-S         | SCTR Secretin receptor                     | 3162.125  |
| 1872 | AA379451_s_at_NA_illumina      | Homo sapiens PCAF associated factor 65     | 3162.1604 |
| 1873 | Z78289_at_NA_illumina          | Z78289 Homo sapiens brain fetus Homo       | 3162.1636 |
| 1874 | HG4518-HT4921_r_at_NA_illumina | Transcription Factor Btf3 Homolog          | 3162.3604 |
| 1875 | U83303_cds2_at_GI_4506850-S    | GCP-2 gene (granulocyte chemotactic        | 3162.5022 |
| 1876 | M91669_s_at_GI_18641355-A      | Bullous pemphigoid autoantigen BP180       | 3162.636  |
| 1877 | M17236_at_NA_illumina          | HLA CLASS II HISTOCOMPATIBILITY            | 3163.0186 |
| 1878 | H84261_at_NA_illumina          | Ys96d12.r1 Homo sapiens cDNA clone         | 3163.115  |
| 1879 | YEL021w/URA3_at_NA_illumina    | No info for gene                           | 3163.1587 |
| 1880 | Y10262_s_at_GI_26667245-A      | EYA3 gene                                  | 3163.198  |

|      |                                |                                            |           |
|------|--------------------------------|--------------------------------------------|-----------|
| 1881 | M90696_at_GI_23110961-S        | CTSS Cathepsin S                           | 3163.8354 |
| 1882 | M63589_at_GI_4507362-S         | TAL1 T-cell acute lymphocytic leukemia 1   | 3163.999  |
| 1883 | RC_AA397904_at_NA_illumina     | EST: zt58a01.s1 Soares testis NHT Homo     | 3164.0515 |
| 1884 | U45974_at_GI_38327538-S        | Phosphatidylinositol (4,5) bisphosphate 5- | 3164.1821 |
| 1885 | U44754_at_GI_19923159-S        | PSE-binding factor PTF gamma subunit       | 3164.3696 |
| 1886 | X77567_s_at_GI_38327536-S      | InsP3 5-phosphatase                        | 3164.6309 |
| 1887 | U51166_at_GI_32189389-S        | G/T mismatch-specific thymine DNA          | 3164.7112 |
| 1888 | RC_AA464741_at_GI_34222345-S   | EST: zx86b07.s1 Soares ovary tumor         | 3164.7732 |
| 1889 | X84002_at_GI_9943840-S         | TAFII20 mRNA for transcription factor      | 3164.801  |
| 1890 | U15655_at_GI_5729813-S         | Ets domain protein ERF mRNA                | 3164.9424 |
| 1891 | Z29574_at_GI_23238191-S        | BCMA B cell maturation factor              | 3165.2888 |
| 1892 | D50692_at_GI_8850230-S         | C-myc binding protein                      | 3165.4124 |
| 1893 | RC_AA132172_at_NA_illumina     | EST: zo27f10.s1 Stratagene colon           | 3165.4297 |
| 1894 | M31520_rna1_at_GI_15011937-S   | Unknown protein gene extracted from        | 3165.472  |
| 1895 | AA235956_at_GI_22095383-S      | EST: zs40h09.r1 Soares NhHMPu S1           | 3165.5957 |
| 1896 | D85433_at_GI_22749078-S        | MURR1 mRNA, sequence                       | 3165.7878 |
| 1897 | D50924_at_GI_38158021-A        | KIAA0134 gene                              | 3165.9587 |
| 1898 | D63482_at_GI_21237793-A        | KIAA0148 gene                              | 3166.1606 |
| 1899 | M26692_s_at_GI_20428651-S      | Lymphocyte-specific protein tyrosine       | 3166.2224 |
| 1900 | HG2999-HT4756_s_at_NA_illumina | Thyroid Peroxidase, Alt. Splice 2          | 3166.2517 |
| 1901 | AA343881_at_GI_22325376-A      | SudD (suppressor of bimD6, Aspergillus     | 3166.4397 |
| 1902 | RC_AA282263_at_NA_illumina     | EST: zt13g03.s1 NCI_CGAP_GCB1 Homo         | 3166.599  |
| 1903 | U71601_at_GI_24308296-S        | Zinc finger protein zfp47 (zf47) mRNA,     | 3166.6418 |
| 1904 | H16436_at_GI_13376346-S        | Ym22h02.r1 Homo sapiens cDNA clone         | 3166.6833 |
| 1905 | AA398043_at_GI_42544183-S      | EST: zt89c11.r1 Soares testis NHT Homo     | 3166.7334 |
| 1906 | RC_AA243709_at_NA_illumina     | EST: zr67h08.s1 Soares NhHMPu S1           | 3166.7366 |
| 1907 | K02268_at_GI_32483402-S        | BETA-NEOENDORPHIN-DYNORPHIN                | 3167.1648 |
| 1908 | RC_AA424817_s_at_NA_illumina   | EST: zw04b08.s1 Soares NhHMPu S1           | 3167.2202 |
| 1909 | X79683_s_at_GI_9845495-S       | LAMB2 Laminin, beta 2 (laminin S)          | 3167.2273 |
| 1910 | RC_D59931_s_at_NA_illumina     | EST: Human fetal brain cDNA 3'-end GEN-    | 3167.472  |
| 1911 | X61755_rna1_s_at_GI_24497541-S | HOX3D gene for homeoprotein HOX3D          | 3167.6543 |
| 1912 | AA147144_at_GI_21536425-A      | Zo32c06.r1 Stratagene colon (#937204)      | 3167.8032 |
| 1913 | U18237_at_GI_9961243-S         | ATP-binding cassette protein mRNA          | 3167.821  |
| 1914 | H59682_s_at_GI_27754148-S      | Yr35h02.r1 Soares fetal liver spleen       | 3167.848  |
| 1915 | X59842_rna1_s_at_GI_27436886-S | PBX2 mRNA                                  | 3167.9702 |
| 1916 | L11369_at_GI_27754770-A        | Protocadherin 42 mRNA, 3' end of cds for   | 3168.0137 |
| 1917 | AA281229_at_GI_21687267-S      | EST: zs94c12.r1 NCI_CGAP_GCB1 Homo         | 3168.1777 |
| 1918 | U15174_at_GI_7669480-S         | Nip3 (NIP3) mRNA                           | 3168.6836 |
| 1919 | X97065_at_GI_16905502-A        | Sec23B isoform, 2450bp                     | 3168.6885 |
| 1920 | Y00636_at_GI_4502676-S         | CD58 CD58 antigen, (lymphocyte function-   | 3168.8052 |
| 1921 | D50914_at_GI_40353770-S        | KIAA0124 gene, partial cds                 | 3168.9968 |
| 1922 | H71514_at_GI_38570155-S        | EST: ys11c12.r1 Homo sapiens cDNA          | 3169.083  |
| 1923 | L23852_at_NA_illumina          | (clone Z146) retinal mRNA, 3' end and      | 3169.226  |

|      |                               |                                            |           |
|------|-------------------------------|--------------------------------------------|-----------|
| 1924 | M28439_at_GI_24430191-S       | KERATIN, TYPE I CYTOSKELETAL 17            | 3169.422  |
| 1925 | U49020_cds2_s_at_GI_5031906-S | MEF2A gene (myocyte-specific enhancer      | 3169.5955 |
| 1926 | AB003103_at_GI_28872764-A     | Proteasome subunit p55                     | 3169.8152 |
| 1927 | D31716_at_NA_illumina         | GC box bindig protein                      | 3169.8452 |
| 1928 | AA490691_at_GI_23510367-S     | EST: aa45b09.r1 Soares NhHMPu S1           | 3170.1033 |
| 1929 | U35459_at_GI_4826901-S        | Bomapin mRNA                               | 3170.244  |
| 1930 | AFFX-                         | AFFX-HUMGAPDH/M33197_5_st                  | 3170.8096 |
| 1931 | AFFX-HUMGAPDH/M33197_5_st-    | Glyceraldehyde-3-phosphate                 | 3170.8096 |
| 1932 | M84820_s_at_GI_27436942-S     | RETINOIC ACID RECEPTOR RXR-BETA            | 3170.8416 |
| 1933 | U66616_at_GI_21237807-A       | SWI/SNF complex 170 KDa subunit            | 3170.8716 |
| 1934 | U41815_at_GI_21264368-A       | Nucleoporin 98 (NUP98) mRNA                | 3171.0842 |
| 1935 | M80359_at_GI_23346413-S       | PUTATIVE SERINE/THREONINE-                 | 3171.3972 |
| 1936 | AA479127_at_GI_11141892-S     | EST: zv20b10.r1 Soares NhHMPu S1           | 3172.0215 |
| 1937 | HG1103-HT1103_at_NA_illumina  | Guanine Nucleotide-Binding Protein Ral,    | 3172.0388 |
| 1938 | HG2465-HT4871_at_NA_illumina  | Dna-Binding Protein Ap-2, Alt. Splice 3    | 3172.2207 |
| 1939 | M57423_f_at_GI_31343499-S     | RIBOSE-PHOSPHATE                           | 3172.3267 |
| 1940 | M57423_f_at-2_NA_illumina     | RIBOSE-PHOSPHATE                           | 3172.3267 |
| 1941 | D79565_at_NA_illumina         | Human aorta cDNA 5'-end GEN-281C02,        | 3172.481  |
| 1942 | AA476991_at_NA_illumina       | EST: zu31d11.r1 Soares ovary tumor         | 3172.49   |
| 1943 | X99393_s_at_NA_illumina       | CMKBR5 gene, non-functional mutant         | 3172.6765 |
| 1944 | RC_AA418878_at_NA_illumina    | EST: zv98g08.s1 Soares NhHMPu S1           | 3173.3691 |
| 1945 | U94353_at_NA_illumina         | Radical fringe (Drosophila) homolog        | 3173.445  |
| 1946 | AA055266_at_NA_illumina       | Lysyl oxidase                              | 3173.465  |
| 1947 | L37036_s_at_GI_41872613-S     | NEUTROPHIL ACTIVATING PROTEIN              | 3173.5933 |
| 1948 | AA287864_at_NA_illumina       | Janus kinase 1 (a protein tyrosine kinase) | 3174.0085 |
| 1949 | RC_AA062731_at_GI_4827039-S   | EST: zm01h03.s1 Stratagene corneal         | 3174.0515 |
| 1950 | J05682_at_GI_19913430-S       | ATP6D ATPase, H+ transporting,             | 3174.0947 |
| 1951 | RC_AA437227_at_NA_illumina    | EST: zv54c02.s1 Soares testis NHT Homo     | 3174.273  |
| 1952 | AA444387_at_GI_21314766-S     | EST: zv76e11.r1 Soares total fetus         | 3174.2822 |
| 1953 | Z50053_at_GI_4504210-S        | GUC1A2 Guanylate cyclase 1, soluble,       | 3174.972  |
| 1954 | RC_AA278134_at_NA_illumina    | EST: zt08f12.s1 NCI_CGAP_GCB1 Homo         | 3175.1174 |
| 1955 | AA062932_at_NA_illumina       | Homo sapiens mRNA for GNAS1 protein        | 3175.138  |
| 1956 | D63813_at_GI_40316929-A       | Rod photoreceptor protein                  | 3175.2566 |
| 1957 | U52370_s_at_NA_illumina       | Fertilin beta (a disintegrin and           | 3175.2869 |
| 1958 | L11701_s_at_GI_29171718-A     | Phospholipase D mRNA                       | 3175.517  |
| 1959 | U36501_at_GI_19923235-S       | SP100 Nuclear antigen Sp100                | 3176.1165 |
| 1960 | AA310850_at_GI_42659928-S     | EST: EST181766 Jurkat T-cells V Homo       | 3176.2493 |
| 1961 | X83543_at_GI_18375508-S       | APXL Apical protein (Xenopus laevis-like)  | 3176.2573 |
| 1962 | RC_AA600123_at_NA_illumina    | EST: ae50b02.s1 Stratagene lung            | 3176.3298 |
| 1963 | AA203428_at_GI_28605136-A     | Proteasome (prosome, macropain) 26S        | 3176.3948 |
| 1964 | U44799_s_at_GI_31077202-A     | U1-snRNP binding protein homolog mRNA      | 3176.4497 |
| 1965 | U23435_s_at_GI_31541784-S     | Abl interactor 2 (Abi-2) mRNA              | 3176.8035 |
| 1966 | X76057_at_GI_4505234-S        | MPI Mannose phosphate isomerase            | 3176.8198 |

|      |                                |                                           |           |
|------|--------------------------------|-------------------------------------------|-----------|
| 1967 | U18467_at_NA_illumina          | PSG7 Pregnancy-specific beta 1-           | 3176.9302 |
| 1968 | RC_AA004549_at_NA_illumina     | EST: zh91h11.s1 Soares fetal liver spleen | 3178.01   |
| 1969 | HG2730-HT2827_s_at_NA_illumina | Fibrinogen, A Alpha Polypeptide, Alt.     | 3178.4224 |
| 1970 | S71129_at_NA_illumina          | Acetylcholinesterase {I4-E5 doman}        | 3178.5408 |
| 1971 | U79270_at_GI_17921983-S        | Clone 23707 mRNA, partial cds             | 3178.6553 |
| 1972 | M34344_at_NA_illumina          | ITGA2B Integrin, alpha 2b (platelet       | 3178.7861 |
| 1973 | RC_AA458655_at_NA_illumina     | Carboxypeptidase D                        | 3178.8438 |
| 1974 | M22638_at_GI_34147557-S        | LYL-1 protein gene                        | 3178.9272 |
| 1975 | HG3432-HT3618_at_NA_illumina   | Fibroblast Growth Factor Receptor K-Sam,  | 3178.9702 |
| 1976 | RC_AA233369_at_NA_illumina     | EST: zr48e12.s1 Soares NhHMPu S1          | 3178.975  |
| 1977 | X85781_s_at_NA_illumina        | NOS2 gene, exon 27                        | 3179.1226 |
| 1978 | U55209_at_NA_illumina          | Myosin VIIa transcript 2 mRNA             | 3179.7285 |
| 1979 | M13994_s_at_GI_4557354-I       | BCL2 B-cell CLL/lymphoma 2                | 3179.8176 |
| 1980 | U80017_rna2_at_GI_4758751-S    | Naip gene (neuronal apoptosis inhibitory  | 3179.9548 |
| 1981 | L27476_at_GI_42518069-S        | X104 mRNA                                 | 3179.9756 |
| 1982 | RC_AA598712_at_GI_34147590-S   | EST: ae49d06.s1 Stratagene lung           | 3180.2683 |
| 1983 | U40705_at_GI_9257244-A         | Telomeric repeat binding factor (TRF1)    | 3180.5889 |
| 1984 | L19401_at_GI_10835118-S        | MYO5A Myosin VA (heavy polypeptide 12,    | 3180.6582 |
| 1985 | X81372_at_GI_4757861-S         | Biphenyl hydrolase-related protein        | 3180.7615 |
| 1986 | U66615_at_GI_21237801-S        | SWI/SNF complex 155 KDa subunit           | 3180.7766 |
| 1987 | L34600_at_GI_4505276-S         | INITIATION FACTOR IF-2,                   | 3180.9512 |
| 1988 | U86602_at_GI_5803110-S         | Nucleolar protein p40 mRNA                | 3181.1658 |
| 1989 | HG4318-HT4588_s_at_NA_illumina | Lim-Domain Transcription Factor Lim-1     | 3181.1736 |
| 1990 | N94146_at_NA_illumina          | EST: za25b12.r1 Homo sapiens cDNA         | 3181.355  |
| 1991 | U30246_at-2_NA_illumina        | Solute carrier family 12                  | 3181.4036 |
| 1992 | U30246_at_GI_38569461-S        | Bumetanide-sensitive Na-K-Cl              | 3181.4036 |
| 1993 | X66436_at_GI_38788318-S        | POSSIBLE GTP-BINDING PROTEIN              | 3181.4172 |
| 1994 | U07807_at_GI_14269577-S        | Metallothionein IV (MTIV) gene            | 3181.5093 |
| 1995 | RC_AA400909_at_NA_illumina     | KIAA0451 gene product                     | 3181.7803 |
| 1996 | AA047344_at_NA_illumina        | EST: zl65f10.r1 Stratagene colon          | 3181.8442 |
| 1997 | D21851_at_GI_41352689-S        | KIAA0028 gene, partial cds                | 3182.1558 |
| 1998 | U71374_at_GI_4505722-S         | HsPex13p mRNA                             | 3182.3506 |
| 1999 | D58189_s_at_GI_31542314-S      | EST: Human aorta cDNA 5'-end GEN-         | 3182.5405 |
| 2000 | HG4068-HT4338_at_NA_illumina   | Phosphoprotein Tal2                       | 3182.6262 |
| 2001 | RC_AA152408_at_GI_41281582-S   | Homo sapiens KIAA0433 mRNA, partial       | 3183.036  |
| 2002 | U07151_at_GI_38569402-S        | GTP binding protein (ARL3) mRNA           | 3183.0535 |
| 2003 | Z68747_at_GI_16950599-S        | Imogen 38                                 | 3183.2817 |
| 2004 | S66427_at_NA_illumina          | RBBP1 Retinoblastoma-binding protein      | 3183.5383 |
| 2005 | H75570_at_NA_illumina          | EST: yu05c01.r1 Homo sapiens cDNA         | 3183.649  |
| 2006 | X89894_at_NA_illumina          | Nuclear receptor                          | 3183.6577 |
| 2007 | M13928_s_at_GI_38569424-S      | DELTA-AMINOLEVULINIC ACID                 | 3183.905  |
| 2008 | R53779_at_GI_41281787-I        | EST: yi02f09.r1 Homo sapiens cDNA clone   | 3184.3347 |
| 2009 | D10523_at_GI_4505492-S         | OGDH Oxoglutarate dehydrogenase           | 3184.385  |

|      |                              |                                              |           |
|------|------------------------------|----------------------------------------------|-----------|
| 2010 | U73682_at_NA_illumina        | Meningioma-expressed antigen 6 (MEA6)        | 3184.4011 |
| 2011 | RC_AA424016_at_NA_illumina   | EST: zv80b05.s1 Soares total fetus           | 3184.4373 |
| 2012 | M13194_at_GI_42544170-A      | ERCC1 Excision repair cross-                 | 3184.488  |
| 2013 | AA233225_at_GI_39995063-S    | EST: zr69c05.r1 Soares NhHMPu S1             | 3184.9272 |
| 2014 | AA114183_at_GI_19263339-S    | EST: zn75a05.r1 Stratagene NT2 neuronal      | 3184.9512 |
| 2015 | U66661_at_GI_12707559-A      | GABA-A receptor epsilon subunit mRNA         | 3184.9592 |
| 2016 | RC_AA600310_at_GI_22202630-A | EST: ag04b04.s1 Gessler Wilms tumor          | 3185.1145 |
| 2017 | AB002309_at_NA_illumina      | A-kinase anchor protein 100                  | 3185.2002 |
| 2018 | D79988_at_GI_41327744-S      | KIAA0166 gene                                | 3185.8328 |
| 2019 | M91487_at_NA_illumina        | EST: HUMRTPGEAF Homo sapiens                 | 3185.904  |
| 2020 | HG2715-HT2811_at_NA_illumina | Tyrosine Kinase (Gb:Z25437)                  | 3185.9138 |
| 2021 | X78549_at_GI_27886594-S      | Brk mRNA for tyrosine kinase                 | 3185.9358 |
| 2022 | M73489_at_GI_4826751-S       | Heat-stable enterotoxin receptor mRNA        | 3185.9744 |
| 2023 | W37660_at_NA_illumina        | EST: zc12e07.r1 Soares parathyroid tumor     | 3186.2153 |
| 2024 | M23197_at_GI_4502654-S       | CD33 CD33 antigen (differentiation           | 3186.3123 |
| 2025 | RC_AA423838_at_NA_illumina   | EST: zv79a11.s1 Soares total fetus           | 3186.3938 |
| 2026 | J04973_at_GI_4507842-S       | LGALS1 Ubiquinol-cytochrome c                | 3186.704  |
| 2027 | M28213_s_at_GI_4506364-S     | RAB2 RAB2, member RAS oncogene               | 3186.7412 |
| 2028 | M61826_s_at_NA_illumina      | SPECTRIN ALPHA CHAIN                         | 3186.7551 |
| 2029 | U20350_at_GI_19923135-S      | CMKRL1 Chemokine receptor-like 1             | 3186.759  |
| 2030 | RC_AA477643_s_at_NA_illumina | TIA1 cytotoxic granule-associated RNA-       | 3186.8164 |
| 2031 | S78798_s_at_GI_20302162-S    | 53K isoform of Type II phosphatidylinositol- | 3186.9558 |
| 2032 | U09607_at_GI_4557680-S       | JAK3 Janus kinase 3 (a protein tyrosine      | 3186.975  |
| 2033 | RC_AA292035_at_GI_19882236-S | EST: zt46a09.s1 Soares ovary tumor           | 3187.0696 |
| 2034 | Y00970_at_GI_4501876-S       | ACR Acrosin                                  | 3187.1165 |
| 2035 | AB002377_at_NA_illumina      | Human mRNA for KIAA0379 gene, partial        | 3187.2126 |
| 2036 | N81167_s_at_NA_illumina      | EST: yw36d06.r1 Homo sapiens cDNA            | 3187.371  |
| 2037 | RC_AA286714_at_NA_illumina   | EST: zs54e06.s1 NCI_CGAP_GCB1                | 3187.5876 |
| 2038 | U07563_cds1_at_NA_illumina   | ABL gene, exon 1b and intron 1b, and         | 3187.733  |
| 2039 | U07563_cds1_at-2_NA_illumina | V-abl Abelson murine leukemia viral          | 3187.733  |
| 2040 | X52896_s_at_NA_illumina      | RNA for dermal fibroblast elastin            | 3187.7695 |
| 2041 | AA278632_at_GI_6382080-S     | Homo sapiens calcium and DAG-regulated       | 3187.8691 |
| 2042 | J00129_at_GI_11761630-S      | FIBRINOGEN BETA CHAIN                        | 3187.8691 |
| 2043 | RC_AA426065_at_NA_illumina   | EST: zv52a06.s1 Soares testis NHT Homo       | 3187.9067 |
| 2044 | L38933_rna1_at_NA_illumina   | The longest open reading frame predicts a    | 3187.9548 |
| 2045 | U33921_at_GI_5032032-S       | HSU33921 Clontech adult lung cDNA            | 3188.197  |
| 2046 | H14510_at_NA_illumina        | EST: ym18g10.r1 Homo sapiens cDNA            | 3188.3972 |
| 2047 | W73751_at_NA_illumina        | EST: zd52c12.r1 Soares fetal heart           | 3188.779  |
| 2048 | D12620_s_at-2_NA_illumina    | Cytochrome P450, subfamily IVF,              | 3188.8335 |
| 2049 | D12620_s_at_NA_illumina      | LTB4H Leukotriene B4 omega hydroxylase       | 3188.8335 |
| 2050 | U87972_at_GI_28178815-A      | NAD+-isocitrate dehydrogenase mRNA,          | 3188.9749 |
| 2051 | X86032_at_NA_illumina        | Peroxisomal acyl-CoA thioesterase            | 3189.0134 |
| 2052 | U93867_at_NA_illumina        | RNA polymerase III subunit (RPC62)           | 3189.073  |



|      |                              |                                             |           |
|------|------------------------------|---------------------------------------------|-----------|
| 2053 | U93867_at-2_NA_illumina      | Human RNA polymerase III subunit            | 3189.073  |
| 2054 | X98834_rna1_at_NA_illumina   | Zinc finger protein Hsal2 gene extracted    | 3189.25   |
| 2055 | L36818_at_GI_4755141-S       | INPPL1 Inositol polyphosphate               | 3189.292  |
| 2056 | RC_AA281760_at_GI_28329426-A | EST: zt07g10.s1 NCI_CGAP_GCB1 Homo          | 3189.3123 |
| 2057 | Y12393_s_at_GI_27477125-S    | RPLP2 Hemoglobin, beta                      | 3189.5825 |
| 2058 | D87937_at_GI_4503804-S       | Alpha(1,2)fucosyltransferase, 5'UTR partial | 3189.7234 |
| 2059 | AA456264_at_NA_illumina      | EST: zx99f01.r1 Soares NhHMPu S1            | 3189.8833 |
| 2060 | U17418_at_GI_39995096-S      | PARATHYROID                                 | 3190.1367 |
| 2061 | M33666_at_NA_illumina        | Pregnancy specific beta-1-glycoprotein 11   | 3190.1733 |
| 2062 | D38081_at_GI_42518081-I      | TBXA2R Thromboxane A2 receptor              | 3190.6533 |
| 2063 | D38081_at-2_NA_illumina      | Thromboxane A2 receptor                     | 3190.6533 |
| 2064 | AA287199_at_NA_illumina      | Human mRNA for KIAA0081 gene, partial       | 3190.7646 |
| 2065 | X95592_at_GI_27894372-A      | C1D protein                                 | 3190.8284 |
| 2066 | U96629_rna1_at_NA_illumina   | 2A8.2 gene (unknown protein)                | 3191.0396 |
| 2067 | RC_D59284_at_NA_illumina     | EST: Human fetal brain cDNA 3'-end GEN-     | 3191.274  |
| 2068 | N75204_s_at_NA_illumina      | EST: yw33e06.r1 Homo sapiens cDNA           | 3191.3186 |
| 2069 | AA453381_at_NA_illumina      | EST: zx47e08.r1 Soares testis NHT Homo      | 3191.5015 |
| 2070 | M30496_at_GI_37059734-S      | UBIQUITIN CARBOXYL-TERMINAL                 | 3191.6038 |
| 2071 | W04960_at_NA_illumina        | EST: za43d12.r1 Soares fetal liver spleen   | 3191.6282 |
| 2072 | U79253_at_GI_7661835-S       | Clone 23893 mRNA                            | 3192.0024 |
| 2073 | D31111_at_GI_8922889-S       | EST: Human fetal-lung cDNA 5'-end           | 3192.3135 |
| 2074 | RC_AA255544_at_NA_illumina   | EST: zr85c10.s1 Soares NhHMPu S1            | 3192.4155 |
| 2075 | R67128_at_NA_illumina        | KIAA0331 gene product                       | 3192.4968 |
| 2076 | M14636_at_GI_42476165-S      | PYGL Glycogen phosphorylase L (liver        | 3192.639  |
| 2077 | X98176_at_NA_illumina        | MACH-alpha-2 protein                        | 3192.6575 |
| 2078 | HG4390-HT4660_at_NA_illumina | Ribosomal Protein L18a Homolog              | 3192.6685 |
| 2079 | L44367_at_NA_illumina        | EST: Homo sapiens thymus mRNA               | 3192.8435 |
| 2080 | RC_AA402443_at_NA_illumina   | EST: zt65e10.s1 Soares testis NHT Homo      | 3193.256  |
| 2081 | HG3517-HT3711_at_NA_illumina | Alpha-1-Antitrypsin, 5' End                 | 3193.384  |
| 2082 | M10051_s_at_GI_4557883-S     | INSR Insulin receptor                       | 3193.4827 |
| 2083 | U22028_r_at_NA_illumina      | Cytochrome P450 (CYP2A13) gene              | 3193.988  |
| 2084 | D78156_at_GI_12545407-S      | RasGTPase activating protein, partial cds   | 3194.183  |
| 2085 | X76061_at_GI_21361291-S      | P130 mRNA for 130K protein                  | 3194.4233 |
| 2086 | RC_AA464606_at_NA_illumina   | EST: aa11g01.s1 Soares NhHMPu S1            | 3194.7578 |
| 2087 | D63881_at_NA_illumina        | KIAA0160 gene, partial cds                  | 3194.759  |
| 2088 | HG732-HT732_at_NA_illumina   | Serum Amyloid A1                            | 3194.7732 |
| 2089 | L43338_at_NA_illumina        | (clone JJ1a) cadherin mRNA fragment         | 3195.3723 |
| 2090 | M64590_at_GI_4504012-S       | GLDC Glycine cleavage system protein P      | 3195.4504 |
| 2091 | AA203147_at_GI_28827777-S    | EST: zx57d05.r1 Soares fetal liver spleen   | 3195.7153 |
| 2092 | X65644_at_GI_19923373-S      | IMMUNODEFICIENCY VIRUS TYPE I               | 3196.029  |
| 2093 | U48736_at_GI_28872758-A      | Serine/threonine-protein kinase PRP4h       | 3196.397  |
| 2094 | S66793_at_GI_4757775-S       | ARR3 Arrestin 3, retinal (X-arrestin)       | 3197.3455 |
| 2095 | RC_AA436149_at_NA_illumina   | EST: zv22b03.s1 Soares NhHMPu S1            | 3197.5386 |

|      |                              |                                              |           |
|------|------------------------------|----------------------------------------------|-----------|
| 2096 | X63657_at_GI_4503816-S       | FVT1 Follicular lymphoma variant             | 3197.5676 |
| 2097 | AA477288_at_NA_illumina      | EST: zu43f11.r1 Soares ovary tumor           | 3197.8894 |
| 2098 | D82557_at_NA_illumina        | EST: similar to none, mRNA sequence.         | 3198.0352 |
| 2099 | RC_AA019715_at_NA_illumina   | EST: ze62b03.s1 Soares retina N2b4HR         | 3198.1106 |
| 2100 | RC_AA236397_at_GI_31542748-S | EST: zr54g03.s1 Soares NhHMPu S1             | 3199.018  |
| 2101 | RC_AA256326_at_NA_illumina   | EST: zr80f08.s1 Soares NhHMPu S1             | 3199.3384 |
| 2102 | AA249538_at_GI_38093642-S    | EST: jj6896.seq.F Human fetal heart,         | 3199.4927 |
| 2103 | U82256_at_GI_10947110-S      | ARG2 Arginase, type II (non-hepatic)         | 3199.5317 |
| 2104 | L44447_at_GI_21314754-S      | EST: Homo sapiens thymus mRNA                | 3199.695  |
| 2105 | L10125_s_at_NA_illumina      | Human serine/threonine kinase receptor-2-    | 3199.7705 |
| 2106 | U74382_s_at_NA_illumina      | Telomeric repeat binding factor (TRF1)       | 3199.8513 |
| 2107 | N78220_at_NA_illumina        | Homo sapiens clone 23785 mRNA                | 3200.1907 |
| 2108 | RC_AA411984_at_GI_25914753-A | EST: zt65g07.s1 Soares testis NHT Homo       | 3200.263  |
| 2109 | D87743_at_GI_5454069-S       | KIAA0267 gene, partial cds                   | 3200.297  |
| 2110 | W87313_at_GI_19923494-S      | EST: zh64d02.r1 Soares fetal liver spleen    | 3200.816  |
| 2111 | M86546_at_GI_4505622-S       | PBX1 PBX1a and PBX1b                         | 3201.1338 |
| 2112 | AA309871_at_NA_illumina      | H.sapiens mRNA for M-phase                   | 3201.225  |
| 2113 | RC_AA115979_at_GI_5453631-S  | EST: zm78e11.s1 Stratagene                   | 3201.3188 |
| 2114 | RC_AA256994_at_GI_41327772-S | EST: zr81h10.s1 Soares NhHMPu S1             | 3201.3308 |
| 2115 | D63390_at-2_NA_illumina      | Platelet-activating factor acetylhydrolase,  | 3201.4417 |
| 2116 | D63390_at_GI_4505584-S       | Acetylhydrolase IB beta-subunit              | 3201.4417 |
| 2117 | U42031_at_GI_17149847-S      | 54 kDa progesterone receptor-associated      | 3201.5903 |
| 2118 | U95006_at_GI_21450710-S      | D9 splice variant A mRNA                     | 3201.7607 |
| 2119 | U41344_at_GI_41349452-S      | PRELP Proline arginine-rich end leucine-     | 3201.907  |
| 2120 | L14922_at-2_NA_illumina      | Replication factor C (activator 1) 1 (145kD) | 3202.1738 |
| 2121 | L14922_at_GI_32528305-S      | RFC1 Replication factor C (activator 1) 1    | 3202.1738 |
| 2122 | X53795_at_NA_illumina        | KAI1 Kangai 1 (suppression of                | 3202.449  |
| 2123 | Y07701_at_GI_15451906-S      | Ribosomal protein L5 pseudogene mRNA         | 3202.7236 |
| 2124 | L06139_at_GI_4557868-S       | TYROSINE-PROTEIN KINASE                      | 3203.16   |
| 2125 | L06139_at-2_NA_illumina      | TEK tyrosine kinase, endothelial             | 3203.16   |
| 2126 | S72904_at_GI_32528292-A      | APK1 antigen                                 | 3203.1816 |
| 2127 | RC_AA243700_at_GI_34147640-S | EST: zr68g08.s1 Soares NhHMPu S1             | 3203.3684 |
| 2128 | Z20674_at_NA_illumina        | EST: H. sapiens putatively transcribed       | 3204.0166 |
| 2129 | N80983_at_NA_illumina        | EST: za12e08.r1 Homo sapiens cDNA            | 3204.2927 |
| 2130 | D21262_at_GI_4758859-S       | KIAA0035 gene, partial cds                   | 3204.3115 |
| 2131 | X06745_at_GI_8393994-S       | DNA polymerase alpha-subunit                 | 3204.4958 |
| 2132 | M74525_at_GI_32967281-S      | UBE2B Ubiquitin-conjugating enzyme E2B       | 3204.501  |
| 2133 | X13255_at_GI_18426905-S      | DBH Dopamine beta-hydroxylase                | 3204.734  |
| 2134 | M60092_at_GI_4557310-S       | AMP DEAMINASE 1                              | 3204.8145 |
| 2135 | W27182_at_NA_illumina        | EST: 23d11 Human retina cDNA randomly        | 3204.9165 |
| 2136 | L36983_at_GI_4826699-S       | Dynamin (DNM) mRNA                           | 3205.1292 |
| 2137 | U51990_at-2_NA_illumina      | Pre-mRNA splicing factor similar to S.       | 3205.1614 |
| 2138 | U51990_at_GI_17999533-S      | HPrp18 mRNA                                  | 3205.1614 |

|      |                                |                                           |           |
|------|--------------------------------|-------------------------------------------|-----------|
| 2139 | Y07566_at_NA_illumina          | Rit mRNA                                  | 3205.247  |
| 2140 | U33429_at_GI_27436968-A        | K+ channel beta 2 subunit mRNA            | 3205.2761 |
| 2141 | N77495_at_NA_illumina          | EST: yv54b02.r1 Soares fetal liver spleen | 3205.352  |
| 2142 | D50855_s_at_GI_37577158-S      | CASR Calcium-sensing receptor             | 3205.4854 |
| 2143 | HG3242-HT3419_s_at_NA_illumina | Calcium Channel, Voltage-Gated, Alpha 1e  | 3205.569  |
| 2144 | AA496240_at_GI_22035561-S      | Zx70g11.r1 Soares total fetus Nb2HF8 9w   | 3205.7292 |
| 2145 | M54951_at_GI_23510318-S        | ATRIAL NATRIURETIC FACTOR                 | 3205.8567 |
| 2146 | RC_AA034407_at_NA_illumina     | EST: zk20h10.s1 Soares pregnant uterus    | 3205.8967 |
| 2147 | RC_AA427721_at_NA_illumina     | Homo sapiens TACC1 (TACC1) mRNA,          | 3206.0535 |
| 2148 | RC_AA227483_at_GI_22748864-S   | EST: zr18c08.s1 Stratagene NT2 neuronal   | 3206.2615 |
| 2149 | S74683_at_GI_4757783-S         | ADP-ribosyltransferase [human, skeletal   | 3206.3203 |
| 2150 | U40271_s_at_GI_27886606-A      | PTK7 Protein-tyrosine kinase 7            | 3206.6584 |
| 2151 | RC_AA456075_at_GI_14249707-A   | Lysozyme (renal amyloidosis)              | 3207.0127 |
| 2152 | L38608_at_GI_4502028-S         | ALCAM Activated leucocyte cell adhesion   | 3207.1724 |
| 2153 | AA248786_at_GI_4503128-S       | Homo sapiens alpha-catenin-like protein   | 3207.1726 |
| 2154 | N91071_s_at_NA_illumina        | EST: za17f10.r1 Soares fetal liver spleen | 3207.2017 |
| 2155 | U73167_cds7_at_NA_illumina     | H_LUCA14.6 gene extracted from Human      | 3207.2844 |
| 2156 | RC_AA599147_at_GI_14591918-S   | EST: ae52d08.s1 Stratagene lung           | 3207.3523 |
| 2157 | U68494_at_GI_14141725-S        | Hbc647 mRNA sequence                      | 3208.289  |
| 2158 | L13203_at-2_NA_illumina        | Human HNF-3/fork-head homolog-3 HFH-      | 3208.521  |
| 2159 | L13203_at_GI_21618328-A        | HNF-3/fork-head homolog-3 HFH-3 mRNA      | 3208.521  |
| 2160 | U49260_at_GI_4505288-S         | Mevalonate pyrophosphate decarboxylase    | 3208.6409 |
| 2161 | AA281694_at_GI_4826813-A       | EST: zt03d07.r1 NCI_CGAP_GCB1 Homo        | 3208.8208 |
| 2162 | H50752_at_GI_37551374-S        | EST: yp86d08.r1 Homo sapiens cDNA         | 3209.1243 |
| 2163 | D42063_at_GI_19718756-S        | RanBP2 (Ran-binding protein 2)            | 3209.2407 |
| 2164 | Z50749_at_GI_4506012-S         | Sds22-like mRNA                           | 3209.2686 |
| 2165 | AA444100_s_at_NA_illumina      | EST: zv46h07.r1 Soares ovary tumor        | 3209.2944 |
| 2166 | S76638_at_GI_19923222-S        | NFKB2 Nuclear factor of kappa light       | 3209.373  |
| 2167 | D43947_at_GI_41150726-S        | KIAA0100 gene                             | 3209.568  |
| 2168 | D14664_at_NA_illumina          | KIAA0022 gene                             | 3209.7097 |
| 2169 | D43951_at_GI_13491165-S        | ATP SYNTHASE GAMMA CHAIN,                 | 3210.236  |
| 2170 | R76338_at_NA_illumina          | EST: yi61b03.r1 Homo sapiens cDNA         | 3210.3577 |
| 2171 | M81933_at_GI_42490757-S        | CDC25A Cell division cycle 25A            | 3210.4355 |
| 2172 | Z43703_at_NA_illumina          | Homo sapiens HRIHFB2157 mRNA,             | 3210.5586 |
| 2173 | X81788_at_GI_4557656-S         | DS-1 mRNA                                 | 3210.5989 |
| 2174 | RC_AA236254_at_NA_illumina     | EST: zr51d02.s1 Soares NhHMPu S1          | 3210.7642 |
| 2175 | U51096_at_GI_24431948-S        | Homeobox protein Cdx2 mRNA                | 3210.7698 |
| 2176 | AC002073_cds1_at_GI_34222126-S | WUGSC:DJ515N1.2 gene extracted from       | 3211.3037 |
| 2177 | H24127_at_GI_33636747-S        | EST: ym50f03.r1 Homo sapiens cDNA         | 3211.4688 |
| 2178 | K02100_at_GI_38788444-S        | OTC Ornithine carbamoyltransferase        | 3211.4822 |
| 2179 | M35198_at_GI_9966771-S         | Integrin B-6 mRNA                         | 3211.8838 |
| 2180 | AA094720_at_GI_39812071-S      | EST: cp1347.seq.F Fetal heart, Lambda     | 3212.1157 |
| 2181 | D50916_at_GI_38327028-S        | KIAA0126 gene                             | 3212.1333 |

|      |                              |                                           |           |
|------|------------------------------|-------------------------------------------|-----------|
| 2182 | AF012024_s_at_GI_20143949-A  | Integrin cytoplasmic domain associated    | 3212.2305 |
| 2183 | U02680_at_GI_40068474-S      | Protein tyrosine kinase mRNA              | 3212.3936 |
| 2184 | RC_AA425128_at_NA_illumina   | EST: zw07e04.s1 Soares NhHMPu S1          | 3212.4863 |
| 2185 | L13197_at_GI_33457305-S      | PAPPA Pregnancy-associated plasma         | 3212.634  |
| 2186 | Z34974_s_at-2_NA_illumina    | Plakophilin 1 (ectodermal dysplasia/skin  | 3212.6863 |
| 2187 | Z34974_s_at_GI_4505840-S     | PKP1 Plakophilin 1                        | 3212.6863 |
| 2188 | H65925_at_NA_illumina        | EST: yr69f06.r1 Homo sapiens cDNA         | 3212.9456 |
| 2189 | M36634_at_GI_37588852-A      | VIP Vasoactive intestinal peptide         | 3213.1555 |
| 2190 | D30921_at_GI_8923113-S       | EST: Human fetal-lung cDNA 5'-end         | 3213.22   |
| 2191 | L36033_at_GI_40316923-I      | SDF1 Stromal cell-derived factor 1        | 3213.2917 |
| 2192 | W27841_at_NA_illumina        | EST: 38g10 Human retina cDNA randomly     | 3213.828  |
| 2193 | L40393_at_GI_20070355-S      | (clone S171) mRNA                         | 3213.8828 |
| 2194 | T94506_at_NA_illumina        | EST: ye36a05.r1 Homo sapiens cDNA         | 3214.0332 |
| 2195 | AA405548_at_NA_illumina      | EST: zw39f01.r1 Soares total fetus        | 3214.1182 |
| 2196 | AF000177_at_GI_7657312-S     | Sm-like protein CaSm (CaSm) mRNA          | 3214.1824 |
| 2197 | HG880-HT880_at_NA_illumina   | Mucin 6, Gastric (Gb:L07517)              | 3214.6707 |
| 2198 | H57717_at_NA_illumina        | Homo sapiens clone DT1P1B6 mRNA,          | 3214.7646 |
| 2199 | AA431639_at_NA_illumina      | EST: zw72d06.r1 Soares testis NHT Homo    | 3215.0664 |
| 2200 | AA425251_at_GI_38176301-S    | EST: zw47g05.r1 Soares total fetus        | 3215.3572 |
| 2201 | L36645_at_GI_45439363-S      | Receptor protein-tyrosine kinase (HEK8)   | 3215.5522 |
| 2202 | RC_AA035621_at_NA_illumina   | EST: ze24f04.s1 Soares fetal heart        | 3215.6877 |
| 2203 | H72388_at_NA_illumina        | EST: ys06b05.r1 Homo sapiens cDNA         | 3215.8838 |
| 2204 | D87077_at_GI_27498571-S      | KIAA0240 gene, partial cds                | 3216.1724 |
| 2205 | L07541_at_GI_31795537-A      | RFC3 Replication factor C (activator 1) 3 | 3216.4055 |
| 2206 | RC_AA040149_at_NA_illumina   | Human Chromosome 16 BAC clone             | 3216.5493 |
| 2207 | X74331_at_GI_41349494-S      | PRIM2A DNA primase polypeptide 2A         | 3216.7197 |
| 2208 | N83192_at_NA_illumina        | Homo sapiens Opa-interacting protein      | 3216.7861 |
| 2209 | RC_AA463450_at_NA_illumina   | Homo sapiens gene for NBS1, complete      | 3216.891  |
| 2210 | U28833_at_GI_44680111-S      | Down syndrome critical region protein     | 3217.083  |
| 2211 | RC_AA482548_at_GI_40538773-S | EST: zt34b03.s1 Soares ovary tumor        | 3217.1035 |
| 2212 | AA323430_at_GI_21361889-S    | EST: EST26202 Cerebellum II Homo          | 3217.287  |
| 2213 | M23575_f_at_GI_42476158-S    | PSG11 Pregnancy-specific beta-1           | 3217.3958 |
| 2214 | M63603_at_GI_29171725-S      | PLN Phospholamban                         | 3217.4392 |
| 2215 | AA047055_at_GI_39753952-S    | EST: zf50g10.r1 Soares retina N2b4HR      | 3217.5974 |
| 2216 | D31897_at_GI_4503352-S       | Doc2 (Double C2)                          | 3217.6008 |
| 2217 | X04707_at_GI_40806161-S      | C-erb-A mRNA for thyroid hormone          | 3217.929  |
| 2218 | Y09305_at_GI_28827773-S      | Protein kinase, Dyrk4, partial            | 3217.935  |
| 2219 | X56692_at_GI_10835134-S      | CRP C-reactive protein                    | 3218.3923 |
| 2220 | L27479_at_GI_37674229-S      | X123 mRNA, 3' end                         | 3218.4797 |
| 2221 | RC_AA521508_at_GI_44890067-S | Zinc finger protein 262                   | 3218.4885 |
| 2222 | U58334_at_GI_4885642-S       | Bcl2, p53 binding protein Bbp/53BP2       | 3218.6624 |
| 2223 | W28252_at_NA_illumina        | EST: 44b5 Human retina cDNA randomly      | 3218.7002 |
| 2224 | M29971_at_GI_4505176-S       | MGMT 6-O-methylguanine-DNA                | 3218.8674 |

|      |                                |                                             |           |
|------|--------------------------------|---------------------------------------------|-----------|
| 2225 | U13219_at_GI_4503732-S         | Forkhead protein FREAC-1 mRNA               | 3218.9602 |
| 2226 | HG4126-HT4396_at_NA_illumina   | Zinc Finger Protein Hzf4                    | 3218.9866 |
| 2227 | RC_AA018618_f_at_GI_37540454-S | EST: ze53a12.s1 Soares retina N2b4HR        | 3219.0425 |
| 2228 | S83309_s_at_GI_15451849-A      | Nuclear orphan receptor mRNA                | 3219.1538 |
| 2229 | M64936_at_NA_illumina          | Retinoic acid-inducible endogenous          | 3219.1777 |
| 2230 | AA252346_at_GI_9951918-S       | Zs12c08.r1 NCI_CGAP_GCB1 Homo               | 3219.5603 |
| 2231 | M81780_cds3_at_NA_illumina     | SMPD1 gene (acid sphingomyelinase)          | 3219.6897 |
| 2232 | D88155_s_at_GI_24432033-S      | Steroidogenic factor 1 mRNA                 | 3219.857  |
| 2233 | U79296_at_GI_4505698-S         | DLAT Dihydrolipoamide S-                    | 3220.0854 |
| 2234 | RC_AA133584_at_NA_illumina     | Homo sapiens mRNA for JM1 protein,          | 3220.1077 |
| 2235 | M14113_at_GI_10518505-A        | F8C Coagulation factor VIIIc (hemophilia    | 3220.5994 |
| 2236 | U55766_at_GI_37059784-S        | Rev interacting protein Rip-1 mRNA          | 3220.6194 |
| 2237 | HG2147-HT2217_r_at_NA_illumina | Mucin 3, Intestinal (Gb:M55405)             | 3220.7593 |
| 2238 | R09815_at_GI_22749464-S        | Proteasome (prosome, macropain) 26S         | 3221.0535 |
| 2239 | AA336515_at_GI_14249523-S      | EST41354 Endometrial tumor Homo             | 3221.1482 |
| 2240 | AA053853_at_NA_illumina        | EST: zf52d01.r1 Soares retina N2b4HR        | 3221.2769 |
| 2241 | R67854_at_NA_illumina          | EST: yi28d11.r1 Homo sapiens cDNA           | 3221.6443 |
| 2242 | RC_AA477486_at_GI_33438585-S   | EST: zu44h05.s1 Soares ovary tumor          | 3221.6592 |
| 2243 | RC_AA233532_at_GI_34915997-S   | EST: zr30g08.s1 Stratagene NT2 neuronal     | 3221.718  |
| 2244 | RC_AA278323_at_GI_34222351-S   | Homo sapiens clone 24606 mRNA               | 3221.76   |
| 2245 | L38593_s_at_NA_illumina        | Integral membrane protein (NRAMP1)          | 3221.7805 |
| 2246 | X91653_s_at_NA_illumina        | DNA for exon encoding for N-                | 3222.2903 |
| 2247 | U82319_at_NA_illumina          | Clone YDD19 mRNA sequence                   | 3222.4185 |
| 2248 | U82319_at-2_NA_illumina        | Homo sapiens clone YDD19 mRNA               | 3222.4185 |
| 2249 | AC000099_at_GI_4504148-S       | Metabotropic glutamate receptor 8 mRNA      | 3222.5967 |
| 2250 | AA085476_at_NA_illumina        | EST: zn44a10.r1 Stratagene HeLa cell s3     | 3222.6013 |
| 2251 | D42046_at_GI_37551214-S        | KIAA0083 gene, partial cds                  | 3223.009  |
| 2252 | D42046_at-2_NA_illumina        | DNA2 (DNA replication helicase, yeast,      | 3223.009  |
| 2253 | Y11215_at-2_NA_illumina        | Src kinase-associated phosphoprotein of     | 3223.0942 |
| 2254 | Y11215_at_GI_16753209-S        | SKAP55 protein                              | 3223.0942 |
| 2255 | X79201_at_GI_5032124-S         | SYT                                         | 3223.3052 |
| 2256 | RC_AA284362_at_GI_41281560-S   | Homo sapiens mRNA for KIAA0911              | 3223.3103 |
| 2257 | M69238_at_GI_30795239-A        | ARNT Aryl hydrocarbon receptor nuclear      | 3223.5056 |
| 2258 | U09609_at_NA_illumina          | NFKB2 Nuclear factor of kappa light         | 3223.5156 |
| 2259 | Z82022_at_GI_42794008-S        | Dolichyl-phosphate N-                       | 3223.5886 |
| 2260 | D13642_at_GI_40254848-S        | KIAA0017 gene                               | 3223.6328 |
| 2261 | W21204_at_GI_17017973-S        | Wingless-type MMTV integration site         | 3223.7458 |
| 2262 | U69140_s_at_NA_illumina        | RPS26 Ribosomal protein S26                 | 3223.7468 |
| 2263 | D83699_at_GI_4504492-S         | Brain 3'UTR of mRNA for neuronal death      | 3223.8296 |
| 2264 | RC_AA424515_at_NA_illumina     | EST: zv90f02.s1 Soares NhHMPu S1            | 3224.2483 |
| 2265 | X80907_at_GI_4826907-S         | P85 beta subunit of phosphatidylinositol-3- | 3224.6921 |
| 2266 | AA263009_at_GI_20127554-S      | Ribosomal protein L14                       | 3224.9238 |
| 2267 | HG4157-HT4427_at_NA_illumina   | Glycinamide Ribonucleotide Synthetase       | 3224.942  |

|      |                                |                                            |           |
|------|--------------------------------|--------------------------------------------|-----------|
| 2268 | HG4178-HT4448_at_NA_illumina   | Af-17                                      | 3224.991  |
| 2269 | D86960_at_NA_illumina          | KIAA0205 gene                              | 3225.3088 |
| 2270 | AA093287_at_NA_illumina        | EST: ll10132.seq.F Fetal heart, Lambda     | 3225.4458 |
| 2271 | U79282_at_GI_37556009-S        | Clone 23801 mRNA sequence                  | 3225.6594 |
| 2272 | AA458513_at_GI_23503326-A      | EST: zx96a07.r1 Soares ovary tumor         | 3225.8313 |
| 2273 | U76189_at_GI_14149608-S        | EXTL2 (EXTL2) mRNA, partial cds            | 3225.9878 |
| 2274 | RC_AA609616_at_NA_illumina     | EST: af15g02.s1 Soares testis NHT Homo     | 3226.0935 |
| 2275 | HG2348-HT2444_s_at_NA_illumina | Peptide Yy                                 | 3226.1152 |
| 2276 | HG4582-HT4987_at_NA_illumina   | Glucocorticoid Receptor, Beta              | 3226.252  |
| 2277 | L20320_at_GI_16950659-S        | CDK7 Cyclin-dependent kinase 7             | 3226.4294 |
| 2278 | D13636_at_GI_4504204-S         | KIAA0011 gene                              | 3226.434  |
| 2279 | RC_AA243875_at_NA_illumina     | EST: zr65f01.s1 Soares NhHMPu S1           | 3226.6958 |
| 2280 | M26004_s_at_GI_42544176-S      | CR2 Complement component (3d/Epstein       | 3226.718  |
| 2281 | D26528_at_NA_illumina          | RNA helicase                               | 3226.7542 |
| 2282 | J04760_at_GI_21361554-S        | TNNI1 Troponin I, skeletal, slow           | 3226.8347 |
| 2283 | RC_AA427620_at_NA_illumina     | EST: zw30d02.s1 Soares ovary tumor         | 3226.839  |
| 2284 | RC_AA449431_s_at_NA_illumina   | EST: zx05c05.s1 Soares total fetus         | 3227.2505 |
| 2285 | AA446786_at_NA_illumina        | EST: zw89e06.r1 Soares total fetus         | 3227.4712 |
| 2286 | HG3123-HT3299_at_NA_illumina   | Homeotic Protein Gbx2                      | 3227.491  |
| 2287 | M83738_at_GI_18375663-S        | PTPN9 Protein tyrosine phosphatase, non-   | 3227.7297 |
| 2288 | RC_AA435606_at_NA_illumina     | EST: zt74a11.s1 Soares testis NHT Homo     | 3227.9302 |
| 2289 | RC_D60341_at_NA_illumina       | EST: Human fetal brain cDNA 3'-end GEN-    | 3228.0713 |
| 2290 | AA092182_at_GI_17402910-A      | EST: ll6255.seq.F Fetal heart, Lambda      | 3228.3696 |
| 2291 | AA287840_at_NA_illumina        | Zs50g08.r1 NCI_CGAP_GCB1 Homo              | 3228.4053 |
| 2292 | U84011_s_at_GI_4557280-A       | AGL Amylo-1,6-glucosidase, 4-alpha-        | 3228.4792 |
| 2293 | M88282_at_GI_38683838-S        | T-CELL SURFACE PROTEIN TACTILE             | 3228.4985 |
| 2294 | X74295_at_GI_4504752-S         | ITGA7 Integrin, alpha 7B                   | 3228.6172 |
| 2295 | RC_D25786_at_GI_29544746-S     | Myosin, heavy polypeptide-like (110kD)     | 3229.0315 |
| 2296 | L36861_at_GI_40254414-S        | Guanylate cyclase activating protein       | 3229.2915 |
| 2297 | U10686_at_GI_29029614-S        | MAGE-11 antigen (MAGE11) gene              | 3229.6318 |
| 2298 | U52154_at_GI_24797140-S        | Clone KGP G-protein coupled inwardly       | 3230.0344 |
| 2299 | HG3748-HT4018_at_NA_illumina   | Basic Transcription Factor, 44 Kda Subunit | 3230.169  |
| 2300 | D78335_at_NA_illumina          | 5'-terminal region of UMK                  | 3230.638  |
| 2301 | K02777_s_at_NA_illumina        | T-cell receptor active alpha-chain mRNA    | 3230.664  |
| 2302 | HG64-HT64_at_NA_illumina       | Nf-Kappa B-Binding Protein Kbp-1           | 3230.8958 |
| 2303 | AA090692_at_GI_13376087-S      | EST: y1313.seq.F Fetal heart, Lambda       | 3231.044  |
| 2304 | RC_AA176164_i_at_NA_illumina   | EST: zp23h11.s1 Stratagene                 | 3231.2854 |
| 2305 | HG4102-HT4372_at_NA_illumina   | N-Ethylmaleimide-Sensitive Factor          | 3231.3845 |
| 2306 | HG3088-HT3263_at_NA_illumina   | Splicing Factor Sc35, Alt Splice Form 3    | 3231.733  |
| 2307 | AA013042_at_GI_9506650-S       | EST: ze35d03.r1 Soares retina N2b4HR       | 3231.867  |
| 2308 | D21241_xpt1_s_at_GI_13904857-A | Ovary- and prostate-specific exon 1 from   | 3231.8955 |
| 2309 | RC_AA608716_at_NA_illumina     | EST: ae56d06.s1 Stratagene lung            | 3232.008  |
| 2310 | RC_AA456033_at_NA_illumina     | Collagen, type I, alpha 2                  | 3232.0156 |

|      |                                |                                           |           |
|------|--------------------------------|-------------------------------------------|-----------|
| 2311 | D17525_at_GI_21264358-A        | CRARF C4/C2 activating component of Ra-   | 3232.658  |
| 2312 | RC_AA243842_at_NA_illumina     | EST: zr68a03.s1 Soares NhHMPu S1          | 3232.9534 |
| 2313 | L12060_s_at_GI_38505166-S      | RARG Retinoic acid receptor, gamma 1      | 3233.0205 |
| 2314 | H87488_at_GI_24586664-S        | EST: yw14a09.r1 Homo sapiens cDNA         | 3233.1045 |
| 2315 | U75276_s_at_GI_22035559-A      | TFIIB related factor hBRF (HBRF) mRNA     | 3233.276  |
| 2316 | W25821_at_NA_illumina          | EST: 14e10 Human retina cDNA randomly     | 3233.2925 |
| 2317 | U61232_at_GI_6006029-S         | Tubulin-folding cofactor E mRNA           | 3233.382  |
| 2318 | RC_AA449104_at_NA_illumina     | EST: zx08a02.s1 Soares total fetus        | 3233.9868 |
| 2319 | N28843_at_NA_illumina          | EST: yx59d10.r1 Homo sapiens cDNA         | 3234.2842 |
| 2320 | RC_AA252894_at_NA_illumina     | EST: zr76e02.s1 Soares NhHMPu S1          | 3234.403  |
| 2321 | U28055_at_NA_illumina          | MST1 Macrophage stimulating 1             | 3234.431  |
| 2322 | AA384220_at_NA_illumina        | EST: EST97923 Thyroid Homo sapiens        | 3234.449  |
| 2323 | S80335_at_GI_4504776-S         | ITGB7 Integrin beta-7 subunit             | 3234.4724 |
| 2324 | AA160724_at_NA_illumina        | Dihydropyrimidinase-like 2                | 3234.4792 |
| 2325 | D49354_s_at_GI_29171752-A      | Enhancer protein in hsp70 gene, partial   | 3234.5435 |
| 2326 | J05032_at-2_NA_illumina        | Aspartyl-tRNA synthetase                  | 3234.5745 |
| 2327 | J05032_at_GI_45439305-S        | ASPARTYL-TRNA SYNTHETASE                  | 3234.5745 |
| 2328 | W24039_at_NA_illumina          | Homo sapiens clone 24700 unknown          | 3234.7441 |
| 2329 | M28212_at_GI_38679893-A        | RAB6 RAB6, member RAS oncogene            | 3234.93   |
| 2330 | X89430_at_GI_7710148-S         | Methyl CpG binding protein 2              | 3234.978  |
| 2331 | X78031_at_GI_4758405-S         | Alpha(1,3)fucosyltransferase mRNA         | 3235.0942 |
| 2332 | U49974_f_at_NA_illumina        | Mariner2 transposable element, complete   | 3235.1362 |
| 2333 | U59863_at_GI_19743570-A        | TRAF-interacting protein I-TRAF mRNA      | 3235.1465 |
| 2334 | H71667_at_NA_illumina          | EST: ys01a01.r1 Homo sapiens cDNA         | 3235.294  |
| 2335 | U00238_rna1_at_GI_29570797-S   | Glutamine PRPP amidotransferase           | 3235.3237 |
| 2336 | AA248994_at_NA_illumina        | EST: I2187.seq.F Human fetal heart,       | 3235.5417 |
| 2337 | S80562_at_GI_4502922-S         | CNN3 Calponin 3, acidic                   | 3235.7397 |
| 2338 | X82693_at_GI_11321574-S        | E48 antigen                               | 3235.8135 |
| 2339 | RC_AA436836_at_NA_illumina     | EST: zv57g06.s1 Soares testis NHT Homo    | 3236.8052 |
| 2340 | AA323418_at_GI_31657100-A      | EST: EST26190 Cerebellum II Homo          | 3236.8599 |
| 2341 | X03473_at_GI_20336758-S        | HISTONE H1'                               | 3236.9282 |
| 2342 | RC_AA609888_at_GI_21687223-S   | EST: af19a02.s1 Soares total fetus        | 3237.2998 |
| 2343 | D50863_at_GI_5454109-S         | TESK1                                     | 3237.3718 |
| 2344 | RC_AA478781_at_NA_illumina     | EST: zv20c01.s1 Soares NhHMPu S1          | 3237.5437 |
| 2345 | X66533_at_GI_4504214-S         | GUANYLATE CYCLASE SOLUBLE, BETA.          | 3237.734  |
| 2346 | RC_AA010889_at_GI_38327643-S   | EST: ze23a03.s1 Soares fetal heart        | 3237.8076 |
| 2347 | AA134602_at_NA_illumina        | EST: zn90c04.r1 Stratagene lung           | 3237.959  |
| 2348 | M62896_i_at_NA_illumina        | Human lipocortin (LIP) 2 pseudogene       | 3238.0178 |
| 2349 | U08377_at_GI_23111063-A        | Homolog of Drosophila splicing regulator  | 3238.0725 |
| 2350 | D00726_at_GI_4557592-S         | FECH Ferrochelataase (protoporphyrin)     | 3238.4753 |
| 2351 | U48231_at_GI_20544171-S        | Bradykinin receptor B1 subtype mRNA       | 3238.476  |
| 2352 | AA203742_at_NA_illumina        | EST: zx53d05.r1 Soares fetal liver spleen | 3238.7542 |
| 2353 | Y08682_rna1_s_at_GI_23238255-A | Carnitine palmitoyltransferase I type I   | 3239.0417 |

|      |                                |                                            |           |
|------|--------------------------------|--------------------------------------------|-----------|
| 2354 | AA447349_at_NA_illumina        | EST: zw93g08.r1 Soares total fetus         | 3239.114  |
| 2355 | D89859_at_GI_19923241-S        | Zinc finger 5 protein                      | 3239.1968 |
| 2356 | RC_AA427864_at_NA_illumina     | EST: zw50b04.s1 Soares total fetus         | 3239.211  |
| 2357 | AA090686_s_at_GI_34147567-S    | H.sapiens hGDS mRNA for smg GDS            | 3239.279  |
| 2358 | RC_AA489233_at_NA_illumina     | EST: aa57g04.s1 NCI_CGAP_GCB1              | 3239.472  |
| 2359 | X00371_rna1_at_GI_4885476-S    | Myoglobin gene (exon 1) (and joined CDS)   | 3239.5378 |
| 2360 | D87076_at_GI_40556369-S        | KIAA0239 gene, partial cds                 | 3239.5535 |
| 2361 | U67614_at_NA_illumina          | No description available for U67614        | 3239.614  |
| 2362 | D87470_at_GI_42659728-S        | KIAA0280 gene, partial cds                 | 3240.096  |
| 2363 | AA203345_at_NA_illumina        | EST: zx56b04.r1 Soares fetal liver spleen  | 3240.2336 |
| 2364 | RC_AA035613_at_NA_illumina     | EST: ze24e02.s1 Soares fetal heart         | 3240.2358 |
| 2365 | RC_AA449718_at_NA_illumina     | EST: zx09b07.s1 Soares total fetus         | 3240.3396 |
| 2366 | RC_AA417935_at_NA_illumina     | EST: zv94c08.s1 Soares NhHMPu S1           | 3240.3948 |
| 2367 | R78838_s_at_NA_illumina        | EST: yi90d06.r1 Homo sapiens cDNA          | 3240.4565 |
| 2368 | M31516_s_at_GI_40788009-S      | DAF Decay accelerating factor for          | 3241.3467 |
| 2369 | W67867_at_NA_illumina          | KIAA0685 gene product                      | 3241.4648 |
| 2370 | T84293_at_NA_illumina          | EST: yd47d03.r1 Homo sapiens cDNA          | 3241.4705 |
| 2371 | N42272_s_at_GI_25014110-S      | EST: yw85f08.r1 Homo sapiens cDNA          | 3241.8005 |
| 2372 | W01182_at_NA_illumina          | EST: za59e05.r1 Soares fetal liver spleen  | 3241.9768 |
| 2373 | D87075_at_GI_44680146-A        | KIAA0238 gene, partial cds                 | 3242.2954 |
| 2374 | X98178_s_at_NA_illumina        | MACH-beta-4 protein                        | 3242.4148 |
| 2375 | R18400_at_NA_illumina          | CD39 antigen                               | 3242.4587 |
| 2376 | U50062_at_GI_24475887-S        | Cell death protein (RIP) mRNA, partial cds | 3242.5352 |
| 2377 | U50062_at-2_NA_illumina        | Receptor (TNFRSF)-interacting serine-      | 3242.5352 |
| 2378 | W44973_at_GI_19913359-S        | Homo sapiens mRNA for transducin (beta)    | 3242.6685 |
| 2379 | T86389_at_NA_illumina          | EST: yd77c02.r1 Homo sapiens cDNA          | 3242.8162 |
| 2380 | U20760_at_NA_illumina          | CASR Calcium-sensing receptor              | 3242.8557 |
| 2381 | Z29572_at_NA_illumina          | Antisense mRNA for BCMA peptide            | 3242.9797 |
| 2382 | X62048_at_GI_19718775-S        | WEE1-LIKE PROTEIN KINASE                   | 3243.0652 |
| 2383 | U02082_at_GI_15011975-S        | Guanine nucleotide regulatory protein      | 3243.352  |
| 2384 | Z15005_at_GI_4502780-S         | CENPE Centromere protein E (312kD)         | 3243.384  |
| 2385 | RC_AA450200_at_GI_33946298-S   | EST: zx43a01.s1 Soares total fetus         | 3243.5503 |
| 2386 | HG3635-HT3845_f_at_NA_illumina | Zinc Finger Protein, Kruppel-Like          | 3243.8171 |
| 2387 | U43519_at_GI_4503392-S         | DRP2 Dystrophin related protein 2          | 3244.2747 |
| 2388 | X03663_at_GI_27262658-S        | CSF1R Colony stimulating factor 1          | 3244.2751 |
| 2389 | RC_AA279991_at_NA_illumina     | EST: zs93e11.s1 NCI_CGAP_GCB1              | 3244.4487 |
| 2390 | HG3288-HT3465_at_NA_illumina   | Xanthine Dehydrogenase (Gb:U06117)         | 3244.7395 |
| 2391 | Y12812_at_GI_19924157-S        | RFXAP mRNA                                 | 3244.7695 |
| 2392 | Y12812_at-2_NA_illumina        | Regulatory factor X-associated protein     | 3244.7695 |
| 2393 | HG4638-HT5050_at_NA_illumina   | Spliceosomal Protein Sap 49                | 3244.8271 |
| 2394 | U30610_at_GI_7669498-A         | CD94 CD94 antigen (NK/T-cell C-type        | 3244.9453 |
| 2395 | RC_AA281540_at_GI_12232436-S   | EST: zt04e02.s1 NCI_CGAP_GCB1 Homo         | 3245.0085 |
| 2396 | S68271_s_at_NA_illumina        | CREM CAMP responsive element               | 3245.061  |



|      |                                |                                          |           |
|------|--------------------------------|------------------------------------------|-----------|
| 2397 | X64838_at_GI_38044111-A        | RSN Restin (Reed-Steinberg cell-         | 3245.1074 |
| 2398 | C02532_at_GI_18780272-S        | EST: HUMGS0012430, Human Gene            | 3245.1545 |
| 2399 | C00185_at_GI_14249549-S        | EST: HUMGS0005838, Human Gene            | 3245.1882 |
| 2400 | U82130_at_GI_18765712-S        | Tumor susceptibility protein (TSG101)    | 3245.2473 |
| 2401 | RC_AA443593_at_GI_17999523-S   | EST: zw35b08.s1 Soares ovary tumor       | 3245.4702 |
| 2402 | U51205_at_GI_40805828-A        | COP9 homolog (HCOP9) mRNA                | 3245.687  |
| 2403 | U18914_at_GI_4827037-S         | 19.8 kDa protein mRNA                    | 3245.7764 |
| 2404 | HG1827-HT1856_s_at_NA_illumina | Cytochrome P450, Subfamily lic, Alt.     | 3245.8538 |
| 2405 | AA282769_at_GI_34222390-S      | EST: zt15c05.r1 NCI_CGAP_GCB1 Homo       | 3245.9858 |
| 2406 | AA323096_at_GI_6912401-S       | H.sapiens mRNA for transcription factor  | 3246.113  |
| 2407 | S69189_at_GI_34304339-A        | Peroxisomal acyl-coenzyme A oxidase      | 3246.252  |
| 2408 | R29548_f_at_NA_illumina        | Proteasome (prosome, macropain)          | 3246.319  |
| 2409 | U10099_s_at_NA_illumina        | ZONA PELLUCIDA SPERM-BINDING             | 3246.3904 |
| 2410 | M26061_at_GI_4585863-S         | CGMP phosphodiesterase alpha subunit     | 3246.5745 |
| 2411 | X68486_at_GI_17136146-S        | ADENOSINE A2A RECEPTOR                   | 3246.6284 |
| 2412 | D87448_at_GI_20143948-S        | KIAA0259 gene, partial cds               | 3246.656  |
| 2413 | RC_AA478809_at_NA_illumina     | EST: zv20h02.s1 Soares NhHMPu S1         | 3246.8245 |
| 2414 | RC_AA453988_at_NA_illumina     | EST: zx46a03.s1 Soares testis NHT Homo   | 3246.8333 |
| 2415 | RC_AA486579_at_GI_8923472-S    | EST: ab16f05.s1 Stratagene lung          | 3247.13   |
| 2416 | H03686_i_at_NA_illumina        | Human GAP SH3 binding protein mRNA,      | 3247.3098 |
| 2417 | AA255862_at_NA_illumina        | Splicing factor proline/glutamine rich   | 3247.3867 |
| 2418 | RC_AA251129_at_GI_20127566-S   | EST: zs03a10.s1 NCI_CGAP_GCB1            | 3247.4097 |
| 2419 | Z84721_cds1_at_GI_6633805-S    | Zeta-globin 1 gene extracted from Human  | 3247.5244 |
| 2420 | AA490572_at_GI_38201689-S      | EST: aa42g09.r1 Soares NhHMPu S1         | 3247.636  |
| 2421 | AA248406_at_GI_34304321-S      | EST: csg3152.seq.F Human fetal heart,    | 3247.6802 |
| 2422 | U11870_rna1_at_GI_29171679-S   | Interleukin-8 receptor type A (IL8RBA)   | 3247.8257 |
| 2423 | X84709_at_GI_22219473-S        | Mediator of receptor-induced toxicity    | 3247.858  |
| 2424 | U58658_at_GI_30795209-A        | Unknown protein mRNA within the p53      | 3248.2446 |
| 2425 | AA404302_at_NA_illumina        | Ribosomal protein L4                     | 3248.5571 |
| 2426 | R66475_at_NA_illumina          | EST: yi32a07.r1 Homo sapiens cDNA        | 3248.9583 |
| 2427 | U06155_at_NA_illumina          | Chromosome 1q subtelomeric sequence      | 3249.3257 |
| 2428 | X04325_at_GI_31542846-S        | GJB1 Gap junction protein, beta 1, 32kD  | 3249.5244 |
| 2429 | RC_AA016306_at_NA_illumina     | EST: ze38e03.s1 Soares retina N2b4HR     | 3249.562  |
| 2430 | U82535_at_GI_4557574-S         | Fatty acid amide hydrolase mRNA          | 3249.6628 |
| 2431 | U18919_at_NA_illumina          | Chromosome 17q12-21 mRNA, clone pOV-     | 3249.7266 |
| 2432 | Z94753_s_at_NA_illumina        | ATP7A ATPase, Cu++ transporting, alpha   | 3249.7407 |
| 2433 | H04627_at_GI_40255097-S        | EST: yj49f04.r1 Homo sapiens cDNA clone  | 3249.7986 |
| 2434 | M80254_at_GI_45439321-S        | PEPTIDYL-PROLYL CIS-TRANS                | 3250.0784 |
| 2435 | D88797_at_NA_illumina          | Cadherin, partial cds                    | 3250.1006 |
| 2436 | RC_AA453487_at_NA_illumina     | Kinesin family protein 3B                | 3250.2449 |
| 2437 | L44544_at_NA_illumina          | BUB3 (budding uninhibited by             | 3250.462  |
| 2438 | X94563_xpt2_r_at_NA_illumina   | Exon 1b; used only in type 2 transcripts | 3251.3738 |
| 2439 | M61764_at_GI_34222287-S        | TUBG Tubulin, gamma polypeptide          | 3251.4375 |

|      |                                |                                          |           |
|------|--------------------------------|------------------------------------------|-----------|
| 2440 | X81333_at_GI_5174550-S         | PPH beta subunit protein                 | 3251.522  |
| 2441 | RC_AA521371_at_GI_13375659-S   | EST: aa77f12.s1 NCI_CGAP_GCB1 Homo       | 3251.5906 |
| 2442 | Z78396_at_NA_illumina          | EST: H.sapiens mRNA, expressed           | 3251.827  |
| 2443 | U49857_at_NA_illumina          | Transcriptional activator mRNA           | 3251.9219 |
| 2444 | RC_AA180321_at_NA_illumina     | Homo sapiens (clone S164) mRNA, 3' end   | 3252.2722 |
| 2445 | RC_AA134233_at_NA_illumina     | EST: zo20f10.s1 Stratagene colon         | 3252.3672 |
| 2446 | RC_AA284328_at_GI_11863155-S   | Homo sapiens ST15 mRNA, complete cds     | 3252.7195 |
| 2447 | X79888_at_GI_4502326-S         | AUH mRNA                                 | 3252.733  |
| 2448 | D82762_at_GI_34222332-S        | EST: similar to none, mRNA sequence.     | 3252.7585 |
| 2449 | D63481_at_GI_33186909-A        | KIAA0147 gene, partial cds               | 3252.8745 |
| 2450 | D25539_at_GI_7657258-S         | KIAA0040 gene                            | 3252.982  |
| 2451 | RC_AA281934_at_GI_37059777-S   | EST: zt09b02.s1 NCI_CGAP_GCB1 Homo       | 3253.0093 |
| 2452 | AA176115_at_NA_illumina        | EST: zp22h02.r1 Stratagene               | 3253.1091 |
| 2453 | AA148581_at_GI_28626520-S      | Human mariner-like element-containing    | 3253.1775 |
| 2454 | AA214658_at_NA_illumina        | H beta 58 homolog                        | 3253.4136 |
| 2455 | U66617_at_GI_21264347-A        | SWI/SNF complex 60 KDa subunit           | 3253.7544 |
| 2456 | U68162_cds1_s_at_GI_4885490-S  | MPL gene (thrombopoietin receptor)       | 3253.952  |
| 2457 | M32879_at_NA_illumina          | CYP11B1 Cytochrome P450 11 beta          | 3253.9697 |
| 2458 | X17648_at_GI_27437039-A        | GRANULOCYTE-MACROPHAGE                   | 3254.3657 |
| 2459 | RC_D20378_at_NA_illumina       | EST: Human HL60 3'directed Mbol cDNA,    | 3254.864  |
| 2460 | AA165234_at_NA_illumina        | Immunoglobulin (CD79A) binding protein 1 | 3254.936  |
| 2461 | U04847_at_NA_illumina          | Ini1 mRNA                                | 3254.9744 |
| 2462 | RC_AA421611_at_NA_illumina     | EST: zu26c05.s1 Soares ovary tumor       | 3255.0222 |
| 2463 | RC_AA237034_at_NA_illumina     | Golgi SNAP receptor complex member 2     | 3255.0667 |
| 2464 | M34181_at_GI_4506056-A         | PRKACB Protein kinase, cAMP-             | 3255.1846 |
| 2465 | X16983_at_GI_6006032-S         | ITGA4 Integrin, alpha 4 (antigen CD49D,  | 3255.2073 |
| 2466 | M88579_at_GI_34303952-S        | Zinc finger protein (SRE-ZBP) mRNA, 3'   | 3255.4634 |
| 2467 | U25029_at_NA_illumina          | GRL Glucocorticoid receptor alpha        | 3255.6116 |
| 2468 | AA248479_at_GI_7662658-S       | KIAA0755 gene product                    | 3256.2249 |
| 2469 | U18549_at_GI_31377786-S        | PROBABLE G PROTEIN-COUPLED               | 3256.2803 |
| 2470 | RC_AA285153_at_GI_21361744-S   | EST: zs48d06.s1 NCI_CGAP_GCB1            | 3256.3743 |
| 2471 | U31099_at_GI_38505191-S        | DP prostanoid receptor (PTGDR) mRNA,     | 3256.4355 |
| 2472 | X61373_at_NA_illumina          | Microtubule-associated protein tau (tau) | 3256.5588 |
| 2473 | HG11111-HT11111_at_NA_illumina | Ras-Like Protein Tc21                    | 3256.64   |
| 2474 | RC_AA489499_at_GI_14150040-S   | EST: ab41g11.s1 Stratagene HeLa cell s3  | 3256.7732 |
| 2475 | RC_AA456286_at_NA_illumina     | EST: aa13e03.s1 Soares NhHMPu S1         | 3256.8005 |
| 2476 | AA084932_at_GI_16905521-A      | Golgi SNAP receptor complex member 2     | 3256.8354 |
| 2477 | RC_AA018877_at_GI_7662391-S    | EST: ze58g08.s1 Soares retina N2b4HR     | 3256.9182 |
| 2478 | X87160_at_NA_illumina          | Kidney epithelial sodium channel gamma   | 3257.0327 |
| 2479 | D85131_s_at_GI_13399295-S      | Myc-associated zinc-finger protein of    | 3257.0452 |
| 2480 | L42542_at_GI_21361362-S        | RLIP76 protein mRNA                      | 3257.1106 |
| 2481 | U38480_at_GI_21361386-S        | Retinoid X receptor-gamma mRNA           | 3257.146  |
| 2482 | AA249385_at_GI_7706124-S       | EST: j2332.seq.F Human fetal heart,      | 3257.1929 |

|      |                                |                                            |           |
|------|--------------------------------|--------------------------------------------|-----------|
| 2483 | Y00816_s_at_NA_illumina        | Complement component (3b/4b) receptor      | 3257.341  |
| 2484 | W03178_at_NA_illumina          | EST: za54c04.r1 Soares fetal liver spleen  | 3257.3499 |
| 2485 | AA403202_at_GI_19923133-S      | Conserved helix-loop-helix ubiquitous      | 3257.383  |
| 2486 | RC_AA234000_s_at_GI_38045935-  | EST: zr49g12.s1 Soares NhHMPu S1           | 3257.701  |
| 2487 | RC_AA007169_at_NA_illumina     | EST: 13cDNA35-3.seq Soares infant brain    | 3258.5496 |
| 2488 | U50535_at_GI_7656970-S         | BRCA2 region, mRNA sequence CG005          | 3258.596  |
| 2489 | U66036_at_GI_29029531-A        | Sulfotransferase mRNA                      | 3258.8345 |
| 2490 | U33920_at_NA_illumina          | Clone lambda 5 semaphorin mRNA             | 3259.0332 |
| 2491 | U08023_at_GI_5453737-S         | Cellular proto-oncogene (c-mer) mRNA       | 3259.1099 |
| 2492 | H58818_at_GI_33469144-S        | EST: yr36a04.r1 Homo sapiens cDNA          | 3259.217  |
| 2493 | J02645_at_GI_34147492-S        | EIF2A Eukaryotic translation initiation    | 3259.6558 |
| 2494 | X69950_s_at_NA_illumina        | WT1 Wilms tumor 1                          | 3259.8027 |
| 2495 | AA167340_at_NA_illumina        | Zp11a09.r1 Stratagene fetal retina 937202  | 3259.8142 |
| 2496 | L76937_rna1_at_GI_19924171-S   | Unnamed protein product gene extracted     | 3259.8962 |
| 2497 | RC_AA488411_at_NA_illumina     | EST: ab37g10.s1 Stratagene HeLa cell s3    | 3260.3342 |
| 2498 | W28360_at_NA_illumina          | EST: 46f9 Human retina cDNA randomly       | 3260.7585 |
| 2499 | AA174149_at_NA_illumina        | EST: PTH056 HTCDDL1 Homo sapiens           | 3260.872  |
| 2500 | X59739_at_GI_4507964-S         | ZFX Zinc finger protein, X-linked          | 3260.925  |
| 2501 | W25869_at_NA_illumina          | EST: 14c3 Human retina cDNA randomly       | 3261.023  |
| 2502 | AA152028_at_NA_illumina        | EST: zl49f10.r1 Soares pregnant uterus     | 3261.028  |
| 2503 | M15881_at_GI_4507832-S         | UMOD Uromodulin (uromucoid, Tamm-          | 3261.1008 |
| 2504 | AA322870_at_GI_21264338-S      | Homo sapiens SOX22 protein (SOX22)         | 3261.168  |
| 2505 | Y09306_at_GI_29469068-S        | Protein kinase, Dyrk6, partial             | 3261.422  |
| 2506 | L04656_at_GI_22027499-S        | Carbonic anhydrase-related protein VIII    | 3261.545  |
| 2507 | M31774_s_at_GI_4507700-S       | TSHR Thyroid stimulating hormone           | 3261.5808 |
| 2508 | X63546_at_GI_4758563-S         | UBIQUITIN CARBOXYL-TERMINAL                | 3261.7173 |
| 2509 | L29277_at_GI_21618337-A        | STAT3 Signal transducer and activator of   | 3261.7402 |
| 2510 | K03218_at_GI_38202216-A        | PROTO-ONCOGENE TYROSINE-                   | 3261.8057 |
| 2511 | RC_D54299_at_NA_illumina       | EST: Human fetal brain cDNA 3'-end GEN-    | 3261.8088 |
| 2512 | D79572_at_NA_illumina          | Human aorta cDNA 5'-end GEN-281G04,        | 3261.8457 |
| 2513 | H82162_at_NA_illumina          | Human CCAAT-box-binding factor (CBF)       | 3261.8772 |
| 2514 | Y08223_at_NA_illumina          | MFH-1 gene                                 | 3261.9475 |
| 2515 | X55989_rna1_at_NA_illumina     | ECRP gene for eosinophil cationic related  | 3261.9978 |
| 2516 | L15296_s_at_GI_4502918-S       | Clone hRCNC2b retinal rod cyclic           | 3262.0117 |
| 2517 | HG3921-HT4191_f_at_NA_illumina | Homeotic Protein C6, Class I               | 3262.032  |
| 2518 | RC_AA165145_at_NA_illumina     | EST: zo94e09.s1 Stratagene ovarian         | 3262.111  |
| 2519 | S34389_at_GI_8051607-S         | HMOX2 Heme oxygenase (decycling) 2         | 3262.1353 |
| 2520 | U77718_at_GI_33356173-S        | Desmosome associated protein pinin         | 3262.2068 |
| 2521 | RC_AA210707_at_NA_illumina     | EST: zr88c09.s1 NCI_CGAP_GCB1 Homo         | 3262.2622 |
| 2522 | D86958_at_GI_41350194-S        | KIAA0203 gene                              | 3262.4814 |
| 2523 | W58725_at_NA_illumina          | Mitogen-activated protein kinase-activated | 3262.501  |
| 2524 | Z29077_xpt1_at_NA_illumina     | Un-named-transcript-1 from H.sapiens       | 3262.5198 |
| 2525 | X76059_at_NA_illumina          | YRRM1                                      | 3263.0056 |

|      |                                |                                               |           |
|------|--------------------------------|-----------------------------------------------|-----------|
| 2526 | X95097_rna1_s_at_GI_33188464-S | VIP2 receptor                                 | 3263.077  |
| 2527 | U84388_at_NA_illumina          | Death domain containing protein CRADD         | 3263.103  |
| 2528 | R24011_at_GI_37552560-S        | EST: yh29e05.r1 Homo sapiens cDNA             | 3263.307  |
| 2529 | Z22970_at_GI_19923275-S        | M130 antigen                                  | 3263.3977 |
| 2530 | AA456895_at_NA_illumina        | Aa38d10.r1 NCI_CGAP_GCB1 Homo                 | 3263.463  |
| 2531 | H56750_at_NA_illumina          | EST: yq99f02.r1 Homo sapiens cDNA             | 3263.569  |
| 2532 | D38535_at_GI_40288189-S        | PK-120                                        | 3263.616  |
| 2533 | X59618_at_GI_4557844-S         | RRM2 Ribonucleotide reductase M2              | 3263.7034 |
| 2534 | X16889_s_at_NA_illumina        | Galactosidase, alpha                          | 3263.813  |
| 2535 | HG4749-HT5197_at_NA_illumina   | Calmitine Calcium-Binding Protein,            | 3264.0747 |
| 2536 | M10014_cds1_at_GI_11761634-A   | Fibrinogen gamma chain and gamma-             | 3264.2517 |
| 2537 | AA454227_at_GI_33469986-S      | EST: zx48h11.r1 Soares testis NHT Homo        | 3264.4487 |
| 2538 | H47839_at_GI_30794499-S        | EST: yp76f09.r1 Homo sapiens cDNA             | 3264.51   |
| 2539 | RC_D59276_at_NA_illumina       | EST: Human fetal brain cDNA 3'-end GEN-       | 3264.619  |
| 2540 | M28170_at_NA_illumina          | CD19 CD19 antigen                             | 3264.7812 |
| 2541 | W27995_at_NA_illumina          | EST: 43e12 Human retina cDNA randomly         | 3264.8855 |
| 2542 | W04245_at_GI_41144284-S        | EST: za58h12.r1 Soares fetal liver spleen     | 3265.1777 |
| 2543 | AB000449_at_GI_4507902-S       | VRK1                                          | 3265.2266 |
| 2544 | U66061_cds3_at_NA_illumina     | TRY8 gene (trypsinogen E) extracted from      | 3265.454  |
| 2545 | W67189_at_NA_illumina          | EST: zd43g04.r1 Soares fetal heart            | 3266.2075 |
| 2546 | D85376_at_GI_4507680-S         | TRHR Thyrotropin-releasing hormone            | 3266.2305 |
| 2547 | AA393652_at_NA_illumina        | Plasminogen                                   | 3266.2773 |
| 2548 | AA057447_s_at_NA_illumina      | EST: zf56b01.r1 Soares retina N2b4HR          | 3266.2773 |
| 2549 | AA203730_at_GI_24475643-S      | EST: zx53h01.r1 Soares fetal liver spleen     | 3266.3057 |
| 2550 | AA329026_at_GI_33300638-S      | EST: EST32605 Embryo, 12 week I Homo          | 3266.3213 |
| 2551 | Z33642_at_GI_4758589-S         | V7 mRNA for leukocyte surface protein         | 3266.3716 |
| 2552 | RC_AA504642_at_NA_illumina     | EST: aa63e04.s1 NCI_CGAP_GCB1                 | 3266.4133 |
| 2553 | AA488505_at_NA_illumina        | Human placenta (Diff33) mRNA, complete        | 3266.9446 |
| 2554 | HG3976-HT4246_at_NA_illumina   | Pou-Domain Dna Binding Factor Pit1,           | 3267.3687 |
| 2555 | S70348_at_NA_illumina          | ITGB3 Integrin, beta 3 (platelet              | 3267.4783 |
| 2556 | S70348_at-2_NA_illumina        | Integrin beta 3 {alternatively spliced, clone | 3267.4783 |
| 2557 | AA318315_at_GI_40353205-S      | Homo sapiens clone 23781 mRNA                 | 3267.5833 |
| 2558 | RC_AA114866_s_at_GI_24497552-  | Homo sapiens homeobox A11 (HOXA11)            | 3267.626  |
| 2559 | M21535_at_NA_illumina          | Erg protein (ets-related gene) mRNA           | 3267.771  |
| 2560 | S49592_s_at_GI_12669910-S      | Transcription factor E2F like protein         | 3267.852  |
| 2561 | HG2663-HT2759_at_NA_illumina   | Homeotic Protein Emx2                         | 3267.9062 |
| 2562 | Z83742_at_GI_15718713-S        | HH2A/c gene                                   | 3268.0017 |
| 2563 | RC_AA598681_at_NA_illumina     | EST: ae48h10.s1 Stratagene lung               | 3268.5718 |
| 2564 | AA426551_at_GI_8923502-S       | EST: zw01g07.r1 Soares NhHMPu S1              | 3268.7979 |
| 2565 | RC_AA435980_at_NA_illumina     | H.sapiens mRNA for AMP-activated              | 3268.868  |
| 2566 | RC_AA035542_at_GI_36951139-S   | EST: ze24c03.s1 Soares fetal heart            | 3269.1682 |
| 2567 | RC_AA004481_at_NA_illumina     | EST: zh89d07.s1 Soares fetal liver spleen     | 3269.2595 |
| 2568 | U90914_at_GI_22202610-S        | Clone 23587 mRNA sequence                     | 3269.2712 |

|      |                              |                                             |           |
|------|------------------------------|---------------------------------------------|-----------|
| 2569 | J00139_s_at_NA_illumina      | DHFR Dihydrofolate reductase                | 3269.3047 |
| 2570 | RC_AA490608_at_GI_38201673-S | EST: aa47g02.s1 NCI_CGAP_GCB1               | 3269.6018 |
| 2571 | AA297234_at_NA_illumina      | EST112777 Embryo, 12 week I Homo            | 3269.623  |
| 2572 | M11186_at_GI_12707574-S      | OXT Oxytocin                                | 3269.6433 |
| 2573 | D61676_at_NA_illumina        | EST: Human fetal brain cDNA 5'-end GEN-     | 3269.7751 |
| 2574 | RC_AA463417_at_NA_illumina   | EST: zx71g06.s1 Soares total fetus          | 3270.0112 |
| 2575 | L05624_s_at_GI_14589898-S    | DUAL SPECIFICITY MITOGEN-                   | 3270.0586 |
| 2576 | AA457197_at_NA_illumina      | EST: aa88d06.r1 Stratagene fetal retina     | 3270.1519 |
| 2577 | U89326_at_2_NA_illumina      | Bone morphogenetic protein receptor, type   | 3270.2637 |
| 2578 | U89326_at_GI_4502430-S       | Bone morphogenetic protein receptor type    | 3270.2637 |
| 2579 | U02683_s_at_NA_illumina      | Alpha palindromic binding protein mRNA      | 3270.2922 |
| 2580 | AA150364_at_GI_22749196-S    | EST: zl07b03.r1 Soares pregnant uterus      | 3270.3635 |
| 2581 | U32674_s_at_GI_4504098-S     | Orphan receptor GPR9 (GPR9) gene,           | 3270.4158 |
| 2582 | H43922_at_NA_illumina        | GLYCERALDEHYDE 3-PHOSPHATE                  | 3270.6077 |
| 2583 | U59111_at_2_NA_illumina      | Dermatan sulphate proteoglycan 3            | 3270.7188 |
| 2584 | U59111_at_GI_10938018-S      | Dermatan sulfate proteoglycan 3 (DSPG3)     | 3270.7188 |
| 2585 | X64877_at_NA_illumina        | HFL1 H factor (complement)-like 1           | 3270.8584 |
| 2586 | AA043223_at_GI_37622350-S    | Homo sapiens clone 486790                   | 3270.9404 |
| 2587 | U10991_at_NA_illumina        | G2 protein mRNA, partial cds                | 3271.071  |
| 2588 | HG1019-HT1019_at_NA_illumina | Serine Kinase Psk-H1                        | 3271.099  |
| 2589 | RC_AA052954_at_NA_illumina   | EST: zl70b02.s1 Stratagene colon            | 3271.1763 |
| 2590 | U82979_at_GI_21314640-S      | Immunoglobulin-like transcript-3 mRNA       | 3271.2568 |
| 2591 | HG3884-HT4154_at_NA_illumina | Homeotic Protein Hpx-42                     | 3271.338  |
| 2592 | RC_AA022913_at_NA_illumina   | EST: ze71h10.s1 Soares fetal heart          | 3271.4363 |
| 2593 | M74096_at_GI_4501856-S       | ACADL Acyl-Coenzyme A dehydrogenase,        | 3272.0933 |
| 2594 | AA453130_at_NA_illumina      | Homo sapiens mRNA for KIP2, complete        | 3272.147  |
| 2595 | X70811_at_NA_illumina        | ADRB3 Adrenergic, beta-3-, receptor         | 3272.1953 |
| 2596 | M59371_at_GI_32967310-S      | TYROSINE-PROTEIN KINASE                     | 3272.334  |
| 2597 | M54968_at_NA_illumina        | K-ras oncogene protein mRNA                 | 3272.6624 |
| 2598 | X02404_at_GI_45439360-S      | CALCB Calcitonin-related polypeptide,       | 3272.855  |
| 2599 | M16961_at_GI_4502004-S       | AHSG Alpha-2-HS-glycoprotein alpha and      | 3272.8896 |
| 2600 | D43772_at_GI_4885354-S       | Squamous cell carcinoma of esophagus        | 3273.1423 |
| 2601 | H50178_at_GI_32967592-A      | EST: yo27h07.r1 Homo sapiens cDNA           | 3273.2117 |
| 2602 | M63582_at_GI_6005919-S       | THYROLIBERIN PRECURSOR                      | 3273.4214 |
| 2603 | W63658_at_NA_illumina        | EST: zc57f09.r1 Soares parathyroid tumor    | 3273.563  |
| 2604 | RC_AA421924_at_NA_illumina   | EST: zv30c11.s1 Soares ovary tumor          | 3273.773  |
| 2605 | RC_AA610086_at_NA_illumina   | EST: af08h02.s1 Soares testis NHT Homo      | 3273.7935 |
| 2606 | Z75190_s_at_NA_illumina      | Apolipoprotein E receptor 2                 | 3274.1191 |
| 2607 | U02031_at_GI_27477112-S      | Sterol regulatory element binding protein-2 | 3274.2144 |
| 2608 | W26097_at_NA_illumina        | EST: 22f1 Human retina cDNA randomly        | 3274.2878 |
| 2609 | AA233107_at_NA_illumina      | Homo sapiens Smad6 mRNA, complete           | 3274.3513 |
| 2610 | D87127_at_GI_14602425-S      | Translocation protein-1                     | 3274.5173 |
| 2611 | X90857_at_GI_6912301-S       | -14 gene, containing globin regulatory      | 3274.6516 |

|      |                                |                                               |           |
|------|--------------------------------|-----------------------------------------------|-----------|
| 2612 | AA405288_at_GI_42661300-S      | EST: zt37f09.r1 Soares ovary tumor            | 3274.6519 |
| 2613 | D88213_at_GI_6806880-A         | Retina-specific amine oxidase                 | 3274.7166 |
| 2614 | D88213_at-2_NA_illumina        | Amine oxidase, copper containing 2 (retina-   | 3274.7166 |
| 2615 | HG4236-HT4506_f_at_NA_illumina | Zinc Finger Protein Znf138                    | 3274.763  |
| 2616 | U15128_at_NA_illumina          | Beta-1,2-N-acetylglucosaminyltransferase      | 3275.1685 |
| 2617 | U15128_at-2_NA_illumina        | Human beta-1,2-N-                             | 3275.1685 |
| 2618 | S57160_s_at_NA_illumina        | Retinoblastoma-binding protein 1              | 3275.1765 |
| 2619 | T66266_at_NA_illumina          | Human clone 23909 mRNA, partial cds           | 3275.2407 |
| 2620 | RC_AA255886_at_GI_34147547-S   | EST: zs19f01.s1 NCI_CGAP_GCB1 Homo            | 3275.4504 |
| 2621 | AA173505_at_NA_illumina        | EST: zp02c06.r1 Stratagene ovarian            | 3275.4556 |
| 2622 | HG4073-HT4343_at_NA_illumina   | Cytosolic Acetoacetyl-Coenzyme A              | 3275.4834 |
| 2623 | L41559_at_NA_illumina          | PCBD 6-pyruvoyl-tetrahydropterin              | 3275.5254 |
| 2624 | RC_AA010540_at_NA_illumina     | EST: ze18c10.s1 Soares fetal heart            | 3275.6047 |
| 2625 | L34219_at_GI_38201694-S        | RLBP1 Cellular retinaldehyde-binding          | 3275.9343 |
| 2626 | RC_AA063598_at_NA_illumina     | EST: ze87d02.s1 Soares fetal heart            | 3275.9573 |
| 2627 | X05153_rna1_at_GI_4504946-S    | Alpha-lactalbumin precursor gene              | 3276.0955 |
| 2628 | X17059_s_at_GI_42741670-S      | AAC1 Arylamine N-acetyltransferase, liver     | 3276.33   |
| 2629 | S66427_s_at_NA_illumina        | Retinoblastoma-binding protein 1              | 3276.3745 |
| 2630 | U89995_at-2_NA_illumina        | Forkhead (Drosophila)-like 15                 | 3276.44   |
| 2631 | U89995_at_GI_21618324-S        | DNA binding protein FKHL15 (FKHL15)           | 3276.44   |
| 2632 | X83416_s_at_GI_34335269-A      | PrP gene, exon 2                              | 3276.5444 |
| 2633 | K03183_f_at_NA_illumina        | Chorionic gonadotropin beta subunit gene      | 3276.8645 |
| 2634 | U63825_at_GI_5803004-S         | Hepatitis delta antigen interacting protein A | 3277.1152 |
| 2635 | M24351_cds2_at_NA_illumina     | PTH1H gene (parathyroid hormone-like          | 3277.136  |
| 2636 | D86985_at_GI_29729553-S        | KIAA0232 gene                                 | 3277.155  |
| 2637 | U85510_at_GI_14589949-S        | RNA polymerase II subunit hsRBP4              | 3277.226  |
| 2638 | D87683_at_GI_24475626-S        | KIAA0243 gene, partial cds                    | 3277.2847 |
| 2639 | AA093998_at_GI_7661531-S       | EST: cl1542.seq.F Fetal heart, Lambda         | 3277.4294 |
| 2640 | Z48579_at_GI_4557250-S         | Disintegrin-metalloprotease (partial)         | 3277.4514 |
| 2641 | X51688_at_GI_16950653-S        | CCNA Cyclin A                                 | 3277.4973 |
| 2642 | RC_AA456599_at_GI_5730103-S    | EST: zx75a07.s1 Soares ovary tumor            | 3277.5557 |
| 2643 | U33822_at_GI_4505064-S         | Tax1-binding protein TXBP181 mRNA             | 3277.5767 |
| 2644 | RC_AA487228_at_NA_illumina     | EST: ab19h12.s1 Stratagene lung               | 3277.6577 |
| 2645 | AA083797_s_at_NA_illumina      | Zm63c02.r1 Stratagene fibroblast              | 3277.8677 |
| 2646 | AA009913_at_NA_illumina        | Diphtheria toxin resistance protein required  | 3277.9429 |
| 2647 | U40038_at_GI_40254461-S        | GNAQ Guanine nucleotide binding protein       | 3278.065  |
| 2648 | RC_AA005308_at_NA_illumina     | EST: zh93e11.s1 Soares fetal liver spleen     | 3278.2354 |
| 2649 | X63629_at_GI_45269142-S        | CDH3 Cadherin 3 (P-cadherin)                  | 3278.4338 |
| 2650 | RC_AA410954_at_NA_illumina     | EST: zv39g09.s1 Soares ovary tumor            | 3278.4714 |
| 2651 | RC_AA405263_at_NA_illumina     | EST: zt06f10.s1 NCI_CGAP_GCB1 Homo            | 3278.4993 |
| 2652 | X52142_at_GI_4503132-S         | CTPS CTP synthetase                           | 3278.9866 |
| 2653 | D25217_at_GI_21237729-A        | KIAA0027 gene, partial cds                    | 3279.0137 |
| 2654 | U71087_at_NA_illumina          | Protein tyrosine kinase t-Ror1 (Ror1)         | 3279.0295 |

|      |                              |                                            |           |
|------|------------------------------|--------------------------------------------|-----------|
| 2655 | C02352_s_at_GI_7705589-S     | EST: HUMGS0008889, Human Gene              | 3279.0833 |
| 2656 | AA382450_at_NA_illumina      | GDP dissociation inhibitor 2               | 3279.096  |
| 2657 | RC_D11544_at_GI_31343495-S   | EST: Human HepG2 3'-directed Mbol          | 3279.1675 |
| 2658 | RC_AA620885_at_NA_illumina   | EST: af95g06.s1 Soares testis NHT Homo     | 3279.411  |
| 2659 | U34877_at_GI_40353771-S      | Biliverdin-IXalpha reductase mRNA          | 3279.4373 |
| 2660 | S75168_rna1_at_GI_21450843-A | Matk=megakaryocyte-associated tyrosine     | 3279.4778 |
| 2661 | L01042_at-2_NA_illumina      | Human HIV1 tata element modulatory         | 3279.479  |
| 2662 | L01042_at_GI_6005903-S       | TATA element modulatory factor mRNA        | 3279.479  |
| 2663 | J04739_at_GI_4502446-S       | BPI Bactericidal/permeability-increasing   | 3280.036  |
| 2664 | RC_AA148539_at_NA_illumina   | EST: zI06e05.s1 Soares pregnant uterus     | 3280.0703 |
| 2665 | X66363_at_GI_15011927-A      | SERINE/THREONINE-PROTEIN KINASE            | 3280.2153 |
| 2666 | X68742_at_GI_31657141-S      | Integrin, alpha subunit                    | 3280.2856 |
| 2667 | AA418444_at_NA_illumina      | EST: zv92a04.r1 Soares NhHMPu S1           | 3280.4233 |
| 2668 | AA316862_at_NA_illumina      | Homo sapiens mRNA for pre-mRNA             | 3280.5227 |
| 2669 | RC_AA401258_at_NA_illumina   | EST: zv66h04.s1 Soares total fetus         | 3281.03   |
| 2670 | M33317_f_at_GI_15147327-A    | CYP2A7 Cytochrome P450, subfamily IIA      | 3281.1523 |
| 2671 | X99101_at-2_NA_illumina      | Estrogen receptor 2 (ER beta)              | 3281.1555 |
| 2672 | X99101_at_GI_10835012-S      | ESR Estrogen receptor                      | 3281.1555 |
| 2673 | AA093875_at_GI_40255242-S    | Homo sapiens 45kDa splicing factor         | 3281.4766 |
| 2674 | RC_AA035546_at_GI_21269867-S | EST: ze24c07.s1 Soares fetal heart         | 3281.5447 |
| 2675 | U88726_at_GI_4759195-S       | Symplekin mRNA, partial cds                | 3281.5598 |
| 2676 | M16707_rna1_s_at_NA_illumina | Histone H4 gene, clone FO108               | 3281.8477 |
| 2677 | RC_D59299_i_at_NA_illumina   | EST: Human fetal brain cDNA 3'-end GEN-    | 3281.8767 |
| 2678 | U72621_at_GI_37622889-A      | LOT1 mRNA                                  | 3282.0645 |
| 2679 | L13744_at_NA_illumina        | AF-9 PROTEIN                               | 3282.1602 |
| 2680 | M95809_at_GI_19923304-S      | BASIC TRANSCRIPTION FACTOR 62 KD           | 3282.4697 |
| 2681 | RC_AA001049_at_NA_illumina   | EST: ze47c08.s1 Soares retina N2b4HR       | 3282.5535 |
| 2682 | D38037_at_GI_17149840-A      | FK-506 binding protein (fkbp12.6) gene     | 3282.724  |
| 2683 | X91103_at-2_NA_illumina      | H.sapiens mRNA for Hr44 protein            | 3282.7815 |
| 2684 | X91103_at_NA_illumina        | Hr44 protein                               | 3282.7815 |
| 2685 | R11604_at_GI_13194196-S      | Yf47c10.r1 Homo sapiens cDNA clone         | 3282.7964 |
| 2686 | X75315_at_GI_34577104-A      | FAU Finkel-Biskis-Reilly murine sarcoma    | 3282.9978 |
| 2687 | X63454_at_GI_10337586-S      | Hst-2 (FGF-6) mRNA                         | 3283.314  |
| 2688 | X01059_at_GI_19923125-S      | GNRH Gonadotropin-releasing hormone        | 3283.4019 |
| 2689 | RC_AA232215_at_GI_31342325-S | EST: zr25d09.s1 Stratagene NT2 neuronal    | 3283.4712 |
| 2690 | M74558_at_GI_4506958-S       | SIL mRNA                                   | 3283.52   |
| 2691 | U03644_at-2_NA_illumina      | Human recepin mRNA, complete cds.          | 3283.5312 |
| 2692 | U03644_at_GI_40068058-S      | Recepin mRNA                               | 3283.5312 |
| 2693 | AA427510_at_GI_8922197-S     | EST: zw26d03.r1 Soares ovary tumor         | 3283.538  |
| 2694 | L39061_at_GI_21536364-S      | Transcription factor SL1 mRNA, partial cds | 3283.9111 |
| 2695 | D83032_at_NA_illumina        | Nuclear protein, NP220                     | 3284.2876 |
| 2696 | N75215_s_at_NA_illumina      | EST: yw33h05.r1 Homo sapiens cDNA          | 3284.4568 |
| 2697 | U73338_at_GI_4557764-S       | Methionine synthase mRNA                   | 3284.5496 |

|      |                                |                                              |           |
|------|--------------------------------|----------------------------------------------|-----------|
| 2698 | AA242887_at_NA_illumina        | EST: zr64g02.r1 Soares NhHMPu S1             | 3284.5798 |
| 2699 | M10612_at_GI_32130517-S        | APOC2 Apolipoprotein C-II                    | 3284.6501 |
| 2700 | M28211_at_GI_19923259-S        | RAS-RELATED PROTEIN RAB-4A                   | 3285.0464 |
| 2701 | AA476801_at_NA_illumina        | EST: zw95c04.r1 Soares total fetus           | 3285.0837 |
| 2702 | AF002256_f_at_NA_illumina      | Homo sapiens killer cell receptor (KIR103)   | 3285.1482 |
| 2703 | U30930_at_GI_40254470-S        | CGT UDP-galactose ceramide galactosyl        | 3285.4153 |
| 2704 | U45880_at_GI_40795672-S        | X-linked inhibitor of apoptosis protein XIAP | 3285.446  |
| 2705 | AA136382_s_at_GI_13375675-S    | EST: zn89a06.r1 Stratagene lung              | 3285.522  |
| 2706 | HG3638-HT3993_s_at_NA_illumina | Amyloid Beta (A4) Precursor Protein, Alt.    | 3285.5935 |
| 2707 | RC_AA045342_at_NA_illumina     | EST: zk59g01.s1 Soares pregnant uterus       | 3285.8047 |
| 2708 | W78910_at_NA_illumina          | EST: zh51f09.r1 Soares fetal liver spleen    | 3285.809  |
| 2709 | RC_AA450106_at_NA_illumina     | EST: zx42d08.s1 Soares total fetus           | 3285.9805 |
| 2710 | L38969_at_GI_40317629-S        | Thrombospondin 3 (THBS3) gene                | 3286.078  |
| 2711 | RC_AA412036_at_GI_5031958-S    | Homo sapiens antigen NY-CO-10 (NY-CO-        | 3286.1128 |
| 2712 | HG2167-HT2237_at_NA_illumina   | Protein Kinase Ht31, Camp-Dependent          | 3286.5203 |
| 2713 | X66114_rna1_at_GI_34147649-S   | 2-oxoglutarate carrier protein               | 3286.532  |
| 2714 | X54938_at_GI_4504788-S         | ITPKA Inositol 1,4,5-trisphosphate 3-        | 3286.5906 |
| 2715 | X60299_s_at_NA_illumina        | KALLMANN SYNDROME PROTEIN                    | 3286.7068 |
| 2716 | RC_AA459412_at_GI_40254937-S   | EST: zx89h01.s1 Soares ovary tumor           | 3286.8118 |
| 2717 | RC_AA132258_at_GI_22538483-S   | EST: zo28a11.s1 Stratagene colon             | 3286.9397 |
| 2718 | D86971_at_NA_illumina          | KIAA0217 gene, partial cds                   | 3287.2134 |
| 2719 | RC_AA435624_at_GI_42660137-S   | EST: zt74f10.s1 Soares testis NHT Homo       | 3287.2678 |
| 2720 | HG2573-HT2669_at_NA_illumina   | Zinc Finger Protein Kup (Gb:X16576)          | 3287.3528 |
| 2721 | AA427694_at_NA_illumina        | YY1 transcription factor                     | 3287.3647 |
| 2722 | X84908_at_GI_4505782-S         | Phosphorylase-kinase, beta subunit           | 3287.6655 |
| 2723 | RC_AA398648_at_NA_illumina     | Conserved helix-loop-helix ubiquitous        | 3287.7524 |
| 2724 | RC_AA160945_at_NA_illumina     | EST: zq40e10.s1 Stratagene hNT neuron        | 3287.7834 |
| 2725 | R81773_at_NA_illumina          | EST: yj05h02.r1 Homo sapiens cDNA            | 3288.0913 |
| 2726 | AA165144_f_at_GI_42660301-S    | EST: zo94e09.r1 Stratagene ovarian           | 3288.3413 |
| 2727 | RC_AA293774_at_NA_illumina     | EST: zt56g02.s1 Soares ovary tumor           | 3288.492  |
| 2728 | RC_AA074729_at_NA_illumina     | EST: zm85b05.s1 Stratagene ovarian           | 3288.5203 |
| 2729 | R09049_at_GI_40254890-S        | EST: yf21a09.r1 Homo sapiens cDNA            | 3288.5427 |
| 2730 | U79242_at_NA_illumina          | Clone 23560 mRNA sequence                    | 3288.6157 |
| 2731 | M13241_at_GI_34147496-S        | N-MYC PROTO-ONCOGENE PROTEIN                 | 3288.6228 |
| 2732 | RC_AA427944_at_NA_illumina     | EST: zw53d11.s1 Soares total fetus           | 3288.634  |
| 2733 | RC_AA449469_at_GI_11545770-S   | EST: zx08f04.s1 Soares total fetus           | 3288.6409 |
| 2734 | RC_AA432386_s_at_NA_illumina   | Human mRNA for KIAA0073 gene, partial        | 3288.7256 |
| 2735 | D38024_at_NA_illumina          | Facioscapulohumeral muscular dystrophy       | 3288.818  |
| 2736 | H15219_at_NA_illumina          | EST: ym30f02.r1 Homo sapiens cDNA            | 3288.8264 |
| 2737 | D87459_at_GI_4507912-S         | KIAA0269 gene                                | 3288.9104 |
| 2738 | RC_AA281743_r_at_NA_illumina   | EST: zt06h05.s1 NCI_CGAP_GCB1 Homo           | 3288.9556 |
| 2739 | R77159_at_NA_illumina          | EST: yi65a07.r1 Homo sapiens cDNA            | 3288.9675 |
| 2740 | U37426_at_GI_13699823-S        | Kinesin-like spindle protein HKSP (HKSP)     | 3289.2725 |



|      |                                |                                            |           |
|------|--------------------------------|--------------------------------------------|-----------|
| 2741 | X63753_at_GI_21040319-A        | SON SON DNA binding protein                | 3289.3643 |
| 2742 | IKAROS_at_NA_illumina          | No description for gene: IKAROS_at         | 3289.5242 |
| 2743 | RC_AA227910_at_GI_13375724-S   | EST: zr57d11.s1 Soares NhHMPu S1           | 3289.618  |
| 2744 | AA047791_at_GI_24308425-S      | EST: zf49d06.r1 Soares retina N2b4HR       | 3289.7214 |
| 2745 | U62432_at_NA_illumina          | CHRNA3 Cholinergic receptor, nicotinic,    | 3289.7566 |
| 2746 | U62432_at-2_NA_illumina        | Cholinergic receptor, nicotinic, alpha     | 3289.7566 |
| 2747 | RC_AA016292_at_GI_37542932-S   | EST: ze38c02.s1 Soares retina N2b4HR       | 3289.8416 |
| 2748 | U10362_at_GI_5803022-S         | GP36b glycoprotein mRNA                    | 3289.866  |
| 2749 | RC_AA236853_at_NA_illumina     | EST: zs01b04.s1 NCI_CGAP_GCB1              | 3289.8767 |
| 2750 | RC_AA226968_at_GI_34222315-S   | EST: zr18g03.s1 Stratagene NT2 neuronal    | 3289.9294 |
| 2751 | U27459_at_GI_32454751-S        | Origin recognition complex protein 2       | 3290.0474 |
| 2752 | RC_D59474_i_at_NA_illumina     | Calpastatin                                | 3290.0476 |
| 2753 | D83838_at_NA_illumina          | EST: similar to protein Nterminal          | 3290.3235 |
| 2754 | W26762_s_at_GI_13376618-S      | EST: 12d8 Human retina cDNA randomly       | 3290.3838 |
| 2755 | HG3992-HT4262_at_NA_illumina   | Cpg-Enriched Dna, Clone E35                | 3290.4236 |
| 2756 | M21494_at_GI_21536287-S        | CKM Creatine kinase, muscle                | 3290.4688 |
| 2757 | X59711_at_GI_31083218-A        | NFYA Nuclear transcription factor Y, alpha | 3290.5168 |
| 2758 | AA092469_at_NA_illumina        | EST: ll5143.seq.F Fetal heart, Lambda      | 3290.587  |
| 2759 | D14826_s_at_GI_34335205-I      | CREM CAMP responsive element               | 3290.6724 |
| 2760 | X91249_at_GI_8051576-A         | WHITE PROTEIN HOMOLOG                      | 3290.7207 |
| 2761 | D84361_at_GI_21314678-S        | P52 and p64 isoforms of N-Shc              | 3290.853  |
| 2762 | X55544_at_GI_38261963-S        | CYCLIC-AMP-DEPENDENT                       | 3291.113  |
| 2763 | D87716_s_at_NA_illumina        | KIAA0007 gene, partial cds                 | 3291.2056 |
| 2764 | AA279633_at_NA_illumina        | EST: zs86h10.r1 NCI_CGAP_GCB1 Homo         | 3291.4375 |
| 2765 | U83843_at_GI_5453606-S         | HIV-1 Nef interacting protein (Nip7-1)     | 3291.4966 |
| 2766 | HG2380-HT2476_s_at_NA_illumina | Adp-Ribosylarginine Hydrolase              | 3291.7144 |
| 2767 | R97591_at_NA_illumina          | EST: yq59b08.r1 Homo sapiens cDNA          | 3291.7666 |
| 2768 | X55448_cds2_at_GI_13324681-S   | 2-19 gene (2-19 protein) extracted from    | 3292.024  |
| 2769 | AA476518_at_GI_39930603-S      | EST: zx02a12.r1 Soares total fetus         | 3292.129  |
| 2770 | M64240_s_at_NA_illumina        | MAX protein                                | 3292.8179 |
| 2771 | U32324_at_GI_22212921-A        | Interleukin 11 receptor isoform            | 3292.866  |
| 2772 | U81599_at_GI_14141190-S        | Homeodomain protein HOXB13 mRNA            | 3292.8809 |
| 2773 | X97335_at_NA_illumina          | Kinase A anchor protein                    | 3292.8845 |
| 2774 | H43790_at_NA_illumina          | Plakophilin 2                              | 3292.9966 |
| 2775 | RC_AA456031_at_GI_20336197-A   | A-kinase anchor protein 18                 | 3293.0386 |
| 2776 | M19878_at_GI_5579451-S         | Calbindin 27 gene, exons 1 and 2, and Alu  | 3293.1086 |
| 2777 | X78711_at_NA_illumina          | Glycerol kinase testis specific 1          | 3293.15   |
| 2778 | L41147_at_GI_4504544-S         | 5-HT6 serotonin receptor mRNA              | 3293.1736 |
| 2779 | AA481308_at_NA_illumina        | EST: zv06a05.r1 Soares NhHMPu S1           | 3293.2542 |
| 2780 | D83702_at_GI_19923246-S        | Brain mRNA for photolyase homolog          | 3293.334  |
| 2781 | U44103_at_GI_34147553-S        | Small GTP binding protein Rab9 mRNA        | 3293.3584 |
| 2782 | T30407_at_NA_illumina          | EST: EST16114 Homo sapiens cDNA 5'         | 3293.3604 |
| 2783 | L02870_s_at_GI_17738300-S      | Collagen, type VII, alpha 1 (epidermolysis | 3293.362  |

|      |                              |                                             |           |
|------|------------------------------|---------------------------------------------|-----------|
| 2784 | X78416_s_at_GI_4503084-S     | CSN1 Casein, alpha S1                       | 3293.3904 |
| 2785 | RC_AA489041_at_NA_illumina   | EST: aa56d04.s1 NCI_CGAP_GCB1               | 3293.5    |
| 2786 | U76272_at_GI_4503718-S       | FHIT Fragile histidine triad gene product   | 3293.657  |
| 2787 | D84276_at_GI_38454325-S      | CD38 CD38 antigen (p45)                     | 3293.7117 |
| 2788 | Z95624_at_NA_illumina        | DNA sequence from cosmid U237H1             | 3293.7207 |
| 2789 | W27327_at_NA_illumina        | EST: 27e5 Human retina cDNA randomly        | 3294.0276 |
| 2790 | RC_AA418610_at_GI_20544128-S | EST: zv93h06.s1 Soares NhHMPu S1            | 3294.1987 |
| 2791 | M27819_at_GI_4507020-S       | SLC4A1 Solute carrier family 4, anion       | 3294.395  |
| 2792 | RC_AA453430_at_NA_illumina   | EST: zx32g09.s1 Soares total fetus          | 3294.4124 |
| 2793 | M94633_at_GI_28629867-S      | Recombination activating protein (RAG2)     | 3294.71   |
| 2794 | L34355_at_GI_4506910-S       | (clone p4) 50 kD dystrophin-associated      | 3294.7334 |
| 2795 | D86961_at_GI_32698675-S      | KIAA0206 gene, partial cds                  | 3294.7568 |
| 2796 | U40572_at_GI_18860909-A      | Beta2-syntrophin (SNT B2) mRNA              | 3294.7876 |
| 2797 | M65254_at_GI_32455243-A      | PPP2R1B Protein phosphatase 2 (formerly     | 3294.799  |
| 2798 | M65254_at-2_NA_illumina      | Protein phosphatase 2 (formerly 2A),        | 3294.799  |
| 2799 | D63940_s_at_GI_18641367-A    | Mxi1 protein                                | 3294.843  |
| 2800 | AA216282_at_GI_18087810-S    | EST: hp0863.seq.F Fetal heart, Lambda       | 3294.9517 |
| 2801 | R88880_at_GI_17530790-S      | EST: ym96h06.r1 Homo sapiens cDNA           | 3295.0442 |
| 2802 | RC_AA262881_at_GI_34147352-S | EST: zs26b03.s1 NCI_CGAP_GCB1               | 3295.1553 |
| 2803 | U68485_at_GI_21536416-A      | Amphiphysin II mRNA                         | 3295.3345 |
| 2804 | AA405119_at_NA_illumina      | EST: zu65c11.r1 Soares testis NHT Homo      | 3295.4868 |
| 2805 | AA406000_at_NA_illumina      | EST: zu56g05.r1 Soares ovary tumor          | 3295.6987 |
| 2806 | L49209_s_at_NA_illumina      | Retinoblastoma susceptibility protein       | 3295.7266 |
| 2807 | RC_AA029818_at_GI_45120112-S | EST: zk07f11.s1 Soares pregnant uterus      | 3296.0095 |
| 2808 | Y13153_at_GI_4504890-S       | Kynurenine 3-monooxygenase                  | 3296.0115 |
| 2809 | Y00285_s_at_GI_4504610-S     | IGF2R Insulin-like growth factor 2 receptor | 3296.1475 |
| 2810 | Z54367_s_at_NA_illumina      | Plectin                                     | 3296.193  |
| 2811 | L35592_at_NA_illumina        | Germline mRNA sequence                      | 3296.292  |
| 2812 | AA100359_at_NA_illumina      | EST: zn46a05.r1 Stratagene HeLa cell s3     | 3296.3542 |
| 2813 | RC_AA018700_at_NA_illumina   | EST: ze54e06.s1 Soares retina N2b4HR        | 3296.6472 |
| 2814 | C01803_r_at_NA_illumina      | EST: HUMGS0003762, Human Gene               | 3296.7012 |
| 2815 | W16684_at_NA_illumina        | EST: zb08f10.r1 Soares fetal lung           | 3296.9456 |
| 2816 | L36529_at_GI_4826881-S       | (clone N5-4) protein p84 mRNA               | 3296.9924 |
| 2817 | U08096_at_NA_illumina        | Peripheral myelin protein-22 (PMP22)        | 3297.0432 |
| 2818 | M27691_at_GI_22219459-A      | CAMP-RESPONSE ELEMENT BINDING               | 3297.07   |
| 2819 | Y00978_at_GI_31711991-S      | GAPD Glyceraldehyde-3-phosphate             | 3297.0996 |
| 2820 | M29386_s_at_GI_40254429-S    | PRL Prolactin                               | 3297.145  |
| 2821 | RC_AA609253_at_GI_5803001-S  | Homo sapiens chloride channel protein       | 3297.206  |
| 2822 | U03886_at_NA_illumina        | GS2 mRNA                                    | 3297.2676 |
| 2823 | M16973_at_GI_4557390-S       | C8B Complement component 8, beta            | 3297.3381 |
| 2824 | AA025333_at_GI_42476197-S    | EST: ze76b01.r1 Soares fetal heart          | 3297.3623 |
| 2825 | L09235_at_GI_19913423-S      | ATP6A1 ATPase, H+ transporting,             | 3297.465  |
| 2826 | AA306135_at_GI_21327686-A    | EST: EST177114 Jurkat T-cells VI Homo       | 3297.6565 |

|      |                                |                                                       |           |
|------|--------------------------------|-------------------------------------------------------|-----------|
| 2827 | AA418662_at_NA_illumina        | EST: zv93h02.r1 Soares NhHMPu S1                      | 3297.7302 |
| 2828 | D80010_at_GI_22027647-S        | KIAA0188 gene, partial cds                            | 3297.8135 |
| 2829 | M10943_at_GI_28866946-S        | Metallothionein-I $\epsilon$ gene (hMT-I $\epsilon$ ) | 3297.8147 |
| 2830 | RC_AA490237_at_GI_31745179-S   | EST: aa44a02.s1 Soares NhHMPu S1                      | 3297.8213 |
| 2831 | U37055_ma1_s_at_NA_illumina    | Hepatocyte growth factor-like protein gene            | 3298.0813 |
| 2832 | AA016987_at_NA_illumina        | EST: ze33c05.r1 Soares retina N2b4HR                  | 3298.3682 |
| 2833 | AA305116_at_NA_illumina        | EST176117 Colon carcinoma (Caco-2) cell               | 3298.5652 |
| 2834 | AA094744_at_GI_23397426-S      | Homo sapiens RRM RNA binding protein                  | 3298.8376 |
| 2835 | RC_AA256552_s_at_NA_illumina   | EST: zr86f01.s1 Soares NhHMPu S1                      | 3298.9028 |
| 2836 | W56517_s_at_GI_31341691-S      | EST: zd16d01.r1 Soares fetal heart                    | 3298.9448 |
| 2837 | HG945-HT945_s_at_NA_illumina   | Nucleic Acid-Binding Protein (Gb:L12693)              | 3299.0156 |
| 2838 | RC_AA417970_at_NA_illumina     | EST: zv97c03.s1 Soares NhHMPu S1                      | 3299.0774 |
| 2839 | RC_AA610045_at_GI_14149652-S   | Homo sapiens torsinB (DQ1) mRNA,                      | 3299.3179 |
| 2840 | X64878_at_GI_32307151-S        | OXTR Oxytocin receptor                                | 3299.5457 |
| 2841 | RC_AA233711_at_NA_illumina     | EST: zr47e11.s1 Soares NhHMPu S1                      | 3299.5972 |
| 2842 | X14813_at_GI_6598316-S         | ACAA Acetyl-Coenzyme A acyltransferase                | 3299.675  |
| 2843 | U13948_at_GI_4757725-S         | Zinc finger/leucine zipper protein (AF10)             | 3299.7925 |
| 2844 | RC_AA057640_at_NA_illumina     | Neuropilin 2                                          | 3299.8967 |
| 2845 | AF014958_at-2_NA_illumina      | Chemokine receptor                                    | 3299.9163 |
| 2846 | AF014958_at_GI_40805833-S      | Chemokine receptor X (CKRX) mRNA                      | 3299.9163 |
| 2847 | U07139_at_NA_illumina          | CAB3b mRNA for calcium channel beta3                  | 3299.9207 |
| 2848 | W37319_at_NA_illumina          | EST: zc11f08.r1 Soares parathyroid tumor              | 3300.0618 |
| 2849 | M11973_cds1_at_GI_13376999-S   | Gamma-B-crystallin gene (gamma 1-2)                   | 3300.1292 |
| 2850 | X13100_s_at_GI_11342671-S      | MYH3 Myosin, heavy polypeptide 3,                     | 3300.2341 |
| 2851 | RC_AA458975_at_GI_30089931-A   | EST: zx88g10.s1 Soares ovary tumor                    | 3300.756  |
| 2852 | X79984_at_GI_5453735-S         | AA1 mRNA                                              | 3300.8    |
| 2853 | AA075869_at_NA_illumina        | EST: zm75a10.r1 Stratagene                            | 3301.2036 |
| 2854 | RC_AA424406_at_NA_illumina     | EST: zv82g01.s1 Soares total fetus                    | 3301.5188 |
| 2855 | RC_AA398937_at_NA_illumina     | EST: zt86e06.s1 Soares testis NHT Homo                | 3301.7788 |
| 2856 | W25607_at_NA_illumina          | EST: zc64c06.r1 Soares fetal heart                    | 3301.7832 |
| 2857 | U71300_at_GI_4507104-S         | SNAPC3 Small nuclear RNA activating                   | 3301.9116 |
| 2858 | RC_AA010187_s_at_GI_35493922-S | Homo sapiens KIAA0402 mRNA, partial                   | 3301.95   |
| 2859 | RC_AA001865_at_NA_illumina     | EST: zh85h12.s1 Soares fetal liver spleen             | 3301.9656 |
| 2860 | RC_AA081457_at_NA_illumina     | Dystonia 1, torsion (autosomal dominant)              | 3302.035  |
| 2861 | X15673_s_at_NA_illumina        | PTR2 mRNA for repetitive sequence                     | 3302.0647 |
| 2862 | M95724_at_GI_4502778-S         | CENPC Centromere autoantigen C                        | 3302.0867 |
| 2863 | M95724_at-2_NA_illumina        | Centromere protein C 1                                | 3302.0867 |
| 2864 | AA279513_at_NA_illumina        | EST: zs87g12.r1 NCI_CGAP_GCB1 Homo                    | 3302.1086 |
| 2865 | X98172_at_GI_15718711-A        | MACH-alpha-2 protein                                  | 3302.1282 |
| 2866 | AA430447_at_NA_illumina        | EST: zw20f09.r1 Soares ovary tumor                    | 3302.1733 |
| 2867 | AA459545_f_at_GI_21902536-S    | EST: zx89d12.r1 Soares ovary tumor                    | 3302.231  |
| 2868 | AFFX-BioC-5_at-2_NA_illumina   | AFFX-BioC-5_at (miscellaneous control -               | 3302.3188 |
| 2869 | AFFX-BioC-5_at_NA_illumina     | AFFX-BioC-5_at (endogenous control)                   | 3302.3188 |

|      |                                |                                             |           |
|------|--------------------------------|---------------------------------------------|-----------|
| 2870 | M60725_s_at_NA_illumina        | Ribosomal protein S6 kinase, 70kD,          | 3302.402  |
| 2871 | M60614_at_GI_19743572-S        | WT1 Wilms tumor 1                           | 3302.41   |
| 2872 | M64752_at_GI_6552333-S         | GRIA1 Glutamate receptor, ionotropic,       | 3302.4148 |
| 2873 | U40571_at_NA_illumina          | SNT1 Syntrophin, alpha (dystrophin-         | 3302.4795 |
| 2874 | RC_AA393793_at_NA_illumina     | EST: zv64a10.s1 Soares total fetus          | 3302.5515 |
| 2875 | X12453_at_GI_10880124-S        | S-ARRESTIN                                  | 3302.6409 |
| 2876 | RC_AA235641_at_NA_illumina     | EST: zt36e07.s1 Soares ovary tumor          | 3302.88   |
| 2877 | RC_AA058951_at_GI_34147509-S   | EST: zl96f07.s1 Stratagene corneal stroma   | 3303.0117 |
| 2878 | RC_AA040882_at_NA_illumina     | Prp8, U5 snRNP-specific 40 kDa protein      | 3303.1238 |
| 2879 | T87593_at_NA_illumina          | EST: yd85c09.r1 Homo sapiens cDNA           | 3303.2715 |
| 2880 | W36294_at_NA_illumina          | EST: HFBEST-71 Human fetal brain            | 3303.363  |
| 2881 | T50542_at_NA_illumina          | Yb30d02.r1 Homo sapiens cDNA clone          | 3303.7258 |
| 2882 | M36118_s_at_GI_31542869-S      | GRANZYME H PRECURSOR                        | 3303.7317 |
| 2883 | D63487_at_GI_11056035-S        | KIAA0153 gene, partial cds                  | 3303.7458 |
| 2884 | U22961_s_at_GI_8392890-S       | mRNA clone with similarity to L-glycerol-3- | 3303.8394 |
| 2885 | RC_AA423854_at_GI_21361958-S   | EST: zv79c03.s1 Soares total fetus          | 3303.9973 |
| 2886 | AA247903_at_NA_illumina        | EST: j5812.seq.F Human fetal heart,         | 3304.125  |
| 2887 | S38742_s_at_GI_19923318-S      | HOX11 Homeo box 11 (T-cell lymphoma 3-      | 3304.2642 |
| 2888 | U84720_at_GI_18105052-S        | mRNA export protein Rae1 (RAE1) mRNA        | 3304.4814 |
| 2889 | RC_AA284836_at_GI_41150782-S   | EST: zt22a05.s1 Soares ovary tumor          | 3304.5034 |
| 2890 | M31651_at_GI_7382459-S         | SHBG Sex hormone-binding globulin           | 3304.6035 |
| 2891 | L39064_rna1_at_NA_illumina     | Interleukin 9 receptor (IL9R) gene          | 3304.613  |
| 2892 | RC_AA418740_at_GI_32964824-S   | EST: zv98e10.s1 Soares NhHMPu S1            | 3304.7546 |
| 2893 | Z11685_s_at_NA_illumina        | RNA helicase                                | 3304.9226 |
| 2894 | RC_AA018409_at_GI_37675282-S   | EST: ze51g02.s1 Soares retina N2b4HR        | 3304.9402 |
| 2895 | RC_AA258189_at_GI_21361652-S   | EST: zs33a04.s1 NCI_CGAP_GCB1               | 3305.2214 |
| 2896 | M88461_s_at_NA_illumina        | NPY1R Neuropeptide Y receptor Y1            | 3305.224  |
| 2897 | X95677_at_NA_illumina          | ArgBPIB protein                             | 3305.2837 |
| 2898 | U49742_at_GI_7262389-S         | Rhodopsin gene                              | 3305.5217 |
| 2899 | RC_AA404426_at_GI_18379326-S   | Homo sapiens snurportin1 mRNA,              | 3305.531  |
| 2900 | S42303_at_GI_14589888-S        | CDH2 Cadherin 2, N-cadherin (neuronal)      | 3305.7285 |
| 2901 | X02751_at_GI_6006027-S         | NRAS Neuroblastoma RAS viral (v-ras)        | 3305.7498 |
| 2902 | L02648_at_GI_21071009-S        | TCN2 Transcobalamin II                      | 3305.8174 |
| 2903 | RC_AA004521_at_GI_42476323-S   | Prostate cancer overexpressed gene 1        | 3305.8657 |
| 2904 | RC_AA223284_at_GI_20127526-S   | EST: zr08c04.s1 Stratagene NT2 neuronal     | 3305.9587 |
| 2905 | U40763_s_at_GI_42560243-S      | Clk-associated RS cyclophilin CARS-Cyp      | 3305.9617 |
| 2906 | AA478512_at_GI_19923324-S      | Homo sapiens EVI5 homolog mRNA,             | 3305.9995 |
| 2907 | RC_AA349915_at_GI_32454736-A   | Homo sapiens brain expressed ring finger    | 3306.18   |
| 2908 | J00146_at_NA_illumina          | DHFRP1 Dihydrofolate reductase              | 3306.2285 |
| 2909 | HG3141-HT3317_f_at_NA_illumina | Nadh-Ubiquinone Oxidoreductase, 39 Kda      | 3306.3538 |
| 2910 | X68264_rna1_at_NA_illumina     | MUC18 gene (melanoma associated             | 3306.5415 |
| 2911 | RC_AA398412_at_NA_illumina     | EST: zt61g08.s1 Soares testis NHT Homo      | 3306.6138 |
| 2912 | HG25930-HT26386_at_NA_illumina | Estradiol 17-beta dehydrogenase 1           | 3306.6523 |

|      |                                |                                          |           |
|------|--------------------------------|------------------------------------------|-----------|
| 2913 | M36803_at_GI_11321560-S        | HPX Hemopexin                            | 3306.7588 |
| 2914 | RC_AA412473_at_NA_illumina     | EST: zt95f10.s1 Soares testis NHT Homo   | 3306.776  |
| 2915 | RC_AA458934_at_GI_18087816-S   | EST: aa26g09.s1 NCI_CGAP_GCB1            | 3306.791  |
| 2916 | D45332_at_NA_illumina          | EST: Human brain cDNA, mRNA              | 3307.017  |
| 2917 | U49248_at_GI_4557480-S         | Canalicular multispecific organic anion  | 3307.0693 |
| 2918 | X77753_at_NA_illumina          | M1S1 Membrane component,                 | 3307.2834 |
| 2919 | U68019_at_NA_illumina          | Mad protein homolog (hMAD-3) mRNA        | 3307.428  |
| 2920 | AA471221_at_GI_19923528-S      | EST: PMY2200 KG1-a Lambda Zap            | 3307.6685 |
| 2921 | AA248587_at_NA_illumina        | EST: csh0559.seq.F Human fetal heart,    | 3307.789  |
| 2922 | RC_AA063460_s_at_NA_illumina   | Gastrin-releasing peptide                | 3307.9236 |
| 2923 | AA236610_at_NA_illumina        | Zr99c11.r1 NCI_CGAP_GCB1 Homo            | 3307.9722 |
| 2924 | RC_AA406629_at_NA_illumina     | GDP dissociation inhibitor 2             | 3308.0063 |
| 2925 | RC_AA189156_at_NA_illumina     | EST: zq44h01.s1 Stratagene hNT neuron    | 3308.0242 |
| 2926 | U08854_s_at_GI_4507818-S       | UDP glucuronosyltransferase precursor    | 3308.1963 |
| 2927 | D86096_cds1_s_at_GI_38505185-I | EP3-IV gene extracted from Human DNA     | 3308.2324 |
| 2928 | RC_AA465719_at_NA_illumina     | EST: aa32f07.s1 NCI_CGAP_GCB1 Homo       | 3308.686  |
| 2929 | L00190_s_at_GI_4502260-S       | ANTITHROMBIN-III PRECURSOR               | 3309.0242 |
| 2930 | U20530_at_GI_5902117-S         | Bone phosphoprotein spp-24 precursor     | 3309.2957 |
| 2931 | M17316_at_GI_13376998-S        | Gamma-A-crystallin gene (gamma-G5),      | 3309.3706 |
| 2932 | U47050_at_GI_4507686-S         | Putative calcium influx channel (htrp3)  | 3309.5884 |
| 2933 | AA092703_at_NA_illumina        | EST: ll6808.seq.F Fetal heart, Lambda    | 3309.691  |
| 2934 | R14606_at_GI_8923317-S         | EST: yf34c12.r1 Homo sapiens cDNA        | 3309.739  |
| 2935 | T83154_at_GI_32454755-S        | EST: yd41b06.r1 Homo sapiens cDNA        | 3309.812  |
| 2936 | W63699_s_at_GI_40354200-I      | Homo sapiens RCL (Rcl) mRNA, complete    | 3309.928  |
| 2937 | AA402155_s_at_GI_41406062-S    | EST: zu55e08.r1 Soares ovary tumor       | 3310.1135 |
| 2938 | Z48541_at_GI_13677215-A        | Protein tyrosine phosphatase             | 3310.1633 |
| 2939 | N34697_at_NA_illumina          | EST: yx81c11.r1 Homo sapiens cDNA        | 3310.166  |
| 2940 | L36847_at_NA_illumina          | (clone p17/90) rearranged iduronate-2-   | 3310.2268 |
| 2941 | X68242_at-2_NA_illumina        | H.sapiens mRNA for Hin-1. (from          | 3310.2427 |
| 2942 | X68242_at_NA_illumina          | PUTATIVE HIV-1 INDUCED PROTEIN           | 3310.2427 |
| 2943 | D62103_s_at_NA_illumina        | EST: Human aorta cDNA 5'-end GEN-        | 3310.3113 |
| 2944 | T52099_at_NA_illumina          | Creatine kinase, mitochondrial 2         | 3310.3118 |
| 2945 | U27655_at_NA_illumina          | RGP3 mRNA                                | 3310.3342 |
| 2946 | X91648_at_NA_illumina          | Pur alpha extended 3'untranslated region | 3310.444  |
| 2947 | M31659_at_GI_31652216-S        | GT mitochondrial solute carrier protein  | 3310.6382 |
| 2948 | RC_AA416631_at_GI_24308397-S   | EST: zu08h02.s1 Soares testis NHT Homo   | 3310.6545 |
| 2949 | X74819_at_GI_4507626-S         | TNNT2 Troponin T2 (cardiac)              | 3310.661  |
| 2950 | R20340_at_NA_illumina          | EST: yg20b09.r1 Homo sapiens cDNA        | 3310.7651 |
| 2951 | D13633_at_GI_21361644-S        | KIAA0008 gene                            | 3311.3208 |
| 2952 | W55890_at_NA_illumina          | Human Chromosome 16 BAC clone            | 3311.7915 |
| 2953 | AA480025_at_GI_40255110-S      | EST: zv18f06.r1 Soares NhHMPu S1         | 3311.8586 |
| 2954 | U67615_at_NA_illumina          | Beige protein homolog (chs) mRNA         | 3311.9036 |
| 2955 | U08049_at_NA_illumina          | Peripheral myelin protein-22 (PMP22)     | 3312.1316 |

|      |                                |                                            |           |
|------|--------------------------------|--------------------------------------------|-----------|
| 2956 | RC_AA481268_at_NA_illumina     | EST: aa35c04.s1 NCI_CGAP_GCB1              | 3312.1814 |
| 2957 | U81523_at_NA_illumina          | Endometrial bleeding associated factor     | 3312.2385 |
| 2958 | U90905_at_GI_37545842-S        | Clone 23574 mRNA sequence                  | 3312.3135 |
| 2959 | Y00318_at_GI_4504578-S         | IF I factor (complement)                   | 3312.3315 |
| 2960 | U15641_s_at_NA_illumina        | E2F4 E2F transcription factor 4, p107/p130 | 3312.459  |
| 2961 | RC_AA282886_at_GI_22749524-S   | EST: zs91g01.s1 NCI_CGAP_GCB1              | 3312.5234 |
| 2962 | U11313_at_GI_19923232-S        | SCP2 Sterol carrier protein 2              | 3312.6785 |
| 2963 | RC_AA449473_at_GI_19923880-S   | EST: zx08f08.s1 Soares total fetus         | 3312.7393 |
| 2964 | U74612_at_GI_42544164-A        | Putative M phase phosphoprotein 2          | 3312.876  |
| 2965 | X87211_at_NA_illumina          | Anion exchange protein                     | 3312.9766 |
| 2966 | R36553_at_GI_39725695-S        | EST: yg35a04.r9 Homo sapiens cDNA          | 3313.1204 |
| 2967 | U08015_at_GI_27502392-A        | NF-ATc mRNA                                | 3313.2542 |
| 2968 | U10493_s_at_NA_illumina        | Mesenchyme homeo box 1                     | 3313.3215 |
| 2969 | M34677_at_NA_illumina          | FACTOR VIII INTRON 22 PROTEIN              | 3313.4265 |
| 2970 | RC_AA455181_at_GI_17978482-A   | EST: aa15g04.s1 Soares NhHMPu S1           | 3313.4324 |
| 2971 | Y12394_at_GI_34485721-S        | Karyopherin alhph 3                        | 3313.6558 |
| 2972 | AA461584_at_NA_illumina        | EST: zx51b11.r1 Soares testis NHT Homo     | 3313.7598 |
| 2973 | U33267_at_GI_24431943-S        | Glycine receptor beta subunit (GLRB)       | 3313.809  |
| 2974 | U19523_at_GI_4503948-S         | GCH1 GTP cyclohydrolase 1 (dopa-           | 3313.9402 |
| 2975 | AA082824_at_GI_31340712-S      | Zn25e04.r1 Stratagene neuroepithelium      | 3314.1633 |
| 2976 | RC_AA232556_at_NA_illumina     | EST: zr24f03.s1 Stratagene NT2 neuronal    | 3314.3022 |
| 2977 | RC_AA017453_at_NA_illumina     | EST: ze38c12.s1 Soares retina N2b4HR       | 3314.392  |
| 2978 | RC_AA256672_at_NA_illumina     | EST: zr82h04.s1 Soares NhHMPu S1           | 3314.4436 |
| 2979 | L02840_at_GI_27436972-S        | Potassium channel Kv2.1 mRNA               | 3314.4917 |
| 2980 | U27333_at_GI_4503814-S         | Alpha-1,3 fucosyltransferase 6 (FCT3A)     | 3314.5205 |
| 2981 | M33987_at_GI_4502516-S         | CA1 Carbonic anhydrase I                   | 3314.6328 |
| 2982 | Z16411_s_at_GI_11386138-S      | 1-PHOSPHATIDYLINOSITOL-4,5-                | 3314.856  |
| 2983 | HG2850-HT4814_s_at_NA_illumina | Biliary Glycoprotein, Alt. Splice 5, A     | 3314.875  |
| 2984 | RC_AA161357_at_GI_30581133-S   | EST: zq39a10.s1 Stratagene hNT neuron      | 3314.988  |
| 2985 | RC_AA019031_at_NA_illumina     | EST: ze59h03.s1 Soares retina N2b4HR       | 3315.019  |
| 2986 | X83490_s_at_NA_illumina        | Fas/Apo-1 (clone pCRTM11-Fasdelta(3,4))    | 3315.0842 |
| 2987 | RC_AA253207_at_NA_illumina     | EST: zr52h11.s1 Soares NhHMPu S1           | 3315.393  |
| 2988 | RC_AA456093_at_NA_illumina     | EST: aa17d05.s1 Soares NhHMPu S1           | 3315.4148 |
| 2989 | RC_AA236940_at_NA_illumina     | EST: zs01d07.s1 NCI_CGAP_GCB1              | 3315.4858 |
| 2990 | AA037206_at_GI_39753958-S      | EST: zc51f11.r1 Soares senescent           | 3315.6562 |
| 2991 | AA262870_at_NA_illumina        | EST: zs25d10.r1 NCI_CGAP_GCB1 Homo         | 3316.5715 |
| 2992 | RC_AA446591_at_GI_24308240-S   | EST: zw84e06.s1 Soares total fetus         | 3316.7148 |
| 2993 | H43165_at_NA_illumina          | EST: yo02d02.r1 Homo sapiens cDNA          | 3316.7256 |
| 2994 | AA242923_at_NA_illumina        | EST: zr64g07.r1 Soares NhHMPu S1           | 3316.7676 |
| 2995 | HG651-HT5209_s_at_NA_illumina  | Adducin, Alpha Subunit, Alt. Splice 3      | 3316.8071 |
| 2996 | RC_AA011654_at_GI_37540634-S   | EST: zi03c05.s1 Soares fetal liver spleen  | 3316.878  |
| 2997 | X85106_at_GI_34147505-S        | Ribosomal S6 kinase                        | 3316.9434 |
| 2998 | W19201_at_NA_illumina          | Neuropilin 2                               | 3317.0015 |

|      |                                |                                          |           |
|------|--------------------------------|------------------------------------------|-----------|
| 2999 | W39756_at_NA_illumina          | Homo sapiens mRNA for KIAA0854           | 3317.148  |
| 3000 | X05309_at_NA_illumina          | CR1 Complement component (3b/4b)         | 3317.2808 |
| 3001 | D50532_at_NA_illumina          | Macrophage lectin 2                      | 3317.5366 |
| 3002 | RC_AA142919_at_NA_illumina     | EST: zl49a01.s1 Soares pregnant uterus   | 3317.5598 |
| 3003 | T30187_at_NA_illumina          | Homo sapiens HRIHFB2060 mRNA,            | 3317.6406 |
| 3004 | RC_AA012953_at_NA_illumina     | EST: ze35e03.s1 Soares retina N2b4HR     | 3317.658  |
| 3005 | L78833_cds1_at_GI_6552306-A    | BRCA1 gene extracted from Human          | 3317.7102 |
| 3006 | Z79581_at_NA_illumina          | LAZ3/BCL6 gene, first non coding exon    | 3317.8826 |
| 3007 | D82775_at_GI_16950602-S        | EST: similar to none, mRNA sequence.     | 3317.9248 |
| 3008 | AF006265_at_GI_37694064-A      | Estrogen receptor-binding fragment-      | 3318.0503 |
| 3009 | X91196_s_at_NA_illumina        | E14 and A-T proteins                     | 3318.0889 |
| 3010 | RC_AA165400_at_NA_illumina     | EST: zo80h10.s1 Stratagene ovarian       | 3318.0977 |
| 3011 | U26032_at_NA_illumina          | Translation initiation factor eIF-2alpha | 3318.1516 |
| 3012 | L38487_at_GI_18860919-S        | Estrogen receptor-related protein        | 3318.182  |
| 3013 | HG2981-HT3125_s_at_NA_illumina | Epican, Alt. Splice 1                    | 3318.2024 |
| 3014 | HG4683-HT5108_s_at_NA_illumina | Tumor Necrosis Factor Receptor 2         | 3318.256  |
| 3015 | RC_AA521262_at_GI_38348243-S   | EST: aa75e08.s1 NCI_CGAP_GCB1            | 3318.4368 |
| 3016 | RC_AA609672_at_GI_4503428-S    | Dual-specificity tyrosine-(Y)-           | 3318.4978 |
| 3017 | HG3893-HT4163_at_NA_illumina   | Phosphoglucomutase 1, Alt. Splice        | 3318.6355 |
| 3018 | N35467_at_NA_illumina          | Aspartylglucosaminidase                  | 3318.6968 |
| 3019 | AFFX-HUMGAPDH/M33197_M_st-     | Glyceraldehyde-3-phosphate               | 3318.757  |
| 3020 | AFFX-                          | AFFX-HUMGAPDH/M33197_M_st                | 3318.757  |
| 3021 | AA115605_at_GI_31377542-S      | HEAT SHOCK 70 KD PROTEIN 1               | 3318.8645 |
| 3022 | RC_AA490603_at_NA_illumina     | EST: aa47f09.s1 NCI_CGAP_GCB1 Homo       | 3319.0833 |
| 3023 | IL12_P40_at_NA_illumina        | No info for gene                         | 3319.0967 |
| 3024 | Z68193_at_NA_illumina          | RED-SENSITIVE OPSIN                      | 3319.0977 |
| 3025 | RC_AA255473_at_GI_44921614-S   | EST: zr83b12.s1 Soares NhHMPu S1         | 3319.1604 |
| 3026 | D17532_at_GI_21536329-S        | PROBABLE ATP-DEPENDENT RNA               | 3319.3184 |
| 3027 | U56402_s_at_GI_20149523-S      | Chromatin structural protein homolog     | 3319.3801 |
| 3028 | L40380_at_GI_10863904-S        | Thyroid receptor interactor (TRIP11)     | 3319.3967 |
| 3029 | AA092215_at_GI_31543382-S      | EST: ll4760.seq.F Fetal heart, Lambda    | 3319.4253 |
| 3030 | AA478207_at_GI_24308162-S      | EST: zu40e10.r1 Soares ovary tumor       | 3319.4292 |
| 3031 | U57092_at_GI_34147670-S        | Small GTP-binding protein rab30          | 3319.4548 |
| 3032 | U73960_at_GI_5031602-S         | ADP-ribosylation factor-like protein 4   | 3319.556  |
| 3033 | M67468_s_at_NA_illumina        | FMR1 Fragile X mental retardation 1      | 3319.6868 |
| 3034 | AF001359_f_at_GI_28559089-S    | DNA mismatch repair protein (hMLH1)      | 3319.8088 |
| 3035 | RC_AA402849_at_GI_32698875-S   | EST: zu54a01.s1 Soares ovary tumor       | 3319.9307 |
| 3036 | AA328684_at_GI_39777592-S      | EST: EST32211 Embryo, 12 week I Homo     | 3319.999  |
| 3037 | HG2314-HT2410_at_NA_illumina   | 4-Beta-Galactosyltransferase             | 3320.0754 |
| 3038 | U64197_at_GI_4759075-S         | CC chemokine LARC precursor              | 3320.2366 |
| 3039 | U11878_at_NA_illumina          | Interleukin-8 receptor type B (IL8RB)    | 3320.2695 |
| 3040 | X07695_at_GI_17318573-S        | KRT4 Keratin 4                           | 3320.2878 |
| 3041 | RC_AA489040_at_NA_illumina     | Aldolase B, fructose-bisphosphate        | 3320.3425 |

|      |                              |                                             |           |
|------|------------------------------|---------------------------------------------|-----------|
| 3042 | R77527_at_GI_40538771-S      | EST: yi76b03.r1 Homo sapiens cDNA           | 3320.3984 |
| 3043 | J03019_s_at_GI_4557264-S     | Adrenergic, beta-1-, receptor               | 3320.4426 |
| 3044 | AA477676_at_NA_illumina      | EST: zu41e12.r1 Soares ovary tumor          | 3321.017  |
| 3045 | AA393505_at_GI_33187364-S    | EST: zt73h01.r1 Soares testis NHT Homo      | 3321.0205 |
| 3046 | W72783_at_GI_8922866-S       | EST: zd57b12.r1 Soares fetal heart          | 3321.307  |
| 3047 | Z68204_at_GI_11321580-S      | Succinyl CoA synthetase                     | 3321.3625 |
| 3048 | U03858_at_GI_38455415-S      | FLT3LG Fms-related tyrosine kinase 3        | 3321.4243 |
| 3049 | RC_AA012994_at_NA_illumina   | EST: ze27e12.s1 Soares retina N2b4HR        | 3321.4402 |
| 3050 | U02019_at_NA_illumina        | Heterogeneous nuclear ribonucleoprotein     | 3321.671  |
| 3051 | W27857_at_NA_illumina        | EST: 39e2 Human retina cDNA randomly        | 3321.7673 |
| 3052 | AA242957_at_GI_42658913-S    | EST: zr65e09.r1 Soares NhHMPu S1            | 3321.7754 |
| 3053 | X52005_at_NA_illumina        | MYL4 Myosin, light polypeptide 4, alkali;   | 3321.835  |
| 3054 | RC_AA236927_at_GI_34303960-S | EST: zr99h02.s1 NCI_CGAP_GCB1 Homo          | 3321.8613 |
| 3055 | H43996_at_NA_illumina        | EST: yo70h10.r1 Homo sapiens cDNA           | 3321.8674 |
| 3056 | J00123_at_GI_40254835-S      | PROENKEPHALIN A PRECURSOR                   | 3322.0376 |
| 3057 | RC_AA172372_at_GI_8922497-S  | Homo sapiens mRNA for PBK1 protein          | 3322.187  |
| 3058 | AA228148_s_at_GI_13994260-S  | EST: zr58d07.r1 Soares NhHMPu S1            | 3322.4263 |
| 3059 | W28498_at_NA_illumina        | EST: 50e2 Human retina cDNA randomly        | 3322.4463 |
| 3060 | W01524_at_NA_illumina        | Za34f05.r1 Soares fetal liver spleen        | 3322.4565 |
| 3061 | D84454_at_GI_5032210-S       | UDP-galactose translocator                  | 3322.4946 |
| 3062 | HG4460-HT4729_at_NA_illumina | Immunoglobulin Heavy Chain, Vdj             | 3322.6982 |
| 3063 | U17989_at_GI_32454743-S      | Nuclear autoantigen GS2NA mRNA              | 3322.7085 |
| 3064 | S57296_at_NA_illumina        | HER2/neu receptor {3' region, alternatively | 3322.8613 |
| 3065 | AA075989_at_GI_29837656-S    | EST: zm75h04.r1 Stratagene                  | 3322.874  |
| 3066 | RC_AA598571_at_NA_illumina   | EST: ae35e03.s1 Gessler Wilms tumor         | 3322.9268 |
| 3067 | X65784_s_at_GI_40806172-I    | Cellular adhesion regulatory molecule       | 3322.9827 |
| 3068 | M32598_at_GI_5032008-S       | RPS11 Ribosomal protein S11                 | 3323.1548 |
| 3069 | RC_AA280896_at_NA_illumina   | EST: zs97f03.s1 NCI_CGAP_GCB1 Homo          | 3323.2092 |
| 3070 | RC_AA343513_at_NA_illumina   | EST: EST49295 Gall bladder I Homo           | 3323.322  |
| 3071 | W44317_at_NA_illumina        | EST: zc27a04.r1 Soares senescent            | 3323.368  |
| 3072 | U26403_at_GI_4503486-S       | EPLG7 Eph-related receptor tyrosine         | 3323.3918 |
| 3073 | X05345_at_GI_18201902-S      | HARS Histidyl-tRNA synthetase               | 3323.6072 |
| 3074 | M62303_at_GI_14916495-A      | Retinoic acid receptor-beta associated      | 3323.7075 |
| 3075 | C15401_at_NA_illumina        | Human fetal brain cDNA 5'-end GEN-          | 3324.071  |
| 3076 | X07173_at_GI_4504782-S       | INTER-ALPHA-TRYPSIN INHIBITOR               | 3324.177  |
| 3077 | D85418_at_GI_24430185-S      | Phosphatidylinositol-glycan-class C (PIG-   | 3324.1797 |
| 3078 | X13916_at_GI_4758685-S       | LDL-receptor related protein                | 3324.2576 |
| 3079 | RC_AA450116_at_NA_illumina   | EST: zx42e06.s1 Soares total fetus          | 3324.2654 |
| 3080 | U57911_at_NA_illumina        | Fetal brain (239FB) mRNA, from the          | 3324.3088 |
| 3081 | U87223_at_GI_4505462-S       | Contactin associated protein (Caspr)        | 3324.5706 |
| 3082 | RC_AA432083_at_NA_illumina   | EST: zw89c10.s1 Soares total fetus          | 3324.7603 |
| 3083 | Y13618_at_GI_11641426-S      | DFFRY protein, abundant transcript          | 3324.7642 |
| 3084 | AA019359_at_GI_37059776-S    | KIAA0331 gene product                       | 3324.7642 |



|      |                              |                                              |           |
|------|------------------------------|----------------------------------------------|-----------|
| 3085 | AA262458_at_GI_7657006-S     | EST: zs16h04.r1 NCI_CGAP_GCB1 Homo           | 3324.8745 |
| 3086 | M37075_at_NA_illumina        | MYL4 Myosin, light polypeptide 4, alkali;    | 3324.9219 |
| 3087 | R88038_at_NA_illumina        | Acyl-Coenzyme A dehydrogenase, very          | 3325.038  |
| 3088 | RC_AA190993_at_GI_11496999-A | A disintegrin and metalloproteinase          | 3325.28   |
| 3089 | RC_AA150274_at_NA_illumina   | EST: zl07f07.s1 Soares pregnant uterus       | 3325.2996 |
| 3090 | L07590_at_GI_32967585-A      | PPP2R3 Protein phosphatase 2 (formerly       | 3325.4573 |
| 3091 | X82153_at_GI_23110958-S      | CATHEPSIN K PRECURSOR                        | 3325.8008 |
| 3092 | M63488_at_GI_20070171-S      | RPA1 Replication protein A1 (70kD)           | 3325.9294 |
| 3093 | AA484944_at_NA_illumina      | EST: aa41b03.r1 NCI_CGAP_GCB1                | 3326.1956 |
| 3094 | D50919_at_GI_15208664-A      | KIAA0129 gene                                | 3326.2944 |
| 3095 | RC_AA461331_at_NA_illumina   | EST: zx65d10.s1 Soares total fetus           | 3326.307  |
| 3096 | AA090617_at_GI_8923008-S     | EST: y1023.seq.F Fetal heart, Lambda         | 3326.3557 |
| 3097 | HG3432-HT3621_at_NA_illumina | Fibroblast Growth Factor Receptor K-Sam,     | 3326.39   |
| 3098 | RC_AA599472_at_NA_illumina   | Eukaryotic translation elongation factor 1   | 3326.506  |
| 3099 | AA248085_at_GI_14141158-A    | Homo sapiens clone 23930 mRNA                | 3326.612  |
| 3100 | Z42840_at_GI_32698691-S      | H. sapiens partial cDNA sequence; clone c-   | 3326.682  |
| 3101 | W96311_at_GI_7549792-A       | EST: ze10g01.r1 Soares fetal heart           | 3326.9639 |
| 3102 | RC_AA028016_at_NA_illumina   | EST: zk06g04.s1 Soares pregnant uterus       | 3327.4138 |
| 3103 | U63332_at_NA_illumina        | Super cysteine rich protein mRNA, partial    | 3327.597  |
| 3104 | U63332_at-2_NA_illumina      | Human super cysteine rich protein mRNA,      | 3327.597  |
| 3105 | AA203296_at_GI_16262451-S    | EST: zx58g04.r1 Soares fetal liver spleen    | 3327.7368 |
| 3106 | M58597_at_GI_4503810-S       | FUT4 Fucosyltransferase 4 (alpha (1,3)       | 3327.914  |
| 3107 | AA253232_at_GI_22296883-S    | EST: zr53e12.r1 Soares NhHMPu S1             | 3327.9385 |
| 3108 | AA490648_at_NA_illumina      | Aa01g06.r1 Soares NhHMPu S1 Homo             | 3327.9487 |
| 3109 | L01406_at_GI_4503996-S       | GHRHR Growth hormone-releasing               | 3327.982  |
| 3110 | RC_AA233168_at_NA_illumina   | EST: zr69e03.s1 Soares NhHMPu S1             | 3328.09   |
| 3111 | RC_AA406602_at_NA_illumina   | EST: zv15a12.s1 Soares NhHMPu S1             | 3328.1362 |
| 3112 | H06460_at_GI_34147664-S      | Homo sapiens regulator of G protein          | 3328.1711 |
| 3113 | X02612_at_GI_13325053-S      | CYP1A1 Cytochrome P450, subfamily I          | 3328.1826 |
| 3114 | R70080_at_NA_illumina        | EST: yi48f02.r1 Homo sapiens cDNA clone      | 3328.2766 |
| 3115 | X85134_rna1_at_GI_4826969-S  | RBQ-3 mRNA                                   | 3328.316  |
| 3116 | L44439_at_NA_illumina        | CGG triplet repeat binding protein 1         | 3328.4846 |
| 3117 | R66772_at_GI_8922788-S       | EST: yi33h04.r1 Homo sapiens cDNA            | 3328.5242 |
| 3118 | U07231_at_GI_4504160-S       | GRSF1 G-rich RNA sequence binding            | 3328.628  |
| 3119 | RC_AA350579_at_NA_illumina   | EST: EST57939 Infant brain Homo              | 3328.725  |
| 3120 | HG4194-HT4464_at_NA_illumina | Sodium/Hydrogen Exchanger 5                  | 3328.7532 |
| 3121 | U97018_at_GI_4758267-S       | Echinoderm microtubule-associated            | 3328.8455 |
| 3122 | U79262_at_NA_illumina        | DHPS Deoxyhypusine synthase                  | 3329.0305 |
| 3123 | X74301_s_at_NA_illumina      | MHC CLASS II TRANSACTIVATOR CIITA            | 3329.0874 |
| 3124 | J03634_at_NA_illumina        | INHBA Inhibin, beta A (activin A, activin AB | 3329.2205 |
| 3125 | X85750_at_GI_6912507-S       | Transcript associated with monocyte to       | 3329.2212 |
| 3126 | W02027_s_at_NA_illumina      | EST: za57c08.r1 Soares fetal liver spleen    | 3329.2244 |
| 3127 | RC_AA019300_at_NA_illumina   | EST: ze59a12.s1 Soares retina N2b4HR         | 3329.3328 |

|      |                              |                                                               |           |
|------|------------------------------|---------------------------------------------------------------|-----------|
| 3128 | L06633_at_GI_8670550-S       | Transcription factor mRNA                                     | 3329.3914 |
| 3129 | M24122_s_at_GI_4557776-S     | MYL3 Myosin, light polypeptide 3, alkali;                     | 3329.4233 |
| 3130 | RC_AA398368_at_NA_illumina   | EST: zt60g04.s1 Soares testis NHT Homo                        | 3329.4949 |
| 3131 | Y09022_at_GI_39725713-S      | Not56-like protein                                            | 3329.601  |
| 3132 | X65550_at_GI_19923216-S      | MKI67 Antigen identified by monoclonal                        | 3329.6638 |
| 3133 | U50527_s_at_GI_16418033-S    | BRCA2 region, mRNA sequence CG018                             | 3329.7522 |
| 3134 | D82418_at_NA_illumina        | EST: similar to none, mRNA sequence.                          | 3329.937  |
| 3135 | RC_AA460239_at_NA_illumina   | EST: zx67b09.s1 Soares total fetus                            | 3330.409  |
| 3136 | U79725_at_GI_5031560-S       | A33 antigen precursor mRNA                                    | 3330.417  |
| 3137 | RC_AA463880_at_GI_13123773-S | EST: zx97f08.s1 Soares NhHMPu S1                              | 3330.4219 |
| 3138 | D49357_at_GI_4557736-S       | S-ADENOSYLMETHIONINE                                          | 3330.644  |
| 3139 | AA430953_at_NA_illumina      | Homo sapiens mRNA for actin-related                           | 3330.6465 |
| 3140 | T77971_at_GI_31559782-S      | EST: yc97c08.r1 Homo sapiens cDNA                             | 3330.7761 |
| 3141 | U67122_s_at_NA_illumina      | Ubiquitin-homology domain protein PIC1                        | 3330.852  |
| 3142 | U47054_at_GI_21361166-S      | Putative mono-ADP-ribosyltransferase                          | 3330.8564 |
| 3143 | D55643_s_at_NA_illumina      | Spleen PABL (pseudautosomal boundary-                         | 3330.9475 |
| 3144 | L38961_at_GI_34303951-S      | ITM1 Integral transmembrane protein 1                         | 3330.957  |
| 3145 | L38961_at-2_NA_illumina      | Integral membrane protein 1                                   | 3330.957  |
| 3146 | U83598_s_at_NA_illumina      | Death domain receptor 3 soluble form                          | 3331.0603 |
| 3147 | AA058439_at_NA_illumina      | EST: zk81h02.r1 Soares pregnant uterus                        | 3331.137  |
| 3148 | RC_AA406304_at_NA_illumina   | EST: zv24c04.s1 Soares NhHMPu S1                              | 3331.207  |
| 3149 | U26727_at_GI_17738295-A      | CDKN2A Cyclin-dependent kinase inhibitor                      | 3331.2095 |
| 3150 | U61374_at_GI_21314639-S      | Sushi-repeat-containing protein precursor                     | 3331.2456 |
| 3151 | U00944_at_NA_illumina        | Clone A9A2BRB6 (CAC) <sub>n</sub> /(GTG) <sub>n</sub> repeat- | 3331.4355 |
| 3152 | D42084_at_GI_24308008-S      | KIAA0094 gene, partial cds                                    | 3331.9905 |
| 3153 | Y09321_at_GI_37545625-S      | TAFII105 mRNA, partial                                        | 3332.0122 |
| 3154 | AA027765_at_NA_illumina      | EST: HPLA_CCLEE_65h7r HPLA CCLee                              | 3332.0508 |
| 3155 | D86331_s_at_GI_45594662-S    | MMP2 Matrix metalloproteinase 2                               | 3332.151  |
| 3156 | RC_AA018876_at_NA_illumina   | EST: ze58g07.s1 Soares retina N2b4HR                          | 3332.2114 |
| 3157 | U94703_at_GI_6005837-S       | Homo sapiens mitochondrial DNA                                | 3332.3105 |
| 3158 | D90070_s_at_GI_10863922-S    | LRP1 ATL-derived PMA-responsive (APR)                         | 3332.4277 |
| 3159 | RC_AA292228_at_NA_illumina   | STAT induced STAT inhibitor 3                                 | 3332.4778 |
| 3160 | L11239_at_NA_illumina        | Homeobox protein (HOX) gene, 3' end                           | 3332.5122 |
| 3161 | U41766_s_at_GI_4501914-S     | Metalloprotease/disintegrin/cysteine-rich                     | 3332.705  |
| 3162 | L17330_at_NA_illumina        | Pre-T/NK cell associated protein (6H9A)                       | 3332.7083 |
| 3163 | AA088744_at_NA_illumina      | EST: zl89e09.r1 Stratagene colon                              | 3332.7134 |
| 3164 | W28442_at_NA_illumina        | EST: 47a10 Human retina cDNA randomly                         | 3332.779  |
| 3165 | J02758_s_at_GI_5174773-S     | APOLIPOPROTEIN A-IV PRECURSOR                                 | 3332.783  |
| 3166 | RC_AA001635_at_NA_illumina   | EST: zh85f11.s1 Soares fetal liver spleen                     | 3332.8608 |
| 3167 | X79204_at_NA_illumina        | SCA1 Ataxin 1                                                 | 3333.3022 |
| 3168 | Z30425_at-2_NA_illumina      | Orphan nuclear hormone receptor                               | 3333.315  |
| 3169 | Z30425_at_GI_32189358-S      | Orphan nuclear hormone receptor                               | 3333.315  |
| 3170 | Y10205_at_NA_illumina        | CD88 protein                                                  | 3333.3425 |

|      |                                |                                            |           |
|------|--------------------------------|--------------------------------------------|-----------|
| 3171 | HG2538-HT2634_at_NA_illumina   | Heterogeneous Nuclear Ribonucleoprotein    | 3333.4944 |
| 3172 | U43885_at_GI_4503850-S         | Grb2-associated binder-1 mRNA              | 3333.53   |
| 3173 | RC_AA041276_at_NA_illumina     | 3-phosphoinositide dependent protein       | 3333.6125 |
| 3174 | Z11518_s_at_NA_illumina        | HISTIDYL-TRNA SYNTHETASE                   | 3333.62   |
| 3175 | L16896_at_GI_4885418-S         | Zinc finger protein mRNA                   | 3333.629  |
| 3176 | D87120_at_GI_7661713-S         | Cancellous bone osteoblast mRNA for        | 3333.6528 |
| 3177 | AA447052_at_GI_40789088-S      | EST: zw86b06.r1 Soares total fetus         | 3333.6826 |
| 3178 | AA313675_at_NA_illumina        | EST: EST185764 Colon carcinoma (HCC)       | 3333.7017 |
| 3179 | U40223_at_GI_28872746-S        | Uridine nucleotide receptor (UNR) gene     | 3333.9167 |
| 3180 | RC_AA424524_at_GI_37542906-S   | Homo sapiens mRNA for KIAA0286 gene,       | 3334.111  |
| 3181 | M81830_at_GI_44890054-S        | Somatostatin receptor isoform 2 (SSTR2)    | 3334.3723 |
| 3182 | L35475_at_GI_3422273-S         | Olfactory receptor-like gene               | 3334.3953 |
| 3183 | U92971_at-2_NA_illumina        | Coagulation factor II (thrombin) receptor- | 3334.5115 |
| 3184 | U92971_at_GI_34577053-S        | Protease-activated receptor 3 (PAR3)       | 3334.5115 |
| 3185 | Z29331_at_GI_33356153-A        | UBE2H Ubiquitin-conjugating enzyme E2H     | 3334.5627 |
| 3186 | D31763_at_GI_28274681-S        | KIAA0065 gene, partial cds                 | 3334.5688 |
| 3187 | W07592_s_at_NA_illumina        | EST: zb02a12.r1 Soares fetal lung          | 3334.657  |
| 3188 | X15393_rna1_at_GI_4557033-S    | Motilin gene exon 2 (and joined CDS)       | 3334.69   |
| 3189 | M74093_at_GI_17318560-A        | G1/S-SPECIFIC CYCLIN E                     | 3334.8367 |
| 3190 | X97795_at_GI_19924136-S        | mRNA homologous to S. cerevisiae           | 3334.8796 |
| 3191 | X90999_at_GI_38327035-S        | Glyoxalase II                              | 3334.8928 |
| 3192 | HG2379-HT3997_s_at_NA_illumina | Serine Hydroxymethyltransferase,           | 3334.9878 |
| 3193 | D90042_at_GI_4557782-S         | AAC2 Arylamine N-acetyltransferase, liver  | 3335.3655 |
| 3194 | L19872_at_GI_5016091-S         | AHR AH-receptor                            | 3335.4714 |
| 3195 | H87911_at_NA_illumina          | EST: yw16g06.r1 Homo sapiens cDNA          | 3335.5408 |
| 3196 | U29725_at_GI_20986498-A        | BMK1 alpha kinase mRNA                     | 3335.651  |
| 3197 | W47063_at_GI_24497621-S        | EST: zc43a08.r1 Soares senescent           | 3335.7778 |
| 3198 | U22314_s_at_GI_15890082-S      | Neural-restrictive silencer factor, splice | 3335.7996 |
| 3199 | RC_AA134747_at_GI_32490558-S   | EST: zl20g12.s1 Soares pregnant uterus     | 3335.9175 |
| 3200 | RC_D20726_at_NA_illumina       | EST: Human HL60 3'directed MboI cDNA,      | 3335.9495 |
| 3201 | M61906_at_GI_32455251-A        | PHOSPHATIDYLINOSITOL 3-KINASE              | 3335.9976 |
| 3202 | D82374_at_GI_17402870-A        | EST: similar to none, mRNA sequence.       | 3336.0896 |
| 3203 | X81892_at_GI_5031732-S         | HE6 Tm7 receptor                           | 3336.2024 |
| 3204 | U68723_at-2_NA_illumina        | Checkpoint suppressor 1                    | 3336.3088 |
| 3205 | U68723_at_GI_4885136-S         | NADH:ubiquinone oxidoreductase subunit     | 3336.3088 |
| 3206 | U51432_at_GI_18860912-S        | Nuclear protein Skip mRNA                  | 3336.39   |
| 3207 | RC_AA424343_at_NA_illumina     | EST: zv82c10.s1 Soares total fetus         | 3336.6174 |
| 3208 | RC_AA164633_at_GI_7656966-S    | EST: zo93d04.s1 Stratagene ovarian         | 3336.7607 |
| 3209 | RC_AA621762_at_GI_32306540-S   | EST: af06d05.s1 Soares testis NHT Homo     | 3336.9124 |
| 3210 | AA247475_at_GI_11037060-A      | EST: csg2940.seq.F Human fetal heart,      | 3336.9287 |
| 3211 | AA476967_at_GI_17978486-S      | EST: zu31b06.r1 Soares ovary tumor         | 3337.0225 |
| 3212 | RC_AA394071_at_GI_18104994-A   | Gamma2-adaptin                             | 3337.3896 |
| 3213 | U91316_at_NA_illumina          | Acyl-CoA thioester hydrolase mRNA          | 3337.456  |

|      |                               |                                            |           |
|------|-------------------------------|--------------------------------------------|-----------|
| 3214 | RC_AA027168_at_GI_7662403-S   | EST: ze93f10.s1 Soares fetal heart         | 3337.5515 |
| 3215 | U25128_at_GI_39995097-S       | PTH2 parathyroid hormone receptor          | 3337.6443 |
| 3216 | RC_AA417372_s_at_NA_illumina  | Dipeptidyl carboxypeptidase 1 (angiotensin | 3337.8977 |
| 3217 | X53800_s_at_GI_4504156-S      | GRO3 GRO3 oncogene                         | 3338.0386 |
| 3218 | AA495845_at_NA_illumina       | Golgi autoantigen, golgin subfamily a, 2   | 3338.087  |
| 3219 | RC_D12031_at_NA_illumina      | EST: Human HepG2 3'-directed Mbol          | 3338.146  |
| 3220 | J03626_ma1_s_at_GI_4507834-S  | UMPS gene extracted from Human UMP         | 3338.2747 |
| 3221 | RC_AA278853_at_GI_6912299-A   | EST: zs77g09.s1 NCI_CGAP_GCB1              | 3338.2854 |
| 3222 | D87742_at_NA_illumina         | KIAA0268 gene, partial cds                 | 3339.1143 |
| 3223 | RC_AA115559_at_GI_21361481-S  | EST: zi07b12.s1 Soares pregnant uterus     | 3339.1152 |
| 3224 | U95090_at_GI_10864042-S       | Chromosome 19 cosmid F19541                | 3339.219  |
| 3225 | U95090_at-2_NA_illumina       | Homo sapiens chromosome 19 cosmid          | 3339.219  |
| 3226 | W86073_at_GI_37556106-S       | EST: zd91c09.r1 Soares fetal heart         | 3339.2349 |
| 3227 | X56199_at-2_NA_illumina       | Orphan nuclear hormone receptor            | 3339.2805 |
| 3228 | X56199_at_NA_illumina         | XIST, coding sequence "a" mRNA (locus      | 3339.2805 |
| 3229 | RC_AA227934_at_NA_illumina    | EST: zr57e08.s1 Soares NhHMPu S1           | 3339.5652 |
| 3230 | U09210_at_GI_4506990-S        | SLC18A3 Solute carrier family 18           | 3339.7864 |
| 3231 | Y10615_at_NA_illumina         | CYRN2 gene                                 | 3339.8462 |
| 3232 | X98311_at_GI_5901929-S        | Carcinoembryonic antigen family member     | 3339.922  |
| 3233 | M35416_at_GI_4506404-S        | RALB V-ral simian leukemia viral           | 3339.9355 |
| 3234 | RC_AA159953_at_NA_illumina    | EST: zo75a09.s1 Stratagene pancreas        | 3339.971  |
| 3235 | HG721-HT4828_s_at_NA_illumina | Placental Protein 14, Endometrial Alpha 2  | 3340.2288 |
| 3236 | U52426_at_GI_21070996-S       | GOK (STIM1) mRNA                           | 3340.282  |
| 3237 | RC_AA282808_at_GI_13128861-S  | Histone deacetylase 3                      | 3340.322  |
| 3238 | RC_AA009764_at_NA_illumina    | EST: zi04b04.s1 Soares fetal liver spleen  | 3340.3806 |
| 3239 | HG4272-HT4542_at_NA_illumina  | Hepatocyte Growth Factor Receptor          | 3340.5527 |
| 3240 | H55741_at_NA_illumina         | EST: 121G4T7 Homo sapiens cDNA. (from      | 3340.6387 |
| 3241 | U88063_at_GI_6598317-A        | Agouti (mouse) related protein             | 3340.7402 |
| 3242 | RC_AA454719_at_GI_13899248-S  | EST: zx77b02.s1 Soares ovary tumor         | 3340.8452 |
| 3243 | RC_AA412681_at_NA_illumina    | EST: zu12d02.s1 Soares testis NHT Homo     | 3340.9006 |
| 3244 | RC_AA450373_at_NA_illumina    | EST: zx05h06.s1 Soares total fetus         | 3341.1116 |
| 3245 | D16815_at_GI_40254809-S       | EAR-1r                                     | 3341.2424 |
| 3246 | X97058_at_GI_29029609-A       | P2Y6 receptor, short splice variant mRNA   | 3341.3657 |
| 3247 | U17743_s_at_NA_illumina       | JNK activating kinase (JNKK1) mRNA         | 3341.3667 |
| 3248 | U37359_at_GI_24234689-A       | MRE11 Homolog of yeast MRE11               | 3341.3972 |
| 3249 | R51970_at_GI_18765736-S       | EST: yg84a10.r1 Homo sapiens cDNA          | 3341.4126 |
| 3250 | RC_AA258819_s_at_GI_42657118- | EST: zs32f05.s1 NCI_CGAP_GCB1 Homo         | 3341.5486 |
| 3251 | AA460116_at_NA_illumina       | Ubiquitin protein ligase E3A (human        | 3341.637  |
| 3252 | X77307_at_GI_40254430-S       | 5-HYDROXYTRYPTAMINE 2B                     | 3341.69   |
| 3253 | AA443230_at_NA_illumina       | Casein kinase 2, alpha 1 polypeptide       | 3341.8518 |
| 3254 | RC_D60354_s_at_NA_illumina    | Human mRNA for KIAA0007 gene, partial      | 3341.9932 |
| 3255 | AA247989_at_NA_illumina       | K8033.seq.F Human fetal heart, Lambda      | 3342.01   |
| 3256 | L27671_s_at_NA_illumina       | Intercellular adhesion molecule 4,         | 3342.0332 |

|      |                               |                                            |           |
|------|-------------------------------|--------------------------------------------|-----------|
| 3257 | U93868_at_NA_illumina         | Human RNA polymerase III subunit           | 3342.0422 |
| 3258 | RC_D59474_f_at_NA_illumina    | Calpastatin                                | 3342.0544 |
| 3259 | RC_AA400888_at_GI_33457315-S  | EST: zu50a11.s1 Soares ovary tumor         | 3342.0947 |
| 3260 | RC_AA281104_at_NA_illumina    | EST: zs98a07.s1 NCI_CGAP_GCB1              | 3342.1375 |
| 3261 | U23942_at_GI_13929427-S       | CYP51 Cytochrome P450, 51 (lanosterol      | 3342.1404 |
| 3262 | RC_AA243574_at_NA_illumina    | EST: zr67h10.s1 Soares NhHMPu S1           | 3343.0488 |
| 3263 | RC_AA431287_at_GI_10518498-S  | Lactate dehydrogenase B                    | 3343.2925 |
| 3264 | M74297_at_GI_24497492-S       | HOXA4 Homeo box A4                         | 3343.321  |
| 3265 | RC_AA303076_at_GI_22208961-S  | EST: EST12913 Uterus tumor I Homo          | 3343.3735 |
| 3266 | AA348359_at_GI_39725657-S     | EST: EST54824 Hippocampus II Homo          | 3343.4646 |
| 3267 | RC_AA078927_f_at_NA_illumina  | EST: zm92a08.s1 Stratagene ovarian         | 3343.6003 |
| 3268 | U84971_at_NA_illumina         | Homo sapiens fetal unknown mRNA,           | 3343.6094 |
| 3269 | W38714_at_NA_illumina         | EST: zb27d03.r1 Soares parathyroid tumor   | 3344.11   |
| 3270 | RC_D60608_at_NA_illumina      | EST: Human fetal brain cDNA 3'-end GEN-    | 3344.149  |
| 3271 | U62293_rna1_s_at_GI_8051614-A | LIMK1 gene (LIM-kinase1) extracted from    | 3344.156  |
| 3272 | Z50194_at_GI_6679302-S        | PQ-rich protein                            | 3344.2217 |
| 3273 | RC_AA465147_at_NA_illumina    | Chromosome 1 specific transcript           | 3344.2432 |
| 3274 | RC_AA235034_at_GI_21281676-S  | EST: zs36d01.s1 Soares NhHMPu S1           | 3344.2925 |
| 3275 | AA250804_at_NA_illumina       | EST: zs06a01.r1 NCI_CGAP_GCB1 Homo         | 3344.3489 |
| 3276 | X74987_s_at_GI_4506558-S      | 2-5A binding protein                       | 3344.4219 |
| 3277 | X15331_s_at_NA_illumina       | PRPS1 Phosphoribosyl pyrophosphate         | 3344.4834 |
| 3278 | W27041_at_GI_8923679-S        | EST: 19e9 Human retina cDNA randomly       | 3344.71   |
| 3279 | W28595_at_NA_illumina         | Tetratricopeptide repeat domain 2          | 3344.743  |
| 3280 | RC_AA452416_s_at_GI_21361528- | EST: zx31g07.s1 Soares total fetus         | 3345.0344 |
| 3281 | U80017_rna1_at_GI_31747573-S  | Btf2p44 gene (basic transcription factor 2 | 3345.0754 |
| 3282 | X91117_rna1_at_GI_4557045-S   | HG NET gene exon 1                         | 3345.0881 |
| 3283 | S59184_at_GI_11863158-S       | RYK RYK receptor-like tyrosine kinase      | 3345.2395 |
| 3284 | RC_AA281298_at_NA_illumina    | EST: zs94h08.s1 NCI_CGAP_GCB1              | 3345.392  |
| 3285 | U77664_at-2_NA_illumina       | Human RNaseP protein p38 (RPP38)           | 3345.3984 |
| 3286 | U77664_at_GI_5454025-A        | RNaseP protein p38 (RPP38) mRNA            | 3345.3984 |
| 3287 | T62771_s_at_GI_6857817-S      | Homo sapiens nucleoplasmin-3 (NPM3)        | 3345.4294 |
| 3288 | R75961_at_NA_illumina         | Apoptosis specific protein                 | 3345.4685 |
| 3289 | M26901_s_at_GI_11125774-S     | RENIN PRECURSOR, RENAL                     | 3345.469  |
| 3290 | X87767_at_NA_illumina         | CD89 gene, exon S1                         | 3345.641  |
| 3291 | X86098_at_NA_illumina         | BS69 protein                               | 3345.8398 |
| 3292 | U40371_at_GI_4826893-S        | 3',5' cyclic nucleotide phosphodiesterase  | 3345.9092 |
| 3293 | Y09267_at_GI_4503756-S        | Flavin-containing monooxygenase 2          | 3345.9236 |
| 3294 | RC_AA427978_at_NA_illumina    | EST: zw32f12.s1 Soares ovary tumor         | 3346.4663 |
| 3295 | N31668_at_NA_illumina         | Novel centrosomal protein RanBPM           | 3346.48   |
| 3296 | M90391_s_at_GI_27262654-A     | Putative IL-16 protein precursor, mRNA     | 3346.5447 |
| 3297 | M90391_s_at-2_NA_illumina     | Interleukin 16 (lymphocyte chemoattractant | 3346.5447 |
| 3298 | R36410_at_GI_40254840-S       | Homo sapiens alpha 1,2-mannosidase IB      | 3346.5554 |
| 3299 | AA165019_at_NA_illumina       | Protein kinase, mitogen-activated 6        | 3346.7734 |

|      |                               |                                            |           |
|------|-------------------------------|--------------------------------------------|-----------|
| 3300 | AA018418_at_GI_37546137-S     | EST: ze50a02.r1 Soares retina N2b4HR       | 3346.8835 |
| 3301 | RC_AA411014_at_NA_illumina    | EST: zv40a08.s1 Soares ovary tumor         | 3346.888  |
| 3302 | RC_D60170_at_GI_40255235-S    | EST: Human fetal brain cDNA 3'-end GEN-    | 3347.1467 |
| 3303 | U34844_at_NA_illumina         | Mercurial-insensitive water-channel gene,  | 3347.2014 |
| 3304 | RC_AA412293_at_NA_illumina    | EST: zu10g07.s1 Soares testis NHT Homo     | 3347.2585 |
| 3305 | RC_AA430474_at_NA_illumina    | EST: zw23a12.s1 Soares ovary tumor         | 3347.2773 |
| 3306 | RC_AA045775_at_NA_illumina    | EST: zk75f06.s1 Soares pregnant uterus     | 3347.5422 |
| 3307 | AA160378_at_NA_illumina       | EST: zo74b07.r1 Stratagene pancreas        | 3347.654  |
| 3308 | RC_AA251753_at_GI_37549914-S  | EST: zs11a03.s1 NCI_CGAP_GCB1              | 3347.7434 |
| 3309 | D80001_at_NA_illumina         | KIAA0179 gene, partial cds                 | 3347.8088 |
| 3310 | U18259_at_NA_illumina         | Clone CIITA-8 MHC class II transactivator  | 3348.0767 |
| 3311 | X80062_at_NA_illumina         | SA mRNA                                    | 3348.2703 |
| 3312 | X80062_at-2_NA_illumina       | Human SA mRNA for SA gene product,         | 3348.2703 |
| 3313 | M11437_cds2_at_NA_illumina    | KNG gene (kininogen) extracted from        | 3348.2712 |
| 3314 | U55054_at_GI_34147633-S       | K-Cl cotransporter (hKCC1) mRNA            | 3348.5117 |
| 3315 | RC_AA179338_at_NA_illumina    | EST: zp48e09.s1 Stratagene HeLa cell s3    | 3348.574  |
| 3316 | X69116_s_at_NA_illumina       | ZNF37A Zinc finger protein 37a (KOX 21)    | 3348.6863 |
| 3317 | AA093015_at_GI_17105398-A     | Homo sapiens mRNA for NORI-1,              | 3348.7112 |
| 3318 | U01160_at_NA_illumina         | Transmembrane 4 superfamily protein        | 3348.7642 |
| 3319 | X16354_at_GI_19923194-S       | BGP Biliary glycoprotein {alternative      | 3348.7703 |
| 3320 | RC_AA456589_at_GI_8922978-S   | EST: zx73d04.s1 Soares ovary tumor         | 3348.9036 |
| 3321 | RC_AA149987_at_GI_21396490-S  | Homo sapiens thymus specific serine        | 3349.136  |
| 3322 | AA504524_at_NA_illumina       | EST: aa60a03.r1 NCI_CGAP_GCB1              | 3349.2112 |
| 3323 | RC_AA131530_at_NA_illumina    | EST: zl33d07.s1 Soares pregnant uterus     | 3349.2446 |
| 3324 | L25798_at_GI_39930536-S       | HMGCS1 3-hydroxy-3-methylglutaryl-         | 3349.36   |
| 3325 | U16258_at_GI_34304357-S       | 40S RIBOSOMAL PROTEIN S7                   | 3349.3757 |
| 3326 | AA012885_at_NA_illumina       | EST: ze27f07.r1 Soares retina N2b4HR       | 3349.4219 |
| 3327 | RC_AA280105_s_at_GI_34147331- | Homo sapiens KIAA0409 mRNA, partial        | 3349.453  |
| 3328 | RC_AA463910_at_GI_22749336-S  | EST: aa08g08.s1 Soares NhHMPu S1           | 3349.5234 |
| 3329 | U38291_ma1_at_NA_illumina     | Microtubule-associated protein 1a          | 3349.6477 |
| 3330 | RC_AA115253_at_NA_illumina    | EST: zl07g12.s1 Soares pregnant uterus     | 3349.692  |
| 3331 | D42108_at_GI_5453911-S        | Phospholipase C                            | 3349.7395 |
| 3332 | RC_AA236786_at_GI_27479970-S  | EST: zr76d12.s1 Soares NhHMPu S1           | 3349.749  |
| 3333 | U30894_at_GI_31543619-S       | N-sulphoglucosamine sulphohydrolase        | 3349.7793 |
| 3334 | D50370_at_GI_45359866-S       | Nucleosome assembly protein                | 3349.7969 |
| 3335 | R17315_at_NA_illumina         | Yg12g11.r1 Homo sapiens cDNA clone         | 3349.931  |
| 3336 | D21163_at_NA_illumina         | KIAA0031 gene                              | 3350.021  |
| 3337 | AA044217_at_NA_illumina       | EST: zk50h07.r1 Soares pregnant uterus     | 3350.1082 |
| 3338 | RC_D25942_i_at_NA_illumina    | EST: Human colon 3'directed Mbol cDNA,     | 3350.3027 |
| 3339 | M83822_at_GI_16904380-S       | Beige-like protein (BGL) mRNA, partial cds | 3350.5261 |
| 3340 | AA043601_at_NA_illumina       | Ubiquitin-conjugating enzyme E2H           | 3350.5972 |
| 3341 | AA329917_at_GI_11024703-S     | EST: EST33590 Embryo, 12 week II Homo      | 3350.664  |
| 3342 | AB002306_at_NA_illumina       | Human mRNA for KIAA0308 gene, partial      | 3350.7856 |

|      |                              |                                               |           |
|------|------------------------------|-----------------------------------------------|-----------|
| 3343 | X56677_at_GI_23111008-S      | MYOD1 Myogenic factor 3                       | 3350.8271 |
| 3344 | AA095022_at_GI_19424131-S    | EST: cp2494.seq.F Fetal heart, Lambda         | 3351.0015 |
| 3345 | U86070_at_GI_4505904-S       | PMM1 Phosphomannomutase                       | 3351.0754 |
| 3346 | D00762_at_GI_23110938-A      | PROTEASOME COMPONENT C8                       | 3351.1184 |
| 3347 | D86640_at_GI_4507246-S       | Stac                                          | 3351.162  |
| 3348 | X59727_at_GI_6715608-S       | EXTRACELLULAR SIGNAL-REGULATED                | 3351.191  |
| 3349 | Z46376_rna1_at_GI_40806188-S | HK2 mRNA for hexokinase II                    | 3351.3254 |
| 3350 | W27503_at_NA_illumina        | Homo sapiens mRNA for KIAA0679                | 3351.3357 |
| 3351 | D11151_at_GI_4503464-S       | EDNRA Endothelin receptor type A              | 3351.3635 |
| 3352 | U24266_at_GI_25777735-A      | Pyrroline-5-carboxylate dehydrogenase         | 3351.4158 |
| 3353 | AA004231_at_NA_illumina      | EST: zh92a03.r1 Soares fetal liver spleen     | 3351.4958 |
| 3354 | RC_AA086412_at_GI_21237727-S | DEAD/H (Asp-Glu-Ala-Asp/His) box              | 3351.7603 |
| 3355 | F15197_at_NA_illumina        | EST: H. sapiens partial cDNA sequence,        | 3351.8665 |
| 3356 | AA085054_at_NA_illumina      | Zn11a09.r1 Stratagene hNT neuron              | 3351.9436 |
| 3357 | U72263_s_at_NA_illumina      | EXT2 Exostoses (multiple) 2                   | 3351.9568 |
| 3358 | RC_AA478975_at_GI_22095357-S | EST: zv18f05.s1 Soares NhHMPu S1              | 3352.0193 |
| 3359 | U21090_at_GI_5453923-S       | DNA polymerase delta small subunit            | 3352.1558 |
| 3360 | D82060_at_GI_5901935-S       | Kidney mRNA for putative membrane             | 3352.3428 |
| 3361 | U82467_at_NA_illumina        | Tub homolog (TUB) mRNA                        | 3352.3525 |
| 3362 | U19142_at_GI_4503876-S       | GAGE1 G antigen 1 (GAGE-1)                    | 3352.4019 |
| 3363 | D89377_i_at_NA_illumina      | Msh (Drosophila) homeo box homolog 2          | 3352.5334 |
| 3364 | RC_AA600147_at_NA_illumina   | EST: ae50d07.s1 Stratagene lung               | 3352.5403 |
| 3365 | S80267_s_at_GI_34147655-S    | P72syk {G insertion nucleotide 92}            | 3352.565  |
| 3366 | W92515_at_NA_illumina        | EST: ze44c12.r1 Soares retina N2b4HR          | 3352.6548 |
| 3367 | U58096_at_NA_illumina        | TSPY Testis specific protein, Y-linked        | 3352.694  |
| 3368 | RC_AA164289_at_NA_illumina   | EST: zp03a12.s1 Stratagene ovarian            | 3352.7856 |
| 3369 | RC_AA609519_at_GI_13259538-S | EST: af14e11.s1 Soares testis NHT Homo        | 3352.7861 |
| 3370 | M24069_at_GI_21359983-S      | DNA-BINDING PROTEIN A                         | 3352.791  |
| 3371 | D13814_s_at_GI_14043065-A    | AGTR1 Angiotensin receptor 1                  | 3352.9097 |
| 3372 | R71539_at_NA_illumina        | EST: yi52e02.r1 Homo sapiens cDNA             | 3353.1997 |
| 3373 | X02176_s_at_NA_illumina      | C9 Complement component C9                    | 3353.459  |
| 3374 | U19487_at_GI_31881629-S      | Prostaglandin E2 receptor mRNA                | 3353.5576 |
| 3375 | M64322_s_at_NA_illumina      | Protein tyrosine phosphatase, non-            | 3353.5576 |
| 3376 | R72318_at_NA_illumina        | Homo sapiens nucleolar autoantigen No55       | 3353.7014 |
| 3377 | M27543_at_GI_5729849-S       | GNAI1 Alternative guanine nucleotide-         | 3354.036  |
| 3378 | D00723_at_GI_31542839-S      | GCSH Glycine cleavage system protein H        | 3354.0874 |
| 3379 | M91488_at_NA_illumina        | EST: HUMRTPGEAG Homo sapiens                  | 3354.5125 |
| 3380 | X07619_s_at_NA_illumina      | Cytochrome P450 db1 variant b                 | 3354.8423 |
| 3381 | M35999_at_GI_4557676-S       | ITGB3 Integrin, beta 3 (platelet              | 3354.9822 |
| 3382 | M35999_at-2_NA_illumina      | Integrin, beta 3 (platelet glycoprotein IIIa, | 3354.9822 |
| 3383 | M16424_at_GI_13128865-S      | BETA-HEXOSAMINIDASE ALPHA CHAIN               | 3355.0522 |
| 3384 | RC_D58185_at_GI_32171218-S   | EST: Human aorta cDNA 3'-end GEN-             | 3355.2764 |
| 3385 | Y07565_s_at_GI_4506532-S     | RIN Ric (Drosophila)-like (expressed in       | 3355.4084 |

|      |                              |                                          |           |
|------|------------------------------|------------------------------------------|-----------|
| 3386 | W95804_at_NA_illumina        | JAK binding protein                      | 3355.5808 |
| 3387 | M62958_at_GI_21264335-S      | RDS Retinal degeneration slow            | 3355.6758 |
| 3388 | M15169_at_NA_illumina        | ADRB2 Adrenergic, beta-2-, receptor,     | 3355.6821 |
| 3389 | AA233191_at_GI_42660285-S    | Homo sapiens mRNA for KIAA0831           | 3355.7231 |
| 3390 | AA305729_at_GI_21361928-S    | EST: EST176726 Colon carcinoma (Caco-    | 3355.9966 |
| 3391 | RC_AA281478_at_NA_illumina   | EST: zs96f03.s1 NCI_CGAP_GCB1 Homo       | 3356.0156 |
| 3392 | AA282640_at_NA_illumina      | EST: zs90d09.r1 NCI_CGAP_GCB1 Homo       | 3356.2349 |
| 3393 | M85165_at_NA_illumina        | ELK4 ELK4, ETS-domain protein (SRF       | 3356.2422 |
| 3394 | U68536_at_GI_5902161-S       | Zinc finger protein mRNA                 | 3356.321  |
| 3395 | RC_AA252191_at_NA_illumina   | Homo sapiens PAC clone DJ130H16 from     | 3356.393  |
| 3396 | T51659_at_NA_illumina        | EST: yb27a03.r1 Homo sapiens cDNA        | 3356.482  |
| 3397 | M64673_at_GI_5031766-S       | HEAT SHOCK FACTOR PROTEIN 1              | 3356.611  |
| 3398 | L49219_f_at_NA_illumina      | Retinoblastoma susceptibility protein    | 3356.682  |
| 3399 | M76665_at_GI_32455237-A      | CORTICOSTEROID 11-BETA-                  | 3356.7502 |
| 3400 | RC_AA112479_at_NA_illumina   | EST: zn69a02.s1 Stratagene HeLa cell s3  | 3356.8806 |
| 3401 | HG3495-HT3689_at_NA_illumina | Collagen, Type Ix, Alpha 1               | 3356.9036 |
| 3402 | M59820_at_GI_27437044-A      | CSF3R Colony stimulating factor 3        | 3356.9092 |
| 3403 | RC_D19707_at_NA_illumina     | EST: Human HL60 3'directed Mbol cDNA,    | 3356.9775 |
| 3404 | AB002364_at_GI_21265036-S    | Human mRNA for KIAA0366 gene, partial    | 3356.984  |
| 3405 | X07834_at_GI_10835186-S      | SOD2 Superoxide dismutase 2,             | 3357.2034 |
| 3406 | RC_AA206421_at_GI_13376229-S | EST: zq51b04.s1 Stratagene               | 3357.36   |
| 3407 | RC_AA598412_at_GI_8922734-S  | EST: ae48b08.s1 Stratagene lung          | 3357.4116 |
| 3408 | AF000231_at_GI_34485712-S    | RAS-RELATED PROTEIN RAB-11A              | 3357.6929 |
| 3409 | W79865_at_GI_21614524-S      | Glypican 4                               | 3357.7869 |
| 3410 | U61538_at_GI_37622888-S      | Calcium-binding protein chp mRNA         | 3357.983  |
| 3411 | N42866_at_NA_illumina        | EST: yy13c05.r1 Homo sapiens cDNA        | 3358.1619 |
| 3412 | AA278286_at_NA_illumina      | M-phase phosphoprotein 1                 | 3358.162  |
| 3413 | D50645_at_GI_14141194-S      | SDF2                                     | 3358.207  |
| 3414 | RC_AA425701_at_NA_illumina   | EST: zw47d10.s1 Soares total fetus       | 3358.3816 |
| 3415 | M60298_at_GI_4557558-S       | EPB42 Erythrocyte membrane protein       | 3358.3833 |
| 3416 | U33632_at_GI_15451900-S      | Two P-domain K+ channel TWIK-1 mRNA      | 3358.4102 |
| 3417 | RC_AA599751_at_GI_23346638-S | Homo sapiens candidate tumor suppressor  | 3358.5    |
| 3418 | T94828_at_GI_34147419-S      | EST: ye38d09.r1 Homo sapiens cDNA        | 3358.5183 |
| 3419 | M55543_at_GI_38327557-S      | INTERFERON-INDUCED GUANYLATE-            | 3358.5425 |
| 3420 | W94795_at_NA_illumina        | Zinc finger protein 143 (clone pHZ-1)    | 3358.6638 |
| 3421 | RC_AA211918_at_GI_42544226-S | EST: zq85b08.s1 Stratagene hNT neuron    | 3358.68   |
| 3422 | U88898_at_NA_illumina        | Endogenous retroviral H                  | 3358.8005 |
| 3423 | D12485_at_GI_13324676-S      | Plasma cell membrane glycoprotein (PC-1) | 3358.9836 |
| 3424 | RC_AA256664_at_GI_7706090-S  | EST: zr82g12.s1 Soares NhHMPu S1         | 3358.9949 |
| 3425 | RC_AA465192_at_NA_illumina   | EST: aa33f10.s1 NCI_CGAP_GCB1 Homo       | 3359.1426 |
| 3426 | RC_D19673_at_NA_illumina     | EST: Human HL60 3'directed Mbol cDNA,    | 3359.1985 |
| 3427 | U79257_at-2_NA_illumina      | Human clone 23932 mRNA sequence          | 3359.2058 |
| 3428 | U79257_at_GI_16306499-A      | Clone 23932 mRNA sequence                | 3359.2058 |



|      |                                |                                            |           |
|------|--------------------------------|--------------------------------------------|-----------|
| 3429 | AA311076_at_NA_illumina        | EST: EST181880 Jurkat T-cells V Homo       | 3359.403  |
| 3430 | AA447230_at_GI_37549886-S      | EST: zw93a03.r1 Soares total fetus         | 3359.451  |
| 3431 | AA115397_at_GI_23199994-S      | EST: zl88b10.r1 Stratagene colon           | 3359.5989 |
| 3432 | W28953_at_NA_illumina          | EST: 54b7 Human retina cDNA randomly       | 3359.8606 |
| 3433 | U24683_at_NA_illumina          | Anti-B cell autoantibody IgM heavy chain   | 3359.8704 |
| 3434 | U08006_s_at_GI_4557388-S       | Complement 8 alpha subunit (C8A) gene      | 3359.9023 |
| 3435 | HG3162-HT3339_at_NA_illumina   | Transcription Factor lia                   | 3359.9038 |
| 3436 | AA496083_at_NA_illumina        | EST: zu67c08.r1 Soares testis NHT Homo     | 3360.0051 |
| 3437 | R33735_at_GI_34147220-S        | EST: yh82a08.r1 Homo sapiens cDNA          | 3360.0098 |
| 3438 | RC_AA007633_at_NA_illumina     | EST: zh99g07.s1 Soares fetal liver spleen  | 3360.1    |
| 3439 | AA216256_at_NA_illumina        | D10S102                                    | 3360.1133 |
| 3440 | U79241_at_NA_illumina          | Clone 23759 mRNA, partial cds              | 3360.1167 |
| 3441 | RC_AA279205_at_GI_21493046-S   | H.sapiens mRNA for A-kinase anchoring      | 3360.129  |
| 3442 | AA332089_at_NA_illumina        | EST: EST36010 Embryo, 8 week I Homo        | 3360.1296 |
| 3443 | AA448460_at_GI_13569896-S      | EST: zw79b12.r1 Soares testis NHT Homo     | 3360.1492 |
| 3444 | AA248297_at_NA_illumina        | EST: csg3022.seq.F Human fetal heart,      | 3360.1538 |
| 3445 | H93249_at_NA_illumina          | Angiotensin receptor-like 2                | 3360.3926 |
| 3446 | HG3570-HT3773_at_NA_illumina   | Protein Phosphatase Inhibitor Homolog      | 3360.4436 |
| 3447 | U69108_at_GI_22027626-A        | TNF receptor associated factor 5 mRNA,     | 3360.4724 |
| 3448 | U69108_at-2_NA_illumina        | TNF receptor-associated factor 5           | 3360.4724 |
| 3449 | M32373_at_GI_4557332-I         | ARSB Arylsulfatase B                       | 3360.5852 |
| 3450 | W28275_at_NA_illumina          | EST: 44g12 Human retina cDNA randomly      | 3360.6475 |
| 3451 | R71427_at_GI_19923332-S        | EST: yi51d01.r1 Homo sapiens cDNA          | 3360.6487 |
| 3452 | AA471252_at_GI_28872739-A      | EST: PMY2306 KG1-a Lambda Zap              | 3360.6907 |
| 3453 | AA342422_s_at_NA_illumina      | EST: EST47983 Fetal spleen Homo            | 3360.9556 |
| 3454 | T61992_at_NA_illumina          | EST: yb96h08.r1 Homo sapiens cDNA          | 3361.0618 |
| 3455 | M59941_at_GI_4559407-S         | CSF2RB Colony stimulating factor 2         | 3361.2363 |
| 3456 | X93498_at_GI_6677928-S         | 21-Glutamic Acid-Rich Protein (21-GARP)    | 3361.2803 |
| 3457 | AA043021_at_GI_13929469-S      | UDP-Gal:betaGlcNAc beta 1,4-               | 3361.3818 |
| 3458 | U46006_s_at_GI_4503100-S       | Smooth muscle LIM protein (h-SmLIM)        | 3361.4707 |
| 3459 | AA282978_at_GI_37543220-S      | EST: zt16c08.r1 NCI_CGAP_GCB1 Homo         | 3361.596  |
| 3460 | R79255_at_NA_illumina          | EST: yi84a04.r1 Homo sapiens cDNA          | 3361.614  |
| 3461 | RC_AA609547_at_NA_illumina     | Homo sapiens mRNA for KIAA0625             | 3361.6218 |
| 3462 | U21936_at_GI_4827007-S         | Peptide transporter (HPEPT1) mRNA          | 3361.6423 |
| 3463 | U49278_at_GI_40316914-S        | Putative DNA-binding protein mRNA,         | 3361.658  |
| 3464 | AA386297_at_NA_illumina        | EST: EST185039 Brain IV Homo sapiens       | 3361.8909 |
| 3465 | U04285_s_at_GI_4557720-S       | LIPA Lipase A, lysosomal acid, cholesterol | 3361.9426 |
| 3466 | C00449_s_at_NA_illumina        | EST: HUMGS0006582, Human Gene              | 3362.089  |
| 3467 | S67798_at_GI_23510417-A        | HYALURONIDASE PRECURSOR                    | 3362.1526 |
| 3468 | AA402238_at_NA_illumina        | EST: zu47a10.r1 Soares ovary tumor         | 3362.2341 |
| 3469 | HG1783-HT1803_s_at_NA_illumina | Islet Amyloid Polypeptide                  | 3362.2952 |
| 3470 | L37882_at_GI_5922012-S         | Frizzled gene product mRNA                 | 3362.3716 |
| 3471 | RC_AA253419_at_NA_illumina     | EST: zr77e01.s1 Soares NhHMPu S1           | 3362.3765 |

|      |                              |                                           |           |
|------|------------------------------|-------------------------------------------|-----------|
| 3472 | W20070_at_NA_illumina        | EST: zb40d01.r1 Soares parathyroid tumor  | 3362.391  |
| 3473 | U40215_at_GI_19924102-A      | SYN2 Synapsin IIb                         | 3362.4224 |
| 3474 | U88667_at_GI_4557875-S       | ATP binding cassette transporter (ABCR)   | 3362.4734 |
| 3475 | M93415_at_NA_illumina        | ACVR2 Activin A receptor, type II         | 3362.5283 |
| 3476 | M75110_at_GI_4557338-S       | H,K-ATPase beta subunit mRNA              | 3362.5767 |
| 3477 | W27617_at_GI_6005763-S       | EST: 35c5 Human retina cDNA randomly      | 3362.734  |
| 3478 | Z21206_at_NA_illumina        | EST: H. sapiens putatively transcribed    | 3362.764  |
| 3479 | RC_AA001928_at_GI_29029592-S | EST: zh83f05.s1 Soares fetal liver spleen | 3362.7693 |
| 3480 | U66702_at_GI_19743913-A      | Phogrin mRNA                              | 3362.9363 |
| 3481 | AA454191_at_GI_30061486-S    | EST: zx48b10.r1 Soares testis NHT Homo    | 3362.9595 |
| 3482 | D82326_at_NA_illumina        | Amino acid transport-related protein      | 3363.0896 |
| 3483 | D25278_at-2_NA_illumina      | KIAA0036 gene product                     | 3363.1018 |
| 3484 | D25278_at_GI_42734305-S      | KIAA0036 gene                             | 3363.1018 |
| 3485 | X90392_at_NA_illumina        | MUSCLE-SPECIFIC DNASE I-LIKE              | 3363.1648 |
| 3486 | U59057_at_GI_4503058-S       | CRYBA4 Beta-A4 crystallin                 | 3363.549  |
| 3487 | RC_AA521111_at_GI_14249537-S | EST: aa70h12.s1 NCI_CGAP_GCB1             | 3363.5498 |
| 3488 | M64572_at_GI_18104985-S      | PTPN3 Protein tyrosine phosphatase, non-  | 3363.6694 |
| 3489 | RC_AA157568_at_NA_illumina   | EST: zo68h02.s1 Stratagene pancreas       | 3363.7627 |
| 3490 | RC_AA598410_at_NA_illumina   | EST: ae48b06.s1 Stratagene lung           | 3363.9019 |
| 3491 | RC_AA195070_at_GI_37540386-S | EST: zr35f09.s1 Soares NhHMPu S1          | 3363.9119 |
| 3492 | RC_AA085613_at_GI_29789087-S | EST: zn64d07.s1 Stratagene HeLa cell s3   | 3364.0664 |
| 3493 | U35246_at_GI_18105062-S      | Vacuolar protein sorting homolog h-vps45  | 3364.1013 |
| 3494 | RC_AA443811_at_GI_8922803-S  | EST: zw86g10.s1 Soares total fetus        | 3364.2612 |
| 3495 | U76369_at_GI_4507048-S       | Cationic amino acid transporter-2B        | 3364.336  |
| 3496 | L23116_at_GI_4557612-S       | GALC Galactocerebrosidase                 | 3364.3696 |
| 3497 | K02054_at_GI_34222290-S      | GRP Gastrin-releasing peptide             | 3364.483  |
| 3498 | RC_AA052953_at_NA_illumina   | EST: zl70b01.s1 Stratagene colon          | 3364.7158 |
| 3499 | RC_AA076133_at_GI_34147582-S | EST: zm18h01.s1 Stratagene pancreas       | 3364.7944 |
| 3500 | U30828_at_GI_38158029-S      | Splicing factor SRp55-2 (SRp55) mRNA      | 3365.1108 |
| 3501 | U28042_at_GI_13514830-S      | DEAD box RNA helicase-like protein        | 3365.1982 |
| 3502 | M29037_s_at_NA_illumina      | 17 beta-hydroxysteroid dehydrogenase      | 3365.35   |
| 3503 | RC_AA133808_at_NA_illumina   | EST: zl32e11.s1 Soares pregnant uterus    | 3365.3564 |
| 3504 | M32886_at_GI_38679886-A      | SRI Sorcin                                | 3365.5918 |
| 3505 | L27586_at_GI_36950990-S      | ORPHAN RECEPTOR TR4                       | 3365.619  |
| 3506 | AA430979_at_NA_illumina      | Homo sapiens chromosome 19, cosmid        | 3365.6611 |
| 3507 | R34531_at_GI_18378734-S      | KIAA0480 gene product                     | 3365.7163 |
| 3508 | X16667_at-2_NA_illumina      | Homeo box B3                              | 3365.9722 |
| 3509 | X16667_at_GI_25121960-S      | HOXB3 Homeo box B3                        | 3365.9722 |
| 3510 | AB002355_s_at_NA_illumina    | Human mRNA for KIAA0357 gene, partial     | 3365.978  |
| 3511 | U14518_at_GI_4585861-S       | CENPA Centromere protein A (17kD)         | 3366.04   |
| 3512 | AA174173_at_NA_illumina      | EST: PTH156 HTCDL1 Homo sapiens           | 3366.439  |
| 3513 | L38929_at_GI_18860893-A      | PTPRD Protein tyrosine phosphatase,       | 3366.4736 |
| 3514 | S80343_at_GI_40068503-S      | RARS Arginyl-tRNA synthetase              | 3366.7864 |

|      |                              |                                           |           |
|------|------------------------------|-------------------------------------------|-----------|
| 3515 | R78191_at_NA_illumina        | Yi81g04.r1 Homo sapiens cDNA clone        | 3367.0295 |
| 3516 | Y10511_at_NA_illumina        | CD176 protein                             | 3367.0557 |
| 3517 | RC_AA205221_at_NA_illumina   | EST: zq71h09.s1 Stratagene                | 3367.1875 |
| 3518 | U67849_at_NA_illumina        | Beta-galactoside alpha2,6-                | 3367.1924 |
| 3519 | IL10_at_NA_illumina          | No info for gene                          | 3367.1992 |
| 3520 | U62801_at_GI_21327702-S      | Protease M mRNA                           | 3367.2527 |
| 3521 | W26649_at_NA_illumina        | Zinc finger protein 140 (clone pHZ-39)    | 3367.3994 |
| 3522 | RC_AA057839_at_NA_illumina   | EST: zl95d07.s1 Stratagene corneal        | 3367.4526 |
| 3523 | D50487_at_GI_4826689-S       | RNA helicase (HRH1)                       | 3367.5203 |
| 3524 | L11238_s_at_GI_4758459-S     | GP5 Glycoprotein V (platelet)             | 3367.5374 |
| 3525 | M59499_at_NA_illumina        | TISSUE FACTOR PATHWAY INHIBITOR           | 3367.6028 |
| 3526 | X16866_at_NA_illumina        | Cytochrome P-450IID (clone pMP33)         | 3367.6316 |
| 3527 | N44971_at_NA_illumina        | Spectrin, beta, non-erythrocytic 1        | 3367.6343 |
| 3528 | RC_AA608565_at_NA_illumina   | EST: ae54b09.s1 Stratagene lung           | 3367.759  |
| 3529 | RC_AA486412_at_NA_illumina   | EST: ab36c02.s1 Stratagene HeLa cell s3   | 3367.7988 |
| 3530 | W26989_at_NA_illumina        | EST: 19b2 Human retina cDNA randomly      | 3367.8003 |
| 3531 | RC_AA004415_at_GI_32483388-A | EST: zh89b04.s1 Soares fetal liver spleen | 3367.8264 |
| 3532 | X57025_at_GI_19923111-S      | IGF1 Insulin-like growth factor 1         | 3368.0757 |
| 3533 | AA452442_at_GI_22325365-A    | Zx29e11.r1 Soares total fetus Nb2HF8 9w   | 3368.1135 |
| 3534 | RC_AA034012_at_NA_illumina   | EST: zi06c10.s1 Soares fetal liver spleen | 3368.1602 |
| 3535 | R71205_at_NA_illumina        | EST: yi53g09.r1 Homo sapiens cDNA         | 3368.3252 |
| 3536 | AA258463_at_NA_illumina      | N-ethylmaleimide-sensitive factor         | 3368.42   |
| 3537 | RC_AA251330_at_NA_illumina   | EST: zs04g12.s1 NCI_CGAP_GCB1             | 3368.447  |
| 3538 | AA465039_at_NA_illumina      | Homo sapiens 14-3-3 protein mRNA,         | 3368.5408 |
| 3539 | U06452_at_GI_5031912-S       | MLANA Differentiation antigen melan-A     | 3368.5842 |
| 3540 | D83879_at_NA_illumina        | Human DNA sequence from PAC 487J7         | 3368.722  |
| 3541 | AA070326_at_GI_8923906-A     | EST: zm68e02.r1 Stratagene                | 3368.8582 |
| 3542 | X82224_at_GI_42741662-S      | Glutamine transaminase K                  | 3368.8606 |
| 3543 | RC_AA434382_at_NA_illumina   | EST: zw31h04.s1 Soares ovary tumor        | 3369.0308 |
| 3544 | M27318_f_at_GI_10835102-S    | INTERFERON ALPHA-4 PRECURSOR              | 3369.1719 |
| 3545 | RC_AA280895_at_GI_27894286-A | EST: zs97f01.s1 NCI_CGAP_GCB1 Homo        | 3369.2446 |
| 3546 | U42390_at_GI_45439358-S      | Trio mRNA                                 | 3369.2974 |
| 3547 | D26155_s_at_GI_21071049-A    | Transcriptional activator hSNF2a          | 3369.3042 |
| 3548 | U53225_at_GI_23111031-A      | SNX1 Sorting nexin 1                      | 3369.4321 |
| 3549 | U15306_at_GI_22212924-A      | Cysteine-rich sequence-specific DNA-      | 3369.497  |
| 3550 | X05360_at_GI_27886643-A      | CDC2 Cell division cycle 2, G1 to S and   | 3369.5674 |
| 3551 | RC_AA481761_at_NA_illumina   | Phosphatidylinositol glycan, class K      | 3369.588  |
| 3552 | RC_AA598902_at_NA_illumina   | EST: ae41a12.s1 Gessler Wilms tumor       | 3369.7783 |
| 3553 | RC_AA453024_at_NA_illumina   | EST: zx34c07.s1 Soares total fetus        | 3369.8523 |
| 3554 | RC_AA476604_i_at_NA_illumina | EST: zx03d08.s1 Soares total fetus        | 3369.9011 |
| 3555 | M14123_xpt3_at_NA_illumina   | Gag 2 protein from Human endogenous       | 3370.07   |
| 3556 | M84443_s_at_GI_4503896-S     | Galactokinase 2                           | 3370.1345 |
| 3557 | U28150_at_GI_21536379-S      | Adrenoleukodystrophy related protein      | 3370.1775 |

|      |                                |                                            |           |
|------|--------------------------------|--------------------------------------------|-----------|
| 3558 | D30954_at_GI_15812217-S        | EST: Human fetal-lung cDNA 5'-end          | 3370.4639 |
| 3559 | AA149783_at_NA_illumina        | Zo01b04.r1 Stratagene colon (#937204)      | 3370.5679 |
| 3560 | U03911_at_GI_4557760-S         | MSH2 DNA repair protein MSH2               | 3370.7725 |
| 3561 | X03066_at_GI_18641377-S        | HLA-DOB MHC class II protein HLA-DO        | 3370.9084 |
| 3562 | M99587_at_GI_9506784-S         | Homeo box (H6 family) 1                    | 3370.9753 |
| 3563 | H42106_at_NA_illumina          | Integrin, alpha 6                          | 3371.446  |
| 3564 | X71135_at_GI_30061555-S        | Sox3 gene                                  | 3372.0398 |
| 3565 | W24013_at_GI_33359699-A        | Ubiquitin-conjugating enzyme E2G 2         | 3372.0542 |
| 3566 | M23892_s_at_GI_40316936-S      | ALOX15 Arachidonate 15-lipoxygenase        | 3372.0742 |
| 3567 | RC_AA404504_at_GI_28274700-S   | EST: zw38b09.s1 Soares total fetus         | 3372.1775 |
| 3568 | AA120953_at_NA_illumina        | EST: zn83h12.r1 Stratagene lung            | 3372.275  |
| 3569 | L05424_cds2_at_GI_21361192-S   | CD44 gene (cell surface glycoprotein       | 3372.6462 |
| 3570 | RC_AA451905_at_GI_13129039-S   | EST: zx16h03.s1 Soares total fetus         | 3372.6558 |
| 3571 | AA280540_at_GI_5730064-S       | EST: zt10a05.r1 NCI_CGAP_GCB1 Homo         | 3372.8228 |
| 3572 | U41740_at_GI_45359854-S        | Golgin-245 mRNA                            | 3372.9258 |
| 3573 | Z21966_at_GI_37542851-S        | POU6F1 POU homeobox protein                | 3372.9497 |
| 3574 | M93221_at_GI_4505244-S         | M6PR Mannose receptor                      | 3373.0627 |
| 3575 | D90359_at_GI_20357587-A        | TRANSCRIPTION INITIATION FACTOR            | 3373.124  |
| 3576 | X75918_at_NA_illumina          | IMMEDIATE-EARLY RESPONSE                   | 3373.1501 |
| 3577 | AA495909_at_GI_14249561-S      | EST: zw05g04.r1 Soares NhHMPu S1           | 3373.3247 |
| 3578 | X77197_at_GI_11641404-S        | CLCN4 Chloride channel 4                   | 3373.405  |
| 3579 | AA443394_at_GI_23308700-S      | EST: zw87b01.r1 Soares total fetus         | 3373.66   |
| 3580 | RC_AA191612_at_NA_illumina     | EST: zq43g07.s1 Stratagene hNT neuron      | 3373.8015 |
| 3581 | L35854_at_GI_5032304-A         | Dystrophin (dp140) mRNA, 5' end            | 3373.8286 |
| 3582 | M77348_rna1_s_at_GI_42542384-S | Pmel 17 mRNA                               | 3373.8477 |
| 3583 | L17326_s_at_NA_illumina        | Human pre-T/NK cell associated protein     | 3373.9392 |
| 3584 | X60487_at_NA_illumina          | H4/h gene for H4 histone                   | 3374.074  |
| 3585 | RC_AA487907_at_GI_33457343-S   | EST: ab12d06.s1 Stratagene lung            | 3374.0908 |
| 3586 | X07384_at_NA_illumina          | GLI Glioma-associated oncogene homolog     | 3374.3647 |
| 3587 | RC_AA449416_at_NA_illumina     | EST: zx05a09.s1 Soares total fetus         | 3374.37   |
| 3588 | L20852_at_GI_34222154-S        | Leukemia virus receptor 2 (GLVR2) mRNA     | 3374.4565 |
| 3589 | U80628_at_GI_33636700-S        | Thymidine kinase 2 (TK2) mRNA              | 3374.4639 |
| 3590 | L02547_at-2_NA_illumina        | Cleavage stimulation factor, 3' pre-RNA,   | 3374.4692 |
| 3591 | L02547_at_GI_4557490-S         | CSTF1 Cleavage stimulation factor, 3' pre- | 3374.4692 |
| 3592 | U36499_s_at_NA_illumina        | Human lymphoid-specific SP100 homolog      | 3374.492  |
| 3593 | C01686_at_NA_illumina          | EST: HUMGS0012545, Human Gene              | 3374.6    |
| 3594 | X60382_rna1_at_GI_18105031-S   | COL10A1 gene for collagen (alpha-1 type    | 3374.6018 |
| 3595 | R10266_at_NA_illumina          | EST: yf36a10.r1 Homo sapiens cDNA          | 3374.6853 |
| 3596 | R99199_at_NA_illumina          | Transducin-like enhancer of split 2,       | 3374.7217 |
| 3597 | AA243523_at_GI_21361451-S      | EST: zs15e03.r1 NCI_CGAP_GCB1 Homo         | 3374.8472 |
| 3598 | HG3954-HT4224_s_at_NA_illumina | Landsteiner-Wiener Blood Group             | 3374.8567 |
| 3599 | AA256747_at_GI_39932586-S      | EST: zs22a10.r1 NCI_CGAP_GCB1 Homo         | 3374.88   |
| 3600 | X57110_s_at-2_NA_illumina      | Cas-Br-M (murine) ecotropic retroviral     | 3374.8916 |

|      |                               |                                            |           |
|------|-------------------------------|--------------------------------------------|-----------|
| 3601 | X57110_s_at_GI_4885116-S      | CBL Cas-Br-M (murine) ecotropic retroviral | 3374.8916 |
| 3602 | U82469_at_GI_4507736-S        | Tubby like protein 2                       | 3374.9146 |
| 3603 | U19878_at_GI_29568104-S       | Transmembrane protein mRNA                 | 3374.9468 |
| 3604 | L78132_at_GI_42544184-A       | Prostate carcinoma tumor antigen (pcta-1)  | 3374.9907 |
| 3605 | U79272_at_NA_illumina         | Clone 23720 mRNA sequence                  | 3375.071  |
| 3606 | L07956_at_GI_4557618-S        | GBE1 Glucan (1,4-alpha-), branching        | 3375.075  |
| 3607 | R23855_f_at_NA_illumina       | EST: yh48d08.r1 Homo sapiens cDNA          | 3375.2402 |
| 3608 | RC_AA456055_at_GI_40548418-A  | EST: aa03f02.s1 Soares NhHMPu S1           | 3375.2883 |
| 3609 | D79990_at_GI_25777674-A       | KIAA0168 gene                              | 3375.3108 |
| 3610 | RC_AA425879_s_at_GI_41208941- | EST: zw49e02.s1 Soares total fetus         | 3375.3708 |
| 3611 | R11710_at_NA_illumina         | Transcobalamin I (vitamin B12 binding      | 3375.4456 |
| 3612 | U65093_at_GI_19923342-S       | Msg1-related gene 1 (mrg1) mRNA            | 3375.53   |
| 3613 | U90547_at_GI_24497622-S       | Ro/SSA ribonucleoprotein homolog           | 3375.6123 |
| 3614 | U58034_at_GI_23510388-A       | Myotubularin related protein 3 (MTMR3)     | 3375.7256 |
| 3615 | U17195_at_GI_21493044-S       | A-kinase anchor protein (AKAP100) mRNA     | 3375.8523 |
| 3616 | C02549_at_GI_41349473-S       | EST: HUMGS0012449, Human Gene              | 3376.0476 |
| 3617 | AA394174_at_NA_illumina       | EST: zt56d07.r1 Soares ovary tumor         | 3376.3254 |
| 3618 | U82306_at_NA_illumina         | Unknown protein mRNA, partial cds          | 3376.3281 |
| 3619 | N55978_at_NA_illumina         | EST: J4994F Homo sapiens cDNA clone        | 3376.3425 |
| 3620 | W27456_at_NA_illumina         | EST: 31c10 Human retina cDNA randomly      | 3376.3545 |
| 3621 | AA203639_at_GI_36030972-S     | EST: zx58c10.r1 Soares fetal liver spleen  | 3376.367  |
| 3622 | D88532_at_GI_40254447-S       | P55pik                                     | 3376.4102 |
| 3623 | U94332_at_GI_22547122-S       | Osteoprotegerin (OPG) mRNA                 | 3376.4443 |
| 3624 | M98045_at_GI_22024384-S       | Folylpolyglutamate synthetase mRNA         | 3376.5278 |
| 3625 | RC_AA256616_at_NA_illumina    | EST: zr86h05.s1 Soares NhHMPu S1           | 3376.568  |
| 3626 | H14453_at_NA_illumina         | EST: yl25d08.r1 Homo sapiens cDNA          | 3376.5962 |
| 3627 | X66087_at_NA_illumina         | MYBL1 V-myb avian myeloblastosis viral     | 3376.633  |
| 3628 | RC_D20483_i_at_NA_illumina    | BING4                                      | 3376.7725 |
| 3629 | U55936_at_GI_18765730-A       | SNAP-23 mRNA                               | 3376.7876 |
| 3630 | W38594_at_NA_illumina         | EST: zb19e09.r1 Soares fetal lung          | 3376.8132 |
| 3631 | RC_AA365691_at_GI_5729985-S   | EST: EST76520 Pineal gland II Homo         | 3376.8955 |
| 3632 | RC_AA281508_at_NA_illumina    | EST: zt08h01.s1 NCI_CGAP_GCB1 Homo         | 3376.9897 |
| 3633 | U22398_at_GI_4557440-S        | Cdk-inhibitor p57KIP2 (KIP2) mRNA          | 3377.0095 |
| 3634 | Z79693_s_at_NA_illumina       | Protein-tyrosine phosphatase               | 3377.093  |
| 3635 | RC_AA234976_at_NA_illumina    | EST: zr50b04.s1 Soares NhHMPu S1           | 3377.1116 |
| 3636 | L40407_at_GI_21361134-S       | Thyroid receptor interactor (TRIP9) gene   | 3377.1155 |
| 3637 | X83441_at_GI_23199992-S       | DNA ligase IV                              | 3377.1284 |
| 3638 | RC_AA031274_at_GI_14249551-S  | EST: zk15a10.s1 Soares pregnant uterus     | 3377.1487 |
| 3639 | RC_AA421697_at_GI_29570781-S  | EST: zu24a02.s1 Soares NhHMPu S1           | 3377.2563 |
| 3640 | U69127_at_GI_42659054-S       | FUSE binding protein 3 (FBP3) mRNA,        | 3377.2803 |
| 3641 | RC_AA393766_at_GI_45439371-S  | EST: zv64f06.s1 Soares total fetus         | 3377.582  |
| 3642 | Z49155_at_NA_illumina         | HD Huntingtin (Huntington disease)         | 3377.5862 |
| 3643 | L38500_at_GI_5902091-S        | Na+/myo-inositol cotransporter (SLC5A3)    | 3377.614  |

|      |                                |                                           |           |
|------|--------------------------------|-------------------------------------------|-----------|
| 3644 | X81882_at_GI_40254445-S        | For vasopressin activated calcium         | 3377.6665 |
| 3645 | AA280200_at_NA_illumina        | EST: zt05c01.r1 NCI_CGAP_GCB1 Homo        | 3377.6702 |
| 3646 | AA167094_at_GI_21361788-S      | EST: zp05f09.r1 Stratagene ovarian        | 3377.7327 |
| 3647 | J04430_s_at_GI_6138970-S       | ACP5 Acid phosphatase 5, tartrate         | 3377.8728 |
| 3648 | U16811_s_at-2_NA_illumina      | BCL2-antagonist/killer 1                  | 3377.8945 |
| 3649 | U16811_s_at_NA_illumina        | Bak protein mRNA                          | 3377.8945 |
| 3650 | R64521_s_at_NA_illumina        | EST: yi36a11.r1 Homo sapiens cDNA         | 3378.0303 |
| 3651 | RC_C21155_at_GI_33519467-S     | NADH dehydrogenase (ubiquinone) 1 beta    | 3378.2112 |
| 3652 | L41390_at_GI_34485725-S        | Core 2 beta-1,6-N-                        | 3378.3152 |
| 3653 | L09717_at_GI_4504956-A         | LAMP2 Lysosome-associated membrane        | 3378.3628 |
| 3654 | RC_AA112307_at_GI_13236578-S   | EST: zn68f02.s1 Stratagene HeLa cell s3   | 3378.4724 |
| 3655 | U40370_at_GI_21361261-S        | 3',5' cyclic nucleotide phosphodiesterase | 3378.4873 |
| 3656 | RC_AA132239_at_NA_illumina     | EST: zo06h05.s1 Stratagene endothelial    | 3378.5808 |
| 3657 | U51704_at_NA_illumina          | EST: Human mRNA sequence containing       | 3378.7668 |
| 3658 | N36588_at_NA_illumina          | Ubiquitin-conjugating enzyme E2I          | 3378.8547 |
| 3659 | U32331_at_GI_5454007-S         | RIG mRNA, complete sequence               | 3378.8687 |
| 3660 | AA249368_at_GI_40217782-S      | EST: j1535.seq.F Human fetal heart,       | 3378.8796 |
| 3661 | M83216_s_at_GI_44890236-A      | CALD1 Caldesmon                           | 3378.9116 |
| 3662 | RC_AA258158_at_NA_illumina     | EST: zs35b02.s1 NCI_CGAP_GCB1             | 3378.9788 |
| 3663 | X14474_at_NA_illumina          | MICROTUBULE-ASSOCIATED PROTEIN            | 3379.052  |
| 3664 | RC_AA505095_at_NA_illumina     | EST: aa64g12.s1 NCI_CGAP_GCB1             | 3379.0527 |
| 3665 | K03474_at_GI_6138973-S         | MUELLERIAN INHIBITING FACTOR              | 3379.0593 |
| 3666 | RC_AA486182_at_NA_illumina     | EST: ab35a01.s1 Stratagene HeLa cell s3   | 3379.094  |
| 3667 | U52111_rna3_at_GI_7262392-S    | ALD gene (adrenoleukodystrophy protein)   | 3379.139  |
| 3668 | D90084_at_GI_4505684-S         | PDHA1 Pyruvate dehydrogenase              | 3379.1758 |
| 3669 | R14782_at_GI_38201695-S        | EST: yf93a01.r1 Homo sapiens cDNA         | 3379.217  |
| 3670 | RC_AA236209_at_NA_illumina     | EST: zr49g05.s1 Soares NhHMPu S1          | 3379.481  |
| 3671 | H46787_at_NA_illumina          | Aconitase 2, mitochondrial                | 3379.5488 |
| 3672 | L18920_f_at_NA_illumina        | MELANOMA-ASSOCIATED ANTIGEN 2             | 3379.768  |
| 3673 | T85473_at_NA_illumina          | H.sapiens mRNA for NRD1 convertase        | 3379.8445 |
| 3674 | U62317_rna7_at_GI_24308355-S   | Hypothetical protein 384D8_7 gene         | 3379.8774 |
| 3675 | HG3105-HT3281_s_at_NA_illumina | Atpase, Cu2+ Transporting                 | 3379.8948 |
| 3676 | AA282327_at_NA_illumina        | EST: zt12c07.r1 NCI_CGAP_GCB1 Homo        | 3379.8958 |
| 3677 | Z21156_at_NA_illumina          | Homo sapiens mRNA for KIAA0826            | 3379.9949 |
| 3678 | X90780_rna1_at_GI_30141909-S   | Cardiac troponin I gene, exons 1 to 5     | 3380.0405 |
| 3679 | S77410_at_NA_illumina          | AGTR1 Angiotensin receptor 1              | 3380.2964 |
| 3680 | R84933_at_NA_illumina          | EST: yt65d07.r1 Soares retina N2b4HR      | 3380.3247 |
| 3681 | X96584_at_GI_19923725-S        | NOV Nephroblastoma overexpressed          | 3380.4182 |
| 3682 | N34257_at_GI_5032222-S         | Homo sapiens clone 23785 mRNA             | 3380.5325 |
| 3683 | X86019_at_GI_38373694-S        | PRPL-2 protein                            | 3380.726  |
| 3684 | U64573_s_at_GI_4755136-S       | Connexin43 gap junction protein           | 3380.8423 |
| 3685 | AA248589_at_GI_20127651-S      | EST: csh0562.seq.F Human fetal heart,     | 3380.861  |
| 3686 | X52213_s_at_NA_illumina        | Ltk mRNA                                  | 3380.9387 |

|      |                                |                                             |           |
|------|--------------------------------|---------------------------------------------|-----------|
| 3687 | AA092932_at_GI_41350332-S      | Homo sapiens mRNA for beta-tubulin          | 3380.9446 |
| 3688 | RC_AA481862_at_NA_illumina     | EST: zv41b12.s1 Soares ovary tumor          | 3381.0376 |
| 3689 | U89942_at_GI_4505010-S         | Lysyl oxidase-related protein (WS9-14)      | 3381.1753 |
| 3690 | HG2479-HT2575_s_at_NA_illumina | Helix-Loop-Helix Protein Sef2-1d            | 3381.197  |
| 3691 | U78735_at_GI_4501848-S         | ABC3 ATP-binding cassette 3                 | 3381.2166 |
| 3692 | RC_AA147891_at_GI_33188462-S   | EST: zo43f05.s1 Stratagene endothelial      | 3381.3452 |
| 3693 | Z70220_at_NA_illumina          | 5'UTR for unknown protein (clone            | 3381.374  |
| 3694 | RC_AA450287_at_NA_illumina     | Homo sapiens mRNA for KIAA0765              | 3381.3816 |
| 3695 | HG3085-HT3254_s_at_NA_illumina | Phosphodiesterase                           | 3381.4216 |
| 3696 | AA465262_at_NA_illumina        | EST: aa33b06.r1 NCI_CGAP_GCB1               | 3381.4636 |
| 3697 | X63575_s_at_GI_4757807-S       | Plasma membrane calcium ATPase              | 3381.6736 |
| 3698 | M83363_at_GI_40254455-S        | ATP2B4 ATPase, Ca++ transporting,           | 3381.7834 |
| 3699 | M94167_at_GI_7669521-A         | HGL Heregulin alpha                         | 3381.8748 |
| 3700 | U19906_at_GI_33149325-S        | VASOPRESSIN V1A RECEPTOR                    | 3381.957  |
| 3701 | L28821_at_GI_5540099-S         | MANA2 Alpha mannosidase II isozyme          | 3381.98   |
| 3702 | N25110_at_GI_15529995-S        | Human guanine nucleotide exchange           | 3382.071  |
| 3703 | RC_AA481505_at_NA_illumina     | EST: aa34b12.s1 NCI_CGAP_GCB1               | 3382.0962 |
| 3704 | IL4_at_NA_illumina             | No info for gene                            | 3382.1475 |
| 3705 | H21601_at_GI_7304922-S         | EST: yl33e08.r1 Homo sapiens cDNA           | 3382.272  |
| 3706 | M76559_at_GI_4757893-S         | Neuronal DHP-sensitive, voltage-            | 3382.4011 |
| 3707 | S77361_at_GI_24415403-S        | Transcript ch132 [human, RF1,RF48           | 3382.42   |
| 3708 | K03021_at_GI_14702166-A        | PLAT Plasminogen activator, tissue type (t- | 3382.478  |
| 3709 | X63131_s_at_NA_illumina        | PML Probable transcription factor PML       | 3382.7039 |
| 3710 | X01038_rna1_s_at_NA_illumina   | Fetal gene for apolipoprotein AI precursor  | 3382.768  |
| 3711 | H19580_at_NA_illumina          | EST: yn59c08.r1 Homo sapiens cDNA           | 3382.8088 |
| 3712 | RC_AA243346_at_GI_40288186-A   | EST: zs14g12.s1 NCI_CGAP_GCB1               | 3382.8455 |
| 3713 | J04982_at_GI_4502096-S         | ANT1 Adenine nucleotide translocator 1      | 3382.91   |
| 3714 | AA086139_at_GI_21464123-A      | Homo sapiens zinc finger protein (MBLL)     | 3383.044  |
| 3715 | T62487_at_GI_40806183-S        | EST: yc03f05.r1 Homo sapiens cDNA           | 3383.0842 |
| 3716 | M57293_at_NA_illumina          | Parathyroid hormone-related peptide         | 3383.1099 |
| 3717 | RC_AA056026_at_GI_32455233-S   | EST: zf22g05.s1 Soares fetal heart          | 3383.2058 |
| 3718 | L19058_at_GI_28416445-A        | Glutamate receptor (GLUR5) mRNA             | 3383.4387 |
| 3719 | U01833_at_GI_4505336-S         | Nucleotide-binding protein mRNA             | 3383.5356 |
| 3720 | X85133_at_GI_38683864-A        | RBQ-1 mRNA                                  | 3383.5813 |
| 3721 | RC_AA243654_at_NA_illumina     | EST: zr68b05.s1 Soares NhHMPu S1            | 3383.5986 |
| 3722 | L44140_cds4_s_at_GI_5803006-S  | DNL1L gene extracted from Homo sapiens      | 3383.6157 |
| 3723 | U50928_at_GI_33286447-S        | PKD2 Autosomal dominant polycystic          | 3383.6797 |
| 3724 | RC_AA457216_at_NA_illumina     | Interleukin enhancer binding factor 1       | 3383.754  |
| 3725 | D49488_at_GI_4507722-S         | TTPA Tocopherol (alpha) transfer protein    | 3383.7815 |
| 3726 | S77582_at_NA_illumina          | HERVK10/HUMMTV reverse transcriptase        | 3383.8037 |
| 3727 | X90840_at_GI_41327743-S        | Axonal transporter of synaptic vesicles     | 3383.8096 |
| 3728 | AA426525_at_NA_illumina        | EST: zw02f08.r1 Soares NhHMPu S1            | 3383.9377 |
| 3729 | RC_AA121257_at_NA_illumina     | EST: zn30f10.s1 Stratagene                  | 3384.392  |

|      |                               |                                            |           |
|------|-------------------------------|--------------------------------------------|-----------|
| 3730 | RC_AA599653_s_at_GI_38505158- | Homo sapiens TCFL5 mRNA for                | 3384.5713 |
| 3731 | L10343_at_GI_31657130-S       | PI3 Protease inhibitor 3, skin-derived     | 3384.5999 |
| 3732 | RC_AA463737_at_GI_31542717-S  | EST: aa07g07.s1 Soares NhHMPu S1           | 3384.7107 |
| 3733 | AA094517_at_NA_illumina       | Cp0694.seq.F Fetal heart, Lambda ZAP       | 3384.8174 |
| 3734 | RC_AA218733_at_GI_22748930-S  | Homo sapiens clone 23870 mRNA              | 3384.9888 |
| 3735 | U79263_at_GI_31377732-S       | Clone 23760 mRNA, partial cds              | 3385.091  |
| 3736 | U60269_cds1_at_NA_illumina    | Putative polymerase; orf similar to the    | 3385.2915 |
| 3737 | M36429_s_at_GI_20357528-S     | Transducin beta-2 subunit mRNA             | 3385.3677 |
| 3738 | U35139_at_GI_10800414-S       | NECDIN related protein mRNA                | 3385.4546 |
| 3739 | W16714_at_NA_illumina         | EST: zb08a11.r1 Soares fetal lung          | 3385.7417 |
| 3740 | RC_D59298_at_GI_19311005-S    | EST: Human fetal brain cDNA 3'-end GEN-    | 3385.826  |
| 3741 | L10405_at_NA_illumina         | DNA binding protein for surfactant protein | 3385.8352 |
| 3742 | RC_AA598749_at_NA_illumina    | EST: ae49h10.s1 Stratagene lung            | 3385.846  |
| 3743 | L26584_s_at_GI_24797100-A     | Ras-specific guanine nucleotide-releasing  | 3385.8833 |
| 3744 | W27017_at_NA_illumina         | Dystonia 1, torsion (autosomal dominant)   | 3385.9624 |
| 3745 | RC_AA053815_at_NA_illumina    | EST: ze25h09.s1 Soares fetal heart         | 3386.0693 |
| 3746 | AA182909_at_NA_illumina       | EST: zp51d08.r1 Stratagene HeLa cell s3    | 3386.125  |
| 3747 | RC_AA172168_at_NA_illumina    | EST: zp29b04.s1 Stratagene                 | 3386.1465 |
| 3748 | Y10275_at_GI_21614545-S       | L-3-phosphoserine phosphatase              | 3386.1729 |
| 3749 | AA249729_at_NA_illumina       | EST: kk8840.seq.F Human fetal heart,       | 3386.3894 |
| 3750 | AB002299_at_NA_illumina       | Human mRNA for KIAA0301 gene, partial      | 3386.4004 |
| 3751 | H73085_at_NA_illumina         | Ataxia telangiectasia and Rad3 related     | 3386.4792 |
| 3752 | X80230_at_GI_17017983-S       | mRNA (clone C-2k) mRNA for                 | 3386.4954 |
| 3753 | D17516_at_GI_34398688-S       | PACAP receptor                             | 3386.53   |
| 3754 | Y08765_s_at_NA_illumina       | ZFM1 protein alternatively spliced product | 3386.552  |
| 3755 | H58337_at_NA_illumina         | SON DNA binding protein                    | 3386.6194 |
| 3756 | U85265_at_NA_illumina         | Down syndrome candiate region 1            | 3386.63   |
| 3757 | N75612_at_GI_24307920-S       | EST: yw37b05.r1 Homo sapiens cDNA          | 3386.6519 |
| 3758 | D38551_at_GI_5453993-S        | KIAA0078 gene                              | 3386.7285 |
| 3759 | N76264_at_NA_illumina         | EST: yv38a07.r1 Soares fetal liver spleen  | 3386.7334 |
| 3760 | D86973_at_GI_27499680-S       | KIAA0219 gene, partial cds                 | 3386.782  |
| 3761 | AA004987_at_NA_illumina       | Homo sapiens HRIHFB2017 mRNA,              | 3386.832  |
| 3762 | D61391_at_GI_4506130-S        | Phosphoribosypyrophosphate synthetase-     | 3386.8794 |
| 3763 | AA325426_at_NA_illumina       | EST: EST28696 Cerebellum II Homo           | 3386.887  |
| 3764 | N71513_s_at_GI_13376668-S     | EST: yw32h09.r1 Homo sapiens cDNA          | 3386.8884 |
| 3765 | RC_AA435536_at_GI_32698729-S  | EST: zt85e01.s1 Soares testis NHT Homo     | 3386.895  |
| 3766 | AA397968_at_NA_illumina       | EST: zt87a09.r1 Soares testis NHT Homo     | 3387.04   |
| 3767 | AA160000_at_NA_illumina       | EST: zo84a10.r1 Stratagene ovarian         | 3387.1018 |
| 3768 | H64085_at_NA_illumina         | EST: yr57b06.r1 Homo sapiens cDNA          | 3387.1035 |
| 3769 | RC_AA233707_at_NA_illumina    | EST: zr47e07.s1 Soares NhHMPu S1           | 3387.1526 |
| 3770 | L11372_at_NA_illumina         | Protocadherin 43 mRNA, 3' end of cds for   | 3387.1794 |
| 3771 | U25801_at_NA_illumina         | Tax1 binding protein mRNA, partial cds     | 3387.278  |
| 3772 | AA095481_at_GI_38146106-A     | L4676.seq.F Fetal heart, Lambda ZAP        | 3387.3342 |



|      |                                |                                           |           |
|------|--------------------------------|-------------------------------------------|-----------|
| 3773 | L43964_at_GI_7108359-A         | PSEN2 Presenilin 2 (Alzheimer disease 4)  | 3387.7207 |
| 3774 | HG3405-HT3586_at_NA_illumina   | Zinc Finger Protein Hzf3 (Gb:X60153)      | 3387.9158 |
| 3775 | H81497_at_NA_illumina          | EST: yu61e01.r1 Homo sapiens cDNA         | 3387.9375 |
| 3776 | RC_AA447493_at_GI_28372532-S   | EST: zw90g11.s1 Soares total fetus        | 3388.0142 |
| 3777 | RC_AA227567_at_GI_4885636-S    | Target of myb1 (chicken) homolog          | 3388.0967 |
| 3778 | X99886_s_at_GI_22538815-S      | MCP-2 gene                                | 3388.1206 |
| 3779 | RC_AA476917_at_GI_8922535-S    | EST: zu38b09.s1 Soares ovary tumor        | 3388.1719 |
| 3780 | RC_AA159047_at_GI_41282220-S   | EST: zo57f02.s1 Stratagene pancreas       | 3388.2107 |
| 3781 | W49743_at_GI_9910273-S         | Homo sapiens clone 24503 mRNA             | 3388.3687 |
| 3782 | RC_AA449442_at_GI_8923354-S    | EST: zx05d07.s1 Soares total fetus        | 3388.3818 |
| 3783 | X89066_at_GI_27545448-S        | TRPC1 Transient receptor potential        | 3388.4026 |
| 3784 | M60459_at-2_NA_illumina        | Erythropoietin receptor                   | 3388.4622 |
| 3785 | M60459_at_GI_4557561-S         | EPOR Erythropoietin receptor              | 3388.4622 |
| 3786 | R56383_at_GI_16554575-S        | CDC23 (cell division cycle 23, yeast,     | 3388.4773 |
| 3787 | X06482_at_GI_14456712-S        | Theta 1-globin gene                       | 3388.576  |
| 3788 | X54871_at_GI_33943097-S        | RAB5B RAB5B, member RAS oncogene          | 3388.772  |
| 3789 | M90516_at_GI_4503980-S         | GFPT Glutamine-fructose-6-phosphate       | 3388.8127 |
| 3790 | U27516_s_at_NA_illumina        | RAD52 RAD52 (S. cerevisiae) homolog       | 3388.8547 |
| 3791 | K02545_cds2_at_NA_illumina     | TCRB gene extracted from Human T-cell     | 3388.868  |
| 3792 | AA458770_at_GI_33469977-A      | Homo sapiens mRNA for KIAA0917            | 3388.9353 |
| 3793 | U01828_at_NA_illumina          | MAP2 Microtubule-associated protein 2     | 3389.026  |
| 3794 | AA093748_at_NA_illumina        | EST: cl0752.seq.F Fetal heart, Lambda     | 3389.059  |
| 3795 | M60278_at_NA_illumina          | DTR Diphtheria toxin receptor (heparin-   | 3389.0662 |
| 3796 | U79302_at_GI_33695116-S        | Clone 23855 mRNA, partial cds             | 3389.148  |
| 3797 | L06845_at_GI_21269874-A        | CARS Cysteinyl-tRNA synthetase            | 3389.1868 |
| 3798 | M91504_at_NA_illumina          | EST: HUMRTPGEAW Homo sapiens              | 3389.3179 |
| 3799 | AA382517_at_NA_illumina        | EST: EST95736 Testis I Homo sapiens       | 3389.3633 |
| 3800 | D14659_at_GI_31543016-S        | KIAA0103 gene                             | 3389.426  |
| 3801 | HG3930-HT4200_at_NA_illumina   | Stearoyl-Coenzyme Desaturase              | 3389.4375 |
| 3802 | RC_AA058740_at_NA_illumina     | EST: zk70f04.s1 Soares pregnant uterus    | 3389.5024 |
| 3803 | M97347_s_at_NA_illumina        | GCNT1 Glucosaminyl (N-acetyl)             | 3389.5476 |
| 3804 | U24389_s_at_GI_5031882-S       | Lysyl oxidase-like protein gene           | 3389.568  |
| 3805 | RC_AA424331_at_NA_illumina     | Homo sapiens ST15 mRNA, complete cds      | 3389.6184 |
| 3806 | U65406_rna4_at_GI_24497465-A   | KCNJ1 gene (potassium channel ROM-        | 3389.7039 |
| 3807 | RC_AA252069_at_GI_6912427-S    | EST: zr63e01.s1 Soares NhHMPu S1          | 3389.8071 |
| 3808 | D17357_at_GI_4504698-S         | Activin beta-A gene, regulatory sequence  | 3389.875  |
| 3809 | RC_AA417922_s_at_NA_illumina   | EST: zv94b04.s1 Soares NhHMPu S1          | 3389.906  |
| 3810 | AA203630_at_NA_illumina        | EST: zx52h01.r1 Soares fetal liver spleen | 3390.062  |
| 3811 | RC_AA148516_at_NA_illumina     | EST: zl06g07.s1 Soares pregnant uterus    | 3390.1206 |
| 3812 | J00220_cds4_at_NA_illumina     | Ig germline H-chain G-E-A region A:       | 3390.337  |
| 3813 | D15049_at_GI_4506312-S         | PTPRH Protein tyrosine phosphatase        | 3390.3591 |
| 3814 | HG2367-HT2463_s_at_NA_illumina | Trithorax Homolog Hrx                     | 3390.4238 |
| 3815 | W78911_at_NA_illumina          | EST: zh51f10.r1 Soares fetal liver spleen | 3390.5322 |

|      |                              |                                            |           |
|------|------------------------------|--------------------------------------------|-----------|
| 3816 | X16349_s_at_NA_illumina      | Sex hormone-binding globulin               | 3390.5593 |
| 3817 | U50534_at_NA_illumina        | BRCA2 region, mRNA sequence CG003          | 3390.7732 |
| 3818 | AFFX-BioB-M_st_NA_illumina   | AFFX-BioB-M_st (endogenous control)        | 3391.0403 |
| 3819 | AFFX-BioB-M_st-2_NA_illumina | AFFX-BioB-M_st (miscellaneous control -    | 3391.0403 |
| 3820 | S83325_s_at_GI_14589858-A    | Aspartyl(asparaginyl)beta-hydroxylase      | 3391.0522 |
| 3821 | M81182_s_at_GI_10947125-S    | PXMP1 Peroxisomal membrane protein 1       | 3391.0547 |
| 3822 | RC_AA435539_at_GI_33469963-A | Homo sapiens chromosome 19, cosmid         | 3391.0867 |
| 3823 | RC_AA465700_at_NA_illumina   | EST: aa31h05.s1 NCI_CGAP_GCB1              | 3391.23   |
| 3824 | HG537-HT537_at_NA_illumina   | Collagen, Type Viii, Alpha 2               | 3391.286  |
| 3825 | M95740_at_NA_illumina        | IDUA Iduronidase, alpha-L-                 | 3391.3992 |
| 3826 | U73936_at_NA_illumina        | Soluble protein Jagged mRNA, partial cds   | 3391.4988 |
| 3827 | U57099_at_GI_37577150-S      | APEG-1 mRNA                                | 3391.7454 |
| 3828 | Z38133_s_at_GI_4505300-S     | Myosin                                     | 3391.9443 |
| 3829 | RC_AA279168_at_NA_illumina   | EST: zs83a04.s1 NCI_CGAP_GCB1              | 3392.1106 |
| 3830 | U90304_at_GI_42415493-S      | Iroquois-class homeodomain protein IRX-    | 3392.244  |
| 3831 | AA249300_at_GI_38683854-S    | EST: hfe0755.seq.F Human fetal heart,      | 3392.2595 |
| 3832 | M57703_s_at_GI_4505898-S     | PMCH Pro-melanin-concentrating             | 3392.2725 |
| 3833 | RC_AA495938_at_NA_illumina   | EST: zw05h07.s1 Soares NhHMPu S1           | 3392.3052 |
| 3834 | W95777_at_GI_25952121-S      | EST: ze07e02.r1 Soares fetal heart         | 3392.519  |
| 3835 | RC_AA236975_at_NA_illumina   | Homo sapiens hypothetical SBB103 protein   | 3392.5508 |
| 3836 | M17254_s_at_GI_7657065-A     | TRANSFORMING PROTEIN ERG                   | 3392.6526 |
| 3837 | T58094_at_NA_illumina        | EST: yb26b05.r1 Homo sapiens cDNA          | 3392.7102 |
| 3838 | U04270_at_GI_26051270-A      | Putative potassium channel subunit (h-erg) | 3392.7292 |
| 3839 | D86957_at_NA_illumina        | KIAA0202 gene, partial cds                 | 3392.7332 |
| 3840 | D50640_at_GI_40254433-S      | DNA for phosphodiesterase 3B               | 3392.7356 |
| 3841 | W26472_at_NA_illumina        | EGF-like-domain, multiple 5                | 3392.7769 |
| 3842 | D82712_at_GI_38683798-S      | EST: similar to none, mRNA sequence.       | 3392.7969 |
| 3843 | U40462_at_GI_31657112-S      | Ikaros/LyF-1 homolog (hIk-1) mRNA          | 3392.858  |
| 3844 | X70040_at_GI_4505264-S       | MST1R Protein-tyrosine kinase RON          | 3392.9514 |
| 3845 | RC_AA478787_at_GI_21735610-S | EST: zv20c07.s1 Soares NhHMPu S1           | 3393.1013 |
| 3846 | M23668_at_GI_36054077-S      | ADRENODOXIN PRECURSOR                      | 3393.167  |
| 3847 | M33518_at_GI_18375627-A      | LARGE PROLINE-RICH PROTEIN BAT2            | 3393.1672 |
| 3848 | RC_D20297_at_NA_illumina     | EST: Human HL60 3'directed Mbol cDNA,      | 3393.1907 |
| 3849 | M94065_s_at_NA_illumina      | Dihydroorotate dehydrogenase               | 3393.2039 |
| 3850 | AA093348_at_NA_illumina      | Secreted frizzled-related protein 1        | 3393.2922 |
| 3851 | RC_D20168_at_NA_illumina     | EST: Human HL60 3'directed Mbol cDNA,      | 3393.3418 |
| 3852 | D88799_at_GI_14270507-A      | Cadherin, partial cds                      | 3393.3884 |
| 3853 | D83782_at_GI_24307942-S      | KIAA0199 gene, partial cds                 | 3393.4106 |
| 3854 | HG4480-HT4833_at_NA_illumina | Collagen, Type Vi, Alpha 2, N-Terminal     | 3393.4915 |
| 3855 | RC_AA287042_at_GI_42542387-S | EST: zs57e07.s1 NCI_CGAP_GCB1              | 3393.532  |
| 3856 | W28229_at_NA_illumina        | EST: 43h11 Human retina cDNA randomly      | 3393.541  |
| 3857 | M96759_rna1_at_GI_19743809-S | Rod outer segment membrane protein 1       | 3393.7292 |
| 3858 | RC_AA478109_at_NA_illumina   | EST: zt89d04.s1 Soares testis NHT Homo     | 3393.8    |

|      |                                |                                            |           |
|------|--------------------------------|--------------------------------------------|-----------|
| 3859 | U90549_at_GI_23238232-S        | Non-histone chromosomal protein (NHC)      | 3393.8901 |
| 3860 | S82471_s_at_NA_illumina        | SSX3=Kruppel-associated box containing     | 3393.8948 |
| 3861 | U20240_at_GI_34452718-S        | CEBPG CCAAT/enhancer binding protein       | 3393.9048 |
| 3862 | U24152_at_GI_42794768-S        | P21-activated protein kinase (Pak1) gene   | 3393.987  |
| 3863 | Z80780_f_at_GI_21396483-S      | H2B/h gene                                 | 3394.0073 |
| 3864 | L03840_s_at_GI_13112049-A      | FGFR4 Fibroblast growth factor receptor 4  | 3394.1248 |
| 3865 | X82850_s_at_NA_illumina        | TTF1 Transcription termination factor, RNA | 3394.2131 |
| 3866 | AA076003_at_NA_illumina        | Zm89c09.r1 Stratagene ovarian cancer       | 3394.2993 |
| 3867 | U34683_at_GI_30581166-S        | GSS Glutathione synthetase                 | 3394.3516 |
| 3868 | AA085232_at_GI_7661591-S       | EST: zn12d03.r1 Stratagene hNT neuron      | 3394.3594 |
| 3869 | U50196_at_NA_illumina          | ADK Adenosine kinase                       | 3394.503  |
| 3870 | U50196_at-2_NA_illumina        | Adenosine kinase                           | 3394.503  |
| 3871 | D63485_at_GI_7661945-S         | KIAA0151 gene                              | 3394.5596 |
| 3872 | R69785_at_GI_40255048-S        | EST: yi40f12.r1 Homo sapiens cDNA clone    | 3394.6252 |
| 3873 | AA442604_at_NA_illumina        | EST: zv57h07.r1 Soares testis NHT Homo     | 3394.678  |
| 3874 | R98280_at_GI_24307922-S        | Homo sapiens mRNA for putative ribulose-   | 3394.8008 |
| 3875 | L23333_s_at_GI_19923244-S      | Corticotropin releasing factor receptor    | 3394.8076 |
| 3876 | RC_AA419263_at_NA_illumina     | EST: zv35c07.s1 Soares ovary tumor         | 3394.8242 |
| 3877 | M96740_at_GI_5031944-S         | HELIX-LOOP-HELIX PROTEIN 2                 | 3394.8303 |
| 3878 | U90437_at_GI_10346134-S        | RP1 homolog mRNA, 3'UTR region             | 3394.8306 |
| 3879 | RC_AA121920_at_GI_38195085-S   | EST: zn97h10.s1 Stratagene fetal retina    | 3394.8582 |
| 3880 | U82818_at_NA_illumina          | Uncoupling protein 3 mRNA                  | 3395.0544 |
| 3881 | RC_AA054641_at_NA_illumina     | EST: zf57c05.s1 Soares retina N2b4HR       | 3395.1335 |
| 3882 | HG2743-HT2846_s_at_NA_illumina | Caldesmon 1, Alt. Splice 4, Non-Muscle     | 3395.1384 |
| 3883 | RC_AA406142_at_GI_7657640-S    | Homo sapiens mRNA for dTDP-D-glucose       | 3395.1582 |
| 3884 | D16626_at_GI_4809282-S         | HAL Histidine ammonia-lyase                | 3395.1943 |
| 3885 | D16626_at-2_NA_illumina        | Histidine ammonia-lyase                    | 3395.1943 |
| 3886 | AB002343_at_GI_14165424-A      | KIAA0345 gene product                      | 3395.2441 |
| 3887 | Z20462_at_NA_illumina          | EST: H. sapiens putatively transcribed     | 3395.2808 |
| 3888 | W26091_at_NA_illumina          | EST: 20h8 Human retina cDNA randomly       | 3395.345  |
| 3889 | RC_AA039473_at_NA_illumina     | EST: zf06d11.s1 Soares fetal heart         | 3395.451  |
| 3890 | X17576_at_GI_33519482-S        | NCK Non-catalytic region of tyrosine       | 3395.6133 |
| 3891 | HG4321-HT4591_at_NA_illumina   | Ahnak-Related Sequence                     | 3395.7593 |
| 3892 | X12791_at_GI_4507212-S         | SRP19 Signal recognition particle 19 kD    | 3395.8198 |
| 3893 | X14253_s_at_NA_illumina        | TDGF1 Teratocarcinoma-derived growth       | 3395.8467 |
| 3894 | AA426156_at_GI_34335289-S      | EST: zv83a08.r1 Soares total fetus         | 3395.8826 |
| 3895 | L10123_at_NA_illumina          | Surfactant protein A mRNA                  | 3395.9038 |
| 3896 | RC_AA424171_at_NA_illumina     | Human SNARE protein Ykt6 (YKT6)            | 3395.9482 |
| 3897 | D60964_at_NA_illumina          | EST: Human fetal brain cDNA 5'-end GEN-    | 3396.188  |
| 3898 | RC_AA477133_at_NA_illumina     | EST: zu37f05.s1 Soares ovary tumor         | 3396.3525 |
| 3899 | D87447_at_NA_illumina          | KIAA0258 gene                              | 3396.3743 |
| 3900 | HG3928-HT4198_at_NA_illumina   | Surfacant Protein Sp-A1 Delta              | 3396.3914 |
| 3901 | U94836_at_GI_34147634-S        | ERPROT 213-21 mRNA                         | 3396.5522 |

|      |                              |                                           |           |
|------|------------------------------|-------------------------------------------|-----------|
| 3902 | X52599_at_GI_4505390-S       | NGFB Nerve growth factor beta             | 3396.6094 |
| 3903 | D81932_at_GI_13376169-S      | Human fetal brain cDNA 5'-end GEN-        | 3396.6477 |
| 3904 | Z29066_s_at_GI_4505372-S     | Nek2 mRNA for protein kinase              | 3396.6558 |
| 3905 | AA092192_at_GI_24797087-A    | Peroxisome biogenesis factor 10           | 3396.6926 |
| 3906 | U11877_at_NA_illumina        | Interleukin-8 receptor type B (IL8RB)     | 3396.716  |
| 3907 | D29810_at_NA_illumina        | Unknown product, partial cds              | 3396.7595 |
| 3908 | D29810_at-2_NA_illumina      | Human mRNA for unknown product, partial   | 3396.7595 |
| 3909 | M92424_at-2_NA_illumina      | Mouse double minute 2, human homolog      | 3396.7803 |
| 3910 | M92424_at_GI_6031177-A       | MDM2 Mouse double minute 2, human         | 3396.7803 |
| 3911 | RC_AA252621_at_GI_21040246-S | EST: zs14d09.s1 NCI_CGAP_GCB1             | 3396.8975 |
| 3912 | X00237_at_NA_illumina        | F variable segment 5' to antithrombin III | 3396.9065 |
| 3913 | AA039789_at_NA_illumina      | EST: zf10e10.r1 Soares fetal heart        | 3396.907  |
| 3914 | J00207_rna2_at_GI_11067750-S | IFNA gene (interferon alpha-a) extracted  | 3396.9192 |
| 3915 | L37378_at_GI_4504218-S       | Guanylyl cyclase (RetGC-2) mRNA           | 3396.9275 |
| 3916 | AA020927_at_NA_illumina      | EST: ze64e11.r1 Soares retina N2b4HR      | 3396.9905 |
| 3917 | AA447450_at_GI_39812114-S    | Zw93h11.r1 Soares total fetus Nb2HF8 9w   | 3397.0469 |
| 3918 | M81637_at_GI_21614521-S      | GRANCALCIN                                | 3397.234  |
| 3919 | RC_AA436192_at_NA_illumina   | EST: zv22f01.s1 Soares NhHMPu S1          | 3397.4155 |
| 3920 | RC_AA227557_at_GI_19923537-S | EST: zr55d06.s1 Soares NhHMPu S1          | 3397.5383 |
| 3921 | U32645_at_GI_4503554-S       | Myeloid elf-1 like factor (MEF) mRNA      | 3397.5818 |
| 3922 | U61981_at_NA_illumina        | MSH3 MutS (E. coli) homolog 3             | 3397.6943 |
| 3923 | W26982_at_NA_illumina        | EST: 17a9 Human retina cDNA randomly      | 3397.7253 |
| 3924 | D16532_at_GI_40254472-S      | VLDLR Very low density lipoprotein        | 3397.7793 |
| 3925 | X52221_at_GI_40068510-S      | ERCC2 gene, exons 1 & 2 (partial)         | 3397.795  |
| 3926 | L08177_at_GI_14577915-S      | CMKBR7 Chemokine (C-C) receptor 7         | 3397.827  |
| 3927 | D61111_at_NA_illumina        | Human fetal brain cDNA 5'-end GEN-        | 3397.855  |
| 3928 | J04132_at_GI_37595563-A      | CD3Z CD3Z antigen, zeta polypeptide       | 3397.8723 |
| 3929 | Y08417_s_at_NA_illumina      | CHRN3 Cholinergic receptor, nicotinic,    | 3397.976  |
| 3930 | RC_AA007402_at_NA_illumina   | EST: zh98e06.s1 Soares fetal liver spleen | 3397.995  |
| 3931 | X02910_at_GI_25952110-S      | TNF Tumor necrosis factor                 | 3398.2395 |
| 3932 | RC_AA425726_at_GI_29789286-S | EST: zw49c03.s1 Soares total fetus        | 3398.373  |
| 3933 | RC_AA609427_at_GI_31377662-S | EST: zu72d03.s1 Soares testis NHT Homo    | 3398.722  |
| 3934 | AA429838_at_NA_illumina      | Zw59a09.r1 Soares total fetus Nb2HF8 9w   | 3398.7922 |
| 3935 | D87432_at_GI_4507052-S       | KIAA0245 gene                             | 3398.8652 |
| 3936 | RC_AA457364_at_GI_23943784-S | EST: aa86a02.s1 Stratagene fetal retina   | 3398.95   |
| 3937 | S62539_at_GI_5031804-S       | Insulin receptor substrate-1 [human,      | 3398.9995 |
| 3938 | W37779_at_NA_illumina        | EST: zc13c09.r1 Soares parathyroid tumor  | 3399.041  |
| 3939 | U78722_at_GI_30181234-S      | Zinc finger gene                          | 3399.0693 |
| 3940 | U79295_at_NA_illumina        | Clone 23961 mRNA sequence                 | 3399.2917 |
| 3941 | U79295_at-2_NA_illumina      | Human clone 23961 mRNA sequence           | 3399.2917 |
| 3942 | M64930_at_GI_32307116-A      | Protein phosphatase 2A beta subunit       | 3399.2998 |
| 3943 | H08988_at_NA_illumina        | EST: yl96d07.r1 Homo sapiens cDNA         | 3399.3599 |
| 3944 | L40388_at_NA_illumina        | Thyroid receptor interactor (TRIP15)      | 3399.4094 |

|      |                                |                                              |           |
|------|--------------------------------|----------------------------------------------|-----------|
| 3945 | N28707_at_NA_illumina          | EST: yx66d11.r1 Homo sapiens cDNA            | 3399.4404 |
| 3946 | U43586_at_NA_illumina          | Kinase suppressor of ras-1 (KSR1) mRNA,      | 3399.4412 |
| 3947 | U43586_at-2_NA_illumina        | Kinase suppressor of ras                     | 3399.4412 |
| 3948 | RC_AA430552_at_GI_4506136-S    | Proline-rich Gla (G-carboxylglutamic acid)   | 3399.5256 |
| 3949 | RC_AA035213_s_at_GI_40807461-  | EST: ze24a05.s1 Soares fetal heart           | 3399.5557 |
| 3950 | U79258_at_GI_34304320-A        | Clone 23732 mRNA, partial cds                | 3399.6387 |
| 3951 | RC_AA017161_at_GI_38505216-S   | EST: ze36a01.s1 Soares retina N2b4HR         | 3399.6848 |
| 3952 | AA383737_at_NA_illumina        | EST: EST97157 Testis I Homo sapiens          | 3399.7173 |
| 3953 | RC_AA453815_at_NA_illumina     | EST: aa19h06.s1 Soares NhHMPu S1             | 3399.9185 |
| 3954 | AA410786_s_at_NA_illumina      | EST: zt35b09.r1 Soares ovary tumor           | 3399.9507 |
| 3955 | U72514_at_GI_31652261-S        | C2f mRNA                                     | 3400.0205 |
| 3956 | U53445_at_GI_7657036-A         | Ovarian cancer downregulated myosin          | 3400.1526 |
| 3957 | RC_AA242776_at_NA_illumina     | Homo sapiens malate dehydrogenase            | 3400.176  |
| 3958 | AA371418_at_GI_34147587-S      | EST: EST83247 Prostate gland I Homo          | 3400.1907 |
| 3959 | X63755_at_NA_illumina          | High-sulphur keratin                         | 3400.2095 |
| 3960 | RC_AA424175_at_NA_illumina     | EST: zv81e01.s1 Soares total fetus           | 3400.2205 |
| 3961 | S81916_at_GI_22095338-S        | Phosphoglycerate kinase {alternatively       | 3400.3203 |
| 3962 | X71490_at_GI_34335257-S        | ATP6E ATPase, H+ transporting,               | 3400.4697 |
| 3963 | AA096079_at_NA_illumina        | EST: I7472.seq.F Fetal heart, Lambda         | 3400.4812 |
| 3964 | HG174-HT174_at_NA_illumina     | Desmoplakin I                                | 3400.497  |
| 3965 | RC_AA425921_at_GI_6005787-S    | Homo sapiens I-1 receptor candidate          | 3400.554  |
| 3966 | HG2981-HT3938_s_at_NA_illumina | Epican, Alt. Splice 12                       | 3400.5566 |
| 3967 | AA174190_at_GI_36030993-S      | EST: PTH226 HTCDL1 Homo sapiens              | 3400.648  |
| 3968 | U17566_at_GI_34808709-A        | SLC19A1 Solute carrier family 19 (folate     | 3400.7556 |
| 3969 | Z48519_s_at_GI_28212219-S      | XG gene (clone RACE5)                        | 3400.8376 |
| 3970 | RC_AA608730_at_GI_24431963-S   | EST: ae56e12.s1 Stratagene lung              | 3400.8997 |
| 3971 | D42039_at_GI_42660520-S        | KIAA0081 gene, partial cds                   | 3401.0718 |
| 3972 | RC_AA054704_at_NA_illumina     | EST: zk69h02.s1 Soares pregnant uterus       | 3401.281  |
| 3973 | L06133_at_GI_4502320-S         | ATP7A ATPase, Cu++ transporting, alpha       | 3401.288  |
| 3974 | J02960_cds1_s_at_GI_15718673-S | Unknown protein gene extracted from          | 3401.2903 |
| 3975 | U65404_at_GI_38455403-S        | Erythroid-specific transcription factor EKLF | 3401.396  |
| 3976 | W04798_at_NA_illumina          | EST: za81b04.r1 Soares fetal lung            | 3401.4172 |
| 3977 | M81750_at_GI_4505226-S         | MNDA Myeloid cell nuclear differentiation    | 3401.4265 |
| 3978 | AA282621_at_NA_illumina        | EST: zs90e05.r1 NCI_CGAP_GCB1 Homo           | 3401.476  |
| 3979 | RC_AA088263_at_GI_41349447-S   | EST: zl82e05.s1 Stratagene colon             | 3401.4883 |
| 3980 | RC_AA621316_at_NA_illumina     | EST: af85a01.s1 Soares testis NHT Homo       | 3401.494  |
| 3981 | RC_AA435678_at_NA_illumina     | Dynein, axonemal, light intermediate         | 3401.653  |
| 3982 | X58723_at_NA_illumina          | MDR1 (multidrug resistance) gene for P-      | 3401.7297 |
| 3983 | RC_AA234899_at_NA_illumina     | EST: zs36c07.s1 Soares NhHMPu S1             | 3401.8022 |
| 3984 | X53414_at_GI_4557288-S         | AGXT Alanine-glyoxylate aminotransferase     | 3401.925  |
| 3985 | RC_AA449716_at_GI_29550920-A   | EST: zx09b04.s1 Soares total fetus           | 3402.0183 |
| 3986 | U73799_at_GI_13259507-A        | Dynactin mRNA, partial cds                   | 3402.1057 |
| 3987 | D21255_at_GI_16306531-A        | CDH11 Cadherin 11 (OB-cadherin)              | 3402.1804 |

|      |                              |                                             |           |
|------|------------------------------|---------------------------------------------|-----------|
| 3988 | X82279_s_at_NA_illumina      | Fas, Apo-1 gene (promoter and exon I)       | 3402.3232 |
| 3989 | RC_AA056735_at_NA_illumina   | KIAA0755 gene product                       | 3402.4907 |
| 3990 | AA424086_at_NA_illumina      | Homo sapiens clone 192 Rer1 mRNA,           | 3402.845  |
| 3991 | M65134_s_at_GI_38016946-S    | C5 Complement component C5                  | 3402.9912 |
| 3992 | W28585_at_NA_illumina        | Non-histone chromosome protein 2 (S.        | 3403.05   |
| 3993 | M20030_f_at_NA_illumina      | Small proline rich protein (sprll) mRNA,    | 3403.184  |
| 3994 | RC_AA291321_at_GI_31652246-S | EST: zs20h02.s1 NCI_CGAP_GCB1               | 3403.2    |
| 3995 | X98405_at_NA_illumina        | Myelin associated glycoprotein              | 3403.232  |
| 3996 | U41745_at_GI_38202253-S      | PDGF associated protein mRNA                | 3403.3096 |
| 3997 | Z47553_at_GI_4503760-S       | FMO5 Flavin containing monooxygenase 5      | 3403.3574 |
| 3998 | X91906_s_at_NA_illumina      | Chloride channel 5                          | 3403.4336 |
| 3999 | RC_AA427579_at_NA_illumina   | Homo sapiens regulator of G protein         | 3403.5105 |
| 4000 | RC_AA456841_at_GI_8923105-S  | EST: aa38g07.s1 NCI_CGAP_GCB1               | 3403.5127 |
| 4001 | D10704_at_NA_illumina        | CHK Choline kinase                          | 3403.5305 |
| 4002 | N52656_s_at_GI_11641418-S    | EST: yz06a09.r1 Homo sapiens cDNA           | 3403.5576 |
| 4003 | X52520_at_GI_4507368-S       | TAT Tyrosine aminotransferase               | 3403.629  |
| 4004 | X90908_at_GI_4557582-S       | Ileal lipid binding protein mRNA            | 3403.7395 |
| 4005 | HG3731-HT4001_at_NA_illumina | Immunoglobulin Heavy Chain, Vdjrc           | 3403.7654 |
| 4006 | N28028_at_NA_illumina        | Homo sapiens mRNA from chromosome           | 3403.8115 |
| 4007 | W26315_at_NA_illumina        | EST: 27g3 Human retina cDNA randomly        | 3403.9055 |
| 4008 | W27112_at_GI_9910205-S       | EST: 20d7 Human retina cDNA randomly        | 3403.913  |
| 4009 | W16821_at_NA_illumina        | EST: zb11d08.r1 Soares fetal lung           | 3403.9382 |
| 4010 | RC_AA134425_at_NA_illumina   | EST: zo25a10.s1 Stratagene colon            | 3403.948  |
| 4011 | U68111_at-2_NA_illumina      | PROTEIN PHOSPHATASE INHIBITOR 2             | 3403.9778 |
| 4012 | U68111_at_GI_34147499-S      | PROTEIN PHOSPHATASE INHIBITOR 2             | 3403.9778 |
| 4013 | RC_AA112149_at_NA_illumina   | EST: zm64d02.s1 Stratagene fibroblast       | 3404.1863 |
| 4014 | AF005043_at_GI_4505608-S     | Poly(ADP-ribose) glycohydrolase (hPARG)     | 3404.2043 |
| 4015 | RC_AA598397_at_NA_illumina   | EST: ae40d12.s1 Gessler Wilms tumor         | 3404.2422 |
| 4016 | J03810_at_GI_4557850-S       | SLC2A2 Solute carrier family 2 (facilitated | 3404.2493 |
| 4017 | Z22555_at_GI_33620766-S      | Encoding CLA-1 mRNA                         | 3404.3284 |
| 4018 | HG4747-HT5195_at_NA_illumina | Nadh-Ubiquinone Oxidoreductase, 51 Kda      | 3404.566  |
| 4019 | U18422_at_NA_illumina        | DP2 (Humdp2) mRNA                           | 3404.6287 |
| 4020 | RC_AA236493_at_GI_37574727-A | EST: zr75c10.s1 Soares NhHMPu S1            | 3404.6763 |
| 4021 | RC_AA279137_at_NA_illumina   | EST: zs81g10.s1 NCI_CGAP_GCB1               | 3404.6914 |
| 4022 | D13635_at_NA_illumina        | KIAA0010 gene                               | 3404.826  |
| 4023 | RC_D20195_s_at_GI_34147338-A | EST: Human HL60 3'directed MboI cDNA,       | 3404.8281 |
| 4024 | RC_AA234717_at_NA_illumina   | EST: zr78b05.s1 Soares NhHMPu S1            | 3404.8738 |
| 4025 | RC_AA001970_at_NA_illumina   | EST: zh83f07.s1 Soares fetal liver spleen   | 3404.9958 |
| 4026 | Z26317_at_GI_4503402-S       | DSG2 Desmoglein 2                           | 3405.0566 |
| 4027 | M60299_at_NA_illumina        | Alpha-1 collagen type II gene, exons 1, 2   | 3405.1194 |
| 4028 | D10202_at_GI_20070128-S      | PTAFR Platelet activating factor receptor   | 3405.1216 |
| 4029 | X87613_at_GI_34452708-A      | Skeletal muscle abundant protein            | 3405.2227 |
| 4030 | U02566_s_at_GI_27597077-S    | TYRO3 Receptor protein-tyrosine kinase      | 3405.391  |

|      |                                |                                            |           |
|------|--------------------------------|--------------------------------------------|-----------|
| 4031 | AA032263_at_NA_illumina        | Transcription factor 12 (HTF4, helix-loop- | 3405.4092 |
| 4032 | W79496_at_NA_illumina          | EST: zd78h06.r1 Soares fetal heart         | 3405.4136 |
| 4033 | RC_AA236893_at_GI_32813444-S   | EST: zs43a08.s1 Soares NhHMPu S1           | 3405.58   |
| 4034 | RC_D25917_at_GI_22749220-S     | EST: Human colon 3'directed Mbol cDNA,     | 3405.6084 |
| 4035 | L09230_s_at_NA_illumina        | CMKBR1 Chemokine (C-C) receptor 1          | 3405.621  |
| 4036 | AA488122_at_NA_illumina        | Pyruvate dehydrogenase kinase,             | 3405.6519 |
| 4037 | RC_AA485243_at_GI_30794215-S   | EST: aa41e07.s1 NCI_CGAP_GCB1              | 3405.681  |
| 4038 | RC_AA037357_i_at_NA_illumina   | EST: zc03c04.s1 Soares parathyroid         | 3405.6912 |
| 4039 | U62438_at-2_NA_illumina        | Cholinergic receptor, nicotinic, beta      | 3405.7773 |
| 4040 | U62438_at_GI_38455424-S        | CHRN3 Cholinergic receptor, nicotinic,     | 3405.7773 |
| 4041 | W45616_at_NA_illumina          | EST: zc26e07.r1 Soares senescent           | 3405.786  |
| 4042 | X02874_at_GI_8051622-A         | OIAS (2'-5') oligoadenylate synthetase     | 3405.869  |
| 4043 | RC_AA406570_at_NA_illumina     | EST: zv11b06.s1 Soares NhHMPu S1           | 3405.9346 |
| 4044 | AA091932_at_NA_illumina        | Dynamin-like protein                       | 3406.026  |
| 4045 | U58091_at_GI_28372492-S        | Hs-cul-4B mRNA, partial cds                | 3406.115  |
| 4046 | W27374_at_GI_5729737-S         | Homo sapiens 10kD protein (BC10)           | 3406.4597 |
| 4047 | U09877_at_GI_20631986-S        | Helicase-like protein (HLP) mRNA           | 3406.467  |
| 4048 | RC_AA280928_at_NA_illumina     | EST: zs98e01.s1 NCI_CGAP_GCB1              | 3406.5605 |
| 4049 | RC_AA478023_at_NA_illumina     | EST: zu40b12.s1 Soares ovary tumor         | 3406.6602 |
| 4050 | U49070_at_GI_5453897-S         | Peptidyl-prolyl isomerase and essential    | 3406.7734 |
| 4051 | L43576_at_NA_illumina          | (clone EST02946) mRNA                      | 3406.8442 |
| 4052 | M63835_at_GI_24431940-S        | HIGH AFFINITY IMMUNOGLOBULIN               | 3406.9111 |
| 4053 | L38820_at_GI_34419629-S        | CD1D CD1D antigen, d polypeptide           | 3406.938  |
| 4054 | IL2_at_NA_illumina             | No info for gene                           | 3406.9487 |
| 4055 | M91217_at_GI_14149711-S        | EST: HUMRTPGEB Homo sapiens cDNA.          | 3407.0815 |
| 4056 | D86956_at_GI_42544158-S        | KIAA0201 gene                              | 3407.127  |
| 4057 | H83573_s_at_NA_illumina        | Tumor protein D52-like 2                   | 3407.1367 |
| 4058 | RC_AA017521_at_NA_illumina     | EST: ze37f04.s1 Soares retina N2b4HR       | 3407.1418 |
| 4059 | RC_AA504251_at_NA_illumina     | EST: aa61a07.s1 NCI_CGAP_GCB1              | 3407.145  |
| 4060 | RC_AA489009_at_NA_illumina     | EST: aa54d11.s1 NCI_CGAP_GCB1              | 3407.1492 |
| 4061 | U79247_at_GI_7657442-A         | Clone 23599 mRNA sequence                  | 3407.1536 |
| 4062 | U20648_at_GI_38564321-S        | ZNF154 Zinc finger protein 154 (pHZ-92)    | 3407.186  |
| 4063 | AA192484_at_NA_illumina        | EST: zq02e02.r1 Stratagene muscle          | 3407.2368 |
| 4064 | U54617_at_GI_33589822-S        | PDK4 Pyruvate dehydrogenase kinase,        | 3407.2446 |
| 4065 | AA084854_at_NA_illumina        | Zn13d08.r1 Stratagene hNT neuron           | 3407.6855 |
| 4066 | R76066_at_GI_15011899-A        | EST: yi60f07.r1 Homo sapiens cDNA clone    | 3407.6995 |
| 4067 | M14745_at_NA_illumina          | BCL2 B cell lymphoma protein 2             | 3407.7415 |
| 4068 | U96769_rna1_at_GI_4502798-S    | Chondroadherin gene, 5'flanking region     | 3407.84   |
| 4069 | U96769_rna1_at-2_NA_illumina   | Homo sapiens chondroadherin gene,          | 3407.84   |
| 4070 | AA095300_at_NA_illumina        | EST: I2325.seq.F Fetal heart, Lambda       | 3408.0005 |
| 4071 | F15248_at_GI_4508016-S         | Zinc finger protein 207                    | 3408.036  |
| 4072 | X78926_at_GI_23308728-A        | ZNF3 Zinc finger protein 3 (A8-51)         | 3408.1887 |
| 4073 | HG2649-HT2745_s_at_NA_illumina | Serine/Threonine Protein Kinase Cdk3       | 3408.3647 |

|      |                              |                                            |           |
|------|------------------------------|--------------------------------------------|-----------|
| 4074 | M87338_at_GI_31563535-A      | RFC2 Replication factor C (activator 1) 2, | 3408.4055 |
| 4075 | M27749_r_at_GI_23110979-A    | Immunoglobulin-related 14.1 protein        | 3408.5244 |
| 4076 | X52009_s_at_GI_4504018-S     | Alpha-1 strychnine binding subunit of      | 3408.742  |
| 4077 | U73167_cds2_s_at_NA_illumina | H_LUCA14.2a gene extracted from            | 3408.7485 |
| 4078 | U20158_at_GI_7382491-S       | 76 kDa tyrosine phosphoprotein SLP-76      | 3408.8708 |
| 4079 | U68488_at_GI_30795200-A      | HTR7 5-hydroxytryptamine (serotonin)       | 3408.9885 |
| 4080 | L15326_s_at_NA_illumina      | PTGS2 Prostaglandin-endoperoxide           | 3409.074  |
| 4081 | AA262132_at_GI_7661669-S     | EST: zs23b10.r1 NCI_CGAP_GCB1 Homo         | 3409.2214 |
| 4082 | RC_AA463253_at_NA_illumina   | EST: zx97g01.s1 Soares NhHMPu S1           | 3409.2458 |
| 4083 | M60828_at_GI_15147344-S      | FGF7 Fibroblast growth factor 7            | 3409.3132 |
| 4084 | RC_AA035514_at_NA_illumina   | EST: zk26b02.s1 Soares pregnant uterus     | 3409.3325 |
| 4085 | D87443_at_NA_illumina        | KIAA0254 gene                              | 3409.3542 |
| 4086 | U04325_cds3_at_NA_illumina   | PSG11 gene (pregnancy-specific beta-1-     | 3409.3555 |
| 4087 | U69611_at_GI_11497005-A      | TNF-alpha converting enzyme mRNA           | 3409.3967 |
| 4088 | RC_AA423974_at_NA_illumina   | EST: zv62h04.s1 Soares testis NHT Homo     | 3409.535  |
| 4089 | RC_AA401533_at_NA_illumina   | EST: zu68a10.s1 Soares testis NHT Homo     | 3409.682  |
| 4090 | HG4115-HT4385_at_NA_illumina | Olfactory Receptor Or17-210                | 3409.7168 |
| 4091 | AA419464_at_NA_illumina      | Zv01h10.r1 NCI_CGAP_GCB1 Homo              | 3409.7798 |
| 4092 | RC_AA442144_at_GI_27735034-S | EST: zw56h03.s1 Soares total fetus         | 3409.805  |
| 4093 | RC_AA056193_at_GI_37537703-A | EST: zl65e03.s1 Stratagene colon           | 3409.983  |
| 4094 | RC_AA256150_at_NA_illumina   | EST: zr79a03.s1 Soares NhHMPu S1           | 3410.136  |
| 4095 | U28413_at_NA_illumina        | Cockayne syndrome complementation          | 3410.164  |
| 4096 | HG2724-HT2820_at_NA_illumina | Oncogene Tls/Chop, Fusion Activated        | 3410.1785 |
| 4097 | Y07829_xpt3_at_GI_33469990-S | Exon A1 from H.sapiens gene encoding       | 3410.316  |
| 4098 | RC_AA253432_at_NA_illumina   | EST: zr77f04.s1 Soares NhHMPu S1           | 3410.4973 |
| 4099 | RC_AA281482_at_NA_illumina   | EST: zt03e10.s1 NCI_CGAP_GCB1 Homo         | 3410.5837 |
| 4100 | X78520_at_GI_41281845-I      | RNA for CLCN3                              | 3410.641  |
| 4101 | X81637_at_NA_illumina        | CLTB Clathrin, light polypeptide (Lcb)     | 3410.706  |
| 4102 | L15344_at_NA_illumina        | High molecular weight B cell growth factor | 3410.709  |
| 4103 | L42176_at_GI_42403584-A      | (clone 35.3) DRAL mRNA                     | 3410.758  |
| 4104 | X89416_at_GI_20127496-S      | PPP5C Protein phosphatase 5, catalytic     | 3410.7598 |
| 4105 | X73079_at_GI_31377805-S      | GIF Polymeric immunoglobulin receptor      | 3410.8743 |
| 4106 | HG759-HT759_s_at_NA_illumina | Adrenergic Receptor, Beta 1                | 3410.8982 |
| 4107 | M77016_at_GI_4507552-S       | TMOD Tropomodulin                          | 3410.9575 |
| 4108 | RC_AA431454_at_NA_illumina   | EST: zw70f01.s1 Soares testis NHT Homo     | 3411.039  |
| 4109 | U24169_at_GI_11125769-S      | JTV-1 (JTV-1) mRNA                         | 3411.071  |
| 4110 | RC_D20846_at_NA_illumina     | EST: Human HL60 3'directed MboI cDNA,      | 3411.192  |
| 4111 | RC_AA215647_at_GI_8923603-S  | EST: zr98e07.s1 NCI_CGAP_GCB1 Homo         | 3411.247  |
| 4112 | M25077_at_NA_illumina        | 60-kdal ribonucleoprotein (Ro) mRNA        | 3411.4229 |
| 4113 | X93921_at_GI_38348231-S      | Protein-tyrosine-phosphatase (tissue type: | 3411.4517 |
| 4114 | X93921_at-2_NA_illumina      | Dual specificity phosphatase 7             | 3411.4517 |
| 4115 | X76770_at_GI_32490556-S      | PAP mRNA                                   | 3411.493  |
| 4116 | D87682_at_NA_illumina        | KIAA0241 gene, partial cds                 | 3411.5442 |



|      |                               |                                          |           |
|------|-------------------------------|------------------------------------------|-----------|
| 4117 | Z83802_at_NA_illumina         | Axonemal dynein heavy chain (partial, ID | 3411.5457 |
| 4118 | M11058_at_GI_4557642-S        | 3-HYDROXY-3-METHYLGLUTARYL-              | 3411.5637 |
| 4119 | D82344_at_GI_12707579-S       | NBPhox                                   | 3411.5837 |
| 4120 | D82344_at-2_NA_illumina       | Paired mesoderm homeobox 2b              | 3411.5837 |
| 4121 | M73548_at_GI_21626462-S       | Polyposis locus (DP2.5 gene) mRNA        | 3411.6162 |
| 4122 | Y10659_at-2_NA_illumina       | Interleukin 13 receptor, alpha 1         | 3411.6863 |
| 4123 | Y10659_at_GI_26787975-S       | IL13 receptor alpha-1 chain              | 3411.6863 |
| 4124 | U40992_at_GI_24431959-S       | Heat shock protein hsp40 homolog mRNA    | 3411.8577 |
| 4125 | L14269_at_GI_42476324-S       | SLC18A2 Solute carrier family 18         | 3411.9216 |
| 4126 | RC_AA417318_at_NA_illumina    | EST: zu07b07.s1 Soares testis NHT Homo   | 3411.9382 |
| 4127 | N94199_at_NA_illumina         | EST: za27a02.r1 Homo sapiens cDNA        | 3411.9382 |
| 4128 | RC_AA236275_at_GI_22749014-S  | EST: zr54e12.s1 Soares NhHMPu S1         | 3411.9497 |
| 4129 | RC_C20545_at_NA_illumina      | EST: HUMGS0002073, Human Gene            | 3412.03   |
| 4130 | RC_AA412298_at_GI_18860830-A  | EST: zu10h04.s1 Soares testis NHT Homo   | 3412.0852 |
| 4131 | AA399299_at_GI_45439351-S     | EST: zt52e09.r1 Soares ovary tumor       | 3412.1714 |
| 4132 | U76421_at_GI_7669478-A        | DsRNA adenosine deaminase DRADA2b        | 3412.2053 |
| 4133 | RC_AA424157_at_GI_7705643-S   | EST: zv81d01.s1 Soares total fetus       | 3412.2583 |
| 4134 | RC_AA443706_s_at_NA_illumina  | EST: zw88b05.s1 Soares total fetus       | 3412.2776 |
| 4135 | RC_AA421309_at_NA_illumina    | EST: zu27f07.s1 Soares ovary tumor       | 3412.3867 |
| 4136 | S72869_at_GI_4885172-S        | H4(D10S170)                              | 3412.4595 |
| 4137 | AA099501_at_NA_illumina       | Zm17a07.r1 Stratagene pancreas           | 3412.505  |
| 4138 | M29277_s_at_NA_illumina       | CELL SURFACE GLYCOPROTEIN                | 3412.5312 |
| 4139 | RC_AA112455_at_NA_illumina    | Apoptosis specific protein               | 3412.6711 |
| 4140 | W07562_at_NA_illumina         | EST: za98h04.r1 Soares fetal lung        | 3412.74   |
| 4141 | AA393318_at_NA_illumina       | EST: zt70d02.r1 Soares testis NHT Homo   | 3412.7744 |
| 4142 | Y10260_at_GI_26667218-A       | EYA1A gene                               | 3412.9841 |
| 4143 | D45399_at_GI_5453867-S        | Cone-specific cGMP phosphodiesterase     | 3413.0156 |
| 4144 | RC_AA454144_at_NA_illumina    | Homo sapiens Chromosome 16 BAC clone     | 3413.0432 |
| 4145 | L37127_at_NA_illumina         | (clone mf.18) RNA polymerase II mRNA     | 3413.0664 |
| 4146 | RC_AA609119_at_NA_illumina    | EST: af11e03.s1 Soares testis NHT Homo   | 3413.0796 |
| 4147 | U18271_cds1_at_NA_illumina    | Thymopoietin (TMPO) gene                 | 3413.1643 |
| 4148 | D38537_s_at_GI_45439340-S     | Protoporphyrinogen oxidase               | 3413.2085 |
| 4149 | RC_AA257067_at_NA_illumina    | EST: zr82b03.s1 Soares NhHMPu S1         | 3413.2524 |
| 4150 | L36870_at_GI_24497520-S       | JNK ACTIVATING KINASE 1                  | 3413.3596 |
| 4151 | RC_AA481404_at_GI_13540585-S  | EST: zv02e12.s1 NCI_CGAP_GCB1            | 3413.417  |
| 4152 | R81003_at_NA_illumina         | EST: yi94e03.r1 Homo sapiens cDNA        | 3413.4417 |
| 4153 | V00535_rna2_s_at_GI_4504602-S | Interferon beta 1 gene extracted from    | 3413.4521 |
| 4154 | RC_AA234066_at_NA_illumina    | EST: zr74b07.s1 Soares NhHMPu S1         | 3413.4746 |
| 4155 | RC_AA417876_at_NA_illumina    | EST: zv05f04.s1 Soares NhHMPu S1         | 3413.485  |
| 4156 | D79989_at_GI_41281493-S       | KIAA0167 gene                            | 3413.4932 |
| 4157 | L20469_s_at_GI_16445399-A     | Truncated dopamine D3 receptor mRNA      | 3413.5278 |
| 4158 | W07019_at_NA_illumina         | EST: za91g05.r1 Soares fetal lung        | 3413.5686 |
| 4159 | U30998_at_GI_7706660-S        | U30998 Homo sapiens 530 melanoma         | 3413.5698 |

|      |                              |                                               |           |
|------|------------------------------|-----------------------------------------------|-----------|
| 4160 | D31263_at_GI_13375745-S      | EST: Human fetal-lung cDNA 5'-end             | 3413.6052 |
| 4161 | X82209_at_GI_4505222-S       | MN1 mRNA                                      | 3413.6384 |
| 4162 | RC_AA393808_at_NA_illumina   | EST: zv64c11.s1 Soares total fetus            | 3413.6553 |
| 4163 | M24351_cds3_s_at_NA_illumina | PTHLH gene (parathyroid hormone-like          | 3413.7983 |
| 4164 | D26561_cds2_at_NA_illumina   | ORF for E6 protein gene extracted from        | 3413.8735 |
| 4165 | M62505_at_GI_4502508-S       | C5R1 Complement component 5 receptor          | 3414.0017 |
| 4166 | U30888_at_GI_20070184-S      | TRNA-guanine transglycosylase mRNA            | 3414.0708 |
| 4167 | W26257_at_NA_illumina        | KIAA0735 gene product                         | 3414.134  |
| 4168 | W67675_at_NA_illumina        | EST: zd37c12.r1 Soares fetal heart            | 3414.2195 |
| 4169 | Z22534_at_GI_10862690-S      | SERINE/THREONINE-PROTEIN KINASE               | 3414.235  |
| 4170 | X52282_s_at_GI_45505140-S    | Atrial natriuretic peptide clearance receptor | 3414.3748 |
| 4171 | M61176_at_GI_34106709-A      | BDNF Brain-derived neurotrophic factor        | 3414.61   |
| 4172 | RC_AA411469_at_GI_25121934-A | EST: zv30h06.s1 Soares ovary tumor            | 3414.6306 |
| 4173 | D31389_at_GI_7706454-S       | Homo sapiens clone 638 unknown mRNA,          | 3414.6614 |
| 4174 | X91868_at_GI_5174680-S       | SIX1 protein                                  | 3414.6638 |
| 4175 | RC_AA447123_at_NA_illumina   | EST: zw93c01.s1 Soares total fetus            | 3414.7124 |
| 4176 | S58544_at_GI_27262637-A      | 75 kda infertility-related sperm protein      | 3414.7288 |
| 4177 | U93049_at_GI_42476117-S      | SLP-76 associated protein mRNA                | 3414.7336 |
| 4178 | RC_AA485409_at_NA_illumina   | EST: ab09g07.s1 Stratagene lung               | 3414.7373 |
| 4179 | AA423926_at_NA_illumina      | EST: zv79d10.r1 Soares total fetus            | 3415.0134 |
| 4180 | RC_AA620998_at_GI_21071059-S | EST: ag03a06.s1 Soares testis NHT Homo        | 3415.066  |
| 4181 | T99146_at_GI_20302037-S      | EST: ye62g08.r1 Homo sapiens cDNA             | 3415.0735 |
| 4182 | M73077_at_GI_25121939-A      | Glucocorticoid receptor repression factor 1   | 3415.2285 |
| 4183 | RC_AA427920_at_NA_illumina   | EST: zw53d01.s1 Soares total fetus            | 3415.2524 |
| 4184 | U74611_s_at_NA_illumina      | Tumor necrosis factor receptor                | 3415.3381 |
| 4185 | U35451_at_GI_34147635-S      | Heterochromatin protein p25 mRNA              | 3415.3508 |
| 4186 | AA325107_at_GI_13376260-S    | EST: EST28057 Cerebellum II Homo              | 3415.6304 |
| 4187 | RC_AA252603_at_GI_4502352-S  | Homo sapiens BACH1 mRNA, complete             | 3415.751  |
| 4188 | W16822_at_GI_42657580-S      | EST: zb11e01.r1 Soares fetal lung             | 3415.7546 |
| 4189 | AA480828_at_NA_illumina      | EST: zx87d05.r1 Soares ovary tumor            | 3415.873  |
| 4190 | RC_AA479148_at_GI_44662822-S | EST: zv20e10.s1 Soares NhHMPu S1              | 3415.9033 |
| 4191 | M60724_at_GI_4506736-S       | RIBOSOMAL PROTEIN S6 KINASE                   | 3415.9746 |
| 4192 | AA196354_at_NA_illumina      | EST: zp97c09.r1 Stratagene muscle             | 3416.0608 |
| 4193 | RC_AA456016_at_GI_21361719-S | EST: aa03a08.s1 Soares NhHMPu S1              | 3416.0632 |
| 4194 | AA195155_at_NA_illumina      | EST: zr35e07.r1 Soares NhHMPu S1              | 3416.0862 |
| 4195 | AA004333_at_GI_41327739-A    | EST: zh91a01.r1 Soares fetal liver spleen     | 3416.0872 |
| 4196 | S78467_s_at_NA_illumina      | PIG-A-II=glycoinositol phospholipid anchor    | 3416.1384 |
| 4197 | U53831_s_at_NA_illumina      | Homo sapiens interferon regulatory factor     | 3416.1445 |
| 4198 | U46024_at_GI_4557895-S       | MTM1 Myotubular myopathy 1                    | 3416.1536 |
| 4199 | D79997_at_GI_41281490-S      | KIAA0175 gene                                 | 3416.272  |
| 4200 | RC_AA192306_at_NA_illumina   | EST: zp97c12.s1 Stratagene muscle             | 3416.3137 |
| 4201 | Z18948_at_GI_4506762-S       | S100A3 S100 calcium-binding protein A3        | 3416.3416 |
| 4202 | U31628_at_GI_26787980-A      | IL15RA Interleukin 15 receptor alpha chain    | 3416.5342 |

|      |                                |                                              |           |
|------|--------------------------------|----------------------------------------------|-----------|
| 4203 | U77845_at_GI_40807468-S        | HTRIP (hTRIP) mRNA                           | 3416.5771 |
| 4204 | U77845_at-2_NA_illumina        | Human hTRIP (hTRIP) mRNA, complete           | 3416.5771 |
| 4205 | RC_AA001768_at_GI_13325062-S   | EST: zh84c11.s1 Soares fetal liver spleen    | 3416.6155 |
| 4206 | RC_AA432362_at_GI_42734330-S   | Homo sapiens mRNA for KIAA0678               | 3416.775  |
| 4207 | M22403_s_at_GI_45269134-S      | PLATELET GLYCOPROTEIN IB ALPHA               | 3417.0505 |
| 4208 | V00536_rna1_at_NA_illumina     | IFNG gene extracted from Human immune        | 3417.1267 |
| 4209 | X14690_s_at_GI_10092578-S      | Inter-alpha-trypsin inhibitor heavy chain H3 | 3417.143  |
| 4210 | M33374_at_GI_33519471-S        | Cell adhesion protein (SQM1) mRNA            | 3417.1926 |
| 4211 | RC_AA261858_at_NA_illumina     | EST: zs18g11.s1 NCI_CGAP_GCB1                | 3417.2307 |
| 4212 | AA203274_at_NA_illumina        | EST: zx55h09.r1 Soares fetal liver spleen    | 3417.2532 |
| 4213 | W05746_at_GI_8923531-S         | EST: za88d06.r1 Soares fetal lung            | 3417.3564 |
| 4214 | RC_AA460436_at_NA_illumina     | EST: zx66h05.s1 Soares total fetus           | 3417.387  |
| 4215 | M68840_at_GI_33469954-S        | MAOA Monoamine oxidase A                     | 3417.4534 |
| 4216 | U00928_at_NA_illumina          | RNA-BINDING PROTEIN FUS/TLS                  | 3417.4612 |
| 4217 | RC_AA449325_at_GI_34147380-S   | EST: zx06e11.s1 Soares total fetus           | 3417.4663 |
| 4218 | HG855-HT855_s_at_NA_illumina   | Dna Excision Repair Protein Ercc6            | 3417.483  |
| 4219 | X16323_at_NA_illumina          | HGF Hepatocyte growth factor                 | 3417.5369 |
| 4220 | TNFa_at_NA_illumina            | No description for gene: TNFa_at             | 3417.6348 |
| 4221 | AA095600_at_GI_28372538-S      | L5079.seq.F Fetal heart, Lambda ZAP          | 3417.6404 |
| 4222 | RC_AA448002_at_NA_illumina     | Human membrane-associated lectin type-       | 3417.6462 |
| 4223 | L07548_at_GI_4501900-S         | ACY1 Aminoacylase 1                          | 3417.6484 |
| 4224 | RC_AA039576_at_GI_29789254-A   | EST: zf07h12.s1 Soares fetal heart           | 3417.7957 |
| 4225 | RC_AA282045_at_NA_illumina     | EST: zs89a09.s1 NCI_CGAP_GCB1                | 3417.8171 |
| 4226 | W02576_at_GI_21314665-S        | EST: za05g03.r1 Soares melanocyte            | 3417.833  |
| 4227 | U51561_at_NA_illumina          | Cosmid N79E2                                 | 3417.9084 |
| 4228 | U75308_at_GI_20544140-S        | TBP-associated factor (hTAFII130) mRNA,      | 3417.9731 |
| 4229 | RC_AA427819_at_NA_illumina     | EST: zw54d12.s1 Soares total fetus           | 3418.1265 |
| 4230 | J03027_at_GI_24797072-S        | HLA-G MHC class I protein HLA-G              | 3418.14   |
| 4231 | RC_AA599107_at_GI_23618866-S   | EST: ae51h07.s1 Stratagene lung              | 3418.1648 |
| 4232 | RC_AA126458_at_NA_illumina     | EST: zn84c09.s1 Stratagene lung              | 3418.194  |
| 4233 | D86425_at_GI_33469988-S        | Osteoblast mRNA for osteonidogen             | 3418.2444 |
| 4234 | HG3729-HT3999_f_at_NA_illumina | Homeotic Protein Hpx-5                       | 3418.405  |
| 4235 | RC_AA348274_at_GI_40255204-S   | EST: EST54719 Hippocampus I Homo             | 3418.4194 |
| 4236 | U12535_at_GI_34222299-S        | Epidermal growth factor receptor kinase      | 3418.432  |
| 4237 | YEL024w/RIP1_at_NA_illumina    | No info for gene                             | 3418.4792 |
| 4238 | AB002333_at_NA_illumina        | KIAA0335 gene product                        | 3418.519  |
| 4239 | RC_AA417917_at_NA_illumina     | EST: zv94a10.s1 Soares NhHMPu S1             | 3418.5571 |
| 4240 | X75091_s_at_NA_illumina        | SET PROTEIN                                  | 3418.645  |
| 4241 | U04735_at_GI_37059762-S        | Microsomal stress 70 protein ATPase core     | 3418.6584 |
| 4242 | U64805_s_at_NA_illumina        | Brca1-delta11b (Brca1) mRNA                  | 3418.751  |
| 4243 | W19984_at_NA_illumina          | EST: zb38d11.r1 Soares parathyroid tumor     | 3418.7708 |
| 4244 | RC_AA620362_at_GI_10092658-S   | Homo sapiens chromosome 19, cosmid           | 3418.7861 |
| 4245 | AA301842_s_at_NA_illumina      | EST: EST14884 Aorta endothelial cells        | 3418.9026 |

|      |                              |                                           |           |
|------|------------------------------|-------------------------------------------|-----------|
| 4246 | RC_AA453997_at_NA_illumina   | EST: zx46a12.s1 Soares testis NHT Homo    | 3418.957  |
| 4247 | RC_AA401341_at_NA_illumina   | EST: zu62c02.s1 Soares testis NHT Homo    | 3418.9978 |
| 4248 | N48010_at_GI_7662333-A       | EST: yy23a03.r1 Homo sapiens cDNA         | 3419.0078 |
| 4249 | D63483_at_GI_33598934-A      | KIAA0149 gene                             | 3419.096  |
| 4250 | U45982_at_GI_14043043-A      | G protein-coupled receptor GPR-9-6 gene   | 3419.1216 |
| 4251 | AA412620_s_at_NA_illumina    | EST: zt97b10.r1 Soares testis NHT Homo    | 3419.2793 |
| 4252 | N36626_at_GI_34147625-S      | EST: yx88d07.r1 Homo sapiens cDNA         | 3419.3572 |
| 4253 | S67368_s_at_GI_4503864-A     | Gamma-aminobutyric acid (GABA) A          | 3419.4148 |
| 4254 | M97675_at_GI_4826867-S       | Protein tyrosine kinase t-Ror1 (Ror1)     | 3419.515  |
| 4255 | S85963_at_NA_illumina        | Insulin receptor substrate-1 [human,      | 3419.5796 |
| 4256 | X06948_at_GI_31317229-S      | FCER1A High affinity IgE receptor alpha-  | 3419.6333 |
| 4257 | T79081_at_NA_illumina        | EST: yd69c06.r1 Homo sapiens cDNA         | 3419.7336 |
| 4258 | RC_AA425770_at_NA_illumina   | EST: zw47g06.s1 Soares total fetus        | 3419.7415 |
| 4259 | RC_C14898_at_NA_illumina     | EST: Human fetal brain cDNA 3'-end GEN-   | 3419.7534 |
| 4260 | U60205_at_GI_9257238-S       | Methyl sterol oxidase (ERG25) mRNA        | 3419.9785 |
| 4261 | U65011_at_GI_18201906-S      | Preferentially expressed antigen of       | 3419.9932 |
| 4262 | AA075214_at_NA_illumina      | EST: zm86b03.r1 Stratagene ovarian        | 3420.1172 |
| 4263 | RC_AA459249_at_GI_34147413-S | EST: aa27b02.s1 NCI_CGAP_GCB1             | 3420.356  |
| 4264 | D62403_at_NA_illumina        | Human aorta cDNA 5'-end GEN-273B12,       | 3420.444  |
| 4265 | W73544_at_GI_27500527-S      | Ribosomal protein S29                     | 3420.4563 |
| 4266 | RC_AA609131_at_NA_illumina   | EST: af11f03.s1 Soares testis NHT Homo    | 3420.5273 |
| 4267 | L02950_at_GI_4503064-S       | CRYM Crystallin Mu                        | 3420.533  |
| 4268 | GMCSF_at_NA_illumina         | No description for gene: GMCSF_at         | 3420.6064 |
| 4269 | D14827_at_GI_13518226-A      | Tax helper protein 1                      | 3420.7087 |
| 4270 | RC_AA477401_at_NA_illumina   | EST: zu42a04.s1 Soares ovary tumor        | 3420.9216 |
| 4271 | U67368_s_at_GI_4557572-S     | EXT2 Exostoses (multiple) 2               | 3420.9573 |
| 4272 | D14689_at_GI_24497442-S      | NUCLEAR PORE COMPLEX PROTEIN              | 3421.0115 |
| 4273 | RC_AA424567_at_GI_12707576-A | EST: zv91f03.s1 Soares NhHMPu S1          | 3421.032  |
| 4274 | RC_AA291272_at_NA_illumina   | EST: zs18d06.s1 NCI_CGAP_GCB1             | 3421.0457 |
| 4275 | RC_AA291927_at_NA_illumina   | EST: zr58g09.s1 Soares NhHMPu S1          | 3421.1301 |
| 4276 | L12701_cds2_at_GI_7710120-S  | Engrailed protein (EN2) gene, 5' end      | 3421.1995 |
| 4277 | M55621_at_GI_6031182-S       | MGAT1 N-acetylglucosaminyltransferase I   | 3421.203  |
| 4278 | RC_AA454923_at_NA_illumina   | EST: aa30a06.s1 NCI_CGAP_GCB1             | 3421.2358 |
| 4279 | D37984_s_at_GI_14591901-A    | RECQL RecQ protein-like (DNA helicase     | 3421.287  |
| 4280 | S78234_at_GI_16554576-S      | CDC27 Cell division cycle 27              | 3421.2966 |
| 4281 | R39398_s_at_NA_illumina      | EST: yh95d06.r1 Homo sapiens cDNA         | 3421.3647 |
| 4282 | RC_AA399574_at_NA_illumina   | EST: zt88h07.s1 Soares testis NHT Homo    | 3421.38   |
| 4283 | M57732_at_GI_38016908-S      | TCF1 Transcription factor 1, hepatic; LF- | 3421.389  |
| 4284 | L08488_at_GI_4755138-S       | INPP1 Inositol polyphosphate-1-           | 3421.4316 |
| 4285 | U54804_at_GI_4885390-S       | Has2 mRNA                                 | 3421.4385 |
| 4286 | AA234657_at_NA_illumina      | Zr75g08.r1 Soares NhHMPu S1 Homo          | 3421.459  |
| 4287 | RC_AA280790_at_NA_illumina   | EST: zs97a12.s1 NCI_CGAP_GCB1             | 3421.7913 |
| 4288 | D86969_at_GI_23110985-S      | KIAA0215 gene                             | 3421.841  |

|      |                              |                                             |           |
|------|------------------------------|---------------------------------------------|-----------|
| 4289 | Z48605_at_NA_illumina        | Partial mRNA for pyrophosphatase            | 3421.9773 |
| 4290 | RC_AA476717_at_NA_illumina   | EST: zw92f09.s1 Soares total fetus          | 3421.9854 |
| 4291 | RC_AA037377_at_GI_18105001-A | EST: zk36c03.s1 Soares pregnant uterus      | 3422.1704 |
| 4292 | RC_AA350268_at_GI_34330190-S | EST: EST57664 Infant brain Homo             | 3422.255  |
| 4293 | AA504307_at_NA_illumina      | Alpha thalassemia/mental retardation        | 3422.26   |
| 4294 | U58970_at_GI_40807467-S      | Putative outer mitochondrial membrane 34    | 3422.3418 |
| 4295 | X66610_at_NA_illumina        | ALPHA ENOLASE, LUNG SPECIFIC                | 3422.388  |
| 4296 | AA428945_at_NA_illumina      | EST: zv77c09.r1 Soares total fetus          | 3422.3884 |
| 4297 | M91389_at_GI_45439366-S      | Homo sapiens connexin46.6 (Cx46.6)          | 3422.4365 |
| 4298 | L04751_at_NA_illumina        | CYP4A11 Cytochrome P450, subfamily          | 3422.5286 |
| 4299 | U78556_at_NA_illumina        | Cisplatin resistance associated alpha       | 3422.6682 |
| 4300 | X58377_at_GI_24430217-S      | Adipogenesis inhibitory factor              | 3422.741  |
| 4301 | RC_D51215_f_at_NA_illumina   | STATHMIN                                    | 3422.8367 |
| 4302 | AA329542_at_NA_illumina      | EST: EST33182 Embryo, 12 week II Homo       | 3423.0208 |
| 4303 | RC_AA262556_at_GI_8923762-S  | EST: zs22b09.s1 NCI_CGAP_GCB1               | 3423.132  |
| 4304 | W68649_at_NA_illumina        | EST: zd36f09.r1 Soares fetal heart          | 3423.2183 |
| 4305 | M19989_cds2_at_GI_15208655-A | Platelet-derived growth factor (PDGFA) A    | 3423.221  |
| 4306 | RC_AA136532_at_GI_41529827-S | EST: zk99d01.s1 Soares pregnant uterus      | 3423.2695 |
| 4307 | HG742-HT742_at_NA_illumina   | Latent Membrane Protein Lmp1                | 3423.321  |
| 4308 | RC_AA282196_at_NA_illumina   | Homo sapiens PKY protein kinase mRNA,       | 3423.3337 |
| 4309 | D29675_at_GI_24041031-A      | Inducible nitric oxide synthase gene,       | 3423.3918 |
| 4310 | U64863_at_GI_4826889-S       | HPD-1 (hPD-1) mRNA                          | 3423.4119 |
| 4311 | X52332_at_NA_illumina        | Homo sapiens mRNA for zinc finger           | 3423.5671 |
| 4312 | AA443479_at_NA_illumina      | Nuclear restricted protein, BTB domain-like | 3423.591  |
| 4313 | RC_AA044664_at_NA_illumina   | EST: zk72h11.s1 Soares pregnant uterus      | 3423.6191 |
| 4314 | R87549_at_NA_illumina        | Ym89c04.r1 Homo sapiens cDNA clone          | 3423.6938 |
| 4315 | W28462_at_NA_illumina        | Secreted protein, acidic, cysteine-rich     | 3423.7883 |
| 4316 | R59309_at_NA_illumina        | Homo sapiens KIAA0431 mRNA, partial         | 3423.9297 |
| 4317 | L78267_at_NA_illumina        | PAR5 gene, complete sequence                | 3424.0237 |
| 4318 | U57877_at_GI_9257243-S       | Integral membrane protein CII-3 mRNA,       | 3424.0786 |
| 4319 | AA179892_at_GI_34222354-S    | EST: zp14c07.r1 Stratogene fetal retina     | 3424.1228 |
| 4320 | H72611_at_GI_41152077-S      | EST: yu02f10.r1 Homo sapiens cDNA           | 3424.3972 |
| 4321 | M77144_rna1_at_GI_4504508-S  | 3-beta-hydroxysteroid dehydrogenase         | 3424.4036 |
| 4322 | W24707_at_GI_29731964-S      | Homo sapiens mRNA for KIAA0804              | 3424.421  |
| 4323 | U65437_rna1_at_GI_4504366-S  | Homeodomain-containing protein (HANF)       | 3424.4946 |
| 4324 | U65437_rna1_at-2_NA_illumina | Homeo box gene expressed in ES cells;       | 3424.4946 |
| 4325 | RC_AA046747_at_GI_40549450-S | EST: zf12d09.s1 Soares fetal heart          | 3424.6553 |
| 4326 | Z29067_at_GI_23510392-A      | Nek3 mRNA for protein kinase                | 3424.685  |
| 4327 | H47269_at_NA_illumina        | Splicing factor, arginine/serine-rich 7     | 3424.795  |
| 4328 | U13695_at_GI_11496979-S      | Homolog of yeast mutL (hPMS1) gene          | 3424.799  |
| 4329 | U13695_at-2_NA_illumina      | Postmeiotic segregation increased (S.       | 3424.799  |
| 4330 | AF000234_at_GI_28416928-A    | P2x purinoceptor mRNA                       | 3424.854  |
| 4331 | X59710_at_GI_45597173-S      | CAAT-box DNA binding protein subunit B      | 3424.8542 |

|      |                              |                                             |           |
|------|------------------------------|---------------------------------------------|-----------|
| 4332 | X59710_at-2_NA_illumina      | CCAAT-BINDING TRANSCRIPTION                 | 3424.8542 |
| 4333 | HG3502-HT3696_at_NA_illumina | Homeotic Protein Hox5.4                     | 3424.86   |
| 4334 | AA129196_at_NA_illumina      | Zn29d08.r1 Stratagene neuroepithelium       | 3424.8645 |
| 4335 | S81957_at_NA_illumina        | BMP-5=bone morphogenic protein-5            | 3425.034  |
| 4336 | RC_AA460310_at_GI_41188450-S | EST: zx51d03.s1 Soares testis NHT Homo      | 3425.0488 |
| 4337 | U39817_at_GI_4557364-S       | BLM Bloom syndrome                          | 3425.1243 |
| 4338 | AA252752_at_NA_illumina      | EST: zs26b10.r1 NCI_CGAP_GCB1 Homo          | 3425.172  |
| 4339 | U62647_at_GI_41393584-S      | Deoxyribonuclease I-like 2                  | 3425.3484 |
| 4340 | AA232121_r_at_NA_illumina    | Tyrosyl-tRNA synthetase                     | 3425.355  |
| 4341 | RC_AA034111_at_NA_illumina   | EST: zi06d10.s1 Soares fetal liver spleen   | 3425.3564 |
| 4342 | U12775_at_GI_21327679-S      | AGOUTI SWITCH PROTEIN                       | 3425.415  |
| 4343 | X95191_at_NA_illumina        | Delta-sarcoglycan                           | 3425.628  |
| 4344 | U53468_at_GI_13699821-S      | NADH:ubiquinone oxidoreductase subunit      | 3425.6853 |
| 4345 | HG180-HT180_at_NA_illumina   | Ahnak-A Nucleoprotein Ahnak-A               | 3425.7163 |
| 4346 | L10377_s_at_NA_illumina      | (clone CTG-B37) mRNA sequence               | 3425.8914 |
| 4347 | D87458_at_GI_29543554-A      | KIAA0282 gene, partial cds                  | 3425.9167 |
| 4348 | U41804_at_NA_illumina        | Putative T1/ST2 receptor binding protein    | 3425.9402 |
| 4349 | M87507_s_at_GI_15431333-A    | IL1BC Interleukin 1, beta, convertase       | 3425.9636 |
| 4350 | AA121078_at_NA_illumina      | Zm22b08.r1 Stratagene pancreas              | 3426.0386 |
| 4351 | RC_AA282803_at_NA_illumina   | EST: zs91d09.s1 NCI_CGAP_GCB1               | 3426.1167 |
| 4352 | RC_AA197278_at_NA_illumina   | Ribosomal protein L14                       | 3426.136  |
| 4353 | AA459160_at_NA_illumina      | EST: aa26h10.r1 NCI_CGAP_GCB1               | 3426.172  |
| 4354 | RC_AA447718_at_NA_illumina   | EST: aa20c10.s1 Soares NhHMPu S1            | 3426.2292 |
| 4355 | D49950_at-2_NA_illumina      | Interleukin 18 (interferon-gamma-inducing   | 3426.2507 |
| 4356 | D49950_at_GI_27502389-S      | Liver mRNA for interferon-gamma inducing    | 3426.2507 |
| 4357 | S79781_at_GI_13386511-A      | WT1 {antisense promoter, intron 1}          | 3426.3982 |
| 4358 | RC_AA426062_at_NA_illumina   | EST: zv52a03.s1 Soares testis NHT Homo      | 3426.4475 |
| 4359 | M95623_cds1_at_GI_20149499-S | PBGD gene (hydroxymethylbilane              | 3426.5247 |
| 4360 | RC_AA021502_at_NA_illumina   | EST: ze66b09.s1 Soares retina N2b4HR        | 3426.526  |
| 4361 | M24736_s_at_GI_4506870-S     | SELE Selectin E (endothelial adhesion       | 3426.5427 |
| 4362 | RC_AA489620_at_NA_illumina   | KIAA0764 gene product                       | 3426.5535 |
| 4363 | W28097_at_NA_illumina        | EST: 42a10 Human retina cDNA randomly       | 3426.695  |
| 4364 | W52493_at_NA_illumina        | EST: zc54a05.r1 Soares senescent            | 3426.7756 |
| 4365 | D31784_at_GI_15011911-S      | Cadherin-6                                  | 3426.7793 |
| 4366 | RC_AA609650_s_at_NA_illumina | EST: af16b03.s1 Soares testis NHT Homo      | 3426.8708 |
| 4367 | RC_AA458652_at_NA_illumina   | EST: aa16c09.s1 Soares NhHMPu S1            | 3426.8938 |
| 4368 | L02932_at_GI_7549810-S       | PPARA Peroxisome proliferative activated    | 3426.9138 |
| 4369 | AA504439_at_GI_21281678-S    | EST: aa59g12.r1 NCI_CGAP_GCB1               | 3426.9246 |
| 4370 | H58762_at_NA_illumina        | EST: EST00057 Homo sapiens cDNA             | 3427.1116 |
| 4371 | X03350_at_GI_34577060-S      | ADH2 Alcohol dehydrogenase 2 (class I),     | 3427.2927 |
| 4372 | W73805_at_NA_illumina        | EST: zd50g02.r1 Soares fetal heart          | 3427.3535 |
| 4373 | RC_AA063428_s_at_NA_illumina | Neuronal adaptin-like protein, beta-subunit | 3427.3875 |
| 4374 | RC_AA404241_at_GI_13259542-A | EST: zv63c01.s1 Soares total fetus          | 3427.3909 |

|      |                                |                                            |           |
|------|--------------------------------|--------------------------------------------|-----------|
| 4375 | X98307_at_NA_illumina          | UV-B repressed sequence, HUR 7             | 3427.5027 |
| 4376 | X98307_at-2_NA_illumina        | H.sapiens mRNA for UV-B repressed          | 3427.5027 |
| 4377 | L41607_at_GI_30061505-A        | GCNT2 Glucosaminyl (N-acetyl)              | 3427.5198 |
| 4378 | RC_AA242823_at_GI_31543399-S   | EST: zr65e10.s1 Soares NhHMPu S1           | 3427.6353 |
| 4379 | D81809_at_NA_illumina          | Human Src-like adapter protein mRNA,       | 3427.6763 |
| 4380 | RC_AA343514_at_NA_illumina     | EST: EST49299 Gall bladder I Homo          | 3427.6907 |
| 4381 | M77140_at_GI_27804312-S        | GALN Galanin                               | 3427.7573 |
| 4382 | HG3636-HT3846_at_NA_illumina   | Myosin, Heavy Polypeptide 9, Non-Muscle    | 3427.82   |
| 4383 | RC_AA447516_at_NA_illumina     | EST: zw81a08.s1 Soares testis NHT          | 3427.8418 |
| 4384 | M83664_at_NA_illumina          | HLA-DPB1 Major histocompatibility          | 3427.9539 |
| 4385 | R70086_at_NA_illumina          | Inhibitor of growth 1-like                 | 3427.9763 |
| 4386 | M37763_at_GI_45359869-S        | Neurotrophin-3 (NT-3) gene                 | 3428.0452 |
| 4387 | R29077_at_NA_illumina          | EST: F1-110D 22 week old human fetal       | 3428.0698 |
| 4388 | L49054_at_GI_33636694-S        | T(3;5)(q25.1;p34) fusion gene NPM-MLF1     | 3428.1526 |
| 4389 | AA187045_at_NA_illumina        | EST: zp58a07.r1 Stratagene endothelial     | 3428.2463 |
| 4390 | U27193_at_GI_4758211-S         | Protein-tyrosine phosphatase mRNA          | 3428.2463 |
| 4391 | L13943_at_GI_42794761-S        | GK Glycerol kinase                         | 3428.266  |
| 4392 | HG2383-HT4824_s_at_NA_illumina | Cystathionine Beta Synthase, Alt. Splice 3 | 3428.3713 |
| 4393 | RC_AA285161_at_NA_illumina     | Solute carrier family 16 (monocarboxylic   | 3428.3992 |
| 4394 | U79271_at_GI_32307162-A        | Clones 23920 and 23921 mRNA sequence       | 3428.4326 |
| 4395 | Z68274_at_NA_illumina          | DNA sequence from cosmid L129H7,           | 3428.5942 |
| 4396 | L25270_at_NA_illumina          | XE169 PROTEIN                              | 3428.6748 |
| 4397 | X04297_at_NA_illumina          | RPS13 RNA polymerase II polypeptide B      | 3428.7498 |
| 4398 | HG3248-HT3425_at_NA_illumina   | Fibroblast Growth Factor, Antisense Mrna   | 3428.7734 |
| 4399 | M61916_at_GI_4504950-S         | LAMB1 Laminin B1 chain                     | 3428.7898 |
| 4400 | U18244_at_GI_4827011-S         | Excitatory amino acid transporter 4 mRNA   | 3428.8176 |
| 4401 | C16161_s_at_GI_27502428-S      | EST: Human aorta cDNA 5'-end GEN-          | 3428.826  |
| 4402 | AA314256_at_NA_illumina        | EST: EST186101 Colon carcinoma (HCC)       | 3428.9934 |
| 4403 | RC_AA058846_at_NA_illumina     | EST: zf64c05.s1 Soares retina N2b4HR       | 3429.0193 |
| 4404 | AA452000_at_GI_19424129-S      | EST: zv75d06.r1 Soares total fetus         | 3429.069  |
| 4405 | RC_AA256668_at_GI_22907022-S   | EST: zr82h02.s1 Soares NhHMPu S1           | 3429.322  |
| 4406 | U90911_at_GI_23199980-S        | Clone 23652 mRNA sequence                  | 3429.4338 |
| 4407 | AA477274_s_at_GI_21389338-S    | EST: zu43d11.r1 Soares ovary tumor         | 3429.7585 |
| 4408 | AA170806_at_NA_illumina        | EST: ATH322 HTCDL1 Homo sapiens            | 3429.8088 |
| 4409 | X95826_at_GI_12711661-S        | ART4 gene                                  | 3429.8484 |
| 4410 | AA283662_at_NA_illumina        | EST: zt16h03.r1 NCI_CGAP_GCB1 Homo         | 3429.8728 |
| 4411 | R77382_at_NA_illumina          | EST: yi75d09.r1 Homo sapiens cDNA          | 3430.0496 |
| 4412 | RC_AA478954_at_NA_illumina     | EST: zv18c03.s1 Soares NhHMPu S1           | 3430.1304 |
| 4413 | M61853_at_GI_13699815-S        | CYP2C18 Cytochrome P450, subfamily IIC     | 3430.1345 |
| 4414 | L37347_at_GI_10835168-S        | NRAMP2 Natural resistance-associated       | 3430.213  |
| 4415 | AA249022_at_NA_illumina        | EST: I5926.seq.F Human fetal heart,        | 3430.243  |
| 4416 | AA418214_at_GI_8922226-S       | EST: zv97f07.r1 Soares NhHMPu S1           | 3430.3196 |
| 4417 | AF009426_at_GI_4757883-S       | Clone 22 mRNA, alternative splice variant  | 3430.32   |

|      |                                |                                            |           |
|------|--------------------------------|--------------------------------------------|-----------|
| 4418 | U03735_f_at_GI_29029622-S      | MAGE-3 antigen (MAGE-3) gene               | 3430.321  |
| 4419 | RC_AA195050_at_GI_39930590-S   | EST: zr34d01.s1 Soares NhHMPu S1           | 3430.3513 |
| 4420 | N71503_s_at_NA_illumina        | EST: yw32b10.r1 Homo sapiens cDNA          | 3430.3752 |
| 4421 | AA034011_at_NA_illumina        | EST: zi06c10.r1 Soares fetal liver spleen  | 3430.4106 |
| 4422 | H68018_s_at_NA_illumina        | EST: yr76h05.r1 Homo sapiens cDNA          | 3430.4595 |
| 4423 | RC_AA299655_at_NA_illumina     | EST: EST12479 Uterus tumor I Homo          | 3430.479  |
| 4424 | W28255_at_NA_illumina          | EST: 44b8 Human retina cDNA randomly       | 3430.6025 |
| 4425 | X56465_at_GI_15451942-S        | Znf6 mRNA for zinc finger transcription    | 3430.6062 |
| 4426 | L13258_at_GI_31543634-S        | SLC17A2 Solute carrier family 17 (sodium   | 3430.6694 |
| 4427 | X65977_at_GI_4503302-S         | DEFA4 Defensin, alpha 4, corticostatin     | 3430.9236 |
| 4428 | RC_AA004622_at_GI_31563536-S   | EST: zh87b06.s1 Soares fetal liver spleen  | 3430.9573 |
| 4429 | X96753_at_GI_21536290-S        | Melanoma-associated chondroitin sulfate    | 3431.029  |
| 4430 | HG2255-HT2344_f_at_NA_illumina | Phosphoribosyl Pyrophosphate               | 3431.0688 |
| 4431 | U13044_at_GI_34452720-S        | GABPA GA-binding protein transcription     | 3431.1145 |
| 4432 | M60503_at_NA_illumina          | Profilaggrin gene, 3' end                  | 3431.1875 |
| 4433 | C06279_at_GI_40255081-S        | EST: similar to none, mRNA sequence.       | 3431.2197 |
| 4434 | U29943_s_at_GI_4758261-S       | ELAV-like neuronal protein-2 Hel-N2        | 3431.2468 |
| 4435 | Z83745_at_NA_illumina          | DNA sequence from PAC 453A3 contains       | 3431.323  |
| 4436 | RC_AA227953_at_NA_illumina     | EST: zr56b07.s1 Soares NhHMPu S1           | 3431.3403 |
| 4437 | U86214_at_NA_illumina          | Fas-associated death domain protein        | 3431.3586 |
| 4438 | M26958_s_at_NA_illumina        | Parathyroid hormone-related protein        | 3431.4958 |
| 4439 | RC_AA233451_at_NA_illumina     | Transcriptional intermediary factor 1      | 3431.4983 |
| 4440 | RC_AA397921_at_NA_illumina     | Homo sapiens mRNA; transcriptional unit    | 3431.612  |
| 4441 | U03399_at_GI_4759221-S         | T-complex protein 10A (TCP10A) mRNA        | 3431.6204 |
| 4442 | F15201_at_GI_13162284-S        | EST: H. sapiens partial cDNA sequence,     | 3431.6313 |
| 4443 | AA044946_at_NA_illumina        | Transcription factor 9 (binds GC-rich      | 3431.6638 |
| 4444 | X00695_s_at_NA_illumina        | INTERLEUKIN-2 PRECURSOR                    | 3431.6658 |
| 4445 | AA479132_at_GI_22748614-S      | EST: zv20c09.r1 Soares NhHMPu S1           | 3431.6968 |
| 4446 | AA455318_at_GI_7019552-S       | EST: aa30b07.r1 NCI_CGAP_GCB1              | 3431.7026 |
| 4447 | RC_AA018453_at_NA_illumina     | EST: ze50c06.s1 Soares retina N2b4HR       | 3431.8298 |
| 4448 | RC_AA233459_at_GI_8923268-S    | EST: zr30c03.s1 Stratagene NT2 neuronal    | 3431.8389 |
| 4449 | U70862_at_GI_5031940-S         | Nuclear factor I B3 mRNA                   | 3431.863  |
| 4450 | RC_AA402814_at_NA_illumina     | EST: zu56g05.s1 Soares ovary tumor         | 3431.9346 |
| 4451 | D38122_at_NA_illumina          | FAS ANTIGEN LIGAND                         | 3432.0742 |
| 4452 | U61262_at_GI_4505374-S         | NEO1 Neogenin (chicken) homolog 1          | 3432.2275 |
| 4453 | S52028_s_at_GI_34328938-A      | CTH Cystathionase (cystathionine gamma-    | 3432.3718 |
| 4454 | AA429793_at_NA_illumina        | EST: zw57d06.r1 Soares total fetus         | 3432.4038 |
| 4455 | RC_AA243768_at_NA_illumina     | Homo sapiens PAC clone DJ130H16 from       | 3432.554  |
| 4456 | RC_AA497016_at_NA_illumina     | EST: ae32g06.s1 Gessler Wilms tumor        | 3432.6062 |
| 4457 | X78931_s_at_GI_42734299-S      | H.sapiens HZF8 mRNA for zinc finger        | 3432.68   |
| 4458 | U79526_at_GI_4758013-S         | Orphan G-protein coupled receptor Dez      | 3432.6929 |
| 4459 | U42359_at_GI_30410789-A        | N33 protein form 1 (N33) gene, exon 10     | 3432.697  |
| 4460 | U26424_at_GI_5454093-S         | Stress responsive serine/threonine protein | 3432.8728 |



|      |                                |                                          |           |
|------|--------------------------------|------------------------------------------|-----------|
| 4461 | Y09858_at-2_NA_illumina        | H.sapiens mRNA for unknown protein.      | 3432.933  |
| 4462 | Y09858_at_GI_9506850-S         | Unknown protein                          | 3432.933  |
| 4463 | AB002320_at_NA_illumina        | Human mRNA for KIAA0322 gene, partial    | 3432.9333 |
| 4464 | U94747_at_NA_illumina          | WD repeat protein HAN11 mRNA             | 3432.9507 |
| 4465 | M29551_at_NA_illumina          | SERINE/THREONINE PROTEIN                 | 3432.971  |
| 4466 | M62840_at_GI_4502114-S         | AOAH Acyloxyacyl hydrolase (neutrophil)  | 3432.984  |
| 4467 | U07804_s_at_GI_19913404-S      | TOP1 DNA topoisomerase I                 | 3433.1238 |
| 4468 | M55418_at_GI_33356557-A        | Amelogenin (AMELX) gene, 3' end of cds   | 3433.1638 |
| 4469 | AA082171_at_NA_illumina        | EST: zn42g07.r1 Stratagene endothelial   | 3433.1692 |
| 4470 | RC_AA599814_at_GI_40255107-S   | EST: ag32b09.s1 Jia bone marrow stroma   | 3433.219  |
| 4471 | RC_AA464279_at_NA_illumina     | Homo sapiens clone 24751 unknown         | 3433.355  |
| 4472 | RC_AA496788_at_NA_illumina     | Homo sapiens mRNA for KIAA0532           | 3433.4546 |
| 4473 | X02958_at_NA_illumina          | Interferon alpha gene IFN-alpha 6        | 3433.609  |
| 4474 | W67631_at_NA_illumina          | Homo sapiens clone 24538 mRNA            | 3433.6267 |
| 4475 | Y09980_rna4_at_NA_illumina     | HOXD3 gene                               | 3433.6394 |
| 4476 | RC_AA429571_at_GI_34147342-S   | EST: zw75d12.s1 Soares testis NHT        | 3433.678  |
| 4477 | RC_AA024518_i_at_NA_illumina   | EST: ze73c11.s1 Soares fetal heart       | 3433.6855 |
| 4478 | RC_D25984_at_NA_illumina       | EST: Human colon 3'directed Mbol cDNA,   | 3433.7478 |
| 4479 | RC_AA481877_at_NA_illumina     | EST: zv41f12.s1 Soares ovary tumor       | 3433.7808 |
| 4480 | X97303_at_NA_illumina          | Ptg-12 protein                           | 3433.9043 |
| 4481 | RC_AA258068_at_GI_5803220-S    | EST: zs76d12.s1 NCI_CGAP_GCB1            | 3433.9165 |
| 4482 | W87356_at_NA_illumina          | RAD52 (S. cerevisiae) homolog            | 3433.9526 |
| 4483 | M68907_s_at_GI_7770078-A       | Tachykinin-A (gamma-PPT-A) gene, partial | 3433.9688 |
| 4484 | M13207_at_GI_27437029-S        | CSF2 Colony-stimulating factor 2 (GM-    | 3434.0442 |
| 4485 | D17400_at_GI_4506330-S         | PTS 6-pyruvoyltetrahydropterin synthase  | 3434.1157 |
| 4486 | D57538_s_at_GI_42476319-S      | EST: Human aorta cDNA 5'-end GEN-        | 3434.157  |
| 4487 | U53442_at_GI_20986525-A        | P38Beta MAP kinase mRNA                  | 3434.2034 |
| 4488 | U08998_at_GI_19743837-A        | TAR RNA binding protein (TRBP) mRNA      | 3434.2185 |
| 4489 | D82636_at_GI_17978499-A        | EST: similar to none, mRNA sequence.     | 3434.245  |
| 4490 | RC_AA620446_at_GI_4759029-S    | RecQ protein-like 4                      | 3434.28   |
| 4491 | W28045_at_NA_illumina          | EST: 41b8 Human retina cDNA randomly     | 3434.3533 |
| 4492 | AD000684_cds1_at_GI_45505162-A | LISCH7 gene (liver-specific bHLH-Zip     | 3434.3638 |
| 4493 | RC_AA455078_at_GI_40255004-S   | EST: aa04d11.s1 Soares NhHMPu S1         | 3434.464  |
| 4494 | RC_AA621751_at_GI_23097271-S   | EST: af06c06.s1 Soares testis NHT Homo   | 3434.5938 |
| 4495 | RC_AA166838_at_NA_illumina     | EST: zq39h04.s1 Stratagene hNT neuron    | 3434.5957 |
| 4496 | L34409_at_NA_illumina          | (clone B3B3E13) chromosome 4p16.3        | 3434.7026 |
| 4497 | AA096014_at_NA_illumina        | EST: I7117.seq.F Fetal heart, Lambda     | 3434.7117 |
| 4498 | W00433_at_NA_illumina          | Homo sapiens mRNA from chromosome        | 3434.732  |
| 4499 | AA166938_at_NA_illumina        | EST: zo87c04.r1 Stratagene ovarian       | 3434.7893 |
| 4500 | AA155958_at_NA_illumina        | EST: zo49d02.r1 Stratagene endothelial   | 3434.907  |
| 4501 | U82532_at_GI_4502224-S         | GDI-dissociation inhibitor RhoGDIgamma   | 3434.9136 |
| 4502 | J00220_cds5_at_NA_illumina     | IGHA1 gene extracted from Human Ig       | 3435.0127 |
| 4503 | D88795_at_GI_14195592-S        | Cadherin, partial cds                    | 3435.0142 |

|      |                              |                                             |           |
|------|------------------------------|---------------------------------------------|-----------|
| 4504 | U73191_at_GI_25777639-A      | Inward rectifier potassium channel (Kir1.3) | 3435.0632 |
| 4505 | RC_AA029757_at_GI_10864026-S | EST: zk08c03.s1 Soares pregnant uterus      | 3435.1099 |
| 4506 | X66362_at_GI_38505200-S      | PCTK3 PCTAIRE protein kinase 3              | 3435.1204 |
| 4507 | AA424897_s_at_NA_illumina    | EST: zv47b09.r1 Soares ovary tumor          | 3435.1326 |
| 4508 | U60669_rna1_s_at_NA_illumina | Human 1 alpha,25-dihydroxyvitamin D3 24-    | 3435.135  |
| 4509 | AA292385_at_GI_31377655-S    | EST: zt51b10.r1 Soares ovary tumor          | 3435.1443 |
| 4510 | AA286694_s_at_GI_7662309-S   | EST: zs48h06.r1 NCI_CGAP_GCB1 Homo          | 3435.1604 |
| 4511 | RC_AA454725_at_NA_illumina   | Homo sapiens mRNA from chromosome           | 3435.1887 |
| 4512 | U47292_at_GI_38488723-S      | Spasmolytic polypeptide (SP) gene, 5'       | 3435.1985 |
| 4513 | RC_AA416742_at_NA_illumina   | EST: zu09g03.s1 Soares testis NHT Homo      | 3435.3054 |
| 4514 | U07969_s_at_GI_16507959-S    | Intestinal peptide-associated transporter   | 3435.357  |
| 4515 | R81768_at_NA_illumina        | Homo sapiens mRNA for KIAA0890              | 3435.3984 |
| 4516 | AA247966_at_NA_illumina      | EST: k1064.seq.F Human fetal heart,         | 3435.4285 |
| 4517 | AA206983_at_NA_illumina      | EST: zq50h02.r1 Stratagene                  | 3435.5151 |
| 4518 | U42360_cds2_at_NA_illumina   | N33 gene                                    | 3435.6355 |
| 4519 | X60484_at_NA_illumina        | H4/e gene for H4 histone                    | 3435.6506 |
| 4520 | D12676_at_GI_33598925-S      | Lysosomal sialoglycoprotein                 | 3435.6653 |
| 4521 | X79440_at_GI_5729919-S       | NADP+-dependent malic enzyme                | 3435.7842 |
| 4522 | K02766_at_GI_31542289-S      | C9 Complement component C9                  | 3435.8333 |
| 4523 | R86231_at_NA_illumina        | EST: yp88c09.r1 Homo sapiens cDNA           | 3435.9814 |
| 4524 | RC_AA504145_at_NA_illumina   | Human Chromosome 16 BAC clone               | 3436.1619 |
| 4525 | U83411_at_GI_4503024-S       | Carboxypeptidase Z precursor, mRNA          | 3436.2412 |
| 4526 | RC_AA461551_at_GI_21314666-S | EST: zx62b11.s1 Soares total fetus          | 3436.2856 |
| 4527 | W73104_at_NA_illumina        | EST: zd01d03.r1 Pancreatic Islet Homo       | 3436.3027 |
| 4528 | RC_AA406104_at_NA_illumina   | EST: zu20a06.s1 Soares NhHMPu S1            | 3436.32   |
| 4529 | U57796_at_GI_5454177-S       | Zinc finger protein (LD5-1) mRNA            | 3436.384  |
| 4530 | RC_AA258203_at_NA_illumina   | EST: zs35g04.s1 NCI_CGAP_GCB1               | 3436.394  |
| 4531 | W02818_s_at_NA_illumina      | EST: za05g06.r1 Soares melanocyte           | 3436.4622 |
| 4532 | RC_AA293426_at_NA_illumina   | EST: zt54b07.s1 Soares ovary tumor          | 3436.469  |
| 4533 | D87440_at_NA_illumina        | KIAA0252 gene, partial cds                  | 3436.512  |
| 4534 | AA481218_at_NA_illumina      | EST: aa34e09.r1 NCI_CGAP_GCB1               | 3436.524  |
| 4535 | AA216562_at_NA_illumina      | Neuroblastoma RAS viral (v-ras) oncogene    | 3436.5522 |
| 4536 | U97502_rna1_at_NA_illumina   | Butyrophilin (BT3.3) gene                   | 3436.7146 |
| 4537 | U33849_at_GI_20336247-S      | Lymphoma proprotein convertase (LPC)        | 3436.7507 |
| 4538 | H89896_s_at_NA_illumina      | EST: yw29e12.r1 Homo sapiens cDNA           | 3437.024  |
| 4539 | RC_AA465664_at_NA_illumina   | EST: aa31b10.s1 NCI_CGAP_GCB1               | 3437.0251 |
| 4540 | N48927_at_GI_13470085-S      | EST: yy75e09.r1 Homo sapiens cDNA           | 3437.0388 |
| 4541 | L05628_s_at_GI_9955953-A     | MULTIDRUG RESISTANCE-                       | 3437.1262 |
| 4542 | RC_AA495924_at_NA_illumina   | EST: zw05g12.s1 Soares NhHMPu S1            | 3437.1394 |
| 4543 | W26652_at_GI_14165271-S      | EST: 34c6 Human retina cDNA randomly        | 3437.1445 |
| 4544 | J03263_s_at_GI_7669500-S     | LAMP1 Lysosome-associated membrane          | 3437.2554 |
| 4545 | U73304_rna1_at_GI_15208647-A | CB1 cannabinoid receptor (CNR1) gene        | 3437.2615 |
| 4546 | RC_AA043196_at_NA_illumina   | SMC (mouse) homolog, X chromosome           | 3437.2673 |

|      |                              |                                            |           |
|------|------------------------------|--------------------------------------------|-----------|
| 4547 | R26030_at_NA_illumina        | EST: yh45d12.r1 Homo sapiens cDNA          | 3437.2976 |
| 4548 | L04270_at_GI_4505038-S       | LYMPHOTOXIN-BETA RECEPTOR                  | 3437.3591 |
| 4549 | AA236286_at_NA_illumina      | EST: zr51a03.r1 Soares NhHMPu S1           | 3437.4019 |
| 4550 | AA085789_at_NA_illumina      | Human Tat-SF1 mRNA, complete cds           | 3437.4802 |
| 4551 | S82240_at_NA_illumina        | RhoE                                       | 3437.5308 |
| 4552 | U66669_at_GI_37594468-A      | 3-hydroxyisobutyryl-coenzyme A hydrolase   | 3437.5378 |
| 4553 | RC_AA236747_at_GI_21237764-A | Mitogen-activated protein kinase-activated | 3437.6501 |
| 4554 | Z11737_at-2_NA_illumina      | Flavin containing monooxygenase 4          | 3437.6782 |
| 4555 | Z11737_at_GI_4503758-S       | FMO4 Flavin-containing monooxygenase 4     | 3437.6782 |
| 4556 | RC_AA427577_at_NA_illumina   | EST: zw54b05.s1 Soares total fetus         | 3437.679  |
| 4557 | U53003_at_NA_illumina        | KNP-Ia                                     | 3437.7026 |
| 4558 | X80507_at_GI_20986484-S      | 65 KD YES-ASSOCIATED PROTEIN               | 3437.8281 |
| 4559 | X80507_at-2_NA_illumina      | 65 KD YES-ASSOCIATED PROTEIN               | 3437.8281 |
| 4560 | RC_AA449741_at_NA_illumina   | Homo sapiens GAS41 protein mRNA,           | 3437.882  |
| 4561 | Y10518_at_NA_illumina        | CD202 protein                              | 3437.8982 |
| 4562 | L44338_at_NA_illumina        | Calpastatin                                | 3437.96   |
| 4563 | AA019943_at_NA_illumina      | EST: ze63a07.r1 Soares retina N2b4HR       | 3438.077  |
| 4564 | W28091_at_NA_illumina        | EST: 41h4 Human retina cDNA randomly       | 3438.0776 |
| 4565 | M14091_at_GI_24475625-S      | THYROXINE-BINDING GLOBULIN                 | 3438.1626 |
| 4566 | U78313_at_GI_13027633-S      | Myogenic repressor I-mf (MDFI) mRNA        | 3438.236  |
| 4567 | D26018_at_GI_38492355-S      | KIAA0039 gene, partial cds                 | 3438.2825 |
| 4568 | AA209290_at_NA_illumina      | EST: zq85c01.r1 Stratagene hNT neuron      | 3438.284  |
| 4569 | D50810_at_GI_5031880-S       | Placental leucine aminopeptidase           | 3438.3225 |
| 4570 | M64936_f_at_NA_illumina      | Homo sapiens retinoic acid-inducible       | 3438.3577 |
| 4571 | AA215336_at_GI_23111058-S    | EST: zr94d10.r1 NCI_CGAP_GCB1 Homo         | 3438.3708 |
| 4572 | U25433_at_NA_illumina        | Protein associated with tumorigenic        | 3438.3882 |
| 4573 | Y10032_at_GI_25168262-S      | Putative serine/threonine protein kinase   | 3438.4495 |
| 4574 | H02425_at_NA_illumina        | Yj40f04.r1 Homo sapiens cDNA clone         | 3438.5835 |
| 4575 | RC_AA428286_at_NA_illumina   | EST: zw57f01.s1 Soares total fetus         | 3438.597  |
| 4576 | RC_AA477755_at_NA_illumina   | EST: zu34c02.s1 Soares ovary tumor         | 3438.6042 |
| 4577 | Y09615_at_GI_14790134-S      | Mitochondrial transcription termination    | 3438.6052 |
| 4578 | J02973_ma1_at_GI_40288292-S  | THBD gene extracted from Human             | 3438.6184 |
| 4579 | U37431_at_GI_24497508-A      | HOXA1 Homeo box A1                         | 3438.643  |
| 4580 | M86528_at_GI_34328933-S      | Neurotrophin-4 (NT-4) gene                 | 3438.7654 |
| 4581 | U63295_at_GI_40254443-S      | Seven in absentia homolog mRNA             | 3438.7788 |
| 4582 | U66497_at_GI_40254463-S      | LEPR Leptin receptor                       | 3438.833  |
| 4583 | RC_AA454607_at_NA_illumina   | EST: zx96c04.s1 Soares ovary tumor         | 3438.8408 |
| 4584 | RC_AA451837_at_GI_19923898-S | EST: zx12e03.s1 Soares total fetus         | 3438.8867 |
| 4585 | L44337_at_NA_illumina        | EST: Homo sapiens thymus mRNA              | 3438.9092 |
| 4586 | L44288_at_NA_illumina        | EST: Homo sapiens thymus mRNA              | 3438.9377 |
| 4587 | R61777_at_NA_illumina        | Heat shock 70kD protein 5 (glucose-        | 3438.984  |
| 4588 | AA402109_at_GI_13376635-S    | EST: zu55a06.r1 Soares ovary tumor         | 3438.9956 |
| 4589 | W28035_at_NA_illumina        | EST: 41a8 Human retina cDNA randomly       | 3439.0383 |

|      |                                |                                            |           |
|------|--------------------------------|--------------------------------------------|-----------|
| 4590 | RC_AA075048_at_NA_illumina     | EST: zm85c11.s1 Stratagene ovarian         | 3439.1296 |
| 4591 | S66896_at_GI_5902071-S         | SCCA1 Squamous cell carcinoma antigen      | 3439.1392 |
| 4592 | X72308_at_GI_13435401-S        | MONOCYTE CHEMOTACTIC PROTEIN 3             | 3439.3066 |
| 4593 | X72308_at-2_NA_illumina        | Small inducible cytokine A7 (monocyte      | 3439.3066 |
| 4594 | HG2743-HT3926_s_at_NA_illumina | Caldesmon 1, Alt. Splice 6, Non-Muscle     | 3439.3284 |
| 4595 | U59914_at_NA_illumina          | Chromosome 15 Mad homolog Smad6            | 3439.334  |
| 4596 | RC_AA621500_at_GI_5453877-S    | EST: af62h11.s1 Soares NhHMPu S1           | 3439.373  |
| 4597 | C14890_at_NA_illumina          | EST: Human fetal brain cDNA 5'-end GEN-    | 3439.5637 |
| 4598 | U06233_at_GI_4758947-S         | POU domain protein (Brn-3b) mRNA           | 3439.5918 |
| 4599 | U64520_at_GI_42544205-S        | Synaptobrevin-3 mRNA                       | 3439.6892 |
| 4600 | AA018298_at_NA_illumina        | EST: ze40c05.r1 Soares retina N2b4HR       | 3439.7185 |
| 4601 | AA010762_at_GI_34147645-S      | Procollagen-lysine, 2-oxoglutarate 5-      | 3439.8367 |
| 4602 | AA362598_at_NA_illumina        | EST: EST72534 Ovary II Homo sapiens        | 3439.876  |
| 4603 | HG3925-HT4195_at_NA_illumina   | Surfacant Protein Sp-A2 Delta              | 3439.949  |
| 4604 | RC_AA428028_s_at_NA_illumina   | EST: zw54g08.s1 Soares total fetus         | 3440.0544 |
| 4605 | AA431876_at_NA_illumina        | EST: zw51h07.r1 Soares total fetus         | 3440.067  |
| 4606 | HG3998-HT4268_at_NA_illumina   | L-Glycerol-3-Phosphate:Nad+                | 3440.1543 |
| 4607 | AA401510_s_at_NA_illumina      | EST: zu63c08.r1 Soares testis NHT Homo     | 3440.2012 |
| 4608 | U36601_at_GI_31377809-S        | Heparan N-deacetylase/N-sulfotransferase-  | 3440.2146 |
| 4609 | AA293789_s_at_NA_illumina      | EST: zt65d10.r1 Soares testis NHT Homo     | 3440.2957 |
| 4610 | S71018_at-2_NA_illumina        | Peptidylprolyl isomerase C (cyclophilin C) | 3440.32   |
| 4611 | S71018_at_GI_45439319-S        | Cyclophilin C [human, kidney, mRNA, 883    | 3440.32   |
| 4612 | M20530_at_GI_45505131-S        | SPINK1 Serine protease inhibitor, Kazal    | 3440.3435 |
| 4613 | AA292569_at_NA_illumina        | EST: zt31d11.r1 Soares ovary tumor         | 3440.3528 |
| 4614 | HG2510-HT2606_at_NA_illumina   | Ras-Specific Guanine Nucleotide-           | 3440.367  |
| 4615 | RC_AA447726_at_NA_illumina     | EST: aa20d11.s1 Soares NhHMPu S1           | 3440.498  |
| 4616 | Z75330_at_GI_5032062-S         | Nuclear protein SA-1                       | 3440.561  |
| 4617 | RC_AA401739_at_NA_illumina     | EST: zt66d09.s1 Soares testis NHT Homo     | 3440.6091 |
| 4618 | M96944_at_GI_9951919-S         | PAIRED BOX PROTEIN PAX-5                   | 3440.68   |
| 4619 | AA490775_at_GI_38788307-S      | EST: aa45g01.r1 Soares NhHMPu S1           | 3440.7273 |
| 4620 | RC_AA235604_at_NA_illumina     | EST: zt36b07.s1 Soares ovary tumor         | 3440.7644 |
| 4621 | AA150614_at_NA_illumina        | EST: zl43h05.r1 Soares pregnant uterus     | 3440.8215 |
| 4622 | U95044_f_at_GI_5454181-S       | Human zinc finger protein (FDZF2) mRNA,    | 3440.8586 |
| 4623 | Z28339_at_GI_5174694-S         | Delta 4-3-oxosteroid 5 beta-reductase      | 3440.8882 |
| 4624 | Z26256_at_NA_illumina          | Isoform 1 gene for L-type calcium channel, | 3440.8882 |
| 4625 | L42450_at_GI_37595546-S        | PDK1 Pyruvate dehydrogenase kinase,        | 3440.9285 |
| 4626 | H66279_at_GI_22035699-A        | Yr72b07.r1 Homo sapiens cDNA clone         | 3440.9426 |
| 4627 | RC_AA283774_at_NA_illumina     | EST: zt18d04.s1 Soares ovary tumor         | 3441.1875 |
| 4628 | U48861_at_GI_4502836-S         | CHRN4 Cholinergic receptor, nicotinic,     | 3441.2266 |
| 4629 | W28696_i_at_NA_illumina        | EST: 50d11 Human retina cDNA randomly      | 3441.4111 |
| 4630 | RC_AA055829_at_GI_26986533-S   | EST: zf21d10.s1 Soares fetal heart         | 3441.458  |
| 4631 | AA215897_at_NA_illumina        | Homo sapiens mRNA for M96A protein         | 3441.5972 |
| 4632 | C02522_at_NA_illumina          | EST: HUMGS0012418, Human Gene              | 3441.6174 |

|      |                              |                                           |           |
|------|------------------------------|-------------------------------------------|-----------|
| 4633 | RC_AA461448_at_GI_17865818-A | EST: zx68b07.s1 Soares total fetus        | 3441.698  |
| 4634 | RC_AA458981_at_NA_illumina   | Parathymosin                              | 3441.7021 |
| 4635 | H52378_at_NA_illumina        | Spectrin, alpha, erythrocytic 1           | 3441.8936 |
| 4636 | AA418130_at_GI_31559787-S    | EST: zv97c03.r1 Soares NhHMPu S1          | 3441.9023 |
| 4637 | D38293_at_GI_14916518-S      | Clathrin-like protein                     | 3441.9207 |
| 4638 | Z48570_at_GI_15718773-S      | Sp17 gene                                 | 3442.0012 |
| 4639 | AA134488_at_NA_illumina      | Zo26f12.r1 Stratagene colon (#937204)     | 3442.3372 |
| 4640 | AA149259_at_GI_15011915-A    | EST: zl25c03.r1 Soares pregnant uterus    | 3442.3445 |
| 4641 | RC_AA443212_at_NA_illumina   | EST: aa14d01.s1 Soares NhHMPu S1          | 3442.3765 |
| 4642 | U91935_at_GI_6005855-S       | Human retina-derived POU-domain factor-   | 3442.3977 |
| 4643 | X91220_at_GI_4506976-S       | Na-Cl electroneutral thiazide-sensitive   | 3442.5977 |
| 4644 | M99435_at_GI_34147712-S      | TRANSDUCIN-LIKE ENHANCER                  | 3442.6204 |
| 4645 | RC_AA293477_at_NA_illumina   | EST: zt48c09.s1 Soares ovary tumor        | 3442.6582 |
| 4646 | U49973_xpt2_at_NA_illumina   | ORF2: function unknown from Human         | 3442.7012 |
| 4647 | L77563_at_NA_illumina        | DGS-F partial mRNA                        | 3442.8198 |
| 4648 | U43431_at-2_NA_illumina      | Human DNA topoisomerase III mRNA,         | 3442.856  |
| 4649 | U43431_at_GI_20143947-S      | DNA topoisomerase III mRNA                | 3442.856  |
| 4650 | X55889_at_NA_illumina        | CNTF Ciliary neurotrophic factor          | 3443.2925 |
| 4651 | X58399_at_GI_39725709-S      | L2-9 transcript of unrearranged           | 3443.3088 |
| 4652 | W44356_at_NA_illumina        | EST: zc27d03.r1 Soares senescent          | 3443.3347 |
| 4653 | RC_AA490814_at_GI_33695110-S | EST: aa49e08.s1 NCI_CGAP_GCB1             | 3443.3804 |
| 4654 | RC_AA251114_at_NA_illumina   | Prostate cancer overexpressed gene 1      | 3443.3958 |
| 4655 | RC_AA436841_at_NA_illumina   | Nuclear factor of kappa light polypeptide | 3443.4478 |
| 4656 | AA203285_at_NA_illumina      | EST: zx57e08.r1 Soares fetal liver spleen | 3443.6238 |
| 4657 | AA402538_at_GI_34147360-S    | Homo sapiens chromosome 19, cosmid        | 3443.6606 |
| 4658 | D90279_s_at_GI_16554578-S    | COL5A1 Collagen, type V, alpha 1          | 3443.661  |
| 4659 | Z80781_at_GI_21166386-S      | H2B/j gene                                | 3443.6797 |
| 4660 | AA247685_at_GI_4758199-S     | Desmoplakin (DPI, DPII)                   | 3443.7368 |
| 4661 | M16714_at-2_NA_illumina      | HLA CLASS I HISTOCOMPATIBILITY            | 3443.838  |
| 4662 | M16714_at_GI_24797070-S      | HLA-E MHC class I antigen HLA-E           | 3443.838  |
| 4663 | M31210_at_GI_13027635-S      | ECGF1 Endothelial differentiation protein | 3444.1018 |
| 4664 | RC_D59388_at_NA_illumina     | EST: Human fetal brain cDNA 3'-end GEN-   | 3444.1577 |
| 4665 | H88128_s_at_GI_11345459-S    | EST: ys75d12.r1 Homo sapiens cDNA         | 3444.1858 |
| 4666 | RC_AA017083_at_NA_illumina   | EST: ze33e11.s1 Soares retina N2b4HR      | 3444.2632 |
| 4667 | AA074933_at_NA_illumina      | Zm85b07.r1 Stratagene ovarian cancer      | 3444.2654 |
| 4668 | U79290_at_GI_31377651-S      | Clone 23908 mRNA sequence                 | 3444.4048 |
| 4669 | U79290_at-2_NA_illumina      | Human clone 23908 mRNA sequence           | 3444.4048 |
| 4670 | W26589_at_NA_illumina        | EST: 33d9 Human retina cDNA randomly      | 3444.439  |
| 4671 | RC_AA252953_at_NA_illumina   | EST: zr52e04.s1 Soares NhHMPu S1          | 3444.5068 |
| 4672 | AA203316_at_NA_illumina      | EST: zx54a08.r1 Soares fetal liver spleen | 3444.5273 |
| 4673 | RC_AA056588_at_GI_44917603-S | EST: zl66a02.s1 Stratagene colon          | 3444.5876 |
| 4674 | RC_AA193689_at_NA_illumina   | EST: zr42h11.s1 Soares NhHMPu S1          | 3444.632  |
| 4675 | X56807_at_NA_illumina        | DESMOCOLLIN 2A/BB PRECURSOR               | 3444.6506 |

|      |                              |                                           |           |
|------|------------------------------|-------------------------------------------|-----------|
| 4676 | X56807_at-2_NA_illumina      | Desmocollin 2                             | 3444.6506 |
| 4677 | M84605_at_NA_illumina        | PUTATIVE TACHYKININ RECEPTOR              | 3444.7715 |
| 4678 | RC_AA232956_at_GI_40255007-S | EST: zr46f11.s1 Soares NhHMPu S1          | 3444.8796 |
| 4679 | AA307471_at_NA_illumina      | Homo sapiens Chromosome 16 BAC clone      | 3444.896  |
| 4680 | U04898_at_GI_19743904-A      | RORA RAR-related orphan receptor A        | 3444.999  |
| 4681 | H16876_at_NA_illumina        | Ym34f05.r1 Homo sapiens cDNA clone        | 3445.0217 |
| 4682 | RC_AA063068_at_NA_illumina   | EST: zf67e04.s1 Soares pineal gland       | 3445.1777 |
| 4683 | X75756_at_NA_illumina        | PRKCM Protein kinase C, mu                | 3445.224  |
| 4684 | AB000381_s_at_GI_4504032-S   | DNA for GPI-anchored molecule-like        | 3445.2764 |
| 4685 | U80982_rna1_s_at_NA_illumina | CCAAT/enhancer binding protein (C/EBP),   | 3445.3755 |
| 4686 | W25781_at_NA_illumina        | Homo sapiens clone 23698 mRNA             | 3445.3835 |
| 4687 | AA204731_at_NA_illumina      | EST: zq55d02.r1 Stratagene                | 3445.3994 |
| 4688 | W86690_at_NA_illumina        | Zh63b01.r1 Soares fetal liver spleen      | 3445.437  |
| 4689 | M25393_at_GI_18104981-A      | PTPN2 Protein tyrosine phosphatase, non-  | 3445.4414 |
| 4690 | X91817_at_GI_7110726-S       | H.sapiens mRNA for transketolase-like     | 3445.478  |
| 4691 | H04961_at_GI_11991659-S      | Homo sapiens mRNA from chromosome         | 3445.4868 |
| 4692 | RC_AA459269_at_NA_illumina   | EST: aa27d04.s1 NCI_CGAP_GCB1             | 3445.526  |
| 4693 | RC_AA024866_at_NA_illumina   | EST: ze79b09.s1 Soares fetal heart        | 3445.5374 |
| 4694 | L37868_s_at_GI_5031982-S     | POU-domain transcription factor (N-Oct-3) | 3445.552  |
| 4695 | RC_AA455000_at_GI_38045939-S | EST: zx99g09.s1 Soares NhHMPu S1          | 3445.6743 |
| 4696 | N35449_at_NA_illumina        | EST: yx90d09.r1 Homo sapiens cDNA         | 3445.7405 |
| 4697 | AA426188_at_NA_illumina      | EST: zw11e08.r1 Soares NhHMPu S1          | 3445.8145 |
| 4698 | U62317_rna6_at_NA_illumina   | Hypothetical protein 384D8_6 gene         | 3445.8184 |
| 4699 | RC_AA195249_at_GI_21314727-S | EST: zr36d01.s1 Soares NhHMPu S1          | 3446.0203 |
| 4700 | N29076_at_NA_illumina        | EST: yx41e01.r1 Homo sapiens cDNA         | 3446.1467 |
| 4701 | L77701_at_GI_5031644-S       | COX17 mRNA                                | 3446.1646 |
| 4702 | W24127_at_NA_illumina        | Retinoblastoma-binding protein 4          | 3446.1853 |
| 4703 | AB002354_at_GI_40538727-S    | KIAA0356 gene product                     | 3446.198  |
| 4704 | AA365031_s_at_NA_illumina    | EST: EST75974 Pineal gland II Homo        | 3446.4165 |
| 4705 | Y10506_at_NA_illumina        | CD110 protein                             | 3446.4204 |
| 4706 | D10925_at_GI_4502630-S       | CMKBR1 Chemokine (C-C) receptor 1         | 3446.4448 |
| 4707 | R88228_at_NA_illumina        | Homo sapiens mRNA for JM4 protein,        | 3446.5327 |
| 4708 | L48211_at_NA_illumina        | Angiotensin II receptor gene              | 3446.5698 |
| 4709 | AA033703_at_GI_22547143-A    | EST: zf01d10.r1 Soares fetal heart        | 3446.6274 |
| 4710 | Z38026_at_GI_39753969-S      | CAP-18 protein                            | 3446.6345 |
| 4711 | AA203645_at_NA_illumina      | EST: zx58d12.r1 Soares fetal liver spleen | 3446.6978 |
| 4712 | R11248_at_NA_illumina        | EST: yf41c02.r1 Homo sapiens cDNA         | 3446.8477 |
| 4713 | M33772_s_at_GI_40807466-S    | TNNC2 Troponin C2 (fast skeletal)         | 3446.9414 |
| 4714 | D21337_at_GI_16357500-A      | COL4A6 Collagen, type IV, alpha 6         | 3446.9841 |
| 4715 | U52700_at_NA_illumina        | Tenascin-X (XB) mRNA, RACE clone N1,      | 3447.0662 |
| 4716 | RC_AA009527_at_GI_33563375-S | EST: ze83a02.s1 Soares fetal heart        | 3447.1455 |
| 4717 | RC_AA039358_at_NA_illumina   | EST: zf05d10.s1 Soares fetal heart        | 3447.176  |
| 4718 | D45213_at_GI_21359908-S      | Homo sapiens mRNA for zinc finger         | 3447.1824 |

|      |                              |                                               |           |
|------|------------------------------|-----------------------------------------------|-----------|
| 4719 | X99656_at_GI_4506928-S       | Protein containing SH3 domain, SH3GL1         | 3447.1824 |
| 4720 | RC_AA457140_at_GI_23065521-S | EST: zx84f04.s1 Soares ovary tumor            | 3447.2588 |
| 4721 | AA478194_at_NA_illumina      | Murine leukemia viral (bmi-1) oncogene        | 3447.2896 |
| 4722 | RC_AA421759_at_GI_20127480-S | Homo sapiens mRNA for LAFPTPase,              | 3447.382  |
| 4723 | R66239_at_GI_21955171-S      | EST: yi34d06.r1 Homo sapiens cDNA             | 3447.4565 |
| 4724 | L76568_xpt3_f_at_NA_illumina | S26 from Homo sapiens excision and            | 3447.5798 |
| 4725 | R14545_at_NA_illumina        | EST: yf84f08.r1 Homo sapiens cDNA             | 3447.622  |
| 4726 | RC_AA417046_at_GI_23111065-S | Fatty-acid-Coenzyme A ligase, very long-      | 3447.786  |
| 4727 | RC_D59362_at_NA_illumina     | EST: Human fetal brain cDNA 3'-end GEN-       | 3447.7869 |
| 4728 | W69543_at_GI_31543612-S      | EST: zd45e08.r1 Soares fetal heart            | 3447.9058 |
| 4729 | Y08613_at_NA_illumina        | RABAPTIN-5 protein                            | 3447.9512 |
| 4730 | AA165144_i_at_NA_illumina    | EST: zo94e09.r1 Stratagene ovarian            | 3448.0618 |
| 4731 | X95152_rna1_at_GI_4502450-S  | Brca2 gene exon 2 (and joined coding          | 3448.1028 |
| 4732 | RC_AA470145_at_NA_illumina   | EST: zu11f02.s1 Soares testis NHT Homo        | 3448.1062 |
| 4733 | U66088_at-2_NA_illumina      | Solute carrier family 5 (sodium iodide        | 3448.18   |
| 4734 | U66088_at_GI_4507034-S       | Sodium iodide symporter mRNA                  | 3448.18   |
| 4735 | RC_AA405744_at_GI_7705784-S  | EST: zu66f10.s1 Soares testis NHT Homo        | 3448.1833 |
| 4736 | M99436_at_GI_34147648-S      | TRANSDUCIN-LIKE ENHANCER                      | 3448.2795 |
| 4737 | U15131_at_GI_21264613-A      | HTS1                                          | 3448.296  |
| 4738 | RC_AA258792_at_GI_24431974-S | EST: zs32c02.s1 NCI_CGAP_GCB1                 | 3448.3694 |
| 4739 | AA381902_at_NA_illumina      | EST: EST95112 Activated T-cells I Homo        | 3448.4011 |
| 4740 | M21302_at_NA_illumina        | Small proline rich protein (sprll) mRNA,      | 3448.4246 |
| 4741 | RC_AA350817_at_NA_illumina   | EST: EST58559 Infant brain Homo               | 3448.43   |
| 4742 | AA304566_at_GI_40254892-S    | EST: EST17372 Aorta endothelial cells,        | 3448.4417 |
| 4743 | HG3115-HT3291_at_NA_illumina | Golli-Mbp (Gb:L18862)                         | 3448.4575 |
| 4744 | M32011_at_GI_4557786-S       | NCF2 Neutrophil cytosolic factor 2 (65kD,     | 3448.4666 |
| 4745 | U32907_at_GI_5031970-S       | P37NB mRNA                                    | 3448.4875 |
| 4746 | RC_AA609046_at_NA_illumina   | EST: af10e05.s1 Soares testis NHT Homo        | 3448.5007 |
| 4747 | AA203413_at_NA_illumina      | EST: zx56b08.r1 Soares fetal liver spleen     | 3448.6194 |
| 4748 | D38502_at_GI_31341385-S      | PMS4 mRNA (yeast mismatch repair gene         | 3448.6882 |
| 4749 | S77583_at_NA_illumina        | HERVK10/HUMMTV reverse transcriptase          | 3448.7007 |
| 4750 | RC_AA443913_at_GI_40255002-S | EST: zv46g06.s1 Soares ovary tumor            | 3448.712  |
| 4751 | L77566_at_GI_13027629-S      | DGS-I mRNA, 3' end                            | 3448.7393 |
| 4752 | L77566_at-2_NA_illumina      | Homo sapiens DGS-I mRNA, 3' end               | 3448.7393 |
| 4753 | X68505_s_at_NA_illumina      | Myocyte-specific enhancer factor 2 (MEF2)     | 3448.9763 |
| 4754 | L19783_at_GI_24430187-S      | GPI-H mRNA                                    | 3449.0964 |
| 4755 | RC_AA088707_at_NA_illumina   | EST: zl83g03.s1 Stratagene colon              | 3449.1365 |
| 4756 | U63542_at_GI_37540892-S      | Putative FAP protein mRNA, partial cds        | 3449.189  |
| 4757 | HG961-HT961_at_NA_illumina   | Guanine Nucleotide Exchange Factor 2          | 3449.2192 |
| 4758 | AA397563_at_NA_illumina      | ATPase, Ca <sup>++</sup> transporting, plasma | 3449.2996 |
| 4759 | X00368_xpt2_at_NA_illumina   | Exon 1 from Human prolactin gene 5'           | 3449.3545 |
| 4760 | RC_AA262880_at_GI_25777700-A | EST: zs26b02.s1 NCI_CGAP_GCB1                 | 3449.3757 |
| 4761 | RC_AA281251_at_NA_illumina   | EST: zs94e03.s1 NCI_CGAP_GCB1                 | 3449.497  |

|      |                                |                                              |           |
|------|--------------------------------|----------------------------------------------|-----------|
| 4762 | W28051_at_GI_21687227-S        | EST: 41c3 Human retina cDNA randomly         | 3449.666  |
| 4763 | Z19585_at_GI_40549419-S        | THBS4 Thrombospondin 4                       | 3449.793  |
| 4764 | N99542_at_NA_illumina          | Orosomucoid 1                                | 3449.8225 |
| 4765 | X98833_rna1_at_GI_6997248-S    | Zinc finger protein, Hsa1                    | 3449.861  |
| 4766 | RC_AA419547_at_GI_38201715-A   | EST: zv04a05.s1 Soares NhHMPu S1             | 3449.8938 |
| 4767 | M27288_at_GI_28178862-S        | Oncostatin M gene, exon 3                    | 3449.9058 |
| 4768 | X65633_at_GI_4505126-S         | ACTH-R gene for adrenocorticotropic          | 3450.0232 |
| 4769 | M65291_at_GI_24430218-S        | IL12A Natural killer cell stimulatory factor | 3450.0273 |
| 4770 | RC_D51172_at_NA_illumina       | EST: Human fetal brain cDNA 3'-end GEN-      | 3450.0273 |
| 4771 | U57352_at_GI_34452696-A        | Sodium channel 1 (hBNaC1) mRNA               | 3450.0334 |
| 4772 | AA442428_at_GI_31542719-S      | EST: zv70f08.r1 Soares total fetus           | 3450.0627 |
| 4773 | RC_AA491291_at_GI_21314708-S   | EST: aa53c09.s1 NCI_CGAP_GCB1                | 3450.0764 |
| 4774 | L07868_at_GI_4885214-S         | ERBB4 V-erb-a avian erythroblastic           | 3450.1118 |
| 4775 | L10102_rna1_at_GI_4507224-S    | Sex-determining region Y (SRY) gene          | 3450.1907 |
| 4776 | R56728_at_GI_27477123-A        | EST: yg95c06.r1 Homo sapiens cDNA            | 3450.2603 |
| 4777 | HG4027-HT4297_f_at_NA_illumina | Beta-1-Glycoprotein, Domains N And lia,      | 3450.3398 |
| 4778 | AA027760_at_GI_38570061-S      | EST: HPLA_CCLEE_40f6ar HPLA CCLee            | 3450.4067 |
| 4779 | AA456471_s_at_GI_7662409-S     | EST: zx74g11.r1 Soares ovary tumor           | 3450.4504 |
| 4780 | RC_AA404543_at_NA_illumina     | EST: zw37h03.s1 Soares total fetus           | 3450.4597 |
| 4781 | AA401547_at_NA_illumina        | EST: zu62a05.r1 Soares testis NHT Homo       | 3450.4636 |
| 4782 | W01996_at_GI_7705609-S         | EST: za31e11.r1 Soares fetal liver spleen    | 3450.5251 |
| 4783 | S76475_at_GI_4505474-S         | NTRK3 Neurotrophic tyrosine kinase,          | 3450.5593 |
| 4784 | RC_AA401763_at_NA_illumina     | EST: zt53g11.s1 Soares ovary tumor           | 3450.6196 |
| 4785 | U43030_at_GI_40788012-S        | Cardiotrophin-1 (CTF1) mRNA                  | 3450.6736 |
| 4786 | D63876_at_GI_20336265-A        | KIAA0154 gene, partial cds                   | 3450.6946 |
| 4787 | R08723_at_NA_illumina          | EST: yf24f04.r1 Homo sapiens cDNA            | 3450.745  |
| 4788 | RC_AA404961_at_NA_illumina     | EST: zu19b10.s1 Soares NhHMPu S1             | 3450.7805 |
| 4789 | RC_AA443752_at_NA_illumina     | EST: zw95c06.s1 Soares total fetus           | 3450.8066 |
| 4790 | D64053_at_GI_19743916-A        | Protein-tyrosine phosphatase                 | 3450.8162 |
| 4791 | X17644_s_at_GI_4504166-S       | GSPT1 G1 to S phase transition 1             | 3450.9165 |
| 4792 | L26234_at_GI_5921994-A         | APOBEC1 Apolipoprotein B mRNA editing        | 3450.9934 |
| 4793 | AA460077_at_GI_16950598-S      | EST: zx66e06.r1 Soares total fetus           | 3451.0483 |
| 4794 | X82324_at_GI_4505962-S         | POU3F4 POU domain, class 3,                  | 3451.0623 |
| 4795 | S78569_at_GI_9845494-S         | LAMA4 Laminin, alpha 4                       | 3451.2295 |
| 4796 | W27332_at_NA_illumina          | Human leucine zipper on the D14S46E          | 3451.2634 |
| 4797 | RC_AA069571_at_NA_illumina     | Homo sapiens clone 24616 mRNA                | 3451.308  |
| 4798 | RC_AA481994_at_NA_illumina     | Human DNA sequence from cosmid               | 3451.3186 |
| 4799 | AA203236_at_GI_21040276-S      | EST: zx54g10.r1 Soares fetal liver spleen    | 3451.367  |
| 4800 | X51801_at_GI_4502426-S         | BMP7 Bone morphogenetic protein 7            | 3451.3906 |
| 4801 | X96783_rna1_at_GI_4507336-S    | Syt V gene (genomic and cDNA sequence)       | 3451.4033 |
| 4802 | AA306264_at_GI_21361810-S      | EST: EST177232 Jurkat T-cells VI Homo        | 3451.4902 |
| 4803 | X78686_at_NA_illumina          | NEUTROPHIL ACTIVATING PROTEIN                | 3451.4934 |
| 4804 | X78686_at-2_NA_illumina        | Small inducible cytokine subfamily B (Cys-   | 3451.4934 |



|      |                              |                                         |           |
|------|------------------------------|-----------------------------------------|-----------|
| 4805 | L40399_at_GI_7657336-S       | (clone S240ii117/zap112) mRNA           | 3451.551  |
| 4806 | RC_AA464962_at_GI_19923429-S | EST: zx80f06.s1 Soares ovary tumor      | 3451.5615 |
| 4807 | AF005037_at_GI_33598918-A    | Secretory carrier membrane protein      | 3451.5906 |
| 4808 | M18533_at_NA_illumina        | DMD Dystrophin (muscular dystrophy,     | 3451.671  |
| 4809 | AA133029_at_GI_11119413-S    | Homo sapiens TACC2 protein (TACC2)      | 3451.6846 |
| 4810 | U86529_at_GI_22202625-A      | Glutathione transferase Zeta 1 (GSTZ1)  | 3451.7427 |
| 4811 | U68385_at_NA_illumina        | Meis1-related protein 2 (MRG2), mRNA,   | 3451.7498 |
| 4812 | RC_AA598723_at_GI_20149672-A | EST: ae49e10.s1 Stratagene lung         | 3451.7866 |
| 4813 | U44059_at_GI_34486096-S      | Thyrotroph embryonic factor (TEF) mRNA  | 3451.8145 |
| 4814 | AA319514_at_GI_22027537-S    | EST21750 Adrenal gland tumor Homo       | 3451.9172 |
| 4815 | D16154_at_GI_13904852-S      | Cytochrome P-450c11, exon 3-9           | 3451.9753 |
| 4816 | AA488793_at_NA_illumina      | Aa54d11.r1 NCI_CGAP_GCB1 Homo           | 3452.0215 |
| 4817 | X87159_at_GI_4506816-S       | Beta subunit of epithelial amiloride-   | 3452.0579 |
| 4818 | RC_AA447722_at_GI_27886581-A | EST: aa20d05.s1 Soares NhHMPu S1        | 3452.07   |
| 4819 | RC_AA164687_at_NA_illumina   | EST: zo93d12.s1 Stratagene ovarian      | 3452.0837 |
| 4820 | X06256_at_GI_4504750-S       | ITGA5 Integrin, alpha 5 (fibronectin    | 3452.1711 |
| 4821 | RC_AA358109_at_NA_illumina   | EST: EST67051 Fetal lung III Homo       | 3452.1792 |
| 4822 | RC_AA252616_at_GI_37552380-S | EST: zs14d03.s1 NCI_CGAP_GCB1           | 3452.3298 |
| 4823 | RC_AA478517_at_GI_4505600-S  | EST: zw95d09.s1 Soares total fetus      | 3452.3328 |
| 4824 | AA421370_at_NA_illumina      | EST: zu06e06.r1 Soares testis NHT Homo  | 3452.3533 |
| 4825 | U34976_at_GI_4557846-S       | Gamma-sarcoglycan mRNA                  | 3452.3574 |
| 4826 | RC_D60372_f_at_GI_14780903-S | EST: Human fetal brain cDNA 3'-end GEN- | 3452.3738 |
| 4827 | RC_AA455987_at_GI_31542512-S | EST: aa02c04.s1 Soares NhHMPu S1        | 3452.3772 |
| 4828 | RC_AA228124_at_GI_19718798-A | RAD1 (S. pombe) homolog                 | 3452.3855 |
| 4829 | RC_AA291269_at_NA_illumina   | Homo sapiens mRNA for KIAA0776          | 3452.4802 |
| 4830 | HG4051-HT4321_at_NA_illumina | Choline Acetyltransferase               | 3452.492  |
| 4831 | AFFX-HUMTFRR/M11507_5_at-    | Transferrin receptor (p90, CD71)        | 3452.5566 |
| 4832 | AFFX-                        | AFFX-HUMTFRR/M11507_5_at                | 3452.5566 |
| 4833 | RC_AA452894_at_NA_illumina   | EST: zx36h04.s1 Soares total fetus      | 3452.5586 |
| 4834 | AA046732_at_GI_6912417-S     | EST: zk72a07.r1 Soares pregnant uterus  | 3452.559  |
| 4835 | X06825_at_NA_illumina        | Skeletal beta-tropomyosin               | 3452.6484 |
| 4836 | U29589_at_GI_4502818-S       | MUSCARINIC ACETYLCHOLINE                | 3452.754  |
| 4837 | RC_AA255930_at_GI_30794213-S | EST: zs28e06.s1 NCI_CGAP_GCB1           | 3452.7786 |
| 4838 | RC_D60050_at_NA_illumina     | EST: Human fetal brain cDNA 3'-end GEN- | 3452.8657 |
| 4839 | AA092261_at_GI_8400731-S     | Secreted frizzled-related protein 1     | 3452.9097 |
| 4840 | X07618_s_at-2_NA_illumina    | Human mRNA for cytochrome P450 db1      | 3452.9153 |
| 4841 | X07618_s_at_GI_40805835-S    | Cytochrome P450 db1 variant a           | 3452.9153 |
| 4842 | U22233_at_GI_6006025-S       | MTAP Methylthioadenosine phosphorylase  | 3453.0554 |
| 4843 | U19495_s_at_NA_illumina      | Interocrine-alpha (hIRH) mRNA           | 3453.0784 |
| 4844 | RC_C14983_at_NA_illumina     | EST: Human fetal brain cDNA 3'-end GEN- | 3453.0876 |
| 4845 | AA156670_r_at_NA_illumina    | Homo sapiens agrin precursor mRNA,      | 3453.1233 |
| 4846 | RC_AA251737_at_NA_illumina   | Apg12 (autophagy, yeast) homolog        | 3453.226  |
| 4847 | D79998_at_NA_illumina        | KIAA0176 gene, partial cds              | 3453.2483 |

|      |                                |                                           |           |
|------|--------------------------------|-------------------------------------------|-----------|
| 4848 | W25912_at_NA_illumina          | Heterogeneous nuclear ribonucleoprotein   | 3453.2502 |
| 4849 | W27325_at_NA_illumina          | Homo sapiens mRNA for GCP170,             | 3453.3281 |
| 4850 | RC_AA476415_at_NA_illumina     | EST: zx02a09.s1 Soares total fetus        | 3453.3674 |
| 4851 | RC_AA205399_at_GI_41281674-l   | EST: zq79g01.s1 Stratagene hNT neuron     | 3453.3975 |
| 4852 | X78342_at_GI_32528264-A        | (clone PK2J) CDC2-related protein kinase  | 3453.4167 |
| 4853 | U28758_s_at_NA_illumina        | NMDA receptor subtype 2B subunit          | 3453.4744 |
| 4854 | W27054_at_GI_18490986-S        | APOLIPOPROTEIN AI REGULATORY              | 3453.4805 |
| 4855 | M77810_at_NA_illumina          | GATA2 GATA-binding protein 2              | 3453.4814 |
| 4856 | RC_AA243562_at_GI_38488719-S   | EST: zs15h06.s1 NCI_CGAP_GCB1             | 3453.5435 |
| 4857 | HG2730-HT2828_s_at_NA_illumina | Fibrinogen, A Alpha Polypeptide, Alt.     | 3453.558  |
| 4858 | RC_AA134965_i_at_NA_illumina   | EST: zo23g05.s1 Stratagene colon          | 3453.5688 |
| 4859 | RC_AA404381_f_at_NA_illumina   | EST: zw37a04.s1 Soares total fetus        | 3453.6072 |
| 4860 | L33881_at_GI_34222297-S        | PRKCI Protein kinase C, iota              | 3453.6316 |
| 4861 | HG1437-HT1437_s_at_NA_illumina | Proto-Oncogene Trk                        | 3453.661  |
| 4862 | U50330_at_GI_5902810-A         | BMP1 Bone morphogenetic protein 1         | 3453.736  |
| 4863 | AB002380_at_GI_7662087-S       | KIAA0382 gene, partial cds                | 3453.8455 |
| 4864 | RC_AA464603_at_GI_8923529-S    | EST: aa11f10.s1 Soares NhHMPu S1          | 3453.8713 |
| 4865 | HG4258-HT4528_at_NA_illumina   | Kinase Inhibitor P27kip1, Cyclin-         | 3453.8943 |
| 4866 | N80402_at_GI_29570787-A        | EST: yz92b08.r1 Homo sapiens cDNA         | 3453.9856 |
| 4867 | U19147_s_at_NA_illumina        | GAGE4 G antigen 6 (GAGE-6)                | 3454.0635 |
| 4868 | D13645_at_GI_33620772-S        | KIAA0020 gene                             | 3454.0642 |
| 4869 | AA096157_at_NA_illumina        | EST: l8359.seq.F Fetal heart, Lambda      | 3454.1282 |
| 4870 | AA282383_at_GI_20336301-S      | EST: zs89a03.r1 NCI_CGAP_GCB1 Homo        | 3454.14   |
| 4871 | AA278548_at_GI_34147454-S      | EST: zs76c05.r1 NCI_CGAP_GCB1 Homo        | 3454.1506 |
| 4872 | L34657_at_GI_21314616-S        | PECAM1 Platelet/endothelial cell adhesion | 3454.3213 |
| 4873 | H62426_at_NA_illumina          | Ribosomal protein S25                     | 3454.3335 |
| 4874 | M15353_at_GI_4503534-S         | EIF4E Eukaryotic translation initiation   | 3454.47   |
| 4875 | H81492_at_NA_illumina          | EST: yu61d04.r1 Homo sapiens cDNA         | 3454.4888 |
| 4876 | RC_AA242931_at_GI_21361941-S   | EST: zr26a02.s1 Stratagene NT2 neuronal   | 3454.6167 |
| 4877 | AA039806_at_NA_illumina        | Msh (Drosophila) homeo box homolog 1      | 3454.636  |
| 4878 | J03589_at_NA_illumina          | UBIQUITIN-LIKE PROTEIN GDX                | 3454.6733 |
| 4879 | U31201_cds2_s_at_NA_illumina   | Laminin gamma2 chain gene (LAMC2)         | 3454.8518 |
| 4880 | X00540_at_NA_illumina          | PRL Prolactin                             | 3454.8723 |
| 4881 | Z29064_at_GI_4503592-S         | EPS15 Epidermal growth factor receptor    | 3454.9006 |
| 4882 | RC_AA505067_at_GI_37541367-S   | EST: aa63h01.s1 NCI_CGAP_GCB1             | 3454.9146 |
| 4883 | AA442383_at_GI_5174494-S       | EST: zv62d10.r1 Soares testis NHT Homo    | 3454.917  |
| 4884 | U73524_at-2_NA_illumina        | Human putative ATP/GTP-binding protein    | 3454.9292 |
| 4885 | U73524_at_GI_5803028-S         | Putative ATP/GTP-binding protein (HEAB)   | 3454.9292 |
| 4886 | RC_AA236806_at_GI_37540384-S   | EST: zs43b09.s1 Soares NhHMPu S1          | 3454.9473 |
| 4887 | AA486248_at_NA_illumina        | EST: ab14g07.r1 Stratagene lung           | 3454.9932 |
| 4888 | D80620_at_GI_10440557-S        | Homo sapiens RET finger protein-like 1    | 3455.0156 |
| 4889 | U55312_rna1_s_at_NA_illumina   | G protein-coupled receptor 19             | 3455.1453 |
| 4890 | L20859_at_GI_31543629-S        | Leukemia virus receptor 1 (GLVR1) mRNA    | 3455.2065 |

|      |                              |                                          |           |
|------|------------------------------|------------------------------------------|-----------|
| 4891 | D13630_at_NA_illumina        | KIAA0005 gene                            | 3455.235  |
| 4892 | RC_AA232184_at_GI_20070291-S | EST: zr25a06.s1 Stratagene NT2 neuronal  | 3455.3022 |
| 4893 | R73842_at_GI_42560232-I      | EST: yi55f09.r1 Homo sapiens cDNA clone  | 3455.307  |
| 4894 | RC_AA448238_at_GI_32307165-S | Homo sapiens mRNA for KIAA0915           | 3455.32   |
| 4895 | RC_AA234893_at_NA_illumina   | EST: zs36b10.s1 Soares NhHMPu S1         | 3455.4058 |
| 4896 | L41066_at_GI_37595561-S      | NF-AT3 mRNA                              | 3455.4143 |
| 4897 | RC_AA481266_at_NA_illumina   | EST: aa35b12.s1 NCI_CGAP_GCB1            | 3455.4387 |
| 4898 | N75765_at_GI_5031864-S       | EST: yw30b03.r1 Homo sapiens cDNA        | 3455.4626 |
| 4899 | J05448_at_GI_14702172-A      | POLR2C RNA polymerase II, polypeptide    | 3455.4907 |
| 4900 | N48204_at_GI_7657241-S       | EST: yv22a08.r1 Homo sapiens cDNA        | 3455.5183 |
| 4901 | Z12173_at_GI_42490755-S      | GNS Glucosamine (N-acetyl)-6-sulfatase   | 3455.6511 |
| 4902 | U06632_at_GI_4758023-S       | P80-COILIN                               | 3455.664  |
| 4903 | H85807_at_GI_22547200-S      | EST: ys91d08.r1 Homo sapiens cDNA        | 3455.7605 |
| 4904 | RC_AA279913_at_NA_illumina   | EST: zs88b05.s1 NCI_CGAP_GCB1            | 3455.8472 |
| 4905 | HG1139-HT4910_at_NA_illumina | Fk506-Binding Protein, Alt. Splice 2     | 3455.8748 |
| 4906 | L04510_at_NA_illumina        | Nucleotide binding protein mRNA          | 3456.0134 |
| 4907 | M55542_at_GI_4503938-S       | GBP1 Guanylate binding protein 1,        | 3456.0515 |
| 4908 | Z18951_at_GI_15451855-S      | CAV Caveolin, caveolae protein, 22kD     | 3456.0598 |
| 4909 | RC_AA464847_at_GI_31982870-S | EST: zx44g07.s1 Soares total fetus       | 3456.087  |
| 4910 | AA481107_at_NA_illumina      | EST: aa29d01.r1 NCI_CGAP_GCB1            | 3456.1348 |
| 4911 | RC_AA417895_at_GI_22035585-A | EST: zv05e06.s1 Soares NhHMPu S1         | 3456.1736 |
| 4912 | J00277_at_GI_4885424-A       | (genomic clones lambda-[SK2-T2,          | 3456.2432 |
| 4913 | W16686_at_GI_7019554-S       | Differentiated Embryo Chondrocyte        | 3456.2961 |
| 4914 | AA071223_at_NA_illumina      | EST: zf79f10.r1 Soares pineal gland      | 3456.3728 |
| 4915 | L07594_at_GI_4507470-S       | TGFBR3 Transforming growth factor, beta  | 3456.5618 |
| 4916 | HG3859-HT4129_at_NA_illumina | Mage-4a Antigen                          | 3456.5671 |
| 4917 | RC_AA157001_at_NA_illumina   | EST: zl19f07.s1 Soares pregnant uterus   | 3456.6414 |
| 4918 | M16801_at_GI_4505198-S       | MLR Mineralocorticoid receptor           | 3456.6555 |
| 4919 | RC_AA454967_at_GI_31543547-S | EST: zx99b12.s1 Soares NhHMPu S1         | 3456.7139 |
| 4920 | U67156_at_GI_21536459-S      | Mitogen-activated kinase kinase kinase 5 | 3456.771  |
| 4921 | W58612_at_GI_20452463-S      | EST: zd19g10.r1 Soares fetal heart       | 3456.794  |
| 4922 | AA136369_at_NA_illumina      | EST: zk93d06.r1 Soares pregnant uterus   | 3456.8452 |
| 4923 | RC_AA394141_at_GI_31377582-S | EST: zt49f05.s1 Soares ovary tumor       | 3456.9055 |
| 4924 | L29306_s_at_GI_4759247-S     | Tryptophan hydroxylase (Tph) mRNA        | 3456.9165 |
| 4925 | AA307896_at_GI_26638658-S    | Nuclear localization signal deleted in   | 3456.933  |
| 4926 | U40152_s_at_GI_31795543-S    | Origin recognition complex 1 (HsORC1)    | 3457.0107 |
| 4927 | W27440_at_NA_illumina        | Homo sapiens mRNA for KIAA0914           | 3457.1506 |
| 4928 | RC_AA424044_at_GI_28610154-A | Core-binding factor, runt domain, alpha  | 3457.1567 |
| 4929 | M20778_s_at_GI_17149810-A    | Homo sapien, alpha-3 (VI) collagen       | 3457.1665 |
| 4930 | AA090910_at_GI_24432015-S    | EST: yy1079.seq.F Fetal heart, Lambda    | 3457.2432 |
| 4931 | M58297_at_GI_37622344-A      | ZNF42 Zinc finger protein 42 (myeloid-   | 3457.2944 |
| 4932 | AA545746_at_GI_38569465-S    | HBMSF1B1-REV Human Bone Marrow           | 3457.344  |
| 4933 | U89336_cds7_at_GI_20336250-A | Unknown gene extracted from Human HLA    | 3457.4023 |

|      |                              |                                           |           |
|------|------------------------------|-------------------------------------------|-----------|
| 4934 | W26130_at_NA_illumina        | H.sapiens mRNA for ragB protein           | 3457.4229 |
| 4935 | U27109_at_GI_45269140-S      | Prepromultimerin mRNA                     | 3457.5022 |
| 4936 | K00627_at_NA_illumina        | FSHD region gene 1                        | 3457.564  |
| 4937 | RC_AA279176_at_NA_illumina   | CD68 antigen                              | 3457.5674 |
| 4938 | AA291334_at_NA_illumina      | EST: zs20g02.r1 NCI_CGAP_GCB1 Homo        | 3457.6409 |
| 4939 | HG3897-HT4167_at_NA_illumina | Sodium Channel, Type Iii, Alpha Subunit,  | 3457.6753 |
| 4940 | AF005775_at_GI_21361768-S    | Caspase-like apoptosis regulatory protein | 3457.7217 |
| 4941 | AA398863_at_GI_21362101-S    | Zt80f04.r1 Soares testis NHT Homo         | 3457.7268 |
| 4942 | RC_AA402800_at_NA_illumina   | EST: zu49d12.s1 Soares ovary tumor        | 3457.758  |
| 4943 | U18932_at_GI_40254440-S      | HSST Heparan sulfate-N-deacetylase/N-     | 3457.862  |
| 4944 | R62676_at_NA_illumina        | Rho-associated, coiled-coil containing    | 3457.8984 |
| 4945 | W24962_at_NA_illumina        | EST: zb65a09.r1 Soares fetal lung         | 3457.964  |
| 4946 | RC_AA621428_at_NA_illumina   | EST: af34g10.s1 Soares total fetus        | 3458.0122 |
| 4947 | AA490564_at_NA_illumina      | EST: aa42g01.r1 Soares NhHMPu S1          | 3458.0771 |
| 4948 | X05997_at_GI_4758675-S       | Gastric lipase                            | 3458.2844 |
| 4949 | X78933_at_GI_31377803-S      | ZNF10 Zinc finger protein 10 (KOX 1)      | 3458.3777 |
| 4950 | AA384827_at_GI_40254918-S    | EST: EST98578 Thyroid Homo sapiens        | 3458.4045 |
| 4951 | X98258_at_GI_37537695-S      | M-phase phosphoprotein, mpp9              | 3458.5498 |
| 4952 | X98258_at-2_NA_illumina      | H.sapiens mRNA for M-phase                | 3458.5498 |
| 4953 | AA479567_at_NA_illumina      | EST: zu42b02.r1 Soares ovary tumor        | 3458.7148 |
| 4954 | X87342_at_GI_4758679-S       | Giant larvae homolog                      | 3458.7256 |
| 4955 | L40157_at_GI_4503468-S       | P162 mRNA                                 | 3458.7341 |
| 4956 | M27093_s_at_NA_illumina      | DBT Dihydrolipoamide branched chain       | 3458.7683 |
| 4957 | Z70218_s_at_NA_illumina      | MN1 protein (clone ICRFp507I0498)         | 3458.7727 |
| 4958 | M21665_s_at_GI_4557772-S     | MYH7 Myosin, heavy polypeptide 7,         | 3458.8545 |
| 4959 | S55606_at_GI_4502460-S       | BTC Betacellulin                          | 3458.862  |
| 4960 | AA113913_at_NA_illumina      | Zm80h09.r1 Stratagene neuroepithelium     | 3458.9263 |
| 4961 | AF000545_at_GI_38327547-A    | Putative purinergic receptor P2Y10 gene   | 3459.0889 |
| 4962 | AA040628_at_NA_illumina      | SYNAPTOTAGMIN I                           | 3459.1936 |
| 4963 | U21051_ma1_at_GI_4885334-S   | G protein-coupled receptor (GPR4) gene    | 3459.2017 |
| 4964 | U68135_s_at_NA_illumina      | U68135 Human cell line PCI-O6B Homo       | 3459.2986 |
| 4965 | M34057_at_GI_4557730-S       | LTBP1 Latent transforming growth factor   | 3459.324  |
| 4966 | RC_AA132874_at_GI_33636761-S | EST: zo19e03.s1 Stratagene colon          | 3459.328  |
| 4967 | AA430594_at_NA_illumina      | Neuroblastoma RAS viral (v-ras) oncogene  | 3459.4348 |
| 4968 | M19301_at_GI_4503264-S       | DBT Dihydrolipoamide branched chain       | 3459.5947 |
| 4969 | R76185_s_at_GI_41350211-S    | EST: yi71h07.r1 Homo sapiens cDNA         | 3459.7134 |
| 4970 | RC_AA176446_at_GI_24308198-S | EST: zp37d04.s1 Stratagene muscle         | 3459.7456 |
| 4971 | AA075413_at_NA_illumina      | Zm88d06.r1 Stratagene ovarian cancer      | 3459.7937 |
| 4972 | U79301_at_NA_illumina        | Clone 23842 mRNA sequence                 | 3459.921  |
| 4973 | U79301_at-2_NA_illumina      | Human clone 23842 mRNA sequence           | 3459.921  |
| 4974 | L13291_s_at_GI_40549393-S    | ADP-ribosylarginine hydrolase             | 3459.9927 |
| 4975 | W20450_at_NA_illumina        | EST: zb24b06.r1 Soares fetal lung         | 3459.9973 |
| 4976 | HG2936-HT3080_at_NA_illumina | Immunoglobulin Heavy Chain, Enhancer      | 3460.1638 |

|      |                                |                                              |           |
|------|--------------------------------|----------------------------------------------|-----------|
| 4977 | X02956_at_GI_4504596-S         | IFNA5 Interferon, alpha 5                    | 3460.2195 |
| 4978 | U59325_at_GI_16445394-S        | Cadherin-14 mRNA                             | 3460.2239 |
| 4979 | D49387_at_GI_34222094-S        | NADP dependent leukotriene b4 12-            | 3460.2393 |
| 4980 | U92027_at-2_NA_illumina        | Human clone 61501 defective mariner          | 3460.2856 |
| 4981 | U92027_at_GI_40254927-S        | Clone 61501 defective mariner transposon     | 3460.2856 |
| 4982 | U48707_at_GI_21314649-S        | Protein phosphatase-1 inhibitor mRNA         | 3460.3015 |
| 4983 | X89960_at_NA_illumina          | Mitochondrial capsule selenoprotein          | 3460.4727 |
| 4984 | RC_AA411887_at_NA_illumina     | EST: zu01h02.s1 Soares testis NHT Homo       | 3460.504  |
| 4985 | U49240_at_NA_illumina          | Symplekin                                    | 3460.509  |
| 4986 | X04143_at_GI_41152108-S        | BGLAP Bone gamma-carboxyglutamate            | 3460.5452 |
| 4987 | U25041_at-2_NA_illumina        | Ribosomal protein, mitochondrial, L12        | 3460.6453 |
| 4988 | U25041_at_GI_27436900-S        | 5C5 mRNA, putative complete cds              | 3460.6453 |
| 4989 | AA417310_at_NA_illumina        | EST: zu07c02.r1 Soares testis NHT Homo       | 3460.738  |
| 4990 | RC_AA399554_at_GI_37550053-S   | EST: zt88c06.s1 Soares testis NHT Homo       | 3460.7988 |
| 4991 | RC_AA253175_at_NA_illumina     | EST: zr53d12.s1 Soares NhHMPu S1             | 3460.8074 |
| 4992 | S67247_s_at_NA_illumina        | Smooth muscle myosin heavy chain             | 3460.8816 |
| 4993 | AA479826_at_GI_4759111-S       | Solute carrier family 16 (monocarboxylic     | 3460.8967 |
| 4994 | RC_AA485055_at_GI_27262640-A   | Homo sapiens sperm flagellar protein         | 3460.952  |
| 4995 | RC_AA459950_at_NA_illumina     | EST: zx66b03.s1 Soares total fetus           | 3460.9763 |
| 4996 | X99325_at_GI_34147665-S        | Alpha-tubulin mRNA                           | 3461.0483 |
| 4997 | U49065_at_GI_28416901-S        | Interleukin-1 receptor-related protein       | 3461.089  |
| 4998 | U49065_at-2_NA_illumina        | Interleukin 1 receptor-like 2                | 3461.089  |
| 4999 | C00695_s_at_GI_4506960-S       | Survival of motor neuron protein interacting | 3461.1174 |
| 5000 | M94055_at_GI_10337596-S        | SODIUM CHANNEL PROTEIN, BRAIN II             | 3461.1472 |
| 5001 | L76571_at_GI_13259502-S        | Nuclear hormone receptor (shp) gene, 3'      | 3461.177  |
| 5002 | HG4517-HT4920_s_at_NA_illumina | Immunoglobulin Recombination Signal          | 3461.1887 |
| 5003 | AB002330_at_GI_37550558-S      | Human mRNA for KIAA0332 gene, partial        | 3461.197  |
| 5004 | U95044_i_at_NA_illumina        | Human zinc finger protein (FDZF2) mRNA,      | 3461.198  |
| 5005 | RC_AA032147_at_NA_illumina     | EST: zk18d09.s1 Soares pregnant uterus       | 3461.2039 |
| 5006 | U10886_at_NA_illumina          | Density enhanced phosphatase-1 mRNA          | 3461.2207 |
| 5007 | RC_AA243058_at_GI_13386491-S   | EST: zr24h08.s1 Stratagene NT2 neuronal      | 3461.2336 |
| 5008 | W36283_at_GI_14780901-S        | EST: HFBEST-60 Human fetal brain             | 3461.2493 |
| 5009 | AA036753_at_GI_20149636-S      | Calpastatin                                  | 3461.263  |
| 5010 | H29683_at_GI_22749084-S        | EST: ym61b06.r1 Homo sapiens cDNA            | 3461.3787 |
| 5011 | U49928_at_GI_5174702-I         | TAK1 binding protein 1 (TAB1) mRNA           | 3461.4563 |
| 5012 | X71355_s_at_NA_illumina        | Solute carrier family 17 (sodium             | 3461.522  |
| 5013 | AA504223_at_GI_21361251-S      | Chromosome-associated polypeptide C          | 3461.5266 |
| 5014 | N41669_at_NA_illumina          | EST: yw90d03.r1 Homo sapiens cDNA            | 3461.547  |
| 5015 | AA151887_at_GI_24475808-S      | KIAA0331 gene product                        | 3461.6804 |
| 5016 | RC_AA284691_at_GI_20336723-S   | EST: zt24a06.s1 Soares ovary tumor           | 3461.682  |
| 5017 | RC_AA460683_at_GI_28558972-S   | Chromosome X open reading frame 4            | 3461.7046 |
| 5018 | X75308_at_GI_13027796-S        | MMP13 Matrix metalloproteinase 13            | 3462.021  |
| 5019 | RC_AA609635_at_NA_illumina     | EST: af15h11.s1 Soares testis NHT Homo       | 3462.0479 |

|      |                              |                                           |           |
|------|------------------------------|-------------------------------------------|-----------|
| 5020 | AA490685_at_NA_illumina      | EST: aa45b03.r1 Soares NhHMPu S1          | 3462.1084 |
| 5021 | AA256106_at_GI_14042977-S    | EST: zs29c11.r1 NCI_CGAP_GCB1 Homo        | 3462.1113 |
| 5022 | R25253_at_GI_34222355-S      | Seven in absentia (Drosophila) homolog 2  | 3462.1685 |
| 5023 | L20860_at_GI_9945387-S       | Glycoprotein Ib beta mRNA                 | 3462.1838 |
| 5024 | U25956_at_GI_6031197-S       | SELPLG Selectin P ligand                  | 3462.1968 |
| 5025 | X17098_at_GI_7524013-S       | PSG6 Pregnancy-specific beta-1            | 3462.2869 |
| 5026 | U09278_at_GI_16933539-S      | Fibroblast activation protein mRNA        | 3462.3054 |
| 5027 | U62325_at_GI_27894365-S      | FE65-like protein (hFE65L) mRNA, partial  | 3462.3591 |
| 5028 | AA335018_at_NA_illumina      | EST: EST39611 Epididymus Homo             | 3462.402  |
| 5029 | AA096412_at_NA_illumina      | Dual-specificity tyrosine-(Y)-            | 3462.4602 |
| 5030 | M96956_at_GI_4507424-S       | TDGF1 Teratocarcinoma-derived growth      | 3462.4849 |
| 5031 | AA313786_at_NA_illumina      | EST: EST185649 Colon carcinoma (HCC)      | 3462.52   |
| 5032 | RC_AA292631_at_GI_37551403-S | EST: zs58g01.s1 NCI_CGAP_GCB1             | 3462.539  |
| 5033 | RC_AA001663_at_NA_illumina   | EST: zh85b09.s1 Soares fetal liver spleen | 3462.5417 |
| 5034 | RC_AA398617_at_GI_37547468-S | EST: zt74c07.s1 Soares testis NHT Homo    | 3462.5771 |
| 5035 | U16129_at_GI_4557630-S       | Glutamate receptor (GluR4) mRNA           | 3462.6355 |
| 5036 | W39069_at_NA_illumina        | EST: zb34d06.r1 Soares parathyroid tumor  | 3462.6824 |
| 5037 | H61937_at_GI_39995075-S      | EST: yr24d07.r1 Homo sapiens cDNA         | 3462.7603 |
| 5038 | L46353_at_GI_14141182-S      | High-mobility group phosphoprotein (HMGI- | 3462.8557 |
| 5039 | D13637_at_GI_41350336-S      | KIAA0012 gene                             | 3462.909  |
| 5040 | RC_AA400820_s_at_NA_illumina | EST: zu51d07.s1 Soares ovary tumor        | 3463.0483 |
| 5041 | AA156838_at_NA_illumina      | Human tumor susceptibility protein        | 3463.0723 |
| 5042 | RC_AA053267_at_NA_illumina   | Phosphate cytidylyltransferase 2,         | 3463.1458 |
| 5043 | AA203649_at_NA_illumina      | EST: zx58e12.r1 Soares fetal liver spleen | 3463.1467 |
| 5044 | AA504736_at_NA_illumina      | EST: aa63e01.r1 NCI_CGAP_GCB1             | 3463.3047 |
| 5045 | RC_AA019253_at_NA_illumina   | EST: ze56e09.s1 Soares retina N2b4HR      | 3463.306  |
| 5046 | RC_AA429649_at_GI_24308222-S | EST: zw71c09.s1 Soares testis NHT         | 3463.3193 |
| 5047 | U32315_at_GI_34147491-S      | Syntaxin 3 mRNA                           | 3463.3628 |
| 5048 | D49493_at_GI_11641417-S      | Bone morphogenetic protein-3b             | 3463.3894 |
| 5049 | RC_AA431981_at_GI_37545982-S | Homo sapiens clone 24741 mRNA             | 3463.3918 |
| 5050 | RC_AA179812_at_NA_illumina   | Human transcription factor NFATx mRNA,    | 3463.4397 |
| 5051 | RC_AA137073_at_NA_illumina   | EST: zl02g02.s1 Soares pregnant uterus    | 3463.4573 |
| 5052 | HG2417-HT2513_at_NA_illumina | Dynein, Heavy Chain, Cytoplasmic          | 3463.4612 |
| 5053 | AC002077_at_GI_22027519-A    | GUANINE NUCLEOTIDE-BINDING                | 3463.4705 |
| 5054 | U48436_s_at_NA_illumina      | FMR2 Fragile X mental retardation 2       | 3463.4907 |
| 5055 | M60094_rna1_at_GI_20544167-S | Testicular H1 histone (H1) gene           | 3463.5422 |
| 5056 | S65921_at_NA_illumina        | Anti-colorectal carcinoma light chain     | 3463.562  |
| 5057 | RC_AA243349_at_NA_illumina   | EST: zs15g03.s1 NCI_CGAP_GCB1             | 3463.5679 |
| 5058 | RC_AA417904_at_NA_illumina   | EST: zv05d05.s1 Soares NhHMPu S1          | 3463.5798 |
| 5059 | M99438_at_GI_4827029-S       | Transducin-like enhancer protein (TLE3)   | 3463.683  |
| 5060 | RC_AA454853_at_GI_11345491-S | EST: zx79e11.s1 Soares ovary tumor        | 3463.7078 |
| 5061 | S83366_cds3_at_NA_illumina   | Description: orf3 gene extracted from     | 3463.7544 |
| 5062 | M17219_at_GI_33946323-S      | GNAI1 Guanine nucleotide binding protein  | 3464.0093 |

|      |                               |                                           |           |
|------|-------------------------------|-------------------------------------------|-----------|
| 5063 | RC_AA019136_s_at_NA_illumina  | EST: ze58h09.s1 Soares retina N2b4HR      | 3464.0835 |
| 5064 | RC_AA253397_at_GI_14249657-S  | Homo sapiens clone 24659 mRNA             | 3464.11   |
| 5065 | M62397_at_GI_4505128-S        | MCC Mutated in colorectal cancers         | 3464.1355 |
| 5066 | RC_AA235985_at_NA_illumina    | EST: zs41g07.s1 Soares NhHMPu S1          | 3464.1414 |
| 5067 | U43408_at_GI_4507610-S        | Tyrosine kinase (Tnk1) mRNA               | 3464.1436 |
| 5068 | U63329_at_GI_6912519-S        | MutY homolog (hMYH) gene                  | 3464.1729 |
| 5069 | W88830_at_NA_illumina         | Homo sapiens torsinB (DQ1) mRNA,          | 3464.1855 |
| 5070 | AA187037_at_NA_illumina       | EST: zp58e04.r1 Stratagene endothelial    | 3464.2368 |
| 5071 | M87313_s_at_NA_illumina       | DM Dystrophia myotonica (includes         | 3464.3843 |
| 5072 | Z32684_at_GI_18860914-S       | XK mRNA for membrane transport protein    | 3464.4355 |
| 5073 | H66988_at_NA_illumina         | EST: yu17c10.r1 Homo sapiens cDNA         | 3464.456  |
| 5074 | Z46967_at_GI_17738311-S       | Calicin (partial)                         | 3464.4792 |
| 5075 | S81944_at-2_NA_illumina       | Gamma-aminobutyric acid (GABA) A          | 3464.4927 |
| 5076 | S81944_at_GI_4557606-S        | GABRA6 Gamma-aminobutyric acid            | 3464.4927 |
| 5077 | D16350_at_NA_illumina         | SA mRNA for SA gene product               | 3464.5242 |
| 5078 | R86178_at_GI_21166360-S       | EST: yp88f07.r1 Homo sapiens cDNA         | 3464.605  |
| 5079 | RC_AA293194_s_at_GI_7662491-S | EST: zt25g11.s1 Soares ovary tumor        | 3464.6138 |
| 5080 | J04076_at_GI_9845523-S        | EGR2 Early growth response 2 (Krox-20     | 3464.681  |
| 5081 | C01778_s_at_NA_illumina       | EST: HUMGS0003730, Human Gene             | 3464.8347 |
| 5082 | U32499_s_at_NA_illumina       | D3 dopamine receptor mRNA                 | 3464.85   |
| 5083 | L15388_at_GI_4885348-S        | G PROTEIN-COUPLED RECEPTOR                | 3465.0256 |
| 5084 | D83885_at_NA_illumina         | Tumor protein D52-like 2                  | 3465.0564 |
| 5085 | L25286_s_at_GI_18641349-S     | COL15A1 Collagen, type XV, alpha 1        | 3465.0916 |
| 5086 | U35735_at_GI_7706676-S        | RACH1 (RACH1) mRNA                        | 3465.1667 |
| 5087 | L27559_s_at_GI_10834981-S     | IGFBP5 Insulin-like growth factor binding | 3465.1704 |
| 5088 | RC_AA447587_at_NA_illumina    | EST: zw82b07.s1 Soares testis NHT         | 3465.1733 |
| 5089 | M74161_at_GI_37547093-S       | 75 KD INOSITOL-1,4,5-TRISPHOSPHATE        | 3465.2146 |
| 5090 | RC_AA521295_at_NA_illumina    | EST: aa79e10.s1 NCI_CGAP_GCB1             | 3465.3054 |
| 5091 | W73859_at_GI_38202236-A       | Transcription factor 21                   | 3465.3071 |
| 5092 | M20543_at_GI_5016087-S        | ACTA1 Actin, alpha 1, skeletal muscle     | 3465.3074 |
| 5093 | RC_AA412284_s_at_GI_19923371- | Human poliovirus receptor mRNA, clone     | 3465.3394 |
| 5094 | U66726_s_at_NA_illumina       | Testis specific RNA binding protein       | 3465.389  |
| 5095 | W60965_at_NA_illumina         | EST: zd30c02.r1 Soares fetal heart        | 3465.3975 |
| 5096 | RC_AA005202_at_NA_illumina    | PLASMA RETINOL-BINDING PROTEIN            | 3465.4124 |
| 5097 | X87871_s_at_NA_illumina       | HEPATOCTE NUCLEAR FACTOR 4                | 3465.5098 |
| 5098 | RC_AA418565_at_NA_illumina    | EST: zv93d10.s1 Soares NhHMPu S1          | 3465.634  |
| 5099 | U59286_at_GI_14790145-S       | Beta-R1 mRNA, partial cds                 | 3465.6365 |
| 5100 | U59286_at-2_NA_illumina       | Homo sapiens interferon stimulated T-cell | 3465.6365 |
| 5101 | RC_D59316_f_at_GI_45333882-S  | EST: Human fetal brain cDNA 3'-end GEN-   | 3465.6426 |
| 5102 | RC_AA235993_at_NA_illumina    | EST: zs41h05.s1 Soares NhHMPu S1          | 3465.6602 |
| 5103 | X68090_s_at_NA_illumina       | Fc-gamma-RIIA gene for IgG Fc receptor    | 3465.6733 |
| 5104 | RC_AA421328_at_GI_6005955-S   | EST: zu27d04.s1 Soares ovary tumor        | 3465.7744 |
| 5105 | X54150_at_GI_19743872-A       | FCAR Fc fragment of IgA, receptor for     | 3465.8162 |

|      |                              |                                              |           |
|------|------------------------------|----------------------------------------------|-----------|
| 5106 | RC_AA476251_at_NA_illumina   | EST: zw44g01.s1 Soares total fetus           | 3465.9543 |
| 5107 | R19008_at_GI_31881797-S      | Yg26d09.r1 Homo sapiens cDNA clone           | 3465.9646 |
| 5108 | T35288_at_NA_illumina        | EST: EST82450 Homo sapiens cDNA 5'           | 3465.999  |
| 5109 | T84780_at_NA_illumina        | EST: yd51d04.r1 Homo sapiens cDNA            | 3466.052  |
| 5110 | W29077_at_NA_illumina        | EST: 56a9 Human retina cDNA randomly         | 3466.095  |
| 5111 | RC_AA152232_at_NA_illumina   | EST: zo04c10.s1 Stratagene endothelial       | 3466.1255 |
| 5112 | U16997_at_GI_19743908-S      | Orphan receptor ROR gamma mRNA               | 3466.1355 |
| 5113 | Y07707_at_NA_illumina        | RPLP0 Ribosomal protein, large, P0           | 3466.139  |
| 5114 | Z48051_rna1_at_GI_45545416-S | Myelin oligodendrocyte glycoprotein          | 3466.2092 |
| 5115 | D50495_at_GI_38505154-A      | Transcription elongation factor S-II, hS-II- | 3466.2534 |
| 5116 | RC_AA488878_at_NA_illumina   | EST: aa55f02.s1 NCI_CGAP_GCB1 Homo           | 3466.2546 |
| 5117 | M37238_s_at_GI_4505870-S     | PLCG2 Phospholipase C, gamma 2               | 3466.3142 |
| 5118 | W28545_at_NA_illumina        | EST: 48c7 Human retina cDNA randomly         | 3466.3171 |
| 5119 | AA281696_at_NA_illumina      | Human MDA-7 (mda-7) mRNA, complete           | 3466.3438 |
| 5120 | H69440_at_NA_illumina        | EST: yr88c02.r1 Homo sapiens cDNA            | 3466.3462 |
| 5121 | U52373_s_at_NA_illumina      | Serine/threonine protein kinase              | 3466.3489 |
| 5122 | M86849_at_GI_31341566-S      | Connexin 26 (GJB2) mRNA                      | 3466.4272 |
| 5123 | M85220_at_NA_illumina        | Germline Ig alpha mutant chain gene C-       | 3466.507  |
| 5124 | U44798_s_at_NA_illumina      | Human U1-snRNP binding protein               | 3466.5703 |
| 5125 | RC_AA452411_at_GI_28558968-A | EST: zx31f05.s1 Soares total fetus           | 3466.6375 |
| 5126 | U09646_at_GI_4503022-S       | Carnitine palmitoyltransferase (CPT1)        | 3466.6733 |
| 5127 | U84487_at_GI_4506856-S       | CX3C chemokine precursor, mRNA,              | 3466.709  |
| 5128 | RC_AA136240_at_NA_illumina   | EST: zk93h04.s1 Soares pregnant uterus       | 3466.754  |
| 5129 | Y07512_at_GI_10835241-S      | CGMP-DEPENDENT PROTEIN KINASE,               | 3466.7542 |
| 5130 | X05246_at_GI_31543396-S      | Testis-specific PGK-2 gene for               | 3466.772  |
| 5131 | X83572_at_GI_4502238-A       | ARSD Arylsulfatase D                         | 3466.8025 |
| 5132 | L07738_at_GI_22027542-S      | DIHYDROPRYRIDINE-SENSITIVE L-                | 3466.8125 |
| 5133 | Z71389_at_GI_13124885-S      | Skin-antimicrobial-peptide 1 (SAP1)          | 3466.873  |
| 5134 | X54131_at_GI_18491009-S      | PTPRB Protein tyrosine phosphatase,          | 3466.8906 |
| 5135 | RC_AA442883_at_NA_illumina   | EST: zv60g03.s1 Soares testis NHT Homo       | 3467.0654 |
| 5136 | W26845_at_NA_illumina        | Homo sapiens mRNA for KIAA0914               | 3467.0693 |
| 5137 | L07919_at_GI_6996003-S       | Homeodomain protein DLX-2 mRNA, 3'           | 3467.0884 |
| 5138 | RC_AA621169_at_GI_11038658-A | EST: af61h05.s1 Soares NhHMPu S1             | 3467.1487 |
| 5139 | X05299_at_GI_26105977-S      | CENPB Centromere protein B (80kD)            | 3467.1719 |
| 5140 | X87176_at_GI_4504504-S       | 17-beta-hydroxysteroid dehydrogenase         | 3467.2725 |
| 5141 | D17570_s_at_GI_5902115-S     | Zona-pellucida-binding protein (sp38)        | 3467.3276 |
| 5142 | D17570_s_at-2_NA_illumina    | Human mRNA for zona-pellucida-binding        | 3467.3276 |
| 5143 | RC_AA490965_at_NA_illumina   | EST: aa48f12.s1 NCI_CGAP_GCB1 Homo           | 3467.3372 |
| 5144 | RC_AA416538_at_GI_21362045-S | EST: zu05b09.s1 Soares testis NHT Homo       | 3467.3782 |
| 5145 | AA090516_at_GI_21359892-S    | EST: y0696.seq.F Fetal heart, Lambda         | 3467.3801 |
| 5146 | X81636_at_NA_illumina        | Clathrin light chain a gene                  | 3467.4639 |
| 5147 | RC_AA402984_at_GI_37537720-S | EST: zu55b08.s1 Soares ovary tumor           | 3467.7375 |
| 5148 | RC_AA443667_at_GI_14149674-S | EST: zw86b07.s1 Soares total fetus           | 3467.7432 |



|      |                              |                                           |           |
|------|------------------------------|-------------------------------------------|-----------|
| 5149 | X99350_rna1_at_GI_4557023-S  | HFH4_cds gene extracted from H.sapiens    | 3467.843  |
| 5150 | X99350_rna1_at-2_NA_illumina | Forkhead (Drosophila)-like 13             | 3467.843  |
| 5151 | L44542_at_NA_illumina        | EST: Homo sapiens thymus mRNA             | 3467.8782 |
| 5152 | U79248_at_GI_42661344-S      | Clone 23826 mRNA sequence                 | 3467.9397 |
| 5153 | S81578_at_NA_illumina        | Dioxin-responsive gene {putative          | 3467.979  |
| 5154 | HG2460-HT2556_at_NA_illumina | Integrin Beta 1 (Gb:M34189)               | 3468.021  |
| 5155 | M16505_at_GI_13162281-S      | STS Steroid sulfatase (microsomal)        | 3468.038  |
| 5156 | J05037_at_GI_33469957-S      | L-SERINE DEHYDRATASE                      | 3468.0537 |
| 5157 | U84569_at_GI_4826650-S       | YF5 mRNA                                  | 3468.0833 |
| 5158 | U84569_at-2_NA_illumina      | Chromosome 21 open reading frame 2        | 3468.0833 |
| 5159 | RC_AA004353_at_GI_15208630-S | EST: zh91h05.s1 Soares fetal liver spleen | 3468.1392 |
| 5160 | AA452625_at_NA_illumina      | Iduronate 2-sulfatase (Hunter syndrome)   | 3468.2146 |
| 5161 | S62696_s_at_NA_illumina      | EBV/C3d receptor {alternatively spliced,  | 3468.2798 |
| 5162 | U97188_at_GI_30795211-S      | Putative RNA binding protein KOC (koc)    | 3468.3054 |
| 5163 | RC_AA136572_at_NA_illumina   | Caldesmon 1                               | 3468.423  |
| 5164 | N76208_at_GI_11641302-S      | EST: yv37b01.r1 Soares fetal liver spleen | 3468.4832 |
| 5165 | U49187_at_GI_14277689-S      | Placenta (Diff48) mRNA                    | 3468.5164 |
| 5166 | U59309_at_GI_19743874-S      | FH Fumarate hydratase                     | 3468.5183 |
| 5167 | U14407_at-2_NA_illumina      | Interleukin 15                            | 3468.6665 |
| 5168 | U14407_at_GI_26787979-A      | IL15 Interleukin 15                       | 3468.6665 |
| 5169 | RC_AA047365_at_NA_illumina   | EST: zk78a05.s1 Soares pregnant uterus    | 3468.7659 |
| 5170 | X04445_rna1_s_at_NA_illumina | InhA gene exon 1 (and joined CDS)         | 3468.7734 |
| 5171 | L07044_at_GI_26667190-A      | Calcium/calmodulin-dependent protein      | 3468.8235 |
| 5172 | RC_AA054726_at_GI_37551946-S | EST: zk68e06.s1 Soares pregnant uterus    | 3468.8496 |
| 5173 | S82185_at_NA_illumina        | Escherichia coli unknown mRNA             | 3469.0112 |
| 5174 | X77922_s_at_NA_illumina      | SIAT8 Sialyltransferase 8 (alpha-N-       | 3469.0203 |
| 5175 | H05559_at_NA_illumina        | EST: yl75c08.r1 Homo sapiens cDNA         | 3469.0508 |
| 5176 | M91556_s_at_GI_4506810-S     | SCN6A Sodium channel, voltage-gated,      | 3469.0547 |
| 5177 | M91556_s_at-2_NA_illumina    | Sodium channel, voltage-gated, type VI,   | 3469.0547 |
| 5178 | U86755_s_at_NA_illumina      | TNF-alpha converting enzyme mRNA          | 3469.0566 |
| 5179 | J00214_f_at_NA_illumina      | Messenger RNA for human leukocyte         | 3469.0593 |
| 5180 | RC_AA448663_at_NA_illumina   | EST: zx10e03.s1 Soares total fetus        | 3469.0728 |
| 5181 | C14485_s_at_NA_illumina      | EST: Human fetal brain cDNA 5'-end GEN-   | 3469.1013 |
| 5182 | H25982_at_NA_illumina        | EST: yl56g01.r1 Homo sapiens cDNA         | 3469.1208 |
| 5183 | AA203548_at_GI_5453558-S     | Homo sapiens F1FO-type ATPase subunit     | 3469.1248 |
| 5184 | RC_AA279012_at_NA_illumina   | EST: zs81a05.s1 NCI_CGAP_GCB1             | 3469.1453 |
| 5185 | R08272_at_NA_illumina        | Ribosomal protein L14                     | 3469.325  |
| 5186 | M37815_cds1_at_GI_5453610-S  | CD28 gene (glycoprotein CD28) extracted   | 3469.4192 |
| 5187 | RC_AA019847_at_NA_illumina   | EST: ze60h01.s1 Soares retina N2b4HR      | 3469.422  |
| 5188 | U12897_at_NA_illumina        | Non-translated mRNA sequence              | 3469.4238 |
| 5189 | U67191_at_GI_4758317-S       | Multiple exostosis-like protein (EXTL)    | 3469.5813 |
| 5190 | M55284_at_GI_28557780-S      | Protein kinase C-L (PRKCL) mRNA           | 3469.582  |
| 5191 | R46311_at_NA_illumina        | EST: yj53f04.r1 Homo sapiens cDNA clone   | 3469.605  |

|      |                               |                                            |           |
|------|-------------------------------|--------------------------------------------|-----------|
| 5192 | M31642_at_GI_4504482-S        | HPRT1 Hypoxanthine                         | 3469.7285 |
| 5193 | M29458_at_GI_6996001-S        | CARBONIC ANHYDRASE III                     | 3469.805  |
| 5194 | M21642_s_at_NA_illumina       | ANTITHROMBIN-III PRECURSOR                 | 3469.8328 |
| 5195 | U22028_at_GI_19743563-S       | Cytochrome P450 (CYP2A13) gene             | 3469.8396 |
| 5196 | AA481617_at_NA_illumina       | Cell division cycle 2, G1 to S and G2 to M | 3469.8489 |
| 5197 | AA085059_at_NA_illumina       | Zn14b01.r1 Stratagene hNT neuron           | 3469.9692 |
| 5198 | D42044_at_GI_22095330-S       | KIAA0090 gene, partial cds                 | 3470.0017 |
| 5199 | L76927_rna1_at_GI_4503894-S   | Galactokinase (GALK1) gene                 | 3470.042  |
| 5200 | AA477031_at_NA_illumina       | EST: zu38c01.r1 Soares ovary tumor         | 3470.0522 |
| 5201 | U73394_f_at_NA_illumina       | H.sapiens mRNA for NK receptor, clone      | 3470.0962 |
| 5202 | RC_AA436619_at_NA_illumina    | EST: zw55d04.s1 Soares total fetus         | 3470.115  |
| 5203 | U43279_at_NA_illumina         | Nucleoporin nup 36 mRNA                    | 3470.178  |
| 5204 | U23070_at_GI_6912533-S        | Putative transmembrane protein (nma)       | 3470.1985 |
| 5205 | RC_AA488181_s_at_GI_4507060-S | Slit (Drosophila) homolog 1                | 3470.2417 |
| 5206 | N31684_at_GI_41872532-A       | Neuropilin 2                               | 3470.2417 |
| 5207 | W38226_s_at_NA_illumina       | No info for gene                           | 3470.3408 |
| 5208 | L14927_at_GI_32455234-S       | LCN1 Lipocalin 1 (protein migrating faster | 3470.3416 |
| 5209 | X05451_s_at_NA_illumina       | MYOSIN LIGHT CHAIN 3, SKELETAL             | 3470.4084 |
| 5210 | M83712_s_at_GI_33589826-S     | CHRNA5 Cholinergic receptor, nicotinic,    | 3470.4417 |
| 5211 | U05012_s_at_NA_illumina       | NTRK3 Neurotrophic tyrosine kinase,        | 3470.4487 |
| 5212 | RC_AA236249_s_at_NA_illumina  | EST: zr51f04.s1 Soares NhHMPu S1           | 3470.5376 |
| 5213 | T50576_at_NA_illumina         | EST: yb76c11.r1 Homo sapiens cDNA          | 3470.5586 |
| 5214 | AA331247_at_NA_illumina       | EST: EST35325 Embryo, 8 week I Homo        | 3470.5684 |
| 5215 | AA090842_at_NA_illumina       | EST: yy0444.seq.F Fetal heart, Lambda      | 3470.5764 |
| 5216 | M26665_at_GI_4557652-S        | HISTATIN 3 PRECURSOR                       | 3470.614  |
| 5217 | AA287815_at_GI_9506436-S      | EST: zs50g04.r1 NCI_CGAP_GCB1 Homo         | 3470.6814 |
| 5218 | RC_AA002140_at_NA_illumina    | EST: ze49b05.s1 Soares retina N2b4HR       | 3470.6885 |
| 5219 | U33761_at_GI_16306593-A       | Cyclin A/CDK2-associated p45 (Skp2)        | 3470.8674 |
| 5220 | L12760_s_at_NA_illumina       | PHOSPHOENOLPYRUVATE                        | 3470.8796 |
| 5221 | RC_AA429356_at_NA_illumina    | EST: zv50g09.s1 Soares ovary tumor         | 3470.9224 |
| 5222 | L11353_at_GI_32967513-A       | NF2 Neurofibromin 2 (bilateral acoustic    | 3470.9773 |
| 5223 | AF000574_s_at_NA_illumina     | Homo sapiens monocyte/macrophage Ig-       | 3470.9783 |
| 5224 | RC_AA446587_at_NA_illumina    | EST: zw84e01.s1 Soares total fetus         | 3471.046  |
| 5225 | H13654_at_NA_illumina         | EST: yj07f10.r1 Homo sapiens cDNA clone    | 3471.0676 |
| 5226 | L40371_at_GI_32189375-S       | Thyroid receptor interactor (TRIP4) mRNA,  | 3471.1057 |
| 5227 | RC_AA262587_at_NA_illumina    | EST: zs22d03.s1 NCI_CGAP_GCB1              | 3471.1077 |
| 5228 | HG544-HT544_at_NA_illumina    | Endothelial Cell Growth Factor 1           | 3471.2214 |
| 5229 | RC_AA437323_at_GI_14149901-S  | EST: zv62f11.s1 Soares testis NHT Homo     | 3471.237  |
| 5230 | M19309_s_at_GI_39930526-S     | TNNT1 Troponin T1, skeletal, slow          | 3471.243  |
| 5231 | AA431398_at_GI_22035593-A     | EST: zw76d12.r1 Soares testis NHT Homo     | 3471.2444 |
| 5232 | AA504595_at_GI_37537718-S     | EST: aa60g12.r1 NCI_CGAP_GCB1              | 3471.3286 |
| 5233 | X00090_f_at_GI_21396498-S     | Histone H3 gene                            | 3471.3958 |
| 5234 | RC_AA401378_at_GI_22094986-S  | EST: zu63e10.s1 Soares testis NHT Homo     | 3471.521  |

|      |                              |                                           |           |
|------|------------------------------|-------------------------------------------|-----------|
| 5235 | R59464_at_GI_31791048-S      | EST: yh17h08.r1 Homo sapiens cDNA         | 3471.5244 |
| 5236 | H03229_at_NA_illumina        | EST: yj47g07.r1 Homo sapiens cDNA         | 3471.5508 |
| 5237 | U71207_at_GI_26667229-A      | Eyes absent homolog (Eab1) mRNA           | 3471.6038 |
| 5238 | U37529_at_NA_illumina        | TAC2 Tachykinin 2 (substance K,           | 3471.7764 |
| 5239 | AA431505_at_GI_42734307-S    | Homo sapiens mRNA for putative Sqv-7-     | 3471.8025 |
| 5240 | W49490_at_NA_illumina        | EST: zc42e10.r1 Soares senescent          | 3471.8364 |
| 5241 | U57452_at_NA_illumina        | SNF1-like protein kinase mRNA, partial    | 3471.885  |
| 5242 | AA211295_at_NA_illumina      | Zq87g01.r1 Stratagene hNT neuron          | 3471.985  |
| 5243 | H46074_at_NA_illumina        | EST: yo13f07.r1 Homo sapiens cDNA         | 3472.066  |
| 5244 | L19593_at_GI_29171680-S      | IL8RB Interleukin 8 receptor, beta        | 3472.0688 |
| 5245 | AA248747_at_NA_illumina      | EST: hp0672.seq.F Human fetal heart,      | 3472.0789 |
| 5246 | AA292809_at_NA_illumina      | Xeroderma pigmentosum,                    | 3472.139  |
| 5247 | H43244_at_GI_31652256-S      | EST: yp05e06.r1 Homo sapiens cDNA         | 3472.1663 |
| 5248 | U79115_s_at_GI_22265328-S    | Death adaptor molecule RAIDD (RAIDD)      | 3472.1824 |
| 5249 | RC_AA075666_at_NA_illumina   | EST: zm88e09.s1 Stratagene ovarian        | 3472.1873 |
| 5250 | RC_AA215643_at_GI_20127585-S | EST: zr98d05.s1 NCI_CGAP_GCB1 Homo        | 3472.1946 |
| 5251 | AA355789_at_GI_13376141-S    | EST: EST64243 Jurkat T-cells VI Homo      | 3472.2358 |
| 5252 | U65745_at_NA_illumina        | Bos taurus carnitine octanoyltransferase  | 3472.333  |
| 5253 | M16967_at_GI_10518500-S      | F5 Coagulation factor V                   | 3472.3965 |
| 5254 | AA425053_at_NA_illumina      | EST: zw06e03.r1 Soares NhHMPu S1          | 3472.405  |
| 5255 | AA431603_at_NA_illumina      | EST: zw70c11.r1 Soares testis NHT Homo    | 3472.4236 |
| 5256 | RC_AA599090_at_GI_13376797-S | EST: ae51f09.s1 Stratagene lung           | 3472.4321 |
| 5257 | X64624_s_at_NA_illumina      | HOMEBOX/POU DOMAIN PROTEIN                | 3472.4963 |
| 5258 | RC_AA399047_at_NA_illumina   | EST: zt87e08.s1 Soares testis NHT Homo    | 3472.553  |
| 5259 | M37981_at_GI_19923121-S      | CHRNA3 Alpha-3 neuronal nicotinic         | 3472.555  |
| 5260 | RC_AA233511_at_GI_4757849-S  | Homo sapiens mitoxantrone resistance      | 3472.6165 |
| 5261 | X84213_s_at_NA_illumina      | Bak protein mRNA                          | 3472.6394 |
| 5262 | U14910_at_GI_21361328-S      | RPE-retinal G protein-coupled receptor    | 3472.6755 |
| 5263 | X53390_s_at_GI_7657670-S     | NUCLEOLAR TRANSCRIPTION FACTOR            | 3472.6836 |
| 5264 | R20168_at_NA_illumina        | EST: yg33c02.r1 Homo sapiens cDNA         | 3472.8171 |
| 5265 | HG2239-HT2324_at_NA_illumina | Potassium Channel Protein (Gb:Z11585)     | 3472.8472 |
| 5266 | X55283_rna1_s_at_NA_illumina | Asialoglycoprotein receptor 2             | 3472.8672 |
| 5267 | RC_AA010617_at_NA_illumina   | EST: zi09f12.s1 Soares fetal liver spleen | 3472.9292 |
| 5268 | X66358_at_GI_37596296-S      | mRNA KKIALLRE for serine/threonine        | 3472.9758 |
| 5269 | W27099_at_GI_38016921-A      | EST: 20c4 Human retina cDNA randomly      | 3472.9792 |
| 5270 | H30201_at_GI_8922930-S       | EST: yp41c12.r1 Homo sapiens cDNA         | 3473.0317 |
| 5271 | RC_AA490069_at_NA_illumina   | EST: ab05d09.s1 Stratagene fetal retina   | 3473.055  |
| 5272 | M98528_at_GI_36951161-S      | BRAIN NEURON CYTOPLASMIC                  | 3473.075  |
| 5273 | U23736_s_at_NA_illumina      | GATA-3 binding protein G3B mRNA,          | 3473.112  |
| 5274 | U23736_s_at-2_NA_illumina    | Human zinc finger protein RIZ mRNA,       | 3473.112  |
| 5275 | D64154_at_GI_28373193-A      | Mr 110,000 antigen                        | 3473.1714 |
| 5276 | S82769_at_GI_15193297-S      | GABAA receptor gamma 3 subunit            | 3473.1724 |
| 5277 | RC_AA022476_at_GI_40254944-S | EST: ze70c08.s1 Soares fetal heart        | 3473.1724 |

|      |                               |                                           |           |
|------|-------------------------------|-------------------------------------------|-----------|
| 5278 | X54199_s_at_GI_28416898-A     | PHOSPHORIBOSYLAMINE--GLYCINE              | 3473.181  |
| 5279 | M36653_s_at_NA_illumina       | POU2F2 POU domain, class 2,               | 3473.195  |
| 5280 | U92457_s_at_GI_4504140-S      | Metabotropic glutamate receptor 4 mRNA    | 3473.1963 |
| 5281 | J04810_s_at_GI_4505248-S      | MSH3 MutS (E. coli) homolog 3             | 3473.2188 |
| 5282 | M28249_at_GI_6006008-S        | ITGA2 Integrin, alpha 2 (CD49B, alpha 2   | 3473.2258 |
| 5283 | U46569_at_GI_4502182-S        | Aquaporin-5 (AQP5) gene                   | 3473.2573 |
| 5284 | U87309_at_GI_18105060-A       | HVps41p (HVPS41) mRNA                     | 3473.2996 |
| 5285 | U87309_at-2_NA_illumina       | Human hVps41p (HVPS41) mRNA,              | 3473.2996 |
| 5286 | M30607_s_at_GI_33239439-S     | TDF Zinc finger protein Y-linked (ZFY)    | 3473.3064 |
| 5287 | X97675_rna1_at_GI_4758931-S   | Plakophilin 2a gene extracted from        | 3473.3262 |
| 5288 | N57190_at_NA_illumina         | H.sapiens Xq28, 2000bp sequence contg.    | 3473.348  |
| 5289 | AA236771_at_GI_22218344-S     | EST: zr99e10.r1 NCI_CGAP_GCB1 Homo        | 3473.365  |
| 5290 | U52682_at_NA_illumina         | IRF4 Interferon regulatory factor 4       | 3473.3997 |
| 5291 | R10770_at_GI_31542698-S       | EST: yf36a08.r1 Homo sapiens cDNA         | 3473.403  |
| 5292 | M94077_at_GI_4557724-S        | LOR Loricrin                              | 3473.4702 |
| 5293 | HG4128-HT4398_at_NA_illumina  | Anion Exchanger 3, Cardiac Isoform        | 3473.4773 |
| 5294 | Z20777_at_NA_illumina         | EST: H. sapiens putatively transcribed    | 3473.4814 |
| 5295 | AA279723_at_GI_21361283-S     | Homo sapiens 30kDa splicing factor        | 3473.594  |
| 5296 | X60104_s_at_GI_4503494-S      | EGR4 Early growth response 4              | 3473.6968 |
| 5297 | U21943_at_GI_19913400-A       | Organic anion transporting polypeptide    | 3473.7292 |
| 5298 | U30313_at_GI_22219466-A       | Diadenosine tetraphosphatase mRNA         | 3473.8455 |
| 5299 | RC_AA022590_at_GI_37545931-S  | EST: ze72c10.s1 Soares fetal heart        | 3473.8914 |
| 5300 | U33203_s_at_NA_illumina       | Mdm2-E (mdm2) mRNA                        | 3473.993  |
| 5301 | RC_AA278838_s_at_GI_13376577- | EST: zs80g10.s1 NCI_CGAP_GCB1             | 3474.0408 |
| 5302 | U20536_s_at_GI_14916484-A     | Cysteine protease Mch2 isoform alpha      | 3474.132  |
| 5303 | U33202_s_at_NA_illumina       | Mdm2-D (mdm2) mRNA                        | 3474.1663 |
| 5304 | X51954_at_NA_illumina         | UCP gene for uncoupling protein exon 5    | 3474.1987 |
| 5305 | R39467_f_at_GI_41393581-S     | EST: yh95a09.r1 Homo sapiens cDNA         | 3474.2102 |
| 5306 | X81836_s_at_GI_4557472-S      | Dents Disease candidate gene              | 3474.2205 |
| 5307 | RC_AA425100_at_GI_45267831-S  | EST: zw07b03.s1 Soares NhHMPu S1          | 3474.2366 |
| 5308 | L37362_at_GI_39725939-S       | OPRK1 Opioid receptor, kappa 1            | 3474.244  |
| 5309 | L37362_at-2_NA_illumina       | Opioid receptor, kappa 1                  | 3474.244  |
| 5310 | Z80779_at_GI_21396482-S       | H2B/g gene                                | 3474.2737 |
| 5311 | D90282_at_GI_21361330-S       | CPS1 Carbamoyl-phosphate synthetase 1,    | 3474.2754 |
| 5312 | RC_AA056557_at_NA_illumina    | EST: zk81d06.s1 Soares pregnant uterus    | 3474.2944 |
| 5313 | RC_AA251297_at_GI_22748852-S  | EST: zs10a10.s1 NCI_CGAP_GCB1             | 3474.3801 |
| 5314 | X13955_s_at_GI_17921996-S     | MYL4 Myosin, light polypeptide 4, alkali; | 3474.3862 |
| 5315 | S82362_s_at_NA_illumina       | HRAR- beta 2=retinoic-acid-receptor       | 3474.3894 |
| 5316 | RC_AA281426_at_NA_illumina    | Natural resistance-associated macrophage  | 3474.434  |
| 5317 | S67070_at_GI_32306514-S       | Heat shock protein HSP72 homolog          | 3474.5356 |
| 5318 | N75646_at_NA_illumina         | EST: yv29a08.r1 Homo sapiens cDNA         | 3474.5771 |
| 5319 | RC_AA280687_at_GI_13435374-A  | EST: zs95h08.s1 NCI_CGAP_GCB1             | 3474.5874 |
| 5320 | Z22865_at_GI_32307171-S       | DPT Dermatopontin                         | 3474.6052 |

|      |                                |                                             |           |
|------|--------------------------------|---------------------------------------------|-----------|
| 5321 | U79293_at_NA_illumina          | Clone 23948 mRNA sequence                   | 3474.6968 |
| 5322 | RC_AA406573_at_NA_illumina     | EST: zv11b09.s1 Soares NhHMPu S1            | 3474.7073 |
| 5323 | RC_AA011441_at_NA_illumina     | EST: zi03a02.s1 Soares fetal liver spleen   | 3474.86   |
| 5324 | AA449863_at_GI_41327720-S      | EST: zx37b04.r1 Soares total fetus          | 3474.861  |
| 5325 | RC_AA219548_at_GI_30581159-S   | EST: zq99b03.s1 Stratagene NT2              | 3474.8997 |
| 5326 | S67970_at_GI_41152069-S        | ZNF75                                       | 3474.9246 |
| 5327 | U39196_at_GI_24797139-S        | G protein-activated inwardly rectifying     | 3474.9446 |
| 5328 | RC_AA464689_at_NA_illumina     | EST: zx82a03.s1 Soares ovary tumor          | 3474.9492 |
| 5329 | AA424199_at_GI_7705778-S       | EST: zv81e01.r1 Soares total fetus          | 3474.9563 |
| 5330 | R77200_at_NA_illumina          | EST: yi65g05.r1 Homo sapiens cDNA           | 3474.959  |
| 5331 | RC_AA423832_at_NA_illumina     | EST: zv79a04.s1 Soares total fetus          | 3474.9827 |
| 5332 | X95715_at_GI_6715560-S         | Anthracycline resistance associated         | 3475.0032 |
| 5333 | AA149520_at_NA_illumina        | Homo sapiens clone 192 Rer1 mRNA,           | 3475.0059 |
| 5334 | U83117_at_NA_illumina          | Ubiquitin-homology domain protein PIC1      | 3475.0613 |
| 5335 | W27256_at_NA_illumina          | Homo sapiens mRNA for putative RING         | 3475.18   |
| 5336 | RC_AA608718_at_GI_31343354-S   | EST: ae56d09.s1 Stratagene lung             | 3475.185  |
| 5337 | HG1686-HT4572_s_at_NA_illumina | Transcription Factor E4tf1, Respiratory,    | 3475.205  |
| 5338 | AA046737_at_NA_illumina        | EST: zf48a10.r1 Soares retina N2b4HR        | 3475.2634 |
| 5339 | RC_AA053021_at_GI_4759067-S    | SCO1 (yeast homolog) cytochrome             | 3475.2666 |
| 5340 | AA478674_at_GI_8923863-S       | EST: zv19f08.r1 Soares NhHMPu S1            | 3475.3472 |
| 5341 | U51477_at_GI_41872506-A        | Diacylglycerol kinase zeta mRNA             | 3475.3748 |
| 5342 | Z34975_at_GI_6678675-S         | LDLC mRNA                                   | 3475.417  |
| 5343 | W20514_at_NA_illumina          | EST: zb26f06.r1 Soares fetal lung           | 3475.4868 |
| 5344 | RC_AA035159_at_NA_illumina     | EST: zk27b12.s1 Soares pregnant uterus      | 3475.5232 |
| 5345 | D31184_at_GI_13129091-S        | EST: Human fetal-lung cDNA 5'-end           | 3475.5312 |
| 5346 | X52228_at_NA_illumina          | MUC1 Mucin 1, transmembrane                 | 3475.5771 |
| 5347 | HG4099-HT4369_s_at_NA_illumina | Adrenergic Receptor, Alpha 1b               | 3475.6147 |
| 5348 | U59289_at_GI_16507956-S        | H-cadherin mRNA                             | 3475.6438 |
| 5349 | RC_AA037357_r_at_NA_illumina   | EST: zc03c04.s1 Soares parathyroid          | 3475.6616 |
| 5350 | S67156_at_GI_4557334-S         | ASPA Aspartoacylase (aminoacylase 2,        | 3475.7046 |
| 5351 | X79483_at_GI_6006038-S         | ERK6 mRNA for extracellular signal          | 3475.7053 |
| 5352 | RC_AA411621_at_NA_illumina     | EST: zv23f05.s1 Soares NhHMPu S1            | 3475.8088 |
| 5353 | M17466_at_GI_9961354-S         | F12 Coagulation factor XII (Hageman         | 3475.8455 |
| 5354 | AA010324_at_NA_illumina        | Zi09c03.r1 Soares fetal liver spleen 1NFLS  | 3475.8882 |
| 5355 | S57887_at_GI_31543409-S        | (T1)=elastin translocation allele {exon 28, | 3475.9016 |
| 5356 | S59049_at_GI_21361446-S        | RGS1 Regulator of G-protein signalling 1    | 3475.9253 |
| 5357 | RC_AA194384_at_GI_18152788-S   | EST: zq05e05.s1 Stratagene muscle           | 3476.0044 |
| 5358 | M59916_at_GI_40254417-S        | SMPD1 Sphingomyelin phosphodiesterase       | 3476.0356 |
| 5359 | R68424_at_NA_illumina          | EST: yh99e09.r1 Homo sapiens cDNA           | 3476.049  |
| 5360 | RC_AA481499_at_GI_8923519-S    | EST: aa34b04.s1 NCI_CGAP_GCB1               | 3476.0999 |
| 5361 | M62843_at_GI_21361338-S        | PARANEOPLASTIC                              | 3476.1335 |
| 5362 | Z36714_at_GI_4502620-S         | CCNF Cyclin F                               | 3476.1555 |
| 5363 | AFFX-CreX-5_st_NA_illumina     | AFFX-CreX-5_st (endogenous control)         | 3476.1575 |

|      |                               |                                            |           |
|------|-------------------------------|--------------------------------------------|-----------|
| 5364 | AFFX-CreX-5_st-2_NA_illumina  | AFFX-CreX-5_st (miscellaneous control -    | 3476.1575 |
| 5365 | U60521_at_GI_14790127-A       | Cysteine protease ICE-LAP6 mRNA            | 3476.1914 |
| 5366 | M62782_s_at_NA_illumina       | IGFBP5 Insulin-like growth factor binding  | 3476.2224 |
| 5367 | M27533_s_at_GI_31377790-S     | Ig rearranged B7 protein mRNA VC1-         | 3476.2336 |
| 5368 | D28791_at_GI_11863127-A       | PIGA Phosphatidylinositol glycan, class A  | 3476.2454 |
| 5369 | AA237089_at_NA_illumina       | EST: zs01d07.r1 NCI_CGAP_GCB1 Homo         | 3476.2627 |
| 5370 | RC_AA019712_at_NA_illumina    | KIAA0735 gene product                      | 3476.2837 |
| 5371 | RC_AA233370_at_NA_illumina    | EST: zr48f01.s1 Soares NhHMPu S1           | 3476.3188 |
| 5372 | HG2714-HT2810_at_NA_illumina  | Tyrosine Kinase (Gb:Z25436)                | 3476.381  |
| 5373 | U87593_f_at_NA_illumina       | Endogenous retrovirus clone P1.8           | 3476.4128 |
| 5374 | U15555_at_GI_31881646-S       | Serine palmitoyltransferase (LCB2) mRNA,   | 3476.4941 |
| 5375 | RC_C21123_at_NA_illumina      | EST: HUMGS0002071, Human Gene              | 3476.5173 |
| 5376 | RC_AA028899_at_NA_illumina    | EST: zk08d09.s1 Soares pregnant uterus     | 3476.5215 |
| 5377 | RC_AA432074_at_NA_illumina    | EST: zw89c01.s1 Soares total fetus         | 3476.5217 |
| 5378 | RC_AA399226_at_GI_10092690-S  | Homo sapiens chromosome 19, cosmid         | 3476.5464 |
| 5379 | RC_AA454943_at_NA_illumina    | EST: aa30d03.s1 NCI_CGAP_GCB1              | 3476.5713 |
| 5380 | V01516_f_at_NA_illumina       | KERATIN, TYPE II CYTOSKELETAL 6D           | 3476.5725 |
| 5381 | RC_D60246_at_NA_illumina      | EST: Human fetal brain cDNA 3'-end GEN-    | 3476.7104 |
| 5382 | U66685_at_GI_8922935-S        | EST: Human clone EST201864 ATP-            | 3476.7495 |
| 5383 | D12686_at_GI_38201618-A       | EIF4G Eukaryotic translation initiation    | 3476.857  |
| 5384 | RC_AA435679_at_NA_illumina    | EST: zt75f10.s1 Soares testis NHT Homo     | 3476.866  |
| 5385 | AA136315_at_NA_illumina       | EST: zn82e03.r1 Stratagene lung            | 3476.9233 |
| 5386 | RC_AA394146_at_GI_31881778-A  | EST: zt49g07.s1 Soares ovary tumor         | 3477.034  |
| 5387 | U95019_s_at_NA_illumina       | Voltage-dependent calcium channel beta-    | 3477.0405 |
| 5388 | AA442334_at_GI_41872338-I     | EST: zv58c05.r1 Soares testis NHT Homo     | 3477.0564 |
| 5389 | AFFX-BioDn-3_st_NA_illumina   | AFFX-BioDn-3_st (endogenous control)       | 3477.1084 |
| 5390 | AFFX-BioDn-3_st-2_NA_illumina | AFFX-BioDn-3_st (miscellaneous control -   | 3477.1084 |
| 5391 | RC_AA453790_at_GI_44888817-S  | EST: aa19f01.s1 Soares NhHMPu S1           | 3477.1973 |
| 5392 | H19903_at_NA_illumina         | EST: yn57h08.r1 Homo sapiens cDNA          | 3477.2559 |
| 5393 | W02877_at_NA_illumina         | Breakpoint cluster region protein, uterine | 3477.2705 |
| 5394 | RC_AA478106_at_NA_illumina    | EST: zt89d01.s1 Soares testis NHT Homo     | 3477.2993 |
| 5395 | RC_AA442880_at_NA_illumina    | EST: zv60f11.s1 Soares testis NHT Homo     | 3477.3367 |
| 5396 | X17094_at_GI_20336193-S       | PACE Paired basic amino acid cleaving      | 3477.4114 |
| 5397 | U28488_s_at_GI_21314629-S     | Putative G protein-coupled receptor        | 3477.4507 |
| 5398 | U33147_at_GI_4505168-S        | Mammaglobin mRNA                           | 3477.5833 |
| 5399 | U59913_at_NA_illumina         | SMAD5 (Smad5) mRNA                         | 3477.627  |
| 5400 | L27624_s_at_NA_illumina       | TISSUE FACTOR PATHWAY INHIBITOR            | 3477.6494 |
| 5401 | M65062_at_NA_illumina         | IGFBP5 Insulin-like growth factor binding  | 3477.7236 |
| 5402 | L40379_at_GI_42516568-S       | Thyroid receptor interactor (TRIP10)       | 3477.7278 |
| 5403 | AA053096_at_NA_illumina       | EST: zl71h06.r1 Stratagene colon           | 3477.7458 |
| 5404 | HG3264-HT3441_at_NA_illumina  | Af-6 (Gb:U02478)                           | 3477.8083 |
| 5405 | RC_AA143190_s_at_NA_illumina  | EST: zo36a01.s1 Stratagene endothelial     | 3477.8225 |
| 5406 | M60748_at_GI_20544164-S       | Histone H1 (H1F4) gene                     | 3477.892  |

|      |                                |                                           |           |
|------|--------------------------------|-------------------------------------------|-----------|
| 5407 | X56654_at_GI_4503400-S         | DSG1 Desmoglein 1                         | 3477.9058 |
| 5408 | RC_AA478726_at_GI_40255138-S   | EST: zv14d09.s1 Soares NhHMPu S1          | 3477.9392 |
| 5409 | RC_AA058532_at_NA_illumina     | EST: zf56d07.s1 Soares retina N2b4HR      | 3477.9614 |
| 5410 | RC_AA428121_r_at_NA_illumina   | EST: zw50g01.s1 Soares total fetus        | 3478.0408 |
| 5411 | U77949_at_GI_16357469-S        | Cdc6-related protein (HsCDC6) mRNA        | 3478.0532 |
| 5412 | U79775_at_NA_illumina          | D21S2056E, novel nuclear protein 1        | 3478.2048 |
| 5413 | L10844_at_NA_illumina          | CDC42 Cell division cycle 42 (GTP-binding | 3478.234  |
| 5414 | M61733_at-2_NA_illumina        | Erythrocyte membrane protein band 4.1     | 3478.243  |
| 5415 | M61733_at_GI_4758273-S         | EPB41 Erythrocyte membrane protein        | 3478.243  |
| 5416 | RC_AA020925_at_NA_illumina     | EST: ze64b11.s1 Soares retina N2b4HR      | 3478.3008 |
| 5417 | D13969_at_NA_illumina          | DNA-BINDING PROTEIN MEL-18                | 3478.3218 |
| 5418 | RC_AA620395_at_GI_6912283-S    | EST: ae57c05.s1 Stratagene lung           | 3478.3682 |
| 5419 | X64643_at_NA_illumina          | C6.1A PROTEIN                             | 3478.3752 |
| 5420 | HG3962-HT4232_at_NA_illumina   | Sialyltransferase, Stx                    | 3478.4534 |
| 5421 | U07225_at_GI_28872719-A        | P2U nucleotide receptor mRNA              | 3478.474  |
| 5422 | AA383520_at_NA_illumina        | EST: EST97097 Testis I Homo sapiens       | 3478.5693 |
| 5423 | U33838_at_NA_illumina          | NF-kappa-B p65delta3 mRNA, spliced        | 3478.6145 |
| 5424 | RC_AA069549_at_NA_illumina     | EST: zm52e03.s1 Stratagene fibroblast     | 3478.656  |
| 5425 | U21556_at_NA_illumina          | Membrane protein-like protein mRNA,       | 3478.671  |
| 5426 | X52075_rna1_at_NA_illumina     | Sialophorin (CD43)                        | 3478.7397 |
| 5427 | RC_C20974_at_GI_4759311-S      | Vanin 1                                   | 3478.7468 |
| 5428 | U43628_at_GI_18780284-A        | Human mucosal addressin cell adhesion     | 3478.752  |
| 5429 | AA286726_at_NA_illumina        | EST: zs53c11.r1 NCI_CGAP_GCB1 Homo        | 3478.7944 |
| 5430 | X99975_at_NA_illumina          | Nuclear orphan receptor mRNA              | 3478.8608 |
| 5431 | RC_D55590_at_GI_34222356-S     | EST: Human fetal brain cDNA 3'-end GEN-   | 3478.8662 |
| 5432 | RC_AA398606_at_NA_illumina     | EST: zt74a08.s1 Soares testis NHT Homo    | 3478.8862 |
| 5433 | RC_D20490_at_NA_illumina       | EST: Human HL60 3'directed Mbol cDNA,     | 3478.8975 |
| 5434 | RC_AA025237_at_NA_illumina     | EST: ze81f06.s1 Soares fetal heart        | 3478.9768 |
| 5435 | HG1761-HT1778_s_at_NA_illumina | Tyrosine Kinase Fer                       | 3479.053  |
| 5436 | AA389673_at_GI_7705631-S       | EST: M164 Fetal heart, Lambda ZAP         | 3479.1543 |
| 5437 | D62628_at_NA_illumina          | EST: Human aorta cDNA 5'-end GEN-         | 3479.185  |
| 5438 | RC_AA029703_at_GI_40255022-S   | EST: ze95h08.s1 Soares fetal heart        | 3479.1965 |
| 5439 | X97671_at_NA_illumina          | EPOR Erythropoietin receptor              | 3479.2036 |
| 5440 | D86980_at_NA_illumina          | KIAA0227 gene, partial cds                | 3479.2056 |
| 5441 | AA133016_at_GI_18375526-A      | EST: zo19c06.r1 Stratagene colon          | 3479.2612 |
| 5442 | AA059213_at_NA_illumina        | EST: zf64g11.r1 Soares retina N2b4HR      | 3479.2842 |
| 5443 | AA418478_at_GI_21359932-S      | EST: zv92d05.r1 Soares NhHMPu S1          | 3479.3281 |
| 5444 | L38707_at_GI_40806174-S        | Diacylglycerol kinase (DAGK) mRNA         | 3479.3408 |
| 5445 | L38707_at-2_NA_illumina        | Diacylglycerol kinase, theta (110kD)      | 3479.3408 |
| 5446 | AA355059_at_NA_illumina        | EST: EST63401 Jurkat T-cells V Homo       | 3479.4165 |
| 5447 | RC_AA071075_at_NA_illumina     | EST: zm58d10.s1 Stratagene fibroblast     | 3479.4983 |
| 5448 | U46767_at_GI_22538799-S        | Monocyte chemoattractant protein-4        | 3479.7268 |
| 5449 | X86163_at_GI_17352499-S        | BDKRB2 Bradykinin receptor B2             | 3479.7834 |

|      |                               |                                          |           |
|------|-------------------------------|------------------------------------------|-----------|
| 5450 | RC_AA449720_s_at_GI_37059725- | Homo sapiens clone 24706 mRNA            | 3479.817  |
| 5451 | X04571_at_GI_6031163-S        | EGF Epidermal growth factor              | 3479.89   |
| 5452 | Z70276_s_at_GI_21614509-A     | Fibroblast growth factor 12 (partial)    | 3479.995  |
| 5453 | D13644_at_GI_42659463-S       | 40S RIBOSOMAL PROTEIN S17                | 3480.0806 |
| 5454 | U36448_at_GI_34452710-A       | Ca2+-dependent activator protein for     | 3480.145  |
| 5455 | RC_AA403312_s_at_NA_illumina  | EST: zt44f05.s1 Soares ovary tumor       | 3480.1638 |
| 5456 | H01674_at_NA_illumina         | Yj33d11.r1 Homo sapiens cDNA clone       | 3480.1748 |
| 5457 | AA287724_at_NA_illumina       | EST: zs53h10.r1 NCI_CGAP_GCB1 Homo       | 3480.187  |
| 5458 | AA256976_at_GI_41872708-A     | EST: zr81h01.r1 Soares NhHMPu S1         | 3480.188  |
| 5459 | N36040_at_NA_illumina         | EST: yy01h09.r1 Homo sapiens cDNA        | 3480.1946 |
| 5460 | M79462_at_GI_15451776-A       | PML Probable transcription factor PML    | 3480.2268 |
| 5461 | M79462_at-2_NA_illumina       | Promyelocytic leukemia                   | 3480.2268 |
| 5462 | U44111_at_GI_5901969-S        | Histamine N-methyltransferase            | 3480.2527 |
| 5463 | M24364_at_NA_illumina         | HLA-DQB1 Major histocompatibility        | 3480.395  |
| 5464 | RC_AA256127_at_NA_illumina    | EST: zr79g09.s1 Soares NhHMPu S1         | 3480.4368 |
| 5465 | D00760_at_GI_45359861-S       | PSMA3 Proteasome component C3            | 3480.4646 |
| 5466 | AB002329_at_GI_6912649-S      | KIAA0331 gene product                    | 3480.6096 |
| 5467 | RC_AA148853_at_NA_illumina    | EST: zo01f10.s1 Stratagene colon         | 3480.6108 |
| 5468 | AFFX-ThrX-5_at-2_NA_illumina  | AFFX-ThrX-5_at (miscellaneous control -  | 3480.6519 |
| 5469 | AFFX-ThrX-5_at_NA_illumina    | AFFX-ThrX-5_at (endogenous control)      | 3480.6519 |
| 5470 | AA386291_at_NA_illumina       | EST: EST08009 Fetal brain Homo sapiens   | 3480.661  |
| 5471 | AA242915_at_GI_21361630-S     | Human Chromosome 16 BAC clone            | 3480.6624 |
| 5472 | M82962_at_GI_5031908-S        | N-benzoyl-L-tyrosyl-p-amino-benzoic acid | 3480.7356 |
| 5473 | AA035158_at_NA_illumina       | EST: zk27b12.r1 Soares pregnant uterus   | 3480.7788 |
| 5474 | L40377_at_GI_38504672-S       | Cytoplasmic antiproteinase 2 (CAP2)      | 3480.853  |
| 5475 | YEL019c/MMS21_at_NA_illumina  | No info for gene                         | 3480.907  |
| 5476 | RC_AA436174_at_NA_illumina    | EST: zv22d06.s1 Soares NhHMPu S1         | 3480.9907 |
| 5477 | J05073_at_GI_4505754-S        | PGAM2 Phosphoglycerate mutase 2          | 3481.038  |
| 5478 | X12458_rna1_at_GI_10938005-S  | P3 protein (AA 1-1382) gene extracted    | 3481.0925 |
| 5479 | AA425563_at_GI_40549458-S     | EST: zw46e06.r1 Soares total fetus       | 3481.1006 |
| 5480 | RC_AA102571_at_GI_38504670-S  | EST: zn42b06.s1 Stratagene endothelial   | 3481.146  |
| 5481 | U66077_at_NA_illumina         | DAZ Deleted in azoospermia               | 3481.1653 |
| 5482 | Y10514_s_at_NA_illumina       | CD152 protein                            | 3481.2085 |
| 5483 | X67337_at_GI_5901927-S        | HPBR11-4 mRNA                            | 3481.2148 |
| 5484 | RC_AA129268_r_at_NA_illumina  | Homo sapiens mRNA for KIAA0650           | 3481.252  |
| 5485 | S69369_at_GI_31563349-A       | PAX3 Paired box homeotic gene 3          | 3481.2808 |
| 5486 | Y12478_at_GI_21536427-S       | CHD5 protein                             | 3481.3818 |
| 5487 | RC_AA458952_at_NA_illumina    | EST: zx88e03.s1 Soares ovary tumor       | 3481.3909 |
| 5488 | RC_D20728_at_NA_illumina      | EST: Human HL60 3'directed Mbol cDNA,    | 3481.3945 |
| 5489 | H86648_at_GI_42659614-S       | EST: yt02a04.r1 Homo sapiens cDNA        | 3481.428  |
| 5490 | AA362708_at_NA_illumina       | EST: EST72485 Ovary II Homo sapiens      | 3481.4927 |
| 5491 | RC_AA039597_at_NA_illumina    | EST: zf08e09.s1 Soares fetal heart       | 3481.5356 |
| 5492 | U35637_s_at_GI_8400716-S      | Nebulin mRNA, partial cds                | 3481.617  |



|      |                              |                                             |           |
|------|------------------------------|---------------------------------------------|-----------|
| 5493 | T87750_at_NA_illumina        | EST: ye08g09.r1 Homo sapiens cDNA           | 3481.629  |
| 5494 | X78710_at_GI_5174588-S       | MTF-1 mRNA for metal-regulatory             | 3481.6826 |
| 5495 | HG2492-HT2588_at_NA_illumina | Glutamate Receptor Subunit                  | 3481.762  |
| 5496 | RC_D56989_f_at_NA_illumina   | EST: Human aorta cDNA 3'-end GEN-           | 3481.793  |
| 5497 | N42891_at_NA_illumina        | Basic transcription element binding protein | 3481.8223 |
| 5498 | RC_AA281260_at_NA_illumina   | EST: zs94f04.s1 NCI_CGAP_GCB1 Homo          | 3481.8416 |
| 5499 | AA434013_at_NA_illumina      | EST: zw25g01.r1 Soares ovary tumor          | 3481.8423 |
| 5500 | Z46788_at_GI_4557508-S       | Cylicin II                                  | 3481.8425 |
| 5501 | L29217_s_at_NA_illumina      | CDC-like kinase 3                           | 3481.843  |
| 5502 | RC_D60325_at_GI_22749380-S   | EST: Human fetal brain cDNA 3'-end GEN-     | 3481.844  |
| 5503 | R19997_at_NA_illumina        | Homo sapiens exportin t mRNA, complete      | 3481.852  |
| 5504 | RC_D59347_at_NA_illumina     | EST: Human fetal brain cDNA 3'-end GEN-     | 3481.8572 |
| 5505 | D87457_at_GI_18765701-A      | KIAA0281 gene                               | 3481.9973 |
| 5506 | D63477_at_GI_37555887-S      | KIAA0143 gene, partial cds                  | 3482.0059 |
| 5507 | AA071106_f_at_NA_illumina    | EST: zm66e11.r1 Stratagene                  | 3482.0837 |
| 5508 | U07794_cds2_at_NA_illumina   | Tyrosine kinase (TXK) gene                  | 3482.094  |
| 5509 | X03794_s_at_GI_24797132-S    | HOXB5 Homeo box B5 (2.1 protein)            | 3482.1934 |
| 5510 | Y10512_at_NA_illumina        | CD282 protein                               | 3482.1965 |
| 5511 | L47726_at_GI_4557818-S       | PAH Phenylalanine hydroxylase               | 3482.2551 |
| 5512 | RC_AA100450_at_NA_illumina   | EST: zl81c09.s1 Stratagene colon            | 3482.2854 |
| 5513 | D86975_at_NA_illumina        | KIAA0222 gene                               | 3482.3125 |
| 5514 | RC_AA022632_at_NA_illumina   | EST: ze73a01.s1 Soares fetal heart          | 3482.346  |
| 5515 | X04434_at_GI_11068002-S      | IGF1R Insulin-like growth factor 1 receptor | 3482.4094 |
| 5516 | RC_AA470066_at_NA_illumina   | EST: zt98b05.s1 Soares testis NHT Homo      | 3482.4775 |
| 5517 | N45402_at_GI_40804760-S      | EST: yw97f08.r1 Homo sapiens cDNA           | 3482.4922 |
| 5518 | AA410942_at_NA_illumina      | Zt32h02.r1 Soares ovary tumor NbHOT         | 3482.5317 |
| 5519 | L21934_at_GI_24431944-S      | SOAT Sterol O-acyltransferase (acyl-        | 3482.5527 |
| 5520 | X60787_s_at_GI_31563335-A    | INTERLEUKIN ENHANCER-BINDING                | 3482.5752 |
| 5521 | HG2604-HT2700_at_NA_illumina | Pan-2                                       | 3482.6873 |
| 5522 | M60315_at_GI_4809281-S       | BONE MORPHOGENETIC PROTEIN 6                | 3482.7102 |
| 5523 | D31765_at_GI_23097291-S      | KIAA0061 gene, partial cds                  | 3482.7253 |
| 5524 | R14091_at_NA_illumina        | EST: yf69a08.r1 Homo sapiens cDNA           | 3482.7886 |
| 5525 | W90186_at_NA_illumina        | EST: zh77d02.r1 Soares fetal liver spleen   | 3482.8054 |
| 5526 | M36821_s_at_NA_illumina      | GRO3 oncogene                               | 3482.9358 |
| 5527 | L07615_at_GI_31543295-S      | Neuropeptide Y receptor Y1 (NPYY1)          | 3483.028  |
| 5528 | X00948_at_GI_20143932-A      | Prepro-relaxin H2                           | 3483.0745 |
| 5529 | RC_AA620965_at_GI_40316947-A | EST: af88f01.s1 Soares testis NHT Homo      | 3483.113  |
| 5530 | H27232_at_NA_illumina        | Yl63e12.r1 Homo sapiens cDNA clone          | 3483.1396 |
| 5531 | R01949_at_NA_illumina        | Homo sapiens mRNA for KIAA0855              | 3483.1543 |
| 5532 | RC_AA287100_at_GI_22095362-S | EST: zs58f04.s1 NCI_CGAP_GCB1 Homo          | 3483.181  |
| 5533 | AA477046_at_GI_40255038-S    | EST: zu38d08.r1 Soares ovary tumor          | 3483.1914 |
| 5534 | X55019_s_at-2_NA_illumina    | Cholinergic receptor, nicotinic, delta      | 3483.2158 |
| 5535 | X55019_s_at_GI_4557460-S     | CHRND Cholinergic receptor, nicotinic,      | 3483.2158 |

|      |                              |                                           |           |
|------|------------------------------|-------------------------------------------|-----------|
| 5536 | RC_AA454733_s_at_NA_illumina | EST: zx77c10.s1 Soares ovary tumor        | 3483.2297 |
| 5537 | M80397_s_at_GI_4505932-S     | POLD1 Polymerase (DNA directed), delta    | 3483.2354 |
| 5538 | M80397_s_at-2_NA_illumina    | Polymerase (DNA directed), delta 1,       | 3483.2354 |
| 5539 | HG3989-HT4259_at_NA_illumina | Cpg-Enriched Dna, Clone E14               | 3483.2556 |
| 5540 | RC_AA412505_at_NA_illumina   | EST: zt97b09.s1 Soares testis NHT Homo    | 3483.2588 |
| 5541 | AA075998_at_GI_5031858-S     | Zm89b09.r1 Stratagene ovarian cancer      | 3483.2788 |
| 5542 | AA485585_at_NA_illumina      | EST: zx90e01.r1 Soares ovary tumor        | 3483.2932 |
| 5543 | N28643_at_NA_illumina        | Melastatin 1                              | 3483.372  |
| 5544 | L29376_at_NA_illumina        | (clone 3.8-1) MHC class I mRNA fragment   | 3483.3906 |
| 5545 | X82125_at_GI_5032244-S       | HOK-2 mRNA for zinc finger protein        | 3483.4478 |
| 5546 | D64159_at_NA_illumina        | 3-7 gene product, partial cds             | 3483.4695 |
| 5547 | Y13896_at_NA_illumina        | Skeletal muscle alternate 5'end of gene   | 3483.4714 |
| 5548 | W56102_at_NA_illumina        | EST: zc58g07.r1 Soares parathyroid tumor  | 3483.5    |
| 5549 | HG2191-HT2261_at_NA_illumina | Crystallin, Beta B3 (Gb:X15145)           | 3483.5725 |
| 5550 | M65199_at_GI_31542584-S      | EDN2 Endothelin 2                         | 3483.5886 |
| 5551 | D87328_at_GI_19923101-S      | HLCS Holocarboxylase synthetase (biotin-  | 3483.618  |
| 5552 | M19684_at_NA_illumina        | Alpha-1-antitrypsin-related protein gene, | 3483.65   |
| 5553 | RC_AA456039_at_GI_40254990-S | EST: aa03d01.s1 Soares NhHMPu S1          | 3483.6943 |
| 5554 | X55330_at_GI_32313568-S      | AGA Aspartylglucosaminidase               | 3483.7036 |
| 5555 | RC_AA018463_at_NA_illumina   | EST: ze50e04.s1 Soares retina N2b4HR      | 3483.754  |
| 5556 | U70987_at_GI_4755133-S       | GAP binding protein p62dok (DOK) mRNA     | 3483.7573 |
| 5557 | RC_AA460720_at_NA_illumina   | EST: zx69g03.s1 Soares total fetus        | 3483.8728 |
| 5558 | R12903_at_NA_illumina        | EST: yf70a06.r1 Homo sapiens cDNA         | 3483.9395 |
| 5559 | RC_AA159639_at_GI_19923518-S | EST: zo86f09.s1 Stratagene ovarian        | 3483.981  |
| 5560 | Z46973_at_GI_34761063-S      | Phosphatidylinositol 3-kinase             | 3484.0527 |
| 5561 | X75535_at_NA_illumina        | 33 KD HOUSEKEEPING PROTEIN                | 3484.1135 |
| 5562 | D42047_at_NA_illumina        | KIAA0089 gene, partial cds                | 3484.1294 |
| 5563 | U00803_s_at_NA_illumina      | Fyn-related kinase                        | 3484.1636 |
| 5564 | U61741_at_NA_illumina        | Clone 18 (HL-18), dynein heavy chain      | 3484.1792 |
| 5565 | RC_AA450303_at_NA_illumina   | EST: zx43h03.s1 Soares total fetus        | 3484.2188 |
| 5566 | S78693_f_at_NA_illumina      | Alpha CREB-1=cyclic AMP response          | 3484.3071 |
| 5567 | U83600_at_NA_illumina        | Death domain receptor 3 (DDR3) mRNA,      | 3484.389  |
| 5568 | Z22535_at_GI_41349436-S      | SERINE/THREONINE-PROTEIN KINASE           | 3484.514  |
| 5569 | AA094735_at_NA_illumina      | EST: cp1422.seq.F Fetal heart, Lambda     | 3484.5278 |
| 5570 | AA314587_at_GI_41352698-S    | EST: EST186420 Colon carcinoma (HCC)      | 3484.6226 |
| 5571 | RC_AA446593_at_NA_illumina   | KIAA0737 gene product                     | 3484.635  |
| 5572 | RC_AA428379_at_NA_illumina   | EST: zw34e11.s1 Soares ovary tumor        | 3484.647  |
| 5573 | AA306051_at_GI_7705345-S     | KIAA0683 gene product                     | 3484.6814 |
| 5574 | RC_AA235343_at_NA_illumina   | EST: zs40a08.s1 Soares NhHMPu S1          | 3484.7524 |
| 5575 | AA253017_at_NA_illumina      | EST: zr51h08.r1 Soares NhHMPu S1          | 3484.784  |
| 5576 | M64099_at_GI_4758431-S       | GAMMA-GLUTAMYLTRANSPEPTIDASE              | 3484.8616 |
| 5577 | H11788_at_NA_illumina        | EST: ym11b06.r1 Homo sapiens cDNA         | 3484.8623 |
| 5578 | AA206236_at_GI_13899240-S    | Zq54c06.r1 Stratagene neuroepithelium     | 3484.9602 |

|      |                                |                                           |           |
|------|--------------------------------|-------------------------------------------|-----------|
| 5579 | M31241_s_at_NA_illumina        | Complement receptor 1 (CR1) gene, exon    | 3484.9617 |
| 5580 | RC_AA428069_at_NA_illumina     | EST: zw57b01.s1 Soares total fetus        | 3484.9773 |
| 5581 | RC_AA465168_at_GI_42476006-S   | EST: aa33d06.s1 NCI_CGAP_GCB1             | 3485.0488 |
| 5582 | X52773_at-2_NA_illumina        | Retinoid X receptor, alpha                | 3485.0784 |
| 5583 | X52773_at_GI_21536318-S        | RXRA Retinoid X receptor, alpha           | 3485.0784 |
| 5584 | RC_AA251759_at_NA_illumina     | EST: zs11b01.s1 NCI_CGAP_GCB1             | 3485.1    |
| 5585 | S82592_at_GI_29789001-S        | Evi-1                                     | 3485.1118 |
| 5586 | N34737_s_at_NA_illumina        | EST: yx82f11.r1 Homo sapiens cDNA         | 3485.2424 |
| 5587 | W26981_at_GI_9945321-S         | EST: 17a8 Human retina cDNA randomly      | 3485.2427 |
| 5588 | J03258_at_GI_4507882-S         | VDR Vitamin D (1,25- dihydroxyvitamin     | 3485.2732 |
| 5589 | S77393_at_GI_20070274-S        | Transcript ch138 [human, RF1,RF48         | 3485.2876 |
| 5590 | RC_AA150694_at_GI_34996522-S   | EST: zl44d08.s1 Soares pregnant uterus    | 3485.29   |
| 5591 | V00503_at_GI_21536289-S        | COL1A2 Collagen, type I, alpha-2          | 3485.3154 |
| 5592 | RC_AA022838_at_GI_29743268-S   | EST: ze72c04.s1 Soares fetal heart        | 3485.3198 |
| 5593 | RC_AA021157_at_NA_illumina     | EST: ze65d11.s1 Soares retina N2b4HR      | 3485.3403 |
| 5594 | U63824_at-2_NA_illumina        | TEA domain family member 4                | 3485.3408 |
| 5595 | U63824_at_GI_4507426-S         | Transcription factor RTEF-1 (RTEF1)       | 3485.3408 |
| 5596 | U43083_at-2_NA_illumina        | Guanine nucleotide binding protein (G     | 3485.567  |
| 5597 | U43083_at_NA_illumina          | GNAQ Guanine nucleotide binding protein   | 3485.567  |
| 5598 | RC_AA033838_at_NA_illumina     | EST: zf02h05.s1 Soares fetal heart        | 3485.6882 |
| 5599 | U13369_at_NA_illumina          | Ribosomal DNA complete repeating unit     | 3485.702  |
| 5600 | L14595_at_GI_21314631-S        | SLC1A4 Solute carrier family 1            | 3485.748  |
| 5601 | M21642_at_NA_illumina          | ANTITHROMBIN-III PRECURSOR                | 3485.7927 |
| 5602 | R18154_at_NA_illumina          | EST: yf97d10.r1 Homo sapiens cDNA         | 3485.7932 |
| 5603 | RC_AA009770_at_NA_illumina     | EST: zi04c06.s1 Soares fetal liver spleen | 3485.816  |
| 5604 | RC_AA256485_at_GI_10190747-S   | EST: zr81e12.s1 Soares NhHMPu S1          | 3485.8555 |
| 5605 | D25215_at_GI_7657151-S         | KIAA0032 gene                             | 3485.8928 |
| 5606 | RC_AA426403_at_NA_illumina     | EST: zv05g04.s1 Soares NhHMPu S1          | 3485.9211 |
| 5607 | RC_AA227941_s_at_GI_22547206-S | EST: zr56c12.s1 Soares NhHMPu S1          | 3485.9607 |
| 5608 | J03925_at_GI_6006013-S         | ITGAM Integrin, alpha M (complement       | 3485.997  |
| 5609 | AA418921_at_NA_illumina        | EST: zw01b03.r1 Soares NhHMPu S1          | 3486.0125 |
| 5610 | W28824_at_NA_illumina          | Homo sapiens DBI-related protein mRNA,    | 3486.0227 |
| 5611 | M11591_at_NA_illumina          | MHC class II HLA-SX-alpha gene            | 3486.0332 |
| 5612 | L20321_at_GI_4507276-S         | STK2 Protein serine/threonine kinase stk2 | 3486.0771 |
| 5613 | AA197134_at_GI_32698779-S      | EST: zq11b11.r1 Stratagene muscle         | 3486.148  |
| 5614 | AA305940_at_NA_illumina        | EST: EST176933 Jurkat T-cells VI Homo     | 3486.1824 |
| 5615 | RC_AA480890_at_NA_illumina     | EST: aa28d08.s1 NCI_CGAP_GCB1             | 3486.276  |
| 5616 | M31165_at_GI_26051242-S        | TUMOR NECROSIS FACTOR-                    | 3486.3174 |
| 5617 | RC_AA181927_at_NA_illumina     | EST: zp66b11.s1 Stratagene endothelial    | 3486.3267 |
| 5618 | AA303626_at_GI_28872735-A      | CAAX box 1                                | 3486.391  |
| 5619 | HG2320-HT2416_at_NA_illumina   | Integrin, Beta 3 Subunit                  | 3486.3938 |
| 5620 | N39708_at_NA_illumina          | EST: yx92c06.r1 Homo sapiens cDNA         | 3486.395  |
| 5621 | M60450_s_at_GI_25952084-S      | KCNA4 Potassium voltage-gated channel,    | 3486.407  |

|      |                                |                                           |           |
|------|--------------------------------|-------------------------------------------|-----------|
| 5622 | L35251_rna1_at_GI_21314642-S   | Extracellular matrix protein (MFAP3) gene | 3486.4097 |
| 5623 | L05515_at_GI_4758499-A         | CAMP responsive element binding protein   | 3486.441  |
| 5624 | D86096_cds3_at_NA_illumina     | EP3-IV gene extracted from Human DNA      | 3486.4429 |
| 5625 | D14823_at_NA_illumina          | Chimeric mRNA derived from AML1 gene      | 3486.517  |
| 5626 | K01884_at_NA_illumina          | Blym-1 transforming gene, complete        | 3486.5393 |
| 5627 | X66171_at_NA_illumina          | CMRF35 mRNA                               | 3486.6018 |
| 5628 | M62810_at_GI_6912699-A         | TCF6L1 Transcription factor 6-like 1      | 3486.6099 |
| 5629 | Z24459_xpt5_at_NA_illumina     | Exon2A from H.sapiens MTCP1 gene,         | 3486.6606 |
| 5630 | RC_AA401437_at_GI_37547085-S   | EST: zu68h06.s1 Soares testis NHT Homo    | 3486.7102 |
| 5631 | M17183_s_at_GI_39995087-S      | Parathyroid hormone-related protein       | 3486.736  |
| 5632 | AC002450_at_GI_7657580-S       | BAC clone GS244B22 from 7q21-q22,         | 3486.7693 |
| 5633 | H06532_at_GI_34304362-S        | Homo sapiens chromosome 11, BAC CIT-      | 3486.8215 |
| 5634 | R59531_at_NA_illumina          | Yg97b12.r1 Homo sapiens cDNA clone        | 3486.8408 |
| 5635 | M97639_at_GI_19743897-S        | Transmembrane receptor (ror2) mRNA        | 3486.8625 |
| 5636 | RC_AA436548_at_NA_illumina     | EST: zv08b10.s1 Soares NhHMPu S1          | 3486.867  |
| 5637 | X95525_at_NA_illumina          | TBP-associated factor (hTAFII100) mRNA,   | 3486.891  |
| 5638 | X95525_at-2_NA_illumina        | H.sapiens mRNA for TAFII100 protein       | 3486.891  |
| 5639 | U68133_at_NA_illumina          | U68133 Human cell line PCI-O6A Homo       | 3486.9575 |
| 5640 | RC_AA412082_at_NA_illumina     | EST: zt66g12.s1 Soares testis NHT Homo    | 3486.9578 |
| 5641 | D31891_at_GI_41281392-S        | KIAA0067 gene                             | 3487.0764 |
| 5642 | M58460_at-2_NA_illumina        | Polymyositis/scleroderma autoantigen 1    | 3487.081  |
| 5643 | M58460_at_NA_illumina          | 75-kD autoantigen (PM-Sc1) mRNA           | 3487.081  |
| 5644 | X15573_at_GI_21361069-S        | PFKL Phosphofructokinase (liver type)     | 3487.104  |
| 5645 | D90064_at_GI_21314599-S        | CGM6 Carcinoembryonic antigen gene        | 3487.1323 |
| 5646 | AA191072_at_NA_illumina        | EST: zq43c11.r1 Stratagene hNT neuron     | 3487.2695 |
| 5647 | RC_AA400517_at_GI_11386200-S   | EST: zu70h06.s1 Soares testis NHT Homo    | 3487.2695 |
| 5648 | RC_AA447504_at_NA_illumina     | EST: zw90h07.s1 Soares total fetus        | 3487.2715 |
| 5649 | AA203527_at_GI_5032046-S       | Homo sapiens ribonuclease P protein       | 3487.3372 |
| 5650 | AA401238_at_GI_33469969-A      | EST: zv63f03.r1 Soares total fetus        | 3487.3887 |
| 5651 | RC_AA621162_s_at_NA_illumina   | EST: af61g05.s1 Soares NhHMPu S1          | 3487.396  |
| 5652 | AFFX-HUMISGF3A/M97935_5_at-    | No info for gene                          | 3487.4187 |
| 5653 | AFFX-                          | AFFX-HUMISGF3A/M97935_5_at                | 3487.4187 |
| 5654 | AA470056_at_GI_32171235-S      | EST: zt94g06.r1 Soares testis NHT Homo    | 3487.4998 |
| 5655 | D79603_at_NA_illumina          | EST: Human aorta cDNA 5'-end GEN-         | 3487.5256 |
| 5656 | U09860_at_GI_4506150-S         | PRSS7 Protease, serine, 7 (enterokinase)  | 3487.5354 |
| 5657 | RC_AA045249_at_NA_illumina     | EST: zf11c09.s1 Soares fetal heart        | 3487.5608 |
| 5658 | AA228127_at_GI_13376767-S      | EST: zr58c05.r1 Soares NhHMPu S1          | 3487.5886 |
| 5659 | Z70295_at_GI_6005773-S         | GCAP-II/uroguanylin precursor             | 3487.5984 |
| 5660 | RC_AA251772_at_NA_illumina     | H.sapiens mRNA for HES1 protein           | 3487.6782 |
| 5661 | U58675_cds1_at_NA_illumina     | OR17-228 gene extracted from Human        | 3487.698  |
| 5662 | AA024428_at_NA_illumina        | EST: ze73e12.r1 Soares fetal heart        | 3487.7568 |
| 5663 | L76465_at_GI_31542938-S        | 15-HYDROXYPROSTAGLANDIN                   | 3487.7815 |
| 5664 | AC002076_cds2_at_GI_41584205-S | WUGSC:GS345D13.2 gene (G-protein          | 3487.7834 |

|      |                                |                                            |           |
|------|--------------------------------|--------------------------------------------|-----------|
| 5665 | RC_AA278403_at_NA_illumina     | EST: zt08d09.s1 NCI_CGAP_GCB1 Homo         | 3487.7927 |
| 5666 | W52431_at_NA_illumina          | EST: zc45b12.r1 Soares senescent           | 3487.8667 |
| 5667 | RC_AA421572_at_GI_40255061-S   | EST: zu25e03.s1 Soares NhHMPu S1           | 3487.8694 |
| 5668 | D17716_at-2_NA_illumina        | Mannosyl (alpha-1,6-)-glycoprotein beta-   | 3488.0422 |
| 5669 | D17716_at_GI_6031185-S         | N-acetylglucosaminyltransferase V          | 3488.0422 |
| 5670 | RC_AA412674_at_NA_illumina     | Homo sapiens erythroid differentiation and | 3488.043  |
| 5671 | RC_AA132554_at_GI_37545687-S   | EST: zo20g08.s1 Stratagene colon           | 3488.0464 |
| 5672 | AA167824_at_NA_illumina        | Cell division cycle 27                     | 3488.0586 |
| 5673 | AA447876_at_NA_illumina        | EST: aa20c09.r1 Soares NhHMPu S1           | 3488.0906 |
| 5674 | U11821_s_at_NA_illumina        | Fas ligand (FasL) mRNA                     | 3488.1223 |
| 5675 | M58509_cds1_s_at_GI_13435349-A | FDXR gene (adrenodoxin reductase)          | 3488.1414 |
| 5676 | L38517_at_GI_37549373-S        | Indian hedgehog protein (IHH) mRNA, 5'     | 3488.1653 |
| 5677 | Y08319_at_GI_4758643-S         | Kinesin-2                                  | 3488.188  |
| 5678 | X02956_f_at_NA_illumina        | Interferon, alpha 5                        | 3488.1987 |
| 5679 | X07496_at_NA_illumina          | APOA1 Apolipoprotein A-I                   | 3488.2227 |
| 5680 | RC_AA250979_at_NA_illumina     | EST: zs06g02.s1 NCI_CGAP_GCB1              | 3488.3086 |
| 5681 | D42055_at_GI_38257154-A        | NEDD-4 PROTEIN                             | 3488.3774 |
| 5682 | W16804_at_NA_illumina          | NCK adaptor protein 1                      | 3488.4604 |
| 5683 | M92432_at_GI_4504216-S         | GUC2D Guanylate cyclase 2D, membrane       | 3488.5022 |
| 5684 | X52151_at_GI_7262293-S         | ARSA Arylsulfatase A                       | 3488.5217 |
| 5685 | U19107_rna1_at_GI_5032242-S    | ZNF127 (ZNF127) gene                       | 3488.5256 |
| 5686 | RC_AA233807_at_GI_42659594-S   | EST: zr44f10.s1 Soares NhHMPu S1           | 3488.5303 |
| 5687 | U84540_at_NA_illumina          | Dystrobrevin isoform DTN-3 (DTN) gene,     | 3488.6064 |
| 5688 | L00354_at_GI_4755130-S         | PROCHOLECYSTOKININ PRECURSOR               | 3488.6091 |
| 5689 | RC_AA195720_at_GI_28558980-S   | 33 kDa transcriptional co-activator        | 3488.6694 |
| 5690 | AA459015_at_NA_illumina        | Dihydropyrimidinase-like 2                 | 3488.67   |
| 5691 | Z49826_at_GI_40254474-S        | Hepatocyte nuclear factor 4, gamma         | 3488.753  |
| 5692 | D16688_s_at_GI_4758719-S       | LTG9/MLLT3 mRNA, C-terminal                | 3488.7856 |
| 5693 | U49957_s_at_GI_5031886-S       | LIM protein (LPP) mRNA, partial cds        | 3488.8127 |
| 5694 | AA248169_at_GI_19923565-S      | EST: csg1676.seq.F Human fetal heart,      | 3488.8281 |
| 5695 | W39687_s_at_GI_21361575-S      | EST: zc21e08.r1 Soares senescent           | 3488.8506 |
| 5696 | RC_AA281092_at_NA_illumina     | EST: zt01f01.s1 NCI_CGAP_GCB1 Homo         | 3488.8796 |
| 5697 | C01811_f_at_NA_illumina        | EST: HUMGS0003774, Human Gene              | 3488.9219 |
| 5698 | Y08766_s_at_NA_illumina        | Splicing factor, SF1-Bo isoform            | 3488.9766 |
| 5699 | RC_AA487118_at_NA_illumina     | EST: ab19a05.s1 Stratagene lung            | 3488.9854 |
| 5700 | RC_AA019822_at_GI_7706752-S    | EST: ze61d09.s1 Soares retina N2b4HR       | 3488.988  |
| 5701 | D37965_at_GI_5453871-S         | PDGF receptor beta-like tumor suppressor   | 3489.0212 |
| 5702 | RC_AA433951_at_NA_illumina     | EST: zw52h03.s1 Soares total fetus         | 3489.1125 |
| 5703 | AFFX-LysX-3_at-2_NA_illumina   | AFFX-LysX-3_at (miscellaneous control -    | 3489.1226 |
| 5704 | AFFX-LysX-3_at_NA_illumina     | AFFX-LysX-3_at (endogenous control)        | 3489.1226 |
| 5705 | RC_AA156602_at_GI_6005847-S    | EST: zl18f01.s1 Soares pregnant uterus     | 3489.1228 |
| 5706 | W20054_at_NA_illumina          | EST: zb40a08.r1 Soares parathyroid tumor   | 3489.1355 |
| 5707 | D58082_at_NA_illumina          | Cytochrome c oxidase subunit 11            | 3489.162  |

|      |                                |                                                           |           |
|------|--------------------------------|-----------------------------------------------------------|-----------|
| 5708 | HG429-HT429_at_NA_illumina     | B-Cell Growth Factor 1                                    | 3489.1816 |
| 5709 | HG67-HT67_f_at_NA_illumina     | Zinc Finger Protein (Gb:X61870)                           | 3489.2104 |
| 5710 | RC_AA053917_at_GI_6005718-S    | EST: ze75c02.s1 Soares fetal heart                        | 3489.2395 |
| 5711 | AA248964_at_NA_illumina        | EST: kk6741.seq.F Human fetal heart,                      | 3489.2407 |
| 5712 | X71125_at_GI_9257235-S         | Glutamine cyclotransferase                                | 3489.2556 |
| 5713 | AA298588_at_NA_illumina        | EST114219 HSC172 cells II Homo                            | 3489.2898 |
| 5714 | RC_AA442071_at_NA_illumina     | EST: zw63b06.s1 Soares total fetus                        | 3489.357  |
| 5715 | M24594_at_GI_4504584-S         | IFI56 Interferon-induced protein 56                       | 3489.3584 |
| 5716 | X98743_at_GI_38327633-S        | RNA helicase (Myc-regulated dead box                      | 3489.363  |
| 5717 | U52518_at_GI_19913387-S        | Grb2-related adaptor protein (Grap) mRNA                  | 3489.3887 |
| 5718 | U28043_at_GI_6806920-S         | Plasma membrane Na <sup>+</sup> /H <sup>+</sup> exchanger | 3489.4114 |
| 5719 | AA401605_at_GI_10047121-S      | Homo sapiens BAC clone RG060N22 from                      | 3489.517  |
| 5720 | X01057_at_GI_4557666-S         | IL2RA Interleukin 2 receptor, alpha                       | 3489.5288 |
| 5721 | RC_AA452830_at_NA_illumina     | EST: zx36d04.s1 Soares total fetus                        | 3489.5535 |
| 5722 | M63962_rna1_at_GI_4502290-S    | Gastric H,K-ATPase catalytic subunit gene                 | 3489.648  |
| 5723 | AA434508_at_GI_31542705-S      | Zw31c10.r1 Soares ovary tumor NbHOT                       | 3489.6772 |
| 5724 | Z14093_at_GI_38372929-S        | BCKDHA Branched chain keto acid                           | 3489.764  |
| 5725 | M73239_s_at_GI_33859834-S      | HGF Hepatocyte growth factor                              | 3489.773  |
| 5726 | M26679_at_GI_24497516-S        | HOMEBOX PROTEIN HOX-A5                                    | 3489.8777 |
| 5727 | HG3187-HT3366_s_at_NA_illumina | Tyrosine Phosphatase 1, Non-Receptor,                     | 3489.9094 |
| 5728 | L06175_at_GI_5729965-S         | P5-1 mRNA                                                 | 3489.937  |
| 5729 | AA252581_at_GI_34335132-A      | KIAA0336 gene product                                     | 3489.965  |
| 5730 | RC_D20280_at_NA_illumina       | EST: Human HL60 3'directed MboI cDNA,                     | 3490.0586 |
| 5731 | W68464_at_NA_illumina          | Homo sapiens mRNA for ADP ribosylation                    | 3490.0645 |
| 5732 | U56085_at_GI_4826955-S         | PWP2H protein mRNA                                        | 3490.0955 |
| 5733 | HG3242-HT4231_s_at_NA_illumina | Calcium Channel, Voltage-Gated, Alpha 1e                  | 3490.1519 |
| 5734 | RC_AA447994_at_NA_illumina     | EST: zw82g03.s1 Soares testis NHT                         | 3490.1687 |
| 5735 | RC_AA053022_i_at_GI_33636755-S | EST: zl72f03.s1 Stratagene colon                          | 3490.169  |
| 5736 | C01803_s_at_NA_illumina        | EST: HUMGS0003762, Human Gene                             | 3490.1921 |
| 5737 | Y00083_s_at_NA_illumina        | TGFB2 Transforming growth factor, beta 2                  | 3490.2817 |
| 5738 | R79884_at_NA_illumina          | EST: yi85b08.r1 Homo sapiens cDNA                         | 3490.2817 |
| 5739 | AA397529_at_GI_13994281-S      | Zt87g06.r1 Soares testis NHT Homo                         | 3490.2944 |
| 5740 | RC_AA412286_at_GI_27477069-S   | TBP-associated factor 172                                 | 3490.399  |
| 5741 | R60605_at_NA_illumina          | Yh14b06.r1 Homo sapiens cDNA clone                        | 3490.4138 |
| 5742 | Z48482_at_NA_illumina          | MMP2 Matrix metalloproteinase 2                           | 3490.4272 |
| 5743 | L27213_s_at_GI_4827015-A       | Anion exchange protein mRNA                               | 3490.4404 |
| 5744 | M22919_rna2_at_GI_17986259-A   | MLC gene (non-muscle myosin light chain)                  | 3490.4453 |
| 5745 | D78334_at_GI_9790006-S         | Ankyrin motif                                             | 3490.4734 |
| 5746 | L26953_at_NA_illumina          | RMSA1 Regulator of mitotic spindle                        | 3490.4958 |
| 5747 | RC_AA283786_at_NA_illumina     | EST: zt18f01.s1 Soares ovary tumor                        | 3490.554  |
| 5748 | HG3914-HT4184_s_at_NA_illumina | Cell Division Cycle Protein 2-Related                     | 3490.5647 |
| 5749 | RC_AA262604_at_GI_39725945-S   | EST: zs23f01.s1 NCI_CGAP_GCB1 Homo                        | 3490.58   |
| 5750 | U50383_at_GI_27481171-S        | Retinoic acid-responsive protein (NN8-                    | 3490.5928 |

|      |                              |                                           |           |
|------|------------------------------|-------------------------------------------|-----------|
| 5751 | X53595_s_at_GI_4557326-S     | APOH Apolipoprotein H                     | 3490.6082 |
| 5752 | RC_AA609172_at_GI_31542479-S | EST: af12b02.s1 Soares testis NHT Homo    | 3490.6592 |
| 5753 | RC_AA013231_at_NA_illumina   | EST: ze28h05.s1 Soares retina N2b4HR      | 3490.7373 |
| 5754 | RC_AA164589_at_GI_19923558-S | EST: zo92f10.s1 Stratagene ovarian        | 3490.7603 |
| 5755 | HG668-HT4793_at_NA_illumina  | T-Cell Factor 1, A/B/C, Alt. Splice 1, A  | 3490.7651 |
| 5756 | J05158_at_NA_illumina        | CARBOXYPEPTIDASE N 83 KD CHAIN            | 3490.7725 |
| 5757 | HG491-HT491_at_NA_illumina   | Fc Receptor lib3 For Igg, Low Affinity    | 3490.7837 |
| 5758 | L36644_at_GI_32967318-A      | Receptor protein-tyrosine kinase (HEK7)   | 3490.8528 |
| 5759 | D86096_cds6_at_NA_illumina   | EP3-IV gene extracted from Human DNA      | 3490.8691 |
| 5760 | L32866_at_GI_4502144-S       | Effector cell protease receptor-1 (EPR-1) | 3490.8994 |
| 5761 | HG921-HT3995_at_NA_illumina  | Serine/Threonine Kinase, Receptor 2-2,    | 3490.9102 |
| 5762 | AA214730_at_GI_21700762-S    | Human DNA sequence from clone 431H6       | 3490.9268 |
| 5763 | RC_AA236237_at_NA_illumina   | EST: zr51e03.s1 Soares NhHMPu S1          | 3491.0515 |
| 5764 | RC_AA232231_at_NA_illumina   | EST: zr25f05.s1 Stratagene NT2 neuronal   | 3491.0635 |
| 5765 | Z22780_at_GI_37546214-S      | CYLICIN                                   | 3491.0637 |
| 5766 | AA316036_at_NA_illumina      | CASP8 and FADD-like apoptosis regulator   | 3491.084  |
| 5767 | U65410_at_GI_6466452-S       | Mitotic feedback control protein Madp2    | 3491.1228 |
| 5768 | M81778_s_at_GI_4504540-S     | HTR2C 5-hydroxytryptamine (serotonin)     | 3491.1836 |
| 5769 | AF008442_at_GI_42560249-A    | RNA polymerase I subunit                  | 3491.1973 |
| 5770 | RC_AA262917_at_NA_illumina   | EST: zs26e11.s1 NCI_CGAP_GCB1             | 3491.2002 |
| 5771 | RC_AA489086_at_NA_illumina   | EST: aa56e05.s1 NCI_CGAP_GCB1             | 3491.2078 |
| 5772 | Z83805_at_GI_24308168-S      | Axonemal dynein heavy chain (partial, ID  | 3491.2424 |
| 5773 | D57823_at_NA_illumina        | H.sapiens mRNA for Sec23A isoform,        | 3491.2783 |
| 5774 | RC_AA017254_at_GI_22749518-S | EST: ze52b08.s1 Soares retina N2b4HR      | 3491.2866 |
| 5775 | N72380_s_at_NA_illumina      | EST: yv38f12.r1 Soares fetal liver spleen | 3491.3008 |
| 5776 | U40622_at_GI_12408643-A      | XRCC4 DNA repair protein XRCC4            | 3491.306  |
| 5777 | U28749_s_at_NA_illumina      | High-mobility group phosphoprotein        | 3491.309  |
| 5778 | H02480_at_NA_illumina        | EST: yj35e11.r1 Homo sapiens cDNA         | 3491.3267 |
| 5779 | RC_AA046406_at_NA_illumina   | EST: zk70b10.s1 Soares pregnant uterus    | 3491.334  |
| 5780 | Z47038_s_at_NA_illumina      | Partial cDNA sequence, clone x101,        | 3491.4028 |
| 5781 | T65508_at_NA_illumina        | Homo sapiens mRNA for KIAA0625            | 3491.4744 |
| 5782 | X61079_at_NA_illumina        | T cell receptor, clone IGRA24             | 3491.5657 |
| 5783 | C15810_at_NA_illumina        | EST: Human fetal brain cDNA 5'-end GEN-   | 3491.6265 |
| 5784 | L27071_at_GI_4507742-S       | TXK TXK tyrosine kinase                   | 3491.6768 |
| 5785 | AF015950_at_GI_38201699-A    | Telomerase reverse transcriptase (hTRT)   | 3491.719  |
| 5786 | RC_AA233553_at_GI_28395048-S | EST: zr43a11.s1 Soares NhHMPu S1          | 3491.7437 |
| 5787 | RC_AA233258_at_NA_illumina   | EST: zr48d01.s1 Soares NhHMPu S1          | 3491.7722 |
| 5788 | RC_AA598951_at_NA_illumina   | EST: ae37h03.s1 Gessler Wilms tumor       | 3491.7773 |
| 5789 | X77744_at_GI_38788301-I      | F11 mRNA                                  | 3491.781  |
| 5790 | M57506_rna1_at_GI_4506832-S  | SCYA1 gene (secreted protein I-309)       | 3491.8347 |
| 5791 | AA248884_at_GI_38570141-S    | K3517.seq.F Human fetal heart, Lambda     | 3491.8423 |
| 5792 | RC_AA400512_at_GI_7706688-S  | EST: zu70g04.s1 Soares testis NHT Homo    | 3491.9192 |
| 5793 | AA172291_at_GI_31543398-S    | EST: zo98e06.r1 Stratagene ovarian        | 3491.9714 |

|      |                              |                                            |           |
|------|------------------------------|--------------------------------------------|-----------|
| 5794 | L04490_at_GI_39725687-S      | (clone CC6) NADH-ubiquinone                | 3491.9863 |
| 5795 | RC_AA279467_at_NA_illumina   | EST: zs85g09.s1 NCI_CGAP_GCB1              | 3492.0044 |
| 5796 | X98482_at_NA_illumina        | TNNT2 gene exon 11                         | 3492.012  |
| 5797 | L76687_at_GI_4758477-S       | Grb14 mRNA                                 | 3492.0427 |
| 5798 | L76687_at-2_NA_illumina      | Growth factor receptor-bound protein 14    | 3492.0427 |
| 5799 | U62431_at_GI_4502822-S       | CHRNA2 Cholinergic receptor, nicotinic,    | 3492.0771 |
| 5800 | RC_AA034179_at_NA_illumina   | EST: zi06g11.s1 Soares fetal liver spleen  | 3492.1511 |
| 5801 | U88871_at_GI_4505730-S       | Peroxisome targeting signal 2 receptor     | 3492.1895 |
| 5802 | Y08136_at_GI_34147321-S      | ASM-like phosphodiesterase 3a              | 3492.1956 |
| 5803 | U66561_at_GI_24307934-S      | Kruppel-related zinc finger protein        | 3492.2722 |
| 5804 | T47519_at_NA_illumina        | Genethonin 1                               | 3492.3335 |
| 5805 | L39211_at_GI_4503020-S       | Mitochondrial carnitine                    | 3492.345  |
| 5806 | M33478_at_GI_32967589-A      | PHOSDUCIN                                  | 3492.3723 |
| 5807 | X05232_at_GI_13027803-S      | MMP3 Stromelysin                           | 3492.3752 |
| 5808 | D21205_at_NA_illumina        | Estrogen responsive finger protein         | 3492.3765 |
| 5809 | AA156215_at_GI_34328078-S    | EST: zo48h03.r1 Stratagene endothelial     | 3492.4102 |
| 5810 | AA431812_at_NA_illumina      | EST: zw79b04.r1 Soares testis NHT Homo     | 3492.4304 |
| 5811 | L10035_at_GI_4503062-S       | CRYBB2 Crystallin beta-B2                  | 3492.4531 |
| 5812 | L23959_at_GI_34147667-S      | E2F-related transcription factor (DP-1)    | 3492.4858 |
| 5813 | N75274_at_NA_illumina        | EST: yw36a03.r1 Homo sapiens cDNA          | 3492.5767 |
| 5814 | AA452003_at_GI_31341765-S    | EST: zv75e04.r1 Soares total fetus         | 3492.597  |
| 5815 | U37221_at_NA_illumina        | Cyclophilin-like protein mRNA, partial cds | 3492.642  |
| 5816 | R51517_at_GI_8923945-S       | Yg72d11.r1 Homo sapiens cDNA clone         | 3492.6812 |
| 5817 | U61167_at_GI_22325382-A      | SH3 domain-containing protein SH3P18       | 3492.6829 |
| 5818 | U22815_at_NA_illumina        | LAR-interacting protein 1a mRNA            | 3492.7053 |
| 5819 | U43148_at_GI_25121959-S      | PTCH Patched (Drosophila) homolog          | 3492.708  |
| 5820 | AB002296_at_NA_illumina      | KIAA0298 gene product                      | 3492.727  |
| 5821 | D83767_at_NA_illumina        | Clone N9 Rep-8 mRNA                        | 3492.7366 |
| 5822 | M54914_s_at_GI_4503790-S     | FOLLITROPIN BETA CHAIN                     | 3492.7866 |
| 5823 | W39063_at_GI_9994186-S       | EST: zb34c07.r1 Soares parathyroid tumor   | 3492.8433 |
| 5824 | X16609_s_at_GI_10947049-A    | ANK1 Ankyrin 1, erythrocytic               | 3492.8528 |
| 5825 | U31601_at_NA_illumina        | Janus kinase 3 (a protein tyrosine kinase, | 3492.8718 |
| 5826 | X06562_at_GI_4503992-S       | GHR Growth hormone receptor                | 3492.9373 |
| 5827 | D31815_at_GI_23111020-A      | SMP-30 (senescence marker protein-30)      | 3493.0044 |
| 5828 | U84551_cds2_at_NA_illumina   | Dystrobrevin (DTN) gene                    | 3493.0466 |
| 5829 | N29192_at_NA_illumina        | Yx42f05.r1 Homo sapiens cDNA clone         | 3493.0823 |
| 5830 | AFFX-BioB-5_at_NA_illumina   | AFFX-BioB-5_at (endogenous control)        | 3493.3267 |
| 5831 | AFFX-BioB-5_at-2_NA_illumina | AFFX-BioB-5_at (miscellaneous control -    | 3493.3267 |
| 5832 | HG1148-HT1148_at_NA_illumina | Lipopolysaccharide-Binding Protein         | 3493.3633 |
| 5833 | RC_AA009809_at_NA_illumina   | EST: zi04g05.s1 Soares fetal liver spleen  | 3493.3877 |
| 5834 | X92475_at-2_NA_illumina      | ITBA1 gene                                 | 3493.4175 |
| 5835 | X92475_at_GI_4504738-S       | ITBA1 protein                              | 3493.4175 |
| 5836 | M86407_at_GI_4557240-S       | ACTN3 Actinin alpha-3                      | 3493.4333 |



|      |                                |                                          |           |
|------|--------------------------------|------------------------------------------|-----------|
| 5837 | AA358888_at_GI_7657040-S       | EST: EST67818 Fetal lung II Homo         | 3493.495  |
| 5838 | AF006609_at_GI_19913391-A      | RGS3 mRNA, 5' UTR                        | 3493.5063 |
| 5839 | AA464029_at_GI_31542730-S      | Myosin, light polypeptide 5, regulatory  | 3493.51   |
| 5840 | RC_AA459985_at_NA_illumina     | EST: zx66e07.s1 Soares total fetus       | 3493.5283 |
| 5841 | M18079_at_GI_10938019-S        | FATTY ACID-BINDING PROTEIN,              | 3493.5784 |
| 5842 | R69673_at_GI_24497483-S        | EST: yi40e06.r1 Homo sapiens cDNA        | 3493.596  |
| 5843 | AA022985_at_GI_5729868-S       | EST: ze72g05.r1 Soares fetal heart       | 3493.6462 |
| 5844 | W33035_at_NA_illumina          | EST: zc08d02.r1 Soares parathyroid tumor | 3493.6758 |
| 5845 | RC_AA258576_at_NA_illumina     | EST: zr62f01.s1 Soares NhHMPu S1         | 3493.68   |
| 5846 | R22260_at_GI_31377561-S        | EST: yh26c06.r1 Homo sapiens cDNA        | 3493.7073 |
| 5847 | RC_AA132453_at_NA_illumina     | EST: zo20b01.s1 Stratagene colon         | 3493.712  |
| 5848 | W56487_at_NA_illumina          | Zc59c07.r1 Soares parathyroid tumor      | 3493.7861 |
| 5849 | M22489_at_GI_4557368-S         | BMP2 Bone morphogenetic protein 2        | 3493.8086 |
| 5850 | RC_AA065217_at_NA_illumina     | EST: zm51f01.s1 Stratagene fibroblast    | 3493.8508 |
| 5851 | D89501_at_NA_illumina          | PBI gene                                 | 3493.8655 |
| 5852 | D89501_at-2_NA_illumina        | Human PBI gene, complete cds             | 3493.8655 |
| 5853 | U66075_at_GI_40288196-S        | Transcription factor hGATA-6 mRNA        | 3493.875  |
| 5854 | RC_AA609125_at_GI_37655176-S   | Homo sapiens clone 23939 mRNA            | 3493.883  |
| 5855 | RC_AA398276_at_GI_21040331-A   | EST: zt60c07.s1 Soares testis NHT Homo   | 3493.9421 |
| 5856 | RC_AA019746_at_GI_38678523-S   | EST: ze62e06.s1 Soares retina N2b4HR     | 3494.0156 |
| 5857 | U19180_at_GI_4557346-S         | BAGE B melanoma antigen                  | 3494.0408 |
| 5858 | Z24459_rna1_at_GI_7657348-S    | H.sapiens MTCP1 gene, exons 2A to 7      | 3494.044  |
| 5859 | AA495729_at_NA_illumina        | EST: zw04a10.r1 Soares NhHMPu S1         | 3494.0815 |
| 5860 | N56451_at_GI_33598967-S        | Human zinc-finger domain-containing      | 3494.0876 |
| 5861 | AA399432_at_GI_9994198-S       | EST: zt60b01.r1 Soares testis NHT Homo   | 3494.0876 |
| 5862 | M74447_at_GI_9961247-A         | TAP2 Transporter 2, ABC (ATP binding)    | 3494.089  |
| 5863 | RC_AA416601_s_at_NA_illumina   | EST: zu18b03.s1 Soares NhHMPu S1         | 3494.103  |
| 5864 | K00629_i_at_NA_illumina        | Human kpni repeat mrna (cdna clone pcd-  | 3494.1655 |
| 5865 | X80343_at_GI_34304373-S        | CDK5 Cyclin-dependent kinase 5,          | 3494.1672 |
| 5866 | HG4165-HT4435_at_NA_illumina   | Hpc-1                                    | 3494.176  |
| 5867 | L08424_at_GI_4757787-S         | Achaete scute homologous protein (ASH1)  | 3494.187  |
| 5868 | N57359_at_GI_34147379-S        | EST: yw86f09.r1 Homo sapiens cDNA        | 3494.202  |
| 5869 | W78181_at_NA_illumina          | EST: zd68a06.r1 Soares fetal heart       | 3494.209  |
| 5870 | H52390_at_NA_illumina          | EST: yq81d12.r1 Homo sapiens cDNA        | 3494.2146 |
| 5871 | RC_AA280724_at_NA_illumina     | EST: zs96g06.s1 NCI_CGAP_GCB1            | 3494.3716 |
| 5872 | M86808_at_GI_38492354-S        | Pyruvate dehydrogenase complex           | 3494.377  |
| 5873 | Z98497_at_NA_illumina          | EST: Homo sapiens mRNA; expressed        | 3494.4624 |
| 5874 | Y07759_at_NA_illumina          | Myosin heavy chain 12                    | 3494.4722 |
| 5875 | U28249_at_GI_11612675-A        | MAT8 protein                             | 3494.484  |
| 5876 | R20949_at_GI_21314643-S        | EST: yg06b04.r1 Homo sapiens cDNA        | 3494.4941 |
| 5877 | RC_AA476604_f_at_GI_42476029-S | EST: zx03d08.s1 Soares total fetus       | 3494.6338 |
| 5878 | D31886_at_NA_illumina          | KIAA0066 gene, partial cds               | 3494.641  |
| 5879 | X98330_at_GI_4506756-S         | RYR2 Ryanodine receptor 2 (cardiac)      | 3494.7683 |

|      |                               |                                              |           |
|------|-------------------------------|----------------------------------------------|-----------|
| 5880 | X98330_at-2_NA_illumina       | Ryanodine receptor 2 (cardiac)               | 3494.7683 |
| 5881 | RC_AA037415_at_GI_14249703-S  | EST: zk33a09.s1 Soares pregnant uterus       | 3494.8188 |
| 5882 | X58822_rna1_s_at_GI_4504604-S | IFN-omega 1 gene for interferon-omega 1      | 3494.825  |
| 5883 | R00641_at_NA_illumina         | EST: ye74h08.r1 Homo sapiens cDNA            | 3494.8457 |
| 5884 | AA164810_s_at_NA_illumina     | EST: zo99f09.r1 Stratagene ovarian           | 3494.8704 |
| 5885 | AA425719_at_NA_illumina       | EST: zv47f04.r1 Soares ovary tumor           | 3494.8767 |
| 5886 | RC_AA406640_s_at_NA_illumina  | EST: zv15e12.s1 Soares NhHMPu S1             | 3494.9265 |
| 5887 | X64810_at_GI_20336241-S       | PCSK1 Proprotein convertase                  | 3494.9714 |
| 5888 | X87843_at_GI_4505224-S        | Cyclin H assembly factor                     | 3494.9731 |
| 5889 | D50923_at_GI_7661931-S        | KIAA0133 gene                                | 3494.9792 |
| 5890 | X92368_at_NA_illumina         | Ncx1 gene (exon 1)                           | 3494.9885 |
| 5891 | AA280227_at_NA_illumina       | EST: zt04c10.r1 NCI_CGAP_GCB1 Homo           | 3495.017  |
| 5892 | U22816_at_NA_illumina         | LAR-interacting protein 1b mRNA              | 3495.0273 |
| 5893 | RC_AA446204_at_NA_illumina    | EST: zw66d10.s1 Soares testis NHT            | 3495.0786 |
| 5894 | RC_AA421778_at_NA_illumina    | EST: zu26a01.s1 Soares ovary tumor           | 3495.1204 |
| 5895 | M19154_at_GI_4507462-S        | Transforming growth factor-beta-2 mRNA       | 3495.1462 |
| 5896 | J03778_s_at_GI_8400714-A      | MICROTUBULE-ASSOCIATED PROTEIN               | 3495.1758 |
| 5897 | RC_AA481420_at_GI_21362095-S  | EST: zv06d09.s1 Soares NhHMPu S1             | 3495.2522 |
| 5898 | X85753_at_GI_4502744-S        | CELL DIVISION PROTEIN KINASE 8               | 3495.26   |
| 5899 | RC_AA281753_at_NA_illumina    | Inositol 1,4,5-triphosphate receptor, type 3 | 3495.2742 |
| 5900 | L78833_cds2_at_NA_illumina    | Rho7 gene extracted from Human BRCA1,        | 3495.2769 |
| 5901 | RC_AA064627_at_NA_illumina    | EST: zf72b06.s1 Soares pineal gland          | 3495.3215 |
| 5902 | RC_AA148521_at_NA_illumina    | EST: zl06h05.s1 Soares pregnant uterus       | 3495.3242 |
| 5903 | RC_AA028890_at_NA_illumina    | EST: zk11f01.s1 Soares pregnant uterus       | 3495.344  |
| 5904 | M31423_s_at_GI_44889482-S     | Cerebellar degeneration-associated           | 3495.4143 |
| 5905 | U01317_cds1_at_GI_28302129-S  | Epsilon-globin gene extracted from Human     | 3495.447  |
| 5906 | M87499_at_GI_10863950-S       | UNG Uracil-DNA glycosylase                   | 3495.4492 |
| 5907 | U12778_at_GI_38373685-S       | ACADSB Acyl-coA dehydrogenase                | 3495.4514 |
| 5908 | RC_AA403121_at_NA_illumina    | EST: zv66e11.s1 Soares total fetus           | 3495.512  |
| 5909 | AA071381_at_NA_illumina       | EST: zm61d03.r1 Stratagene fibroblast        | 3495.5142 |
| 5910 | U94832_at_NA_illumina         | KH type splicing regulatory protein KSRP     | 3495.5378 |
| 5911 | RC_D60024_s_at_GI_4758613-S   | EST: Human fetal brain cDNA 3'-end GEN-      | 3495.5857 |
| 5912 | AA410925_at_NA_illumina       | EST: zv39e11.r1 Soares ovary tumor           | 3495.6008 |
| 5913 | U95626_rna1_at_NA_illumina    | Ccr2 gene (ccr2a) extracted from Homo        | 3495.6245 |
| 5914 | RC_D59630_at_NA_illumina      | EST: Human fetal brain cDNA 3'-end GEN-      | 3495.6594 |
| 5915 | RC_AA252395_at_GI_7669553-S   | EST: zs12g10.s1 NCI_CGAP_GCB1                | 3495.679  |
| 5916 | D78514_at_GI_33359696-A       | Ubiquitin-conjugating enzyme                 | 3495.6865 |
| 5917 | AA169546_at_NA_illumina       | EST: zo89b08.r1 Stratagene ovarian           | 3495.693  |
| 5918 | RC_AA047876_at_GI_5031696-S   | EST: zf50b08.s1 Soares retina N2b4HR         | 3495.7388 |
| 5919 | W28406_at_NA_illumina         | EST: 46e2 Human retina cDNA randomly         | 3495.78   |
| 5920 | S79281_at_NA_illumina         | Pancreatic ribonuclease [human, mRNA         | 3495.798  |
| 5921 | H87695_at_GI_14861835-A       | EST: yw15g03.r1 Homo sapiens cDNA            | 3495.8215 |
| 5922 | Z73497_at_NA_illumina         | DNA sequence from clone U240C2 on            | 3495.8423 |

|      |                                |                                            |           |
|------|--------------------------------|--------------------------------------------|-----------|
| 5923 | RC_D60272_i_at_GI_18641359-A   | EST: Human fetal brain cDNA 3'-end GEN-    | 3495.8762 |
| 5924 | AA459155_at_GI_41350205-S      | EST: aa26h04.r1 NCI_CGAP_GCB1              | 3495.8906 |
| 5925 | X63597_at_GI_4506944-S         | SI Sucrase-isomaltase                      | 3495.893  |
| 5926 | U09413_at_GI_34419632-S        | ZNF135 Zinc finger protein 135 (clone pHZ- | 3496.009  |
| 5927 | RC_AA007170_at_NA_illumina     | EST: 13cDNA84-3.seq Soares fetal liver     | 3496.033  |
| 5928 | U41813_at_GI_24497558-A        | HOXA9 Homeo box A9                         | 3496.0354 |
| 5929 | U67611_at-2_NA_illumina        | Mouse transaldolase gene mRNA,             | 3496.0398 |
| 5930 | U67611_at_NA_illumina          | Mouse transaldolase gene mRNA              | 3496.0398 |
| 5931 | RC_AA009832_at_NA_illumina     | EST: zi07b02.s1 Soares fetal liver spleen  | 3496.069  |
| 5932 | U16261_at_GI_31317245-A        | MDA-7 (mda-7) mRNA                         | 3496.1453 |
| 5933 | U60276_at_GI_4757795-S         | HASNA-I mRNA                               | 3496.1997 |
| 5934 | X93017_at_GI_33946307-A        | Ncx2 gene (exon 2)                         | 3496.2144 |
| 5935 | Y10256_at_GI_4505396-S         | Serine/threonine protein kinase, NIK       | 3496.2253 |
| 5936 | U90552_at_GI_37221188-A        | Butyrophilin (BTF5) mRNA                   | 3496.246  |
| 5937 | RC_AA430026_at_NA_illumina     | EST: zw65e11.s1 Soares testis NHT          | 3496.2478 |
| 5938 | RC_D19663_at_NA_illumina       | EST: Human HL60 3'directed Mbol cDNA,      | 3496.4329 |
| 5939 | U74324_at_NA_illumina          | Guanine nucleotide exchange factor mss4    | 3496.4392 |
| 5940 | W39190_at_NA_illumina          | EST: zb35f04.r1 Soares parathyroid tumor   | 3496.4722 |
| 5941 | U94333_at-2_NA_illumina        | Human Clq/MBL/SPA receptor C1qR(p)         | 3496.5461 |
| 5942 | U94333_at_GI_11496985-S        | Clq/MBL/SPA receptor C1qR(p) mRNA          | 3496.5461 |
| 5943 | AF004715_at_GI_22547223-S      | Jerky (mouse) homolog-like                 | 3496.5535 |
| 5944 | U60415_at_NA_illumina          | BHLH-PAS protein JAP3 mRNA                 | 3496.5667 |
| 5945 | RC_AA158386_at_NA_illumina     | EST: zo66c01.s1 Stratagene pancreas        | 3496.5825 |
| 5946 | X63097_at_GI_20336226-A        | RHD Rhesus blood group, D antigen          | 3496.5996 |
| 5947 | D83260_s_at_NA_illumina        | HXC-26 mRNA                                | 3496.6533 |
| 5948 | M77481_rna1_f_at_GI_29029615-S | Antigen (MAGE-1) gene                      | 3496.6677 |
| 5949 | RC_AA233322_at_NA_illumina     | EST: zr69h06.s1 Soares NhHMPu S1           | 3496.699  |
| 5950 | D26561_cds3_at_NA_illumina     | ORF for E7 protein gene extracted from     | 3496.711  |
| 5951 | W07142_at_NA_illumina          | EST: za92c10.r1 Soares fetal lung          | 3496.726  |
| 5952 | X93595_f_at_GI_5803051-S       | MHC CLASS I NK CELL RECEPTOR               | 3496.7495 |
| 5953 | U43843_at_GI_4758797-S         | H-neuro-d4 protein mRNA                    | 3496.8147 |
| 5954 | AA249620_at_GI_30795185-A      | EST: k3182.seq.F Human fetal heart,        | 3496.8203 |
| 5955 | U53174_at_GI_19924112-S        | PPP1CA Protein phosphatase 1, catalytic    | 3496.8403 |
| 5956 | AFFX-CreX-3_at-2_NA_illumina   | AFFX-CreX-3_at (miscellaneous control -    | 3496.8508 |
| 5957 | AFFX-CreX-3_at_NA_illumina     | AFFX-CreX-3_at (endogenous control)        | 3496.8508 |
| 5958 | AA282944_at_NA_illumina        | EST: zt15g08.r1 NCI_CGAP_GCB1 Homo         | 3496.8772 |
| 5959 | U64871_at_GI_5453665-S         | G protein-coupled receptor GPR-NGA         | 3496.8943 |
| 5960 | M21188_at_GI_4826769-S         | INSULIN-DEGRADING ENZYME                   | 3496.895  |
| 5961 | L24804_at_NA_illumina          | (p23) mRNA                                 | 3496.9062 |
| 5962 | HG1996-HT2044_at_NA_illumina   | Guanine Nucleotide-Binding Protein Rap2,   | 3496.9062 |
| 5963 | RC_AA400591_at_GI_28872727-A   | Proteasome (prosome, macropain) 26S        | 3496.969  |
| 5964 | W89109_at_NA_illumina          | EST: zh71g07.r1 Soares fetal liver spleen  | 3497.055  |
| 5965 | RC_AA608592_at_NA_illumina     | EST: ae54e10.s1 Stratagene lung            | 3497.065  |

|      |                              |                                            |           |
|------|------------------------------|--------------------------------------------|-----------|
| 5966 | X95654_at_GI_34878903-S      | SCP1 protein                               | 3497.133  |
| 5967 | M60052_at_GI_4504486-S       | HRC Histidine-rich calcium binding protein | 3497.1956 |
| 5968 | RC_AA460221_at_NA_illumina   | EST: zx67a02.s1 Soares total fetus         | 3497.2349 |
| 5969 | X04898_rna1_at_GI_4502148-S  | Apolipoprotein All                         | 3497.2778 |
| 5970 | X66922_at_GI_8393607-S       | MYO-INOSITOL-1(OR 4)-                      | 3497.2898 |
| 5971 | RC_AA446943_at_GI_38327030-A | EST: zw85c10.s1 Soares total fetus         | 3497.3035 |
| 5972 | RC_AA485945_at_NA_illumina   | EST: ab40g02.s1 Stratagene HeLa cell s3    | 3497.3223 |
| 5973 | S76067_at_GI_42718010-S      | CNG2=cyclic nucleotide-gated cation        | 3497.3616 |
| 5974 | U73704_at_GI_16933538-A      | 48 kDa FKBP-associated protein FAP48       | 3497.385  |
| 5975 | L11931_at_GI_22547188-A      | SHMT1 Serine hydroxymethyltransferase 1    | 3497.3933 |
| 5976 | RC_AA599583_at_NA_illumina   | Homo sapiens mRNA for HIS1 protein,        | 3497.4412 |
| 5977 | AF000959_at_GI_38570041-S    | Transmembrane protein mRNA                 | 3497.4656 |
| 5978 | C16494_at_GI_40255024-S      | Receptor-interacting serine-threonine      | 3497.483  |
| 5979 | AA361094_at_NA_illumina      | EST: EST70320 T-cell lymphoma Homo         | 3497.581  |
| 5980 | W03007_at_NA_illumina        | Human HIV1 tata element modulatory         | 3497.6257 |
| 5981 | D21878_at_GI_4757873-S       | BST-1                                      | 3497.6658 |
| 5982 | RC_AA417086_at_GI_13899234-S | EST: zu13c11.s1 Soares testis NHT Homo     | 3497.6694 |
| 5983 | C18429_at_GI_30795120-A      | EST: Human placenta cDNA 5'-end GEN-       | 3497.6863 |
| 5984 | AA285229_at_NA_illumina      | PMY0709 KG1-a Lambda Zap Express           | 3497.7263 |
| 5985 | J02843_at_NA_illumina        | CYP2E Cytochrome P450, subfamily IIE       | 3497.8254 |
| 5986 | U28368_at_GI_19923138-S      | ID4 Inhibitor of DNA binding 4, dominant   | 3497.844  |
| 5987 | M73746_s_at_GI_4557716-S     | LHCGR Luteinizing                          | 3497.8691 |
| 5988 | D50402_at_GI_40254427-S      | NRAMP1 Natural resistance-associated       | 3497.914  |
| 5989 | U10473_s_at_NA_illumina      | Clone p4betaGT/3 beta-1,4-                 | 3497.9216 |
| 5990 | RC_D59942_at_NA_illumina     | EST: Human fetal brain cDNA 3'-end GEN-    | 3497.9219 |
| 5991 | U58496_s_at_NA_illumina      | Dual-specificity tyrosine-(Y)-             | 3497.9438 |
| 5992 | R56174_at_GI_38148698-S      | EST: yg91d04.r1 Homo sapiens cDNA          | 3497.9749 |
| 5993 | W02342_at_GI_5729771-S       | Homo sapiens putative transmembrane        | 3498.022  |
| 5994 | M14159_cds2_at_NA_illumina   | T-cell receptor beta-chain J2.1 gene       | 3498.0408 |
| 5995 | X13451_s_at_NA_illumina      | B-CELL ANTIGEN RECEPTOR                    | 3498.0654 |
| 5996 | D14533_at_GI_31543966-S      | XPA Xeroderma pigmentosum,                 | 3498.074  |
| 5997 | L06147_at_GI_30089938-S      | (clone SY11) golgin-95 mRNA                | 3498.1113 |
| 5998 | RC_AA045778_at_NA_illumina   | EST: zk75g01.s1 Soares pregnant uterus     | 3498.1821 |
| 5999 | AA344417_at_NA_illumina      | Alpha-1-antichymotrypsin                   | 3498.1975 |
| 6000 | RC_AA084318_at_NA_illumina   | EST: zn18b04.s1 Stratagene                 | 3498.208  |
| 6001 | AF000430_at_GI_6996006-A     | Dynamin-like protein mRNA                  | 3498.257  |
| 6002 | AA402121_at_NA_illumina      | EST: zt67e02.r1 Soares testis NHT Homo     | 3498.2703 |
| 6003 | U81602_at_NA_illumina        | Eyes absent (Drosophila) homolog 3         | 3498.2866 |
| 6004 | RC_AA435896_at_NA_illumina   | EST: zt80e12.s1 Soares testis NHT Homo     | 3498.2905 |
| 6005 | M99564_at_GI_4557810-S       | P PROTEIN                                  | 3498.364  |
| 6006 | J04970_at_GI_38327525-A      | CPM Carboxypeptidase M                     | 3498.407  |
| 6007 | RC_AA460967_at_NA_illumina   | EST: zx63c02.s1 Soares total fetus         | 3498.4136 |
| 6008 | L43821_at_GI_33667052-A      | Enhancer of filamentation (HEF1) mRNA      | 3498.4153 |

|      |                                |                                            |           |
|------|--------------------------------|--------------------------------------------|-----------|
| 6009 | AA074897_at_NA_illumina        | Zm85a05.r1 Stratagene ovarian cancer       | 3498.4763 |
| 6010 | AA357394_at_GI_27486087-S      | EST: EST66127 Kidney IX Homo sapiens       | 3498.4775 |
| 6011 | X79510_at_GI_18375656-S        | Protein-tyrosine-phosphatase D1            | 3498.5818 |
| 6012 | X79510_at-2_NA_illumina        | H.sapiens mRNA for protein-tyrosine-       | 3498.5818 |
| 6013 | D50582_at_GI_25777631-S        | Inward rectifier K channel                 | 3498.5967 |
| 6014 | HG4169-HT4439_s_at_NA_illumina | Syntaxin 1b                                | 3498.603  |
| 6015 | W30683_at_NA_illumina          | Homo sapiens mRNA for GS3786,              | 3498.652  |
| 6016 | AA091099_at_GI_34222217-S      | EST: cchn1309.seq.F Fetal heart, Lambda    | 3498.6714 |
| 6017 | AB002294_at_NA_illumina        | KIAA0296 gene product                      | 3498.6907 |
| 6018 | U72508_at_GI_42542401-A        | B7 mRNA                                    | 3498.71   |
| 6019 | U72508_at-2_NA_illumina        | Human B7 mRNA, complete cds                | 3498.71   |
| 6020 | RC_AA406615_at_NA_illumina     | EST: zv15c05.s1 Soares NhHMPu S1           | 3498.71   |
| 6021 | N77606_at_NA_illumina          | Homo sapiens clone 23568, 23621, 23795,    | 3498.761  |
| 6022 | X13766_s_at_NA_illumina        | CSN2 Beta-casein                           | 3498.784  |
| 6023 | AB002325_at_NA_illumina        | KIAA0327 gene product                      | 3498.8276 |
| 6024 | RC_AA152335_at_NA_illumina     | EST: zo29h12.s1 Stratagene colon           | 3498.8499 |
| 6025 | AA279546_at_NA_illumina        | EST: zs86b06.r1 NCI_CGAP_GCB1 Homo         | 3498.8872 |
| 6026 | RC_AA150502_at_GI_22748754-S   | EST: zl08g03.s1 Soares pregnant uterus     | 3498.9163 |
| 6027 | M20218_at_GI_9961352-A         | F11 Coagulation factor XI (plasma          | 3498.9426 |
| 6028 | AA159673_at_GI_23397486-S      | EST: zo80a02.r1 Stratagene ovarian         | 3498.994  |
| 6029 | RC_AA488857_at_NA_illumina     | Homo sapiens clone 24583 mRNA              | 3499.0159 |
| 6030 | AA203513_at_NA_illumina        | EST: zx56b11.r1 Soares fetal liver spleen  | 3499.0396 |
| 6031 | AA180854_at_GI_24430178-S      | EST: zp35h03.r1 Stratagene muscle          | 3499.042  |
| 6032 | RC_AA029441_at_NA_illumina     | EST: ze96c08.s1 Soares fetal heart         | 3499.0535 |
| 6033 | RC_AA424806_at_NA_illumina     | Biphenyl hydrolase-like (serine hydrolase) | 3499.082  |
| 6034 | W36279_at_NA_illumina          | EST: HFBEST-56 Human fetal brain           | 3499.1116 |
| 6035 | Z21244_at_NA_illumina          | Homo sapiens brain expressed ring finger   | 3499.128  |
| 6036 | HG3513-HT3707_at_NA_illumina   | Myosin, Heavy Polypeptide, Light           | 3499.1426 |
| 6037 | D13168_at_GI_4503466-A         | EDNRB Endothelin receptor type B           | 3499.1763 |
| 6038 | U79277_at_NA_illumina          | Clone 23548 mRNA sequence                  | 3499.178  |
| 6039 | AB000463_s_at_NA_illumina      | SH3-domain binding protein 2               | 3499.2007 |
| 6040 | RC_AA405501_at_NA_illumina     | EST: zw36d10.s1 Soares total fetus         | 3499.2507 |
| 6041 | U63973_at_NA_illumina          | Rhodopsin kinase                           | 3499.2773 |
| 6042 | T88845_at_GI_21687071-S        | EST: yd90c09.r1 Homo sapiens cDNA          | 3499.3472 |
| 6043 | M14123_xpt1_at_NA_illumina     | Pol from Human endogenous retrovirus       | 3499.3643 |
| 6044 | AA255509_at_GI_14249503-S      | EST: zr85c02.r1 Soares NhHMPu S1           | 3499.4014 |
| 6045 | RC_AA482031_at_NA_illumina     | Ribosomal protein L37                      | 3499.4375 |
| 6046 | RC_AA007522_at_NA_illumina     | EST: zh98f09.s1 Soares fetal liver spleen  | 3499.4834 |
| 6047 | RC_AA243617_at_NA_illumina     | EST: zs16c08.s1 NCI_CGAP_GCB1              | 3499.5156 |
| 6048 | U69114_at_NA_illumina          | EST: Human Down syndrome region, YAC       | 3499.5664 |
| 6049 | RC_AA421046_at_NA_illumina     | EST: zu09f09.s1 Soares testis NHT Homo     | 3499.5771 |
| 6050 | RC_AA490461_at_NA_illumina     | EST: aa45a12.s1 Soares NhHMPu S1           | 3499.6147 |
| 6051 | AA447244_at_GI_38201616-A      | KIAA0740 gene product                      | 3499.6313 |

|      |                                |                                              |           |
|------|--------------------------------|----------------------------------------------|-----------|
| 6052 | RC_AA020005_at_NA_illumina     | EST: ze62e11.s1 Soares retina N2b4HR         | 3499.7031 |
| 6053 | D61469_at_NA_illumina          | EST: Human fetal brain cDNA 5'-end GEN-      | 3499.7246 |
| 6054 | U11037_at-2_NA_illumina        | Sel-1 (suppressor of lin-12, C.elegans)-like | 3499.7297 |
| 6055 | U11037_at_GI_19923668-S        | Sel-1 like mRNA                              | 3499.7297 |
| 6056 | AA090778_at_NA_illumina        | EST: yy0416.seq.F Fetal heart, Lambda        | 3499.7485 |
| 6057 | X99947_at_GI_4758175-A         | mRNA dynein-related protein                  | 3499.8162 |
| 6058 | U18550_at_NA_illumina          | PROBABLE G PROTEIN-COUPLED                   | 3499.866  |
| 6059 | W27720_at_GI_45243537-A        | Protocadherin 9                              | 3499.8823 |
| 6060 | H17239_at_NA_illumina          | EST: ym42f05.r1 Homo sapiens cDNA            | 3499.886  |
| 6061 | RC_AA349998_at_GI_38257143-S   | EST: EST57271 Infant brain Homo              | 3499.8923 |
| 6062 | RC_AA451671_at_GI_21361092-S   | Tyrosylprotein sulfotransferase 1            | 3499.8945 |
| 6063 | T19399_at_GI_24430147-A        | Nucleoporin 155kD                            | 3499.9602 |
| 6064 | AA419502_at_GI_23308540-S      | EST: zv03b02.r1 Soares NhHMPu S1             | 3499.985  |
| 6065 | RC_AA024750_at_NA_illumina     | EST: ze76d11.s1 Soares fetal heart           | 3499.9944 |
| 6066 | RC_AA176496_at_NA_illumina     | EST: zp33e05.s1 Stratagene muscle            | 3500.0022 |
| 6067 | D86968_at_GI_6031179-A         | KIAA0213 gene, partial cds                   | 3500.0144 |
| 6068 | M63256_at_GI_18598508-S        | CDR2 Cerebellar degeneration-related         | 3500.0298 |
| 6069 | RC_AA059014_at_NA_illumina     | EST: zf63e06.s1 Soares retina N2b4HR         | 3500.037  |
| 6070 | AA188555_at_GI_23503270-S      | EST: zp78e11.r1 Stratagene HeLa cell s3      | 3500.0637 |
| 6071 | U08191_s_at_GI_23346419-S      | R kappa B mRNA                               | 3500.217  |
| 6072 | RC_AA446912_at_NA_illumina     | EST: zw90f09.s1 Soares total fetus           | 3500.2527 |
| 6073 | X12662_rna1_at_GI_10947138-S   | Arginase gene exon 1 and flanking regions    | 3500.2778 |
| 6074 | X98337_s_at_NA_illumina        | Complement factor H-related protein 4        | 3500.291  |
| 6075 | L41913_at_NA_illumina          | Retinoblastoma susceptibility protein        | 3500.3396 |
| 6076 | U41737_at_NA_illumina          | Pancreatic beta cell growth factor (INGAP)   | 3500.4153 |
| 6077 | U00001_s_at_NA_illumina        | CDC27 Cell division cycle 27                 | 3500.4683 |
| 6078 | L49218_f_at_NA_illumina        | RB1 Retinoblastoma 1 (including              | 3500.4714 |
| 6079 | W26448_at_GI_19913437-S        | KIAA0002 gene product                        | 3500.4854 |
| 6080 | AA203440_at_GI_24432092-S      | EST: zx56e08.r1 Soares fetal liver spleen    | 3500.53   |
| 6081 | N44757_at_NA_illumina          | EST: yy38c10.r1 Homo sapiens cDNA            | 3500.5547 |
| 6082 | M82919_at_GI_30061561-A        | GABRB3 Gamma-aminobutyric acid               | 3500.5574 |
| 6083 | X06389_at_GI_27764866-S        | SYP Synaptophysin                            | 3500.63   |
| 6084 | RC_AA019528_at_NA_illumina     | EST: ze55b02.s1 Soares retina N2b4HR         | 3500.6382 |
| 6085 | L20348_at_GI_12707573-S        | Oncomodulin gene                             | 3500.641  |
| 6086 | S79048_at_NA_illumina          | LPRP=pHL E1F1 [human, lacrimal gland,        | 3500.7131 |
| 6087 | HG2260-HT2349_s_at_NA_illumina | Duchenne Muscular Dystrophy Protein          | 3500.721  |
| 6088 | RC_AA253442_at_GI_14149626-S   | Homo sapiens mRNA for KIAA0529               | 3500.7612 |
| 6089 | L22005_at_GI_16357476-S        | UBIQUITIN-CONJUGATING ENZYME E2-             | 3500.7913 |
| 6090 | T49775_at_NA_illumina          | EST: ya80g07.r1 Homo sapiens cDNA            | 3500.811  |
| 6091 | L31573_at_GI_4557866-S         | Sulfite oxidase mRNA                         | 3500.8115 |
| 6092 | D87684_at_GI_34222095-S        | KIAA0242 gene, partial cds                   | 3500.846  |
| 6093 | X93510_at_GI_19923180-S        | 37 kDa LIM domain protein                    | 3500.9253 |
| 6094 | RC_AA042823_at_GI_38201668-S   | Inhibitor of growth 1-like                   | 3501.0312 |

|      |                              |                                                       |           |
|------|------------------------------|-------------------------------------------------------|-----------|
| 6095 | U93869_at_GI_33598951-S      | Human RNA polymerase III subunit                      | 3501.0725 |
| 6096 | T40348_s_at_GI_7705343-S     | EST: ya32f01.r3 Homo sapiens cDNA                     | 3501.101  |
| 6097 | V01514_at_NA_illumina        | AFP Alpha-fetoprotein                                 | 3501.157  |
| 6098 | D85423_at_GI_16357499-S      | Cdc5, partial cds                                     | 3501.1782 |
| 6099 | RC_AA461300_at_NA_illumina   | EST: zx65a08.s1 Soares total fetus                    | 3501.251  |
| 6100 | U94354_at_NA_illumina        | Lunatic fringe (Drosophila) homolog                   | 3501.2637 |
| 6101 | D80011_at_GI_31543658-S      | KIAA0189 gene                                         | 3501.345  |
| 6102 | D80011_at-2_NA_illumina      | KIAA0189 gene product                                 | 3501.345  |
| 6103 | AA082023_at_GI_38176284-S    | EST: zn35d10.r1 Stratagene endothelial                | 3501.3618 |
| 6104 | U00951_at_GI_38202203-S      | Clone A9A2BR11 (CAC)n/(GTG)n repeat-                  | 3501.368  |
| 6105 | U00951_at-2_NA_illumina      | Human clone A9A2BR11 (CAC)n/(GTG)n                    | 3501.368  |
| 6106 | M91368_s_at_GI_10863912-S    | Na <sup>+</sup> /Ca <sup>+</sup> exchanger (CNC) mRNA | 3501.3743 |
| 6107 | L08485_at_GI_6031207-S       | GABRA5 Gamma-aminobutyric acid                        | 3501.4382 |
| 6108 | W69970_at_NA_illumina        | EST: zd52f04.r1 Soares fetal heart                    | 3501.4685 |
| 6109 | D38503_at_NA_illumina        | PMS8 mRNA (yeast mismatch repair gene                 | 3501.5166 |
| 6110 | AA018852_at_GI_22748830-S    | EST: ze55a07.r1 Soares retina N2b4HR                  | 3501.518  |
| 6111 | RC_AA495840_at_NA_illumina   | EST: zw05f11.s1 Soares NhHMPu S1                      | 3501.6062 |
| 6112 | W40213_at_NA_illumina        | Homo sapiens mRNA for KIAA0784                        | 3501.6343 |
| 6113 | RC_AA195698_at_NA_illumina   | EST: zr33b04.s1 Soares NhHMPu S1                      | 3501.636  |
| 6114 | X15088_at_NA_illumina        | GUANINE NUCLEOTIDE-BINDING                            | 3501.6484 |
| 6115 | M86383_s_at_NA_illumina      | Nicotinic acetylcholine receptor alpha 3              | 3501.6738 |
| 6116 | R84733_at_GI_10864024-S      | EST: yt68b09.r1 Soares retina N2b4HR                  | 3501.68   |
| 6117 | U88326_at_GI_4507232-S       | JAK binding protein                                   | 3501.6863 |
| 6118 | RC_C14801_at_GI_38045950-S   | EST: Human fetal brain cDNA 3'-end GEN-               | 3501.6868 |
| 6119 | J05459_at_GI_39995110-S      | GSTM3 Glutathione S-transferase M3                    | 3501.7134 |
| 6120 | M35851_s_at_NA_illumina      | AR Androgen receptor                                  | 3501.7444 |
| 6121 | M34065_at_GI_12408657-A      | CDC25C Cell division cycle 25C                        | 3501.7524 |
| 6122 | AA478131_at_GI_38455407-S    | EST: zu42c10.r1 Soares ovary tumor                    | 3501.761  |
| 6123 | M73481_at_GI_4885360-S       | GRPR Gastrin-releasing peptide receptor               | 3501.8218 |
| 6124 | X77166_at_NA_illumina        | Kunitz-type protease inhibitor, HKIB9                 | 3501.89   |
| 6125 | C17384_at_NA_illumina        | Homo sapiens mRNA for KIAA0875                        | 3501.9001 |
| 6126 | R51809_at_NA_illumina        | EST: yg77g09.r1 Homo sapiens cDNA                     | 3501.9043 |
| 6127 | Z83735_at_GI_15718725-S      | HH3/k gene                                            | 3501.919  |
| 6128 | AA021124_at_NA_illumina      | EST: ze67f10.r1 Soares retina N2b4HR                  | 3502.0889 |
| 6129 | RC_AA017167_at_GI_32441270-S | EST: ze41d08.s1 Soares retina N2b4HR                  | 3502.0972 |
| 6130 | X98206_at_GI_40068463-A      | UV-B repressed sequence, HUR 8                        | 3502.0989 |
| 6131 | RC_AA255425_at_NA_illumina   | EST: zr85f01.s1 Soares NhHMPu S1                      | 3502.124  |
| 6132 | U53506_at_GI_7549804-A       | Type II iodothyronine deiodinase mRNA                 | 3502.1663 |
| 6133 | U25138_at_GI_25777641-S      | MaxiK potassium channel beta subunit                  | 3502.1663 |
| 6134 | U43328_at_GI_40254458-S      | CRTL1 Cartilage linking protein 1                     | 3502.17   |
| 6135 | U51003_s_at_NA_illumina      | DLX-2 (DLX-2) gene                                    | 3502.1777 |
| 6136 | D50930_at_NA_illumina        | KIAA0140 gene                                         | 3502.178  |
| 6137 | HG862-HT862_s_at_NA_illumina | Transition Protein 2                                  | 3502.1826 |

|      |                              |                                             |           |
|------|------------------------------|---------------------------------------------|-----------|
| 6138 | U57627_at_GI_21396492-A      | OCRL Oculocerebrorenal syndrome (lowe       | 3502.2588 |
| 6139 | U92074_at_GI_19924116-A      | RAD51 (S. cerevisiae)-like 1                | 3502.2598 |
| 6140 | L39060_at_GI_21536361-A      | Transcription factor SL1 mRNA               | 3502.292  |
| 6141 | L39060_at-2_NA_illumina      | Homo sapiens transcription factor SL1       | 3502.292  |
| 6142 | U12259_cds2_s_at_NA_illumina | Paired box homeotic protein (PAX3) gene     | 3502.2976 |
| 6143 | L41143_at_GI_11560140-S      | Expressed pseudo TCTA mRNA at t(1;3)        | 3502.2988 |
| 6144 | RC_AA487054_at_NA_illumina   | EST: ab18e01.s1 Stratagene lung             | 3502.3496 |
| 6145 | X92689_at_GI_9945386-S       | UDP-GalNAc:polypeptide N-                   | 3502.4597 |
| 6146 | X85740_at_GI_42718008-S      | C-C chemokine receptor-4                    | 3502.494  |
| 6147 | L76528_s_at_NA_illumina      | (clone cc44) senilin 1 (PS1; S182) mRNA     | 3502.5005 |
| 6148 | RC_AA187634_at_GI_4503510-S  | Eukaryotic translation initiation factor 3, | 3502.577  |
| 6149 | RC_AA400513_i_at_NA_illumina | H.sapiens mRNA for GAR22 protein            | 3502.5916 |
| 6150 | Z80777_at_NA_illumina        | H2A/k gene                                  | 3502.652  |
| 6151 | AA151565_at_NA_illumina      | EST: zl39g07.r1 Soares pregnant uterus      | 3502.674  |
| 6152 | X71129_at_GI_4503608-S       | ETFB Electron-transfer-flavoprotein, beta   | 3502.6995 |
| 6153 | L44551_at_NA_illumina        | EST: Homo sapiens thymus mRNA               | 3502.772  |
| 6154 | RC_AA418857_at_GI_21361986-A | EST: zv98g02.s1 Soares NhHMPu S1            | 3502.774  |
| 6155 | AA287289_at_NA_illumina      | EST: zs49g10.r1 NCI_CGAP_GCB1 Homo          | 3502.799  |
| 6156 | X81479_at_GI_40807488-S      | EMR1 Egf-like module containing, mucin-     | 3502.8044 |
| 6157 | AA033659_at_NA_illumina      | EST: zk19c01.r1 Soares pregnant uterus      | 3502.8125 |
| 6158 | RC_AA292128_at_GI_13375808-S | EST: zr58h06.s1 Soares NhHMPu S1            | 3502.8347 |
| 6159 | AA338573_i_at_NA_illumina    | Zinc finger protein 200                     | 3502.841  |
| 6160 | AA393089_at_GI_34916005-S    | EST: zt69b10.r1 Soares testis NHT Homo      | 3502.8804 |
| 6161 | U85992_at_GI_38327519-S      | Clone IMAGE:35527 unknown protein           | 3502.9434 |
| 6162 | U85992_at-2_NA_illumina      | Human clone IMAGE:35527 unknown             | 3502.9434 |
| 6163 | M17236_s_at_NA_illumina      | HLA CLASS II HISTOCOMPATIBILITY             | 3502.9666 |
| 6164 | U90065_s_at_NA_illumina      | Potassium channel KCNO1 mRNA                | 3503.0093 |
| 6165 | M14218_at_GI_31541963-S      | ASL Argininosuccinate lyase                 | 3503.0488 |
| 6166 | M83941_at_GI_32967313-A      | Receptor tyrosine kinase (HEK) mRNA         | 3503.0608 |
| 6167 | AA400361_at_GI_7656945-S     | Homo sapiens embryonic lung protein         | 3503.066  |
| 6168 | H18713_at_GI_21359928-S      | H.sapiens mRNA for aminopeptidase P-        | 3503.1084 |
| 6169 | Y07868_s_at_NA_illumina      | Pirin                                       | 3503.1108 |
| 6170 | RC_D60364_at_NA_illumina     | EST: Human fetal brain cDNA 3'-end GEN-     | 3503.1116 |
| 6171 | L02320_at_GI_16905513-S      | RDX Radixin                                 | 3503.1177 |
| 6172 | X07495_at_GI_24497539-A      | HOMEBOX PROTEIN HOX-C4                      | 3503.1182 |
| 6173 | M20566_at_GI_31317248-A      | IL6R Interleukin 6 receptor                 | 3503.141  |
| 6174 | U50360_s_at_NA_illumina      | Calcium, calmodulin-dependent protein       | 3503.1445 |
| 6175 | AA447439_s_at_NA_illumina    | EST: zw93g09.r1 Soares total fetus          | 3503.1453 |
| 6176 | AA476704_at_GI_27477077-S    | EST: zw87h02.r1 Soares total fetus          | 3503.1667 |
| 6177 | RC_AA398124_s_at_NA_illumina | Growth factor receptor-bound protein 14     | 3503.1934 |
| 6178 | AA149560_at_NA_illumina      | EST: zo29d07.r1 Stratagene colon            | 3503.2014 |
| 6179 | AA121287_at_GI_28559082-A    | EST: zn76e04.r1 Stratagene NT2 neuronal     | 3503.2107 |
| 6180 | R36775_at_NA_illumina        | Small nuclear ribonucleoprotein             | 3503.2415 |



|      |                              |                                            |           |
|------|------------------------------|--------------------------------------------|-----------|
| 6181 | RC_AA025534_at_GI_9910155-S  | EST: ze81b10.s1 Soares fetal heart         | 3503.2507 |
| 6182 | RC_AA342780_at_NA_illumina   | EST: EST48360 Fetal spleen Homo            | 3503.2856 |
| 6183 | AA156920_at_GI_14277673-S    | Ribosomal protein S25                      | 3503.2976 |
| 6184 | U50361_s_at_GI_26667179-A    | Calcium, calmodulin-dependent protein      | 3503.3337 |
| 6185 | AA432227_at_GI_14195604-S    | EST: zw75g09.r1 Soares testis NHT Homo     | 3503.3403 |
| 6186 | RC_AA482035_at_GI_7662287-S  | KIAA0753 gene product                      | 3503.3416 |
| 6187 | D51736_at_GI_41281576-S      | Homo sapiens mRNA for KIAA0871             | 3503.3535 |
| 6188 | RC_AA004811_at_NA_illumina   | EST: zh94a05.s1 Soares fetal liver spleen  | 3503.381  |
| 6189 | W56463_at_NA_illumina        | EST: zc57h06.r1 Soares parathyroid tumor   | 3503.4077 |
| 6190 | RC_AA136332_at_GI_27413907-S | Homo sapiens Luman mRNA, complete          | 3503.4294 |
| 6191 | AA448128_at_GI_5031770-S     | Heat shock 40kD protein 2                  | 3503.47   |
| 6192 | M83772_at_GI_31542790-S      | FMO2 Flavin-containing monooxygenase 2     | 3503.589  |
| 6193 | U11717_s_at_NA_illumina      | SLO Homolog of Drosophila slowpoke         | 3503.608  |
| 6194 | AA243772_at_NA_illumina      | H1 histone family, member X                | 3503.6252 |
| 6195 | U03115_cds10_at_NA_illumina  | Human V beta T-cell receptor (TCRBV)       | 3503.6382 |
| 6196 | U15590_at_GI_5453687-S       | Heat shock protein 27 (HSP27) mRNA         | 3503.639  |
| 6197 | N57112_at_NA_illumina        | EST: yw64a07.r1 Homo sapiens cDNA          | 3503.643  |
| 6198 | M91493_at_NA_illumina        | EST: HUMRTPGEAL Homo sapiens               | 3503.6438 |
| 6199 | M16474_s_at_GI_4557350-S     | Butyrylcholinesterase, mRNA                | 3503.673  |
| 6200 | RC_AA419088_s_at_NA_illumina | Human mRNA for KIAA0309 gene, partial      | 3503.688  |
| 6201 | U26591_at_GI_4826767-A       | ICA1 Islet cell autoantigen 1 (69kD)       | 3503.703  |
| 6202 | X91348_at-2_NA_illumina      | H.sapiens predicted non coding cDNA        | 3503.7117 |
| 6203 | X91348_at_NA_illumina        | Predicted non coding cDNA (DGCR5)          | 3503.7117 |
| 6204 | AA180967_s_at_NA_illumina    | EST: zp41e01.r1 Stratagene muscle          | 3503.7224 |
| 6205 | AA314530_at_GI_5730054-S     | Homo sapiens serum-inducible kinase        | 3503.736  |
| 6206 | RC_AA446188_at_GI_22547230-S | EST: zw66b09.s1 Soares testis NHT          | 3503.757  |
| 6207 | M27878_at_GI_4508036-S       | ZNF84 Zinc finger protein 84 (HPF2)        | 3503.7578 |
| 6208 | RC_AA243478_at_GI_40255093-S | EST: zs15f09.s1 NCI_CGAP_GCB1 Homo         | 3503.7932 |
| 6209 | U59748_at_GI_23346635-S      | Desert hedgehog (hDHH) mRNA, partial       | 3503.8875 |
| 6210 | T70856_at_NA_illumina        | EST: yd15f04.r1 Homo sapiens cDNA          | 3503.906  |
| 6211 | RC_AA450006_s_at_NA_illumina | Sulfotransferase, estrogen-preferring      | 3503.981  |
| 6212 | N76904_at_NA_illumina        | Occludin                                   | 3504.0251 |
| 6213 | RC_D60715_at_NA_illumina     | EST: Human fetal brain cDNA 3'-end GEN-    | 3504.0383 |
| 6214 | RC_AA251420_at_NA_illumina   | EST: zs09g11.s1 NCI_CGAP_GCB1              | 3504.0674 |
| 6215 | L39833_at_GI_27436965-A      | K+ channel beta 1a subunit mRNA,           | 3504.102  |
| 6216 | RC_D19672_at_GI_23238199-A   | EST: Human HL60 3'directed MboI cDNA,      | 3504.132  |
| 6217 | U66198_at_GI_16306542-A      | Fibroblast growth factor homologous factor | 3504.142  |
| 6218 | RC_AA489063_at_GI_41054843-S | EST: aa54f09.s1 NCI_CGAP_GCB1 Homo         | 3504.1719 |
| 6219 | AA005190_at_GI_38683865-S    | Zh95d06.r1 Soares fetal liver spleen       | 3504.2053 |
| 6220 | RC_AA464696_at_NA_illumina   | EST: zx82a10.s1 Soares ovary tumor         | 3504.2136 |
| 6221 | H19597_at_GI_42741681-S      | EST: yn59f04.r1 Homo sapiens cDNA          | 3504.2197 |
| 6222 | H17438_at_GI_19923550-S      | EST: ym40g10.r1 Homo sapiens cDNA          | 3504.245  |
| 6223 | RC_AA146969_at_GI_33519465-S | EST: zl51g10.s1 Soares pregnant uterus     | 3504.2473 |

|      |                               |                                           |           |
|------|-------------------------------|-------------------------------------------|-----------|
| 6224 | AA053052_at_NA_illumina       | EST: zl71a06.r1 Stratagene colon          | 3504.3013 |
| 6225 | V00565_s_at-2_NA_illumina     | Insulin                                   | 3504.3018 |
| 6226 | V00565_s_at_NA_illumina       | INS Insulin                               | 3504.3018 |
| 6227 | RC_AA347393_at_NA_illumina    | EST: EST53685 Fetal heart II Homo         | 3504.3416 |
| 6228 | RC_AA449351_at_NA_illumina    | EST: zx06h05.s1 Soares total fetus        | 3504.3425 |
| 6229 | RC_AA428366_at_GI_8922518-S   | EST: zw51f05.s1 Soares total fetus        | 3504.3616 |
| 6230 | RC_AA453311_at_GI_4505694-S   | EST: zx32d05.s1 Soares total fetus        | 3504.3655 |
| 6231 | RC_AA476922_at_NA_illumina    | EST: zu38c05.s1 Soares ovary tumor        | 3504.3884 |
| 6232 | L76627_at_GI_6006005-S        | Metabotropic glutamate receptor 1 alpha   | 3504.4119 |
| 6233 | AFFX-BioDn-5_st_NA_illumina   | AFFX-BioDn-5_st (endogenous control)      | 3504.4158 |
| 6234 | AFFX-BioDn-5_st-2_NA_illumina | AFFX-BioDn-5_st (miscellaneous control -  | 3504.4158 |
| 6235 | RC_D59277_s_at_NA_illumina    | EST: Human fetal brain cDNA 3'-end GEN-   | 3504.4954 |
| 6236 | Z80776_at_NA_illumina         | H2A/g gene                                | 3504.4988 |
| 6237 | S76978_s_at_NA_illumina       | Prostate-specific membrane antigen        | 3504.5127 |
| 6238 | U24488_s_at_GI_20665033-A     | CYP21 Cytochrome P450, subfamily XXI      | 3504.5354 |
| 6239 | RC_AA033995_at_NA_illumina    | EST: zi05f09.s1 Soares fetal liver spleen | 3504.5388 |
| 6240 | AA437153_at_GI_19923934-S     | EST: zv61b01.r1 Soares testis NHT Homo    | 3504.5464 |
| 6241 | RC_AA427627_at_NA_illumina    | EST: zw30d11.s1 Soares ovary tumor        | 3504.574  |
| 6242 | RC_AA454554_at_NA_illumina    | EST: zx74e07.s1 Soares ovary tumor        | 3504.5754 |
| 6243 | AA428090_at_GI_7657658-S      | EST: zw32a08.r1 Soares ovary tumor        | 3504.598  |
| 6244 | RC_D60205_at_NA_illumina      | EST: Human fetal brain cDNA 3'-end GEN-   | 3504.6082 |
| 6245 | RC_AA291135_at_NA_illumina    | Proliferation-associated 2G4, 38kD        | 3504.6323 |
| 6246 | M62400_at_GI_21614517-S       | GABRR1 Gamma-aminobutyric acid            | 3504.6465 |
| 6247 | RC_AA013172_at_NA_illumina    | EST: ze35g11.s1 Soares retina N2b4HR      | 3504.654  |
| 6248 | U05227_at_GI_5803162-S        | Rar protein mRNA                          | 3504.6548 |
| 6249 | M81349_at_NA_illumina         | SERUM AMYLOID A-4 PROTEIN                 | 3504.703  |
| 6250 | RC_AA055841_at_NA_illumina    | EST: zf20c08.s1 Soares fetal heart        | 3504.737  |
| 6251 | RC_AA504513_at_NA_illumina    | EST: aa60h02.s1 NCI_CGAP_GCB1             | 3504.7979 |
| 6252 | D11139_at_GI_4507508-S        | TIMP1 Tissue inhibitor of                 | 3504.8057 |
| 6253 | W67213_at_NA_illumina         | EST: zd40h08.r1 Soares fetal heart        | 3504.87   |
| 6254 | AFFX-TrpnX-5_at-2_NA_illumina | AFFX-TrpnX-5_at (miscellaneous control -  | 3504.8704 |
| 6255 | AFFX-TrpnX-5_at_NA_illumina   | AFFX-TrpnX-5_at (endogenous control)      | 3504.8704 |
| 6256 | AA059287_s_at_NA_illumina     | EST: zf65e02.r1 Soares retina N2b4HR      | 3504.8987 |
| 6257 | AA095045_r_at_NA_illumina     | EST: cp2563.seq.F Fetal heart, Lambda     | 3504.9158 |
| 6258 | Z22533_s_at_NA_illumina       | Activin A receptor type II-like 1         | 3504.9395 |
| 6259 | HG4052-HT4322_at_NA_illumina  | Glutamate Ionotropic Receptor 1           | 3504.9685 |
| 6260 | AA304829_at_GI_8923223-A      | EST176060 Colon carcinoma (Caco-2) cell   | 3505.0225 |
| 6261 | U88892_at_GI_4504548-S        | Tenascin-C mRNA, splice variant TNCfn-    | 3505.0254 |
| 6262 | U70370_at_GI_24234701-S       | Hindlimb expressed homeobox protein       | 3505.0283 |
| 6263 | U70370_at-2_NA_illumina       | Human hindlimb expressed homeobox         | 3505.0283 |
| 6264 | Z68092_s_at_NA_illumina       | Cell division cycle 25B                   | 3505.0312 |
| 6265 | HG273-HT273_at_NA_illumina    | Lymphocyte Antigen Hla-G3                 | 3505.0657 |
| 6266 | AA027766_at_GI_9558754-S      | EST: HPLA_CCLEE_69a10u HPLA               | 3505.1226 |

|      |                              |                                             |           |
|------|------------------------------|---------------------------------------------|-----------|
| 6267 | U17033_at-2_NA_illumina      | Human 180 kDa transmembrane PLA2            | 3505.1375 |
| 6268 | U17033_at_GI_19923388-S      | 180 kDa transmembrane PLA2 receptor         | 3505.1375 |
| 6269 | RC_AA421149_at_NA_illumina   | EST: zt79f12.s1 Soares testis NHT Homo      | 3505.18   |
| 6270 | RC_AA070184_at_GI_20336291-A | Homo sapiens mRNA for KIAA0890              | 3505.1802 |
| 6271 | U43374_at_NA_illumina        | Normal keratinocyte mRNA                    | 3505.185  |
| 6272 | U43374_at-2_NA_illumina      | Human normal keratinocyte mRNA              | 3505.185  |
| 6273 | RC_AA234975_at_GI_31341922-S | EST: zr50b02.s1 Soares NhHMPu S1            | 3505.2546 |
| 6274 | AA504384_at_NA_illumina      | EST: aa59c02.r1 NCI_CGAP_GCB1 Homo          | 3505.2788 |
| 6275 | Z21217_at_NA_illumina        | KIAA0008 gene product                       | 3505.3057 |
| 6276 | AA099241_at_GI_4885420-S     | EST: zk84c05.r1 Soares pregnant uterus      | 3505.306  |
| 6277 | AA130614_at_NA_illumina      | Zo10f02.r1 Stratagene neuroepithelium       | 3505.366  |
| 6278 | AA249119_at_GI_20070271-S    | Ec0276.seq.F Human fetal heart, Lambda      | 3505.3696 |
| 6279 | HG2507-HT2603_at_NA_illumina | Potassium Channel, Voltage-Gated Kcnc1      | 3505.3953 |
| 6280 | HG870-HT870_at_NA_illumina   | Golgin, 165 Kda Polypeptide                 | 3505.4302 |
| 6281 | U66581_at_GI_4885308-S       | Putative G protein-coupled receptor         | 3505.4312 |
| 6282 | D32002_s_at_GI_40254465-S    | NCBP Nuclear cap binding protein, 80kD      | 3505.4395 |
| 6283 | D32002_s_at-2_NA_illumina    | Nuclear cap binding protein, 80kD           | 3505.4395 |
| 6284 | X78932_at_GI_40538737-S      | ZNF9 Zinc finger protein 9 (a cellular      | 3505.4453 |
| 6285 | D55638_at_NA_illumina        | B-cell PABL (pseudoautosomal boundary-      | 3505.4568 |
| 6286 | X96754_at_NA_illumina        | GLUL Glutamate-ammonia ligase               | 3505.5012 |
| 6287 | RC_AA432186_at_GI_21717831-S | EST: zw71g10.s1 Soares testis NHT           | 3505.5305 |
| 6288 | L17075_s_at_GI_4557242-S     | SERINE/THREONINE-PROTEIN KINASE             | 3505.5593 |
| 6289 | D14660_at_GI_21735600-S      | PUTATIVE 60S RIBOSOMAL PROTEIN              | 3505.5671 |
| 6290 | AA156882_at_NA_illumina      | EST: zl18h07.r1 Soares pregnant uterus      | 3505.6218 |
| 6291 | D38128_at_GI_39995095-S      | PTGIR Prostaglandin I2 (prostacyclin)       | 3505.7192 |
| 6292 | U13680_at_GI_9257227-A       | LDHC Lactate dehydrogenase C                | 3505.7705 |
| 6293 | U13680_at-2_NA_illumina      | Lactate dehydrogenase C                     | 3505.7705 |
| 6294 | X51755_cds5_s_at_NA_illumina | Ig light-chain, partial Ke-Oz- polypeptide; | 3505.78   |
| 6295 | U20860_at_GI_23238239-S      | Angiotensin II type 2 receptor mRNA         | 3505.7883 |
| 6296 | RC_AA358147_at_GI_9966902-S  | EST: EST66987 Fetal lung III Homo           | 3505.7898 |
| 6297 | U10693_at_GI_29029628-S      | MAGE-8 antigen (MAGE8) gene                 | 3505.8457 |
| 6298 | D38449_at_GI_6005771-S       | G protein-coupled receptor                  | 3505.8513 |
| 6299 | U52155_at_GI_25121965-S      | Inward rectifier potassium channel Kir1.2   | 3505.8726 |
| 6300 | J04742_at_NA_illumina        | Autonomous replicating sequence H1          | 3505.9111 |
| 6301 | HG2190-HT2260_at_NA_illumina | Crystallin, Beta B3 (Gb:X15144)             | 3505.9417 |
| 6302 | Y10812_at_GI_22907027-S      | Fructose-1,6-bisphosphatase                 | 3505.9443 |
| 6303 | RC_AA236986_at_GI_16936525-S | EST: zs43e07.s1 Soares NhHMPu S1            | 3505.9858 |
| 6304 | S78723_rna2_at_GI_10835174-S | 5-HT2AR=serotonin 5-HT2A receptor           | 3506.0193 |
| 6305 | M19878_s_at_NA_illumina      | Calbindin 27 gene, exons 1 and 2, and Alu   | 3506.0344 |
| 6306 | U08198_rna1_at_GI_4557392-S  | Complement C8 gamma subunit precursor       | 3506.0652 |
| 6307 | D38163_s_at-2_NA_illumina    | Collagen, type XIX, alpha 1                 | 3506.0725 |
| 6308 | D38163_s_at_GI_18780268-S    | COL19A1 Collagen, type XIX, alpha 1         | 3506.0725 |
| 6309 | RC_AA160329_at_GI_27734902-S | EST: zo56d04.s1 Stratagene pancreas         | 3506.089  |

|      |                              |                                            |           |
|------|------------------------------|--------------------------------------------|-----------|
| 6310 | AA112595_at_GI_24475812-S    | Zm28f12.r1 Stratagene pancreas             | 3506.1167 |
| 6311 | RC_D60026_at_NA_illumina     | EST: Human fetal brain cDNA 3'-end GEN-    | 3506.1492 |
| 6312 | AA090695_at_GI_8923931-S     | EST: y1365.seq.F Fetal heart, Lambda       | 3506.214  |
| 6313 | RC_AA040158_at_NA_illumina   | EST: zk47b05.s1 Soares pregnant uterus     | 3506.2295 |
| 6314 | D84290_s_at_NA_illumina      | GPI anchored molecule like protein         | 3506.2676 |
| 6315 | L24564_at_GI_4759053-S       | Rad mRNA                                   | 3506.3235 |
| 6316 | U05255_at_NA_illumina        | GLYCOPHORIN B PRECURSOR                    | 3506.3416 |
| 6317 | HG3117-HT3293_at_NA_illumina | Mps1 (Gb:L20314)                           | 3506.3564 |
| 6318 | X98225_at_NA_illumina        | Rattus norvegicus mRNA for gastrin-        | 3506.3806 |
| 6319 | RC_AA457138_at_GI_13994189-S | EST: zx84f02.s1 Soares ovary tumor         | 3506.4724 |
| 6320 | N94824_at_GI_20336295-S      | Homo sapiens Chromosome 16 BAC clone       | 3506.4773 |
| 6321 | T80685_at_NA_illumina        | EST: yd23a06.r1 Homo sapiens cDNA          | 3506.4844 |
| 6322 | X76498_at_GI_4502454-S       | Uterine bombesin receptor                  | 3506.4846 |
| 6323 | U90544_at_GI_5031954-S       | Sodium phosphate transporter (NPT3)        | 3506.4902 |
| 6324 | W26635_at_NA_illumina        | Core-binding factor, runt domain, alpha    | 3506.5413 |
| 6325 | W36288_at_NA_illumina        | EST: HFBEST-65 Human fetal brain           | 3506.5466 |
| 6326 | AA400044_at_NA_illumina      | Human clone 23803 mRNA, partial cds        | 3506.5723 |
| 6327 | AA418143_at_NA_illumina      | EST: zv97b09.r1 Soares NhHMPu S1           | 3506.618  |
| 6328 | U60808_s_at_GI_22035623-S    | CDP-diacylglycerol synthase (CDS) mRNA     | 3506.6348 |
| 6329 | M94547_at_GI_10864036-S      | HUMMLC2At; Homo sapiens; ; 593 base-       | 3506.6372 |
| 6330 | RC_AA609008_at_GI_13376252-S | EST: af05f06.s1 Soares testis NHT Homo     | 3506.6443 |
| 6331 | F08226_at_GI_7019570-S       | H. sapiens partial cDNA sequence; clone c- | 3506.6453 |
| 6332 | U13696_s_at_NA_illumina      | DNA mismatch repair gene homologue         | 3506.6821 |
| 6333 | M86873_s_at_NA_illumina      | Type A plasminogen related gene, exon 3    | 3506.7104 |
| 6334 | Z84722_at_NA_illumina        | -14 gene, containing globin regulatory     | 3506.7397 |
| 6335 | U16120_s_at_GI_4507044-S     | SLC6A6 Solute carrier family 6             | 3506.759  |
| 6336 | H09246_at_GI_31317208-A      | EST: yl98b09.r1 Homo sapiens cDNA          | 3506.7737 |
| 6337 | RC_AA194881_at_NA_illumina   | TAL1 (SCL) interrupting locus              | 3506.7854 |
| 6338 | RC_AA233371_at_NA_illumina   | EST: zr48f03.s1 Soares NhHMPu S1           | 3506.7979 |
| 6339 | U62435_at_GI_21361147-S      | Cholinergic receptor, neuronal nicotinic,  | 3506.8394 |
| 6340 | AA453369_at_GI_31657120-S    | EST: zx47c07.r1 Soares testis NHT Homo     | 3506.8408 |
| 6341 | U93553_at-2_NA_illumina      | Fetoprotein-alpha 1 (AFP) transcription    | 3506.846  |
| 6342 | U93553_at_GI_45505141-A      | Alpha1-fetoprotein transcription factor    | 3506.846  |
| 6343 | D29833_at_NA_illumina        | Salivary proline rich peptide P-B          | 3506.8704 |
| 6344 | U13061_rna1_at_GI_29540544-S | Dehydroepiandrosterone sulfotransferase    | 3506.9067 |
| 6345 | RC_AA211370_at_GI_19923906-S | EST: zq88a01.s1 Stratagene hNT neuron      | 3506.9077 |
| 6346 | RC_D60670_at_NA_illumina     | EST: Human fetal brain cDNA 3'-end GEN-    | 3506.946  |
| 6347 | U73499_at_NA_illumina        | Hepatic nuclear factor 1-alpha (TCF-1-     | 3507.026  |
| 6348 | AA478834_at_NA_illumina      | Homo sapiens mRNA for KIAA0582             | 3507.0413 |
| 6349 | W28763_at_NA_illumina        | Homo sapiens KIAA0431 mRNA, partial        | 3507.0525 |
| 6350 | RC_AA251984_at_GI_37540735-S | EST: zr63a08.s1 Soares NhHMPu S1           | 3507.0557 |
| 6351 | U35340_at_GI_21536279-S      | CRYBB1 Crystallin beta-B1                  | 3507.0886 |
| 6352 | RC_AA057193_at_NA_illumina   | EST: zk79g01.s1 Soares pregnant uterus     | 3507.239  |

|      |                                |                                              |           |
|------|--------------------------------|----------------------------------------------|-----------|
| 6353 | HG4417-HT4687_f_at_NA_illumina | Homeotic Protein Hpx-2                       | 3507.2747 |
| 6354 | RC_AA346407_at_NA_illumina     | EST: EST52587 Fetal heart II Homo            | 3507.2856 |
| 6355 | AA249260_at_GI_42658488-S      | EST: hfe0566.seq.F Human fetal heart,        | 3507.286  |
| 6356 | D90224_at_GI_23510446-S        | TXGP1 Tax-transcriptionally activated        | 3507.2876 |
| 6357 | RC_AA253440_s_at_NA_illumina   | EST: zr76h03.s1 Soares NhHMPu S1             | 3507.2942 |
| 6358 | RC_AA043219_at_NA_illumina     | EST: zk55g09.s1 Soares pregnant uterus       | 3507.3154 |
| 6359 | Z21967_at_NA_illumina          | POU domain, class 6, transcription factor 1  | 3507.3162 |
| 6360 | RC_AA411400_at_GI_31543086-S   | EST: zv28f01.s1 Soares ovary tumor           | 3507.3728 |
| 6361 | RC_AA256153_i_at_NA_illumina   | EST: zr79a09.s1 Soares NhHMPu S1             | 3507.384  |
| 6362 | D87942_at_NA_illumina          | Fucosyltransferase 2 (secretor status        | 3507.392  |
| 6363 | RC_AA464946_at_GI_24586660-S   | EST: aa93h11.s1 Stratagene fetal retina      | 3507.4155 |
| 6364 | M64936_i_at_NA_illumina        | Homo sapiens retinoic acid-inducible         | 3507.528  |
| 6365 | D58343_at_NA_illumina          | EST: Human aorta cDNA 5'-end GEN-            | 3507.627  |
| 6366 | M14648_at_GI_40217844-S        | ITGAV Integrin, alpha V (vitronectin         | 3507.63   |
| 6367 | RC_AA253055_at_NA_illumina     | EST: zr52d03.s1 Soares NhHMPu S1             | 3507.675  |
| 6368 | R56716_at_NA_illumina          | EST: yg95b01.r1 Homo sapiens cDNA            | 3507.6917 |
| 6369 | S42457_at_GI_4502914-S         | CGMP-GATED CATION CHANNEL                    | 3507.7563 |
| 6370 | RC_AA496963_at_GI_40804741-S   | EST: aa42f10.s1 Soares NhHMPu S1             | 3507.8499 |
| 6371 | AC002464_at_GI_31542326-S      | BAC clone RG331P03, complete                 | 3507.8647 |
| 6372 | W27721_at_GI_7662107-S         | Homo sapiens KIAA0424 mRNA, partial          | 3507.8872 |
| 6373 | X52150_rna1_s_at_NA_illumina   | Arylsulfatase A                              | 3507.9072 |
| 6374 | U79751_at_GI_37622354-S        | Basic-leucine zipper nuclear factor (JEM-    | 3507.9138 |
| 6375 | R08720_at_NA_illumina          | Yf24f01.r1 Homo sapiens cDNA clone           | 3507.9165 |
| 6376 | HG2157-HT2227_at_NA_illumina   | Mucin 4, Tracheobronchial                    | 3507.9316 |
| 6377 | U78798_at-2_NA_illumina        | TNF receptor-associated factor 6             | 3507.964  |
| 6378 | U78798_at_GI_22027628-A        | TNF receptor associated factor 6 (TRAF6)     | 3507.964  |
| 6379 | AA292153_at_NA_illumina        | Growth arrest-specific 1                     | 3507.9705 |
| 6380 | RC_AA430167_at_GI_10864022-S   | EST: zw59h02.s1 Soares total fetus           | 3507.9775 |
| 6381 | X59372_at_GI_23397673-S        | HOX4C mRNA for a homeobox protein            | 3508.066  |
| 6382 | N44265_at_NA_illumina          | Yy33c04.r1 Homo sapiens cDNA clone           | 3508.0923 |
| 6383 | X81851_s_at_NA_illumina        | IL-4 gene splice variant                     | 3508.0947 |
| 6384 | AA043160_at_GI_21314751-S      | EST: zk48g01.r1 Soares pregnant uterus       | 3508.0967 |
| 6385 | HG907-HT907_at_NA_illumina     | Mg44                                         | 3508.0994 |
| 6386 | AA122302_at_NA_illumina        | EST: zk97d12.r1 Soares pregnant uterus       | 3508.1057 |
| 6387 | M65290_at_GI_24497437-S        | IL12B Natural killer cell stimulatory factor | 3508.1477 |
| 6388 | L13329_at_GI_5360207-A         | IDS Iduronate 2-sulfatase (Hunter            | 3508.2107 |
| 6389 | RC_AA233899_at_GI_31742485-S   | EST: zr49c02.s1 Soares NhHMPu S1             | 3508.2185 |
| 6390 | U66359_at_NA_illumina          | T54 protein (T54) mRNA                       | 3508.2422 |
| 6391 | R61426_at_NA_illumina          | EST: yh15f04.r1 Homo sapiens cDNA            | 3508.2444 |
| 6392 | D14678_at_GI_37552135-S        | Kinesin-related protein, partial cds         | 3508.272  |
| 6393 | X81420_at_GI_15431319-S        | MLN137 mRNA                                  | 3508.311  |
| 6394 | W28414_at_NA_illumina          | EST: 46g7 Human retina cDNA randomly         | 3508.3457 |
| 6395 | AA431066_at_GI_38788480-S      | Homo sapiens gene for Proline synthetase     | 3508.396  |

|      |                                |                                           |           |
|------|--------------------------------|-------------------------------------------|-----------|
| 6396 | AA203300_at_NA_illumina        | Homo sapiens partial mRNA for beta-       | 3508.4043 |
| 6397 | X99268_at_GI_17978464-S        | B-HLH DNA binding protein                 | 3508.409  |
| 6398 | W27650_at_NA_illumina          | EST: 36e12 Human retina cDNA randomly     | 3508.427  |
| 6399 | AA018847_at_GI_42734431-S      | EST: ze57h12.r1 Soares retina N2b4HR      | 3508.4988 |
| 6400 | C00219_at_GI_40548379-S        | EST: HUMGS0005882, Human Gene             | 3508.5522 |
| 6401 | N42022_at_GI_18375606-A        | EST: yw69g06.r1 Homo sapiens cDNA         | 3508.5693 |
| 6402 | U51899_rna1_s_at_NA_illumina   | Casein, kappa                             | 3508.5725 |
| 6403 | D42045_at_GI_42734318-S        | KIAA0086 gene                             | 3508.659  |
| 6404 | D83781_at_GI_37541634-S        | KIAA0197 gene, partial cds                | 3508.6707 |
| 6405 | HG3369-HT3546_at_NA_illumina   | Potassium Channel, Voltage-Gated, Isk-    | 3508.6956 |
| 6406 | R93776_s_at_GI_16418464-S      | EST: yq35e06.r1 Homo sapiens cDNA         | 3508.7075 |
| 6407 | R82528_at_NA_illumina          | EST: yj19a05.r1 Homo sapiens cDNA         | 3508.7515 |
| 6408 | U89012_at_GI_4758171-S         | Dentin matrix acidic phosphoprotein 1     | 3508.7935 |
| 6409 | RC_AA477541_at_NA_illumina     | EST: zu41a09.s1 Soares ovary tumor        | 3508.802  |
| 6410 | RC_AA411351_at_NA_illumina     | EST: zv28c04.s1 Soares ovary tumor        | 3508.8125 |
| 6411 | U35376_at_GI_4508038-S         | Repressor transcriptional factor (ZNF85)  | 3508.9236 |
| 6412 | RC_AA406197_at_GI_42660245-S   | EST: zv24d11.s1 Soares NhHMPu S1          | 3508.9255 |
| 6413 | RC_AA234712_at_GI_38201637-A   | Homo sapiens mRNA for KIAA0630            | 3508.9297 |
| 6414 | AA334393_at_GI_28372530-S      | EST: EST38601 Embryo, 9 week Homo         | 3508.9348 |
| 6415 | U35407_at_GI_37059745-S        | Peroxisomal targeting signal import       | 3508.9485 |
| 6416 | RC_AA001908_at_GI_13376676-S   | EST: zh83a05.s1 Soares fetal liver spleen | 3508.9673 |
| 6417 | N25467_at_GI_5901937-S         | Homo sapiens mRNA for DEPP (decidual      | 3508.9714 |
| 6418 | U83668_rna1_at_GI_29788765-S   | Human beta-tubulin (TUB4q) gene,          | 3508.9963 |
| 6419 | RC_AA256700_at_NA_illumina     | Interferon (alpha, beta and omega)        | 3509.02   |
| 6420 | RC_AA214516_at_NA_illumina     | EST: zr94f12.s1 NCI_CGAP_GCB1 Homo        | 3509.0713 |
| 6421 | X81895_at_NA_illumina          | GENX-5624 mRNA, 3' UTR                    | 3509.0986 |
| 6422 | X00949_at_GI_20143931-S        | Prepro-relaxin H1                         | 3509.1223 |
| 6423 | X05615_at_GI_33589851-S        | Thyroglobulin                             | 3509.133  |
| 6424 | RC_AA102098_at_GI_21361978-S   | EST: zl79f12.s1 Stratagene colon          | 3509.134  |
| 6425 | RC_AA033874_at_NA_illumina     | EST: zk20h04.s1 Soares pregnant uterus    | 3509.1602 |
| 6426 | AA085354_at_NA_illumina        | Zn01g03.r1 Stratagene colon HT29          | 3509.2832 |
| 6427 | AA196024_at_GI_42741668-S      | Homo sapiens sarcosin mRNA, complete      | 3509.323  |
| 6428 | W26322_at_GI_22095350-S        | Homo sapiens mRNA for KIAA0745            | 3509.3833 |
| 6429 | W28069_at_GI_14719421-S        | 44f3 Human retina cDNA randomly primed    | 3509.482  |
| 6430 | AA036794_at_NA_illumina        | EST: zk29a01.r1 Soares pregnant uterus    | 3509.5117 |
| 6431 | U06711_s_at_NA_illumina        | Mucin 5, subtype B, tracheobronchial      | 3509.514  |
| 6432 | U57093_at-2_NA_illumina        | RAB27B, member RAS oncogene family        | 3509.516  |
| 6433 | U57093_at_GI_21314628-S        | Small GTP-binding protein rab27b mRNA     | 3509.516  |
| 6434 | W26355_at_NA_illumina          | EST: 26d2 Human retina cDNA randomly      | 3509.5205 |
| 6435 | W26566_at_GI_13375900-S        | EST: 33b10 Human retina cDNA randomly     | 3509.538  |
| 6436 | AA418320_at_NA_illumina        | Homo sapiens mRNA for pre-mRNA            | 3509.554  |
| 6437 | M55682_s_at_GI_13518035-S      | CRTM Cartilage matrix protein             | 3509.5667 |
| 6438 | HG3703-HT3915_s_at_NA_illumina | Udp-Glucuronosyltransferase 1 Family,     | 3509.5671 |

|      |                                |                                           |           |
|------|--------------------------------|-------------------------------------------|-----------|
| 6439 | U43701_at_GI_17105393-S        | Ribosomal protein L23a                    | 3509.6125 |
| 6440 | U27699_at_GI_19923156-S        | SODIUM- AND CHLORIDE-DEPENDENT            | 3509.6714 |
| 6441 | HG2530-HT2626_at_NA_illumina   | Adenylyl Cyclase-Associated Protein 2     | 3509.6772 |
| 6442 | X66357_s_at_GI_4557438-S       | Cyclin-dependent kinase 3                 | 3509.679  |
| 6443 | RC_AA477132_at_NA_illumina     | EST: zu37f03.s1 Soares ovary tumor        | 3509.6885 |
| 6444 | W07723_at_NA_illumina          | EST: zb03b03.r1 Soares fetal lung         | 3509.7341 |
| 6445 | RC_AA157013_at_NA_illumina     | EST: zl21b03.s1 Soares pregnant uterus    | 3509.7385 |
| 6446 | L35546_at-2_NA_illumina        | Glutamate-cysteine ligase (gamma-         | 3509.7903 |
| 6447 | L35546_at_GI_4504010-S         | GLCLR Glutamate-cysteine ligase (gamma-   | 3509.7903 |
| 6448 | Z33905_at_GI_38045927-A        | 43kD acetylcholine receptor-associated    | 3509.8228 |
| 6449 | HG2841-HT2970_at_NA_illumina   | Albumin, Alt. Splice 5                    | 3509.8672 |
| 6450 | R63981_at_NA_illumina          | EST: yi19a02.r1 Homo sapiens cDNA         | 3509.869  |
| 6451 | RC_AA456302_at_NA_illumina     | EST: aa13f07.s1 Soares NhHMPu S1          | 3509.8843 |
| 6452 | AA206625_at_GI_4758565-S       | EST: zq56d06.r1 Stratagene                | 3509.9673 |
| 6453 | AA490758_at_NA_illumina        | No info for gene                          | 3510.006  |
| 6454 | U69961_at_GI_24234710-A        | RIEG Rieger syndrome (solarshin)          | 3510.009  |
| 6455 | U69961_at-2_NA_illumina        | Paired-like homeodomain transcription     | 3510.009  |
| 6456 | W92283_at_NA_illumina          | EST: ze44e02.r1 Soares retina N2b4HR      | 3510.0217 |
| 6457 | AA383703_i_at_NA_illumina      | EST97119 Testis I Homo sapiens cDNA 5'    | 3510.0308 |
| 6458 | RC_AA410337_at_GI_5901887-S    | EST: zv16e01.s1 Soares NhHMPu S1          | 3510.067  |
| 6459 | RC_AA436553_at_NA_illumina     | EST: zv08c11.s1 Soares NhHMPu S1          | 3510.0806 |
| 6460 | D83913_at_GI_4503976-S         | Genethonin 1                              | 3510.119  |
| 6461 | RC_AA401754_at_NA_illumina     | EST: zt53d10.s1 Soares ovary tumor        | 3510.1494 |
| 6462 | L24470_at-2_NA_illumina        | Prostaglandin F receptor (FP)             | 3510.185  |
| 6463 | L24470_at_GI_39995094-S        | PROSTAGLANDIN F2-ALPHA                    | 3510.185  |
| 6464 | M30625_s_at_GI_17986269-A      | Dopamine D2 receptor, mRNA                | 3510.3005 |
| 6465 | RC_AA126472_at_GI_34222125-S   | EST: zn85a12.s1 Stratagene lung           | 3510.3386 |
| 6466 | D50550_at_GI_22547226-S        | LLGL mRNA                                 | 3510.341  |
| 6467 | Z26634_at_GI_10947053-A        | ANK2 Ankyrin 2 (neuronal)                 | 3510.346  |
| 6468 | S69370_s_at_NA_illumina        | PAX3B=transcription factor {alternatively | 3510.39   |
| 6469 | D21239_at_GI_38373674-A        | C3G protein                               | 3510.427  |
| 6470 | AA074407_at_NA_illumina        | EST: zm15c08.r1 Stratagene pancreas       | 3510.4294 |
| 6471 | N72635_at_NA_illumina          | EST: yv73g12.r1 Soares fetal liver spleen | 3510.4343 |
| 6472 | M24748_cds2_s_at_GI_40806158-I | THRA1 gene (thyroid receptor alpha-1)     | 3510.4436 |
| 6473 | AA491376_at_NA_illumina        | EST: aa65e11.r1 NCI_CGAP_GCB1             | 3510.453  |
| 6474 | RC_AA421053_at_NA_illumina     | EST: zu09g12.s1 Soares testis NHT Homo    | 3510.4685 |
| 6475 | RC_AA243723_at_NA_illumina     | EST: zr68g10.s1 Soares NhHMPu S1          | 3510.4714 |
| 6476 | AA397616_at_NA_illumina        | EST: zt79c08.r1 Soares testis NHT Homo    | 3510.4753 |
| 6477 | U43944_at_NA_illumina          | MALATE OXIDOREDUCTASE                     | 3510.4946 |
| 6478 | AA486144_at_NA_illumina        | EST: ab14c10.r1 Stratagene lung           | 3510.5723 |
| 6479 | RC_AA045084_at_GI_13375829-S   | EST: zk66h05.s1 Soares pregnant uterus    | 3510.5774 |
| 6480 | Y08564_at_GI_34452724-S        | GalNAc-T4 gene                            | 3510.5852 |
| 6481 | L34673_at_GI_21071053-A        | ATPase, DNA-binding protein (HIP116)      | 3510.5874 |

|      |                              |                                            |           |
|------|------------------------------|--------------------------------------------|-----------|
| 6482 | U90910_at_GI_22749134-S      | Clone 23564 mRNA sequence                  | 3510.6025 |
| 6483 | U90910_at-2_NA_illumina      | Human clone 23564 mRNA sequence            | 3510.6025 |
| 6484 | M31606_at_GI_4505784-S       | PHKG2 Phosphorylase kinase, gamma 2        | 3510.6187 |
| 6485 | D50931_at_GI_41281484-S      | KIAA0141 gene                              | 3510.6199 |
| 6486 | RC_AA290783_s_at_NA_illumina | Growth hormone receptor                    | 3510.6243 |
| 6487 | RC_AA495926_at_NA_illumina   | EST: zw05h01.s1 Soares NhHMPu S1           | 3510.6553 |
| 6488 | RC_AA186427_s_at_NA_illumina | Human hTRIP (hTRIP) mRNA, complete         | 3510.672  |
| 6489 | M76125_s_at_GI_21536467-A    | AXL AXL receptor tyrosine kinase           | 3510.6936 |
| 6490 | M95585_s_at_GI_31542934-S    | HLF Hepatic leukemia factor                | 3510.7078 |
| 6491 | RC_AA280670_at_NA_illumina   | EST: zs97a07.s1 NCI_CGAP_GCB1              | 3510.7173 |
| 6492 | U37673_at_GI_37655178-S      | Neuron-specific vesicle coat protein and   | 3510.728  |
| 6493 | H05405_at_GI_18079324-S      | EST: yl80d11.r1 Homo sapiens cDNA          | 3510.728  |
| 6494 | RC_AA504631_at_GI_7706104-S  | EST: aa63d02.s1 NCI_CGAP_GCB1              | 3510.7422 |
| 6495 | X95289_at_GI_30240938-S      | HCGIX protein                              | 3510.7585 |
| 6496 | AA070090_at_GI_34147485-S    | EST: zm67b11.r1 Stratagene                 | 3510.7627 |
| 6497 | AA447811_at_NA_illumina      | Regulator of G-protein signalling 16       | 3510.8008 |
| 6498 | D16227_at_GI_19913440-A      | HPCAL1 Hippocalcin-like 1                  | 3510.8074 |
| 6499 | RC_AA436186_at_NA_illumina   | EST: zv22e07.s1 Soares NhHMPu S1           | 3510.829  |
| 6500 | K03008_cds1_at_GI_13377000-S | Gamma-G2-psi gene extracted from           | 3510.8457 |
| 6501 | U12978_at_GI_27502372-A      | Guanylate cyclase mRNA, complete           | 3510.8967 |
| 6502 | W26054_at_NA_illumina        | EST: 18d8 Human retina cDNA randomly       | 3510.9167 |
| 6503 | U39487_at_GI_9257259-S       | XDH Xanthine dehydrogenase                 | 3510.9214 |
| 6504 | AA324364_at_GI_21704270-A    | EST: EST27175 Cerebellum II Homo           | 3510.9265 |
| 6505 | W23474_at_NA_illumina        | EST: zb33d08.r1 Soares parathyroid tumor   | 3510.9275 |
| 6506 | RC_AA278648_at_NA_illumina   | EST: zs79a06.s1 NCI_CGAP_GCB1              | 3510.9277 |
| 6507 | X05855_at_NA_illumina        | EEF1G Translation elongation factor 1      | 3510.9373 |
| 6508 | RC_AA620889_at_NA_illumina   | EST: af95g10.s1 Soares testis NHT Homo     | 3510.9446 |
| 6509 | D85425_s_at_GI_11496977-S    | Transactivator HSM-1                       | 3510.945  |
| 6510 | YEL002c/WBP1_at_NA_illumina  | No info for gene                           | 3510.9626 |
| 6511 | RC_AA167696_at_GI_21071040-S | EST: zq38c06.s1 Stratagene hNT neuron      | 3511.001  |
| 6512 | X72304_s_at_NA_illumina      | Corticotropin releasing hormone receptor 1 | 3511.0234 |
| 6513 | L13286_at_GI_13904862-S      | Mitochondrial 1,25-dihydroxyvitamin D3 24- | 3511.0251 |
| 6514 | S82472_at_NA_illumina        | Beta -pol=DNA polymerase beta {exon        | 3511.0364 |
| 6515 | RC_AA224162_at_NA_illumina   | EST: zr15d05.s1 Stratagene NT2 neuronal    | 3511.0422 |
| 6516 | RC_AA010628_at_GI_13994235-S | EST: zi09h11.s1 Soares fetal liver spleen  | 3511.0784 |
| 6517 | RC_AA403041_at_NA_illumina   | Cellular retinoic acid-binding protein 1   | 3511.0989 |
| 6518 | RC_D59856_at_NA_illumina     | EST: Human fetal brain cDNA 3'-end GEN-    | 3511.159  |
| 6519 | D12763_at_GI_27894323-A      | ST2 Suppression of tumorigenicity 2        | 3511.1604 |
| 6520 | N99507_at_NA_illumina        | EST: za39c03.r1 Homo sapiens cDNA          | 3511.1675 |
| 6521 | T61997_at_NA_illumina        | EST: yb97a01.r1 Homo sapiens cDNA          | 3511.2236 |
| 6522 | HG944-HT944_s_at_NA_illumina | Dopamine Receptor D4                       | 3511.2712 |
| 6523 | L11573_at_NA_illumina        | Surfactant protein B mRNA                  | 3511.3113 |
| 6524 | RC_AA152372_at_NA_illumina   | EST: zo07c04.s1 Stratagene endothelial     | 3511.3145 |



|      |                                |                                              |           |
|------|--------------------------------|----------------------------------------------|-----------|
| 6525 | RC_AA406599_at_NA_illumina     | EST: zv15a07.s1 Soares NhHMPu S1             | 3511.3464 |
| 6526 | U43672_at_GI_27477086-S        | Putative transmembrane receptor IL-1Rrp      | 3511.427  |
| 6527 | AA321700_at_GI_8922232-S       | EST: EST24228 CAMA1Ee cell line II           | 3511.4482 |
| 6528 | RC_AA226879_at_NA_illumina     | EST: zr19c09.s1 Stratagene NT2 neuronal      | 3511.5256 |
| 6529 | M60626_at_GI_36951095-S        | FPR1 Formyl peptide receptor 1               | 3511.5386 |
| 6530 | L22647_s_at_GI_38505193-S      | Prostaglandin E receptor 1 (subtype EP1),    | 3511.606  |
| 6531 | AFFX-PheX-3_at-2_NA_illumina   | AFFX-PheX-3_at (miscellaneous control -      | 3511.7058 |
| 6532 | AFFX-PheX-3_at_NA_illumina     | AFFX-PheX-3_at (endogenous control)          | 3511.7058 |
| 6533 | RC_AA281295_at_NA_illumina     | EST: zt08g01.s1 NCI_CGAP_GCB1 Homo           | 3511.718  |
| 6534 | U38372_at_NA_illumina          | Huntingtin associated protein (hHAP1)        | 3511.7615 |
| 6535 | M11437_cds1_at_NA_illumina     | KNG gene (kininogen) extracted from          | 3511.7622 |
| 6536 | AA093489_at_NA_illumina        | Homo sapiens transcriptional regulatory      | 3511.7783 |
| 6537 | RC_AA243870_at_GI_21361512-S   | EST: zr65d04.s1 Soares NhHMPu S1             | 3511.7961 |
| 6538 | T40385_at_NA_illumina          | H2A histone family, member Z                 | 3511.8086 |
| 6539 | H87652_at_GI_4502408-S         | Bicaudal D (Drosophila) homolog 1            | 3511.8176 |
| 6540 | D38500_at_NA_illumina          | PMS8 mRNA (yeast mismatch repair gene        | 3511.8188 |
| 6541 | S81661_s_at_NA_illumina        | FGF7 Fibroblast growth factor 7              | 3511.8528 |
| 6542 | L40396_at_NA_illumina          | (clone s22i71) mRNA fragment                 | 3511.8628 |
| 6543 | U55853_at-2_NA_illumina        | Homo sapiens 130 kD Golgi-localized          | 3511.9182 |
| 6544 | U55853_at_GI_29826326-S        | 130 kD Golgi-localized phosphoprotein        | 3511.9182 |
| 6545 | M18185_at_GI_4758435-S         | GIP Gastric inhibitory polypeptide           | 3511.927  |
| 6546 | U18383_s_at_NA_illumina        | Nuclear respiratory factor 1 (NRF-1) gene    | 3511.932  |
| 6547 | H47945_at_NA_illumina          | Lysozyme (renal amyloidosis)                 | 3511.9734 |
| 6548 | W27993_at_NA_illumina          | EST: 43e1 Human retina cDNA randomly         | 3511.9783 |
| 6549 | N42137_at_NA_illumina          | EST: yy06a09.r1 Homo sapiens cDNA            | 3511.9883 |
| 6550 | HG2797-HT2905_s_at_NA_illumina | Clathrin, Light Polypeptide B, Alt. Splice 1 | 3512.0002 |
| 6551 | AA281862_at_NA_illumina        | EST: zt07b01.r1 NCI_CGAP_GCB1 Homo           | 3512.0154 |
| 6552 | X72882_at_NA_illumina          | 14A6CK DNA sequence                          | 3512.0256 |
| 6553 | U14577_s_at_GI_45580726-S      | MAP1A Microtubule-associated protein 1A      | 3512.0378 |
| 6554 | Z83804_at_NA_illumina          | Axonemal dynein heavy chain (partial, ID     | 3512.0415 |
| 6555 | RC_AA113387_at_NA_illumina     | EST: zn70g06.s1 Stratagene HeLa cell s3      | 3512.0564 |
| 6556 | RC_AA055534_at_GI_37549687-S   | EST: zf21d03.s1 Soares fetal heart           | 3512.0598 |
| 6557 | X12556_s_at_NA_illumina        | MCF.2 cell line derived transforming         | 3512.068  |
| 6558 | X80695_at_GI_4826879-S         | RPL27 Ribosomal protein L27                  | 3512.1167 |
| 6559 | M86868_at-2_NA_illumina        | Gamma-aminobutyric acid (GABA)               | 3512.122  |
| 6560 | M86868_at_GI_4503870-S         | GABRR2 Gamma-aminobutyric acid               | 3512.122  |
| 6561 | D80914_at_GI_33519462-S        | EST: Human fetal brain cDNA 5'-end GEN-      | 3512.1255 |
| 6562 | J00287_at_NA_illumina          | PEPSINOGEN A PRECURSOR                       | 3512.1392 |
| 6563 | RC_AA035744_at_NA_illumina     | EST: ze75f12.s1 Soares fetal heart           | 3512.1404 |
| 6564 | U40317_s_at_NA_illumina        | Protein tyrosine phosphatase PTPsigma        | 3512.156  |
| 6565 | RC_AA004637_at_NA_illumina     | EST: zh92b04.s1 Soares fetal liver spleen    | 3512.1726 |
| 6566 | X95238_s_at_NA_illumina        | H.sapiens mRNA for cysteine-rich             | 3512.269  |
| 6567 | N78437_at_NA_illumina          | EST: yz76d04.r1 Homo sapiens cDNA            | 3512.2917 |

|      |                                |                                           |           |
|------|--------------------------------|-------------------------------------------|-----------|
| 6568 | W51955_at_NA_illumina          | EST: zc45e07.r1 Soares senescent          | 3512.2932 |
| 6569 | RC_AA281337_at_NA_illumina     | EST: zs94g02.s1 NCI_CGAP_GCB1             | 3512.3105 |
| 6570 | W68502_at_GI_19923511-S        | EST: zd36a07.r1 Soares fetal heart        | 3512.3184 |
| 6571 | L03427_at_NA_illumina          | BASONUCLIN                                | 3512.4734 |
| 6572 | R66922_at_NA_illumina          | EST: yi25f10.r1 Homo sapiens cDNA clone   | 3512.5093 |
| 6573 | S49953_s_at_NA_illumina        | N-cym                                     | 3512.5098 |
| 6574 | AA446139_at_GI_40548417-A      | EST: zw64a03.r1 Soares testis NHT Homo    | 3512.5266 |
| 6575 | AA318511_at_GI_23308552-S      | EST20594 Spleen I Homo sapiens cDNA       | 3512.566  |
| 6576 | U13616_at_GI_32967598-A        | ANK3 Ankyrin G                            | 3512.567  |
| 6577 | D38462_at_NA_illumina          | A1 chain of type XIX collagen, exon +3'   | 3512.5728 |
| 6578 | X15722_at_GI_10835188-S        | Glutathione reductase (EC 1.6.4.2)        | 3512.5842 |
| 6579 | AA203338_at_GI_37588860-A      | Homo sapiens hypothetical SBBI03 protein  | 3512.5898 |
| 6580 | M19311_at_GI_20428653-S        | CALM1 Calmodulin 1 (phosphorylase         | 3512.6414 |
| 6581 | N99787_at_NA_illumina          | EST: zb26h12.r1 Homo sapiens cDNA         | 3512.6506 |
| 6582 | H06593_at_NA_illumina          | YI82b03.r1 Homo sapiens cDNA clone        | 3512.651  |
| 6583 | R33301_at_NA_illumina          | EST: yh81g01.r1 Homo sapiens cDNA         | 3512.6719 |
| 6584 | N79354_at_NA_illumina          | EST: yz73a08.r1 Homo sapiens cDNA         | 3512.675  |
| 6585 | RC_AA290745_at_GI_31982944-S   | EST: zt22h02.s1 Soares ovary tumor        | 3512.7344 |
| 6586 | D82675_at_GI_31542866-S        | EST: similar to none, mRNA sequence.      | 3512.746  |
| 6587 | RC_AA228118_at_NA_illumina     | Homo sapiens E1-like protein mRNA,        | 3512.7466 |
| 6588 | X78678_at_GI_4557692-A         | KHK Ketohexokinase (fructokinase)         | 3512.7664 |
| 6589 | RC_AA485686_at_NA_illumina     | EST: zx91d07.s1 Soares ovary tumor        | 3512.8064 |
| 6590 | X63741_s_at_GI_31317227-S      | Pilot mRNA                                | 3512.8127 |
| 6591 | RC_AA453437_at_NA_illumina     | EST: zx32h05.s1 Soares total fetus        | 3512.844  |
| 6592 | RC_AA252374_at_NA_illumina     | EST: zs12f12.s1 NCI_CGAP_GCB1 Homo        | 3512.8635 |
| 6593 | RC_D20303_at_NA_illumina       | EST: Human HL60 3'directed Mbol cDNA,     | 3512.8662 |
| 6594 | X95406_at_NA_illumina          | Cyclin E gene                             | 3512.8787 |
| 6595 | RC_AA167436_i_at_NA_illumina   | EST: zp08f09.s1 Stratagene ovarian        | 3512.879  |
| 6596 | HG3491-HT3685_at_NA_illumina   | Zinc Finger Protein Zfp-36                | 3512.9448 |
| 6597 | RC_D59354_i_at_NA_illumina     | EST: Human fetal brain cDNA 3'-end GEN-   | 3512.9739 |
| 6598 | AA127867_at_NA_illumina        | EST: zl12a03.r1 Soares pregnant uterus    | 3512.9897 |
| 6599 | L33477_at_GI_16445392-S        | (clone 8B1) Br-cadherin mRNA              | 3513.0066 |
| 6600 | D28235_s_at_GI_4506264-S       | Cyclooxygenase-2 (hCox-2) gene            | 3513.009  |
| 6601 | U03056_at_GI_24497573-A        | Hyaluronoglucosaminidase 1 (HYAL1)        | 3513.0142 |
| 6602 | U24183_s_at_GI_39725712-S      | PFKM Phosphofructokinase, muscle          | 3513.039  |
| 6603 | Z00010_at_NA_illumina          | Germ line pseudogene for immunoglobulin   | 3513.0554 |
| 6604 | W73205_at_NA_illumina          | H.sapiens mRNA for ITBA2 protein          | 3513.1497 |
| 6605 | M77235_at_GI_37622905-A        | Cardiac tetrodotoxin-insensitive voltage- | 3513.1597 |
| 6606 | HG1227-HT1227_s_at_NA_illumina | Collagen, Type Ii, Alpha 1                | 3513.2053 |
| 6607 | X59656_at_GI_34452719-S        | CRKL V-crk avian sarcoma virus CT10       | 3513.228  |
| 6608 | M38180_rna1_at_GI_4504506-S    | 3-beta-hydroxysteroid                     | 3513.2378 |
| 6609 | HG4310-HT4580_at_NA_illumina   | Cellular Retinol Binding Protein Ii       | 3513.3108 |
| 6610 | R76373_at_NA_illumina          | EST: yi61f07.r1 Homo sapiens cDNA clone   | 3513.318  |

|      |                              |                                           |           |
|------|------------------------------|-------------------------------------------|-----------|
| 6611 | W05597_at_NA_illumina        | Budding uninhibited by benzimidazoles 1   | 3513.3667 |
| 6612 | W78726_at_GI_38327571-A      | EST: zh51h04.r1 Soares fetal liver spleen | 3513.3792 |
| 6613 | D14822_at_NA_illumina        | Chimeric mRNA derived from AML1 gene      | 3513.385  |
| 6614 | S69232_at_GI_4758311-S       | Electron transfer flavoprotein-ubiquinone | 3513.393  |
| 6615 | RC_AA398708_at_NA_illumina   | Cell division cycle 10 (homologous to     | 3513.454  |
| 6616 | RC_AA609592_at_GI_16554600-S | EST: af15d11.s1 Soares testis NHT Homo    | 3513.4656 |
| 6617 | D00003_s_at_NA_illumina      | CYP3A3 Cytochrome P450 IIIA3              | 3513.5906 |
| 6618 | RC_AA206432_at_GI_37655174-S | EST: zq51e01.s1 Stratagene                | 3513.6313 |
| 6619 | RC_AA443795_at_NA_illumina   | EST: zw86f01.s1 Soares total fetus        | 3513.6436 |
| 6620 | L11708_at_GI_4504502-S       | HSD17B2 17 beta hydroxysteroid            | 3513.6885 |
| 6621 | M23234_s_at_GI_9961251-A     | PGY3 P glycoprotein 3/multiple drug       | 3513.7068 |
| 6622 | RC_AA495932_at_NA_illumina   | EST: zw05h04.s1 Soares NhHMPu S1          | 3513.7112 |
| 6623 | X81832_s_at_NA_illumina      | GIPR Gastric inhibitory polypeptide       | 3513.719  |
| 6624 | C14915_at_NA_illumina        | Homo sapiens Chromosome 16 BAC clone      | 3513.754  |
| 6625 | RC_AA443277_at_GI_4505716-S  | Peroxisomal biogenesis factor 11A         | 3513.8135 |
| 6626 | HG3104-HT3280_at_NA_illumina | Serine Protease Met1                      | 3513.8389 |
| 6627 | U60873_at_NA_illumina        | Clone 137308 mRNA, partial cds            | 3513.8518 |
| 6628 | RC_AA007189_at_NA_illumina   | EST: 13cDNA46-3.seq Soares infant brain   | 3513.8735 |
| 6629 | U46744_at_GI_42717993-A      | Dystrobrevin-alpha mRNA                   | 3513.9036 |
| 6630 | U18991_at_GI_4506590-S       | RPE65 Retinal pigment epithelium-specific | 3513.943  |
| 6631 | RC_AA400508_at_GI_7706570-A  | EST: zu70d02.s1 Soares testis NHT Homo    | 3513.946  |
| 6632 | D79100_at_GI_34147678-S      | EST: Human placenta cDNA 5'-end GEN-      | 3513.9993 |
| 6633 | RC_AA025351_at_GI_13376090-S | EST: ze74h03.s1 Soares fetal heart        | 3514.0007 |
| 6634 | J05401_at_GI_4502854-S       | CKMT2 Creatine kinase, mitochondrial 2    | 3514.0393 |
| 6635 | M28585_f_at_GI_4504592-S     | IFNA16 Interferon, alpha 16               | 3514.043  |
| 6636 | AA263056_at_NA_illumina      | EST: PMY0404 KG1-a Lambda Zap             | 3514.0444 |
| 6637 | U73738_at_NA_illumina        | Calcium/calmodulin-dependent protein      | 3514.074  |
| 6638 | U20362_at_NA_illumina        | Tg737 mRNA                                | 3514.0952 |
| 6639 | RC_AA018441_at_NA_illumina   | EST: ze50a08.s1 Soares retina N2b4HR      | 3514.1082 |
| 6640 | U81262_at_GI_33359689-S      | EPLG5 Eph-related receptor tyrosine       | 3514.1248 |
| 6641 | RC_AA609642_at_NA_illumina   | EST: af16a06.s1 Soares testis NHT Homo    | 3514.137  |
| 6642 | M15656_at_GI_40354204-S      | ALDOB Aldolase B, fructose-bisphosphate   | 3514.1875 |
| 6643 | W27076_at_NA_illumina        | EST: 22g11 Human retina cDNA randomly     | 3514.2175 |
| 6644 | X83535_s_at_GI_13027797-S    | Membrane-type matrix metalloproteinase    | 3514.2266 |
| 6645 | X02883_at_NA_illumina        | TCRA T cell receptor alpha-chain          | 3514.251  |
| 6646 | U52827_at_NA_illumina        | Cri-du-chat region mRNA, clone NIBB11     | 3514.2917 |
| 6647 | D13305_at_GI_33356159-S      | CCKBR Cholecystokinin B receptor          | 3514.3123 |
| 6648 | RC_AA281245_at_NA_illumina   | EST: zs94d07.s1 NCI_CGAP_GCB1             | 3514.3274 |
| 6649 | U67092_at_NA_illumina        | Ataxia-telangiectasia locus protein (ATM) | 3514.3855 |
| 6650 | RC_D60475_at_NA_illumina     | EST: Human fetal brain cDNA 3'-end GEN-   | 3514.3872 |
| 6651 | U32376_at_GI_4557526-S       | Channel associated protein of synapse     | 3514.414  |
| 6652 | L42452_at_GI_4885544-S       | Pyruvate dehydrogenase kinase             | 3514.4248 |
| 6653 | S76853_s_at_NA_illumina      | Cerebrin-50=cerebrospinal fluid protein   | 3514.4468 |

|      |                                |                                           |           |
|------|--------------------------------|-------------------------------------------|-----------|
| 6654 | RC_AA005196_at_GI_37537515-S   | EST: zh95g08.s1 Soares fetal liver spleen | 3514.49   |
| 6655 | U39576_at_GI_4502474-S         | BTN Butyrophilin                          | 3514.5188 |
| 6656 | N88108_at_GI_33620750-S        | Homo sapiens mRNA for KIAA0908            | 3514.5515 |
| 6657 | W28152_at_GI_34878776-S        | EST: 43f7 Human retina cDNA randomly      | 3514.57   |
| 6658 | W27334_at_NA_illumina          | Amyloid beta (A4) precursor protein       | 3514.574  |
| 6659 | AA455860_s_at_GI_21450858-S    | EST: aa01a12.r1 Soares NhHMPu S1          | 3514.5757 |
| 6660 | RC_AA398423_at_GI_30466257-S   | EST: zt62a05.s1 Soares testis NHT Homo    | 3514.578  |
| 6661 | HG270-HT270_at_NA_illumina     | Lymphocyte Chemoattractant Factor         | 3514.6023 |
| 6662 | RC_AA156858_at_GI_30795214-A   | EST: zl20d08.s1 Soares pregnant uterus    | 3514.6077 |
| 6663 | RC_AA452599_at_GI_37675279-A   | EST: zx39g05.s1 Soares total fetus        | 3514.6213 |
| 6664 | M94893_at_NA_illumina          | TSPY Testis specific protein, Y-linked    | 3514.6328 |
| 6665 | U33837_at_GI_6806918-S         | Glycoprotein receptor gp330 precursor,    | 3514.7937 |
| 6666 | L07949_at_GI_4504058-S         | GNRHR Gonadotropin-releasing hormone      | 3514.8423 |
| 6667 | RC_AA443147_at_GI_13124755-S   | Homo sapiens mRNA for KIAA0582            | 3514.848  |
| 6668 | U49114_at_GI_20336245-S        | Prohormone convertase 5 precursor (PC5)   | 3514.859  |
| 6669 | J00098_cds1_s_at_NA_illumina   | Apolipoprotein C-III::apolipoprotein A-I  | 3514.8784 |
| 6670 | R81217_at_NA_illumina          | Yj03b09.r1 Homo sapiens cDNA clone        | 3514.9006 |
| 6671 | D31628_s_at_GI_38016938-S      | 4-HYDROXYPHENYLPYRUVATE                   | 3514.9292 |
| 6672 | AA442154_at_GI_5454101-S       | Zw56h09.r1 Soares total fetus Nb2HF8 9w   | 3514.962  |
| 6673 | RC_AA001983_at_NA_illumina     | EST: zh83h06.s1 Soares fetal liver spleen | 3514.966  |
| 6674 | AA082668_at_NA_illumina        | ADP-ribosylation factor 1                 | 3514.9858 |
| 6675 | AC002115_cds4_at_GI_21264372-S | UPKA gene extracted from Human DNA        | 3515.0295 |
| 6676 | RC_AA599629_at_GI_42662437-S   | EST: ag10a01.s1 Gessler Wilms tumor       | 3515.0537 |
| 6677 | AA488935_at_GI_21735565-A      | EST: aa55c10.r1 NCI_CGAP_GCB1 Homo        | 3515.0845 |
| 6678 | Z69923_at_GI_32455241-S        | HEPATOCYTE GROWTH FACTOR                  | 3515.0889 |
| 6679 | AA347868_at_NA_illumina        | EST: EST54275 Fetal heart II Homo         | 3515.1008 |
| 6680 | RC_D11922_at_GI_33413413-S     | Human HepG2 3'-directed Mbol cDNA,        | 3515.1255 |
| 6681 | RC_AA149044_at_GI_7706185-S    | EST: zl45d09.s1 Soares pregnant uterus    | 3515.1318 |
| 6682 | RC_D19609_at_NA_illumina       | EST: Human HL60 3'directed Mbol cDNA,     | 3515.138  |
| 6683 | U72648_s_at_GI_15718672-S      | Alpha2-C4-adrenergic receptor gene        | 3515.1414 |
| 6684 | RC_AA017095_at_NA_illumina     | EST: ze37h12.s1 Soares retina N2b4HR      | 3515.1445 |
| 6685 | RC_AA052947_r_at_NA_illumina   | EST: zl70d10.s1 Stratagene colon          | 3515.1475 |
| 6686 | R93659_at_NA_illumina          | Homo sapiens mRNA for KIAA0871            | 3515.2046 |
| 6687 | AA347768_at_NA_illumina        | EST: EST54148 Fetal heart II Homo         | 3515.2283 |
| 6688 | M37825_at_GI_15055548-A        | PROTEIN FGF-5 PRECURSOR                   | 3515.2559 |
| 6689 | M62626_s_at_NA_illumina        | Human T lymphocyte homeobox protein       | 3515.2744 |
| 6690 | RC_AA243442_at_NA_illumina     | Homo sapiens clone 192 Rer1 mRNA,         | 3515.2913 |
| 6691 | RC_AA019207_at_NA_illumina     | EST: ze57f08.s1 Soares retina N2b4HR      | 3515.3    |
| 6692 | U28015_at_GI_4757913-S         | TY protease                               | 3515.302  |
| 6693 | RC_AA226828_at_NA_illumina     | EST: zr19a09.s1 Stratagene NT2 neuronal   | 3515.3079 |
| 6694 | RC_AA156933_at_NA_illumina     | EST: zl19b01.s1 Soares pregnant uterus    | 3515.312  |
| 6695 | X63522_s_at_NA_illumina        | RETINOIC ACID RECEPTOR RXR-BETA           | 3515.326  |
| 6696 | X69090_at_GI_4505312-S         | Skeletal muscle 190kD protein             | 3515.3474 |

|      |                                |                                            |           |
|------|--------------------------------|--------------------------------------------|-----------|
| 6697 | U17977_at_GI_19913417-S        | HSU17977 Homo sapiens cDNA                 | 3515.5076 |
| 6698 | S62904_s_at_GI_4507652-S       | TPMT Thiopurine S-methyltransferase        | 3515.5813 |
| 6699 | K03204_f_at_NA_illumina        | PRB1 locus salivary proline-rich protein   | 3515.636  |
| 6700 | HG880-HT880_s_at_NA_illumina   | Mucin 6, Gastric (Gb:L07517)               | 3515.6453 |
| 6701 | HG2591-HT2687_s_at_NA_illumina | Transcription Factor Irf-1                 | 3515.6877 |
| 6702 | U48213_at_GI_31542492-S        | DBP Albumin D-box binding protein          | 3515.7346 |
| 6703 | X97230_f_at_GI_33589849-A      | NK receptor, clone library 4M1#6           | 3515.766  |
| 6704 | RC_AA224147_at_NA_illumina     | EST: zr15e06.s1 Stratogene NT2 neuronal    | 3515.783  |
| 6705 | M58600_rna1_at_GI_7262380-S    | Heparin cofactor II (HCF2) gene, exons 1   | 3515.7993 |
| 6706 | HG3731-HT4001_r_at_NA_illumina | Immunoglobulin Heavy Chain, Vdjrc          | 3515.8394 |
| 6707 | W25945_at_NA_illumina          | EST: 17c5 Human retina cDNA randomly       | 3515.8564 |
| 6708 | Y09846_rna1_at_NA_illumina     | SHC (Src homology 2 domain-containing)     | 3515.87   |
| 6709 | M19481_at_GI_7242221-A         | Follistatin gene                           | 3515.8743 |
| 6710 | RC_AA002006_at_NA_illumina     | EST: zh86a01.s1 Soares fetal liver spleen  | 3515.9033 |
| 6711 | RC_AA236481_at_GI_22208998-S   | EST: zr75d02.s1 Soares NhHMPu S1           | 3515.9346 |
| 6712 | D38751_at_GI_6453817-S         | Kid (kinesin-like DNA binding protein)     | 3515.9539 |
| 6713 | W27425_at_NA_illumina          | EST: 32e3 Human retina cDNA randomly       | 3515.9636 |
| 6714 | X90568_at_GI_20143915-A        | TTN Titin                                  | 3515.982  |
| 6715 | X58298_s_at_NA_illumina        | IL6R Interleukin 6 receptor                | 3516.0017 |
| 6716 | Y11709_at_NA_illumina          | Extracellular matrix protein collagen type | 3516.0283 |
| 6717 | U52153_at_GI_25121967-S        | Inwardly rectifying potassium channel      | 3516.035  |
| 6718 | U04810_at_GI_33438581-S        | DbpB-like protein mRNA                     | 3516.0808 |
| 6719 | W26975_at_NA_illumina          | EST: 17a2 Human retina cDNA randomly       | 3516.0925 |
| 6720 | AA293544_at_NA_illumina        | D component of complement (adipsin)        | 3516.0977 |
| 6721 | RC_AA495811_at_NA_illumina     | EST: zw05c08.s1 Soares NhHMPu S1           | 3516.1125 |
| 6722 | M90354_at_NA_illumina          | BTF3 protein homologue gene                | 3516.1584 |
| 6723 | RC_AA243560_at_NA_illumina     | EST: zs15h05.s1 NCI_CGAP_GCB1              | 3516.161  |
| 6724 | W00904_at_NA_illumina          | EST: za52d12.r1 Soares fetal liver spleen  | 3516.171  |
| 6725 | HG3400-HT3579_at_NA_illumina   | Nestin                                     | 3516.1824 |
| 6726 | HG2686-HT2782_at_NA_illumina   | Ryanodine Receptor 3                       | 3516.2007 |
| 6727 | RC_AA293270_at_NA_illumina     | EST: zt38c05.s1 Soares ovary tumor         | 3516.2358 |
| 6728 | U91618_at_GI_31563516-S        | Proneurotensin/proneuromedin N mRNA        | 3516.236  |
| 6729 | RC_AA621718_at_GI_41393557-S   | EST: af54f07.s1 Soares total fetus         | 3516.2441 |
| 6730 | U40380_at_NA_illumina          | PSEN1 Presenilin 1 (Alzheimer disease 3)   | 3516.339  |
| 6731 | AA364076_at_NA_illumina        | EST: EST74594 Pineal gland II Homo         | 3516.348  |
| 6732 | D88146_at_NA_illumina          | UDP-galactose transporter 2                | 3516.374  |
| 6733 | U82321_at_GI_6274549-S         | Clone 14.9B mRNA sequence                  | 3516.3774 |
| 6734 | D61871_r_at_GI_26051232-A      | EST: Human aorta cDNA 5'-end GEN-          | 3516.3843 |
| 6735 | AA431926_at_NA_illumina        | PTPL1-associated RhoGAP 1                  | 3516.4043 |
| 6736 | M31661_at_GI_40254435-S        | PRLR Prolactin receptor                    | 3516.455  |
| 6737 | HG2152-HT2222_at_NA_illumina   | Zinc Finger Protein 92                     | 3516.476  |
| 6738 | RC_AA599699_at_NA_illumina     | EST: ag10h08.s1 Gessler Wilms tumor        | 3516.4893 |
| 6739 | AA443460_at_GI_16596685-S      | EST: zw94f06.r1 Soares total fetus         | 3516.5088 |

|      |                                |                                            |           |
|------|--------------------------------|--------------------------------------------|-----------|
| 6740 | W27961_at_NA_illumina          | EST: 40a4 Human retina cDNA randomly       | 3516.541  |
| 6741 | M19720_rna2_at_NA_illumina     | L-myc gene (L-myc protein) extracted from  | 3516.5872 |
| 6742 | M19720_rna2_at-2_NA_illumina   | V-myc avian myelocytomatosis viral         | 3516.5872 |
| 6743 | D87002_cds2_at_NA_illumina     | POM121-like 1 gene extracted from          | 3516.5967 |
| 6744 | HG3565-HT3768_at_NA_illumina   | Zinc Finger Protein (Gb:M88357)            | 3516.6008 |
| 6745 | RC_D60386_at_NA_illumina       | EST: Human fetal brain cDNA 3'-end GEN-    | 3516.6304 |
| 6746 | W25933_at_GI_40806212-S        | EST: 15b2 Human retina cDNA randomly       | 3516.707  |
| 6747 | AA126812_at_GI_34147326-S      | Homo sapiens mRNA for KIAA0690             | 3516.7078 |
| 6748 | RC_AA041197_at_NA_illumina     | EST: zf09e07.s1 Soares fetal heart         | 3516.7495 |
| 6749 | HG31111-HT3287_at_NA_illumina  | Autoantigen (Gb:S67069)                    | 3516.7769 |
| 6750 | U84249_at_GI_4505072-S         | Annexin VI (p68)                           | 3516.7856 |
| 6751 | RC_AA037651_at_NA_illumina     | EST: zk34e10.s1 Soares pregnant uterus     | 3516.7876 |
| 6752 | D26561_cds1_at_NA_illumina     | ORF for L1 protein gene extracted from     | 3516.7947 |
| 6753 | AA249437_at_NA_illumina        | EST: j3966.seq.F Human fetal heart,        | 3516.8076 |
| 6754 | RC_AA007250_at_GI_37545373-S   | EST: 13cDNA81-3.seq Soares infant brain    | 3516.8394 |
| 6755 | X94628_rna1_s_at_NA_illumina   | MeCP-2 gene                                | 3516.8643 |
| 6756 | RC_AA455170_at_NA_illumina     | EST: aa15d11.s1 Soares NhHMPu S1           | 3516.8652 |
| 6757 | AA056958_at_NA_illumina        | Tumor suppressing subtransferable          | 3516.8833 |
| 6758 | X07881_rna1_f_at_GI_41349487-S | Human gene PRB3L for proline-rich          | 3517.0154 |
| 6759 | D63484_at_NA_illumina          | KIAA0150 gene, partial cds                 | 3517.1328 |
| 6760 | U11098_cds3_s_at_NA_illumina   | Human hydroxyindole-O-methyltransferase    | 3517.1428 |
| 6761 | RC_AA007629_at_GI_33695087-S   | Glycerol-3-phosphate dehydrogenase 1       | 3517.1914 |
| 6762 | D49742_at_GI_20302151-S        | HGF activator like protein                 | 3517.2112 |
| 6763 | X83301_s_at_NA_illumina        | SMA5 mRNA                                  | 3517.28   |
| 6764 | U67988_at_GI_19923273-S        | Guanylate kinase associated protein        | 3517.2915 |
| 6765 | Y11174_at_GI_10800411-S        | RP3 gene                                   | 3517.3457 |
| 6766 | RC_AA001399_at_GI_31377734-S   | EST: ze45b05.s1 Soares retina N2b4HR       | 3517.3472 |
| 6767 | W28510_at_NA_illumina          | Calmodulin 1 (phosphorylase kinase,        | 3517.3767 |
| 6768 | AA287749_at_NA_illumina        | Zs51b11.r1 NCI_CGAP_GCB1 Homo              | 3517.429  |
| 6769 | R63545_at_GI_21389518-S        | EST: yi09a01.r1 Homo sapiens cDNA          | 3517.4382 |
| 6770 | L20433_at_GI_20127494-S        | Octamer binding transcription factor 1     | 3517.4888 |
| 6771 | AA047045_at_NA_illumina        | EST: zf50d12.r1 Soares retina N2b4HR       | 3517.4954 |
| 6772 | C06238_at_GI_26553431-S        | Homo sapiens clone 24700 unknown           | 3517.5269 |
| 6773 | L38025_at_GI_22212916-A        | CNTFR Ciliary neurotrophic factor receptor | 3517.5647 |
| 6774 | RC_AA135554_at_NA_illumina     | EST: zl09g08.s1 Soares pregnant uterus     | 3517.5767 |
| 6775 | W01568_at_NA_illumina          | EST: za36b07.r1 Soares fetal liver spleen  | 3517.5823 |
| 6776 | R10529_at_NA_illumina          | IG KAPPA CHAIN C REGION                    | 3517.624  |
| 6777 | U72513_at_NA_illumina          | Human RPL13-2 pseudogene mRNA,             | 3517.6736 |
| 6778 | RC_AA461190_at_NA_illumina     | EST: zx70e07.s1 Soares total fetus         | 3517.6753 |
| 6779 | M85085_at_GI_4557492-S         | CSTF2 Cleavage stimulation factor, 3' pre- | 3517.6785 |
| 6780 | L07077_at_GI_4503496-S         | EHHADH Enyol-coA: hydratase 3-             | 3517.6912 |
| 6781 | AA343629_at_GI_21464130-A      | Homo sapiens mRNA for neuropsin,           | 3517.722  |
| 6782 | X84746_at_NA_illumina          | Histo-blood group AB0 gene, exon 1         | 3517.7512 |

|      |                                |                                            |           |
|------|--------------------------------|--------------------------------------------|-----------|
| 6783 | RC_AA478630_at_GI_29789007-S   | EST: zv19g11.s1 Soares NhHMPu S1           | 3517.7734 |
| 6784 | D61596_at_NA_illumina          | Human fetal brain cDNA 5'-end GEN-         | 3517.799  |
| 6785 | RC_AA401401_f_at_GI_4758893-S  | PET112 (yeast homolog)-like                | 3517.8135 |
| 6786 | RC_AA427947_at_NA_illumina     | EST: zw50e09.s1 Soares total fetus         | 3517.8137 |
| 6787 | AA303711_at_NA_illumina        | Ephrin-B1                                  | 3517.851  |
| 6788 | J04156_at_GI_28610152-S        | IL7 Interleukin 7                          | 3517.873  |
| 6789 | X82018_at_GI_34222260-S        | ZID protein                                | 3517.8787 |
| 6790 | RC_AA400490_at_NA_illumina     | EST: zu70a04.s1 Soares testis NHT Homo     | 3517.887  |
| 6791 | U57721_at_GI_4504936-S         | L-kynurenine hydrolase mRNA                | 3517.9033 |
| 6792 | J04513_at_GI_41352694-S        | Basic fibroblast growth factor (bFGF) 22.5 | 3517.908  |
| 6793 | AA424083_at_NA_illumina        | EST: zv80b06.r1 Soares total fetus         | 3517.9287 |
| 6794 | RC_AA016227_at_NA_illumina     | EST: ze17g03.s1 Soares fetal heart         | 3517.971  |
| 6795 | HG2075-HT2137_s_at_NA_illumina | Camp-Responsive Element Modulator, Alt.    | 3518.0012 |
| 6796 | RC_AA417034_at_GI_38045953-S   | EST: zu04f10.s1 Soares testis NHT Homo     | 3518.0159 |
| 6797 | W25905_at_NA_illumina          | EST: 14g5 Human retina cDNA randomly       | 3518.032  |
| 6798 | AA359093_at_NA_illumina        | EST68047 Fetal lung II Homo sapiens        | 3518.0337 |
| 6799 | RC_AA453451_at_NA_illumina     | EST: zx45a09.s1 Soares testis NHT Homo     | 3518.0493 |
| 6800 | M60314_at_GI_24797149-S        | Transforming growth factor-beta (tgf-beta) | 3518.0564 |
| 6801 | U63139_at_GI_19924130-A        | Rad50 (Rad50) mRNA                         | 3518.0686 |
| 6802 | W26853_at_NA_illumina          | EST: 17b3 Human retina cDNA randomly       | 3518.0725 |
| 6803 | X12901_at_GI_6005943-S         | VILLIN                                     | 3518.0925 |
| 6804 | U07882_at_GI_27734716-S        | OPRD1 Opioid receptor, delta 1             | 3518.1008 |
| 6805 | U91616_at_GI_4758805-S         | I kappa B epsilon (IkBe) mRNA              | 3518.1223 |
| 6806 | U93091_at_GI_19924152-A        | Toll protein homolog mRNA and LINE-1       | 3518.1255 |
| 6807 | X81001_at_NA_illumina          | H.sapiens HCG II mRNA                      | 3518.1555 |
| 6808 | D26135_at-2_NA_illumina        | Diacylglycerol kinase, gamma (90kD)        | 3518.1694 |
| 6809 | D26135_at_GI_4503314-S         | DAGK3 Diacylglycerol kinase, gamma         | 3518.1694 |
| 6810 | AA333919_s_at_GI_45433500-S    | EST: EST38321 Embryo, 9 week Homo          | 3518.184  |
| 6811 | RC_AA010619_at_NA_illumina     | EST: zi09g09.s1 Soares fetal liver spleen  | 3518.1846 |
| 6812 | R84608_at_NA_illumina          | EST: yo37h09.r1 Homo sapiens cDNA          | 3518.2417 |
| 6813 | RC_AA478740_at_GI_7657101-S    | EST: zv14g12.s1 Soares NhHMPu S1           | 3518.244  |
| 6814 | D26350_at_GI_4504792-S         | Type 2 inositol 1,4,5-trisphosphate        | 3518.2754 |
| 6815 | W27614_at_GI_10864012-S        | EST: 35c12 Human retina cDNA randomly      | 3518.2927 |
| 6816 | N73185_at_NA_illumina          | EST: yv46a09.r1 Homo sapiens cDNA          | 3518.3242 |
| 6817 | H86858_at_NA_illumina          | EST: ys72d05.r1 Homo sapiens cDNA          | 3518.3562 |
| 6818 | RC_AA232128_at_NA_illumina     | Sarcoglycan, epsilon                       | 3518.3843 |
| 6819 | AA476894_at_NA_illumina        | Neuronal PAS domain protein 2              | 3518.394  |
| 6820 | RC_AA487576_at_GI_20070361-S   | EST: ab23g01.s1 Stratagene lung            | 3518.394  |
| 6821 | L40357_at_GI_23238230-A        | Thyroid receptor interactor (TRIP7) mRNA,  | 3518.413  |
| 6822 | U72671_at_GI_12545403-S        | Telencephalin precursor mRNA               | 3518.4272 |
| 6823 | AA278413_at_GI_9910279-S       | EST: zs81h05.r1 NCI_CGAP_GCB1 Homo         | 3518.473  |
| 6824 | M19888_at_GI_4507186-S         | SPRR1B Small proline-rich protein 1B       | 3518.4766 |
| 6825 | RC_AA505117_at_NA_illumina     | EST: aa65b09.s1 NCI_CGAP_GCB1              | 3518.5132 |

|      |                              |                                            |           |
|------|------------------------------|--------------------------------------------|-----------|
| 6826 | U41816_at_GI_12408676-S      | C-1 mRNA                                   | 3518.5144 |
| 6827 | U41816_at-2_NA_illumina      | Prefoldin 4                                | 3518.5144 |
| 6828 | U31215_s_at_NA_illumina      | Metabotropic glutamate receptor 1 alpha    | 3518.5244 |
| 6829 | M37485_cds1_at_NA_illumina   | IGH@ gene (Ig Dxp heavy-chain gene)        | 3518.5342 |
| 6830 | X71348_at_GI_4507396-A       | Variant hepatic nuclear factor 1 (vHNF1)   | 3518.537  |
| 6831 | RC_AA418545_at_GI_38146093-S | EST: zv93b06.s1 Soares NhHMPu S1           | 3518.538  |
| 6832 | L27584_s_at_GI_40316927-S    | CAB3b mRNA for calcium channel beta3       | 3518.544  |
| 6833 | HG1098-HT1098_at_NA_illumina | Cystatin D                                 | 3518.5562 |
| 6834 | U80034_at_GI_5174566-S       | Mitochondrial intermediate peptidase       | 3518.578  |
| 6835 | U79286_at_GI_4504494-S       | Arginine methyltransferase mRNA            | 3518.6177 |
| 6836 | RC_D25942_r_at_NA_illumina   | EST: Human colon 3'directed Mbol cDNA,     | 3518.6216 |
| 6837 | M95925_at_GI_5453801-S       | Leucine zipper on the D14S46E locus        | 3518.6409 |
| 6838 | M82827_s_at_NA_illumina      | Fusion protein mRNA                        | 3518.6543 |
| 6839 | RC_AA620361_at_NA_illumina   | EST: af07d11.s1 Soares testis NHT Homo     | 3518.6663 |
| 6840 | RC_AA495827_s_at_NA_illumina | EST: zw05e08.s1 Soares NhHMPu S1           | 3518.6685 |
| 6841 | RC_AA262654_at_NA_illumina   | EST: zs21g07.s1 NCI_CGAP_GCB1              | 3518.6748 |
| 6842 | Z70723_at_GI_31880793-S      | SERUM                                      | 3518.6782 |
| 6843 | U09850_at-2_NA_illumina      | Zinc finger protein 143 (clone pHZ-1)      | 3518.717  |
| 6844 | U09850_at_GI_24475652-S      | ZNF143 Zinc finger protein 143 (clone pHZ- | 3518.717  |
| 6845 | U76376_at_NA_illumina        | Harakiri, BCL2-interacting protein         | 3518.7356 |
| 6846 | M11321_at_GI_32483409-S      | GC Group-specific component (vitamin D     | 3518.7683 |
| 6847 | AA262100_at_NA_illumina      | Zs23c10.r1 NCI_CGAP_GCB1 Homo              | 3518.7788 |
| 6848 | U41763_at_GI_4502902-A       | CLTC Clathrin heavy chain {alternative     | 3518.7793 |
| 6849 | AA203297_at_NA_illumina      | Orphan nuclear hormone receptor            | 3518.7815 |
| 6850 | H81340_at_NA_illumina        | EST: yu74d04.r1 Homo sapiens cDNA          | 3518.787  |
| 6851 | M23533_at_GI_15718669-S      | Alpha 2 adrenergic receptor gene           | 3518.823  |
| 6852 | U68031_at_NA_illumina        | G protein-coupled receptor (STRL22)        | 3518.83   |
| 6853 | RC_D56989_i_at_NA_illumina   | EST: Human aorta cDNA 3'-end GEN-          | 3518.8323 |
| 6854 | RC_AA428150_at_GI_13375755-S | EST: zw57c05.s1 Soares total fetus         | 3518.8757 |
| 6855 | AA090632_at_GI_7705739-S     | EST: y1095.seq.F Fetal heart, Lambda       | 3518.8965 |
| 6856 | U79300_at-2_NA_illumina      | Human clone 23629 mRNA sequence            | 3518.9111 |
| 6857 | U79300_at_NA_illumina        | Clone 23629 mRNA sequence                  | 3518.9111 |
| 6858 | RC_AA621763_at_GI_37541754-S | EST: af06d06.s1 Soares testis NHT Homo     | 3518.9258 |
| 6859 | X16707_at_GI_34734076-S      | FOS-RELATED ANTIGEN 1                      | 3518.933  |
| 6860 | W28128_at_NA_illumina        | EST: 42f4 Human retina cDNA randomly       | 3518.936  |
| 6861 | AFFX-LysX-M_at_NA_illumina   | AFFX-LysX-M_at (endogenous control)        | 3518.9636 |
| 6862 | AFFX-LysX-M_at-2_NA_illumina | AFFX-LysX-M_at (miscellaneous control -    | 3518.9636 |
| 6863 | U66033_at_GI_34106705-S      | Glypican-5 (GPC5) mRNA                     | 3519.0203 |
| 6864 | W00799_at_GI_15451841-A      | Eukaryotic translation elongation factor 1 | 3519.0254 |
| 6865 | U78166_at_NA_illumina        | Human Ras-like small GTPase RIBA           | 3519.0276 |
| 6866 | M64358_at_NA_illumina        | Rhom-3 gene, exon                          | 3519.031  |
| 6867 | RC_AA479212_at_NA_illumina   | Homo sapiens mRNA for KIAA0877             | 3519.0417 |
| 6868 | AA043157_at_GI_11545856-S    | Zk48f06.r1 Soares pregnant uterus          | 3519.0784 |



|      |                                |                                                               |           |
|------|--------------------------------|---------------------------------------------------------------|-----------|
| 6869 | M60556_rna2_at_NA_illumina     | TGFB3 gene (transforming growth factor-                       | 3519.1113 |
| 6870 | M18731_at_GI_22165415-A        | GALT Galactose-1-phosphate                                    | 3519.131  |
| 6871 | AA434498_at_GI_8922813-S       | EST: zw31b09.r1 Soares ovary tumor                            | 3519.1318 |
| 6872 | AA477919_at_GI_15100150-S      | Zu39b08.r1 Soares ovary tumor NbHOT                           | 3519.1758 |
| 6873 | X86400_at_NA_illumina          | Gamma subunit of sodium potassium                             | 3519.1787 |
| 6874 | X86400_at-2_NA_illumina        | ATPase, Na <sup>+</sup> /K <sup>+</sup> transporting, gamma 1 | 3519.1787 |
| 6875 | M33653_at_GI_22027608-A        | COL4A2 Collagen, type IV, alpha 2                             | 3519.2166 |
| 6876 | M26062_at_GI_23238195-S        | IL2RB Interleukin 2 receptor beta chain                       | 3519.2188 |
| 6877 | RC_AA156450_at_GI_40217610-S   | EST: zl51f03.s1 Soares pregnant uterus                        | 3519.2546 |
| 6878 | X65663_at_GI_15277412-S        | Sox-6 mRNA                                                    | 3519.2593 |
| 6879 | U68030_at_GI_37187859-A        | G protein-coupled receptor (STRL22)                           | 3519.2776 |
| 6880 | H78886_at_NA_illumina          | EST: yu11a03.r1 Homo sapiens cDNA                             | 3519.2786 |
| 6881 | R86180_at_NA_illumina          | EST: yp88g01.r1 Homo sapiens cDNA                             | 3519.282  |
| 6882 | RC_AA116054_at_NA_illumina     | EST: zm79e10.s1 Stratagene                                    | 3519.2822 |
| 6883 | AA291449_at_GI_34147684-S      | EST: zt44e09.r1 Soares ovary tumor                            | 3519.2847 |
| 6884 | RC_AA443601_at_GI_4506734-S    | Ribosomal protein S6 kinase, 90kD,                            | 3519.3032 |
| 6885 | RC_AA256157_at_NA_illumina     | EST: zr79b01.s1 Soares NhHMPu S1                              | 3519.304  |
| 6886 | HG4679-HT5104_at_NA_illumina   | Oncogene Ret/Ptc, Fusion Activated                            | 3519.3062 |
| 6887 | RC_AA405435_at_GI_23397491-S   | EST: zu13h11.s1 Soares testis NHT Homo                        | 3519.33   |
| 6888 | HG371-HT26388_at_NA_illumina   | Mucin 1, Epithelial, Alt. Splice 9                            | 3519.3325 |
| 6889 | M63896_at_GI_38570152-S        | Transcriptional enhancer factor (TEF1)                        | 3519.3337 |
| 6890 | S75174_at_GI_44829053-S        | E2F4 E2F transcription factor 4, p107/p130                    | 3519.3455 |
| 6891 | RC_AA435648_at_GI_29826328-A   | Human DNA sequence from clone 1119D9                          | 3519.3486 |
| 6892 | M14758_at_GI_42741658-S        | MULTIDRUG RESISTANCE PROTEIN 1                                | 3519.3564 |
| 6893 | U77456_at_GI_21327711-S        | Nucleosome assembly protein 2 mRNA                            | 3519.3706 |
| 6894 | H22598_at_NA_illumina          | Peptidylprolyl isomerase D (cyclophilin D)                    | 3519.3706 |
| 6895 | HG2139-HT2208_f_at_NA_illumina | Beta-1-Glycoprotein 1, Pregnancy-Specific                     | 3519.391  |
| 6896 | M28214_at_GI_19923749-S        | GTP-binding protein (RAB3B) mRNA                              | 3519.401  |
| 6897 | W27247_at_NA_illumina          | EST: 24d12 Human retina cDNA randomly                         | 3519.433  |
| 6898 | RC_D11961_at_GI_37577182-A     | EST: Human HepG2 3'-directed Mbol                             | 3519.4539 |
| 6899 | HG825-HT825_at_NA_illumina     | Guanine Nucleotide-Binding Protein, Alpha                     | 3519.4717 |
| 6900 | X15954_rna1_s_at_NA_illumina   | MBP1 gene, exon 1 (and joined CDS)                            | 3519.491  |
| 6901 | U18088_s_at_NA_illumina        | 3',5'-cyclic AMP phosphodiesterase                            | 3519.52   |
| 6902 | HG142-HT142_at_NA_illumina     | Modulator Recognition Factor 2                                | 3519.5312 |
| 6903 | M14123_xpt4_at_NA_illumina     | Neutral protease large subunit from                           | 3519.546  |
| 6904 | U86358_at_GI_22538797-A        | Chemokine (TECK) mRNA                                         | 3519.5547 |
| 6905 | U18985_at_GI_5174724-S         | Triadin mRNA                                                  | 3519.574  |
| 6906 | N29207_at_NA_illumina          | EST: yx42h05.r1 Homo sapiens cDNA                             | 3519.5803 |
| 6907 | HG1751-HT1768_s_at_NA_illumina | Chorionic Somatomammotropin Hormone                           | 3519.6104 |
| 6908 | X87870_at_GI_31077208-A        | HEPATOCYTE NUCLEAR FACTOR 4                                   | 3519.6326 |
| 6909 | AA234651_at_GI_29171732-S      | EST: zr75f06.r1 Soares NhHMPu S1                              | 3519.6345 |
| 6910 | Z19899_at_NA_illumina          | EST: H. sapiens putatively transcribed                        | 3519.6448 |
| 6911 | AB002314_at_NA_illumina        | KIAA0316 gene                                                 | 3519.6548 |

|      |                                |                                                    |           |
|------|--------------------------------|----------------------------------------------------|-----------|
| 6912 | AB002314_at-2_NA_illumina      | KIAA0316 gene product                              | 3519.6548 |
| 6913 | RC_AA477106_s_at_GI_41352715-  | D21S2056E, novel nuclear protein 1                 | 3519.6758 |
| 6914 | U62966_at_GI_42542382-I        | Na <sup>+</sup> /nucleoside cotransporter (hCNT1c) | 3519.6868 |
| 6915 | U62966_at-2_NA_illumina        | Solute carrier family 28 (sodium-coupled           | 3519.6868 |
| 6916 | X70083_at_GI_4557596-S         | ABP-280-like mRNA for filamin (695 bps)            | 3519.742  |
| 6917 | V00535_rna1_s_at_NA_illumina   | Interferon, beta 1, fibroblast                     | 3519.7556 |
| 6918 | RC_AA477739_at_GI_40788019-S   | EST: zu34a07.s1 Soares ovary tumor                 | 3519.8052 |
| 6919 | HG2564-HT2660_s_at_NA_illumina | Gamma-Aminobutyric Acid (Gaba) A                   | 3519.8289 |
| 6920 | X58234_at_GI_33636718-S        | Anti-lectin antibody epitope (clone p36/8-5)       | 3519.8545 |
| 6921 | L41816_at_GI_21536281-S        | Cam kinase I mRNA                                  | 3519.8635 |
| 6922 | AA481309_at_NA_illumina        | EST: zv06a06.r1 Soares NhHMPu S1                   | 3519.8647 |
| 6923 | RC_AA205437_at_GI_13384599-S   | EST: zq66b06.s1 Stratagene                         | 3519.893  |
| 6924 | RC_AA035284_at_NA_illumina     | EST: zk25b02.s1 Soares pregnant uterus             | 3519.9192 |
| 6925 | RC_AA480907_at_NA_illumina     | EST: aa28f08.s1 NCI_CGAP_GCB1 Homo                 | 3519.9355 |
| 6926 | X13589_at_NA_illumina          | CYP19 Cytochrome P450, subfamily XIX               | 3519.9575 |
| 6927 | U47011_cds3_s_at_NA_illumina   | Fibroblast growth factor 8 (androgen-              | 3519.9744 |
| 6928 | AC000066_at_GI_22538388-A      | BAC clone RG293F11 from 7q21-7q22,                 | 3519.981  |
| 6929 | M28210_at_GI_34147654-S        | GTP-binding protein (RAB3A) mRNA                   | 3520.0022 |
| 6930 | AA099726_at_NA_illumina        | EST: zk86e10.r1 Soares pregnant uterus             | 3520.0266 |
| 6931 | L11695_at_GI_4759225-S         | SERINE/THREONINE-PROTEIN KINASE                    | 3520.0288 |
| 6932 | RC_AA052959_at_NA_illumina     | EST: zi70b07.s1 Stratagene colon                   | 3520.043  |
| 6933 | S69231_s_at_NA_illumina        | DCT Dopachrome tautomerase                         | 3520.0544 |
| 6934 | U47011_cds1_at_GI_15147349-A   | FGF8 gene (fibroblast growth factor 8              | 3520.0886 |
| 6935 | AA011452_at_NA_illumina        | EST: zi01e06.r1 Soares fetal liver spleen          | 3520.1318 |
| 6936 | Z21707_at_NA_illumina          | P18 mRNA                                           | 3520.144  |
| 6937 | L40933_at-2_NA_illumina        | Homo sapiens phosphoglucomutase-                   | 3520.148  |
| 6938 | L40933_at_GI_39725936-S        | Phosphoglucomutase-related protein                 | 3520.148  |
| 6939 | U64198_at_GI_24497441-S        | Il-12 receptor beta2 mRNA                          | 3520.1577 |
| 6940 | RC_AA191647_at_GI_28416957-S   | Ceruloplasmin (ferroxidase)                        | 3520.1934 |
| 6941 | Z35309_at_GI_4557256-S         | ADCY8 Adenylate cyclase 8 (brain)                  | 3520.2073 |
| 6942 | J00209_f_at_GI_4504588-S       | IFNA10 Interferon, alpha 10                        | 3520.2158 |
| 6943 | M91392_at_NA_illumina          | EST: HUMRTPGEM Homo sapiens cDNA.                  | 3520.2915 |
| 6944 | S77094_at_GI_4557456-S         | Muscle acetylcholine receptor alpha-               | 3520.328  |
| 6945 | D10922_s_at_GI_4503780-S       | FPRL2 Formyl peptide receptor-like 2               | 3520.332  |
| 6946 | D10922_s_at-2_NA_illumina      | Formyl peptide receptor-like 1                     | 3520.332  |
| 6947 | AA434506_at_NA_illumina        | EST: zw31c06.r1 Soares ovary tumor                 | 3520.338  |
| 6948 | AB000816_s_at_GI_42716310-S    | BMAL1d, partial cds                                | 3520.3667 |
| 6949 | W40374_at_NA_illumina          | DiGeorge syndrome critical region gene 2           | 3520.372  |
| 6950 | RC_AA449745_at_NA_illumina     | EST: zx07e03.s1 Soares total fetus                 | 3520.3823 |
| 6951 | V00532_rna1_f_at_GI_10880984-S | IFNA gene (interferon alpha-i) extracted           | 3520.3857 |
| 6952 | AA426361_at_GI_17149833-S      | Sortilin 1                                         | 3520.4297 |
| 6953 | U33880_at_GI_19743818-A        | Beta 1 integrin isoform D (ITGB1) gene,            | 3520.4333 |
| 6954 | AA449637_at_NA_illumina        | EST: zx08f09.r1 Soares total fetus                 | 3520.458  |

|      |                              |                                              |           |
|------|------------------------------|----------------------------------------------|-----------|
| 6955 | X77777_s_at_GI_15619005-S    | VASOACTIVE INTESTINAL                        | 3520.5488 |
| 6956 | X76342_at_GI_11496969-S      | ADH7 Alcohol dehydrogenase 7 sigma           | 3520.559  |
| 6957 | AA393106_at_NA_illumina      | V-jun avian sarcoma virus 17 oncogene        | 3520.5889 |
| 6958 | Y10210_at_NA_illumina        | CD22 protein                                 | 3520.599  |
| 6959 | U17032_at_GI_4502220-S       | P190-B (p190-B) mRNA                         | 3520.6008 |
| 6960 | AA251636_at_GI_42657830-S    | EST: zs10b09.r1 NCI_CGAP_GCB1 Homo           | 3520.6064 |
| 6961 | HG2171-HT2241_at_NA_illumina | 12-Lipoxygenase                              | 3520.6738 |
| 6962 | X51985_at_GI_15718681-S      | LAG3 Lymphocyte-activation gene 3            | 3520.6797 |
| 6963 | AA481200_s_at_NA_illumina    | EST: aa34c11.r1 NCI_CGAP_GCB1 Homo           | 3520.686  |
| 6964 | U63289_at_GI_38570082-A      | RNA-binding protein CUG-BP/hNab50            | 3520.6902 |
| 6965 | RC_D25680_at_NA_illumina     | EST: Human colon 3'directed Mbol cDNA,       | 3520.7    |
| 6966 | RC_AA176867_at_GI_34222384-S | EST: zp11f06.s1 Stratagene fetal retina      | 3520.714  |
| 6967 | RC_AA234371_at_GI_7705283-S  | EST: zr72f12.s1 Soares NhHMPu S1             | 3520.7224 |
| 6968 | AA085138_at_NA_illumina      | Zn01a07.r1 Stratagene colon HT29             | 3520.7239 |
| 6969 | AA402541_at_GI_37595559-S    | EST: zu48h08.r1 Soares ovary tumor           | 3520.7812 |
| 6970 | RC_AA351261_s_at_NA_illumina | EST: EST59044 Infant brain Homo              | 3520.7834 |
| 6971 | S62027_s_at_NA_illumina      | Transducin gamma subunit [human,             | 3520.7905 |
| 6972 | RC_AA262783_at_NA_illumina   | EST: zs24f09.s1 NCI_CGAP_GCB1 Homo           | 3520.791  |
| 6973 | RC_AA035366_at_NA_illumina   | EST: zk26d12.s1 Soares pregnant uterus       | 3520.7964 |
| 6974 | U96922_at_GI_4504706-S       | Inositol polyphosphate 4-phosphatase type    | 3520.8289 |
| 6975 | RC_AA284829_at_GI_24307936-S | H.sapiens mRNA for Zinc-finger protein       | 3520.8628 |
| 6976 | RC_AA465171_at_GI_8922572-S  | EST: aa33d09.s1 NCI_CGAP_GCB1                | 3520.8728 |
| 6977 | RC_AA419026_at_GI_24308072-S | EST: zv34e11.s1 Soares ovary tumor           | 3520.8909 |
| 6978 | U79549_rna1_s_at_NA_illumina | Human Xp22 BAC CT-285115 (from               | 3520.9058 |
| 6979 | AA233236_at_NA_illumina      | Human clone p4betaGT/3 beta-1,4-             | 3520.9238 |
| 6980 | X95425_s_at_NA_illumina      | EHK-1 receptor tyrosine kinase               | 3520.9412 |
| 6981 | AA422168_at_GI_27262625-A    | EST: zv31c05.r1 Soares ovary tumor           | 3520.948  |
| 6982 | AA203111_at_NA_illumina      | Human ets domain protein ERF mRNA,           | 3520.95   |
| 6983 | W28734_at_GI_17978476-S      | EST: 51a1 Human retina cDNA randomly         | 3520.9697 |
| 6984 | H19348_at_NA_illumina        | EST: ym46a01.r1 Homo sapiens cDNA            | 3521.0037 |
| 6985 | M96789_at_GI_4504002-S       | GJA4 Gap junction protein, alpha 4, 37kD     | 3521.0403 |
| 6986 | RC_AA421268_at_NA_illumina   | Homo sapiens putative tumor suppressor       | 3521.0579 |
| 6987 | RC_AA450294_s_at_NA_illumina | EST: zx43g04.s1 Soares total fetus           | 3521.061  |
| 6988 | U70212_at_GI_21614541-S      | Single-minded (Drosophila) homolog 1         | 3521.062  |
| 6989 | Z96810_at_GI_6005714-S       | DNA sequence from PAC 452H17 on              | 3521.086  |
| 6990 | U31216_s_at_NA_illumina      | Metabotropic glutamate receptor 1 beta       | 3521.1006 |
| 6991 | AA418171_at_GI_40217625-S    | EST: zv94f02.r1 Soares NhHMPu S1             | 3521.1094 |
| 6992 | W31097_at_NA_illumina        | Homo sapiens COX4AL mRNA, complete           | 3521.1382 |
| 6993 | AA292466_at_GI_21536298-S    | Claudin 3                                    | 3521.142  |
| 6994 | R48108_at_GI_32484976-S      | EST: yj63f04.r1 Homo sapiens cDNA clone      | 3521.144  |
| 6995 | S83365_at_NA_illumina        | Putative Rab5-interacting protein {clone L1- | 3521.1665 |
| 6996 | U24685_at_NA_illumina        | Anti-B cell autoantibody IgM heavy chain     | 3521.1875 |
| 6997 | T83444_at_GI_24797105-S      | Homo sapiens mRNA for KIAA0887               | 3521.212  |

|      |                              |                                              |           |
|------|------------------------------|----------------------------------------------|-----------|
| 6998 | RC_AA406312_at_NA_illumina   | EST: zv24d01.s1 Soares NhHMPu S1             | 3521.2183 |
| 6999 | RC_D20426_at_NA_illumina     | EST: Human HL60 3'directed Mbol cDNA,        | 3521.2346 |
| 7000 | L10403_at_NA_illumina        | DNA binding protein for surfactant protein   | 3521.243  |
| 7001 | T55509_at_NA_illumina        | EST: yb38d10.r1 Homo sapiens cDNA            | 3521.245  |
| 7002 | RC_D20298_at_NA_illumina     | EST: Human HL60 3'directed Mbol cDNA,        | 3521.2534 |
| 7003 | U82987_at_GI_24475588-S      | Bcl-2 binding component 3 (bbc3) mRNA,       | 3521.2659 |
| 7004 | U82987_at-2_NA_illumina      | Human Bcl-2 binding component 3 (bbc3)       | 3521.2659 |
| 7005 | RC_AA024782_at_GI_7657121-S  | EST: ze76h11.s1 Soares fetal heart           | 3521.2795 |
| 7006 | M91463_rna1_at-2_NA_illumina | Solute carrier family 2 (facilitated glucose | 3521.2954 |
| 7007 | M91463_rna1_at_NA_illumina   | Glucose transporter (GLUT4) gene             | 3521.2954 |
| 7008 | R17476_at_GI_37543748-S      | EST: yg14g04.r1 Homo sapiens cDNA            | 3521.321  |
| 7009 | Y12556_at_GI_38016923-S      | AMP-activated protein kinase beta-1          | 3521.3257 |
| 7010 | AA402288_at_NA_illumina      | Zu46b07.r1 Soares ovary tumor NbHOT          | 3521.3364 |
| 7011 | RC_D20248_at_NA_illumina     | EST: Human HL60 3'directed Mbol cDNA,        | 3521.3755 |
| 7012 | HG3985-HT4255_at_NA_illumina | Cpg-Enriched Dna, Clone E04                  | 3521.3872 |
| 7013 | RC_AA164519_at_NA_illumina   | EST: zo97b09.s1 Stratagene ovarian           | 3521.4087 |
| 7014 | AB002338_at_GI_24307976-S    | Human mRNA for KIAA0340 gene, partial        | 3521.4458 |
| 7015 | X51602_at_NA_illumina        | VASCULAR ENDOTHELIAL GROWTH                  | 3521.4475 |
| 7016 | M90820_at_GI_17149845-S      | FKBP3 FK506-binding protein 3 (25kD)         | 3521.4626 |
| 7017 | AA292745_at_GI_27436898-S    | EST: zt55h02.r1 Soares ovary tumor           | 3521.464  |
| 7018 | AA489299_at_GI_19743895-A    | Homo sapiens ADA3-like protein mRNA,         | 3521.485  |
| 7019 | U22680_at_NA_illumina        | X2 box repressor mRNA                        | 3521.4963 |
| 7020 | V00571_rna1_at_GI_4503040-S  | Gene encoding prepro form of corticotropin   | 3521.5054 |
| 7021 | U03187_at_GI_24497439-A      | IL12 receptor component mRNA                 | 3521.5183 |
| 7022 | RC_AA151243_at_GI_41349503-S | EST: zl40f11.s1 Soares pregnant uterus       | 3521.5383 |
| 7023 | M20777_at_GI_17402876-A      | , alpha-2 (VI) collagen                      | 3521.5388 |
| 7024 | R22178_at_NA_illumina        | Homo sapiens CAGF28 mRNA, partial cds        | 3521.5518 |
| 7025 | Y07846_at_GI_23065525-A      | EWS, gar22, rrp22 and bam22 genes            | 3521.5679 |
| 7026 | U25826_at_GI_6005891-S       | Transcription factor (SC1) gene              | 3521.5696 |
| 7027 | W39573_at_NA_illumina        | EST: zc20b05.r1 Soares senescent             | 3521.574  |
| 7028 | X77383_at_GI_38327639-S      | CATHEPSIN O PRECURSOR                        | 3521.5884 |
| 7029 | Z23091_rna1_at_NA_illumina   | GPV gene encoding platelet glycoprotein V    | 3521.5894 |
| 7030 | W26980_at_NA_illumina        | Homo sapiens mRNA for putative ABC           | 3521.611  |
| 7031 | M92269_f_at_NA_illumina      | L-type calcium channel HFCC mRNA             | 3521.6125 |
| 7032 | U82279_at_GI_19923781-S      | Immunoglobulin-like transcript 2 mRNA        | 3521.624  |
| 7033 | AA203586_s_at_GI_11386184-S  | Homo sapiens mRNA for atopy related          | 3521.647  |
| 7034 | AF001620_at_GI_4557778-S     | Trabecular meshwork inducible                | 3521.6514 |
| 7035 | M89955_at_GI_39725667-S      | 5-HT1D-type serotonin receptor gene          | 3521.6748 |
| 7036 | X58288_at_GI_18860903-S      | PTPRM Protein tyrosine phosphatase,          | 3521.676  |
| 7037 | AA351461_at_NA_illumina      | EST: EST59216 Infant brain Homo              | 3521.6782 |
| 7038 | U66580_at_GI_4885306-S       | Putative G protein-coupled receptor          | 3521.6792 |
| 7039 | AA478129_at_NA_illumina      | EST: zu42c09.r1 Soares ovary tumor           | 3521.6833 |
| 7040 | X91148_at_NA_illumina        | MTP Microsomal triglyceride transfer         | 3521.6917 |

|      |                               |                                            |           |
|------|-------------------------------|--------------------------------------------|-----------|
| 7041 | X83703_at_GI_38327521-S       | Cytokine inducible nuclear protein         | 3521.6956 |
| 7042 | X83703_at-2_NA_illumina       | H.sapiens mRNA for cytokine inducible      | 3521.6956 |
| 7043 | RC_D59368_at_GI_41208836-S    | EST: Human fetal brain cDNA 3'-end GEN-    | 3521.696  |
| 7044 | AJ001047_at_GI_13518040-S     | Matrilin-3                                 | 3521.7012 |
| 7045 | RC_AA488979_at_GI_34222264-S  | Homo sapiens cell cycle-regulated factor   | 3521.7139 |
| 7046 | U83601_at_NA_illumina         | Calpastatin gene, exons 14 and 15, partial | 3521.7195 |
| 7047 | X90846_s_at_NA_illumina       | MST1 Macrophage stimulating 1              | 3521.7195 |
| 7048 | RC_AA235834_s_at_GI_32189414- | EST: zs41a10.s1 Soares NhHMPu S1           | 3521.7288 |
| 7049 | U96191_at_NA_illumina         | Trophoblast hypoxia-regulated factor-5     | 3521.7305 |
| 7050 | U22322_s_at_GI_31657133-S     | FRK Fyn-related kinase                     | 3521.743  |
| 7051 | M96738_s_at_GI_44890055-S     | Somatostatin receptor subtype 3 (SSTR3)    | 3521.7488 |
| 7052 | H96943_at_GI_42734384-S       | EST: yu01e08.r1 Homo sapiens cDNA          | 3521.754  |
| 7053 | RC_AA287064_at_NA_illumina    | EST: zs58d04.s1 NCI_CGAP_GCB1              | 3521.755  |
| 7054 | U89717_at_GI_4506462-S        | RDH1 Retinol dehydrogenase 1 (11-cis)      | 3521.7563 |
| 7055 | RC_AA262648_at_GI_32307139-A  | EST: zs23f12.s1 NCI_CGAP_GCB1 Homo         | 3521.7646 |
| 7056 | U87269_at_GI_10938012-S       | P120E4F transcription factor mRNA          | 3521.7678 |
| 7057 | M14306_at_GI_14251217-S       | Beta-A3/A1 crystallin (CYRBA3/A1)          | 3521.803  |
| 7058 | RC_AA428368_at_NA_illumina    | EST: zw51f07.s1 Soares total fetus         | 3521.835  |
| 7059 | HG4518-HT4921_at_NA_illumina  | Transcription Factor Btf3 Homolog          | 3521.8608 |
| 7060 | U41163_s_at_NA_illumina       | Creatine transporter (SLC6A10) gene,       | 3521.8623 |
| 7061 | RC_AA398306_at_GI_37541267-S  | EST: zt61c04.s1 Soares testis NHT Homo     | 3521.8662 |
| 7062 | HG3477-HT3670_at_NA_illumina  | Cd4 Antigen                                | 3521.8875 |
| 7063 | X78712_at_GI_41393574-S       | GKP2 Glycerol kinase 2 (testis specific)   | 3521.9072 |
| 7064 | M67439_at_GI_34328907-S       | D(1B) DOPAMINE RECEPTOR                    | 3521.908  |
| 7065 | U60319_at_GI_21040356-A       | HLA-H MHC protein HLA-H (hereditary        | 3521.9236 |
| 7066 | J05200_s_at_NA_illumina       | Ryanodine receptor 1 (skeletal)            | 3521.9355 |
| 7067 | T92512_at_NA_illumina         | Ye24g11.r1 Homo sapiens cDNA clone         | 3521.9375 |
| 7068 | Y09561_at_GI_34335274-A       | P2X7 receptor                              | 3521.9436 |
| 7069 | RC_D19756_at_NA_illumina      | EST: Human HL60 3'directed Mbol cDNA,      | 3521.9497 |
| 7070 | M80478_at_GI_4504076-S        | GP9 Platelet glycoprotein IX               | 3521.962  |
| 7071 | H09058_at_GI_34577117-S       | EST: yl96f11.r1 Homo sapiens cDNA clone    | 3521.976  |
| 7072 | L22206_at_GI_4895106-S        | AVPR2 Antidiuretic hormone receptor        | 3521.9814 |
| 7073 | S64699_at_NA_illumina         | Cystic fibrosis transmembrane              | 3522.0012 |
| 7074 | L04791_s_at_GI_4557564-S      | Excision repair cross-complementing        | 3522.0068 |
| 7075 | HG2271-HT2367_at_NA_illumina  | Profilaggrin                               | 3522.0186 |
| 7076 | RC_D60394_at_NA_illumina      | EST: Human fetal brain cDNA 3'-end GEN-    | 3522.037  |
| 7077 | D16827_s_at_GI_4557864-S      | Fifth somatostatin receptor subtype        | 3522.059  |
| 7078 | L04569_at_GI_27597079-S       | Calcium channel L-type alpha 1 subunit     | 3522.083  |
| 7079 | X58401_at_NA_illumina         | CLL-12 transcript of unrearranged          | 3522.1777 |
| 7080 | D87012_at_GI_34335290-S       | Immunoglobulin lambda gene locus DNA,      | 3522.2192 |
| 7081 | U80987_s_at_GI_18201895-A     | Transcription factor TBX5 mRNA             | 3522.2368 |
| 7082 | RC_AA001886_at_GI_34222253-A  | EST: zh81d12.s1 Soares fetal liver spleen  | 3522.2368 |
| 7083 | L28175_at_GI_38505196-S       | PTGER2 Prostaglandin E receptor 2          | 3522.2412 |

|      |                               |                                            |           |
|------|-------------------------------|--------------------------------------------|-----------|
| 7084 | AA376468_at_NA_illumina       | EST: EST88890 HSC172 cells II Homo         | 3522.247  |
| 7085 | RC_AA598745_at_NA_illumina    | EST: ae49h06.s1 Stratagene lung            | 3522.2493 |
| 7086 | M19989_cds1_at_NA_illumina    | Platelet-derived growth factor (PDGFA) A   | 3522.2812 |
| 7087 | AA479990_at_GI_13375645-S     | EST: zv18a05.r1 Soares NhHMPu S1           | 3522.293  |
| 7088 | X89986_s_at_GI_21536418-S     | NBK apoptotic inducer protein              | 3522.304  |
| 7089 | W30895_at_NA_illumina         | EST: zb78e12.r1 Soares senescent           | 3522.3606 |
| 7090 | AA017283_at_NA_illumina       | EST: ze52b01.r1 Soares retina N2b4HR       | 3522.4346 |
| 7091 | AA215997_s_at_GI_32967306-A   | EST: hp0213.seq.F Fetal heart, Lambda      | 3522.4756 |
| 7092 | M26657_s_at_GI_23238215-A     | DCP1 Dipeptidyl carboxypeptidase 1         | 3522.4778 |
| 7093 | AA034438_at_NA_illumina       | EST: ze75f03.r1 Soares fetal heart         | 3522.4783 |
| 7094 | S74720_at_GI_5016089-S        | DAX-1                                      | 3522.4846 |
| 7095 | X73501_at_GI_27894336-S       | KERATIN, TYPE I CYTOSKELETAL 20            | 3522.5068 |
| 7096 | X73501_at-2_NA_illumina       | KERATIN, TYPE I CYTOSKELETAL 20            | 3522.5068 |
| 7097 | D88460_at_GI_33946268-S       | N-WASP                                     | 3522.524  |
| 7098 | Y00317_at_GI_10863940-S       | UDP-GLUCURONOSYLTRANSFERASE                | 3522.5405 |
| 7099 | Y00317_at-2_NA_illumina       | UDP-GLUCURONOSYLTRANSFERASE                | 3522.5405 |
| 7100 | AA452428_at_NA_illumina       | EST: zx15g01.r1 Soares total fetus         | 3522.5496 |
| 7101 | RC_AA278373_at_NA_illumina    | Homo sapiens mRNA for KIAA0746             | 3522.5527 |
| 7102 | AA422029_at_NA_illumina       | EST: zv26g08.r1 Soares NhHMPu S1           | 3522.5784 |
| 7103 | M17446_s_at_NA_illumina       | FGF4 Fibroblast growth factor 4 (heparin   | 3522.5867 |
| 7104 | AA287308_at_NA_illumina       | EST: zs52f04.r1 NCI_CGAP_GCB1 Homo         | 3522.6003 |
| 7105 | X99897_s_at_NA_illumina       | P/Q-type calcium channel alpha1 subunit    | 3522.606  |
| 7106 | AFFX-CreX-3_st-2_NA_illumina  | AFFX-CreX-3_st (miscellaneous control -    | 3522.6548 |
| 7107 | AFFX-CreX-3_st_NA_illumina    | AFFX-CreX-3_st (endogenous control)        | 3522.6548 |
| 7108 | R86920_at_NA_illumina         | EST: yq30g06.r1 Homo sapiens cDNA          | 3522.6584 |
| 7109 | RC_AA458841_at_NA_illumina    | EST: aa26b09.s1 NCI_CGAP_GCB1              | 3522.6863 |
| 7110 | AA094120_at_GI_19923448-S     | EST: cl1888.seq.F Fetal heart, Lambda      | 3522.71   |
| 7111 | RC_AA430466_at_NA_illumina    | EST: zw23d05.s1 Soares ovary tumor         | 3522.8862 |
| 7112 | RC_AA406354_at_GI_7705942-A   | EST: zv10b02.s1 Soares NhHMPu S1           | 3522.8923 |
| 7113 | RC_AA406320_at_NA_illumina    | EST: zv24f04.s1 Soares NhHMPu S1           | 3522.9177 |
| 7114 | AA417181_at_NA_illumina       | EST: zu13d09.r1 Soares testis NHT Homo     | 3523.0188 |
| 7115 | AD000092_cds2_at_GI_4503348-S | Hypothetical human protein R31240_2        | 3523.0225 |
| 7116 | J00116_s_at_GI_15149478-A     | COL2A1 Collagen, type II, alpha 1 (primary | 3523.0266 |
| 7117 | Z11695_at_GI_20986530-A       | RPLP1 Ribosomal protein, large, P1         | 3523.0308 |
| 7118 | X60955_s_at_NA_illumina       | TYRP1 Tyrosinase-related protein 1         | 3523.0378 |
| 7119 | R79275_at_NA_illumina         | EST: yi84d04.r1 Homo sapiens cDNA          | 3523.0386 |
| 7120 | AFFX-CreX-5_at_NA_illumina    | AFFX-CreX-5_at (endogenous control)        | 3523.0413 |
| 7121 | AFFX-CreX-5_at-2_NA_illumina  | AFFX-CreX-5_at (miscellaneous control -    | 3523.0413 |
| 7122 | D70830_at_GI_6005996-S        | Doc2 beta                                  | 3523.0544 |
| 7123 | AA091231_at_GI_26051236-S     | EST: cchn2158.seq.F Fetal heart, Lambda    | 3523.0596 |
| 7124 | W23913_at_NA_illumina         | EST: zb47b02.r1 Soares fetal lung          | 3523.063  |
| 7125 | X95463_s_at_NA_illumina       | FMR2 Fragile X mental retardation 2        | 3523.0718 |
| 7126 | L22569_at_GI_22538429-A       | CTSB Cathepsin B                           | 3523.0771 |

|      |                                |                                            |           |
|------|--------------------------------|--------------------------------------------|-----------|
| 7127 | R81267_at_NA_illumina          | Yj01a05.r1 Homo sapiens cDNA clone         | 3523.1182 |
| 7128 | AA249611_at_NA_illumina        | SH3-binding domain glutamic acid-rich      | 3523.1533 |
| 7129 | U90543_at_GI_17975773-A        | Butyrophilin (BTF1) mRNA                   | 3523.1912 |
| 7130 | S60415_at_GI_45359830-A        | Myasthenic syndrome antigen B [human,      | 3523.218  |
| 7131 | S79854_at-2_NA_illumina        | Deiodinase, iodothyronine, type III        | 3523.2708 |
| 7132 | S79854_at_GI_4503334-S         | Type 3 iodothyronine deiodinase            | 3523.2708 |
| 7133 | AFFX-BioC-3_st-2_NA_illumina   | AFFX-BioC-3_st (miscellaneous control -    | 3523.313  |
| 7134 | AFFX-BioC-3_st_NA_illumina     | AFFX-BioC-3_st (endogenous control)        | 3523.313  |
| 7135 | H41895_at_NA_illumina          | EST: yo07h11.r1 Homo sapiens cDNA          | 3523.3647 |
| 7136 | RC_AA449435_at_GI_21553330-S   | EST: zx05c11.s1 Soares total fetus         | 3523.3745 |
| 7137 | U73330_at_NA_illumina          | PAC clone 85D2 from 13q12-13q13,           | 3523.449  |
| 7138 | RC_AA478967_at_NA_illumina     | EST: zv18e03.s1 Soares NhHMPu S1           | 3523.4622 |
| 7139 | HG4340-HT4610_at_NA_illumina   | Soxa                                       | 3523.5227 |
| 7140 | X76383_at_GI_25777668-S        | HE3(alpha)                                 | 3523.545  |
| 7141 | AC000062_at_GI_12957487-S      | PAC clone 2G3A from 13q12-13q13,           | 3523.598  |
| 7142 | W26567_at_GI_21704282-S        | EST: 33b11 Human retina cDNA randomly      | 3523.6382 |
| 7143 | U20816_s_at_NA_illumina        | Nuclear factor kappa-B2 (NF-KB2) gene,     | 3523.6423 |
| 7144 | S62028_s_at_GI_4506458-S       | RCV1 Recoverin                             | 3523.6877 |
| 7145 | R39374_at_GI_24308156-S        | EST: yh95a06.r1 Homo sapiens cDNA          | 3523.7332 |
| 7146 | N24988_at_NA_illumina          | EST: yx16d12.r1 Homo sapiens cDNA          | 3523.7559 |
| 7147 | W26719_at_NA_illumina          | EST: 12f7 Human retina cDNA randomly       | 3523.7822 |
| 7148 | Z29074_at_GI_4557704-S         | KRT9 Keratin 9                             | 3523.817  |
| 7149 | AC002086_at_NA_illumina        | PAC clone DJ525N14 from Xq23,              | 3523.82   |
| 7150 | U18235_at_GI_45446739-S        | ATP-binding cassette protein (ABC2)        | 3523.8423 |
| 7151 | M57892_at_GI_4557396-S         | CA6 Carbonic anhydrase VI                  | 3523.882  |
| 7152 | HG2841-HT2969_s_at_NA_illumina | Albumin, Alt. Splice 3, Missplicing In     | 3523.894  |
| 7153 | X00038_at_NA_illumina          | H4 histone gene                            | 3523.9023 |
| 7154 | T34126_s_at_GI_27436874-S      | EST: EST62996 Homo sapiens cDNA 5'         | 3523.9087 |
| 7155 | U58522_at_GI_21536483-S        | Huntingtin interacting protein (HIP2) mRNA | 3523.936  |
| 7156 | U58522_at-2_NA_illumina        | Huntingtin-interacting protein 2           | 3523.936  |
| 7157 | RC_AA398290_at_NA_illumina     | EST: zt60f12.s1 Soares testis NHT Homo     | 3524.008  |
| 7158 | D88667_at_NA_illumina          | Cerebroside sulfotransferase               | 3524.024  |
| 7159 | H47161_at_NA_illumina          | Acyl-Coenzyme A dehydrogenase,             | 3524.1067 |
| 7160 | RC_AA459949_at_GI_31982893-S   | EST: zx66b02.s1 Soares total fetus         | 3524.1423 |
| 7161 | AA053831_at_NA_illumina        | Dual-specificity tyrosine-(Y)-             | 3524.1516 |
| 7162 | W03018_at_NA_illumina          | Glucocorticoid receptor DNA binding factor | 3524.1821 |
| 7163 | U52840_at_GI_4506880-S         | Cri-du-chat region mRNA, clone CSA1        | 3524.2424 |
| 7164 | W77823_at_NA_illumina          | Homo sapiens clone 23767 and 23782         | 3524.2449 |
| 7165 | H81241_at_GI_28376642-S        | EST: yu73c07.r1 Homo sapiens cDNA          | 3524.2688 |
| 7166 | RC_AA451854_at_NA_illumina     | EST: zx12g01.s1 Soares total fetus         | 3524.367  |
| 7167 | M96684_at_GI_16753217-S        | Pur (pur-alpha) mRNA                       | 3524.3796 |
| 7168 | U44105_at_NA_illumina          | Rab9 expressed pseudogene mRNA             | 3524.4307 |
| 7169 | U26209_at_GI_4506978-S         | Solute carrier family 13 (sodium-          | 3524.4438 |

|      |                                |                                             |           |
|------|--------------------------------|---------------------------------------------|-----------|
| 7170 | Z11502_at_GI_4757753-S         | ANNEXIN XIII                                | 3524.5034 |
| 7171 | AA338308_at_GI_14149666-S      | Homo sapiens mRNA for KIAA0524              | 3524.547  |
| 7172 | J04621_at_GI_27804306-S        | SDC2 Syndecan 2 (heparan sulfate            | 3524.559  |
| 7173 | H49097_at_NA_illumina          | EST: yo21a07.r1 Homo sapiens cDNA           | 3524.6162 |
| 7174 | T23709_at_NA_illumina          | Seq545 Homo sapiens cDNA clone              | 3524.6714 |
| 7175 | T57140_s_at_NA_illumina        | Paraoxonase 3                               | 3524.6978 |
| 7176 | D87468_at-2_NA_illumina        | Human mRNA for KIAA0278 gene, partial       | 3524.8276 |
| 7177 | D87468_at_GI_24431967-S        | KIAA0278 gene, partial cds                  | 3524.8276 |
| 7178 | D59253_at_GI_19923386-S        | NCBP interacting protein 1                  | 3524.969  |
| 7179 | D59253_at-2_NA_illumina        | H.sapiens mRNA for CBP20                    | 3524.969  |
| 7180 | D82474_at_GI_13489072-S        | EST: similar to none, mRNA sequence.        | 3525.0435 |
| 7181 | U70663_at_GI_34916057-S        | Zinc finger transcription factor hEZF (EZF) | 3525.075  |
| 7182 | M59979_at_GI_18104968-A        | PTGS1 Prostaglandin-endoperoxide            | 3525.1394 |
| 7183 | RC_AA227146_at_NA_illumina     | EST: zr22c03.s1 Stratagene NT2 neuronal     | 3525.2383 |
| 7184 | X99374_s_at_GI_11497606-S      | Fertilin beta mRNA                          | 3525.3108 |
| 7185 | D31833_s_at_GI_13112055-S      | AVPR1B Arginine vasopressin receptor 1B     | 3525.314  |
| 7186 | X84195_at-2_NA_illumina        | Acylphosphatase 2, muscle type              | 3525.3467 |
| 7187 | X84195_at_GI_20336764-S        | Acylphosphatase, muscle type (MT)           | 3525.3467 |
| 7188 | AC000115_cds1_at_GI_31543932-S | WUGSC:H_GS188P18.1a gene extracted          | 3525.3972 |
| 7189 | AC000115_cds1_at-2_NA_illumina | Human DNA sequence from PAC 196E23          | 3525.3972 |
| 7190 | M31951_at_GI_40254807-S        | PERFORIN 1 PRECURSOR                        | 3525.4243 |
| 7191 | D83017_s_at_GI_45269146-S      | Nel-related protein                         | 3525.426  |
| 7192 | Z83806_at_GI_15029525-S        | Axonemal dynein heavy chain (partial, ID    | 3525.4556 |
| 7193 | L07515_at_GI_6912291-S         | HETEROCHROMATIN PROTEIN 1                   | 3525.6064 |
| 7194 | L07515_at-2_NA_illumina        | Human heterochromatin protein               | 3525.6064 |
| 7195 | M21388_at_NA_illumina          | Unproductively rearranged Ig mu-chain       | 3525.6387 |
| 7196 | N31013_at_GI_11072100-S        | EST: yx51d01.r1 Homo sapiens cDNA           | 3525.6462 |
| 7197 | RC_AA620637_at_GI_27735044-S   | EST: af84d04.s1 Soares testis NHT Homo      | 3525.7024 |
| 7198 | M82967_s_at_NA_illumina        | Acrosomal vesicle protein 1                 | 3525.8506 |
| 7199 | H66367_at_GI_20544175-S        | EST: yu14a06.r1 Homo sapiens cDNA           | 3525.9812 |
| 7200 | RC_AA232126_at_NA_illumina     | EST: zr45b12.s1 Soares NhHMPu S1            | 3525.983  |
| 7201 | M60331_at_GI_4506108-S         | PRM1 Protamine 1                            | 3526.0054 |
| 7202 | RC_AA461072_at_NA_illumina     | EST: zx61h05.s1 Soares total fetus          | 3526.0154 |
| 7203 | RC_AA029906_s_at_NA_illumina   | EST: zk08f05.s1 Soares pregnant uterus      | 3526.033  |
| 7204 | AA285284_at_NA_illumina        | Homo sapiens NADP-dependent isocitrate      | 3526.0835 |
| 7205 | S83308_at_GI_30061557-A        | SOX5                                        | 3526.138  |
| 7206 | S83308_at-2_NA_illumina        | SOX5                                        | 3526.138  |
| 7207 | X72304_at_NA_illumina          | CORTICOTROPIN RELEASING FACTOR              | 3526.2073 |
| 7208 | RC_AA432378_at_GI_18373307-S   | EST: zw76c08.s1 Soares testis NHT           | 3526.222  |
| 7209 | R98173_at_GI_37540832-S        | Homo sapiens mRNA for KIAA0518              | 3526.2705 |
| 7210 | J00117_f_at_NA_illumina        | Chorionic gonadotropin (hcg) beta subunit   | 3526.319  |
| 7211 | RC_AA054715_at_NA_illumina     | EST: zk68a03.s1 Soares pregnant uterus      | 3526.4846 |
| 7212 | L44574_at_GI_19913360-A        | EST: Homo sapiens thymus mRNA               | 3526.493  |



|      |                              |                                            |           |
|------|------------------------------|--------------------------------------------|-----------|
| 7213 | RC_AA236790_at_GI_27481474-S | EST: zr76e12.s1 Soares NhHMPu S1           | 3526.511  |
| 7214 | U43527_at_GI_29571103-S      | Malignant melanoma metastasis-             | 3526.552  |
| 7215 | U43527_at-2_NA_illumina      | KiSS-1 metastasis-suppressor               | 3526.552  |
| 7216 | RC_AA043733_at_NA_illumina   | EST: zk51b10.s1 Soares pregnant uterus     | 3526.5676 |
| 7217 | Z20656_rna1_s_at_NA_illumina | Of cardiac alpha-myosin heavy chain gene   | 3526.6155 |
| 7218 | AA426304_r_at_GI_45504379-S  | EST: zw11g07.r1 Soares NhHMPu S1           | 3526.7336 |
| 7219 | RC_AA256153_s_at_NA_illumina | EST: zr79a09.s1 Soares NhHMPu S1           | 3526.8088 |
| 7220 | Y09912_rna1_at_GI_31377807-S | AP-2 beta gene                             | 3526.817  |
| 7221 | RC_AA495952_at_NA_illumina   | EST: zw06a08.s1 Soares NhHMPu S1           | 3526.9805 |
| 7222 | AF012549_at_GI_24430182-A    | Outer dense fibre of sperm tails 2         | 3527.0232 |
| 7223 | RC_AA290599_at_NA_illumina   | EST: zs45c01.s1 NCI_CGAP_GCB1              | 3527.0244 |
| 7224 | U77413_at_GI_32307149-A      | O-linked GlcNAc transferase mRNA           | 3527.0593 |
| 7225 | W16700_at_NA_illumina        | EST: zb07e12.r1 Soares fetal lung          | 3527.2642 |
| 7226 | S83390_s_at_GI_5454073-S     | T3 receptor-associating cofactor-1 [human, | 3527.2834 |
| 7227 | M96132_at_NA_illumina        | MHC class II HLA-DR-beta-1*09012 (HLA-     | 3527.3452 |
| 7228 | AA248470_at_GI_19923724-S    | EST: csg3757.seq.F Human fetal heart,      | 3527.3633 |
| 7229 | U24153_at_GI_32483398-S      | P21-activated protein kinase (Pak2) gene   | 3527.416  |
| 7230 | W26666_at_NA_illumina        | EST: 11a12 Human retina cDNA randomly      | 3527.4324 |
| 7231 | W17304_at_NA_illumina        | Homo sapiens mRNA for KIAA0907             | 3527.514  |
| 7232 | H67413_s_at_NA_illumina      | EST: yu52b02.r1 Homo sapiens cDNA          | 3527.577  |
| 7233 | RC_AA131572_at_NA_illumina   | EST: zl33b02.s1 Soares pregnant uterus     | 3527.618  |
| 7234 | T97111_at_GI_14249535-S      | EST: ye41d04.r1 Homo sapiens cDNA          | 3527.6284 |
| 7235 | RC_AA421487_at_GI_21396499-S | EST: zu06g09.s1 Soares testis NHT Homo     | 3527.629  |
| 7236 | RC_AA022645_at_NA_illumina   | EST: ze71b02.s1 Soares fetal heart         | 3527.7048 |
| 7237 | RC_AA464273_at_GI_19743795-A | EST: zx81e09.s1 Soares ovary tumor         | 3527.725  |
| 7238 | W26785_i_at_NA_illumina      | EST: 15d6 Human retina cDNA randomly       | 3527.7292 |
| 7239 | AA251957_at_NA_illumina      | EST: zs09f10.r1 NCI_CGAP_GCB1 Homo         | 3527.77   |
| 7240 | M36205_at_GI_7657674-S       | SYNAPTOBREVIN 2                            | 3527.7883 |
| 7241 | U62531_at_GI_21361550-S      | SLC4A2 Solute carrier family 4, anion      | 3527.8242 |
| 7242 | AA280253_at_NA_illumina      | Human activated p21cdc42Hs kinase (ack)    | 3527.8677 |
| 7243 | L26081_at_GI_5174672-S       | Semaphorin-III (Hsema-I) mRNA              | 3527.9968 |
| 7244 | AA227366_at_NA_illumina      | EST: zr17h05.r1 Stratagene NT2 neuronal    | 3528.0613 |
| 7245 | RC_AA479273_at_NA_illumina   | Myosin, heavy polypeptide 11, smooth       | 3528.0981 |
| 7246 | AA406433_at_GI_31342615-S    | EST: zv12d10.r1 Soares NhHMPu S1           | 3528.136  |
| 7247 | RC_AA025352_at_NA_illumina   | EST: ze74h04.s1 Soares fetal heart         | 3528.175  |
| 7248 | AA094392_at_NA_illumina      | EST: cp0209.seq.F Fetal heart, Lambda      | 3528.2952 |
| 7249 | Y00443_at_NA_illumina        | Protamine 1                                | 3528.3406 |
| 7250 | Y08134_at_NA_illumina        | ASM-like phosphodiesterase 3b              | 3528.441  |
| 7251 | Y08134_at-2_NA_illumina      | H.sapiens mRNA for ASM-like                | 3528.441  |
| 7252 | T68083_at_NA_illumina        | Short-chain dehydrogenase/reductase 1      | 3528.4998 |
| 7253 | RC_AA418398_at_NA_illumina   | Neuropilin 2                               | 3528.5364 |
| 7254 | AA215971_at_GI_21361584-S    | Carcinoembryonic antigen                   | 3528.544  |
| 7255 | L29433_at_GI_9961350-S       | COAGULATION FACTOR X                       | 3528.576  |

|      |                              |                                           |           |
|------|------------------------------|-------------------------------------------|-----------|
| 7256 | W25986_at_NA_illumina        | EST: 17e7 Human retina cDNA randomly      | 3528.621  |
| 7257 | L32832_s_at-2_NA_illumina    | AT-binding transcription factor 1         | 3528.6572 |
| 7258 | L32832_s_at_GI_19923286-S    | Zinc finger homeodomain protein (ATBF1-   | 3528.6572 |
| 7259 | U10685_at_GI_29029613-S      | MAGE-10 antigen (MAGE10) gene             | 3528.6584 |
| 7260 | U10685_at-2_NA_illumina      | Melanoma antigen, family A, 10            | 3528.6584 |
| 7261 | X98494_at_GI_31317304-S      | H.sapiens mRNA for M phase                | 3528.6873 |
| 7262 | W17400_at_NA_illumina        | EST: zb15b10.r1 Soares fetal lung         | 3528.721  |
| 7263 | X54489_rna1_at_GI_4504152-S  | Melanoma growth stimulatory activity      | 3528.7297 |
| 7264 | M94151_at_GI_7656998-S       | Cadherin-associated protein-related (cap- | 3528.8137 |
| 7265 | M91222_at_GI_42794610-S      | EST: HUMRTPGEG Homo sapiens cDNA.         | 3528.8896 |
| 7266 | U73531_at_GI_5730105-S       | Human G protein-coupled receptor          | 3528.924  |
| 7267 | RC_AA421470_at_GI_45356742-S | EST: zu06b12.s1 Soares testis NHT Homo    | 3528.9548 |
| 7268 | AA179759_at_NA_illumina      | EST: zp50c08.r1 Stratagene HeLa cell s3   | 3529.0718 |
| 7269 | T78668_r_at_GI_24475724-S    | EST: yd01b06.r1 Homo sapiens cDNA         | 3529.2566 |
| 7270 | RC_AA485673_at_NA_illumina   | EST: zx91b06.s1 Soares ovary tumor        | 3529.2861 |
| 7271 | AA485038_at_GI_37552316-S    | Aa41g01.r1 NCI_CGAP_GCB1 Homo             | 3529.6558 |
| 7272 | RC_AA398104_at_GI_38502322-S | EST: zt58d03.s1 Soares testis NHT Homo    | 3529.8228 |
| 7273 | RC_AA227866_at_NA_illumina   | EST: zr56c08.s1 Soares NhHMPu S1          | 3529.858  |
| 7274 | W01059_at_NA_illumina        | EST: za55e09.r1 Soares fetal liver spleen | 3529.9692 |
| 7275 | RC_AA418046_at_GI_27479554-S | EST: zv97f10.s1 Soares NhHMPu S1          | 3529.9807 |
| 7276 | T08870_at_GI_7019466-S       | EST: EST06762 Homo sapiens cDNA           | 3530.0427 |
| 7277 | U38896_at_GI_45439300-A      | Zinc finger protein C2H2-171 mRNA         | 3530.0525 |
| 7278 | RC_AA428990_at_GI_31543092-S | EST: zw19c12.s1 Soares ovary tumor        | 3530.1182 |
| 7279 | J02871_s_at_GI_13435388-S    | CYP4B1 Cytochrome P450 IVB1               | 3530.2405 |
| 7280 | RC_AA226773_at_NA_illumina   | EST: zr21c08.s1 Stratagene NT2 neuronal   | 3530.2556 |
| 7281 | Z78285_f_at_NA_illumina      | Z78285 Homo sapiens brain fetus Homo      | 3530.306  |
| 7282 | RC_AA435597_at_GI_24308088-S | EST: zt85g06.s1 Soares testis NHT Homo    | 3530.3323 |
| 7283 | M76558_at_GI_4502526-S       | Neuronal DHP-sensitive, voltage-          | 3530.336  |
| 7284 | N78064_at_GI_14150142-S      | EST: yv72a02.r1 Soares fetal liver spleen | 3530.3384 |
| 7285 | M93311_at_GI_5174761-S       | GIF                                       | 3530.495  |
| 7286 | X63380_at_GI_5174542-S       | MYOCYTE-SPECIFIC ENHANCER                 | 3530.5215 |
| 7287 | X16666_s_at_GI_24497525-S    | HOXB1 Homeo box B1                        | 3530.5469 |
| 7288 | X16666_s_at-2_NA_illumina    | Homeo box B1                              | 3530.5469 |
| 7289 | RC_AA521073_at_NA_illumina   | EST: aa72a05.s1 NCI_CGAP_GCB1             | 3530.6194 |
| 7290 | RC_AA007312_at_NA_illumina   | EST: zh98d02.s1 Soares fetal liver spleen | 3530.6538 |
| 7291 | RC_AA151872_at_NA_illumina   | EST: zn99a05.s1 Stratagene colon          | 3530.6946 |
| 7292 | AA317441_at_NA_illumina      | EST: EST19585 Retina II Homo sapiens      | 3530.89   |
| 7293 | R67763_at_NA_illumina        | Myosin phosphatase, target subunit 1      | 3530.9238 |
| 7294 | RC_AA194311_at_GI_7019556-S  | EST: zq04h10.s1 Stratagene muscle         | 3530.9639 |
| 7295 | HG4724-HT5166_at_NA_illumina | Atp-Binding Cassette Protein              | 3531.294  |
| 7296 | X92814_at_GI_5901975-S       | Rat HREV107-like protein                  | 3531.358  |
| 7297 | W27835_at_NA_illumina        | Homo sapiens ornithine decarboxylase      | 3531.5535 |
| 7298 | N78005_at_GI_15055542-S      | Homo sapiens SRp46 splicing factor        | 3531.554  |

|      |                              |                                            |           |
|------|------------------------------|--------------------------------------------|-----------|
| 7299 | AA463304_at_GI_22749158-S    | Zx71d02.r1 Soares total fetus Nb2HF8 9w    | 3531.6868 |
| 7300 | M24349_s_at_NA_illumina      | Parathyroid hormone-like protein (PLP)     | 3531.6956 |
| 7301 | W58247_s_at_GI_7305204-S     | EST: zd18d11.r1 Soares fetal heart         | 3531.7537 |
| 7302 | U65533_s_at_NA_illumina      | KIAA0221 gene                              | 3532.0056 |
| 7303 | R55902_at_GI_32996732-A      | Yg92d05.r1 Homo sapiens cDNA clone         | 3532.1052 |
| 7304 | W79610_at_NA_illumina        | EST: zd81e08.r1 Soares fetal heart         | 3532.1345 |
| 7305 | AA464368_s_at_GI_41350215-S  | EST: zx81c11.r1 Soares ovary tumor         | 3532.2007 |
| 7306 | M28827_at_GI_4502646-S       | CD1C CD1c antigen (thymocyte antigen)      | 3532.3044 |
| 7307 | U95367_at_GI_7657105-S       | Human GABA-A receptor pi subunit           | 3532.3354 |
| 7308 | RC_AA417350_at_NA_illumina   | EST: zu07f07.s1 Soares testis NHT Homo     | 3532.3523 |
| 7309 | RC_AA369245_at_NA_illumina   | EST: EST80630 Placenta II Homo sapiens     | 3532.424  |
| 7310 | RC_AA232953_at_NA_illumina   | EST: zr46f07.s1 Soares NhHMPu S1           | 3532.4526 |
| 7311 | AA236820_at_NA_illumina      | EST: zr76c10.r1 Soares NhHMPu S1           | 3532.602  |
| 7312 | AA209239_at_GI_34147685-S    | EST: zq85h01.r1 Stratagene hNT neuron      | 3532.656  |
| 7313 | RC_AA304344_i_at_NA_illumina | EST: EST17092 Aorta endothelial cells,     | 3532.7505 |
| 7314 | AFFX-PheX-M_at_NA_illumina   | AFFX-PheX-M_at (endogenous control)        | 3532.8513 |
| 7315 | AFFX-PheX-M_at-2_NA_illumina | AFFX-PheX-M_at (miscellaneous control -    | 3532.8513 |
| 7316 | RC_AA121433_s_at_NA_illumina | Axin                                       | 3532.904  |
| 7317 | Z36531_at_GI_5730074-S       | FGL1 Fibrinogen-like 1                     | 3532.998  |
| 7318 | Z36531_at-2_NA_illumina      | H.sapiens mRNA for fibrinogen-like protein | 3532.998  |
| 7319 | C14228_f_at_NA_illumina      | EST: Human fetal brain cDNA 5'-end GEN-    | 3533.0613 |
| 7320 | AA416829_at_NA_illumina      | EST: zu08e03.r1 Soares testis NHT Homo     | 3533.1807 |
| 7321 | AA249336_at_GI_27597083-S    | EST: j0315.seq.F Human fetal heart,        | 3533.355  |
| 7322 | W31698_at_NA_illumina        | Zinc finger protein 42 (myeloid-specific   | 3533.443  |
| 7323 | RC_AA453441_at_NA_illumina   | EST: zx32h09.s1 Soares total fetus         | 3533.4456 |
| 7324 | D90041_s_at_NA_illumina      | N-acetyltransferase 1 (arylamine N-        | 3533.4492 |
| 7325 | RC_AA482015_at_GI_34147595-S | EST: zu98d08.s1 NCI_CGAP_GCB1              | 3533.497  |
| 7326 | AB002345_at_GI_12707560-A    | PERIOD, DROSOPHILA, HOMOLOG OF,            | 3533.585  |
| 7327 | RC_AA426584_at_NA_illumina   | EST: zw02h10.s1 Soares NhHMPu S1           | 3533.7585 |
| 7328 | L07597_at_GI_20149546-S      | RPS6KA2 Ribosomal protein S6 kinase,       | 3533.8271 |
| 7329 | RC_AA401433_at_GI_41393548-S | EST: zu68h02.s1 Soares testis NHT Homo     | 3533.971  |
| 7330 | RC_AA147884_at_GI_18490999-A | EST: zl50b04.s1 Soares pregnant uterus     | 3534.1177 |
| 7331 | AA287291_at_GI_24308176-S    | EST: zs49g11.r1 NCI_CGAP_GCB1 Homo         | 3534.1777 |
| 7332 | AB002317_s_at_GI_7662053-S   | KIAA0319 gene product                      | 3534.2017 |
| 7333 | X73882_at_GI_45594308-S      | E-MAP-115 mRNA                             | 3534.2017 |
| 7334 | AA282312_s_at_GI_16554588-A  | CTD (carboxy-terminal domain, RNA          | 3534.2053 |
| 7335 | U80456_at_GI_7108361-A       | Transcription factor SIM2 long form mRNA   | 3534.3328 |
| 7336 | Z48475_at_GI_30795244-S      | GCKR Glucokinase regulator                 | 3534.4438 |
| 7337 | Z48475_at-2_NA_illumina      | Glucokinase (hexokinase 4) regulatory      | 3534.4438 |
| 7338 | X16282_at-2_NA_illumina      | Human mRNA for zinc finger protein (clone  | 3534.4897 |
| 7339 | X16282_at_NA_illumina        | Zinc finger protein (clone 647)            | 3534.4897 |
| 7340 | N98305_at_GI_37039614-A      | EST: yy68d04.r1 Homo sapiens cDNA          | 3534.5698 |
| 7341 | RC_AA043790_at_NA_illumina   | EST: zk59f12.s1 Soares pregnant uterus     | 3534.6182 |

|      |                              |                                           |           |
|------|------------------------------|-------------------------------------------|-----------|
| 7342 | M33318_r_at_NA_illumina      | CYP2A6 Cytochrome P450, subfamily IIA     | 3534.671  |
| 7343 | AA399338_at_NA_illumina      | EST: zt49d10.r1 Soares ovary tumor        | 3534.685  |
| 7344 | U39226_at_GI_4505306-S       | Myosin VIIA (USH1B) mRNA                  | 3534.7715 |
| 7345 | U39226_at-2_NA_illumina      | Myosin VIIA (Usher syndrome 1B            | 3534.7715 |
| 7346 | RC_AA457302_at_GI_21245119-S | EST: aa88h01.s1 Stratagene fetal retina   | 3534.887  |
| 7347 | AA114847_at_GI_14149733-S    | EST: zl02b10.r1 Soares pregnant uterus    | 3534.8992 |
| 7348 | R48644_s_at_GI_13569839-S    | EST: yj68e04.r1 Homo sapiens cDNA         | 3534.9377 |
| 7349 | U43286_at_GI_24797146-S      | Selenophosphate synthetase 2 (SPS2)       | 3535.0776 |
| 7350 | RC_AA258185_at_NA_illumina   | EST: zs35f12.s1 NCI_CGAP_GCB1 Homo        | 3535.1235 |
| 7351 | W52085_at_NA_illumina        | EST: zc48a08.r1 Soares senescent          | 3535.199  |
| 7352 | D31764_at_GI_23238249-S      | KIAA0064 gene                             | 3535.2297 |
| 7353 | AA291147_at_GI_33469953-A    | Homo sapiens mRNA for KIAA0765            | 3535.2297 |
| 7354 | AA187101_at_GI_30581119-S    | Zp61b06.r1 Stratagene endothelial cell    | 3535.2876 |
| 7355 | RC_AA291771_at_GI_27734848-S | EST: zt45g06.s1 Soares ovary tumor        | 3535.3665 |
| 7356 | H78628_at_GI_37537721-S      | EST: yu26c05.r1 Homo sapiens cDNA         | 3535.5667 |
| 7357 | RC_AA459968_at_NA_illumina   | EST: zx66c12.s1 Soares total fetus        | 3535.5674 |
| 7358 | N79930_s_at_NA_illumina      | EST: yz86c05.r1 Homo sapiens cDNA         | 3535.5813 |
| 7359 | M63838_s_at_GI_5031778-S     | Interferon-gamma induced protein (IFI 16) | 3535.6262 |
| 7360 | HG3033-HT3194_at_NA_illumina | Spliceosomal Protein Sap 62               | 3535.6501 |
| 7361 | U00802_s_at_GI_18426914-A    | Drebrin E                                 | 3535.9458 |
| 7362 | AA071311_at_NA_illumina      | Zm73f12.r1 Stratagene neuroepithelium     | 3535.9734 |
| 7363 | L25851_at_GI_6007850-S       | INTEGRIN ALPHA-E PRECURSOR                | 3536.1133 |
| 7364 | M60752_at_GI_19557649-S      | Histone H2A.1 (H2A) gene                  | 3536.1218 |
| 7365 | RC_AA460293_at_GI_18375635-S | EST: zx51b08.s1 Soares testis NHT Homo    | 3536.1658 |
| 7366 | RC_AA442078_at_GI_22749072-S | EST: zw63c01.s1 Soares total fetus        | 3536.1753 |
| 7367 | RC_AA279673_at_GI_4885250-S  | Cyclin G associated kinase                | 3536.7314 |
| 7368 | X94703_at_GI_4758993-S       | Rab28 mRNA                                | 3536.8064 |
| 7369 | X94703_at-2_NA_illumina      | RAB28, member RAS oncogene family         | 3536.8064 |
| 7370 | AFFX-DapX-3_at_NA_illumina   | AFFX-DapX-3_at (endogenous control)       | 3536.8281 |
| 7371 | AFFX-DapX-3_at-2_NA_illumina | AFFX-DapX-3_at (miscellaneous control -   | 3536.8281 |
| 7372 | RC_AA235992_at_NA_illumina   | EST: zs41h04.s1 Soares NhHMPu S1          | 3536.838  |
| 7373 | M31166_at_GI_31543449-S      | PTX3 Pentaxin-related gene, rapidly       | 3536.917  |
| 7374 | N57397_at_NA_illumina        | EST: yw82a03.r1 Homo sapiens cDNA         | 3536.939  |
| 7375 | D13626_at_NA_illumina        | KIAA0001 gene                             | 3536.9756 |
| 7376 | AA401575_at_GI_13375961-S    | EST: zu62b07.r1 Soares testis NHT Homo    | 3536.9846 |
| 7377 | U67784_at_GI_31083343-S      | Orphan G protein-coupled receptor         | 3537.0286 |
| 7378 | RC_AA479190_at_NA_illumina   | Homo sapiens clone DT1P1B6 mRNA,          | 3537.0598 |
| 7379 | HG2479-HT2575_at_NA_illumina | Helix-Loop-Helix Protein Sef2-1d          | 3537.1506 |
| 7380 | U51711_at_GI_40806177-A      | DESMOCOLLIN 2A/BB PRECURSOR               | 3537.1797 |
| 7381 | AA210757_at_NA_illumina      | Transcription factor 3 (E2A               | 3537.341  |
| 7382 | J05480_s_at_NA_illumina      | Protein phosphatase 3 (formerly 2B),      | 3537.3423 |
| 7383 | RC_AA505141_at_NA_illumina   | EST: aa65e04.s1 NCI_CGAP_GCB1             | 3537.4463 |
| 7384 | Z19643_at_GI_34485719-S      | EST: H. sapiens putatively transcribed    | 3537.492  |

|      |                               |                                              |           |
|------|-------------------------------|----------------------------------------------|-----------|
| 7385 | RC_AA453498_at_GI_45269150-S  | Homo sapiens Rap1 guanine-nucleotide         | 3537.5857 |
| 7386 | D82286_at_NA_illumina         | EST: similar to none, mRNA sequence.         | 3537.5857 |
| 7387 | H56511_at_NA_illumina         | Homo sapiens Chromosome 16 BAC clone         | 3537.6675 |
| 7388 | D87461_at_GI_14574571-S       | KIAA0271 gene                                | 3537.7805 |
| 7389 | RC_AA425653_at_NA_illumina    | EST: zw47e04.s1 Soares total fetus           | 3537.9087 |
| 7390 | RC_AA099357_at_GI_27436954-A  | EST: zk85c01.s1 Soares pregnant uterus       | 3537.9146 |
| 7391 | W27139_at_NA_illumina         | Homo sapiens mRNA for KIAA0584               | 3537.929  |
| 7392 | D78725_at_GI_7662375-S        | Homo sapiens mRNA for KIAA0914               | 3537.9321 |
| 7393 | L42583_f_at_GI_17505186-S     | KERATIN, TYPE II CYTOSKELETAL 6D             | 3538.0134 |
| 7394 | RC_AA403032_at_GI_30794375-S  | EST: zu55a10.s1 Soares ovary tumor           | 3538.0488 |
| 7395 | RC_AA463929_at_NA_illumina    | EST: zx82e08.s1 Soares ovary tumor           | 3538.5273 |
| 7396 | AA078906_at_NA_illumina       | Zm94c04.r1 Stratagene colon HT29             | 3538.6145 |
| 7397 | AA346065_at_GI_31657110-S     | EST: EST52164 Greater omentum II Homo        | 3538.6511 |
| 7398 | U82108_s_at-2_NA_illumina     | Solute carrier family 9 (sodium/hydrogen     | 3538.744  |
| 7399 | U82108_s_at_GI_4759141-S      | SIP-1 mRNA                                   | 3538.744  |
| 7400 | X95384_at_NA_illumina         | Unknown 14kDa protein                        | 3538.7913 |
| 7401 | U48224_at_GI_21536442-S       | Bfps2, Cytoskeletal protein, 49-kD           | 3538.8103 |
| 7402 | X58964_at_GI_19743876-S       | MHC class II regulatory factor RFX           | 3539.0686 |
| 7403 | AA249460_at_GI_40538791-S     | EST: j5259.seq.F Human fetal heart,          | 3539.3684 |
| 7404 | AA203556_at_NA_illumina       | EST: zx52a08.r1 Soares fetal liver spleen    | 3539.4    |
| 7405 | HG2797-HT2905_at_NA_illumina  | Clathrin, Light Polypeptide B, Alt. Splice 1 | 3539.4468 |
| 7406 | H19258_at_NA_illumina         | Yn50b11.r1 Homo sapiens cDNA clone           | 3539.457  |
| 7407 | RC_AA453458_at_NA_illumina    | EST: zx45b04.s1 Soares testis NHT Homo       | 3539.685  |
| 7408 | RC_AA398774_at_NA_illumina    | EST: zt64c08.s1 Soares testis NHT Homo       | 3539.7004 |
| 7409 | RC_AA039595_at_NA_illumina    | EST: zf08d12.s1 Soares fetal heart           | 3539.7144 |
| 7410 | RC_AA143343_at_NA_illumina    | EST: zo31g12.s1 Stratagene colon             | 3539.982  |
| 7411 | AA024727_s_at_NA_illumina     | EST: ze79f03.r1 Soares fetal heart           | 3539.9836 |
| 7412 | S68287_at_GI_24497584-S       | CHDR Chlordecone reductase                   | 3540.2168 |
| 7413 | AFFX-BioB-5_st-2_NA_illumina  | AFFX-BioB-5_st (miscellaneous control -      | 3540.2346 |
| 7414 | AFFX-BioB-5_st_NA_illumina    | AFFX-BioB-5_st (endogenous control)          | 3540.2346 |
| 7415 | RC_AA293153_s_at_NA_illumina  | EST: zt55d06.s1 Soares ovary tumor           | 3540.2585 |
| 7416 | HG627-HT5098_s_at_NA_illumina | Rhesus (Rh) Blood Group System Ce-           | 3540.4324 |
| 7417 | U33017_at_GI_4506968-S        | Signaling lymphocytic activation molecule    | 3540.5806 |
| 7418 | X83857_s_at_NA_illumina       | PTGER3 Prostaglandin E receptor 3            | 3540.5894 |
| 7419 | M63623_at_GI_19923224-S       | MOG Myelin oligodendrocyte glycoprotein      | 3540.5964 |
| 7420 | L14542_at_GI_7262385-A        | Lectin-like type II integral membrane        | 3540.63   |
| 7421 | AA282317_at_NA_illumina       | EST: zt12a01.r1 NCI_CGAP_GCB1 Homo           | 3540.7566 |
| 7422 | D79276_at_GI_29788999-S       | Eukaryotic translation elongation factor 1   | 3540.7852 |
| 7423 | D38555_at_GI_38373670-A       | KIAA0079 gene                                | 3540.8525 |
| 7424 | AA436291_at_NA_illumina       | EST: zv22c07.r1 Soares NhHMPu S1             | 3541.0256 |
| 7425 | U53446_at_GI_4503250-S        | Mitogen-responsive phosphoprotein (DOC-      | 3541.03   |
| 7426 | S81737_s_at_GI_18765742-S     | SNT1 Syntrophin, alpha (dystrophin-          | 3541.1853 |
| 7427 | AA203433_at_GI_24308032-S     | EST: zx58g01.r1 Soares fetal liver spleen    | 3541.3801 |

|      |                               |                                            |           |
|------|-------------------------------|--------------------------------------------|-----------|
| 7428 | RC_AA001359_at_NA_illumina    | EST: zh83d11.s1 Soares fetal liver spleen  | 3541.4067 |
| 7429 | D25216_at_GI_7661859-S        | KIAA0014 gene                              | 3541.496  |
| 7430 | D25216_at-2_NA_illumina       | KIAA0014 gene product                      | 3541.496  |
| 7431 | Y11416_at_GI_4885644-S        | P73                                        | 3541.531  |
| 7432 | AA424282_at_NA_illumina       | Polymyositis/scleroderma autoantigen 1     | 3541.7244 |
| 7433 | RC_AA463871_at_NA_illumina    | Dystonia 1, torsion (autosomal dominant)   | 3541.79   |
| 7434 | AA009826_at_GI_30151559-S     | EST: ze82b02.r1 Soares fetal heart         | 3541.799  |
| 7435 | N32716_at_NA_illumina         | EST: yx74h12.r1 Homo sapiens cDNA          | 3541.8496 |
| 7436 | S78825_at_GI_31317298-A       | ID1 Inhibitor of DNA binding 1, dominant   | 3542.1143 |
| 7437 | R69018_at_GI_7657197-S        | Homo sapiens mRNA for putative             | 3542.1672 |
| 7438 | AA018758_at_NA_illumina       | EST: ze51d12.r1 Soares retina N2b4HR       | 3542.1853 |
| 7439 | RC_AA478587_at_NA_illumina    | Homo sapiens mRNA for leukemia             | 3542.2405 |
| 7440 | D10923_at_NA_illumina         | PROBABLE G PROTEIN-COUPLED                 | 3542.3977 |
| 7441 | RC_AA155803_at_NA_illumina    | EST: zo48h01.s1 Stratagene endothelial     | 3542.404  |
| 7442 | HG2689-HT2785_at_NA_illumina  | Mucin 5b, Tracheobronchial (Gb:X74955)     | 3542.6824 |
| 7443 | R25944_f_at_NA_illumina       | EST: yh44b01.r1 Homo sapiens cDNA          | 3542.9785 |
| 7444 | RC_AA285144_s_at_GI_13899242- | EST: zs48h10.s1 NCI_CGAP_GCB1              | 3542.982  |
| 7445 | U79280_at-2_NA_illumina       | Human clone 23575 mRNA, partial cds        | 3543.0085 |
| 7446 | U79280_at_NA_illumina         | Clone 23575 mRNA, partial cds              | 3543.0085 |
| 7447 | D67029_at_GI_4506866-S        | SEC14L SEC14 (S. cerevisiae)-like          | 3543.0864 |
| 7448 | AA167043_at_GI_13376244-S     | EST: zo86d03.r1 Stratagene ovarian         | 3543.1985 |
| 7449 | Z20481_at_GI_21735416-S       | Homo sapiens mRNA for KIAA0699             | 3543.2727 |
| 7450 | RC_AA480889_at_NA_illumina    | EST: aa28d07.s1 NCI_CGAP_GCB1              | 3543.351  |
| 7451 | AA085696_at_NA_illumina       | EST: zl83a10.r1 Stratagene colon           | 3543.4246 |
| 7452 | RC_AA479620_at_NA_illumina    | EST: zu31e10.s1 Soares ovary tumor         | 3543.44   |
| 7453 | R14652_at_GI_38201658-A       | Homo sapiens PAC clone DJ0872F07           | 3543.4426 |
| 7454 | D32001_at_GI_40316911-S       | HuSAA1g gene for serum amyloid A1          | 3543.4683 |
| 7455 | RC_AA187437_at_NA_illumina    | EST: zp70d01.s1 Stratagene endothelial     | 3543.5447 |
| 7456 | X99977_at_NA_illumina         | H.sapiens ARS gene, component B            | 3543.7043 |
| 7457 | D84424_at_GI_4504338-S        | Fetal brain mRNA for hyaluronan synthase   | 3543.7974 |
| 7458 | RC_AA459277_at_GI_22748918-S  | EST: zx89a01.s1 Soares ovary tumor         | 3543.9165 |
| 7459 | RC_AA399377_at_NA_illumina    | EST: zt57f12.s1 Soares testis NHT Homo     | 3544.1587 |
| 7460 | RC_AA451861_at_GI_11641268-S  | EST: zx12g08.s1 Soares total fetus         | 3544.3975 |
| 7461 | U94319_at_GI_16945969-A       | Autoantigen DFS70 mRNA, partial cds        | 3544.4653 |
| 7462 | U32114_at_GI_38176291-A       | Caveolin-2 mRNA                            | 3544.5315 |
| 7463 | RC_AA621239_at_NA_illumina    | EST: zu81h12.s1 Soares testis NHT Homo     | 3544.5938 |
| 7464 | RC_AA402610_at_GI_21450847-A  | Homo sapiens mRNA for KIAA0548             | 3544.6797 |
| 7465 | C17548_at_GI_15011940-A       | Human placenta cDNA 5'-end GEN-            | 3544.7231 |
| 7466 | Y10313_at_GI_4504606-S        | Nerve growth factor-inducible PC4          | 3544.7764 |
| 7467 | Y10313_at-2_NA_illumina       | Interferon-related developmental regulator | 3544.7764 |
| 7468 | RC_AA486723_at_NA_illumina    | EST: ab18g11.s1 Stratagene lung            | 3544.9556 |
| 7469 | RC_AA485100_at_NA_illumina    | EST: aa39g03.s1 NCI_CGAP_GCB1              | 3544.9814 |
| 7470 | U11701_at_GI_30795195-S       | LIM-homeobox domain protein (hLH-2)        | 3545.1428 |

|      |                                |                                             |           |
|------|--------------------------------|---------------------------------------------|-----------|
| 7471 | X12517_at_GI_4507126-S         | U1 small nuclear RNP-specific C protein     | 3545.1506 |
| 7472 | W81031_at_GI_23510349-A        | EST: zd84b05.r1 Soares fetal heart          | 3545.2673 |
| 7473 | M31153_at_GI_13904854-S        | CYTOCHROME P450 XVIIIA1                     | 3545.4424 |
| 7474 | W52686_at_NA_illumina          | EST: zc48c11.r1 Soares senescent            | 3545.4456 |
| 7475 | RC_AA157814_at_NA_illumina     | EST: zo35h03.s1 Stratagene colon            | 3545.7034 |
| 7476 | D50913_at_GI_24308012-S        | KIAA0123 gene, partial cds                  | 3545.9043 |
| 7477 | U03877_at_GI_9665252-A         | HEAT SHOCK 70 KD PROTEIN 1                  | 3546.138  |
| 7478 | Z31695_at_NA_illumina          | 43 kDa inositol polyphosphate 5-            | 3546.1824 |
| 7479 | U96136_at_NA_illumina          | Delta-catenin mRNA, partial cds             | 3546.1877 |
| 7480 | RC_AA401305_at_GI_21361502-S   | EST: zu68c01.s1 Soares testis NHT Homo      | 3546.2136 |
| 7481 | AF000573_rna1_at_GI_4504380-S  | Homogentisate 1,2-dioxygenase gene          | 3546.615  |
| 7482 | RC_AA431957_at_GI_40548371-S   | EST: zw77a01.s1 Soares testis NHT           | 3546.6936 |
| 7483 | RC_AA423884_at_NA_illumina     | Homo sapiens mRNA for KIAA0287 gene,        | 3546.819  |
| 7484 | T83397_at_GI_17999532-S        | Homo sapiens peroxisomal phytanoyl-CoA      | 3547.2986 |
| 7485 | X99657_at_GI_4506930-S         | Protein containing SH3 domain, SH3GL2       | 3547.3591 |
| 7486 | X99657_at-2_NA_illumina        | SH3-domain GRB2-like 2                      | 3547.3591 |
| 7487 | X60152_at_GI_20304090-S        | Zinc finger protein 2                       | 3547.496  |
| 7488 | N75618_at_GI_18379341-S        | EST: yw37c07.r1 Homo sapiens cDNA           | 3547.5115 |
| 7489 | X82554_rna1_at-2_NA_illumina   | RAB4, member RAS oncogene family            | 3547.5808 |
| 7490 | X82554_rna1_at_GI_5730062-S    | SPHAR gene for cyclin-related protein       | 3547.5808 |
| 7491 | RC_AA045815_at_NA_illumina     | EST: zk75c02.s1 Soares pregnant uterus      | 3547.7048 |
| 7492 | RC_AA028904_at_NA_illumina     | EST: zk11h11.s1 Soares pregnant uterus      | 3547.7415 |
| 7493 | RC_AA487510_at_NA_illumina     | EST: aa95c11.s1 Stratagene fetal retina     | 3547.8538 |
| 7494 | L26339_at_GI_21361430-S        | Autoantigen mRNA                            | 3547.8555 |
| 7495 | RC_AA477432_s_at_NA_illumina   | EST: zu42f03.s1 Soares ovary tumor          | 3547.9    |
| 7496 | J00306_at_GI_40254432-S        | Somatostatin I gene and flanks              | 3547.9204 |
| 7497 | RC_AA402043_at_NA_illumina     | EST: zu55h01.s1 Soares ovary tumor          | 3547.9377 |
| 7498 | X52611_s_at-2_NA_illumina      | Transcription factor AP-2 alpha (activating | 3548.0022 |
| 7499 | X52611_s_at_NA_illumina        | TRANSCRIPTION FACTOR AP-2                   | 3548.0022 |
| 7500 | RC_AA495950_at_GI_42544135-S   | EST: zw06a06.s1 Soares NhHMPu S1            | 3548.0127 |
| 7501 | RC_AA164203_at_NA_illumina     | Homo sapiens mRNA for KIAA0893              | 3548.2507 |
| 7502 | RC_AA416550_at_GI_41393594-S   | EST: zu05d12.s1 Soares testis NHT Homo      | 3548.4077 |
| 7503 | RC_AA122217_at_GI_28872783-A   | EST: zn83a11.s1 Stratagene lung             | 3548.409  |
| 7504 | RC_AA281465_at_GI_7706713-S    | EST: zt04c07.s1 NCI_CGAP_GCB1 Homo          | 3548.4956 |
| 7505 | W26105_at_NA_illumina          | EST: 22f7 Human retina cDNA randomly        | 3548.5247 |
| 7506 | D78011_at_GI_4503374-S         | Dihydropyrimidinase                         | 3548.7202 |
| 7507 | HG2171-HT2241_r_at_NA_illumina | 12-Lipoxygenase                             | 3548.8062 |
| 7508 | RC_AA234112_at_NA_illumina     | EST: zr74a05.s1 Soares NhHMPu S1            | 3548.83   |
| 7509 | R82863_at_NA_illumina          | Yj25e09.r1 Homo sapiens cDNA clone          | 3548.8723 |
| 7510 | R79356_at_GI_10092638-S        | EST: yi83a11.r1 Homo sapiens cDNA           | 3548.9126 |
| 7511 | RC_AA227901_at_GI_5454045-S    | Homo sapiens mRNA for Sec24 protein         | 3549.375  |
| 7512 | RC_AA191495_at_NA_illumina     | EST: zp88e03.s1 Stratagene HeLa cell s3     | 3549.4055 |
| 7513 | RC_AA132523_at_GI_21918830-S   | NF-E2-related factor 3                      | 3549.5457 |

|      |                              |                                            |           |
|------|------------------------------|--------------------------------------------|-----------|
| 7514 | RC_AA258874_at_GI_31377708-S | Homo sapiens clone 24422 mRNA              | 3549.6333 |
| 7515 | RC_AA156718_at_NA_illumina   | EST: zl18a04.s1 Soares pregnant uterus     | 3549.7368 |
| 7516 | RC_AA609285_at_NA_illumina   | EST: af13e06.s1 Soares testis NHT Homo     | 3549.7876 |
| 7517 | AB000464_at_NA_illumina      | mRNA, clone RES4-24A, exon 1, 2, 3, 4      | 3549.8394 |
| 7518 | AB000464_at-2_NA_illumina    | Homo sapiens mRNA, exon 1, 2, 3, 4,        | 3549.8394 |
| 7519 | RC_AA598505_at_GI_32129211-S | EST: ae38h10.s1 Gessler Wilms tumor        | 3549.9624 |
| 7520 | U06698_at_GI_45446748-S      | Neuronal kinesin heavy chain mRNA          | 3550.028  |
| 7521 | RC_AA609459_at_NA_illumina   | EST: zu72g07.s1 Soares testis NHT Homo     | 3550.0913 |
| 7522 | RC_AA054561_at_NA_illumina   | EST: zk83h03.s1 Soares pregnant uterus     | 3550.1636 |
| 7523 | RC_AA447153_at_GI_15718685-S | EST: zw93h05.s1 Soares total fetus         | 3550.2234 |
| 7524 | C17139_at_NA_illumina        | EST: Human placenta cDNA 5'-end GEN-       | 3551.1199 |
| 7525 | U09578_at_GI_34335241-S      | MAPKAP kinase (3pK) mRNA                   | 3551.2283 |
| 7526 | W28798_at_NA_illumina        | EST: 52g10 Human retina cDNA randomly      | 3551.3848 |
| 7527 | X06182_s_at_GI_4557694-S     | KIT V-kit Hardy-Zuckerman 4 feline         | 3551.5254 |
| 7528 | D82347_at_GI_4505376-S       | NEUROD1 Neurogenic differentiation 1       | 3551.6482 |
| 7529 | M59216_s_at_GI_12548775-S    | GABRB1 Gamma-aminobutyric acid             | 3551.8909 |
| 7530 | X14885_rna1_s_at_NA_illumina | Transforming growth factor-beta 3 (TGF-    | 3552.214  |
| 7531 | RC_AA478775_at_GI_19923645-S | EST: zv20b03.s1 Soares NhHMPu S1           | 3552.3604 |
| 7532 | RC_AA283922_at_NA_illumina   | EST: zs47h06.s1 NCI_CGAP_GCB1              | 3552.476  |
| 7533 | C00627_at_GI_23111045-A      | EST: HUMGS0008169, Human Gene              | 3552.5    |
| 7534 | D29958_at_NA_illumina        | KIAA0116 gene, partial cds                 | 3552.5295 |
| 7535 | W38566_at_NA_illumina        | EST: zb19a12.r1 Soares fetal lung          | 3552.632  |
| 7536 | AA282300_at_GI_37574611-S    | SET binding factor 1                       | 3552.748  |
| 7537 | RC_AA452829_at_GI_7657624-S  | EST: zx36d03.s1 Soares total fetus         | 3552.8357 |
| 7538 | RC_AA504814_at_NA_illumina   | Ribosomal protein L14                      | 3553.136  |
| 7539 | AA315932_at_NA_illumina      | EST: EST187735 Colon carcinoma (HCC)       | 3553.1702 |
| 7540 | RC_AA451863_at_NA_illumina   | EST: zx12g11.s1 Soares total fetus         | 3553.355  |
| 7541 | W19098_at_NA_illumina        | EST: zb15a03.r1 Soares fetal lung          | 3553.3794 |
| 7542 | AA489716_at_NA_illumina      | EST: aa43a01.r1 Soares NhHMPu S1           | 3553.4277 |
| 7543 | AA292417_at_GI_13376000-S    | EST: zt51f12.r1 Soares ovary tumor         | 3553.5552 |
| 7544 | AA206902_at_NA_illumina      | EST: zq80d01.r1 Stratagene hNT neuron      | 3553.6462 |
| 7545 | M80647_at_GI_13699839-A      | THROMBOXANE-A SYNTHASE                     | 3553.997  |
| 7546 | RC_AA488287_at_NA_illumina   | EST: ae30b06.s1 Gessler Wilms tumor        | 3554.1038 |
| 7547 | RC_AA504803_at_NA_illumina   | EST: aa64a06.s1 NCI_CGAP_GCB1              | 3554.1628 |
| 7548 | RC_AA281796_at_GI_4759109-S  | Mannose-P-dolichol utilization defect 1    | 3554.176  |
| 7549 | U03688_at_GI_13325059-S      | CYP1B1 Cytochrome P450 IB1 (dioxin-        | 3554.293  |
| 7550 | AA425593_at_GI_34147554-S    | EST: zw48f02.r1 Soares total fetus         | 3554.6052 |
| 7551 | RC_AA133167_at_NA_illumina   | EST: zk97d02.s1 Soares pregnant uterus     | 3554.6606 |
| 7552 | Z34820_s_at_NA_illumina      | Calcium channel, voltage-dependent, L      | 3554.7761 |
| 7553 | W67850_s_at_GI_39777595-S    | EST: zd38c02.r1 Soares fetal heart         | 3554.7854 |
| 7554 | L41668_rna1_at_GI_9945333-S  | UDP-Galactose 4 epimerase (GALE) gene      | 3554.862  |
| 7555 | M20786_at_GI_11386142-S      | PLI Alpha-2-plasmin inhibitor (alpha-2-PI) | 3554.9468 |
| 7556 | RC_AA253429_at_GI_37594438-S | Homo sapiens mRNA for OTK18, complete      | 3554.9543 |



|      |                              |                                            |           |
|------|------------------------------|--------------------------------------------|-----------|
| 7557 | X77748_at_GI_4504138-S       | GRM3 Glutamate receptor, metabotropic 3    | 3555.107  |
| 7558 | RC_AA452598_s_at_NA_illumina | Genethonin 1                               | 3555.1172 |
| 7559 | X89576_at_GI_18543372-S      | Putative MT4-MMP protein                   | 3555.199  |
| 7560 | RC_AA426087_at_GI_17505197-S | Homo sapiens mRNA for KIAA0837             | 3555.2004 |
| 7561 | M13699_at_GI_4557484-S       | CP Ceruloplasmin (ferroxidase)             | 3555.2356 |
| 7562 | N40774_at_NA_illumina        | EST: yw81e10.r1 Homo sapiens cDNA          | 3555.2388 |
| 7563 | U05572_s_at_GI_10834967-S    | MANB Mannosidase alpha-B (lysosomal)       | 3555.334  |
| 7564 | AA428403_at_GI_40549453-S    | EST: zv48c04.r1 Soares ovary tumor         | 3555.3506 |
| 7565 | RC_AA599683_at_NA_illumina   | EST: ag10f09.s1 Gessler Wilms tumor        | 3555.3838 |
| 7566 | RC_AA447434_at_GI_7705287-A  | EST: zw93f10.s1 Soares total fetus         | 3555.6191 |
| 7567 | RC_AA034189_at_NA_illumina   | EST: zi06h12.s1 Soares fetal liver spleen  | 3555.7532 |
| 7568 | RC_AA284687_at_NA_illumina   | EST: zt24a02.s1 Soares ovary tumor         | 3555.8206 |
| 7569 | L77567_s_at_GI_21389314-S    | RPS11 Ribosomal protein S11                | 3556.1423 |
| 7570 | RC_AA243281_at_GI_21735555-S | EST: zs13g10.s1 NCI_CGAP_GCB1              | 3556.154  |
| 7571 | X89426_at_GI_13259505-S      | ESM-1 protein                              | 3556.2258 |
| 7572 | RC_AA279980_at_NA_illumina   | EST: zt08e05.s1 NCI_CGAP_GCB1 Homo         | 3556.2512 |
| 7573 | RC_AA521416_at_NA_illumina   | EST: aa68d12.s1 NCI_CGAP_GCB1              | 3556.2664 |
| 7574 | M93255_s_at_NA_illumina      | Friend leukemia virus integration 1        | 3556.2952 |
| 7575 | J02876_at_GI_9257218-S       | FOLATE RECEPTOR BETA                       | 3556.3267 |
| 7576 | AA476517_at_NA_illumina      | Human DNA sequence from clone 431H6        | 3556.387  |
| 7577 | W87936_at_NA_illumina        | EST: zh68d10.r1 Soares fetal liver spleen  | 3556.569  |
| 7578 | M30185_at-2_NA_illumina      | Cholesteryl ester transfer protein, plasma | 3556.6753 |
| 7579 | M30185_at_GI_4557442-S       | CETP Cholesteryl ester transfer protein,   | 3556.6753 |
| 7580 | AA150333_at_GI_32307123-A    | Homo sapiens thyroid hormone receptor      | 3556.7576 |
| 7581 | RC_AA431351_at_NA_illumina   | EST: zw72c12.s1 Soares testis NHT          | 3556.7888 |
| 7582 | RC_AA029423_at_NA_illumina   | EST: ze96c12.s1 Soares fetal heart         | 3556.8672 |
| 7583 | RC_AA453415_at_NA_illumina   | Human DNA sequence from clone 889N15       | 3556.9338 |
| 7584 | RC_AA010211_at_NA_illumina   | EST: zi08f07.s1 Soares fetal liver spleen  | 3557.1042 |
| 7585 | U26446_s_at_NA_illumina      | Protoporphyrinogen oxidase                 | 3557.273  |
| 7586 | AA461426_r_at_NA_illumina    | EST: zx63h02.r1 Soares total fetus         | 3557.3484 |
| 7587 | M98399_s_at_GI_4557418-S     | CD36 CD36 antigen (collagen type I         | 3557.5154 |
| 7588 | RC_AA417067_at_GI_22547147-A | EST: zu13b03.s1 Soares testis NHT Homo     | 3557.5222 |
| 7589 | X62822_at_NA_illumina        | SIAT1 Sialyltransferase 1 (beta-           | 3557.8787 |
| 7590 | AA464386_at_NA_illumina      | EST: zx81f01.r1 Soares ovary tumor         | 3557.932  |
| 7591 | AA203138_at_NA_illumina      | Low density lipoprotein receptor (familial | 3557.9446 |
| 7592 | Z21384_at_NA_illumina        | EST: H. sapiens putatively transcribed     | 3558.146  |
| 7593 | U28369_at_GI_4759091-S       | Semaphorin V mRNA                          | 3558.3516 |
| 7594 | H40732_at_NA_illumina        | EST: yo08d06.r1 Homo sapiens cDNA          | 3558.3982 |
| 7595 | AA453136_at_GI_22538484-S    | Phosphoribosyl pyrophosphate synthetase-   | 3558.4207 |
| 7596 | AFFX-LysX-5_at_NA_illumina   | AFFX-LysX-5_at (endogenous control)        | 3558.595  |
| 7597 | AFFX-LysX-5_at-2_NA_illumina | AFFX-LysX-5_at (miscellaneous control -    | 3558.595  |
| 7598 | AB002372_at_GI_38202245-S    | KIAA0374 gene product                      | 3558.703  |
| 7599 | RC_AA176812_at_NA_illumina   | EST: zp32g12.s1 Stratagene                 | 3558.9688 |

|      |                              |                                           |           |
|------|------------------------------|-------------------------------------------|-----------|
| 7600 | RC_AA489068_at_GI_40556375-S | EST: aa54g05.s1 NCI_CGAP_GCB1             | 3559.2415 |
| 7601 | AA424381_s_at_GI_4503734-S   | EST: zv90g12.r1 Soares NhHMPu S1          | 3559.253  |
| 7602 | RC_AA262250_at_GI_16418350-S | EST: zr70g02.s1 Soares NhHMPu S1          | 3559.3623 |
| 7603 | X75208_at_GI_33598961-S      | HEK2 mRNA for protein tyrosine kinase     | 3559.6323 |
| 7604 | RC_AA598711_at_NA_illumina   | EST: ae49d05.s1 Stratagene lung           | 3559.6726 |
| 7605 | U80811_at_GI_45580697-A      | Lysophosphatidic acid receptor homolog    | 3559.688  |
| 7606 | D45906_at_GI_8051619-A       | LIMK-2                                    | 3559.727  |
| 7607 | AB002337_at_GI_27500171-S    | KIAA0339 gene product                     | 3559.9424 |
| 7608 | AA313891_at_GI_27484425-S    | EST: EST185749 Colon carcinoma (HCC)      | 3560.008  |
| 7609 | U11690_at_GI_24797152-S      | Faciogenital dysplasia (FGD1) mRNA        | 3560.067  |
| 7610 | N75889_f_at_GI_20070261-S    | EST: yw32h06.r1 Homo sapiens cDNA         | 3560.4688 |
| 7611 | U24576_at_GI_7108354-S       | Breast tumor autoantigen mRNA, complete   | 3560.5842 |
| 7612 | AA055247_at_NA_illumina      | EST: zf17h06.r1 Soares fetal heart        | 3560.6113 |
| 7613 | RC_AA425214_at_NA_illumina   | EST: zw48d07.s1 Soares total fetus        | 3560.9727 |
| 7614 | N27054_at_NA_illumina        | EST: yx19f02.r1 Homo sapiens cDNA         | 3561.2654 |
| 7615 | RC_AA428276_at_NA_illumina   | EST: zw18a03.s1 Soares ovary tumor        | 3561.278  |
| 7616 | RC_AA235505_at_NA_illumina   | EST: zt35f12.s1 Soares ovary tumor        | 3561.3347 |
| 7617 | RC_AA435941_at_NA_illumina   | EST: zu01a11.s1 Soares testis NHT Homo    | 3561.3362 |
| 7618 | RC_AA280889_at_NA_illumina   | EST: zs97e06.s1 NCI_CGAP_GCB1             | 3561.3628 |
| 7619 | U51095_at_GI_4502762-S       | CDX1 Caudal type homeo box                | 3561.416  |
| 7620 | AA479146_at_GI_34101267-S    | Zv20e09.r1 Soares NhHMPu S1 Homo          | 3561.525  |
| 7621 | RC_AA406367_at_GI_24462252-S | EST: zv10c03.s1 Soares NhHMPu S1          | 3562.2478 |
| 7622 | U55206_at_GI_4503986-S       | Gamma-glutamyl hydrolase (hGH) mRNA       | 3562.326  |
| 7623 | RC_AA292098_at_GI_13569844-S | EST: zr58g10.s1 Soares NhHMPu S1          | 3562.4634 |
| 7624 | M63167_at_GI_4885060-S       | AKT1 V-akt murine thymoma viral           | 3562.6143 |
| 7625 | RC_AA348910_at_GI_14589873-A | Homo sapiens clone 1 HLA class III        | 3562.6216 |
| 7626 | U25849_at_GI_30090001-A      | ACP1 Acid phosphatase 1, soluble          | 3562.7969 |
| 7627 | U78310_at_GI_22091458-S      | Homo sapiens pescadillo mRNA, complete    | 3562.9585 |
| 7628 | N75120_at_NA_illumina        | EST: yz29f02.r1 Soares multiple sclerosis | 3563.1758 |
| 7629 | RC_AA436608_at_GI_38016201-S | EST: zw55b04.s1 Soares total fetus        | 3563.3318 |
| 7630 | RC_AA456610_at_GI_7657596-S  | EST: zx75b09.s1 Soares ovary tumor        | 3563.8462 |
| 7631 | RC_AA621131_at_GI_26024196-S | EST: af61a05.s1 Soares NhHMPu S1          | 3564.3486 |
| 7632 | X86401_s_at_NA_illumina      | L-arginine:glycine amidinotransferase     | 3564.6768 |
| 7633 | RC_AA243695_at_NA_illumina   | Deoxynucleotidyltransferase, terminal     | 3564.98   |
| 7634 | M29335_at_GI_34419636-S      | MHC class II DO-alpha mRNA, partial cds   | 3564.9998 |
| 7635 | X97261_r_at_NA_illumina      | Metallothionein isoform 1R                | 3565.0518 |
| 7636 | AF002672_at_GI_38195081-A    | Loss of heterozygosity, 11, chromosomal   | 3565.1543 |
| 7637 | W32915_at_NA_illumina        | EST: zc07e04.r1 Soares parathyroid tumor  | 3565.342  |
| 7638 | AA065252_at_GI_40548402-S    | EST: e04501t Testis 5 Homo sapiens        | 3565.7024 |
| 7639 | AA427964_at_NA_illumina      | EST: zw50a08.r1 Soares total fetus        | 3566.11   |
| 7640 | RC_D60017_at_NA_illumina     | EST: Human fetal brain cDNA 3'-end GEN-   | 3566.4893 |
| 7641 | U65092_at_GI_20127458-S      | Melanocyte-specific gene 1 (msg1) mRNA    | 3566.5293 |
| 7642 | U33317_ma1_at_GI_12621917-S  | Defensin 6 (HD-6) gene                    | 3566.5466 |

|      |                               |                                            |           |
|------|-------------------------------|--------------------------------------------|-----------|
| 7643 | RC_AA446926_s_at_NA_illumina  | UDP-Gal:betaGlcNAc beta 1,4-               | 3566.7012 |
| 7644 | RC_AA609597_s_at_NA_illumina  | H.sapiens mRNA for galectin-8              | 3566.7908 |
| 7645 | X72012_at_GI_4557554-S        | ENG Endoglin (Osler-Rendu-Weber            | 3567.0505 |
| 7646 | M26393_s_at_NA_illumina       | Acyl-Coenzyme A dehydrogenase, C-2 to      | 3567.6023 |
| 7647 | RC_AA196633_at_NA_illumina    | Myosin, heavy polypeptide 3, skeletal      | 3567.6616 |
| 7648 | U76343_at_GI_21361580-S       | Human liver GABA transport protein         | 3567.8557 |
| 7649 | AA167268_at_NA_illumina       | EST: zp09b10.r1 Stratagene fetal retina    | 3567.8733 |
| 7650 | AA099995_at_NA_illumina       | Zm65e06.r1 Stratagene fibroblast           | 3567.8748 |
| 7651 | RC_AA481254_at_NA_illumina    | EST: aa35a10.s1 NCI_CGAP_GCB1              | 3567.9543 |
| 7652 | Z46632_at_GI_4505664-S        | PDE4C Phosphodiesterase 4C, cAMP-          | 3568.083  |
| 7653 | X74143_s_at_NA_illumina       | Forkhead (Drosophila)-like 2               | 3568.2349 |
| 7654 | U51333_s_at-2_NA_illumina     | Hexokinase 3 (white cell)                  | 3568.4412 |
| 7655 | U51333_s_at_GI_4504394-S      | HK3 Hexokinase 3 (white cell)              | 3568.4412 |
| 7656 | RC_AA445993_at_NA_illumina    | EST: zw64e03.s1 Soares testis NHT          | 3568.462  |
| 7657 | RC_AA399472_at_NA_illumina    | EST: zt53e07.s1 Soares ovary tumor         | 3568.6113 |
| 7658 | T50299_f_at_NA_illumina       | EST: yb17d10.r1 Homo sapiens cDNA          | 3568.636  |
| 7659 | U19718_at_GI_9665260-A        | MFAP2 Microfibrillar-associated protein 2  | 3568.787  |
| 7660 | M27396_s_at_GI_19718771-A     | ASPARAGINE SYNTHETASE                      | 3568.92   |
| 7661 | AA018887_at_GI_13540520-S     | EST: ze55f04.r1 Soares retina N2b4HR       | 3568.9531 |
| 7662 | M69225_at_NA_illumina         | Bullous pemphigoid antigen (BPAG1)         | 3568.9988 |
| 7663 | M86757_s_at_GI_9845518-S      | S100A7 S100 calcium-binding protein A7     | 3569.1816 |
| 7664 | RC_AA478474_at_NA_illumina    | EST: zx16a07.s1 Soares total fetus         | 3569.2659 |
| 7665 | RC_AA399633_at_NA_illumina    | EST: zt93e07.s1 Soares testis NHT Homo     | 3569.2834 |
| 7666 | T99423_at_GI_27734726-S       | Homo sapiens mRNA for HIRIP3 protein,      | 3569.2915 |
| 7667 | AA263169_at_NA_illumina       | Eukaryotic translation elongation factor 1 | 3569.3108 |
| 7668 | RC_AA128617_at_NA_illumina    | EST: zl15d10.s1 Soares pregnant uterus     | 3569.3728 |
| 7669 | AA147425_s_at_NA_illumina     | Homo sapiens (clone S164) mRNA, 3' end     | 3569.4805 |
| 7670 | AA016186_at_GI_20336326-A     | EST: ze32f10.r1 Soares retina N2b4HR       | 3569.7395 |
| 7671 | RC_AA292305_s_at_NA_illumina  | EST: zt51f07.s1 Soares ovary tumor         | 3569.7883 |
| 7672 | RC_AA398358_at_NA_illumina    | EST: zt61f05.s1 Soares testis NHT Homo     | 3570.1055 |
| 7673 | RC_AA235621_s_at_GI_38569468- | EST: zt36c05.s1 Soares ovary tumor         | 3570.3464 |
| 7674 | RC_AA034910_at_NA_illumina    | Homo sapiens Chromosome 16 BAC clone       | 3570.3608 |
| 7675 | D81936_at_NA_illumina         | EST: Human fetal brain cDNA 5'-end GEN-    | 3570.4211 |
| 7676 | RC_D59550_s_at_NA_illumina    | EST: Human fetal brain cDNA 3'-end GEN-    | 3570.487  |
| 7677 | X66276_s_at_GI_4505294-S      | MYBPC1 Myosin-binding protein C, slow-     | 3571.0977 |
| 7678 | S72370_at_GI_11761614-A       | PC Pyruvate carboxylase                    | 3571.435  |
| 7679 | S72370_at-2_NA_illumina       | Pyruvate carboxylase                       | 3571.435  |
| 7680 | RC_AA046704_at_GI_28872785-S  | EST: zk62b07.s1 Soares pregnant uterus     | 3571.4526 |
| 7681 | U61500_at-2_NA_illumina       | ES1 (zebrafish) protein, human homolog of  | 3571.6323 |
| 7682 | U61500_at_NA_illumina         | GT334 protein (GT334) gene mRNA            | 3571.6323 |
| 7683 | AA400226_at_NA_illumina       | EST: zu64h07.r1 Soares testis NHT Homo     | 3571.6638 |
| 7684 | R77869_at_GI_5453572-S        | EST: yi77f04.r1 Homo sapiens cDNA clone    | 3571.9807 |
| 7685 | RC_AA029362_at_NA_illumina    | EST: zk12e11.s1 Soares pregnant uterus     | 3572.1443 |

|      |                              |                                             |           |
|------|------------------------------|---------------------------------------------|-----------|
| 7686 | AA452332_at_GI_19923392-S    | Homo sapiens chromosome 1 atrophin-1        | 3572.264  |
| 7687 | N31127_at_NA_illumina        | EST: yx52e01.r1 Homo sapiens cDNA           | 3572.7292 |
| 7688 | AA095722_at_GI_21361775-S    | EST: I5700.seq.F Fetal heart, Lambda        | 3572.8435 |
| 7689 | C18029_at_NA_illumina        | Human tumor susceptibility protein          | 3573.0222 |
| 7690 | U01062_at_GI_4504794-S       | ITPR3 Inositol 1,4,5-triphosphate receptor, | 3573.0457 |
| 7691 | RC_AA127964_at_GI_6005909-S  | EST: zl13g07.s1 Soares pregnant uterus      | 3573.206  |
| 7692 | M87860_at_GI_5729902-S       | GALECTIN-2                                  | 3573.3433 |
| 7693 | U78581_s_at_NA_illumina      | Human type I phosphatidylinositol-4-        | 3573.442  |
| 7694 | W07666_at_NA_illumina        | EST: zb04e04.r1 Soares fetal lung           | 3573.6492 |
| 7695 | AA093834_at_GI_21361533-S    | EST: cl1190.seq.F Fetal heart, Lambda       | 3573.87   |
| 7696 | W28151_at_NA_illumina        | EST: 43f5 Human retina cDNA randomly        | 3574.0442 |
| 7697 | W24957_at_NA_illumina        | EST: zb65h10.r1 Soares fetal lung           | 3574.2224 |
| 7698 | RC_AA258032_at_NA_illumina   | EST: zs76a11.s1 NCI_CGAP_GCB1               | 3574.4333 |
| 7699 | N45083_at_NA_illumina        | EST: yv24g03.r1 Homo sapiens cDNA           | 3575.1335 |
| 7700 | RC_AA293266_at_GI_20336299-S | EST: zt28b08.s1 Soares ovary tumor          | 3575.1755 |
| 7701 | S75213_s_at_NA_illumina      | PDE4A Phosphodiesterase 4A, cAMP-           | 3575.2024 |
| 7702 | RC_AA520996_at_GI_7662265-S  | EST: aa70c08.s1 NCI_CGAP_GCB1               | 3575.2148 |
| 7703 | M60047_at_NA_illumina        | Heparin binding protein (HBp17) mRNA        | 3575.2827 |
| 7704 | AA234687_at_GI_40255259-S    | EST: zs39c07.r1 Soares NhHMPu S1            | 3575.307  |
| 7705 | U04840_at_GI_6031188-A       | Onconeural ventral antigen-1 (Nova-1)       | 3575.6287 |
| 7706 | RC_AA303088_at_NA_illumina   | EST: EST12934 Uterus tumor I Homo           | 3575.7844 |
| 7707 | RC_AA257074_at_GI_21265079-S | EST: zr82c03.s1 Soares NhHMPu S1            | 3575.7932 |
| 7708 | RC_AA418394_at_GI_40807356-S | EST: zv92e06.s1 Soares NhHMPu S1            | 3576.0535 |
| 7709 | RC_AA482263_at_NA_illumina   | EST: ab15g10.s1 Stratagene lung             | 3576.4854 |
| 7710 | RC_AA620323_at_GI_38045945-A | Ubiquitin-activating enzyme E1C             | 3576.521  |
| 7711 | RC_AA019064_at_NA_illumina   | EST: ze56d07.s1 Soares retina N2b4HR        | 3576.6682 |
| 7712 | W45259_at_NA_illumina        | EST: zc24e10.r1 Soares senescent            | 3576.6797 |
| 7713 | AA478688_at_NA_illumina      | EST: zv09a02.r1 Soares NhHMPu S1            | 3576.7166 |
| 7714 | U58048_at_GI_4506138-S       | PRSM1 Metallopeptidase 1 (33 kD)            | 3576.731  |
| 7715 | AA093619_s_at_GI_14165285-S  | Homo sapiens mRNA for KIAA0717              | 3576.8284 |
| 7716 | RC_AA156112_at_NA_illumina   | EST: zo45f07.s1 Stratagene endothelial      | 3577.118  |
| 7717 | M12963_s_at_NA_illumina      | ADH1 Alcohol dehydrogenase 1 (class I),     | 3577.245  |
| 7718 | RC_AA437225_at_GI_24308375-S | EST: zv54b11.s1 Soares testis NHT Homo      | 3577.3308 |
| 7719 | W26928_at_NA_illumina        | Homo sapiens mRNA for ARPP-19 protein       | 3577.5278 |
| 7720 | L36531_at-2_NA_illumina      | Integrin, alpha 8                           | 3577.58   |
| 7721 | L36531_at_GI_37551030-S      | Integrin alpha 8 subunit mRNA, 3' end       | 3577.58   |
| 7722 | X78932_f_at_NA_illumina      | H.sapiens HZF9 mRNA for zinc finger         | 3578.0073 |
| 7723 | D26070_at_GI_10835022-S      | Type 1 inositol 1,4,5-trisphosphate         | 3578.2295 |
| 7724 | AA216017_at_NA_illumina      | EST: hp0234.seq.F Fetal heart, Lambda       | 3578.3425 |
| 7725 | AB002366_at_GI_37540466-S    | KIAA0368 gene, partial cds                  | 3578.5674 |
| 7726 | AA247987_s_at_NA_illumina    | Homo sapiens SKB1Hs mRNA, complete          | 3578.7349 |
| 7727 | L44403_at_GI_34787408-S      | EST: Homo sapiens thymus mRNA               | 3578.749  |
| 7728 | RC_AA461319_at_NA_illumina   | EST: zx65c07.s1 Soares total fetus          | 3578.808  |

|      |                              |                                             |           |
|------|------------------------------|---------------------------------------------|-----------|
| 7729 | RC_AA432107_at_NA_illumina   | EST: zw89f01.s1 Soares total fetus          | 3578.8843 |
| 7730 | U85707_at-2_NA_illumina      | Meis1 (mouse) homolog                       | 3578.9573 |
| 7731 | U85707_at_GI_45006902-S      | Leukemogenic homolog protein (MEIS1)        | 3578.9573 |
| 7732 | M29276_s_at_NA_illumina      | N-acetylgalactosaminidase, alpha-           | 3579.0276 |
| 7733 | H82179_at_NA_illumina        | Yv78f04.r1 Homo sapiens cDNA clone          | 3579.1816 |
| 7734 | AA404447_at_NA_illumina      | Homo sapiens polyadenylate binding          | 3579.236  |
| 7735 | U36500_at_GI_21361373-S      | Lymphoid-specific SP100 homolog             | 3579.533  |
| 7736 | H06773_at_GI_33186924-S      | EST: yl83e03.r1 Homo sapiens cDNA           | 3579.6145 |
| 7737 | RC_AA233957_at_NA_illumina   | EST: zr27e04.s1 Stratagene NT2 neuronal     | 3579.6926 |
| 7738 | AA112222_at_GI_30794221-S    | EST: zn60g08.r1 Stratagene muscle           | 3579.7688 |
| 7739 | C01527_at_GI_29171733-S      | EST: HUMGS0008522, Human Gene               | 3579.979  |
| 7740 | U01147_at_GI_38679953-A      | ABR Active BCR-related gene                 | 3580.0952 |
| 7741 | H20443_at_NA_illumina        | Low density lipoprotein receptor (familial  | 3580.3337 |
| 7742 | RC_AA477641_at_GI_21361102-S | Solute carrier family 25 (mitochondrial     | 3580.4888 |
| 7743 | D13705_s_at_GI_13435387-S    | Fatty acids omega-hydroxylase               | 3580.5732 |
| 7744 | AA253129_at_GI_16306579-S    | EST: zr52e12.r1 Soares NhHMPu S1            | 3580.579  |
| 7745 | L01664_at_NA_illumina        | CLC Charot-Leyden crystal protein           | 3580.8303 |
| 7746 | AA017469_at_GI_7661567-S     | EST: ze38f11.r1 Soares retina N2b4HR        | 3580.8413 |
| 7747 | M64082_at_GI_4503754-S       | FMO1 Flavin-containing monooxygenase 1      | 3580.893  |
| 7748 | D64110_at_GI_28872721-S      | Tob family                                  | 3581.8823 |
| 7749 | RC_AA136670_at_NA_illumina   | Human DNA sequence from clone 465N24        | 3581.9092 |
| 7750 | AA371121_at_NA_illumina      | EST82873 Prostate gland I Homo sapiens      | 3581.9692 |
| 7751 | RC_AA421052_at_GI_5031608-S  | Homo sapiens branched chain alpha-          | 3582.3547 |
| 7752 | J05008_at_NA_illumina        | EDN1 Endothelin 1 {alternative products}    | 3582.4607 |
| 7753 | AA129547_at_GI_42741654-S    | EST: zn83f01.r1 Stratagene lung             | 3582.7607 |
| 7754 | H38727_at_NA_illumina        | Ribosomal protein L37                       | 3583.0513 |
| 7755 | RC_AA446858_at_GI_23592235-S | EST: zw84h11.s1 Soares total fetus          | 3583.0767 |
| 7756 | RC_AA430151_at_NA_illumina   | EST: zw59h05.s1 Soares total fetus          | 3583.29   |
| 7757 | D21089_at_GI_20127459-S      | XPC Xeroderma pigmentosum,                  | 3583.3376 |
| 7758 | X83412_at-2_NA_illumina      | H.sapiens B1 mRNA for mucin                 | 3583.5195 |
| 7759 | X83412_at_NA_illumina        | B1 mRNA for mucin                           | 3583.5195 |
| 7760 | RC_AA058683_at_NA_illumina   | Homo sapiens clone 23765 mRNA               | 3583.719  |
| 7761 | RC_AA292694_at_NA_illumina   | EST: zt21e10.s1 Soares ovary tumor          | 3583.949  |
| 7762 | RC_AA424148_at_NA_illumina   | EST: zv81c03.s1 Soares total fetus          | 3584.056  |
| 7763 | R33961_at_NA_illumina        | EST: yh74b06.r1 Homo sapiens cDNA           | 3584.0857 |
| 7764 | AA033508_s_at_NA_illumina    | EST: HPLA_CCLEE_40f6br HPLA CCLee           | 3584.5273 |
| 7765 | RC_AA026280_at_NA_illumina   | EST: ze91d10.s1 Soares fetal heart          | 3584.5735 |
| 7766 | R97361_at_NA_illumina        | Eukaryotic translation initiation factor 3, | 3584.6995 |
| 7767 | RC_AA400768_at_NA_illumina   | EST: zt71c01.s1 Soares testis NHT Homo      | 3584.9185 |
| 7768 | U62961_at_NA_illumina        | Succinyl CoA:3-oxoacid CoA transferase      | 3584.9236 |
| 7769 | U36759_s_at_GI_19923720-S    | Pre-T cell receptor alpha-type chain        | 3585.113  |
| 7770 | U37283_at_NA_illumina        | Microfibril-associated glycoprotein-2       | 3585.1746 |
| 7771 | T68510_at_NA_illumina        | EST: yc42e04.r1 Homo sapiens cDNA           | 3585.2844 |

|      |                              |                                             |           |
|------|------------------------------|---------------------------------------------|-----------|
| 7772 | L41349_at_GI_33469938-A      | PLCB4 Phospholipase C, beta 4               | 3585.5361 |
| 7773 | RC_AA427735_at_NA_illumina   | EST: zw30g09.s1 Soares ovary tumor          | 3585.7095 |
| 7774 | U95299_s_at_NA_illumina      | Notch (Drosophila) homolog 4                | 3585.7424 |
| 7775 | AA188921_at_NA_illumina      | Homo sapiens KE04p mRNA, complete           | 3585.8013 |
| 7776 | RC_AA460848_at_GI_12232478-S | EST: zx64h07.s1 Soares total fetus          | 3586.3015 |
| 7777 | U82275_at_GI_5803067-S       | Immunoglobulin-like transcript 1 mRNA       | 3586.5107 |
| 7778 | W61059_at_NA_illumina        | Platelet-activating factor acetylhydrolase, | 3587.042  |
| 7779 | U22662_at_GI_5031892-S       | Nuclear orphan receptor LXR-alpha mRNA      | 3587.0552 |
| 7780 | AA451992_at_NA_illumina      | EST: zv75b06.r1 Soares total fetus          | 3587.0642 |
| 7781 | Z11933_at-2_NA_illumina      | H.sapiens mRNA for N-Oct 3, N-Oct5a,        | 3587.4355 |
| 7782 | Z11933_at_NA_illumina        | N-Oct 3, N-Oct5a, and N-Oct 5b proteins     | 3587.4355 |
| 7783 | RC_AA258559_at_GI_31881762-S | EST: zr60e06.s1 Soares NhHMPu S1            | 3587.5718 |
| 7784 | J04813_s_at_NA_illumina      | Cytochrome P450, subfamily IIIA             | 3587.715  |
| 7785 | RC_AA425856_at_NA_illumina   | Homo sapiens mRNA for KIAA0908              | 3587.8425 |
| 7786 | J05096_rna1_at_GI_4502270-S  | Na,K-ATPase subunit alpha 2 (ATP1A2)        | 3588.0132 |
| 7787 | W56875_at_NA_illumina        | EST: zc01e01.r1 Soares parathyroid tumor    | 3588.2803 |
| 7788 | D80012_at_GI_24307888-S      | KIAA0190 gene, partial cds                  | 3588.3171 |
| 7789 | AA009602_at_NA_illumina      | EST: ze82e10.r1 Soares fetal heart          | 3588.5483 |
| 7790 | H89575_s_at_NA_illumina      | Forkhead (Drosophila)-like 7                | 3588.607  |
| 7791 | RC_AA426401_at_NA_illumina   | EST: zv05g02.s1 Soares NhHMPu S1            | 3588.7788 |
| 7792 | RC_C15162_s_at_NA_illumina   | EST: Human fetal brain cDNA 3'-end GEN-     | 3588.969  |
| 7793 | RC_AA216589_at_GI_41393588-S | EST: zq94e07.s1 Stratagene NT2              | 3589.386  |
| 7794 | RC_AA447223_at_NA_illumina   | EST: zw91h04.s1 Soares total fetus          | 3589.4666 |
| 7795 | RC_AA496805_at_GI_34335250-A | EST: ae33h05.s1 Gessler Wilms tumor         | 3589.5837 |
| 7796 | U89916_at_GI_38570070-A      | Putative OSP like protein mRNA, partial     | 3589.6143 |
| 7797 | L10665_at_GI_4504042-A       | GNAL Guanine nucleotide binding protein     | 3589.7    |
| 7798 | L10665_at-2_NA_illumina      | Guanine nucleotide binding protein (G       | 3589.7    |
| 7799 | AA112799_at_GI_21359948-S    | EST: zn62h02.r1 Stratagene muscle           | 3589.7334 |
| 7800 | X68149_at_GI_14589867-A      | BLR1 Burkitt lymphoma receptor 1, GTP-      | 3590.0022 |
| 7801 | AA496215_at_GI_24475740-S    | EST: zx70c12.r1 Soares total fetus          | 3590.2808 |
| 7802 | W59939_at_NA_illumina        | EST: zd27a10.r1 Soares fetal heart          | 3590.2942 |
| 7803 | D79601_f_at_NA_illumina      | EST: Human aorta cDNA 5'-end GEN-           | 3590.503  |
| 7804 | AA393755_at_NA_illumina      | EST: zt78c02.r1 Soares testis NHT Homo      | 3590.5276 |
| 7805 | RC_AA281770_at_NA_illumina   | Seven in absentia (Drosophila) homolog 1    | 3590.825  |
| 7806 | AA070351_at_NA_illumina      | Zm69a09.r1 Stratagene neuroepithelium       | 3590.8489 |
| 7807 | D31417_at_NA_illumina        | EST: Human fetal-lung cDNA 5'-end           | 3590.9187 |
| 7808 | RC_AA477459_at_NA_illumina   | EST: zu44c08.s1 Soares ovary tumor          | 3591.412  |
| 7809 | AFFX-HUMTFRR/M11507_M_at-    | Transferrin receptor (p90, CD71)            | 3591.4346 |
| 7810 | AFFX-                        | AFFX-HUMTFRR/M11507_M_at                    | 3591.4346 |
| 7811 | RC_D20888_at_NA_illumina     | EST: Human HL60 3'directed Mbol cDNA,       | 3591.9949 |
| 7812 | AA464918_at_NA_illumina      | EST: aa92h11.r1 Stratagene fetal retina     | 3592.0078 |
| 7813 | L31801_at_GI_19923752-S      | SLC16A1 Solute carrier family 16            | 3592.0342 |
| 7814 | M18737_rna1_at_GI_6996012-S  | GJA1P1 gene extracted from Human            | 3592.1147 |

|      |                                |                                             |           |
|------|--------------------------------|---------------------------------------------|-----------|
| 7815 | M95178_at_GI_12025669-S        | ALPHA-ACTININ 1, CYTOSKELETAL               | 3592.169  |
| 7816 | RC_AA497049_at_NA_illumina     | EST: aa42c02.s1 Soares NhHMPu S1            | 3592.2783 |
| 7817 | X54925_at_GI_13027798-S        | MMP1 Matrix metalloproteinase 1             | 3592.5422 |
| 7818 | AB000467_at_GI_37540621-S      | mRNA, clone RES4-25, partial cds            | 3593.0376 |
| 7819 | AA151544_at_NA_illumina        | Matrix metalloproteinase 21                 | 3593.0693 |
| 7820 | RC_AA452130_at_NA_illumina     | EST: zx15d05.s1 Soares total fetus          | 3593.1877 |
| 7821 | D62600_s_at_NA_illumina        | EST: Human aorta cDNA 5'-end GEN-           | 3593.5325 |
| 7822 | HG1327-HT1327_s_at_NA_illumina | Statherin                                   | 3593.8943 |
| 7823 | RC_AA621340_at_GI_39930468-S   | EST: af85c04.s1 Soares testis NHT Homo      | 3594.0134 |
| 7824 | AA334630_at_NA_illumina        | EST38874 Embryo, 9 week Homo sapiens        | 3594.0193 |
| 7825 | RC_AA453794_at_GI_30425552-S   | EST: aa19f07.s1 Soares NhHMPu S1            | 3594.0432 |
| 7826 | RC_AA418420_at_GI_8922595-S    | EST: zv92h07.s1 Soares NhHMPu S1            | 3594.1062 |
| 7827 | RC_AA456598_at_GI_31377583-S   | EST: zx75a05.s1 Soares ovary tumor          | 3594.232  |
| 7828 | AA454462_at_GI_22507392-S      | EST: zw28f11.r1 Soares ovary tumor          | 3594.385  |
| 7829 | Y09616_at-2_NA_illumina        | Intestinal carboxylesterase; liver          | 3594.5227 |
| 7830 | Y09616_at_GI_37622886-A        | Carboxylesterase (hCE-2) mRNA               | 3594.5227 |
| 7831 | W60268_at_NA_illumina          | EST: zd29g01.r1 Soares fetal heart          | 3594.563  |
| 7832 | D10216_s_at_NA_illumina        | POU domain, class 1, transcription factor 1 | 3594.7402 |
| 7833 | D82373_at_GI_38788009-S        | Squamous cell carcinoma antigen             | 3594.7783 |
| 7834 | AB002375_at_GI_41281419-S      | KIAA0377 gene product                       | 3594.8918 |
| 7835 | AA227635_at_NA_illumina        | Zr98h06.r1 NCI_CGAP_GCB1 Homo               | 3594.9834 |
| 7836 | AA083572_at_GI_33946328-S      | V-ral simian leukemia viral oncogene        | 3595.0564 |
| 7837 | N41486_at_GI_21361381-S        | EST: yy05c12.r1 Homo sapiens cDNA           | 3595.7031 |
| 7838 | X81438_at_GI_21536422-A        | AMPH Amphiphysin (128kD autoantigen)        | 3595.8489 |
| 7839 | L38486_at_GI_23111004-S        | MFAP4 Microfibrillar-associated protein 4   | 3596.447  |
| 7840 | U15460_at_GI_18375640-S        | BZip protein B-ATF mRNA                     | 3596.7915 |
| 7841 | RC_AA252893_at_NA_illumina     | EST: zr76e01.s1 Soares NhHMPu S1            | 3596.904  |
| 7842 | AA298180_at_NA_illumina        | EST: EST113862 Bone VII Homo sapiens        | 3596.9473 |
| 7843 | U56814_at_GI_4826697-S         | DNase1-Like III protein (DNAS1L3) mRNA      | 3596.9666 |
| 7844 | U56814_at-2_NA_illumina        | Deoxyribonuclease I-like 3                  | 3596.9666 |
| 7845 | M19650_s_at_NA_illumina        | CNP 2',3'-cyclic nucleotide 3'              | 3597.322  |
| 7846 | U43203_s_at_GI_31881814-S      | TTF1 Transcription termination factor, RNA  | 3597.4421 |
| 7847 | H13458_s_at_GI_21361636-S      | EST: yj15a05.r1 Homo sapiens cDNA           | 3597.6968 |
| 7848 | U60800_at_GI_33942063-S        | Semaphorin (CD100) mRNA                     | 3597.7024 |
| 7849 | C06268_at_NA_illumina          | EST: similar to none, mRNA sequence.        | 3597.7356 |
| 7850 | RC_AA496999_at_GI_41327778-S   | EST: ae32e11.s1 Gessler Wilms tumor         | 3597.855  |
| 7851 | RC_AA458904_at_GI_31543816-S   | EST: aa26e01.s1 NCI_CGAP_GCB1               | 3597.946  |
| 7852 | RC_AA149530_at_NA_illumina     | Interferon regulatory factor 3              | 3597.951  |
| 7853 | RC_AA521333_at_NA_illumina     | EST: aa68f12.s1 NCI_CGAP_GCB1 Homo          | 3598.0256 |
| 7854 | D89077_at_GI_5803170-S         | Src-like adapter protein mRNA               | 3598.4006 |
| 7855 | T40145_at_NA_illumina          | EST: ya16c07.r3 Homo sapiens cDNA           | 3598.4204 |
| 7856 | AA215404_at_NA_illumina        | EST: zr94g11.r1 NCI_CGAP_GCB1 Homo          | 3598.795  |
| 7857 | AA092376_at_NA_illumina        | 15 kDa selenoprotein                        | 3598.8542 |

|      |                                |                                            |           |
|------|--------------------------------|--------------------------------------------|-----------|
| 7858 | RC_AA402622_at_NA_illumina     | EST: zu47g07.s1 Soares ovary tumor         | 3599.0974 |
| 7859 | HG4490-HT4876_f_at_NA_illumina | Proline-Rich Protein Prb4, Allele          | 3599.2227 |
| 7860 | AB002342_at_NA_illumina        | KIAA0344 gene product                      | 3599.2473 |
| 7861 | U00943_at_NA_illumina          | Clone A9A2BRB2 (CAC)n/(GTG)n repeat-       | 3599.353  |
| 7862 | U00943_at-2_NA_illumina        | Human clone A9A2BRB2 (CAC)n/(GTG)n         | 3599.353  |
| 7863 | RC_AA431464_at_GI_10864068-S   | EST: zw70g08.s1 Soares testis NHT          | 3599.4585 |
| 7864 | D30756_at_NA_illumina          | KIAA0108 gene                              | 3599.4597 |
| 7865 | M74088_s_at_NA_illumina        | APC Adenomatosis polyposis coli            | 3599.5684 |
| 7866 | U31556_at_NA_illumina          | E2F5 E2F transcription factor 5, p130-     | 3599.89   |
| 7867 | RC_AA393827_at_GI_42734348-S   | EST: zv64h02.s1 Soares total fetus         | 3600.0134 |
| 7868 | Z19813_at_NA_illumina          | CDW52 antigen (CAMPATH-1 antigen)          | 3600.1223 |
| 7869 | RC_AA479922_at_NA_illumina     | EST: zw44e03.s1 Soares total fetus         | 3600.341  |
| 7870 | RC_AA148859_s_at_GI_19923660-  | EST: zo01d11.s1 Stratagene colon           | 3600.8157 |
| 7871 | AFFX-BioDn-3_at_NA_illumina    | AFFX-BioDn-3_at (endogenous control)       | 3600.922  |
| 7872 | AFFX-BioDn-3_at-2_NA_illumina  | AFFX-BioDn-3_at (miscellaneous control -   | 3600.922  |
| 7873 | W55958_at_GI_5901997-S         | EST: zd13e09.r1 Soares fetal heart         | 3602.1245 |
| 7874 | RC_AA620582_at_GI_38570148-S   | EST: ae60g01.s1 Stratagene lung            | 3602.1875 |
| 7875 | AA418616_at_NA_illumina        | Homo sapiens PNG pseudogene,               | 3602.6672 |
| 7876 | RC_AA257068_at_NA_illumina     | EST: zr82b05.s1 Soares NhHMPu S1           | 3602.6797 |
| 7877 | U90908_at_GI_34013589-S        | Clones 23549 and 23762 mRNA                | 3603.082  |
| 7878 | U90908_at-2_NA_illumina        | Human clones 23549 and 23762 mRNA,         | 3603.082  |
| 7879 | L42621_at_GI_28827775-S        | Ly-9 mRNA                                  | 3603.2175 |
| 7880 | L42621_at-2_NA_illumina        | Lymphocyte antigen 9                       | 3603.2175 |
| 7881 | Z26653_at_GI_28559087-S        | LAMA2 Laminin, alpha 2 (merosin,           | 3603.3188 |
| 7882 | H30778_at_NA_illumina          | EST: yo79e01.r1 Homo sapiens cDNA          | 3603.3416 |
| 7883 | AA112267_at_GI_39780587-S      | Ferritin, heavy polypeptide 1              | 3603.427  |
| 7884 | AF002224_at_GI_19718761-A      | Angelman Syndrome Gene, E6-AP              | 3603.447  |
| 7885 | RC_AA421473_s_at_NA_illumina   | EST: zu06c11.s1 Soares testis NHT Homo     | 3604.074  |
| 7886 | AA428025_at_GI_20336476-S      | Transforming growth factor beta-stimulated | 3604.1677 |
| 7887 | RC_AA609873_at_GI_14277701-A   | EST: af08c07.s1 Soares testis NHT Homo     | 3604.2288 |
| 7888 | W44533_at_NA_illumina          | Dual specificity phosphatase 1             | 3604.4805 |
| 7889 | Z19702_at_NA_illumina          | EST: H. sapiens putatively transcribed     | 3604.584  |
| 7890 | RC_AA243167_at_GI_27369496-S   | Carbohydrate (chondroitin 6/keratan)       | 3604.9055 |
| 7891 | RC_AA150683_at_NA_illumina     | EST: zl47a01.s1 Soares pregnant uterus     | 3604.9749 |
| 7892 | H87671_at_NA_illumina          | Yw15d02.r1 Homo sapiens cDNA clone         | 3605.0076 |
| 7893 | RC_AA451907_at_NA_illumina     | Homo sapiens Opa-interacting protein       | 3605.7344 |
| 7894 | RC_AA609831_at_GI_32306512-S   | EST: ae62e05.s1 Stratagene lung            | 3605.9697 |
| 7895 | L23134_s_at_NA_illumina        | Homo sapiens metase (MET-1) mRNA,          | 3605.981  |
| 7896 | AA070545_at_NA_illumina        | Zm70c03.r1 Stratagene neuroepithelium      | 3606.0935 |
| 7897 | AA115572_s_at_GI_40288289-S    | EST: zl05d11.r1 Soares pregnant uterus     | 3606.179  |
| 7898 | RC_AA410986_at_NA_illumina     | EST: zv03a05.s1 Soares NhHMPu S1           | 3606.335  |
| 7899 | RC_AA262351_f_at_NA_illumina   | EST: zr44g03.s1 Soares NhHMPu S1           | 3606.5295 |
| 7900 | T35529_at_NA_illumina          | KIAA0446 gene product                      | 3607.5388 |



|      |                                |                                           |           |
|------|--------------------------------|-------------------------------------------|-----------|
| 7901 | RC_AA155763_at_NA_illumina     | EST: zo52g12.s1 Stratagene pancreas       | 3607.5667 |
| 7902 | RC_AA521201_at_NA_illumina     | EST: aa74c10.s1 NCI_CGAP_GCB1             | 3607.7505 |
| 7903 | RC_AA004701_at_NA_illumina     | EST: zh93e03.s1 Soares fetal liver spleen | 3607.894  |
| 7904 | C06244_at_NA_illumina          | Homo sapiens C21orf4 mRNA, complete       | 3608.3196 |
| 7905 | AA405335_at_NA_illumina        | EST: zu13g06.r1 Soares testis NHT Homo    | 3608.3948 |
| 7906 | U25997_at_GI_4507264-S         | Stanniocalcin precursor (STC) mRNA        | 3608.5068 |
| 7907 | HG1034-HT1034_f_at_NA_illumina | Atpase, Na+/K+ Transporting, Alpha 1      | 3608.5757 |
| 7908 | RC_AA290991_s_at_NA_illumina   | EST: zt18g10.s1 Soares ovary tumor        | 3608.8765 |
| 7909 | L27080_at_GI_5174534-S         | Melanocortin 5 receptor (MC5R) gene       | 3608.9998 |
| 7910 | AA291786_s_at_GI_19528662-A    | Homo sapiens mRNA for Fe65L2,             | 3609.1692 |
| 7911 | X17025_at_GI_40018632-S        | Homolog of yeast IPP isomerase            | 3609.339  |
| 7912 | X76648_at_GI_4504024-S         | GLRX Glutaredoxin (thioltransferase)      | 3609.394  |
| 7913 | AA382383_f_at_NA_illumina      | EST: EST95583 Testis I Homo sapiens       | 3609.699  |
| 7914 | AA227813_at_GI_7706317-S       | EST: zr56d01.r1 Soares NhHMPu S1          | 3609.7524 |
| 7915 | U90902_at_NA_illumina          | Clone 23612 mRNA sequence                 | 3609.8286 |
| 7916 | RC_AA461554_at_GI_7661817-S    | EST: zx62c03.s1 Soares total fetus        | 3610.1355 |
| 7917 | AA234817_at_GI_31343528-S      | Zs37c08.r1 Soares_NhHMPu_S1 Homo          | 3610.2976 |
| 7918 | RC_AA234743_at_NA_illumina     | EST: zs38b09.s1 Soares NhHMPu S1          | 3610.3142 |
| 7919 | AA143019_at_GI_19593984-S      | EST: zl48a05.r1 Soares pregnant uterus    | 3610.3206 |
| 7920 | AA055916_s_at_NA_illumina      | Homo sapiens mRNA from chromosome         | 3610.5186 |
| 7921 | AA487015_s_at_GI_37551306-S    | EST: ab24f09.r1 Stratagene lung           | 3610.559  |
| 7922 | AA298981_at_GI_19743802-S      | Homo sapiens UP50 mRNA, complete cds      | 3610.575  |
| 7923 | U49516_at_NA_illumina          | HTR2C 5-hydroxytryptamine (serotonin)     | 3611.207  |
| 7924 | U82169_at-2_NA_illumina        | Frizzled (Drosophila) homolog 9           | 3611.8494 |
| 7925 | U82169_at_GI_4503834-S         | Frizzled homolog (FZD3) mRNA              | 3611.8494 |
| 7926 | RC_AA460024_at_GI_19923278-S   | Semaphorin W                              | 3612.136  |
| 7927 | RC_AA435720_f_at_NA_illumina   | Homo sapiens (clone ch13lambda7) alpha-   | 3612.1575 |
| 7928 | RC_AA481037_at_GI_8567387-S    | EST: aa29b06.s1 NCI_CGAP_GCB1             | 3612.364  |
| 7929 | U28687_at_GI_23510453-S        | ZNF157 Zinc finger protein 157 (HZF22)    | 3612.815  |
| 7930 | U28687_at-2_NA_illumina        | Zinc finger protein 157 (HZF22)           | 3612.815  |
| 7931 | AA133359_at_GI_42660445-S      | EST: zl17d12.r1 Soares pregnant uterus    | 3612.8477 |
| 7932 | RC_AA402613_at_NA_illumina     | EST: zu49c05.s1 Soares ovary tumor        | 3613.0168 |
| 7933 | RC_AA159322_at_NA_illumina     | EST: zo61f08.s1 Stratagene pancreas       | 3613.0513 |
| 7934 | R22139_at_NA_illumina          | EST: yh25b11.r1 Homo sapiens cDNA         | 3613.0635 |
| 7935 | RC_AA005262_at_GI_11559926-S   | Homo sapiens DNA sequence from PAC        | 3613.4326 |
| 7936 | R67751_at_NA_illumina          | EST: yi28e02.r1 Homo sapiens cDNA         | 3613.4426 |
| 7937 | U40343_at_GI_39995073-A        | CDK inhibitor p19INK4d mRNA               | 3614.1018 |
| 7938 | U79255_at_GI_22035549-S        | X11 protein mRNA, partial cds             | 3614.194  |
| 7939 | R81437_at_NA_illumina          | EST: yj02b08.r1 Homo sapiens cDNA         | 3614.4548 |
| 7940 | AA195136_at_NA_illumina        | Zr34d05.r1 Soares NhHMPu S1 Homo          | 3614.7056 |
| 7941 | RC_AA253412_at_NA_illumina     | EST: zr77d04.s1 Soares NhHMPu S1          | 3614.741  |
| 7942 | R15917_at_NA_illumina          | Homo sapiens clone 24629 mRNA             | 3614.7449 |
| 7943 | RC_AA258130_at_NA_illumina     | EST: zs35f03.s1 NCI_CGAP_GCB1 Homo        | 3615.427  |

|      |                                |                                             |           |
|------|--------------------------------|---------------------------------------------|-----------|
| 7944 | RC_AA291293_at_GI_38604072-S   | EST: zs18d11.s1 NCI_CGAP_GCB1               | 3615.6624 |
| 7945 | W67899_at_NA_illumina          | KIAA0405 gene product                       | 3615.7246 |
| 7946 | AA249334_at_NA_illumina        | J0312.seq.F Human fetal heart, Lambda       | 3615.9045 |
| 7947 | RC_AA180488_at_NA_illumina     | EST: zp50e03.s1 Stratagene HeLa cell s3     | 3616.1685 |
| 7948 | R86224_at_NA_illumina          | Human mRNA for KIAA0143 gene, partial       | 3616.4714 |
| 7949 | AA127696_at_NA_illumina        | EST: zk89d09.r1 Soares pregnant uterus      | 3616.6396 |
| 7950 | RC_AA223874_at_GI_21735583-A   | Human BAC clone RG385F02 from 7p15          | 3616.6748 |
| 7951 | L07765_at_GI_16905523-S        | CES2 Carboxylestease 2 (liver)              | 3616.733  |
| 7952 | J03756_at_GI_20809253-A        | SOMATOTROPIN PRECURSOR                      | 3616.9429 |
| 7953 | M84424_at_NA_illumina          | CATHEPSIN E PRECURSOR                       | 3617.0088 |
| 7954 | AA030042_at_GI_32698743-S      | EST: zk08g04.r1 Soares pregnant uterus      | 3617.3137 |
| 7955 | RC_D20383_at_NA_illumina       | EST: Human HL60 3'directed MboI cDNA,       | 3617.624  |
| 7956 | AFFX-DapX-5_at_NA_illumina     | AFFX-DapX-5_at (endogenous control)         | 3617.8987 |
| 7957 | AFFX-DapX-5_at-2_NA_illumina   | AFFX-DapX-5_at (miscellaneous control -     | 3617.8987 |
| 7958 | M16937_at_GI_25121962-S        | Homeo box c1 protein, mRNA                  | 3617.9167 |
| 7959 | AA458761_i_at_NA_illumina      | Transcription factor AP-2 alpha (activating | 3618.7625 |
| 7960 | U17280_at_GI_4507250-S         | STAR Steroidogenic acute regulatory         | 3618.955  |
| 7961 | U79289_at_NA_illumina          | Clone 23695 mRNA sequence                   | 3619.1604 |
| 7962 | U79289_at-2_NA_illumina        | Human clone 23695 mRNA sequence             | 3619.1604 |
| 7963 | RC_AA406056_at_GI_24475633-S   | Homo sapiens CAGH32 mRNA, partial cds       | 3619.2332 |
| 7964 | AA313990_at_GI_41349448-A      | EST: EST186070 Colon carcinoma (HCC)        | 3619.3557 |
| 7965 | RC_AA443720_f_at_GI_33468964-S | EST: zw88c11.s1 Soares total fetus          | 3619.8025 |
| 7966 | RC_AA496980_at_GI_19923305-S   | KIAA0331 gene product                       | 3620.0706 |
| 7967 | X73029_at_NA_illumina          | Nitric oxide synthase 2A (inducible,        | 3620.8447 |
| 7968 | D38073_at_GI_33356548-S        | MCM3 Minichromosome maintenance             | 3620.968  |
| 7969 | RC_AA598452_at_NA_illumina     | EST: ae48g03.s1 Stratagene lung             | 3621.074  |
| 7970 | RC_AA121732_at_NA_illumina     | EST: zn80h05.s1 Stratagene lung             | 3621.1736 |
| 7971 | AA488108_at_GI_10280625-S      | Homo sapiens mRNA for APS, complete         | 3621.304  |
| 7972 | RC_AA455999_at_NA_illumina     | EST: aa02e01.s1 Soares NhHMPu S1            | 3621.3933 |
| 7973 | W28230_at_NA_illumina          | EST: 43h12 Human retina cDNA randomly       | 3621.777  |
| 7974 | T99606_at_NA_illumina          | EST: ye65h01.r1 Homo sapiens cDNA           | 3622.3357 |
| 7975 | R11267_at_GI_13184045-S        | Homo sapiens chromosome 19, cosmid          | 3622.4905 |
| 7976 | RC_AA251765_at_GI_23110973-A   | EST: zs09a08.s1 NCI_CGAP_GCB1               | 3622.639  |
| 7977 | L10717_at-2_NA_illumina        | Homo sapiens T cell-specific tyrosine       | 3622.7488 |
| 7978 | L10717_at_NA_illumina          | TYROSINE-PROTEIN KINASE ITK/TSK             | 3622.7488 |
| 7979 | T89831_s_at_NA_illumina        | Homo sapiens mRNA for KIAA0692              | 3622.9268 |
| 7980 | RC_AA449677_at_GI_28416437-S   | EST: zx07b04.s1 Soares total fetus          | 3623.2139 |
| 7981 | U01317_cds6_at_GI_28302128-S   | Beta-globin thalassemia gene extracted      | 3623.6653 |
| 7982 | RC_AA448817_at_GI_40538729-S   | EST: zx10h01.s1 Soares total fetus          | 3623.736  |
| 7983 | AB000905_at_GI_18105065-S      | DNA for H4 histone                          | 3623.7905 |
| 7984 | RC_AA011054_at_NA_illumina     | EST: ze22f03.s1 Soares fetal heart          | 3624.4438 |
| 7985 | AA195457_at_GI_7706680-S       | EST: zr36a12.r1 Soares NhHMPu S1            | 3624.567  |
| 7986 | AA453331_at_NA_illumina        | EST: zx44g02.r1 Soares total fetus          | 3624.6304 |

|      |                              |                                         |           |
|------|------------------------------|-----------------------------------------|-----------|
| 7987 | RC_AA021301_at_NA_illumina   | EST: ze66e02.s1 Soares retina N2b4HR    | 3624.7913 |
| 7988 | W94477_at_NA_illumina        | EST: ze12g06.r1 Soares fetal heart      | 3625.256  |
| 7989 | RC_AA429027_at_GI_20127147-S | EST: zw19f11.s1 Soares ovary tumor      | 3625.3594 |
| 7990 | RC_AA490964_at_GI_14249499-S | EST: aa48f11.s1 NCI_CGAP_GCB1 Homo      | 3625.6711 |
| 7991 | AA315930_at_NA_illumina      | EST: EST187807 Colon carcinoma (HCC)    | 3626.124  |
| 7992 | U52100_at_GI_42716292-S      | XMP mRNA                                | 3626.2534 |
| 7993 | R73299_at_NA_illumina        | Tissue inhibitor of metalloproteinase 3 | 3626.4194 |
| 7994 | RC_AA039448_at_GI_19923478-S | EST: zf08c10.s1 Soares fetal heart      | 3626.422  |
| 7995 | U67733_at_GI_4505656-S       | CGMP-stimulated 3',5'-cyclic nucleotide | 3626.6133 |
| 7996 | RC_AA427946_at_NA_illumina   | H.sapiens novel gene, similar to mouse  | 3626.7627 |
| 7997 | W26738_at_GI_39725640-S      | EST: 12b5 Human retina cDNA randomly    | 3626.8872 |
| 7998 | D86959_at_GI_41281452-S      | KIAA0204 gene                           | 3626.9714 |
| 7999 | D86959_at-2_NA_illumina      | KIAA0204 gene product                   | 3626.9714 |
| 8000 | RC_AA433950_at_NA_illumina   | EST: zw52h02.s1 Soares total fetus      | 3627.0854 |
| 8001 | RC_AA283824_at_NA_illumina   | WD40 protein Ciao1                      | 3627.6572 |
| 8002 | RC_AA504210_at_GI_31343344-S | EST: aa59h10.s1 NCI_CGAP_GCB1           | 3627.8806 |
| 8003 | RC_AA226990_at_GI_29893561-S | EST: zr18h05.s1 Stratagene NT2 neuronal | 3628.3188 |
| 8004 | RC_AA430371_at_NA_illumina   | EST: zw20f09.s1 Soares ovary tumor      | 3628.5073 |
| 8005 | U89606_at_GI_18644884-S      | Pyridoxal kinase mRNA                   | 3628.5115 |
| 8006 | T89072_at_NA_illumina        | EST: yd97g10.r1 Homo sapiens cDNA       | 3628.994  |
| 8007 | RC_AA621125_at_NA_illumina   | EST: af34f08.s1 Soares total fetus      | 3629.2546 |
| 8008 | D14539_at_GI_21361271-S      | Human mRNA for LTG19. (from Genbank)    | 3629.3647 |
| 8009 | M55210_at_GI_9845497-S       | LAMC1 Laminin, gamma 1 (formerly        | 3630.3926 |
| 8010 | AB000409_at_GI_34147650-S    | MNK1                                    | 3630.4663 |
| 8011 | AA115058_s_at_GI_39777615-A  | EST: zl08g09.r1 Soares pregnant uterus  | 3630.4924 |
| 8012 | U33818_at_GI_6552335-S       | Inducible poly(A)-binding protein mRNA  | 3630.7185 |
| 8013 | C02459_at_NA_illumina        | EST: HUMGS0012342, Human Gene           | 3630.7917 |
| 8014 | RC_AA599860_at_NA_illumina   | EST: ag33g03.s1 Jia bone marrow stroma  | 3630.8162 |
| 8015 | RC_AA342918_at_GI_31377616-S | EST: EST48530 Fetal spleen Homo         | 3631.5005 |
| 8016 | H91819_at_NA_illumina        | EST: yv04h03.r1 Homo sapiens cDNA       | 3631.6187 |
| 8017 | RC_AA441800_at_NA_illumina   | Protein kinase inhibitor [human,        | 3631.6484 |
| 8018 | RC_AA210695_at_NA_illumina   | EST: zr88b05.s1 NCI_CGAP_GCB1 Homo      | 3631.672  |
| 8019 | RC_D59682_s_at_NA_illumina   | EST: Human fetal brain cDNA 3'-end GEN- | 3631.6921 |
| 8020 | AF000546_at_GI_38327549-S    | Homo sapiens purinergic receptor P2Y5   | 3631.706  |
| 8021 | AA090157_at_GI_24307878-S    | EST: cchp0030.seq.F Fetal heart, Lambda | 3632.077  |
| 8022 | RC_D60524_f_at_NA_illumina   | EST: Human fetal brain cDNA 3'-end GEN- | 3632.2136 |
| 8023 | RC_AA173417_at_GI_22027505-A | EST: zp02d01.s1 Stratagene ovarian      | 3632.604  |
| 8024 | RC_AA297746_at_NA_illumina   | EST: EST113318 Infant brain Homo        | 3632.8928 |
| 8025 | AA284558_at_NA_illumina      | Homo sapiens mRNA for Nck, Ash and      | 3633.4216 |
| 8026 | RC_AA417912_at_NA_illumina   | EST: zv94a05.s1 Soares NhHMPu S1        | 3633.587  |
| 8027 | RC_D25755_s_at_NA_illumina   | EST: Human colon 3'directed MboI cDNA,  | 3633.7366 |
| 8028 | H29988_at_NA_illumina        | EST: yp44f08.r1 Homo sapiens cDNA       | 3633.8025 |
| 8029 | HG274-HT274_s_at_NA_illumina | Gamma-Glutamyltransferase 1             | 3634.0806 |

|      |                                |                                            |           |
|------|--------------------------------|--------------------------------------------|-----------|
| 8030 | RC_AA489790_at_GI_37540255-S   | EST: ab01e12.s1 Stratagene fetal retina    | 3635.5703 |
| 8031 | W38778_s_at_NA_illumina        | EST: zb27g04.r1 Soares parathyroid tumor   | 3635.5784 |
| 8032 | H90124_at_NA_illumina          | EST: yu83h04.r1 Homo sapiens cDNA          | 3635.743  |
| 8033 | AA397724_at_GI_4757789-S       | Ash2 (absent, small, or homeotic,          | 3635.9233 |
| 8034 | AA223083_at_GI_33598962-S      | EST: PMY0361 KG1-a Lambda Zap              | 3636.0188 |
| 8035 | D63412_at_GI_38373687-A        | AQP4 Aquaporin 4                           | 3636.0703 |
| 8036 | S74017_at_GI_20149575-S        | Nrf2                                       | 3636.4456 |
| 8037 | X82068_at_GI_32528272-A        | GLUTAMATE RECEPTOR 3                       | 3636.8    |
| 8038 | X82068_at-2_NA_illumina        | Glutamate receptor, ionotropic, AMPA 3     | 3636.8    |
| 8039 | RC_AA029455_at_GI_33356169-S   | Homo sapiens myosin-IXb splice variant     | 3637.491  |
| 8040 | AA464468_at_GI_19718758-A      | EST: zx84d05.r1 Soares ovary tumor         | 3637.6697 |
| 8041 | X15376_at_GI_38788134-A        | GABRG2 Gamma-aminobutyric acid             | 3637.758  |
| 8042 | RC_AA370556_at_GI_23821014-S   | EST: EST82217 Prostate gland I Homo        | 3637.7585 |
| 8043 | AA173597_at_GI_16418396-S      | EST: zp03c08.r1 Stratagene ovarian         | 3637.7803 |
| 8044 | X99664_at_GI_20070145-S        | Protein containing SH3 domain, SH3GL3      | 3638.3083 |
| 8045 | X99664_at-2_NA_illumina        | SH3-domain GRB2-like 3                     | 3638.3083 |
| 8046 | J04093_s_at_NA_illumina        | UDP-GLUCURONOSYLTRANSFERASE                | 3638.6287 |
| 8047 | AA166778_at_GI_37550278-S      | EST: zo85c07.r1 Stratagene ovarian         | 3639.5618 |
| 8048 | U80184_ma1_at_GI_22547155-S    | FLII gene                                  | 3639.5972 |
| 8049 | RC_AA400528_at_GI_27735142-S   | EST: zu70f09.s1 Soares testis NHT Homo     | 3639.8984 |
| 8050 | AB002376_at_NA_illumina        | Human mRNA for KIAA0378 gene, partial      | 3640.199  |
| 8051 | RC_AA424558_at_GI_9943841-S    | EST: zv91e05.s1 Soares NhHMPu S1           | 3640.7986 |
| 8052 | J03474_at_NA_illumina          | SERUM AMYLOID A PROTEIN                    | 3640.8264 |
| 8053 | RC_AA477701_at_GI_5453837-S    | Homo sapiens mRNA for p27, complete        | 3641.0876 |
| 8054 | X59770_at_GI_27894333-A        | INTERLEUKIN-1 RECEPTOR, TYPE II            | 3641.402  |
| 8055 | S57235_at_GI_4557434-S         | CD68 CD68 antigen                          | 3641.6787 |
| 8056 | S57235_at-2_NA_illumina        | CD68 antigen                               | 3641.6787 |
| 8057 | RC_AA621209_at_NA_illumina     | Homo sapiens KE04p mRNA, complete          | 3641.733  |
| 8058 | M81886_s_at-2_NA_illumina      | Glutamate receptor, ionotropic, AMPA 1     | 3641.7837 |
| 8059 | M81886_s_at_NA_illumina        | GRIA1 Glutamate receptor, ionotropic,      | 3641.7837 |
| 8060 | RC_AA460949_at_GI_8393671-S    | EST: zx63a03.s1 Soares total fetus         | 3641.8542 |
| 8061 | L40386_s_at_GI_5454111-S       | DP2 (Humdp2) mRNA                          | 3642.1196 |
| 8062 | RC_AA026397_at_NA_illumina     | Homo sapiens clone 24804 mRNA              | 3642.1296 |
| 8063 | RC_AA134985_at_GI_21071013-A   | EST: zo26h05.s1 Stratagene colon           | 3642.404  |
| 8064 | AC002398_cds4_at_GI_28144915-S | Human DNA from chromosome 19-specific      | 3642.7    |
| 8065 | M34309_at_GI_4503596-S         | ERBB3 V-erb-b2 avian erythroblastic        | 3643.322  |
| 8066 | AA444374_at_GI_30474872-A      | Zv76b10.r1 Soares total fetus Nb2HF8 9w    | 3643.406  |
| 8067 | X94232_at_NA_illumina          | Novel T-cell activation protein            | 3643.5015 |
| 8068 | W07461_at_NA_illumina          | EST: za97f08.r1 Soares fetal lung          | 3643.734  |
| 8069 | RC_AA496204_at_GI_13129099-S   | EST: zx70a12.s1 Soares total fetus         | 3644.0977 |
| 8070 | RC_AA284795_at_GI_22538479-A   | EST: zt24f11.s1 Soares ovary tumor         | 3644.8135 |
| 8071 | U79734_at_GI_38045918-S        | Huntingtin interacting protein (HIP1) mRNA | 3645.0115 |
| 8072 | U79734_at-2_NA_illumina        | Huntingtin interacting protein 1           | 3645.0115 |

|      |                                 |                                           |           |
|------|---------------------------------|-------------------------------------------|-----------|
| 8073 | X67734_at_GI_28373120-S         | AXONIN-1 PRECURSOR                        | 3645.1406 |
| 8074 | H42381_at_NA_illumina           | EST: yo67h01.r1 Homo sapiens cDNA         | 3645.3342 |
| 8075 | H05401_at_NA_illumina           | EST: yl80d09.r1 Homo sapiens cDNA         | 3645.3818 |
| 8076 | RC_AA348001_at_NA_illumina      | Homo sapiens clone 23604 mRNA             | 3645.6345 |
| 8077 | RC_AA497026_at_GI_40217838-S    | EST: ae32h05.s1 Gessler Wilms tumor       | 3646.272  |
| 8078 | W03008_at_GI_35250828-S         | EST: za02h03.r1 Soares melanocyte         | 3646.409  |
| 8079 | HG2614-HT2710_at_NA_illumina    | Collagen, Type VIII, Alpha 1              | 3646.627  |
| 8080 | U28386_at_GI_4504896-S          | RCH1 RAG (recombination activating        | 3646.8167 |
| 8081 | H20332_at_GI_32698754-S         | EST: yn53a03.r1 Homo sapiens cDNA         | 3646.8313 |
| 8082 | N79268_at_GI_37574605-A         | Zinc finger protein 198                   | 3646.866  |
| 8083 | D10511_at_GI_31563501-S         | ACAT1 Acetyl-Coenzyme A                   | 3646.8818 |
| 8084 | W02197_at_NA_illumina           | Homo sapiens clone 23568, 23621, 23795,   | 3646.966  |
| 8085 | RC_AA599041_at_GI_22538793-A    | Homo sapiens apoptosis-related protein    | 3647.137  |
| 8086 | U29463_s_at_GI_27597087-S       | Cytochrome b561 gene                      | 3647.1611 |
| 8087 | X04145_at_GI_4557428-S          | CD3G CD3G antigen, gamma polypeptide      | 3647.1936 |
| 8088 | J03060_at_NA_illumina           | GBA Glucosidase, beta; acid (includes     | 3647.3433 |
| 8089 | RC_AA447768_at_NA_illumina      | EST: aa18h12.s1 Soares NhHMPu S1          | 3647.4272 |
| 8090 | U22526_at-2_NA_illumina         | Lanosterol synthase (2,3-oxidosqualene-   | 3647.6216 |
| 8091 | U22526_at_NA_illumina           | 2,3-oxidosqualene-lanosterol cyclase      | 3647.6216 |
| 8092 | RC_AA004862_at_NA_illumina      | EST: zh94c05.s1 Soares fetal liver spleen | 3647.8455 |
| 8093 | U56998_at_GI_41872373-S         | Putative serine/threonine protein kinase  | 3648.0508 |
| 8094 | M26315_cds2_s_at_NA_illumina    | CD8 antigen, alpha polypeptide (p32)      | 3648.5781 |
| 8095 | RC_AA037684_at_NA_illumina      | EST: zk34g12.s1 Soares pregnant uterus    | 3648.8577 |
| 8096 | M14338_at_GI_4506116-S          | PROS1 Plasma protein S                    | 3650.1265 |
| 8097 | RC_AA406105_at_GI_38373686-S    | Adaptin, gamma                            | 3650.5344 |
| 8098 | U79667_s_at_GI_13386499-A       | Alpha1A-voltage-dependent calcium         | 3650.7637 |
| 8099 | RC_AA192760_at_NA_illumina      | EST: zq12d01.s1 Stratagene muscle         | 3650.8086 |
| 8100 | RC_AA431317_at_NA_illumina      | EST: zw70d08.s1 Soares testis NHT         | 3650.839  |
| 8101 | D54358_at_NA_illumina           | KIAA0336 gene product                     | 3650.975  |
| 8102 | AD000092_cds7_s_at_GI_19924137- | RAD23A gene (human RAD23A homolog)        | 3651.0793 |
| 8103 | H42262_at_GI_25282468-S         | EST: yo63a04.r1 Homo sapiens cDNA         | 3651.1165 |
| 8104 | T78668_s_at_NA_illumina         | EST: yd01b06.r1 Homo sapiens cDNA         | 3651.7124 |
| 8105 | HG2705-HT2801_s_at_NA_illumina  | Serine/Threonine Kinase (Gb:Z25427)       | 3651.96   |
| 8106 | M21984_at_GI_5803202-S          | TROPONIN T, FAST SKELETAL MUSCLE          | 3652.6829 |
| 8107 | AA095959_at_NA_illumina         | Homo sapiens clone 24649 mRNA             | 3652.6921 |
| 8108 | RC_AA453431_at_NA_illumina      | EST: zx32g10.s1 Soares total fetus        | 3652.7593 |
| 8109 | HG2566-HT4792_r_at_NA_illumina  | Microtubule-Associated Protein Tau, Alt.  | 3653.0818 |
| 8110 | R71365_at_GI_37549246-S         | EST: yi54h10.r1 Homo sapiens cDNA         | 3653.168  |
| 8111 | W20121_at_NA_illumina           | Homo sapiens clone 192 Rer1 mRNA,         | 3653.4556 |
| 8112 | RC_AA085851_at_NA_illumina      | Homo sapiens clone 24658 mRNA             | 3653.5476 |
| 8113 | M14949_at_GI_20127497-S         | RAS-RELATED PROTEIN R-RAS                 | 3653.5955 |
| 8114 | L11005_at_GI_6598319-S          | ALDEHYDE OXIDASE                          | 3653.8303 |
| 8115 | RC_AA448471_at_NA_illumina      | Homo sapiens HRIHFB2038 mRNA,             | 3653.871  |

|      |                              |                                              |           |
|------|------------------------------|----------------------------------------------|-----------|
| 8116 | D16481_at_GI_4504326-S       | Mitochondrial 3-ketoacyl-CoA thiolase beta-  | 3653.9653 |
| 8117 | RC_AA076663_s_at_NA_illumina | Human mRNA for KIAA0252 gene, partial        | 3654.5767 |
| 8118 | RC_AA487202_at_NA_illumina   | EST: ab19f04.s1 Stratagene lung              | 3655.5603 |
| 8119 | RC_AA233545_at_GI_7661527-S  | EST: zr30h12.s1 Stratagene NT2 neuronal      | 3655.6611 |
| 8120 | H19570_s_at_NA_illumina      | EST: yn59b03.r1 Homo sapiens cDNA            | 3656.1956 |
| 8121 | AA314096_at_GI_22748888-S    | EST185947 Colon carcinoma (HCC) cell         | 3656.24   |
| 8122 | R94662_at_GI_20336760-S      | EST: yq42d12.r1 Homo sapiens cDNA            | 3656.448  |
| 8123 | RC_AA456933_at_GI_34147434-S | EST: aa90c07.s1 Stratagene fetal retina      | 3656.455  |
| 8124 | Y12065_at_GI_32483373-S      | Homo sapiens mRNA for nucleolar protein      | 3656.6611 |
| 8125 | L20591_at_GI_4826642-S       | ANX3 Annexin III (lipocortin III)            | 3656.7007 |
| 8126 | RC_AA236489_at_GI_13435382-S | EST: zr75b10.s1 Soares NhHMPu S1             | 3656.7036 |
| 8127 | RC_AA236356_at_NA_illumina   | Zr54a11.s1 Soares_NhHMPu_S1 Homo             | 3656.7764 |
| 8128 | D42040_s_at_GI_12408641-S    | RING3 PROTEIN                                | 3656.788  |
| 8129 | RC_AA448632_at_NA_illumina   | EST: zx10b01.s1 Soares total fetus           | 3657.2502 |
| 8130 | RC_AA256990_at_GI_7662275-S  | EST: zr81h08.s1 Soares NhHMPu S1             | 3657.551  |
| 8131 | X66534_at_GI_4504212-S       | GUANYLATE CYCLASE SOLUBLE,                   | 3657.6536 |
| 8132 | W05585_at_NA_illumina        | EST: za85a06.r1 Soares fetal lung            | 3657.803  |
| 8133 | X78706_at_GI_21618335-A      | CRAT Carnitine acetyltransferase             | 3658.0178 |
| 8134 | W32012_at_NA_illumina        | EST: zb96c10.r1 Soares parathyroid tumor     | 3658.3052 |
| 8135 | RC_AA406126_at_GI_31543290-S | EST: zu65b08.s1 Soares testis NHT Homo       | 3658.8872 |
| 8136 | H67632_at_NA_illumina        | Karyopherin (importin) beta 1                | 3659.026  |
| 8137 | RC_AA489383_at_NA_illumina   | EST: ab41e08.s1 Stratagene HeLa cell s3      | 3659.2915 |
| 8138 | RC_AA609795_at_GI_4507266-S  | EST: ae62a09.s1 Stratagene lung              | 3659.3257 |
| 8139 | RC_AA435551_at_GI_9966792-S  | EST: zt73a10.s1 Soares testis NHT Homo       | 3659.4473 |
| 8140 | Y10871_at_NA_illumina        | Twist gene                                   | 3659.5728 |
| 8141 | M29932_s_at_GI_4557266-S     | ADRB3 Adrenergic, beta-3-, receptor          | 3659.6648 |
| 8142 | U27460_at_NA_illumina        | Uridine diphosphoglucose                     | 3659.7424 |
| 8143 | RC_AA609043_at_NA_illumina   | Eukaryotic translation initiation factor 4   | 3659.8645 |
| 8144 | C01765_at_NA_illumina        | EST: HUMGS0003713, Human Gene                | 3659.9285 |
| 8145 | RC_AA465245_at_NA_illumina   | EST: aa24h12.s1 NCI_CGAP_GCB1                | 3660.1428 |
| 8146 | RC_AA463453_at_GI_31541858-S | EST: zx98b12.s1 Soares NhHMPu S1             | 3660.4795 |
| 8147 | T83223_at_NA_illumina        | Retinoblastoma-binding protein 4             | 3660.9055 |
| 8148 | C02460_at_GI_31543655-S      | EST: HUMGS0012343, Human Gene                | 3660.932  |
| 8149 | W73537_at_NA_illumina        | EST: zd54b08.r1 Soares fetal heart           | 3661.3003 |
| 8150 | RC_AA398386_at_NA_illumina   | EST: zt62d05.s1 Soares testis NHT Homo       | 3661.523  |
| 8151 | RC_AA252672_s_at_NA_illumina | Diphtheria toxin resistance protein required | 3661.8247 |
| 8152 | AA406474_at_NA_illumina      | Inositol(myo)-1(or 4)-monophosphatase 1      | 3662.0925 |
| 8153 | L35848_at_GI_23110992-S      | CD20 antigen-like (hematopoietic cell-       | 3662.4976 |
| 8154 | AA278829_at_NA_illumina      | Homo sapiens mRNA for KIAA0871               | 3663.0935 |
| 8155 | W28931_at_NA_illumina        | EST: 56f3 Human retina cDNA randomly         | 3663.1885 |
| 8156 | RC_AA421767_at_NA_illumina   | EST: zu24g04.s1 Soares NhHMPu S1             | 3663.2441 |
| 8157 | D87071_at_NA_illumina        | KIAA0233 gene                                | 3663.2593 |
| 8158 | RC_AA411228_at_NA_illumina   | EST: zv25f11.s1 Soares NhHMPu S1             | 3663.5935 |

|      |                                |                                           |           |
|------|--------------------------------|-------------------------------------------|-----------|
| 8159 | RC_AA255539_at_NA_illumina     | KIAA0494 gene product                     | 3663.6255 |
| 8160 | RC_AA052952_at_NA_illumina     | EST: zl70a08.s1 Stratagene colon          | 3663.854  |
| 8161 | D50312_at_GI_25121968-S        | UKATP-1                                   | 3664.157  |
| 8162 | D50312_at-2_NA_illumina        | Potassium inwardly-rectifying channel,    | 3664.157  |
| 8163 | H53555_at_NA_illumina          | EST: yq86g10.r1 Homo sapiens cDNA         | 3664.4229 |
| 8164 | U07424_at_GI_4758339-S         | Putative tRNA synthetase-like protein     | 3664.6323 |
| 8165 | RC_AA278670_at_GI_37059741-S   | EST: zs77a05.s1 NCI_CGAP_GCB1             | 3664.7783 |
| 8166 | D58024_s_at_GI_37540060-S      | EST: Human aorta cDNA 5'-end GEN-         | 3664.9856 |
| 8167 | RC_AA253243_at_GI_16306484-S   | EST: zr53h06.s1 Soares NhHMPu S1          | 3666.0898 |
| 8168 | AA448101_at_GI_37574716-S      | EST: zw82c11.r1 Soares testis NHT Homo    | 3666.2769 |
| 8169 | X99585_at_NA_illumina          | SMT3B protein                             | 3666.5286 |
| 8170 | RC_AA460974_at_GI_34147367-S   | Tropomyosin 1 (alpha)                     | 3666.5615 |
| 8171 | U92314_s_at-2_NA_illumina      | Sulfotransferase family 2B, member 1      | 3666.783  |
| 8172 | U92314_s_at_GI_31563385-A      | Hydroxysteroid sulfotransferase           | 3666.783  |
| 8173 | C00358_at_GI_34147652-S        | EST: HUMGS0003384, Human Gene             | 3667.2878 |
| 8174 | RC_AA459905_at_NA_illumina     | EST: zx73f07.s1 Soares ovary tumor        | 3668.037  |
| 8175 | H87319_at_GI_44680157-S        | Ys73g04.r1 Homo sapiens cDNA clone        | 3668.377  |
| 8176 | AA410918_s_at_GI_18375664-A    | EST: zv39e03.r1 Soares ovary tumor        | 3668.4426 |
| 8177 | RC_AA479101_at_GI_5902065-S    | EST: zv17f04.s1 Soares NhHMPu S1          | 3668.6106 |
| 8178 | S69965_at_GI_6466453-S         | SNCB Synuclein, beta                      | 3668.7166 |
| 8179 | RC_AA255464_at_GI_40538735-S   | EST: zr83b02.s1 Soares NhHMPu S1          | 3668.7498 |
| 8180 | W88449_at_GI_19913386-S        | EST: zh69h03.r1 Soares fetal liver spleen | 3668.9102 |
| 8181 | U34301_at_NA_illumina          | Nonmuscle myosin heavy chain IIB gene,    | 3669.0134 |
| 8182 | RC_AA242822_at_NA_illumina     | EST: zr65e09.s1 Soares NhHMPu S1          | 3669.3594 |
| 8183 | HG3484-HT3678_s_at_NA_illumina | Protein Kinase (Gb:M59287)                | 3669.3884 |
| 8184 | RC_AA600150_at_NA_illumina     | EST: ae50d12.s1 Stratagene lung           | 3669.556  |
| 8185 | RC_AA214288_at_NA_illumina     | EST: zq90h09.s1 Stratagene hNT neuron     | 3669.711  |
| 8186 | RC_D60374_f_at_NA_illumina     | EST: Human fetal brain cDNA 3'-end GEN-   | 3669.7295 |
| 8187 | K03192_f_at-2_NA_illumina      | Cytochrome P450, subfamily IIA            | 3670.1262 |
| 8188 | K03192_f_at_GI_20522239-S      | CYP2A6 Cytochrome P450, subfamily IIA     | 3670.1262 |
| 8189 | AA480143_at_NA_illumina        | EST: zv42h10.r1 Soares ovary tumor        | 3670.6023 |
| 8190 | RC_AA449454_f_at_NA_illumina   | EST: zx05e09.s1 Soares total fetus        | 3670.7886 |
| 8191 | X13973_at_NA_illumina          | RNH Ribonuclease/angiogenin inhibitor     | 3671.6313 |
| 8192 | RC_AA610121_at_NA_illumina     | EST: af19h05.s1 Soares total fetus        | 3671.7437 |
| 8193 | AA247455_at_GI_11968022-S      | EST: csg2890.seq.F Human fetal heart,     | 3672.1494 |
| 8194 | RC_AA001941_at_NA_illumina     | EST: zh83c02.s1 Soares fetal liver spleen | 3672.9236 |
| 8195 | L00022_s_at_NA_illumina        | IG EPSILON CHAIN C REGION                 | 3673.017  |
| 8196 | RC_AA282914_at_NA_illumina     | EST: zt14d03.s1 NCI_CGAP_GCB1 Homo        | 3673.1768 |
| 8197 | L24203_at_GI_17402906-A        | Ataxia-telangiectasia group D-associated  | 3673.1775 |
| 8198 | RC_AA443663_s_at_NA_illumina   | Sperm surface protein                     | 3673.2124 |
| 8199 | AA143521_at_NA_illumina        | Homo sapiens mRNA for KIAA0676            | 3673.293  |
| 8200 | X99728_at_GI_21361323-S        | NDUFV3 gene, exon 3                       | 3673.584  |
| 8201 | L33404_at_GI_21327704-A        | Stratum corneum chymotryptic enzyme       | 3673.729  |

|      |                                |                                           |           |
|------|--------------------------------|-------------------------------------------|-----------|
| 8202 | RC_AA292701_at_NA_illumina     | EST: zs59a07.s1 NCI_CGAP_GCB1             | 3674.1033 |
| 8203 | D31161_s_at_NA_illumina        | EST: Human fetal-lung cDNA 5'-end         | 3674.187  |
| 8204 | W01094_at_NA_illumina          | EST: yz95a11.r1 Soares melanocyte         | 3674.229  |
| 8205 | AA312078_at_GI_35493951-A      | EST: EST182774 Jurkat T-cells VI Homo     | 3674.2327 |
| 8206 | AA214085_at_NA_illumina        | EST: zn57h08.r1 Stratagene muscle         | 3674.423  |
| 8207 | RC_AA025930_at_GI_30410718-S   | EST: ze84a02.s1 Soares fetal heart        | 3674.8792 |
| 8208 | AA477214_at_NA_illumina        | EST: zu28h04.r1 Soares ovary tumor        | 3675.0461 |
| 8209 | RC_AA083211_at_GI_10864046-S   | EST: zn31e05.s1 Stratagene endothelial    | 3675.12   |
| 8210 | RC_D60033_at_NA_illumina       | EST: Human fetal brain cDNA 3'-end GEN-   | 3675.8782 |
| 8211 | RC_AA054087_at_GI_4505850-S    | Phospholipase A2, group IVC (cytosolic,   | 3676.495  |
| 8212 | U18548_at_GI_4885294-S         | GPR12 G protein coupled-receptor gene     | 3677.0205 |
| 8213 | U04313_at_GI_4505788-S         | PI5 Protease inhibitor 5 (maspin)         | 3677.1165 |
| 8214 | RC_AA485147_at_NA_illumina     | EST: aa40h06.s1 NCI_CGAP_GCB1             | 3677.366  |
| 8215 | L21715_at_GI_4507620-S         | TNNI2 Troponin I (skeletal fast)          | 3677.4048 |
| 8216 | RC_AA609053_at_GI_38455386-S   | EST: af10f08.s1 Soares testis NHT Homo    | 3677.6782 |
| 8217 | AF008445_at_GI_10863876-S      | Phospholipid scramblase mRNA              | 3677.6814 |
| 8218 | RC_AA489101_at_NA_illumina     | EST: aa56h11.s1 NCI_CGAP_GCB1             | 3678.247  |
| 8219 | N23568_at_NA_illumina          | KIAA0331 gene product                     | 3678.431  |
| 8220 | M97856_at_GI_27262629-A        | NASP Nuclear autoantigenic sperm protein  | 3678.6548 |
| 8221 | R12538_at_NA_illumina          | EST: yf56b10.r1 Homo sapiens cDNA         | 3679.944  |
| 8222 | RC_AA460264_at_NA_illumina     | KIAA0677 gene product                     | 3680.4812 |
| 8223 | L41162_at_GI_17921994-S        | COL9A3 Collagen, type IX, alpha 3         | 3680.6467 |
| 8224 | U04636_rna1_at_NA_illumina     | Cyclooxygenase-2 (hCox-2) gene            | 3680.7485 |
| 8225 | U04636_rna1_at-2_NA_illumina   | Prostaglandin-endoperoxide synthase 2     | 3680.7485 |
| 8226 | U48251_at_GI_34335263-A        | Protein kinase C-binding protein RACK7    | 3681.2185 |
| 8227 | RC_AA025296_at_GI_34147337-S   | EST: ze74d01.s1 Soares fetal heart        | 3681.338  |
| 8228 | U70981_at_GI_26787976-S        | IL13 receptor                             | 3681.5974 |
| 8229 | RC_AA418693_at_NA_illumina     | EST: zv98a07.s1 Soares NhHMPu S1          | 3681.748  |
| 8230 | RC_AA491001_f_at_GI_37537717-S | EST: aa52g12.s1 NCI_CGAP_GCB1             | 3681.9392 |
| 8231 | RC_AA005329_at_NA_illumina     | EST: zh90f09.s1 Soares fetal liver spleen | 3682.0386 |
| 8232 | AF010126_at_GI_4507112-S       | Synuclein, gamma (breast cancer-specific  | 3682.1975 |
| 8233 | C01766_r_at_GI_14249643-S      | EST: HUMGS0003714, Human Gene             | 3682.246  |
| 8234 | AA172215_s_at_NA_illumina      | EST: zo98b01.r1 Stratagene ovarian        | 3682.332  |
| 8235 | Y07867_at_GI_4505822-S         | Pirin, isolate 1                          | 3682.6191 |
| 8236 | AA353516_at_GI_32189315-A      | EST: EST61676 Activated T-cells XX        | 3682.747  |
| 8237 | M77829_s_at_GI_37694060-A      | AQP1 Aquaporin 1 (channel-forming         | 3683.8445 |
| 8238 | AA059327_s_at_NA_illumina      | EST: zf65e11.r1 Soares retina N2b4HR      | 3684.2432 |
| 8239 | W46245_at_NA_illumina          | Zc32a12.r1 Soares senescent fibroblasts   | 3684.2554 |
| 8240 | RC_AA169640_at_NA_illumina     | Homo sapiens mRNA for KIAA0643            | 3684.57   |
| 8241 | R91345_at_NA_illumina          | PHOSPHATIDYLINOSITOL                      | 3684.9705 |
| 8242 | AA232121_s_at_NA_illumina      | Tyrosyl-tRNA synthetase                   | 3685.458  |
| 8243 | T74445_at_NA_illumina          | Yc82f08.r1 Homo sapiens cDNA clone        | 3685.486  |
| 8244 | Y13645_at_NA_illumina          | Homo sapiens uroplakin II mRNA, partial   | 3685.5725 |



|      |                              |                                         |           |
|------|------------------------------|-----------------------------------------|-----------|
| 8245 | RC_AA600328_at_GI_19913362-S | Homo sapiens Wolf-Hirschhorn syndrome   | 3686.2532 |
| 8246 | HG2365-HT2461_at_NA_illumina | Glyceraldehyde-3-Phosphate              | 3686.4214 |
| 8247 | RC_AA282528_at_GI_40254857-S | KIAA0675 gene product                   | 3687.4724 |
| 8248 | M16707_rna1_at_GI_29553982-S | Histone H4 gene, clone FO108            | 3687.5234 |
| 8249 | RC_AA013160_at_GI_40255042-S | EST: ze35e10.s1 Soares retina N2b4HR    | 3687.558  |
| 8250 | AB000466_at_NA_illumina      | mRNA, clone RES4-24C, exon 1, 2, 3      | 3688.2102 |
| 8251 | AA081995_at_NA_illumina      | Zn26d06.r1 Stratagene neuroepithelium   | 3688.4187 |
| 8252 | T83389_at_GI_37059763-S      | EST: yd44a07.r1 Homo sapiens cDNA       | 3688.991  |
| 8253 | RC_AA406363_at_NA_illumina   | EST: zv10b11.s1 Soares NhHMPu S1        | 3689.566  |
| 8254 | AA292411_at_GI_44921602-S    | Zt51d12.r1 Soares ovary tumor NbHOT     | 3689.6511 |
| 8255 | X51699_at_NA_illumina        | Bone gamma-carboxyglutamate (gla)       | 3690.013  |
| 8256 | RC_AA256298_s_at_NA_illumina | EST: zr80d01.s1 Soares NhHMPu S1        | 3690.572  |
| 8257 | RC_AA398595_at_NA_illumina   | EST: zt70a03.s1 Soares testis NHT Homo  | 3690.5876 |
| 8258 | R80351_at_NA_illumina        | EST: yi96e02.r1 Homo sapiens cDNA       | 3690.792  |
| 8259 | RC_AA412250_at_NA_illumina   | EST: zu10a06.s1 Soares testis NHT Homo  | 3690.9973 |
| 8260 | RC_AA121140_at_NA_illumina   | EST: zn30h09.s1 Stratagene              | 3691.0942 |
| 8261 | M22490_at_GI_19528651-A      | BMP4 Bone morphogenetic protein 4       | 3691.2615 |
| 8262 | U24577_at_NA_illumina        | LDL-phospholipase A2 mRNA               | 3691.284  |
| 8263 | C02170_at_GI_21265074-S      | EST: HUMGS0006510, Human Gene           | 3691.5347 |
| 8264 | D29992_at_GI_31543803-S      | TISSUE FACTOR PATHWAY INHIBITOR         | 3691.5525 |
| 8265 | D83597_at-2_NA_illumina      | Lymphocyte antigen 64 (mouse) homolog,  | 3691.5706 |
| 8266 | D83597_at_NA_illumina        | RP105                                   | 3691.5706 |
| 8267 | R06629_at_NA_illumina        | Adducin 2 (beta)                        | 3691.5837 |
| 8268 | X93512_at_GI_21536372-S      | Telomeric DNA binding protein (orf2)    | 3691.8418 |
| 8269 | U18934_at_NA_illumina        | TYRO3 Receptor protein-tyrosine kinase  | 3691.963  |
| 8270 | RC_AA451703_at_GI_41327770-S | Prp28, U5 snRNP 100 kd protein          | 3692.3076 |
| 8271 | AA055019_at_NA_illumina      | EST: zf16g06.r1 Soares fetal heart      | 3692.4575 |
| 8272 | AF001294_at_GI_21071004-S    | IPL (IPL) mRNA                          | 3692.4849 |
| 8273 | RC_AA449215_at_NA_illumina   | EST: zx03h11.s1 Soares total fetus      | 3693.149  |
| 8274 | RC_AA227914_at_NA_illumina   | EST: zr57f05.s1 Soares NhHMPu S1        | 3693.1938 |
| 8275 | RC_AA445996_at_GI_37574713-S | EST: zw64e06.s1 Soares testis NHT       | 3693.3315 |
| 8276 | RC_AA598808_at_NA_illumina   | EST: ae36e07.s1 Gessler Wilms tumor     | 3693.7642 |
| 8277 | AA085661_at_NA_illumina      | EST: zn64d02.r1 Stratagene HeLa cell s3 | 3693.7783 |
| 8278 | Z50853_at_GI_5174418-S       | CLPP                                    | 3693.9006 |
| 8279 | Z15108_at_GI_10864649-S      | PRKCZ Protein kinase C, zeta            | 3693.9797 |
| 8280 | N95645_at_GI_37540913-S      | EST: za29a06.r1 Homo sapiens cDNA       | 3694.3318 |
| 8281 | X51757_at_GI_42822885-S      | HSPA6 Heat shock 70kD protein 6         | 3694.419  |
| 8282 | X51757_at-2_NA_illumina      | Heat shock 70kD protein 6 (HSP70B')     | 3694.419  |
| 8283 | AA481201_at_GI_7661731-S     | EST: aa34c12.r1 NCI_CGAP_GCB1 Homo      | 3694.644  |
| 8284 | X70340_at_GI_4507460-S       | TGFA Transforming growth factor, alpha  | 3694.8157 |
| 8285 | X51420_at_GI_4507756-S       | TYRP1 Tyrosinase-related protein 1      | 3695.5222 |
| 8286 | RC_AA609308_s_at_NA_illumina | Acylphosphatase 1, erythrocyte (common) | 3695.7725 |
| 8287 | L07592_at-2_NA_illumina      | Human peroxisome proliferator activated | 3696.1865 |

|      |                                |                                                              |           |
|------|--------------------------------|--------------------------------------------------------------|-----------|
| 8288 | L07592_at_GI_29171749-A        | Peroxisome proliferator activated receptor                   | 3696.1865 |
| 8289 | X60188_at_GI_38257140-S        | EXTRACELLULAR SIGNAL-REGULATED                               | 3696.2344 |
| 8290 | HG3565-HT3768_r_at_NA_illumina | Zinc Finger Protein (Gb:M88357)                              | 3696.315  |
| 8291 | M31682_at_GI_9257224-S         | INHBB Inhibin, beta B (activin AB beta                       | 3696.3318 |
| 8292 | L10955_cds1_s_at_GI_9951925-S  | Carbonic anhydrase IV gene extracted                         | 3696.426  |
| 8293 | AA434329_at_NA_illumina        | EST: zw24g07.r1 Soares ovary tumor                           | 3696.5393 |
| 8294 | RC_AA442847_at_GI_6466461-A    | RAN binding protein 3                                        | 3696.6987 |
| 8295 | U59752_at_GI_10880123-A        | Sec7p-like protein mRNA, partial cds                         | 3698.415  |
| 8296 | S82447_s_at_NA_illumina        | GCN5-like 1                                                  | 3698.715  |
| 8297 | AA422123_i_at_NA_illumina      | EST: zv26h12.r1 Soares NhHMPu S1                             | 3698.7588 |
| 8298 | C15871_at_NA_illumina          | EST: Human fetal brain cDNA 5'-end GEN-                      | 3698.9343 |
| 8299 | U79288_at_GI_7662163-S         | Clone 23682 mRNA sequence                                    | 3699.1865 |
| 8300 | RC_AA034063_at_NA_illumina     | EST: zi05g06.s1 Soares fetal liver spleen                    | 3699.4016 |
| 8301 | RC_AA431318_at_GI_22035669-A   | EST: zw70d09.s1 Soares testis NHT                            | 3699.878  |
| 8302 | RC_AA621790_at_GI_18860915-S   | EST: af04g04.s1 Soares testis NHT Homo                       | 3699.9956 |
| 8303 | S73885_s_at_GI_4507446-S       | TFAP4 Transcription factor AP-4                              | 3700.4639 |
| 8304 | RC_AA283907_at_NA_illumina     | Homo sapiens clone 23837 mRNA                                | 3700.4998 |
| 8305 | RC_AA227463_at_NA_illumina     | Homo sapiens mRNA for KIAA0859                               | 3701.2021 |
| 8306 | L32831_s_at_GI_31377791-S      | PROBABLE G PROTEIN-COUPLED                                   | 3701.7532 |
| 8307 | RC_AA159961_at_NA_illumina     | EST: zo75b09.s1 Stratagene pancreas                          | 3702.181  |
| 8308 | U25265_at_GI_21729898-A        | Protein tyrosine kinase t-Ror1 (Ror1)                        | 3702.3015 |
| 8309 | U25265_at-2_NA_illumina        | Neurotrophic tyrosine kinase, receptor-                      | 3702.3015 |
| 8310 | RC_AA621681_at_GI_9910391-S    | EST: af48e11.s1 Soares total fetus                           | 3702.4612 |
| 8311 | RC_AA284913_at_NA_illumina     | EST: zt23a08.s1 Soares ovary tumor                           | 3702.5027 |
| 8312 | RC_AA479205_at_NA_illumina     | EST: zv19e05.s1 Soares NhHMPu S1                             | 3702.6377 |
| 8313 | RC_AA069863_at_GI_30150654-S   | EST: zf78c09.s1 Soares pineal gland                          | 3703.73   |
| 8314 | HG3991-HT4261_at_NA_illumina   | Cpg-Enriched Dna, Clone E18                                  | 3703.7966 |
| 8315 | RC_AA447650_at_NA_illumina     | EST: zw97g03.s1 Soares total fetus                           | 3703.871  |
| 8316 | M81181_s_at_GI_40254453-S      | ATP1B2 ATPase, Na <sup>+</sup> /K <sup>+</sup> transporting, | 3703.9282 |
| 8317 | RC_AA489665_at_NA_illumina     | EST: aa50a05.s1 NCI_CGAP_GCB1                                | 3704.2754 |
| 8318 | RC_AA404277_at_NA_illumina     | EST: zv63e04.s1 Soares total fetus                           | 3704.661  |
| 8319 | RC_AA441791_at_NA_illumina     | EST: zw62c02.s1 Soares total fetus                           | 3705.1814 |
| 8320 | D87452_at_GI_23510334-S        | KIAA0263 gene                                                | 3705.314  |
| 8321 | D38522_at_GI_31377588-S        | KIAA0080 gene, partial cds                                   | 3705.4539 |
| 8322 | R61200_at_NA_illumina          | EST: yh06c12.r1 Homo sapiens cDNA                            | 3705.8098 |
| 8323 | RC_AA256461_at_NA_illumina     | EST: zr81a05.s1 Soares NhHMPu S1                             | 3706.0686 |
| 8324 | X54673_at_GI_4507038-S         | SLC6A1 Solute carrier family 6                               | 3706.5415 |
| 8325 | RC_AA379085_at_NA_illumina     | EST: EST91876 Skin tumor I Homo                              | 3706.7483 |
| 8326 | RC_AA252812_at_NA_illumina     | EST: zs27e08.s1 NCI_CGAP_GCB1                                | 3707.2637 |
| 8327 | U92459_at_NA_illumina          | Metabotropic glutamate receptor 8 mRNA                       | 3707.3376 |
| 8328 | U92459_at-2_NA_illumina        | Glutamate receptor, metabotropic 8                           | 3707.3376 |
| 8329 | X74837_at_GI_24497518-S        | HUMM9 mRNA                                                   | 3707.8813 |
| 8330 | R60117_at_NA_illumina          | Myosin, heavy polypeptide 3, skeletal                        | 3708.1387 |

|      |                              |                                           |           |
|------|------------------------------|-------------------------------------------|-----------|
| 8331 | RC_AA287269_at_NA_illumina   | EST: zs52a04.s1 NCI_CGAP_GCB1             | 3708.5327 |
| 8332 | RC_AA476586_at_GI_22748996-S | EST: zx03b09.s1 Soares total fetus        | 3708.6406 |
| 8333 | AA397610_at_NA_illumina      | EST: zt87b11.r1 Soares testis NHT Homo    | 3708.7678 |
| 8334 | U95740_rna2_at_NA_illumina   | 362G6.2 gene extracted from Human         | 3708.9011 |
| 8335 | X74496_at_GI_41349455-S      | PREP Prolyl endopeptidase                 | 3709.5952 |
| 8336 | X74496_at-2_NA_illumina      | Prolyl endopeptidase                      | 3709.5952 |
| 8337 | RC_AA465692_at_NA_illumina   | Homo sapiens mRNA for KIAA0648            | 3710.6724 |
| 8338 | AA091017_at_GI_27886525-A    | EST: yy1646.seq.F Fetal heart, Lambda     | 3710.8853 |
| 8339 | L13278_at_GI_14251216-S      | CRYZ Crystallin zeta (quinone reductase)  | 3711.095  |
| 8340 | X77094_at_GI_7382494-A       | P40phox                                   | 3711.1443 |
| 8341 | X13293_at_GI_31652260-S      | MYBL2 V-myb avian myeloblastosis viral    | 3711.6997 |
| 8342 | AA285293_at_GI_10864016-S    | EST: PMY0799 KG1-a Lambda Zap             | 3712.7046 |
| 8343 | RC_AA223970_at_NA_illumina   | Actin-like 6                              | 3712.9082 |
| 8344 | RC_AA205873_at_NA_illumina   | EST: zq54c06.s1 Stratagene                | 3713.0935 |
| 8345 | D50405_at_GI_13128859-S      | RPD3 protein                              | 3713.1882 |
| 8346 | M91432_at_GI_21327681-S      | ACADM Acyl-Coenzyme A                     | 3713.2905 |
| 8347 | RC_AA235286_at_NA_illumina   | EST: zs37d11.s1 Soares NhHMPu S1          | 3713.3127 |
| 8348 | U00956_at_NA_illumina        | Human clone KDB5.1 (CAC)n/(GTG)n          | 3713.8186 |
| 8349 | AA430008_at_GI_8923908-S     | EST: zw65a08.r1 Soares testis NHT Homo    | 3714.665  |
| 8350 | RC_AA418876_at_NA_illumina   | EST: zv98g07.s1 Soares NhHMPu S1          | 3714.7693 |
| 8351 | AA292234_at_GI_4505612-S     | EST: zt50h06.r1 Soares ovary tumor        | 3714.8357 |
| 8352 | AA091367_at_NA_illumina      | EST: ll1247.seq.F Fetal heart, Lambda     | 3714.9744 |
| 8353 | M93119_at_GI_44890063-S      | INSM1 Insulinoma-associated 1 (symbol     | 3715.3489 |
| 8354 | AA007282_at_GI_21361622-S    | EST: zh97b10.r1 Soares fetal liver spleen | 3715.4744 |
| 8355 | HG4662-HT5075_at_NA_illumina | Omega Light Chain, Immunoglobulin         | 3715.6018 |
| 8356 | RC_AA465720_at_NA_illumina   | EST: aa32f08.s1 NCI_CGAP_GCB1 Homo        | 3715.6665 |
| 8357 | N57464_at_NA_illumina        | CCAAT/enhancer binding protein (C/EBP),   | 3716.6023 |
| 8358 | AA249586_at_NA_illumina      | EST: k0425.seq.F Human fetal heart,       | 3716.7556 |
| 8359 | U71364_at_GI_34147494-S      | Cytoplasmic antiproteinase 3 (CAP3)       | 3717.2856 |
| 8360 | S73288_at_NA_illumina        | Small proline-rich protein SPRK [human,   | 3717.3496 |
| 8361 | RC_AA026597_at_GI_21450676-S | EST: ze92h11.s1 Soares fetal heart        | 3717.4683 |
| 8362 | X51630_at_NA_illumina        | WT1 Wilms tumor 1                         | 3717.952  |
| 8363 | X51441_s_at_NA_illumina      | SERUM AMYLOID A PROTEIN                   | 3717.962  |
| 8364 | RC_AA496574_at_GI_21237796-A | Histone deacetylase 5                     | 3718.0322 |
| 8365 | RC_AA463445_at_NA_illumina   | Homo sapiens KIAA0439 mRNA, partial       | 3718.4275 |
| 8366 | X54162_at_GI_6912323-S       | 64 KD AUTOANTIGEN D1                      | 3718.62   |
| 8367 | Z21420_at_NA_illumina        | EST: H. sapiens putatively transcribed    | 3718.78   |
| 8368 | AB002303_at_GI_41281465-S    | KIAA0305 gene product                     | 3718.871  |
| 8369 | RC_AA045136_at_GI_38327514-S | EST: zk66e05.s1 Soares pregnant uterus    | 3719.2002 |
| 8370 | RC_AA234190_at_GI_40255256-S | EST: zr54f06.s1 Soares NhHMPu S1          | 3719.8215 |
| 8371 | R78309_at_NA_illumina        | EST: yi82b05.r1 Homo sapiens cDNA         | 3720.723  |
| 8372 | RC_AA621714_at_NA_illumina   | EST: af54e12.s1 Soares total fetus        | 3721.025  |
| 8373 | AA236384_at_NA_illumina      | EST: zr71a03.r1 Soares NhHMPu S1          | 3721.2507 |

|      |                                |                                             |           |
|------|--------------------------------|---------------------------------------------|-----------|
| 8374 | RC_AA424543_s_at_NA_illumina   | EST: zv91b10.s1 Soares NhHMPu S1            | 3722.044  |
| 8375 | J05257_at_GI_4758189-S         | DPEP1 Dipeptidase 1 (renal)                 | 3722.2222 |
| 8376 | AA393903_at_NA_illumina        | EST: zt85e04.r1 Soares testis NHT Homo      | 3723.2283 |
| 8377 | RC_AA609885_at_NA_illumina     | EST: af08d11.s1 Soares testis NHT Homo      | 3723.3472 |
| 8378 | RC_AA457718_at_GI_8393146-S    | EST: zx87d04.s1 Soares ovary tumor          | 3724.1235 |
| 8379 | J02906_at_GI_19743564-S        | CYTOCHROME P450 IIF1                        | 3725.8618 |
| 8380 | AA187579_at_GI_7662501-S       | EST: zp66d11.r1 Stratagene endothelial      | 3725.8691 |
| 8381 | D87462_at_GI_19718752-S        | KIAA0272 gene, partial cds                  | 3725.8982 |
| 8382 | W26520_at_GI_22748804-S        | EST: 32g10 Human retina cDNA randomly       | 3726.0442 |
| 8383 | X66364_at_GI_38454327-S        | mRNA PSSALRE for serine/threonine           | 3726.3235 |
| 8384 | X66364_at-2_NA_illumina        | Cyclin-dependent kinase 5                   | 3726.3235 |
| 8385 | RC_AA205803_at_GI_5453757-S    | Homo sapiens mRNA for nebulette             | 3727.5508 |
| 8386 | R87310_at_GI_13540512-S        | Yo46f11.r1 Homo sapiens cDNA clone          | 3728.2551 |
| 8387 | J00153_cds1_s_at_NA_illumina   | Hemoglobin, alpha 1::hemoglobin,            | 3728.5493 |
| 8388 | U09510_s_at_GI_6996009-S       | GARS Glycyl-tRNA synthetase                 | 3729.1821 |
| 8389 | U37143_at_GI_18491007-S        | CYP2J2 Cytochrome P450, subfamily IIJ       | 3729.2542 |
| 8390 | RC_AA487570_at_GI_14165459-A   | EST: ab23f04.s1 Stratagene lung             | 3729.4993 |
| 8391 | RC_AA458644_at_GI_19263346-S   | EST: aa16b12.s1 Soares NhHMPu S1            | 3729.9702 |
| 8392 | U70063_at_GI_30089927-A        | Acid ceramidase mRNA                        | 3730.0793 |
| 8393 | U48408_at_GI_16950629-A        | Kidney water channel (hKID) mRNA            | 3730.302  |
| 8394 | H81448_s_at_GI_13376022-S      | EST: yr75e04.r1 Homo sapiens cDNA           | 3730.5776 |
| 8395 | Z26248_s_at_GI_32261294-S      | PRG2 Proteoglycan 2, bone marrow            | 3730.639  |
| 8396 | RC_AA454940_at_GI_8923935-S    | EST: aa30c12.s1 NCI_CGAP_GCB1               | 3730.6477 |
| 8397 | W26634_at_NA_illumina          | EST: 34b10 Human retina cDNA randomly       | 3730.7324 |
| 8398 | L33243_at_GI_33359212-S        | PKD1 Polycystic kidney disease protein 1    | 3730.965  |
| 8399 | RC_AA457370_at_NA_illumina     | EST: aa86a10.s1 Stratagene fetal retina     | 3731.245  |
| 8400 | HG3730-HT4000_s_at_NA_illumina | Tyrosine Kinase Syk                         | 3731.3372 |
| 8401 | M24283_at_GI_4557877-S         | ICAM1 Intercellular adhesion molecule 1     | 3731.4722 |
| 8402 | D16480_at_GI_37059733-S        | HADHA Hydroxyacyl-Coenzyme A                | 3731.7656 |
| 8403 | RC_AA278860_at_GI_14249303-S   | EST: zs77h05.s1 NCI_CGAP_GCB1               | 3732.2036 |
| 8404 | W52889_at_GI_13514808-S        | DEAD/H (Asp-Glu-Ala-Asp/His) box            | 3732.5725 |
| 8405 | X51441_at_NA_illumina          | SERUM AMYLOID A PROTEIN                     | 3732.822  |
| 8406 | AA481595_at_NA_illumina        | EST: aa35e09.r1 NCI_CGAP_GCB1               | 3733.5996 |
| 8407 | M60891_s_at_NA_illumina        | Uroporphyrinogen decarboxylase (URO-D)      | 3734.096  |
| 8408 | U60062_at_NA_illumina          | FEZ1-T mRNA, alternatively spliced form     | 3734.286  |
| 8409 | U32989_at_GI_5032164-S         | Tryptophan oxygenase (TDO) mRNA             | 3734.4475 |
| 8410 | RC_AA457241_at_GI_6005783-S    | EST: aa91d04.s1 Stratagene fetal retina     | 3734.4692 |
| 8411 | RC_AA496951_at_GI_26787992-S   | EST: aa42e08.s1 Soares NhHMPu S1            | 3734.7317 |
| 8412 | RC_AA115535_at_GI_40807479-I   | EST: zl04g09.s1 Soares pregnant uterus      | 3735.751  |
| 8413 | AA194146_at_GI_42740892-I      | EST: zr37g05.r1 Soares NhHMPu S1            | 3735.9836 |
| 8414 | RC_AA292379_at_NA_illumina     | EST: zt51h09.s1 Soares ovary tumor          | 3737.0356 |
| 8415 | D49490_at_NA_illumina          | Protein disulfide isomerase-related protein | 3737.4075 |
| 8416 | RC_AA412122_i_at_NA_illumina   | Homo sapiens mRNA for putative RING         | 3737.557  |

|      |                              |                                           |           |
|------|------------------------------|-------------------------------------------|-----------|
| 8417 | AA399187_at_NA_illumina      | EST: zt52c01.r1 Soares ovary tumor        | 3738.4788 |
| 8418 | H72686_at_NA_illumina        | EST: yu03b11.r1 Homo sapiens cDNA         | 3738.4956 |
| 8419 | S85655_at_GI_6031190-S       | PHB Prohibitin                            | 3739.5667 |
| 8420 | U15637_s_at_GI_22027615-A    | CD40 receptor associated factor 1         | 3739.6604 |
| 8421 | U15637_s_at-2_NA_illumina    | TNF receptor-associated factor 3          | 3739.6604 |
| 8422 | X59065_at_GI_15055544-A      | FGF1 Fibroblast growth factor 1           | 3739.8696 |
| 8423 | RC_AA010530_at_NA_illumina   | Human BAC clone GS025M02 from 7q21-       | 3740.2898 |
| 8424 | W79060_at_NA_illumina        | EST: zd76h06.r1 Soares fetal heart        | 3740.4907 |
| 8425 | RC_AA256284_at_NA_illumina   | EST: zr79h01.s1 Soares NhHMPu S1          | 3741.088  |
| 8426 | R16442_at_NA_illumina        | EST: yf40g02.r1 Homo sapiens cDNA         | 3741.2168 |
| 8427 | S70585_rna1_at_GI_10800407-S | Thyroid-stimulating hormone alpha subunit | 3741.3335 |
| 8428 | RC_AA621485_at_NA_illumina   | KIAA0575 gene product                     | 3741.4116 |
| 8429 | U00115_at_GI_21040323-A      | BCL6 B cell lymphoma protein 6 (zinc      | 3741.7773 |
| 8430 | Z84718_cds1_at_GI_4504184-S  | GSTT1 gene extracted from Human DNA       | 3741.7944 |
| 8431 | X54457_s_at_GI_27894374-S    | CEL Carboxyl ester lipase (bile salt-     | 3741.943  |
| 8432 | U73514_at_GI_4758503-S       | Short-chain alcohol dehydrogenase         | 3742.2524 |
| 8433 | M25629_at_GI_22027643-S      | Kallikrein mRNA, clone clone phKK25       | 3742.32   |
| 8434 | AA454908_s_at_GI_37563604-S  | EST: zx79c12.r1 Soares ovary tumor        | 3742.437  |
| 8435 | L41939_at_GI_17975764-A      | Receptor protein-tyrosine kinase (HEK5)   | 3742.5435 |
| 8436 | L41939_at-2_NA_illumina      | EphB2                                     | 3742.5435 |
| 8437 | RC_AA190676_at_NA_illumina   | EST: zp89g09.s1 Stratagene HeLa cell s3   | 3743.3552 |
| 8438 | AA476564_s_at_NA_illumina    | EST: zx02f07.r1 Soares total fetus        | 3743.7551 |
| 8439 | AA149008_at_NA_illumina      | EST: zn99g10.r1 Stratagene colon          | 3743.9453 |
| 8440 | D11094_at_GI_24430152-S      | 26S PROTEASE REGULATORY                   | 3744.3613 |
| 8441 | RC_AA255966_at_NA_illumina   | EST: zs28g12.s1 NCI_CGAP_GCB1             | 3744.5667 |
| 8442 | RC_AA127946_at_GI_23238187-A | EST: zl13d08.s1 Soares pregnant uterus    | 3744.9702 |
| 8443 | H15203_at_GI_38327543-A      | EST: ym30d01.r1 Homo sapiens cDNA         | 3745.2095 |
| 8444 | RC_AA478112_at_NA_illumina   | EST: zt89e03.s1 Soares testis NHT Homo    | 3745.2776 |
| 8445 | RC_AA431462_at_NA_illumina   | EST: zw70g01.s1 Soares testis NHT         | 3745.4377 |
| 8446 | U29615_at_GI_4502808-S       | Chitotriosidase precursor mRNA            | 3745.718  |
| 8447 | D14838_at_GI_4503706-S       | FGF9 Fibroblast growth factor 9 (glia-    | 3745.8005 |
| 8448 | RC_AA406321_at_NA_illumina   | Homo sapiens mRNA for KIAA0895            | 3745.837  |
| 8449 | RC_AA055081_at_NA_illumina   | EST: zf19d02.s1 Soares fetal heart        | 3746.502  |
| 8450 | AA242904_at_GI_4506134-S     | Proline-rich Gla (G-carboxyglutamic acid) | 3746.9375 |
| 8451 | RC_AA430209_at_NA_illumina   | Homo sapiens LIM protein mRNA,            | 3747.1926 |
| 8452 | N88827_at_NA_illumina        | EST: K5685F Fetal heart, Lambda ZAP       | 3747.1958 |
| 8453 | AA402319_s_at_NA_illumina    | EST: zu46g05.r1 Soares ovary tumor        | 3747.3364 |
| 8454 | R60368_at_NA_illumina        | Yh04b02.r1 Homo sapiens cDNA clone        | 3747.7568 |
| 8455 | U16307_at_GI_5803150-S       | Glioma pathogenesis-related protein       | 3748.0608 |
| 8456 | X66899_at_GI_7669489-A       | EWSR1 Ewing sarcoma breakpoint region     | 3748.204  |
| 8457 | RC_AA436628_at_GI_24307960-S | KIAA0406 gene product                     | 3749.1287 |
| 8458 | RC_AA505063_at_NA_illumina   | KIAA0677 gene product                     | 3749.417  |
| 8459 | U46689_at_GI_4557302-S       | Microsomal aldehyde dehydrogenase         | 3750.2593 |

|      |                              |                                            |           |
|------|------------------------------|--------------------------------------------|-----------|
| 8460 | S43646_at_GI_4557702-S       | KERATIN, TYPE II CYTOSKELETAL 2            | 3750.3035 |
| 8461 | S43646_at-2_NA_illumina      | Cytokeratin 2 [human, epidermis, mRNA,     | 3750.3035 |
| 8462 | RC_AA436700_at_GI_16418376-S | EST: zv59c02.s1 Soares testis NHT Homo     | 3750.5574 |
| 8463 | U90918_at-2_NA_illumina      | Human clone 23654 mRNA sequence            | 3751.1677 |
| 8464 | U90918_at_NA_illumina        | Clone 23654 mRNA sequence                  | 3751.1677 |
| 8465 | W69866_s_at_GI_8922937-S     | EST: zd48e06.r1 Soares fetal heart         | 3751.2114 |
| 8466 | RC_AA496035_at_NA_illumina   | EST: zv72d06.s1 Soares total fetus         | 3751.2925 |
| 8467 | AA301376_at_GI_31377779-S    | EST: EST14332 Testis tumor Homo            | 3751.3103 |
| 8468 | W27560_at_NA_illumina        | EST: 34f7 Human retina cDNA randomly       | 3751.351  |
| 8469 | L10910_at_GI_35493837-A      | Splicing factor (CC1.3) mRNA               | 3751.4626 |
| 8470 | H43245_at_NA_illumina        | EST: yp05e07.r1 Homo sapiens cDNA          | 3752.8704 |
| 8471 | RC_AA621540_at_NA_illumina   | EST: af47b04.s1 Soares total fetus         | 3753.409  |
| 8472 | M25756_at_GI_10800415-S      | SECRETOGNANIN II PRECURSOR                 | 3753.4788 |
| 8473 | RC_AA476235_at_GI_7661621-S  | EST: zw35h03.s1 Soares ovary tumor         | 3753.9075 |
| 8474 | RC_AA435728_at_NA_illumina   | EST: zt79c01.s1 Soares testis NHT Homo     | 3753.9985 |
| 8475 | AA306768_at_GI_37594445-S    | EST: EST177700 Jurkat T-cells VI Homo      | 3754.1475 |
| 8476 | U14528_at_GI_4557538-S       | DTD Diastrophic dysplasia (sulfate         | 3754.7334 |
| 8477 | RC_AA133891_at_NA_illumina   | EST: zn86b06.s1 Stratagene lung            | 3755.2253 |
| 8478 | AA235147_at_GI_19923596-S    | EST: zs38c03.r1 Soares NhHMPu S1           | 3755.4307 |
| 8479 | X52056_at-2_NA_illumina      | Spleen focus forming virus (SFFV) proviral | 3755.4612 |
| 8480 | X52056_at_GI_4507174-S       | SPI1 Spleen focus forming virus (SFFV)     | 3755.4612 |
| 8481 | RC_AA279695_at_GI_4505278-A  | 5-methyltetrahydrofolate-homocysteine      | 3755.8638 |
| 8482 | C01790_at_GI_40254950-S      | EST: HUMGS0003746, Human Gene              | 3756.0137 |
| 8483 | H91867_at_NA_illumina        | Protein phosphatase 1, regulatory subunit  | 3756.0881 |
| 8484 | AA456865_at_GI_16445410-A    | Homo sapiens mRNA for candidate tumor      | 3756.0925 |
| 8485 | AA091085_at_GI_8922676-S     | Homo sapiens PAC clone DJ0905J08 from      | 3756.331  |
| 8486 | RC_AA287566_at_NA_illumina   | KIAA0187 gene product                      | 3756.5671 |
| 8487 | RC_AA465657_at_GI_31657124-A | EST: aa31b01.s1 NCI_CGAP_GCB1              | 3756.7231 |
| 8488 | R98073_at_NA_illumina        | EST: yr30b11.r1 Homo sapiens cDNA          | 3756.7349 |
| 8489 | RC_AA233935_at_GI_21536384-A | EST: zr49f12.s1 Soares NhHMPu S1           | 3757.1267 |
| 8490 | AA236843_s_at_NA_illumina    | EST: zr76h09.r1 Soares NhHMPu S1           | 3757.3035 |
| 8491 | RC_AA040050_at_NA_illumina   | EST: zk46b01.s1 Soares pregnant uterus     | 3757.3633 |
| 8492 | U33749_s_at_NA_illumina      | Transcription termination factor, RNA      | 3757.5933 |
| 8493 | RC_AA431461_at_NA_illumina   | EST: zw70f11.s1 Soares testis NHT Homo     | 3758.029  |
| 8494 | R51401_at_GI_20514779-A      | Homo sapiens chromosome 19, fosmid         | 3758.59   |
| 8495 | RC_AA026388_at_GI_7662311-S  | EST: ze92c03.s1 Soares fetal heart         | 3758.705  |
| 8496 | U54999_at_GI_34222312-S      | LGN protein mRNA                           | 3758.8955 |
| 8497 | U54999_at-2_NA_illumina      | Human LGN protein mRNA, complete cds       | 3758.8955 |
| 8498 | W19085_at_NA_illumina        | PROTEIN PHOSPHATASE INHIBITOR 2            | 3759.0874 |
| 8499 | RC_AA167269_at_NA_illumina   | EST: zp06c11.s1 Stratagene ovarian         | 3759.1157 |
| 8500 | M85276_at_GI_7108343-A       | NKG5 PROTEIN PRECURSOR                     | 3759.7405 |
| 8501 | RC_AA442763_at_GI_10938017-S | EST: zv60c04.s1 Soares testis NHT Homo     | 3759.931  |
| 8502 | RC_AA477330_at_GI_13375720-S | EST: zu36e01.s1 Soares ovary tumor         | 3760.4714 |

|      |                                |                                             |           |
|------|--------------------------------|---------------------------------------------|-----------|
| 8503 | RC_AA256376_s_at_NA_illumina   | Homo sapiens metaxin 2 (MTX2) mRNA,         | 3760.7993 |
| 8504 | AA287713_at_NA_illumina        | EST: zs53h01.r1 NCI_CGAP_GCB1 Homo          | 3760.8564 |
| 8505 | RC_AA495994_at_GI_23308518-S   | EST: zw06e06.s1 Soares NhHMPu S1            | 3761.3555 |
| 8506 | RC_AA227906_at_GI_24308084-S   | EST: zr57d06.s1 Soares NhHMPu S1            | 3761.9702 |
| 8507 | D61259_at_GI_33620740-S        | EST: Human fetal brain cDNA 5'-end GEN-     | 3762.602  |
| 8508 | HG2743-HT2845_at_NA_illumina   | Caldesmon 1, Alt. Splice 3, Non-Muscle      | 3762.697  |
| 8509 | X53587_at_GI_21361206-S        | ITGB4 Integrin beta-4 subunit               | 3762.8564 |
| 8510 | RC_AA187151_at_NA_illumina     | EST: zp62h07.s1 Stratagene endothelial      | 3763.2817 |
| 8511 | RC_AA291271_at_GI_40254828-S   | EST: zs18d05.s1 NCI_CGAP_GCB1               | 3763.3223 |
| 8512 | X57809_at_NA_illumina          | IGL@ Immunoglobulin lambda light chain      | 3763.5159 |
| 8513 | RC_AA418039_at_NA_illumina     | EST: zv97f03.s1 Soares NhHMPu S1            | 3764.8123 |
| 8514 | RC_AA134864_at_GI_31543288-S   | EST: zl19g12.s1 Soares pregnant uterus      | 3765.0928 |
| 8515 | X97231_f_at_NA_illumina        | Homo sapiens natural killer-associated      | 3765.2424 |
| 8516 | M34455_at_GI_38455405-S        | IDO Indole 2,3-dioxygenase                  | 3765.819  |
| 8517 | D83657_at_GI_5032058-S         | Calcium-binding protein in amniotic fluid 1 | 3765.856  |
| 8518 | R60100_at_NA_illumina          | EST: yh12d07.r1 Homo sapiens cDNA           | 3765.9688 |
| 8519 | RC_AA453524_at_NA_illumina     | Retinoblastoma-binding protein 4            | 3766.1287 |
| 8520 | D82345_at_NA_illumina          | NB thymosin beta                            | 3766.4888 |
| 8521 | RC_AA463624_at_NA_illumina     | EST: zx98g02.s1 Soares NhHMPu S1            | 3766.8726 |
| 8522 | RC_AA448212_at_GI_41327761-S   | Homo sapiens mRNA for KIAA0822              | 3766.9983 |
| 8523 | X55668_at_GI_7382457-S         | PRTN3 Proteinase 3 (serine proteinase,      | 3767.0513 |
| 8524 | HG1067-HT1067_r_at_NA_illumina | Mucin (Gb:M22406)                           | 3767.2659 |
| 8525 | R81830_at_GI_40807454-S        | Homo sapiens breast cancer putative         | 3767.7937 |
| 8526 | RC_AA074880_at_GI_38788332-S   | EST: zm85f12.s1 Stratagene ovarian          | 3768.2698 |
| 8527 | RC_AA262583_at_NA_illumina     | EST: zs22c11.s1 NCI_CGAP_GCB1               | 3768.3892 |
| 8528 | RC_AA608579_s_at_NA_illumina   | Paired-like homeodomain transcription       | 3768.6462 |
| 8529 | U46116_at-2_NA_illumina        | Protein tyrosine phosphatase, receptor      | 3768.7832 |
| 8530 | U46116_at_GI_18860897-S        | PTPRG Protein tyrosine phosphatase,         | 3768.7832 |
| 8531 | Z24725_at_GI_29789005-S        | Mitogen inducible gene mig-2                | 3768.8184 |
| 8532 | RC_AA243479_at_NA_illumina     | KIAA0397 gene product                       | 3768.9717 |
| 8533 | RC_AA448688_at_NA_illumina     | EST: zx11g04.s1 Soares total fetus          | 3770.7542 |
| 8534 | L77213_at_GI_20127505-S        | Phosphomevalonate kinase mRNA               | 3771.6326 |
| 8535 | L77864_at_GI_22035553-A        | Stat-like protein (Fe65) mRNA               | 3772.3787 |
| 8536 | RC_AA621188_at_NA_illumina     | EST: zu81a08.s1 Soares testis NHT Homo      | 3772.8474 |
| 8537 | AA458761_f_at_NA_illumina      | Transcription factor AP-2 alpha (activating | 3773.0044 |
| 8538 | U90546_at_GI_34932495-S        | Butyrophilin (BTF4) mRNA                    | 3773.0925 |
| 8539 | U90546_at-2_NA_illumina        | Human butyrophilin (BTF4) mRNA,             | 3773.0925 |
| 8540 | AA248582_at_GI_7662273-S       | KIAA0737 gene product                       | 3773.2585 |
| 8541 | L38490_s_at_GI_41327766-S      | ARF4L ADP-ribosylation factor 4-like        | 3773.2668 |
| 8542 | D89016_at_GI_15011976-S        | Neuroblastoma                               | 3773.3352 |
| 8543 | R21149_at_GI_13376305-S        | EST: yg55g09.r1 Homo sapiens cDNA           | 3773.4646 |
| 8544 | M18255_cds2_s_at_GI_40255270-S | PRKACB gene (protein kinase C-beta-2)       | 3773.6143 |
| 8545 | D57341_at_NA_illumina          | EST: Human aorta cDNA 5'-end GEN-           | 3773.8193 |

|      |                              |                                             |           |
|------|------------------------------|---------------------------------------------|-----------|
| 8546 | D83407_at_GI_5032234-S       | ZAK1-4 mRNA in human skin fibroblast        | 3774.2056 |
| 8547 | D49471_s_at_NA_illumina      | Endothelin converting enzyme 1              | 3774.3225 |
| 8548 | AA037285_at_GI_42822890-S    | Heterogeneous nuclear ribonucleoprotein     | 3774.6997 |
| 8549 | RC_AA599464_at_NA_illumina   | EST: ag26d02.s1 Jia bone marrow stroma      | 3775.371  |
| 8550 | X83228_at_NA_illumina        | LI-cadherin                                 | 3775.454  |
| 8551 | X95876_at_NA_illumina        | G-protein coupled receptor                  | 3776.1274 |
| 8552 | RC_AA436249_at_GI_27734934-S | EST: zv24g07.s1 Soares NhHMPu S1            | 3776.2532 |
| 8553 | Y00757_at_GI_4506916-S       | SGNE1 Secretory granule, neuroendocrine     | 3777.076  |
| 8554 | RC_AA283848_at_NA_illumina   | EST: zt19h06.s1 Soares ovary tumor          | 3777.473  |
| 8555 | X55740_at_GI_4505466-S       | NT5 5' nucleotidase (CD73)                  | 3777.8936 |
| 8556 | M83233_at_GI_4585865-S       | TCF12 Transcription factor 12 (HTF4, helix- | 3777.965  |
| 8557 | RC_AA446005_at_GI_37556073-S | EST: zw64f03.s1 Soares testis NHT Homo      | 3778.245  |
| 8558 | AA436102_at_NA_illumina      | EST: zu03b11.r1 Soares testis NHT Homo      | 3780.714  |
| 8559 | RC_AA228020_at_NA_illumina   | Splicing factor (CC1.3)                     | 3780.8662 |
| 8560 | T09191_at_NA_illumina        | Homo sapiens Luman mRNA, complete           | 3783.066  |
| 8561 | Z49269_at_NA_illumina        | Chemokine HCC-1                             | 3783.736  |
| 8562 | RC_AA188490_at_GI_41327684-S | EST: zq44d08.s1 Stratagene hNT neuron       | 3783.8909 |
| 8563 | RC_AA233609_s_at_NA_illumina | Homo sapiens spindle pole body protein      | 3784.5508 |
| 8564 | RC_AA253370_at_GI_31377836-S | EST: zr77b02.s1 Soares NhHMPu S1            | 3784.6057 |
| 8565 | AA092968_at_GI_33519472-S    | EST: m0992.seq.F Fetal heart, Lambda        | 3784.7795 |
| 8566 | N78066_at_NA_illumina        | EST: yv72a05.r1 Soares fetal liver spleen   | 3785.801  |
| 8567 | RC_AA404558_at_NA_illumina   | KIAA0740 gene product                       | 3786.1355 |
| 8568 | D87989_at_GI_5032212-S       | UDP-galactose transporter related           | 3786.525  |
| 8569 | RC_AA282406_at_NA_illumina   | EST: zs90e07.s1 NCI_CGAP_GCB1               | 3786.6187 |
| 8570 | M29474_at_GI_4557840-S       | Recombination activating protein (RAG-1)    | 3786.641  |
| 8571 | T66762_at_NA_illumina        | Homo sapiens clone 23914 mRNA               | 3787.8164 |
| 8572 | AA367473_at_NA_illumina      | Crystallin, beta B2                         | 3787.9617 |
| 8573 | M81883_at_GI_15451888-A      | GAD1 Glutamate decarboxylase 1 (brain,      | 3788.1877 |
| 8574 | AA448946_r_at_GI_25777625-A  | EST: zx07a10.r1 Soares total fetus          | 3789.175  |
| 8575 | AA114885_at_GI_22055650-S    | EST: zl03d09.r1 Soares pregnant uterus      | 3789.2485 |
| 8576 | RC_AA463697_s_at_NA_illumina | Carboxypeptidase D                          | 3789.5535 |
| 8577 | U62392_at_GI_21359880-S      | Homo sapiens zinc finger protein mRNA,      | 3790.3496 |
| 8578 | M69023_at_NA_illumina        | Globin gene                                 | 3791.2705 |
| 8579 | U87460_at_GI_31377788-S      | Putative endothelin receptor type B-like    | 3791.3816 |
| 8580 | AB000897_at_GI_14196456-A    | Cadherin FIB3, partial cds                  | 3791.5027 |
| 8581 | RC_AA447802_at_NA_illumina   | EST: aa20h07.s1 Soares NhHMPu S1            | 3791.5583 |
| 8582 | RC_AA099876_s_at_NA_illumina | EST: zl79a05.s1 Stratagene colon            | 3791.8508 |
| 8583 | RC_AA176607_at_NA_illumina   | EST: zp10e03.s1 Stratagene fetal retina     | 3792.262  |
| 8584 | M74905_s_at_NA_illumina      | N-methylpurine-DNA glycosylase              | 3792.5088 |
| 8585 | S50017_s_at_NA_illumina      | CNP 2',3'-cyclic nucleotide 3'              | 3793.4072 |
| 8586 | RC_AA482018_at_GI_37595552-S | EST: zu98e03.s1 NCI_CGAP_GCB1               | 3793.6846 |
| 8587 | RC_AA236241_at_GI_34147700-S | EST: zr51e07.s1 Soares NhHMPu S1            | 3793.6853 |
| 8588 | Z71389_rna1_s_at_NA_illumina | Defensin, beta 2                            | 3793.7903 |



|      |                               |                                           |           |
|------|-------------------------------|-------------------------------------------|-----------|
| 8589 | T48536_at_GI_14602458-S       | EST: hbc3204 Homo sapiens cDNA clone      | 3793.8174 |
| 8590 | AA402937_at_NA_illumina       | EST: zu53a10.r1 Soares ovary tumor        | 3793.8386 |
| 8591 | W37583_at_NA_illumina         | EST: zc10e03.r1 Soares parathyroid tumor  | 3794.3123 |
| 8592 | RC_AA610108_at_GI_22035675-S  | EST: af19g01.s1 Soares total fetus        | 3795.1165 |
| 8593 | RC_AA340539_at_NA_illumina    | EST: EST45795 Fetal kidney I Homo         | 3795.1375 |
| 8594 | L44374_at_GI_22749406-S       | EST: Homo sapiens thymus mRNA             | 3796.0032 |
| 8595 | AB002347_at_NA_illumina       | Human mRNA for KIAA0349 gene, partial     | 3796.177  |
| 8596 | RC_AA446459_at_GI_5453590-S   | EST: zw65b05.s1 Soares testis NHT         | 3796.2861 |
| 8597 | RC_AA179826_at_GI_24308389-S  | EST: zp53d11.s1 Stratagene NT2            | 3796.6196 |
| 8598 | AA351923_at_NA_illumina       | EST: EST59835 Infant brain Homo           | 3796.9092 |
| 8599 | H41842_at_GI_39930374-S       | EST: yo07d05.r1 Homo sapiens cDNA         | 3797.0493 |
| 8600 | D31352_at_NA_illumina         | EST: Human fetal-lung cDNA 5'-end         | 3797.5251 |
| 8601 | RC_AA258267_at_NA_illumina    | EST: zr60h08.s1 Soares NhHMPu S1          | 3797.6099 |
| 8602 | U61849_at_GI_4505442-S        | NPTX1 Neuronal pentraxin I                | 3797.861  |
| 8603 | D55869_s_at_GI_41327762-S     | EST: Human fetal brain cDNA 5'-end GEN-   | 3797.9146 |
| 8604 | L40395_at-2_NA_illumina       | Homo sapiens clone 23689 mRNA,            | 3798.0198 |
| 8605 | L40395_at_GI_7657057-S        | (clone S20iii15) mRNA, 3' end of cds      | 3798.0198 |
| 8606 | U78551_at_GI_37541581-S       | Gallbladder mucin MUC5B mRNA, partial     | 3798.5242 |
| 8607 | U78551_at-2_NA_illumina       | Homo sapiens gallbladder mucin MUC5B      | 3798.5242 |
| 8608 | X54867_s_at_NA_illumina       | NKG2-A AND NKG2-B TYPE II INTEGRAL        | 3798.5923 |
| 8609 | RC_AA165333_at_NA_illumina    | EST: zq49a01.s1 Stratagene hNT neuron     | 3799.775  |
| 8610 | AA040839_at_GI_21361410-S     | Homo sapiens putative 13 S Golgi          | 3800.1343 |
| 8611 | AA115334_at_NA_illumina       | EST: zl09c10.r1 Soares pregnant uterus    | 3800.3418 |
| 8612 | RC_AA460969_at_NA_illumina    | Transforming growth factor beta-activated | 3800.7278 |
| 8613 | RC_AA400047_at_GI_28872754-A  | EST: zu64a03.s1 Soares testis NHT Homo    | 3800.7505 |
| 8614 | M11433_at_GI_8400726-S        | RBP1 Cellular retinol-binding protein     | 3800.7766 |
| 8615 | RC_AA191454_at_GI_38683847-S  | FGF intracellular binding protein         | 3802.3364 |
| 8616 | U28686_at_GI_32261312-S       | Putative RNA binding protein RNPL mRNA    | 3802.6995 |
| 8617 | L48516_at_GI_29788995-S       | Paraoxonase 3 (PON3) mRNA, 3' end of      | 3802.8057 |
| 8618 | U77643_at_GI_4506868-S        | K12 protein precursor mRNA                | 3803.0278 |
| 8619 | U77643_at-2_NA_illumina       | Secreted and transmembrane 1              | 3803.0278 |
| 8620 | L24774_s_at_GI_4503266-S      | DCI Dodecenoyl-Coenzyme A delta           | 3804.0955 |
| 8621 | RC_AA236280_at_GI_24307970-S  | EST: zr51f08.s1 Soares NhHMPu S1          | 3804.109  |
| 8622 | AA251078_at_NA_illumina       | EST: zs01b12.r1 NCI_CGAP_GCB1 Homo        | 3804.3557 |
| 8623 | N98660_at_NA_illumina         | EST: yy66c03.r1 Homo sapiens cDNA         | 3804.4158 |
| 8624 | RC_AA417068_r_at_NA_illumina  | EST: zu13b04.s1 Soares testis NHT Homo    | 3804.6985 |
| 8625 | X02419_rna1_s_at_GI_4505862-S | UPA gene                                  | 3804.7727 |
| 8626 | RC_AA187133_at_NA_illumina    | EST: zp62b01.s1 Stratagene endothelial    | 3807.9143 |
| 8627 | X95240_s_at_GI_5174674-S      | Cysteine-rich secretory protein-3         | 3808.4148 |
| 8628 | AA203501_at_NA_illumina       | EST: zx59a01.r1 Soares fetal liver spleen | 3808.8525 |
| 8629 | S69790_at_GI_21237780-S       | Brush-1                                   | 3808.869  |
| 8630 | AA402006_at_NA_illumina       | EST: zt62f12.r1 Soares testis NHT Homo    | 3809.24   |
| 8631 | RC_AA252158_at_GI_23957697-S  | EST: zr64b12.s1 Soares NhHMPu S1          | 3810.2014 |

|      |                               |                                           |           |
|------|-------------------------------|-------------------------------------------|-----------|
| 8632 | X01388_at_GI_4557322-S        | APOC3 Apolipoprotein C-III                | 3810.517  |
| 8633 | AA442119_at_NA_illumina       | EST: zw55h09.r1 Soares total fetus        | 3810.5627 |
| 8634 | RC_AA256180_at_NA_illumina    | Dihydropyrimidinase-like 2                | 3810.8198 |
| 8635 | M64571_at_GI_14195629-A       | MAP4 Microtubule-associated protein 4     | 3810.9888 |
| 8636 | RC_AA398743_s_at_NA_illumina  | H.sapiens mRNA for imogen 38              | 3811.3237 |
| 8637 | RC_AA279483_at_NA_illumina    | EST: zs88h08.s1 NCI_CGAP_GCB1             | 3811.4377 |
| 8638 | RC_AA370091_f_at_NA_illumina  | EST: EST81710 Prostate gland I Homo       | 3811.5276 |
| 8639 | RC_AA608912_at_NA_illumina    | EST: af03a05.s1 Soares testis NHT Homo    | 3811.814  |
| 8640 | R84594_at_GI_14165471-S       | EST: yo37b10.r1 Homo sapiens cDNA         | 3812.0347 |
| 8641 | HG721-HT4827_s_at_NA_illumina | Placental Protein 14, Endometrial Alpha 2 | 3812.2444 |
| 8642 | RC_AA259062_at_GI_22035587-A  | EST: zs30h07.s1 NCI_CGAP_GCB1             | 3812.3704 |
| 8643 | RC_AA432270_at_GI_24371271-A  | EST: zw78f04.s1 Soares testis NHT Homo    | 3812.399  |
| 8644 | RC_AA400149_at_GI_38149839-A  | EST: zu69e04.s1 Soares testis NHT Homo    | 3812.412  |
| 8645 | J03278_at_GI_15451788-S       | PDGFRB Platelet-derived growth factor     | 3812.4578 |
| 8646 | RC_AA236482_at_NA_illumina    | EST: zr75d03.s1 Soares NhHMPu S1          | 3812.8008 |
| 8647 | AA130284_at_NA_illumina       | EST: zl29d04.r1 Soares pregnant uterus    | 3812.8367 |
| 8648 | RC_AA252289_at_GI_45269148-S  | EST: zr29d01.s1 Stratagene NT2 neuronal   | 3812.9287 |
| 8649 | U70136_at_GI_5031924-S        | THPO Thrombopoietin (myeloproliferative   | 3813.0789 |
| 8650 | M98343_at_NA_illumina         | Amplaxin (EMS1) mRNA                      | 3813.1797 |
| 8651 | S77154_s_at_GI_27894352-A     | TINUR                                     | 3813.4856 |
| 8652 | RC_AA278332_at_GI_40255193-S  | EST: zs80f06.s1 NCI_CGAP_GCB1 Homo        | 3813.6162 |
| 8653 | W29012_at_GI_21704285-S       | EST: 55a6 Human retina cDNA randomly      | 3813.8235 |
| 8654 | U12595_at_GI_7706484-S        | Tumor necrosis factor type 1 receptor     | 3814.1316 |
| 8655 | RC_AA608723_at_GI_37059748-S  | EST: ae56e04.s1 Stratagene lung           | 3815.0652 |
| 8656 | HG4716-HT5158_at_NA_illumina  | Guanosine 5'-Monophosphate Synthase       | 3815.2607 |
| 8657 | D82385_at_GI_37546881-S       | EST: similar to none, mRNA sequence.      | 3815.294  |
| 8658 | RC_AA459684_at_GI_8923764-S   | EST: zx49d08.s1 Soares testis NHT Homo    | 3815.3174 |
| 8659 | M21574_at_GI_15451787-S       | PDGFRA Platelet-derived growth factor     | 3815.3923 |
| 8660 | AA215915_at_GI_23111029-S     | EST: hp0084.seq.F Fetal heart, Lambda     | 3815.596  |
| 8661 | RC_AA490620_at_GI_11141876-S  | EST: aa47h07.s1 NCI_CGAP_GCB1             | 3816.4338 |
| 8662 | R39390_at_GI_38505208-S       | EST: yh95c06.r1 Homo sapiens cDNA         | 3816.4355 |
| 8663 | D89618_s_at_NA_illumina       | Karyopherin alpha 3 (importin alpha 4)    | 3816.634  |
| 8664 | RC_AA253471_at_GI_37546957-S  | EST: zr77g09.s1 Soares NhHMPu S1          | 3817.0195 |
| 8665 | RC_AA252033_at_GI_14149806-S  | EST: zr64h01.s1 Soares NhHMPu S1          | 3818.0635 |
| 8666 | U68142_at_NA_illumina         | RalGDS-like 2 (RGL2) mRNA, partial cds    | 3818.1072 |
| 8667 | AA054095_at_GI_30794371-A     | EST: zf50d08.r1 Soares retina N2b4HR      | 3818.6633 |
| 8668 | AA370960_at_NA_illumina       | Human tip associating protein (TAP)       | 3820.4417 |
| 8669 | D10495_at_GI_31377781-S       | PRKCD Protein kinase C, delta             | 3820.9033 |
| 8670 | AA059327_r_at_NA_illumina     | EST: zf65e11.r1 Soares retina N2b4HR      | 3823.0488 |
| 8671 | Z37544_rna1_s_at_NA_illumina  | Phospholipase C, beta 3                   | 3823.1533 |
| 8672 | RC_AA446027_s_at_NA_illumina  | Early growth response 2 (Krox-20)         | 3823.304  |
| 8673 | U92014_at-2_NA_illumina       | Human clone 121711 defective mariner      | 3823.8176 |
| 8674 | U92014_at_GI_41349440-A       | Clone 121711 defective mariner            | 3823.8176 |

|      |                                |                                              |           |
|------|--------------------------------|----------------------------------------------|-----------|
| 8675 | RC_AA406054_at_NA_illumina     | EST: zu65a10.s1 Soares testis NHT Homo       | 3823.821  |
| 8676 | U64998_at_GI_21314620-S        | Ribonuclease k6 precursor gene               | 3824.7566 |
| 8677 | AA315935_at_NA_illumina        | EST: EST187738 Colon carcinoma (HCC)         | 3825.3872 |
| 8678 | U79245_at_GI_38570143-S        | Clone 23586 mRNA sequence                    | 3826.377  |
| 8679 | M28219_at-2_NA_illumina        | Homo sapiens low density lipoprotein         | 3826.455  |
| 8680 | M28219_at_NA_illumina          | LDLR Low density lipoprotein receptor        | 3826.455  |
| 8681 | HG2797-HT2906_s_at_NA_illumina | Clathrin, Light Polypeptide B, Alt. Splice 2 | 3826.5564 |
| 8682 | RC_AA279808_at_NA_illumina     | Tissue inhibitor of metalloproteinase 1      | 3826.7651 |
| 8683 | RC_AA009489_at_GI_7706309-S    | EST: ze83e01.s1 Soares fetal heart           | 3826.9363 |
| 8684 | AA397670_at_GI_31543631-S      | EST: zt85h10.r1 Soares testis NHT Homo       | 3827.437  |
| 8685 | H82504_at_GI_4507690-S         | Transformation/transcription domain-         | 3828.4233 |
| 8686 | AA442400_at_GI_38788352-S      | Homo sapiens hepatitis B virus X             | 3828.5615 |
| 8687 | RC_AA465694_r_at_GI_33356147-S | Homo sapiens mRNA for C17orf1 protein        | 3828.6458 |
| 8688 | U89505_at_GI_4506444-S         | Hlark mRNA                                   | 3828.8894 |
| 8689 | RC_AA463875_at_NA_illumina     | Eukaryotic translation elongation factor 1   | 3828.902  |
| 8690 | RC_AA449306_at_NA_illumina     | EST: zx08c12.s1 Soares total fetus           | 3829.0837 |
| 8691 | RC_AA195399_at_GI_19923520-S   | EST: zp87f12.s1 Stratagene HeLa cell s3      | 3831.2505 |
| 8692 | J03507_at_GI_45580687-S        | C7 Complement component 7                    | 3831.3506 |
| 8693 | AA121001_at_GI_25777691-A      | EST: zl01a11.r1 Soares pregnant uterus       | 3831.7402 |
| 8694 | RC_AA461162_at_NA_illumina     | EST: zx70a05.s1 Soares total fetus           | 3832.2756 |
| 8695 | W27597_at_NA_illumina          | EST: 34h8 Human retina cDNA randomly         | 3832.4958 |
| 8696 | AA090670_at_GI_4757879-S       | BUB3 (budding uninhibited by                 | 3833.1436 |
| 8697 | U65676_at_GI_33286413-A        | HPS Hermansky-Pudlak syndrome protein        | 3833.8289 |
| 8698 | U65676_at-2_NA_illumina        | Hermansky-Pudlak syndrome                    | 3833.8289 |
| 8699 | RC_AA116075_at_NA_illumina     | EST: zm79e12.s1 Stratagene                   | 3833.8862 |
| 8700 | RC_AA232535_s_at_NA_illumina   | EST: zr24a12.s1 Stratagene NT2 neuronal      | 3834.3442 |
| 8701 | AA479503_at_NA_illumina        | EST: zv21e09.r1 Soares NhHMPu S1             | 3834.4214 |
| 8702 | D76444_at_GI_37595534-S        | Hkf-1 mRNA                                   | 3834.8276 |
| 8703 | X89750_at_GI_28178854-A        | TGIF protein                                 | 3835.2068 |
| 8704 | RC_AA227448_at_GI_24307966-S   | Homo sapiens mRNA for KIAA0456               | 3835.4536 |
| 8705 | RC_AA459420_at_GI_8923627-S    | EST: zx89h11.s1 Soares ovary tumor           | 3835.546  |
| 8706 | D89377_s_at_GI_27886556-S      | Adult tooth pulp of third molar fibroblast   | 3835.5955 |
| 8707 | D89377_s_at-2_NA_illumina      | Msh (Drosophila) homeo box homolog 2         | 3835.5955 |
| 8708 | AA452011_at_NA_illumina        | EST: zv75g06.r1 Soares total fetus           | 3835.8872 |
| 8709 | RC_AA476255_at_NA_illumina     | EST: zw44g07.s1 Soares total fetus           | 3835.9421 |
| 8710 | U09579_at_GI_17978496-A        | CDKN1A Cyclin-dependent kinase inhibitor     | 3836.6938 |
| 8711 | D14874_at_GI_4501944-S         | ADM Adrenomedullin                           | 3837.3455 |
| 8712 | M31724_at_GI_18104977-S        | PTPN1 Tyrosine phosphatase 1                 | 3837.483  |
| 8713 | RC_AA034947_at_NA_illumina     | EST: zk25e04.s1 Soares pregnant uterus       | 3837.7458 |
| 8714 | H10549_at_NA_illumina          | EST: ym04d04.r1 Homo sapiens cDNA            | 3838.171  |
| 8715 | AA295819_s_at_NA_illumina      | EST: EST101121 Thymus III Homo               | 3838.212  |
| 8716 | RC_AA234830_at_NA_illumina     | EST: zs38b03.s1 Soares NhHMPu S1             | 3838.2659 |
| 8717 | U39447_at_GI_6806883-S         | Placenta copper monamine oxidase             | 3838.548  |

|      |                                |                                          |           |
|------|--------------------------------|------------------------------------------|-----------|
| 8718 | AA195175_at_GI_4507544-S       | Transmembrane 7 superfamily member 1     | 3839.1387 |
| 8719 | RC_AA256604_at_NA_illumina     | EST: zr86g02.s1 Soares NhHMPu S1         | 3839.2144 |
| 8720 | D86966_at_NA_illumina          | KIAA0211 gene                            | 3839.5186 |
| 8721 | RC_AA227428_at_NA_illumina     | EST: zr03g08.s1 Stratagene NT2 neuronal  | 3839.7231 |
| 8722 | RC_AA011310_s_at_NA_illumina   | EST: ze22e11.s1 Soares fetal heart       | 3840.312  |
| 8723 | D86550_at_NA_illumina          | Serine/threonine protein kinase          | 3841.7595 |
| 8724 | R79265_at_NA_illumina          | EST: yi84b08.r1 Homo sapiens cDNA        | 3841.908  |
| 8725 | RC_AA404248_at_GI_15812187-A   | EST: zv63c08.s1 Soares total fetus       | 3841.915  |
| 8726 | D13631_s_at_GI_22027524-S      | KIAA0006 gene                            | 3842.3838 |
| 8727 | X52008_at_GI_40254460-S        | GLRA2 Glycine receptor, alpha 2          | 3842.8608 |
| 8728 | AA310301_at_NA_illumina        | KIAA0331 gene product                    | 3842.8726 |
| 8729 | T28246_at_NA_illumina          | Hepsin (transmembrane protease, serine   | 3843.0203 |
| 8730 | RC_AA432248_at_NA_illumina     | EST: zw78b02.s1 Soares testis NHT        | 3843.3127 |
| 8731 | D26362_at_GI_12408642-S        | KIAA0043 gene                            | 3844.5137 |
| 8732 | R19808_at_GI_9966876-S         | EST: yg37c11.r1 Homo sapiens cDNA        | 3844.9495 |
| 8733 | L21993_at_GI_25952130-S        | ADENYLATE CYCLASE, TYPE II               | 3845.3696 |
| 8734 | AA309880_at_GI_20127576-S      | EST: EST180743 Jurkat T-cells V Homo     | 3845.7366 |
| 8735 | M76180_at_GI_4503280-S         | DDC Dopa decarboxylase (aromatic L-      | 3846.609  |
| 8736 | RC_AA402982_f_at_NA_illumina   | EST: zu55a06.s1 Soares ovary tumor       | 3846.6526 |
| 8737 | R61448_at_GI_37540661-S        | EST: yh15a11.r1 Homo sapiens cDNA        | 3846.8118 |
| 8738 | RC_AA164543_s_at_NA_illumina   | EST: zo93c04.s1 Stratagene ovarian       | 3846.836  |
| 8739 | M92299_s_at_NA_illumina        | Homeo box B5                             | 3847.0955 |
| 8740 | D43950_at_GI_34147324-S        | T-COMPLEX PROTEIN 1, EPSILON             | 3847.4705 |
| 8741 | RC_AA401721_s_at_GI_45387954-  | EST: zt66c01.s1 Soares testis NHT Homo   | 3847.6729 |
| 8742 | AA378316_at_NA_illumina        | Homo sapiens clone 24736 mRNA            | 3848.3098 |
| 8743 | RC_AA157343_f_at_GI_34419646-S | EST: zo42h08.s1 Stratagene endothelial   | 3849.3806 |
| 8744 | RC_AA235980_at_GI_24307932-S   | EST: zs05e09.s1 NCI_CGAP_GCB1            | 3849.5469 |
| 8745 | AA002245_at_NA_illumina        | KIAA0663 gene product                    | 3849.6995 |
| 8746 | RC_AA609898_at_NA_illumina     | KIAA0598 gene product                    | 3849.7327 |
| 8747 | W31738_s_at_GI_34222139-S      | EST: zb93b06.r1 Soares parathyroid tumor | 3850.6484 |
| 8748 | T95377_at_NA_illumina          | EST: ye43c01.r1 Homo sapiens cDNA        | 3851.1494 |
| 8749 | H49499_s_at_NA_illumina        | Homo sapiens chromosome 19, cosmid       | 3851.2068 |
| 8750 | RC_AA449199_at_NA_illumina     | EST: zx03h03.s1 Soares total fetus       | 3851.936  |
| 8751 | RC_AA278598_at_GI_32306535-S   | EST: zs78g05.s1 NCI_CGAP_GCB1            | 3851.9607 |
| 8752 | RC_AA234931_at_GI_24308254-S   | EST: zr78h01.s1 Soares NhHMPu S1         | 3852.1267 |
| 8753 | AB002293_at_NA_illumina        | Human mRNA for KIAA0295 gene, partial    | 3852.3613 |
| 8754 | W37398_at_NA_illumina          | EST: zc11a10.r1 Soares parathyroid tumor | 3854.3628 |
| 8755 | S72024_s_at_NA_illumina        | EIF5A Eukaryotic translation initiation  | 3855.1704 |
| 8756 | RC_AA258063_at_NA_illumina     | EST: zs76c11.s1 NCI_CGAP_GCB1            | 3855.603  |
| 8757 | W58049_at_GI_9966778-S         | EST: zd22c11.r1 Soares fetal heart       | 3856.2478 |
| 8758 | RC_AA463979_at_GI_21264595-A   | Homo sapiens mRNA for KIAA0782           | 3857.5085 |
| 8759 | AA151328_at_GI_30240931-S      | Human Hpast (HPAST) mRNA, complete       | 3857.7307 |
| 8760 | RC_AA398316_s_at_NA_illumina   | EST: zt47d08.s1 Soares ovary tumor       | 3857.9827 |

|      |                                |                                           |           |
|------|--------------------------------|-------------------------------------------|-----------|
| 8761 | RC_AA150619_at_NA_illumina     | EST: zl46a03.s1 Soares pregnant uterus    | 3858.047  |
| 8762 | AA284709_at_GI_22547137-A      | Kallikrein 3, (prostate specific antigen) | 3858.473  |
| 8763 | RC_AA453032_at_GI_11415045-S   | Homo sapiens 4F5S mRNA, complete cds      | 3858.9795 |
| 8764 | AA091772_at_NA_illumina        | EST: m1701.seq.F Fetal heart, Lambda      | 3859.3457 |
| 8765 | RC_AA195077_at_GI_33636749-S   | EST: zr35g12.s1 Soares NhHMPu S1          | 3859.9136 |
| 8766 | X99142_at_GI_15431325-S        | Hair keratin, hHb6                        | 3860.0261 |
| 8767 | RC_AA488199_at_GI_39777611-A   | EST: ad08f06.s1 Soares NbHFB Homo         | 3860.0818 |
| 8768 | M28825_at_GI_27764864-S        | CD1A CD1a antigen (thymocyte antigen)     | 3860.4087 |
| 8769 | RC_AA171736_at_GI_4505120-S    | EST: zo97h05.s1 Stratagene ovarian        | 3860.5637 |
| 8770 | AA234634_f_at_NA_illumina      | CCAAT/enhancer binding protein (C/EBP),   | 3861.0066 |
| 8771 | M16276_at_NA_illumina          | HLA-DQB1 Major histocompatibility         | 3861.1128 |
| 8772 | RC_AA447120_at_NA_illumina     | EST: zw93b05.s1 Soares total fetus        | 3862.1562 |
| 8773 | AA434196_at_NA_illumina        | A disintegrin and metalloproteinase       | 3862.4424 |
| 8774 | HG4660-HT5073_at_NA_illumina   | Microtubule-Associated Protein 1b         | 3863.4248 |
| 8775 | U03105_at_GI_5802981-S         | B4-2 protein mRNA                         | 3863.9778 |
| 8776 | RC_AA621277_at_NA_illumina     | EST: zu83d08.s1 Soares testis NHT Homo    | 3864.3027 |
| 8777 | RC_AA401098_r_at_NA_illumina   | EST: zu50g01.s1 Soares ovary tumor        | 3864.3542 |
| 8778 | U11862_s_at_GI_4501850-S       | ABP1 Amiloride binding protein 1 (amine   | 3864.6436 |
| 8779 | AA429784_at_NA_illumina        | Homo sapiens mRNA for KIAA0717            | 3864.6968 |
| 8780 | RC_AA255490_at_NA_illumina     | EST: zr83d10.s1 Soares NhHMPu S1          | 3864.8696 |
| 8781 | RC_AA456136_at_NA_illumina     | EST: zx65f04.s1 Soares total fetus        | 3864.8704 |
| 8782 | RC_AA258482_s_at_NA_illumina   | Homo sapiens mRNA for zinc finger         | 3865.3406 |
| 8783 | RC_AA609943_at_NA_illumina     | EST: af09d11.s1 Soares testis NHT Homo    | 3865.5684 |
| 8784 | RC_AA404342_at_NA_illumina     | EST: zv63b12.s1 Soares total fetus        | 3865.7937 |
| 8785 | RC_AA055932_at_GI_21269865-S   | EST: zf20h01.s1 Soares fetal heart        | 3865.9973 |
| 8786 | RC_AA233317_at_GI_5453925-S    | EST: zr69h02.s1 Soares NhHMPu S1          | 3866.0535 |
| 8787 | U36787_at-2_NA_illumina        | Holocytochrome c synthase (cytochrome c   | 3866.1748 |
| 8788 | U36787_at_GI_4885400-S         | Putative holocytochrome c-type synthetase | 3866.1748 |
| 8789 | RC_AA424517_at_GI_23397476-S   | EST: zv90f06.s1 Soares NhHMPu S1          | 3867.0073 |
| 8790 | X59350_at_GI_4502650-S         | CD22 CD22 antigen                         | 3867.2373 |
| 8791 | X02596_at_GI_11038640-A        | Bcr (breakpoint cluster region) gene in   | 3867.4507 |
| 8792 | RC_AA022634_f_at_GI_44889413-S | UBIQUITIN CARBOXYL-TERMINAL               | 3868.373  |
| 8793 | RC_AA459939_at_NA_illumina     | KIAA0710 gene product                     | 3869.4526 |
| 8794 | AA427379_at_NA_illumina        | EST: zw52h08.r1 Soares total fetus        | 3869.5251 |
| 8795 | D79994_at_GI_23510374-A        | KIAA0172 gene, partial cds                | 3869.7686 |
| 8796 | RC_AA480885_s_at_NA_illumina   | EST: aa28d02.s1 NCI_CGAP_GCB1             | 3870.206  |
| 8797 | W27984_at_NA_illumina          | EST: 40f11 Human retina cDNA randomly     | 3870.2188 |
| 8798 | RC_AA490828_at_NA_illumina     | GLYCERALDEHYDE 3-PHOSPHATE                | 3871.628  |
| 8799 | AA093725_at_GI_22212942-S      | EST: cl0709.seq.F Fetal heart, Lambda     | 3872.1746 |
| 8800 | RC_AA425304_at_NA_illumina     | EST: zw46b07.s1 Soares total fetus        | 3873.5164 |
| 8801 | AA288018_at_GI_21071072-A      | EST: zs55f08.r1 NCI_CGAP_GCB1 Homo        | 3873.7773 |
| 8802 | U05340_at_GI_4557436-S         | P55CDC mRNA                               | 3874.2341 |
| 8803 | W03592_at_NA_illumina          | KIAA0719 gene product                     | 3874.2954 |

|      |                              |                                             |           |
|------|------------------------------|---------------------------------------------|-----------|
| 8804 | AA448497_at_GI_10947033-S    | Homo sapiens Mad4 homolog (Mad4)            | 3874.5703 |
| 8805 | S62907_s_at_GI_4557600-S     | Gamma-aminobutyric acidA receptor alpha     | 3875.9727 |
| 8806 | S62907_s_at-2_NA_illumina    | Gamma-aminobutyric acid (GABA) A            | 3875.9727 |
| 8807 | AA286697_at_NA_illumina      | Major histocompatibility complex, class II, | 3876.4075 |
| 8808 | N44756_at_NA_illumina        | EST: yy38c09.r1 Homo sapiens cDNA           | 3876.702  |
| 8809 | RC_AA280213_at_GI_26051274-S | EST: zt10b01.s1 NCI_CGAP_GCB1 Homo          | 3877.3674 |
| 8810 | RC_AA416551_at_GI_21362053-S | EST: zu05e01.s1 Soares testis NHT Homo      | 3877.4739 |
| 8811 | RC_AA412178_at_NA_illumina   | EST: zt93d11.s1 Soares testis NHT Homo      | 3877.7922 |
| 8812 | M13686_s_at_NA_illumina      | PULMONARY SURFACTANT-                       | 3878.5308 |
| 8813 | HG2274-HT2370_at_NA_illumina | Rna Polymerase li, 14.5 Kda Subunit         | 3879.4834 |
| 8814 | RC_AA417558_at_GI_34147692-S | EST: zv04d02.s1 Soares NhHMPu S1            | 3880.4856 |
| 8815 | RC_AA454745_at_GI_23510282-S | EST: zx77e03.s1 Soares ovary tumor          | 3880.5117 |
| 8816 | H83573_r_at_NA_illumina      | Tumor protein D52-like 2                    | 3880.702  |
| 8817 | X16546_at_GI_45243468-S      | RNS2 Ribonuclease 2 (eosinophil-derived     | 3882.436  |
| 8818 | W26505_at_NA_illumina        | Human low-Mr GTP-binding protein            | 3882.7627 |
| 8819 | L14848_s_at-2_NA_illumina    | MHC class I polypeptide-related sequence    | 3883.0781 |
| 8820 | L14848_s_at_NA_illumina      | MHC class I-related protein mRNA            | 3883.0781 |
| 8821 | RC_AA399634_at_GI_40255100-S | EST: zt93e08.s1 Soares testis NHT Homo      | 3884.07   |
| 8822 | RC_AA130606_at_NA_illumina   | KIAA0432 gene product                       | 3884.318  |
| 8823 | AA436536_at_GI_19924160-A    | RPB5-mediating protein                      | 3884.6335 |
| 8824 | AB002370_at_GI_41281422-S    | KIAA0372 gene product                       | 3884.7017 |
| 8825 | R68884_at_GI_24431968-S      | EST: yi37f04.r1 Homo sapiens cDNA clone     | 3884.985  |
| 8826 | RC_AA151333_at_GI_12545383-S | EST: zl41c12.s1 Soares pregnant uterus      | 3885.3774 |
| 8827 | X79067_at_NA_illumina        | ERF-1 mRNA 3' end                           | 3885.4573 |
| 8828 | RC_AA001936_at_NA_illumina   | EST: zh86b04.s1 Soares fetal liver spleen   | 3885.8594 |
| 8829 | N34096_at_GI_33359690-A      | Ubiquitin-conjugating enzyme E2E 1          | 3886.0571 |
| 8830 | RC_AA112287_at_NA_illumina   | EST: zn68c05.s1 Stratagene HeLa cell s3     | 3886.2986 |
| 8831 | Z21081_at_NA_illumina        | EST: H. sapiens putatively transcribed      | 3886.4485 |
| 8832 | RC_AA039887_at_NA_illumina   | EST: zk45d03.s1 Soares pregnant uterus      | 3886.9602 |
| 8833 | RC_AA449772_at_NA_illumina   | EST: zx07h06.s1 Soares total fetus          | 3886.9946 |
| 8834 | AA305210_at_GI_8923445-S     | EST: EST176203 Colon carcinoma (Caco-       | 3887.0447 |
| 8835 | AA040512_at_NA_illumina      | Homo sapiens KIAA0431 mRNA, partial         | 3888.616  |
| 8836 | RC_AA454667_at_GI_40254451-S | EST: zx99h03.s1 Soares NhHMPu S1            | 3888.616  |
| 8837 | RC_AA121360_s_at_NA_illumina | EST: zn77a05.s1 Stratagene NT2              | 3889.008  |
| 8838 | RC_AA488886_at_NA_illumina   | EST: aa55f12.s1 NCI_CGAP_GCB1 Homo          | 3890.6746 |
| 8839 | L03411_s_at_GI_20631983-S    | RD Radin blood group                        | 3890.8804 |
| 8840 | D80006_at_NA_illumina        | KIAA0184 gene, partial cds                  | 3890.887  |
| 8841 | RC_AA128997_at_GI_4505674-S  | Phosphodiesterase 9A                        | 3891.9915 |
| 8842 | AA116016_at_GI_11321641-S    | Human DNA sequence from clone 522J7         | 3892.2288 |
| 8843 | RC_AA460343_at_NA_illumina   | EST: zx66g04.s1 Soares total fetus          | 3894.3352 |
| 8844 | M34423_at_GI_10834965-S      | GLB1 Beta-D-galactosidase                   | 3894.492  |
| 8845 | U03100_at_GI_4503126-S       | CTNNA1 Catenin (cadherin-associated         | 3894.7231 |
| 8846 | AA402119_at_NA_illumina      | SET binding factor 1                        | 3895.4717 |

|      |                                |                                           |           |
|------|--------------------------------|-------------------------------------------|-----------|
| 8847 | AA405781_s_at_GI_20127635-S    | EST: zu66d03.r1 Soares testis NHT Homo    | 3895.9663 |
| 8848 | AA393581_at_NA_illumina        | Human thioredoxin mRNA, nuclear gene      | 3896.6099 |
| 8849 | M93405_at_GI_25777737-S        | Methylmalonate semialdehyde               | 3897.802  |
| 8850 | U90913_at_NA_illumina          | Clone 23665 mRNA sequence                 | 3898.2983 |
| 8851 | RC_AA055992_at_NA_illumina     | EST: zf22b01.s1 Soares fetal heart        | 3898.4094 |
| 8852 | U02619_at_GI_4753160-S         | TFIIIC Box B-binding subunit mRNA         | 3898.8223 |
| 8853 | RC_AA425439_at_GI_19923369-S   | Homo sapiens HRIHFB2060 mRNA,             | 3898.8267 |
| 8854 | HG3395-HT3573_s_at_NA_illumina | Dnaj Homolog (Gb:X63368), Alt. Splice     | 3899.1938 |
| 8855 | RC_AA431426_at_NA_illumina     | Human placenta (Diff33) mRNA, complete    | 3899.2878 |
| 8856 | RC_AA398421_s_at_NA_illumina   | Homo sapiens mRNA, chromosome 1           | 3899.4773 |
| 8857 | AA095059_at_NA_illumina        | Homo sapiens mRNA for KIAA0826            | 3900.4478 |
| 8858 | AA406087_s_at_GI_13540575-S    | TAL1 (SCL) interrupting locus             | 3901.365  |
| 8859 | D13243_s_at_NA_illumina        | Pyruvate kinase, liver and RBC            | 3901.4873 |
| 8860 | RC_AA451695_at_NA_illumina     | EST: zx44d06.s1 Soares total fetus        | 3901.6982 |
| 8861 | RC_D59420_at_GI_37544698-S     | Homo sapiens mRNA for KIAA0865            | 3902.4688 |
| 8862 | M64788_at_GI_4506414-S         | RAP1GA1 RAP1, GTPase activating           | 3902.5142 |
| 8863 | M37400_at_GI_4504066-S         | GOT1 Glutamic-oxaloacetic transaminase    | 3902.5303 |
| 8864 | RC_AA456583_s_at_NA_illumina   | Human PL6 protein (PL6) mRNA,             | 3902.7798 |
| 8865 | A28102_at_GI_34734069-S        | GABAa receptor alpha-3 subunit            | 3903.4038 |
| 8866 | AA362594_s_at_GI_20336263-A    | Human Chromosome 16 BAC clone             | 3903.7812 |
| 8867 | W39618_at_NA_illumina          | EST: zc18h10.r1 Soares parathyroid tumor  | 3904.8706 |
| 8868 | U59877_s_at_GI_33589860-S      | Low-Mr GTP-binding protein (RAB31)        | 3905.2634 |
| 8869 | AA174202_at_GI_13027601-S      | EST: PTH275 HTCDL1 Homo sapiens           | 3905.3538 |
| 8870 | L34155_at_GI_38045907-A        | Laminin-related protein (LamA3) mRNA      | 3905.827  |
| 8871 | L34155_at-2_NA_illumina        | Laminin, alpha 3 (nicein (150kD), kalinin | 3905.827  |
| 8872 | N77326_at_GI_41393565-S        | EST: yv43h06.r1 Homo sapiens cDNA         | 3907.01   |
| 8873 | Y08999_at_GI_22907051-S        | Sop2p-like protein                        | 3907.6553 |
| 8874 | AF007165_at_GI_38016944-S      | Homo sapiens nuclear DEAF-1 related       | 3907.7998 |
| 8875 | AB002319_at_GI_38202204-S      | Human mRNA for KIAA0321 gene, partial     | 3908.2974 |
| 8876 | AB002297_at_GI_40254811-S      | Dedicator of cyto-kinesis 3               | 3908.571  |
| 8877 | RC_AA486183_at_NA_illumina     | EST: ab35a02.s1 Stratagene HeLa cell s3   | 3910.1282 |
| 8878 | RC_AA282206_at_GI_13375737-S   | EST: zt12a07.s1 NCI_CGAP_GCB1 Homo        | 3910.137  |
| 8879 | AA169543_at_GI_31343491-S      | EST: zo89b04.r1 Stratagene ovarian        | 3911.2922 |
| 8880 | D78680_at_NA_illumina          | EST: Human placenta cDNA 5'-end GEN-      | 3912.131  |
| 8881 | RC_AA257971_at_NA_illumina     | EST: zs34d12.s1 NCI_CGAP_GCB1             | 3914.6157 |
| 8882 | RC_AA609151_at_NA_illumina     | Dual-specificity tyrosine-(Y)-            | 3914.6611 |
| 8883 | X52001_at_GI_4557544-S         | EDN3 Endothelin 3                         | 3914.6804 |
| 8884 | H10551_at_GI_41281508-S        | KIAA0735 gene product                     | 3915.3176 |
| 8885 | RC_AA216759_at_NA_illumina     | EST: zq96b03.s1 Stratagene NT2            | 3916.6138 |
| 8886 | RC_AA446618_at_NA_illumina     | EST: zw85h03.s1 Soares total fetus        | 3917.1665 |
| 8887 | AA451640_at_GI_14249519-S      | EST: zx43d06.r1 Soares total fetus        | 3917.2034 |
| 8888 | D63479_s_at_GI_25777595-A      | DAGK4 Diacylglycerol kinase delta         | 3917.5422 |
| 8889 | N41608_at_NA_illumina          | Ribosomal protein L37                     | 3919.1763 |

|      |                              |                                           |           |
|------|------------------------------|-------------------------------------------|-----------|
| 8890 | L22342_at_GI_17986251-A      | Nuclear phosphoprotein mRNA               | 3919.8374 |
| 8891 | RC_AA411443_at_GI_23943913-S | EST: zv30d08.s1 Soares ovary tumor        | 3919.9473 |
| 8892 | AA045930_at_GI_34577054-S    | EST: zk75c03.r1 Soares pregnant uterus    | 3920.6218 |
| 8893 | RC_AA233143_at_GI_23503272-S | EST: zr47g11.s1 Soares NhHMPu S1          | 3920.822  |
| 8894 | RC_AA211381_at_NA_illumina   | EST: zq88b03.s1 Stratagene hNT neuron     | 3921.4834 |
| 8895 | AA459542_s_at_GI_19924155-A  | Regulatory factor X-associated ankyrin-   | 3921.525  |
| 8896 | RC_AA521454_at_NA_illumina   | EST: aa69e04.s1 NCI_CGAP_GCB1             | 3921.8687 |
| 8897 | AA478936_at_GI_31982907-S    | Zinc finger protein 143 (clone pHZ-1)     | 3921.8887 |
| 8898 | C02374_s_at_NA_illumina      | EST: HUMGS0009780, Human Gene             | 3922.0906 |
| 8899 | AA444115_at_NA_illumina      | EST: zv51b08.r1 Soares testis NHT Homo    | 3923.089  |
| 8900 | Z29083_at_GI_34222307-S      | 5T4 gene for 5T4 Oncofetal antigen        | 3923.2588 |
| 8901 | D44466_at_GI_25777599-S      | Proteasome subunit p112                   | 3924.2224 |
| 8902 | RC_AA443841_at_GI_22209007-S | Homo sapiens Sprouty 2 (SPRY2) mRNA,      | 3924.3093 |
| 8903 | AA479266_at_GI_13376209-S    | EST: zv17h06.r1 Soares NhHMPu S1          | 3925.278  |
| 8904 | L19314_at_GI_8400709-S       | HRY gene                                  | 3925.564  |
| 8905 | T30341_s_at_NA_illumina      | Human Chromosome 16 BAC clone             | 3925.5771 |
| 8906 | U14588_at_GI_4506344-S       | Paxillin mRNA                             | 3925.6123 |
| 8907 | AA156925_at_NA_illumina      | EST: zl20g03.r1 Soares pregnant uterus    | 3926.4622 |
| 8908 | W24360_at_NA_illumina        | Interleukin 7 receptor                    | 3926.7634 |
| 8909 | RC_AA412520_at_NA_illumina   | EST: zt97f09.s1 Soares testis NHT Homo    | 3927.4773 |
| 8910 | RC_AA491299_at_NA_illumina   | EST: aa53d06.s1 NCI_CGAP_GCB1             | 3928.497  |
| 8911 | H85169_at_NA_illumina        | Ys67c08.r1 Homo sapiens cDNA clone        | 3929.0232 |
| 8912 | RC_AA211396_at_NA_illumina   | EST: zq88d01.s1 Stratagene hNT neuron     | 3929.3296 |
| 8913 | RC_AA121127_at_GI_9910241-S  | EST: zl88d01.s1 Stratagene colon          | 3930.187  |
| 8914 | RC_AA410338_at_NA_illumina   | EST: zv16e02.s1 Soares NhHMPu S1          | 3930.5012 |
| 8915 | AA477375_s_at_NA_illumina    | Homo sapiens clone 640 unknown mRNA,      | 3931.111  |
| 8916 | D90086_at_GI_4505686-S       | PDHB Pyruvate dehydrogenase               | 3931.1995 |
| 8917 | M36542_s_at_GI_4505958-S     | POU2F2 POU domain, class 2,               | 3931.3777 |
| 8918 | AA093862_at_GI_21450855-A    | EST: cl1256.seq.F Fetal heart, Lambda     | 3931.5615 |
| 8919 | X62153_s_at_NA_illumina      | MCM3 Minichromosome maintenance           | 3931.641  |
| 8920 | U90336_at_GI_33354284-S      | PEG3 mRNA, partial cds                    | 3931.825  |
| 8921 | RC_AA055809_at_NA_illumina   | EST: zl76c05.s1 Stratagene colon          | 3932.0227 |
| 8922 | D10537_s_at_GI_39725669-S    | MPZ Myelin protein zero (Charcot-Marie-   | 3932.962  |
| 8923 | D10537_s_at-2_NA_illumina    | Myelin protein zero (Charcot-Marie-Tooth  | 3932.962  |
| 8924 | X52192_at_GI_13376997-S      | FES Feline sarcoma (Snyder-Theilen) viral | 3933.0984 |
| 8925 | RC_AA349612_s_at_NA_illumina | KIAA0305 gene product                     | 3933.295  |
| 8926 | U06631_at_NA_illumina        | IEF SSP 9502 mRNA                         | 3933.793  |
| 8927 | RC_AA424802_at_NA_illumina   | EST: zw04d12.s1 Soares NhHMPu S1          | 3933.8267 |
| 8928 | W89059_at_NA_illumina        | EST: zh70b05.r1 Soares fetal liver spleen | 3934.3005 |
| 8929 | AA227621_at_GI_42659838-S    | EST: zr57e11.r1 Soares NhHMPu S1          | 3934.3115 |
| 8930 | RC_AA284354_at_NA_illumina   | EST: zs56h04.s1 NCI_CGAP_GCB1             | 3935.126  |
| 8931 | X77588_s_at_NA_illumina      | GNAS1 Guanine nucleotide binding          | 3935.4602 |
| 8932 | D79985_at_GI_4826693-S       | A cell surface protein                    | 3935.8687 |



|      |                                |                                           |           |
|------|--------------------------------|-------------------------------------------|-----------|
| 8933 | U79261_s_at_GI_21237774-A      | Clone 23959 mRNA, partial cds             | 3935.9297 |
| 8934 | RC_AA284844_at_GI_25092657-S   | EST: zt22d02.s1 Soares ovary tumor        | 3936.665  |
| 8935 | RC_AA084602_at_NA_illumina     | EST: zn19g04.s1 Stratagene                | 3937.0322 |
| 8936 | X57985_rna2_at_GI_22027639-S   | GL105 gene (histone H2B) extracted from   | 3938.0046 |
| 8937 | HG2755-HT2862_at_NA_illumina   | T-Plastin                                 | 3938.2075 |
| 8938 | M13829_s_at_NA_illumina        | PKS PROTO-ONCOGENE                        | 3938.4292 |
| 8939 | W76492_at_GI_34916054-S        | EST: zd67d01.r1 Soares fetal heart        | 3938.671  |
| 8940 | RC_AA609185_at_NA_illumina     | EST: af12c06.s1 Soares testis NHT Homo    | 3939.4321 |
| 8941 | K03189_f_at_NA_illumina        | Chorionic gonadotropin (hcg) beta subunit | 3940.0632 |
| 8942 | U82468_at-2_NA_illumina        | Tubby like protein 1                      | 3940.1248 |
| 8943 | U82468_at_GI_6715609-S         | Tubby related protein 1 (TULP1) mRNA      | 3940.1248 |
| 8944 | RC_AA279785_at_NA_illumina     | EST: zs87e12.s1 NCI_CGAP_GCB1             | 3940.159  |
| 8945 | AA028171_at_GI_33946300-S      | EST: ze75h09.r1 Soares fetal heart        | 3940.5164 |
| 8946 | RC_AA047437_at_NA_illumina     | EST: zk73a08.s1 Soares pregnant uterus    | 3940.8433 |
| 8947 | L09260_at_GI_34335133-A        | (chromosome 3p25) membrane protein        | 3941.1323 |
| 8948 | RC_AA278678_at_NA_illumina     | EST: zs77d12.s1 NCI_CGAP_GCB1             | 3941.225  |
| 8949 | M60502_at_NA_illumina          | Filaggrin                                 | 3942.513  |
| 8950 | M71243_f_at_NA_illumina        | Glycophorin Sta type A (HGpSta(A)) gene,  | 3942.69   |
| 8951 | RC_AA258860_at_GI_34305296-A   | EST: zs34g02.s1 NCI_CGAP_GCB1             | 3942.8313 |
| 8952 | RC_AA417569_f_at_GI_4758079-S  | EST: zv04e06.s1 Soares NhHMPu S1          | 3943.2969 |
| 8953 | RC_AA417373_at_GI_37675281-S   | EST: zu05a12.s1 Soares testis NHT Homo    | 3943.625  |
| 8954 | AF009674_at_GI_31083143-A      | Axin (AXIN) mRNA, partial cds             | 3943.8335 |
| 8955 | AF009674_at-2_NA_illumina      | Axin                                      | 3943.8335 |
| 8956 | RC_AA465222_at_NA_illumina     | EST: aa24f05.s1 NCI_CGAP_GCB1 Homo        | 3944.0576 |
| 8957 | AA247643_at_NA_illumina        | EST: csg4860.seq.F Human fetal heart,     | 3944.6958 |
| 8958 | AA465553_at_NA_illumina        | Aa33g05.r1 NCI_CGAP_GCB1 Homo             | 3945.067  |
| 8959 | U50929_at_GI_4502406-S         | Betaine:homocysteine methyltransferase    | 3945.119  |
| 8960 | HG4264-HT4534_s_at_NA_illumina | Guanine Nucleotide-Binding Protein Rab5c- | 3945.1992 |
| 8961 | AA443251_at_NA_illumina        | EST: aa14c12.r1 Soares NhHMPu S1          | 3945.8318 |
| 8962 | L13391_at_GI_4506516-S         | REGULATOR OF G-PROTEIN                    | 3946.0308 |
| 8963 | AA465601_at_NA_illumina        | EST: aa24h10.r1 NCI_CGAP_GCB1             | 3946.3792 |
| 8964 | K02215_at_GI_4557286-S         | ANGIOTENSINOGEN PRECURSOR                 | 3946.3992 |
| 8965 | AA037199_at_GI_5453556-S       | Homo sapiens TRIAD1 type I mRNA,          | 3946.7297 |
| 8966 | RC_AA447642_at_GI_21071005-S   | EST: zw97e07.s1 Soares total fetus        | 3946.9578 |
| 8967 | D78947_at_GI_34222219-S        | EST: Human placenta cDNA 5'-end GEN-      | 3947.4478 |
| 8968 | X00588_at_GI_41327733-I        | EGFR Epidermal growth factor receptor     | 3947.5088 |
| 8969 | RC_AA180208_at_NA_illumina     | EST: zp35f01.s1 Stratagene muscle         | 3947.7668 |
| 8970 | U78027_rna4_at_GI_4557376-S    | L44L gene (L44-like ribosomal protein)    | 3948.2412 |
| 8971 | U90909_at_GI_34147697-S        | Clone 23722 mRNA sequence                 | 3948.447  |
| 8972 | RC_AA454651_at_NA_illumina     | EST: zx99f01.s1 Soares NhHMPu S1          | 3948.9153 |
| 8973 | N40816_at_NA_illumina          | Splicing factor, arginine/serine-rich 9   | 3948.9495 |
| 8974 | R22303_at_NA_illumina          | EST: yh26b09.r1 Homo sapiens cDNA         | 3949.7495 |
| 8975 | X93996_rna1_at-2_NA_illumina   | H.sapiens mRNA for AFX protein            | 3949.953  |

|      |                              |                                         |           |
|------|------------------------------|-----------------------------------------|-----------|
| 8976 | X93996_rna1_at_GI_5174578-S  | AFX protein                             | 3949.953  |
| 8977 | M38193_rna1_s_at_NA_illumina | Granzyme B (granzyme 2, cytotoxic T-    | 3950.319  |
| 8978 | RC_AA454113_s_at_NA_illumina | Human N-benzoyl-L-tyrosyl-p-amino-      | 3950.6492 |
| 8979 | X72889_at_NA_illumina        | Transcriptional activator hSNF2a        | 3951.0867 |
| 8980 | D82294_at_GI_37588849-A      | EST: similar to none, mRNA sequence.    | 3951.34   |
| 8981 | Y00067_rna1_at_GI_4885512-S  | Neurofilament subunit M (NF-M)          | 3951.4724 |
| 8982 | R78119_at_GI_29740221-S      | EST: yi80c10.r1 Homo sapiens cDNA       | 3952.461  |
| 8983 | RC_AA173981_at_GI_11321633-S | EST: zp03e05.s1 Stratagene ovarian      | 3952.5898 |
| 8984 | AA190226_at_GI_11024697-S    | Homo sapiens mRNA for KIAA0679          | 3953.1482 |
| 8985 | U20908_at_GI_31652258-S      | Clone 350/2 melanoma ubiquitous mutated | 3954.1052 |
| 8986 | R35733_at_NA_illumina        | Yg67h02.r1 Homo sapiens cDNA clone      | 3954.133  |
| 8987 | X66945_at_GI_13186246-A      | FGFR1 Basic fibroblast growth factor    | 3955.4302 |
| 8988 | AA404214_at_NA_illumina      | EST: zt43f06.r1 Soares ovary tumor      | 3955.574  |
| 8989 | X77548_at_GI_14149616-S      | CDNA for RFG                            | 3955.7449 |
| 8990 | RC_AA428139_s_at_NA_illumina | EST: zw50h06.s1 Soares total fetus      | 3956.128  |
| 8991 | AA495857_at_GI_37537685-S    | EST: zw05b08.r1 Soares NhHMPu S1        | 3956.9424 |
| 8992 | RC_AA447686_at_GI_40018637-S | EST: aa18c12.s1 Soares NhHMPu S1        | 3957.1328 |
| 8993 | AA152069_at_NA_illumina      | H.sapiens mRNA for galectin-8           | 3957.3425 |
| 8994 | RC_AA496557_at_NA_illumina   | EST: zv38e05.s1 Soares ovary tumor      | 3958.676  |
| 8995 | RC_AA142980_at_NA_illumina   | EST: zl49e02.s1 Soares pregnant uterus  | 3958.8083 |
| 8996 | U90551_at_GI_21396481-S      | Histone 2A-like protein (H2A/I) mRNA    | 3958.94   |
| 8997 | AB002292_at_GI_7662041-S     | KIAA0294 gene product                   | 3959.6118 |
| 8998 | AA028976_at_GI_33188434-A    | EST: zk11a03.r1 Soares pregnant uterus  | 3959.8796 |
| 8999 | W67456_at_NA_illumina        | EST: zd43e09.r1 Soares fetal heart      | 3961.2283 |
| 9000 | U25988_at_GI_42714663-I      | PSG13 Pregnancy-specific beta-1         | 3961.9858 |
| 9001 | U69546_at_GI_5729815-S       | RNA binding protein Etr-3 mRNA          | 3962.1562 |
| 9002 | RC_AA448169_at_GI_40254948-S | EST: zw83b02.s1 Soares testis NHT       | 3963.7058 |
| 9003 | RC_AA127238_at_NA_illumina   | EST: zl17g05.s1 Soares pregnant uterus  | 3963.8416 |
| 9004 | X90579_s_at_GI_15147331-S    | H.sapiens DNA for cyp related           | 3964.798  |
| 9005 | AA329211_s_at_NA_illumina    | EST: EST33065 Embryo, 12 week II Homo   | 3964.9592 |
| 9006 | Y10376_at_GI_5174678-S       | SIRP-beta1                              | 3966.2688 |
| 9007 | U90916_at_NA_illumina        | Clone 23815 mRNA sequence               | 3966.3513 |
| 9008 | RC_AA405543_at_GI_8922201-A  | EST: zw39c01.s1 Soares total fetus      | 3967.5093 |
| 9009 | L42601_f_at_NA_illumina      | KERATIN, TYPE II CYTOSKELETAL 6D        | 3967.8032 |
| 9010 | RC_AA350030_at_NA_illumina   | EST: EST57075 Infant brain Homo         | 3967.9285 |
| 9011 | RC_AA411167_at_NA_illumina   | EST: zt33a01.s1 Soares ovary tumor      | 3968.1033 |
| 9012 | RC_AA406338_at_NA_illumina   | EST: zv10f06.s1 Soares NhHMPu S1        | 3968.1882 |
| 9013 | RC_AA488872_s_at_NA_illumina | EST: aa55e03.s1 NCI_CGAP_GCB1           | 3968.4949 |
| 9014 | RC_AA425773_at_NA_illumina   | EST: zw47g09.s1 Soares total fetus      | 3969.4106 |
| 9015 | X00734_at_GI_5174736-S       | TUBB Beta-tubulin                       | 3969.6025 |
| 9016 | N71210_s_at_GI_23199984-S    | KIAA0623 gene product                   | 3969.6072 |
| 9017 | U27185_at_GI_4506424-S       | RAR-responsive (TIG1) mRNA              | 3970.0437 |
| 9018 | L10374_at_NA_illumina        | (clone CTG-A4) mRNA sequence            | 3970.3704 |

|      |                                |                                           |           |
|------|--------------------------------|-------------------------------------------|-----------|
| 9019 | L10374_at-2_NA_illumina        | Human (clone CTG-A4) mRNA sequence        | 3970.3704 |
| 9020 | RC_AA400074_at_GI_44889959-S   | EST: zu62d05.s1 Soares testis NHT Homo    | 3970.603  |
| 9021 | W26958_at_NA_illumina          | EST: 16g8 Human retina cDNA randomly      | 3970.7104 |
| 9022 | RC_AA135185_at_NA_illumina     | EST: zo27a05.s1 Stratagene colon          | 3970.7517 |
| 9023 | N77562_at_GI_30089915-S        | EST: yz89g10.r1 Homo sapiens cDNA         | 3970.8086 |
| 9024 | W27451_at_GI_37544667-S        | EST: 31b3 Human retina cDNA randomly      | 3971.1929 |
| 9025 | N44998_at_NA_illumina          | Fatty-acid-Coenzyme A ligase, long-chain  | 3971.71   |
| 9026 | AA203738_at_GI_45333908-I      | EST: zx53b06.r1 Soares fetal liver spleen | 3972.4714 |
| 9027 | HG3934-HT4204_at_NA_illumina   | G1 Phase-Specific Gene                    | 3973.3535 |
| 9028 | RC_AA194257_r_at_NA_illumina   | Human DNA sequence from clone 522J7       | 3973.4172 |
| 9029 | RC_AA401745_at_NA_illumina     | EST: zt66e05.s1 Soares testis NHT Homo    | 3973.4434 |
| 9030 | C16652_at_NA_illumina          | KIAA0575 gene product                     | 3973.6824 |
| 9031 | L42243_cds1_at-2_NA_illumina   | Interferon (alpha, beta and omega)        | 3973.8533 |
| 9032 | L42243_cds1_at_GI_19923128-S   | IFNAR2 gene (interferon receptor)         | 3973.8533 |
| 9033 | RC_AA452584_at_NA_illumina     | EST: zx39e08.s1 Soares total fetus        | 3974.7937 |
| 9034 | H91747_s_at_NA_illumina        | EST: ys80e03.r1 Homo sapiens cDNA         | 3976.408  |
| 9035 | HG3987-HT4257_at_NA_illumina   | Cpg-Enriched Dna, Clone E06               | 3976.645  |
| 9036 | RC_AA428240_at_GI_7657505-S    | EST: zw51d04.s1 Soares total fetus        | 3976.897  |
| 9037 | S77893_s_at_NA_illumina        | GPSAT=glycophorin SAT [human,             | 3977.2466 |
| 9038 | M12174_at_NA_illumina          | ARH6 Aplysia ras-related homolog 6        | 3977.25   |
| 9039 | RC_AA135824_at_GI_8922922-S    | EST: zl24f10.s1 Soares pregnant uterus    | 3977.265  |
| 9040 | AA356049_at_NA_illumina        | A disintegrin and metalloprotease domain  | 3978.214  |
| 9041 | L12468_at_GI_36951115-S        | ENPEP Glutamyl aminopeptidase             | 3978.617  |
| 9042 | H06583_at_NA_illumina          | CAMP responsive element binding protein-  | 3978.7    |
| 9043 | RC_AA479044_s_at_GI_21040361-  | EST: zu36d09.s1 Soares ovary tumor        | 3978.9692 |
| 9044 | RC_AA054152_at_GI_29788771-S   | EST: zf54g07.s1 Soares retina N2b4HR      | 3979.0786 |
| 9045 | X06614_at_GI_4506418-S         | Receptor of retinoic acid                 | 3979.6296 |
| 9046 | AA279359_at_GI_6715587-S       | EST: zs84d01.r1 NCI_CGAP_GCB1 Homo        | 3979.6597 |
| 9047 | N30998_at_NA_illumina          | EST: yx51a06.r1 Homo sapiens cDNA         | 3980.219  |
| 9048 | J04469_at_NA_illumina          | Mitochondrial creatine kinase (CKMT)      | 3981.813  |
| 9049 | U51678_at_GI_31982890-S        | Small acidic protein mRNA                 | 3982.3416 |
| 9050 | RC_AA171488_at_NA_illumina     | Homo sapiens clone 24778 unknown          | 3983.4766 |
| 9051 | RC_AA278391_at_NA_illumina     | EST: zt08c05.s1 NCI_CGAP_GCB1 Homo        | 3984.3545 |
| 9052 | D38548_at_NA_illumina          | KIAA0076 gene                             | 3984.4868 |
| 9053 | RC_AA600302_at_NA_illumina     | EST: ag04a07.s1 Gessler Wilms tumor       | 3984.5508 |
| 9054 | RC_AA157506_at_NA_illumina     | EST: zo55d01.s1 Stratagene pancreas       | 3984.6665 |
| 9055 | RC_AA351031_i_at_GI_24497477-A | Renal organic anion transporter 1         | 3985.3772 |
| 9056 | AFFX-                          | AFFX-HSAC07/X00351_5_st (endogenous       | 3985.9785 |
| 9057 | AFFX-HSAC07/X00351_5_st-       | No info for gene                          | 3985.9785 |
| 9058 | RC_AA599872_at_GI_30410778-A   | Homo sapiens Huntingtin interacting       | 3986.2207 |
| 9059 | U43747_s_at_NA_illumina        | FRDA Friedreich ataxia                    | 3986.5957 |
| 9060 | U43747_s_at-2_NA_illumina      | Friedreich ataxia                         | 3986.5957 |
| 9061 | AA112532_at_NA_illumina        | EST: zm28f06.r1 Stratagene pancreas       | 3987.091  |

|      |                               |                                           |           |
|------|-------------------------------|-------------------------------------------|-----------|
| 9062 | U72066_at_GI_42718012-A       | CtBP interacting protein CtIP (CtIP) mRNA | 3987.1572 |
| 9063 | RC_AA401633_at_NA_illumina    | EST: zv65b11.s1 Soares total fetus        | 3987.8875 |
| 9064 | R78991_at_GI_24234685-A       | Lactate dehydrogenase B                   | 3988.0098 |
| 9065 | AA252940_s_at_GI_9966762-S    | Homo sapiens mRNA for putative RING       | 3989.2935 |
| 9066 | RC_AA476720_at_NA_illumina    | EST: zw92g06.s1 Soares total fetus        | 3989.8174 |
| 9067 | RC_AA459005_at_GI_32171183-A  | EST: aa25c05.s1 NCI_CGAP_GCB1             | 3989.883  |
| 9068 | M64347_at_GI_13112047-A       | FGFR3 Fibroblast growth factor receptor 3 | 3990.8687 |
| 9069 | U31384_at_GI_20127455-S       | G protein gamma-11 subunit mRNA           | 3991.658  |
| 9070 | RC_AA044418_at_NA_illumina    | EST: zk52g04.s1 Soares pregnant uterus    | 3993.4792 |
| 9071 | M88458_at_GI_8051609-S        | ELP-1 mRNA sequence                       | 3994.1748 |
| 9072 | M16965_s_at_NA_illumina       | Cerebellar degeneration-related protein   | 3996.4697 |
| 9073 | AA151569_s_at_GI_22748776-S   | EST: zl39h08.r1 Soares pregnant uterus    | 3996.491  |
| 9074 | U12139_at_NA_illumina         | Alpha1(XI) collagen (COL11A1) gene, 5'    | 3996.8064 |
| 9075 | M29927_at_GI_4557808-S        | OAT Ornithine aminotransferase (gyrate    | 3997.3936 |
| 9076 | RC_AA278850_at_GI_11968040-S  | EST: zs77g06.s1 NCI_CGAP_GCB1             | 3998.607  |
| 9077 | C14290_s_at_GI_45433544-S     | EST: Human fetal brain cDNA 5'-end GEN-   | 3999.33   |
| 9078 | M60721_at_GI_19923769-S       | Homeobox gene                             | 4000.2134 |
| 9079 | AA465434_at_NA_illumina       | Karyopherin (importin) beta 2             | 4000.8862 |
| 9080 | D50928_at_GI_7661935-S        | KIAA0138 gene                             | 4002.3848 |
| 9081 | D50928_at-2_NA_illumina       | KIAA0138 gene product                     | 4002.3848 |
| 9082 | AA450150_at_GI_19923532-S     | Homo sapiens clones 24718 and 24825       | 4002.6248 |
| 9083 | RC_AA234089_at_NA_illumina    | Serine/threonine kinase 17a (apoptosis-   | 4002.9958 |
| 9084 | R23293_at_GI_42544178-S       | FK506-binding protein 2 (13kD)            | 4003.356  |
| 9085 | W93451_at_NA_illumina         | Homo sapiens mRNA for KIAA0795            | 4003.5364 |
| 9086 | RC_AA256996_at_GI_18375674-A  | EST: zr81h11.s1 Soares NhHMPu S1          | 4003.7214 |
| 9087 | RC_AA149814_at_NA_illumina    | EST: zl47h09.s1 Soares pregnant uterus    | 4004.0186 |
| 9088 | AA421079_at_GI_21359925-S     | EST: zu08f11.r1 Soares testis NHT Homo    | 4004.5312 |
| 9089 | AA442669_at_NA_illumina       | Zv68f06.r1 Soares total fetus Nb2HF8 9w   | 4005.881  |
| 9090 | J05633_at_GI_34147573-S       | ITGB5 Integrin beta-5 subunit             | 4007.2502 |
| 9091 | X75304_at_GI_4758453-S        | Golgi antigen gcp372                      | 4007.2852 |
| 9092 | Z49989_at_GI_19913393-A       | Smoothelin                                | 4008.155  |
| 9093 | RC_AA156873_at_NA_illumina    | EST: zl20h08.s1 Soares pregnant uterus    | 4008.1697 |
| 9094 | RC_AA114190_at_GI_45331214-S  | EST: zn76d01.s1 Stratagene NT2            | 4008.3428 |
| 9095 | RC_AA458909_at_GI_23943857-S  | EST: aa26e06.s1 NCI_CGAP_GCB1             | 4008.8088 |
| 9096 | M25897_at_GI_4505732-S        | PF4 Platelet factor 4                     | 4009.6763 |
| 9097 | RC_AA399418_at_GI_29029588-A  | EST: zt50f08.s1 Soares ovary tumor        | 4010.8157 |
| 9098 | RC_AA291012_s_at_GI_37538413- | EST: zs45g11.s1 NCI_CGAP_GCB1             | 4011.488  |
| 9099 | U40282_at_GI_4758605-S        | Integrin-linked kinase (ILK) mRNA         | 4012.162  |
| 9100 | R09286_at_NA_illumina         | Homo sapiens LIM protein mRNA,            | 4012.4897 |
| 9101 | RC_AA403296_at_GI_13386483-S  | EST: zt44c06.s1 Soares ovary tumor        | 4012.7341 |
| 9102 | RC_AA134532_at_NA_illumina    | EST: zl21a12.s1 Soares pregnant uterus    | 4013.371  |
| 9103 | RC_AA423820_at_GI_13128997-S  | EST: zv33f03.s1 Soares ovary tumor        | 4013.875  |
| 9104 | AA291374_s_at_NA_illumina     | EST: zt44d04.r1 Soares ovary tumor        | 4013.8813 |

|      |                              |                                                                     |           |
|------|------------------------------|---------------------------------------------------------------------|-----------|
| 9105 | RC_AA129919_at_NA_illumina   | EST: zl14c12.s1 Soares pregnant uterus                              | 4013.9514 |
| 9106 | AA402142_at_GI_37059752-S    | EST: zt67d09.r1 Soares testis NHT Homo                              | 4014.3787 |
| 9107 | RC_AA442142_at_GI_27479422-S | EST: zw56h02.s1 Soares total fetus                                  | 4014.523  |
| 9108 | AA000993_at_GI_9910507-S     | EST: ze46h10.r1 Soares retina N2b4HR                                | 4015.6067 |
| 9109 | RC_AA449756_at_NA_illumina   | EST: zx07f09.s1 Soares total fetus                                  | 4016.1907 |
| 9110 | L10338_s_at_GI_39930609-I    | SCN1B Sodium channel, voltage-gated,                                | 4016.3489 |
| 9111 | RC_AA399623_at_NA_illumina   | EST: zt93b07.s1 Soares testis NHT Homo                              | 4017.0261 |
| 9112 | M29194_at_GI_4557722-S       | LIPC Lipase, hepatic                                                | 4017.2324 |
| 9113 | RC_AA059214_at_NA_illumina   | EST: zf64g11.s1 Soares retina N2b4HR                                | 4017.4028 |
| 9114 | U72342_at_GI_6031206-S       | PLATELET-ACTIVATING FACTOR                                          | 4017.757  |
| 9115 | X92518_s_at_NA_illumina      | HMGI-C                                                              | 4018.4988 |
| 9116 | RC_AA610070_at_GI_4502566-S  | EST: af08e11.s1 Soares testis NHT Homo                              | 4018.58   |
| 9117 | AF006041_at_GI_31542491-S    | Fas-binding protein (DAXX) mRNA, partial                            | 4018.9001 |
| 9118 | M23263_at-2_NA_illumina      | Androgen receptor (dihydrotestosterone                              | 4019.3076 |
| 9119 | M23263_at_GI_21322251-S      | AR Androgen receptor                                                | 4019.3076 |
| 9120 | C00125_s_at_NA_illumina      | EST: HUMGS0005758, Human Gene                                       | 4019.3586 |
| 9121 | L08096_s_at-2_NA_illumina    | Tumor necrosis factor (ligand) superfamily,                         | 4020.5159 |
| 9122 | L08096_s_at_GI_24119161-S    | CD70 CD70 antigen (CD27 ligand)                                     | 4020.5159 |
| 9123 | U19261_at_GI_22027610-S      | Epstein-Barr virus-induced protein mRNA                             | 4020.5251 |
| 9124 | RC_AA158132_at_GI_37594463-S | EST: zo43h09.s1 Stratagene endothelial                              | 4020.6287 |
| 9125 | N95742_at_GI_21071076-S      | Homo sapiens mRNA for KIAA0666                                      | 4022.473  |
| 9126 | H18718_at_GI_39812377-S      | Novel centrosomal protein RanBPM                                    | 4023.8186 |
| 9127 | AA203340_at_GI_37540630-S    | Ribosomal protein S20                                               | 4024.9524 |
| 9128 | C01877_at_GI_23397652-S      | EST: HUMGS0003856, Human Gene                                       | 4025.805  |
| 9129 | U61836_at_GI_28559077-A      | Putative cyclin G1 interacting protein                              | 4026.616  |
| 9130 | U61836_at-2_NA_illumina      | Human putative cyclin G1 interacting                                | 4026.616  |
| 9131 | AA091284_at_GI_25014098-S    | EST: cchn2417.seq.F Fetal heart, Lambda                             | 4027.2996 |
| 9132 | U60805_at-2_NA_illumina      | Oncostatin M receptor                                               | 4028.002  |
| 9133 | U60805_at_GI_4557039-S       | Oncostatin-M specific receptor beta                                 | 4028.002  |
| 9134 | R02207_s_at_GI_34147722-S    | EST: ye83b06.r1 Homo sapiens cDNA                                   | 4028.574  |
| 9135 | U52112_ma5_at_GI_11496987-S  | RbP gene (renin-binding protein) extracted                          | 4028.8066 |
| 9136 | HG2059-HT2114_at_NA_illumina | Arrestin, Beta 2                                                    | 4029.0654 |
| 9137 | T95430_at_GI_39725646-S      | Homo sapiens mRNA for putative                                      | 4029.2136 |
| 9138 | AA421213_at_GI_7657314-S     | EST: zu27a10.r1 Soares ovary tumor                                  | 4031.4822 |
| 9139 | Z56281_at_GI_4504724-S       | Interferon regulatory factor 3                                      | 4031.5977 |
| 9140 | AA090660_at_GI_19923408-S    | EST: y1211.seq.F Fetal heart, Lambda                                | 4032.4448 |
| 9141 | RC_AA134141_at_NA_illumina   | Homo sapiens RRM RNA binding protein                                | 4035.9053 |
| 9142 | D85181_at_GI_10800413-S      | Thymosin beta-4 mRNA                                                | 4036.7534 |
| 9143 | M37457_s_at_NA_illumina      | Na <sup>+</sup> ,K <sup>+</sup> -ATPase catalytic subunit alpha-III | 4037.2114 |
| 9144 | AA058376_at_NA_illumina      | Sjogren syndrome antigen A2 (60kD,                                  | 4037.3862 |
| 9145 | RC_AA478778_at_GI_33624884-A | EST: zv20b06.s1 Soares NhHMPu S1                                    | 4037.6628 |
| 9146 | U25182_at_GI_5453548-S       | Antioxidant enzyme AOE37-2 mRNA                                     | 4037.758  |
| 9147 | R50247_s_at_GI_7662660-S     | EST: yj58b01.r1 Homo sapiens cDNA                                   | 4037.9368 |

|      |                                |                                         |           |
|------|--------------------------------|-----------------------------------------|-----------|
| 9148 | U17077_at_NA_illumina          | BENE mRNA, partial cds                  | 4038.8494 |
| 9149 | M58286_s_at_GI_23312372-S      | TNFR1 Tumor necrosis factor receptor 1  | 4039.192  |
| 9150 | M59830_at_GI_26787974-S        | HEAT SHOCK 70 KD PROTEIN 1              | 4039.3062 |
| 9151 | X58072_at_NA_illumina          | GATA3 GATA-binding protein 3            | 4039.3662 |
| 9152 | RC_AA452261_at_GI_9945319-S    | EST: zx15h05.s1 Soares total fetus      | 4039.6448 |
| 9153 | W26395_at_NA_illumina          | EST: 29h10 Human retina cDNA randomly   | 4040.501  |
| 9154 | U83460_s_at_GI_40254457-S      | Solute carrier family 31 (copper        | 4040.5686 |
| 9155 | RC_AA258383_at_NA_illumina     | Ash2 (absent, small, or homeotic,       | 4040.9465 |
| 9156 | AA166776_at_GI_29789057-S      | Homo sapiens mRNA for KIAA0869          | 4041.1362 |
| 9157 | AA150990_at_GI_23111056-S      | EST: zl47h03.r1 Soares pregnant uterus  | 4041.4358 |
| 9158 | RC_AA404483_at_NA_illumina     | EST: zw38a02.s1 Soares total fetus      | 4041.5232 |
| 9159 | W01296_at_NA_illumina          | EST: yz94g12.r1 Soares melanocyte       | 4043.1433 |
| 9160 | N40320_at_NA_illumina          | EST: yx80g06.r1 Homo sapiens cDNA       | 4043.47   |
| 9161 | X95073_at_GI_20302159-S        | Translin associated protein X           | 4043.5857 |
| 9162 | X95073_at-2_NA_illumina        | H.sapiens mRNA for translin associated  | 4043.5857 |
| 9163 | RC_AA436239_at_GI_29789121-S   | Cryptochrome 2 (photolyase-like)        | 4044.118  |
| 9164 | D87437_at_GI_42476073-A        | KIAA0250 gene                           | 4044.2747 |
| 9165 | RC_AA411462_at_NA_illumina     | EST: zv30g03.s1 Soares ovary tumor      | 4044.2952 |
| 9166 | R51194_f_at_NA_illumina        | EST: yj71a08.r1 Homo sapiens cDNA       | 4044.4978 |
| 9167 | AA223386_at_GI_14150170-S      | EST: zr08e09.r1 Stratagene NT2 neuronal | 4045.705  |
| 9168 | AA166651_at_GI_14149628-S      | Homo sapiens mRNA for putative          | 4046.6091 |
| 9169 | RC_AA283074_at_GI_37559950-S   | Homo sapiens mRNA for KIAA0819          | 4046.8496 |
| 9170 | L25931_s_at_GI_37595751-A      | LBR Lamin B receptor                    | 4047.0928 |
| 9171 | R25326_at_NA_illumina          | Homo sapiens mRNA for putative vacuolar | 4048.1765 |
| 9172 | RC_AA451851_at_GI_40787998-S   | EST: zx12f10.s1 Soares total fetus      | 4051.2307 |
| 9173 | RC_AA149586_at_NA_illumina     | EST: zl39e03.s1 Soares pregnant uterus  | 4051.7214 |
| 9174 | RC_D20171_at_NA_illumina       | EST: Human HL60 3'directed Mbol cDNA,   | 4051.7227 |
| 9175 | M90656_at_GI_45359851-S        | GLCLC Glutamate-cysteine ligase (gamma- | 4051.7634 |
| 9176 | D82399_at_GI_32484989-S        | Homo sapiens clone 23714 mRNA           | 4052.863  |
| 9177 | RC_AA521103_at_NA_illumina     | EST: aa70g03.s1 NCI_CGAP_GCB1           | 4053.5034 |
| 9178 | T75086_at_GI_39725679-S        | Cytochrome c oxidase subunit IV         | 4053.51   |
| 9179 | RC_AA423987_at_NA_illumina     | EST: zv79g03.s1 Soares total fetus      | 4054.11   |
| 9180 | X69962_s_at-2_NA_illumina      | Fragile X mental retardation 1          | 4054.9558 |
| 9181 | X69962_s_at_NA_illumina        | FMR1 Fragile X mental retardation 1     | 4054.9558 |
| 9182 | RC_AA442098_f_at_GI_32698751-S | EST: zw63f08.s1 Soares total fetus      | 4055.1653 |
| 9183 | H20627_at_GI_19923839-S        | EST: ym47c05.r1 Homo sapiens cDNA       | 4055.7156 |
| 9184 | RC_AA425367_at_NA_illumina     | EST: zw46f07.s1 Soares total fetus      | 4055.9656 |
| 9185 | AA376875_at_NA_illumina        | Monoamine oxidase A                     | 4056.0156 |
| 9186 | RC_AA115760_at_NA_illumina     | EST: zk96g07.s1 Soares pregnant uterus  | 4056.6592 |
| 9187 | U90426_at_GI_21040370-A        | Nuclear RNA helicase                    | 4057.379  |
| 9188 | RC_AA252209_at_NA_illumina     | EST: zr63g05.s1 Soares NhHMPu S1        | 4058.1194 |
| 9189 | RC_AA435591_at_NA_illumina     | EST: zt85e07.s1 Soares testis NHT Homo  | 4058.1646 |
| 9190 | RC_AA450281_at_NA_illumina     | EST: zx42h07.s1 Soares total fetus      | 4058.2507 |

|      |                               |                                           |           |
|------|-------------------------------|-------------------------------------------|-----------|
| 9191 | RC_AA070841_at_NA_illumina    | Homo sapiens mRNA, complete cds,          | 4058.643  |
| 9192 | U14417_at_GI_24307908-S       | Ral guanine nucleotide dissociation       | 4059.291  |
| 9193 | RC_AA424147_at_NA_illumina    | EST: zv81c02.s1 Soares total fetus        | 4060.1038 |
| 9194 | X85373_at_GI_21359839-S       | Sm protein G                              | 4060.2903 |
| 9195 | U22970_ma1_s_at_GI_13259551-A | 6-16 gene (interferon-inducible peptide   | 4061.37   |
| 9196 | RC_AA287735_at_GI_37546515-S  | Human DNA sequence from clone             | 4062.4177 |
| 9197 | AA247434_at_GI_7657043-S      | EST: csg3167.seq.F Human fetal heart,     | 4064.1753 |
| 9198 | N27705_at_GI_16118226-S       | EST: yx52c12.r1 Homo sapiens cDNA         | 4064.2576 |
| 9199 | AA095038_s_at_GI_45238850-I   | Human placenta (Diff33) mRNA, complete    | 4064.702  |
| 9200 | RC_AA431448_at_NA_illumina    | EST: zw70e05.s1 Soares testis NHT         | 4065.3037 |
| 9201 | RC_D60774_f_at_NA_illumina    | EST: Human fetal brain cDNA 3'-end GEN-   | 4066.108  |
| 9202 | M15856_at_GI_4557726-S        | LPL Lipoprotein lipase                    | 4066.2515 |
| 9203 | AA018804_at_GI_19923482-S     | Homo sapiens clone 23675 mRNA             | 4067.0571 |
| 9204 | RC_AA460444_at_GI_7706269-S   | EST: zx66h10.s1 Soares total fetus        | 4067.4788 |
| 9205 | M81695_s_at_GI_34452172-S     | ITGAX Integrin, alpha X (antigen CD11C    | 4067.5288 |
| 9206 | RC_AA459389_at_GI_31543820-S  | Tyrosylprotein sulfotransferase 2         | 4067.796  |
| 9207 | L13698_at_GI_4503918-S        | GAS1 Growth arrest-specific 1             | 4068.109  |
| 9208 | RC_AA430368_at_GI_17318566-A  | Cyclin E2                                 | 4068.266  |
| 9209 | X57830_at-2_NA_illumina       | 5-hydroxytryptamine (serotonin) receptor  | 4068.9644 |
| 9210 | X57830_at_NA_illumina         | Serotonin 5-HT2 receptor mRNA             | 4068.9644 |
| 9211 | U48250_at_GI_17978474-S       | Protein kinase C-binding protein RACK17   | 4068.9814 |
| 9212 | W01715_at_GI_42476173-S       | EST: za37e07.r1 Soares fetal liver spleen | 4069.1565 |
| 9213 | D21235_at_NA_illumina         | HHR23A protein                            | 4070.3152 |
| 9214 | RC_AA455988_at_GI_4502368-S   | Butyrobetaine (gamma), 2-oxoglutarate     | 4070.6367 |
| 9215 | U43923_at_GI_4507310-S        | Transcription factor SUPT4H mRNA          | 4071.3818 |
| 9216 | RC_AA011176_at_NA_illumina    | EST: ze22b07.s1 Soares fetal heart        | 4071.4912 |
| 9217 | RC_AA278843_at_NA_illumina    | EST: zs80h04.s1 NCI_CGAP_GCB1             | 4071.8582 |
| 9218 | AA044095_at_GI_31542247-S     | EST: zk51a08.r1 Soares pregnant uterus    | 4072.1074 |
| 9219 | AA486511_at_NA_illumina       | EST: ab38g04.r1 Stratagene HeLa cell s3   | 4073.212  |
| 9220 | RC_AA252243_at_NA_illumina    | EST: zr64g05.s1 Soares NhHMPu S1          | 4073.429  |
| 9221 | H75589_s_at_NA_illumina       | EST: yu05e07.r1 Homo sapiens cDNA         | 4073.9817 |
| 9222 | RC_AA292328_at_GI_12597624-S  | EST: zt51f09.s1 Soares ovary tumor        | 4074.0464 |
| 9223 | W30943_at_NA_illumina         | EST: zc64f10.r1 Soares fetal heart        | 4074.1292 |
| 9224 | RC_AA431493_at_NA_illumina    | Ribosomal protein S27 (metalloprotein     | 4074.4382 |
| 9225 | RC_AA258184_at_GI_32455270-S  | EST: zs35f11.s1 NCI_CGAP_GCB1 Homo        | 4074.6836 |
| 9226 | U17760_ma1_at_GI_4557712-S    | Laminin S B3 chain (LAMB3) gene           | 4074.892  |
| 9227 | U94831_at_GI_37059746-S       | Multispanning membrane protein mRNA       | 4074.9766 |
| 9228 | U94831_at-2_NA_illumina       | Homo sapiens multispanning membrane       | 4074.9766 |
| 9229 | RC_AA477826_at_GI_22035684-S  | EST: zu39g07.s1 Soares ovary tumor        | 4075.7385 |
| 9230 | C01360_at_GI_21361903-S       | Homo sapiens clone 23904 mRNA             | 4076.3328 |
| 9231 | RC_AA411944_at_GI_4758021-S   | Coagulation factor C (Limulus             | 4077.6924 |
| 9232 | M58378_cds1_at_GI_19924096-A  | SYN1 gene (synapsin I) extracted from     | 4077.8875 |
| 9233 | M23161_at-2_NA_illumina       | Human transposon-like element mRNA        | 4077.8894 |

|      |                               |                                            |           |
|------|-------------------------------|--------------------------------------------|-----------|
| 9234 | M23161_at_GI_30466265-S       | Transposon-like element mRNA               | 4077.8894 |
| 9235 | RC_AA321833_at_GI_31543054-S  | EST: EST24395 Cerebellum II Homo           | 4078.84   |
| 9236 | RC_AA598429_at_GI_35038563-S  | EST: ae48d08.s1 Stratagene lung            | 4078.9333 |
| 9237 | AB002359_s_at_GI_31657128-S   | Human mRNA for KIAA0361 gene,              | 4079.217  |
| 9238 | AA116095_at_NA_illumina       | EST: zk91c11.r1 Soares pregnant uterus     | 4079.32   |
| 9239 | RC_AA340293_at_GI_33186926-A  | EST: EST45737 Fetal kidney III Homo        | 4079.7517 |
| 9240 | AA056171_at_NA_illumina       | EST: zk70c11.r1 Soares pregnant uterus     | 4081.0586 |
| 9241 | U08015_s_at_NA_illumina       | Human NF-ATc mRNA, complete cds            | 4081.0852 |
| 9242 | H12112_at_GI_7706644-S        | Ym16e10.r1 Homo sapiens cDNA clone         | 4082.2334 |
| 9243 | W46488_at_NA_illumina         | EST: zc32a07.r1 Soares senescent           | 4083.8406 |
| 9244 | RC_AA129311_at_NA_illumina    | EST: zn84d06.s1 Stratagene lung            | 4083.9202 |
| 9245 | RC_D60438_at_NA_illumina      | EST: Human fetal brain cDNA 3'-end GEN-    | 4086.3706 |
| 9246 | RC_D59958_at_NA_illumina      | EST: Human fetal brain cDNA 3'-end GEN-    | 4086.539  |
| 9247 | Z48804_at_GI_4557806-S        | mRNA (ocular albinism type 1 related)      | 4086.628  |
| 9248 | N81193_s_at_NA_illumina       | KIAA0628 gene product                      | 4086.7751 |
| 9249 | H58970_at_GI_34101287-S       | EST: yr40b03.r1 Homo sapiens cDNA          | 4087.1301 |
| 9250 | AA479835_s_at_NA_illumina     | EST: zu43g02.r1 Soares ovary tumor         | 4088.1345 |
| 9251 | RC_D60479_at_NA_illumina      | EST: Human fetal brain cDNA 3'-end GEN-    | 4088.5513 |
| 9252 | RC_AA194309_s_at_GI_40804753- | Reticulon 2                                | 4088.9375 |
| 9253 | U77735_at_GI_5803124-S        | Pim-2 protooncogene homolog pim-2h         | 4089.3408 |
| 9254 | L40636_at_GI_21396502-S       | (clone FBK III 16) protein tyrosine kinase | 4090.8176 |
| 9255 | L40636_at-2_NA_illumina       | EphB1                                      | 4090.8176 |
| 9256 | D58604_s_at_GI_37540458-S     | Homo sapiens mRNA for KIAA0573             | 4091.1484 |
| 9257 | RC_AA426259_at_NA_illumina    | EST: zw17a07.s1 Soares ovary tumor         | 4091.9421 |
| 9258 | N40349_at_GI_21166377-S       | EST: yy01c05.r1 Homo sapiens cDNA          | 4092.4055 |
| 9259 | RC_AA142849_at_GI_31341888-S  | EST: zl40h02.s1 Soares pregnant uterus     | 4092.5454 |
| 9260 | RC_AA132409_at_NA_illumina    | EST: zo28g12.s1 Stratagene colon           | 4092.9539 |
| 9261 | D82346_at_GI_26051267-A       | HNSPC                                      | 4094.3486 |
| 9262 | RC_AA521144_at_GI_18087836-S  | EST: aa73b05.s1 NCI_CGAP_GCB1              | 4094.5256 |
| 9263 | S62539_s_at_NA_illumina       | Insulin receptor substrate 1               | 4094.924  |
| 9264 | S76992_at_GI_40549447-S       | VAV2 Vav 2 oncogene                        | 4094.9312 |
| 9265 | S76992_at-2_NA_illumina       | Vav 2 oncogene                             | 4094.9312 |
| 9266 | AA046908_at_NA_illumina       | EST: zf47f09.r1 Soares retina N2b4HR       | 4095.211  |
| 9267 | X64559_at_NA_illumina         | TNA Tetranectin (plasminogen-binding       | 4095.41   |
| 9268 | RC_AA179602_at_NA_illumina    | EST: zp49f10.s1 Stratagene HeLa cell s3    | 4095.613  |
| 9269 | RC_AA621105_at_GI_6005759-S   | Homo sapiens lung cancer candidate         | 4095.8193 |
| 9270 | D30037_at-2_NA_illumina       | PHOSPHATIDYLINOSITOL                       | 4096.858  |
| 9271 | D30037_at_GI_19923401-S       | PHOSPHATIDYLINOSITOL                       | 4096.858  |
| 9272 | U78305_at_GI_29558519-S       | Protein phosphatase 1D magnesium-          | 4096.9766 |
| 9273 | AA127605_at_NA_illumina       | Homo sapiens mRNA for KIAA0829             | 4100.158  |
| 9274 | M96739_at_GI_19923328-S       | NSCL-1 mRNA sequence                       | 4101.0586 |
| 9275 | RC_AA252111_at_NA_illumina    | EST: zs12a08.s1 NCI_CGAP_GCB1              | 4101.4214 |
| 9276 | RC_AA037425_at_GI_13376326-S  | EST: zk36c05.s1 Soares pregnant uterus     | 4101.7075 |



|      |                                |                                            |           |
|------|--------------------------------|--------------------------------------------|-----------|
| 9277 | D58115_s_at_NA_illumina        | EST: Human aorta cDNA 5'-end GEN-          | 4102.4463 |
| 9278 | H04854_at_NA_illumina          | Interleukin 1 receptor accessory protein   | 4102.4854 |
| 9279 | J03600_at_GI_4502056-S         | ALOX5 Arachidonate 5-lipoxygenase          | 4103.387  |
| 9280 | M94362_at_GI_27436950-S        | LAMB2 Laminin, beta 2 (laminin S)          | 4103.668  |
| 9281 | RC_AA286873_at_NA_illumina     | EST: zs55g07.s1 NCI_CGAP_GCB1              | 4106.4233 |
| 9282 | RC_AA399414_at_GI_22749452-S   | EST: zt50e07.s1 Soares ovary tumor         | 4107.1904 |
| 9283 | AA287973_at_NA_illumina        | Homo sapiens clone 24582 mRNA              | 4107.225  |
| 9284 | RC_AA443660_at_NA_illumina     | EST: zw86a12.s1 Soares total fetus         | 4108.524  |
| 9285 | AA234665_at_GI_11496980-A      | Supervillin                                | 4108.634  |
| 9286 | X54870_at_GI_6679051-S         | NKG2-D TYPE II INTEGRAL MEMBRANE           | 4108.7354 |
| 9287 | RC_AA424952_s_at_NA_illumina   | EST: zw03g12.s1 Soares NhHMPu S1           | 4109.5947 |
| 9288 | RC_AA258220_s_at_NA_illumina   | Human zinc finger protein RIZ mRNA,        | 4109.792  |
| 9289 | RC_AA074157_at_NA_illumina     | EST: zm76b01.s1 Stratagene                 | 4110.293  |
| 9290 | AA007583_at_GI_39725691-S      | Homo sapiens DNA sequence from             | 4110.458  |
| 9291 | M86737_at_GI_28416943-S        | SSRP1 High mobility group box              | 4110.5903 |
| 9292 | AF009801_at_GI_25121985-S      | Bagpipe homeobox (Drosophila) homolog      | 4110.8726 |
| 9293 | H19378_at_NA_illumina          | EST: ym46e01.r1 Homo sapiens cDNA          | 4111.3706 |
| 9294 | D13666_s_at_GI_5453833-S       | Osteoblast specific factor 2 (OSF-2os)     | 4112.1396 |
| 9295 | RC_AA029046_s_at_GI_21361599-S | EST: zk09g09.s1 Soares pregnant uterus     | 4112.291  |
| 9296 | RC_AA055892_at_NA_illumina     | EST: zf20d06.s1 Soares fetal heart         | 4112.8745 |
| 9297 | U89336_cds4_at_GI_34305290-S   | Unknown gene extracted from Human HLA      | 4112.951  |
| 9298 | L35545_at_GI_34335271-S        | Endothelial cell protein C/APC receptor    | 4112.983  |
| 9299 | AA249175_at_GI_34452682-S      | EST: hfe0150.seq.F Human fetal heart,      | 4113.0596 |
| 9300 | RC_AA424398_at_GI_22095396-S   | EST: zv82e01.s1 Soares total fetus         | 4113.3374 |
| 9301 | RC_AA496347_at_NA_illumina     | EST: zv31e09.s1 Soares ovary tumor         | 4113.8604 |
| 9302 | X53586_rna1_at_GI_4557674-S    | Integrin alpha 6 (or alpha E) protein gene | 4113.953  |
| 9303 | AA442274_at_NA_illumina        | EST: zv54a06.r1 Soares testis NHT Homo     | 4115.0493 |
| 9304 | RC_AA194257_f_at_NA_illumina   | Human DNA sequence from clone 522J7        | 4115.421  |
| 9305 | W40477_at_NA_illumina          | Peroxisomal biogenesis factor 14           | 4115.4736 |
| 9306 | RC_AA419200_at_GI_41281529-S   | KIAA0475 gene product                      | 4115.615  |
| 9307 | RC_AA609645_at_GI_15147249-S   | EST: af16a09.s1 Soares testis NHT Homo     | 4116.235  |
| 9308 | U26173_s_at_GI_4885516-S       | BZIP protein NF-IL3A (IL3BP1) mRNA         | 4116.8535 |
| 9309 | RC_AA598639_at_NA_illumina     | EST: ae36a11.s1 Gessler Wilms tumor        | 4117.3745 |
| 9310 | U38864_at_GI_24797064-S        | Zinc-finger protein C2H2-150 mRNA          | 4117.4824 |
| 9311 | U38864_at-2_NA_illumina        | Human zinc-finger protein C2H2-150         | 4117.4824 |
| 9312 | RC_AA191512_at_NA_illumina     | EST: zp81g01.s1 Stratagene HeLa cell s3    | 4117.5703 |
| 9313 | RC_AA171985_at_GI_37539723-S   | EST: zo98g05.s1 Stratagene ovarian         | 4117.796  |
| 9314 | L02785_at_GI_4557534-S         | DRA Down-regulated in adenoma              | 4117.994  |
| 9315 | AA452724_at_GI_21735599-S      | TFAR19 novel apoptosis-related gene        | 4118.1157 |
| 9316 | RC_AA262887_at_GI_22748652-S   | EST: zs26b12.s1 NCI_CGAP_GCB1              | 4120.2134 |
| 9317 | U09284_at_GI_13518025-S        | PINCH protein mRNA                         | 4120.6226 |
| 9318 | U09284_at-2_NA_illumina        | LIM and senescent cell antigen-like        | 4120.6226 |
| 9319 | U76010_at_GI_34222155-S        | Putative zinc transporter ZnT-3 (ZnT-3)    | 4122.2573 |

|      |                                |                                            |           |
|------|--------------------------------|--------------------------------------------|-----------|
| 9320 | AA315807_at_GI_20555412-S      | EST: EST187567 Colon carcinoma (HCC)       | 4122.4126 |
| 9321 | M99701_at_GI_4759215-S         | (pp21) mRNA                                | 4122.7563 |
| 9322 | W21426_at_GI_7662319-S         | KIAA0806 gene product                      | 4123.0527 |
| 9323 | R28587_at_GI_7662509-S         | EST: yh56b11.r1 Homo sapiens cDNA          | 4123.462  |
| 9324 | AA455208_at_GI_21361698-S      | D site of albumin promoter (albumin D-box) | 4124.5645 |
| 9325 | U62015_at_GI_34222286-S        | Cyr61 mRNA                                 | 4125.038  |
| 9326 | M14660_at-2_NA_illumina        | Interferon-induced protein 54              | 4125.6187 |
| 9327 | M14660_at_GI_34222091-S        | ISG-54K gene (interferon stimulated gene)  | 4125.6187 |
| 9328 | U01038_at_GI_34147632-S        | PLK mRNA                                   | 4126.3765 |
| 9329 | RC_AA609576_at_NA_illumina     | KIAA0331 gene product                      | 4128.206  |
| 9330 | AA504538_at_GI_32698762-S      | EST: aa60b09.r1 NCI_CGAP_GCB1              | 4128.5454 |
| 9331 | C00225_s_at_NA_illumina        | EST: HUMGS0005889, Human Gene              | 4128.8047 |
| 9332 | M17262_at-2_NA_illumina        | Coagulation factor II (thrombin)           | 4130.5405 |
| 9333 | M17262_at_GI_5922005-S         | PROTHROMBIN PRECURSOR                      | 4130.5405 |
| 9334 | RC_AA102581_at_GI_42415502-S   | EST: zn42d02.s1 Stratagene endothelial     | 4130.7065 |
| 9335 | RC_AA452552_at_GI_4501870-S    | Acyl-Coenzyme A oxidase 3, pristanoyl      | 4130.8486 |
| 9336 | RC_AA393823_at_NA_illumina     | Homo sapiens mRNA for KIAA0733             | 4133.3145 |
| 9337 | M55267_at_GI_7657074-S         | EVI2A PROTEIN PRECURSOR TROPIC             | 4134.4106 |
| 9338 | M55267_at-2_NA_illumina        | EVI2A PROTEIN PRECURSOR TROPIC             | 4134.4106 |
| 9339 | RC_AA136660_f_at_NA_illumina   | EST: zk99a04.s1 Soares pregnant uterus     | 4135.0703 |
| 9340 | RC_AA039758_at_NA_illumina     | EST: zk40g10.s1 Soares pregnant uterus     | 4135.2725 |
| 9341 | U73477_s_at_GI_20127493-S      | HLA-DR ASSOCIATED PROTEIN I                | 4135.674  |
| 9342 | RC_AA465527_at_NA_illumina     | EST: aa32c07.s1 NCI_CGAP_GCB1              | 4136.0654 |
| 9343 | W52858_at_NA_illumina          | EST: zc03d06.r1 Soares parathyroid tumor   | 4136.5767 |
| 9344 | RC_AA156792_at_NA_illumina     | EST: zl18h06.s1 Soares pregnant uterus     | 4136.9434 |
| 9345 | T92791_at_NA_illumina          | EST: ye23a04.r1 Homo sapiens cDNA          | 4138.1304 |
| 9346 | AA410529_s_at_NA_illumina      | EST: zv23a01.r1 Soares NhHMPu S1           | 4138.719  |
| 9347 | AB000896_at_GI_14270498-A      | Cadherin FIB2, partial cds                 | 4139.584  |
| 9348 | AA449376_at_NA_illumina        | EST: zx04c11.r1 Soares total fetus         | 4139.749  |
| 9349 | HG3995-HT4265_at_NA_illumina   | Cpg-Enriched Dna, Clone S19                | 4140.8545 |
| 9350 | AA207264_at_NA_illumina        | EST: zq55a07.r1 Stratagene                 | 4141.37   |
| 9351 | AA283988_s_at_NA_illumina      | EST: zs48a10.r1 NCI_CGAP_GCB1 Homo         | 4141.4404 |
| 9352 | W27179_at_NA_illumina          | BCL2/adenovirus E1B 19kD-interacting       | 4142.9683 |
| 9353 | M24439_at_GI_13787192-S        | ALPL Alkaline phosphatase,                 | 4143.132  |
| 9354 | AD000092_cds1_at-2_NA_illumina | Phenylalanine-tRNA synthetase-             | 4143.4824 |
| 9355 | AD000092_cds1_at_NA_illumina   | Hypothetical human serine-threonine        | 4143.4824 |
| 9356 | AA426176_at_NA_illumina        | EST: zw11d03.r1 Soares NhHMPu S1           | 4143.671  |
| 9357 | T55087_s_at_NA_illumina        | EST: yb45c08.r1 Homo sapiens cDNA          | 4144.503  |
| 9358 | RC_AA465367_at_NA_illumina     | EST: aa23d09.s1 NCI_CGAP_GCB1              | 4145.134  |
| 9359 | X14448_at_GI_4504008-S         | ALPHA-GALACTOSIDASE A                      | 4147.026  |
| 9360 | RC_AA131047_s_at_GI_21166383-  | KIAA0698 gene product                      | 4147.1475 |
| 9361 | W19089_s_at_NA_illumina        | EST: zb14f12.r1 Soares fetal lung          | 4147.1733 |
| 9362 | RC_AA088458_at_NA_illumina     | EST: zl82a09.s1 Stratagene colon           | 4147.659  |

|      |                                |                                         |           |
|------|--------------------------------|-----------------------------------------|-----------|
| 9363 | H07011_at_NA_illumina          | EST: yl81e01.r1 Homo sapiens cDNA       | 4147.952  |
| 9364 | AA323787_at_NA_illumina        | EST: EST26646 Cerebellum II Homo        | 4148.2    |
| 9365 | U14193_at_GI_4758485-S         | TFIIA gamma subunit mRNA                | 4148.653  |
| 9366 | RC_AA195260_at_NA_illumina     | EST: zr36g02.s1 Soares NhHMPu S1        | 4148.803  |
| 9367 | X53296_s_at_GI_27894318-A      | IL1RN Interleukin 1 receptor antagonist | 4149.065  |
| 9368 | RC_AA447671_at_NA_illumina     | EST: aa18b05.s1 Soares NhHMPu S1        | 4149.358  |
| 9369 | U77942_at_NA_illumina          | Syntaxin 7                              | 4149.3853 |
| 9370 | D31884_at_GI_34222319-S        | KIAA0063 gene                           | 4150.361  |
| 9371 | RC_D59324_at_GI_34916053-S     | EST: Human fetal brain cDNA 3'-end GEN- | 4150.8447 |
| 9372 | W26898_at_NA_illumina          | EST: 16a4 Human retina cDNA randomly    | 4151.051  |
| 9373 | RC_AA446650_at_NA_illumina     | EST: zw89g02.s1 Soares total fetus      | 4152.0645 |
| 9374 | RC_AA126336_at_GI_23618925-S   | EST: zm79h06.s1 Stratagene              | 4152.182  |
| 9375 | AA252929_at_NA_illumina        | H2A histone family, member X            | 4152.3457 |
| 9376 | M57567_at_GI_6995999-S         | ARF5 ADP-ribosylation factor 5          | 4153.6206 |
| 9377 | RC_AA150928_at_GI_22547127-A   | EST: zl47e06.s1 Soares pregnant uterus  | 4154.6377 |
| 9378 | C01622_at_NA_illumina          | EST: HUMGS0008630, Human Gene           | 4155.2944 |
| 9379 | U45285_at_GI_19924146-A        | Specific 116-kDa vacuolar proton pump   | 4155.3975 |
| 9380 | RC_AA179787_at_GI_5031956-A    | Homo sapiens mRNA for JM26 protein,     | 4156.076  |
| 9381 | M63928_at_GI_23510435-S        | CD27 CD27 antigen (T cell activation    | 4156.1694 |
| 9382 | HG4011-HT4804_s_at_NA_illumina | Dystrophin-Associated Glycoprotein, 50  | 4156.557  |
| 9383 | RC_AA453761_at_GI_33563285-S   | Homo sapiens mRNA for KIAA0770          | 4156.713  |
| 9384 | RC_AA235465_at_NA_illumina     | EST: zt31b07.s1 Soares ovary tumor      | 4157.1523 |
| 9385 | RC_AA412174_s_at_NA_illumina   | Nucleoporin 88kD                        | 4158.139  |
| 9386 | RC_AA463195_at_NA_illumina     | EST: zx71a12.s1 Soares total fetus      | 4158.263  |
| 9387 | RC_AA441798_at_GI_21361426-S   | EST: zw62c11.s1 Soares total fetus      | 4158.667  |
| 9388 | M60750_f_at_GI_21536482-S      | Histone H2B.1 (H2B) gene                | 4158.7993 |
| 9389 | RC_AA236477_at_NA_illumina     | EST: zr75c02.s1 Soares NhHMPu S1        | 4159.2783 |
| 9390 | RC_AA034364_at_NA_illumina     | EST: zf02a11.s1 Soares fetal heart      | 4159.41   |
| 9391 | AA422159_at_NA_illumina        | Homo sapiens chromosome 19, cosmid      | 4161.246  |
| 9392 | X76732_at_GI_4826869-S         | DNA-BINDING PROTEIN NEFA                | 4162.92   |
| 9393 | S66541_s_at_NA_illumina        | B-50=neural phosphoprotein [human,      | 4164.4097 |
| 9394 | AA485805_at_GI_32698739-S      | EST: zx91b11.r1 Soares ovary tumor      | 4164.5737 |
| 9395 | R80332_at_NA_illumina          | EST: yi96b05.r1 Homo sapiens cDNA       | 4165.3955 |
| 9396 | R50328_f_at_NA_illumina        | Homo sapiens mRNA for ADP ribosylation  | 4165.4097 |
| 9397 | T97156_at_NA_illumina          | Ye50c10.r1 Homo sapiens cDNA clone      | 4165.733  |
| 9398 | AA075427_at_GI_34147344-S      | EST: zm87a05.r1 Stratagene ovarian      | 4166.2876 |
| 9399 | AA084529_at_NA_illumina        | Human Chromosome 16 BAC clone           | 4166.4336 |
| 9400 | X83863_at_NA_illumina          | PTGER3 Prostaglandin E receptor 3       | 4166.511  |
| 9401 | RC_AA024658_at_NA_illumina     | Ribosomal protein S19                   | 4166.877  |
| 9402 | AA373890_at_NA_illumina        | Splicing factor, arginine/serine-rich 9 | 4167.56   |
| 9403 | RC_AA293533_f_at_NA_illumina   | EST: zt54g04.s1 Soares ovary tumor      | 4168.1875 |
| 9404 | RC_D59294_at_NA_illumina       | EST: Human fetal brain cDNA 3'-end GEN- | 4168.669  |
| 9405 | RC_AA284356_at_GI_14150079-S   | EST: zs56h05.s1 NCI_CGAP_GCB1           | 4168.7183 |

|      |                              |                                              |           |
|------|------------------------------|----------------------------------------------|-----------|
| 9406 | AB002321_at_GI_42660388-S    | Human mRNA for KIAA0323 gene, partial        | 4168.8413 |
| 9407 | AA314779_at_GI_36054181-S    | EST: EST186601 Colon carcinoma (HCC)         | 4169.1685 |
| 9408 | AA236436_at_GI_30348976-S    | Human DNA sequence from clone 327J16         | 4169.5073 |
| 9409 | M14777_s_at_NA_illumina      | Glutathione S-transferase A2                 | 4170.2075 |
| 9410 | M61854_s_at_NA_illumina      | Cytochrome P450, subfamily IIC               | 4170.3784 |
| 9411 | U85773_at_GI_4557838-S       | Phosphomannomutase 2                         | 4170.5815 |
| 9412 | RC_AA279781_at_NA_illumina   | EST: zs87e07.s1 NCI_CGAP_GCB1                | 4171.894  |
| 9413 | U51903_at_GI_5729886-S       | RasGAP-related protein (IQGAP2) mRNA         | 4172.5    |
| 9414 | RC_AA421051_at_NA_illumina   | Homo sapiens serum-inducible kinase          | 4173.5127 |
| 9415 | R54918_at_GI_21362087-S      | Yj78h06.r1 Homo sapiens cDNA clone           | 4173.55   |
| 9416 | RC_AA479350_at_GI_31341870-S | EST: zv17d09.s1 Soares NhHMPu S1             | 4173.6016 |
| 9417 | AA458584_at_NA_illumina      | SRY (sex determining region Y)-box 4         | 4174.1235 |
| 9418 | D86962_at_NA_illumina        | KIAA0207 gene                                | 4174.1597 |
| 9419 | AA220236_at_GI_4826975-S     | EST: PMY0284 KG1-a Lambda Zap                | 4174.6167 |
| 9420 | RC_AA169253_at_NA_illumina   | EST: zp19e02.s1 Stratagene fetal retina      | 4174.6895 |
| 9421 | AB002362_at_GI_45505166-S    | Human mRNA for KIAA0364 gene,                | 4175.2197 |
| 9422 | RC_AA031379_at_NA_illumina   | EST: zk15f11.s1 Soares pregnant uterus       | 4176.2305 |
| 9423 | RC_AA161085_at_GI_21359910-S | EST: zo62h09.s1 Stratagene pancreas          | 4176.3643 |
| 9424 | RC_AA477743_at_NA_illumina   | EST: zu34a11.s1 Soares ovary tumor           | 4177.018  |
| 9425 | AA278243_at_GI_8922963-S     | EST: zs77b11.r1 NCI_CGAP_GCB1 Homo           | 4177.142  |
| 9426 | RC_AA233924_at_NA_illumina   | EST: zr49e08.s1 Soares NhHMPu S1             | 4177.649  |
| 9427 | J03161_at_GI_4507204-S       | SRF Serum response factor (c-fos serum       | 4178.1113 |
| 9428 | U71598_at_GI_19743797-A      | Zinc finger protein zfp2 (zf2) mRNA, partial | 4178.281  |
| 9429 | U71598_at-2_NA_illumina      | Human zinc finger protein zfp2 (zf2)         | 4178.281  |
| 9430 | RC_AA321146_at_NA_illumina   | EST: EST23600 Frontal lobe Homo              | 4178.5986 |
| 9431 | AB002318_at_NA_illumina      | KIAA0320 gene, partial cds                   | 4179.041  |
| 9432 | W28450_at_NA_illumina        | Human TAR DNA-binding protein-43             | 4179.17   |
| 9433 | T39763_s_at_NA_illumina      | EST: ya11c05.r3 Homo sapiens cDNA            | 4179.19   |
| 9434 | RC_AA181568_s_at_NA_illumina | EST: zp51c10.s1 Stratagene HeLa cell s3      | 4180.1304 |
| 9435 | R67290_at_NA_illumina        | Homo sapiens clone 24607 mRNA                | 4180.729  |
| 9436 | RC_AA428603_at_NA_illumina   | EST: zw69c02.s1 Soares testis NHT            | 4181.094  |
| 9437 | RC_AA346345_at_GI_30425541-S | Homo sapiens mRNA for KIAA0732               | 4181.456  |
| 9438 | M24486_s_at_GI_4505564-S     | P4HA Procollagen-proline, 2-oxoglutarate     | 4181.592  |
| 9439 | AB002316_at_GI_37543880-S    | Human mRNA for KIAA0318 gene, partial        | 4182.2793 |
| 9440 | Z35094_at_GI_19557686-S      | H.sapiens mRNA for SURF-2                    | 4183.057  |
| 9441 | AA485536_at_GI_4758895-S     | Peroxisomal biogenesis factor 14             | 4183.274  |
| 9442 | D16181_at_GI_45269147-S      | PMP2 Peripheral myelin protein 2             | 4185.0205 |
| 9443 | RC_AA476937_s_at_NA_illumina | EST: zu38d11.s1 Soares ovary tumor           | 4185.358  |
| 9444 | W39246_s_at_NA_illumina      | Human zinc-finger domain-containing          | 4187.133  |
| 9445 | H46617_at_NA_illumina        | Yp19h01.r1 Homo sapiens cDNA clone           | 4188.027  |
| 9446 | X69141_at_GI_31542631-S      | FARNESYL-DIPHOSPHATE                         | 4188.401  |
| 9447 | W19662_at_NA_illumina        | EST: zb36d12.r1 Soares parathyroid tumor     | 4189.1924 |
| 9448 | X07820_at_GI_4505204-S       | MMP10 Matrix metalloproteinase 10            | 4189.7773 |

|      |                              |                                           |           |
|------|------------------------------|-------------------------------------------|-----------|
| 9449 | RC_AA449297_at_GI_16904386-S | EST: zx08c03.s1 Soares total fetus        | 4190.1904 |
| 9450 | AA256809_at_NA_illumina      | EST: zr81b03.r1 Soares NhHMPu S1          | 4191.2334 |
| 9451 | AA193428_at_NA_illumina      | Homo sapiens mRNA for KIAA0602            | 4191.6216 |
| 9452 | M23114_at_GI_27886536-A      | ATP2A2 ATPase, Ca++ transporting,         | 4192.562  |
| 9453 | M91083_at_NA_illumina        | DNA-binding protein (HRC1) mRNA           | 4193.2925 |
| 9454 | RC_AA233933_at_NA_illumina   | EST: zr49f08.s1 Soares NhHMPu S1          | 4194.468  |
| 9455 | AA489287_at_NA_illumina      | Ab36e04.r1 Stratagene HeLa cell s3        | 4194.512  |
| 9456 | U11090_at_GI_4757791-S       | Hydroxyindole-O-methyltransferase         | 4196.4165 |
| 9457 | RC_AA608772_at_GI_5453637-S  | EST: af04b05.s1 Soares testis NHT Homo    | 4196.4688 |
| 9458 | AA044842_at_GI_7705267-S     | EST: zk74e12.r1 Soares pregnant uterus    | 4198.557  |
| 9459 | RC_AA278907_at_GI_16905515-A | EST: zs81c10.s1 NCI_CGAP_GCB1             | 4198.627  |
| 9460 | RC_AA400251_at_GI_40254820-S | EST: zu62e11.s1 Soares testis NHT Homo    | 4198.7383 |
| 9461 | T08287_at_GI_38454193-S      | EST: EST06178 Homo sapiens cDNA           | 4199.2715 |
| 9462 | H51340_at_GI_38372910-S      | EST: yo30c06.r1 Homo sapiens cDNA         | 4199.2983 |
| 9463 | M29273_at_GI_18104955-A      | MAG Myelin-associated glycoprotein        | 4200.393  |
| 9464 | M83652_s_at_GI_4505736-S     | PFC Properdin P factor, complement        | 4205.7363 |
| 9465 | R80333_at_GI_22547113-A      | EST: yi96b06.r1 Homo sapiens cDNA         | 4206.184  |
| 9466 | N42196_at_NA_illumina        | Homo sapiens clone 486790                 | 4207.565  |
| 9467 | Y11651_at-2_NA_illumina      | RNA 3'-terminal phosphate cyclase         | 4207.9546 |
| 9468 | Y11651_at_GI_4506588-S       | Phosphate cyclase                         | 4207.9546 |
| 9469 | AF002668_at_NA_illumina      | Membrane fatty acid (lipid) desaturase    | 4208.127  |
| 9470 | W26360_at_NA_illumina        | Chromogranin B (secretogranin 1)          | 4208.5947 |
| 9471 | RC_AA449197_at_NA_illumina   | EST: zx03h02.s1 Soares total fetus        | 4208.775  |
| 9472 | X59812_at_GI_13904863-S      | CYP27 Cytochrome P450, subfamily XXVII    | 4208.9634 |
| 9473 | RC_AA176690_at_GI_44771210-S | EST: zp05a03.s1 Stratagene ovarian        | 4209.504  |
| 9474 | RC_AA621202_at_NA_illumina   | EST: zu81d06.s1 Soares testis NHT Homo    | 4209.52   |
| 9475 | RC_AA291429_at_GI_37059730-S | EST: zt41h08.s1 Soares ovary tumor        | 4209.5444 |
| 9476 | R25043_at_GI_37059735-S      | Yg41h10.r1 Homo sapiens cDNA clone        | 4210.2085 |
| 9477 | RC_AA482007_at_GI_8922412-S  | EST: zu98b08.s1 NCI_CGAP_GCB1             | 4210.516  |
| 9478 | AA137107_at_NA_illumina      | EST: zl02a06.r1 Soares pregnant uterus    | 4210.9    |
| 9479 | M86933_at_NA_illumina        | AMELY Amelogenin (chromosome Y            | 4210.909  |
| 9480 | RC_AA469948_at_NA_illumina   | EST: zt98h04.s1 Soares testis NHT Homo    | 4211.8774 |
| 9481 | U58681_at_GI_21314637-S      | Neurogenic basic-helix-loop-helix protein | 4213.2637 |
| 9482 | RC_AA443658_at_GI_4507546-S  | Transmembrane 7 superfamily member 2      | 4213.642  |
| 9483 | RC_AA435571_at_NA_illumina   | EST: zt73g10.s1 Soares testis NHT Homo    | 4214.5083 |
| 9484 | RC_AA401091_at_NA_illumina   | EST: zu52d09.s1 Soares ovary tumor        | 4214.8755 |
| 9485 | RC_AA213667_at_GI_40254984-S | EST: zr93e10.s1 NCI_CGAP_GCB1 Homo        | 4215.2236 |
| 9486 | N46086_s_at_NA_illumina      | EST: yy58c09.r1 Homo sapiens cDNA         | 4215.58   |
| 9487 | W61377_at_NA_illumina        | EST: zd27g09.r1 Soares fetal heart        | 4216.338  |
| 9488 | X07767_at_NA_illumina        | PRKACA Protein kinase, cAMP-              | 4217.7856 |
| 9489 | U09825_at_GI_16445440-S      | ZNF173 Acid finger protein ZNF173         | 4218.1274 |
| 9490 | C02486_at_GI_34996486-S      | EST: HUMGS0012376, Human Gene             | 4219.331  |
| 9491 | RC_AA487195_at_NA_illumina   | EST: ab19e09.s1 Stratagene lung           | 4219.92   |

|      |                              |                                          |           |
|------|------------------------------|------------------------------------------|-----------|
| 9492 | RC_AA463504_at_NA_illumina   | EST: zx72c11.s1 Soares total fetus       | 4220.466  |
| 9493 | AA428006_at_NA_illumina      | H.sapiens gene from PAC 295C6, similar   | 4221.611  |
| 9494 | L48546_at-2_NA_illumina      | Tuberous sclerosis 2                     | 4222.0737 |
| 9495 | L48546_at_GI_10938009-A      | TSC2 Tuberin                             | 4222.0737 |
| 9496 | U14747_at_GI_34222152-S      | VSNL1 Visinin-like 1                     | 4222.1147 |
| 9497 | T39176_s_at_NA_illumina      | EST: ya01f08.r2 Homo sapiens cDNA        | 4222.201  |
| 9498 | AA247591_s_at_GI_34147323-S  | Homo sapiens CAGH3 mRNA, complete        | 4223.093  |
| 9499 | RC_AA459293_at_NA_illumina   | EST: zx89b07.s1 Soares ovary tumor       | 4223.432  |
| 9500 | D38549_at_GI_24307968-S      | KIAA0068 gene, partial cds               | 4223.5205 |
| 9501 | U22431_s_at_GI_31077210-A    | MOP1 mRNA                                | 4223.941  |
| 9502 | U00952_at_GI_19923829-S      | Clone A9A2BRB7 (CAC)n/(GTG)n repeat-     | 4224.4546 |
| 9503 | RC_AA488289_at_GI_4504034-S  | EST: ae30b09.s1 Gessler Wilms tumor      | 4224.5312 |
| 9504 | L05148_at-2_NA_illumina      | Zeta-chain (TCR) associated protein      | 4224.833  |
| 9505 | L05148_at_GI_31455610-S      | Protein tyrosine kinase related mRNA     | 4224.833  |
| 9506 | RC_AA236947_at_GI_33147079-S | EST: zs43c01.s1 Soares NhHMPu S1         | 4225.1675 |
| 9507 | AA411756_at_NA_illumina      | EST: zv11b06.r1 Soares NhHMPu S1         | 4225.336  |
| 9508 | X55990_rna1_at_GI_45243506-S | ECP gene for eosinophil cationic protein | 4225.732  |
| 9509 | W27496_at_NA_illumina        | EST: 33e2 Human retina cDNA randomly     | 4225.9976 |
| 9510 | M65214_s_at_NA_illumina      | TCF3 Transcription factor 3 (E2A         | 4226.3306 |
| 9511 | RC_AA236460_at_NA_illumina   | EST: zr75h04.s1 Soares NhHMPu S1         | 4227.101  |
| 9512 | X52560_s_at_GI_28872795-S    | CCAAT/enhancer binding protein (C/EBP),  | 4228.121  |
| 9513 | RC_AA243582_at_GI_21361729-S | Hemoglobin, gamma A                      | 4228.96   |
| 9514 | AA313213_at_GI_6552331-S     | Homo sapiens flotillin-1 mRNA, complete  | 4229.554  |
| 9515 | M34175_at_GI_4557468-S       | CLAPB1 Clathrin-                         | 4229.923  |
| 9516 | RC_AA460257_at_NA_illumina   | EST: zx67d07.s1 Soares total fetus       | 4230.243  |
| 9517 | X07732_at_GI_4504480-A       | HPN Hepsin                               | 4230.4043 |
| 9518 | AA476639_at_GI_8051578-S     | EST: zw85e11.r1 Soares total fetus       | 4231.372  |
| 9519 | RC_AA456646_at_NA_illumina   | EST: aa01c05.s1 Soares NhHMPu S1         | 4232.925  |
| 9520 | J00314_at_GI_4507728-S       | mRNA fragment encoding beta-tubulin.     | 4233.9556 |
| 9521 | RC_AA406484_at_GI_20336312-A | EST: zv11e05.s1 Soares NhHMPu S1         | 4234.877  |
| 9522 | RC_AA621471_at_NA_illumina   | EST: af92d09.s1 Soares total fetus       | 4236.867  |
| 9523 | U53830_at_GI_4809285-A       | Interferon regulatory factor 7 (humirf7) | 4237.1157 |
| 9524 | M93284_at_GI_37059783-S      | Pancreatic lipase related protein 2      | 4237.9453 |
| 9525 | RC_AA191336_at_GI_14249385-S | EST: zp88c05.s1 Stratagene HeLa cell s3  | 4238.4126 |
| 9526 | J05252_s_at_GI_20336243-S    | PCSK2 Proprotein convertase              | 4238.6064 |
| 9527 | Y00097_s_at_GI_4809275-A     | ANX6 Annexin VI (p68)                    | 4240.018  |
| 9528 | D28476_at_GI_10863902-S      | KIAA0045 gene                            | 4240.0664 |
| 9529 | U37689_at_GI_14589952-S      | RNA polymerase II subunit (hsRPB8)       | 4241.0503 |
| 9530 | N35781_at_GI_7705743-S       | EST: yx81h06.r1 Homo sapiens cDNA        | 4242.8384 |
| 9531 | RC_AA428567_at_NA_illumina   | EST: zw74b07.s1 Soares testis NHT        | 4242.8994 |
| 9532 | RC_AA233790_at_GI_24475986-S | EST: zr44c08.s1 Soares NhHMPu S1         | 4242.976  |
| 9533 | AA400333_at_GI_34147604-S    | Homo sapiens clone 24619 mRNA            | 4245.507  |
| 9534 | AA024641_at_NA_illumina      | EST: ze79a04.r1 Soares fetal heart       | 4246.122  |

|      |                              |                                           |           |
|------|------------------------------|-------------------------------------------|-----------|
| 9535 | RC_AA451877_at_GI_37546892-S | EST: zx16e06.s1 Soares total fetus        | 4246.6455 |
| 9536 | T99604_at_NA_illumina        | Ye65g07.r1 Homo sapiens cDNA clone        | 4247.294  |
| 9537 | AA464043_s_at_NA_illumina    | EST: zx86c06.r1 Soares ovary tumor        | 4247.3105 |
| 9538 | N41849_at_GI_27764872-S      | EST: yw72c02.r1 Homo sapiens cDNA         | 4247.7427 |
| 9539 | RC_D59337_at_NA_illumina     | EST: Human fetal brain cDNA 3'-end GEN-   | 4248.389  |
| 9540 | RC_AA478575_at_NA_illumina   | EST: zv09g07.s1 Soares NhHMPu S1          | 4248.559  |
| 9541 | X94910_at_NA_illumina        | ERp31 protein                             | 4249.88   |
| 9542 | AA195166_at_GI_40548400-S    | EST: zr35h07.r1 Soares NhHMPu S1          | 4250.1665 |
| 9543 | U27328_s_at_NA_illumina      | Fucosyltransferase 3 (galactoside 3(4)-L- | 4250.6597 |
| 9544 | R81474_at_GI_37540070-S      | Desmin                                    | 4250.9946 |
| 9545 | RC_AA403116_at_GI_45439322-S | Homo sapiens U-snRNP-associated           | 4251.1714 |
| 9546 | AA227678_at_NA_illumina      | Human DNA sequence from clone 465N24      | 4254.023  |
| 9547 | C15772_at_NA_illumina        | EST: Human fetal brain cDNA 5'-end GEN-   | 4257.253  |
| 9548 | RC_AA456115_s_at_NA_illumina | EST: aa17f11.s1 Soares NhHMPu S1          | 4257.3477 |
| 9549 | N78018_at_GI_8923349-S       | EST: yv71a07.r1 Soares fetal liver spleen | 4257.5654 |
| 9550 | X52947_at_NA_illumina        | GJA1 Cardiac gap junction protein         | 4258.423  |
| 9551 | RC_AA621159_at_NA_illumina   | EST: af61g01.s1 Soares NhHMPu S1          | 4258.994  |
| 9552 | M17863_s_at_NA_illumina      | IGF2 Insulin-like growth factor 2         | 4259.6245 |
| 9553 | RC_AA609023_at_GI_21361846-S | EST: af10b05.s1 Soares testis NHT Homo    | 4259.7495 |
| 9554 | J05068_at_GI_21071007-S      | TCN1 Transcobalamin I                     | 4259.804  |
| 9555 | RC_AA450271_at_NA_illumina   | EST: zx42h01.s1 Soares total fetus        | 4260.712  |
| 9556 | U70451_at_GI_19923143-S      | Myleoid differentiation primary response  | 4261.4385 |
| 9557 | R50008_s_at_GI_4503320-S     | 7-dehydrocholesterol reductase            | 4261.94   |
| 9558 | U59423_at_NA_illumina        | Mad-related protein MADR1 mRNA            | 4262.2007 |
| 9559 | AF015910_at_GI_21493027-A    | Unknown protein mRNA, partial cds         | 4262.3438 |
| 9560 | HG3510-HT3704_at_NA_illumina | V-Erba Related Ear-3 Protein              | 4262.4697 |
| 9561 | RC_AA496374_at_NA_illumina   | EST: zv37f09.s1 Soares ovary tumor        | 4263.256  |
| 9562 | RC_AA021184_at_NA_illumina   | EST: ze65h11.s1 Soares retina N2b4HR      | 4265.515  |
| 9563 | W51743_at_GI_34222119-S      | EST: zc48f12.r1 Soares senescent          | 4266.212  |
| 9564 | RC_AA256162_at_NA_illumina   | EST: zr79b07.s1 Soares NhHMPu S1          | 4266.409  |
| 9565 | D79791_s_at_NA_illumina      | EST: Human aorta cDNA 5'-end GEN-         | 4266.9814 |
| 9566 | AA092898_at_NA_illumina      | EST: m0386.seq.F Fetal heart, Lambda      | 4266.9907 |
| 9567 | AA314389_at_GI_29542730-A    | EST: EST186246 Colon carcinoma (HCC)      | 4267.904  |
| 9568 | AA165564_at_GI_32698735-S    | EST: zo81d06.r1 Stratagene ovarian        | 4270.391  |
| 9569 | F15210_at_NA_illumina        | Hexosaminidase B (beta polypeptide)       | 4271.7314 |
| 9570 | AB001106_at_GI_31795542-S    | GLIA MATURATION FACTOR BETA               | 4272.4014 |
| 9571 | RC_AA429861_at_GI_31543646-S | EST: zw59a06.s1 Soares total fetus        | 4272.449  |
| 9572 | U03642_at_GI_34577064-S      | G protein-coupled receptor APJ gene       | 4273.787  |
| 9573 | W27449_at_GI_6631099-S       | Natural killer-tumor recognition sequence | 4274.181  |
| 9574 | AF000561_at_NA_illumina      | Homo sapiens HIV-1 inducer of short       | 4274.7837 |
| 9575 | RC_AA426643_at_NA_illumina   | EST: zv47h10.s1 Soares ovary tumor        | 4275.2656 |
| 9576 | AA280228_at_NA_illumina      | EST: zt04c11.r1 NCI_CGAP_GCB1 Homo        | 4276.568  |
| 9577 | X76105_at_GI_4758119-S       | DAP-1 mRNA                                | 4277.0005 |

|      |                                |                                             |           |
|------|--------------------------------|---------------------------------------------|-----------|
| 9578 | RC_AA227980_at_NA_illumina     | EST: zr58c06.s1 Soares NhHMPu S1            | 4277.049  |
| 9579 | U64444_at_GI_34222257-S        | Ubiquitin fusion-degradation protein        | 4277.2314 |
| 9580 | RC_AA150284_at_GI_30025025-S   | EST: zl07h04.s1 Soares pregnant uterus      | 4277.254  |
| 9581 | RC_AA282241_at_NA_illumina     | EST: zt12d12.s1 NCI_CGAP_GCB1 Homo          | 4278.424  |
| 9582 | AA232730_s_at_GI_37541518-S    | EST: zr75g10.r1 Soares NhHMPu S1            | 4278.792  |
| 9583 | U37012_at_GI_9558724-S         | Cleavage and polyadenylation specificity    | 4278.985  |
| 9584 | RC_AA171421_at_NA_illumina     | EST: zo97a03.s1 Stratagene ovarian          | 4279.301  |
| 9585 | R09770_at_NA_illumina          | EST: yf28a01.r1 Homo sapiens cDNA           | 4279.7715 |
| 9586 | U57971_s_at-2_NA_illumina      | ATPase, Ca++ transporting, plasma           | 4279.8677 |
| 9587 | U57971_s_at_GI_11386154-S      | Calcium ATPase isoform 3x/a mRNA            | 4279.8677 |
| 9588 | RC_AA176785_at_GI_21361740-S   | EST: zp32c11.s1 Stratagene                  | 4281.271  |
| 9589 | RC_AA428288_at_GI_39753964-S   | EST: zw57f03.s1 Soares total fetus          | 4281.442  |
| 9590 | AA446403_at_GI_40254983-S      | EST: zw60a02.r1 Soares total fetus          | 4281.628  |
| 9591 | X80198_at_GI_31543656-S        | MLN64 mRNA                                  | 4281.87   |
| 9592 | AA445907_at_GI_22035608-A      | EST: zw57e01.r1 Soares total fetus          | 4282.1616 |
| 9593 | W79046_at_NA_illumina          | Homo sapiens DBI-related protein mRNA,      | 4282.829  |
| 9594 | RC_AA455865_at_NA_illumina     | Phosphatidylinositol glycan, class B        | 4284.9478 |
| 9595 | D64109_at_GI_33589838-S        | Tob family                                  | 4284.996  |
| 9596 | X99459_at_GI_39725670-S        | Sigma 3B protein                            | 4285.014  |
| 9597 | AA293868_s_at_NA_illumina      | EST: zt61a02.r1 Soares testis NHT Homo      | 4285.8276 |
| 9598 | X00129_at_GI_8400727-S         | PLASMA RETINOL-BINDING PROTEIN              | 4286.837  |
| 9599 | X05608_at_NA_illumina          | NEUROFILAMENT TRIPLET L PROTEIN             | 4287.9995 |
| 9600 | HG2981-HT3127_s_at_NA_illumina | Epican, Alt. Splice 11                      | 4288.1924 |
| 9601 | X76228_at_GI_19913433-S        | ATP6E ATPase, H+ transporting,              | 4289.1206 |
| 9602 | U73377_at_GI_34147725-A        | SKI V-ski avian sarcoma viral oncogene      | 4289.548  |
| 9603 | AA034410_at_GI_42656348-S      | EST: ze75a02.r1 Soares fetal heart          | 4291.486  |
| 9604 | D87078_at_GI_13491167-S        | KIAA0235 gene, partial cds                  | 4291.749  |
| 9605 | AA411109_at_GI_22212941-S      | EST: zt37g06.r1 Soares ovary tumor          | 4292.376  |
| 9606 | RC_AA262485_at_GI_34147593-S   | EST: zs17h07.s1 NCI_CGAP_GCB1               | 4292.632  |
| 9607 | RC_AA411207_at_NA_illumina     | Homo sapiens hJTB mRNA, complete cds        | 4293.2583 |
| 9608 | D78132_s_at_GI_20070207-S      | Ras homologue enriched in brain (RHEB)      | 4293.8267 |
| 9609 | RC_AA400980_at_GI_34452683-A   | EST: zu51c07.s1 Soares ovary tumor          | 4294.221  |
| 9610 | W26392_at_NA_illumina          | EST: 30g3 Human retina cDNA randomly        | 4294.444  |
| 9611 | RC_AA227780_at_GI_10947034-S   | EST: zr57h02.s1 Soares NhHMPu S1            | 4294.4624 |
| 9612 | AA249311_at_GI_30149009-S      | EST: j0071.seq.F Human fetal heart,         | 4294.5703 |
| 9613 | U40002_s_at_GI_21328445-S      | Hormone-sensitive lipase testicular isoform | 4294.946  |
| 9614 | U40002_s_at-2_NA_illumina      | Lipase, hormone-sensitive                   | 4294.946  |
| 9615 | AA421712_at_GI_42658289-S      | Zu26g11.r1 Soares ovary tumor NbHOT         | 4294.9604 |
| 9616 | M27281_at_GI_30172563-S        | VEGF Vascular endothelial growth factor     | 4295.3037 |
| 9617 | AA461618_s_at_NA_illumina      | EST: zx68b02.r1 Soares total fetus          | 4296.1772 |
| 9618 | M91670_at_GI_7657045-S         | Ubiquitin carrier protein (E2-EPF) mRNA     | 4297.442  |
| 9619 | RC_AA255846_s_at_GI_32528296-  | Ribosomal protein S6 kinase, 90kD,          | 4297.637  |
| 9620 | RC_AA461455_at_NA_illumina     | EST: zx68d02.s1 Soares total fetus          | 4297.882  |



|      |                              |                                               |           |
|------|------------------------------|-----------------------------------------------|-----------|
| 9621 | L48513_at_GI_4505952-S       | Paraoxonase (PON2) mRNA                       | 4298.0767 |
| 9622 | RC_AA283930_at_NA_illumina   | EST: zs47h10.s1 NCI_CGAP_GCB1                 | 4298.324  |
| 9623 | RC_AA281090_at_NA_illumina   | Homo sapiens mRNA for KIAA0524                | 4298.472  |
| 9624 | AA455001_s_at_NA_illumina    | EST: zx99g10.r1 Soares NhHMPu S1              | 4299.3716 |
| 9625 | N41987_at_NA_illumina        | EST: yw69b06.r1 Homo sapiens cDNA             | 4299.576  |
| 9626 | AA303722_at_NA_illumina      | PTPL1-associated RhoGAP 1                     | 4300.1816 |
| 9627 | RC_AA284143_at_NA_illumina   | Homo sapiens chromosome 1 atrophin-1          | 4302.5127 |
| 9628 | RC_AA450336_at_GI_41350304-A | Neurexin III                                  | 4303.8823 |
| 9629 | RC_AA449818_s_at_NA_illumina | Human modulator recognition factor I          | 4304.4688 |
| 9630 | L12392_at_GI_38788404-S      | HD Huntingtin (Huntington disease)            | 4304.878  |
| 9631 | RC_AA233854_at_NA_illumina   | EST: zr47a02.s1 Soares NhHMPu S1              | 4305.1533 |
| 9632 | X82895_at_GI_18765724-S      | DLG2 Homolog 2 of Drosophila large discs      | 4305.624  |
| 9633 | AA134028_at_GI_38016918-S    | EST: zl34c12.r1 Soares pregnant uterus        | 4306.2935 |
| 9634 | RC_AA173241_at_NA_illumina   | EST: zp31c03.s1 Stratagene                    | 4306.4214 |
| 9635 | RC_AA490825_at_NA_illumina   | EST: aa49g01.s1 NCI_CGAP_GCB1                 | 4306.5195 |
| 9636 | RC_AA278399_at_NA_illumina   | EST: zt08d05.s1 NCI_CGAP_GCB1 Homo            | 4307.845  |
| 9637 | T69680_at_NA_illumina        | EST: yc44f10.r1 Homo sapiens cDNA             | 4308.32   |
| 9638 | RC_AA455658_at_GI_4758579-S  | EST: aa22e05.s1 NCI_CGAP_GCB1                 | 4308.3867 |
| 9639 | RC_AA432281_at_GI_19923633-S | EST: zw78h06.s1 Soares testis NHT             | 4308.5415 |
| 9640 | RC_AA490863_at_NA_illumina   | EST: aa48a08.s1 NCI_CGAP_GCB1                 | 4308.687  |
| 9641 | RC_AA491261_at_NA_illumina   | Homo sapiens clone 23923 mRNA                 | 4309.146  |
| 9642 | RC_AA029331_at_GI_42658639-S | EST: ze95f10.s1 Soares fetal heart            | 4309.528  |
| 9643 | AA417152_at_GI_40807441-S    | EST: zu04e07.r1 Soares testis NHT Homo        | 4309.6084 |
| 9644 | X62078_at_GI_39995108-S      | GM2A GM2 ganglioside activator protein        | 4309.7837 |
| 9645 | RC_AA255820_at_NA_illumina   | EST: zr84g08.s1 Soares NhHMPu S1              | 4310.075  |
| 9646 | R10931_at_NA_illumina        | Discs, large (Drosophila) homolog 5           | 4310.4316 |
| 9647 | R64534_at_NA_illumina        | EST: yi36c12.r1 Homo sapiens cDNA             | 4310.521  |
| 9648 | RC_AA491222_at_GI_38373689-S | EST: aa47b11.s1 NCI_CGAP_GCB1                 | 4310.536  |
| 9649 | RC_AA599182_s_at_NA_illumina | Homo sapiens transcription factor SL1         | 4310.9497 |
| 9650 | N78483_at_GI_22208996-S      | EST: yz78d07.r1 Homo sapiens cDNA             | 4311.2383 |
| 9651 | RC_AA192339_at_NA_illumina   | EST: zp97g11.s1 Stratagene muscle             | 4311.308  |
| 9652 | RC_AA621096_at_NA_illumina   | Homo sapiens mRNA for ARPP-19 protein         | 4312.766  |
| 9653 | AA410746_at_NA_illumina      | EST: zt32f02.r1 Soares ovary tumor            | 4312.894  |
| 9654 | AA347664_at_GI_19923451-S    | EST: EST54022 Fetal heart II Homo             | 4313.3257 |
| 9655 | R74386_at_GI_5454055-A       | EST: yi57f10.r1 Homo sapiens cDNA clone       | 4314.0073 |
| 9656 | H06594_at_GI_40805848-A      | EST: yl82b04.r1 Homo sapiens cDNA             | 4315.1562 |
| 9657 | RC_AA400093_at_NA_illumina   | EST: zu69f04.s1 Soares testis NHT Homo        | 4315.634  |
| 9658 | RC_AA182641_at_GI_24475846-S | Homo sapiens mRNA for KIAA0850                | 4315.995  |
| 9659 | RC_AA205072_at_GI_37059782-S | ATPase, Ca <sup>++</sup> transporting, plasma | 4317.523  |
| 9660 | R22345_at_NA_illumina        | Yh26h11.r1 Homo sapiens cDNA clone            | 4319.6025 |
| 9661 | L13977_at_GI_40805839-A      | LYSOSOMAL PRO-X                               | 4319.7217 |
| 9662 | RC_AA255537_at_NA_illumina   | EST: zr85c02.s1 Soares NhHMPu S1              | 4320.2373 |
| 9663 | RC_AA234765_at_NA_illumina   | Homo sapiens mRNA for KIAA0779                | 4320.244  |

|      |                               |                                           |           |
|------|-------------------------------|-------------------------------------------|-----------|
| 9664 | RC_AA404609_s_at_NA_illumina  | EST: zt43h04.s1 Soares ovary tumor        | 4322.01   |
| 9665 | RC_AA004211_at_GI_31342410-S  | EST: zh97c05.s1 Soares fetal liver spleen | 4323.354  |
| 9666 | C16281_s_at_NA_illumina       | EST: Human aorta cDNA 5'-end GEN-         | 4323.607  |
| 9667 | W92242_s_at_NA_illumina       | EST: ze14b12.r1 Soares fetal heart        | 4325.2144 |
| 9668 | RC_AA609952_at_GI_37544117-S  | Homo sapiens mRNA for KIAA0293 gene,      | 4325.3574 |
| 9669 | D26443_at_GI_34222301-S       | EXCITATORY AMINO ACID                     | 4325.43   |
| 9670 | W76399_at_GI_33457333-S       | EST: zd66d05.r1 Soares fetal heart        | 4326.6714 |
| 9671 | AA130220_at_GI_29570786-S     | EST: zl37g12.r1 Soares pregnant uterus    | 4327.3037 |
| 9672 | D16294_at_GI_5174428-S        | 3-KETOACYL-COA THIOLASE                   | 4327.6753 |
| 9673 | L38696_at_GI_21396479-A       | Autoantigen p542 mRNA, 3' end of cds      | 4328.9756 |
| 9674 | U22029_f_at_NA_illumina       | CYP2A7 Cytochrome P450, subfamily IIA     | 4330.014  |
| 9675 | L13435_at_NA_illumina         | Human chromosome 3p21.1 gene              | 4330.7246 |
| 9676 | W24154_at_NA_illumina         | EST: zb81f02.r1 Soares senescent          | 4330.815  |
| 9677 | RC_AA131692_at_GI_24475638-S  | EST: zl34f04.s1 Soares pregnant uterus    | 4331.9023 |
| 9678 | D62588_at_NA_illumina         | EST: Human aorta cDNA 5'-end GEN-         | 4332.2754 |
| 9679 | RC_AA490885_at_NA_illumina    | EST: aa48d05.s1 NCI_CGAP_GCB1             | 4332.454  |
| 9680 | U97698_at_GI_37541340-S       | Homo sapiens secretory mucin MUC6         | 4332.705  |
| 9681 | RC_AA111881_at_GI_20127465-S  | Homer, neuronal immediate early gene, 1B  | 4333.287  |
| 9682 | RC_AA437301_at_NA_illumina    | Tumor protein D52-like 2                  | 4333.8286 |
| 9683 | U81787_at-2_NA_illumina       | Human Wnt10B mRNA, complete cds           | 4334.1377 |
| 9684 | U81787_at_GI_16936521-S       | Wnt10B mRNA                               | 4334.1377 |
| 9685 | T65327_at_NA_illumina         | EST: yc74e03.r1 Homo sapiens cDNA         | 4334.3105 |
| 9686 | RC_AA495963_at_NA_illumina    | EST: zw06b08.s1 Soares NhHMPu S1          | 4334.582  |
| 9687 | C06270_at_NA_illumina         | Homo sapiens clone FBD3 Cri-du-chat       | 4335.0273 |
| 9688 | RC_AA424881_at_GI_40548381-I  | EST: zw03c10.s1 Soares NhHMPu S1          | 4335.2017 |
| 9689 | AF005039_at_GI_16445420-A     | Secretory carrier membrane protein 3      | 4335.2773 |
| 9690 | RC_AA279787_at_GI_40807492-S  | EST: zs87f02.s1 NCI_CGAP_GCB1 Homo        | 4335.8125 |
| 9691 | RC_AA398243_at_GI_21362100-S  | EST: zt59f03.s1 Soares testis NHT Homo    | 4337.098  |
| 9692 | RC_AA454654_at_NA_illumina    | EST: zx99f06.s1 Soares NhHMPu S1          | 4337.2183 |
| 9693 | AA287696_at_GI_31881619-A     | EST: zs53g01.r1 NCI_CGAP_GCB1 Homo        | 4337.96   |
| 9694 | L22548_at_GI_18765747-A       | COL18A1 Collagen, type XVIII, alpha 1     | 4338.7026 |
| 9695 | RC_AA282147_at_GI_38202227-S  | EST: zt02b12.s1 NCI_CGAP_GCB1 Homo        | 4338.772  |
| 9696 | S69115_at_GI_20127481-S       | Granulocyte colony-stimulating factor     | 4339.4907 |
| 9697 | U79273_at_NA_illumina         | Clone 23933 mRNA sequence                 | 4340.1875 |
| 9698 | D88153_at_GI_5031774-S        | Homo sapiens mRNA for HYA22, complete     | 4340.9434 |
| 9699 | M10321_s_at_GI_9257255-S      | VON WILLEBRAND FACTOR                     | 4342.8306 |
| 9700 | RC_AA463258_s_at_GI_40255044- | EST: zx97g08.s1 Soares NhHMPu S1          | 4343.1353 |
| 9701 | L13939_s_at-2_NA_illumina     | Adaptin, beta 1 (beta prime)              | 4343.4336 |
| 9702 | L13939_s_at_GI_22027652-A     | Beta adaptin protein mRNA                 | 4343.4336 |
| 9703 | RC_AA436606_at_GI_13129005-S  | EST: zw55a11.s1 Soares total fetus        | 4343.732  |
| 9704 | RC_AA621080_at_NA_illumina    | EST: af34a05.s1 Soares total fetus        | 4343.9004 |
| 9705 | RC_AA458899_at_NA_illumina    | EST: zx88d07.s1 Soares ovary tumor        | 4344.3076 |
| 9706 | AB002384_at_NA_illumina       | KIAA0386 gene product                     | 4344.4126 |

|      |                              |                                             |           |
|------|------------------------------|---------------------------------------------|-----------|
| 9707 | U43185_s_at_GI_21618341-S    | STAT5A Signal transducer and activator of   | 4344.56   |
| 9708 | RC_AA258182_at_NA_illumina   | EST: zs35f09.s1 NCI_CGAP_GCB1 Homo          | 4344.6445 |
| 9709 | RC_AA419217_at_GI_20336278-A | EST: zv34h10.s1 Soares ovary tumor          | 4344.653  |
| 9710 | RC_AA256042_at_NA_illumina   | EST: zs29d04.s1 NCI_CGAP_GCB1               | 4345.8535 |
| 9711 | RC_AA423892_at_NA_illumina   | EST: zv79f11.s1 Soares total fetus          | 4346.0747 |
| 9712 | RC_AA449343_at_GI_40804466-S | EST: zx06g09.s1 Soares total fetus          | 4347.1772 |
| 9713 | RC_AA130719_at_NA_illumina   | EST: zo13h08.s1 Stratagene colon            | 4347.8057 |
| 9714 | RC_AA452577_at_GI_13128993-S | EST: zx35h11.s1 Soares total fetus          | 4348.4424 |
| 9715 | Z30426_at_GI_4502680-S       | CD69 CD69 antigen (early T cell activation  | 4348.809  |
| 9716 | U79298_at_NA_illumina        | Clone 23803 mRNA, partial cds               | 4349.1    |
| 9717 | U79298_at-2_NA_illumina      | Human clone 23803 mRNA, partial cds         | 4349.1    |
| 9718 | RC_AA447549_at_NA_illumina   | UDP-N-acteylglucosamine                     | 4349.5625 |
| 9719 | RC_AA453399_at_GI_21327714-S | Homo sapiens putative transcription factor  | 4351.6436 |
| 9720 | AA278194_at_GI_14211918-S    | Human DNA sequence from clone 71L16         | 4351.6523 |
| 9721 | RC_AA401658_at_GI_37555939-S | EST: zv65e09.s1 Soares total fetus          | 4351.975  |
| 9722 | Z47556_rna2_at_GI_38049015-S | Semenogelin II gene extracted from          | 4352.348  |
| 9723 | RC_AA599673_at_GI_8923085-S  | EST: ag10e10.s1 Gessler Wilms tumor         | 4353.0957 |
| 9724 | N23786_at_NA_illumina        | EST: yx35f11.r1 Homo sapiens cDNA           | 4353.5654 |
| 9725 | RC_AA496898_at_NA_illumina   | EST: ae33d05.s1 Gessler Wilms tumor         | 4354.468  |
| 9726 | AA489294_s_at_GI_37540723-S  | EST: ab36f06.r1 Stratagene HeLa cell s3     | 4354.983  |
| 9727 | M32334_at_GI_12545398-S      | ICAM2 Intercellular adhesion molecule 2     | 4355.2744 |
| 9728 | RC_AA449330_at_GI_37545578-S | EST: zx06f04.s1 Soares total fetus          | 4356.332  |
| 9729 | Z46629_at_GI_37704387-S      | SOX9 SRY (sex-determining region Y)-box     | 4356.394  |
| 9730 | RC_AA236532_s_at_NA_illumina | EST: zr66e12.s1 Soares NhHMPu S1            | 4356.9087 |
| 9731 | AA263146_at_NA_illumina      | EST: PMY0511 KG1-a Lambda Zap               | 4357.0283 |
| 9732 | W49521_at_GI_4758867-S       | Procollagen-proline, 2-oxoglutarate 4-      | 4357.301  |
| 9733 | U05659_at_GI_4557648-S       | HSD17B3 Hydroxysteroid (17-beta)            | 4357.585  |
| 9734 | X51698_s_at_NA_illumina      | SPASMOLYTIC POLYPEPTIDE                     | 4357.939  |
| 9735 | M27492_at_GI_27894331-S      | INTERLEUKIN-1 RECEPTOR, TYPE I              | 4358.4067 |
| 9736 | X73608_at_GI_15451924-S      | Testican                                    | 4359.8267 |
| 9737 | J05016_s_at_NA_illumina      | Protein disulfide isomerase related protein | 4362.8257 |
| 9738 | RC_AA521121_at_GI_32967604-A | EST: aa71h03.s1 NCI_CGAP_GCB1               | 4363.466  |
| 9739 | J05272_at_GI_34328927-A      | IMPDH1 IMP (inosine monophosphate)          | 4363.655  |
| 9740 | RC_AA435720_i_at_NA_illumina | Homo sapiens (clone ch13lambda7) alpha-     | 4364.749  |
| 9741 | RC_AA497031_at_GI_21312133-S | EST: ae32h12.s1 Gessler Wilms tumor         | 4366.7656 |
| 9742 | M20867_s_at_GI_4885280-S     | GLUD1 Glutamate dehydrogenase               | 4367.716  |
| 9743 | D00408_s_at_NA_illumina      | CYP3A7 Cytochrome P450 IIIA7 (P450-         | 4367.7485 |
| 9744 | M31523_at_GI_27777635-S      | TCF3 Transcription factor 3 (E2A)           | 4368.725  |
| 9745 | RC_AA491241_at_NA_illumina   | EST: aa49a03.s1 NCI_CGAP_GCB1               | 4368.9277 |
| 9746 | RC_AA085209_at_GI_13375743-S | EST: zn13h04.s1 Stratagene hNT neuron       | 4369.1562 |
| 9747 | RC_AA416886_at_NA_illumina   | EST: zt68h11.s1 Soares testis NHT Homo      | 4369.171  |
| 9748 | RC_AA424346_at_NA_illumina   | Human sialyltransferase SThM (sthm)         | 4369.26   |
| 9749 | U52513_at_NA_illumina        | RIG-G mRNA                                  | 4369.289  |

|      |                              |                                           |           |
|------|------------------------------|-------------------------------------------|-----------|
| 9750 | RC_AA134824_at_GI_31377842-S | EST: zI20e10.s1 Soares pregnant uterus    | 4369.317  |
| 9751 | L01087_at-2_NA_illumina      | Protein kinase C, theta                   | 4370.9946 |
| 9752 | L01087_at_GI_5453975-S       | PRKCQ Protein kinase C-theta              | 4370.9946 |
| 9753 | X76029_at_GI_5729946-S       | NEUROMEDIN U-25 PRECURSOR                 | 4371.365  |
| 9754 | L13266_s_at_GI_11496970-A    | GRIN1 Glutamate receptor, ionotropic, N-  | 4372.1177 |
| 9755 | RC_AA402000_at_GI_21361797-S | EST: zu55b03.s1 Soares ovary tumor        | 4373.6875 |
| 9756 | RC_AA401687_s_at_NA_illumina | Homo sapiens ribonuclease P protein       | 4374.1685 |
| 9757 | U30255_at_GI_40068517-S      | PGD Phosphogluconate dehydrogenase        | 4375.761  |
| 9758 | X85372_at_NA_illumina        | Sm protein F                              | 4378.7603 |
| 9759 | AA235404_at_NA_illumina      | EST: zr70b03.r1 Soares NhHMPu S1          | 4379.6123 |
| 9760 | RC_AA127818_i_at_NA_illumina | EST: zI12a02.s1 Soares pregnant uterus    | 4382.262  |
| 9761 | RC_AA193384_at_GI_18152766-S | EST: zr39h02.s1 Soares NhHMPu S1          | 4382.6235 |
| 9762 | U42408_at_GI_32455232-S      | Ladinin (LAD) mRNA                        | 4383.507  |
| 9763 | RC_AA450273_at_GI_40255185-S | EST: zx42h02.s1 Soares total fetus        | 4383.664  |
| 9764 | RC_AA302657_at_NA_illumina   | EST: EST10120 Adipose tissue, white I     | 4384.0977 |
| 9765 | RC_AA338960_at_NA_illumina   | EST: EST44060 Fetal brain I Homo          | 4384.7417 |
| 9766 | RC_AA262655_s_at_NA_illumina | EST: zs21g08.s1 NCI_CGAP_GCB1             | 4386.6787 |
| 9767 | C00771_at_NA_illumina        | ATPase type IV, phospholipid-transporting | 4387.2974 |
| 9768 | H10321_at_NA_illumina        | EST: ym03e10.r1 Homo sapiens cDNA         | 4387.843  |
| 9769 | RC_AA421789_at_NA_illumina   | EST: zu26e07.s1 Soares ovary tumor        | 4388.1455 |
| 9770 | RC_AA291159_f_at_NA_illumina | EST: zs46d03.s1 NCI_CGAP_GCB1             | 4388.3867 |
| 9771 | X77366_at_GI_4505378-S       | TCF11 Transcription factor 11 (basic      | 4388.492  |
| 9772 | AA296821_at_GI_22749326-S    | EST: EST112387 Aorta endothelial cells    | 4388.892  |
| 9773 | RC_AA076092_at_NA_illumina   | EST: zm18d04.s1 Stratagene pancreas       | 4389.4644 |
| 9774 | AA431277_at_GI_40254868-S    | EST: zw78h07.r1 Soares testis NHT Homo    | 4390.7847 |
| 9775 | U40671_at_NA_illumina        | Ligase III, DNA, ATP-dependent            | 4390.7983 |
| 9776 | M69177_at_GI_38202206-S      | MAOB Monoamine oxidase B                  | 4391.0425 |
| 9777 | RC_AA398533_at_GI_24308276-S | EST: zt73b05.s1 Soares testis NHT Homo    | 4391.3203 |
| 9778 | RC_D60700_at_NA_illumina     | EST: Human fetal brain cDNA 3'-end GEN-   | 4391.7373 |
| 9779 | RC_AA405004_at_NA_illumina   | EST: zt06e03.s1 NCI_CGAP_GCB1 Homo        | 4393.863  |
| 9780 | AA490192_at_NA_illumina      | EST: aa43f10.r1 Soares NhHMPu S1          | 4394.9346 |
| 9781 | RC_AA441939_at_GI_18426889-S | EST: zw56f03.s1 Soares total fetus        | 4395.54   |
| 9782 | X61970_at_GI_23110941-S      | PROTEASOME ZETA CHAIN                     | 4395.8774 |
| 9783 | U35234_at_GI_19743920-A      | Protein tyrosine phosphatase sigma        | 4396.0933 |
| 9784 | U35234_at-2_NA_illumina      | Protein tyrosine phosphatase, receptor    | 4396.0933 |
| 9785 | RC_AA427398_at_GI_4757793-S  | Acetylserotonin N-methyltransferase-like  | 4397.364  |
| 9786 | AA092040_at_GI_19923976-S    | EST: lI4132.seq.F Fetal heart, Lambda     | 4398.3447 |
| 9787 | RC_AA044277_at_NA_illumina   | EST: zk54h07.s1 Soares pregnant uterus    | 4398.4595 |
| 9788 | RC_AA429998_at_NA_illumina   | EST: zw65e01.s1 Soares testis NHT         | 4398.4805 |
| 9789 | L31881_at_GI_4505380-S       | NFIX Nuclear factor I/X (CCAAT-binding    | 4398.6343 |
| 9790 | L31881_at-2_NA_illumina      | Nuclear factor I/X (CCAAT-binding         | 4398.6343 |
| 9791 | RC_AA433913_at_GI_7705552-S  | EST: zw52c11.s1 Soares total fetus        | 4399.249  |
| 9792 | RC_AA450233_at_NA_illumina   | EST: zx43d06.s1 Soares total fetus        | 4399.3022 |

|      |                                |                                              |           |
|------|--------------------------------|----------------------------------------------|-----------|
| 9793 | L40387_at_GI_38016929-A        | Thyroid receptor interactor (TRIP14) gene,   | 4399.3315 |
| 9794 | U29680_at_GI_14574570-S        | Bcl-2 related (Bfl-1) mRNA                   | 4404.089  |
| 9795 | L07648_at_NA_illumina          | MXI1 mRNA                                    | 4406.072  |
| 9796 | RC_AA455175_at_NA_illumina     | EST: aa15e12.s1 Soares NhHMPu S1             | 4406.109  |
| 9797 | AA082546_at_GI_37550765-S      | EST: ze88h10.r1 Soares fetal heart           | 4406.3516 |
| 9798 | RC_AA449475_at_GI_8923213-S    | EST: zx08f10.s1 Soares total fetus           | 4406.417  |
| 9799 | W56684_at_NA_illumina          | Glycoprotein Ib (platelet), beta polypeptide | 4407.206  |
| 9800 | RC_AA113011_s_at_NA_illumina   | EST: zm65b07.s1 Stratagene fibroblast        | 4407.836  |
| 9801 | S76617_at_GI_33469981-S        | BLK Protein-tyrosine kinase blk              | 4408.179  |
| 9802 | AF000575_s_at_NA_illumina      | Human clone HL9 monocyte inhibitory          | 4408.6626 |
| 9803 | RC_AA121534_at_NA_illumina     | Ribosomal protein L24                        | 4408.906  |
| 9804 | R64412_at_NA_illumina          | EST: yi36b03.r1 Homo sapiens cDNA            | 4409.126  |
| 9805 | RC_AA609117_at_GI_34147375-S   | Homo sapiens clone ET16 ET putative          | 4410.002  |
| 9806 | AA096343_at_GI_34222122-S      | EST: I9342.seq.F Fetal heart, Lambda         | 4410.2544 |
| 9807 | AA263061_s_at_GI_34147501-S    | EST: PMY0414 KG1-a Lambda Zap                | 4410.449  |
| 9808 | AA480076_at_GI_40018643-A      | EST: zv42b07.r1 Soares ovary tumor           | 4410.4805 |
| 9809 | M74509_s_at_NA_illumina        | Endogenous retrovirus type C oncovirus       | 4413.0522 |
| 9810 | Z14978_at_NA_illumina          | ALPHA-CENTRACTIN                             | 4413.2324 |
| 9811 | AA093497_s_at_NA_illumina      | DEK gene                                     | 4413.6045 |
| 9812 | AA442216_at_GI_37539533-S      | EST: zv60g04.r1 Soares testis NHT Homo       | 4413.967  |
| 9813 | RC_AA085676_at_NA_illumina     | EST: zn53e03.s1 Stratagene muscle            | 4415.4385 |
| 9814 | D16581_at_GI_40288273-S        | MTH1 MutT (E. coli) human homolog (8-        | 4415.8633 |
| 9815 | R67702_at_NA_illumina          | Human DNA sequence from clone 283E3          | 4417.2485 |
| 9816 | U41515_at_GI_5453639-S         | Deleted in split hand/split foot 1 (DSS1)    | 4417.698  |
| 9817 | U29091_at_GI_16306549-S        | Selenium-binding protein (hSBP) mRNA         | 4417.8696 |
| 9818 | D50477_s_at-2_NA_illumina      | Homo sapiens mRNA for membrane-type          | 4418.223  |
| 9819 | D50477_s_at_GI_13027799-A      | MMP3 Matrix metalloproteinase 3              | 4418.223  |
| 9820 | AC000064_cds2_at_GI_4505724-S  | WUGSC:H_RG083M05.1 gene extracted            | 4419.079  |
| 9821 | AC000064_cds2_at-2_NA_illumina | Peroxisome biogenesis factor 1::Human        | 4419.079  |
| 9822 | RC_AA194882_at_NA_illumina     | EST: zr32e04.s1 Soares NhHMPu S1             | 4419.6743 |
| 9823 | H02675_at_GI_23111057-S        | EST: yj36g07.r1 Homo sapiens cDNA            | 4419.689  |
| 9824 | W24367_s_at_NA_illumina        | EST: zb50a07.r1 Soares fetal lung            | 4420.737  |
| 9825 | AA149507_at_NA_illumina        | Homolog of mouse quaking QKI (KH             | 4421.25   |
| 9826 | D30946_at_GI_28416942-S        | Kinesin family protein 3B                    | 4421.2773 |
| 9827 | AA313387_at_NA_illumina        | EST: EST185288 Colon carcinoma (HCC)         | 4421.6157 |
| 9828 | RC_AA135539_at_GI_12751480-S   | EST: zl09h04.s1 Soares pregnant uterus       | 4422.376  |
| 9829 | L27670_at_GI_12545400-A        | Intercellular adhesion molecule 4,           | 4423.8906 |
| 9830 | RC_AA398109_at_NA_illumina     | EST: zt58d09.s1 Soares testis NHT Homo       | 4425.8193 |
| 9831 | M34079_at_GI_24430153-S        | PROBABLE 26S PROTEASE SUBUNIT                | 4427.613  |
| 9832 | RC_AA620876_s_at_NA_illumina   | EST: af90h07.s1 Soares testis NHT Homo       | 4429.496  |
| 9833 | HG2339-HT2435_at_NA_illumina   | Nuclear Factor 1, Variant Hepatic            | 4429.7754 |
| 9834 | AA453079_at_NA_illumina        | V-erb-a avian erythroblastic leukemia viral  | 4430.3315 |
| 9835 | RC_AA436420_at_GI_22538491-A   | EST: zv44e06.s1 Soares ovary tumor           | 4430.3857 |

|      |                              |                                             |           |
|------|------------------------------|---------------------------------------------|-----------|
| 9836 | RC_D60049_at_NA_illumina     | EST: Human fetal brain cDNA 3'-end GEN-     | 4430.6104 |
| 9837 | RC_AA418072_at_GI_34577097-A | Homo sapiens HRIHFB2038 mRNA,               | 4430.87   |
| 9838 | RC_AA490232_at_NA_illumina   | EST: aa50h01.s1 NCI_CGAP_GCB1               | 4431.736  |
| 9839 | R54534_at_GI_29294648-A      | Homo sapiens clone 23938 mRNA               | 4432.5205 |
| 9840 | RC_AA281949_at_NA_illumina   | EST: zs89d12.s1 NCI_CGAP_GCB1               | 4432.693  |
| 9841 | L29218_s_at_NA_illumina      | CDC-like kinase 2                           | 4433.1084 |
| 9842 | T57286_at_NA_illumina        | EST: yb35b03.r1 Homo sapiens cDNA           | 4433.876  |
| 9843 | M68891_at_GI_31982886-S      | GATA2 GATA-binding protein 2                | 4435.0444 |
| 9844 | RC_AA045481_at_GI_32129208-S | EST: zk67h05.s1 Soares pregnant uterus      | 4435.1113 |
| 9845 | RC_AA429478_at_NA_illumina   | EST: zw34c05.s1 Soares ovary tumor          | 4435.779  |
| 9846 | RC_AA223725_at_NA_illumina   | EST: zr10e07.s1 Stratagene NT2 neuronal     | 4435.8735 |
| 9847 | RC_AA234100_at_GI_41150026-S | EST: zs39e05.s1 Soares NhHMPu S1            | 4436.1304 |
| 9848 | AA464113_at_NA_illumina      | EST: zx86f03.r1 Soares ovary tumor          | 4436.9653 |
| 9849 | AA056681_at_NA_illumina      | EST: zk80g05.r1 Soares pregnant uterus      | 4437.011  |
| 9850 | D31294_at_GI_31543361-S      | EST: Human fetal-lung cDNA 5'-end           | 4437.099  |
| 9851 | RC_AA040270_at_GI_19923718-S | EST: zf05e04.s1 Soares fetal heart          | 4437.885  |
| 9852 | R80048_at_GI_31543637-S      | EST: yi91e08.r1 Homo sapiens cDNA           | 4438.2773 |
| 9853 | L14837_at_GI_28416401-A      | TJP1 Tight junction protein 1 (zona         | 4438.716  |
| 9854 | RC_AA253339_at_NA_illumina   | EST: zr72g06.s1 Soares NhHMPu S1            | 4441.372  |
| 9855 | R33704_at_GI_4505316-S       | Myosin phosphatase, target subunit 1        | 4442.1553 |
| 9856 | RC_AA226919_at_NA_illumina   | EST: zr21a09.s1 Stratagene NT2 neuronal     | 4443.873  |
| 9857 | D83542_at_GI_16507957-S      | Cadherin-15                                 | 4444.001  |
| 9858 | RC_AA286911_at_NA_illumina   | EST: zs56d09.s1 NCI_CGAP_GCB1               | 4444.179  |
| 9859 | AA280085_at_GI_29744307-S    | EST: zs93a01.r1 NCI_CGAP_GCB1 Homo          | 4444.801  |
| 9860 | RC_AA281623_at_NA_illumina   | EST: zt03c06.s1 NCI_CGAP_GCB1 Homo          | 4444.8804 |
| 9861 | D25304_at_NA_illumina        | KIAA0006 gene, partial cds                  | 4445.014  |
| 9862 | W26651_s_at_GI_22165423-A    | Homo sapiens dynactin subunit (p22)         | 4445.6    |
| 9863 | S68616_at_GI_27777631-S      | SLC9A1 Solute carrier family 9              | 4445.6196 |
| 9864 | RC_AA040069_s_at_NA_illumina | EST: zk46d08.s1 Soares pregnant uterus      | 4445.75   |
| 9865 | AA455381_at_NA_illumina      | Human NAD+-dependent succinate-             | 4446.6587 |
| 9866 | RC_AA069250_at_NA_illumina   | EST: zf73h06.s1 Soares pineal gland         | 4447.1465 |
| 9867 | W28404_at_GI_22035596-S      | EST: 46e11 Human retina cDNA randomly       | 4447.429  |
| 9868 | AA056140_at_NA_illumina      | EST: zf55a11.r1 Soares retina N2b4HR        | 4449.6016 |
| 9869 | RC_AA418824_at_NA_illumina   | EST: zw01b03.s1 Soares NhHMPu S1            | 4450.2456 |
| 9870 | L05072_s_at_GI_4504720-S     | IRF1 Interferon regulatory factor 1         | 4450.2876 |
| 9871 | RC_AA074919_at_GI_27477130-S | EST: zm82b10.s1 Stratagene ovarian          | 4450.494  |
| 9872 | AA256355_at_NA_illumina      | EST: zr80b02.r1 Soares NhHMPu S1            | 4451.374  |
| 9873 | D43767_at_GI_22538801-S      | Chemokine                                   | 4451.503  |
| 9874 | X75958_at_NA_illumina        | TrkB {alternatively spliced} [human, brain, | 4452.686  |
| 9875 | AA444392_at_GI_4505360-S     | NADH dehydrogenase (ubiquinone) 1 beta      | 4453.4126 |
| 9876 | RC_AA452244_at_GI_13376493-S | EST: zx15f05.s1 Soares total fetus          | 4453.476  |
| 9877 | X54942_at_GI_4502858-S       | CKS2 CDC28 protein kinase 2                 | 4456.043  |
| 9878 | RC_D59971_s_at_GI_34147457-S | EST: Human fetal brain cDNA 3'-end GEN-     | 4456.5684 |

|      |                              |                                            |           |
|------|------------------------------|--------------------------------------------|-----------|
| 9879 | X92896_at_GI_24430136-S      | ITBA2 protein                              | 4456.5913 |
| 9880 | RC_AA490142_at_GI_30795118-A | EST: ab05f07.s1 Stratagene fetal retina    | 4457.657  |
| 9881 | L20971_at_GI_32171240-S      | PDE4B Phosphodiesterase 4B, cAMP-          | 4460.2515 |
| 9882 | RC_AA610073_at_GI_21361396-S | EST: af08f03.s1 Soares testis NHT Homo     | 4460.353  |
| 9883 | AA256438_at_GI_19923496-S    | EST: zr80e04.r1 Soares NhHMPu S1           | 4460.8013 |
| 9884 | RC_AA223237_at_NA_illumina   | EST: zr06g04.s1 Stratagene NT2 neuronal    | 4461.0063 |
| 9885 | M91196_at_NA_illumina        | ICSBP1 Interferon consensus sequence       | 4463.0347 |
| 9886 | L08904_at_GI_42560228-A      | H2K binding factor 2 (KBF2) mRNA           | 4463.486  |
| 9887 | L08904_at-2_NA_illumina      | Homo sapiens mRNA for H-2K binding         | 4463.486  |
| 9888 | M24766_s_at_GI_17986276-S    | COL4A2 Collagen, type IV, alpha 2          | 4463.5127 |
| 9889 | AA090295_at_NA_illumina      | Karyopherin (importin) beta 2              | 4463.676  |
| 9890 | U26174_at_GI_4504234-S       | GZMK Granzyme K (serine protease,          | 4463.786  |
| 9891 | X60708_at_GI_18765693-S      | DPP4 Dipeptidylpeptidase IV (CD26,         | 4464.444  |
| 9892 | U27333_s_at_NA_illumina      | Alpha-1,3 fucosyltransferase 6 (FCT3A)     | 4464.7354 |
| 9893 | Y00339_s_at_GI_4557394-S     | CA2 Carbonic anhydrase II                  | 4465.299  |
| 9894 | U26648_at_GI_31543665-S      | STX5A Syntaxin 5A                          | 4466.54   |
| 9895 | RC_AA047380_at_GI_19924140-A | Acetylglucosaminyltransferase-like protein | 4468.8745 |
| 9896 | X90824_s_at_GI_4507846-S     | USF2a & USF2b, clone P2                    | 4469.135  |
| 9897 | AA022453_at_NA_illumina      | EST: ze70g08.r1 Soares fetal heart         | 4469.2573 |
| 9898 | RC_AA450212_at_NA_illumina   | EST: zx43b03.s1 Soares total fetus         | 4470.9175 |
| 9899 | RC_AA449942_at_GI_6912667-S  | EST: zx38a01.s1 Soares total fetus         | 4471.188  |
| 9900 | RC_AA398346_at_GI_8923959-S  | EST: zt61d08.s1 Soares testis NHT Homo     | 4471.968  |
| 9901 | U53347_at_GI_5032092-S       | Neutral amino acid transporter B mRNA      | 4473.5845 |
| 9902 | AA405937_at_NA_illumina      | EST: zu66a10.r1 Soares testis NHT Homo     | 4474.2373 |
| 9903 | RC_AA621235_at_NA_illumina   | EST: zu81h07.s1 Soares testis NHT Homo     | 4474.5366 |
| 9904 | AA195179_s_at_GI_38202249-S  | EST: zr35h11.r1 Soares NhHMPu S1           | 4474.843  |
| 9905 | AA018509_at_NA_illumina      | EST: ze50e02.r1 Soares retina N2b4HR       | 4476.174  |
| 9906 | U33286_at_GI_29029560-A      | Chromosome segregation gene homolog        | 4476.632  |
| 9907 | L20965_at_GI_5453861-S       | Phosphodiesterase mRNA                     | 4476.6357 |
| 9908 | L20965_at-2_NA_illumina      | Phosphodiesterase 4A, cAMP-specific        | 4476.6357 |
| 9909 | S79219_s_at_GI_4557832-S     | PCCA Propionyl-coA carboxylase alpha       | 4477.545  |
| 9910 | RC_AA234308_at_NA_illumina   | EST: zr72a08.s1 Soares NhHMPu S1           | 4477.6753 |
| 9911 | AA147510_s_at_NA_illumina    | EST: zl50c12.r1 Soares pregnant uterus     | 4478.075  |
| 9912 | J03798_at-2_NA_illumina      | SMALL NUCLEAR                              | 4478.939  |
| 9913 | J03798_at_GI_28416941-S      | SMALL NUCLEAR                              | 4478.939  |
| 9914 | RC_AA112361_at_NA_illumina   | EST: zn68c10.s1 Stratagene HeLa cell s3    | 4480.0244 |
| 9915 | RC_AA481134_at_NA_illumina   | EST: aa34e01.s1 NCI_CGAP_GCB1              | 4480.8086 |
| 9916 | RC_AA084629_at_NA_illumina   | EST: zn18f10.s1 Stratagene                 | 4480.839  |
| 9917 | RC_AA233345_at_NA_illumina   | EST: zr48e02.s1 Soares NhHMPu S1           | 4481.1436 |
| 9918 | X15949_at-2_NA_illumina      | Interferon regulatory factor 2             | 4481.387  |
| 9919 | X15949_at_GI_4755144-S       | IRF2 Interferon regulatory factor 2        | 4481.387  |
| 9920 | RC_AA242799_at_GI_21361826-S | KIAA0737 gene product                      | 4481.46   |
| 9921 | W07195_at_NA_illumina        | EST: za95c12.r1 Soares fetal lung          | 4482.138  |

|      |                               |                                             |           |
|------|-------------------------------|---------------------------------------------|-----------|
| 9922 | RC_AA258178_at_GI_24475709-S  | Homo sapiens clone 23914 mRNA               | 4482.918  |
| 9923 | D16217_at_GI_27765086-A       | CAST Calpastatin                            | 4482.9697 |
| 9924 | RC_AA400482_at_GI_13236564-S  | EST: zu64g10.s1 Soares testis NHT Homo      | 4483.7124 |
| 9925 | RC_AA437278_at_NA_illumina    | EST: zv62b04.s1 Soares testis NHT Homo      | 4484.287  |
| 9926 | RC_AA039646_at_NA_illumina    | EST: zf08b11.s1 Soares fetal heart          | 4485.0063 |
| 9927 | J03934_s_at_GI_4505414-S      | NMOR1 NAD(P)H:menadione                     | 4485.6895 |
| 9928 | RC_AA448850_at_NA_illumina    | EST: zx11b11.s1 Soares total fetus          | 4485.723  |
| 9929 | RC_AA465687_at_NA_illumina    | RNA binding motif, single stranded          | 4486.432  |
| 9930 | RC_AA461320_at_NA_illumina    | EST: zx65c08.s1 Soares total fetus          | 4488.252  |
| 9931 | RC_AA609145_at_GI_37537690-S  | EST: af11g09.s1 Soares testis NHT Homo      | 4488.347  |
| 9932 | RC_AA463745_at_NA_illumina    | EST: aa07h08.s1 Soares NhHMPu S1            | 4489.3013 |
| 9933 | D29642_at_NA_illumina         | HYPOTHETICAL MYELOID CELL LINE              | 4489.3125 |
| 9934 | R12040_at_GI_23111022-S       | EST: yf53e11.r1 Homo sapiens cDNA           | 4491.8965 |
| 9935 | RC_AA026054_at_GI_33569217-S  | EST: ze86b05.s1 Soares fetal heart          | 4492.2935 |
| 9936 | AFFX-HUMGAPDH/M33197_3_st-    | Glyceraldehyde-3-phosphate                  | 4492.9863 |
| 9937 | AFFX-                         | AFFX-HUMGAPDH/M33197_3_st                   | 4492.9863 |
| 9938 | RC_AA455992_at_NA_illumina    | EST: aa02c12.s1 Soares NhHMPu S1            | 4493.3833 |
| 9939 | RC_AA009596_at_NA_illumina    | EST: ze82g09.s1 Soares fetal heart          | 4493.4985 |
| 9940 | RC_AA476749_s_at_NA_illumina  | Tumor necrosis factor receptor              | 4493.748  |
| 9941 | M22324_at_GI_4502094-S        | ANPEP Alanyl (membrane)                     | 4493.7866 |
| 9942 | RC_AA608699_at_NA_illumina    | EST: ae56b03.s1 Stratagene lung             | 4495.522  |
| 9943 | U62800_at_GI_20302137-S       | CST6 Cystatin M                             | 4496.893  |
| 9944 | M91490_s_at_NA_illumina       | EST: HUMRTPGEAI Homo sapiens cDNA.          | 4498.944  |
| 9945 | RC_AA350215_s_at_GI_21040333- | EST: EST57359 Infant brain Homo             | 4499.413  |
| 9946 | RC_AA449238_s_at_NA_illumina  | EST: zx04b11.s1 Soares total fetus          | 4499.434  |
| 9947 | RC_AA283066_at_NA_illumina    | EST: zs91h04.s1 NCI_CGAP_GCB1               | 4500.7236 |
| 9948 | D63476_at_GI_22027526-A       | KIAA0142 gene                               | 4501.857  |
| 9949 | AA318547_s_at_GI_31542585-S   | Eukaryotic translation initiation factor 4E | 4501.889  |
| 9950 | RC_AA186613_at_NA_illumina    | EST: zp71a05.s1 Stratagene endothelial      | 4501.958  |
| 9951 | RC_AA284865_at_GI_37542913-S  | EST: zt23a03.s1 Soares ovary tumor          | 4502.4634 |
| 9952 | Y11681_at_GI_16950590-A       | Mitochondrial ribosomal protein S12         | 4503.8936 |
| 9953 | RC_AA053665_at_NA_illumina    | EST: zl74f05.s1 Stratagene colon            | 4504.411  |
| 9954 | M11749_at_GI_19923361-S       | THY-1 MEMBRANE GLYCOPROTEIN                 | 4504.848  |
| 9955 | W27939_at_GI_37059724-S       | EST: 39g3 Human retina cDNA randomly        | 4505.031  |
| 9956 | U09117_at_GI_5453909-S        | Phospholipase c delta 1 mRNA                | 4507.51   |
| 9957 | AA232156_at_GI_21361453-S     | Insulin-like growth factor 2 (somatomedin   | 4507.5894 |
| 9958 | RC_AA135492_at_NA_illumina    | EST: zo28h02.s1 Stratagene colon            | 4507.7227 |
| 9959 | Y08263_at-2_NA_illumina       | Potassium intermediate/small conductance    | 4508.8154 |
| 9960 | Y08263_at_GI_25777649-A       | AAD14 protein, partial                      | 4508.8154 |
| 9961 | RC_AA252798_at_NA_illumina    | Homo sapiens mRNA for KIAA0650              | 4510.9336 |
| 9962 | RC_AA342355_s_at_NA_illumina  | EST: EST48084 Fetal spleen Homo             | 4512.0186 |
| 9963 | RC_AA443676_at_GI_42661554-S  | EST: zw86c05.s1 Soares total fetus          | 4513.9023 |
| 9964 | M21121_at_GI_22538813-S       | SCYA5 Small inducible cytokine A5           | 4515.001  |



|       |                               |                                           |           |
|-------|-------------------------------|-------------------------------------------|-----------|
| 9965  | N75608_at_GI_22547202-S       | EST: yw37a07.r1 Homo sapiens cDNA         | 4516.3545 |
| 9966  | RC_AA253216_at_GI_42476062-S  | EST: zr53g08.s1 Soares NhHMPu S1          | 4516.6787 |
| 9967  | RC_AA490911_s_at_GI_13899304- | EST: aa52c05.s1 NCI_CGAP_GCB1             | 4517.347  |
| 9968  | U45328_s_at_GI_35493995-A     | UBE2I Ubiquitin-conjugating enzyme E2I    | 4517.6562 |
| 9969  | W17119_at_NA_illumina         | EST: zb17c06.r1 Soares fetal lung         | 4518.8193 |
| 9970  | RC_AA281475_s_at_GI_8922691-S | EST: zs96e10.s1 NCI_CGAP_GCB1             | 4519.4834 |
| 9971  | RC_AA031357_at_GI_38679896-S  | EST: zk16f02.s1 Soares pregnant uterus    | 4520.8057 |
| 9972  | N28889_at_GI_4505452-S        | H.sapiens mRNA for NRD1 convertase        | 4521.589  |
| 9973  | RC_AA405049_at_NA_illumina    | EST: zu19g04.s1 Soares NhHMPu S1          | 4521.636  |
| 9974  | Z69030_s_at_NA_illumina       | PPP2R4 Protein phosphatase 2A,            | 4522.323  |
| 9975  | RC_AA453022_at_NA_illumina    | Homo sapiens clone 638 unknown mRNA,      | 4522.3823 |
| 9976  | H62705_at_NA_illumina         | Homo sapiens mRNA for NORI-1,             | 4522.3965 |
| 9977  | X99209_at_NA_illumina         | TNNC2 Troponin C2 (fast skeletal)         | 4522.862  |
| 9978  | RC_AA001976_at_NA_illumina    | EST: zh83g06.s1 Soares fetal liver spleen | 4523.055  |
| 9979  | RC_AA436477_at_NA_illumina    | EST: zv08f05.s1 Soares NhHMPu S1          | 4523.448  |
| 9980  | S65761_at_NA_illumina         | Anti-colorectal carcinoma heavy chain     | 4525.05   |
| 9981  | N75611_s_at_GI_19743804-A     | EST: yw37b04.r1 Homo sapiens cDNA         | 4527.6475 |
| 9982  | RC_AA428325_at_NA_illumina    | EST: zw18e01.s1 Soares ovary tumor        | 4527.914  |
| 9983  | U75968_at_GI_4758135-A        | CHL1 protein                              | 4528.624  |
| 9984  | RC_AA455875_at_NA_illumina    | EST: aa01d11.s1 Soares NhHMPu S1          | 4528.661  |
| 9985  | W46192_at_NA_illumina         | EST: zc30d03.r1 Soares senescent          | 4529.0356 |
| 9986  | RC_AA402484_at_GI_40786393-S  | EST: zt65c03.s1 Soares testis NHT Homo    | 4529.595  |
| 9987  | AA410355_at_GI_4506738-S      | Ribosomal protein S6 kinase, 70kD,        | 4530.2427 |
| 9988  | R78459_s_at_NA_illumina       | EST: yi82h11.r1 Homo sapiens cDNA         | 4530.404  |
| 9989  | M58525_s_at_GI_6466449-A      | COMT Catechol-O-methyltransferase         | 4531.027  |
| 9990  | AA341723_at_NA_illumina       | Human DNA sequence from clone 327J16      | 4531.233  |
| 9991  | D50683_at_GI_23308726-S       | TGFBR2 Transforming growth factor, beta   | 4532.178  |
| 9992  | RC_AA255628_at_GI_11968048-S  | EST: zs31g06.s1 NCI_CGAP_GCB1             | 4532.3667 |
| 9993  | RC_AA078932_at_NA_illumina    | EST: zm95f07.s1 Stratagene colon HT29     | 4532.8354 |
| 9994  | RC_AA150088_at_NA_illumina    | Homo sapiens mRNA for KIAA0917            | 4536.595  |
| 9995  | AA446785_at_NA_illumina       | EST: zw89e05.r1 Soares total fetus        | 4537.484  |
| 9996  | S77763_at_GI_5453773-S        | NF-E2 protein (NF-E2) mRNA                | 4537.8027 |
| 9997  | J04599_at_GI_34304351-S       | BGN Biglycan                              | 4537.8306 |
| 9998  | RC_AA258028_at_NA_illumina    | EST: zs76a05.s1 NCI_CGAP_GCB1             | 4538.3955 |
| 9999  | M55268_at_GI_38708325-S       | CSNK2A2 Casein kinase 2, alpha prime      | 4539.4307 |
| 10000 | RC_AA455970_at_NA_illumina    | Homo sapiens multiple membrane            | 4540.068  |
| 10001 | RC_AA348014_at_GI_38570092-S  | EST: EST54433 Fetal heart II Homo         | 4541.741  |
| 10002 | RC_AA398674_at_GI_8923856-S   | EST: zt70d05.s1 Soares testis NHT Homo    | 4542.8193 |
| 10003 | RC_AA250974_at_GI_42656961-S  | EST: zs07f08.s1 NCI_CGAP_GCB1 Homo        | 4544.329  |
| 10004 | D82343_at_GI_34335282-A       | AMY                                       | 4546.6934 |
| 10005 | AA094989_at_GI_25188178-S     | Homo sapiens voltage dependent anion      | 4547.5283 |
| 10006 | U38810_at_GI_18765719-S       | Mab-21 cell fate-determining protein      | 4547.7393 |
| 10007 | AA215333_at_GI_7657135-S      | EST: zr94d06.r1 NCI_CGAP_GCB1 Homo        | 4547.8447 |

|       |                              |                                              |           |
|-------|------------------------------|----------------------------------------------|-----------|
| 10008 | RC_AA127045_at_GI_19923908-S | EST: zl22b06.s1 Soares pregnant uterus       | 4548.6533 |
| 10009 | RC_AA282202_at_NA_illumina   | EST: zs89g09.s1 NCI_CGAP_GCB1                | 4549.3076 |
| 10010 | RC_AA357964_at_NA_illumina   | EST: EST66787 Fetal lung III Homo            | 4549.323  |
| 10011 | R31745_at_GI_37550191-S      | Yh67c09.r1 Homo sapiens cDNA clone           | 4549.721  |
| 10012 | AA280998_at_NA_illumina      | Zt01f07.r1 NCI_CGAP_GCB1 Homo                | 4550.15   |
| 10013 | AA465016_at_GI_22208983-A    | EST: zx80d02.r1 Soares ovary tumor           | 4551.3604 |
| 10014 | Z95636_at_GI_21264601-S      | H.sapiens mRNA for laminin alpha 5 chain     | 4551.413  |
| 10015 | RC_AA433907_at_GI_42716282-S | EST: zw52c04.s1 Soares total fetus           | 4551.6255 |
| 10016 | Z49194_at_GI_5453933-S       | OBF-1 mRNA for octamer binding factor 1      | 4552.551  |
| 10017 | RC_AA227137_at_GI_24308042-S | Homo sapiens mRNA for KIAA0828               | 4552.7104 |
| 10018 | X60673_s_at_NA_illumina      | Adenylate kinase 3                           | 4554.5557 |
| 10019 | U41654_at_GI_34147579-S      | RagA protein                                 | 4554.897  |
| 10020 | D17547_at_GI_6041666-S       | DCT Dopachrome tautomerase                   | 4556.06   |
| 10021 | T34378_s_at_NA_illumina      | GTPase, human homolog of E. coli             | 4556.854  |
| 10022 | RC_D59675_s_at_NA_illumina   | EST: Human fetal brain cDNA 3'-end GEN-      | 4557.4336 |
| 10023 | N23817_at_NA_illumina        | Homo sapiens clone 23675 mRNA                | 4557.862  |
| 10024 | X61118_rna1_at_GI_6633806-S  | TTG-2a gene extracted from Human TTG-        | 4558.0107 |
| 10025 | U51586_at_GI_17978510-A      | Siah binding protein 1 (SiahBP1) mRNA,       | 4558.301  |
| 10026 | AA247679_at_GI_23238221-S    | COP9 (constitutive photomorphogenic,         | 4560.206  |
| 10027 | H02666_at_GI_21314634-S      | Yj36f05.r1 Homo sapiens cDNA clone           | 4560.8037 |
| 10028 | RC_AA599954_at_NA_illumina   | Phosphatidylinositol glycan, class B         | 4560.8765 |
| 10029 | RC_AA394126_at_NA_illumina   | EST: zt49a08.s1 Soares ovary tumor           | 4561.909  |
| 10030 | X98253_at_NA_illumina        | ZNF183 gene                                  | 4562.583  |
| 10031 | M93426_at_GI_4506328-S       | PTPRZ Protein tyrosine phosphatase,          | 4562.8335 |
| 10032 | RC_AA422146_at_GI_35250685-S | EST: zv28g12.s1 Soares ovary tumor           | 4564.52   |
| 10033 | M16447_at_GI_4506358-S       | QDPR Dihydropteridine reductase              | 4564.643  |
| 10034 | RC_AA452265_at_NA_illumina   | Homo sapiens (clone Zap2) mRNA               | 4566.007  |
| 10035 | RC_AA620641_at_GI_23097239-S | Homo sapiens RNA polymerase II mRNA,         | 4566.2896 |
| 10036 | R56678_at_GI_33469925-A      | EST: yi04d08.r1 Homo sapiens cDNA            | 4566.4873 |
| 10037 | U40998_at_GI_16936537-A      | Retinal protein (HRG4) mRNA                  | 4570.0566 |
| 10038 | RC_AA437295_at_GI_9945385-S  | EST: zv62c12.s1 Soares testis NHT Homo       | 4571.1875 |
| 10039 | RC_AA463502_at_NA_illumina   | EST: zx72c09.s1 Soares total fetus           | 4571.807  |
| 10040 | RC_AA458882_at_GI_31343621-S | EST: zx88b09.s1 Soares ovary tumor           | 4571.8594 |
| 10041 | AA251693_at_GI_40786546-S    | EST: zs04a09.r1 NCI_CGAP_GCB1 Homo           | 4572.4556 |
| 10042 | M77698_at_GI_21464104-S      | YY1 YY1 transcription factor                 | 4573.1816 |
| 10043 | RC_AA284976_at_NA_illumina   | Human ets domain protein ERF mRNA,           | 4573.718  |
| 10044 | H83131_at_GI_21361518-S      | EST: yq48f09.r1 Homo sapiens cDNA            | 4575.1016 |
| 10045 | W68255_at_NA_illumina        | EST: zd33f12.r1 Soares fetal heart           | 4575.1436 |
| 10046 | RC_AA166895_s_at_NA_illumina | HELIX-LOOP-HELIX PROTEIN 2                   | 4575.479  |
| 10047 | RC_AA251115_at_NA_illumina   | Eukaryotic translation initiation factor 4E  | 4577.0825 |
| 10048 | M64925_at_GI_6006024-S       | MPP1 Membrane protein, palmitoylated 1       | 4580.0205 |
| 10049 | HG2261-HT2352_at_NA_illumina | Antigen, Prostate Specific, Alt. Splice Form | 4580.794  |
| 10050 | RC_AA291399_at_NA_illumina   | EST: zt38e03.s1 Soares ovary tumor           | 4582.047  |

|       |                                |                                              |           |
|-------|--------------------------------|----------------------------------------------|-----------|
| 10051 | AA479996_at_GI_15147334-S      | EST: zv18b06.r1 Soares NhHMPu S1             | 4582.1636 |
| 10052 | X74764_at_GI_5453813-S         | Receptor protein tyrosine kinase             | 4583.2905 |
| 10053 | RC_AA428293_at_GI_13129103-S   | Chemoattractant receptor-homologous          | 4584.432  |
| 10054 | H15365_at_NA_illumina          | EST: ym28b10.r1 Homo sapiens cDNA            | 4584.481  |
| 10055 | U78180_at-2_NA_illumina        | Human sodium channel 2 (hBNaC2)              | 4585.287  |
| 10056 | U78180_at_GI_21536348-A        | Sodium channel 2 (hBNaC2) mRNA,              | 4585.287  |
| 10057 | W26817_at_NA_illumina          | Homo sapiens ornithine decarboxylase         | 4585.6846 |
| 10058 | AA093480_at_NA_illumina        | EST: kk5557.seq.F Fetal heart, Lambda        | 4585.976  |
| 10059 | RC_AA401811_at_NA_illumina     | EST: zv65h10.s1 Soares total fetus           | 4586.451  |
| 10060 | AJ000480_at_NA_illumina        | C8FW phosphoprotein                          | 4586.455  |
| 10061 | RC_AA609785_at_GI_34486091-S   | EST: af17h08.s1 Soares testis NHT Homo       | 4587.0024 |
| 10062 | D84557_at_GI_33469920-S        | P105MCM mRNA                                 | 4590.3877 |
| 10063 | AB000895_at_NA_illumina        | Cadherin FIB1, partial cds                   | 4591.278  |
| 10064 | U47928_at_NA_illumina          | Protein A alternatively spliced form 2 (A-2) | 4591.3525 |
| 10065 | U47928_at-2_NA_illumina        | Human protein A alternatively spliced form   | 4591.3525 |
| 10066 | X51956_rna1_at_GI_16507966-S   | ENO2 gene for neuron specific (gamma)        | 4591.6675 |
| 10067 | U41315_rna1_s_at_NA_illumina   | Ring zinc-finger protein (ZNF127-Xp) gene    | 4592.4297 |
| 10068 | U41315_rna1_s_at-2_NA_illumina | Human ring zinc-finger protein (ZNF127-      | 4592.4297 |
| 10069 | AA044622_at_GI_34222277-S      | Human Chromosome 16 BAC clone                | 4596.3794 |
| 10070 | M97252_at-2_NA_illumina        | Kallmann syndrome 1 sequence                 | 4596.7056 |
| 10071 | M97252_at_GI_4557682-S         | KALLMANN SYNDROME PROTEIN                    | 4596.7056 |
| 10072 | W01426_at_GI_8922359-S         | Vaccinia related kinase 2                    | 4596.841  |
| 10073 | RC_AA609723_at_GI_37545936-S   | EST: af17b03.s1 Soares testis NHT Homo       | 4596.849  |
| 10074 | M77836_at_GI_24797094-A        | PYCR1 Pyrroline-5-carboxylate reductase      | 4597.382  |
| 10075 | AA095885_at_GI_4557646-S       | EST: l6748.seq.F Fetal heart, Lambda         | 4598.114  |
| 10076 | RC_AA451916_at_NA_illumina     | EST: aa85b12.s1 Stratagene fetal retina      | 4598.7275 |
| 10077 | RC_AA441792_at_GI_6912303-S    | EST: zw62c03.s1 Soares total fetus           | 4599.578  |
| 10078 | RC_AA400292_at_NA_illumina     | EST: zu63f03.s1 Soares testis NHT Homo       | 4599.6045 |
| 10079 | RC_AA449361_at_GI_34577092-A   | Homo sapiens RING zinc finger protein        | 4601.032  |
| 10080 | W88550_at_GI_24308028-S        | EST: zh73e05.r1 Soares fetal liver spleen    | 4601.063  |
| 10081 | D90150_rna1_s_at_NA_illumina   | Guanine nucleotide binding protein (G        | 4601.975  |
| 10082 | RC_AA430675_at_GI_4759335-S    | X-ray repair complementing defective         | 4603.517  |
| 10083 | X72475_at_NA_illumina          | GLUL Glutamate-ammonia ligase                | 4603.5312 |
| 10084 | D10040_at_GI_4503650-S         | FACL1 Long chain fatty acid acyl-coA         | 4603.7334 |
| 10085 | RC_AA004652_at_NA_illumina     | EST: zh92d07.s1 Soares fetal liver spleen    | 4606.8794 |
| 10086 | W93957_at_NA_illumina          | EST: zd98g05.r1 Soares fetal heart           | 4607.136  |
| 10087 | RC_AA224245_at_NA_illumina     | EST: zr14h04.s1 Stratagene hNT neuron        | 4607.836  |
| 10088 | RC_AA074514_at_GI_38505265-S   | EST: zm17f04.s1 Stratagene pancreas          | 4608.239  |
| 10089 | RC_AA521468_at_GI_38505202-S   | EST: aa69f08.s1 NCI_CGAP_GCB1 Homo           | 4608.41   |
| 10090 | RC_AA278816_f_at_GI_45120103-S | EST: zs78d05.s1 NCI_CGAP_GCB1                | 4611.328  |
| 10091 | AA442992_at_GI_14249513-S      | EST: zx75f11.r1 Soares ovary tumor           | 4611.637  |
| 10092 | U57316_at-2_NA_illumina        | Homo sapiens histone acetyltransferase       | 4611.856  |
| 10093 | U57316_at_GI_10835100-S        | GCN5 (hGCN5) gene                            | 4611.856  |

|       |                               |                                            |           |
|-------|-------------------------------|--------------------------------------------|-----------|
| 10094 | RC_AA242819_at_NA_illumina    | Phospholipase C, beta 4                    | 4612.3037 |
| 10095 | C00014_at_NA_illumina         | EST: HUMGS0002402, Human Gene              | 4612.3267 |
| 10096 | AA093128_at_NA_illumina       | EST: mm1735.seq.F Fetal heart, Lambda      | 4612.4585 |
| 10097 | M92357_at_GI_26051239-S       | B94 PROTEIN                                | 4614.569  |
| 10098 | M27160_at_GI_24475623-S       | TYR Tyrosinase (oculocutaneous albinism    | 4615.526  |
| 10099 | RC_AA262032_at_GI_30795219-S  | EST: zs21d03.s1 NCI_CGAP_GCB1              | 4615.656  |
| 10100 | H87433_at_NA_illumina         | EST: yw14h08.r1 Homo sapiens cDNA          | 4615.6665 |
| 10101 | RC_AA434113_at_GI_40316949-S  | EST: zw24b11.s1 Soares ovary tumor         | 4616.109  |
| 10102 | RC_AA419139_at_NA_illumina    | EST: zv34h05.s1 Soares ovary tumor         | 4616.145  |
| 10103 | X57206_at_GI_38569399-S       | ITPKB Inositol 1,4,5-trisphosphate 3-      | 4617.02   |
| 10104 | W95795_at_NA_illumina         | Homo sapiens incomplete cDNA for a         | 4617.0293 |
| 10105 | D83018_at_GI_5453765-S        | Nel-related protein 2                      | 4617.217  |
| 10106 | X59405_at_GI_27502404-A       | MCP Membrane cofactor protein (CD46,       | 4618.245  |
| 10107 | D14012_s_at_NA_illumina       | HGF activator                              | 4618.572  |
| 10108 | RC_AA419069_s_at_GI_29029528- | EST: zv34a11.s1 Soares ovary tumor         | 4618.77   |
| 10109 | X02530_at_GI_4504700-S        | INP10 Interferon (gamma)-induced cell      | 4618.8105 |
| 10110 | M24899_at_NA_illumina         | THRA Thyroid hormone receptor, alpha       | 4618.9614 |
| 10111 | AA417126_at_GI_6912707-S      | EST: zu13c10.r1 Soares testis NHT Homo     | 4620.969  |
| 10112 | AA349630_at_NA_illumina       | EST: EST56447 Infant brain Homo            | 4622.2803 |
| 10113 | L00058_at_GI_31543215-S       | MYC V-myc avian myelocytomatosis viral     | 4622.3037 |
| 10114 | T84339_at_NA_illumina         | EST: yd37c02.r1 Homo sapiens cDNA          | 4622.893  |
| 10115 | L35249_s_at_GI_19913427-S     | ATP6B2 ATPase, H+ transporting,            | 4624.0425 |
| 10116 | M27436_s_at_GI_10518499-S     | F3 Coagulation factor III (thromboplastin, | 4624.127  |
| 10117 | AA488230_at_GI_19923450-S     | EST: ad08c03.r1 Soares NbHFB Homo          | 4624.6133 |
| 10118 | X66839_at_GI_9955947-S        | MaTu MN mRNA for p54/58N protein           | 4625.195  |
| 10119 | X06956_at_GI_17921988-S       | TUBULIN ALPHA-4 CHAIN                      | 4625.7915 |
| 10120 | RC_AA521195_at_GI_38455384-S  | EST: aa74c01.s1 NCI_CGAP_GCB1              | 4625.8813 |
| 10121 | U02609_at_GI_19913368-S       | Transducin-like protein mRNA               | 4626.1167 |
| 10122 | R28109_f_at_NA_illumina       | EST: yh58c06.r1 Homo sapiens cDNA          | 4626.1226 |
| 10123 | M69181_at_GI_41406063-S       | Nonmuscle myosin heavy chain-B             | 4628.789  |
| 10124 | M33308_at_GI_7669551-A        | VCL Vinculin                               | 4629.5684 |
| 10125 | RC_AA465520_at_GI_24432029-S  | EST: aa32a10.s1 NCI_CGAP_GCB1              | 4630.6436 |
| 10126 | Y12711_at_GI_6857798-S        | Putative progesterone binding protein      | 4630.956  |
| 10127 | Y12711_at_2_NA_illumina       | H.sapiens mRNA for putative progesterone   | 4630.956  |
| 10128 | U54644_s_at_GI_29826278-A     | TUB Tubby (mouse) homolog                  | 4631.352  |
| 10129 | W26259_at_NA_illumina         | Forkhead (Drosophila) homolog              | 4631.4062 |
| 10130 | RC_AA460422_at_GI_31342242-S  | EST: zx66g09.s1 Soares total fetus         | 4632.227  |
| 10131 | X96484_at_GI_15208653-S       | DGCR6 protein                              | 4632.314  |
| 10132 | AA136360_at_GI_14971410-A     | EST: zk93c02.r1 Soares pregnant uterus     | 4632.4775 |
| 10133 | RC_AA258558_at_NA_illumina    | KIAA0644 gene product                      | 4633.3433 |
| 10134 | RC_AA053883_at_GI_16933560-S  | EST: ze75b02.s1 Soares fetal heart         | 4633.367  |
| 10135 | RC_AA485349_at_NA_illumina    | EST: zx90a05.s1 Soares ovary tumor         | 4633.432  |
| 10136 | M68864_at_GI_34147677-S       | ORF mRNA                                   | 4634.0874 |

|       |                                |                                               |           |
|-------|--------------------------------|-----------------------------------------------|-----------|
| 10137 | RC_AA084405_at_GI_31543933-S   | EST: zn06c11.s1 Stratagene hNT neuron         | 4634.0923 |
| 10138 | R53717_at_GI_21614506-A        | EST: yi02e03.r1 Homo sapiens cDNA             | 4634.378  |
| 10139 | RC_AA456147_at_NA_illumina     | General transcription factor IIIA             | 4635.153  |
| 10140 | Z23064_at_GI_4504450-S         | HNRPG Heterogeneous nuclear                   | 4635.264  |
| 10141 | RC_AA598975_at_NA_illumina     | EST: ae40c09.s1 Gessler Wilms tumor           | 4636.8345 |
| 10142 | AA324825_at_GI_34452729-A      | Homo sapiens polyadenylate binding            | 4638.0737 |
| 10143 | AB000115_at_NA_illumina        | mRNA                                          | 4638.1743 |
| 10144 | RC_AA278302_at_GI_21265077-S   | EST: zs80b08.s1 NCI_CGAP_GCB1                 | 4640.161  |
| 10145 | U50733_at_GI_34335254-S        | Dynamitin mRNA                                | 4640.679  |
| 10146 | K01160_s_at_GI_18426974-S      | HLA-DQA1 MHC class II DQ alpha                | 4640.758  |
| 10147 | RC_AA112413_at_GI_11968052-S   | EST: zn66f06.s1 Stratagene HeLa cell s3       | 4641.83   |
| 10148 | U17894_at_GI_4503806-S         | Alpha(1,2)fucosyltransferase                  | 4641.914  |
| 10149 | D55696_at_GI_21914880-S        | Cysteine protease                             | 4642.3037 |
| 10150 | N36619_at_NA_illumina          | EST: yx88c08.r1 Homo sapiens cDNA             | 4642.316  |
| 10151 | AA258972_at_NA_illumina        | EST: zs34d01.r1 NCI_CGAP_GCB1 Homo            | 4642.804  |
| 10152 | D56411_at_NA_illumina          | Human amino acid transport-related            | 4643.554  |
| 10153 | U94585_at_GI_21536317-S        | Requiem homolog (hsReq) mRNA                  | 4643.679  |
| 10154 | RC_AA621612_at_NA_illumina     | EST: af47h10.s1 Soares total fetus            | 4644.9355 |
| 10155 | W52706_at_GI_14042963-S        | EST: zc55g02.r1 Soares senescent              | 4645.1484 |
| 10156 | RC_AA401199_at_GI_22748936-S   | EST: zu52e12.s1 Soares ovary tumor            | 4646.015  |
| 10157 | HG4332-HT4602_at_NA_illumina   | Zinc Finger Protein Znfp1                     | 4646.7783 |
| 10158 | RC_AA429262_at_GI_21314710-S   | EST: zv50a08.s1 Soares ovary tumor            | 4649.8105 |
| 10159 | D21063_at_GI_33356546-S        | KIAA0030 gene, partial cds                    | 4650.1187 |
| 10160 | RC_AA195657_at_NA_illumina     | EST: zr33f06.s1 Soares NhHMPu S1              | 4651.0474 |
| 10161 | AB002361_at_NA_illumina        | Human mRNA for KIAA0363 gene, partial         | 4651.3    |
| 10162 | AA234141_s_at_GI_5031816-S     | Homo sapiens katanin p80 subunit mRNA,        | 4651.755  |
| 10163 | RC_AA478487_at_NA_illumina     | EST: zx16c03.s1 Soares total fetus            | 4651.756  |
| 10164 | W26839_at_NA_illumina          | EST: 15e4 Human retina cDNA randomly          | 4651.958  |
| 10165 | M64595_at_GI_27881480-S        | RAC2 Ras-related C3 botulinum toxin           | 4651.959  |
| 10166 | RC_AA012923_at_NA_illumina     | EST: ze27d01.s1 Soares retina N2b4HR          | 4653.0566 |
| 10167 | RC_AA449108_at_NA_illumina     | EST: zx08a06.s1 Soares total fetus            | 4654.4473 |
| 10168 | RC_AA256323_at_GI_19923618-S   | EST: zr80f05.s1 Soares NhHMPu S1              | 4654.761  |
| 10169 | RC_AA235962_at_NA_illumina     | EST: zs40h12.s1 Soares NhHMPu S1              | 4655.724  |
| 10170 | HG2809-HT2920_s_at_NA_illumina | Lung Surfactant Protein D                     | 4655.7373 |
| 10171 | AA406488_s_at_NA_illumina      | EST: zv12g03.r1 Soares NhHMPu S1              | 4656.551  |
| 10172 | RC_AA454157_at_GI_7705400-S    | EST: zx46f07.s1 Soares testis NHT Homo        | 4657.0713 |
| 10173 | X86779_at_GI_39995106-A        | FAST kinase                                   | 4657.137  |
| 10174 | W81020_at_GI_37552541-S        | Homo sapiens mRNA for KIAA0700                | 4657.315  |
| 10175 | R70621_at_NA_illumina          | Homo sapiens mRNA for KIAA0896                | 4657.3364 |
| 10176 | RC_AA457155_s_at_NA_illumina   | Human zinc-finger protein C2H2-150            | 4657.7817 |
| 10177 | RC_AA599991_at_NA_illumina     | EST: ag28h10.s1 Jia bone marrow stroma        | 4661.8267 |
| 10178 | X54868_s_at_NA_illumina        | Killer cell lectin-like receptor subfamily C, | 4661.942  |
| 10179 | S74039_s_at_NA_illumina        | Homo sapiens creatine transporter mRNA,       | 4662.064  |

|       |                              |                                            |           |
|-------|------------------------------|--------------------------------------------|-----------|
| 10180 | D30851_at_GI_32130534-S      | EST: Human fetal-lung cDNA 5'-end          | 4665.0215 |
| 10181 | RC_AA293796_at_GI_37544131-S | EST: zt56g08.s1 Soares ovary tumor         | 4665.104  |
| 10182 | RC_AA251003_at_NA_illumina   | EST: zs07g11.s1 NCI_CGAP_GCB1              | 4665.354  |
| 10183 | AA446137_at_GI_7705601-S     | EST: zw64a01.r1 Soares testis NHT Homo     | 4667.243  |
| 10184 | M95167_at_GI_38194225-S      | SLC6A3 Solute carrier family 6             | 4668.259  |
| 10185 | AA447410_s_at_NA_illumina    | EST: zw93c10.r1 Soares total fetus         | 4669.4136 |
| 10186 | U66674_at_GI_9955969-A       | Canicular multispecific organic anion      | 4670.119  |
| 10187 | N42440_at_GI_33620746-S      | EST: yy16a09.r1 Homo sapiens cDNA          | 4674.223  |
| 10188 | AA247569_at_GI_22547133-S    | EST: csg3817.seq.F Human fetal heart,      | 4675.3413 |
| 10189 | RC_AA464853_at_GI_34147385-S | EST: zx44h02.s1 Soares total fetus         | 4676.008  |
| 10190 | D16583_at_GI_4504364-S       | HDC Histidine decarboxylase                | 4676.7803 |
| 10191 | AA114949_at_GI_34147515-S    | UDP-N-acteylglucosamine                    | 4677.8447 |
| 10192 | RC_AA412063_at_NA_illumina   | EST: zu10b08.s1 Soares testis NHT Homo     | 4678.733  |
| 10193 | AA078862_s_at_NA_illumina    | EST: zm92d02.r1 Stratagene ovarian         | 4678.969  |
| 10194 | R20031_at_GI_42544150-S      | EST: yg31g03.r1 Homo sapiens cDNA          | 4679.052  |
| 10195 | M34338_s_at_GI_4507208-S     | SRM Spermidine synthase                    | 4679.254  |
| 10196 | N79660_at_NA_illumina        | EST: yz81f06.r1 Homo sapiens cDNA          | 4679.3643 |
| 10197 | AA120807_f_at_NA_illumina    | Zm23h06.r1 Stratagene pancreas             | 4680.2275 |
| 10198 | U79265_at-2_NA_illumina      | Human clone 23614 mRNA sequence            | 4680.771  |
| 10199 | U79265_at_GI_34916011-S      | Clone 23614 mRNA sequence                  | 4680.771  |
| 10200 | RC_AA224324_at_GI_38569393-S | EST: zr12e05.s1 Stratagene hNT neuron      | 4681.9106 |
| 10201 | M65066_at_GI_38257138-S      | PRKAR1B Protein kinase, cAMP-              | 4682.249  |
| 10202 | RC_AA447641_at_GI_38044289-S | EST: zw97e06.s1 Soares total fetus         | 4683.1855 |
| 10203 | U06641_s_at_NA_illumina      | UDP glycosyltransferase 2 family,          | 4689.965  |
| 10204 | RC_AA621776_at_NA_illumina   | Homo sapiens mRNA for KIAA0896             | 4690.284  |
| 10205 | R63993_at_NA_illumina        | EST: yi19b06.r1 Homo sapiens cDNA          | 4690.936  |
| 10206 | T54762_s_at_NA_illumina      | EST: yb41h09.r1 Homo sapiens cDNA          | 4691.302  |
| 10207 | RC_AA449813_at_NA_illumina   | EST: zx37a03.s1 Soares total fetus         | 4691.391  |
| 10208 | RC_AA482585_at_NA_illumina   | EST: zu98a10.s1 NCI_CGAP_GCB1              | 4693.766  |
| 10209 | RC_AA482107_s_at_NA_illumina | EST: zv42h10.s1 Soares ovary tumor         | 4696.6934 |
| 10210 | RC_AA253313_at_GI_31377724-S | EST: zr77a02.s1 Soares NhHMPu S1           | 4696.887  |
| 10211 | RC_AA504648_at_NA_illumina   | EST: aa63f03.s1 NCI_CGAP_GCB1 Homo         | 4697.431  |
| 10212 | RC_AA287382_at_GI_19923843-S | EST: zs50c10.s1 NCI_CGAP_GCB1              | 4698.112  |
| 10213 | RC_AA441823_at_GI_7661785-S  | EST: zw62f07.s1 Soares total fetus         | 4698.769  |
| 10214 | RC_AA482077_at_GI_14249149-S | EST: zv43d08.s1 Soares ovary tumor         | 4698.825  |
| 10215 | RC_AA491287_at_NA_illumina   | EST: aa53c03.s1 NCI_CGAP_GCB1              | 4698.837  |
| 10216 | U78190_rna1_at_GI_6382072-S  | GTP cyclohydrolase I feedback regulatory   | 4699.336  |
| 10217 | RC_AA292711_at_NA_illumina   | EST: zs59d11.s1 NCI_CGAP_GCB1              | 4700.4404 |
| 10218 | U70671_at_NA_illumina        | Ataxin-2 related protein mRNA, partial cds | 4700.6646 |
| 10219 | AA131127_at_GI_22538441-S    | Cathepsin Z                                | 4701.346  |
| 10220 | U17163_at-2_NA_illumina      | Ets variant gene 1                         | 4702.7544 |
| 10221 | U17163_at_GI_31742533-S      | Transcription factor ETV1 mRNA             | 4702.7544 |
| 10222 | RC_AA404385_at_NA_illumina   | EST: zw37a09.s1 Soares total fetus         | 4703.7407 |

|       |                                |                                             |           |
|-------|--------------------------------|---------------------------------------------|-----------|
| 10223 | RC_AA446949_at_NA_illumina     | EST: zw85d05.s1 Soares total fetus          | 4704.3047 |
| 10224 | AB000468_at_GI_34305289-S      | Zinc finger protein, clone RES4-26          | 4705.8223 |
| 10225 | AA504692_at_NA_illumina        | EST: ab02e07.r1 Stratagene fetal retina     | 4706.082  |
| 10226 | RC_AA443993_at_GI_19923616-S   | EST: zv44b09.s1 Soares ovary tumor          | 4706.446  |
| 10227 | T59929_s_at_NA_illumina        | EST: yb67d11.r1 Homo sapiens cDNA           | 4707.127  |
| 10228 | RC_AA424592_at_NA_illumina     | EST: zv91h10.s1 Soares NhHMPu S1            | 4709.5366 |
| 10229 | RC_AA445994_at_NA_illumina     | EST: zw64e04.s1 Soares testis NHT           | 4709.5884 |
| 10230 | D62504_s_at_NA_illumina        | EST: Human aorta cDNA 5'-end GEN-           | 4710.4424 |
| 10231 | AA322495_at_NA_illumina        | EST25135 Cerebellum II Homo sapiens         | 4710.7827 |
| 10232 | RC_AA282521_at_NA_illumina     | Platelet-activating factor acetylhydrolase, | 4710.959  |
| 10233 | RC_AA621634_at_GI_17511204-S   | EST: af48c08.s1 Soares total fetus          | 4713.054  |
| 10234 | X61587_at_NA_illumina          | ARHG Ras homolog gene family, member        | 4713.289  |
| 10235 | RC_AA224351_f_at_GI_38570154-S | EST: zr12f12.s1 Stratagene hNT neuron       | 4714.435  |
| 10236 | R87834_at_NA_illumina          | Homo sapiens okadaic acid-inducible         | 4715.058  |
| 10237 | X72841_at_GI_13259504-S        | Retinoblastoma-binding protein (RbAp46)     | 4715.6113 |
| 10238 | AA482453_at_GI_31563365-A      | EST: zv05b12.r1 Soares NhHMPu S1            | 4717.3047 |
| 10239 | RC_AA236485_at_NA_illumina     | Homo sapiens mRNA for KIAA0829              | 4717.5063 |
| 10240 | RC_AA621390_at_GI_40316934-S   | EST: af32b12.s1 Soares total fetus          | 4718.008  |
| 10241 | RC_AA262030_at_GI_34222120-S   | EST: zs21d01.s1 NCI_CGAP_GCB1               | 4718.019  |
| 10242 | X97748_s_at_NA_illumina        | PTX3 gene promotor region                   | 4718.913  |
| 10243 | RC_AA211909_at_GI_14249635-S   | EST: zq85a03.s1 Stratagene hNT neuron       | 4720.217  |
| 10244 | RC_AA416893_s_at_NA_illumina   | EST: zt94f08.s1 Soares testis NHT Homo      | 4721.855  |
| 10245 | RC_AA431502_at_GI_5174700-S    | Homo sapiens lok mRNA for protein           | 4722.69   |
| 10246 | AA100219_at_NA_illumina        | EST: zm65g09.r1 Stratagene fibroblast       | 4724.1665 |
| 10247 | RC_AA282571_at_NA_illumina     | FSHD region gene 1                          | 4724.5615 |
| 10248 | RC_AA137034_at_NA_illumina     | EST: zl02c01.s1 Soares pregnant uterus      | 4724.9575 |
| 10249 | HG511-HT511_at_NA_illumina     | Ras Inhibitor Inf                           | 4725.036  |
| 10250 | RC_AA070108_at_NA_illumina     | EST: zm69d06.s1 Stratagene                  | 4725.3286 |
| 10251 | RC_AA436656_at_GI_21362065-S   | EST: zv57c04.s1 Soares testis NHT Homo      | 4728.253  |
| 10252 | M16591_s_at_GI_30795228-S      | HCK Hemopoietic cell kinase                 | 4728.496  |
| 10253 | M16591_s_at-2_NA_illumina      | Hemopoietic cell kinase                     | 4728.496  |
| 10254 | RC_AA599144_at_NA_illumina     | Myosin phosphatase, target subunit 1        | 4729.3857 |
| 10255 | RC_AA608545_at_GI_34147481-S   | EST: ae53d05.s1 Stratagene lung             | 4730.403  |
| 10256 | RC_AA205168_at_NA_illumina     | EST: zq78b09.s1 Stratagene hNT neuron       | 4730.9976 |
| 10257 | U50822_rna1_s_at_NA_illumina   | Neurogenic helix-loop-helix protein         | 4732.2153 |
| 10258 | RC_AA233841_at_GI_8923449-S    | EST: zr49a12.s1 Soares NhHMPu S1            | 4733.1396 |
| 10259 | U27325_s_at_NA_illumina        | TBXA2R Thromboxane A2 receptor              | 4733.56   |
| 10260 | RC_AA443342_s_at_NA_illumina   | EST: zw94h05.s1 Soares total fetus          | 4733.939  |
| 10261 | RC_AA234442_at_GI_21361723-S   | EST: zr74f05.s1 Soares NhHMPu S1            | 4734.638  |
| 10262 | W00405_at_NA_illumina          | Apg12 (autophagy, yeast) homolog            | 4734.9634 |
| 10263 | J00073_at_GI_10938011-S        | Alpha-cardiac actin gene, 5' flank and      | 4735.07   |
| 10264 | D82419_at_GI_15277420-A        | EST: similar to none, mRNA sequence.        | 4735.48   |
| 10265 | RC_AA126311_at_NA_illumina     | EST: zm79b06.s1 Stratagene                  | 4735.778  |

|       |                               |                                           |           |
|-------|-------------------------------|-------------------------------------------|-----------|
| 10266 | AA310967_s_at_GI_27436902-S   | EST: EST181741 Jurkat T-cells V Homo      | 4735.785  |
| 10267 | W95746_at_GI_27734800-S       | EST: ze07c05.r1 Soares fetal heart        | 4736.408  |
| 10268 | RC_AA447729_s_at_GI_21361089- | EST: aa18e03.s1 Soares NhHMPu S1          | 4737.55   |
| 10269 | RC_AA465370_at_NA_illumina    | EST: aa23d12.s1 NCI_CGAP_GCB1             | 4738.2944 |
| 10270 | RC_AA481525_at_NA_illumina    | Homo sapiens clone 23938 mRNA             | 4738.6274 |
| 10271 | AA292122_at_NA_illumina       | EST: zt46f03.r1 Soares ovary tumor        | 4741.007  |
| 10272 | RC_AA242826_at_GI_5174616-S   | EST: zr65f09.s1 Soares NhHMPu S1          | 4741.6807 |
| 10273 | T08879_at_NA_illumina         | Cathepsin F                               | 4742.962  |
| 10274 | X99802_at-2_NA_illumina       | H.sapiens mRNA for ZYG homologue          | 4744.041  |
| 10275 | X99802_at_NA_illumina         | ZYG homologue                             | 4744.041  |
| 10276 | AA081209_at_GI_41387215-S     | Regulator of G-protein signalling 5       | 4744.417  |
| 10277 | X77794_at_GI_40805830-S       | Cyclin G1 mRNA                            | 4747.7646 |
| 10278 | RC_AA256606_at_GI_31543618-S  | EST: zr86g04.s1 Soares NhHMPu S1          | 4748.1626 |
| 10279 | W02253_at_GI_37547077-S       | EST: za57f05.r1 Soares fetal liver spleen | 4748.976  |
| 10280 | RC_AA205947_at_GI_40255014-S  | EST: zq77b01.s1 Stratagene hNT neuron     | 4749.5264 |
| 10281 | RC_AA449984_at_NA_illumina    | Protein kinase mitogen-activated 9 (MAP   | 4749.8945 |
| 10282 | AA313880_at_NA_illumina       | EST185737 Colon carcinoma (HCC) cell      | 4750.128  |
| 10283 | U19145_s_at_NA_illumina       | G antigen 4                               | 4751.2036 |
| 10284 | RC_AA598930_at_GI_22325361-A  | EST: ae37e06.s1 Gessler Wilms tumor       | 4751.52   |
| 10285 | AA459555_at_NA_illumina       | Homo sapiens mRNA for KIAA0648            | 4751.642  |
| 10286 | X57348_s_at_GI_45238846-S     | SFN Stratifin                             | 4755.6226 |
| 10287 | RC_AA426220_at_GI_37543288-S  | Homo sapiens mRNA for KIAA0523            | 4755.6816 |
| 10288 | RC_AA251909_at_GI_20149508-S  | Budding uninhibited by benzimidazoles 1   | 4756.417  |
| 10289 | RC_AA431320_at_GI_42659002-S  | EST: zw70d12.s1 Soares testis NHT         | 4756.5615 |
| 10290 | RC_AA233620_at_GI_13540532-S  | EST: zr43d08.s1 Soares NhHMPu S1          | 4757.2866 |
| 10291 | RC_AA504324_at_NA_illumina    | EST: aa61e03.s1 NCI_CGAP_GCB1             | 4758.275  |
| 10292 | U07550_at_GI_4504522-S        | HSPE1 Heat shock 10 kD protein 1          | 4760.3228 |
| 10293 | D38251_s_at_GI_14589950-S     | DNA-DIRECTED RNA POLYMERASE II            | 4761.809  |
| 10294 | J03460_s_at_GI_4505820-S      | Prolactin-induced protein                 | 4763.231  |
| 10295 | RC_AA243692_at_NA_illumina    | EST: zr68e05.s1 Soares NhHMPu S1          | 4765.429  |
| 10296 | RC_AA489636_at_NA_illumina    | EST: aa43c05.s1 Soares NhHMPu S1          | 4767.8647 |
| 10297 | HG3521-HT3715_at_NA_illumina  | Ras-Related Protein Rap1b                 | 4768.0776 |
| 10298 | X69910_at_GI_19920316-S       | P63 mRNA for transmembrane protein        | 4768.672  |
| 10299 | U95822_at_GI_45269138-A       | Human putative transmembrane GTPase       | 4770.289  |
| 10300 | H20906_at_GI_39930348-S       | Homo sapiens mRNA for KIAA0746            | 4771.6943 |
| 10301 | U47742_at_GI_5803097-S        | Monocytic leukaemia zinc finger protein   | 4772.336  |
| 10302 | M60922_at_GI_4758393-S        | Surface antigen mRNA                      | 4773.0156 |
| 10303 | W69967_at_NA_illumina         | EST: zd52f01.r1 Soares fetal heart        | 4773.509  |
| 10304 | U90552_s_at_NA_illumina       | Butyrophilin (BTF5) mRNA                  | 4773.565  |
| 10305 | X13810_s_at_NA_illumina       | POU2F2 POU domain, class 2,               | 4776.5083 |
| 10306 | J02947_s_at_GI_4507150-S      | SOD3 Superoxide dismutase 3,              | 4777.7515 |
| 10307 | RC_AA100026_at_GI_29893546-A  | EST: zl79c09.s1 Stratagene colon          | 4778.101  |
| 10308 | U07664_at_GI_38348182-S       | HB9 homeobox gene                         | 4778.202  |



|       |                               |                                          |           |
|-------|-------------------------------|------------------------------------------|-----------|
| 10309 | RC_AA412251_at_GI_4502248-S   | EST: zu10a07.s1 Soares testis NHT Homo   | 4778.714  |
| 10310 | RC_AA032250_at_GI_24432057-S  | EST: zk19f06.s1 Soares pregnant uterus   | 4778.9805 |
| 10311 | AA477567_at_NA_illumina       | Discs, large (Drosophila) homolog 3      | 4780.669  |
| 10312 | HG620-HT620_at_NA_illumina    | Tyrosine Phosphatase, Epsilon            | 4781.0576 |
| 10313 | D51895_at_NA_illumina         | Homo sapiens surf5c mRNA, clone 10.9     | 4781.6743 |
| 10314 | RC_AA436445_at_GI_38348732-A  | EST: zv08a03.s1 Soares NhHMPu S1         | 4783.623  |
| 10315 | X04741_at_GI_34147658-S       | UBIQUITIN CARBOXYL-TERMINAL              | 4785.2046 |
| 10316 | D57737_at_NA_illumina         | EST: Human aorta cDNA 5'-end GEN-        | 4785.8887 |
| 10317 | D79601_i_at_NA_illumina       | EST: Human aorta cDNA 5'-end GEN-        | 4787.7134 |
| 10318 | W47082_at_NA_illumina         | EST: zc43d05.r1 Soares senescent         | 4791.0405 |
| 10319 | RC_AA452263_at_NA_illumina    | Potassium inwardly-rectifying            | 4792.905  |
| 10320 | W42944_at_NA_illumina         | EST: zc25a10.r1 Soares senescent         | 4793.006  |
| 10321 | U78294_at_GI_4557308-S        | Arachidonate 15-lipoxygenase, second     | 4794.5454 |
| 10322 | L19267_at_NA_illumina         | 59 protein mRNA, 3' end                  | 4794.7446 |
| 10323 | M15205_at_GI_4507518-S        | TK1 Thymidine kinase 1, soluble          | 4796.7246 |
| 10324 | RC_AA279949_at_NA_illumina    | Human Chromosome 16 BAC clone            | 4800.052  |
| 10325 | D80002_at-2_NA_illumina       | Human mRNA for KIAA0180 gene, partial    | 4800.3545 |
| 10326 | D80002_at_GI_27436890-A       | KIAA0180 gene, partial cds               | 4800.3545 |
| 10327 | AA287706_at_GI_40807455-S     | EST: zs53g08.r1 NCI_CGAP_GCB1 Homo       | 4800.9985 |
| 10328 | W56046_at_NA_illumina         | Homo sapiens mRNA for KIAA0746           | 4801.2954 |
| 10329 | RC_AA279929_at_GI_14150228-S  | EST: zs92g02.s1 NCI_CGAP_GCB1            | 4803.1665 |
| 10330 | RC_AA279157_s_at_GI_24475891- | Human chromosome-associated              | 4803.8745 |
| 10331 | D16105_at_GI_42544152-S       | LTK Leukocyte tyrosine kinase            | 4804.355  |
| 10332 | RC_AA382174_at_NA_illumina    | EST: EST95340 Activated T-cells II Homo  | 4806.1587 |
| 10333 | X14684_s_at_GI_31543654-S     | SSB Sjogren syndrome antigen B           | 4807.3076 |
| 10334 | RC_AA436244_at_NA_illumina    | EST: zv24g01.s1 Soares NhHMPu S1         | 4807.56   |
| 10335 | X57147_s_at_NA_illumina       | Human endogenous retrovirus pHE.1        | 4809.046  |
| 10336 | M57399_at_GI_42476152-S       | PTN Pleiotrophin (heparin binding growth | 4810.121  |
| 10337 | S78187_at_GI_11641410-A       | M-PHASE INDUCER PHOSPHATASE 2            | 4810.483  |
| 10338 | AA126592_at_GI_7662449-S      | EST: zl17g05.r1 Soares pregnant uterus   | 4812.186  |
| 10339 | RC_AA400229_at_GI_23097314-S  | EST: zu69a09.s1 Soares testis NHT Homo   | 4818.9966 |
| 10340 | S72422_s_at_NA_illumina       | E2k                                      | 4819.923  |
| 10341 | U39317_at_GI_33188457-A       | E2 ubiquitin conjugating enzyme UbcH5B   | 4819.9785 |
| 10342 | RC_AA047279_at_GI_29733255-S  | EST: zk74e02.s1 Soares pregnant uterus   | 4822.4233 |
| 10343 | N76303_at_GI_4827043-S        | Thyroid hormone receptor-associated      | 4825.8115 |
| 10344 | Y00796_at_GI_4504756-S        | ITGAL Integrin, alpha L (antigen CD11A   | 4826.2354 |
| 10345 | RC_AA417820_s_at_NA_illumina  | EST: zv05b11.s1 Soares NhHMPu S1         | 4826.461  |
| 10346 | RC_AA431303_at_GI_11545750-S  | EST: zw70c03.s1 Soares testis NHT        | 4826.686  |
| 10347 | AA135328_s_at_GI_23238250-S   | EST: zo28e08.r1 Stratagene colon         | 4827.5796 |
| 10348 | X14787_at-2_NA_illumina       | Thrombospondin 1                         | 4827.585  |
| 10349 | X14787_at_NA_illumina         | THBS1 Thrombospondin 1                   | 4827.585  |
| 10350 | M26602_at_GI_12621915-S       | DEFA1 Defensin, alpha 1, myeloid-related | 4828.689  |
| 10351 | RC_AA233170_at_NA_illumina    | Interleukin 13 receptor, alpha 1         | 4829.403  |

|       |                                |                                             |           |
|-------|--------------------------------|---------------------------------------------|-----------|
| 10352 | U72661_at_GI_31543289-S        | Ninjurin1 mRNA                              | 4830.922  |
| 10353 | HG1763-HT1780_s_at_NA_illumina | Prolactin-Induced Protein                   | 4830.9507 |
| 10354 | RC_AA447110_at_GI_4557448-S    | EST: zw91d01.s1 Soares total fetus          | 4831.5957 |
| 10355 | U02687_at_GI_4758395-S         | Growth factor receptor tyrosine kinase      | 4832.469  |
| 10356 | W27069_at_NA_illumina          | Ribosomal protein L10                       | 4832.6855 |
| 10357 | U66879_at_GI_14670387-A        | Bcl-2 binding component 6 (bbc6) mRNA       | 4833.7705 |
| 10358 | RC_AA599898_at_GI_7657008-S    | Deleted in bladder cancer chromosome        | 4835.2563 |
| 10359 | RC_AA455087_at_NA_illumina     | EST: aa04e08.s1 Soares NhHMPu S1            | 4836.857  |
| 10360 | N24994_at_GI_41281526-S        | KIAA0710 gene product                       | 4837.9805 |
| 10361 | AA095119_at_NA_illumina        | Homo sapiens clone 23967 unknown            | 4840.3447 |
| 10362 | RC_AA460350_at_NA_illumina     | EST: zx62e04.s1 Soares total fetus          | 4842.254  |
| 10363 | X63422_at_GI_34222293-S        | ATP5D ATP synthase, H+ transporting,        | 4842.3716 |
| 10364 | X63422_at-2_NA_illumina        | ATP synthase, H+ transporting,              | 4842.3716 |
| 10365 | RC_AA609540_at_NA_illumina     | EST: af14h01.s1 Soares testis NHT Homo      | 4842.428  |
| 10366 | AA233231_at_GI_33620748-S      | EST: zr69c12.r1 Soares NhHMPu S1            | 4842.499  |
| 10367 | AA093050_at_GI_37551783-S      | EST: m1583.seq.F Fetal heart, Lambda        | 4844.5386 |
| 10368 | L16883_s_at_NA_illumina        | Homo sapiens cytochrome P4502C9             | 4845.485  |
| 10369 | AA400643_s_at_NA_illumina      | H.sapiens mRNA for GAR22 protein            | 4846.571  |
| 10370 | AF000562_at_GI_5803214-S       | Uroplakin II mRNA, partial cds              | 4846.8813 |
| 10371 | U59321_at_GI_38201711-A        | DEAD-box protein p72 (P72) mRNA             | 4847.967  |
| 10372 | U90550_at-2_NA_illumina        | Human butyrophilin (BTF2) mRNA,             | 4848.25   |
| 10373 | U90550_at_GI_31881692-A        | Butyrophilin (BTF2) mRNA                    | 4848.25   |
| 10374 | AA258286_at_NA_illumina        | Homo sapiens mRNA for KIAA0877              | 4849.237  |
| 10375 | RC_AA171546_at_GI_13470087-S   | EST: zp22d10.s1 Stratagene                  | 4850.7764 |
| 10376 | L42611_f_at_GI_31343353-S      | KERATIN, TYPE II CYTOSKELETAL 6D            | 4850.891  |
| 10377 | RC_AA398596_at_NA_illumina     | EST: zt70a05.s1 Soares testis NHT Homo      | 4852.5674 |
| 10378 | W48808_s_at_NA_illumina        | EST: zc44h06.r1 Soares senescent            | 4852.853  |
| 10379 | RC_AA292930_at_NA_illumina     | Homo sapiens mRNA for KIAA0692              | 4853.2715 |
| 10380 | L19161_at_GI_21314612-S        | Translation initiation factor eIF-2 gamma   | 4853.535  |
| 10381 | L19161_at-2_NA_illumina        | Eukaryotic translation initiation factor 2, | 4853.535  |
| 10382 | M62486_at_GI_21359850-S        | C4BPA Complement component 4-binding        | 4854.882  |
| 10383 | D88154_at_GI_7706762-S         | Homo sapiens mRNA for villin-like protein,  | 4855.0156 |
| 10384 | RC_AA035630_at_GI_34222192-S   | PRP4/STK/WD splicing factor                 | 4855.24   |
| 10385 | W07430_at_GI_38788229-S        | EST: za96f10.r1 Soares fetal lung           | 4857.1743 |
| 10386 | W52490_at_NA_illumina          | EST: zc54a02.r1 Soares senescent            | 4857.262  |
| 10387 | HG2259-HT2348_s_at_NA_illumina | Tubulin, Alpha 1, Isoform 44                | 4857.7573 |
| 10388 | T89243_s_at_NA_illumina        | EST: ye12g04.r1 Homo sapiens cDNA           | 4857.8022 |
| 10389 | RC_AA158162_at_NA_illumina     | EST: zo55h11.s1 Stratagene pancreas         | 4857.8647 |
| 10390 | U45448_s_at_GI_27894283-S      | P2x1 receptor mRNA                          | 4858.039  |
| 10391 | RC_AA482014_at_GI_4757975-S    | Centrin, EF-hand protein, 3 (CDC31 yeast    | 4859.3193 |
| 10392 | X60673_rna1_at_GI_19923436-S   | AK3 mRNA for adenylate kinase 3             | 4860.2812 |
| 10393 | D49728_at_GI_27894345-A        | NAK1 mRNA for DNA binding protein           | 4860.5293 |
| 10394 | RC_AA425636_at_GI_25777651-S   | Potassium intermediate/small conductance    | 4860.9297 |

|       |                               |                                               |           |
|-------|-------------------------------|-----------------------------------------------|-----------|
| 10395 | RC_AA490479_at_NA_illumina    | EST: aa45c11.s1 Soares NhHMPu S1              | 4861.713  |
| 10396 | RC_AA156532_at_GI_24497623-S  | Homo sapiens interferon regulatory factor     | 4862.0312 |
| 10397 | RC_AA598460_s_at_GI_17572813- | EST: ae48g12.s1 Stratagene lung               | 4862.642  |
| 10398 | RC_AA024622_at_GI_24497491-S  | Solute carrier family 22 (organic cation      | 4863.351  |
| 10399 | L34059_at-2_NA_illumina       | Cadherin 4, R-cadherin (retinal)              | 4866.214  |
| 10400 | L34059_at_GI_14589892-S       | CDH4 Cadherin 4                               | 4866.214  |
| 10401 | RC_AA436473_s_at_GI_31542500- | EST: zv08e08.s1 Soares NhHMPu S1              | 4866.9146 |
| 10402 | X86691_at_GI_4557452-S        | 218kD Mi-2 protein                            | 4867.34   |
| 10403 | RC_AA040157_at_GI_28411949-A  | EST: zk47b04.s1 Soares pregnant uterus        | 4867.35   |
| 10404 | AB002409_at_GI_22165425-S     | SLC                                           | 4867.698  |
| 10405 | HG4058-HT4328_at_NA_illumina  | Oncogene Aml1-Evi-1, Fusion Activated         | 4867.9272 |
| 10406 | R20358_at_GI_25777611-S       | Proteasome (prosome, macropain) 26S           | 4869.566  |
| 10407 | RC_AA159025_at_GI_34147669-S  | EST: zo57h03.s1 Stratagene pancreas           | 4870.0703 |
| 10408 | M62402_at_GI_11321592-S       | IGFBP6 Insulin-like growth factor binding     | 4870.4897 |
| 10409 | RC_AA284809_at_NA_illumina    | EST: zt24d08.s1 Soares ovary tumor            | 4873.631  |
| 10410 | C16329_at_GI_33519468-A       | NADH dehydrogenase (ubiquinone) 1 beta        | 4873.818  |
| 10411 | RC_AA599104_at_GI_21361930-S  | EST: ae51h02.s1 Stratagene lung               | 4874.4697 |
| 10412 | U00921_at_NA_illumina         | LST1 mRNA, cLST1/E splice variant             | 4874.5947 |
| 10413 | RC_AA504507_at_GI_37595536-A  | EST: aa60g07.s1 NCI_CGAP_GCB1                 | 4874.6    |
| 10414 | M60784_s_at_GI_39725715-S     | U1 SMALL NUCLEAR                              | 4876.713  |
| 10415 | AA216032_at_GI_5031710-S      | Homo sapiens GC20 protein mRNA,               | 4876.7827 |
| 10416 | RC_AA412481_s_at_NA_illumina  | EST: zt97g12.s1 Soares testis NHT Homo        | 4878.1367 |
| 10417 | RC_AA411796_at_GI_27886565-A  | Homo sapiens clone 24631 mRNA                 | 4879.441  |
| 10418 | AA461282_s_at_GI_34098936-S   | Dihydropyrimidinase-like 2                    | 4880.1606 |
| 10419 | AA397841_at_GI_33946276-A     | Cofilin 2 (muscle)                            | 4880.789  |
| 10420 | RC_AA032005_at_GI_19923825-S  | Human Chromosome 16 BAC clone                 | 4881.695  |
| 10421 | RC_AA461476_at_GI_9506930-S   | EST: zx68g01.s1 Soares total fetus            | 4882.0986 |
| 10422 | M12712_s_at_NA_illumina       | Protein C (inactivator of coagulation factors | 4882.317  |
| 10423 | RC_AA448644_at_GI_21450851-A  | EST: zx10c06.s1 Soares total fetus            | 4882.4834 |
| 10424 | RC_AA218982_at_GI_19923567-S  | EST: zr01e06.s1 Stratagene NT2 neuronal       | 4883.994  |
| 10425 | U95018_at_NA_illumina         | Cysteine and glycine-rich protein 2 (LIM      | 4886.469  |
| 10426 | RC_AA256317_at_NA_illumina    | EST: zr80e09.s1 Soares NhHMPu S1              | 4887.2993 |
| 10427 | RC_AA226768_at_GI_13376428-S  | EST: zr21b12.s1 Stratagene NT2 neuronal       | 4888.228  |
| 10428 | RC_AA262505_at_NA_illumina    | EST: zs22a10.s1 NCI_CGAP_GCB1                 | 4888.319  |
| 10429 | D57622_at_GI_4506782-S        | SIN3-associated polypeptide, 30-kD            | 4890.437  |
| 10430 | RC_AA427925_s_at_GI_7705329-S | EST: zw50e01.s1 Soares total fetus            | 4892.1763 |
| 10431 | AA479521_s_at_NA_illumina     | EST: zv21g11.r1 Soares NhHMPu S1              | 4892.8794 |
| 10432 | RC_AA063618_at_NA_illumina    | EST: ze87g04.s1 Soares fetal heart            | 4893.5117 |
| 10433 | R32266_at_NA_illumina         | Human transformer-2 alpha (htra-2 alpha)      | 4895.2793 |
| 10434 | U79260_at_GI_37541493-S       | Clone 23745 mRNA                              | 4895.626  |
| 10435 | RC_AA291710_at_NA_illumina    | EST: zt45a01.s1 Soares ovary tumor            | 4896.0015 |
| 10436 | RC_AA007194_at_NA_illumina    | EST: 13cDNA71-3.seq Soares infant brain       | 4896.266  |
| 10437 | AA249434_at_NA_illumina       | EST: j3922.seq.F Human fetal heart,           | 4898.723  |

|       |                               |                                             |           |
|-------|-------------------------------|---------------------------------------------|-----------|
| 10438 | W40513_at_NA_illumina         | Potassium channel, subfamily K, member      | 4899.1323 |
| 10439 | RC_AA620355_at_NA_illumina    | EST: af07d01.s1 Soares testis NHT Homo      | 4899.2744 |
| 10440 | RC_AA421139_at_NA_illumina    | EST: zt79c09.s1 Soares testis NHT Homo      | 4899.4004 |
| 10441 | RC_AA256067_at_GI_26986531-A  | EST: zs29e03.s1 NCI_CGAP_GCB1               | 4900.106  |
| 10442 | U65402_at_GI_4885316-S        | Seven transmembrane G-coupled receptor      | 4901.191  |
| 10443 | RC_AA292066_i_at_NA_illumina  | EST: zt46c11.s1 Soares ovary tumor          | 4901.6772 |
| 10444 | Z22951_rna1_s_at_NA_illumina  | Of p65 gene encoding p65 subunit of         | 4901.696  |
| 10445 | M96859_at_GI_18765695-A       | DPP6 Dipeptidylpeptidase VI                 | 4902.289  |
| 10446 | X70476_at_GI_4758031-S        | COATOMER BETA' SUBUNIT                      | 4906.234  |
| 10447 | AA220239_at_NA_illumina       | Mouse tropomyosin homolog                   | 4906.6064 |
| 10448 | U09366_at_GI_40807453-S       | ZNF133 Zinc finger protein 133 (clone pHZ-  | 4907.2104 |
| 10449 | U09366_at-2_NA_illumina       | Zinc finger protein 133 (clone pHZ-13)      | 4907.2104 |
| 10450 | RC_AA234945_at_NA_illumina    | EST: zr78h09.s1 Soares NhHMPu S1            | 4907.7773 |
| 10451 | Z84497_s_at_NA_illumina       | RING3 PROTEIN                               | 4909.581  |
| 10452 | S78296_at_GI_39725658-S       | Neurofilament-66 [human, fetal brain,       | 4910.4346 |
| 10453 | RC_AA227513_at_NA_illumina    | EST: zr18d09.s1 Stratagene NT2 neuronal     | 4910.981  |
| 10454 | RC_AA287908_at_GI_8922664-S   | EST: zs55a11.s1 NCI_CGAP_GCB1               | 4911.197  |
| 10455 | M16594_at_GI_22202620-S       | GSTA1 Glutathione S-transferase A2          | 4913.167  |
| 10456 | U47931_at_NA_illumina         | G-protein beta-3 subunit alternatively      | 4914.1084 |
| 10457 | RC_AA399663_s_at_GI_19923612- | EST: zt86c04.s1 Soares testis NHT Homo      | 4916.1987 |
| 10458 | AA089853_at_GI_37542183-S     | Homo sapiens antigen NY-CO-7 (NY-CO-        | 4917.5166 |
| 10459 | RC_AA448655_at_NA_illumina    | H.sapiens mRNA for RP3 gene                 | 4918.211  |
| 10460 | RC_AA463272_at_NA_illumina    | EST: zx97h12.s1 Soares NhHMPu S1            | 4921.935  |
| 10461 | M19508_xpt3_s_at_NA_illumina  | MPO from Human myeloperoxidase gene,        | 4922.5674 |
| 10462 | X14085_s_at_NA_illumina       | GGTB2 Glycoprotein-4-beta-                  | 4923.19   |
| 10463 | M69039_at_GI_28872801-S       | PRE-MRNA SPLICING FACTOR SF2, P32           | 4923.7876 |
| 10464 | X16706_at_GI_44680151-S       | FOS-RELATED ANTIGEN 2                       | 4924.8315 |
| 10465 | H43501_at_NA_illumina         | EST: yn98b01.r1 Homo sapiens cDNA           | 4924.963  |
| 10466 | RC_AA425919_at_GI_32967299-A  | EST: zv48g04.s1 Soares ovary tumor          | 4926.8633 |
| 10467 | AA452454_at_GI_29550859-S     | EST: zx29g02.r1 Soares total fetus          | 4927.0635 |
| 10468 | X84373_at_GI_4505454-S        | NUCLEAR FACTOR RIP140                       | 4928.292  |
| 10469 | M54992_at_GI_4502682-S        | CD72 CD72 antigen                           | 4928.8564 |
| 10470 | RC_D53092_at_GI_42544242-S    | EST: Human fetal brain cDNA 3'-end GEN-     | 4930.3657 |
| 10471 | RC_AA479096_at_GI_7019410-S   | EST: zv17e07.s1 Soares NhHMPu S1            | 4931.225  |
| 10472 | RC_AA406373_at_NA_illumina    | EST: zv10c11.s1 Soares NhHMPu S1            | 4931.32   |
| 10473 | RC_AA447225_at_GI_42476071-S  | EST: zw91h06.s1 Soares total fetus          | 4931.6157 |
| 10474 | U52522_at_GI_38569401-S       | Arfaptin 2, putative target protein of ADP- | 4931.983  |
| 10475 | L47125_s_at_GI_5360213-S      | EEF1A1 Translation elongation factor 1-     | 4933.2134 |
| 10476 | L32137_at_GI_40217842-S       | COMP Cartilage oligomeric matrix protein    | 4933.9224 |
| 10477 | H23893_at_NA_illumina         | Yn71g12.r1 Homo sapiens cDNA clone          | 4934.8076 |
| 10478 | M22632_at_GI_4504068-S        | GOT2 Glutamic-oxaloacetic transaminase      | 4935.5366 |
| 10479 | RC_AA233856_at_NA_illumina    | EST: zr47a06.s1 Soares NhHMPu S1            | 4936.3296 |
| 10480 | M16652_s_at_NA_illumina       | ELA1 Elastase 1, pancreatic (elastase IIA)  | 4936.8594 |

|       |                              |                                            |           |
|-------|------------------------------|--------------------------------------------|-----------|
| 10481 | U85193_at_NA_illumina        | Nuclear factor I-B2 (NFIB2) mRNA           | 4937.9106 |
| 10482 | RC_AA210850_at_NA_illumina   | EST: zq85h01.s1 Stratagene hNT neuron      | 4938.64   |
| 10483 | AA449887_at_NA_illumina      | EST: zx37d06.r1 Soares total fetus         | 4941.2812 |
| 10484 | U90907_at_NA_illumina        | Clone 23907 mRNA sequence                  | 4941.6377 |
| 10485 | AA090439_at_GI_45007036-S    | GUANINE NUCLEOTIDE-BINDING                 | 4942.255  |
| 10486 | RC_AA456437_at_GI_37059742-S | EST: zx34h08.s1 Soares total fetus         | 4942.7334 |
| 10487 | RC_AA399164_at_NA_illumina   | EST: zt57a02.s1 Soares testis NHT Homo     | 4943.98   |
| 10488 | RC_AA427816_at_NA_illumina   | EST: zw50a01.s1 Soares total fetus         | 4945.4556 |
| 10489 | D13640_at_GI_29826333-S      | HLA-C Major histocompatibility complex,    | 4945.799  |
| 10490 | RC_AA621601_at_GI_31543536-S | EST: af47g08.s1 Soares total fetus         | 4946.2905 |
| 10491 | D31167_s_at_GI_39777589-A    | EST: Human fetal-lung cDNA 5'-end          | 4946.763  |
| 10492 | RC_AA412019_at_GI_11545913-S | EST: zt68b12.s1 Soares testis NHT Homo     | 4947.633  |
| 10493 | X07290_at_GI_8923203-A       | ZINC FINGER PROTEIN HF.12                  | 4947.766  |
| 10494 | X07290_at-2_NA_illumina      | ZINC FINGER PROTEIN HF.12                  | 4947.766  |
| 10495 | RC_AA449725_at_GI_10190705-S | EST: zx09c06.s1 Soares total fetus         | 4948.2393 |
| 10496 | M33493_s_at_NA_illumina      | Tryptase-III mRNA, 3' end                  | 4948.4277 |
| 10497 | RC_AA423865_at_NA_illumina   | EST: zv79e09.s1 Soares total fetus         | 4950.1133 |
| 10498 | RC_AA495983_at_NA_illumina   | Notch (Drosophila) homolog 3               | 4950.5967 |
| 10499 | AF001900_at_NA_illumina      | Secreted frizzled-related protein 1        | 4951.64   |
| 10500 | T39897_s_at_GI_40316940-S    | EST: ya13a11.r1 Homo sapiens cDNA          | 4955.8823 |
| 10501 | L23808_at_GI_4505206-S       | MMP12 Matrix metalloproteinase 12          | 4957.6045 |
| 10502 | RC_AA490210_at_NA_illumina   | Tropomyosin 1 (alpha)                      | 4958.155  |
| 10503 | RC_AA233529_at_GI_34147366-S | EST: zr30g05.s1 Stratagene NT2 neuronal    | 4958.8496 |
| 10504 | RC_AA421250_at_NA_illumina   | EST: zu27b03.s1 Soares ovary tumor         | 4959.339  |
| 10505 | W55852_at_NA_illumina        | EST: za09g12.r1 Soares melanocyte          | 4961.0977 |
| 10506 | RC_AA235707_at_GI_15011923-A | EST: zt31e08.s1 Soares ovary tumor         | 4963.8604 |
| 10507 | RC_AA490159_at_GI_21361125-S | Glucose-6-phosphatase, transport           | 4964.4155 |
| 10508 | K03207_f_at-2_NA_illumina    | Proline-rich protein BstNI subfamily 4     | 4965.0293 |
| 10509 | K03207_f_at_GI_41349489-S    | PRH1 Proline-rich protein HaellI subfamily | 4965.0293 |
| 10510 | M64992_at_GI_23110933-A      | PSMA2 Proteasome component C2              | 4965.0435 |
| 10511 | M62424_at-2_NA_illumina      | Coagulation factor II (thrombin) receptor  | 4965.7417 |
| 10512 | M62424_at_GI_6031164-S       | F2R Coagulation factor II (thrombin)       | 4965.7417 |
| 10513 | H85185_at_NA_illumina        | EST: ys67f01.r1 Homo sapiens cDNA          | 4967.528  |
| 10514 | R75694_at_GI_39725935-S      | BRAIN NEURON CYTOPLASMIC                   | 4968.328  |
| 10515 | X87237_at-2_NA_illumina      | H.sapiens mRNA for processing a-           | 4968.7188 |
| 10516 | X87237_at_GI_5453661-S       | Processing a-glucosidase I                 | 4968.7188 |
| 10517 | X52425_at_GI_4557668-S       | IL4R Interleukin 4 receptor                | 4970.3037 |
| 10518 | D87116_at_GI_21618348-A      | DUAL SPECIFICITY MITOGEN-                  | 4972.8857 |
| 10519 | M11166_s_at_NA_illumina      | Arginine vasopressin (neurophysin II,      | 4972.908  |
| 10520 | RC_AA461463_at_GI_37540877-S | EST: zx68e04.s1 Soares total fetus         | 4974.0874 |
| 10521 | U90268_at-2_NA_illumina      | Ankyrin repeat-containing protein          | 4975.4443 |
| 10522 | U90268_at_NA_illumina        | Krit1 mRNA                                 | 4975.4443 |
| 10523 | RC_AA243422_at_NA_illumina   | EST: zs15b12.s1 NCI_CGAP_GCB1              | 4977.412  |

|       |                               |                                             |           |
|-------|-------------------------------|---------------------------------------------|-----------|
| 10524 | X16662_at_GI_4502112-S        | ANX8 Annexin VIII                           | 4978.3286 |
| 10525 | RC_AA400766_at_GI_37541410-S  | Homo sapiens mRNA for KIAA0556              | 4980.1587 |
| 10526 | RC_AA236223_at_NA_illumina    | EST: zr51c01.s1 Soares NhHMPu S1            | 4981.3335 |
| 10527 | RC_AA292290_at_NA_illumina    | EST: zt51c08.s1 Soares ovary tumor          | 4983.804  |
| 10528 | RC_AA405449_at_GI_8922904-S   | EST: zw36a04.s1 Soares total fetus          | 4984.4263 |
| 10529 | RC_AA253331_at_NA_illumina    | EST: zr72g02.s1 Soares NhHMPu S1            | 4984.754  |
| 10530 | Y00064_at_GI_4502806-S        | CHGB Chromogranin B (secretogranin 1)       | 4986.1655 |
| 10531 | U83115_at_GI_37551098-S       | Non-lens beta gamma-crystallin like         | 4990.527  |
| 10532 | RC_AA412001_at_NA_illumina    | EST: zt68a03.s1 Soares testis NHT Homo      | 4990.6562 |
| 10533 | M96233_s_at_NA_illumina       | GSTM4 Glutathione S-transferase M4          | 4991.6094 |
| 10534 | AA379742_at_GI_34222197-S     | EST: EST92623 Skin tumor I Homo             | 4991.9873 |
| 10535 | RC_AA293163_at_NA_illumina    | EST: zt55e05.s1 Soares ovary tumor          | 4992.6235 |
| 10536 | RC_AA425855_s_at_NA_illumina  | EST: zw47h02.s1 Soares total fetus          | 4993.096  |
| 10537 | AA504413_at_GI_22748726-S     | EST: aa59e07.r1 NCI_CGAP_GCB1               | 4993.981  |
| 10538 | RC_AA421264_at_NA_illumina    | EST: zu06b02.s1 Soares testis NHT Homo      | 4994.424  |
| 10539 | RC_AA085934_at_NA_illumina    | EST: zn54c11.s1 Stratagene muscle           | 4995.6973 |
| 10540 | RC_AA434245_r_at_NA_illumina  | EST: zw24g05.s1 Soares ovary tumor          | 4998.8096 |
| 10541 | RC_AA236951_s_at_GI_29837653- | H.sapiens gene from PACs 125H23 and         | 5000.4727 |
| 10542 | H43250_at_NA_illumina         | EST: yp05f06.r1 Homo sapiens cDNA           | 5000.9663 |
| 10543 | D26156_s_at_GI_21071055-S     | Transcriptional activator hSNF2b            | 5002.1616 |
| 10544 | Y12670_at_NA_illumina         | LEPR Leptin receptor                        | 5003.5405 |
| 10545 | AB002382_at_GI_10835009-S     | KIAA0384 gene                               | 5003.6284 |
| 10546 | X52889_at_NA_illumina         | MYH7 Myosin, heavy polypeptide 7,           | 5004.5376 |
| 10547 | M31525_at_NA_illumina         | HLA-DNA Major histocompatibility            | 5006.622  |
| 10548 | RC_AA460532_at_NA_illumina    | Proteasome (prosome, macropain) 26S         | 5010.3706 |
| 10549 | RC_AA142842_at_NA_illumina    | EST: zl40a07.s1 Soares pregnant uterus      | 5011.016  |
| 10550 | H29992_at_NA_illumina         | EST: yp44g05.r1 Homo sapiens cDNA           | 5011.2744 |
| 10551 | RC_AA621434_at_NA_illumina    | EST: af34h05.s1 Soares total fetus          | 5012.0625 |
| 10552 | RC_AA454978_at_GI_33636751-S  | EST: zx99d10.s1 Soares NhHMPu S1            | 5012.082  |
| 10553 | X95632_s_at-2_NA_illumina     | H.sapiens mRNA for Arg protein tyrosine     | 5012.932  |
| 10554 | X95632_s_at_NA_illumina       | Arg protein tyrosine kinase-binding protein | 5012.932  |
| 10555 | M37104_at_GI_19913429-S       | ATP5 ATP synthase, H+ transporting,         | 5015.6533 |
| 10556 | AA405082_at_NA_illumina       | EST: zu12g04.r1 Soares testis NHT Homo      | 5015.794  |
| 10557 | N56415_s_at_GI_39753954-S     | Human Chromosome 16 BAC clone               | 5016.823  |
| 10558 | D83783_at_NA_illumina         | KIAA0192 gene, partial cds                  | 5017.3965 |
| 10559 | D83783_at-2_NA_illumina       | Thyroid hormone receptor-associated         | 5017.3965 |
| 10560 | U91930_at_GI_40018647-S       | AP-3 complex delta subunit mRNA             | 5017.7124 |
| 10561 | RC_AA608850_at_NA_illumina    | EIF4E-like cap-binding protein              | 5020.245  |
| 10562 | AA095039_at_NA_illumina       | Cp2534.seq.F Fetal heart, Lambda ZAP        | 5020.572  |
| 10563 | RC_AA459255_at_GI_31542706-S  | EST: aa27b08.s1 NCI_CGAP_GCB1               | 5020.966  |
| 10564 | RC_AA476319_at_GI_37540816-S  | EST: zw99b03.s1 Soares total fetus          | 5022.425  |
| 10565 | U90716_at_GI_20149514-S       | Cell surface protein HCAR mRNA              | 5023.6562 |
| 10566 | U01102_at_GI_39725696-S       | UGB Uteroglobin                             | 5025.1123 |

|       |                                |                                          |           |
|-------|--------------------------------|------------------------------------------|-----------|
| 10567 | RC_AA450364_at_NA_illumina     | Rho-associated, coiled-coil containing   | 5026.025  |
| 10568 | AA128724_at_GI_38327033-S      | Homo sapiens mRNA for KIAA0684           | 5027.5396 |
| 10569 | RC_AA426404_at_NA_illumina     | EST: zv05g05.s1 Soares NhHMPu S1         | 5028.108  |
| 10570 | RC_AA463886_s_at_GI_38788107-  | Small glutamine-rich tetratricopeptide   | 5028.977  |
| 10571 | W52821_at_NA_illumina          | EST: zc55c07.r1 Soares senescent         | 5029.1904 |
| 10572 | U84573_at_GI_4505888-A         | Lysyl hydroxylase isoform 2 (PLOD2)      | 5029.579  |
| 10573 | R15268_at_GI_31317251-A        | EST: yf89f02.r1 Homo sapiens cDNA        | 5030.682  |
| 10574 | U07132_at_GI_11321629-S        | Orphan receptor mRNA, partial cds        | 5032.323  |
| 10575 | RC_AA412481_r_at_GI_21359970-S | EST: zt97g12.s1 Soares testis NHT Homo   | 5034.994  |
| 10576 | RC_AA136940_at_NA_illumina     | EST: zn97h02.s1 Stratagene fetal retina  | 5037.867  |
| 10577 | X16260_s_at_GI_4504780-S       | ITIH3 Pre-alpha (globulin) inhibitor, H3 | 5039.169  |
| 10578 | X16260_s_at-2_NA_illumina      | Inter-alpha (globulin) inhibitor, H1     | 5039.169  |
| 10579 | RC_AA452857_at_NA_illumina     | EST: zx41c04.s1 Soares total fetus       | 5039.9565 |
| 10580 | X80692_at_GI_16306569-S        | ERK3 protein kinase mRNA                 | 5040.7197 |
| 10581 | RC_AA401345_s_at_GI_11056017-  | EST: zu62d03.s1 Soares testis NHT Homo   | 5040.8237 |
| 10582 | RC_AA482010_at_NA_illumina     | Homo sapiens mRNA for KIAA0747           | 5041.2188 |
| 10583 | RC_AA465339_at_NA_illumina     | EST: aa23a05.s1 NCI_CGAP_GCB1            | 5042.0293 |
| 10584 | RC_AA482127_at_GI_7382497-S    | Homo sapiens mRNA for PAK4 protein       | 5042.2476 |
| 10585 | RC_AA432178_at_GI_20127527-S   | EST: zw71g02.s1 Soares testis NHT        | 5042.699  |
| 10586 | L38810_at_GI_24497434-S        | Thyroid receptor interactor (TRIP1) mRNA | 5046.0435 |
| 10587 | RC_AA233178_at_NA_illumina     | Homo sapiens mRNA for KIAA0831           | 5046.1045 |
| 10588 | L41351_at_GI_21536453-S        | Prostasin mRNA                           | 5048.1997 |
| 10589 | AA094996_at_NA_illumina        | Homo sapiens clone 628 unknown mRNA,     | 5048.7593 |
| 10590 | D86970_at_NA_illumina          | KIAA0216 gene                            | 5049.0215 |
| 10591 | RC_AA609195_at_NA_illumina     | EST: af12d09.s1 Soares testis NHT Homo   | 5049.2705 |
| 10592 | RC_AA196285_at_NA_illumina     | EST: zp92c01.s1 Stratagene HeLa cell s3  | 5051.859  |
| 10593 | AA410325_at_GI_38788170-A      | EST: zv11e04.r1 Soares NhHMPu S1         | 5051.9355 |
| 10594 | L38951_at_GI_24797084-S        | Importin beta subunit mRNA               | 5052.2373 |
| 10595 | RC_AA236476_at_GI_12383050-S   | EST: zr75c01.s1 Soares NhHMPu S1         | 5052.311  |
| 10596 | U78525_at_GI_33239446-A        | Eukaryotic translation initiation factor | 5052.4233 |
| 10597 | AA455206_at_GI_31657098-A      | EST: zx79g02.r1 Soares ovary tumor       | 5054.7715 |
| 10598 | AA401894_at_GI_19923541-S      | EST: zt67c03.r1 Soares testis NHT Homo   | 5055.253  |
| 10599 | RC_AA482294_at_GI_42476129-S   | EST: aa53h07.s1 NCI_CGAP_GCB1            | 5055.9263 |
| 10600 | RC_AA482597_at_GI_4885526-A    | EST: zu98h10.s1 NCI_CGAP_GCB1            | 5055.9995 |
| 10601 | AA263028_at_GI_21735620-S      | Homo sapiens malate dehydrogenase        | 5056.3027 |
| 10602 | RC_AA430036_at_NA_illumina     | EST: zw65f10.s1 Soares testis NHT Homo   | 5056.507  |
| 10603 | D45278_at_NA_illumina          | EST: Human brain cDNA, mRNA              | 5057.4575 |
| 10604 | RC_AA428239_at_GI_14589930-A   | EST: zw51d03.s1 Soares total fetus       | 5059.205  |
| 10605 | AA095791_at_NA_illumina        | EST: I5920.seq.F Fetal heart, Lambda     | 5060.34   |
| 10606 | RC_AA211777_at_GI_38175820-S   | EST: zn57d02.s1 Stratagene muscle        | 5060.7954 |
| 10607 | RC_AA224328_at_NA_illumina     | EST: zr12f02.s1 Stratagene hNT neuron    | 5060.858  |
| 10608 | W37083_at_NA_illumina          | EST: zb21d04.r1 Soares fetal lung        | 5061.6665 |
| 10609 | RC_AA399260_at_NA_illumina     | EST: zt57f08.s1 Soares testis NHT Homo   | 5062.471  |

|       |                              |                                              |           |
|-------|------------------------------|----------------------------------------------|-----------|
| 10610 | RC_AA286710_at_GI_4885454-S  | Lymphocyte adaptor protein                   | 5062.553  |
| 10611 | RC_AA045517_at_NA_illumina   | Human DNA sequence from clone 774124         | 5063.0366 |
| 10612 | C01782_at_NA_illumina        | EST: HUMGS0003737, Human Gene                | 5064.331  |
| 10613 | RC_AA446963_at_NA_illumina   | EST: zw85f01.s1 Soares total fetus           | 5065.103  |
| 10614 | T35656_at_GI_4507284-S       | EST: EST88863 Homo sapiens cDNA 5'           | 5065.77   |
| 10615 | AA412555_at_NA_illumina      | Homo sapiens putative 13 S Golgi             | 5066.603  |
| 10616 | RC_AA433952_at_GI_21536424-S | Homo sapiens formin binding protein 21       | 5066.644  |
| 10617 | RC_AA180487_at_NA_illumina   | Homo sapiens TACC1 (TACC1) mRNA,             | 5066.647  |
| 10618 | X95586_at_GI_22538468-S      | PSMB5 Proteasome (prosome,                   | 5068.5225 |
| 10619 | RC_AA233180_at_GI_25121979-S | EST: zr69f04.s1 Soares NhHMPu S1             | 5069.161  |
| 10620 | RC_AA490261_s_at_NA_illumina | EST: aa44c08.s1 Soares NhHMPu S1             | 5069.237  |
| 10621 | RC_AA262477_at_GI_38455390-S | Homo sapiens mRNA for ribonuclease H I       | 5070.8794 |
| 10622 | W28516_at_NA_illumina        | EST: 47h7 Human retina cDNA randomly         | 5071.1426 |
| 10623 | AA203523_at_NA_illumina      | EST: zx56e09.r1 Soares fetal liver spleen    | 5073.456  |
| 10624 | U10868_at_GI_4502042-S       | ALDH7 Aldehyde dehydrogenase 7               | 5073.6514 |
| 10625 | AA504744_at_GI_22035563-A    | EST: aa63f03.r1 NCI_CGAP_GCB1 Homo           | 5073.9927 |
| 10626 | RC_AA346551_at_NA_illumina   | EST: EST52717 Fetal heart II Homo            | 5075.793  |
| 10627 | RC_AA256367_s_at_NA_illumina | Paraoxonase 3                                | 5079.0044 |
| 10628 | Z48633_at_NA_illumina        | Retrotransposon                              | 5079.2563 |
| 10629 | U85767_at_GI_22538807-A      | Myeloid progenitor inhibitory factor-1 MPIF- | 5081.572  |
| 10630 | U85767_at-2_NA_illumina      | Small inducible cytokine subfamily A (Cys-   | 5081.572  |
| 10631 | AA091752_at_NA_illumina      | Homo sapiens histone H2A.F/Z variant         | 5081.623  |
| 10632 | AA458603_at_NA_illumina      | EST: aa12g01.r1 Soares NhHMPu S1             | 5083.503  |
| 10633 | T09468_at_NA_illumina        | Homo sapiens TACC1 (TACC1) mRNA,             | 5084.004  |
| 10634 | D79999_at_NA_illumina        | KIAA0177 gene, partial cds                   | 5084.618  |
| 10635 | X90858_at_GI_31742506-A      | Uridine phosphorylase                        | 5085.8574 |
| 10636 | RC_AA425836_at_NA_illumina   | EST: zv48d10.s1 Soares ovary tumor           | 5086.8457 |
| 10637 | RC_AA115461_at_GI_19923267-S | Inhibitor of protein kinase PKR              | 5087.837  |
| 10638 | L24559_at_GI_20127447-S      | POLA DNA polymerase alpha subunit            | 5090.3438 |
| 10639 | R70167_at_GI_21361605-S      | EST: yj80c06.r1 Homo sapiens cDNA            | 5092.789  |
| 10640 | RC_AA287388_at_GI_14670363-A | EST: zs50f04.s1 NCI_CGAP_GCB1 Homo           | 5093.3755 |
| 10641 | S57212_s_at_NA_illumina      | MEF2C MADS box transcription enhancer        | 5093.9707 |
| 10642 | RC_AA443671_at_NA_illumina   | EST: zw86b12.s1 Soares total fetus           | 5095.559  |
| 10643 | AA491114_at_GI_24475647-S    | EST: aa46e04.r1 NCI_CGAP_GCB1                | 5098.3594 |
| 10644 | RC_AA132969_s_at_NA_illumina | Homo sapiens metalloprotease 1 (MP1)         | 5099.9023 |
| 10645 | RC_AA155820_at_NA_illumina   | Transmembrane 4 superfamily member 6         | 5099.9165 |
| 10646 | HG4263-HT4533_at_NA_illumina | Nkr-P1a Protein                              | 5101.06   |
| 10647 | D15050_at_GI_27597093-S      | Transcription factor AREB6                   | 5101.7217 |
| 10648 | U70660_at_GI_29826339-S      | Copper transport protein HAH1 (HAH1)         | 5103.5483 |
| 10649 | Y14140_at_NA_illumina        | G protein gene encoding beta 3 subunit       | 5104.4194 |
| 10650 | W27827_at_NA_illumina        | Homo sapiens KIAA0439 mRNA, partial          | 5104.957  |
| 10651 | AA259102_at_GI_7019542-S     | EST: zs33f05.r1 NCI_CGAP_GCB1 Homo           | 5105.384  |
| 10652 | AB002353_at_GI_7662075-S     | KIAA0355 gene product                        | 5106.057  |



|       |                                |                                           |           |
|-------|--------------------------------|-------------------------------------------|-----------|
| 10653 | RC_AA370163_at_NA_illumina     | EST: EST81762 Prostate gland I Homo       | 5106.941  |
| 10654 | W26883_at_NA_illumina          | Homo sapiens chromosome 1 atrophin-1      | 5108.6997 |
| 10655 | X72964_at_GI_4757901-S         | CALT Caltractin (20kD calcium-binding     | 5111.4033 |
| 10656 | RC_AA488844_f_at_NA_illumina   | EST: aa55a11.s1 NCI_CGAP_GCB1             | 5111.457  |
| 10657 | RC_AA026349_r_at_GI_37539715-S | EST: zj99f01.s1 Soares pregnant uterus    | 5111.5186 |
| 10658 | RC_AA293123_s_at_GI_19923948-  | EST: zt55a02.s1 Soares ovary tumor        | 5113.973  |
| 10659 | AA130156_at_NA_illumina        | EST: zl35d12.r1 Soares pregnant uterus    | 5114.6206 |
| 10660 | RC_AA001604_at_NA_illumina     | EST: zh82d12.s1 Soares fetal liver spleen | 5114.749  |
| 10661 | D82797_at_GI_11055993-S        | EST: similar to none, mRNA sequence.      | 5115.836  |
| 10662 | AA458540_at_NA_illumina        | EST: zx96d05.r1 Soares ovary tumor        | 5116.136  |
| 10663 | RC_AA412059_at_NA_illumina     | EST: zt65h08.s1 Soares testis NHT Homo    | 5116.272  |
| 10664 | U18009_at_GI_18379348-S        | Chromosome 17q21 mRNA clone LF113         | 5116.424  |
| 10665 | RC_D59682_r_at_NA_illumina     | EST: Human fetal brain cDNA 3'-end GEN-   | 5117.766  |
| 10666 | M17229_s_at_NA_illumina        | Human MRC OX-2 antigen gene, exon 5.      | 5118.7524 |
| 10667 | RC_AA448209_at_GI_7657495-S    | EST: zw96b03.s1 Soares total fetus        | 5120.3076 |
| 10668 | K03195_at_GI_5730050-S         | (HepG2) glucose transporter gene mRNA     | 5120.469  |
| 10669 | U75285_rna1_at_NA_illumina     | Apoptosis inhibitor 4 (survivin)          | 5121.3564 |
| 10670 | AA248802_at_GI_20143911-A      | EST: j4151.seq.F Human fetal heart,       | 5121.9307 |
| 10671 | W36280_s_at_NA_illumina        | Homo sapiens RRM RNA binding protein      | 5122.843  |
| 10672 | X07743_at_GI_4505878-S         | PLECKSTRIN                                | 5123.105  |
| 10673 | AA306192_at_NA_illumina        | Homo sapiens mRNA for NORI-1,             | 5123.8584 |
| 10674 | AA090622_at_GI_42518066-S      | EST: y1032.seq.F Fetal heart, Lambda      | 5123.944  |
| 10675 | U29175_at_NA_illumina          | Transcriptional activator hSNF2b          | 5124.651  |
| 10676 | W26770_at_NA_illumina          | EST: 12g4 Human retina cDNA randomly      | 5125.188  |
| 10677 | D57975_at_NA_illumina          | EST: Human aorta cDNA 5'-end GEN-         | 5127.6484 |
| 10678 | R78190_at_NA_illumina          | EST: yi81g03.r1 Homo sapiens cDNA         | 5128.4136 |
| 10679 | AA133244_at_GI_9507202-S       | EST: zl17g11.r1 Soares pregnant uterus    | 5131.301  |
| 10680 | AA033543_at_GI_23397455-S      | Homo sapiens Chromosome 16 BAC clone      | 5132.5396 |
| 10681 | S81003_at_GI_38157977-A        | L-UBC                                     | 5133.35   |
| 10682 | RC_AA179298_at_NA_illumina     | Homo sapiens chromosome 9, P1 clone       | 5134.0806 |
| 10683 | RC_AA149828_at_NA_illumina     | EST: zl47d09.s1 Soares pregnant uterus    | 5134.61   |
| 10684 | M37721_at_GI_21070979-A        | PAM Peptidylglycine alpha-amidating       | 5135.0034 |
| 10685 | U07695_at_GI_32528300-S        | HTK Hepatoma transmembrane kinase         | 5136.144  |
| 10686 | AA053840_at_NA_illumina        | EST: zf53d05.r1 Soares retina N2b4HR      | 5136.389  |
| 10687 | HG2280-HT2376_at_NA_illumina   | D-Amino-Acid Oxidase                      | 5137.7476 |
| 10688 | RC_AA137269_s_at_NA_illumina   | EST: zn94d01.s1 Stratagene lung           | 5138.1543 |
| 10689 | X84707_rna1_at_GI_5729924-S    | MIA gene                                  | 5139.1875 |
| 10690 | RC_AA282179_at_NA_illumina     | EST: zt04h08.s1 NCI_CGAP_GCB1 Homo        | 5139.4683 |
| 10691 | H51057_at_GI_5729867-S         | EST: yp84f11.r1 Homo sapiens cDNA         | 5141.251  |
| 10692 | Z49254_at_GI_27436903-S        | L23-related mRNA                          | 5141.4043 |
| 10693 | AA248870_at_GI_34147619-S      | EST: jj8979.seq.F Human fetal heart,      | 5141.578  |
| 10694 | AA452316_at_GI_34304378-A      | Homo sapiens inversin protein mRNA,       | 5145.574  |
| 10695 | RC_AA419461_at_NA_illumina     | EST: zu99d05.s1 NCI_CGAP_GCB1             | 5146.399  |

|       |                                |                                              |           |
|-------|--------------------------------|----------------------------------------------|-----------|
| 10696 | AA203628_at_NA_illumina        | Insulin-like growth factor binding protein 6 | 5147.4917 |
| 10697 | AA248283_at_GI_31559784-S      | EST: csg2234.seq.F Human fetal heart,        | 5147.9917 |
| 10698 | M98776_rna1_at_GI_17318568-S   | Keratin 1 gene                               | 5148.9917 |
| 10699 | M98776_rna1_at-2_NA_illumina   | KERATIN, TYPE II CYTOSKELETAL 1              | 5148.9917 |
| 10700 | U46746_s_at-2_NA_illumina      | Human dystrobrevin-epsilon mRNA,             | 5150.2715 |
| 10701 | U46746_s_at_NA_illumina        | Dystrobrevin-alpha mRNA                      | 5150.2715 |
| 10702 | RC_AA040244_at_GI_20357531-S   | EST: zk44d12.s1 Soares pregnant uterus       | 5150.8506 |
| 10703 | AA380393_at_NA_illumina        | EST: EST93352 Supt cells Homo sapiens        | 5151.031  |
| 10704 | RC_AA487557_at_NA_illumina     | EST: ab20h12.s1 Stratagene lung              | 5152.3687 |
| 10705 | U13991_at_GI_21166374-S        | TATA-binding protein associated factor 30    | 5153.23   |
| 10706 | M63483_at_GI_34335242-S        | MATRIN 3                                     | 5154.4    |
| 10707 | T87560_at_NA_illumina          | EST: yd83b10.r1 Homo sapiens cDNA            | 5155.088  |
| 10708 | M63391_rna1_at_GI_18105049-S   | Desmin gene                                  | 5155.7383 |
| 10709 | RC_AA430208_at_NA_illumina     | EST: zw59e02.s1 Soares total fetus           | 5157.741  |
| 10710 | RC_AA476914_at_GI_24308523-S   | EST: zu38b06.s1 Soares ovary tumor           | 5158.114  |
| 10711 | L13720_at_GI_4557616-S         | Growth-arrest-specific protein (gas) mRNA    | 5158.428  |
| 10712 | X52730_rna1_at_GI_31543421-S   | Phenylethanolamine n-methyltransferase       | 5160.076  |
| 10713 | D11428_at_GI_24430164-A        | PMP22 Peripheral myelin protein 22           | 5160.289  |
| 10714 | RC_AA411771_at_GI_41349444-A   | KIAA0671 gene product                        | 5160.3745 |
| 10715 | L35240_at_GI_42741673-S        | Enigma gene                                  | 5160.743  |
| 10716 | L35240_at-2_NA_illumina        | Enigma (LIM domain protein)                  | 5160.743  |
| 10717 | R66920_at_NA_illumina          | Poly(A)-binding protein-like 1               | 5161.4795 |
| 10718 | H30415_at_NA_illumina          | EST: yn80c11.r1 Homo sapiens cDNA            | 5162.2666 |
| 10719 | AA376905_at_NA_illumina        | EST: EST89437 Small intestine I Homo         | 5164.0586 |
| 10720 | RC_AA195994_s_at_GI_27436975-S | EST: zp96b11.s1 Stratagene muscle            | 5164.153  |
| 10721 | X13403_s_at_GI_42476163-S      | POU domain, class 2, transcription factor 1  | 5166.389  |
| 10722 | W70201_at_NA_illumina          | EST: zd49a11.r1 Soares fetal heart           | 5168.15   |
| 10723 | N77564_at_GI_34335276-S        | EST: yz89g12.r1 Homo sapiens cDNA            | 5170.2734 |
| 10724 | AB002346_at_GI_26190607-S      | Inositol phosphate 5'-phosphatase 2          | 5173.0234 |
| 10725 | RC_AA441896_at_GI_8923254-S    | EST: zw56a08.s1 Soares total fetus           | 5173.712  |
| 10726 | RC_AA164679_at_NA_illumina     | EST: zo93b02.s1 Stratagene ovarian           | 5174.114  |
| 10727 | T34527_at_NA_illumina          | UDP-N-acetyl-alpha-D-                        | 5174.5664 |
| 10728 | RC_AA449912_at_NA_illumina     | EST: zx37g01.s1 Soares total fetus           | 5176.308  |
| 10729 | M73255_rna1_s_at_NA_illumina   | Vascular cell adhesion molecule 1            | 5178.3984 |
| 10730 | J03915_s_at_GI_10800418-S      | CHGA Chromogranin A                          | 5180.095  |
| 10731 | W17360_at_NA_illumina          | EST: zb18f07.r1 Soares fetal lung            | 5180.458  |
| 10732 | RC_AA282846_at_NA_illumina     | EST: zt14a10.s1 NCI_CGAP_GCB1 Homo           | 5181.9263 |
| 10733 | W94041_s_at_NA_illumina        | EST: zd99h02.r1 Soares fetal heart           | 5182.7324 |
| 10734 | U95301_at_GI_4505844-S         | Phospholipase A2, group X                    | 5183.4287 |
| 10735 | RC_AA215383_at_GI_31543661-S   | EST: zr97d02.s1 NCI_CGAP_GCB1 Homo           | 5187.4487 |
| 10736 | R82229_at_GI_34147578-S        | Homo sapiens clone 23956 mRNA, partial       | 5188.0044 |
| 10737 | RC_AA405612_at_NA_illumina     | Interferon-related developmental regulator   | 5190.072  |
| 10738 | RC_AA056451_at_NA_illumina     | EST: zl69d05.s1 Stratagene colon             | 5190.208  |

|       |                               |                                              |           |
|-------|-------------------------------|----------------------------------------------|-----------|
| 10739 | RC_AA458852_f_at_GI_7662125-S | EST: aa26c09.s1 NCI_CGAP_GCB1                | 5190.2466 |
| 10740 | U20499_at_NA_illumina         | Estrogen sulfotransferase mRNA               | 5190.7837 |
| 10741 | J03241_s_at_GI_4507464-S      | TGFB3 Transforming growth factor, beta 3     | 5191.7324 |
| 10742 | RC_AA283823_at_NA_illumina    | EST: zs49e08.s1 NCI_CGAP_GCB1                | 5193.2993 |
| 10743 | RC_AA182030_at_NA_illumina    | EST: zp57a03.s1 Stratagene endothelial       | 5194.591  |
| 10744 | AB000462_at_GI_19923154-S     | SH3 binding protein, clone RES4-23A          | 5194.8433 |
| 10745 | U36922_at_NA_illumina         | Fork head domain protein (FKHR) mRNA,        | 5195.0244 |
| 10746 | W78776_at_NA_illumina         | EST: zh49g10.r1 Soares fetal liver spleen    | 5195.284  |
| 10747 | M31328_at_GI_21071080-S       | GNB3 Guanine nucleotide binding protein      | 5196.339  |
| 10748 | AA149543_at_NA_illumina       | EST: zl28g06.r1 Soares pregnant uterus       | 5198.3066 |
| 10749 | RC_AA065169_at_NA_illumina    | EST: zm50c09.s1 Stratagene fibroblast        | 5198.608  |
| 10750 | P-Select_at_NA_illumina       | No description for gene: P-Select_at         | 5199.6245 |
| 10751 | RC_D60436_at_NA_illumina      | EST: Human fetal brain cDNA 3'-end GEN-      | 5199.7397 |
| 10752 | RC_AA399271_at_GI_39725643-A  | EST: zt57h04.s1 Soares testis NHT Homo       | 5202.93   |
| 10753 | RC_AA456303_at_GI_33286433-A  | EST: aa13f09.s1 Soares NhHMPu S1             | 5208.297  |
| 10754 | AA399200_at_GI_41222851-S     | EST: zt52e04.r1 Soares ovary tumor           | 5209.5215 |
| 10755 | W74158_at_NA_illumina         | EST: zd03d06.r1 Pancreatic Islet Homo        | 5209.5645 |
| 10756 | RC_AA279847_at_NA_illumina    | EST: zs92f11.s1 NCI_CGAP_GCB1 Homo           | 5210.2236 |
| 10757 | RC_AA398538_at_GI_41281572-S  | EST: zt73c02.s1 Soares testis NHT Homo       | 5211.526  |
| 10758 | RC_AA609306_at_NA_illumina    | EST: af13g03.s1 Soares testis NHT Homo       | 5213.9893 |
| 10759 | RC_AA621108_at_NA_illumina    | EST: af34d10.s1 Soares total fetus           | 5216.5215 |
| 10760 | RC_AA452925_at_NA_illumina    | Eukaryotic translation initiation factor 3,  | 5216.546  |
| 10761 | U37219_at_GI_22547209-A       | Cyclophilin-like protein CyP-60 mRNA         | 5217.317  |
| 10762 | RC_AA621680_at_NA_illumina    | Endothelial Kruppel-like zinc finger protein | 5217.8916 |
| 10763 | M57888_rna1_s_at_NA_illumina  | Granzyme B (granzyme 2, cytotoxic T-         | 5218.693  |
| 10764 | RC_AA076326_at_GI_7110714-S   | Ribosomal protein L32                        | 5218.846  |
| 10765 | Z47055_s_at_GI_41281370-S     | Partial cDNA sequence, farnesyl              | 5219.0303 |
| 10766 | H52358_at_GI_16507203-S       | EST: yu36h07.r1 Homo sapiens cDNA            | 5219.3984 |
| 10767 | RC_AA431773_at_GI_14141179-S  | Homo sapiens clone 23716 mRNA                | 5219.8228 |
| 10768 | RC_AA417741_at_GI_31341800-S  | EST: zv01c10.s1 NCI_CGAP_GCB1                | 5220.577  |
| 10769 | X87212_at_GI_22538439-A       | CTSC Cathepsin C                             | 5220.8584 |
| 10770 | HG415-HT415_at_NA_illumina    | Lectin, Galactoside-Binding, Soluble, 2      | 5220.9424 |
| 10771 | J05481_s_at_NA_illumina       | Endoglin (Osler-Rendu-Weber syndrome         | 5221.6646 |
| 10772 | X03635_at_GI_4503602-S        | ESR Estrogen receptor                        | 5222.801  |
| 10773 | RC_AA258813_at_GI_31377613-S  | EST: zs32e05.s1 NCI_CGAP_GCB1                | 5223.066  |
| 10774 | RC_AA463861_at_GI_9966860-S   | EST: zx97c05.s1 Soares NhHMPu S1             | 5223.4707 |
| 10775 | C02582_at_GI_31563513-A       | EST: HUMGS0012483, Human Gene                | 5224.554  |
| 10776 | RC_AA400200_at_NA_illumina    | Transcription factor Dp-2 (E2F               | 5224.799  |
| 10777 | RC_AA456821_at_GI_24041025-S  | EST: aa38e07.s1 NCI_CGAP_GCB1                | 5225.4854 |
| 10778 | RC_AA040062_s_at_GI_37059778- | EST: zk46c08.s1 Soares pregnant uterus       | 5227.877  |
| 10779 | RC_AA121266_at_NA_illumina    | EST: zk91c02.s1 Soares pregnant uterus       | 5228.1245 |
| 10780 | RC_AA480114_at_NA_illumina    | EST: zv41h05.s1 Soares ovary tumor           | 5230.1147 |
| 10781 | M23294_at_GI_13128866-S       | HEXB Hexosaminidase B (beta                  | 5232.5776 |

|       |                                |                                                |           |
|-------|--------------------------------|------------------------------------------------|-----------|
| 10782 | D13627_at_GI_6005726-S         | KIAA0002 gene                                  | 5232.8984 |
| 10783 | RC_AA429809_at_NA_illumina     | EST: zw64a12.s1 Soares testis NHT              | 5235.4883 |
| 10784 | HG1869-HT1904_at_NA_illumina   | Male Enhanced Antigen                          | 5236.009  |
| 10785 | RC_AA504496_at_NA_illumina     | EST: aa60f03.s1 NCI_CGAP_GCB1 Homo             | 5236.1743 |
| 10786 | RC_AA299789_at_GI_13443017-S   | EST: EST12356 Uterus tumor I Homo              | 5236.838  |
| 10787 | U79287_at_GI_33695089-S        | Clone 23867 mRNA sequence                      | 5237.5596 |
| 10788 | T93544_s_at_NA_illumina        | Homo sapiens mRNA for KIAA0630                 | 5237.9272 |
| 10789 | L19871_at_GI_4502262-A         | ATF3 Activating transcription factor 3         | 5237.9976 |
| 10790 | RC_AA026046_s_at_NA_illumina   | EST: ze86a02.s1 Soares fetal heart             | 5238.535  |
| 10791 | AA057287_at_NA_illumina        | EST: zk70e04.r1 Soares pregnant uterus         | 5238.666  |
| 10792 | RC_AA227498_at_NA_illumina     | EST: zr18f05.s1 Stratagene NT2 neuronal        | 5239.7446 |
| 10793 | RC_AA232247_at_GI_40217811-A   | EST: zr75g08.s1 Soares NhHMPu S1               | 5242.88   |
| 10794 | RC_AA151593_at_NA_illumina     | EST: zl27e02.s1 Soares pregnant uterus         | 5243.3135 |
| 10795 | Z48314_s_at_NA_illumina        | MUC5B Mucin 5, subtype B,                      | 5244.9976 |
| 10796 | U05875_at_GI_5031782-S         | Clone pSK1 interferon gamma receptor           | 5245.8755 |
| 10797 | RC_AA045504_s_at_NA_illumina   | EST: zk61c05.s1 Soares pregnant uterus         | 5246.5894 |
| 10798 | D86976_at_GI_41281385-S        | KIAA0223 gene, partial cds                     | 5247.2197 |
| 10799 | RC_AA412548_at_NA_illumina     | EST: zu11b12.s1 Soares testis NHT Homo         | 5248.11   |
| 10800 | RC_AA621122_at_GI_44680112-S   | Chromosome 21 leucine-rich protein             | 5249.6733 |
| 10801 | D86981_at_GI_18104961-S        | KIAA0228 gene, partial cds                     | 5249.765  |
| 10802 | D86981_at-2_NA_illumina        | Human mRNA for KIAA0228 gene, partial          | 5249.765  |
| 10803 | RC_D60016_at_GI_29540556-A     | EST: Human fetal brain cDNA 3'-end GEN-        | 5250.204  |
| 10804 | L11329_at_GI_12707563-S        | DUAL SPECIFICITY PROTEIN                       | 5251.1104 |
| 10805 | RC_AA478794_at_GI_34335395-S   | EST: zv20e01.s1 Soares NhHMPu S1               | 5254.111  |
| 10806 | U43522_at_GI_27886587-A        | Protein tyrosine kinase PYK2 mRNA              | 5254.3945 |
| 10807 | RC_AA428211_at_NA_illumina     | EST: zw57c08.s1 Soares total fetus             | 5257.56   |
| 10808 | RC_AA489091_at_NA_illumina     | EST: aa56g08.s1 NCI_CGAP_GCB1                  | 5258.523  |
| 10809 | R89546_at_NA_illumina          | EST: yp97c11.r1 Homo sapiens cDNA              | 5260.1084 |
| 10810 | M29536_at_GI_29826334-S        | Translational initiation factor 2 beta subunit | 5261.598  |
| 10811 | RC_AA099397_at_GI_21071031-S   | Homo sapiens mRNA for 6.2 kd protein           | 5263.179  |
| 10812 | RC_AA101601_at_GI_5360209-S    | Homo sapiens herpesvirus entry protein B       | 5264.4507 |
| 10813 | RC_AA126429_at_GI_11386190-S   | Peroxisomal farnesylated protein               | 5264.8774 |
| 10814 | U60060_at_GI_17105402-A        | FEZ1 mRNA                                      | 5265.325  |
| 10815 | D81608_at_NA_illumina          | Polymerase (RNA) II (DNA directed)             | 5265.742  |
| 10816 | RC_AA291629_at_GI_44662835-S   | EST: zt45f05.s1 Soares ovary tumor             | 5265.9272 |
| 10817 | RC_AA478461_at_GI_31342353-S   | EST: zx12d04.s1 Soares total fetus             | 5267.0806 |
| 10818 | RC_AA127240_s_at_GI_31563525-  | EST: zl17g07.s1 Soares pregnant uterus         | 5268.536  |
| 10819 | U70321_at_GI_23200040-S        | Herpesvirus entry mediator mRNA                | 5269.1816 |
| 10820 | RC_AA598781_at_NA_illumina     | EST: ae38a11.s1 Gessler Wilms tumor            | 5271.824  |
| 10821 | RC_AA181720_at_NA_illumina     | Homo sapiens TRIAD1 type I mRNA,               | 5276.283  |
| 10822 | RC_AA430154_at_GI_14211890-S   | EST: zw59h08.s1 Soares total fetus             | 5278.508  |
| 10823 | RC_AA489798_at_NA_illumina     | EST: ab01g01.s1 Stratagene fetal retina        | 5279.191  |
| 10824 | RC_AA459265_f_at_GI_31543088-S | EST: aa27c10.s1 NCI_CGAP_GCB1                  | 5279.836  |

|       |                                |                                           |           |
|-------|--------------------------------|-------------------------------------------|-----------|
| 10825 | AB002365_at_GI_37539630-S      | KIAA0367 gene, partial cds                | 5281.4995 |
| 10826 | AA252436_at_GI_20302148-S      | Homo sapiens lysophospholipase (LPL1)     | 5282.6294 |
| 10827 | U01212_at_GI_5453827-S         | Olfactory marker protein (OMP) gene       | 5283.699  |
| 10828 | RC_AA112063_at_GI_41281652-I   | EST: zm63d04.s1 Stratagene fibroblast     | 5283.7915 |
| 10829 | X80754_at_GI_34305455-S        | GTP-binding protein                       | 5286.9644 |
| 10830 | RC_AA446655_at_NA_illumina     | EST: zw89g08.s1 Soares total fetus        | 5287.424  |
| 10831 | RC_AA019806_s_at_NA_illumina   | EST: ze61g04.s1 Soares retina N2b4HR      | 5287.8667 |
| 10832 | RC_AA453593_s_at_NA_illumina   | EST: zx45g01.s1 Soares testis NHT Homo    | 5290.3477 |
| 10833 | AA136353_at_NA_illumina        | EST: zk93b03.r1 Soares pregnant uterus    | 5290.823  |
| 10834 | RC_AA398572_at_GI_24308080-S   | EST: zt73g07.s1 Soares testis NHT Homo    | 5290.8667 |
| 10835 | RC_AA279215_at_NA_illumina     | EST: zs83f06.s1 NCI_CGAP_GCB1 Homo        | 5293.01   |
| 10836 | RC_AA283759_at_GI_24475987-S   | EST: zs48b05.s1 NCI_CGAP_GCB1             | 5294.257  |
| 10837 | W26187_at_NA_illumina          | 22a6 Human retina cDNA randomly           | 5294.7817 |
| 10838 | W49745_at_NA_illumina          | Homo sapiens FK506-binding protein        | 5298.8477 |
| 10839 | U89278_at_GI_37595529-A        | Polyhomeotic 2 homolog (HPH2) mRNA        | 5298.8525 |
| 10840 | RC_AA490930_at_NA_illumina     | EST: aa46e04.s1 NCI_CGAP_GCB1             | 5300.6978 |
| 10841 | M80651_at_GI_7657306-S         | Hum ORF (CEI5) mRNA, 3' flank             | 5301.025  |
| 10842 | AA193297_at_NA_illumina        | EST: zr39b08.r1 Soares NhHMPu S1          | 5302.152  |
| 10843 | L08069_at_GI_4504510-S         | DNAJ PROTEIN HOMOLOG 2                    | 5302.4414 |
| 10844 | AA194815_s_at_GI_9055283-S     | EST: zr35f03.r1 Soares NhHMPu S1          | 5302.453  |
| 10845 | AA484997_at_GI_21536460-S      | Manic fringe (Drosophila) homolog         | 5305.27   |
| 10846 | AA122242_at_GI_11038623-S      | Mannose-6-phosphate receptor (cation      | 5306.4766 |
| 10847 | M68516_rna1_at_GI_34147643-S   | PCI gene (plasminogen activator inhibitor | 5308.2876 |
| 10848 | U63842_at_GI_38455395-S        | Neurogenic basic-helix-loop-helix protein | 5309.051  |
| 10849 | RC_AA143329_at_NA_illumina     | EST: zo37h02.s1 Stratagene endothelial    | 5310.885  |
| 10850 | HG3523-HT4899_s_at_NA_illumina | Proto-Oncogene C-Myc, Alt. Splice 3, Orf  | 5311.66   |
| 10851 | RC_AA490318_s_at_GI_33186919-S | EST: aa51c06.s1 NCI_CGAP_GCB1             | 5311.982  |
| 10852 | U68063_at_GI_4759097-S         | Putative splice factor transformer2-beta  | 5313.8203 |
| 10853 | RC_AA279068_at_GI_41055004-S   | EST: zs82a03.s1 NCI_CGAP_GCB1             | 5314.802  |
| 10854 | RC_AA136660_i_at_NA_illumina   | EST: zk99a04.s1 Soares pregnant uterus    | 5315.57   |
| 10855 | Y08614_at_GI_8051634-S         | CRM1 protein                              | 5317.1494 |
| 10856 | RC_AA480109_r_at_GI_38158004-A | TYRO protein tyrosine kinase binding      | 5320.587  |
| 10857 | RC_AA434441_at_GI_40254910-S   | Frizzled (Drosophila) homolog 7           | 5321.184  |
| 10858 | RC_AA443716_at_GI_20149679-S   | EST: zw88c05.s1 Soares total fetus        | 5321.6997 |
| 10859 | RC_AA426324_at_NA_illumina     | EST: zw11h06.s1 Soares NhHMPu S1          | 5322.0483 |
| 10860 | RC_AA284777_at_NA_illumina     | EST: zt24b12.s1 Soares ovary tumor        | 5323.1133 |
| 10861 | RC_AA243052_at_NA_illumina     | EST: zr24h04.s1 Stratagene NT2 neuronal   | 5325.103  |
| 10862 | AFFX-                          | AFFX-HSAC07/X00351_M_st                   | 5326.0366 |
| 10863 | AFFX-HSAC07/X00351_M_st-       | No info for gene                          | 5326.0366 |
| 10864 | X13444_at_GI_27886632-A        | T-CELL SURFACE GLYCOPROTEIN CD8           | 5326.734  |
| 10865 | D87460_at_GI_4557041-S         | KIAA0270 gene, partial cds                | 5328.262  |
| 10866 | RC_AA026617_at_NA_illumina     | EST: ze93c06.s1 Soares fetal heart        | 5328.9897 |
| 10867 | RC_AA430057_at_NA_illumina     | EST: zw65h09.s1 Soares testis NHT         | 5329.5063 |

|       |                              |                                            |           |
|-------|------------------------------|--------------------------------------------|-----------|
| 10868 | RC_AA147719_at_GI_31377590-S | EST: zo44b06.s1 Stratagene endothelial     | 5329.715  |
| 10869 | H88035_s_at_GI_37059722-S    | Homo sapiens mRNA for KIAA0776             | 5330.241  |
| 10870 | AA059489_at_GI_7662650-S     | EST: zl96b08.r1 Stratagene corneal         | 5330.292  |
| 10871 | RC_AA235737_at_NA_illumina   | EST: zt32e03.s1 Soares ovary tumor         | 5330.8457 |
| 10872 | RC_AA053411_at_GI_33620744-S | Homo sapiens mRNA for KIAA0824             | 5331.3477 |
| 10873 | RC_AA487563_at_NA_illumina   | EST: ab23e08.s1 Stratagene lung            | 5332.0283 |
| 10874 | Z43594_at_NA_illumina        | EST: H. sapiens partial cDNA sequence;     | 5332.157  |
| 10875 | RC_AA481883_at_NA_illumina   | EST: zv41h12.s1 Soares ovary tumor         | 5333.522  |
| 10876 | RC_AA504144_at_NA_illumina   | EST: aa59e01.s1 NCI_CGAP_GCB1              | 5336.5923 |
| 10877 | RC_AA236950_at_GI_34147455-S | EST: zs43f01.s1 Soares NhHMPu S1           | 5337.0864 |
| 10878 | T31862_at_NA_illumina        | EST: EST40163 Homo sapiens cDNA 5'         | 5340.7866 |
| 10879 | U31383_at_NA_illumina        | G protein gamma-10 subunit mRNA            | 5343.7866 |
| 10880 | H88498_s_at_NA_illumina      | EST: yw21g12.r1 Homo sapiens cDNA          | 5344.4893 |
| 10881 | X74614_at_GI_24430179-S      | ODF2 (allele 2) gene for outer dense fiber | 5346.884  |
| 10882 | RC_AA398208_at_GI_24431995-S | EST: zt59b09.s1 Soares testis NHT Homo     | 5348.618  |
| 10883 | J04102_at_GI_20127471-S      | ETS2 V-ets avian erythroblastosis virus    | 5350.3613 |
| 10884 | AA092596_at_GI_42794770-A    | Bone morphogenetic protein 6               | 5357.4033 |
| 10885 | RC_AA052947_i_at_NA_illumina | EST: zl70d10.s1 Stratagene colon           | 5358.4966 |
| 10886 | RC_AA402272_at_GI_20544181-S | EST: zu48b11.s1 Soares ovary tumor         | 5358.777  |
| 10887 | D42041_at_NA_illumina        | KIAA0088 gene, partial cds                 | 5359.3853 |
| 10888 | X74794_at_GI_33469916-A      | CDC21 HOMOLOG                              | 5360.659  |
| 10889 | X74794_at-2_NA_illumina      | Minichromosome maintenance deficient       | 5360.659  |
| 10890 | H56267_at_NA_illumina        | EST: yq97d08.r1 Homo sapiens cDNA          | 5362.9077 |
| 10891 | RC_AA436705_at_GI_31982934-S | KIAA0766 gene product                      | 5363.1865 |
| 10892 | RC_AA100503_at_GI_7661695-S  | EST: zl81h09.s1 Stratagene colon           | 5367.2637 |
| 10893 | X98801_at_NA_illumina        | Dynactin                                   | 5368.741  |
| 10894 | AA430314_at_NA_illumina      | EST: zw68h06.r1 Soares testis NHT Homo     | 5369.1406 |
| 10895 | RC_AA063144_at_GI_13899246-S | EST: zf68a08.s1 Soares pineal gland        | 5370.231  |
| 10896 | RC_AA133681_at_NA_illumina   | Myosin phosphatase, target subunit 1       | 5371.0903 |
| 10897 | U82275_s_at_NA_illumina      | Homo sapiens leucocyte immunoglobulin-     | 5373.102  |
| 10898 | U77180_at_GI_22165424-S      | EBI1-ligand chemokine                      | 5375.5186 |
| 10899 | M20681_at_GI_5902089-S       | GLUCOSE TRANSPORTER TYPE 3,                | 5375.7812 |
| 10900 | W28839_at_NA_illumina        | KIAA0043 gene product                      | 5376.171  |
| 10901 | H45647_at_GI_20149602-S      | EST: yn97a10.r1 Homo sapiens cDNA          | 5377.346  |
| 10902 | D38305_at_GI_22035666-S      | Tob                                        | 5377.772  |
| 10903 | L00352_at_GI_8051613-S       | LOW-DENSITY LIPOPROTEIN                    | 5378.066  |
| 10904 | J05428_at_GI_4507824-S       | UDP-GLUCURONOSYLTRANSFERASE                | 5379.0093 |
| 10905 | RC_AA236559_at_NA_illumina   | EST: zs39e02.s1 Soares NhHMPu S1           | 5379.121  |
| 10906 | RC_AA428258_at_NA_illumina   | EST: zv84g01.s1 Soares total fetus         | 5379.2827 |
| 10907 | D31117_at_NA_illumina        | Ribosome binding protein 1 (dog 180kD      | 5380.664  |
| 10908 | RC_AA599219_at_NA_illumina   | EST: ag34c10.s1 Jia bone marrow stroma     | 5380.7324 |
| 10909 | AA127712_at_GI_35250772-S    | EST: zk89h10.r1 Soares pregnant uterus     | 5381.2954 |
| 10910 | HG1102-HT1102_at_NA_illumina | Ras-Related C3 Botulinum Toxin Substrate   | 5381.7573 |

|       |                              |                                           |           |
|-------|------------------------------|-------------------------------------------|-----------|
| 10911 | AA460047_at_NA_illumina      | EST: zx66b11.r1 Soares total fetus        | 5382.682  |
| 10912 | AA092290_f_at_NA_illumina    | EST: ll6470.seq.F Fetal heart, Lambda     | 5383.985  |
| 10913 | RC_AA130089_at_NA_illumina   | EST: zl33f12.s1 Soares pregnant uterus    | 5387.2827 |
| 10914 | RC_AA259064_at_GI_34222340-S | EST: zs30h09.s1 NCI_CGAP_GCB1             | 5389.399  |
| 10915 | AA419562_at_NA_illumina      | EST: zu99d04.r1 NCI_CGAP_GCB1 Homo        | 5389.682  |
| 10916 | AB002381_at_NA_illumina      | Human mRNA for KIAA0383 gene, partial     | 5389.8804 |
| 10917 | RC_AA454021_s_at_NA_illumina | EST: zx46d07.s1 Soares testis NHT Homo    | 5390.943  |
| 10918 | RC_D25718_at_NA_illumina     | EST: Human colon 3'directed Mbol cDNA,    | 5391.2505 |
| 10919 | M55150_at_GI_4557586-S       | FAH Fumarylacetoacetate                   | 5393.7554 |
| 10920 | AF009368_at_GI_38327637-S    | Luman mRNA                                | 5397.32   |
| 10921 | RC_AA430047_at_GI_9506670-S  | EST: zw65g09.s1 Soares testis NHT         | 5399.302  |
| 10922 | X79439_at_GI_4557798-S       | Notch 3 DNA sequence                      | 5400.843  |
| 10923 | C17704_at_GI_13569865-S      | EST: Human placenta cDNA 5'-end GEN-      | 5408.954  |
| 10924 | RC_AA393825_at_NA_illumina   | Homo sapiens mRNA for leptin receptor     | 5410.019  |
| 10925 | RC_AA235295_at_GI_20127599-S | EST: zs37c01.s1 Soares NhHMPu S1          | 5410.91   |
| 10926 | M57730_at_GI_33359679-A      | EPH-RELATED RECEPTOR TYROSINE             | 5411.2993 |
| 10927 | RC_AA226951_at_NA_illumina   | EST: zr19h06.s1 Stratagene NT2 neuronal   | 5411.774  |
| 10928 | D82534_at_GI_21536438-A      | Homo sapiens clone 23765 mRNA             | 5413.404  |
| 10929 | RC_AA234107_at_GI_31341428-S | EST: zs39g07.s1 Soares NhHMPu S1          | 5413.5015 |
| 10930 | AA479995_at_GI_28466996-S    | Discs, large (Drosophila) homolog 5       | 5413.521  |
| 10931 | RC_AA600158_at_NA_illumina   | EST: ae50e09.s1 Stratagene lung           | 5414.7    |
| 10932 | RC_AA029288_at_NA_illumina   | EST: zk10b03.s1 Soares pregnant uterus    | 5416.515  |
| 10933 | AA481982_f_at_GI_18640747-S  | EST: zv43g08.r1 Soares ovary tumor        | 5416.99   |
| 10934 | RC_AA478962_at_NA_illumina   | EST: zv18d05.s1 Soares NhHMPu S1          | 5422.8203 |
| 10935 | U19796_at-2_NA_illumina      | Human melanoma antigen p15 mRNA,          | 5423.551  |
| 10936 | U19796_at_GI_39812062-S      | Melanoma antigen p15 mRNA                 | 5423.551  |
| 10937 | M13929_s_at_NA_illumina      | MYC V-myc avian myelocytomatosis viral    | 5425.83   |
| 10938 | RC_AA470080_at_NA_illumina   | EST: zt98f05.s1 Soares testis NHT Homo    | 5427.0415 |
| 10939 | AA279550_at_GI_7706468-S     | EST: zs86b10.r1 NCI_CGAP_GCB1 Homo        | 5427.435  |
| 10940 | W70167_at_GI_22035595-S      | EST: zd52b01.r1 Soares fetal heart        | 5428.729  |
| 10941 | RC_AA236533_s_at_NA_illumina | Ecotropic viral integration site 1        | 5429.2197 |
| 10942 | X54304_at_GI_31543210-S      | Myosin regulatory light chain mRNA        | 5430.345  |
| 10943 | RC_AA436570_at_NA_illumina   | Homo sapiens mRNA for pre-mRNA            | 5431.6235 |
| 10944 | X03168_at_GI_18201910-S      | VTN Vitronectin (serum spreading factor,  | 5432.5176 |
| 10945 | U91932_at_GI_4502860-S       | Clathrin coat assembly protein-like       | 5432.9937 |
| 10946 | X64594_at_GI_4506522-S       | ERYTHROCYTE PLASMA MEMBRANE               | 5435.784  |
| 10947 | M93718_at_GI_40254421-S      | NOS3 Nitric oxide synthase 3 (endothelial | 5435.916  |
| 10948 | RC_AA350777_s_at_NA_illumina | EST: EST58220 Infant brain Homo           | 5436.5005 |
| 10949 | AA216094_s_at_GI_16554603-S  | EST: hp0453.seq.F Fetal heart, Lambda     | 5442.405  |
| 10950 | RC_AA379126_s_at_NA_illumina | EST: EST91932 Skin tumor I Homo           | 5444.298  |
| 10951 | T83496_at_NA_illumina        | EST: ye03d01.r1 Homo sapiens cDNA         | 5444.692  |
| 10952 | RC_AA428588_at_GI_8922115-S  | EST: zw74d07.s1 Soares testis NHT         | 5445.8643 |
| 10953 | Z35093_at_GI_19557683-S      | SURF1 Surfeit 1                           | 5447.8286 |

|       |                              |                                              |           |
|-------|------------------------------|----------------------------------------------|-----------|
| 10954 | U79666_s_at_NA_illumina      | Calcium channel, voltage-dependent, P/Q      | 5447.9873 |
| 10955 | AA397887_at_NA_illumina      | EST: zt86b12.r1 Soares testis NHT Homo       | 5448.751  |
| 10956 | RC_AA285167_at_GI_21536433-S | EST: zs48e12.s1 NCI_CGAP_GCB1                | 5449.638  |
| 10957 | U49395_at_GI_28416936-A      | Ionotropic ATP receptor P2X5a mRNA           | 5450.6606 |
| 10958 | RC_AA609674_at_GI_7705380-S  | Homo sapiens clone 23954 mRNA                | 5451.806  |
| 10959 | D86965_at_GI_7661997-S       | KIAA0210 gene                                | 5452.8853 |
| 10960 | U56418_at_GI_6041664-S       | Lysophosphatidic acid acyltransferase-       | 5453.3916 |
| 10961 | U28811_at_GI_6912389-S       | Cysteine-rich fibroblast growth factor       | 5454.6973 |
| 10962 | RC_AA412689_at_NA_illumina   | EST: zu12e03.s1 Soares testis NHT Homo       | 5458.002  |
| 10963 | M83221_at_GI_35493877-S      | TRANSCRIPTION FACTOR RELB                    | 5459.6895 |
| 10964 | HG4297-HT4567_at_NA_illumina | Transcriptional Coactivator Pc4              | 5460.2075 |
| 10965 | RC_AA279408_at_NA_illumina   | EST: zs84h09.s1 NCI_CGAP_GCB1                | 5464.1157 |
| 10966 | D80005_at_NA_illumina        | KIAA0183 gene, partial cds                   | 5465.8135 |
| 10967 | W76416_at_NA_illumina        | EST: zd61a06.r1 Soares fetal heart           | 5465.9077 |
| 10968 | AA450187_at_NA_illumina      | EST: zx42e12.r1 Soares total fetus           | 5466.0757 |
| 10969 | Y00081_s_at_NA_illumina      | IL6 Interleukin 6 (B cell stimulatory factor | 5470.478  |
| 10970 | D49738_at_GI_4502848-S       | Cytoskeleton associated protein (CG22)       | 5472.0117 |
| 10971 | RC_AA436471_at_NA_illumina   | EST: zv08e05.s1 Soares NhHMPu S1             | 5472.3076 |
| 10972 | W77734_at_NA_illumina        | EST: zd69a01.r1 Soares fetal heart           | 5472.8564 |
| 10973 | X03363_s_at_NA_illumina      | ERBB2 V-erb-b2 avian erythroblastic          | 5473.1094 |
| 10974 | L14778_s_at_GI_19923130-S    | PPP3CA Protein phosphatase 3 (formerly       | 5475.3286 |
| 10975 | RC_AA242766_at_NA_illumina   | EST: zr65d02.s1 Soares NhHMPu S1             | 5476.603  |
| 10976 | RC_AA151435_at_GI_32483375-S | EST: zl43h11.s1 Soares pregnant uterus       | 5476.715  |
| 10977 | AA364923_at_GI_37555943-S    | EST75602 Pineal gland II Homo sapiens        | 5479.4766 |
| 10978 | Y13492_s_at_NA_illumina      | Homo sapiens mRNA for smoothelin. (from      | 5479.904  |
| 10979 | AA461235_s_at_GI_18699723-S  | EST: zx61c05.r1 Soares total fetus           | 5480.398  |
| 10980 | D62584_at_GI_14916496-A      | Osteoglycin (osteoinductive factor)          | 5480.4883 |
| 10981 | U80040_at_GI_4501866-S       | ACO2 Aconitase 2, mitochondrial              | 5480.9175 |
| 10982 | R63011_at_NA_illumina        | Pleomorphic adenoma gene-like 1              | 5481.021  |
| 10983 | AA293400_at_GI_34222238-S    | EST: zt53e06.r1 Soares ovary tumor           | 5481.247  |
| 10984 | RC_AA284755_at_NA_illumina   | CDW52 antigen (CAMPATH-1 antigen)            | 5482.3403 |
| 10985 | RC_AA035577_at_GI_23111037-S | EST: zk26h03.s1 Soares pregnant uterus       | 5482.857  |
| 10986 | U45955_at_GI_32306537-S      | Neuronal membrane glycoprotein M6b           | 5483.905  |
| 10987 | RC_AA496914_at_NA_illumina   | Homo sapiens short form transcription        | 5485.376  |
| 10988 | R27358_at_GI_11037062-S      | EST: yh53d12.r1 Homo sapiens cDNA            | 5485.628  |
| 10989 | M81650_rna1_at_GI_38049013-A | Semenogelin I (SEMGI) gene                   | 5490.038  |
| 10990 | RC_AA191323_at_NA_illumina   | EST: zp83b09.s1 Stratagene HeLa cell s3      | 5490.468  |
| 10991 | RC_AA424006_at_NA_illumina   | EST: zv79h09.s1 Soares total fetus           | 5490.675  |
| 10992 | RC_AA609011_at_NA_illumina   | EST: af05f10.s1 Soares testis NHT Homo       | 5490.7695 |
| 10993 | RC_AA426113_at_GI_14150081-S | EST: zv52d09.s1 Soares testis NHT Homo       | 5491.581  |
| 10994 | U03891_at_GI_22907024-S      | Phorbolin I mRNA, partial cds                | 5494.7886 |
| 10995 | U03891_at-2_NA_illumina      | Phorbolin (similar to apolipoprotein B       | 5494.7886 |
| 10996 | X98085_at_GI_4507630-S       | TNR Tenascin R (restrictin, janusin)         | 5495.048  |



|       |                              |                                             |           |
|-------|------------------------------|---------------------------------------------|-----------|
| 10997 | RC_AA431479_at_NA_illumina   | EST: zw72f05.s1 Soares testis NHT Homo      | 5495.112  |
| 10998 | RC_AA031654_s_at_NA_illumina | EST: zk14d05.s1 Soares pregnant uterus      | 5497.4995 |
| 10999 | H66211_at_NA_illumina        | EST: yu16h09.r1 Homo sapiens cDNA           | 5498.446  |
| 11000 | U47101_at_NA_illumina        | NifU-like protein (hNifU) mRNA, partial cds | 5501.349  |
| 11001 | RC_AA148480_s_at_NA_illumina | Flavin containing monooxygenase 5           | 5508.7026 |
| 11002 | RC_AA421011_at_GI_21536309-A | EST: zu09a12.s1 Soares testis NHT Homo      | 5509.024  |
| 11003 | U34252_at_GI_25777738-S      | ALDH7 Aldehyde dehydrogenase 7              | 5510.985  |
| 11004 | W26376_at_GI_9845506-S       | Homo sapiens ornithine decarboxylase        | 5511.48   |
| 11005 | L28010_at_GI_14141150-S      | HnRNP F protein mRNA                        | 5515.43   |
| 11006 | W31287_at_GI_34147514-S      | EST: zb92a04.r1 Soares parathyroid tumor    | 5518.864  |
| 11007 | AA210883_s_at_NA_illumina    | Homo sapiens D13S106 mRNA for a             | 5523.095  |
| 11008 | RC_AA134968_at_GI_34147376-S | EST: zo23g08.s1 Stratagene colon            | 5523.1455 |
| 11009 | RC_AA279216_at_GI_25777620-A | EST: zs83f07.s1 NCI_CGAP_GCB1 Homo          | 5525.187  |
| 11010 | RC_AA258873_at_NA_illumina   | EST: zs34h10.s1 NCI_CGAP_GCB1               | 5526.178  |
| 11011 | AA446991_at_NA_illumina      | EST: zw90b08.r1 Soares total fetus          | 5526.668  |
| 11012 | RC_AA256184_at_NA_illumina   | EST: zr79d12.s1 Soares NhHMPu S1            | 5527.137  |
| 11013 | U12424_s_at_GI_4504084-S     | GPD2 Glycerol-3-phosphate                   | 5529.43   |
| 11014 | U12424_s_at-2_NA_illumina    | Glycerol-3-phosphate dehydrogenase 2        | 5529.43   |
| 11015 | RC_AA287097_at_NA_illumina   | EST: zs58e12.s1 NCI_CGAP_GCB1               | 5529.632  |
| 11016 | RC_AA621624_at_NA_illumina   | Homo sapiens clone 24515 mRNA               | 5534.1045 |
| 11017 | D87119_at_NA_illumina        | Cancellous bone osteoblast mRNA for         | 5536.576  |
| 11018 | RC_D59981_s_at_NA_illumina   | EST: Human fetal brain cDNA 3'-end GEN-     | 5539.9277 |
| 11019 | M80244_at_GI_34222350-S      | INTEGRAL MEMBRANE PROTEIN E16               | 5540.3022 |
| 11020 | AA431011_at_NA_illumina      | EST: PMY0900 KG1-a Lambda Zap               | 5542.977  |
| 11021 | RC_AA446597_at_NA_illumina   | EST: zw84f01.s1 Soares total fetus          | 5543.0815 |
| 11022 | D16611_s_at-2_NA_illumina    | Coproporphyrinogen oxidase                  | 5546.5776 |
| 11023 | D16611_s_at_NA_illumina      | CPO Coproporphyrinogen oxidase              | 5546.5776 |
| 11024 | RC_AA282138_at_NA_illumina   | EST: zt02a10.s1 NCI_CGAP_GCB1 Homo          | 5546.6626 |
| 11025 | U96915_at_GI_23510407-S      | Sin3 associated polypeptide p18 (SAP18)     | 5548.374  |
| 11026 | U12194_s_at_NA_illumina      | Sodium channel, voltage-gated, type I,      | 5552.211  |
| 11027 | RC_AA235303_at_GI_24475975-S | EST: zs37e07.s1 Soares NhHMPu S1            | 5553.15   |
| 11028 | M32304_s_at_GI_9257247-S     | TIMP2 Tissue inhibitor of                   | 5553.7456 |
| 11029 | U91985_at_GI_4758147-S       | DNA fragmentation factor-45 mRNA            | 5554.9023 |
| 11030 | U91985_at-2_NA_illumina      | DNA fragmentation factor, 45 kD, alpha      | 5554.9023 |
| 11031 | RC_AA403305_at_GI_42476160-S | EST: zt44e03.s1 Soares ovary tumor          | 5555.1963 |
| 11032 | D21853_at_NA_illumina        | EUKARYOTIC INITIATION FACTOR 4A-            | 5558.28   |
| 11033 | D87438_at_GI_39930344-S      | KIAA0251 gene, partial cds                  | 5559.1133 |
| 11034 | RC_AA019498_at_GI_21361862-S | EST: ze58g01.s1 Soares retina N2b4HR        | 5559.4287 |
| 11035 | RC_AA228116_at_NA_illumina   | Homo sapiens mRNA for KIAA0551              | 5560.346  |
| 11036 | AA285277_at_GI_30578409-S    | Homo sapiens brain expressed ring finger    | 5560.482  |
| 11037 | R77164_at_GI_33383230-A      | EST: yi65b04.r1 Homo sapiens cDNA           | 5563.616  |
| 11038 | RC_AA610024_at_NA_illumina   | EST: af18e07.s1 Soares testis NHT Homo      | 5563.6206 |
| 11039 | AA282702_at_NA_illumina      | EST: zt15d02.r1 NCI_CGAP_GCB1 Homo          | 5563.8984 |

|       |                                |                                             |           |
|-------|--------------------------------|---------------------------------------------|-----------|
| 11040 | L09708_at_GI_20631970-S        | C2 Complement component C2                  | 5564.291  |
| 11041 | RC_AA402720_at_GI_33563339-S   | EST: zu47e05.s1 Soares ovary tumor          | 5565.258  |
| 11042 | RC_AA424958_at_NA_illumina     | EST: zw03h03.s1 Soares NhHMPu S1            | 5567.944  |
| 11043 | RC_AA456080_at_GI_19747274-A   | EST: aa17c01.s1 Soares NhHMPu S1            | 5568.982  |
| 11044 | RC_AA432069_at_GI_20336331-A   | EST: zw89b06.s1 Soares total fetus          | 5569.878  |
| 11045 | RC_AA243303_at_NA_illumina     | EST: zr26h04.s1 Stratagene NT2 neuronal     | 5570.05   |
| 11046 | X57522_at_GI_24797159-S        | TAP1 Transporter 1, ABC (ATP binding        | 5572.262  |
| 11047 | H59417_s_at_NA_illumina        | EST: yr19h03.r1 Homo sapiens cDNA           | 5573.5884 |
| 11048 | C00337_at_GI_6005937-S         | EST: HUMGS0002430, Human Gene               | 5575.903  |
| 11049 | RC_AA398711_at_GI_31543911-S   | EST: zt75a05.s1 Soares testis NHT Homo      | 5576.1777 |
| 11050 | RC_AA456826_at_NA_illumina     | EST: aa38f01.s1 NCI_CGAP_GCB1 Homo          | 5576.9824 |
| 11051 | AA426168_at_GI_21902518-S      | Homo sapiens mRNA for KIAA0805              | 5579.793  |
| 11052 | U87281_s_at_NA_illumina        | Human hVps41p (hVPS41) mRNA,                | 5580.743  |
| 11053 | W26803_at_NA_illumina          | Erythrocyte membrane protein band 4.1-      | 5581.3184 |
| 11054 | AA481839_at_GI_15451913-S      | BAI1-associated protein 3                   | 5582.589  |
| 11055 | W16996_s_at_NA_illumina        | EST: zb09c07.r1 Soares fetal lung           | 5582.7554 |
| 11056 | L44538_at_NA_illumina          | EST: Homo sapiens thymus mRNA               | 5583.509  |
| 11057 | S82024_at_GI_34850060-S        | SCG10                                       | 5583.6533 |
| 11058 | RC_D51235_f_at_NA_illumina     | Tumor rejection antigen (gp96) 1            | 5587.0537 |
| 11059 | RC_AA620782_at_NA_illumina     | EST: af90f08.s1 Soares testis NHT Homo      | 5587.1484 |
| 11060 | L20316_at_GI_4503946-S         | GCGR Glucagon receptor                      | 5588.1104 |
| 11061 | X66079_at_GI_4507176-S         | SPIB Spi-B transcription factor (Spi-1/PU.1 | 5590.014  |
| 11062 | R22673_at_GI_7019336-S         | EST: yg08a04.r1 Homo sapiens cDNA           | 5591.71   |
| 11063 | RC_AA235799_s_at_GI_38201669-S | EST: zs42g04.s1 Soares NhHMPu S1            | 5593.5483 |
| 11064 | RC_AA233949_at_NA_illumina     | EST: zr27d05.s1 Stratagene NT2 neuronal     | 5593.967  |
| 11065 | AA444369_at_NA_illumina        | EST: zv76a09.r1 Soares total fetus          | 5595.708  |
| 11066 | RC_AA056208_at_GI_31342079-S   | EST: zf62g04.s1 Soares retina N2b4HR        | 5595.743  |
| 11067 | RC_AA450047_at_GI_7705295-A    | EST: zx35d03.s1 Soares total fetus          | 5597.9536 |
| 11068 | RC_AA279418_at_GI_21361660-S   | EST: zs85d07.s1 NCI_CGAP_GCB1               | 5598.1045 |
| 11069 | D82603_at_NA_illumina          | EST: similar to F26F4.1, mRNA sequence.     | 5598.16   |
| 11070 | AA292440_s_at_GI_9945331-S     | Homo sapiens negative growth-regulatory     | 5598.438  |
| 11071 | RC_AA064656_at_GI_24497626-A   | Homo sapiens GTPase-activating protein      | 5599.342  |
| 11072 | C16420_s_at_NA_illumina        | EST: Human aorta cDNA 5'-end GEN-           | 5599.498  |
| 11073 | RC_AA464598_at_GI_45237199-S   | EST: aa11f05.s1 Soares NhHMPu S1            | 5599.6675 |
| 11074 | RC_AA443271_at_GI_34787414-S   | EST: zw87e09.s1 Soares total fetus          | 5600.412  |
| 11075 | RC_AA417604_at_NA_illumina     | EST: zu99g07.s1 NCI_CGAP_GCB1               | 5602.299  |
| 11076 | D87292_at_GI_34335291-S        | Rhodanese                                   | 5603.56   |
| 11077 | AA374532_at_NA_illumina        | EST86676 HSC172 cells I Homo sapiens        | 5603.9487 |
| 11078 | M15182_at_GI_4504222-S         | GUSB Glucuronidase, beta                    | 5604.515  |
| 11079 | X51405_at_GI_4503008-S         | CPE Carboxypeptidase E                      | 5604.581  |
| 11080 | RC_AA280796_at_NA_illumina     | EST: zs97b09.s1 NCI_CGAP_GCB1               | 5609.478  |
| 11081 | M16038_at_GI_4505054-S         | LYN V-yes-1 Yamaguchi sarcoma viral         | 5609.4927 |
| 11082 | RC_AA598575_at_GI_13540554-S   | EST: ae35e11.s1 Gessler Wilms tumor         | 5609.861  |

|       |                                |                                          |           |
|-------|--------------------------------|------------------------------------------|-----------|
| 11083 | RC_AA280588_at_GI_31563502-A   | Homo sapiens mRNA for KIAA0784           | 5610.503  |
| 11084 | Z14982_rna1_at_GI_34335278-A   | MHC-encoded proteasome subunit gene      | 5611.4517 |
| 11085 | RC_AA147646_s_at_GI_40254863-  | EST: zl52g06.s1 Soares pregnant uterus   | 5614.7285 |
| 11086 | AA220223_at_NA_illumina        | Fibroblast growth factor receptor 2      | 5615.269  |
| 11087 | D10667_s_at_NA_illumina        | MYH11 Myosin, heavy polypeptide 11,      | 5617.7007 |
| 11088 | Z11697_at_GI_24475618-S        | CD83 ANTIGEN PRECURSOR                   | 5617.946  |
| 11089 | N95507_at_GI_34222347-S        | EST: yy62b11.r1 Homo sapiens cDNA        | 5619.0225 |
| 11090 | RC_AA488177_at_NA_illumina     | EST: ad08c03.s1 Soares NbHFB Homo        | 5620.1367 |
| 11091 | M36089_at-2_NA_illumina        | X-ray repair complementing defective     | 5622.591  |
| 11092 | M36089_at_GI_5454171-S         | DNA-REPAIR PROTEIN XRCC1                 | 5622.591  |
| 11093 | RC_AA234469_s_at_NA_illumina   | EST: zr74h07.s1 Soares NhHMPu S1         | 5625.135  |
| 11094 | RC_AA157537_at_NA_illumina     | EST: zo55e02.s1 Stratagene pancreas      | 5628.141  |
| 11095 | RC_AA253179_at_NA_illumina     | EST: zr53e08.s1 Soares NhHMPu S1         | 5629.877  |
| 11096 | RC_AA411795_at_NA_illumina     | EST: zt67d11.s1 Soares testis NHT Homo   | 5630.099  |
| 11097 | AB002300_at_GI_5902121-S       | Human mRNA for KIAA0302 gene, partial    | 5631.7056 |
| 11098 | RC_AA424813_at_NA_illumina     | EST: zw04b04.s1 Soares NhHMPu S1         | 5631.7817 |
| 11099 | RC_AA443683_at_GI_25306271-A   | EST: zw86c12.s1 Soares total fetus       | 5632.176  |
| 11100 | X74874_rna1_s_at_GI_14589948-S | RNA polymerase II largest subunit gene   | 5632.583  |
| 11101 | RC_AA291159_r_at_NA_illumina   | EST: zs46d03.s1 NCI_CGAP_GCB1            | 5633.236  |
| 11102 | RC_AA406319_at_GI_15451851-A   | Midline 1 (Opitz/BBB syndrome)           | 5633.4233 |
| 11103 | AB000220_at_GI_32307182-S      | Semaphorin E                             | 5635.8496 |
| 11104 | AA129373_at_NA_illumina        | EST: zn84h08.r1 Stratagene lung          | 5639.192  |
| 11105 | X61072_at_NA_illumina          | T cell receptor, clone IGRA17            | 5641.5723 |
| 11106 | X61072_at-2_NA_illumina        | Human mRNA for T cell receptor, clone    | 5641.5723 |
| 11107 | M96995_s_at_GI_45359857-S      | GRB2 Growth factor receptor-bound        | 5642.054  |
| 11108 | AA092129_f_at_NA_illumina      | EST: ll4505.seq.F Fetal heart, Lambda    | 5642.146  |
| 11109 | RC_AA156118_at_NA_illumina     | KIAA0469 gene product                    | 5643.459  |
| 11110 | RC_AA485223_at_NA_illumina     | EST: aa41b08.s1 NCI_CGAP_GCB1            | 5644.1787 |
| 11111 | RC_AA243139_at_NA_illumina     | EST: zs13h02.s1 NCI_CGAP_GCB1            | 5646.2583 |
| 11112 | J05036_s_at_GI_23110951-A      | CTSE Cathepsin E                         | 5646.595  |
| 11113 | RC_AA428364_s_at_NA_illumina   | EST: zw51f02.s1 Soares total fetus       | 5648.3945 |
| 11114 | U70735_at_GI_38027945-S        | 34 kDa Mov34 homolog mRNA                | 5650.367  |
| 11115 | RC_AA489102_at_NA_illumina     | EST: aa56h12.s1 NCI_CGAP_GCB1            | 5653.988  |
| 11116 | W28902_r_at_GI_7662271-S       | KIAA0736 gene product                    | 5654.048  |
| 11117 | RC_AA599986_at_GI_22027483-S   | EST: ag28h05.s1 Jia bone marrow stroma   | 5657.054  |
| 11118 | RC_AA600322_at_NA_illumina     | EST: ag04c07.s1 Gessler Wilms tumor      | 5659.196  |
| 11119 | M97936_at_NA_illumina          | SIGNAL TRANSDUCER AND                    | 5660.8804 |
| 11120 | AA352656_at_GI_20357594-S      | EST: EST60682 Activated T-cells XX       | 5661.8276 |
| 11121 | U09196_at_GI_10863968-S        | 1.1 kb mRNA upregulated in retinoic acid | 5662.5483 |
| 11122 | AA453917_at_NA_illumina        | EST: zx32f02.r1 Soares total fetus       | 5663.906  |
| 11123 | RC_AA443844_at_NA_illumina     | EST: zw88g09.s1 Soares total fetus       | 5665.547  |
| 11124 | D86983_at_NA_illumina          | KIAA0230 gene, partial cds               | 5666.8335 |
| 11125 | D86062_s_at-2_NA_illumina      | Human mRNA for KNP-1b, complete cds      | 5668.053  |

|       |                               |                                           |           |
|-------|-------------------------------|-------------------------------------------|-----------|
| 11126 | D86062_s_at_GI_38026959-A     | KNP-Ib                                    | 5668.053  |
| 11127 | RC_AA454019_at_NA_illumina    | EST: zx46d04.s1 Soares testis NHT Homo    | 5670.412  |
| 11128 | RC_AA125969_at_NA_illumina    | EST: zl85c04.s1 Stratagene colon          | 5671.6387 |
| 11129 | RC_AA410523_at_GI_19923620-S  | EST: zv16h06.s1 Soares NhHMPu S1          | 5673.182  |
| 11130 | RC_AA598589_at_NA_illumina    | EST: ae35g11.s1 Gessler Wilms tumor       | 5673.5137 |
| 11131 | RC_AA454159_at_GI_13899351-S  | EST: zx46f10.s1 Soares testis NHT Homo    | 5674.065  |
| 11132 | U79528_s_at_GI_22212935-A     | Sigma receptor mRNA                       | 5674.6636 |
| 11133 | RC_AA113165_at_NA_illumina    | EST: zm27d08.s1 Stratagene pancreas       | 5675.05   |
| 11134 | W38663_at_NA_illumina         | Galactokinase 1                           | 5675.069  |
| 11135 | M14539_at_GI_9961355-S        | COAGULATION FACTOR XIII A CHAIN           | 5681.249  |
| 11136 | W28235_at_NA_illumina         | EST: 43h8 Human retina cDNA randomly      | 5684.5366 |
| 11137 | D62965_at_GI_19923602-S       | EST: Human aorta cDNA 5'-end GEN-         | 5684.982  |
| 11138 | M92449_at_GI_30794501-S       | LTR mRNA, 3' end of coding region and 3'  | 5685.8384 |
| 11139 | D21254_s_at_NA_illumina       | Cadherin 11 (OB-cadherin, osteoblast)     | 5685.8496 |
| 11140 | RC_AA453456_at_GI_22749122-S  | EST: zx45b02.s1 Soares testis NHT Homo    | 5686.4355 |
| 11141 | RC_AA256943_s_at_NA_illumina  | EST: zr84c06.s1 Soares NhHMPu S1          | 5689.696  |
| 11142 | AA083339_at_GI_16418408-S     | EST: zn31d10.r1 Stratagene endothelial    | 5689.718  |
| 11143 | AA091278_at_GI_19923815-S     | EST: cchn2404.seq.F Fetal heart, Lambda   | 5689.7734 |
| 11144 | W25978_at_NA_illumina         | Cerebellar degeneration-related protein   | 5690.155  |
| 11145 | N56493_at_NA_illumina         | EST: JJ9988F Homo sapiens cDNA clone      | 5690.2856 |
| 11146 | RC_AA223184_at_GI_14916517-S  | EST: zr07h07.s1 Stratagene NT2 neuronal   | 5690.398  |
| 11147 | S80437_s_at_GI_41872630-S     | Fatty acid synthase {3' region} [human,   | 5692.0264 |
| 11148 | RC_AA609210_at_NA_illumina    | EST: af12f04.s1 Soares testis NHT Homo    | 5692.161  |
| 11149 | RC_AA609570_at_NA_illumina    | EST: af15b11.s1 Soares testis NHT Homo    | 5692.9907 |
| 11150 | RC_AA086071_at_NA_illumina    | EST: zn64b10.s1 Stratagene HeLa cell s3   | 5694.706  |
| 11151 | RC_AA193671_at_GI_21264593-A  | Homo sapiens mRNA for KIAA0580            | 5695.1543 |
| 11152 | AA306479_at_GI_13376426-S     | EST: EST177452 Jurkat T-cells VI Homo     | 5696.4463 |
| 11153 | RC_AA463630_s_at_NA_illumina  | Homo sapiens mRNA for KIAA0582            | 5697.6436 |
| 11154 | M99487_at_GI_4758397-S        | PROSTATE-SPECIFIC MEMBRANE                | 5698.306  |
| 11155 | RC_AA284721_s_at_GI_21361917- | EST: zt24a09.s1 Soares ovary tumor        | 5698.6123 |
| 11156 | AFFX-                         | AFFX-HUMTFRR/M11507_3_at                  | 5699.0527 |
| 11157 | AFFX-HUMTFRR/M11507_3_at-     | Transferrin receptor (p90, CD71)          | 5699.0527 |
| 11158 | RC_AA063070_at_NA_illumina    | EST: zf67e06.s1 Soares pineal gland       | 5700.934  |
| 11159 | T84004_at_NA_illumina         | H.sapiens PAP mRNA                        | 5702.5015 |
| 11160 | M37766_at_GI_21361570-S       | CD48 CD48 antigen (B-cell membrane        | 5703.435  |
| 11161 | U61734_s_at_NA_illumina       | (clone S31i125) mRNA, 3' end of cds       | 5704.533  |
| 11162 | M16653_at_GI_7705647-S        | Pancreatic elastase IIB mRNA              | 5706.454  |
| 11163 | RC_AA099832_at_NA_illumina    | EST: zk87e03.s1 Soares pregnant uterus    | 5706.494  |
| 11164 | RC_AA398205_at_NA_illumina    | EST: zt59b06.s1 Soares testis NHT Homo    | 5710.4517 |
| 11165 | RC_AA136547_at_GI_19528654-A  | EST: zn83c05.s1 Stratagene lung           | 5710.8486 |
| 11166 | RC_AA040369_at_GI_5454063-S   | Homo sapiens SYT interacting protein SIP  | 5712.138  |
| 11167 | X70218_at_GI_4506026-S        | PPP4C Protein phosphatase 4 (formerly     | 5714.2275 |
| 11168 | W03796_at_NA_illumina         | EST: za60c08.r1 Soares fetal liver spleen | 5716.5576 |

|       |                                |                                            |           |
|-------|--------------------------------|--------------------------------------------|-----------|
| 11169 | RC_D51370_at_NA_illumina       | EST: Human fetal brain cDNA 3'-end GEN-    | 5719.0415 |
| 11170 | D87017_cds3_at_NA_illumina     | C7 segment gene extracted from Human       | 5719.2705 |
| 11171 | RC_AA252372_at_GI_40018628-S   | EST: zs12f10.s1 NCI_CGAP_GCB1 Homo         | 5720.4927 |
| 11172 | M21154_at_GI_5209326-S         | AMD1 S-adenosylmethionine                  | 5722.5957 |
| 11173 | RC_AA280130_at_NA_illumina     | EST: zt09g03.s1 NCI_CGAP_GCB1 Homo         | 5723.229  |
| 11174 | RC_AA598831_f_at_GI_40255108-S | EST: ae40f06.s1 Gessler Wilms tumor        | 5725.737  |
| 11175 | Z46632_r_at_NA_illumina        | PDE4C Phosphodiesterase 4C, cAMP-          | 5730.595  |
| 11176 | AA418098_at_GI_21536277-S      | CAMP responsive element binding protein-   | 5739.3677 |
| 11177 | RC_AA465093_at_NA_illumina     | TIA1 cytotoxic granule-associated RNA-     | 5740.955  |
| 11178 | AA091737_at_NA_illumina        | M1637.seq.F Fetal heart, Lambda ZAP        | 5742.888  |
| 11179 | C00808_s_at_GI_24586662-S      | EST: HUMGS0003083, Human Gene              | 5743.9106 |
| 11180 | RC_AA236542_at_NA_illumina     | EST: zr75g11.s1 Soares NhHMPu S1           | 5744.585  |
| 11181 | RC_AA418007_at_NA_illumina     | EST: zv94f11.s1 Soares NhHMPu S1           | 5745.6045 |
| 11182 | RC_AA437118_at_GI_31542721-S   | EST: zv53d04.s1 Soares testis NHT Homo     | 5746.548  |
| 11183 | U51010_s_at_NA_illumina        | Nicotinamide N-methyltransferase gene,     | 5747.4707 |
| 11184 | L11669_at_GI_20127439-S        | Tetracycline transporter-like protein mRNA | 5749.1836 |
| 11185 | AJ001421_at_GI_19923786-S      | Rer1 protein                               | 5750.8193 |
| 11186 | Y10746_at_GI_21464114-A        | H.sapiens mRNA for protein containing      | 5751.584  |
| 11187 | D82558_at_GI_15743546-S        | Novel centrosomal protein RanBPM           | 5754.902  |
| 11188 | AA425230_at_NA_illumina        | Human GAP SH3 binding protein mRNA,        | 5755.797  |
| 11189 | AA243375_at_GI_5454099-S       | Homo sapiens TACC1 (TACC1) mRNA,           | 5755.802  |
| 11190 | RC_AA251982_at_NA_illumina     | Homo sapiens clone 23770 mRNA              | 5757.3604 |
| 11191 | AA055361_at_NA_illumina        | EST: zf20a04.r1 Soares fetal heart         | 5758.635  |
| 11192 | RC_AA193520_at_NA_illumina     | EST: zr41h04.s1 Soares NhHMPu S1           | 5759.9785 |
| 11193 | RC_AA458578_at_NA_illumina     | Homo sapiens KIAA0439 mRNA, partial        | 5760.356  |
| 11194 | AA047151_at_GI_17158002-S      | EST: zk74f05.r1 Soares pregnant uterus     | 5761.749  |
| 11195 | L40401_at_NA_illumina          | (clone zap128) mRNA, 3' end of cds         | 5762.6865 |
| 11196 | L40401_at-2_NA_illumina        | Homo sapiens (clone zap128) mRNA, 3'       | 5762.6865 |
| 11197 | RC_AA441978_at_NA_illumina     | EST: zw62g06.s1 Soares total fetus         | 5762.9165 |
| 11198 | U21049_at_NA_illumina          | DD96 mRNA                                  | 5763.7603 |
| 11199 | RC_AA134067_s_at_NA_illumina   | EST: zl29e07.s1 Soares pregnant uterus     | 5765.588  |
| 11200 | L33799_at_GI_7262388-S         | PCOLCE Procollagen C-endopeptidase         | 5770.326  |
| 11201 | RC_AA070437_at_NA_illumina     | Human smoothed mRNA, complete cds          | 5777.468  |
| 11202 | RC_AA398963_at_GI_34577103-S   | EST: zt86g01.s1 Soares testis NHT Homo     | 5778.582  |
| 11203 | RC_AA284879_at_GI_44889480-S   | Homo sapiens incomplete cDNA for a         | 5781.362  |
| 11204 | X98261_at-2_NA_illumina        | H.sapiens mRNA for M-phase                 | 5782.707  |
| 11205 | X98261_at_NA_illumina          | M-phase phosphoprotein, mpp5               | 5782.707  |
| 11206 | RC_AA621780_at_NA_illumina     | EST: af06f04.s1 Soares testis NHT Homo     | 5783.3843 |
| 11207 | RC_AA417569_i_at_NA_illumina   | EST: zv04e06.s1 Soares NhHMPu S1           | 5785.019  |
| 11208 | M19159_at_GI_13787194-S        | ALPP Alkaline phosphatase, placental       | 5785.0513 |
| 11209 | X07203_at_NA_illumina          | CD20 RECEPTOR                              | 5785.4595 |
| 11210 | N77574_i_at_GI_15812199-A      | Human DNA sequence from clone 341E18       | 5787.438  |
| 11211 | X91809_at_GI_5031704-S         | GAIP protein                               | 5787.9766 |

|       |                                |                                            |           |
|-------|--------------------------------|--------------------------------------------|-----------|
| 11212 | L20010_at_GI_4885402-S         | HCF1 gene related mRNA sequence            | 5788.237  |
| 11213 | RC_AA449269_at_GI_42476300-S   | KIAA0719 gene product                      | 5788.7793 |
| 11214 | X93920_at_GI_42764686-A        | Protein-tyrosine-phosphatase (tissue type: | 5788.9673 |
| 11215 | AA236412_at_GI_32189370-S      | EST: zr54g11.r1 Soares NhHMPu S1           | 5789.966  |
| 11216 | RC_AA478558_at_GI_41393590-S   | Apoptosis inhibitor 5                      | 5790.7314 |
| 11217 | AA043894_at_NA_illumina        | EST: zk57b05.r1 Soares pregnant uterus     | 5790.8    |
| 11218 | RC_AA281769_s_at_NA_illumina   | Human Hpast (HPAST) mRNA, complete         | 5791.1064 |
| 11219 | RC_AA450010_at_GI_8923696-S    | EST: zx33f04.s1 Soares total fetus         | 5791.8496 |
| 11220 | U41767_s_at_GI_11497001-S      | Metargidin precursor mRNA                  | 5792.247  |
| 11221 | R31641_at_GI_22749124-S        | EST: yh69e02.r1 Homo sapiens cDNA          | 5794.1665 |
| 11222 | RC_AA421049_at_NA_illumina     | EST: zu09f12.s1 Soares testis NHT Homo     | 5794.388  |
| 11223 | L77886_at_GI_18860901-S        | Protein tyrosine phosphatase mRNA          | 5795.6904 |
| 11224 | AA328994_at_NA_illumina        | EST: EST32547 Embryo, 12 week I Homo       | 5795.972  |
| 11225 | RC_AA418900_f_at_GI_17975758-A | EST: zw01g02.s1 Soares NhHMPu S1           | 5796.4263 |
| 11226 | T83237_at_GI_14149656-S        | Collagen, type I, alpha 1                  | 5797.0024 |
| 11227 | AA429228_at_GI_4557516-S       | EST: zw07c04.r1 Soares NhHMPu S1           | 5800.207  |
| 11228 | RC_AA454566_at_GI_31652223-A   | Ribosomal protein L13                      | 5800.31   |
| 11229 | RC_AA460666_at_NA_illumina     | EST: zx64c09.s1 Soares total fetus         | 5801.383  |
| 11230 | AA203321_at_NA_illumina        | EST: zx54c07.r1 Soares fetal liver spleen  | 5803.6196 |
| 11231 | RC_AA436560_at_GI_21536297-S   | EST: zv08e10.s1 Soares NhHMPu S1           | 5803.685  |
| 11232 | RC_AA460551_at_GI_38570053-S   | EST: zx68f11.s1 Soares total fetus         | 5807.8794 |
| 11233 | D38076_at_GI_6382077-S         | RANBP1 RAN binding protein 1               | 5809.8433 |
| 11234 | RC_AA478596_at_GI_31543977-S   | Homo sapiens mRNA for KIAA0854             | 5811.7466 |
| 11235 | AA455331_at_GI_33469944-A      | EST: aa30d12.r1 NCI_CGAP_GCB1              | 5814.948  |
| 11236 | AA031993_at_GI_4885648-S       | Homo sapiens HRIHFB2115 mRNA,              | 5816.1445 |
| 11237 | AA089559_at_GI_31742500-S      | Homo sapiens mRNA, chromosome 1            | 5817.001  |
| 11238 | AA340215_at_GI_13375694-S      | EST: EST45566 Fetal brain III Homo         | 5821.5635 |
| 11239 | RC_AA131466_at_NA_illumina     | EST: zl33f03.s1 Soares pregnant uterus     | 5822.5396 |
| 11240 | AA393432_s_at_NA_illumina      | EST: zt71a04.r1 Soares testis NHT Homo     | 5824.3057 |
| 11241 | RC_AA338760_at_GI_10092611-A   | EST: EST43763 Fetal brain I Homo           | 5824.702  |
| 11242 | C15160_at_NA_illumina          | Keratin 8                                  | 5826.004  |
| 11243 | U78678_at_GI_27436899-S        | Thioredoxin mRNA, nuclear gene             | 5826.603  |
| 11244 | U79254_at_GI_7262387-S         | Clone 23693 mRNA sequence                  | 5826.79   |
| 11245 | RC_AA457707_at_GI_33504488-S   | EST: zx87c05.s1 Soares ovary tumor         | 5826.9385 |
| 11246 | U77396_at_GI_4758913-S         | LPS-Induced TNF-Alpha Factor (LITAF)       | 5827.2075 |
| 11247 | RC_AA024661_at_GI_34147673-S   | EST: ze77h04.s1 Soares fetal heart         | 5828.13   |
| 11248 | RC_AA005370_at_GI_38569416-S   | EST: zh90g12.s1 Soares fetal liver spleen  | 5828.8677 |
| 11249 | RC_AA053134_at_NA_illumina     | Homo sapiens TRIAD1 type I mRNA,           | 5832.3105 |
| 11250 | RC_AA459944_at_NA_illumina     | EST: zx66a08.s1 Soares total fetus         | 5832.9604 |
| 11251 | RC_AA252900_at_GI_19882240-S   | EST: zr76f01.s1 Soares NhHMPu S1           | 5836.309  |
| 11252 | W80846_at_GI_31543930-S        | EST: zd83f05.r1 Soares fetal heart         | 5836.5195 |
| 11253 | M62994_at_GI_4503746-S         | Thyroid autoantigen (truncated actin-      | 5836.7163 |
| 11254 | RC_AA084104_at_NA_illumina     | EST: zn17h01.s1 Stratagene                 | 5838.769  |

|       |                              |                                             |           |
|-------|------------------------------|---------------------------------------------|-----------|
| 11255 | RC_AA053400_at_NA_illumina   | EST: zl71b04.s1 Stratagene colon            | 5839.4775 |
| 11256 | U52427_rna1_at_GI_4505946-S  | RNA polymerase II seventh subunit (rpb-7)   | 5841.198  |
| 11257 | RC_AA287131_at_NA_illumina   | Human NAD+-specific isocitrate              | 5843.222  |
| 11258 | W79153_s_at_NA_illumina      | EST: zd78d08.r1 Soares fetal heart          | 5844.8433 |
| 11259 | U79299_at_NA_illumina        | Neuronal olfactomedin-related ER            | 5846.2075 |
| 11260 | AB002559_at_GI_5902127-S     | Hunc18b2                                    | 5847.535  |
| 11261 | N39361_at_NA_illumina        | Homolog of mouse quaking QKI (KH            | 5848.1245 |
| 11262 | RC_AA476352_at_GI_22547170-A | EST: zw99e08.s1 Soares total fetus          | 5849.825  |
| 11263 | M58603_at_GI_34577121-S      | NFKB1 Nuclear factor of kappa light         | 5850.46   |
| 11264 | AA401850_at_NA_illumina      | Homo sapiens clone 23856 unknown            | 5850.606  |
| 11265 | RC_AA482546_s_at_NA_illumina | Human mRNA for KIAA0124 gene, partial       | 5854.0303 |
| 11266 | AA132328_at_NA_illumina      | EST: zo06d02.r1 Stratagene endothelial      | 5858.6665 |
| 11267 | RC_AA040154_at_GI_42766421-S | EST: zk47b01.s1 Soares pregnant uterus      | 5858.7134 |
| 11268 | RC_AA465194_at_NA_illumina   | EST: aa33g02.s1 NCI_CGAP_GCB1               | 5858.998  |
| 11269 | RC_AA243860_at_NA_illumina   | EST: zr68c04.s1 Soares NhHMPu S1            | 5859.359  |
| 11270 | RC_AA489655_f_at_NA_illumina | EST: aa43e12.s1 Soares NhHMPu S1            | 5860.04   |
| 11271 | RC_AA235688_at_NA_illumina   | EST: zt32d08.s1 Soares ovary tumor          | 5861.35   |
| 11272 | RC_AA477252_at_GI_40254858-S | Homo sapiens mRNA for KIAA0664              | 5861.861  |
| 11273 | RC_AA293719_at_GI_24308433-S | EST: zt55h03.s1 Soares ovary tumor          | 5862.125  |
| 11274 | RC_AA406352_s_at_NA_illumina | EST: zv10a12.s1 Soares NhHMPu S1            | 5862.4272 |
| 11275 | D79996_at_GI_41281488-S      | KIAA0174 gene                               | 5862.627  |
| 11276 | AA310510_at_GI_8393258-S     | Human mRNA expressed in HC/HCC              | 5863.2275 |
| 11277 | U16660_at_GI_4503446-S       | Peroxisomal enoyl-CoA hydratase-like        | 5863.9463 |
| 11278 | RC_AA490214_at_GI_31542761-S | EST: aa45g12.s1 Soares NhHMPu S1            | 5867.758  |
| 11279 | AA234663_at_GI_8923578-S     | EST: zs39a07.r1 Soares NhHMPu S1            | 5869.541  |
| 11280 | AA019475_at_NA_illumina      | EST: ze57c01.r1 Soares retina N2b4HR        | 5870.916  |
| 11281 | C01397_at_GI_22748948-S      | EST: HUMGS0008379, Human Gene               | 5870.9937 |
| 11282 | RC_AA490605_at_GI_37693523-S | KIAA0569 gene product                       | 5872.4736 |
| 11283 | X69819_at_GI_12545399-S      | ICAM3 Intercellular adhesion molecule 3     | 5874.036  |
| 11284 | U12707_s_at_GI_4507908-S     | WAS Wiskott-Aldrich syndrome (eczema-       | 5876.7993 |
| 11285 | X82207_at_GI_13325060-S      | BETA-CENTRACTIN                             | 5878.3823 |
| 11286 | X82207_at-2_NA_illumina      | BETA-CENTRACTIN                             | 5878.3823 |
| 11287 | AA165312_at_NA_illumina      | EST: zo95h11.r1 Stratagene ovarian          | 5878.432  |
| 11288 | RC_AA236018_at_NA_illumina   | EST: zs05b10.s1 NCI_CGAP_GCB1               | 5878.86   |
| 11289 | L05144_at_GI_32483400-S      | PCK1 Phosphoenolpyruvate                    | 5881.144  |
| 11290 | T10792_at_GI_7706562-S       | EST: hbc1281 Homo sapiens cDNA clone        | 5882.098  |
| 11291 | J04444_at_GI_21359866-S      | CYC1 Cytochrome c-1                         | 5882.897  |
| 11292 | U29195_at_GI_28195383-S      | NPTX2 Neuronal pentraxin II                 | 5883.669  |
| 11293 | T57738_at_NA_illumina        | EST: yc01d08.r1 Homo sapiens cDNA           | 5884.6875 |
| 11294 | RC_AA223209_at_NA_illumina   | EST: zr06c11.s1 Stratagene NT2 neuronal     | 5885.1626 |
| 11295 | W26915_s_at_GI_18373333-S    | Eukaryotic translation initiation factor 2, | 5885.4673 |
| 11296 | RC_AA398598_at_GI_7019450-S  | EST: zt70a07.s1 Soares testis NHT Homo      | 5887.0977 |
| 11297 | RC_AA034925_at_GI_14043023-S | EST: zk25e01.s1 Soares pregnant uterus      | 5887.21   |

|       |                               |                                         |           |
|-------|-------------------------------|-----------------------------------------|-----------|
| 11298 | RC_AA024482_at_GI_27894340-A  | EST: ze76a01.s1 Soares fetal heart      | 5887.546  |
| 11299 | U52112_rna1_at_GI_13435352-A  | L1CAM gene (neural cell adhesion        | 5888.972  |
| 11300 | AA203707_at_NA_illumina       | Splicing factor proline/glutamine rich  | 5891.539  |
| 11301 | U20285_at_GI_13435380-S       | Gps1 (GPS1) mRNA                        | 5891.7095 |
| 11302 | RC_AA598872_at_GI_8922653-S   | EST: ae37b10.s1 Gessler Wilms tumor     | 5894.492  |
| 11303 | X07696_at_GI_24430189-S       | KRT15 Keratin 15                        | 5898.255  |
| 11304 | U07806_s_at_NA_illumina       | TOP1 DNA topoisomerase I                | 5898.3506 |
| 11305 | RC_AA423841_f_at_NA_illumina  | Homo sapiens clone 23856 unknown        | 5900.0283 |
| 11306 | D29954_at_NA_illumina         | HYPOTHETICAL MYELOID CELL LINE          | 5903.634  |
| 11307 | D30949_at_NA_illumina         | EST: Human fetal-lung cDNA 5'-end       | 5906.358  |
| 11308 | AF000237_s_at_NA_illumina     | Homo sapiens lysophosphatidic acid      | 5906.467  |
| 11309 | RC_AA455967_at_NA_illumina    | Neuronal PAS domain protein 2           | 5908.005  |
| 11310 | RC_AA430106_at_GI_7706155-S   | EST: zw61a09.s1 Soares total fetus      | 5908.133  |
| 11311 | RC_AA431799_at_NA_illumina    | EST: zw80h06.s1 Soares testis NHT       | 5908.3193 |
| 11312 | RC_AA453614_i_at_NA_illumina  | Homo sapiens mRNA for KIAA0776          | 5910.2275 |
| 11313 | AA404252_at_NA_illumina       | Human mannose-specific lectin (MR60)    | 5910.408  |
| 11314 | RC_AA452141_at_GI_31542757-S  | EST: zx29a09.s1 Soares total fetus      | 5910.999  |
| 11315 | RC_AA435748_at_NA_illumina    | EST: zt79e05.s1 Soares testis NHT Homo  | 5911.0444 |
| 11316 | AA092765_at_GI_9507032-S      | EST: ll8569.seq.F Fetal heart, Lambda   | 5913.0054 |
| 11317 | RC_AA479892_at_NA_illumina    | EST: zw44b02.s1 Soares total fetus      | 5913.1445 |
| 11318 | RC_AA430673_at_NA_illumina    | EST: zw26d11.s1 Soares ovary tumor      | 5914.2305 |
| 11319 | M55047_at_GI_5032138-S        | SYNAPTOTAGMIN I                         | 5917.2764 |
| 11320 | RC_AA031814_at_NA_illumina    | EST: zk17g04.s1 Soares pregnant uterus  | 5918.1    |
| 11321 | Z11793_at_GI_4885590-S        | Selenoprotein P                         | 5919.9204 |
| 11322 | RC_AA609436_at_NA_illumina    | EST: zu72e05.s1 Soares testis NHT Homo  | 5922.017  |
| 11323 | RC_AA449076_at_NA_illumina    | EST: zx06a12.s1 Soares total fetus      | 5922.8193 |
| 11324 | U52828_s_at_GI_36951195-S     | Delta-catenin mRNA, partial cds         | 5925.245  |
| 11325 | RC_AA283935_at_NA_illumina    | EST: zs48g01.s1 NCI_CGAP_GCB1           | 5928.158  |
| 11326 | AA306911_at_GI_24475981-S     | EST: EST178043 Colon carcinoma (HCC)    | 5931.4517 |
| 11327 | RC_AA424530_s_at_GI_18379343- | EST: zv91a02.s1 Soares NhHMPu S1        | 5932.742  |
| 11328 | X74008_at_GI_4506006-S        | PPP1CC Protein phosphatase 1, catalytic | 5933.744  |
| 11329 | RC_AA037803_at_GI_4826741-S   | Glutamine-fructose-6-phosphate          | 5936.073  |
| 11330 | M61832_s_at_GI_9951914-S      | AHCY S-adenosylhomocysteine hydrolase   | 5938.568  |
| 11331 | U37518_at_GI_23510439-S       | TNF-related apoptosis inducing ligand   | 5939.9004 |
| 11332 | U01691_s_at_GI_4809273-S      | Annexin V (ANX5) gene, 5'-untranslated  | 5940.0464 |
| 11333 | RC_AA446944_at_GI_7705317-S   | EST: zw85c11.s1 Soares total fetus      | 5944.4927 |
| 11334 | RC_AA398255_at_NA_illumina    | EST: zt60a06.s1 Soares testis NHT Homo  | 5945.0815 |
| 11335 | RC_AA455146_at_NA_illumina    | EST: zx78e08.s1 Soares ovary tumor      | 5945.2124 |
| 11336 | C01714_at_NA_illumina         | Homo sapiens serum-inducible kinase     | 5945.69   |
| 11337 | RC_AA253000_at_GI_34878803-S  | EST: zr52h04.s1 Soares NhHMPu S1        | 5945.8535 |
| 11338 | RC_AA600125_at_GI_41281611-S  | EST: ae50b04.s1 Stratagene lung         | 5947.7227 |
| 11339 | U26726_at_GI_31542940-S       | 11 beta-hydroxysteroid dehydrogenase    | 5948.5947 |
| 11340 | RC_AA421715_at_NA_illumina    | EST: zu24b05.s1 Soares NhHMPu S1        | 5949.5312 |



|       |                               |                                             |           |
|-------|-------------------------------|---------------------------------------------|-----------|
| 11341 | RC_C14891_at_NA_illumina      | Homo sapiens mRNA for KIAA0856              | 5950.0107 |
| 11342 | W69964_at_NA_illumina         | Homo sapiens mRNA, chromosome 1             | 5956.9297 |
| 11343 | RC_AA156565_at_GI_4505398-S   | 4-nitrophenylphosphatase domain and non-    | 5956.979  |
| 11344 | RC_AA465240_at_NA_illumina    | EST: aa24h03.s1 NCI_CGAP_GCB1               | 5958.7017 |
| 11345 | H88706_s_at_NA_illumina       | EST: yw23e08.r1 Homo sapiens cDNA           | 5964.938  |
| 11346 | W75976_at_NA_illumina         | EST: zd58d02.r1 Soares fetal heart          | 5968.333  |
| 11347 | X14850_at_GI_4504252-S        | HISTONE H2A.X                               | 5968.7812 |
| 11348 | N98656_s_at_GI_7657610-S      | Homo sapiens SPF31 (SPF31) mRNA,            | 5969.381  |
| 11349 | RC_AA101878_at_GI_21314667-S  | EST: zk85f07.s1 Soares pregnant uterus      | 5969.592  |
| 11350 | RC_AA406218_at_NA_illumina    | EST: zu65e08.s1 Soares testis NHT Homo      | 5970.7646 |
| 11351 | RC_AA398469_at_GI_40805834-S  | EST: zt62f06.s1 Soares testis NHT Homo      | 5971.9487 |
| 11352 | AA314457_at_GI_9910383-S      | EST: EST186294 Colon carcinoma (HCC)        | 5972.443  |
| 11353 | M55067_at_GI_4557784-S        | NCF1 47 kD autosomal chronic                | 5972.9727 |
| 11354 | RC_AA621325_at_GI_20127466-S  | HNK-1 sulfotransferase                      | 5973.683  |
| 11355 | RC_AA609168_at_GI_21361764-S  | EST: af12a10.s1 Soares testis NHT Homo      | 5973.8174 |
| 11356 | AA094800_at_GI_23238220-S     | Eukaryotic translation initiation factor 3, | 5976.571  |
| 11357 | L08835_rna2_s_at_GI_4758173-S | DM kinase gene (myotonic dystrophy          | 5978.363  |
| 11358 | D87466_at_NA_illumina         | KIAA0276 gene, partial cds                  | 5980.867  |
| 11359 | D87466_at-2_NA_illumina       | Human mRNA for KIAA0276 gene, partial       | 5980.867  |
| 11360 | RC_C14199_at_GI_7662167-S     | KIAA0535 gene product                       | 5981.0283 |
| 11361 | RC_AA465214_at_GI_18034689-S  | EST: aa24e06.s1 NCI_CGAP_GCB1               | 5981.1196 |
| 11362 | D28114_at-2_NA_illumina       | Human mRNA for MOBP (myelin-                | 5981.339  |
| 11363 | D28114_at_GI_5729930-A        | MOBP Myelin-associated oligodendrocytic     | 5981.339  |
| 11364 | RC_AA293533_i_at_NA_illumina  | EST: zt54g04.s1 Soares ovary tumor          | 5981.835  |
| 11365 | RC_AA598417_at_NA_illumina    | EST: ae48c06.s1 Stratagene lung             | 5981.9185 |
| 11366 | RC_AA053969_at_NA_illumina    | EST: ze75h06.s1 Soares fetal heart          | 5984.672  |
| 11367 | L39874_at_GI_4503276-S        | DCTD Deoxycytidylate deaminase              | 5988.482  |
| 11368 | M93056_at_GI_20149554-S       | LEUKOCYTE ELASTASE INHIBITOR                | 5988.9946 |
| 11369 | W27237_at_NA_illumina         | EST: 24c11 Human retina cDNA randomly       | 5989.355  |
| 11370 | RC_AA227986_at_GI_40255207-S  | EST: zr58c12.s1 Soares NhHMPu S1            | 5992.0103 |
| 11371 | D87433_at_GI_12225239-S       | KIAA0246 gene, partial cds                  | 5993.2344 |
| 11372 | RC_AA449238_i_at_NA_illumina  | EST: zx04b11.s1 Soares total fetus          | 5994.884  |
| 11373 | AA194808_s_at_NA_illumina     | EST: zr35d03.r1 Soares NhHMPu S1            | 5996.0415 |
| 11374 | U15197_at_GI_9994164-S        | ABO ABO blood group (transferase A,         | 5997.1343 |
| 11375 | U15197_at-2_NA_illumina       | ABO blood group (transferase A, alpha 1-3-  | 5997.1343 |
| 11376 | RC_AA599759_at_NA_illumina    | Human DNA sequence from clone 465N24        | 5998.0327 |
| 11377 | L12350_at_GI_40317627-S       | THBS2 Thrombospondin 2                      | 6001.3457 |
| 11378 | RC_AA007214_at_NA_illumina    | EST: 13cDNA52-3.seq Soares infant brain     | 6003.0044 |
| 11379 | S69265_s_at_GI_5231299-S      | Neuron-specific RNA recognition motifs      | 6003.1934 |
| 11380 | RC_AA029462_at_NA_illumina    | EST: ze96g03.s1 Soares fetal heart          | 6005.1504 |
| 11381 | RC_AA505136_at_NA_illumina    | EST: aa65d11.s1 NCI_CGAP_GCB1               | 6009.63   |
| 11382 | RC_AA412420_at_NA_illumina    | EST: zt99g11.s1 Soares testis NHT Homo      | 6012.7373 |
| 11383 | RC_AA461302_at_GI_24371259-S  | EST: zx65a10.s1 Soares total fetus          | 6013.476  |

|       |                              |                                             |           |
|-------|------------------------------|---------------------------------------------|-----------|
| 11384 | M63180_at-2_NA_illumina      | Threonyl-tRNA synthetase                    | 6013.713  |
| 11385 | M63180_at_GI_38202254-S      | TARS Threonyl-tRNA synthetase               | 6013.713  |
| 11386 | RC_AA489203_at_NA_illumina   | Homo sapiens mRNA for KIAA0896              | 6016.3774 |
| 11387 | D87074_at_GI_7662015-S       | KIAA0237 gene                               | 6017.9463 |
| 11388 | RC_AA486418_at_NA_illumina   | EST: ab36c09.s1 Stratagene HeLa cell s3     | 6019.8667 |
| 11389 | M55531_at_GI_4507012-S       | SLC2A5 Solute carrier family 2 (facilitated | 6020.6333 |
| 11390 | T67231_at_GI_4506864-S       | Succinate dehydrogenase complex,            | 6020.8613 |
| 11391 | RC_AA454631_at_GI_19718745-A | SFRS protein kinase 1                       | 6021.856  |
| 11392 | AA471278_at_NA_illumina      | BUB3 (budding uninhibited by                | 6021.8623 |
| 11393 | U19977_at_GI_4502998-S       | Preprocarboxypeptidase A2 (proCPA2)         | 6024.1514 |
| 11394 | RC_AA429655_at_GI_29725621-S | EST: zw71d04.s1 Soares testis NHT           | 6026.3164 |
| 11395 | M54995_at_GI_41872408-S      | PPBP Connective tissue activation peptide   | 6027.21   |
| 11396 | W58709_at_GI_24797090-A      | PHD finger protein 2                        | 6027.437  |
| 11397 | AA046865_at_GI_27734739-S    | EST: zf12b09.r1 Soares fetal heart          | 6027.961  |
| 11398 | RC_AA027086_at_GI_6912487-S  | Collagen, type I, alpha 2                   | 6027.9634 |
| 11399 | H52836_at_GI_33695100-A      | Yo22e10.r1 Homo sapiens cDNA clone          | 6029.0913 |
| 11400 | RC_AA481060_at_NA_illumina   | EST: aa29e02.s1 NCI_CGAP_GCB1               | 6029.1284 |
| 11401 | D87463_at_GI_41281475-S      | KIAA0273 gene                               | 6030.817  |
| 11402 | U53209_at_GI_33620726-S      | Transformer-2 alpha (htra-2 alpha) mRNA     | 6030.9897 |
| 11403 | RC_AA402968_at_NA_illumina   | EST: zu54b12.s1 Soares ovary tumor          | 6032.396  |
| 11404 | D83777_at_GI_28461170-S      | KIAA0193 gene                               | 6033.535  |
| 11405 | RC_AA018346_at_GI_34335286-A | EST: ze41d12.s1 Soares retina N2b4HR        | 6034.008  |
| 11406 | AB002301_at_NA_illumina      | Human mRNA for KIAA0303 gene, partial       | 6036.4175 |
| 11407 | L11285_at_GI_21614527-S      | DUAL SPECIFICITY MITOGEN-                   | 6036.769  |
| 11408 | RC_AA478416_at_NA_illumina   | EST: zu46d07.s1 Soares ovary tumor          | 6037.632  |
| 11409 | W60181_at_NA_illumina        | P311 protein                                | 6044.8267 |
| 11410 | AA247450_at_NA_illumina      | EST: csg2873.seq.F Human fetal heart,       | 6047.0806 |
| 11411 | AA070671_at_GI_7706132-S     | Oxidase (cytochrome c) assembly 1-like      | 6048.1685 |
| 11412 | RC_AA450351_at_NA_illumina   | EST: zx04h08.s1 Soares total fetus          | 6053.0024 |
| 11413 | RC_AA454618_at_GI_42519910-S | Homo sapiens clone 23625 mRNA               | 6053.413  |
| 11414 | AA037192_at_NA_illumina      | Dual specificity phosphatase 3 (vaccinia    | 6053.6694 |
| 11415 | AA418618_at_NA_illumina      | EST: zv93c03.r1 Soares NhHMPu S1            | 6055.1045 |
| 11416 | Z83336_at_NA_illumina        | HH2B/d gene                                 | 6055.8506 |
| 11417 | RC_AA400184_at_GI_7662371-S  | Homo sapiens mRNA for KIAA0907              | 6057.3643 |
| 11418 | AF004292_at_GI_45120110-S    | Homo sapiens clone IMAGE:30181 mRNA         | 6057.8403 |
| 11419 | D38048_at_GI_23110926-S      | Proteasome subunit z                        | 6060.5815 |
| 11420 | RC_AA285162_at_NA_illumina   | EST: zs48e06.s1 NCI_CGAP_GCB1               | 6060.9375 |
| 11421 | U07620_at_GI_20986507-A      | JNK3 alpha2 protein kinase (JNK3A2)         | 6062.5605 |
| 11422 | U07620_at-2_NA_illumina      | Protein kinase mitogen-activated 10 (MAP    | 6062.5605 |
| 11423 | H19089_at_NA_illumina        | EST: yn51f04.r1 Homo sapiens cDNA           | 6071.221  |
| 11424 | D86988_at_GI_18375672-S      | KIAA0221 gene                               | 6071.794  |
| 11425 | AA401047_at_NA_illumina      | Homo sapiens mRNA for neuropsin,            | 6075.891  |
| 11426 | U29171_at_GI_20544143-A      | CSNK1D Casein kinase 1, delta               | 6077.092  |

|       |                                |                                           |           |
|-------|--------------------------------|-------------------------------------------|-----------|
| 11427 | RC_AA236388_at_GI_38683806-S   | EST: zr72c08.s1 Soares NhHMPu S1          | 6077.7476 |
| 11428 | RC_AA463712_at_GI_5902011-S    | EST: aa07d06.s1 Soares NhHMPu S1          | 6079.2183 |
| 11429 | J04177_at_GI_18375521-A        | COL11A1 Collagen, type XI, alpha 1        | 6081.7603 |
| 11430 | AB001325_at_GI_22165421-S      | AQP3 Aquaporin 3                          | 6085.8457 |
| 11431 | C00314_at_NA_illumina          | EST: HUMGS0006018, Human Gene             | 6087.414  |
| 11432 | W27873_at_NA_illumina          | Human skeletal muscle 1.3 kb mRNA for     | 6088.9316 |
| 11433 | RC_AA243173_at_NA_illumina     | EST: zr26d11.s1 Stratagene NT2 neuronal   | 6089.166  |
| 11434 | RC_AA430127_at_NA_illumina     | EST: zw61d01.s1 Soares total fetus        | 6092.3877 |
| 11435 | D49817_at-2_NA_illumina        | Homo sapiens mRNA for 6-phosphofructo-    | 6094.4478 |
| 11436 | D49817_at_GI_4758899-S         | Fructose 6-phosphate,2-kinase/fructose    | 6094.4478 |
| 11437 | RC_AA021592_at_NA_illumina     | EST: ze67c01.s1 Soares retina N2b4HR      | 6095.7056 |
| 11438 | AA393666_at_NA_illumina        | Mannose-6-phosphate receptor (cation      | 6096.1445 |
| 11439 | RC_AA485115_at_NA_illumina     | KIAA0793 gene product                     | 6096.3555 |
| 11440 | D50915_at_GI_20302136-S        | KIAA0125 gene                             | 6096.882  |
| 11441 | HG3945-HT4215_at_NA_illumina   | Phospholipid Transfer Protein             | 6098.604  |
| 11442 | AA095424_at_NA_illumina        | EST: l4639.seq.F Fetal heart, Lambda      | 6098.6543 |
| 11443 | Z37987_s_at_NA_illumina        | EEF1A1 Translation elongation factor 1-   | 6101.4263 |
| 11444 | RC_AA034202_at_GI_16554605-S   | EST: zk21c03.s1 Soares pregnant uterus    | 6101.737  |
| 11445 | U12779_at_GI_32481208-A        | MAP KINASE-ACTIVATED PROTEIN              | 6102.194  |
| 11446 | RC_AA478463_at_GI_21536456-S   | EST: zx12d06.s1 Soares total fetus        | 6102.276  |
| 11447 | RC_AA232576_at_NA_illumina     | EST: zr45d09.s1 Soares NhHMPu S1          | 6102.3003 |
| 11448 | AFFX-M27830_3_at-2_NA_illumina | Human 28S ribosomal RNA gene,             | 6102.745  |
| 11449 | AFFX-M27830_3_at_NA_illumina   | AFFX-M27830_3_at (endogenous control)     | 6102.745  |
| 11450 | U56417_at_GI_26787963-A        | Lysophosphatidic acid acyltransferase-    | 6102.787  |
| 11451 | RC_AA425378_i_at_NA_illumina   | Homo sapiens mRNA containing (CAG)4       | 6105.0117 |
| 11452 | RC_AA435840_at_NA_illumina     | High-mobility group (nonhistone           | 6105.484  |
| 11453 | M73547_at_NA_illumina          | POLYPOSIS LOCUS PROTEIN 1                 | 6106.4224 |
| 11454 | RC_AA262111_at_NA_illumina     | EST: zs21f07.s1 NCI_CGAP_GCB1 Homo        | 6107.4043 |
| 11455 | RC_AA436615_at_NA_illumina     | EST: zw55c09.s1 Soares total fetus        | 6107.9985 |
| 11456 | L06419_at_NA_illumina          | PLOD Lysyl hydroxylase                    | 6108.6035 |
| 11457 | X61123_at_GI_4502472-S         | BTG1 B-cell translocation gene 1, anti-   | 6109.456  |
| 11458 | AA011479_at_NA_illumina        | EST: zi01b10.r1 Soares fetal liver spleen | 6111.2285 |
| 11459 | RC_AA459245_at_GI_32528298-S   | EST: aa27a06.s1 NCI_CGAP_GCB1             | 6114.4326 |
| 11460 | N27587_s_at_GI_41281578-S      | Homo sapiens mRNA for KIAA0851            | 6115.7153 |
| 11461 | RC_AA599859_at_GI_34222276-S   | EST: ag33g02.s1 Jia bone marrow stroma    | 6117.198  |
| 11462 | RC_AA446570_at_NA_illumina     | Cyclin D-binding Myb-like protein         | 6119.1733 |
| 11463 | AF001954_at_GI_38201662-A      | Inhibitor of growth 1                     | 6122.8467 |
| 11464 | RC_AA418936_s_at_NA_illumina   | Homo sapiens mRNA for KIAA0795            | 6124.4966 |
| 11465 | RC_D52857_at_NA_illumina       | EST: Human fetal brain cDNA 3'-end GEN-   | 6125.678  |
| 11466 | U51334_at_GI_21327700-A        | Putative RNA binding protein (RBP56)      | 6127.157  |
| 11467 | RC_AA282069_at_GI_42660198-S   | KIAA0603 gene product                     | 6128.575  |
| 11468 | W68115_s_at_NA_illumina        | EST: zd41g09.r1 Soares fetal heart        | 6128.997  |
| 11469 | RC_AA478968_at_GI_8923323-S    | EST: zv18e04.s1 Soares NhHMPu S1          | 6129.486  |

|       |                              |                                          |           |
|-------|------------------------------|------------------------------------------|-----------|
| 11470 | M31932_at_GI_11056051-S      | FCGR2A Fc fragment of IgG, low affinity  | 6131.4434 |
| 11471 | RC_AA609028_at_NA_illumina   | Af10c02.s1 Soares_testis_NHT Homo        | 6133.3613 |
| 11472 | AA259028_at_NA_illumina      | EST: zs35e04.r1 NCI_CGAP_GCB1 Homo       | 6137.172  |
| 11473 | S73149_at_NA_illumina        | Insulin-like growth factor II {intron 7} | 6138.464  |
| 11474 | T95404_at_NA_illumina        | EST: ye43g01.r1 Homo sapiens cDNA        | 6139.8193 |
| 11475 | L10678_at_GI_16753216-A      | PFN2 Profilin 2                          | 6140.465  |
| 11476 | T83982_at_NA_illumina        | Human Chromosome 16 BAC clone            | 6141.518  |
| 11477 | RC_AA476582_at_GI_14917112-S | EST: zx03b04.s1 Soares total fetus       | 6142.2764 |
| 11478 | W26716_at_GI_4826859-S       | Non-histone chromosome protein 2 (S.     | 6144.4653 |
| 11479 | U45878_s_at_NA_illumina      | Inhibitor of apoptosis protein 1 mRNA    | 6145.5894 |
| 11480 | AA471293_at_GI_42476040-S    | EST: PMY2391 KG1-a Lambda Zap            | 6147.3936 |
| 11481 | W28988_at_NA_illumina        | EST: 54f5 Human retina cDNA randomly     | 6148.223  |
| 11482 | RC_AA236037_at_GI_7705579-A  | EST: zs05g08.s1 NCI_CGAP_GCB1            | 6148.615  |
| 11483 | M28882_s_at_GI_5729917-S     | CELL SURFACE GLYCOPROTEIN                | 6149.786  |
| 11484 | RC_AA393803_at_GI_18201920-A | EST: zv64c05.s1 Soares total fetus       | 6152.9673 |
| 11485 | RC_AA609600_at_NA_illumina   | EST: af15e08.s1 Soares testis NHT Homo   | 6153.3164 |
| 11486 | AB002373_at_NA_illumina      | KIAA0375 gene product                    | 6153.935  |
| 11487 | M30938_at_GI_12408650-S      | ATP-DEPENDENT DNA HELICASE II, 86        | 6154.127  |
| 11488 | R27140_at_NA_illumina        | EST: yh46c05.r1 Homo sapiens cDNA        | 6154.915  |
| 11489 | R82598_s_at_NA_illumina      | Dopachrome tautomerase (dopachrome       | 6155.699  |
| 11490 | AA091296_at_NA_illumina      | Phosphatidylinositol glycan, class F     | 6161.1772 |
| 11491 | N99617_at_GI_31377719-S      | Small inducible cytokine A5 (RANTES)     | 6161.238  |
| 11492 | RC_AA453810_at_NA_illumina   | Homo sapiens mRNA for putative           | 6162.7007 |
| 11493 | X65488_at_GI_14141160-A      | HETEROGENOUS NUCLEAR                     | 6166.826  |
| 11494 | U04811_at-2_NA_illumina      | Trophinin                                | 6167.9385 |
| 11495 | U04811_at_GI_29540546-A      | Trophinin mRNA                           | 6167.9385 |
| 11496 | AA402095_s_at_GI_38788179-S  | EST: zu53g01.r1 Soares ovary tumor       | 6169.336  |
| 11497 | U50079_s_at_NA_illumina      | Histone deacetylase HD1 mRNA             | 6171.197  |
| 11498 | AA095021_at_GI_4503936-S     | Glioblastoma amplified sequence          | 6172.156  |
| 11499 | RC_AA428608_at_GI_13375778-S | EST: zw69c09.s1 Soares testis NHT        | 6172.576  |
| 11500 | RC_AA451896_at_NA_illumina   | EST: zx16g06.s1 Soares total fetus       | 6173.7656 |
| 11501 | RC_AA035457_at_NA_illumina   | EST: zk27h06.s1 Soares pregnant uterus   | 6175.339  |
| 11502 | M59488_at_GI_5454033-S       | S-100 PROTEIN, BETA CHAIN                | 6175.58   |
| 11503 | M59488_at-2_NA_illumina      | S-100 PROTEIN, BETA CHAIN                | 6175.58   |
| 11504 | RC_AA429473_at_GI_8923535-S  | CD63 antigen (melanoma 1 antigen)        | 6176.607  |
| 11505 | RC_AA116036_at_NA_illumina   | EST: zm79a11.s1 Stratagene               | 6177.1616 |
| 11506 | U48936_at_GI_4506820-S       | Amiloride-sensitive epithelial sodium    | 6177.469  |
| 11507 | RC_AA255432_at_GI_45505136-S | EST: zr85f08.s1 Soares NhHMPu S1         | 6178.1284 |
| 11508 | RC_AA421476_at_NA_illumina   | EST: zu06d10.s1 Soares testis NHT Homo   | 6183.1074 |
| 11509 | RC_AA128486_at_NA_illumina   | EST: zm24e06.s1 Stratagene pancreas      | 6186.536  |
| 11510 | U41371_at_GI_37541034-S      | Spliceosome associated protein (SAP 145) | 6189.374  |
| 11511 | M94856_at_GI_4557580-S       | FATTY ACID-BINDING PROTEIN,              | 6189.396  |
| 11512 | X74262_at_GI_5032026-S       | RETINOBLASTOMA BINDING PROTEIN           | 6190.0137 |

|       |                                |                                           |           |
|-------|--------------------------------|-------------------------------------------|-----------|
| 11513 | RC_AA237024_at_NA_illumina     | EST: zr99b12.s1 NCI_CGAP_GCB1 Homo        | 6192.228  |
| 11514 | M58285_at_NA_illumina          | Membrane-associated protein (HEM-1)       | 6194.3853 |
| 11515 | RC_AA149585_at_GI_38679913-S   | EST: zl39e01.s1 Soares pregnant uterus    | 6196.2324 |
| 11516 | AA082193_at_NA_illumina        | EST: zn26d12.r1 Stratagene                | 6196.949  |
| 11517 | W77943_at_NA_illumina          | Apolipoprotein E                          | 6197.7397 |
| 11518 | U09550_at_GI_31543362-S        | Oviductal glycoprotein mRNA               | 6200.6274 |
| 11519 | RC_AA279341_at_GI_7656994-S    | EST: zs85b09.s1 NCI_CGAP_GCB1             | 6201.6387 |
| 11520 | RC_AA281293_at_NA_illumina     | EST: zt02h12.s1 NCI_CGAP_GCB1 Homo        | 6204.42   |
| 11521 | R24294_at_GI_32698687-S        | EST: yg32a08.r1 Homo sapiens cDNA         | 6205.3037 |
| 11522 | M11718_at_GI_16554580-S        | COL5A2 Collagen, type V, alpha            | 6206.4365 |
| 11523 | RC_AA433920_at_NA_illumina     | EST: zw52d11.s1 Soares total fetus        | 6213.456  |
| 11524 | AA150249_at_GI_41352060-I      | Homo sapiens metalloprotease 1 (MP1)      | 6213.963  |
| 11525 | U30827_s_at_GI_40254839-S      | Splicing factor SRp40-1 (SRp40) mRNA      | 6224.12   |
| 11526 | RC_AA401809_at_NA_illumina     | EST: zv65g11.s1 Soares total fetus        | 6234.2803 |
| 11527 | X13334_at_GI_4557416-S         | CD14 CD14 antigen                         | 6239.974  |
| 11528 | RC_AA428024_at_GI_40255309-S   | EST: zw32h03.s1 Soares ovary tumor        | 6241.259  |
| 11529 | RC_AA430033_at_GI_4505420-S    | Nucleolar localized protein               | 6243.4443 |
| 11530 | RC_AA350796_at_GI_37555948-S   | EST: EST58251 Infant brain Homo           | 6243.533  |
| 11531 | AB002352_at_GI_7662073-S       | KIAA0354 gene product                     | 6247.7246 |
| 11532 | RC_AA521157_at_NA_illumina     | EST: aa73c10.s1 NCI_CGAP_GCB1             | 6249.5874 |
| 11533 | AA463666_at_NA_illumina        | EST: aa06h02.r1 Soares NhHMPu S1          | 6250.231  |
| 11534 | RC_AA282750_i_at_NA_illumina   | EST: zs90h03.s1 NCI_CGAP_GCB1             | 6252.3027 |
| 11535 | W26847_at_NA_illumina          | EST: 15f2 Human retina cDNA randomly      | 6253.4907 |
| 11536 | RC_AA099835_at_GI_8922674-S    | EST: zk87e06.s1 Soares pregnant uterus    | 6254.8306 |
| 11537 | RC_AA454980_s_at_NA_illumina   | Homo sapiens zinc-finger helicase (hZFH)  | 6256.172  |
| 11538 | RC_AA427456_at_NA_illumina     | Casein kinase 1, alpha 1                  | 6258.5444 |
| 11539 | AA477891_at_GI_21389442-S      | EST: zu34e12.r1 Soares ovary tumor        | 6262.7607 |
| 11540 | W92678_at_NA_illumina          | EST: zd92a04.r1 Soares fetal heart        | 6263.172  |
| 11541 | AA460128_at_NA_illumina        | Homo sapiens Dim1p homolog (hdim1+)       | 6267.316  |
| 11542 | D13641_at_GI_7657256-S         | KIAA0016 gene                             | 6267.726  |
| 11543 | RC_AA425777_at_NA_illumina     | EST: zv83d10.s1 Soares total fetus        | 6268.0557 |
| 11544 | RC_AA063280_at_GI_6679073-S    | EST: zl98f05.s1 Stratagene corneal stroma | 6268.7896 |
| 11545 | RC_AA412722_s_at_GI_37594439-S | Homo sapiens putative cyclin G1           | 6268.9937 |
| 11546 | RC_AA609461_at_NA_illumina     | Dynamin-like protein                      | 6269.6787 |
| 11547 | RC_AA253369_s_at_GI_6912395-S  | EST: zr77b01.s1 Soares NhHMPu S1          | 6271.72   |
| 11548 | RC_AA393876_s_at_NA_illumina   | APOLIPOPROTEIN AI REGULATORY              | 6277.0044 |
| 11549 | RC_AA397818_at_NA_illumina     | GTP binding protein 1                     | 6277.7563 |
| 11550 | L08895_at_GI_19923214-S        | MEF2C MADS box transcription enhancer     | 6278.72   |
| 11551 | W23469_at_NA_illumina          | Vesicle trafficking protein sec22b        | 6284.618  |
| 11552 | R73170_at_GI_34452731-S        | EST: yj91b01.r1 Homo sapiens cDNA         | 6288.8657 |
| 11553 | RC_AA453422_f_at_NA_illumina   | EST: zx32g01.s1 Soares total fetus        | 6289.202  |
| 11554 | AA214738_at_GI_32130529-A      | EST: PMY0132 KG1-a Lambda Zap             | 6289.826  |
| 11555 | RC_AA450247_at_GI_7706305-S    | EST: zx43f01.s1 Soares total fetus        | 6293.6626 |

|       |                               |                                         |           |
|-------|-------------------------------|-----------------------------------------|-----------|
| 11556 | RC_AA101080_at_GI_5730109-S   | EST: zn25d03.s1 Stratagene              | 6293.7485 |
| 11557 | RC_AA599679_s_at_NA_illumina  | Homo sapiens clone 23584 mRNA           | 6293.8745 |
| 11558 | AA059327_i_at_NA_illumina     | EST: zf65e11.r1 Soares retina N2b4HR    | 6297.676  |
| 11559 | RC_AA454115_s_at_NA_illumina  | EST: zx33d09.s1 Soares total fetus      | 6299.0923 |
| 11560 | RC_AA402268_at_GI_41281461-S  | KIAA0652 gene product                   | 6299.2876 |
| 11561 | W73841_at_GI_34147218-S       | EST: zd50d02.r1 Soares fetal heart      | 6300.0835 |
| 11562 | RC_AA464251_at_NA_illumina    | EST: zx81b07.s1 Soares ovary tumor      | 6302.906  |
| 11563 | RC_AA252176_at_NA_illumina    | Homo sapiens mRNA for KIAA0725          | 6303.901  |
| 11564 | RC_AA459272_at_NA_illumina    | EST: aa27d08.s1 NCI_CGAP_GCB1           | 6307.6514 |
| 11565 | RC_AA196512_at_NA_illumina    | Human DNA sequence from clone 431H6     | 6318.9697 |
| 11566 | RC_AA485965_at_NA_illumina    | EST: ab40h12.s1 Stratagene HeLa cell s3 | 6319.2114 |
| 11567 | RC_AA009744_at_GI_16945965-S  | EST: ze82g01.s1 Soares fetal heart      | 6320.1675 |
| 11568 | RC_AA399035_at_NA_illumina    | EST: zt87d04.s1 Soares testis NHT Homo  | 6320.3237 |
| 11569 | RC_AA291644_at_GI_42740889-S  | EST: zt37a11.s1 Soares ovary tumor      | 6320.4336 |
| 11570 | M95627_at_GI_4557228-S        | Angio-associated migratory cell protein | 6322.9556 |
| 11571 | C02375_at_NA_illumina         | Human mRNA containing an Alu repeat     | 6323.5146 |
| 11572 | RC_AA195250_at_GI_25141322-S  | EST: zr36d02.s1 Soares NhHMPu S1        | 6324.8726 |
| 11573 | U41060_at_GI_12751474-S       | Breast cancer, estrogen regulated LIV-1 | 6325.722  |
| 11574 | R62894_at_NA_illumina         | EST: yi11h08.r1 Homo sapiens cDNA       | 6326.353  |
| 11575 | H68953_at_NA_illumina         | Transferrin                             | 6326.7754 |
| 11576 | RC_AA007145_at_NA_illumina    | EST: 13cDNA36A-3.seq Soares infant      | 6327.1685 |
| 11577 | M37271_s_at_NA_illumina       | T-CELL ANTIGEN CD7 PRECURSOR            | 6327.7554 |
| 11578 | RC_AA235553_at_NA_illumina    | EST: zt30f07.s1 Soares ovary tumor      | 6331.1997 |
| 11579 | RC_AA278376_s_at_GI_23111025- | EST: zt08a12.s1 NCI_CGAP_GCB1 Homo      | 6334.187  |
| 11580 | U62739_at_GI_4502374-S        | Branched-chain amino acid               | 6335.173  |
| 11581 | RC_AA283720_at_GI_21359904-S  | Chromosome 1 specific transcript        | 6336.109  |
| 11582 | RC_AA405698_at_NA_illumina    | EST: zu66e10.s1 Soares testis NHT Homo  | 6338.6743 |
| 11583 | U66619_at_GI_21264352-S       | SWI/SNF complex 60 KDa subunit          | 6339.686  |
| 11584 | RC_AA446968_at_NA_illumina    | EST: zw85f08.s1 Soares total fetus      | 6339.93   |
| 11585 | U76764_s_at_GI_17978488-A     | CD97 CD97 antigen (leucocyte antigen)   | 6340.8057 |
| 11586 | RC_AA621524_s_at_NA_illumina  | EST: af93h09.s1 Soares total fetus      | 6341.854  |
| 11587 | RC_AA047616_at_NA_illumina    | EST: zf13f05.s1 Soares fetal heart      | 6342.2065 |
| 11588 | D87442_at_GI_24638432-S       | KIAA0253 gene, partial cds              | 6344.007  |
| 11589 | RC_AA255822_at_NA_illumina    | EST: zr84g09.s1 Soares NhHMPu S1        | 6344.228  |
| 11590 | Z23115_at_GI_20336333-A       | APOPTOSIS REGULATOR BCL-X               | 6345.7275 |
| 11591 | Z23115_at-2_NA_illumina       | BCL2-like 1                             | 6345.7275 |
| 11592 | S95936_at_GI_21536430-S       | TF Transferrin                          | 6346.446  |
| 11593 | R23653_f_at_NA_illumina       | EST: yh35g01.r1 Homo sapiens cDNA       | 6350.2856 |
| 11594 | RC_AA450302_s_at_NA_illumina  | Peroxisomal biogenesis factor 14        | 6351.45   |
| 11595 | RC_AA402637_at_NA_illumina    | EST: zu49e02.s1 Soares ovary tumor      | 6352.4644 |
| 11596 | N49353_at_NA_illumina         | EST: yy23h12.r1 Homo sapiens cDNA       | 6357.6    |
| 11597 | U05291_at_GI_5016093-S        | FMOD Fibromodulin                       | 6360.052  |
| 11598 | RC_AA488992_at_NA_illumina    | EST: aa54c02.s1 NCI_CGAP_GCB1           | 6363.3516 |

|       |                                |                                            |           |
|-------|--------------------------------|--------------------------------------------|-----------|
| 11599 | AA032048_at_GI_18105005-S      | EST: zk15c03.r1 Soares pregnant uterus     | 6364.3677 |
| 11600 | RC_AA463215_at_NA_illumina     | EST: zx71f01.s1 Soares total fetus         | 6367.494  |
| 11601 | M90657_at_GI_21265100-S        | TUMOR-ASSOCIATED ANTIGEN L6                | 6372.0986 |
| 11602 | RC_AA488191_at_GI_29789284-S   | EST: ad08e05.s1 Soares NbHFB Homo          | 6373.0625 |
| 11603 | RC_AA460449_at_GI_34304343-A   | EST: zx67g01.s1 Soares total fetus         | 6375.3687 |
| 11604 | RC_AA417714_at_GI_38045936-S   | EST: zv01e02.s1 NCI_CGAP_GCB1              | 6382.3687 |
| 11605 | RC_AA437258_at_GI_18379352-S   | EST: zv54f03.s1 Soares testis NHT Homo     | 6385.4067 |
| 11606 | X62535_at_GI_41393585-A        | DAGK1 Diacylglycerol kinase, alpha         | 6387.2144 |
| 11607 | M74002_at_GI_23111060-S        | Arginine-rich nuclear protein mRNA         | 6387.3228 |
| 11608 | RC_AA291549_at_GI_22538496-S   | EST: zt40e10.s1 Soares ovary tumor         | 6388.0757 |
| 11609 | RC_AA433929_at_NA_illumina     | EST: zw52e10.s1 Soares total fetus         | 6388.0825 |
| 11610 | RC_AA620970_at_GI_4507294-S    | Syntaxin 7                                 | 6390.0835 |
| 11611 | RC_AA053660_at_GI_15042952-S   | EST: zl74e07.s1 Stratagene colon           | 6398.041  |
| 11612 | U76456_at-2_NA_illumina        | Human tissue inhibitor of                  | 6399.0513 |
| 11613 | U76456_at_GI_4507514-S         | Tissue inhibitor of metalloproteinase 4    | 6399.0513 |
| 11614 | T08839_at_NA_illumina          | Homo sapiens mRNA for KIAA0634             | 6400.717  |
| 11615 | L15533_rna1_at_NA_illumina     | Pancreatitis-associated protein (PAP) gene | 6401.057  |
| 11616 | AA465000_s_at_GI_20070223-S    | BING4                                      | 6402.346  |
| 11617 | Z81326_at_GI_4826903-S         | Protease inhibitor 12 (PI12; neuroserpin)  | 6402.4624 |
| 11618 | Z81326_at-2_NA_illumina        | Protease inhibitor 12 (neuroserpin)        | 6402.4624 |
| 11619 | RC_AA609797_at_NA_illumina     | EST: ae62a11.s1 Stratagene lung            | 6402.753  |
| 11620 | RC_AA443321_at_NA_illumina     | EST: zw94e05.s1 Soares total fetus         | 6404.4707 |
| 11621 | M33882_at_GI_18490989-S        | MX1 Myxovirus (influenza) resistance 1,    | 6405.3945 |
| 11622 | RC_AA293300_s_at_GI_39777607-  | EST: zt28d03.s1 Soares ovary tumor         | 6406.367  |
| 11623 | RC_AA227699_at_GI_31342347-S   | Human guanine nucleotide exchange          | 6408.8203 |
| 11624 | RC_AA017146_at_NA_illumina     | EST: ze41a07.s1 Soares retina N2b4HR       | 6418.493  |
| 11625 | RC_AA488166_s_at_GI_13899252-  | EST: ad08b01.s1 Soares NbHFB Homo          | 6419.762  |
| 11626 | RC_AA207114_at_NA_illumina     | EST: zq81c04.s1 Stratagene hNT neuron      | 6421.883  |
| 11627 | AA281338_at_NA_illumina        | EST: zs94g03.r1 NCI_CGAP_GCB1 Homo         | 6424.246  |
| 11628 | RC_AA063431_f_at_GI_32307138-S | EST: zf70d06.s1 Soares pineal gland        | 6426.69   |
| 11629 | RC_AA256208_at_NA_illumina     | EST: zr80a08.s1 Soares NhHMPu S1           | 6430.499  |
| 11630 | Y07604_at_GI_37675275-S        | Nucleoside-diphosphate kinase              | 6432.7324 |
| 11631 | RC_AA025086_at_GI_38683841-S   | EST: ze78a01.s1 Soares fetal heart         | 6432.771  |
| 11632 | AA393961_at_NA_illumina        | EST: zt78b10.r1 Soares testis NHT Homo     | 6434.5186 |
| 11633 | RC_AA243007_at_GI_18375679-S   | EST: zr25g12.s1 Stratagene NT2 neuronal    | 6435.323  |
| 11634 | RC_AA237037_at_NA_illumina     | Transmembrane 7 superfamily member 1       | 6437.0386 |
| 11635 | X79353_at_GI_4503970-S         | Rab GDI alpha                              | 6441.671  |
| 11636 | RC_AA187490_at_GI_32526910-S   | EST: zp61d06.s1 Stratagene endothelial     | 6442.7    |
| 11637 | RC_AA478473_at_GI_7661827-S    | EST: zx16a05.s1 Soares total fetus         | 6443.6357 |
| 11638 | RC_AA426612_at_GI_41327716-S   | Human FK-506 binding protein homologue     | 6445.2046 |
| 11639 | RC_AA424708_at_NA_illumina     | EST: zv33b08.s1 Soares ovary tumor         | 6448.5327 |
| 11640 | U77594_at_GI_8051632-S         | Tazarotene-induced gene 2 (TIG2) mRNA      | 6448.937  |
| 11641 | AA039762_at_NA_illumina        | EST: zf10a09.r1 Soares fetal heart         | 6449.5537 |

|       |                              |                                              |           |
|-------|------------------------------|----------------------------------------------|-----------|
| 11642 | AA504565_at_NA_illumina      | Homo sapiens g16 protein (g16) mRNA,         | 6450.611  |
| 11643 | X52222_at_NA_illumina        | Excision repair cross-complementing          | 6451.228  |
| 11644 | RC_AA279416_at_NA_illumina   | EST: zs85g03.s1 NCI_CGAP_GCB1                | 6451.449  |
| 11645 | RC_AA150205_at_GI_4507828-S  | Ubiquitous Kruppel-like transcription factor | 6451.734  |
| 11646 | RC_AA598680_at_NA_illumina   | KIAA0618 gene product                        | 6452.0493 |
| 11647 | D21267_at_GI_18765734-A      | SYNAPTOSOMAL ASSOCIATED                      | 6452.1177 |
| 11648 | RC_AA084868_at_NA_illumina   | EST: zn11f07.s1 Stratagene hNT neuron        | 6453.093  |
| 11649 | H27035_at_NA_illumina        | EST: yl65d06.r1 Homo sapiens cDNA            | 6458.086  |
| 11650 | RC_D51095_at_GI_22001414-S   | EST: Human fetal brain cDNA 3'-end GEN-      | 6458.193  |
| 11651 | W27386_at_GI_31543158-S      | Human Chromosome 16 BAC clone                | 6463.167  |
| 11652 | X12451_at_GI_22202618-A      | CTSL Cathepsin L                             | 6466.084  |
| 11653 | RC_AA461505_at_NA_illumina   | EST: zx60b05.s1 Soares testis NHT Homo       | 6467.6333 |
| 11654 | RC_AA041535_at_NA_illumina   | EST: zk44f04.s1 Soares pregnant uterus       | 6469.2646 |
| 11655 | RC_AA449471_at_NA_illumina   | EST: zx08f06.s1 Soares total fetus           | 6474.41   |
| 11656 | RC_AA016255_at_NA_illumina   | EST: ze33c07.s1 Soares retina N2b4HR         | 6474.728  |
| 11657 | Z97074_at_NA_illumina        | Rab9 effector p40                            | 6475.6377 |
| 11658 | Z97074_at-2_NA_illumina      | Homo sapiens mRNA for Rab9 effector          | 6475.6377 |
| 11659 | RC_AA447545_at_GI_28144896-A | EST: zw81d08.s1 Soares testis NHT            | 6480.0483 |
| 11660 | RC_AA478614_at_GI_19923714-S | EST: zv19c10.s1 Soares NhHMPu S1             | 6482.78   |
| 11661 | RC_AA620461_at_NA_illumina   | EST: ae58e02.s1 Stratagene lung              | 6482.7935 |
| 11662 | RC_AA411809_at_GI_9506400-S  | EST: zt67a06.s1 Soares testis NHT Homo       | 6483.4    |
| 11663 | RC_AA400760_at_GI_31377572-S | EST: zt71b01.s1 Soares testis NHT Homo       | 6485.0054 |
| 11664 | RC_AA126426_s_at_NA_illumina | Human brain secretory protein hSec10p        | 6485.0703 |
| 11665 | RC_AA281451_at_GI_24497446-A | EST: zt02g06.s1 NCI_CGAP_GCB1 Homo           | 6485.3354 |
| 11666 | U51698_at_NA_illumina        | EST: Human mRNA sequence. (from              | 6488.6206 |
| 11667 | RC_AA427427_at_NA_illumina   | Human DNA sequence from clone 283E3          | 6489.54   |
| 11668 | AA056136_at_NA_illumina      | EST: zf22b11.r1 Soares fetal heart           | 6492.7344 |
| 11669 | RC_AA456665_at_GI_22547132-S | EST: aa01f05.s1 Soares NhHMPu S1             | 6493.3794 |
| 11670 | H29723_at_NA_illumina        | EST: yp02a10.r1 Homo sapiens cDNA            | 6495.0386 |
| 11671 | X06985_at_GI_4504436-S       | HMOX1 Heme oxygenase (decycling) 1           | 6495.457  |
| 11672 | R01783_at_NA_illumina        | EST: ye84a02.r1 Homo sapiens cDNA            | 6495.811  |
| 11673 | X01060_at_NA_illumina        | TFRC Transferrin receptor (p90, CD71)        | 6496.1455 |
| 11674 | AA044715_at_NA_illumina      | EST: zk75g11.r1 Soares pregnant uterus       | 6496.1704 |
| 11675 | D82226_s_at_GI_24430154-A    | EST: similar to TAT-binding protein-2,       | 6497.161  |
| 11676 | Z22548_at_GI_33188453-A      | Thiol-specific antioxidant protein mRNA      | 6497.1733 |
| 11677 | J03473_at_NA_illumina        | ADPRT ADP-ribosyltransferase (NAD+;          | 6497.893  |
| 11678 | RC_AA491234_at_NA_illumina   | Homo sapiens mRNA for KIAA0829               | 6499.4917 |
| 11679 | AA234259_at_GI_9910389-S     | Zr71c08.r1 Soares_NhHMPu_S1 Homo             | 6501.9775 |
| 11680 | AA422170_at_NA_illumina      | EST: zv31c07.r1 Soares ovary tumor           | 6504.2935 |
| 11681 | RC_AA441802_at_GI_24797154-A | EST: zw62d04.s1 Soares total fetus           | 6504.611  |
| 11682 | RC_AA436660_at_NA_illumina   | EST: zv57c08.s1 Soares testis NHT Homo       | 6505.5693 |
| 11683 | H27242_at_NA_illumina        | EST: yl63h11.r1 Homo sapiens cDNA            | 6506.0264 |
| 11684 | X91911_s_at_NA_illumina      | Glioma pathogenesis-related protein          | 6508.6953 |



|       |                              |                                           |           |
|-------|------------------------------|-------------------------------------------|-----------|
| 11685 | RC_AA279294_at_GI_34222212-S | Homo sapiens mRNA for LAK-4p,             | 6508.8066 |
| 11686 | X97324_at_GI_34577058-S      | Adipophilin                               | 6510.9062 |
| 11687 | AA206481_at_GI_8922611-S     | EST: zq51c01.r1 Stratagene                | 6515.3687 |
| 11688 | RC_AA099301_at_GI_31377698-S | EST: zk85g03.s1 Soares pregnant uterus    | 6517.2554 |
| 11689 | AF006516_at_GI_4885610-S     | Spectrin SH3 domain binding protein 1     | 6521.4014 |
| 11690 | RC_AA397920_at_NA_illumina   | EST: zt58h12.s1 Soares testis NHT Homo    | 6522.169  |
| 11691 | RC_AA429290_s_at_NA_illumina | EST: zv50d10.s1 Soares ovary tumor        | 6523.3325 |
| 11692 | R80573_at_NA_illumina        | EST: yi92f11.r1 Homo sapiens cDNA clone   | 6525.63   |
| 11693 | RC_AA258379_at_NA_illumina   | Angiotensin receptor-like 2               | 6526.639  |
| 11694 | M96843_at-2_NA_illumina      | Human striated muscle contraction         | 6527.5044 |
| 11695 | M96843_at_NA_illumina        | ID2 Inhibitor of DNA binding 2, dominant  | 6527.5044 |
| 11696 | RC_AA598636_at_NA_illumina   | EST: ae36a07.s1 Gessler Wilms tumor       | 6529.6963 |
| 11697 | RC_AA063596_at_GI_7706442-S  | EST: ze87c06.s1 Soares fetal heart        | 6532.854  |
| 11698 | X91247_at_GI_33519429-A      | TXNRD1 Thioredoxin reductase              | 6533.681  |
| 11699 | RC_AA253410_at_NA_illumina   | EST: zr77d02.s1 Soares NhHMPu S1          | 6533.732  |
| 11700 | D13988_at_GI_6598322-S       | Rab GDI mRNA                              | 6534.633  |
| 11701 | RC_AA007202_at_GI_22547196-S | EST: 13cDNA47-3.seq Soares infant brain   | 6537.4917 |
| 11702 | RC_AA040465_at_NA_illumina   | EST: zk46h09.s1 Soares pregnant uterus    | 6537.858  |
| 11703 | RC_AA417371_at_NA_illumina   | EST: zu05a10.s1 Soares testis NHT Homo    | 6538.0347 |
| 11704 | RC_AA279632_at_NA_illumina   | Homo sapiens chromosome 11, BAC CIT-      | 6543.7896 |
| 11705 | U66838_at_GI_16306528-S      | Cyclin A1 mRNA                            | 6545.1777 |
| 11706 | RC_AA441818_at_NA_illumina   | Desmin                                    | 6546.819  |
| 11707 | L38928_at-2_NA_illumina      | Homo sapiens 5,10-                        | 6547.0703 |
| 11708 | L38928_at_GI_5453745-S       | 5,10-methenyltetrahydrofolate synthetase  | 6547.0703 |
| 11709 | H59008_at_GI_22035601-A      | Homo sapiens mRNA for NIK, partial cds    | 6547.733  |
| 11710 | AA461215_at_NA_illumina      | EST: zx61a09.r1 Soares total fetus        | 6548.652  |
| 11711 | L34587_at_GI_16933562-S      | RNA polymerase II elongation factor SIII, | 6549.099  |
| 11712 | RC_AA434230_r_at_NA_illumina | EST: zw24e10.s1 Soares ovary tumor        | 6549.595  |
| 11713 | RC_AA113266_at_NA_illumina   | EST: zn69b08.s1 Stratagene HeLa cell s3   | 6550.459  |
| 11714 | S81542_s_at_NA_illumina      | Endothelin-A receptor delta 4             | 6551.751  |
| 11715 | N99505_at_NA_illumina        | EST: za39c01.r1 Homo sapiens cDNA         | 6553.985  |
| 11716 | D79687_at_GI_34222105-S      | EST: Human aorta cDNA 5'-end GEN-         | 6554.024  |
| 11717 | RC_AA456595_at_NA_illumina   | EST: zx73d11.s1 Soares ovary tumor        | 6556.696  |
| 11718 | RC_AA458959_at_NA_illumina   | EST: zx88f02.s1 Soares ovary tumor        | 6556.824  |
| 11719 | RC_AA455111_at_NA_illumina   | Homo sapiens DNA sequence from PAC        | 6558.304  |
| 11720 | Z68280_cds2_s_at_NA_illumina | Erythrocyte adducin alpha subunit gene    | 6559.303  |
| 11721 | RC_AA481394_at_GI_6631076-S  | Homo sapiens mRNA for KIAA0873            | 6561.792  |
| 11722 | D82422_at_GI_31543639-S      | EST: similar to none, mRNA sequence.      | 6562.5737 |
| 11723 | L27943_at_GI_11386156-S      | CDA Cytidine deaminase                    | 6563.1953 |
| 11724 | M97287_at_GI_33356175-S      | SATB1 Special AT-rich sequence binding    | 6563.6606 |
| 11725 | U91903_at_GI_38455387-S      | Frezzled (fre) mRNA                       | 6565.305  |
| 11726 | AA316868_at_GI_21362103-S    | EST: EST188529 HCC cell line              | 6566.0537 |
| 11727 | RC_AA026417_at_GI_6912277-S  | EST: ze92g08.s1 Soares fetal heart        | 6568.1357 |

|       |                                |                                           |           |
|-------|--------------------------------|-------------------------------------------|-----------|
| 11728 | U34343_at_NA_illumina          | 13kD differentiation-associated protein   | 6568.6016 |
| 11729 | RC_AA485428_at_GI_28933450-S   | Homo sapiens mRNA for KIAA0620            | 6568.9224 |
| 11730 | RC_AA447621_at_NA_illumina     | EST: zw97b02.s1 Soares total fetus        | 6569.991  |
| 11731 | RC_AA084506_at_NA_illumina     | EST: zn18g04.s1 Stratagene                | 6572.865  |
| 11732 | C02381_at_GI_34452701-S        | EST: HUMGS0010489, Human Gene             | 6576.7485 |
| 11733 | RC_AA598724_at_NA_illumina     | EST: ae49f01.s1 Stratagene lung           | 6577.748  |
| 11734 | RC_AA599214_at_NA_illumina     | EST: ag34c05.s1 Jia bone marrow stroma    | 6578.661  |
| 11735 | RC_AA504835_at_NA_illumina     | EST: aa64e01.s1 NCI_CGAP_GCB1             | 6581.1875 |
| 11736 | AB002387_at_GI_4826845-S       | Myosin VI                                 | 6581.4893 |
| 11737 | RC_AA424849_at_GI_21361471-S   | EST: zw03b06.s1 Soares NhHMPu S1          | 6582.007  |
| 11738 | AA402971_s_at_GI_21618355-A    | Homo sapiens mRNA for serine protease     | 6583.615  |
| 11739 | RC_AA287133_s_at_NA_illumina   | EST: zt20g05.s1 Soares ovary tumor        | 6583.7017 |
| 11740 | D17793_at_GI_24497582-S        | DDH1 Dihydrodiol dehydrogenase            | 6584.6436 |
| 11741 | X14975_at_GI_13569859-S        | CD1 R2 gene for MHC-related antigen       | 6586.0864 |
| 11742 | X52402_s_at_NA_illumina        | Human partial mRNA for homeodomain        | 6590.124  |
| 11743 | D31225_at_GI_7705800-S         | EST: Human fetal-lung cDNA 5'-end         | 6590.2217 |
| 11744 | W23553_at_NA_illumina          | EST: za45f02.r1 Soares fetal liver spleen | 6591.5645 |
| 11745 | AA090608_at_GI_7705629-S       | EST: y0994.seq.F Fetal heart, Lambda      | 6592.8228 |
| 11746 | RC_AA416685_at_GI_38176153-S   | Homo sapiens Munc13 mRNA, complete        | 6593.261  |
| 11747 | RC_AA609113_at_GI_14195596-A   | Homo sapiens mRNA, chromosome 1           | 6594.692  |
| 11748 | D14520_at_GI_14251214-S        | GC-Box binding protein BTEB2              | 6594.827  |
| 11749 | HG1496-HT1496_s_at_NA_illumina | Adrenal-Specific Protein Pg2              | 6595.4194 |
| 11750 | AA157623_s_at_GI_41281417-S    | KIAA0750 gene product                     | 6598.677  |
| 11751 | RC_AA160876_at_NA_illumina     | H.sapiens hGDS mRNA for smg GDS           | 6599.0386 |
| 11752 | Z71460_at_NA_illumina          | Vacuolar-type H(+)-ATPase 115 kDa         | 6600.4595 |
| 11753 | D80897_at_NA_illumina          | Homo sapiens clone 24736 mRNA             | 6601.038  |
| 11754 | S78771_s_at_NA_illumina        | RING3 PROTEIN                             | 6601.2827 |
| 11755 | RC_AA400410_at_NA_illumina     | RPB5-mediating protein                    | 6602.6763 |
| 11756 | RC_AA496569_at_NA_illumina     | EST: zv38h01.s1 Soares ovary tumor        | 6603.0776 |
| 11757 | RC_AA350729_at_NA_illumina     | EST: EST58150 Infant brain Homo           | 6604.4634 |
| 11758 | RC_AA010665_at_NA_illumina     | EST: ze19f06.s1 Soares fetal heart        | 6605.3115 |
| 11759 | U67963_at_GI_41393552-S        | Lysophospholipase homolog (HU-K5)         | 6605.3374 |
| 11760 | RC_AA236516_at_NA_illumina     | 33 kDa transcriptional co-activator       | 6607.2314 |
| 11761 | RC_AA149051_at_NA_illumina     | EST: zl46b12.s1 Soares pregnant uterus    | 6608.144  |
| 11762 | M93036_at_GI_4505058-S         | MAJOR GASTROINTESTINAL TUMOR-             | 6612.9272 |
| 11763 | Z30644_at_GI_4557474-S         | Chloride channel (putative) 2163bp        | 6613.211  |
| 11764 | RC_AA416723_at_GI_45237192-S   | KIAA0446 gene product                     | 6615.0166 |
| 11765 | RC_AA194045_at_NA_illumina     | Jumonji (mouse) homolog                   | 6615.227  |
| 11766 | RC_AA039469_at_GI_37549297-S   | EST: zf06c12.s1 Soares fetal heart        | 6616.9526 |
| 11767 | L16862_at_GI_4504100-S         | GPRK6 G protein-coupled receptor kinase   | 6617.2935 |
| 11768 | RC_AA004765_at_GI_7019576-S    | EST: zh89a10.s1 Soares fetal liver spleen | 6617.7246 |
| 11769 | RC_AA496048_at_GI_8923393-S    | EST: zv72e10.s1 Soares total fetus        | 6621.1245 |
| 11770 | D63486_at_GI_44662824-S        | KIAA0152 gene                             | 6623.6523 |

|       |                              |                                        |           |
|-------|------------------------------|----------------------------------------|-----------|
| 11771 | W26785_f_at_NA_illumina      | EST: 15d6 Human retina cDNA randomly   | 6626.486  |
| 11772 | L46720_s_at_NA_illumina      | Phosphodiesterase I alpha              | 6630.6143 |
| 11773 | AB002335_at_GI_21361457-S    | KIAA0337 gene product                  | 6632.2    |
| 11774 | RC_AA456584_at_NA_illumina   | EST: zx73c09.s1 Soares ovary tumor     | 6633.5757 |
| 11775 | AB002356_s_at_GI_18860869-A  | DENN mRNA                              | 6637.179  |
| 11776 | L40027_at_GI_11995473-S      | Glycogen synthase kinase 3 mRNA        | 6637.255  |
| 11777 | RC_AA458919_at_NA_illumina   | Homo sapiens signalosome subunit 2     | 6637.947  |
| 11778 | AB002324_at_NA_illumina      | Human mRNA for KIAA0326 gene, partial  | 6639.0166 |
| 11779 | RC_AA382372_s_at_NA_illumina | EST: EST95571 Testis I Homo sapiens    | 6639.181  |
| 11780 | RC_AA477110_at_NA_illumina   | EST: zu37a08.s1 Soares ovary tumor     | 6639.444  |
| 11781 | X56253_rna1_at_GI_10947032-S | MPR46 gene for 46kd mannose 6-         | 6642.6113 |
| 11782 | AA379273_s_at_NA_illumina    | Human X2 box repressor mRNA, complete  | 6644.8223 |
| 11783 | RC_AA233926_at_NA_illumina   | EST: zr49e11.s1 Soares NhHMPu S1       | 6648.819  |
| 11784 | AA424255_at_GI_22538402-A    | EST: zv81f02.r1 Soares total fetus     | 6657.9517 |
| 11785 | D82175_s_at_GI_38201688-S    | Ran GTPase activating protein 1        | 6661.3706 |
| 11786 | AA463595_at_NA_illumina      | EST: zw54h02.r1 Soares total fetus     | 6661.9434 |
| 11787 | RC_AA433947_at_NA_illumina   | EST: zw52g10.s1 Soares total fetus     | 6662.4233 |
| 11788 | RC_AA098864_at_NA_illumina   | EST: zk84f01.s1 Soares pregnant uterus | 6664.349  |
| 11789 | N24990_s_at_NA_illumina      | EST: yx16e10.r1 Homo sapiens cDNA      | 6664.6553 |
| 11790 | RC_AA478441_at_GI_6042195-S  | Cathepsin F                            | 6667.14   |
| 11791 | X82434_at_GI_4557552-S       | EMD Emerin (Emery-Dreifuss muscular    | 6668.223  |
| 11792 | L37368_at_GI_18379333-A      | (clone E5.1) RNA-binding protein mRNA  | 6668.7153 |
| 11793 | T40327_s_at_NA_illumina      | EST: ya32c04.r3 Homo sapiens cDNA      | 6670.406  |
| 11794 | RC_AA427553_at_GI_13376446-S | EST: zw22e04.s1 Soares ovary tumor     | 6673.8735 |
| 11795 | RC_AA281617_at_GI_27477040-S | EST: zt03b09.s1 NCI_CGAP_GCB1 Homo     | 6674.047  |
| 11796 | X51408_at_GI_21361572-S      | CHN Chimerin, n-                       | 6680.445  |
| 11797 | RC_AA069285_at_GI_31543909-S | Ubiquitin-specific protease 1          | 6683.0576 |
| 11798 | RC_AA443828_at_NA_illumina   | EST: zw88e11.s1 Soares total fetus     | 6686.2837 |
| 11799 | X91504_at_GI_33466360-S      | TFCOUP2 Transcription factor COUP 2    | 6686.619  |
| 11800 | AA419186_at_NA_illumina      | EST: zv34f07.r1 Soares ovary tumor     | 6688.837  |
| 11801 | RC_AA292758_at_NA_illumina   | EST: zt56a01.s1 Soares ovary tumor     | 6690.2666 |
| 11802 | RC_AA454930_at_NA_illumina   | EST: aa30b09.s1 NCI_CGAP_GCB1          | 6694.3135 |
| 11803 | Z14000_at_GI_11863157-S      | RING1 Ring finger protein 1            | 6694.3975 |
| 11804 | J04056_at_GI_4502598-S       | CBR Carbonyl reductase                 | 6694.8716 |
| 11805 | U83908_at_GI_34304340-A      | Nuclear antigen H731 mRNA              | 6695.1167 |
| 11806 | U83908_at-2_NA_illumina      | Homo sapiens nuclear antigen H731-like | 6695.1167 |
| 11807 | RC_AA521306_at_NA_illumina   | EST: aa79g06.s1 NCI_CGAP_GCB1          | 6695.5015 |
| 11808 | D25328_at_GI_41352062-S      | PFKP Phosphofructokinase, platelet     | 6697.9805 |
| 11809 | RC_AA490670_at_NA_illumina   | EST: zw99f10.s1 Soares total fetus     | 6706.0195 |
| 11810 | AB002328_at_GI_22027497-S    | Human mRNA for KIAA0330 gene, partial  | 6709.8613 |
| 11811 | X52882_at_GI_13540472-S      | T-COMPLEX PROTEIN 1, ALPHA             | 6713.296  |
| 11812 | RC_AA293568_at_GI_8923664-S  | EST: zt25h08.s1 Soares ovary tumor     | 6716.4097 |
| 11813 | H53657_s_at_GI_10947058-S    | Homo sapiens mRNA for KIAA0511         | 6718.58   |

|       |                               |                                           |           |
|-------|-------------------------------|-------------------------------------------|-----------|
| 11814 | RC_AA219179_at_GI_5032180-S   | Homo sapiens mRNA for (JM3) preprotein    | 6724.09   |
| 11815 | RC_AA001220_at_GI_32483395-S  | EST: ze48h10.s1 Soares retina N2b4HR      | 6728.0063 |
| 11816 | RC_AA018976_at_GI_30795181-A  | EST: ze55e09.s1 Soares retina N2b4HR      | 6729.6733 |
| 11817 | AA011243_s_at_NA_illumina     | EST: ze19d03.r1 Soares fetal heart        | 6730.5317 |
| 11818 | C01394_at_GI_28933464-S       | H.sapiens gene from PAC 42616, similar to | 6730.6    |
| 11819 | AA504549_at_NA_illumina       | EST: aa60c12.r1 NCI_CGAP_GCB1 Homo        | 6733.9263 |
| 11820 | AB002348_at_GI_29746781-S     | Human mRNA for KIAA0350 gene, partial     | 6740.913  |
| 11821 | M22760_at_GI_17017986-S       | CYTOCHROME C OXIDASE                      | 6741.396  |
| 11822 | RC_AA233311_at_NA_illumina    | EST: zr69g11.s1 Soares NhHMPu S1          | 6743.2886 |
| 11823 | AA232774_at_GI_24475703-S     | EST: zr47a10.r1 Soares NhHMPu S1          | 6743.742  |
| 11824 | RC_AA465342_at_GI_22027510-A  | EST: aa23a09.s1 NCI_CGAP_GCB1             | 6744.296  |
| 11825 | RC_AA431873_at_NA_illumina    | Homo sapiens clone 24711 mRNA             | 6744.428  |
| 11826 | RC_AA425354_at_NA_illumina    | EST: zw46e02.s1 Soares total fetus        | 6748.8623 |
| 11827 | U82311_at_NA_illumina         | Unknown protein mRNA, partial cds         | 6750.0454 |
| 11828 | D31120_at_GI_22027654-S       | Clathrin adaptor complex 1, sigma 1B      | 6750.9795 |
| 11829 | RC_AA280104_s_at_GI_21070955- | EST: zt05h09.s1 NCI_CGAP_GCB1 Homo        | 6752.7686 |
| 11830 | RC_AA350771_s_at_GI_37039609- | EST: EST58210 Infant brain Homo           | 6754.6284 |
| 11831 | RC_AA461559_at_NA_illumina    | Chromogranin A (parathyroid secretory     | 6754.668  |
| 11832 | M25667_at_GI_28872807-S       | GAP43 Growth associated protein 43        | 6756.835  |
| 11833 | R54897_at_GI_24308052-S       | Untitled                                  | 6757.058  |
| 11834 | D58019_s_at_GI_22041854-S     | EST: Human aorta cDNA 5'-end GEN-         | 6760.272  |
| 11835 | U17969_at_GI_34147551-S       | EIF5A Eukaryotic translation initiation   | 6760.9956 |
| 11836 | RC_AA252808_at_NA_illumina    | EST: zs27c02.s1 NCI_CGAP_GCB1             | 6761.2446 |
| 11837 | M36430_s_at_GI_20357526-S     | GNB1 Guanine nucleotide binding protein   | 6761.606  |
| 11838 | M11726_at_GI_42476159-S       | PPY Pancreatic polypeptide                | 6764.007  |
| 11839 | MIP1-B_at_NA_illumina         | No info for gene                          | 6764.017  |
| 11840 | Y08200_at_GI_33469950-A       | Rab geranylgeranyl transferase, alpha-    | 6764.1997 |
| 11841 | U88898_r_at_NA_illumina       | Endogenous retroviral H                   | 6764.8955 |
| 11842 | D28113_s_at_NA_illumina       | Human mRNA for MOBP (myelin-              | 6764.8984 |
| 11843 | AFFX-                         | AFFX-HUMISGF3A/M97935_MA_at               | 6765.251  |
| 11844 | AFFX-HUMISGF3A/M97935_MA_at-  | No info for gene                          | 6765.251  |
| 11845 | RC_AA056247_at_GI_31542324-S  | Homo sapiens clone 24511 mRNA             | 6768.7446 |
| 11846 | K03460_at_NA_illumina         | Alpha-tubulin isotype H2-alpha gene, last | 6770.2417 |
| 11847 | RC_AA444054_at_NA_illumina    | EST: zv45f09.s1 Soares ovary tumor        | 6772.375  |
| 11848 | M33521_at_GI_18375629-A       | LARGE PROLINE-RICH PROTEIN BAT3           | 6774.8335 |
| 11849 | RC_AA437125_at_GI_28558978-S  | EST: zv53d12.s1 Soares testis NHT Homo    | 6775.699  |
| 11850 | RC_AA113166_at_NA_illumina    | EST: zm27e01.s1 Stratagene pancreas       | 6776.108  |
| 11851 | RC_AA058354_at_NA_illumina    | EST: zl67d04.s1 Stratagene colon          | 6780.3955 |
| 11852 | RC_AA029356_at_NA_illumina    | EST: zk12d10.s1 Soares pregnant uterus    | 6780.943  |
| 11853 | RC_AA429904_at_NA_illumina    | EST: zw66d03.s1 Soares testis NHT         | 6781.925  |
| 11854 | U59831_ma1_s_at_GI_4758391-S  | Transcription factor, forkhead related    | 6783.0547 |
| 11855 | U59831_ma1_s_at-2_NA_illumina | Forkhead (Drosophila)-like 8              | 6783.0547 |
| 11856 | N71232_at_NA_illumina         | EST: yw36g09.r1 Homo sapiens cDNA         | 6792.511  |

|       |                              |                                           |           |
|-------|------------------------------|-------------------------------------------|-----------|
| 11857 | Y08374_rna1_at_GI_4557017-S  | GP-39 cartilage protein gene extracted    | 6797.355  |
| 11858 | RC_AA461169_at_GI_34147542-S | EST: zx70b06.s1 Soares total fetus        | 6797.9736 |
| 11859 | M16750_s_at_GI_31543400-S    | PIM1 Pim-1 oncogene                       | 6799.374  |
| 11860 | U37122_at_GI_45593148-A      | ADD3 Adducin 3 (gamma)                    | 6799.478  |
| 11861 | D31381_at_GI_5031666-S       | H.sapiens novel gene, similar to mouse    | 6807.8926 |
| 11862 | AA174183_s_at_NA_illumina    | EST: PTH204 HTCDL1 Homo sapiens           | 6811.424  |
| 11863 | RC_AA411711_at_NA_illumina   | EST: zv16d08.s1 Soares NhHMPu S1          | 6817.4736 |
| 11864 | RC_AA411818_at_NA_illumina   | EST: zt67b06.s1 Soares testis NHT Homo    | 6818.6606 |
| 11865 | M83088_at_GI_21361620-S      | PGM1 Phosphoglucomutase 1                 | 6819.2495 |
| 11866 | M83186_at_GI_18105034-S      | COX7A1 Cytochrome c oxidase subunit       | 6820.372  |
| 11867 | RC_AA459381_at_NA_illumina   | EST: zx89e05.s1 Soares ovary tumor        | 6820.4277 |
| 11868 | RC_AA486410_at_NA_illumina   | EST: ab36b12.s1 Stratagene HeLa cell s3   | 6820.4443 |
| 11869 | RC_AA481526_at_NA_illumina   | Homo sapiens clone 23765 mRNA             | 6821.6475 |
| 11870 | U64105_at_GI_39777602-S      | Guanine nucleotide exchange factor p115-  | 6822.2617 |
| 11871 | RC_AA479885_at_GI_7662329-S  | Homo sapiens mRNA for KIAA0843            | 6825.8516 |
| 11872 | X76534_at_GI_4505404-S       | NMB Neuromedin B                          | 6826.2896 |
| 11873 | L10333_s_at_GI_10863934-S    | Neuroendocrine-specific protein A (NSP)   | 6826.749  |
| 11874 | U19713_s_at_GI_14574565-A    | Allograft inflammatory factor-1 (AIF-1)   | 6827.8564 |
| 11875 | RC_AA461458_at_NA_illumina   | EST: zx68d06.s1 Soares total fetus        | 6827.9    |
| 11876 | AA255638_at_NA_illumina      | Thioredoxin-like, 32kD                    | 6827.9336 |
| 11877 | R77628_at_GI_38327530-A      | Insulin induced gene 1                    | 6831.42   |
| 11878 | RC_AA255546_at_GI_38044281-A | EST: zr85c12.s1 Soares NhHMPu S1          | 6831.502  |
| 11879 | RC_AA004900_at_GI_34222113-S | EST: zh94d05.s1 Soares fetal liver spleen | 6832.8765 |
| 11880 | M94556_at_GI_4507230-S       | SSBP Single-stranded DNA-binding          | 6833.1064 |
| 11881 | Y13936_at_GI_29826283-A      | Protein phosphatase 1G (formerly 2C),     | 6834.6606 |
| 11882 | AA437171_at_NA_illumina      | Homo sapiens transcriptional regulatory   | 6834.935  |
| 11883 | RC_AA186897_at_NA_illumina   | EST: zp74c05.s1 Stratagene HeLa cell s3   | 6836.2764 |
| 11884 | RC_AA598746_at_NA_illumina   | EST: ae49h07.s1 Stratagene lung           | 6836.8047 |
| 11885 | X96719_at_NA_illumina        | AICL (activation-induced C-type lectin)   | 6836.902  |
| 11886 | RC_AA465211_f_at_NA_illumina | EST: aa24e01.s1 NCI_CGAP_GCB1             | 6837.9746 |
| 11887 | RC_AA446899_at_GI_6005807-A  | EST: zw90e07.s1 Soares total fetus        | 6838.679  |
| 11888 | RC_AA365731_at_GI_31542700-S | EST: EST76567 Pineal gland II Homo        | 6838.808  |
| 11889 | RC_AA115275_at_NA_illumina   | EST: zl08g10.s1 Soares pregnant uterus    | 6840.6914 |
| 11890 | RC_AA255617_at_NA_illumina   | EST: zs31b05.s1 NCI_CGAP_GCB1             | 6840.767  |
| 11891 | RC_AA429951_at_NA_illumina   | EST: zw59a05.s1 Soares total fetus        | 6840.8506 |
| 11892 | M21904_at_GI_34147653-S      | MDU1 Antigen identified by monoclonal     | 6841.727  |
| 11893 | RC_AA017515_at_NA_illumina   | EST: ze39g08.s1 Soares retina N2b4HR      | 6842.6675 |
| 11894 | RC_AA461444_at_NA_illumina   | EST: zx68b01.s1 Soares total fetus        | 6843.2466 |
| 11895 | X58079_at_GI_5454031-S       | S100 alpha protein                        | 6843.437  |
| 11896 | RC_AA480855_at_NA_illumina   | EST: aa28a02.s1 NCI_CGAP_GCB1             | 6844.2593 |
| 11897 | RC_AA065094_at_NA_illumina   | EST: zf75e12.s1 Soares pineal gland       | 6846.129  |
| 11898 | RC_AA460939_at_GI_21361658-S | EST: zx61d03.s1 Soares total fetus        | 6846.787  |
| 11899 | RC_AA004482_at_NA_illumina   | KIAA0763 gene product                     | 6848.9834 |

|       |                              |                                               |           |
|-------|------------------------------|-----------------------------------------------|-----------|
| 11900 | RC_AA233763_at_NA_illumina   | EST: zr44a07.s1 Soares NhHMPu S1              | 6850.23   |
| 11901 | RC_AA478001_at_GI_7382489-S  | EST: zu34h07.s1 Soares ovary tumor            | 6850.3735 |
| 11902 | AA363131_at_GI_33457329-S    | EST: EST72940 Ovary II Homo sapiens           | 6850.6143 |
| 11903 | AA455812_at_NA_illumina      | Human transformer-2 alpha (htra-2 alpha)      | 6853.1147 |
| 11904 | RC_AA621720_at_NA_illumina   | Glutathione peroxidase 3 (plasma)             | 6857.917  |
| 11905 | S68805_at_GI_4503932-S       | L-arginine:glycine amidinotransferase         | 6859.506  |
| 11906 | D13643_at_GI_13375617-S      | KIAA0018 gene                                 | 6868.028  |
| 11907 | D61991_at_NA_illumina        | EST: Human aorta cDNA 5'-end GEN-             | 6868.566  |
| 11908 | M27749_at_NA_illumina        | Immunoglobulin-related 14.1 protein           | 6869.3975 |
| 11909 | RC_AA234468_at_NA_illumina   | EST: zr74h03.s1 Soares NhHMPu S1              | 6869.929  |
| 11910 | AF003521_at_GI_21704278-A    | Jagged 2                                      | 6870.2915 |
| 11911 | RC_AA258175_at_NA_illumina   | EST: zs35c12.s1 NCI_CGAP_GCB1                 | 6870.76   |
| 11912 | AA401052_at_NA_illumina      | EST: zu50f11.r1 Soares ovary tumor            | 6874.1787 |
| 11913 | L20298_at_GI_13124880-A      | Transcription factor (CBFB) mRNA, 3' end      | 6876.475  |
| 11914 | W79409_at_GI_6912279-S       | Hydroxyacyl-Coenzyme A                        | 6877.67   |
| 11915 | AA247453_at_NA_illumina      | EST: csg2876.seq.F Human fetal heart,         | 6879.8457 |
| 11916 | RC_AA447206_at_GI_31745137-S | Homo sapiens mRNA for KIAA0538                | 6881.5405 |
| 11917 | L47738_at_GI_24307954-S      | Inducible protein mRNA                        | 6882.9517 |
| 11918 | M33195_at_GI_4758343-S       | Fc-epsilon-receptor gamma-chain mRNA          | 6884.6733 |
| 11919 | RC_AA487297_at_NA_illumina   | EST: aa94h04.s1 Stratagene fetal retina       | 6884.723  |
| 11920 | RC_AA088851_s_at_NA_illumina | S-adenosylmethionine decarboxylase 1          | 6885.6606 |
| 11921 | AA479501_s_at_NA_illumina    | EST: zv21d12.r1 Soares NhHMPu S1              | 6885.8794 |
| 11922 | RC_AA242829_s_at_NA_illumina | EST: zr65f12.s1 Soares NhHMPu S1              | 6888.343  |
| 11923 | X16316_at_GI_7108366-S       | Vav oncogene                                  | 6889.3467 |
| 11924 | RC_AA255480_at_GI_20149632-S | EST: zr83c09.s1 Soares NhHMPu S1              | 6890.0596 |
| 11925 | RC_AA233257_at_GI_34147679-S | Transforming growth factor beta 1 induced     | 6892.999  |
| 11926 | AB002331_at_GI_18375620-A    | Human mRNA for KIAA0333 gene, partial         | 6894.0347 |
| 11927 | L40904_at-2_NA_illumina      | Peroxisome proliferative activated            | 6894.859  |
| 11928 | L40904_at_GI_20336230-A      | LGALS1 Ubiquinol-cytochrome c                 | 6894.859  |
| 11929 | AA311352_s_at_GI_31982912-S  | EST: EST182117 Jurkat T-cells V Homo          | 6894.9395 |
| 11930 | X93036_at_NA_illumina        | MAT8 protein                                  | 6895.347  |
| 11931 | R52420_at_GI_7662145-S       | KIAA0473 gene product                         | 6898.202  |
| 11932 | W28390_at_NA_illumina        | EST: 46c8 Human retina cDNA randomly          | 6907.9263 |
| 11933 | RC_AA599764_at_GI_6005825-S  | EST: ag33a04.s1 Jia bone marrow stroma        | 6908.0884 |
| 11934 | L20977_at_NA_illumina        | ATPase, Ca <sup>++</sup> transporting, plasma | 6908.1763 |
| 11935 | RC_AA347973_at_NA_illumina   | EST: EST54406 Fetal heart II Homo             | 6909.1606 |
| 11936 | RC_AA401144_s_at_NA_illumina | EST: zu52c05.s1 Soares ovary tumor            | 6910.676  |
| 11937 | AA232738_at_GI_10835046-S    | Sarcoglycan, epsilon                          | 6912.0996 |
| 11938 | U11292_at-2_NA_illumina      | Human Ki nuclear autoantigen mRNA,            | 6912.58   |
| 11939 | U11292_at_GI_30410793-A      | Ki nuclear autoantigen mRNA                   | 6912.58   |
| 11940 | RC_AA136345_at_NA_illumina   | EST: zn89h06.s1 Stratagene lung               | 6913.2427 |
| 11941 | M30257_s_at_GI_18201908-A    | VCAM1 Vascular cell adhesion molecule 1       | 6913.512  |
| 11942 | D82307_at_GI_39812483-A      | EST: similar to none, mRNA sequence.          | 6914.6807 |

|       |                              |                                         |           |
|-------|------------------------------|-----------------------------------------|-----------|
| 11943 | M97935_s_at_NA_illumina      | SIGNAL TRANSDUCER AND                   | 6917.4644 |
| 11944 | RC_AA599690_at_GI_45439368-S | EST: ag10g07.s1 Gessler Wilms tumor     | 6917.4805 |
| 11945 | RC_AA040394_at_GI_5729938-S  | EST: zf05h02.s1 Soares fetal heart      | 6920.4565 |
| 11946 | AA437346_at_NA_illumina      | EST: zw30c06.r1 Soares ovary tumor      | 6924.3906 |
| 11947 | RC_AA452131_at_GI_29826292-S | EST: zx15d06.s1 Soares total fetus      | 6925.048  |
| 11948 | RC_AA405199_at_GI_21361461-S | EST: zu52h04.s1 Soares ovary tumor      | 6925.344  |
| 11949 | R83496_at_GI_14149715-S      | EST: yp15c07.r1 Homo sapiens cDNA       | 6925.584  |
| 11950 | RC_AA449749_at_GI_27477718-S | EST: zx07e10.s1 Soares total fetus      | 6926.567  |
| 11951 | RC_AA233706_f_at_NA_illumina | EST: zr47e06.s1 Soares NhHMPu S1        | 6928.3174 |
| 11952 | D45304_at_GI_33598917-S      | EST: Human brain cDNA, mRNA             | 6930.935  |
| 11953 | AB002349_at_NA_illumina      | KIAA0351 gene product                   | 6931.452  |
| 11954 | H06982_at_GI_32307174-S      | TRANSCRIPTION INITIATION FACTOR         | 6931.7295 |
| 11955 | M83751_at_GI_5174392-S       | Arginine-rich protein (ARP) gene        | 6936.0474 |
| 11956 | RC_AA479515_at_NA_illumina   | EST: zv21f11.s1 Soares NhHMPu S1        | 6937.87   |
| 11957 | RC_AA085608_at_NA_illumina   | EST: zn64d02.s1 Stratagene HeLa cell s3 | 6939.5117 |
| 11958 | AA442342_at_GI_38176162-S    | EST: zv62a02.r1 Soares testis NHT Homo  | 6940.7764 |
| 11959 | T88844_at_NA_illumina        | EST: yd90b11.r1 Homo sapiens cDNA       | 6942.5854 |
| 11960 | RC_AA195660_at_NA_illumina   | EST: zr33f10.s1 Soares NhHMPu S1        | 6942.95   |
| 11961 | RC_AA257062_at_GI_37541012-S | EST: zr82a06.s1 Soares NhHMPu S1        | 6943.745  |
| 11962 | RC_AA449441_at_GI_29337297-S | EST: zx05d05.s1 Soares total fetus      | 6945.356  |
| 11963 | RC_AA459657_at_GI_34147519-S | Homo sapiens clone 23570 mRNA           | 6946.566  |
| 11964 | RC_AA454581_at_NA_illumina   | Homo sapiens mRNA for KIAA0602          | 6948.4287 |
| 11965 | D55716_at_GI_33469967-A      | DNA REPLICATION LICENSING FACTOR        | 6948.451  |
| 11966 | L16842_at_GI_4507840-S       | UQCRC1 Ubiquinol-cytochrome c           | 6950.0234 |
| 11967 | AA090687_at_NA_illumina      | EST: y1297.seq.F Fetal heart, Lambda    | 6950.179  |
| 11968 | AA203222_at_GI_5031632-S     | Homo sapiens mRNA for CDEP, complete    | 6950.856  |
| 11969 | U72507_at_NA_illumina        | 40871 mRNA partial sequence             | 6952.2246 |
| 11970 | U72507_at-2_NA_illumina      | Human 40871 mRNA partial sequence.      | 6952.2246 |
| 11971 | M36284_s_at_GI_21614516-A    | GYPC Glycophorin C (Gerbich blood       | 6953.0767 |
| 11972 | RC_AA233897_at_GI_31317306-S | EST: zr49b11.s1 Soares NhHMPu S1        | 6954.26   |
| 11973 | D82284_at_GI_21735557-A      | Homo sapiens mRNA for KIAA0733          | 6955.577  |
| 11974 | RC_AA142858_at_GI_14150127-S | EST: zl40e04.s1 Soares pregnant uterus  | 6958.182  |
| 11975 | RC_AA405737_at_NA_illumina   | EST: zu66f03.s1 Soares testis NHT Homo  | 6959.0015 |
| 11976 | W80658_at_GI_5902039-S       | EST: zd82b12.r1 Soares fetal heart      | 6960.161  |
| 11977 | U77948_at_NA_illumina        | KAI1 Kangai 1 (suppression of           | 6960.308  |
| 11978 | H23847_at_NA_illumina        | EST: yn71d04.r1 Homo sapiens cDNA       | 6961.747  |
| 11979 | R97442_s_at_GI_24430133-I    | EST: yq53b01.r1 Homo sapiens cDNA       | 6961.7876 |
| 11980 | U05255_s_at_NA_illumina      | GLYCOPHORIN B PRECURSOR                 | 6962.536  |
| 11981 | X79882_at_GI_19913411-A      | Lrp mRNA                                | 6962.537  |
| 11982 | AA166733_at_NA_illumina      | Human NAD+-specific isocitrate          | 6965.6357 |
| 11983 | C02193_at_GI_41327774-S      | EST: HUMGS0006536, Human Gene           | 6970.6543 |
| 11984 | RC_AA253031_at_NA_illumina   | EST: zr52a09.s1 Soares NhHMPu S1        | 6973.764  |
| 11985 | HG651-HT4201_at_NA_illumina  | Adducin, Alpha Subunit, Alt. Splice 2   | 6975.456  |

|       |                                |                                           |           |
|-------|--------------------------------|-------------------------------------------|-----------|
| 11986 | RC_AA282347_at_GI_7661727-S    | EST: zt12g11.s1 NCI_CGAP_GCB1 Homo        | 6977.4473 |
| 11987 | HG3638-HT3849_s_at_NA_illumina | Amyloid Beta (A4) Precursor Protein, Alt. | 6979.8364 |
| 11988 | W28082_at_NA_illumina          | Non-histone chromosome protein 2 (S.      | 6982.3574 |
| 11989 | C02049_s_at_NA_illumina        | EST: HUMGS0005552, Human Gene             | 6985.7456 |
| 11990 | AA418230_at_GI_27735132-S      | EST: zv97h11.r1 Soares NhHMPu S1          | 6985.7676 |
| 11991 | D14658_at_NA_illumina          | KIAA0102 gene                             | 6988.121  |
| 11992 | RC_AA454980_i_at_NA_illumina   | Homo sapiens zinc-finger helicase (hZFH)  | 6989.397  |
| 11993 | U85611_at_GI_9951921-S         | Snk interacting protein 2-28 mRNA         | 6993.8296 |
| 11994 | L18960_at_NA_illumina          | EIF4C Eukaryotic translation initiation   | 6994.0835 |
| 11995 | D82477_at_GI_40353209-S        | EST: similar to none, mRNA sequence.      | 6997.9644 |
| 11996 | X52022_at_NA_illumina          | RNA for type VI collagen alpha3 chain     | 7001.336  |
| 11997 | RC_AA456981_at_NA_illumina     | EST: aa90h11.s1 Stratagene fetal retina   | 7004.959  |
| 11998 | RC_AA490262_at_NA_illumina     | EST: aa44c09.s1 Soares NhHMPu S1          | 7009.3525 |
| 11999 | AA010686_at_GI_7657384-S       | EST: ze19a12.r1 Soares fetal heart        | 7010.6685 |
| 12000 | U24166_at_GI_6912493-S         | EB1 mRNA                                  | 7010.777  |
| 12001 | U57341_at_GI_5453761-S         | Neurofilament triplet L protein mRNA,     | 7013.501  |
| 12002 | RC_AA455983_at_NA_illumina     | EST: aa02b10.s1 Soares NhHMPu S1          | 7015.283  |
| 12003 | U37408_at-2_NA_illumina        | C-terminal binding protein 1              | 7020.7363 |
| 12004 | U37408_at_GI_4557496-S         | CtBP mRNA                                 | 7020.7363 |
| 12005 | U57650_at_GI_40254822-S        | Signaling inositol polyphosphate 5        | 7021.562  |
| 12006 | X58431_rna2_s_at-2_NA_illumina | HOMEBOX PROTEIN HOX-                      | 7022.9204 |
| 12007 | X58431_rna2_s_at_GI_24797136-A | HOX 2.2 gene extracted from Human         | 7022.9204 |
| 12008 | M55593_at_GI_11342665-S        | MMP2 Matrix metalloproteinase 2           | 7023.1045 |
| 12009 | Y00815_at_GI_18860895-A        | PTPRF Protein tyrosine phosphatase,       | 7023.654  |
| 12010 | RC_AA262727_at_NA_illumina     | EST: zs24a07.s1 NCI_CGAP_GCB1             | 7024.354  |
| 12011 | RC_AA405310_at_GI_37577092-A   | EST: zu13h01.s1 Soares testis NHT Homo    | 7026.55   |
| 12012 | D14657_at_GI_40255243-S        | KIAA0101 gene                             | 7032.3364 |
| 12013 | AA095904_at_GI_13376622-S      | EST: l6499.seq.F Fetal heart, Lambda      | 7034.412  |
| 12014 | X54232_at_GI_4504080-S         | GPC1 Glypican 1                           | 7035.12   |
| 12015 | AA247204_at_GI_21166354-S      | DEAD/H (Asp-Glu-Ala-Asp/His) box          | 7035.66   |
| 12016 | U69126_s_at_GI_4504864-S       | FUSE binding protein 2 (FBP2) mRNA,       | 7038.4756 |
| 12017 | RC_AA285033_at_NA_illumina     | EST: zt25f10.s1 Soares ovary tumor        | 7043.3765 |
| 12018 | RC_AA426030_s_at_NA_illumina   | EST: zv52b06.s1 Soares testis NHT Homo    | 7043.83   |
| 12019 | RC_AA399216_at_GI_14149737-S   | EST: zt57b07.s1 Soares testis NHT Homo    | 7044.463  |
| 12020 | M81601_at_GI_45439353-S        | TRANSCRIPTION ELONGATION                  | 7045.481  |
| 12021 | RC_AA233277_at_GI_27262621-S   | EST: zr48c02.s1 Soares NhHMPu S1          | 7047.1255 |
| 12022 | RC_AA039856_at_GI_37563699-S   | EST: zf03d06.s1 Soares fetal heart        | 7048.562  |
| 12023 | U31903_s_at_GI_20631976-S      | CREB-RP (creb-rp) mRNA                    | 7048.8877 |
| 12024 | L21936_at_GI_4759079-S         | SDH2 Succinate dehydrogenase 2,           | 7048.8896 |
| 12025 | RC_AA435934_at_NA_illumina     | Homo sapiens clone 24733 mRNA             | 7049.1553 |
| 12026 | U40391_rna1_at_GI_4501844-S    | Serotonin N-acetyltransferase gene        | 7051.049  |
| 12027 | D82808_at_GI_4885582-S         | Rho-associated, coiled-coil containing    | 7051.073  |
| 12028 | L37747_s_at_NA_illumina        | LAMIN B1                                  | 7051.7427 |



|       |                              |                                           |           |
|-------|------------------------------|-------------------------------------------|-----------|
| 12029 | RC_AA470153_at_GI_41152057-S | Homo sapiens mRNA for KIAA0880            | 7053.7373 |
| 12030 | L22524_s_at_GI_13027804-S    | MATRILYSIN PRECURSOR                      | 7055.4233 |
| 12031 | Z14244_at_GI_18105038-S      | COX7B Cytochrome c oxidase subunit VIIb   | 7055.539  |
| 12032 | RC_AA489027_at_NA_illumina   | EST: aa56b09.s1 NCI_CGAP_GCB1             | 7058.2236 |
| 12033 | U01337_at_NA_illumina        | ARAF1 V-raf murine sarcoma 3611 viral     | 7059.046  |
| 12034 | U90313_at_GI_4758483-S       | Glutathione-S-transferase homolog mRNA    | 7063.636  |
| 12035 | RC_AA446461_at_GI_38045933-A | EST: zw65b07.s1 Soares testis NHT         | 7065.458  |
| 12036 | N40141_at_NA_illumina        | Homo sapiens mRNA for JM27 protein,       | 7065.766  |
| 12037 | M75126_at_GI_4504390-A       | HK1 Hexokinase 1                          | 7069.3135 |
| 12038 | Z19002_at_NA_illumina        | ZINC FINGER PROTEIN PLZF                  | 7073.508  |
| 12039 | RC_AA404487_at_GI_13899316-S | EST: zw38a06.s1 Soares total fetus        | 7078.103  |
| 12040 | AB002390_at_NA_illumina      | Human mRNA for KIAA0392 gene, partial     | 7080.167  |
| 12041 | RC_AA495803_at_NA_illumina   | EST: zw05b10.s1 Soares NhHMPu S1          | 7080.9014 |
| 12042 | U45975_at_GI_24307956-S      | Phosphatidylinositol (4,5)bisphosphate 5- | 7081.9673 |
| 12043 | U65581_at_GI_16579883-S      | Ribosomal protein L3-like mRNA            | 7082.692  |
| 12044 | U32169_rna2_s_at_NA_illumina | Collagen, type XI, alpha 2                | 7082.949  |
| 12045 | RC_AA039854_at_NA_illumina   | EST: zf03c08.s1 Soares fetal heart        | 7084.003  |
| 12046 | RC_AA281361_at_NA_illumina   | EST: zs96a03.s1 NCI_CGAP_GCB1             | 7086.7207 |
| 12047 | RC_AA405495_at_NA_illumina   | EST: zw36d03.s1 Soares total fetus        | 7089.9556 |
| 12048 | RC_AA046619_at_NA_illumina   | EST: zf12b10.s1 Soares fetal heart        | 7092.5776 |
| 12049 | C02548_s_at_GI_37544578-S    | EST: HUMGS0012448, Human Gene             | 7093.028  |
| 12050 | H93246_s_at_GI_38505217-S    | EST: yv05g02.r1 Homo sapiens cDNA         | 7093.982  |
| 12051 | AA454070_at_GI_21264568-A    | EST: zx48g04.r1 Soares testis NHT Homo    | 7095.2227 |
| 12052 | M38449_s_at_GI_10863872-S    | Transforming growth factor-beta mRNA,     | 7096.826  |
| 12053 | L37112_at_NA_illumina        | AVPR1B Arginine vasopressin receptor 1B   | 7099.2837 |
| 12054 | RC_AA453522_at_GI_13376847-S | EST: zx47g10.s1 Soares testis NHT Homo    | 7100.483  |
| 12055 | RC_AA454980_r_at_NA_illumina | Homo sapiens zinc-finger helicase (hZFH)  | 7101.4653 |
| 12056 | RC_AA436853_at_NA_illumina   | EST: zv59e02.s1 Soares testis NHT Homo    | 7103.1323 |
| 12057 | RC_AA598988_at_NA_illumina   | EST: ae34e07.s1 Gessler Wilms tumor       | 7105.8643 |
| 12058 | RC_AA410381_at_GI_4885602-S  | EST: zv16b12.s1 Soares NhHMPu S1          | 7107.8667 |
| 12059 | AA041208_at_GI_4826853-S     | EST: zf07b02.r1 Soares fetal heart        | 7111.9395 |
| 12060 | RC_AA065173_at_NA_illumina   | EST: zm50c11.s1 Stratagene fibroblast     | 7112.8047 |
| 12061 | RC_AA372018_at_NA_illumina   | EST: EST83940 Parathyroid gland tumor I   | 7114.8423 |
| 12062 | RC_AA147537_at_NA_illumina   | EST: zl52a07.s1 Soares pregnant uterus    | 7115.6704 |
| 12063 | U49973_xpt1_at_NA_illumina   | ORF1; MER37; putative transposase         | 7116.2183 |
| 12064 | D26579_at-2_NA_illumina      | A disintegrin and metalloprotease domain  | 7116.5796 |
| 12065 | D26579_at_GI_4557252-S       | Transmembrane protein                     | 7116.5796 |
| 12066 | R76363_at_NA_illumina        | Homo sapiens Chromosome 16 BAC clone      | 7122.0137 |
| 12067 | RC_AA456135_at_GI_27734694-S | EST: zx65e12.s1 Soares total fetus        | 7124.525  |
| 12068 | AA247497_at_NA_illumina      | EST: csg3770.seq.F Human fetal heart,     | 7126.3804 |
| 12069 | RC_AA430674_at_NA_illumina   | EST: zw26d12.s1 Soares ovary tumor        | 7127.3643 |
| 12070 | U39318_at_GI_33149323-A      | AF-4 mRNA                                 | 7131.224  |
| 12071 | X14487_rna1_s_at_NA_illumina | Keratin 10 (epidermolytic hyperkeratosis; | 7136.617  |

|       |                                |                                            |           |
|-------|--------------------------------|--------------------------------------------|-----------|
| 12072 | U87459_at-2_NA_illumina        | Cancer/testis antigen                      | 7139.9272 |
| 12073 | U87459_at_NA_illumina          | Autoimmunogenic cancer/testis antigen      | 7139.9272 |
| 12074 | AA147543_at_GI_4504626-S       | Immunoglobulin superfamily, member 3       | 7141.017  |
| 12075 | D32050_at_GI_4501840-S         | AARS Alanyl-tRNA synthetase                | 7141.3735 |
| 12076 | RC_AA262308_at_NA_illumina     | EST: zr70g10.s1 Soares NhHMPu S1           | 7143.3984 |
| 12077 | RC_AA429472_at_GI_34147330-S   | EST: zw34b09.s1 Soares ovary tumor         | 7144.889  |
| 12078 | N41739_f_at_NA_illumina        | EST: yw87g06.r1 Homo sapiens cDNA          | 7149.5347 |
| 12079 | J02874_at_GI_4557578-S         | FABP4 Fatty acid binding protein 4,        | 7149.7246 |
| 12080 | RC_AA412149_at_NA_illumina     | KIAA0480 gene product                      | 7150.6323 |
| 12081 | RC_AA406377_i_at_NA_illumina   | EST: zv10d03.s1 Soares NhHMPu S1           | 7151.7373 |
| 12082 | RC_AA242757_at_NA_illumina     | EST: zr65b05.s1 Soares NhHMPu S1           | 7152.264  |
| 12083 | M22976_at_GI_4503182-S         | CYB5 Cytochrome b-5                        | 7152.7725 |
| 12084 | RC_AA403159_at_NA_illumina     | EST: zv65c07.s1 Soares total fetus         | 7154.1353 |
| 12085 | D29643_at_GI_34147559-S        | KIAA0115 gene                              | 7154.307  |
| 12086 | U49785_at_GI_5453630-S         | DCT Dopachrome tautomerase                 | 7156.475  |
| 12087 | AA446695_at_GI_10863946-S      | Cyclin D-binding Myb-like protein          | 7157.1494 |
| 12088 | R23122_at_GI_20977540-S        | EST: yh27c12.r1 Homo sapiens cDNA          | 7158.283  |
| 12089 | RC_AA029597_at_NA_illumina     | Bone morphogenetic protein 7 (osteogenic   | 7160.6006 |
| 12090 | M99578_s_at_GI_41152096-S      | Human lymphocyte surface protein exons     | 7161.5923 |
| 12091 | AA094023_at_GI_40217845-S      | Homo sapiens exportin t mRNA, complete     | 7162.6826 |
| 12092 | M29874_s_at_NA_illumina        | CYP2B6 Cytochrome P450, subfamily IIB      | 7165.4243 |
| 12093 | RC_AA100437_at_NA_illumina     | EST: zn59e02.s1 Stratagene muscle          | 7166.666  |
| 12094 | HG3527-HT3721_f_at_NA_illumina | Luteinizing Hormone, Beta Subunit          | 7167.2324 |
| 12095 | X06700_s_at_GI_15149480-S      | COL3A1 Alpha-1 type 3 collagen             | 7167.88   |
| 12096 | L19067_at_GI_11496238-S        | TRANSCRIPTION FACTOR P65                   | 7171.095  |
| 12097 | RC_AA460935_at_NA_illumina     | EST: zx61c09.s1 Soares total fetus         | 7174.7334 |
| 12098 | RC_AA227968_at_GI_13128863-S   | Histone deacetylase 6                      | 7176.659  |
| 12099 | T86796_at_GI_23397651-S        | EST: yd86e07.r1 Homo sapiens cDNA          | 7180.7256 |
| 12100 | RC_AA406371_at_NA_illumina     | EST: zv10c09.s1 Soares NhHMPu S1           | 7183.8857 |
| 12101 | R64459_at_NA_illumina          | OX-2 MEMBRANE GLYCOPROTEIN                 | 7186.823  |
| 12102 | RC_AA453473_at_GI_42660569-S   | EST: zx45d07.s1 Soares testis NHT Homo     | 7186.973  |
| 12103 | C01747_at_NA_illumina          | EST: HUMGS0003679, Human Gene              | 7190.275  |
| 12104 | RC_AA432197_f_at_NA_illumina   | EST: zw71h11.s1 Soares testis NHT          | 7192.265  |
| 12105 | RC_AA598675_at_GI_24431981-S   | EST: ae40b02.s1 Gessler Wilms tumor        | 7192.6284 |
| 12106 | RC_AA426022_at_NA_illumina     | EST: zw49h10.s1 Soares total fetus         | 7198.91   |
| 12107 | RC_AA448280_at_NA_illumina     | EST: zw83h05.s1 Soares testis NHT          | 7201.5986 |
| 12108 | U43077_at_GI_39995072-S        | CDC37 homolog mRNA                         | 7203.4624 |
| 12109 | RC_AA431470_at_GI_32483384-A   | EST: zw70h05.s1 Soares testis NHT          | 7204.0083 |
| 12110 | RC_AA437119_s_at_NA_illumina   | EST: zv53d05.s1 Soares testis NHT Homo     | 7206.0645 |
| 12111 | RC_AA425382_at_GI_23308573-S   | EST: zw46h11.s1 Soares total fetus         | 7211.289  |
| 12112 | D90097_at_GI_20070311-S        | ALPHA-AMYLASE 2B PRECURSOR                 | 7212.033  |
| 12113 | RC_AA417884_at_GI_17981698-A   | Cyclin-dependent kinase inhibitor 2C (p18, | 7217.9873 |
| 12114 | RC_AA399251_at_GI_7656974-S    | EST: zt57e02.s1 Soares testis NHT Homo     | 7218.802  |

|       |                               |                                           |           |
|-------|-------------------------------|-------------------------------------------|-----------|
| 12115 | AA445944_at_GI_40805859-S     | Tumor protein D52-like 2                  | 7228.374  |
| 12116 | AA410353_s_at_GI_34222201-S   | EST: zv11f02.r1 Soares NhHMPu S1          | 7233.0703 |
| 12117 | M68874_at_GI_23943919-S       | PLA2G4 Phospholipase A2, group IV         | 7233.2246 |
| 12118 | RC_AA448282_at_GI_38679908-S  | EST: zw83h07.s1 Soares testis NHT         | 7239.9    |
| 12119 | RC_AA147067_at_NA_illumina    | EST: zo32a02.s1 Stratagene colon          | 7240.226  |
| 12120 | R73982_at_NA_illumina         | EST: yi56e02.r1 Homo sapiens cDNA         | 7243.8447 |
| 12121 | L37043_at_GI_40549399-A       | CSNK1E Casein kinase 1, epsilon           | 7244.921  |
| 12122 | M13452_s_at_GI_27436944-A     | LMNA Lamin A                              | 7252.8394 |
| 12123 | L03532_at_GI_14141153-A       | M4 protein mRNA                           | 7255.7334 |
| 12124 | RC_AA025911_at_GI_7705768-S   | EST: ze90h08.s1 Soares fetal heart        | 7260.176  |
| 12125 | RC_AA598820_at_NA_illumina    | Homo sapiens TLS-associated protein       | 7263.2812 |
| 12126 | W81053_at_NA_illumina         | Homo sapiens clone 23716 mRNA             | 7263.297  |
| 12127 | U68566_at_GI_13435355-S       | HS1 binding protein HAX-1 mRNA, nuclear   | 7263.466  |
| 12128 | AA226865_at_GI_33859832-S     | EST: zr20f01.r1 Stratagene NT2 neuronal   | 7264.1978 |
| 12129 | D15057_at_GI_4503252-S        | DEFENDER AGAINST CELL DEATH 1             | 7270.03   |
| 12130 | RC_AA281545_at_NA_illumina    | Radixin                                   | 7270.4375 |
| 12131 | RC_AA256365_s_at_GI_41327740- | Homo sapiens mRNA expressed in thyroid    | 7271.269  |
| 12132 | Z30643_at_GI_31542310-S       | Chloride channel (putative) 2139bp        | 7272.2505 |
| 12133 | RC_AA609417_at_NA_illumina    | EST: zu72c03.s1 Soares testis NHT Homo    | 7273.4097 |
| 12134 | RC_AA250968_s_at_NA_illumina  | Ran GTPase activating protein 1           | 7273.4272 |
| 12135 | RC_AA427625_at_NA_illumina    | EST: zw30d09.s1 Soares ovary tumor        | 7274.02   |
| 12136 | N42747_at_GI_4758689-S        | Leucine rich repeat (in FLII) interacting | 7275.945  |
| 12137 | X63578_rna1_at_GI_4506334-S   | Parvalbumin                               | 7276.7334 |
| 12138 | RC_AA010358_at_GI_37547173-S  | Homo sapiens clone 23741 mRNA             | 7279.0645 |
| 12139 | J03802_s_at_NA_illumina       | Parathyroid hormone-like hormone          | 7279.5757 |
| 12140 | RC_AA029699_s_at_NA_illumina  | KIAA0476 gene product                     | 7281.128  |
| 12141 | RC_AA443753_at_GI_27437022-A  | Homo sapiens mRNA for KIAA0787            | 7283.846  |
| 12142 | U52969_at_GI_5453857-S        | BRAIN SPECIFIC POLYPEPTIDE PEP-19         | 7286.4526 |
| 12143 | RC_AA282791_at_NA_illumina    | EST: zs91c05.s1 NCI_CGAP_GCB1             | 7287.7075 |
| 12144 | X04828_at_GI_4504040-S        | GNAI2 Guanine nucleotide binding protein  | 7289.2456 |
| 12145 | RC_AA449951_at_GI_6631114-S   | EST: zx38a10.s1 Soares total fetus        | 7292.1953 |
| 12146 | X83618_at_GI_5031750-S        | Clone HSH1 HMG CoA synthase mRNA,         | 7293.1543 |
| 12147 | U31449_at_GI_21265109-S       | Intestinal and liver tetraspan membrane   | 7293.882  |
| 12148 | RC_AA410413_at_GI_40255249-S  | EST: zv32g09.s1 Soares ovary tumor        | 7297.2485 |
| 12149 | RC_AA435780_at_NA_illumina    | EST: zt77c11.s1 Soares testis NHT Homo    | 7297.267  |
| 12150 | RC_AA417079_at_NA_illumina    | EST: zu13c03.s1 Soares testis NHT Homo    | 7298.954  |
| 12151 | L44334_at_GI_41281538-S       | EST: Homo sapiens thymus mRNA             | 7304.158  |
| 12152 | AA430981_at_GI_41281541-S     | EST: PMY0792 KG1-a Lambda Zap             | 7304.826  |
| 12153 | RC_AA252765_at_NA_illumina    | EST: zs27d03.s1 NCI_CGAP_GCB1             | 7305.18   |
| 12154 | RC_AA234384_s_at_NA_illumina  | EST: zr75a11.s1 Soares NhHMPu S1          | 7305.793  |
| 12155 | RC_AA421267_at_GI_30089947-S  | EST: zu06b05.s1 Soares testis NHT Homo    | 7305.801  |
| 12156 | D79986_at_NA_illumina         | KIAA0164 gene                             | 7308.4907 |
| 12157 | RC_AA610089_at_GI_4758555-S   | U4/U6-associated RNA splicing factor      | 7309.3345 |

|       |                                |                                           |           |
|-------|--------------------------------|-------------------------------------------|-----------|
| 12158 | AA036809_at_NA_illumina        | EST: zk32h09.r1 Soares pregnant uterus    | 7313.8413 |
| 12159 | RC_AA453304_at_NA_illumina     | EST: zx32b10.s1 Soares total fetus        | 7319.1646 |
| 12160 | D82277_s_at_GI_7705880-S       | EST: similar to none, mRNA sequence.      | 7319.2803 |
| 12161 | U76388_at-2_NA_illumina        | Human steroidogenic factor 1 mRNA,        | 7319.7153 |
| 12162 | U76388_at_NA_illumina          | Steroidogenic factor 1 mRNA               | 7319.7153 |
| 12163 | RC_AA279481_at_NA_illumina     | EST: zs88h04.s1 NCI_CGAP_GCB1             | 7323.8384 |
| 12164 | RC_AA427537_at_NA_illumina     | EST: zw22c08.s1 Soares ovary tumor        | 7326.977  |
| 12165 | RC_AA477748_at_NA_illumina     | Homo sapiens clone 24775 mRNA             | 7327.5996 |
| 12166 | AA488103_at_NA_illumina        | EST: ad07a08.r1 Soares NbHFB Homo         | 7330.6367 |
| 12167 | RC_D51069_f_at_NA_illumina     | CELL SURFACE GLYCOPROTEIN                 | 7332.9893 |
| 12168 | AA250870_s_at_GI_27477133-S    | Homo sapiens mRNA for KIAA0906            | 7333.071  |
| 12169 | RC_AA443941_at_GI_4507702-S    | EST: zv51c06.s1 Soares testis NHT Homo    | 7335.737  |
| 12170 | RC_AA620806_at_GI_22208950-A   | EST: af95c05.s1 Soares testis NHT Homo    | 7339.225  |
| 12171 | M27394_s_at_GI_23110986-A      | B-lymphocyte cell-surface antigen B1      | 7340.7437 |
| 12172 | U39840_at_GI_24497500-S        | Hepatocyte nuclear factor-3 alpha (HNF-3  | 7343.617  |
| 12173 | RC_AA102652_at_GI_34147687-S   | EST: zn73b01.s1 Stratagene NT2            | 7343.6597 |
| 12174 | AA104023_at_NA_illumina        | EST: I7134.seq.F Fetal heart, Lambda      | 7343.9814 |
| 12175 | D85758_at_GI_4758301-S         | Enhancer of rudimentary homolog mRNA      | 7345.008  |
| 12176 | RC_AA504467_at_NA_illumina     | HEAT SHOCK 70 KD PROTEIN 1                | 7348.497  |
| 12177 | RC_AA430388_at_GI_37059740-S   | EST: zw23c04.s1 Soares ovary tumor        | 7355.8936 |
| 12178 | AA345469_s_at_GI_21914861-A    | EST: EST51569 Gall bladder II Homo        | 7356.9424 |
| 12179 | D83174_s_at_GI_32454740-S      | CBP1 Collagen-binding protein 1           | 7357.6167 |
| 12180 | RC_AA621041_at_NA_illumina     | EST: ag03e04.s1 Soares testis NHT Homo    | 7357.8374 |
| 12181 | RC_AA398318_at_GI_21314788-S   | KIAA0331 gene product                     | 7358.2744 |
| 12182 | RC_AA253459_at_NA_illumina     | EST: zs06f01.s1 NCI_CGAP_GCB1 Homo        | 7359.898  |
| 12183 | RC_AA620587_at_NA_illumina     | EST: ae60g06.s1 Stratagene lung           | 7361.19   |
| 12184 | RC_AA410424_at_NA_illumina     | Human DEAD-box protein p72 (P72)          | 7368.1235 |
| 12185 | D81705_at_GI_45243550-S        | EST: Human fetal brain cDNA 5'-end GEN-   | 7370.245  |
| 12186 | W35309_at_GI_13994299-S        | EST: zc70e09.r1 Soares fetal heart        | 7371.722  |
| 12187 | D78611_at_GI_29294636-A        | MEST Mesoderm specific transcript         | 7374.4775 |
| 12188 | RC_AA599950_at_NA_illumina     | EST: ag24h08.s1 Jia bone marrow stroma    | 7374.504  |
| 12189 | RC_AA394162_at_GI_24475639-S   | EST: zt52c08.s1 Soares ovary tumor        | 7377.8423 |
| 12190 | R37560_at_GI_31377795-S        | Myotubularin related protein 4            | 7379.521  |
| 12191 | AA448456_at_NA_illumina        | EST: zw96h10.r1 Soares total fetus        | 7381.404  |
| 12192 | RC_AA234957_at_NA_illumina     | Homo sapiens mRNA for MTMR1 protein       | 7382.5264 |
| 12193 | RC_AA410972_at_GI_13124893-S   | EST: zv03f01.s1 Soares NhHMPu S1          | 7386.302  |
| 12194 | RC_AA227871_at_GI_21614526-S   | EST: zr28h08.s1 Stratagene NT2 neuronal   | 7388.415  |
| 12195 | M96803_at_GI_30315657-A        | SPTBN1 Spectrin, beta, non-erythrocytic 1 | 7390.809  |
| 12196 | AA401851_at_GI_26638656-S      | EST: zv66f11.r1 Soares total fetus        | 7392.386  |
| 12197 | Z35402_rna1_s_at_GI_14589887-S | Gene encoding E-cadherin, exon 3 and      | 7392.4604 |
| 12198 | X02160_at-2_NA_illumina        | Insulin receptor                          | 7394.8584 |
| 12199 | X02160_at_NA_illumina          | INSR Insulin receptor                     | 7394.8584 |
| 12200 | RC_AA428204_at_GI_28558974-S   | EST: zw51c11.s1 Soares total fetus        | 7396.0303 |

|       |                               |                                               |           |
|-------|-------------------------------|-----------------------------------------------|-----------|
| 12201 | M24248_at_NA_illumina         | MYL3 Myosin, light polypeptide 3, alkali;     | 7396.6396 |
| 12202 | J05125_at_GI_10834999-S       | PNLIP Pancreatic lipase                       | 7398.452  |
| 12203 | RC_AA406233_at_GI_39725655-S  | EST: zv10e07.s1 Soares NhHMPu S1              | 7399.33   |
| 12204 | X75252_at_GI_38016928-S       | PBP Prostatic binding protein                 | 7399.9863 |
| 12205 | RC_AA490904_at_NA_illumina    | EST: aa52b07.s1 NCI_CGAP_GCB1                 | 7400.056  |
| 12206 | RC_AA227261_at_GI_37540396-S  | EST: zr22h04.s1 Stratagene NT2 neuronal       | 7400.9365 |
| 12207 | RC_AA063428_r_at_NA_illumina  | Neuronal adaptin-like protein, beta-subunit   | 7401.5425 |
| 12208 | AA374109_at_GI_6912681-S      | EST: EST86231 HSC172 cells I Homo             | 7402.0737 |
| 12209 | AA366403_at_NA_illumina       | EST: EST77370 Pancreas tumor III Homo         | 7403.7314 |
| 12210 | H12674_at_NA_illumina         | RNA binding motif, single stranded            | 7404.2026 |
| 12211 | H44269_at_GI_31377664-S       | EST: yp17b05.r1 Homo sapiens cDNA             | 7406.3774 |
| 12212 | RC_AA262472_at_GI_9507222-S   | EST: zs17g03.s1 NCI_CGAP_GCB1                 | 7407.061  |
| 12213 | RC_AA347964_at_GI_8051601-S   | EST: EST54397 Fetal heart II Homo             | 7408.7344 |
| 12214 | U73843_at_GI_21361107-S       | Epithelial-specific transcription factor ESE- | 7410.1606 |
| 12215 | AB002378_at_GI_38026914-A     | KIAA0380 gene product                         | 7414.4414 |
| 12216 | RC_AA451667_at_NA_illumina    | RAB9, member RAS oncogene family              | 7414.5044 |
| 12217 | RC_AA450126_at_GI_21361946-S  | EST: zx42f05.s1 Soares total fetus            | 7414.9336 |
| 12218 | H55437_at_NA_illumina         | EST: CHR220376 Homo sapiens genomic           | 7416.2993 |
| 12219 | AA194091_at_GI_33667027-S     | EST: zr37a11.r1 Soares NhHMPu S1              | 7416.749  |
| 12220 | RC_AA293263_at_GI_22095370-S  | EST: zt28b05.s1 Soares ovary tumor            | 7419.8213 |
| 12221 | H72650_at_NA_illumina         | Yu05d11.r1 Homo sapiens cDNA clone            | 7429.522  |
| 12222 | U47025_s_at_GI_34577123-S     | PYGB Glycogen phosphorylase B (brain          | 7431.0806 |
| 12223 | L25878_s_at_GI_4557560-S      | EPHX1 Epoxide hydrolase 1, microsomal         | 7431.7036 |
| 12224 | RC_AA282518_at_NA_illumina    | EST: zs90b04.s1 NCI_CGAP_GCB1                 | 7432.7896 |
| 12225 | RC_AA082848_at_GI_18379339-A  | Suppressor of actin mutations 2, yeast,       | 7432.8726 |
| 12226 | H44262_at_GI_4505718-S        | Peroxisomal biogenesis factor 11B             | 7434.8037 |
| 12227 | H16603_at_GI_40538725-I       | Homo sapiens novel antagonist of FGF          | 7436.2456 |
| 12228 | RC_AA485443_at_NA_illumina    | Homo sapiens hypothetical SBBI03 protein      | 7436.2974 |
| 12229 | RC_AA417929_at_GI_11037064-S  | Homo sapiens mRNA for KIAA0457                | 7438.1846 |
| 12230 | RC_AA135850_at_NA_illumina    | EST: zn93h01.s1 Stratagene lung               | 7440.63   |
| 12231 | RC_AA620453_f_at_GI_5453999-S | EST: ae58d04.s1 Stratagene lung               | 7445.7324 |
| 12232 | X74142_at-2_NA_illumina       | Forkhead (Drosophila)-like 1                  | 7445.8213 |
| 12233 | X74142_at_GI_32307176-S       | HBF-1 mRNA for transcription factor           | 7445.8213 |
| 12234 | RC_AA436569_at_GI_29294652-I  | Collagen, type III, alpha 1 (Ehlers-Danlos    | 7446.2124 |
| 12235 | RC_AA037386_s_at_GI_42734334- | EST: zc03d06.s1 Soares parathyroid            | 7451.174  |
| 12236 | AA464051_s_at_GI_16357473-S   | EST: zx86d04.r1 Soares ovary tumor            | 7451.6714 |
| 12237 | RC_AA461057_at_NA_illumina    | Nuclear localization signal deleted in        | 7452.749  |
| 12238 | RC_AA251902_at_NA_illumina    | Homo sapiens lysophospholipase (LPL1)         | 7453.1855 |
| 12239 | RC_AA463234_at_NA_illumina    | KIAA0792 gene product                         | 7453.522  |
| 12240 | RC_AA465660_at_GI_39725686-S  | LIM domain binding 1                          | 7460.7266 |
| 12241 | RC_AA397916_i_at_NA_illumina  | EST: zt58h08.s1 Soares testis NHT Homo        | 7463.5566 |
| 12242 | RC_AA609462_at_NA_illumina    | EST: zu72g10.s1 Soares testis NHT Homo        | 7466.096  |
| 12243 | AA136326_s_at_GI_21361534-S   | EST: zk93h01.r1 Soares pregnant uterus        | 7467.0815 |

|       |                                |                                           |           |
|-------|--------------------------------|-------------------------------------------|-----------|
| 12244 | AA012864_at_NA_illumina        | Ze34d10.r1 Soares retina N2b4HR Homo      | 7467.1113 |
| 12245 | D83920_at_GI_8051583-S         | FCN1 Ficolin (collagen/fibrinogen domain- | 7469.9717 |
| 12246 | AA134178_s_at_GI_7706352-S     | EST: zo18f10.r1 Stratagene colon          | 7471.124  |
| 12247 | H50398_at_GI_5032100-S         | Human multidrug resistance-associated     | 7472.613  |
| 12248 | RC_AA135095_at_NA_illumina     | Homo sapiens Sox-like transcriptional     | 7473.391  |
| 12249 | AA448419_at_GI_24762231-S      | EST: zw68g09.r1 Soares testis NHT Homo    | 7476.4565 |
| 12250 | RC_AA017045_at_NA_illumina     | EST: ze37d11.s1 Soares retina N2b4HR      | 7478.369  |
| 12251 | H03686_f_at_NA_illumina        | Human GAP SH3 binding protein mRNA,       | 7479.5684 |
| 12252 | X53961_at_GI_4505042-S         | LTF Lactotransferrin                      | 7480.32   |
| 12253 | RC_AA459278_s_at_NA_illumina   | Homo sapiens connector enhancer of KSR-   | 7484.872  |
| 12254 | AA046768_at_NA_illumina        | Homo sapiens clone TUA8 Cri-du-chat       | 7488.262  |
| 12255 | RC_AA449099_at_NA_illumina     | EST: zx06d08.s1 Soares total fetus        | 7488.666  |
| 12256 | X79536_at_NA_illumina          | HNRPA1 Heterogeneous nuclear              | 7493.6807 |
| 12257 | T34963_at_GI_32401444-S        | Homo sapiens clone 24523 mRNA             | 7500.354  |
| 12258 | RC_AA427889_at_NA_illumina     | H.sapiens gene from PAC 42616, similar to | 7501.0635 |
| 12259 | U94352_at_NA_illumina          | Manic fringe (Drosophila) homolog         | 7502.1367 |
| 12260 | RC_AA456612_at_GI_26667164-S   | EST: zx75c01.s1 Soares ovary tumor        | 7503.145  |
| 12261 | AA234791_at_GI_40254885-S      | Human DNA sequence from clone 753P9       | 7508.434  |
| 12262 | D50663_at_GI_5730084-S         | CW-1 mRNA                                 | 7509.1567 |
| 12263 | AA046548_at_GI_21264354-S      | SWI/SNF related, matrix associated, actin | 7510.6704 |
| 12264 | RC_AA207103_at_NA_illumina     | EST: zq81b03.s1 Stratagene hNT neuron     | 7511.6406 |
| 12265 | AA328993_s_at_NA_illumina      | EST: EST32546 Embryo, 12 week I Homo      | 7512.022  |
| 12266 | RC_AA040945_at_NA_illumina     | EST: zk48h08.s1 Soares pregnant uterus    | 7512.767  |
| 12267 | RC_AA232686_i_at_NA_illumina   | EST: zr75d05.s1 Soares NhHMPu S1          | 7514.4346 |
| 12268 | RC_AA476450_at_GI_45439315-I   | Homo sapiens cyclophilin-33A (CYP-33)     | 7515.3013 |
| 12269 | AA232837_at_GI_13775237-S      | EST: zr44g03.r1 Soares NhHMPu S1          | 7519.3345 |
| 12270 | X78565_at_NA_illumina          | HXB Hexabrachion (tenascin C, cytotactin) | 7521.3984 |
| 12271 | HG4535-HT4940_s_at_NA_illumina | Dematin                                   | 7521.879  |
| 12272 | RC_AA598450_at_NA_illumina     | EST: ae48g01.s1 Stratagene lung           | 7522.033  |
| 12273 | RC_AA620830_at_GI_37547052-S   | EST: af95f01.s1 Soares testis NHT Homo    | 7524.8657 |
| 12274 | RC_AA411532_at_GI_21464106-A   | EST: zv27d12.s1 Soares ovary tumor        | 7526.0215 |
| 12275 | RC_AA279442_at_NA_illumina     | EST: zs84g01.s1 NCI_CGAP_GCB1             | 7532.904  |
| 12276 | RC_AA411829_at_NA_illumina     | EST: zt67c09.s1 Soares testis NHT Homo    | 7533.106  |
| 12277 | S69272_s_at_GI_41152085-S      | Cytoplasmic antiproteinase                | 7535.6313 |
| 12278 | AA095812_at_GI_27501445-S      | Density-regulated protein                 | 7538.5913 |
| 12279 | J05249_at_GI_34147622-S        | RPA2 Replication protein A2 (32kD)        | 7539.507  |
| 12280 | AA092299_at_NA_illumina        | EST: ll6534.seq.F Fetal heart, Lambda     | 7540.33   |
| 12281 | RC_AA040699_at_NA_illumina     | EST: zk48g04.s1 Soares pregnant uterus    | 7548.327  |
| 12282 | J04611_at_NA_illumina          | G22P1 Thyroid autoantigen 70kD (Ku        | 7550.8086 |
| 12283 | AA195678_at_GI_33188444-A      | Homo sapiens mRNA for KIAA0465            | 7551.3716 |
| 12284 | D50918_at-2_NA_illumina        | Human mRNA for KIAA0128 gene, partial     | 7552.288  |
| 12285 | D50918_at_NA_illumina          | KIAA0128 gene, partial cds                | 7552.288  |
| 12286 | RC_AA609629_at_NA_illumina     | EST: af15h05.s1 Soares testis NHT Homo    | 7557.1675 |

|       |                                |                                           |           |
|-------|--------------------------------|-------------------------------------------|-----------|
| 12287 | N75203_s_at_NA_illumina        | EST: yw33e05.r1 Homo sapiens cDNA         | 7557.9404 |
| 12288 | Z37986_at_GI_5729809-S         | Phenylalkylamine binding protein          | 7562.1553 |
| 12289 | R16007_at_NA_illumina          | Ubiquitin-conjugating enzyme E2N          | 7563.6885 |
| 12290 | U32986_s_at_GI_13435358-S      | DDB1 Damage-specific DNA binding          | 7564.632  |
| 12291 | RC_AA292093_at_NA_illumina     | Homo sapiens mRNA for KIAA0530            | 7565.5034 |
| 12292 | Z35227_at-2_NA_illumina        | Ras homolog gene family, member H         | 7566.4146 |
| 12293 | Z35227_at_NA_illumina          | TTF mRNA for small G protein              | 7566.4146 |
| 12294 | N91193_at_GI_22094142-I        | EST: za13b03.r1 Soares fetal liver spleen | 7568.623  |
| 12295 | D62633_f_at_NA_illumina        | EST: Human aorta cDNA 5'-end GEN-         | 7569.6523 |
| 12296 | RC_AA262969_f_at_GI_31543450-S | EST: zr71c02.s1 Soares NhHMPu S1          | 7573.6953 |
| 12297 | RC_AA399592_s_at_NA_illumina   | Homo sapiens Dim1p homolog (hdim1+)       | 7574.4756 |
| 12298 | AA495758_s_at_NA_illumina      | EST: zw04d05.r1 Soares NhHMPu S1          | 7579.8833 |
| 12299 | M34539_at_GI_17149835-A        | FKBP1 FK506-binding protein 1 (12kD)      | 7581.0205 |
| 12300 | X96506_s_at_GI_18426972-S      | NC2 alpha subunit                         | 7583.642  |
| 12301 | RC_AA404602_at_GI_38016948-A   | Homo sapiens mRNA for KIAA0634            | 7584.177  |
| 12302 | D30755_at_GI_21361267-S        | VIM Vimentin                              | 7584.867  |
| 12303 | D30755_at-2_NA_illumina        | Human mRNA for KIAA0113 gene, partial     | 7584.867  |
| 12304 | RC_AA164851_at_NA_illumina     | EST: zp02c11.s1 Stratagene ovarian        | 7587.6836 |
| 12305 | X57398_at_NA_illumina          | NME1 Non-metastatic cells 1, protein      | 7589.015  |
| 12306 | X55448_cds1_s_at_GI_21614519-S | G6PD gene (glucose-6-phosphate            | 7589.6865 |
| 12307 | R13638_at_NA_illumina          | EST: yf60d01.r1 Homo sapiens cDNA         | 7593.5513 |
| 12308 | RC_AA027050_at_GI_32306541-S   | EST: zk02g01.s1 Soares pregnant uterus    | 7597.9326 |
| 12309 | RC_AA491465_at_NA_illumina     | EST: ab04a05.s1 Stratagene fetal retina   | 7605.327  |
| 12310 | M20203_s_at_GI_4503548-S       | Neutrophil elastase gene, exon 5          | 7607.287  |
| 12311 | D49958_at_GI_42476106-A        | Fetus brain mRNA for membrane             | 7610.2295 |
| 12312 | AF006084_at_GI_22907055-S      | Arp2/3 protein complex subunit p41-Arc    | 7611.1133 |
| 12313 | L38932_at_GI_19923741-S        | GT197 partial ORF mRNA, 3' end of cds     | 7612.48   |
| 12314 | H10482_at_NA_illumina          | EST: yl90d12.r1 Homo sapiens cDNA         | 7612.825  |
| 12315 | RC_AA608649_at_GI_9257239-A    | Homo sapiens clone 23742 mRNA, partial    | 7612.907  |
| 12316 | R60478_at_NA_illumina          | EST: yh13h04.r1 Homo sapiens cDNA         | 7613.4307 |
| 12317 | M16342_at_GI_14110430-A        | HnRNP C2 protein mRNA                     | 7620.5757 |
| 12318 | R51423_at_GI_42741664-S        | EST: yg72e03.r1 Homo sapiens cDNA         | 7624.9673 |
| 12319 | RC_AA009725_at_GI_20070275-S   | EST: ze82c05.s1 Soares fetal heart        | 7629.9995 |
| 12320 | RC_AA292931_at_GI_28951070-S   | EST: zt54e06.s1 Soares ovary tumor        | 7630.2026 |
| 12321 | RC_AA454675_at_GI_23397470-S   | EST: zx76a07.s1 Soares ovary tumor        | 7639.3203 |
| 12322 | X55666_at_GI_24475897-S        | Usf mRNA for late upstream transcription  | 7640.5796 |
| 12323 | X55666_at-2_NA_illumina        | Human usf mRNA for late upstream          | 7640.5796 |
| 12324 | AA424307_at_GI_40254981-S      | EST: zv90c09.r1 Soares NhHMPu S1          | 7641.2104 |
| 12325 | U89336_cds1_at_GI_11545816-S   | Unknown gene extracted from Human HLA     | 7646.6665 |
| 12326 | AA235448_s_at_NA_illumina      | EST: zr70f10.r1 Soares NhHMPu S1          | 7651.084  |
| 12327 | RC_AA504270_at_NA_illumina     | EST: aa61c10.s1 NCI_CGAP_GCB1             | 7651.919  |
| 12328 | RC_AA459690_s_at_GI_7706368-S  | EST: zx49e04.s1 Soares testis NHT Homo    | 7653.1177 |
| 12329 | RC_AA057620_at_GI_34222144-S   | EST: zf15h06.s1 Soares fetal heart        | 7653.6553 |

|       |                               |                                             |           |
|-------|-------------------------------|---------------------------------------------|-----------|
| 12330 | C06271_at_GI_7705372-S        | EST: similar to none, mRNA sequence.        | 7657.474  |
| 12331 | AA001296_s_at_NA_illumina     | EST: zh82b09.r1 Soares fetal liver spleen   | 7660.1587 |
| 12332 | AJ000099_s_at_GI_15022800-A   | Lysosomal hyaluronidase                     | 7660.993  |
| 12333 | X62891_s_at_GI_13259532-S     | Mutant coseg gene for vasopressin-          | 7664.9614 |
| 12334 | RC_AA620470_at_NA_illumina    | EST: ae58e11.s1 Stratagene lung             | 7666.888  |
| 12335 | RC_AA159501_at_GI_14043031-A  | EST: zo72c02.s1 Stratagene pancreas         | 7670.743  |
| 12336 | W58057_s_at_GI_45439326-S     | Periplakin                                  | 7671.503  |
| 12337 | RC_AA609786_s_at_GI_5453791-S | PROLIFERATING-CELL NUCLEOLAR                | 7677.087  |
| 12338 | RC_AA452538_at_NA_illumina    | EST: zx35e05.s1 Soares total fetus          | 7677.7886 |
| 12339 | RC_D20350_at_NA_illumina      | EST: Human HL60 3'directed MboI cDNA,       | 7680.164  |
| 12340 | RC_AA148983_at_GI_37552665-S  | EST: zn99f10.s1 Stratagene colon            | 7682.7544 |
| 12341 | RC_AA477263_at_NA_illumina    | EST: zu39a12.s1 Soares ovary tumor          | 7686.0576 |
| 12342 | RC_AA453619_at_NA_illumina    | EST: zx48b04.s1 Soares testis NHT Homo      | 7686.7446 |
| 12343 | S72493_s_at_NA_illumina       | KERATIN, TYPE I CYTOSKELETAL 17             | 7687.812  |
| 12344 | U02570_at_GI_19923243-S       | CDC42 GTPase-activating protein mRNA,       | 7690.6626 |
| 12345 | W19983_at_NA_illumina         | SFRS protein kinase 1                       | 7692.206  |
| 12346 | D14695_at_GI_7661869-S        | APOA2 Apolipoprotein A-II                   | 7692.3135 |
| 12347 | M36341_at_GI_6995998-S        | ARF4 ADP-ribosylation factor 4              | 7695.8193 |
| 12348 | L11370_at_NA_illumina         | Protocadherin 42 mRNA for abbreviated       | 7702.9287 |
| 12349 | RC_AA421100_at_GI_31377740-S  | EST: zu27d11.s1 Soares ovary tumor          | 7705.8276 |
| 12350 | RC_AA236982_at_NA_illumina    | Thymine-DNA glycosylase                     | 7710.1104 |
| 12351 | RC_AA157340_at_GI_8923395-S   | EST: zo42h04.s1 Stratagene endothelial      | 7710.321  |
| 12352 | U00968_at_GI_22547194-S       | SREBP-1 mRNA                                | 7711.515  |
| 12353 | RC_AA459961_at_NA_illumina    | EST: zx66c03.s1 Soares total fetus          | 7713.803  |
| 12354 | RC_AA620295_s_at_NA_illumina  | EST: af04h10.s1 Soares testis NHT Homo      | 7718.3228 |
| 12355 | L41067_at-2_NA_illumina       | Nuclear factor of activated T-cells,        | 7726.8647 |
| 12356 | L41067_at_GI_27886558-A       | Transcription factor NFATx mRNA             | 7726.8647 |
| 12357 | U72517_at_NA_illumina         | Alternatively spliced variant C7f (C3f)     | 7727.8223 |
| 12358 | RC_AA411882_at_NA_illumina    | EST: zu01g11.s1 Soares testis NHT Homo      | 7727.9766 |
| 12359 | RC_AA424789_at_NA_illumina    | EST: zw04a08.s1 Soares NhHMPu S1            | 7728.701  |
| 12360 | Z49835_s_at_NA_illumina       | PROBABLE PROTEIN DISULFIDE                  | 7730.81   |
| 12361 | RC_AA490899_at_NA_illumina    | EST: aa52b01.s1 NCI_CGAP_GCB1               | 7731.3745 |
| 12362 | C02099_s_at_NA_illumina       | EST: HUMGS0006419, Human Gene               | 7736.195  |
| 12363 | AA076145_at_GI_21361603-S     | EST: zm90a07.r1 Stratagene ovarian          | 7738.9697 |
| 12364 | RC_AA253466_at_NA_illumina    | EST: zr77g04.s1 Soares NhHMPu S1            | 7745.3335 |
| 12365 | X97074_at_GI_11038642-A       | EEF2 Eukaryotic translation elongation      | 7745.9404 |
| 12366 | D49489_at_NA_illumina         | Protein disulfide isomerase-related protein | 7749.2437 |
| 12367 | RC_AA489080_at_NA_illumina    | EST: aa54h08.s1 NCI_CGAP_GCB1               | 7750.6074 |
| 12368 | R82411_at_NA_illumina         | DEK gene                                    | 7751.69   |
| 12369 | R80083_at_NA_illumina         | EST: yi95b06.r1 Homo sapiens cDNA           | 7760.958  |
| 12370 | U77604_at_GI_22035639-S       | Microsomal glutathione S-transferase        | 7764.927  |
| 12371 | AA214688_at_GI_18491027-S     | EST: PMY0173 KG1-a Lambda Zap               | 7766.4736 |
| 12372 | RC_AA482112_at_NA_illumina    | EST: zv43b10.s1 Soares ovary tumor          | 7766.7344 |



|       |                                |                                              |           |
|-------|--------------------------------|----------------------------------------------|-----------|
| 12373 | RC_AA262499_at_GI_7662281-S    | KIAA0748 gene product                        | 7767.2236 |
| 12374 | RC_AA293206_at_NA_illumina     | EST: zt48g04.s1 Soares ovary tumor           | 7767.7686 |
| 12375 | RC_AA451676_at_GI_34222220-S   | EST: zx44b03.s1 Soares total fetus           | 7769.275  |
| 12376 | Z83838_at_NA_illumina          | Human DNA sequence from PAC 127B20           | 7773.975  |
| 12377 | HG2994-HT4850_s_at_NA_illumina | Elastin, Alt. Splice 2                       | 7774.0493 |
| 12378 | Z49825_s_at_NA_illumina        | HEPATOCYTE NUCLEAR FACTOR 4                  | 7775.483  |
| 12379 | AA248199_s_at_GI_13929470-S    | EST: csg1153.seq.F Human fetal heart,        | 7776.9053 |
| 12380 | RC_AA405379_at_NA_illumina     | EST: zu66b01.s1 Soares testis NHT Homo       | 7780.656  |
| 12381 | N27670_at_GI_5453915-S         | Homo sapiens mRNA for putative               | 7781.2812 |
| 12382 | Z26491_s_at_NA_illumina        | COMT Catechol-O-methyltransferase            | 7782.783  |
| 12383 | RC_AA459897_at_NA_illumina     | Homo sapiens mRNA encoding rat C4.4-         | 7784.156  |
| 12384 | AA311931_s_at_NA_illumina      | Ras-related C3 botulinum toxin substrate 3   | 7786.3853 |
| 12385 | W26239_at_NA_illumina          | Homo sapiens clone 23931 mRNA, partial       | 7787.8887 |
| 12386 | RC_AA436893_at_NA_illumina     | EST: zv59h11.s1 Soares testis NHT Homo       | 7789.036  |
| 12387 | RC_AA598679_at_NA_illumina     | EST: ae40b06.s1 Gessler Wilms tumor          | 7792.685  |
| 12388 | C01169_at_GI_31543390-S        | Karyopherin alpha 4 (importin alpha 3)       | 7793.0786 |
| 12389 | RC_AA599032_at_GI_42734376-S   | EST: ae41h03.s1 Gessler Wilms tumor          | 7793.3896 |
| 12390 | U82613_at-2_NA_illumina        | Human DNA-binding protein ABP/ZF             | 7794.57   |
| 12391 | U82613_at_GI_21314681-S        | DNA-binding protein ABP/ZF mRNA              | 7794.57   |
| 12392 | RC_AA399538_at_NA_illumina     | EST: zt88e11.s1 Soares testis NHT Homo       | 7795.87   |
| 12393 | X04602_s_at-2_NA_illumina      | Interleukin 6 (interferon, beta 2)           | 7800.0654 |
| 12394 | X04602_s_at_GI_10834983-S      | IL6 Interleukin 6 (B cell stimulatory factor | 7800.0654 |
| 12395 | RC_AA195626_at_NA_illumina     | EST: zr38h09.s1 Soares NhHMPu S1             | 7802.988  |
| 12396 | RC_AA436861_at_NA_illumina     | EST: zv59e10.s1 Soares testis NHT Homo       | 7803.955  |
| 12397 | RC_AA243326_at_NA_illumina     | Thyroid hormone receptor-associated          | 7804.6235 |
| 12398 | RC_AA425420_at_NA_illumina     | EST: zw48e11.s1 Soares total fetus           | 7808.859  |
| 12399 | D42073_at_GI_4506454-S         | Reticulocalbin                               | 7811.139  |
| 12400 | RC_AA406610_at_NA_illumina     | EST: zv15b10.s1 Soares NhHMPu S1             | 7813.797  |
| 12401 | H14744_at_GI_29789113-S        | EST: ym24e06.r1 Homo sapiens cDNA            | 7817.5264 |
| 12402 | RC_AA404512_at_NA_illumina     | EST: zw38d02.s1 Soares total fetus           | 7822.9976 |
| 12403 | RC_AA290630_at_NA_illumina     | EST: zs45f10.s1 NCI_CGAP_GCB1 Homo           | 7823.56   |
| 12404 | X73478_at_GI_30065648-A        | HPTPA mRNA                                   | 7827.6787 |
| 12405 | RC_AA491001_i_at_NA_illumina   | EST: aa52g12.s1 NCI_CGAP_GCB1                | 7832.677  |
| 12406 | RC_AA429349_at_NA_illumina     | H.sapiens HUNK1 mRNA                         | 7840.9043 |
| 12407 | T63174_s_at_NA_illumina        | KIAA0331 gene product                        | 7842.069  |
| 12408 | RC_AA400979_at_GI_5032022-S    | Homo sapiens mRNA encoding RAMP3             | 7842.4863 |
| 12409 | X14767_at-2_NA_illumina        | Gamma-aminobutyric acid (GABA) A             | 7842.7534 |
| 12410 | X14767_at_NA_illumina          | GABRB1 Gamma-aminobutyric acid               | 7842.7534 |
| 12411 | RC_AA429572_at_NA_illumina     | GUANINE NUCLEOTIDE-BINDING                   | 7853.0234 |
| 12412 | AA455606_s_at_NA_illumina      | EST: aa17e06.r1 Soares NhHMPu S1             | 7857.6553 |
| 12413 | S72008_at_NA_illumina          | CDC10 Cell division cycle 10 (homologous     | 7861.672  |
| 12414 | M95678_at_GI_4758937-S         | PLCB2 Phospholipase C, beta 2                | 7861.805  |
| 12415 | RC_AA620553_s_at_GI_19718776-  | Flap structure-specific endonuclease 1       | 7863.248  |

|       |                              |                                            |           |
|-------|------------------------------|--------------------------------------------|-----------|
| 12416 | RC_AA465243_at_NA_illumina   | Proteasome (prosome, macropain) 26S        | 7864.0107 |
| 12417 | AA018541_at_GI_7657692-S     | Homo sapiens zinc finger protein (ZF5128)  | 7865.5195 |
| 12418 | H61002_at_GI_20555643-S      | EST: yr50b10.r1 Homo sapiens cDNA          | 7866.5845 |
| 12419 | RC_AA128177_at_GI_21314683-A | EST: zl15g05.s1 Soares pregnant uterus     | 7867.069  |
| 12420 | X59798_at_GI_16950654-S      | CCND1 Cyclin D1 (PRAD1; parathyroid        | 7871.497  |
| 12421 | AA095045_s_at_NA_illumina    | EST: cp2563.seq.F Fetal heart, Lambda      | 7871.9854 |
| 12422 | RC_AA135871_at_GI_20070108-I | EST: zn93h05.s1 Stratagene lung            | 7882.8726 |
| 12423 | L10615_s_at_GI_4503086-S     | CSN2 Beta-casein                           | 7885.402  |
| 12424 | AB002388_at_NA_illumina      | KIAA0390 gene product                      | 7885.6377 |
| 12425 | L13740_at_NA_illumina        | HMR Hormone receptor (growth factor-       | 7885.84   |
| 12426 | M10050_at_GI_4557576-S       | HBG2 Hemoglobin gamma-G                    | 7887.7773 |
| 12427 | AA298786_at_GI_37694066-A    | EST: EST114389 Activated T-cells I Homo    | 7887.7925 |
| 12428 | AA491188_at_GI_17505233-A    | EST: aa52g02.r1 NCI_CGAP_GCB1              | 7894.2295 |
| 12429 | D31885_at_GI_24308006-S      | KIAA0069 gene, partial cds                 | 7898.8457 |
| 12430 | AA112941_at_GI_38327624-A    | Citrate synthase                           | 7898.8735 |
| 12431 | D14043_at_GI_34222157-S      | PUTATIVE MUCIN CORE PROTEIN                | 7904.003  |
| 12432 | RC_AA450118_at_GI_34330189-S | EST: zx42e09.s1 Soares total fetus         | 7904.1455 |
| 12433 | U30999_at_NA_illumina        | U30999 Homo sapiens MV3 melanoma           | 7904.83   |
| 12434 | RC_AA451672_s_at_NA_illumina | EST: zx44a10.s1 Soares total fetus         | 7905.3857 |
| 12435 | U10485_at_GI_42789728-S      | Lymphoid-restricted membrane protein       | 7905.4946 |
| 12436 | W58520_at_NA_illumina        | Nucleoporin 88kD                           | 7907.926  |
| 12437 | X65727_cds2_s_at_NA_illumina | GSTalpha locus gene (glutathione S-        | 7908.103  |
| 12438 | U81556_at_GI_19923329-S      | Hypothetical protein A4 mRNA               | 7908.826  |
| 12439 | RC_AA019599_at_GI_21626460-S | EST: ze60f12.s1 Soares retina N2b4HR       | 7910.993  |
| 12440 | RC_AA291659_at_GI_40353202-S | EST: zt37c02.s1 Soares ovary tumor         | 7913.7764 |
| 12441 | RC_AA455367_at_GI_23308602-S | EST: aa03h07.s1 Soares NhHMPu S1           | 7913.936  |
| 12442 | RC_AA418733_f_at_NA_illumina | Glioblastoma amplified sequence            | 7917.427  |
| 12443 | RC_AA456325_at_NA_illumina   | Low density lipoprotein receptor (familial | 7917.5244 |
| 12444 | RC_AA452161_at_NA_illumina   | EST: zx29c11.s1 Soares total fetus         | 7919.2495 |
| 12445 | RC_AA600134_at_GI_7657133-S  | Homo sapiens cDNA for dihydroxyacetone     | 7921.1885 |
| 12446 | D28416_at_GI_33413399-S      | Esterase D, 5'UTR (sequence from the       | 7921.6987 |
| 12447 | AF006012_at_GI_4758215-S     | Homo sapiens dishevelled 2 (DVL2)          | 7923.027  |
| 12448 | D87465_at_GI_7662035-S       | KIAA0275 gene                              | 7925.164  |
| 12449 | RC_AA286809_at_GI_31543907-S | EST: zs54a04.s1 NCI_CGAP_GCB1              | 7925.565  |
| 12450 | RC_AA457730_at_NA_illumina   | Homo sapiens clone 23851 mRNA              | 7925.8213 |
| 12451 | H91564_at_GI_22027479-S      | EST: yw29b04.r1 Homo sapiens cDNA          | 7930.311  |
| 12452 | AA452004_at_NA_illumina      | EST: zv75e06.r1 Soares total fetus         | 7933.78   |
| 12453 | RC_AA262276_at_NA_illumina   | EST: zs25f07.s1 NCI_CGAP_GCB1 Homo         | 7937.6187 |
| 12454 | AB002302_at_GI_7662045-S     | KIAA0304 gene product                      | 7939.114  |
| 12455 | S56151_s_at_GI_5174556-S     | HMFG                                       | 7943.917  |
| 12456 | AA378597_at_GI_24475708-S    | EST: EST91316 Synovial sarcoma Homo        | 7945.804  |
| 12457 | D50063_at-2_NA_illumina      | Proteasome (prosome, macropain) 26S        | 7950.3477 |
| 12458 | D50063_at_GI_34335279-S      | Proteasome subunit p40_ / Mov34 protein    | 7950.3477 |

|       |                               |                                          |           |
|-------|-------------------------------|------------------------------------------|-----------|
| 12459 | W80516_at_NA_illumina         | EST: zd82a06.r1 Soares fetal heart       | 7951.961  |
| 12460 | Z27113_at_GI_14602451-S       | DNA-DIRECTED RNA POLYMERASE II           | 7954.61   |
| 12461 | M14676_at_GI_23510363-A       | FYN FYN oncogene related to SRC, FGR,    | 7961.9297 |
| 12462 | RC_AA037828_at_NA_illumina    | Homo sapiens mRNA for KIAA0614           | 7962.4707 |
| 12463 | RC_AA402492_at_NA_illumina    | EST: zt65d03.s1 Soares testis NHT Homo   | 7963.016  |
| 12464 | RC_AA455909_at_NA_illumina    | Serine/threonine kinase 17a (apoptosis-  | 7965.8447 |
| 12465 | AA481670_at_GI_7705904-S      | EST: zv06g11.r1 Soares NhHMPu S1         | 7969.352  |
| 12466 | L32977_at_GI_5174742-S        | UBIQUINOL-CYTOCHROME C                   | 7970.266  |
| 12467 | RC_AA520989_at_NA_illumina    | EST: aa70b12.s1 NCI_CGAP_GCB1            | 7980.9004 |
| 12468 | AA171913_at_GI_9951924-S      | Carbonic anhydrase XII                   | 7982.0254 |
| 12469 | RC_AA486444_at_NA_illumina    | EST: ab36f11.s1 Stratagene HeLa cell s3  | 7987.885  |
| 12470 | J05243_at_GI_4507190-S        | SPTAN1 Spectrin, alpha, non-erythrocytic | 7989.002  |
| 12471 | RC_AA430050_at_GI_41056186-S  | Homo sapiens mRNA for KIAA0729           | 7994.98   |
| 12472 | H46486_s_at_GI_42476122-S     | Dihydropyrimidinase-like 2               | 7998.515  |
| 12473 | W28362_at_GI_33667083-S       | EST: 46g10 Human retina cDNA randomly    | 8002.996  |
| 12474 | RC_AA258152_at_GI_42658301-S  | EST: zs35a06.s1 NCI_CGAP_GCB1            | 8004.577  |
| 12475 | C16379_at_NA_illumina         | Actin-related protein 2                  | 8007.4683 |
| 12476 | Z48042_at_GI_42734502-I       | mRNA encoding GPI-anchored protein       | 8009.9185 |
| 12477 | RC_AA235765_s_at_GI_41350328- | KIAA0214 gene product                    | 8012.466  |
| 12478 | RC_AA444004_s_at_GI_17738307- | EST: zv44e12.s1 Soares ovary tumor       | 8015.051  |
| 12479 | D00761_at_GI_22538462-S       | PSMA5 Proteasome component C5            | 8019.343  |
| 12480 | RC_AA237017_at_NA_illumina    | EST: zs01c10.s1 NCI_CGAP_GCB1            | 8025.645  |
| 12481 | X59932_s_at_GI_4758077-S      | CSK C-src tyrosine kinase                | 8029.2383 |
| 12482 | RC_AA452873_at_GI_16554567-A  | EST: zx36e07.s1 Soares total fetus       | 8029.2456 |
| 12483 | RC_AA443334_at_NA_illumina    | EST: zw94g05.s1 Soares total fetus       | 8034.4834 |
| 12484 | RC_AA450114_at_GI_31543084-S  | EST: zx42e04.s1 Soares total fetus       | 8045.6426 |
| 12485 | M87503_at_GI_25282406-S       | TRANSCRIPTIONAL REGULATOR ISGF3          | 8046.178  |
| 12486 | AA091412_s_at_GI_19923826-S   | Homo sapiens mRNA containing (CAG)4      | 8046.8774 |
| 12487 | RC_AA496053_at_NA_illumina    | EST: zv72f05.s1 Soares total fetus       | 8047.2695 |
| 12488 | RC_AA496037_at_NA_illumina    | EST: zv72d08.s1 Soares total fetus       | 8048.607  |
| 12489 | D78014_at_GI_45505175-S       | Dihydropyrimidinase related protein-3    | 8049.1333 |
| 12490 | U38980_at_NA_illumina         | PMS8 mRNA (yeast mismatch repair gene    | 8052.3047 |
| 12491 | RC_AA076672_at_NA_illumina    | EST: zm20g08.s1 Stratagene pancreas      | 8056.4424 |
| 12492 | Z14077_s_at_NA_illumina       | YY1 transcription factor                 | 8057.022  |
| 12493 | RC_AA476448_at_GI_19923722-S  | EST: zx02f06.s1 Soares total fetus       | 8057.6504 |
| 12494 | U51127_at_GI_38683858-A       | IRF5 Interferon regulatory factor 5      | 8074.4766 |
| 12495 | RC_AA599945_at_GI_13236552-S  | EST: ag24h03.s1 Jia bone marrow stroma   | 8087.0522 |
| 12496 | RC_AA452536_at_NA_illumina    | V-ral simian leukemia viral oncogene     | 8101.469  |
| 12497 | RC_AA480047_at_GI_8923416-S   | EST: zv41b03.s1 Soares ovary tumor       | 8102.1763 |
| 12498 | RC_AA620795_at_NA_illumina    | EST: af95b02.s1 Soares testis NHT Homo   | 8113.418  |
| 12499 | RC_AA261907_at_NA_illumina    | EST: zs17d04.s1 NCI_CGAP_GCB1            | 8113.7056 |
| 12500 | RC_AA599680_at_NA_illumina    | Homo sapiens antigen NY-CO-33 (NY-CO-    | 8117.0405 |
| 12501 | RC_AA621447_at_GI_41148005-S  | Af36h03.s1                               | 8121.1143 |

|       |                                |                                           |           |
|-------|--------------------------------|-------------------------------------------|-----------|
| 12502 | D78676_at_NA_illumina          | EST: Human placenta cDNA 5'-end GEN-      | 8121.7056 |
| 12503 | U12597_s_at_GI_22027613-A      | TNF receptor-associated factor 2          | 8124.847  |
| 12504 | RC_AA435867_at_NA_illumina     | EST: zt80f08.s1 Soares testis NHT Homo    | 8129.113  |
| 12505 | H67964_at_NA_illumina          | Yu53g07.r1 Soares fetal liver spleen      | 8129.758  |
| 12506 | L35594_at_GI_20070229-S        | Autotaxin mRNA                            | 8130.0537 |
| 12507 | RC_AA451865_at_NA_illumina     | H. sapiens RNA for CLCN3                  | 8133.179  |
| 12508 | RC_AA435838_s_at_NA_illumina   | EST: zt80b06.s1 Soares testis NHT Homo    | 8139.4536 |
| 12509 | X05409_at_GI_25777731-S        | ALDH2 Aldehyde dehydrogenase 2,           | 8140.2437 |
| 12510 | M33336_at_GI_33636720-S        | PRKAR1A CAMP-dependent protein            | 8140.391  |
| 12511 | D14662_at_GI_28559000-S        | KIAA0106 gene                             | 8142.251  |
| 12512 | RC_AA443090_s_at_NA_illumina   | Interferon regulatory factor 7            | 8148.473  |
| 12513 | U72206_at_GI_15011973-S        | Guanine nucleotide regulatory factor      | 8149.143  |
| 12514 | T61033_at_NA_illumina          | EST: yb74f09.r1 Homo sapiens cDNA         | 8149.192  |
| 12515 | J03459_at_GI_4505028-S         | LTA4H Leukotriene A4 hydrolase            | 8150.24   |
| 12516 | RC_AA609614_at_NA_illumina     | EST: af15f12.s1 Soares testis NHT Homo    | 8152.623  |
| 12517 | RC_AA405663_at_NA_illumina     | EST: zu19b03.s1 Soares NhHMPu S1          | 8154.4634 |
| 12518 | X83425_at_NA_illumina          | LU gene for Lutheran blood group          | 8157.483  |
| 12519 | X96924_rna1_at_NA_illumina     | Gene encoding mitochondrial citrate       | 8158.0957 |
| 12520 | M12272_s_at_NA_illumina        | Alcohol dehydrogenase 3 (class I), gamma  | 8164.5273 |
| 12521 | RC_AA280375_at_NA_illumina     | EST: zt05b07.s1 NCI_CGAP_GCB1 Homo        | 8165.112  |
| 12522 | D57428_s_at_GI_33695094-S      | EST: Human aorta cDNA 5'-end GEN-         | 8165.324  |
| 12523 | RC_AA398141_at_GI_40217789-S   | EST: zt58g11.s1 Soares testis NHT Homo    | 8168.107  |
| 12524 | L02426_at_GI_24430150-S        | 26S PROTEASE REGULATORY                   | 8168.8867 |
| 12525 | C01552_at_NA_illumina          | EST: HUMGS0008548, Human Gene             | 8169.819  |
| 12526 | RC_AA609213_at_GI_34222322-S   | EST: af12f09.s1 Soares testis NHT Homo    | 8169.9883 |
| 12527 | AA320369_s_at_NA_illumina      | GLUT1 C-terminal binding protein          | 8171.5386 |
| 12528 | W86706_at_NA_illumina          | EST: zh63d02.r1 Soares fetal liver spleen | 8173.4106 |
| 12529 | RC_AA291268_at_NA_illumina     | EST: zs18d01.s1 NCI_CGAP_GCB1             | 8174.349  |
| 12530 | L13852_at_GI_38045947-S        | UBE1L Ubiquitin-activating enzyme E1,     | 8175.518  |
| 12531 | RC_AA410336_at_GI_31542728-S   | EST: zv16d12.s1 Soares NhHMPu S1          | 8179.7427 |
| 12532 | HG4069-HT4339_s_at_NA_illumina | Monocyte Chemotactic Protein 1            | 8180.463  |
| 12533 | RC_AA281951_at_NA_illumina     | EST: zs89e04.s1 NCI_CGAP_GCB1             | 8181.3364 |
| 12534 | X66401_cds1_at_GI_23110931-A   | LMP2 gene extracted from H.sapiens        | 8182.0366 |
| 12535 | AA224502_at_GI_19923828-S      | Homo sapiens clone 643 unknown mRNA,      | 8182.7783 |
| 12536 | AA248734_at_NA_illumina        | EST: hfe0796.seq.F Human fetal heart,     | 8188.6064 |
| 12537 | X69699_at_GI_37577111-A        | Pax8 mRNA                                 | 8190.269  |
| 12538 | L08666_at_GI_42476280-S        | VDAC2 Voltage-dependent anion channel     | 8196.861  |
| 12539 | RC_AA029042_at_NA_illumina     | Seven in absentia (Drosophila) homolog 2  | 8199.731  |
| 12540 | U29953_rna1_at_GI_39725933-S   | Pigment epithelium-derived factor gene    | 8202.368  |
| 12541 | D83735_at_GI_41327728-S        | Adult heart mRNA for neutral calponin     | 8210.73   |
| 12542 | J03890_rna1_at_GI_42476334-S   | SP-C1 gene (pulmonary surfactant protein  | 8217.248  |
| 12543 | W26204_at_GI_21359876-S        | EST: 22c2 Human retina cDNA randomly      | 8220.143  |
| 12544 | D89052_at_GI_19913434-S        | Proton-ATPase-like protein                | 8226.865  |

|       |                               |                                              |           |
|-------|-------------------------------|----------------------------------------------|-----------|
| 12545 | Z25521_s_at_NA_illumina       | Integrin associated protein mRNA,            | 8227.178  |
| 12546 | RC_AA426089_at_GI_34222158-S  | EST: zv52d02.s1 Soares testis NHT Homo       | 8229.992  |
| 12547 | U10439_at_GI_7669474-A        | ADAR Double-stranded RNA adenosine           | 8230.794  |
| 12548 | RC_AA136471_at_NA_illumina    | EST: zl01e08.s1 Soares pregnant uterus       | 8243.121  |
| 12549 | RC_AA133896_s_at_GI_37059749- | Homo sapiens clone 24812 mRNA                | 8243.209  |
| 12550 | RC_AA430104_at_NA_illumina    | Heterogeneous nuclear ribonucleoprotein      | 8248.721  |
| 12551 | M69203_s_at_NA_illumina       | SCYA4 Small inducible cytokine A4            | 8248.901  |
| 12552 | AA044784_at_NA_illumina       | EST: zk74b12.r1 Soares pregnant uterus       | 8253.342  |
| 12553 | RC_AA448219_at_NA_illumina    | KIAA0705 gene product                        | 8255.519  |
| 12554 | X91257_at_GI_16306547-S       | SERYL-TRNA SYNTHETASE                        | 8256.242  |
| 12555 | J05070_at_GI_4826835-S        | MMP2 Matrix metalloproteinase 2              | 8260.594  |
| 12556 | M24398_at_GI_42476154-S       | PTMS Parathymosin                            | 8261.1455 |
| 12557 | Y10141_s_at_NA_illumina       | DAT1 gene, partial, VNTR                     | 8262.148  |
| 12558 | RC_AA161480_at_NA_illumina    | EST: zq42b10.s1 Stratagene hNT neuron        | 8263.744  |
| 12559 | RC_AA448177_at_GI_34147373-S  | EST: zw83b12.s1 Soares testis NHT            | 8264.103  |
| 12560 | RC_AA456677_at_GI_33636753-S  | EST: aa01h03.s1 Soares NhHMPu S1             | 8268.696  |
| 12561 | RC_AA191014_at_NA_illumina    | EST: zp85g03.s1 Stratagene HeLa cell s3      | 8270.596  |
| 12562 | RC_AA279439_at_NA_illumina    | EST: zs85f09.s1 NCI_CGAP_GCB1 Homo           | 8272.358  |
| 12563 | D49400_at_GI_20357546-S       | Fetus brain mRNA for vacuolar ATPase         | 8274.264  |
| 12564 | W26769_at_NA_illumina         | EST: 12g3 Human retina cDNA randomly         | 8280.314  |
| 12565 | RC_AA234061_at_GI_30089946-S  | EST: zr74b02.s1 Soares NhHMPu S1             | 8286.885  |
| 12566 | AA046593_at_NA_illumina       | EST: zk62g01.r1 Soares pregnant uterus       | 8287.051  |
| 12567 | W69582_at_NA_illumina         | Homo sapiens mRNA for KIAA0696               | 8287.313  |
| 12568 | X16663_at_GI_37059786-S       | HEMATOPOIETIC LINEAGE CELL                   | 8288.476  |
| 12569 | RC_AA421104_at_GI_21735601-A  | EST: zt86c10.s1 Soares testis NHT Homo       | 8292.506  |
| 12570 | R84329_at_NA_illumina         | EST: yq23c06.r1 Soares retina N2b4HR         | 8293.262  |
| 12571 | C02050_at_NA_illumina         | Homo sapiens mRNA for beta-tubulin           | 8296.871  |
| 12572 | U79294_at_GI_29171741-A       | Clone 23748 mRNA                             | 8298.378  |
| 12573 | RC_D60296_at_NA_illumina      | EST: Human fetal brain cDNA 3'-end GEN-      | 8299.553  |
| 12574 | M65292_s_at_NA_illumina       | HFL1 H factor (complement)-like 1            | 8302.969  |
| 12575 | RC_AA496961_at_GI_24475836-S  | EST: aa42f08.s1 Soares NhHMPu S1             | 8303.974  |
| 12576 | RC_AA504146_at_NA_illumina    | EST: aa59e06.s1 NCI_CGAP_GCB1                | 8309.984  |
| 12577 | D86479_at_GI_4755145-S        | Non-lens beta gamma-crystallin like          | 8313.47   |
| 12578 | S78873_s_at-2_NA_illumina     | RAB interacting factor                       | 8313.501  |
| 12579 | S78873_s_at_GI_31543539-S     | Guanine nucleotide exchange factor mss4      | 8313.501  |
| 12580 | RC_AA404338_at_NA_illumina    | EST: zv63a12.s1 Soares total fetus           | 8318.252  |
| 12581 | X52541_at_GI_31317226-S       | EGR1 Early growth response protein 1         | 8318.637  |
| 12582 | M86752_at_GI_5803180-S        | TRANSFORMATION-SENSITIVE                     | 8320.963  |
| 12583 | RC_AA464240_s_at_NA_illumina  | EST: zx81a05.s1 Soares ovary tumor           | 8322.457  |
| 12584 | R36221_at_NA_illumina         | EST: yh91b09.r1 Homo sapiens cDNA            | 8323.407  |
| 12585 | D58231_s_at_GI_40254846-S     | EST: Human aorta cDNA 5'-end GEN-            | 8329.945  |
| 12586 | AA284380_s_at_NA_illumina     | Neutrophil cytosolic factor 1 (47kD, chronic | 8330.772  |
| 12587 | RC_AA459402_s_at_GI_14211539- | EST: zx89g02.s1 Soares ovary tumor           | 8332.655  |

|       |                                |                                          |          |
|-------|--------------------------------|------------------------------------------|----------|
| 12588 | RC_AA232208_at_NA_illumina     | EST: zr45e02.s1 Soares NhHMPu S1         | 8334.3   |
| 12589 | D78012_at_GI_21359849-S        | CRMP1 Collapsin response mediator        | 8335.011 |
| 12590 | M96577_s_at_NA_illumina        | E2F transcription factor 1               | 8336.767 |
| 12591 | M29877_at_GI_24475878-S        | FUCA1 Fucosidase, alpha-L- 1, tissue     | 8341.888 |
| 12592 | L43631_at_GI_21264342-S        | Scaffold attachment factor (SAF-B) gene, | 8343.993 |
| 12593 | L43631_at-2_NA_illumina        | Scaffold attachment factor B             | 8343.993 |
| 12594 | U66464_at_GI_45331203-S        | Hematopoietic progenitor kinase (HPK1)   | 8345.923 |
| 12595 | U66464_at-2_NA_illumina        | Human hematopoietic progenitor kinase    | 8345.923 |
| 12596 | RC_AA136474_at_GI_27502380-A   | Meis (mouse) homolog 2                   | 8349.358 |
| 12597 | D86967_at_GI_7662001-S         | KIAA0212 gene                            | 8354.699 |
| 12598 | RC_AA609348_at_GI_24308256-S   | EST: zu71c02.s1 Soares testis NHT Homo   | 8355.023 |
| 12599 | RC_AA291657_at_GI_32307129-A   | EST: zt37b12.s1 Soares ovary tumor       | 8357.192 |
| 12600 | AA290897_at_NA_illumina        | Hemoglobin, gamma A                      | 8358.695 |
| 12601 | RC_AA464423_at_NA_illumina     | EST: zx78g08.s1 Soares ovary tumor       | 8361.896 |
| 12602 | RC_AA609045_at_GI_31542710-S   | EST: af10e04.s1 Soares testis NHT Homo   | 8363.216 |
| 12603 | L06132_at_GI_4507878-S         | VDAC1 Voltage-dependent anion channel    | 8364.411 |
| 12604 | D81308_s_at_GI_13569869-S      | Homo sapiens mRNA expressed in           | 8368.122 |
| 12605 | M61827_rna1_s_at_GI_40254469-S | Leukosialin (CD43) gene                  | 8370.022 |
| 12606 | AA292609_at_NA_illumina        | EST: zs57g01.r1 NCI_CGAP_GCB1 Homo       | 8370.455 |
| 12607 | RC_AA004707_at_GI_4826664-S    | Copper chaperone for superoxide          | 8370.677 |
| 12608 | D28137_at_GI_7262372-S         | RPS11 Ribosomal protein S11              | 8375.066 |
| 12609 | RC_AA156359_at_GI_42741653-S   | Human TAR DNA-binding protein-43         | 8376.747 |
| 12610 | D28423_at_GI_31377552-S        | Pre-mRNA splicing factor SRp20, 5'UTR    | 8381.145 |
| 12611 | RC_AA449455_at_NA_illumina     | EST: zx05e10.s1 Soares total fetus       | 8382.342 |
| 12612 | AA093131_at_GI_15011919-S      | Homo sapiens PAC clone DJ0167F23         | 8389.952 |
| 12613 | RC_AA482126_at_NA_illumina     | Claudin 3                                | 8415.182 |
| 12614 | S82470_at_GI_23308571-S        | BB1                                      | 8415.827 |
| 12615 | RC_AA205724_at_NA_illumina     | EST: zq69c06.s1 Stratagene               | 8418.499 |
| 12616 | RC_AA347288_at_GI_41406075-A   | Growth arrest-specific 7                 | 8423.563 |
| 12617 | D26308_at_GI_4502418-S         | NADPH-flavin reductase                   | 8426.178 |
| 12618 | AA478704_at_NA_illumina        | Interleukin 13 receptor, alpha 1         | 8429.052 |
| 12619 | RC_AA045596_at_GI_7705814-S    | EST: zl66d11.s1 Stratagene colon         | 8434.992 |
| 12620 | M74542_at_GI_22907048-S        | ALDH3 Aldehyde dehydrogenase 3           | 8436.488 |
| 12621 | RC_AA234561_at_NA_illumina     | EST: zr66c06.s1 Soares NhHMPu S1         | 8437.433 |
| 12622 | RC_AA443962_at_GI_34222309-S   | EST: zv51f04.s1 Soares testis NHT Homo   | 8438.414 |
| 12623 | W63627_at_NA_illumina          | KIAA0331 gene product                    | 8440.723 |
| 12624 | D50911_at_NA_illumina          | KIAA0121 gene                            | 8445.395 |
| 12625 | RC_AA425753_at_NA_illumina     | EST: zw49d02.s1 Soares total fetus       | 8447.345 |
| 12626 | M32578_at_NA_illumina          | HLA-DRB1 Major histocompatibility        | 8450.58  |
| 12627 | U50136_rna1_at_GI_22035628-A   | Leukotriene C4 synthase (LTC4S) gene     | 8453.213 |
| 12628 | X57579_s_at_NA_illumina        | Activin beta-A subunit (exon 2)          | 8453.769 |
| 12629 | RC_AA447368_s_at_NA_illumina   | EST: zw87b08.s1 Soares total fetus       | 8456.854 |
| 12630 | RC_AA431482_s_at_NA_illumina   | Homo sapiens mRNA for KIAA0465           | 8457.999 |

|       |                                |                                              |           |
|-------|--------------------------------|----------------------------------------------|-----------|
| 12631 | RC_AA446666_at_NA_illumina     | EST: zw89h10.s1 Soares total fetus           | 8461.386  |
| 12632 | AA233993_at_GI_26006850-S      | EST: zr50f05.r1 Soares NhHMPu S1             | 8463.564  |
| 12633 | RC_AA253390_s_at_NA_illumina   | Tetraspan 5                                  | 8467.273  |
| 12634 | RC_AA129923_at_NA_illumina     | Ceroid-lipofuscinosis, neuronal 2, late      | 8467.384  |
| 12635 | AA400177_at_NA_illumina        | EST: zu69e07.r1 Soares testis NHT Homo       | 8470.878  |
| 12636 | X63546_s_at_NA_illumina        | UBIQUITIN CARBOXYL-TERMINAL                  | 8472.402  |
| 12637 | RC_AA488885_at_NA_illumina     | EST: aa55f10.s1 NCI_CGAP_GCB1 Homo           | 8477.326  |
| 12638 | RC_AA418726_at_NA_illumina     | KIAA0763 gene product                        | 8478.14   |
| 12639 | U07919_at_GI_4502040-S         | ALDH6 Aldehyde dehydrogenase 6               | 8480.441  |
| 12640 | RC_AA479533_at_NA_illumina     | EST: zu36h10.s1 Soares ovary tumor           | 8485.218  |
| 12641 | RC_AA463692_s_at_NA_illumina   | Homo sapiens (clone S164) mRNA, 3' end       | 8489.815  |
| 12642 | RC_AA427606_at_NA_illumina     | RNA binding motif protein 4                  | 8491.247  |
| 12643 | RC_AA482224_f_at_NA_illumina   | EST: ab15c03.s1 Stratagene lung              | 8492.631  |
| 12644 | X64330_at_GI_38569420-S        | ATP-citrate lyase                            | 8494.6455 |
| 12645 | Y00062_at_GI_18641365-A        | PTPRC Protein tyrosine phosphatase,          | 8496.841  |
| 12646 | D10522_at_GI_11125771-S        | MACS Myristoylated alanine-rich C-kinase     | 8497.346  |
| 12647 | L27560_at_NA_illumina          | Insulin-like growth factor binding protein 5 | 8501.232  |
| 12648 | RC_AA477717_at_NA_illumina     | Breakpoint cluster region protein, uterine   | 8503.226  |
| 12649 | M17252_at_GI_20522237-S        | CYP21 Cytochrome P450, subfamily XXI         | 8507.49   |
| 12650 | RC_AA400183_at_GI_29729561-S   | EST: zu64d03.s1 Soares testis NHT Homo       | 8511.461  |
| 12651 | RC_AA476326_at_GI_20127610-S   | EST: zw99b11.s1 Soares total fetus           | 8512.269  |
| 12652 | R61154_at_GI_18496982-S        | EST: yh10d07.r1 Homo sapiens cDNA            | 8524.384  |
| 12653 | U48705_rna1_s_at_GI_38327631-A | Receptor tyrosine kinase DDR gene            | 8525.831  |
| 12654 | RC_AA436880_at_NA_illumina     | EST: zv59g06.s1 Soares testis NHT Homo       | 8527.997  |
| 12655 | C00021_s_at_NA_illumina        | EST: HUMGS0002519, Human Gene                | 8528.214  |
| 12656 | RC_AA416965_s_at_GI_18105051-  | Gap junction protein, alpha 1, 43kD          | 8529.731  |
| 12657 | RC_AA425444_at_NA_illumina     | Human Chromosome 16 BAC clone                | 8532.117  |
| 12658 | RC_AA279337_at_GI_40018625-S   | EST: zs85b03.s1 NCI_CGAP_GCB1                | 8534.198  |
| 12659 | W28944_at_NA_illumina          | EST: 54h12 Human retina cDNA randomly        | 8536.268  |
| 12660 | H60661_at_GI_15011943-A        | EST: yr13d05.r1 Homo sapiens cDNA            | 8537.239  |
| 12661 | U41518_at_NA_illumina          | AQP1 Aquaporin 1 (channel-forming            | 8539.994  |
| 12662 | RC_AA280840_at_NA_illumina     | Homo sapiens casein kinase I gamma 2         | 8546.243  |
| 12663 | N77277_at_NA_illumina          | EST: yv43a07.r1 Soares fetal liver spleen    | 8547.929  |
| 12664 | H83753_at_NA_illumina          | EST: yv84e06.r1 Homo sapiens cDNA            | 8553.915  |
| 12665 | D63475_at_GI_14917108-S        | KIAA0109 gene                                | 8556.769  |
| 12666 | RC_AA082057_at_GI_42516560-I   | EST: zn21f01.s1 Stratagene                   | 8558.284  |
| 12667 | AA215299_s_at_NA_illumina      | Homo sapiens chromosome 19, cosmid           | 8558.691  |
| 12668 | AA410200_at_NA_illumina        | EST: zv32d11.r1 Soares ovary tumor           | 8560.211  |
| 12669 | RC_D51006_s_at_GI_40789262-S   | EST: Human fetal brain cDNA 3'-end GEN-      | 8562.48   |
| 12670 | U97519_at_GI_33598949-S        | Podocalyxin-like                             | 8567.218  |
| 12671 | R79299_at_NA_illumina          | EST: yi84g06.r1 Homo sapiens cDNA            | 8573.953  |
| 12672 | RC_AA258613_at_NA_illumina     | EST: zr60f05.s1 Soares NhHMPu S1             | 8575.619  |
| 12673 | W63793_at_NA_illumina          | S-adenosylmethionine decarboxylase 1         | 8576.401  |

|       |                                |                                            |           |
|-------|--------------------------------|--------------------------------------------|-----------|
| 12674 | AA010750_at_GI_32455253-A      | EST: ze22c01.r1 Soares fetal heart         | 8578.942  |
| 12675 | AA036900_at_NA_illumina        | EST: zk29e11.r1 Soares pregnant uterus     | 8581.525  |
| 12676 | H39627_at_NA_illumina          | EST: yo56f08.r1 Homo sapiens cDNA          | 8585.454  |
| 12677 | R77539_at_NA_illumina          | EST: yi76c08.r1 Homo sapiens cDNA          | 8594.643  |
| 12678 | L31860_at_GI_8051602-S         | GYPA Glycophorin A                         | 8595.381  |
| 12679 | L31860_at-2_NA_illumina        | Glycophorin A (includes MN blood group)    | 8595.381  |
| 12680 | RC_AA252759_at_GI_20336261-S   | EST: zs27c08.s1 NCI_CGAP_GCB1              | 8596.281  |
| 12681 | Z48199_at_GI_29568085-S        | SDC1 Syndecan 1                            | 8597.334  |
| 12682 | H05871_at_NA_illumina          | EST: yl73f05.r1 Homo sapiens cDNA clone    | 8600.324  |
| 12683 | RC_AA452116_at_NA_illumina     | EST: zx15c02.s1 Soares total fetus         | 8600.504  |
| 12684 | U46499_at_GI_22035637-A        | GLUTATHIONE S-TRANSFERASE,                 | 8602.195  |
| 12685 | U21128_at_GI_21359858-S        | LUM Lumican                                | 8603.021  |
| 12686 | H15314_at_GI_29550849-A        | EST: ym28c02.r1 Homo sapiens cDNA          | 8607.483  |
| 12687 | D49394_at_GI_4504542-S         | HTR3 5-hydroxytryptamine (serotonin)       | 8618.565  |
| 12688 | RC_AA465218_at_GI_24308076-S   | EST: aa24e12.s1 NCI_CGAP_GCB1              | 8619.955  |
| 12689 | AA458602_at_GI_17865806-S      | EST: aa12f12.r1 Soares NhHMPu S1           | 8625.997  |
| 12690 | AA248555_at_GI_14249375-S      | EST: csh0348.seq.F Human fetal heart,      | 8630.272  |
| 12691 | RC_AA053348_r_at_NA_illumina   | Homo sapiens bone morphogenetic            | 8639.3125 |
| 12692 | AF010193_at_NA_illumina        | MAD-related gene SMAD7 (SMAD7)             | 8639.383  |
| 12693 | AF010193_at-2_NA_illumina      | Homo sapiens MAD-related gene SMAD7        | 8639.383  |
| 12694 | AF000425_at_NA_illumina        | Homo sapiens LST1 mRNA, cLST1/A            | 8646.236  |
| 12695 | X07109_at_NA_illumina          | (clones lambda-hPKC-beta[15,802])          | 8649.417  |
| 12696 | AA135915_at_GI_30581114-A      | EST: zl19f04.r1 Soares pregnant uterus     | 8651.557  |
| 12697 | AA150661_at_NA_illumina        | Jumonji (mouse) homolog                    | 8652.932  |
| 12698 | RC_AA147218_s_at_NA_illumina   | EST: zo64g03.s1 Stratagene pancreas        | 8655.9    |
| 12699 | RC_AA281214_s_at_GI_41393546-  | EST: zs94c04.s1 NCI_CGAP_GCB1              | 8657.774  |
| 12700 | RC_AA496685_s_at_GI_4507320-S  | Suppressor of variegation 3-9 (Drosophila) | 8663.407  |
| 12701 | W28790_at_NA_illumina          | EST: 54g3 Human retina cDNA randomly       | 8664.76   |
| 12702 | RC_AA070862_at_NA_illumina     | EST: zm58c10.s1 Stratagene fibroblast      | 8669.219  |
| 12703 | U05681_s_at_GI_20336471-S      | Proto-oncogene BCL3 gene                   | 8670.275  |
| 12704 | RC_AA454840_s_at_NA_illumina   | EST: zx79d09.s1 Soares ovary tumor         | 8675.683  |
| 12705 | RC_AA404588_at_NA_illumina     | Homo sapiens herpesvirus entry protein B   | 8676.348  |
| 12706 | AA437015_at_NA_illumina        | EST: zv58g02.r1 Soares testis NHT Homo     | 8676.681  |
| 12707 | RC_AA262943_at_NA_illumina     | EST: zr71a09.s1 Soares NhHMPu S1           | 8677.125  |
| 12708 | AB002310_at_NA_illumina        | Upstream regulatory element binding        | 8678.849  |
| 12709 | RC_AA463637_at_NA_illumina     | EST: zx98h04.s1 Soares NhHMPu S1           | 8682.28   |
| 12710 | U76362_at_GI_34147563-S        | Human retinal glutamate transporter        | 8682.422  |
| 12711 | Z31560_s_at_GI_29826338-S      | SOX2 SRY (sex determining region Y)-box    | 8682.767  |
| 12712 | RC_AA446561_at_NA_illumina     | KIAA0470 gene product                      | 8682.937  |
| 12713 | HG1595-HT4788_s_at_NA_illumina | Heterogeneous Nuclear Ribonucleoprotein    | 8683.774  |
| 12714 | RC_AA504334_at_NA_illumina     | EST: aa61f02.s1 NCI_CGAP_GCB1 Homo         | 8683.983  |
| 12715 | RC_AA410469_at_NA_illumina     | EST: zv15g11.s1 Soares NhHMPu S1           | 8691.732  |
| 12716 | RC_AA079135_at_NA_illumina     | EST: zm98f06.s1 Stratagene colon HT29      | 8695.52   |



|       |                                |                                            |          |
|-------|--------------------------------|--------------------------------------------|----------|
| 12717 | RC_AA404988_at_GI_42659248-S   | Homo sapiens mRNA for KIAA0674             | 8701.745 |
| 12718 | H89551_s_at_NA_illumina        | EST: yw28e07.r1 Homo sapiens cDNA          | 8703.753 |
| 12719 | X83218_at_NA_illumina          | ATP5O ATP synthase, H+ transporting,       | 8704.455 |
| 12720 | R64199_at_NA_illumina          | Vesicle trafficking protein sec22b         | 8707.272 |
| 12721 | AA095041_at_GI_34147446-S      | EST: cp2556.seq.F Fetal heart, Lambda      | 8707.523 |
| 12722 | N33807_at_NA_illumina          | EST: yx73b07.r1 Homo sapiens cDNA          | 8707.911 |
| 12723 | RC_AA258738_at_NA_illumina     | UBIQUITIN                                  | 8710.874 |
| 12724 | M32977_s_at_NA_illumina        | Vascular endothelial growth factor         | 8710.895 |
| 12725 | M31551_s_at_GI_4505594-S       | PAI2 Plasminogen activator inhibitor, type | 8711.186 |
| 12726 | AA313653_at_GI_7705482-S       | EST: EST185526 Colon carcinoma (HCC)       | 8718.376 |
| 12727 | R79750_at_NA_illumina          | Orphan nuclear hormone receptor            | 8718.775 |
| 12728 | RC_AA279292_at_NA_illumina     | EST: zs84a09.s1 NCI_CGAP_GCB1              | 8727.755 |
| 12729 | U36341_rna1_at_GI_5032096-S    | SLC6A8 gene (creatine transporter)         | 8730.24  |
| 12730 | RC_AA598439_at_NA_illumina     | EST: ae48e11.s1 Stratagene lung            | 8730.778 |
| 12731 | AA251497_at_GI_24475963-S      | EST: zs10d01.r1 NCI_CGAP_GCB1 Homo         | 8736.935 |
| 12732 | RC_AA004662_at_NA_illumina     | EST: zh92f05.s1 Soares fetal liver spleen  | 8736.979 |
| 12733 | M84349_at_GI_42716300-S        | CD59 CD59 antigen p18-20 (antigen          | 8738.84  |
| 12734 | RC_AA454874_at_NA_illumina     | EST: zx79h01.s1 Soares ovary tumor         | 8741.033 |
| 12735 | N23801_at_NA_illumina          | EST: yx36b12.r1 Homo sapiens cDNA          | 8743.262 |
| 12736 | RC_AA620598_at_NA_illumina     | EST: ae60h08.s1 Stratagene lung            | 8745.541 |
| 12737 | RC_AA015607_s_at_GI_13128995-  | EST: ze20d10.s1 Soares fetal heart         | 8746.835 |
| 12738 | C01833_at_GI_42734429-S        | EST: HUMGS0003801, Human Gene              | 8752.757 |
| 12739 | RC_AA252762_at_GI_39930390-S   | EST: zs27c12.s1 NCI_CGAP_GCB1              | 8754.172 |
| 12740 | RC_AA287107_s_at_NA_illumina   | EST: zs58f12.s1 NCI_CGAP_GCB1 Homo         | 8759.645 |
| 12741 | RC_AA047290_at_NA_illumina     | EST: zk74f05.s1 Soares pregnant uterus     | 8761.778 |
| 12742 | L76191_at_GI_4755143-S         | Interleukin-1 receptor-associated kinase   | 8762.721 |
| 12743 | RC_AA379087_s_at_GI_14670384-  | EST: EST91878 Skin tumor I Homo            | 8765.813 |
| 12744 | HG2238-HT2321_s_at_NA_illumina | Nuclear Mitotic Apparatus Protein 1, Alt.  | 8777.324 |
| 12745 | AA316686_s_at_NA_illumina      | EST: EST188361 HCC cell line               | 8786.866 |
| 12746 | L42451_at_GI_31543388-S        | Pyruvate dehydrogenase kinase              | 8789.707 |
| 12747 | L42451_at-2_NA_illumina        | Pyruvate dehydrogenase kinase,             | 8789.707 |
| 12748 | X87344_cds10_r_at_NA_illumina  | DMA gene extracted from H.sapiens DMA,     | 8798.044 |
| 12749 | AA215970_at_NA_illumina        | EST: hp0142.seq.F Fetal heart, Lambda      | 8804.44  |
| 12750 | J03580_s_at_NA_illumina        | Parathyroid hormone-like hormone           | 8805.335 |
| 12751 | U16954_at_NA_illumina          | (AF1q) mRNA                                | 8805.5   |
| 12752 | AA129545_at_GI_8923103-S       | EST: zn83b08.r1 Stratagene lung            | 8806.427 |
| 12753 | RC_AA485424_at_GI_34365798-S   | EST: zx90e04.s1 Soares ovary tumor         | 8806.753 |
| 12754 | AA363338_at_NA_illumina        | Ubiquitin protein ligase E3A (human        | 8811.882 |
| 12755 | X82200_at_GI_15208661-S        | Staf50 mRNA                                | 8813.595 |
| 12756 | X05276_at_GI_4507650-S         | TPM4 Tropomyosin 4 (fibroblast)            | 8819.601 |
| 12757 | RC_AA400022_at_NA_illumina     | EST: zu68e12.s1 Soares testis NHT Homo     | 8820.476 |
| 12758 | RC_AA197180_at_NA_illumina     | EST: zq11a05.s1 Stratagene muscle          | 8826.976 |
| 12759 | D87451_at_GI_34452680-S        | KIAA0262 gene                              | 8827.041 |

|       |                              |                                          |           |
|-------|------------------------------|------------------------------------------|-----------|
| 12760 | RC_AA621414_s_at_NA_illumina | Claudin 5 (transmembrane protein deleted | 8831.509  |
| 12761 | RC_AA416697_at_GI_37551909-S | EST: zu08e02.s1 Soares testis NHT Homo   | 8834.55   |
| 12762 | RC_AA428632_at_GI_28274693-S | EST: zw69a09.s1 Soares testis NHT        | 8836.841  |
| 12763 | RC_AA018040_at_GI_45545432-A | EST: ze51a11.s1 Soares retina N2b4HR     | 8838.5205 |
| 12764 | RC_AA424013_at_GI_34577067-S | Homo sapiens clone 23767 and 23782       | 8841.575  |
| 12765 | RC_AA173080_at_NA_illumina   | EST: zp21g07.s1 Stratagene               | 8843.537  |
| 12766 | RC_AA047880_at_NA_illumina   | EST: zf50c04.s1 Soares retina N2b4HR     | 8845.265  |
| 12767 | RC_AA234963_at_GI_34304335-A | C3HC4-type zinc finger protein           | 8847.1    |
| 12768 | W26197_at_NA_illumina        | Ribosomal protein S27 (metalloprotein)   | 8847.801  |
| 12769 | RC_AA461174_at_GI_31377763-S | EST: zx70c04.s1 Soares total fetus       | 8852.924  |
| 12770 | AA248079_at_GI_24475978-S    | EST: cp2131.seq.F Human fetal heart,     | 8854.351  |
| 12771 | RC_AA417287_at_GI_4557498-A  | C-terminal binding protein 2             | 8856.136  |
| 12772 | Y08976_at_NA_illumina        | FEV protein                              | 8857.907  |
| 12773 | M15661_at_GI_34335143-S      | RPL44 Ribosomal protein L44              | 8857.938  |
| 12774 | W28106_at_NA_illumina        | EST: 42b12 Human retina cDNA randomly    | 8859.219  |
| 12775 | W55903_at_NA_illumina        | Adipose differentiation-related protein; | 8861.181  |
| 12776 | D31846_at_GI_33624912-S      | AQP2 Aquaporin 2 (collecting duct)       | 8863.207  |
| 12777 | RC_AA454937_at_GI_30061497-A | EST: aa30c07.s1 NCI_CGAP_GCB1            | 8863.243  |
| 12778 | RC_AA425906_at_NA_illumina   | EST: zw17h06.s1 Soares ovary tumor       | 8863.87   |
| 12779 | RC_AA599808_at_GI_21361733-S | EST: ag32b01.s1 Jia bone marrow stroma   | 8866.752  |
| 12780 | RC_AA609346_at_NA_illumina   | EST: zu71b11.s1 Soares testis NHT Homo   | 8867.019  |
| 12781 | RC_D59924_at_NA_illumina     | EST: Human fetal brain cDNA 3'-end GEN-  | 8869.196  |
| 12782 | X87241_at-2_NA_illumina      | FAT tumor suppressor (Drosophila)        | 8874.68   |
| 12783 | X87241_at_GI_4885228-S       | HFat protein                             | 8874.68   |
| 12784 | RC_AA418020_at_GI_38570145-S | EST: zv94h02.s1 Soares NhHMPu S1         | 8882.504  |
| 12785 | RC_AA491295_at_NA_illumina   | Homo sapiens mRNA for KIAA0787           | 8884.422  |
| 12786 | X74801_at_GI_31542291-S      | T-COMPLEX PROTEIN 1, GAMMA               | 8887.538  |
| 12787 | AA093378_at_NA_illumina      | EST: k7881.seq.F Fetal heart, Lambda     | 8887.595  |
| 12788 | RC_AA398197_at_NA_illumina   | EST: zt59a08.s1 Soares testis NHT Homo   | 8888.294  |
| 12789 | Y00705_at_NA_illumina        | SPINK1 Serine protease inhibitor, Kazal  | 8891.383  |
| 12790 | U02020_at_GI_33386694-A      | Pre-B cell enhancing factor (PBEF) mRNA  | 8893.265  |
| 12791 | RC_AA025663_at_GI_39812393-S | EST: ze90f09.s1 Soares fetal heart       | 8894.87   |
| 12792 | RC_AA443684_at_NA_illumina   | EST: zw86d01.s1 Soares total fetus       | 8895.683  |
| 12793 | X04412_at_GI_38044287-A      | GSN Gelsolin (amyloidosis, Finnish type) | 8897.231  |
| 12794 | L40391_at_NA_illumina        | (clone s153) mRNA fragment               | 8897.544  |
| 12795 | RC_AA424590_at_GI_32481217-A | Homo sapiens putative 13 S Golgi         | 8906.738  |
| 12796 | RC_AA621440_at_GI_38455389-S | EST: af35g10.s1 Soares total fetus       | 8909.105  |
| 12797 | X99688_at_GI_28626518-S      | mRNA from TYL gene                       | 8914.957  |
| 12798 | RC_AA129128_f_at_NA_illumina | EST: zo09h09.s1 Stratagene               | 8916.127  |
| 12799 | U47634_at_NA_illumina        | TUBB Beta-tubulin                        | 8920.078  |
| 12800 | RC_AA286807_at_NA_illumina   | EST: zs54a01.s1 NCI_CGAP_GCB1            | 8922.459  |
| 12801 | RC_AA281159_at_NA_illumina   | Homo sapiens mRNA for beta-tubulin       | 8923.274  |
| 12802 | RC_AA047034_at_GI_33238871-S | EST: zf50b11.s1 Soares retina N2b4HR     | 8925.373  |

|       |                              |                                          |           |
|-------|------------------------------|------------------------------------------|-----------|
| 12803 | AA096178_at_GI_22095346-S    | EST: I8434.seq.F Fetal heart, Lambda     | 8933.5625 |
| 12804 | RC_AA401452_at_NA_illumina   | EST: zu56e12.s1 Soares ovary tumor       | 8933.862  |
| 12805 | RC_AA280032_at_NA_illumina   | EST: zs93c02.s1 NCI_CGAP_GCB1            | 8935.161  |
| 12806 | RC_AA282505_at_GI_33457331-S | EST: zs90a02.s1 NCI_CGAP_GCB1            | 8935.267  |
| 12807 | RC_AA426011_at_GI_37221178-S | EST: zw49f01.s1 Soares total fetus       | 8935.859  |
| 12808 | RC_AA463934_at_GI_23111059-S | Human spliceosomal protein (SAP 49)      | 8935.985  |
| 12809 | H78550_at_NA_illumina        | EST: yu13g03.r1 Homo sapiens cDNA        | 8936.188  |
| 12810 | M75099_at_GI_17149843-A      | FRAP FK506 binding protein 12-rapamycin  | 8936.382  |
| 12811 | M19722_at_GI_4885234-S       | FGR Gardner-Rasheed feline sarcoma       | 8938.275  |
| 12812 | U88964_at_GI_34147571-S      | HEM45 mRNA                               | 8938.896  |
| 12813 | RC_AA460273_at_GI_15011942-S | Homo sapiens mRNA for KIAA0517           | 8939.905  |
| 12814 | AA091467_s_at_GI_36054193-S  | Homo sapiens CAGH1a (CAGH1) mRNA,        | 8941.216  |
| 12815 | H88496_s_at_GI_18378730-S    | EST: yw21g11.r1 Homo sapiens cDNA        | 8946.896  |
| 12816 | RC_AA134138_at_GI_41393560-S | EST: zl29g04.s1 Soares pregnant uterus   | 8950.554  |
| 12817 | RC_AA258572_at_NA_illumina   | EST: zr62e05.s1 Soares NhHMPu S1         | 8958.187  |
| 12818 | M11119_at_NA_illumina        | Endogenous retrovirus envelope region    | 8958.946  |
| 12819 | RC_AA416895_at_GI_29558098-A | EST: zt94f10.s1 Soares testis NHT Homo   | 8965.64   |
| 12820 | RC_AA088228_at_NA_illumina   | EST: zl82d04.s1 Stratagene colon         | 8966.111  |
| 12821 | RC_AA610119_at_NA_illumina   | EST: af19h02.s1 Soares total fetus       | 8971.362  |
| 12822 | D13370_at_GI_18375502-A      | DNA-(APURINIC OR APYRIMIDINIC            | 8972.495  |
| 12823 | RC_AA411501_at_GI_45580693-S | EST: zv27g02.s1 Soares ovary tumor       | 8976.299  |
| 12824 | C00038_s_at_GI_31377721-S    | EST: HUMGS0003443, Human Gene            | 8982.697  |
| 12825 | RC_AA262340_at_GI_24307902-S | EST: zr71g09.s1 Soares NhHMPu S1         | 8983.395  |
| 12826 | RC_AA236230_at_GI_7706574-S  | EST: zr51c09.s1 Soares NhHMPu S1         | 8983.432  |
| 12827 | RC_AA598441_at_GI_23397665-S | EST: ae48f01.s1 Stratagene lung          | 8986.626  |
| 12828 | RC_AA621179_at_NA_illumina   | Homo sapiens clone 23899 mRNA            | 8989.493  |
| 12829 | L21998_at_GI_4505284-S       | MUC2 Mucin 2, intestinal/tracheal        | 8993.193  |
| 12830 | RC_AA456042_s_at_NA_illumina | EST: aa03d05.s1 Soares NhHMPu S1         | 8993.635  |
| 12831 | HG4322-HT4592_at_NA_illumina | Tubulin, Beta                            | 8993.847  |
| 12832 | X95325_s_at_NA_illumina      | DNA-BINDING PROTEIN A                    | 8995.084  |
| 12833 | RC_AA011682_at_GI_30089959-A | KIAA0451 gene product                    | 9000.149  |
| 12834 | AA400632_s_at_GI_38455393-S  | EST: zu70f01.r1 Soares testis NHT Homo   | 9000.394  |
| 12835 | RC_AA100089_at_NA_illumina   | EST: zl81a04.s1 Stratagene colon         | 9007.588  |
| 12836 | RC_AA292717_at_GI_19923670-S | EST: zs59e08.s1 NCI_CGAP_GCB1            | 9011.027  |
| 12837 | RC_AA235803_f_at_NA_illumina | EST: zs42g06.s1 Soares NhHMPu S1         | 9011.4795 |
| 12838 | M31994_at_GI_25777722-S      | ALDH1 Aldehyde dehydrogenase 1,          | 9011.805  |
| 12839 | RC_D60642_f_at_NA_illumina   | Homo sapiens mRNA for KIAA0903           | 9018.423  |
| 12840 | W58258_s_at_NA_illumina      | Keratin, hair, basic, 5                  | 9020.265  |
| 12841 | RC_AA291624_s_at_NA_illumina | EST: zt45e11.s1 Soares ovary tumor       | 9028.204  |
| 12842 | RC_AA464722_s_at_NA_illumina | EST: zx82d05.s1 Soares ovary tumor       | 9028.84   |
| 12843 | M26576_cds2_at_GI_45580690-S | COL4A1 gene (alpha-1 type IV collagen)   | 9030.226  |
| 12844 | Y00486_rna1_at_GI_4502170-S  | Adenine phosphoribosyltransferase (aprt) | 9036.872  |
| 12845 | R32932_at_NA_illumina        | EST: yh71e07.r1 Homo sapiens cDNA        | 9042.7295 |

|       |                              |                                              |           |
|-------|------------------------------|----------------------------------------------|-----------|
| 12846 | S76942_s_at_GI_32483396-S    | Dopamine D4 receptor {exon 1} [human,        | 9048.957  |
| 12847 | S76942_s_at-2_NA_illumina    | Dopamine receptor D4                         | 9048.957  |
| 12848 | RC_AA447617_at_NA_illumina   | EST: zw97a02.s1 Soares total fetus           | 9050.721  |
| 12849 | AA235209_at_GI_37674288-S    | EST: zs36d09.r1 Soares NhHMPu S1             | 9051.903  |
| 12850 | K03430_at_GI_11038661-S      | C1QB Complement component 1, q               | 9058.354  |
| 12851 | U53204_at_GI_4505876-A       | Plectin (PLEC1) mRNA                         | 9062.122  |
| 12852 | RC_AA417030_at_NA_illumina   | EST: zu04e07.s1 Soares testis NHT Homo       | 9064.718  |
| 12853 | RC_AA455962_at_NA_illumina   | EST: aa16g12.s1 Soares NhHMPu S1             | 9064.797  |
| 12854 | AA436304_at_GI_6042206-S     | GTP-BINDING NUCLEAR PROTEIN RAN              | 9066.165  |
| 12855 | AA194766_at_GI_31340688-S    | Homo sapiens mRNA for KIAA0850               | 9071.293  |
| 12856 | RC_AA433946_at_GI_41350203-S | EST: zw52g09.s1 Soares total fetus           | 9072.293  |
| 12857 | AA417129_at_NA_illumina      | Variably charged, Y chromosome               | 9097.129  |
| 12858 | M14200_rna1_at_GI_24475624-S | Diazepam binding inhibitor (DBI) mRNA        | 9099.049  |
| 12859 | D84294_at_GI_21359840-S      | TPRD                                         | 9102.096  |
| 12860 | AA007264_at_GI_5730024-S     | EST: zh97e06.r1 Soares fetal liver spleen    | 9104.029  |
| 12861 | RC_AA496936_at_NA_illumina   | EST: ae32d03.s1 Gessler Wilms tumor          | 9105.957  |
| 12862 | R17296_at_GI_34304324-S      | EST: yg12a12.r1 Homo sapiens cDNA            | 9111.9795 |
| 12863 | U20758_rna1_at_GI_38146097-S | Osteopontin gene                             | 9115.482  |
| 12864 | RC_AA480993_at_NA_illumina   | EST: aa28h03.s1 NCI_CGAP_GCB1                | 9115.632  |
| 12865 | RC_AA478300_at_GI_4557422-S  | CD39-like 2                                  | 9115.804  |
| 12866 | RC_AA479048_at_NA_illumina   | EST: zu36f09.s1 Soares ovary tumor           | 9115.983  |
| 12867 | RC_AA176164_f_at_NA_illumina | EST: zp23h11.s1 Stratagene                   | 9124.06   |
| 12868 | AF004022_at_GI_4759177-S     | Serine/threonine kinase 12                   | 9126.61   |
| 12869 | D63851_at_GI_4507296-S       | Unc-18 homologue                             | 9132.381  |
| 12870 | U07802_at_GI_15812177-S      | ERF-2 mRNA                                   | 9138.299  |
| 12871 | RC_AA151393_at_NA_illumina   | EST: zl43a10.s1 Soares pregnant uterus       | 9144.61   |
| 12872 | W28548_at_NA_illumina        | EST: 48d1 Human retina cDNA randomly         | 9146.024  |
| 12873 | J04040_at_GI_20302161-S      | GCG Glucagon                                 | 9146.156  |
| 12874 | RC_AA291260_at_NA_illumina   | EST: zs18a04.s1 NCI_CGAP_GCB1                | 9147.981  |
| 12875 | W27770_at_GI_42490745-A      | EST: 37f9 Human retina cDNA randomly         | 9148.409  |
| 12876 | M13450_at_NA_illumina        | ESD Esterase D/formylglutathione             | 9153.842  |
| 12877 | AB002340_at_NA_illumina      | KIAA0342 gene product                        | 9158.784  |
| 12878 | W69310_at_NA_illumina        | PTK2 protein tyrosine kinase 2               | 9159.469  |
| 12879 | RC_AA465363_at_NA_illumina   | EST: aa23d02.s1 NCI_CGAP_GCB1                | 9163.262  |
| 12880 | X62534_s_at_GI_14141173-S    | HMG2 High-mobility group (nonhistone         | 9166.159  |
| 12881 | AF005271_at_GI_4503768-S     | FMFRamide-related peptide precursor          | 9166.75   |
| 12882 | RC_AA235289_at_GI_31377551-S | EST: zs37e03.s1 Soares NhHMPu S1             | 9169.886  |
| 12883 | RC_AA496040_at_NA_illumina   | Homo sapiens mRNA for tob family,            | 9176.602  |
| 12884 | RC_AA609316_at_GI_37540547-S | EGF-like-domain, multiple 5                  | 9177.995  |
| 12885 | RC_AA421781_at_GI_20149567-S | Homo sapiens NADH:ubiquinone                 | 9179.126  |
| 12886 | M88108_at_GI_5730026-S       | P62 mRNA                                     | 9187.839  |
| 12887 | RC_AA130349_at_NA_illumina   | EST: zo19g09.s1 Stratagene colon             | 9191.989  |
| 12888 | M21305_at_NA_illumina        | Alpha satellite and satellite 3 junction DNA | 9192.292  |

|       |                               |                                            |           |
|-------|-------------------------------|--------------------------------------------|-----------|
| 12889 | M74719_at_GI_4507398-S        | SEF2-1A protein (SEF2-1A) mRNA, 5' end     | 9192.606  |
| 12890 | RC_AA521354_at_NA_illumina    | EST: aa68h12.s1 NCI_CGAP_GCB1              | 9192.969  |
| 12891 | U73379_at_GI_32967290-A       | Cyclin-selective ubiquitin carrier protein | 9195.646  |
| 12892 | AA058759_at_GI_22027477-A     | Homo sapiens mRNA for KIAA0461             | 9195.743  |
| 12893 | X56841_at_NA_illumina         | HLA-E MHC class I antigen HLA-E            | 9197.012  |
| 12894 | X69111_at_GI_32171181-S       | ID3 Inhibitor of DNA binding 3, dominant   | 9203.414  |
| 12895 | RC_AA417761_at_GI_42476153-S  | Homo sapiens clone 24416 mRNA              | 9208.039  |
| 12896 | RC_AA435633_at_GI_13540601-S  | Homo sapiens clone 23965 mRNA              | 9210.307  |
| 12897 | RC_AA449073_s_at_NA_illumina  | EST: zx06a08.s1 Soares total fetus         | 9221.332  |
| 12898 | RC_AA424484_at_NA_illumina    | EST: zv90a09.s1 Soares NhHMPu S1           | 9221.346  |
| 12899 | RC_AA259135_at_NA_illumina    | EST: zs30d01.s1 NCI_CGAP_GCB1              | 9224.732  |
| 12900 | RC_AA398933_at_GI_5730042-S   | EST: zt64h08.s1 Soares testis NHT Homo     | 9225.8545 |
| 12901 | RC_AA478411_at_NA_illumina    | Homo sapiens SH3-containing adaptor        | 9226.391  |
| 12902 | RC_AA084243_at_GI_34335244-A  | Homo sapiens mRNA for KIAA0479             | 9231.23   |
| 12903 | D30758_at_GI_41281459-S       | KIAA0050 gene                              | 9233.84   |
| 12904 | D30758_at-2_NA_illumina       | KIAA0050 gene product                      | 9233.84   |
| 12905 | X02544_at_GI_9257231-S        | ORM1 Orosomuroid 1                         | 9245.279  |
| 12906 | X12530_s_at_NA_illumina       | CD20 RECEPTOR                              | 9256.105  |
| 12907 | RC_AA461086_at_GI_15812211-A  | EST: zx63e10.s1 Soares total fetus         | 9257.983  |
| 12908 | U72512_at_NA_illumina         | B-cell receptor associated protein (hBAP)  | 9261.679  |
| 12909 | RC_D51169_s_at_NA_illumina    | Replication protein A2 (32kD)              | 9270.176  |
| 12910 | K02574_at_GI_4557800-S        | NP Nucleoside phosphorylase                | 9273.238  |
| 12911 | M33552_at_GI_10880978-S       | Lymphocyte-specific protein 1 (LSP1)       | 9279.076  |
| 12912 | U09937_rna1_s_at_GI_4505864-S | Urokinase-type plasminogen activator       | 9284.093  |
| 12913 | AA094785_at_GI_23111040-A     | Sorting nexin 3                            | 9285.991  |
| 12914 | RC_AA459310_f_at_NA_illumina  | EST: zx89d06.s1 Soares ovary tumor         | 9286.438  |
| 12915 | R73427_at_GI_28872791-A       | EST: yl10a10.r1 Homo sapiens cDNA          | 9289.438  |
| 12916 | RC_AA427955_at_GI_4503578-S   | Erythrocyte membrane protein band 4.1-     | 9293.848  |
| 12917 | RC_D59675_i_at_GI_10047133-A  | EST: Human fetal brain cDNA 3'-end GEN-    | 9298.528  |
| 12918 | AA443437_at_GI_7706674-S      | EST: zw94b07.r1 Soares total fetus         | 9302.65   |
| 12919 | J02883_at_GI_11496883-S       | CLPS Colipase, pancreatic                  | 9306.888  |
| 12920 | M85289_at_GI_7427516-S        | HSPG2 Heparan sulfate proteoglycan         | 9308.978  |
| 12921 | RC_AA436459_at_NA_illumina    | Nuclear factor I/X (CCAAT-binding          | 9310.359  |
| 12922 | RC_AA496030_s_at_GI_39725666- | EST: zv72c09.s1 Soares total fetus         | 9331.785  |
| 12923 | RC_AA521292_at_NA_illumina    | EST: aa79e05.s1 NCI_CGAP_GCB1              | 9335.219  |
| 12924 | L37033_at_GI_17149850-S       | FK-506 binding protein homologue           | 9335.279  |
| 12925 | M27783_s_at_NA_illumina       | ELA2 Elastatse 2, neutrophil               | 9338.542  |
| 12926 | RC_AA490107_at_NA_illumina    | Homo sapiens mRNA for JM5 protein,         | 9342.778  |
| 12927 | M92934_at_GI_4503122-S        | CTGF Connective tissue growth factor       | 9348.744  |
| 12928 | U27768_at_GI_38201693-S       | RGP4 mRNA                                  | 9349.789  |
| 12929 | W19196_at_NA_illumina         | Chromosome 21 open reading frame 2         | 9353.567  |
| 12930 | AA505198_at_NA_illumina       | EST: aa58c03.r1 NCI_CGAP_GCB1 Homo         | 9354.812  |
| 12931 | RC_AA233744_at_GI_37541632-S  | EST: zr48g05.s1 Soares NhHMPu S1           | 9358.779  |

|       |                                |                                              |           |
|-------|--------------------------------|----------------------------------------------|-----------|
| 12932 | M28826_at_GI_4502644-S         | CD1B CD1b antigen (thymocyte antigen)        | 9361.07   |
| 12933 | M27826_at_NA_illumina          | Endogenous retroviral protease mRNA          | 9368.284  |
| 12934 | AA173998_at_GI_31377764-S      | Homo sapiens katanin p80 subunit mRNA,       | 9368.779  |
| 12935 | AA322982_at_GI_4503832-S       | Frizzled (Drosophila) homolog 7              | 9368.908  |
| 12936 | L33075_at_NA_illumina          | Ras GTPase-activating-like protein           | 9378.037  |
| 12937 | RC_AA293436_s_at_GI_10092596-  | EST: zt54c07.s1 Soares ovary tumor           | 9382.717  |
| 12938 | RC_AA423889_at_GI_13027379-S   | Homo sapiens mRNA for KIAA0549               | 9385.616  |
| 12939 | X85116_rna1_s_at_GI_38016906-A | Epb72 gene exon 1                            | 9389.311  |
| 12940 | RC_AA405724_at_NA_illumina     | EST: zu66d12.s1 Soares testis NHT Homo       | 9396.681  |
| 12941 | HG1649-HT1652_at_NA_illumina   | Elastase 1                                   | 9401.489  |
| 12942 | AA093977_at_NA_illumina        | EST: cl1504.seq.F Fetal heart, Lambda        | 9403.275  |
| 12943 | RC_AA485308_at_GI_22027645-S   | EST: ab09a07.s1 Stratagene lung              | 9406.788  |
| 12944 | HG627-HT5097_s_at_NA_illumina  | Rhesus (Rh) Blood Group System Ce-           | 9409.845  |
| 12945 | X76013_at_GI_4826959-S         | GLUTAMINYL-TRNA SYNTHETASE                   | 9411.351  |
| 12946 | L42379_at_GI_13325074-S        | Quiescin (Q6) mRNA, partial cds              | 9412.938  |
| 12947 | H19562_at_GI_42658525-S        | EST: yn54h07.r1 Homo sapiens cDNA            | 9413.699  |
| 12948 | W67291_s_at_NA_illumina        | EST: zd43b10.r1 Soares fetal heart           | 9415.838  |
| 12949 | AA419507_at_NA_illumina        | EST: zv03b07.r1 Soares NhHMPu S1             | 9416.836  |
| 12950 | RC_AA252161_at_NA_illumina     | EST: zr64c03.s1 Soares NhHMPu S1             | 9418.699  |
| 12951 | RC_AA421050_at_GI_37537686-S   | EST: zu09g09.s1 Soares testis NHT Homo       | 9421.777  |
| 12952 | AA249427_at_GI_24308304-S      | EST: j3756.seq.F Human fetal heart,          | 9430.225  |
| 12953 | RC_AA481283_at_NA_illumina     | EST: aa35d12.s1 NCI_CGAP_GCB1                | 9430.296  |
| 12954 | RC_AA490323_at_GI_4885584-S    | EST: aa51d04.s1 NCI_CGAP_GCB1                | 9430.377  |
| 12955 | D42043_at_GI_41872576-S        | KIAA0084 gene, partial cds                   | 9430.8125 |
| 12956 | S37730_s_at_GI_10835156-S      | Insulin-like growth factor binding protein-2 | 9433.341  |
| 12957 | RC_AA136884_at_NA_illumina     | EST: zl01e04.s1 Soares pregnant uterus       | 9433.561  |
| 12958 | AA443499_f_at_NA_illumina      | Keratin 8                                    | 9435.347  |
| 12959 | X59871_at_GI_42518079-S        | TCF7 Transcription factor 7 (T-cell          | 9437.297  |
| 12960 | RC_AA055607_at_GI_14042922-S   | EST: zl74h12.s1 Stratagene colon             | 9439.086  |
| 12961 | R26213_at_GI_4504848-S         | Potassium channel, subfamily K, member       | 9441.079  |
| 12962 | RC_AA007160_at_NA_illumina     | EST: 13cDNA30A-3.seq Soares infant           | 9443.357  |
| 12963 | AA090472_at_GI_33354248-S      | EST: y0502.seq.F Fetal heart, Lambda         | 9444.723  |
| 12964 | U97105_at_GI_19923654-S        | Dihydropyrimidinase related protein-2        | 9444.833  |
| 12965 | RC_AA255874_at_NA_illumina     | EST: zs19a03.s1 NCI_CGAP_GCB1                | 9446.673  |
| 12966 | RC_AA386264_at_GI_40254923-S   | EST: EST07569 Fetal brain Homo sapiens       | 9450.008  |
| 12967 | L10413_at_NA_illumina          | FNTA Farnesyltransferase, CAAX box,          | 9456.313  |
| 12968 | M29064_at_GI_14043073-A        | HNRPA2B1 Heterogeneous nuclear               | 9456.503  |
| 12969 | RC_AA028942_at_GI_42661667-S   | EST: zk08f11.s1 Soares pregnant uterus       | 9456.523  |
| 12970 | RC_AA173972_at_GI_39725677-S   | EST: zp03d01.s1 Stratagene ovarian           | 9466.058  |
| 12971 | RC_AA292685_at_NA_illumina     | EST: zt21d11.s1 Soares ovary tumor           | 9466.542  |
| 12972 | RC_AA282750_s_at_NA_illumina   | EST: zs90h03.s1 NCI_CGAP_GCB1                | 9469.713  |
| 12973 | RC_AA427524_at_GI_19705425-S   | Zw33a10.s1 Soares ovary tumor NbHOT          | 9470.157  |
| 12974 | RC_AA232239_at_NA_illumina     | EST: zr75d08.s1 Soares NhHMPu S1             | 9473.089  |

|       |                               |                                          |          |
|-------|-------------------------------|------------------------------------------|----------|
| 12975 | AC002306_at_GI_44955913-S     | Endothelial differentiation,             | 9473.424 |
| 12976 | D29012_at_GI_23110924-S       | PSMB6 Proteasome (prosome,               | 9475.85  |
| 12977 | W36290_s_at_NA_illumina       | EST: HFBEST-67 Human fetal brain         | 9477.716 |
| 12978 | AA316186_at_NA_illumina       | EST: EST187902 HCC cell line             | 9481.783 |
| 12979 | N75236_s_at_NA_illumina       | EST: yz73f09.r1 Homo sapiens cDNA        | 9482.68  |
| 12980 | M28713_at_NA_illumina         | NADH-CYTOCHROME B5 REDUCTASE             | 9483.175 |
| 12981 | AA422160_at_NA_illumina       | Nucleosome assembly protein 1-like 1     | 9489.402 |
| 12982 | X66785_at_NA_illumina         | DBT Dihydrolipoamide branched chain      | 9491.989 |
| 12983 | R21443_at_NA_illumina         | Human pre-B cell enhancing factor (PBEF) | 9498.297 |
| 12984 | RC_AA477561_at_NA_illumina    | EST: zu41f11.s1 Soares ovary tumor       | 9506.519 |
| 12985 | RC_AA496038_at_GI_21362082-S  | EST: zv72d09.s1 Soares total fetus       | 9507.18  |
| 12986 | AA261884_at_NA_illumina       | Homo sapiens mRNA for KIAA0788           | 9512.849 |
| 12987 | D45333_at_GI_21536448-S       | Prefoldin 1                              | 9515.203 |
| 12988 | T31881_at_GI_7661825-A        | EST: EST40420 Homo sapiens cDNA 5'       | 9522.727 |
| 12989 | Z83821_cds2_at_GI_4557298-S   | 5-aminolevulinic acid synthase gene      | 9523.879 |
| 12990 | AA482319_f_at_GI_42476304-S   | EST: ab15c03.r1 Stratagene lung          | 9524.256 |
| 12991 | W27603_at_NA_illumina         | 35a7 Human retina cDNA randomly          | 9532.256 |
| 12992 | RC_AA252602_at_NA_illumina    | EST: zs14a10.s1 NCI_CGAP_GCB1            | 9541.158 |
| 12993 | RC_AA425378_r_at_NA_illumina  | Homo sapiens mRNA containing (CAG)4      | 9541.504 |
| 12994 | RC_AA424025_at_NA_illumina    | Sperm surface protein                    | 9547.768 |
| 12995 | W52581_at_NA_illumina         | EST: zc91g02.r1 Pancreatic Islet Homo    | 9548.578 |
| 12996 | AA151005_at_GI_27436921-A     | Sperm surface protein                    | 9554.453 |
| 12997 | RC_AA486868_s_at_GI_4759145-S | Slit (Drosophila) homolog 2              | 9557.62  |
| 12998 | RC_AA479704_at_NA_illumina    | Human DNA sequence from clone 283E3      | 9558.774 |
| 12999 | Y09836_at_GI_14165455-A       | 3'UTR of unknown protein                 | 9566.415 |
| 13000 | AA233245_at_NA_illumina       | EST: zr69e04.r1 Soares NhHMPu S1         | 9567.806 |
| 13001 | RC_AA251845_at_NA_illumina    | EST: zs09e08.s1 NCI_CGAP_GCB1            | 9569.284 |
| 13002 | M82809_at_GI_4809272-S        | ANX4 Annexin IV (placental anticoagulant | 9570.302 |
| 13003 | AB000460_at_GI_42476060-S     | mRNA, clone RES4-22A                     | 9576.86  |
| 13004 | HG1155-HT4822_at_NA_illumina  | Colony-Stimulating Factor 1, Macrophage, | 9581.903 |
| 13005 | X62055_at_GI_34328901-A       | PTPN6 Protein tyrosine phosphatase, non- | 9585.627 |
| 13006 | RC_AA132366_at_GI_31543651-S  | EST: zo28d09.s1 Stratagene colon         | 9599.438 |
| 13007 | X99920_at_GI_41117409-S       | S100 calcium-binding protein A13         | 9599.952 |
| 13008 | L25085_at_GI_14591932-S       | PROTEIN TRANSPORT PROTEIN SEC61          | 9602.807 |
| 13009 | RC_AA130273_at_GI_18497285-S  | EST: zo19e10.s1 Stratagene colon         | 9602.841 |
| 13010 | RC_AA456630_s_at_GI_41327768- | Homo sapiens mRNA for KIAA0521           | 9604.339 |
| 13011 | RC_AA482620_at_GI_37620170-S  | EST: zt34h11.s1 Soares ovary tumor       | 9606.098 |
| 13012 | RC_AA047187_at_GI_7657300-S   | EST: zk74a07.s1 Soares pregnant uterus   | 9607.03  |
| 13013 | D56433_s_at_NA_illumina       | EST: Human fetal brain cDNA 5'-end GEN-  | 9614.136 |
| 13014 | M22960_at_GI_4505988-S        | PPGB Protective protein for beta-        | 9616.716 |
| 13015 | RC_AA430738_at_NA_illumina    | EST: zw32c02.s1 Soares ovary tumor       | 9621.568 |
| 13016 | U09587_at_NA_illumina         | GARS Glycyl-tRNA synthetase              | 9622.822 |
| 13017 | U16306_at_GI_21361115-S       | CSPG2 Chondroitin sulfate proteoglycan 2 | 9623.818 |

|       |                                |                                              |          |
|-------|--------------------------------|----------------------------------------------|----------|
| 13018 | RC_AA404427_at_NA_illumina     | EST: zw37e12.s1 Soares total fetus           | 9634.125 |
| 13019 | RC_AA278717_at_GI_33946318-A   | EST: zs77e04.s1 NCI_CGAP_GCB1                | 9640.713 |
| 13020 | H84451_at_GI_21359901-S        | Homo sapiens mRNA for hypothetical           | 9643.22  |
| 13021 | RC_AA412028_s_at_NA_illumina   | Homo sapiens mRNA for Fe65L2,                | 9644.459 |
| 13022 | RC_AA600357_at_NA_illumina     | TIA1 cytotoxic granule-associated RNA-       | 9649.461 |
| 13023 | C02053_at_GI_4758773-S         | EST: HUMGS0005644, Human Gene                | 9653.479 |
| 13024 | M76732_s_at_GI_4505266-S       | HOX7 gene, exon 2 and complete cds           | 9655.567 |
| 13025 | RC_AA487558_at_NA_illumina     | EST: ab23e01.s1 Stratagene lung              | 9659.324 |
| 13026 | X71874_cds1_at_GI_23110923-S   | Proteasome-like subunit MECL-1 gene          | 9659.602 |
| 13027 | RC_AA412700_at_GI_38157980-A   | Ubiquitin-conjugating enzyme E2L 6           | 9664.732 |
| 13028 | R57419_s_at_NA_illumina        | EST: F3059 Fetal heart Homo sapiens          | 9670.443 |
| 13029 | RC_AA609017_s_at_NA_illumina   | Forkhead (Drosophila) homolog 1              | 9675.765 |
| 13030 | RC_AA293096_at_NA_illumina     | EST: zt55b05.s1 Soares ovary tumor           | 9677.107 |
| 13031 | RC_AA253364_s_at_NA_illumina   | EST: zr77a07.s1 Soares NhHMPu S1             | 9678.156 |
| 13032 | M92642_at_GI_18641351-S        | COL16A1 Alpha-1 type XVI collagen            | 9678.846 |
| 13033 | D87258_at_NA_illumina          | Cancellous bone osteoblast mRNA for          | 9679.417 |
| 13034 | Y00281_at_GI_32189383-S        | RPN1 Ribophorin I                            | 9681.105 |
| 13035 | J02854_at_GI_31563523-A        | 20-kDa myosin light chain (MLC-2) mRNA       | 9681.57  |
| 13036 | U82938_at_GI_11277469-A        | Human CD27BP (Siva) mRNA, complete           | 9682.1   |
| 13037 | T50262_at_NA_illumina          | Human ribosomal protein L35 mRNA,            | 9684.135 |
| 13038 | RC_AA447971_at_NA_illumina     | EST: zw82e01.s1 Soares testis NHT            | 9688.031 |
| 13039 | RC_AA131410_at_NA_illumina     | EST: zl32e03.s1 Soares pregnant uterus       | 9694.929 |
| 13040 | RC_AA261954_at_GI_40254975-S   | EST: zs23e06.s1 NCI_CGAP_GCB1                | 9695.088 |
| 13041 | U05237_at-2_NA_illumina        | Fetal Alzheimer antigen                      | 9700.413 |
| 13042 | U05237_at_GI_38788259-A        | Fetal Alz-50-reactive clone 1 (FAC1)         | 9700.413 |
| 13043 | AA076498_at_GI_40255011-S      | Homo sapiens clone 24775 mRNA                | 9704.452 |
| 13044 | R54743_at_GI_6006019-S         | EST: yj75a07.r1 Homo sapiens cDNA            | 9711.907 |
| 13045 | AF000424_s_at_GI_45505160-I    | LST1 mRNA, cLST1/E splice variant            | 9719.394 |
| 13046 | AA031548_at_GI_16357471-A      | Cell division cycle 42 (GTP-binding protein, | 9720.409 |
| 13047 | HG3033-HT3194_r_at_NA_illumina | Spliceosomal Protein Sap 62                  | 9723.643 |
| 13048 | U65785_at_GI_13699861-S        | 150 kDa oxygen-regulated protein             | 9729.129 |
| 13049 | AA448409_at_NA_illumina        | EST: zw68e09.r1 Soares testis NHT Homo       | 9730.736 |
| 13050 | AA283620_at_GI_10863996-S      | EST: zt23f11.r1 Soares ovary tumor           | 9739.077 |
| 13051 | X95735_at_GI_34147631-S        | Zyxin                                        | 9742.024 |
| 13052 | RC_AA621185_at_NA_illumina     | EST: zu81a03.s1 Soares testis NHT Homo       | 9749.272 |
| 13053 | RC_AA156097_s_at_GI_32455240-  | EST: zo45d03.s1 Stratagene endothelial       | 9750.139 |
| 13054 | AA495865_at_NA_illumina        | EST: zw05c07.r1 Soares NhHMPu S1             | 9756.182 |
| 13055 | RC_AA599677_at_NA_illumina     | Homo sapiens mRNA for KIAA0549               | 9757.207 |
| 13056 | AB002374_at_GI_37563738-S      | Human mRNA for KIAA0376 gene, partial        | 9766.57  |
| 13057 | N75238_s_at_GI_23943879-S      | EST: yz73f12.r1 Homo sapiens cDNA            | 9772.347 |
| 13058 | H29075_at_NA_illumina          | EST: ym31b04.r1 Homo sapiens cDNA            | 9772.762 |
| 13059 | AA259021_s_at_GI_5174576-S     | EST: zs33b03.r1 NCI_CGAP_GCB1 Homo           | 9772.782 |
| 13060 | RC_AA481414_at_NA_illumina     | Golgi SNAP receptor complex member 1         | 9772.949 |



|       |                                |                                             |           |
|-------|--------------------------------|---------------------------------------------|-----------|
| 13061 | AA405278_at_NA_illumina        | EST: zu12b06.r1 Soares testis NHT Homo      | 9774.983  |
| 13062 | W27176_s_at_GI_41393567-S      | EST: 23c2 Human retina cDNA randomly        | 9780.169  |
| 13063 | X07438_s_at_NA_illumina        | DNA for cellular retinol binding protein    | 9781.853  |
| 13064 | M15395_at_GI_4557885-S         | SELL Leukocyte adhesion protein beta        | 9782.309  |
| 13065 | X81006_at_NA_illumina          | H.sapiens HCG I mRNA                        | 9782.385  |
| 13066 | RC_AA461098_s_at_NA_illumina   | EST: zx63g01.s1 Soares total fetus          | 9790.481  |
| 13067 | U33821_at_GI_21361681-S        | Tax1-binding protein TXBP151 mRNA           | 9790.833  |
| 13068 | RC_AA121121_at_NA_illumina     | EST: zl88c03.s1 Stratagene colon            | 9793.553  |
| 13069 | M11313_s_at_GI_6226959-S       | A2M Alpha-2-macroglobulin                   | 9793.764  |
| 13070 | U06863_at-2_NA_illumina        | Human follistatin-related protein precursor | 9796.262  |
| 13071 | U06863_at_GI_34304366-S        | Follistatin-related protein precursor mRNA  | 9796.262  |
| 13072 | AA504095_at_GI_4759211-S       | Tubulin-specific chaperone a                | 9802.907  |
| 13073 | RC_AA598407_at_NA_illumina     | EST: ae48a12.s1 Stratagene lung             | 9803.796  |
| 13074 | N56191_at_GI_14589926-S        | Homo sapiens protocadherin 68 (PCH68)       | 9810.951  |
| 13075 | X80200_at_GI_22027623-A        | MLN62 mRNA                                  | 9815.454  |
| 13076 | RC_AA227960_at_GI_22749426-S   | EST: zr56d10.s1 Soares NhHMPu S1            | 9831.766  |
| 13077 | RC_AA441821_at_GI_32698701-S   | Leptin receptor                             | 9835.267  |
| 13078 | RC_AA255438_at_NA_illumina     | EST: zr83f03.s1 Soares NhHMPu S1            | 9839.7295 |
| 13079 | L10373_at_NA_illumina          | MXS1 Membrane component, X                  | 9840.372  |
| 13080 | AFFX-                          | AFFX-HUMISGF3A/M97935_MB_at                 | 9840.919  |
| 13081 | AFFX-HUMISGF3A/M97935_MB_at-   | No info for gene                            | 9840.919  |
| 13082 | X04011_at-2_NA_illumina        | Cytochrome b-245, beta polypeptide          | 9845.965  |
| 13083 | X04011_at_GI_6996020-S         | CYBB Chronic granulomatous disease          | 9845.965  |
| 13084 | RC_AA452108_at_NA_illumina     | Transcription factor AP-2 alpha (activating | 9850.002  |
| 13085 | AA484982_at_NA_illumina        | EST: aa39b02.r1 NCI_CGAP_GCB1               | 9857.132  |
| 13086 | RC_AA433899_at_GI_14249477-S   | EST: zw52b06.s1 Soares total fetus          | 9857.865  |
| 13087 | HG1728-HT1734_s_at_NA_illumina | Non-Specific Cross Reacting Antigen         | 9857.949  |
| 13088 | N99174_at_NA_illumina          | EST: yy67b02.r1 Homo sapiens cDNA           | 9861.828  |
| 13089 | RC_AA460270_at_NA_illumina     | Midline 1 (Opitz/BBB syndrome)              | 9861.864  |
| 13090 | RC_AA452282_at_NA_illumina     | EST: zx29h03.s1 Soares total fetus          | 9862.796  |
| 13091 | RC_AA426653_at_NA_illumina     | EST: zv47h02.s1 Soares ovary tumor          | 9881.802  |
| 13092 | RC_AA425943_at_GI_12965190-S   | Acyl-Coenzyme A dehydrogenase, very         | 9882.009  |
| 13093 | U20998_at_GI_4507216-S         | SRP9 Signal recognition particle 9 kD       | 9885.689  |
| 13094 | U90878_at_GI_20127594-S        | LIM domain protein CLP-36 mRNA              | 9892.78   |
| 13095 | RC_AA620289_at_NA_illumina     | Homo sapiens clone 23887 mRNA               | 9906.03   |
| 13096 | X52979_rna1_s_at_NA_illumina   | SmB protein gene extracted from Human       | 9909.425  |
| 13097 | D55051_i_at_NA_illumina        | Ribosomal protein S26                       | 9912.363  |
| 13098 | H14210_s_at_NA_illumina        | EST: ym62e11.r1 Homo sapiens cDNA           | 9912.401  |
| 13099 | X15187_at_GI_4507676-S         | TRA1 Homologue of mouse tumor               | 9912.951  |
| 13100 | RC_AA057842_at_GI_37542189-S   | EST: zl95e03.s1 Stratagene corneal          | 9914.19   |
| 13101 | RC_AA489012_at_NA_illumina     | Human pre-B cell enhancing factor (PBEF)    | 9921.878  |
| 13102 | M84371_rna1_s_at_GI_32481214-S | CD19 gene                                   | 9928.964  |
| 13103 | M84371_rna1_s_at-2_NA_illumina | CD19 antigen                                | 9928.964  |

|       |                                |                                         |           |
|-------|--------------------------------|-----------------------------------------|-----------|
| 13104 | AB000584_at_GI_4758935-S       | Prostate differentiation factor mRNA    | 9932.45   |
| 13105 | R71459_at_GI_32490571-S        | EST: yi51h05.r1 Homo sapiens cDNA       | 9935.3955 |
| 13106 | RC_AA205431_at_GI_21361907-S   | EST: zq66a10.s1 Stratagene              | 9938.904  |
| 13107 | RC_AA101723_s_at_NA_illumina   | EST: zk96e11.s1 Soares pregnant uterus  | 9942.654  |
| 13108 | RC_AA287643_at_GI_27477137-A   | EST: zs51e11.s1 NCI_CGAP_GCB1           | 9957.0205 |
| 13109 | AA039996_at_NA_illumina        | EST: zk45b07.r1 Soares pregnant uterus  | 9960.441  |
| 13110 | RC_D59894_at_NA_illumina       | EST: Human fetal brain cDNA 3'-end GEN- | 9961.688  |
| 13111 | L36151_at_GI_4505806-A         | PHOSPHATIDYLINOSITOL 4-KINASE           | 9967.724  |
| 13112 | RC_AA251776_at_NA_illumina     | Jun D proto-oncogene                    | 9981.297  |
| 13113 | RC_AA297783_at_NA_illumina     | EST: EST113333 Infant brain Homo        | 9984.154  |
| 13114 | AA042991_s_at_GI_38505264-S    | EST: zk56a01.r1 Soares pregnant uterus  | 9987.23   |
| 13115 | RC_AA256952_at_NA_illumina     | EST: zr81g08.s1 Soares NhHMPu S1        | 9987.744  |
| 13116 | RC_AA426261_at_NA_illumina     | EST: zw17a10.s1 Soares ovary tumor      | 9992.313  |
| 13117 | M23254_at_GI_12408645-S        | CAPN2 Calpain, large polypeptide L2     | 9998.016  |
| 13118 | RC_AA237011_at_GI_10947134-S   | ATP-binding cassette 50 (TNF-alpha      | 10000.442 |
| 13119 | AB002298_at_GI_30061508-A      | Human mRNA for KIAA0300 gene, partial   | 10001.737 |
| 13120 | RC_AA485358_at_NA_illumina     | Homo sapiens mRNA for putative seven    | 10003.521 |
| 13121 | N98666_at_GI_5729936-S         | Homo sapiens metaxin 2 (MTX2) mRNA,     | 10004.938 |
| 13122 | D13315_at_GI_5729841-S         | GLO1 Glyoxalase I                       | 10009.899 |
| 13123 | U75968_s_at_NA_illumina        | Human clone C3 CHL1 protein (CHLR1)     | 10019.348 |
| 13124 | D31544_s_at_GI_42476283-S      | EST: Human fetal-lung cDNA 5'-end       | 10021.279 |
| 13125 | RC_AA446864_at_GI_21361616-S   | EST: zw90a07.s1 Soares total fetus      | 10035.557 |
| 13126 | U95740_rna1_at-2_NA_illumina   | Human Chromosome 16 BAC clone           | 10047.899 |
| 13127 | U95740_rna1_at_GI_34878696-A   | 362G6.1 gene (unknown protein           | 10047.899 |
| 13128 | W26496_at_NA_illumina          | EST: 30d2 Human retina cDNA randomly    | 10048.644 |
| 13129 | RC_AA410467_at_NA_illumina     | EST: zv15g09.s1 Soares NhHMPu S1        | 10050.24  |
| 13130 | AA410480_at_NA_illumina        | EST: zv23b05.r1 Soares NhHMPu S1        | 10051.292 |
| 13131 | L09229_s_at_NA_illumina        | FACL1 Long chain fatty acid acyl-coA    | 10055.637 |
| 13132 | AA044781_at_NA_illumina        | EST: zk74b09.r1 Soares pregnant uterus  | 10055.667 |
| 13133 | RC_AA598921_at_GI_32967302-A   | EST: ae41d05.s1 Gessler Wilms tumor     | 10060.572 |
| 13134 | RC_AA456667_at_NA_illumina     | EST: aa01f07.s1 Soares NhHMPu S1        | 10063.808 |
| 13135 | AA496526_s_at_GI_45267838-S    | EST: zv36h01.r1 Soares ovary tumor      | 10064.419 |
| 13136 | AA377492_at_NA_illumina        | EST: EST90100 Synovial membrane         | 10066.713 |
| 13137 | R70976_at_NA_illumina          | EST: yi50c01.r1 Homo sapiens cDNA       | 10067.445 |
| 13138 | RC_AA403102_at_NA_illumina     | H.sapiens mRNA for ZNF185 gene          | 10072.722 |
| 13139 | RC_AA417872_at_NA_illumina     | EST: zv05e10.s1 Soares NhHMPu S1        | 10074.236 |
| 13140 | RC_AA062915_at_NA_illumina     | Endothelin converting enzyme 1          | 10075.105 |
| 13141 | M22538_at_GI_10835024-S        | NDUFV2 NADH dehydrogenase               | 10075.715 |
| 13142 | D00596_at_GI_4507750-S         | TYMS Thymidylate synthase               | 10078.038 |
| 13143 | RC_AA435664_at_NA_illumina     | EST: zt75a11.s1 Soares testis NHT Homo  | 10081.091 |
| 13144 | AA089997_at_GI_30409981-S      | EST: chn2489.seq.F Fetal heart, Lambda  | 10082.952 |
| 13145 | RC_AA155633_at_NA_illumina     | Insulin-like growth factor 1 receptor   | 10084.211 |
| 13146 | HG3044-HT3742_s_at_NA_illumina | Fibronectin, Alt. Splice 1              | 10084.336 |

|       |                              |                                             |            |
|-------|------------------------------|---------------------------------------------|------------|
| 13147 | J04046_s_at_GI_4885108-S     | CALMODULIN                                  | 10088.518  |
| 13148 | RC_AA504147_s_at_NA_illumina | EST: aa59e07.s1 NCI_CGAP_GCB1               | 10091.794  |
| 13149 | RC_AA253220_at_GI_42660574-S | EST: zr53g12.s1 Soares NhHMPu S1            | 10093.573  |
| 13150 | AA027795_at_NA_illumina      | EST: HPLA_CCLEE_17d6r HPLA CCLee            | 10103.612  |
| 13151 | RC_AA181096_at_GI_7706600-A  | EST: zp67b07.s1 Stratagene endothelial      | 10109.955  |
| 13152 | U37546_s_at_GI_33946284-A    | IAP homolog C (MIHC) mRNA                   | 10110.45   |
| 13153 | U37546_s_at-2_NA_illumina    | Apoptosis inhibitor 1                       | 10110.45   |
| 13154 | M54994_f_at_NA_illumina      | Carboxyl ester lipase (bile salt-stimulated | 10114.195  |
| 13155 | RC_AA488978_at_NA_illumina   | EST: aa54a08.s1 NCI_CGAP_GCB1               | 10119.334  |
| 13156 | RC_AA236034_at_NA_illumina   | EST: zr50f04.s1 Soares NhHMPu S1            | 10120.282  |
| 13157 | D16469_at_GI_37577154-S      | ORF, Xq terminal portion                    | 10122.462  |
| 13158 | M94891_s_at_NA_illumina      | Pregnancy specific beta-1-glycoprotein 4    | 10126.507  |
| 13159 | AA151795_s_at_NA_illumina    | Homo sapiens signal peptidase complex       | 10132.395  |
| 13160 | RC_AA136611_at_NA_illumina   | EST: zk99b02.s1 Soares pregnant uterus      | 10148.925  |
| 13161 | D31446_at_GI_11038645-S      | Breakpoint cluster region protein, uterine  | 10149.243  |
| 13162 | D31890_at_GI_5031814-S       | KIAA0070 gene, partial cds                  | 10154.578  |
| 13163 | RC_AA620520_at_NA_illumina   | EST: ae60e10.s1 Stratagene lung             | 10155.153  |
| 13164 | RC_AA423808_at_GI_45446742-S | Homo sapiens RNA helicase-related           | 10160.244  |
| 13165 | M63959_at_GI_4505020-S       | LRPAP1 Low density lipoprotein-related      | 10171.993  |
| 13166 | U50648_s_at_NA_illumina      | Interferon-inducible RNA-dependent          | 10177.48   |
| 13167 | RC_AA412119_at_NA_illumina   | EST: zt69c07.s1 Soares testis NHT Homo      | 10178.952  |
| 13168 | RC_AA084317_at_GI_32261293-S | Protein activator of the interferon-induced | 10181.144  |
| 13169 | RC_AA040174_at_NA_illumina   | Homo sapiens putative 13 S Golgi            | 10182.53   |
| 13170 | RC_AA234831_at_NA_illumina   | EST: zs38b04.s1 Soares NhHMPu S1            | 10183.912  |
| 13171 | M19267_s_at_GI_34222222-S    | TPM1 Tropomyosin alpha chain (skeletal      | 10187.573  |
| 13172 | RC_AA452855_at_NA_illumina   | Human mannose-specific lectin (MR60)        | 10188.8    |
| 13173 | D31134_at_GI_38787956-A      | EST: Human fetal-lung cDNA 5'-end           | 10192.514  |
| 13174 | AA094752_at_NA_illumina      | Protein phosphatase 3 (formerly 2B),        | 10192.966  |
| 13175 | RC_AA236401_at_GI_7656978-S  | EST: zr54g05.s1 Soares NhHMPu S1            | 10195.341  |
| 13176 | M97796_s_at_NA_illumina      | ID2 Inhibitor of DNA binding 2, dominant    | 10196.283  |
| 13177 | AA148094_at_GI_34147574-S    | Homo sapiens CC3 (CC3) mRNA,                | 10206.71   |
| 13178 | D79819_at_NA_illumina        | EST: Human aorta cDNA 5'-end GEN-           | 10208.15   |
| 13179 | RC_D59367_at_NA_illumina     | EST: Human fetal brain cDNA 3'-end GEN-     | 10209.996  |
| 13180 | RC_AA224205_at_GI_20127419-S | EST: zr15f03.s1 Stratagene NT2 neuronal     | 10216.759  |
| 13181 | D85815_at-2_NA_illumina      | Homo sapiens DNA for rhoHP1, complete       | 10218.663  |
| 13182 | D85815_at_NA_illumina        | DNA for rhoHP1                              | 10218.663  |
| 13183 | M13690_s_at_GI_4557378-S     | C1NH Complement component 1 inhibitor       | 10219.384  |
| 13184 | RC_AA487161_at_GI_16753206-S | Homo sapiens HRIHFB2157 mRNA,               | 10219.517  |
| 13185 | D42123_at_GI_31542322-S      | ESP1/CRP2                                   | 10224.27   |
| 13186 | S72043_rna1_at_NA_illumina   | GIF=growth inhibitory factor [human, brain, | 10227.96   |
| 13187 | RC_AA278329_f_at_NA_illumina | EST: zs80f03.s1 NCI_CGAP_GCB1 Homo          | 10228.28   |
| 13188 | RC_AA463946_at_GI_40254847-S | Pigment epithelium-derived factor           | 10228.659  |
| 13189 | RC_AA252630_at_GI_4507612-S  | Tankyrase, TRF1-interacting ankyrin-        | 10234.6045 |

|       |                               |                                            |           |
|-------|-------------------------------|--------------------------------------------|-----------|
| 13190 | RC_AA045263_at_GI_38261972-S  | EST: zf11g11.s1 Soares fetal heart         | 10235.013 |
| 13191 | W26116_s_at_NA_illumina       | Human DNA sequence from clone 149A16       | 10238.505 |
| 13192 | AA092348_at_NA_illumina       | Eukaryotic translation elongation factor 1 | 10241.447 |
| 13193 | C01541_at_GI_6912715-S        | EST: HUMGS0008537, Human Gene              | 10245.319 |
| 13194 | RC_AA043360_at_NA_illumina    | EST: zk62e11.s1 Soares pregnant uterus     | 10252.497 |
| 13195 | RC_AA599211_at_NA_illumina    | Short-chain dehydrogenase/reductase 1      | 10257.731 |
| 13196 | RC_AA598718_at_NA_illumina    | EST: ae49e04.s1 Stratagene lung            | 10271.828 |
| 13197 | N36432_at_NA_illumina         | EST: yx83a05.r1 Homo sapiens cDNA          | 10272.004 |
| 13198 | RC_AA449974_at_NA_illumina    | EST: zx38d04.s1 Soares total fetus         | 10274.455 |
| 13199 | RC_AA045545_at_GI_13435378-S  | EST: zk78g05.s1 Soares pregnant uterus     | 10275.758 |
| 13200 | RC_AA284720_at_GI_12232394-S  | EST: zt24a08.s1 Soares ovary tumor         | 10279.433 |
| 13201 | R32993_s_at_GI_24496788-S     | EST: yh73f12.r1 Homo sapiens cDNA          | 10283.236 |
| 13202 | AF004709_at_GI_20986527-S     | Protein kinase mitogen- activated 13       | 10287.154 |
| 13203 | RC_AA262261_at_GI_34147607-S  | EST: zs25e01.s1 NCI_CGAP_GCB1              | 10291.133 |
| 13204 | HG1112-HT1112_at_NA_illumina  | Ras-Like Protein Tc4                       | 10293.418 |
| 13205 | RC_AA151572_at_NA_illumina    | EST: zl28a04.s1 Soares pregnant uterus     | 10293.62  |
| 13206 | M13755_at_GI_4826773-S        | G1P2 Interferon, alpha-inducible protein   | 10293.781 |
| 13207 | RC_AA421284_at_GI_7662227-S   | Homo sapiens clone 23619                   | 10296.75  |
| 13208 | RC_AA424063_at_GI_6912273-S   | EST: zv80e08.s1 Soares total fetus         | 10302.074 |
| 13209 | S72503_s_at_GI_4826797-A      | HRK1                                       | 10302.979 |
| 13210 | RC_AA236365_s_at_NA_illumina  | Homo sapiens 3-phosphoglycerate            | 10308.385 |
| 13211 | RC_AA157799_at_GI_41327763-S  | Aldo-keto reductase family 7, member A2    | 10308.463 |
| 13212 | W55861_at_NA_illumina         | EST: zc03d12.r1 Soares parathyroid tumor   | 10309.119 |
| 13213 | RC_AA125861_at_GI_41152103-S  | Homo sapiens clone 24742 mRNA              | 10310.74  |
| 13214 | RC_AA236150_at_GI_33695118-S  | 3-prime-phosphoadenosine 5-prime-          | 10317.376 |
| 13215 | RC_AA252628_at_GI_45505172-A  | KIAA0598 gene product                      | 10317.579 |
| 13216 | J03069_rna1_at_NA_illumina    | MYCL2 gene                                 | 10320.433 |
| 13217 | H26326_f_at_NA_illumina       | Ribosomal protein S20                      | 10321.551 |
| 13218 | RC_AA278672_at_NA_illumina    | Homo sapiens mRNA for Fln29, complete      | 10327.627 |
| 13219 | HG4036-HT4306_at_NA_illumina  | Retinoblastoma 1                           | 10328.291 |
| 13220 | RC_AA410304_at_NA_illumina    | EST: zv23b12.s1 Soares NhHMPu S1           | 10329.988 |
| 13221 | RC_C13977_at_GI_24432041-S    | EST: Human fetal brain cDNA 3'-end GEN-    | 10330.969 |
| 13222 | L07807_s_at_GI_4758181-S      | DNM1 Dynamin 1                             | 10331.8   |
| 13223 | M59465_at_GI_26051241-S       | TNFAIP1 Tumor necrosis factor alpha        | 10333.987 |
| 13224 | AA210846_at_GI_40807484-S     | Homo sapiens mRNA, complete cds,           | 10349.597 |
| 13225 | RC_AA443272_at_GI_12383063-S  | EST: zw87e10.s1 Soares total fetus         | 10349.669 |
| 13226 | RC_AA448808_at_NA_illumina    | FK506-binding protein 2 (13kD)             | 10357.332 |
| 13227 | U83239_s_at_NA_illumina       | CC chemokine STCP-1 mRNA                   | 10363.142 |
| 13228 | RC_AA424961_s_at_NA_illumina  | Homo sapiens TEB4 protein mRNA,            | 10364.418 |
| 13229 | RC_AA459960_s_at_NA_illumina  | EST: zx66c02.s1 Soares total fetus         | 10368.681 |
| 13230 | RC_AA416797_s_at_NA_illumina  | EST: zu09h04.s1 Soares testis NHT Homo     | 10373.447 |
| 13231 | RC_AA406125_s_at_GI_37546339- | EST: zu65b07.s1 Soares testis NHT Homo     | 10375.365 |
| 13232 | X57766_at_GI_13027795-S       | PSG11 Pregnancy-specific beta-1            | 10376.244 |

|       |                               |                                          |            |
|-------|-------------------------------|------------------------------------------|------------|
| 13233 | M63573_at_GI_44890060-S       | PPIB Peptidylprolyl isomerase B          | 10390.191  |
| 13234 | H01766_s_at_NA_illumina       | Homo sapiens mRNA for KIAA0829           | 10401.535  |
| 13235 | AA094107_at_GI_41144256-S     | EST: cl1862.seq.F Fetal heart, Lambda    | 10401.621  |
| 13236 | RC_AA416726_s_at_GI_13129117- | EST: zu08a08.s1 Soares testis NHT Homo   | 10402.368  |
| 13237 | RC_AA460659_at_GI_19923809-S  | EST: zx64b12.s1 Soares total fetus       | 10409.203  |
| 13238 | M63262_at-2_NA_illumina       | Arachidonate 5-lipoxygenase-activating   | 10409.3    |
| 13239 | M63262_at_GI_15718674-S       | 5-lipoxygenase activating protein (FLAP) | 10409.3    |
| 13240 | RC_AA421148_at_GI_12232402-S  | Solute carrier family 5 (sodium/glucose  | 10416.459  |
| 13241 | J03805_s_at_GI_4758951-S      | Phosphatase 2A mRNA, partial cds         | 10420.948  |
| 13242 | RC_AA398257_at_NA_illumina    | 7-dehydrocholesterol reductase           | 10423.588  |
| 13243 | RC_AA025887_at_GI_42656266-S  | EST: ze86h12.s1 Soares fetal heart       | 10428.566  |
| 13244 | D78151_at_GI_25777601-S       | 55.11 binding protein                    | 10437.456  |
| 13245 | C16002_at_GI_7657503-S        | H. sapiens cDNA similar to C. elegans    | 10437.542  |
| 13246 | RC_AA243443_at_GI_4506562-S   | RNA guanylyltransferase and 5'           | 10440.697  |
| 13247 | U21931_at_GI_16579887-S       | FBP1 Fructose-bisphosphatase 1           | 10441.115  |
| 13248 | RC_AA128902_at_NA_illumina    | EST: zn90a05.s1 Stratagene lung          | 10449.65   |
| 13249 | U46192_at_NA_illumina         | Human renal cell carcinoma antigen RAGE- | 10452.152  |
| 13250 | RC_AA047864_at_NA_illumina    | EST: zf50a03.s1 Soares retina N2b4HR     | 10463.02   |
| 13251 | D17530_s_at_NA_illumina       | Drebrin 1                                | 10470.549  |
| 13252 | AA297912_at_NA_illumina       | EST: EST113641 T-cell lymphoma Homo      | 10472.722  |
| 13253 | L40392_at_NA_illumina         | (clone S164) mRNA, 3' end of cds         | 10474.001  |
| 13254 | L40392_at-2_NA_illumina       | Homo sapiens (clone S164) mRNA, 3' end   | 10474.001  |
| 13255 | RC_AA436646_at_NA_illumina    | EST: zv57b03.s1 Soares testis NHT Homo   | 10478.587  |
| 13256 | T81665_s_at_GI_24308078-S     | EST: yd29c01.r1 Homo sapiens cDNA        | 10480.303  |
| 13257 | HG3039-HT3200_at_NA_illumina  | Adp-Ribosylation-Like Factor             | 10489.045  |
| 13258 | RC_AA465355_at_GI_31543556-S  | U3 snoRNP-associated 55-kDa protein      | 10496.904  |
| 13259 | X05196_at_GI_4885062-S        | Aldolase C gene                          | 10497.934  |
| 13260 | RC_AA236715_at_GI_20070329-S  | EST: zt29c10.s1 Soares ovary tumor       | 10502.613  |
| 13261 | X80199_at_GI_24475733-S       | MLN51 mRNA                               | 10504.465  |
| 13262 | RC_AA599501_at_NA_illumina    | Plakophilin 4                            | 10510.597  |
| 13263 | RC_AA101632_at_NA_illumina    | EST: zk94c11.s1 Soares pregnant uterus   | 10511.421  |
| 13264 | AA410617_s_at_NA_illumina     | EST: zt29h04.r1 Soares ovary tumor       | 10513.6045 |
| 13265 | U62317_rna3_at_NA_illumina    | Choline kinase isolog 384D8_3 gene       | 10521.826  |
| 13266 | W42818_at_GI_13569955-S       | EST: zc24d03.r1 Soares senescent         | 10522.316  |
| 13267 | U32576_rna1_at_GI_4502160-S   | Apolipoprotein apoC-IV (APOC4) gene      | 10523.702  |
| 13268 | U32576_rna1_at-2_NA_illumina  | Apolipoprotein C-IV                      | 10523.702  |
| 13269 | W57786_at_NA_illumina         | EST: zd21c05.r1 Soares fetal heart       | 10539.244  |
| 13270 | RC_AA253193_at_NA_illumina    | EST: zr52g02.s1 Soares NhHMPu S1         | 10544.215  |
| 13271 | AA292423_s_at_NA_illumina     | EST: zt51h12.r1 Soares ovary tumor       | 10548.999  |
| 13272 | AB002369_at_NA_illumina       | Myotubularin related protein 3           | 10552.529  |
| 13273 | RC_AA490182_at_GI_37541313-S  | EST: ab06e01.s1 Stratagene fetal retina  | 10552.784  |
| 13274 | RC_AA398200_at_NA_illumina    | Homo sapiens mRNA for KIAA0875           | 10554.306  |
| 13275 | RC_AA449456_at_NA_illumina    | EST: zx05e11.s1 Soares total fetus       | 10570.012  |

|       |                              |                                         |            |
|-------|------------------------------|-----------------------------------------|------------|
| 13276 | RC_AA598461_at_GI_19923926-S | EST: ae48h01.s1 Stratagene lung         | 10571.993  |
| 13277 | Z49099_at_GI_21264340-S      | Spermine synthase                       | 10578.291  |
| 13278 | D43642_at_NA_illumina        | YL-1 mRNA for YL-1 protein (nuclear     | 10588.596  |
| 13279 | AA092294_f_at_GI_7706179-S   | EST: ll6526.seq.F Fetal heart, Lambda   | 10592.587  |
| 13280 | RC_AA085918_at_GI_7657217-A  | H.sapiens HUNK1 mRNA                    | 10600.506  |
| 13281 | RC_AA290767_at_NA_illumina   | EST: zt23g07.s1 Soares ovary tumor      | 10600.836  |
| 13282 | X15306_rna1_at_GI_32483415-S | NF-H gene, exon 1 (and joined CDS)      | 10600.883  |
| 13283 | D31483_at_GI_20986517-S      | Homo sapiens clone 23565 unknown        | 10604.892  |
| 13284 | U51336_at_GI_41393564-S      | Inositol 1,3,4-trisphosphate 5/6-kinase | 10606.23   |
| 13285 | RC_AA181911_at_GI_41281590-S | EST: zp63e07.s1 Stratagene endothelial  | 10614.644  |
| 13286 | RC_AA461549_at_GI_30181243-A | Doublecortex; lissencephaly, X-linked   | 10615.353  |
| 13287 | RC_AA291528_at_GI_40805107-S | EST: zt37e08.s1 Soares ovary tumor      | 10618.393  |
| 13288 | AA206946_at_GI_34222118-S    | EST: zq83a05.r1 Stratagene hNT neuron   | 10620.284  |
| 13289 | H19063_at_NA_illumina        | EST: yn51b01.r1 Homo sapiens cDNA       | 10622.0625 |
| 13290 | Z32765_at_NA_illumina        | CD36 gene exon 15                       | 10623.184  |
| 13291 | RC_AA465226_at_NA_illumina   | EST: aa24f09.s1 NCI_CGAP_GCB1 Homo      | 10629.327  |
| 13292 | X77737_at_NA_illumina        | Red cell anion exchanger (EPB3, AE1,    | 10637.464  |
| 13293 | L40397_at_NA_illumina        | (clone S31i125) mRNA, 3' end of cds     | 10638.704  |
| 13294 | AA256220_at_NA_illumina      | EST: zr79b07.r1 Soares NhHMPu S1        | 10639.606  |
| 13295 | X69433_at_GI_28178831-S      | IDH2 Isocitrate dehydrogenase 2         | 10642.542  |
| 13296 | D86043_s_at_GI_18426910-S    | SHPS-1                                  | 10650.78   |
| 13297 | D86043_s_at-2_NA_illumina    | Protein tyrosine phosphatase, non-      | 10650.78   |
| 13298 | RC_AA521290_at_GI_24041034-S | EST: aa79e03.s1 NCI_CGAP_GCB1           | 10651.364  |
| 13299 | RC_AA236972_at_NA_illumina   | EST: zs43c07.s1 Soares NhHMPu S1        | 10653.998  |
| 13300 | RC_AA430074_at_NA_illumina   | EST: zw59c03.s1 Soares total fetus      | 10657.059  |
| 13301 | X74104_at_GI_6552341-S       | SSR2 Signal sequence receptor, beta     | 10657.811  |
| 13302 | M97815_at_GI_6382069-S       | CRABP2 Cellular retinoic acid-binding   | 10658.661  |
| 13303 | L20492_s_at_NA_illumina      | Gamma-glutamyltransferase 1             | 10659.411  |
| 13304 | H66074_at_NA_illumina        | H. sapiens cDNA similar to C. elegans   | 10659.634  |
| 13305 | RC_AA044078_at_GI_6912501-S  | EST: zk50d07.s1 Soares pregnant uterus  | 10673.262  |
| 13306 | W07248_at_NA_illumina        | Homo sapiens clone 23887 mRNA           | 10687.318  |
| 13307 | X56667_at_GI_6031161-A       | CALB2 Calbindin 2, (29kD, calretinin)   | 10698.518  |
| 13308 | RC_AA284082_at_NA_illumina   | EST: zs49b09.s1 NCI_CGAP_GCB1           | 10701.1045 |
| 13309 | U31930_at_GI_21361335-S      | DUT DUTP pyrophosphatase                | 10705.97   |
| 13310 | Z25821_rna1_s_at_NA_illumina | Dodecenoyl-Coenzyme A delta isomerase   | 10710.965  |
| 13311 | R95811_at_GI_32698772-S      | EST: yq50e03.r1 Homo sapiens cDNA       | 10715.682  |
| 13312 | RC_AA451852_at_NA_illumina   | EST: zx12f11.s1 Soares total fetus      | 10719.846  |
| 13313 | Z69881_at_GI_28373114-A      | Adenosine triphosphatase, calcium       | 10720.865  |
| 13314 | D14694_at_GI_7662646-S       | PHOSPHATIDYLSERINE SYNTHASE I           | 10721.654  |
| 13315 | RC_AA599138_at_GI_21717815-S | EST: ae52c11.s1 Stratagene lung         | 10740.589  |
| 13316 | RC_AA424129_at_GI_37564791-S | EST: zv81a02.s1 Soares total fetus      | 10742.987  |
| 13317 | RC_AA397916_f_at_NA_illumina | EST: zt58h08.s1 Soares testis NHT Homo  | 10752.22   |
| 13318 | RC_AA478387_at_GI_8923389-S  | EST: zu46a09.s1 Soares ovary tumor      | 10755.655  |

|       |                                |                                             |           |
|-------|--------------------------------|---------------------------------------------|-----------|
| 13319 | RC_AA425637_at_NA_illumina     | Homo sapiens mRNA, complete cds,            | 10756.152 |
| 13320 | RC_AA422047_at_NA_illumina     | EST: zv28e08.s1 Soares ovary tumor          | 10764.141 |
| 13321 | AA459166_s_at_GI_6912247-S     | EST: zx88e06.r1 Soares ovary tumor          | 10766.063 |
| 13322 | AA278412_at_NA_illumina        | EST: zs81h03.r1 NCI_CGAP_GCB1 Homo          | 10766.097 |
| 13323 | RC_AA189015_at_GI_13385593-S   | Homo sapiens mRNA for cytochrome b5,        | 10768.522 |
| 13324 | C00180_f_at_GI_4759061-A       | Synaptic glycoprotein SC2                   | 10768.7   |
| 13325 | RC_AA478960_at_NA_illumina     | EST: zv18d03.s1 Soares NhHMPu S1            | 10771.36  |
| 13326 | RC_AA481437_at_NA_illumina     | EST: zv45a02.s1 Soares ovary tumor          | 10771.769 |
| 13327 | R51954_at_NA_illumina          | EST: yj71g02.r1 Homo sapiens cDNA           | 10772.957 |
| 13328 | RC_AA283934_at_NA_illumina     | EST: zs47h12.s1 NCI_CGAP_GCB1               | 10773.172 |
| 13329 | RC_AA461473_at_NA_illumina     | Homo sapiens mRNA for nebullette            | 10776.574 |
| 13330 | X57152_rna1_s_at_GI_26787971-S | Casein kinase II subunit beta (EC 2.7.1.37) | 10778.774 |
| 13331 | M32315_at_GI_23312365-S        | TNFR2 Tumor necrosis factor receptor 2      | 10780.245 |
| 13332 | M32315_at-2_NA_illumina        | Tumor necrosis factor receptor              | 10780.245 |
| 13333 | M29696_at_GI_28610150-S        | IL7R Interleukin 7 receptor                 | 10782.721 |
| 13334 | RC_AA166810_at_GI_7661615-S    | EST: zo87a05.s1 Stratagene ovarian          | 10782.859 |
| 13335 | L26336_at_GI_13676856-S        | Heat shock protein HSPA2 gene               | 10783.46  |
| 13336 | L26336_at-2_NA_illumina        | Human heat shock protein HSPA2 gene,        | 10783.46  |
| 13337 | N98799_at_GI_23308690-S        | EST: yy69h03.r1 Homo sapiens cDNA           | 10789.052 |
| 13338 | Z49107_s_at_NA_illumina        | Galectin                                    | 10789.35  |
| 13339 | D83779_at_GI_41281472-S        | KIAA0195 gene                               | 10791.519 |
| 13340 | L76200_at_GI_34147566-S        | Guanylate kinase (GUK1) mRNA                | 10792.799 |
| 13341 | U65932_at_GI_12707571-A        | Extracellular matrix protein 1 (ECM1)       | 10796.203 |
| 13342 | RC_AA282481_at_NA_illumina     | EST: zs90c07.s1 NCI_CGAP_GCB1               | 10796.238 |
| 13343 | HG2815-HT2931_s_at_NA_illumina | Myosin, Light Chain, Alkali, Smooth         | 10797.151 |
| 13344 | RC_AA358038_at_GI_4506924-S    | SH3-binding domain glutamic acid-rich       | 10798.741 |
| 13345 | RC_AA127463_at_NA_illumina     | Human protein kinase inhibitor p58 mRNA,    | 10814.259 |
| 13346 | RC_AA126871_s_at_GI_21361618-  | EST: zl16b08.s1 Soares pregnant uterus      | 10816.957 |
| 13347 | RC_AA143763_at_NA_illumina     | EST: zo31d08.s1 Stratagene colon            | 10818.386 |
| 13348 | RC_AA348284_at_GI_31341688-S   | EST: EST54734 Hippocampus II Homo           | 10827.706 |
| 13349 | RC_AA234925_at_GI_40068511-S   | EST: zr78g10.s1 Soares NhHMPu S1            | 10827.782 |
| 13350 | AA452957_at_NA_illumina        | EST: zx36c01.r1 Soares total fetus          | 10831.051 |
| 13351 | RC_AA114858_at_GI_22095361-S   | EST: zl02c12.s1 Soares pregnant uterus      | 10835.664 |
| 13352 | M54927_at_GI_41349498-S        | PLP Proteolipid protein (Pelizaeus-         | 10841.589 |
| 13353 | RC_AA430481_at_NA_illumina     | EST: zw23e02.s1 Soares ovary tumor          | 10842.803 |
| 13354 | RC_AA402494_at_GI_4757859-S    | EST: zt65d05.s1 Soares testis NHT Homo      | 10845.234 |
| 13355 | Z83821_cds1_at_NA_illumina     | Keratin 8                                   | 10847.959 |
| 13356 | L25081_at_NA_illumina          | ARH9 Aplysia ras-related homolog 9          | 10857.209 |
| 13357 | RC_AA022884_at_GI_44889474-S   | EST: ze71c10.s1 Soares fetal heart          | 10859.401 |
| 13358 | RC_AA282405_at_NA_illumina     | EST: zs90e06.s1 NCI_CGAP_GCB1               | 10859.666 |
| 13359 | AA136100_at_GI_42476298-S      | EST: zn88c06.r1 Stratagene lung             | 10868.262 |
| 13360 | AA284403_at_GI_38524621-S      | Homo sapiens mRNA for KIAA0554              | 10870.184 |
| 13361 | W58540_at_NA_illumina          | Leptin receptor                             | 10879.643 |

|       |                              |                                            |           |
|-------|------------------------------|--------------------------------------------|-----------|
| 13362 | RC_AA398522_at_NA_illumina   | EST: zt47d11.s1 Soares ovary tumor         | 10883.693 |
| 13363 | AA096465_at_GI_28269680-S    | EST: I9866.seq.F Fetal heart, Lambda       | 10885.011 |
| 13364 | RC_AA347967_at_NA_illumina   | EST: EST54400 Fetal heart II Homo          | 10886.853 |
| 13365 | RC_AA026111_at_GI_34304325-S | EST: ze94c06.s1 Soares fetal heart         | 10888.191 |
| 13366 | RC_AA282118_at_NA_illumina   | EST: zt03h01.s1 NCI_CGAP_GCB1 Homo         | 10895.021 |
| 13367 | U11861_at_GI_32171174-S      | Edg-2                                      | 10895.471 |
| 13368 | U37146_at_NA_illumina        | Silencing mediator of retinoid and thyroid | 10895.882 |
| 13369 | RC_AA447189_at_GI_21361536-S | EST: zw91e01.s1 Soares total fetus         | 10908.027 |
| 13370 | RC_AA132746_at_GI_21361700-S | EST: zo21a03.s1 Stratagene colon           | 10909.43  |
| 13371 | U83236_s_at_NA_illumina      | Human DNA-PK interaction protein (KIP)     | 10918.841 |
| 13372 | RC_AA402224_at_GI_9790905-S  | Homo sapiens growth arrest and DNA-        | 10923.758 |
| 13373 | X99133_at_NA_illumina        | NGAL gene                                  | 10925.699 |
| 13374 | RC_AA426609_at_NA_illumina   | EST: zw02h08.s1 Soares NhHMPu S1           | 10934.025 |
| 13375 | RC_AA452113_at_NA_illumina   | EST: zx15b11.s1 Soares total fetus         | 10941.796 |
| 13376 | M69197_xpt2_s_at_NA_illumina | HPR from Human haptoglobin and             | 10943.307 |
| 13377 | X78817_at_GI_41327157-S      | KIAA0131 gene, partial cds                 | 10944.166 |
| 13378 | RC_AA236458_at_NA_illumina   | EST: zr75h02.s1 Soares NhHMPu S1           | 10955.936 |
| 13379 | U60975_at_GI_18379347-S      | Hybrid receptor gp250 precursor mRNA       | 10958.288 |
| 13380 | RC_AA280865_at_GI_8923807-S  | EST: zt01b06.s1 NCI_CGAP_GCB1 Homo         | 10960.339 |
| 13381 | RC_AA598444_at_NA_illumina   | Homo sapiens clone 486790                  | 10964.891 |
| 13382 | U66672_at_NA_illumina        | EST: Human clone EST90625 ATP-             | 10968.286 |
| 13383 | RC_AA279764_at_GI_19923563-S | EST: zs88a09.s1 NCI_CGAP_GCB1              | 10971.502 |
| 13384 | RC_AA427782_at_GI_31881739-S | EST: zw33h07.s1 Soares ovary tumor         | 10978.483 |
| 13385 | AA094999_at_NA_illumina      | Homo sapiens zinc finger protein 216       | 10982.214 |
| 13386 | RC_AA610114_at_GI_31543175-S | EST: af19g07.s1 Soares total fetus         | 10984.834 |
| 13387 | X17620_at_GI_38045911-A      | NME1 Non-metastatic cells 1, protein       | 11005.286 |
| 13388 | RC_AA133215_at_GI_5032018-S  | Homo sapiens mRNA encoding RAMP1           | 11005.662 |
| 13389 | D28118_at-2_NA_illumina      | Human mRNA for DB1, complete cds           | 11014.625 |
| 13390 | D28118_at_GI_6005967-S       | DB1                                        | 11014.625 |
| 13391 | RC_AA496045_s_at_NA_illumina | EST: zv72e04.s1 Soares total fetus         | 11015.294 |
| 13392 | RC_AA394002_at_NA_illumina   | EST: zt49e09.s1 Soares ovary tumor         | 11017.897 |
| 13393 | RC_AA251110_at_NA_illumina   | EST: zs03g05.s1 NCI_CGAP_GCB1              | 11020.151 |
| 13394 | AA436302_at_NA_illumina      | EST: zv22d07.r1 Soares NhHMPu S1           | 11024.739 |
| 13395 | D26600_at_GI_22538466-S      | PROTEASOME BETA CHAIN                      | 11026.543 |
| 13396 | Z68907_s_at_NA_illumina      | Isocitrate dehydrogenase 3 (NAD+)          | 11027.537 |
| 13397 | D88270_at_GI_18379350-S      | Immunoglobulin lambda gene locus DNA,      | 11034.034 |
| 13398 | D49676_s_at_NA_illumina      | U2 small nuclear ribonucleoprotein         | 11036.668 |
| 13399 | AA249819_s_at_GI_34013512-S  | EST: II1992.seq.F Human fetal heart,       | 11037.327 |
| 13400 | M93651_at_GI_4506890-S       | SET PROTEIN                                | 11040.359 |
| 13401 | N91087_at_NA_illumina        | EST: za18b11.r1 Soares fetal liver spleen  | 11041.874 |
| 13402 | D82505_at_NA_illumina        | EST: similar to none, mRNA sequence.       | 11049.861 |
| 13403 | S81914_at_GI_16554595-A      | IEX-1                                      | 11055.181 |
| 13404 | RC_AA599552_s_at_NA_illumina | EST: ag08a06.s1 Gessler Wilms tumor        | 11055.83  |



|       |                              |                                           |            |
|-------|------------------------------|-------------------------------------------|------------|
| 13405 | AA456985_at_NA_illumina      | Homo sapiens TTAGGG repeat binding        | 11057.532  |
| 13406 | RC_AA280810_at_GI_7661741-S  | EST: zs99b05.s1 NCI_CGAP_GCB1             | 11059.692  |
| 13407 | L25880_s_at_NA_illumina      | Epoxide hydrolase 1, microsomal           | 11068.388  |
| 13408 | H30754_at_GI_32307157-S      | EST: yo79a08.r1 Homo sapiens cDNA         | 11075.302  |
| 13409 | AA422025_s_at_NA_illumina    | EST: zv26f07.r1 Soares NhHMPu S1          | 11076.974  |
| 13410 | RC_AA287109_at_NA_illumina   | EST: zs59g01.s1 NCI_CGAP_GCB1             | 11078.391  |
| 13411 | J04152_ma1_s_at_GI_4505056-S | M1S1 gene extracted from Human            | 11083.019  |
| 13412 | AA459536_at_NA_illumina      | Procollagen-lysine, 2-oxoglutarate 5-     | 11085.015  |
| 13413 | L11066_at_GI_39812281-S      | MITOCHONDRIAL STRESS-70 PROTEIN           | 11087.033  |
| 13414 | RC_AA416567_at_NA_illumina   | EST: zu05c09.s1 Soares testis NHT Homo    | 11093.641  |
| 13415 | L10838_at_NA_illumina        | PRE-MRNA SPLICING FACTOR SRP20            | 11097.878  |
| 13416 | RC_AA456415_at_NA_illumina   | EST: zx34e09.s1 Soares total fetus        | 11098.509  |
| 13417 | AA337887_at_NA_illumina      | EST: EST42856 Endometrial tumor Homo      | 11115.919  |
| 13418 | RC_AA149940_at_NA_illumina   | GLUT1 C-terminal binding protein          | 11123.773  |
| 13419 | L36720_at_GI_15208644-S      | Bystin mRNA                               | 11126.286  |
| 13420 | L36720_at-2_NA_illumina      | Bystin-like                               | 11126.286  |
| 13421 | L12711_s_at_GI_4507520-S     | TKT Transketolase (Wernicke-Korsakoff     | 11133.298  |
| 13422 | RC_AA477729_at_GI_42490763-S | EST: zu44g09.s1 Soares ovary tumor        | 11138.747  |
| 13423 | RC_AA121543_at_GI_44771172-S | Homo sapiens mRNA for KIAA0758            | 11140.322  |
| 13424 | RC_AA443923_at_GI_29029551-A | EST: zv51a02.s1 Soares testis NHT Homo    | 11142.943  |
| 13425 | D17408_s_at_GI_34222150-S    | Calponin                                  | 11152.543  |
| 13426 | X05855_s_at_NA_illumina      | EEF1G Translation elongation factor 1     | 11154.722  |
| 13427 | RC_AA397779_at_NA_illumina   | EST: zt72d01.s1 Soares testis NHT Homo    | 11159.332  |
| 13428 | RC_AA621032_at_GI_45359844-S | KIAA0660 gene product                     | 11163.543  |
| 13429 | AA314466_at_GI_7305502-S     | Homo sapiens chromosome 9, P1 clone       | 11166.366  |
| 13430 | W25813_at_NA_illumina        | Heterogeneous nuclear ribonucleoprotein   | 11167.452  |
| 13431 | RC_AA476473_at_NA_illumina   | Homo sapiens Trio mRNA, complete cds      | 11175.507  |
| 13432 | M69245_s_at_NA_illumina      | Human pregnancy-specific beta-1           | 11175.554  |
| 13433 | AA292158_s_at_GI_21536375-S  | EST: zt46c03.r1 Soares ovary tumor        | 11177.946  |
| 13434 | U36221_at_GI_4504074-S       | Pancreatic zymogen granule membrane       | 11183.622  |
| 13435 | AA278547_at_NA_illumina      | EST: zs76c04.r1 NCI_CGAP_GCB1 Homo        | 11188.169  |
| 13436 | M21056_at_GI_38016927-S      | Lung phospholipase A-2 (PLA-2) mRNA,      | 11189.913  |
| 13437 | M21259_at_GI_4507128-S       | SNRPE Small nuclear ribonucleoprotein     | 11196.63   |
| 13438 | AA459189_s_at_GI_30089918-A  | EST: zx88g08.r1 Soares ovary tumor        | 11205.552  |
| 13439 | U29874_ma1_at_NA_illumina    | Fms-related tyrosine kinase 3             | 11208.063  |
| 13440 | J04794_at_GI_24497576-A      | ALCOHOL DEHYDROGENASE                     | 11217.987  |
| 13441 | T35341_s_at_GI_18491025-A    | EST: EST83074 Homo sapiens cDNA 5'        | 11219.5205 |
| 13442 | U94905_s_at_NA_illumina      | Diacylglycerol kinase, zeta (104kD)       | 11234.545  |
| 13443 | H49222_s_at_GI_13376368-S    | EST: yq19g03.r1 Soares fetal liver spleen | 11245.878  |
| 13444 | RC_AA236702_at_GI_32189381-S | EST: zt29b02.s1 Soares ovary tumor        | 11249.372  |
| 13445 | RC_AA452865_at_GI_13929463-A | UDP-Gal:betaGlcNAc beta 1,4-              | 11254.01   |
| 13446 | HG2566-HT4867_at_NA_illumina | Microtubule-Associated Protein Tau, Alt.  | 11259.225  |
| 13447 | L20773_at_NA_illumina        | mRNA in the region near the btk gene      | 11261.274  |

|       |                                |                                           |           |
|-------|--------------------------------|-------------------------------------------|-----------|
| 13448 | L20773_at-2_NA_illumina        | Homo sapiens mRNA in the region near      | 11261.274 |
| 13449 | M72885_rna1_s_at_GI_20070269-S | G0S2 gene extracted from Human GOS2       | 11280.351 |
| 13450 | AA256771_at_NA_illumina        | EST: zs22h09.r1 NCI_CGAP_GCB1 Homo        | 11283.259 |
| 13451 | RC_AA436568_at_NA_illumina     | EST: zv08g11.s1 Soares NhHMPu S1          | 11283.502 |
| 13452 | AA043111_s_at_GI_34147468-S    | EST: zk48b08.r1 Soares pregnant uterus    | 11292.069 |
| 13453 | AA460049_s_at_NA_illumina      | EST: zx66c01.r1 Soares total fetus        | 11292.402 |
| 13454 | RC_AA457129_at_GI_5730022-S    | EST: zx84e03.s1 Soares ovary tumor        | 11310.971 |
| 13455 | D83492_at_GI_4758291-S         | EphB6                                     | 11315.875 |
| 13456 | RC_AA476436_at_GI_18079320-S   | EST: zx02d05.s1 Soares total fetus        | 11316.342 |
| 13457 | RC_AA504332_at_NA_illumina     | EST: aa61e12.s1 NCI_CGAP_GCB1             | 11317.81  |
| 13458 | C01139_at_GI_11072092-I        | EST: HUMGS0007818, Human Gene             | 11318.856 |
| 13459 | RC_AA063581_at_GI_4505368-S    | NADH dehydrogenase (ubiquinone) Fe-S      | 11319.775 |
| 13460 | U15085_at_GI_18641376-S        | HLA-DMB Major histocompatibility          | 11326.953 |
| 13461 | RC_AA434103_at_NA_illumina     | EST: zw24a08.s1 Soares ovary tumor        | 11333.778 |
| 13462 | RC_AA287111_at_NA_illumina     | Cyclin G associated kinase                | 11337.983 |
| 13463 | H02533_at_NA_illumina          | EST: yj40f11.r1 Homo sapiens cDNA clone   | 11339.197 |
| 13464 | RC_AA449914_at_GI_21361562-S   | Homo sapiens mRNA for glycoprotein-       | 11342.986 |
| 13465 | U44975_at_NA_illumina          | DNA-binding protein CPBP (CPBP)           | 11343.857 |
| 13466 | Z19574_rna1_at_GI_4557700-S    | Cytokeratin 17                            | 11346.94  |
| 13467 | RC_AA234995_at_GI_42476103-A   | EST: zr50c05.s1 Soares NhHMPu S1          | 11350.878 |
| 13468 | X05130_s_at_NA_illumina        | P4HB Procollagen-proline, 2-oxoglutarate  | 11352.524 |
| 13469 | RC_AA126855_at_GI_8922527-S    | EST: zn88f12.s1 Stratagene lung           | 11356.131 |
| 13470 | S75463_at_GI_34147629-S        | ELONGATION FACTOR TU,                     | 11359.287 |
| 13471 | D26598_at_GI_22538464-S        | Proteasome subunit HsC10-II               | 11360.51  |
| 13472 | RC_AA206023_at_NA_illumina     | EST: zq77c12.s1 Stratagene hNT neuron     | 11362.296 |
| 13473 | AA094921_at_GI_31341196-S      | EST: cp2164.seq.F Fetal heart, Lambda     | 11363.033 |
| 13474 | T52609_s_at_NA_illumina        | SWI/SNF related, matrix associated, actin | 11365.717 |
| 13475 | RC_AA292086_s_at_NA_illumina   | EST: zt46f03.s1 Soares ovary tumor        | 11366.864 |
| 13476 | RC_AA426518_at_NA_illumina     | EST: zw11a09.s1 Soares NhHMPu S1          | 11378.826 |
| 13477 | RC_AA394114_at_NA_illumina     | EST: zt52b07.s1 Soares ovary tumor        | 11382.784 |
| 13478 | AB002344_at_NA_illumina        | Human mRNA for KIAA0346 gene, partial     | 11383.852 |
| 13479 | D21260_at_GI_41327727-S        | 60S RIBOSOMAL PROTEIN L23                 | 11387.96  |
| 13480 | RC_AA461495_at_NA_illumina     | EST: zx60a07.s1 Soares testis NHT Homo    | 11403.718 |
| 13481 | AA253330_s_at_NA_illumina      | EST: zr72g02.r1 Soares NhHMPu S1          | 11408.983 |
| 13482 | W38597_i_at_GI_32455261-A      | EST: zb20c11.r1 Soares fetal lung         | 11414.732 |
| 13483 | D00763_at_GI_23110940-S        | GAPD Glyceraldehyde-3-phosphate           | 11418.418 |
| 13484 | AA233423_s_at_GI_45433538-S    | Homo sapiens inner mitochondrial          | 11427.038 |
| 13485 | U40369_rna1_at_GI_4506788-S    | Spermidine/spermine N1-acetyltransferase  | 11427.131 |
| 13486 | RC_AA479910_at_GI_34594663-S   | EST: zw44c09.s1 Soares total fetus        | 11445.776 |
| 13487 | RC_AA182001_r_at_NA_illumina   | EST: zp62f10.s1 Stratagene endothelial    | 11452.402 |
| 13488 | AA429825_at_GI_16117795-A      | EST: zw57d04.r1 Soares total fetus        | 11455.782 |
| 13489 | RC_AA447732_at_NA_illumina     | Glutathione peroxidase 3 (plasma)         | 11466.392 |
| 13490 | H60501_at_GI_5174574-S         | EST: yr42g01.r1 Homo sapiens cDNA         | 11475.734 |

|       |                              |                                                   |            |
|-------|------------------------------|---------------------------------------------------|------------|
| 13491 | U81600_at_GI_38505203-S      | Paired-like homeodomain protein PRX-2             | 11475.925  |
| 13492 | U81600_at-2_NA_illumina      | Human paired-like homeodomain protein             | 11475.925  |
| 13493 | AA452353_i_at_NA_illumina    | Protein phosphatase 2 (formerly 2A),              | 11478.379  |
| 13494 | T39740_s_at_NA_illumina      | H.sapiens mRNA for serine                         | 11480.512  |
| 13495 | X60221_at_NA_illumina        | ATP5F1 ATP synthase, H <sup>+</sup> transporting, | 11480.935  |
| 13496 | U83171_at-2_NA_illumina      | Small inducible cytokine subfamily A (Cys-        | 11481.165  |
| 13497 | U83171_at_GI_22538803-S      | Macrophage-derived chemokine precursor            | 11481.165  |
| 13498 | AA458542_at_GI_40805821-S    | Homo sapiens mRNA for Epsilon COP                 | 11488.506  |
| 13499 | M26041_s_at_NA_illumina      | HLA-DQA1 MHC class II DQ alpha                    | 11492.138  |
| 13500 | D31313_s_at_NA_illumina      | EST: Human fetal-lung cDNA 5'-end                 | 11492.539  |
| 13501 | AA477018_s_at_NA_illumina    | EST: zu38a10.r1 Soares ovary tumor                | 11494.381  |
| 13502 | U62317_rna1_s_at_NA_illumina | Carnitine palmitoyltransferase I,                 | 11495.659  |
| 13503 | RC_AA481169_at_NA_illumina   | EST: aa34h11.s1 NCI_CGAP_GCB1                     | 11496.814  |
| 13504 | RC_D51166_f_at_NA_illumina   | Homo sapiens nuclear DEAF-1 related               | 11500.587  |
| 13505 | W27941_at_NA_illumina        | Homo sapiens clone 23631 mRNA                     | 11502.537  |
| 13506 | AA243393_at_GI_20070157-S    | STE20-like kinase 3                               | 11510.451  |
| 13507 | RC_AA027163_at_GI_31377757-S | EST: ze93e11.s1 Soares fetal heart                | 11513.1875 |
| 13508 | U58516_at_NA_illumina        | Breast epithelial antigen BA46 mRNA               | 11514.197  |
| 13509 | RC_AA457242_at_GI_6631103-S  | Etoposide-induced mRNA                            | 11514.462  |
| 13510 | M57731_s_at_GI_4504154-S     | GRO2 GRO2 oncogene                                | 11517.802  |
| 13511 | S75256_s_at_GI_38455401-S    | HNL=neutrophil lipocalin [human, ovarian          | 11526.593  |
| 13512 | S82198_at_GI_11321627-S      | Caldecrin                                         | 11533.557  |
| 13513 | C16574_at_GI_14141188-S      | Homo sapiens heterogeneous nuclear                | 11536.8125 |
| 13514 | RC_AA449312_at_NA_illumina   | Homo sapiens mRNA for KIAA0826                    | 11539.255  |
| 13515 | AA316272_at_GI_42794751-S    | Fatty-acid-Coenzyme A ligase, long-chain          | 11541.985  |
| 13516 | J03544_s_at_NA_illumina      | Phosphorylase, glycogen; brain                    | 11549.25   |
| 13517 | W75980_at_NA_illumina        | KIAA0214 gene product                             | 11556.51   |
| 13518 | N46577_at_GI_25121991-A      | EST: yy48b04.r1 Homo sapiens cDNA                 | 11556.825  |
| 13519 | D85429_at_GI_5453689-S       | DNAJ PROTEIN HOMOLOG 1                            | 11567.684  |
| 13520 | AA059405_at_GI_33946290-S    | Homo sapiens clone 24655 mRNA                     | 11575.416  |
| 13521 | RC_AA401965_at_NA_illumina   | Homo sapiens growth suppressor related            | 11584.41   |
| 13522 | RC_AA430108_at_NA_illumina   | EST: zw61a11.s1 Soares total fetus                | 11585.052  |
| 13523 | RC_AA620556_at_GI_45643118-A | Homo sapiens DBI-related protein mRNA,            | 11594.391  |
| 13524 | M88468_at_GI_4557768-S       | MVK Mevalonate kinase                             | 11623.57   |
| 13525 | RC_AA194998_at_NA_illumina   | Homo sapiens purinergic receptor P2Y5             | 11629.687  |
| 13526 | AA095473_at_NA_illumina      | Ubiquitin-conjugating enzyme E2H                  | 11629.859  |
| 13527 | RC_AA232187_at_GI_13376700-S | EST: zr25c10.s1 Stratagene NT2 neuronal           | 11630      |
| 13528 | RC_AA599016_at_GI_17978497-S | Cyclin-dependent kinase inhibitor 1B (p27,        | 11647.358  |
| 13529 | M12959_s_at_NA_illumina      | TCRA T cell receptor alpha-chain                  | 11654.024  |
| 13530 | U14394_at_NA_illumina        | METALLOPROTEINASE INHIBITOR 3                     | 11654.915  |
| 13531 | RC_AA599876_s_at_NA_illumina | EST: ag32e02.s1 Jia bone marrow stroma            | 11667.346  |
| 13532 | AA436216_s_at_NA_illumina    | EST: zv23g10.r1 Soares NhHMPu S1                  | 11669.543  |
| 13533 | D53639_at_NA_illumina        | Ribosomal protein S26                             | 11672.121  |

|       |                              |                                                                     |           |
|-------|------------------------------|---------------------------------------------------------------------|-----------|
| 13534 | HG3494-HT3688_at_NA_illumina | Nuclear Factor Nf-Il6                                               | 11677.733 |
| 13535 | RC_AA416947_at_NA_illumina   | EST: zt94c04.s1 Soares testis NHT Homo                              | 11693.977 |
| 13536 | U60115_at_GI_34147646-S      | Skeletal muscle LIM-protein SLIM1 mRNA                              | 11696.09  |
| 13537 | X89109_s_at_GI_5902133-S     | MacMarcks mRNA                                                      | 11699.41  |
| 13538 | RC_AA430149_at_NA_illumina   | EST: zw59h03.s1 Soares total fetus                                  | 11699.715 |
| 13539 | RC_AA405832_at_NA_illumina   | EST: zu57g11.s1 Soares ovary tumor                                  | 11707.797 |
| 13540 | M21005_at_GI_21614543-S      | CALGRANULIN A                                                       | 11715.657 |
| 13541 | RC_AA608962_at_NA_illumina   | H.sapiens gene from PAC 102G20                                      | 11716.525 |
| 13542 | T69384_at_GI_4505712-S       | Period (Drosophila) homolog                                         | 11719.598 |
| 13543 | RC_AA452280_s_at_NA_illumina | EST: zx29g12.s1 Soares total fetus                                  | 11737.232 |
| 13544 | RC_AA446451_at_NA_illumina   | EST: zw65a08.s1 Soares testis NHT                                   | 11747.651 |
| 13545 | RC_AA291162_at_NA_illumina   | EST: zs46d07.s1 NCI_CGAP_GCB1                                       | 11753.046 |
| 13546 | RC_AA442125_at_GI_7705854-S  | KIAA0331 gene product                                               | 11753.091 |
| 13547 | T30444_at_NA_illumina        | Homo sapiens mRNA for GCP170,                                       | 11756.256 |
| 13548 | M37457_at_GI_34303927-S      | Na <sup>+</sup> ,K <sup>+</sup> -ATPase catalytic subunit alpha-III | 11763.534 |
| 13549 | RC_AA448008_at_GI_40018630-A | GUANINE NUCLEOTIDE-BINDING                                          | 11767.739 |
| 13550 | D81925_at_GI_14110406-A      | Heterogeneous nuclear ribonucleoprotein                             | 11776.167 |
| 13551 | W78211_s_at_GI_33519464-S    | EST: zd68e06.r1 Soares fetal heart                                  | 11782.192 |
| 13552 | M20902_at_GI_5174774-S       | APOC1 Apolipoprotein CI                                             | 11783.083 |
| 13553 | AB002357_at_GI_31742486-S    | Kinesin family protein 3B                                           | 11791.302 |
| 13554 | AA496105_at_GI_24234719-A    | MRJ gene for a member of the DNAJ                                   | 11798.409 |
| 13555 | AA406435_at_NA_illumina      | EST: zv12d12.r1 Soares NhHMPu S1                                    | 11798.902 |
| 13556 | RC_AA280004_at_NA_illumina   | Homolog of mouse quaking QKI (KH                                    | 11803.081 |
| 13557 | M58459_at_NA_illumina        | RPS4Y Ribosomal protein S4, Y-linked                                | 11804.673 |
| 13558 | RC_AA053888_at_GI_19923414-S | EST: ze75b08.s1 Soares fetal heart                                  | 11806.64  |
| 13559 | RC_AA460916_at_NA_illumina   | EST: zx61a12.s1 Soares total fetus                                  | 11808.603 |
| 13560 | RC_AA284753_at_NA_illumina   | EST: zt21g11.s1 Soares ovary tumor                                  | 11810.1   |
| 13561 | RC_AA151674_at_NA_illumina   | Carbonic anhydrase XII                                              | 11815.553 |
| 13562 | RC_AA053139_at_NA_illumina   | EST: zl73e05.s1 Stratagene colon                                    | 11820.343 |
| 13563 | W92836_at_NA_illumina        | EST: zd92g04.r1 Soares fetal heart                                  | 11825.375 |
| 13564 | RC_AA489478_f_at_NA_illumina | Ribosomal protein L33-like                                          | 11834.741 |
| 13565 | AA482319_i_at_NA_illumina    | EST: ab15c03.r1 Stratagene lung                                     | 11842.256 |
| 13566 | RC_AA404421_at_GI_23312363-A | EST: zw37e05.s1 Soares total fetus                                  | 11842.457 |
| 13567 | U31875_at_2_NA_illumina      | Human Hep27 protein mRNA, complete                                  | 11843.182 |
| 13568 | U31875_at_GI_40548398-A      | Hep27 protein mRNA                                                  | 11843.182 |
| 13569 | W95793_at_NA_illumina        | EST: ze07h05.r1 Soares fetal heart                                  | 11851.357 |
| 13570 | R50692_at_GI_7662151-S       | KIAA0476 gene product                                               | 11861.286 |
| 13571 | X59766_at_GI_38372939-S      | AZGP1 Zinc-alpha-2-glycoprotein 1                                   | 11881.909 |
| 13572 | RC_AA620307_at_NA_illumina   | EST: af05g12.s1 Soares testis NHT Homo                              | 11882.072 |
| 13573 | N90820_at_GI_35493781-A      | EST: yz88h08.r1 Soares multiple sclerosis                           | 11895.758 |
| 13574 | RC_AA040759_s_at_NA_illumina | NADH dehydrogenase (ubiquinone) 1 beta                              | 11897.684 |
| 13575 | RC_AA227926_at_GI_18141306-S | EST: zr56a07.s1 Soares NhHMPu S1                                    | 11897.794 |
| 13576 | C14412_s_at_NA_illumina      | EST: Human fetal brain cDNA 5'-end GEN-                             | 11898.826 |

|       |                              |                                            |            |
|-------|------------------------------|--------------------------------------------|------------|
| 13577 | R39394_at_NA_illumina        | Homo sapiens mRNA for E1B-55kDa-           | 11904.231  |
| 13578 | M30703_s_at_GI_22035683-S    | Amphiregulin (AR) gene                     | 11905.956  |
| 13579 | RC_AA419609_at_GI_41152073-I | EST: zv04b06.s1 Soares NhHMPu S1           | 11909.33   |
| 13580 | RC_AA460541_at_GI_21536251-S | EST: zx68e09.s1 Soares total fetus         | 11912.467  |
| 13581 | T89815_at_NA_illumina        | EST: ye11d01.r1 Homo sapiens cDNA          | 11916.876  |
| 13582 | R12974_at_NA_illumina        | EST: yf70c09.r1 Homo sapiens cDNA          | 11923.267  |
| 13583 | AA037316_at_NA_illumina      | EST: zc52h08.r1 Soares senescent           | 11933.523  |
| 13584 | RC_AA454536_s_at_NA_illumina | Eukaryotic translation elongation factor 1 | 11934.614  |
| 13585 | M16364_s_at_GI_34335231-S    | CKB Creatine kinase B                      | 11948.304  |
| 13586 | RC_AA001409_i_at_NA_illumina | EST: ze45d02.s1 Soares retina N2b4HR       | 11949.407  |
| 13587 | RC_AA406163_at_GI_27477119-S | FSHD region gene 1                         | 11949.8545 |
| 13588 | AA456687_at_GI_30840979-S    | EST: aa13e06.r1 Soares NhHMPu S1           | 11953.583  |
| 13589 | AA157401_at_GI_21361646-S    | Homo sapiens clone 23931 mRNA, partial     | 11961.608  |
| 13590 | AA471384_at_GI_7706243-S     | Homo sapiens DNA sequence from             | 11962.805  |
| 13591 | U90545_at_GI_5730046-S       | Human sodium phosphate transporter         | 11969.998  |
| 13592 | J02902_at_GI_32455242-S      | PROTEIN PHOSPHATASE PP2A, 65 KD            | 11975.3545 |
| 13593 | AA486946_at_GI_21956644-S    | EST: ab17d06.r1 Stratagene lung            | 11975.585  |
| 13594 | U35048_at_NA_illumina        | TSC-22 protein mRNA                        | 11987.963  |
| 13595 | RC_AA424865_at_NA_illumina   | Novel centrosomal protein RanBPM           | 11994.199  |
| 13596 | W27301_at_NA_illumina        | EST: 27b5 Human retina cDNA randomly       | 12001.777  |
| 13597 | U30825_at_GI_38016912-S      | Splicing factor SRp30c mRNA                | 12019.972  |
| 13598 | RC_AA195656_at_NA_illumina   | EST: zr33f05.s1 Soares NhHMPu S1           | 12020.704  |
| 13599 | M10942_at_GI_31581520-S      | Metallothionein-le gene (hMT-le)           | 12022.462  |
| 13600 | RC_AA608802_at_GI_11038653-S | EST: af04e03.s1 Soares testis NHT Homo     | 12040.816  |
| 13601 | H58435_at_NA_illumina        | EST: yr25d12.r1 Homo sapiens cDNA          | 12060.484  |
| 13602 | AB002351_at_GI_24586683-A    | Human mRNA for KIAA0353 gene, partial      | 12061.359  |
| 13603 | RC_AA448253_at_GI_42659549-S | EST: zw83e05.s1 Soares testis NHT          | 12063.958  |
| 13604 | D88422_at_GI_20357561-S      | CYSTATIN A                                 | 12064.234  |
| 13605 | RC_AA459916_at_GI_13376724-S | Bradykinin receptor B2                     | 12065.015  |
| 13606 | H49440_at_GI_32130513-A      | Cold shock domain protein A                | 12078.602  |
| 13607 | AB002367_at_GI_42544237-S    | Doublecortin and CaM kinase-like 1         | 12086.688  |
| 13608 | AF002246_at_GI_27894375-S    | Homo sapiens neural cell adhesion          | 12100.711  |
| 13609 | RC_AA074090_at_NA_illumina   | EST: zm75f02.s1 Stratagene                 | 12101.696  |
| 13610 | RC_AA394140_at_NA_illumina   | EST: zt49e08.s1 Soares ovary tumor         | 12105.238  |
| 13611 | X57346_at_GI_31742480-A      | YWHAB Tyrosine 3-                          | 12113.576  |
| 13612 | W01367_s_at_NA_illumina      | EST: yy66g10.r1 Soares multiple sclerosis  | 12125.973  |
| 13613 | AA281546_at_NA_illumina      | EST: zt08h08.r1 NCI_CGAP_GCB1 Homo         | 12130.947  |
| 13614 | AA307748_s_at_NA_illumina    | EST: EST17861 Aorta endothelial cells,     | 12131.587  |
| 13615 | RC_AA451836_at_NA_illumina   | EST: zx12e02.s1 Soares total fetus         | 12139.078  |
| 13616 | X05978_at_NA_illumina        | Cystatin A (stefin A)                      | 12140.404  |
| 13617 | RC_AA400259_at_GI_41053624-S | EST: zu63a07.s1 Soares testis NHT Homo     | 12143.912  |
| 13618 | HG110-HT110_s_at_NA_illumina | Heterogeneous Nuclear Ribonucleoprotein    | 12144.39   |
| 13619 | D79206_s_at_GI_38201674-S    | SDC4 Syndecan 4 (amphiglycan,              | 12155.172  |

|       |                                |                                          |           |
|-------|--------------------------------|------------------------------------------|-----------|
| 13620 | X15882_at_NA_illumina          | COL6A2 Collagen, type VI, alpha 2        | 12155.257 |
| 13621 | C00463_at_GI_13129105-S        | EST: HUMGS0007162, Human Gene            | 12156.309 |
| 13622 | RC_AA205460_at_GI_32699053-S   | EST: zq66f07.s1 Stratagene               | 12165.135 |
| 13623 | RC_AA417068_s_at_NA_illumina   | EST: zu13b04.s1 Soares testis NHT Homo   | 12182.119 |
| 13624 | Y13622_at_GI_4505036-S         | Latent transforming growth factor beta   | 12192.143 |
| 13625 | Y00264_at_GI_41406053-S        | APP Amyloid A4 protein of Alzheimer's    | 12200.228 |
| 13626 | RC_AA054228_at_GI_40254966-S   | EST: zf52f04.s1 Soares retina N2b4HR     | 12203.303 |
| 13627 | RC_AA286852_at_GI_30425545-S   | EST: zs55g05.s1 NCI_CGAP_GCB1            | 12210.847 |
| 13628 | RC_AA232252_at_NA_illumina     | Homo sapiens mRNA for hypothetical       | 12211.371 |
| 13629 | R86859_at_NA_illumina          | EST: ym86a02.r1 Homo sapiens cDNA        | 12222.892 |
| 13630 | U32944_at_GI_4505812-S         | Cytoplasmic dynein light chain 1 (hdlc1) | 12226.849 |
| 13631 | M22430_at_GI_20149501-S        | PLA2G2A Phospholipase A2, group IIA      | 12230.297 |
| 13632 | RC_AA126719_at_NA_illumina     | EST: zk95b03.s1 Soares pregnant uterus   | 12244.477 |
| 13633 | RC_AA457235_at_NA_illumina     | EST: aa91c07.s1 Stratagene fetal retina  | 12250.56  |
| 13634 | J02923_at_GI_7382490-S         | LCP1 Lymphocyte cytosolic protein 1 (L-  | 12253.574 |
| 13635 | RC_AA046405_at_NA_illumina     | EST: zk70b09.s1 Soares pregnant uterus   | 12253.825 |
| 13636 | D45288_at_NA_illumina          | EST: Human brain cDNA, mRNA              | 12259.918 |
| 13637 | X68314_at_GI_32967606-S        | GPX2 Glutathione peroxidase 2,           | 12264.28  |
| 13638 | M86667_at_GI_21327706-A        | HnRNP C2 protein mRNA                    | 12266.508 |
| 13639 | RC_AA410311_at_NA_illumina     | EST: zv23c07.s1 Soares NhHMPu S1         | 12266.693 |
| 13640 | RC_AA357189_at_GI_39812034-S   | EST: EST65883 Jurkat T-cells I Homo      | 12268.313 |
| 13641 | D11086_at_GI_4557881-S         | IL2RG Interleukin 2 receptor gamma chain | 12278.903 |
| 13642 | AA091605_at_GI_22091459-S      | Sparc/osteonectin, cwcv and kazal-like   | 12279.036 |
| 13643 | RC_AA400999_at_GI_21359891-S   | EST: zu50f10.s1 Soares ovary tumor       | 12284.635 |
| 13644 | RC_AA461303_at_NA_illumina     | EST: zx65a11.s1 Soares total fetus       | 12292.267 |
| 13645 | RC_AA287274_at_NA_illumina     | EST: zs52b02.s1 NCI_CGAP_GCB1            | 12295.238 |
| 13646 | RC_AA259147_at_NA_illumina     | EST: zs30f01.s1 NCI_CGAP_GCB1 Homo       | 12300.079 |
| 13647 | U22055_at_GI_7657430-S         | 100 kDa coactivator mRNA                 | 12301.537 |
| 13648 | RC_AA282140_at_GI_41204979-S   | EST: zt02b01.s1 NCI_CGAP_GCB1 Homo       | 12303.1   |
| 13649 | J03242_s_at_GI_6453816-S       | IGF2 Insulin-like growth factor 2        | 12326.256 |
| 13650 | HG3355-HT3532_at_NA_illumina   | Peroxisome Proliferator Activated        | 12327.56  |
| 13651 | M94630_at_GI_14110413-A        | Heterogeneous nuclear ribonucleoprotein  | 12333.02  |
| 13652 | RC_AA459974_at_NA_illumina     | EST: zx66d06.s1 Soares total fetus       | 12340.577 |
| 13653 | RC_AA464188_s_at_GI_21536395-  | EST: zx83g04.s1 Soares ovary tumor       | 12364.517 |
| 13654 | RC_AA486735_at_GI_18765743-S   | EST: ab18h06.s1 Stratagene lung          | 12372.279 |
| 13655 | HG3431-HT3616_s_at_NA_illumina | Decorin, Alt. Splice 1                   | 12373.262 |
| 13656 | X01630_at_GI_16950634-A        | ASS Argininosuccinate synthetase         | 12376.739 |
| 13657 | RC_AA453795_at_NA_illumina     | EST: aa19f08.s1 Soares NhHMPu S1         | 12379.826 |
| 13658 | Z50781_at_NA_illumina          | Leucine zipper protein                   | 12388.7   |
| 13659 | RC_AA449267_at_GI_23238233-A   | EST: zx04f03.s1 Soares total fetus       | 12403.701 |
| 13660 | RC_AA287681_s_at_NA_illumina   | EST: zs53f07.s1 NCI_CGAP_GCB1 Homo       | 12408.015 |
| 13661 | RC_AA421638_at_NA_illumina     | EST: zu28h04.s1 Soares ovary tumor       | 12411.858 |
| 13662 | RC_AA432292_at_GI_13540611-S   | EST: zw69e03.s1 Soares testis NHT        | 12411.969 |

|       |                              |                                           |            |
|-------|------------------------------|-------------------------------------------|------------|
| 13663 | X73358_s_at_NA_illumina      | HAES-1 mRNA                               | 12414.139  |
| 13664 | RC_AA253043_at_NA_illumina   | EST: zr52b12.s1 Soares NhHMPu S1          | 12417.604  |
| 13665 | RC_AA258308_at_NA_illumina   | EST: zr60g11.s1 Soares NhHMPu S1          | 12421.761  |
| 13666 | AA303166_at_NA_illumina      | EST: EST13228 Thymus tumor I Homo         | 12422.288  |
| 13667 | RC_AA459287_at_NA_illumina   | Myosin IXB                                | 12435.388  |
| 13668 | RC_AA040263_at_GI_8923711-S  | EST: zf05d03.s1 Soares fetal heart        | 12448.603  |
| 13669 | AA236441_at_GI_7669552-S     | Homo sapiens chromosome 9, P1 clone       | 12448.613  |
| 13670 | AA430258_at_GI_29570778-A    | H.sapiens NuMA gene (Clone T33)           | 12455.856  |
| 13671 | L21954_at_GI_21536443-A      | PERIPHERAL-TYPE BENZODIAZEPINE            | 12463.066  |
| 13672 | U83246_at_GI_23397697-A      | Copine I mRNA                             | 12470.837  |
| 13673 | AA252381_at_NA_illumina      | KH-type splicing regulatory protein       | 12479.028  |
| 13674 | RC_AA043448_at_NA_illumina   | EST: zk54a10.s1 Soares pregnant uterus    | 12481.605  |
| 13675 | RC_AA227956_at_GI_5031700-S  | Homo sapiens follistatin-related protein  | 12483.385  |
| 13676 | RC_AA485381_at_GI_41393569-S | EST: zx90d09.s1 Soares ovary tumor        | 12490.593  |
| 13677 | RC_AA227541_at_NA_illumina   | Homo sapiens mRNA for KIAA0850            | 12494.6045 |
| 13678 | W44681_at_GI_18490994-A      | Zc29g11.r1 Soares senescent fibroblasts   | 12496.369  |
| 13679 | Y00764_at_GI_5174744-S       | ARH9 Aplysia ras-related homolog 9        | 12506.3    |
| 13680 | C00424_s_at_GI_34147585-S    | EST: HUMGS0005632, Human Gene             | 12507.337  |
| 13681 | U46570_at_GI_4507710-S       | Tetratricopeptide repeat protein (tpr1)   | 12507.642  |
| 13682 | Y08915_at-2_NA_illumina      | Immunoglobulin (CD79A) binding protein 1  | 12523.112  |
| 13683 | Y08915_at_GI_4557662-S       | Alpha 4 protein                           | 12523.112  |
| 13684 | RC_AA598710_at_GI_21314680-S | EST: ae49d04.s1 Stratagene lung           | 12528.213  |
| 13685 | AA463311_at_GI_30749197-A    | EST: zx71d12.r1 Soares total fetus        | 12537.07   |
| 13686 | RC_AA435769_s_at_NA_illumina | EST: zt79h07.s1 Soares testis NHT Homo    | 12540.352  |
| 13687 | RC_AA600012_at_NA_illumina   | EST: ag29h10.s1 Jia bone marrow stroma    | 12557.307  |
| 13688 | RC_AA449700_at_NA_illumina   | EST: zx07d06.s1 Soares total fetus        | 12570.319  |
| 13689 | RC_AA402685_at_NA_illumina   | EST: zu49g09.s1 Soares ovary tumor        | 12581.739  |
| 13690 | X62744_at_GI_18765714-S      | CLASS II HISTOCOMPATIBILITY               | 12585.212  |
| 13691 | W69302_at_GI_37693994-S      | EST: zd46e07.r1 Soares fetal heart        | 12590.223  |
| 13692 | M77349_at_GI_4507466-S       | Transforming growth factor-beta induced   | 12593.364  |
| 13693 | AA278441_at_NA_illumina      | EST: zs81d12.r1 NCI_CGAP_GCB1 Homo        | 12595.706  |
| 13694 | RC_AA453289_at_NA_illumina   | H.sapiens mRNA for ZYG homologue          | 12596.28   |
| 13695 | RC_AA411465_at_GI_31077201-S | EST: zv30g06.s1 Soares ovary tumor        | 12599.978  |
| 13696 | RC_AA417568_s_at_NA_illumina | EST: zv04e05.s1 Soares NhHMPu S1          | 12603.018  |
| 13697 | RC_AA262511_at_NA_illumina   | Homo sapiens COX4AL mRNA, complete        | 12611.751  |
| 13698 | D23662_at_GI_5453759-S       | UBL1 Ubiquitin-like protein               | 12616.9375 |
| 13699 | X04085_rna1_at_GI_4557013-S  | Catalase (EC 1.11.1.6) 5'flank and exon 1 | 12619.078  |
| 13700 | RC_AA599978_s_at_NA_illumina | EST: ag28g07.s1 Jia bone marrow stroma    | 12635.981  |
| 13701 | C01721_at_NA_illumina        | Homo sapiens PNG pseudogene,              | 12639.618  |
| 13702 | RC_AA478971_s_at_NA_illumina | Disabled (Drosophila) homolog 2 (mitogen- | 12655.941  |
| 13703 | RC_AA459855_at_NA_illumina   | EST: zx51g08.s1 Soares testis NHT Homo    | 12659.335  |
| 13704 | AF006088_at_GI_23238212-S    | Arp2/3 protein complex subunit p16        | 12663.457  |
| 13705 | RC_AA182658_at_NA_illumina   | Homo sapiens clone 23930 mRNA             | 12667.579  |

|       |                               |                                              |           |
|-------|-------------------------------|----------------------------------------------|-----------|
| 13706 | U78521_at_GI_4502008-S        | Immunophilin homolog ARA9 mRNA               | 12667.584 |
| 13707 | RC_AA489074_at_GI_10047103-S  | EST: aa54g11.s1 NCI_CGAP_GCB1                | 12673.144 |
| 13708 | RC_AA435636_f_at_NA_illumina  | P21 (CDKN1A)-activated kinase 2              | 12675.294 |
| 13709 | M30838_at_GI_38888174-S       | PULMONARY SURFACTANT-                        | 12680.492 |
| 13710 | W81268_at_NA_illumina         | Eukaryotic translation initiation factor 2,  | 12681.316 |
| 13711 | D81655_at_GI_37542884-S       | EST: Human fetal brain cDNA 5'-end GEN-      | 12685.781 |
| 13712 | AB002305_at_GI_41281514-S     | KIAA0307 gene product                        | 12689.926 |
| 13713 | RC_AA609977_at_GI_4557446-S   | EST: af09h02.s1 Soares testis NHT Homo       | 12698.629 |
| 13714 | U38846_at_GI_38455426-S       | Stimulator of TAR RNA binding (SRB)          | 12726.467 |
| 13715 | X74795_at_GI_23510447-S       | CDC46 HOMOLOG                                | 12730.167 |
| 13716 | L02326_f_at_NA_illumina       | (clone Hu lambda-17) lambda-like gene        | 12730.455 |
| 13717 | AA046840_at_NA_illumina       | CCAAT/enhancer binding protein (C/EBP),      | 12737.087 |
| 13718 | RC_AA434395_at_NA_illumina    | EST: zw31a12.s1 Soares ovary tumor           | 12741.046 |
| 13719 | RC_AA226922_at_NA_illumina    | EST: zr21b01.s1 Stratagene NT2 neuronal      | 12748.712 |
| 13720 | RC_AA044601_at_NA_illumina    | EST: zk55d05.s1 Soares pregnant uterus       | 12751.299 |
| 13721 | RC_AA075311_f_at_NA_illumina  | EST: zm84h01.s1 Stratagene ovarian           | 12755.058 |
| 13722 | RC_AA496366_at_NA_illumina    | EST: zv37c09.s1 Soares ovary tumor           | 12755.778 |
| 13723 | AA452082_at_GI_21359964-S     | EST: zx16g04.r1 Soares total fetus           | 12755.928 |
| 13724 | AA430011_at_NA_illumina       | Radixin                                      | 12771.841 |
| 13725 | HG2855-HT2995_at_NA_illumina  | Heat Shock Protein, 70 Kda (Gb:Y00371)       | 12775.828 |
| 13726 | RC_AA425872_at_GI_4826849-S   | EST: zv47c07.s1 Soares ovary tumor           | 12777.126 |
| 13727 | RC_AA237009_at_GI_9966826-S   | EST: zr99b08.s1 NCI_CGAP_GCB1 Homo           | 12779.164 |
| 13728 | X15414_at_NA_illumina         | ALDR1 Aldehyde reductase 1 (low Km           | 12802.649 |
| 13729 | RC_AA146619_at_GI_8923562-S   | EST: zo71b06.s1 Stratagene pancreas          | 12818.681 |
| 13730 | AA096491_at_NA_illumina       | EST: k0190.seq.F Fetal heart, Lambda         | 12820.088 |
| 13731 | X64072_s_at_NA_illumina       | SELL Leukocyte adhesion protein beta         | 12821.207 |
| 13732 | AA308998_at_GI_24475997-S     | Endothelial differentiation-related factor 1 | 12833.197 |
| 13733 | W72943_at_GI_7656889-A        | EST: zd54f12.r1 Soares fetal heart           | 12834.689 |
| 13734 | AB002360_at_GI_27777654-S     | Human mRNA for KIAA0362 gene, partial        | 12839.148 |
| 13735 | M37583_at_GI_20336749-S       | H2AZ H2AZ histone                            | 12858.492 |
| 13736 | RC_AA455261_at_GI_28372504-S  | Human DNA sequence from clone 742C19         | 12860.252 |
| 13737 | W95089_at_NA_illumina         | EST: zh46g09.r1 Soares fetal liver spleen    | 12866.519 |
| 13738 | RC_AA425741_at_GI_31543284-S  | Homo sapiens clone 23596 mRNA                | 12868.696 |
| 13739 | RC_AA256556_f_at_GI_7019572-S | EST: zr86f05.s1 Soares NhHMPu S1             | 12869.431 |
| 13740 | M62324_at_NA_illumina         | Modulator recognition factor I (MRF-1)       | 12873.135 |
| 13741 | M62324_at-2_NA_illumina       | Human modulator recognition factor I         | 12873.135 |
| 13742 | W28366_at_NA_illumina         | Homo sapiens clone 24800 mRNA                | 12891.498 |
| 13743 | RC_AA056756_at_NA_illumina    | EST: zk81g03.s1 Soares pregnant uterus       | 12899.401 |
| 13744 | X72727_at_GI_14165436-A       | HNRPK Heterogeneous nuclear                  | 12903.203 |
| 13745 | AA131252_at_NA_illumina       | EST: zl31g02.r1 Soares pregnant uterus       | 12906.694 |
| 13746 | H12661_at_GI_40254925-S       | EST: yj13c08.r1 Homo sapiens cDNA            | 12920.155 |
| 13747 | RC_AA460651_at_NA_illumina    | Eukaryotic translation initiation factor 2,  | 12926.376 |
| 13748 | R72037_at_GI_23510452-S       | EST: yj86c09.r1 Homo sapiens cDNA            | 12932.668 |



|       |                              |                                             |            |
|-------|------------------------------|---------------------------------------------|------------|
| 13749 | T68246_at_GI_14591931-S      | EST: yc40f01.r1 Homo sapiens cDNA           | 12935.249  |
| 13750 | M16336_s_at-2_NA_illumina    | CD2 antigen (p50), sheep red blood cell     | 12938.2705 |
| 13751 | M16336_s_at_GI_31542293-S    | CD2 CD2 antigen (p50), sheep red blood      | 12938.2705 |
| 13752 | W07097_at_NA_illumina        | Tetraspan 5                                 | 12951.183  |
| 13753 | M83670_s_at_NA_illumina      | Carbonic anhydrase IV                       | 12956.416  |
| 13754 | M21121_s_at_NA_illumina      | Small inducible cytokine A5 (RANTES)        | 12971.397  |
| 13755 | RC_AA469953_at_NA_illumina   | EST: zt98b09.s1 Soares testis NHT Homo      | 12972.365  |
| 13756 | H83527_s_at_NA_illumina      | KIAA0618 gene product                       | 12979.092  |
| 13757 | M29540_at_GI_11386170-S      | CARCINOEMBRYONIC ANTIGEN                    | 12983.305  |
| 13758 | C01750_at_GI_42794776-S      | EST: HUMGS0003683, Human Gene               | 12995.93   |
| 13759 | RC_AA193204_at_NA_illumina   | Arg/Abl-interacting protein ArgBP2          | 12996.877  |
| 13760 | RC_AA055475_at_NA_illumina   | EST: zf21b01.s1 Soares fetal heart          | 12997.676  |
| 13761 | M26730_s_at_NA_illumina      | Mitochondrial ubiquinone-binding protein    | 12999.44   |
| 13762 | L33842_rna1_at_GI_4504688-S  | (clone FFE-7) type II inosine               | 13001.86   |
| 13763 | RC_AA410892_at_GI_25952117-A | EST: zv03c12.s1 Soares NhHMPu S1            | 13008.838  |
| 13764 | D31058_s_at_NA_illumina      | EST: Human fetal-lung cDNA 5'-end           | 13010.12   |
| 13765 | AB002368_at_GI_37541412-S    | Human mRNA for KIAA0370 gene, partial       | 13011.662  |
| 13766 | M96982_at_GI_5803206-S       | SPLICING FACTOR U2AF 35 KD                  | 13028.194  |
| 13767 | RC_AA428902_at_NA_illumina   | EST: zv49d11.s1 Soares ovary tumor          | 13030.125  |
| 13768 | RC_AA447769_at_GI_31317254-S | EST: aa20e01.s1 Soares NhHMPu S1            | 13040.303  |
| 13769 | RC_AA452020_at_NA_illumina   | EST: zw57b10.s1 Soares total fetus          | 13044.896  |
| 13770 | HG2147-HT2217_at_NA_illumina | Mucin 3, Intestinal (Gb:M55405)             | 13047.686  |
| 13771 | U06643_s_at-2_NA_illumina    | Lectin, galactoside-binding, soluble, 7     | 13048.879  |
| 13772 | U06643_s_at_GI_4504984-S     | Keratinocyte lectin 14 (HKL-14) mRNA        | 13048.879  |
| 13773 | M63904_at_GI_4504038-S       | GNA15 Guanine nucleotide binding protein    | 13050.025  |
| 13774 | M19961_at_GI_17017987-S      | COX5B Cytochrome c oxidase subunit Vb       | 13067.072  |
| 13775 | N74749_at_NA_illumina        | EST: yv52a12.r1 Soares fetal liver spleen   | 13072.076  |
| 13776 | M35252_at_NA_illumina        | TUMOR-ASSOCIATED ANTIGEN CO-029             | 13077.788  |
| 13777 | RC_AA281074_at_GI_21361610-S | EST: zs98b03.s1 NCI_CGAP_GCB1               | 13081.038  |
| 13778 | N90328_at_GI_10190685-S      | EST: yz88b05.r1 Soares multiple sclerosis   | 13082.519  |
| 13779 | RC_AA598695_at_NA_illumina   | EST: ae49b03.s1 Stratagene lung             | 13082.718  |
| 13780 | RC_AA428190_at_NA_illumina   | Homo sapiens clone FBD3 Cri-du-chat         | 13090.486  |
| 13781 | M23178_s_at_NA_illumina      | MACROPHAGE INFLAMMATORY                     | 13093.752  |
| 13782 | M19645_at_GI_21361242-S      | 78 KD GLUCOSE REGULATED PROTEIN             | 13095.452  |
| 13783 | RC_AA278817_at_GI_27894367-S | EST: zs78d11.s1 NCI_CGAP_GCB1               | 13095.503  |
| 13784 | RC_AA152302_at_GI_7330334-S  | EST: zl03d02.s1 Soares pregnant uterus      | 13096.69   |
| 13785 | RC_AA449479_at_GI_7661743-S  | EST: zx08g02.s1 Soares total fetus          | 13096.997  |
| 13786 | D38047_at_GI_39812361-S      | 26S PROTEASOME REGULATORY                   | 13098.833  |
| 13787 | RC_AA464180_at_NA_illumina   | EST: zx83f04.s1 Soares ovary tumor          | 13099.507  |
| 13788 | RC_AA460234_at_GI_42659957-S | EST: zx67b04.s1 Soares total fetus          | 13121.118  |
| 13789 | RC_AA453628_at_NA_illumina   | EST: zx48c06.s1 Soares testis NHT Homo      | 13126.368  |
| 13790 | H29161_at_NA_illumina        | EST: ym59h02.r1 Homo sapiens cDNA           | 13139.615  |
| 13791 | RC_AA441897_at_NA_illumina   | Eukaryotic translation initiation factor 4E | 13140.752  |

|       |                              |                                            |           |
|-------|------------------------------|--------------------------------------------|-----------|
| 13792 | M19507_at_GI_4557758-S       | MPO Myeloperoxidase                        | 13148.06  |
| 13793 | AA094441_at_GI_21361950-S    | Glutathione peroxidase 3 (plasma)          | 13148.177 |
| 13794 | W25847_at_NA_illumina        | Homo sapiens mRNA for GEF-2 protein        | 13152.882 |
| 13795 | RC_AA432177_at_NA_illumina   | EST: zw71f12.s1 Soares testis NHT Homo     | 13165.174 |
| 13796 | AA255577_at_NA_illumina      | EST: zs31b05.r1 NCI_CGAP_GCB1 Homo         | 13188.788 |
| 13797 | K03431_cds1_at_GI_4826761-S  | HPR gene (haptoglobin-related protein)     | 13201.19  |
| 13798 | RC_AA280623_at_NA_illumina   | Homo sapiens 45kDa splicing factor         | 13208.656 |
| 13799 | D55654_at_GI_21735619-S      | MDH1 Malate dehydrogenase 1, NAD           | 13249.042 |
| 13800 | RC_AA236553_at_NA_illumina   | Fatty-acid-Coenzyme A ligase, long-chain   | 13251.384 |
| 13801 | RC_AA485655_at_NA_illumina   | Human low-Mr GTP-binding protein           | 13255.763 |
| 13802 | AA033766_s_at_GI_11545796-A  | EST: zk19b12.r1 Soares pregnant uterus     | 13257.612 |
| 13803 | D79891_at_GI_22035617-S      | EST: Human aorta cDNA 5'-end GEN-          | 13267.478 |
| 13804 | RC_AA025521_at_GI_9257203-S  | Homo sapiens erythroblast macrophage       | 13290.397 |
| 13805 | X53416_at_GI_4503744-S       | FLN1 Filamin 1 (actin-binding protein-280) | 13302.887 |
| 13806 | U40434_at_GI_7108357-A       | Pre-pro-megakaryocyte potentiating factor  | 13308.817 |
| 13807 | RC_AA456073_at_NA_illumina   | Human amino acid transport-related         | 13313.422 |
| 13808 | RC_AA278400_f_at_NA_illumina | Homo sapiens HRIHFB2115 mRNA,              | 13317.126 |
| 13809 | RC_AA287917_at_NA_illumina   | EST: zs55b10.s1 NCI_CGAP_GCB1              | 13320.969 |
| 13810 | Z68228_s_at_GI_12056467-A    | JUP Junction plakoglobin                   | 13327.082 |
| 13811 | D26599_at_GI_22538463-S      | Proteasome subunit HsC7-I                  | 13360.463 |
| 13812 | AA045870_at_NA_illumina      | EST: zk75a04.r1 Soares pregnant uterus     | 13366.858 |
| 13813 | W28391_at_GI_5453841-S       | Proliferation-associated 2G4, 38kD         | 13378.589 |
| 13814 | U54778_at_GI_34304385-S      | 14-3-3 epsilon mRNA                        | 13383.143 |
| 13815 | RC_AA150776_at_NA_illumina   | Homo sapiens clone 24405 mRNA              | 13390.886 |
| 13816 | M59815_at_NA_illumina        | C4A Complement component 4A                | 13391.699 |
| 13817 | RC_AA436655_at_GI_39780596-S | EST: zv57c03.s1 Soares testis NHT Homo     | 13399.643 |
| 13818 | RC_AA598453_s_at_NA_illumina | H.sapiens mRNA for retrotransposon         | 13401.838 |
| 13819 | RC_AA257977_at_NA_illumina   | Tyrosyl-tRNA synthetase                    | 13407.396 |
| 13820 | U57342_at_GI_4885486-S       | Myelodysplasia/myeloid leukemia factor 2   | 13419.712 |
| 13821 | RC_AA479727_s_at_NA_illumina | EST: zu35b01.s1 Soares ovary tumor         | 13423.146 |
| 13822 | T60239_s_at_NA_illumina      | EST: yb68f06.r1 Homo sapiens cDNA          | 13425.425 |
| 13823 | RC_AA449773_at_GI_14165470-S | EST: zx07h07.s1 Soares total fetus         | 13429.507 |
| 13824 | U16799_s_at_GI_37595556-S    | Na,K-ATPase beta-1 subunit mRNA            | 13443.613 |
| 13825 | L08010_at_GI_30181230-S      | Regenerating protein I beta                | 13448.788 |
| 13826 | AA460511_at_GI_33359693-A    | EST: zx51h09.r1 Soares testis NHT Homo     | 13449.282 |
| 13827 | X99076_rna1_at_GI_5453799-S  | NRGN gene, exons 2,3 & 4 (joined CDS)      | 13453.094 |
| 13828 | RC_AA416578_at_NA_illumina   | EST: zu18d03.s1 Soares NhHMPu S1           | 13464.98  |
| 13829 | RC_AA436005_at_GI_40538795-S | EST: zu03c01.s1 Soares testis NHT Homo     | 13478.34  |
| 13830 | RC_AA449320_at_NA_illumina   | EST: zx06e03.s1 Soares total fetus         | 13481.685 |
| 13831 | H21219_at_NA_illumina        | RAB6, member RAS oncogene family           | 13506.414 |
| 13832 | RC_AA070091_at_NA_illumina   | EST: zm67b11.s1 Stratagene                 | 13523.981 |
| 13833 | RC_AA424146_at_NA_illumina   | EST: zv81c01.s1 Soares total fetus         | 13536.473 |
| 13834 | U48437_at_GI_21361259-S      | Amyloid precursor-like protein 1 mRNA      | 13542.59  |

|       |                                |                                             |           |
|-------|--------------------------------|---------------------------------------------|-----------|
| 13835 | AA446088_at_GI_24432049-S      | EST: zw66h03.r1 Soares testis NHT Homo      | 13546.83  |
| 13836 | D63878_at_NA_illumina          | PROBABLE PROTEIN DISULFIDE                  | 13557.278 |
| 13837 | RC_AA478287_at_NA_illumina     | EST: zu45c07.s1 Soares ovary tumor          | 13559.017 |
| 13838 | U22376_cds2_s_at_NA_illumina   | C-myb gene extracted from Human (c-         | 13560.384 |
| 13839 | RC_C13971_at_NA_illumina       | EST: Human fetal brain cDNA 3'-end GEN-     | 13567.257 |
| 13840 | AA157520_at_NA_illumina        | EST: zo44g05.r1 Stratagene endothelial      | 13570.646 |
| 13841 | RC_AA283180_at_NA_illumina     | EST: zt17c12.s1 Soares ovary tumor          | 13571.4   |
| 13842 | RC_AA427442_at_NA_illumina     | Guanine nucleotide regulatory factor        | 13573.649 |
| 13843 | X05908_at_GI_4502100-S         | ANX1 Annexin I (lipocortin I)               | 13580.945 |
| 13844 | RC_AA481440_at_GI_33149330-S   | EST: zv45a05.s1 Soares ovary tumor          | 13585.614 |
| 13845 | M94345_at_GI_4502560-S         | CAPG Capping protein (actin filament),      | 13586.416 |
| 13846 | U20734_s_at_GI_44921611-S      | JUNB Jun B proto-oncogene                   | 13589.114 |
| 13847 | AB006781_s_at_GI_6006017-S     | Galectin-4                                  | 13593.139 |
| 13848 | U67092_s_at_NA_illumina        | Ataxia-telangiectasia locus protein (ATM)   | 13593.565 |
| 13849 | H45382_at_NA_illumina          | EST: yn99b12.r1 Homo sapiens cDNA           | 13608.468 |
| 13850 | U72511_at_NA_illumina          | B-cell receptor associated protein (hBAP)   | 13609.936 |
| 13851 | T34752_s_at_NA_illumina        | EST: EST74662 Homo sapiens cDNA 5'          | 13619.88  |
| 13852 | RC_AA179933_at_NA_illumina     | Human X2 box repressor mRNA, complete       | 13638.567 |
| 13853 | D29805_at_GI_13929461-S        | GGTB2 Glycoprotein-4-beta-                  | 13650.631 |
| 13854 | RC_AA102644_at_NA_illumina     | EST: zn71h03.s1 Stratagene NT2              | 13661.095 |
| 13855 | AA146888_s_at_GI_7706336-S     | EST: zo43a06.r1 Stratagene endothelial      | 13678.679 |
| 13856 | D52609_s_at_NA_illumina        | EST: Human fetal brain cDNA 5'-end GEN-     | 13687.67  |
| 13857 | AB002308_at_GI_37539834-S      | KIAA0310 gene product                       | 13714.853 |
| 13858 | D45248_at_GI_30410791-S        | Proteasome activator hPA28 subunit beta     | 13716.335 |
| 13859 | X75861_at_GI_4507432-S         | TEGT Testis enhanced gene transcript        | 13723.318 |
| 13860 | X64364_at_GI_38372922-A        | BSG Basigin                                 | 13729.619 |
| 13861 | L19437_at_GI_5803186-S         | TALDO Transaldolase                         | 13730.306 |
| 13862 | Z50022_at_GI_11038670-S        | Surface glycoprotein                        | 13743.729 |
| 13863 | X62466_at_NA_illumina          | CDW52 CDW52 antigen (CAMPATH-1              | 13748.806 |
| 13864 | RC_AA406388_at_NA_illumina     | EST: zv10e03.s1 Soares NhHMPu S1            | 13763.137 |
| 13865 | C02369_at_NA_illumina          | Homo sapiens C21orf4 mRNA, complete         | 13764.483 |
| 13866 | RC_AA234530_s_at_GI_11079227-S | Human N-ethylmaleimide-sensitive factor     | 13777.207 |
| 13867 | L13738_at_NA_illumina          | Activated p21cdc42Hs kinase (ack) mRNA      | 13801.158 |
| 13868 | L13738_at-2_NA_illumina        | Human activated p21cdc42Hs kinase (ack)     | 13801.158 |
| 13869 | RC_AA452410_at_GI_22779931-A   | Homo sapiens mRNA for KIAA0796              | 13804.545 |
| 13870 | RC_AA489707_at_NA_illumina     | EST: aa50f01.s1 NCI_CGAP_GCB1 Homo          | 13805.401 |
| 13871 | AA311368_at_GI_4505460-S       | Nuclear restricted protein, BTB domain-like | 13815.729 |
| 13872 | N94879_at_NA_illumina          | Visinin-like 1                              | 13849.242 |
| 13873 | L49380_at_GI_42544126-I        | Transcription factor ZFM1 isoform B3        | 13849.832 |
| 13874 | AA426304_s_at_NA_illumina      | EST: zw11g07.r1 Soares NhHMPu S1            | 13853.313 |
| 13875 | AB002307_at_GI_5730066-S       | Human mRNA for KIAA0309 gene, partial       | 13854.101 |
| 13876 | RC_AA053319_at_NA_illumina     | EST: zk69e05.s1 Soares pregnant uterus      | 13855.986 |
| 13877 | RC_AA195229_s_at_GI_8922548-S  | EST: zr34g09.s1 Soares NhHMPu S1            | 13857.369 |

|       |                              |                                                 |           |
|-------|------------------------------|-------------------------------------------------|-----------|
| 13878 | RC_AA442261_at_NA_illumina   | EST: zv61h04.s1 Soares testis NHT Homo          | 13862.319 |
| 13879 | J05582_s_at_GI_28916690-A    | MUC1 Mucin 1, transmembrane                     | 13864.225 |
| 13880 | RC_AA452256_at_NA_illumina   | EST: zx15g09.s1 Soares total fetus              | 13870.035 |
| 13881 | AA090434_at_GI_31742531-S    | Diaphanous (Drosophila, homolog) 1              | 13878.921 |
| 13882 | AA131547_at_GI_22027476-A    | Homo sapiens phosphatidylinositol               | 13904.546 |
| 13883 | X72755_at_GI_4505186-S       | Humig mRNA                                      | 13905.863 |
| 13884 | RC_AA479299_at_NA_illumina   | EST: zv21f04.s1 Soares NhHMPu S1                | 13906.153 |
| 13885 | AA059415_at_NA_illumina      | EST: zl95a03.r1 Stratagene corneal              | 13921.671 |
| 13886 | RC_AA251237_at_NA_illumina   | EST: zs04g08.s1 NCI_CGAP_GCB1                   | 13934.126 |
| 13887 | AA187814_at_NA_illumina      | Homo sapiens GA17 protein mRNA,                 | 13940.472 |
| 13888 | RC_AA037409_at_GI_45243500-S | EST: zc03h03.s1 Soares parathyroid              | 13942.066 |
| 13889 | D31289_at_GI_21703709-S      | EST: Human fetal-lung cDNA 5'-end               | 13958.71  |
| 13890 | RC_AA053341_at_NA_illumina   | EST: zf60e10.s1 Soares retina N2b4HR            | 13964.85  |
| 13891 | Y00503_at_GI_40217850-S      | KRT19 Keratin 19                                | 13966.833 |
| 13892 | AA156897_s_at_NA_illumina    | EST: zl20b07.r1 Soares pregnant uterus          | 13998.626 |
| 13893 | RC_AA045814_at_NA_illumina   | EST: zk75c01.s1 Soares pregnant uterus          | 14002.052 |
| 13894 | RC_AA425302_at_GI_34335240-S | EST: zw46b05.s1 Soares total fetus              | 14006.249 |
| 13895 | RC_AA258801_i_at_NA_illumina | C-terminal binding protein 1                    | 14009.804 |
| 13896 | S53911_at-2_NA_illumina      | CD34 antigen                                    | 14011.786 |
| 13897 | S53911_at_GI_4502660-S       | CD34 CD34 antigen (hemopoietic                  | 14011.786 |
| 13898 | RC_AA025213_at_GI_18105036-S | Cytochrome c oxidase subunit VII-related        | 14012.295 |
| 13899 | X95072_s_at_NA_illumina      | H.sapiens mRNA for translin associated          | 14023.751 |
| 13900 | HG3566-HT3769_at_NA_illumina | Zinc Finger Protein (Gb:M88359)                 | 14029.798 |
| 13901 | Z29481_at_GI_6912405-S       | 3-HYDROXYANTHRANILATE 3,4-                      | 14037.591 |
| 13902 | Z29481_at-2_NA_illumina      | 3-HYDROXYANTHRANILATE 3,4-                      | 14037.591 |
| 13903 | U09770_at_GI_39725694-S      | Cysteine-rich heart protein (hCRHP)             | 14039.91  |
| 13904 | RC_AA233548_at_GI_20127520-S | EST: zr43a04.s1 Soares NhHMPu S1                | 14068.359 |
| 13905 | RC_AA129390_at_NA_illumina   | EST: zn85b02.s1 Stratagene lung                 | 14071.497 |
| 13906 | RC_AA057738_at_NA_illumina   | EST: zl76f10.s1 Stratagene colon                | 14077.216 |
| 13907 | X71345_f_at_GI_21536451-S    | PRSS3 Protease, serine, 3 (trypsin 3)           | 14108.922 |
| 13908 | RC_AA370353_at_NA_illumina   | EST: EST82247 Prostate gland I Homo             | 14117.105 |
| 13909 | AA412412_at_GI_7706450-S     | Homo sapiens Chromosome 16 BAC clone            | 14120.605 |
| 13910 | W20276_f_at_GI_31543062-S    | EST: zb44a05.r1 Soares fetal lung               | 14120.658 |
| 13911 | X60364_s_at_NA_illumina      | Human ALAS mRNA for 5-aminolevulinate           | 14123.037 |
| 13912 | M38690_at_GI_21237762-S      | CD9 CD9 antigen                                 | 14144.089 |
| 13913 | M64098_at_GI_42716278-A      | High density lipoprotein binding protein        | 14152.72  |
| 13914 | L09209_s_at_GI_4502146-S     | APLP2 Amyloid beta (A4) precursor-like          | 14153.211 |
| 13915 | X70940_s_at_GI_25453470-S    | EEF1A2 Eukaryotic translation elongation        | 14157.732 |
| 13916 | AA071088_at_GI_33186900-S    | EST: zm66c09.r1 Stratagene                      | 14175.318 |
| 13917 | RC_AA450078_at_NA_illumina   | EST: zx42a07.s1 Soares total fetus              | 14180.794 |
| 13918 | U30521_at_GI_4758865-S       | FRAP FK506 binding protein 12- <i>rapamycin</i> | 14184.755 |
| 13919 | RC_AA101767_at_GI_38683859-S | EST: zk96d09.s1 Soares pregnant uterus          | 14201.791 |
| 13920 | H09364_s_at_NA_illumina      | EST: yl95a06.r1 Homo sapiens cDNA               | 14206.442 |

|       |                               |                                             |            |
|-------|-------------------------------|---------------------------------------------|------------|
| 13921 | X04526_at_NA_illumina         | GNB1 Guanine nucleotide binding protein     | 14215.173  |
| 13922 | RC_AA348466_s_at_NA_illumina  | Regulator of G-protein signalling 5         | 14231.12   |
| 13923 | RC_AA430355_at_NA_illumina    | EST: zw20e04.s1 Soares ovary tumor          | 14231.668  |
| 13924 | M62302_at_NA_illumina         | Growth/differentiation factor 1 (GDF-1)     | 14233.926  |
| 13925 | M62302_at-2_NA_illumina       | Human growth/differentiation factor 1 (GDF- | 14233.926  |
| 13926 | X16135_at_GI_4557644-S        | HETEROGENEOUS NUCLEAR                       | 14241.314  |
| 13927 | M11722_at_GI_29788761-S       | Terminal transferase mRNA                   | 14244.833  |
| 13928 | L11373_at_NA_illumina         | Protocadherin 43 mRNA for abbreviated       | 14277.954  |
| 13929 | AA310450_at_GI_7706321-S      | EST: EST181264 Jurkat T-cells V Homo        | 14289.661  |
| 13930 | M88279_at_GI_17149846-S       | FKBP4 FK506-binding protein 4 (59kD)        | 14293.866  |
| 13931 | RC_AA599037_s_at_GI_18375524- | SWI/SNF related, matrix associated, actin   | 14294.481  |
| 13932 | W56613_at_NA_illumina         | SH3 binding protein                         | 14297.513  |
| 13933 | AA424111_at_NA_illumina       | EST: zv80e06.r1 Soares total fetus          | 14307.977  |
| 13934 | AB002312_at_GI_32261302-S     | Human mRNA for KIAA0314 gene, partial       | 14318.425  |
| 13935 | RC_AA464708_at_NA_illumina    | EST: zx82b11.s1 Soares ovary tumor          | 14320.738  |
| 13936 | RC_AA070735_at_NA_illumina    | EST: zm53a09.s1 Stratagene fibroblast       | 14321.623  |
| 13937 | RC_AA417718_at_GI_7705832-S   | EST: zv01e07.s1 NCI_CGAP_GCB1               | 14356.05   |
| 13938 | RC_AA287623_at_GI_24307898-S  | GTPase, human homolog of E. coli            | 14357.508  |
| 13939 | RC_AA621430_at_NA_illumina    | Doublecortex; lissencephaly, X-linked       | 14359.489  |
| 13940 | RC_AA481430_at_NA_illumina    | EST: zv06g11.s1 Soares NhHMPu S1            | 14364.934  |
| 13941 | M21054_s_at_NA_illumina       | Phospholipase A2, group IB (pancreas)       | 14375.183  |
| 13942 | RC_AA234094_at_GI_31543542-S  | Homo sapiens clone 24800 mRNA               | 14384.149  |
| 13943 | T48154_s_at_NA_illumina       | Homo sapiens mRNA for H-2K binding          | 14389.281  |
| 13944 | X75593_at_GI_34850075-S       | Rab 13                                      | 14394.947  |
| 13945 | X15729_s_at_GI_13514826-S     | P68 PROTEIN                                 | 14416.272  |
| 13946 | T34896_s_at_NA_illumina       | EST: EST76547 Homo sapiens cDNA 5'          | 14420.76   |
| 13947 | RC_AA464844_at_NA_illumina    | EST: zx44g03.s1 Soares total fetus          | 14432.35   |
| 13948 | L22009_at_GI_5031752-S        | HnRNP H mRNA                                | 14450.74   |
| 13949 | U78095_at_GI_10863908-S       | Placental bikunin mRNA                      | 14464.912  |
| 13950 | T55688_s_at_GI_21450799-S     | EST: yb39g06.r1 Homo sapiens cDNA           | 14468.056  |
| 13951 | D31883_at_GI_21284386-A       | KIAA0059 gene                               | 14476.574  |
| 13952 | RC_AA459891_at_NA_illumina    | EST: zx73e01.s1 Soares ovary tumor          | 14488.444  |
| 13953 | RC_AA182001_i_at_NA_illumina  | EST: zp62f10.s1 Stratagene endothelial      | 14494.621  |
| 13954 | AA075599_at_NA_illumina       | EST: zm88c03.r1 Stratagene ovarian          | 14500.005  |
| 13955 | RC_AA464935_at_NA_illumina    | Homo sapiens mRNA for KIAA0517              | 14525.729  |
| 13956 | C15965_at_NA_illumina         | EST: Human fetal brain cDNA 5'-end GEN-     | 14527.019  |
| 13957 | RC_AA430032_at_GI_11038651-S  | Pituitary tumor-transforming 1              | 14557.463  |
| 13958 | N77151_at_GI_11037056-S       | Homo sapiens mRNA for KIAA0799              | 14561.547  |
| 13959 | RC_AA135106_at_GI_9558765-A   | EST: zo24d04.s1 Stratagene colon            | 14585.6875 |
| 13960 | AA093823_at_GI_7657479-S      | EST: cl1154.seq.F Fetal heart, Lambda       | 14601.371  |
| 13961 | X55733_at_GI_4503532-S        | EUKARYOTIC INITIATION FACTOR 4B             | 14603.04   |
| 13962 | RC_AA458454_at_NA_illumina    | EST: zx73g05.s1 Soares ovary tumor          | 14615.472  |
| 13963 | W15482_at_GI_4758789-S        | NADH dehydrogenase (ubiquinone) 1 beta      | 14620.726  |

|       |                                |                                             |            |
|-------|--------------------------------|---------------------------------------------|------------|
| 13964 | Y10807_s_at_GI_38195086-A      | Suppressor for yeast mutant                 | 14635.314  |
| 13965 | X56468_at_NA_illumina          | 14-3-3 PROTEIN TAU                          | 14650.047  |
| 13966 | X76717_at_GI_31543213-S        | MT1L Metallothionein 1L                     | 14661.132  |
| 13967 | M21389_at_GI_17318577-S        | KRT5 Keratin 5 (epidermolysis bullosa       | 14665.869  |
| 13968 | W81301_at_NA_illumina          | EST: zd85a12.r1 Soares fetal heart          | 14676.635  |
| 13969 | RC_AA479012_at_GI_13775601-A   | EST: zu39e05.s1 Soares ovary tumor          | 14697.412  |
| 13970 | J02621_s_at_GI_34147704-S      | Non-histone chromosomal protein HMG-14      | 14733.2705 |
| 13971 | RC_AA069456_at_GI_41281511-S   | KIAA0438 gene product                       | 14733.311  |
| 13972 | AB002322_at_NA_illumina        | Human mRNA for KIAA0324 gene, partial       | 14760.777  |
| 13973 | HG1078-HT1078_at_NA_illumina   | Lamin-Like Protein (Gb:M24732)              | 14764.685  |
| 13974 | T30687_s_at_NA_illumina        | Human PDGF associated protein mRNA,         | 14771.6    |
| 13975 | L16794_s_at_GI_40254821-S      | Human transcription factor (MEF2) mRNA,     | 14778.51   |
| 13976 | RC_AA279315_at_GI_37674208-S   | Homo sapiens chromosome 19, cosmid          | 14783.261  |
| 13977 | U48959_at_GI_16950622-A        | Myosin light chain kinase (MLCK) mRNA       | 14783.683  |
| 13978 | C00810_s_at_NA_illumina        | Homo sapiens clone 24733 mRNA               | 14783.688  |
| 13979 | RC_AA147364_at_NA_illumina     | Homo sapiens clone 23714 mRNA               | 14808.359  |
| 13980 | RC_AA428607_at_NA_illumina     | EST: zw69c08.s1 Soares testis NHT           | 14812.665  |
| 13981 | D13146_cds1_at_GI_38570090-S   | 2',3'-cyclic-nucleotide 3'-                 | 14813.202  |
| 13982 | M14058_at_GI_31542249-S        | C1R Complement component C1r                | 14821.888  |
| 13983 | H46792_at_GI_36054052-S        | Fatty acid binding protein 7, brain         | 14881.102  |
| 13984 | RC_AA411819_at_GI_15147332-S   | Homo sapiens mRNA for KIAA0898              | 14883.988  |
| 13985 | D00632_at_GI_6006000-S         | GPX3 Glutathione peroxidase 3 (plasma)      | 14929.526  |
| 13986 | D26129_at_GI_38201687-A        | RNS1 Ribonuclease A (pancreatic)            | 14934.694  |
| 13987 | K01911_at_GI_31542152-S        | NPY Neuropeptide Y                          | 14935.193  |
| 13988 | AA330771_s_at_NA_illumina      | Protein tyrosine phosphatase type IVA,      | 14939.643  |
| 13989 | RC_AA426521_at_GI_4505324-S    | Nuclear autoantigen of 14 kDa               | 14939.744  |
| 13990 | U20391_rna6_at_GI_12719454-A   | Folate receptor (FOLR1) gene                | 14948.74   |
| 13991 | HG4541-HT4946_s_at_NA_illumina | Transformation-Related Protein              | 14959.39   |
| 13992 | AA441970_at_GI_7662159-S       | KIAA0494 gene product                       | 15009.257  |
| 13993 | AF007216_at_GI_4507024-S       | Solute carrier family 4, sodium bicarbonate | 15016.093  |
| 13994 | D76435_at_GI_22547181-S        | Zic protein                                 | 15022.92   |
| 13995 | RC_AA053022_s_at_NA_illumina   | EST: zl72f03.s1 Stratagene colon            | 15024.563  |
| 13996 | D25274_at_GI_38505163-A        | Randomly sequenced mRNA                     | 15029.881  |
| 13997 | RC_AA252522_at_NA_illumina     | Discs, large (Drosophila) homolog 1         | 15033.973  |
| 13998 | AA431268_at_NA_illumina        | EST: zw78g06.r1 Soares testis NHT Homo      | 15041.737  |
| 13999 | W01587_s_at_NA_illumina        | EST: za80f11.r1 Soares fetal lung           | 15068.831  |
| 14000 | J05614_at_GI_33239450-A        | Proliferating cell nuclear antigen (PCNA)   | 15107.644  |
| 14001 | RC_AA447752_at_NA_illumina     | EST: aa18g05.s1 Soares NhHMPu S1            | 15108.648  |
| 14002 | AA372630_s_at_NA_illumina      | Homo sapiens GW112 protein (GW112)          | 15118.958  |
| 14003 | RC_AA283758_at_GI_13699866-S   | EST: zs48b04.s1 NCI_CGAP_GCB1               | 15123.2705 |
| 14004 | M31667_f_at_NA_illumina        | CYTOCHROME P450 IA2                         | 15127.167  |
| 14005 | RC_AA476927_at_NA_illumina     | EST: zu38c11.s1 Soares ovary tumor          | 15127.231  |
| 14006 | RC_AA609869_at_GI_11345483-S   | EST: af08c02.s1 Soares testis NHT Homo      | 15140.401  |

|       |                                |                                         |            |
|-------|--------------------------------|-----------------------------------------|------------|
| 14007 | U51478_at_GI_4502280-S         | Sodium/potassium-transporting ATPase    | 15140.938  |
| 14008 | RC_AA287666_at_GI_31982894-S   | EST: zs53b07.s1 NCI_CGAP_GCB1           | 15143.358  |
| 14009 | AA284647_at_GI_14670374-S      | EST: zt23g10.r1 Soares ovary tumor      | 15158.734  |
| 14010 | M91438_at_GI_10863910-S        | Kazal-type serine proteinase (HUSI-II)  | 15175.304  |
| 14011 | RC_AA293327_at_NA_illumina     | Homo sapiens NADP-dependent isocitrate  | 15186.466  |
| 14012 | RC_AA487561_at_NA_illumina     | EST: ab23e06.s1 Stratagene lung         | 15187.814  |
| 14013 | RC_AA431739_at_NA_illumina     | Human DNA sequence from PAC 487J7       | 15203.354  |
| 14014 | U43368_at_GI_39725673-S        | Vascular endothelial growth factor B    | 15208.859  |
| 14015 | RC_AA435644_s_at_NA_illumina   | EST: zt85d09.s1 Soares testis NHT Homo  | 15209.029  |
| 14016 | RC_AA025905_f_at_GI_22035645-A | Homo sapiens TNF-inducible protein      | 15211.685  |
| 14017 | RC_AA130645_s_at_NA_illumina   | EST: zo10f03.s1 Stratagene              | 15213.03   |
| 14018 | RC_AA424586_at_NA_illumina     | Kinesin family protein 3B               | 15213.738  |
| 14019 | D89667_at_GI_22202636-A        | C-myc binding protein                   | 15218.346  |
| 14020 | RC_AA463629_at_GI_29725604-S   | Homo sapiens mRNA for KIAA0721          | 15219.25   |
| 14021 | RC_AA435740_at_GI_20149616-S   | EST: zt79d05.s1 Soares testis NHT Homo  | 15230.196  |
| 14022 | N77574_s_at_NA_illumina        | Human DNA sequence from clone 341E18    | 15235.258  |
| 14023 | RC_AA426616_at_NA_illumina     | EST: zv47f11.s1 Soares ovary tumor      | 15246.476  |
| 14024 | RC_AA437374_s_at_NA_illumina   | UBIQUITIN CARBOXYL-TERMINAL             | 15252.284  |
| 14025 | M19169_at_GI_19882250-S        | Cystatin SN                             | 15268.867  |
| 14026 | RC_AA252242_at_GI_5453959-S    | EST: zr64g04.s1 Soares NhHMPu S1        | 15277.5625 |
| 14027 | J04182_at_NA_illumina          | LAMP1 Lysosome-associated membrane      | 15285.74   |
| 14028 | U94592_at_GI_13259540-S        | Uncoupling protein homolog (UCPH)       | 15288.492  |
| 14029 | R73235_at_NA_illumina          | EST: yl09c07.r1 Homo sapiens cDNA       | 15292.057  |
| 14030 | X15880_at_GI_15011912-S        | COL6A1 Collagen, type VI, alpha 1       | 15292.599  |
| 14031 | C01306_at_NA_illumina          | EST: HUMGS0005210, Human Gene           | 15292.892  |
| 14032 | X80818_at_NA_illumina          | GRM4 Glutamate receptor, metabotropic 4 | 15319.178  |
| 14033 | RC_AA476944_at_GI_23308566-S   | EST: zu38e07.s1 Soares ovary tumor      | 15327.625  |
| 14034 | RC_AA262417_at_GI_38327520-S   | EST: zs16g02.s1 NCI_CGAP_GCB1           | 15331.998  |
| 14035 | U05861_at_GI_24497580-S        | DDH1 Dihydrodiol dehydrogenase          | 15343.058  |
| 14036 | RC_AA256678_at_NA_illumina     | EST: zr82h08.s1 Soares NhHMPu S1        | 15376.531  |
| 14037 | RC_AA436027_at_GI_7705876-S    | EST: zu03f10.s1 Soares testis NHT Homo  | 15389.702  |
| 14038 | RC_AA424140_at_GI_9951922-S    | Carbonic anhydrase XI                   | 15399.289  |
| 14039 | C00155_at_GI_40288287-S        | Homo sapiens clone 24658 mRNA           | 15414.883  |
| 14040 | RC_AA496357_at_NA_illumina     | Homo sapiens SKB1Hs mRNA, complete      | 15422.732  |
| 14041 | D50840_at-2_NA_illumina        | UDP-glucose ceramide                    | 15428.059  |
| 14042 | D50840_at_GI_4507810-S         | Ceramide glucosyltransferase            | 15428.059  |
| 14043 | W69316_at_NA_illumina          | EST: zd46h01.r1 Soares fetal heart      | 15455.707  |
| 14044 | HG1614-HT1614_at_NA_illumina   | Protein Phosphatase 1, Alpha Catalytic  | 15467.831  |
| 14045 | AA384503_s_at_GI_38327635-S    | EST: EST98057 Thyroid Homo sapiens      | 15469.543  |
| 14046 | J03779_at_GI_6042201-A         | MME Membrane metallo-endopeptidase      | 15471.224  |
| 14047 | M76378_at_GI_4758085-S         | FN1 Fibronectin 1                       | 15474.846  |
| 14048 | RC_AA448220_at_NA_illumina     | EST: zw96c03.s1 Soares total fetus      | 15488.486  |
| 14049 | T34377_at_NA_illumina          | EST: EST66741 Homo sapiens cDNA 5'      | 15512.876  |

|       |                                |                                         |           |
|-------|--------------------------------|-----------------------------------------|-----------|
| 14050 | S77356_at_GI_41327758-S        | Transcript ch21=oligomycin sensitivity  | 15520.624 |
| 14051 | D31887_at_NA_illumina          | KIAA0062 gene, partial cds              | 15551.33  |
| 14052 | RC_AA447155_at_NA_illumina     | Dihydropyrimidinase-like 2              | 15574.848 |
| 14053 | HG3492-HT3686_at_NA_illumina   | Uncoupling Protein Ucp                  | 15579.39  |
| 14054 | C14203_s_at_NA_illumina        | EST: Human fetal brain cDNA 5'-end GEN- | 15582.153 |
| 14055 | L00389_f_at_GI_13325061-S      | Cytochrome P-450 4 gene                 | 15586.52  |
| 14056 | RC_AA435612_at_NA_illumina     | FK506-binding protein 5                 | 15594.387 |
| 14057 | M30894_at_NA_illumina          | TCRG T cell receptor gamma chain        | 15599.12  |
| 14058 | J03910_rna1_at_GI_10835229-S   | (clone 14VS) metallothionein-IG (MT1G)  | 15603.361 |
| 14059 | X89399_s_at_NA_illumina        | Ins(1,3,4,5)P4-binding protein          | 15608.667 |
| 14060 | HG1862-HT1897_at_NA_illumina   | Calmodulin Type I                       | 15613.271 |
| 14061 | RC_AA435899_at_GI_24416001-S   | Homo sapiens mRNA for KIAA0462          | 15632.929 |
| 14062 | C02472_at_GI_5453997-S         | Homo sapiens RanBP7/importin 7 mRNA,    | 15635.215 |
| 14063 | RC_AA447964_at_GI_12232388-S   | EST: zv83h06.s1 Soares total fetus      | 15645.267 |
| 14064 | RC_AA256263_at_NA_illumina     | Homo sapiens clone 23930 mRNA           | 15646.825 |
| 14065 | RC_AA125808_at_GI_18104963-A   | EST: zl29e12.s1 Soares pregnant uterus  | 15662.308 |
| 14066 | RC_AA279020_at_GI_13775603-S   | EST: zs83a12.s1 NCI_CGAP_GCB1           | 15667.111 |
| 14067 | U72649_at_GI_28872718-S        | BTG2 (BTG2) mRNA                        | 15667.291 |
| 14068 | D86586_at_NA_illumina          | Stem cell growth factor; lymphocyte     | 15667.72  |
| 14069 | RC_AA347485_at_NA_illumina     | EST: EST53794 Fetal heart II Homo       | 15701.251 |
| 14070 | D43682_s_at_GI_4557234-S       | Very-long-chain acyl-CoA dehydrogenase  | 15721.366 |
| 14071 | X66785_i_at_NA_illumina        | Dihydrolipoamide branched chain         | 15723.416 |
| 14072 | D31091_at_GI_24308040-S        | EST: Human fetal-lung cDNA 5'-end       | 15724.018 |
| 14073 | X66785_f_at_NA_illumina        | Dihydrolipoamide branched chain         | 15724.568 |
| 14074 | RC_AA150210_at_NA_illumina     | EST: zl04g08.s1 Soares pregnant uterus  | 15729.108 |
| 14075 | AC002045_xpt2_s_at_NA_illumina | A-589H1.2 from Homo sapiens             | 15737.705 |
| 14076 | M62762_at_GI_19913436-S        | ATP6C Vacuolar H+ ATPase proton         | 15747.388 |
| 14077 | U85625_at_NA_illumina          | Ribonuclease 6 precursor                | 15779.927 |
| 14078 | RC_AA405293_at_NA_illumina     | EST: zu13g02.s1 Soares testis NHT Homo  | 15788.537 |
| 14079 | RC_AA425852_i_at_NA_illumina   | EST: zw47g11.s1 Soares total fetus      | 15798.082 |
| 14080 | RC_AA443114_at_NA_illumina     | EST: zx74c07.s1 Soares ovary tumor      | 15813.877 |
| 14081 | C02500_s_at_NA_illumina        | EST: HUMGS0012393, Human Gene           | 15814.335 |
| 14082 | RC_AA600363_at_GI_5174484-S    | Endocytic receptor (macrophage mannose  | 15815.484 |
| 14083 | RC_AA398221_at_GI_26051217-A   | EST: zt59e10.s1 Soares testis NHT Homo  | 15821.181 |
| 14084 | X67318_at_GI_4502996-S         | CPA1 Carboxypeptidase A1                | 15823.045 |
| 14085 | RC_AA279841_at_NA_illumina     | Homo sapiens mRNA for KIAA0906          | 15826.199 |
| 14086 | AA432034_s_at_NA_illumina      | EST: zw80e01.r1 Soares testis NHT Homo  | 15828.179 |
| 14087 | RC_AA426640_at_NA_illumina     | EST: zv47h07.s1 Soares ovary tumor      | 15850.791 |
| 14088 | RC_AA454599_s_at_NA_illumina   | EST: zx96b02.s1 Soares ovary tumor      | 15861.685 |
| 14089 | RC_AA191708_at_NA_illumina     | EST: zp82d10.s1 Stratagene HeLa cell s3 | 15867.791 |
| 14090 | M11717_rna1_at_GI_26787973-S   | Heat shock protein (hsp 70) gene        | 15868.727 |
| 14091 | RC_AA189083_at_GI_27734993-A   | EST: zq45b09.s1 Stratagene hNT neuron   | 15869.327 |
| 14092 | X97267_rna1_s_at_GI_5032004-S  | LPAP gene                               | 15871.048 |



|       |                                |                                          |           |
|-------|--------------------------------|------------------------------------------|-----------|
| 14093 | H61295_s_at_NA_illumina        | EST: yu40g11.r1 Homo sapiens cDNA        | 15884.287 |
| 14094 | RC_AA071562_at_NA_illumina     | Homo sapiens flotillin-1 mRNA, complete  | 15894.614 |
| 14095 | RC_AA402656_at_NA_illumina     | EST: zu49e06.s1 Soares ovary tumor       | 15904.253 |
| 14096 | RC_AA195031_at_NA_illumina     | EST: zr35f08.s1 Soares NhHMPu S1         | 15909.805 |
| 14097 | M34379_s_at_NA_illumina        | Elastase 2, neutrophil                   | 15912.805 |
| 14098 | RC_AA348198_at_NA_illumina     | Gamma-aminobutyric acid (GABA) B         | 15933.456 |
| 14099 | D90209_at_GI_33469973-A        | ATF4 CAMP-dependent transcription        | 15945.411 |
| 14100 | Z69043_s_at_GI_5454089-S       | mRNA translocon-associated protein delta | 15952.859 |
| 14101 | L14813_at_NA_illumina          | CELL Carboxyl ester lipase like protein  | 15973.347 |
| 14102 | D52791_at_GI_22547192-A        | Human clone iota unknown protein mRNA,   | 15988.972 |
| 14103 | D79052_s_at_GI_14591933-S      | EST: Human placenta cDNA 5'-end GEN-     | 15989.627 |
| 14104 | X05610_at_NA_illumina          | COL4A2 Collagen, type IV, alpha 2        | 15991.073 |
| 14105 | D52818_s_at_GI_4758271-S       | Endosulfine alpha                        | 15993.915 |
| 14106 | RC_AA149833_at_NA_illumina     | EST: zl47e11.s1 Soares pregnant uterus   | 16000.898 |
| 14107 | RC_AA443756_at_GI_13899218-S   | EST: zw95d04.s1 Soares total fetus       | 16003.488 |
| 14108 | J00124_at_GI_15431309-S        | KERATIN, TYPE I CYTOSKELETAL 14          | 16013.802 |
| 14109 | X71973_at_GI_4504106-S         | GPX4 Phospholipid hydroperoxide          | 16016.913 |
| 14110 | HG1877-HT1917_s_at_NA_illumina | Myelin Basic Protein, Alt. Splice Form 4 | 16018.239 |
| 14111 | M54915_s_at_NA_illumina        | PIM1 Pim-1 oncogene                      | 16020.042 |
| 14112 | RC_AA476355_s_at_NA_illumina   | EST: zw99e11.s1 Soares total fetus       | 16028.674 |
| 14113 | RC_AA412476_at_GI_8923597-S    | EST: zt95g09.s1 Soares testis NHT Homo   | 16042.795 |
| 14114 | X54667_at_NA_illumina          | CST4 Cystatin S                          | 16044.792 |
| 14115 | X54667_s_at_NA_illumina        | CST4 Cystatin S                          | 16047.263 |
| 14116 | X81817_at_GI_32171185-S        | 6C6-Ag mRNA                              | 16064.815 |
| 14117 | AF005038_at_NA_illumina        | Secretory carrier membrane protein 2     | 16067.426 |
| 14118 | Z15115_at_NA_illumina          | TOP2B Topoisomerase (DNA) II beta        | 16068.958 |
| 14119 | RC_AA478727_at_NA_illumina     | EST: zv14d10.s1 Soares NhHMPu S1         | 16070.311 |
| 14120 | AA477978_s_at_GI_34222303-S    | Short-chain dehydrogenase/reductase 1    | 16087.184 |
| 14121 | AA431829_s_at_NA_illumina      | HEAT SHOCK 70 KD PROTEIN 1               | 16130.936 |
| 14122 | AA085463_at_NA_illumina        | Tropomyosin 4                            | 16143.257 |
| 14123 | U10323_at_GI_24234746-S        | Nuclear factor NF45 mRNA                 | 16151.283 |
| 14124 | M34182_at_GI_15619014-S        | CAMP-DEPENDENT PROTEIN KINASE,           | 16162.486 |
| 14125 | RC_AA086480_at_NA_illumina     | EST: zl83d11.s1 Stratagene colon         | 16163.927 |
| 14126 | AA436202_at_NA_illumina        | EST: zv23g01.r1 Soares NhHMPu S1         | 16174.293 |
| 14127 | RC_AA122332_at_GI_22027539-S   | Programmed cell death 6                  | 16180.886 |
| 14128 | U09813_at_GI_4502300-S         | Mitochondrial ATP synthase subunit 9, P3 | 16182.7   |
| 14129 | M29873_s_at_NA_illumina        | Human cytochrome P450-IIB (hIIB3)        | 16186.031 |
| 14130 | U60644_at_GI_7110640-S         | HU-K4 mRNA                               | 16211.613 |
| 14131 | AA486831_s_at_NA_illumina      | KIAA0618 gene product                    | 16216.449 |
| 14132 | RC_AA286906_at_NA_illumina     | EST: zs56a08.s1 NCI_CGAP_GCB1            | 16220.84  |
| 14133 | X70944_s_at_GI_4826997-S       | PTB-ASSOCIATED SPLICING FACTOR           | 16223.455 |
| 14134 | X70944_s_at-2_NA_illumina      | Splicing factor proline/glutamine rich   | 16223.455 |
| 14135 | RC_AA071089_at_NA_illumina     | EST: zm66c09.s1 Stratagene               | 16229.618 |

|       |                                |                                          |           |
|-------|--------------------------------|------------------------------------------|-----------|
| 14136 | AA436926_at_GI_31881756-S      | EST: zv72a04.r1 Soares total fetus       | 16232.956 |
| 14137 | K03515_at_GI_18201904-S        | GPI Glucose phosphate isomerase          | 16234.05  |
| 14138 | RC_AA251014_at_NA_illumina     | EST: zs02g08.s1 NCI_CGAP_GCB1            | 16234.57  |
| 14139 | C00350_f_at_GI_21735608-A      | Ribosomal protein L33-like               | 16236.056 |
| 14140 | M29277_at_NA_illumina          | CELL SURFACE GLYCOPROTEIN                | 16236.758 |
| 14141 | M32053_at_NA_illumina          | H19 RNA gene                             | 16251.739 |
| 14142 | M83667_rna1_s_at_GI_28872797-S | NF-IL6-beta protein mRNA                 | 16261.116 |
| 14143 | X77584_at_GI_4507744-S         | TXN Thioredoxin                          | 16264.183 |
| 14144 | X86809_at_GI_21359835-S        | Major astrocytic phosphoprotein PEA-15   | 16267.878 |
| 14145 | HG3342-HT3519_s_at_NA_illumina | Id1                                      | 16278.792 |
| 14146 | RC_AA055048_at_NA_illumina     | EST: zf19b01.s1 Soares fetal heart       | 16282.154 |
| 14147 | J03909_at_GI_29826337-S        | GAMMA-INTERFERON-INDUCIBLE               | 16283.763 |
| 14148 | RC_AA279420_at_GI_6912653-S    | EST: zs85d09.s1 NCI_CGAP_GCB1            | 16291.973 |
| 14149 | RC_AA348412_at_NA_illumina     | EST: EST54858 Hippocampus II Homo        | 16292.404 |
| 14150 | RC_AA406631_r_at_GI_40806198-A | EST: zv15d12.s1 Soares NhHMPu S1         | 16297.852 |
| 14151 | RC_AA158251_at_GI_24496766-S   | Human growth factor-regulated tyrosine   | 16299.206 |
| 14152 | D29963_at_GI_34328914-A        | Platelet-endothelial tetraspan antigen 3 | 16328.165 |
| 14153 | X13238_at_GI_17999531-S        | COX6C Cytochrome c oxidase subunit VIc   | 16360.174 |
| 14154 | RC_AA478590_at_NA_illumina     | EST: zv14c07.s1 Soares NhHMPu S1         | 16371.061 |
| 14155 | RC_AA443791_f_at_GI_30026033-S | EST: zw86e09.s1 Soares total fetus       | 16371.52  |
| 14156 | D61380_at_GI_34222306-S        | DJ-1 protein                             | 16391.807 |
| 14157 | AA400964_at_GI_32140759-S      | EST: zu50b07.r1 Soares ovary tumor       | 16417.576 |
| 14158 | RC_AA243721_at_NA_illumina     | EST: zr68f11.s1 Soares NhHMPu S1         | 16418.043 |
| 14159 | W27330_at_NA_illumina          | EST: 27e8 Human retina cDNA randomly     | 16435.324 |
| 14160 | X86693_at_GI_21359870-S        | High endothelial venule                  | 16456.707 |
| 14161 | U94855_at_GI_4503518-S         | Translation initiation factor 3 47 kDa   | 16457.098 |
| 14162 | J04130_s_at_GI_4506844-S       | SCYA4 Small inducible cytokine A4        | 16466.795 |
| 14163 | L11672_r_at_NA_illumina        | ZNF91 Zinc finger protein 91 (HPF7,      | 16479.76  |
| 14164 | W20094_at_NA_illumina          | EST: zb39d09.r1 Soares parathyroid tumor | 16512.936 |
| 14165 | RC_AA504801_at_NA_illumina     | Homo sapiens mRNA for KIAA0788           | 16520.62  |
| 14166 | U01317_cds4_at_GI_6633803-S    | Delta-globin gene extracted from Human   | 16543.037 |
| 14167 | D82348_at_GI_39725714-S        | 5-aminoimidazole-4-carboxamide-1-beta-D- | 16549.656 |
| 14168 | D82348_at-2_NA_illumina        | Homo sapiens mRNA for 5-                 | 16549.656 |
| 14169 | X59892_at_GI_7710155-S         | TRYPTOPHANYL-TRNA SYNTHETASE             | 16563.887 |
| 14170 | RC_AA480991_s_at_GI_41352717-  | EST: aa28h02.s1 NCI_CGAP_GCB1            | 16574.55  |
| 14171 | RC_AA447977_s_at_NA_illumina   | EST: zw82e09.s1 Soares testis NHT        | 16584.482 |
| 14172 | Z29505_at_GI_14141164-S        | Alpha-CP1 mRNA                           | 16585.062 |
| 14173 | AA071387_at_GI_38455406-S      | Homo sapiens hJTB mRNA, complete cds     | 16585.418 |
| 14174 | W24319_at_NA_illumina          | EST: zb81b11.r1 Soares senescent         | 16586.736 |
| 14175 | U56637_at_GI_5453596-S         | Capping protein alpha subunit isoform 1  | 16587.812 |
| 14176 | M31303_rna1_at_GI_44889961-A   | Oncoprotein 18 (Op18) gene               | 16590.797 |
| 14177 | RC_AA452245_s_at_NA_illumina   | EST: zx15f06.s1 Soares total fetus       | 16595.602 |
| 14178 | RC_AA455267_at_NA_illumina     | EST: zx80a02.s1 Soares ovary tumor       | 16597.94  |

|       |                                |                                              |           |
|-------|--------------------------------|----------------------------------------------|-----------|
| 14179 | N75870_s_at_NA_illumina        | Dual specificity phosphatase 1               | 16620.42  |
| 14180 | RC_AA236451_at_NA_illumina     | EST: zr75f01.s1 Soares NhHMPu S1             | 16647.455 |
| 14181 | L08246_at_GI_33519457-A        | INDUCED MYELOID LEUKEMIA CELL                | 16648.393 |
| 14182 | Z24727_at_NA_illumina          | TPM1 Tropomyosin alpha chain (skeletal       | 16650.982 |
| 14183 | U24105_at_GI_6996002-S         | Coatomer protein (COPA) mRNA                 | 16672.309 |
| 14184 | RC_AA442253_at_GI_32171176-S   | EST: zv61g10.s1 Soares testis NHT Homo       | 16684.6   |
| 14185 | RC_AA424033_at_GI_30474870-A   | H.sapiens mRNA for serine                    | 16701.922 |
| 14186 | RC_AA478017_at_GI_40789263-S   | Homo sapiens alpha 1,2-mannosidase IB        | 16722.365 |
| 14187 | RC_AA482613_at_NA_illumina     | EST: zt34e11.s1 Soares ovary tumor           | 16731.875 |
| 14188 | RC_AA256459_at_NA_illumina     | EST: zr81a02.s1 Soares NhHMPu S1             | 16739.018 |
| 14189 | K02405_f_at_GI_24797068-S      | HLA CLASS II HISTOCOMPATIBILITY              | 16745.896 |
| 14190 | H88033_s_at_NA_illumina        | Homo sapiens mRNA for KIAA0733               | 16750.275 |
| 14191 | Z74616_s_at_NA_illumina        | COL1A2 Collagen, type I, alpha-2             | 16750.713 |
| 14192 | HG1872-HT1907_at_NA_illumina   | Major Histocompatibility Complex, Dg         | 16756.705 |
| 14193 | RC_AA488074_at_NA_illumina     | Cell division cycle 42 (GTP-binding protein, | 16758.996 |
| 14194 | HG3437-HT3628_s_at_NA_illumina | Myelin Proteolipid Protein, Alt. Splice 2    | 16777.926 |
| 14195 | RC_AA279162_s_at_NA_illumina   | Homo sapiens heterogeneous nuclear           | 16779.83  |
| 14196 | T89812_at_NA_illumina          | Aquaporin 4                                  | 16807.656 |
| 14197 | M34996_s_at_NA_illumina        | MHC cell surface glycoprotein (HLA-DQA)      | 16812.568 |
| 14198 | M13955_at_GI_30089955-S        | Mesothelial keratin K7 (type II) mRNA, 3'    | 16816.04  |
| 14199 | RC_AA488889_at_GI_36054140-S   | EST: aa55g04.s1 NCI_CGAP_GCB1                | 16823.18  |
| 14200 | U61849_r_at_NA_illumina        | Neuronal pentraxin I                         | 16837.838 |
| 14201 | RC_AA488178_at_NA_illumina     | EST: ad08c04.s1 Soares NbHFB Homo            | 16838.129 |
| 14202 | RC_AA215585_s_at_NA_illumina   | Homo sapiens clone 486790                    | 16839.787 |
| 14203 | U89922_s_at_GI_6996015-A       | LTB Lymphotoxin-beta                         | 16843.182 |
| 14204 | AA157428_at_GI_18105041-A      | KIAA0571 gene product                        | 16862.736 |
| 14205 | RC_AA256680_at_NA_illumina     | EST: zr82h09.s1 Soares NhHMPu S1             | 16868.988 |
| 14206 | N94832_at_NA_illumina          | EST: yy63f07.r1 Homo sapiens cDNA            | 16870.37  |
| 14207 | RC_AA450045_at_GI_20127485-S   | Homo sapiens cargo selection protein         | 16885.754 |
| 14208 | RC_AA350690_at_NA_illumina     | Homo sapiens mRNA for KIAA0916               | 16923.709 |
| 14209 | RC_AA404597_at_GI_39930540-S   | EST: zt43d03.s1 Soares ovary tumor           | 16951.29  |
| 14210 | HG3076-HT3238_s_at_NA_illumina | Heterogeneous Nuclear Ribonucleoprotein      | 16971.66  |
| 14211 | RC_AA495918_at_NA_illumina     | EST: zw05g09.s1 Soares NhHMPu S1             | 16972.1   |
| 14212 | M21624_at_NA_illumina          | TCRD T-cell receptor, delta                  | 16978.371 |
| 14213 | RC_AA134289_at_NA_illumina     | EST: zo21g12.s1 Stratagene colon             | 16979.361 |
| 14214 | RC_AA213410_at_GI_38569403-S   | EST: zr91h04.s1 NCI_CGAP_GCB1 Homo           | 16982.863 |
| 14215 | M58028_at_GI_23510339-A        | UBE1 Ubiquitin activating enzyme E1          | 16990.88  |
| 14216 | RC_AA398892_at_GI_34147386-S   | EST: zt62g12.s1 Soares testis NHT Homo       | 16999.836 |
| 14217 | N81162_at_GI_16933550-A        | EST: yw36d01.r1 Homo sapiens cDNA            | 17001.828 |
| 14218 | RC_AA491463_at_NA_illumina     | EST: ab01d12.s1 Stratagene fetal retina      | 17003.912 |
| 14219 | AA329274_f_at_NA_illumina      | Protein tyrosine phosphatase type IVA,       | 17021.996 |
| 14220 | RC_AA455630_at_NA_illumina     | EST: aa22b01.s1 NCI_CGAP_GCB1                | 17024.111 |
| 14221 | X02317_at_GI_40255241-S        | SOD1 Superoxide dismutase 1 (Cu/Zn)          | 17030.238 |

|       |                              |                                            |           |
|-------|------------------------------|--------------------------------------------|-----------|
| 14222 | M91036_rna1_at_NA_illumina   | G-gamma globin gene extracted from         | 17086.137 |
| 14223 | AA176272_at_NA_illumina      | Homo sapiens pt-wd mRNA for WD-40          | 17092.57  |
| 14224 | U05259_rna1_at_GI_11038671-A | MB-1 gene                                  | 17141.752 |
| 14225 | D83847_f_at_GI_6679624-S     | ELASTASE IIIB PRECURSOR                    | 17162.564 |
| 14226 | X59834_at_GI_21361767-S      | GLUL Glutamate-ammonia ligase              | 17162.738 |
| 14227 | X92744_at_GI_13124884-S      | BETA-DEFENSIN 1 PRECURSOR                  | 17164.277 |
| 14228 | W28214_at_NA_illumina        | EST: 45f7 Human retina cDNA randomly       | 17165.957 |
| 14229 | U50523_at_GI_23238209-A      | BRCA2 region, mRNA sequence CG037          | 17168.082 |
| 14230 | AA243486_at_NA_illumina      | EST: zs15c05.r1 NCI_CGAP_GCB1 Homo         | 17198.441 |
| 14231 | RC_AA004274_at_NA_illumina   | EST: zh97f02.s1 Soares fetal liver spleen  | 17202.41  |
| 14232 | RC_AA486890_f_at_NA_illumina | EST: ab17g09.s1 Stratagene lung            | 17204.338 |
| 14233 | L20814_at-2_NA_illumina      | Glutamate receptor, ionotropic, AMPA 2     | 17212.283 |
| 14234 | L20814_at_GI_4758479-S       | GRIA2 Glutamate receptor, ionotropic,      | 17212.283 |
| 14235 | RC_AA609060_at_NA_illumina   | EST: af10g04.s1 Soares testis NHT Homo     | 17213.125 |
| 14236 | U46692_rna1_at_GI_20357564-S | Cystatin B gene                            | 17214.42  |
| 14237 | U94586_at_GI_33519463-S      | NADH:ubiquinone oxidoreductase MLRQ        | 17231.344 |
| 14238 | M62403_s_at_GI_10835020-S    | IGFBP4 Insulin-like growth factor-binding  | 17239.924 |
| 14239 | X76180_at_GI_40556387-S      | SLC9A1 Solute carrier family 9             | 17272.223 |
| 14240 | X62083_s_at_NA_illumina      | RING3 PROTEIN                              | 17275.938 |
| 14241 | X89267_at_NA_illumina        | UROD Uroporphyrinogen decarboxylase        | 17284.643 |
| 14242 | X64177_f_at_GI_10835084-S    | Metallothionein                            | 17284.73  |
| 14243 | U45973_at_GI_18765706-I      | Phosphatidylinositol (4,5)bisphosphate 5-  | 17307.588 |
| 14244 | U45973_at-2_NA_illumina      | Human phosphatidylinositol                 | 17307.588 |
| 14245 | AA384184_s_at_GI_20070259-S  | EST: EST97722 Thyroid Homo sapiens         | 17307.693 |
| 14246 | W73285_at_NA_illumina        | EST: zd56c09.r1 Soares fetal heart         | 17331.834 |
| 14247 | RC_AA236455_r_at_NA_illumina | EST: zr75g02.s1 Soares NhHMPu S1           | 17376.758 |
| 14248 | M23323_s_at_GI_4502670-S     | T-CELL SURFACE GLYCOPROTEIN CD3            | 17432.65  |
| 14249 | AA150851_s_at_NA_illumina    | EST: zl44b04.r1 Soares pregnant uterus     | 17435.684 |
| 14250 | AA236324_at_GI_40317631-S    | EST: zr51d07.r1 Soares NhHMPu S1           | 17437.02  |
| 14251 | RC_AA398521_at_NA_illumina   | EST: zt47d09.s1 Soares ovary tumor         | 17495.422 |
| 14252 | X04106_at_GI_4502564-S       | CAPN4 Calpain, small polypeptide           | 17499.576 |
| 14253 | H44386_s_at_NA_illumina      | EST: yp18h11.r1 Homo sapiens cDNA          | 17548.309 |
| 14254 | RC_AA436690_at_NA_illumina   | EST: zv59b04.s1 Soares testis NHT Homo     | 17577.75  |
| 14255 | D78134_at_GI_4502846-S       | YWHAZ Tyrosine 3-                          | 17580.701 |
| 14256 | RC_AA457528_at_GI_11141890-S | EST: aa89e07.s1 Stratagene fetal retina    | 17596.684 |
| 14257 | D38583_at_GI_5032056-S       | Calgizzarin                                | 17599.064 |
| 14258 | RC_AA425782_at_GI_40556371-S | Homo sapiens mRNA for KIAA0874             | 17601.857 |
| 14259 | RC_AA142911_at_NA_illumina   | Tubulin-specific chaperone a               | 17605.625 |
| 14260 | C01409_s_at_NA_illumina      | EST: HUMGS0008391, Human Gene              | 17608.598 |
| 14261 | RC_AA405540_at_NA_illumina   | EST: zw39b10.s1 Soares total fetus         | 17633.102 |
| 14262 | D13639_at_GI_16950656-S      | CCND2 Cyclin D2                            | 17637.83  |
| 14263 | RC_D60607_at_NA_illumina     | EST: Human fetal brain cDNA 3'-end GEN-    | 17671.441 |
| 14264 | M80627_s_at_NA_illumina      | Transcription factor 12 (HTF4, helix-loop- | 17746.979 |

|       |                                |                                           |           |
|-------|--------------------------------|-------------------------------------------|-----------|
| 14265 | RC_AA599434_at_NA_illumina     | EST: ag23d09.s1 Jia bone marrow stroma    | 17753.643 |
| 14266 | RC_AA450202_s_at_GI_29789059-  | KIAA0528 gene product                     | 17774.383 |
| 14267 | W26996_at_NA_illumina          | EST: 20f9 Human retina cDNA randomly      | 17790.861 |
| 14268 | RC_AA255440_at_NA_illumina     | EST: zr83f05.s1 Soares NhHMPu S1          | 17806.201 |
| 14269 | T35725_s_at_NA_illumina        | EST: EST90142 Homo sapiens cDNA 5'        | 17814.777 |
| 14270 | RC_AA401098_f_at_NA_illumina   | EST: zu50g01.s1 Soares ovary tumor        | 17835.943 |
| 14271 | RC_AA252172_at_GI_7706116-S    | EST: zr64d03.s1 Soares NhHMPu S1          | 17864.66  |
| 14272 | RC_AA152103_at_GI_39753951-S   | Human Chromosome 16 BAC clone             | 17869.607 |
| 14273 | AB004066_at_GI_4503298-S       | Differentiated Embryo Chondrocyte         | 17882.615 |
| 14274 | U75272_s_at_GI_4505756-S       | PGC Gastricsin (pepsinogen C)             | 17911.266 |
| 14275 | RC_AA235819_at_GI_34147397-S   | EST: zs05d03.s1 NCI_CGAP_GCB1             | 17927.451 |
| 14276 | RC_AA448292_at_NA_illumina     | EST: zw96e09.s1 Soares total fetus        | 17952.37  |
| 14277 | RC_AA488843_at_GI_5031638-S    | EST: aa55a10.s1 NCI_CGAP_GCB1             | 17964.568 |
| 14278 | W95348_at_NA_illumina          | EST: ze06b01.r1 Soares fetal heart        | 17970.602 |
| 14279 | M30448_s_at_GI_12056464-S      | Casein kinase II beta subunit mRNA        | 18001.98  |
| 14280 | AA313677_at_GI_23110945-A      | Proteasome (prosome, macropain)           | 18023.697 |
| 14281 | M74491_at_GI_4502202-S         | ARF3 ADP-ribosylation factor 3            | 18030.773 |
| 14282 | L09604_at_GI_4505892-S         | INTESTINAL MEMBRANE A4 PROTEIN            | 18039.496 |
| 14283 | X68688_rna1_s_at_NA_illumina   | ZNF33B gene                               | 18051.697 |
| 14284 | X68688_rna1_s_at-2_NA_illumina | H.sapiens ZNF33B gene                     | 18051.697 |
| 14285 | U67171_at_GI_42544245-S        | Selenoprotein W (selW) mRNA               | 18054.613 |
| 14286 | X16832_at_GI_23110956-A        | CTSH Cathepsin H                          | 18057.008 |
| 14287 | R73164_at_NA_illumina          | EST: yj91a03.r1 Homo sapiens cDNA         | 18059.842 |
| 14288 | RC_AA427924_at_GI_24307904-S   | Homo sapiens mRNA for KIAA0762            | 18071.428 |
| 14289 | C02143_s_at_GI_8923736-S       | EST: HUMGS0006474, Human Gene             | 18080.264 |
| 14290 | AA393317_at_NA_illumina        | Neuroblastoma RAS viral (v-ras) oncogene  | 18102.84  |
| 14291 | D13900_at_GI_12707569-S        | Mitochondrial short-chain enoyl-CoA       | 18132.01  |
| 14292 | RC_AA430496_f_at_NA_illumina   | Ferritin, light polypeptide               | 18150.47  |
| 14293 | L11015_s_at_NA_illumina        | Lymphotoxin beta (TNF superfamily,        | 18156.793 |
| 14294 | M12125_at_GI_42476295-S        | Skeletal beta-tropomyosin                 | 18171.947 |
| 14295 | U03057_at_GI_4507114-S         | Actin bundling protein mRNA               | 18183.543 |
| 14296 | RC_AA005135_at_NA_illumina     | EST: zh95e02.s1 Soares fetal liver spleen | 18202.096 |
| 14297 | D16562_at_GI_4885078-S         | ATP SYNTHASE GAMMA CHAIN,                 | 18240.035 |
| 14298 | N87590_at_GI_13430859-S        | EST: LL2070F Fetal heart, Lambda ZAP      | 18244.797 |
| 14299 | W72770_s_at_NA_illumina        | EST: zd77c10.r1 Soares fetal heart        | 18245.854 |
| 14300 | RC_AA620899_at_GI_41872428-S   | Homo sapiens clone 24684 mRNA             | 18278.623 |
| 14301 | AA093923_at_NA_illumina        | Tissue inhibitor of metalloproteinase 2   | 18281.246 |
| 14302 | U37690_at_GI_45359860-S        | RNA polymerase II subunit (hsRPB10)       | 18311.576 |
| 14303 | M13577_at_GI_4505122-S         | MBP Myelin basic protein                  | 18335.197 |
| 14304 | RC_AA424791_at_NA_illumina     | EST: zw03a04.s1 Soares NhHMPu S1          | 18345.344 |
| 14305 | RC_AA280608_s_at_GI_34222320-  | EST: zs89f02.s1 NCI_CGAP_GCB1 Homo        | 18361.744 |
| 14306 | U66711_rna1_s_at_GI_4505048-S  | Ly-6-related protein (9804) gene          | 18362.902 |
| 14307 | AA419178_s_at_GI_25470885-A    | EST: zv34g07.r1 Soares ovary tumor        | 18366.195 |

|       |                              |                                           |           |
|-------|------------------------------|-------------------------------------------|-----------|
| 14308 | W76181_at_GI_32171239-S      | NADH dehydrogenase (ubiquinone) 1         | 18372.564 |
| 14309 | RC_AA287393_at_GI_34222379-S | EST: zs50f09.s1 NCI_CGAP_GCB1 Homo        | 18375.117 |
| 14310 | RC_AA113363_at_GI_42658173-S | Homo sapiens mRNA for KIAA0810            | 18403.953 |
| 14311 | RC_AA497015_at_NA_illumina   | Homo sapiens mRNA for Epsilon COP         | 18408.744 |
| 14312 | RC_AA235803_i_at_NA_illumina | EST: zs42g06.s1 Soares NhHMPu S1          | 18409.715 |
| 14313 | U46025_at_GI_5579457-S       | Chromosome 16p11.2 BAC Clone              | 18410.762 |
| 14314 | RC_AA432057_at_GI_41327788-I | EST: zw89a06.s1 Soares total fetus        | 18433.758 |
| 14315 | RC_AA173423_at_NA_illumina   | EST: zp02d07.s1 Stratagene ovarian        | 18435.44  |
| 14316 | RC_AA452928_at_GI_40255244-S | EST: zx41h05.s1 Soares total fetus        | 18443.219 |
| 14317 | RC_AA443303_s_at_NA_illumina | EST: zw94b07.s1 Soares total fetus        | 18451.486 |
| 14318 | AA046674_at_NA_illumina      | EST: zf12d12.r1 Soares fetal heart        | 18459.215 |
| 14319 | L49169_at_GI_5803016-S       | G0S3 mRNA                                 | 18466.523 |
| 14320 | L12168_at_GI_10938021-S      | ADENYLYL CYCLASE-ASSOCIATED               | 18469.064 |
| 14321 | RC_AA256149_at_NA_illumina   | Homo sapiens Chromosome 16 BAC clone      | 18470.299 |
| 14322 | R69700_at_GI_24797083-S      | EST: yi45a03.r1 Homo sapiens cDNA         | 18474.463 |
| 14323 | RC_AA451685_at_NA_illumina   | Human splicing factor SRp55-1 (SRp-55)    | 18479.984 |
| 14324 | M55513_s_at-2_NA_illumina    | Potassium voltage-gated channel, shaker-  | 18530.873 |
| 14325 | M55513_s_at_GI_25952086-S    | KCNA5 Potassium voltage-gated channel,    | 18530.873 |
| 14326 | RC_AA182568_at_GI_21536304-S | STAT induced STAT inhibitor-2             | 18531.742 |
| 14327 | M57466_s_at_GI_24797075-S    | MHC class II HLA-DP light chain mRNA      | 18550.826 |
| 14328 | RC_D52827_f_at_NA_illumina   | EST: Human fetal brain cDNA 3'-end GEN-   | 18558.56  |
| 14329 | L07633_at_GI_30581139-A      | INTERFERON GAMMA UP-REGULATED             | 18580.127 |
| 14330 | M80563_at_GI_9845515-A       | PLACENTAL CALCIUM-BINDING                 | 18580.244 |
| 14331 | RC_AA423991_at_NA_illumina   | EST: zv79h06.s1 Soares total fetus        | 18595.83  |
| 14332 | S65738_at_GI_6466447-S       | Actin depolymerizing factor [human, fetal | 18637.115 |
| 14333 | X62320_at_GI_4504150-S       | GRN Granulin                              | 18651.225 |
| 14334 | M97676_at-2_NA_illumina      | Msh (Drosophila) homeo box homolog 1      | 18708.09  |
| 14335 | M97676_at_NA_illumina        | MSX1 Msh (Drosophila) homeo box           | 18708.09  |
| 14336 | RC_AA446964_at_GI_29893565-S | Homo sapiens prostate stem cell antigen   | 18712.805 |
| 14337 | X04500_at_GI_27894305-S      | IL1B Interleukin 1, beta                  | 18721.123 |
| 14338 | D78577_s_at_GI_21464102-S    | YWHAH Tyrosine 3-                         | 18750.447 |
| 14339 | AA028195_at_GI_24497593-A    | Dolichyl-phosphate mannosyltransferase    | 18818.518 |
| 14340 | X57351_at_NA_illumina        | RPS3 Ribosomal protein S3                 | 18849.355 |
| 14341 | M63509_s_at_NA_illumina      | Glutathione S-transferase M2 (muscle)     | 18851.531 |
| 14342 | L13210_at_GI_6006016-S       | Mac-2 binding protein mRNA                | 18859.412 |
| 14343 | RC_AA176233_at_NA_illumina   | EST: zp08d05.s1 Stratagene ovarian        | 18908.7   |
| 14344 | M81840_s_at_NA_illumina      | Human leucine zipper on the D14S46E       | 18924.623 |
| 14345 | M92287_at_GI_16950657-S      | CCND3 Cyclin D3                           | 18930.229 |
| 14346 | M93119_s_at_NA_illumina      | Insulinoma-associated 1 (symbol           | 18940.496 |
| 14347 | X68733_rna1_at_GI_9665246-S  | Alpha1-antichymotrypsin, exon 1           | 18960.992 |
| 14348 | W32305_f_at_NA_illumina      | EST: zc67a06.r1 Soares fetal heart        | 18972.396 |
| 14349 | RC_AA455108_at_GI_27374999-S | Homo sapiens mRNA for GEF-2 protein       | 18977.277 |
| 14350 | R90942_at_NA_illumina        | EST: yp92b03.r1 Homo sapiens cDNA         | 18992.342 |

|       |                               |                                               |           |
|-------|-------------------------------|-----------------------------------------------|-----------|
| 14351 | D00749_s_at_GI_32130537-S     | T-CELL ANTIGEN CD7 PRECURSOR                  | 18993.967 |
| 14352 | X67698_at_GI_29171756-S       | Tissue specific mRNA                          | 19022.945 |
| 14353 | J05412_at_GI_30181229-S       | REG1A Regenerating islet-derived 1 alpha      | 19061.367 |
| 14354 | M84739_at_GI_5921996-S        | CALR Autoantigen calreticulin                 | 19076.7   |
| 14355 | AA215919_at_GI_15812192-S     | Human DNA sequence from clone 149A16          | 19080.938 |
| 14356 | J04615_at_NA_illumina         | SNRPN Small nuclear ribonucleoprotein         | 19085.264 |
| 14357 | RC_AA398438_at_NA_illumina    | EST: zt62e01.s1 Soares testis NHT Homo        | 19098.83  |
| 14358 | AA279561_at_GI_21464122-S     | EST: zs92a09.r1 NCI_CGAP_GCB1 Homo            | 19103.553 |
| 14359 | AB002311_at_NA_illumina       | KIAA0313 gene product                         | 19138.89  |
| 14360 | RC_AA479488_at_NA_illumina    | Homo sapiens clone 23931 mRNA, partial        | 19179.78  |
| 14361 | RC_AA232104_at_NA_illumina    | EST: zr28a03.s1 Stratagene NT2 neuronal       | 19186.096 |
| 14362 | AA094507_s_at_GI_32484986-S   | EST: cp0543.seq.F Fetal heart, Lambda         | 19186.434 |
| 14363 | U41635_at_NA_illumina         | OS-9 precurosor mRNA                          | 19211.906 |
| 14364 | C02016_at_GI_33469136-A       | KIAA0447 gene product                         | 19214.195 |
| 14365 | D13118_at_GI_4885080-S        | ATP SYNTHASE LIPID-BINDING                    | 19218.88  |
| 14366 | RC_AA398167_at_GI_23065568-S  | Glutathione S-transferase A4                  | 19219.129 |
| 14367 | U36764_at_GI_4503512-S        | EIF3 Eukaryotic translation initiation factor | 19247.783 |
| 14368 | U36764_at-2_NA_illumina       | Eukaryotic translation initiation factor 3,   | 19247.783 |
| 14369 | D23673_at_GI_32880194-S       | mRNA, clone HH109 (screened by the            | 19249.123 |
| 14370 | D23673_at-2_NA_illumina       | Homo sapiens mRNA for KIAA0864                | 19249.123 |
| 14371 | U62962_at_GI_4503520-S        | Int-6 mRNA                                    | 19325.266 |
| 14372 | AA127183_s_at_GI_38201676-S   | Homo sapiens antigen NY-CO-33 (NY-CO-         | 19348.246 |
| 14373 | U61849_s_at_NA_illumina       | Neuronal pentraxin I                          | 19364.314 |
| 14374 | X59417_at_GI_23110943-S       | PROTEASOME IOTA CHAIN                         | 19368.246 |
| 14375 | U73824_at_GI_4503538-S        | P97 mRNA                                      | 19376.648 |
| 14376 | RC_AA262710_s_at_GI_37550031- | Homo sapiens mRNA for KIAA0627                | 19382.9   |
| 14377 | L29008_at_GI_34147623-S       | SORD Sorbitol dehydrogenase                   | 19396.11  |
| 14378 | X82456_at_GI_5453709-S        | MLN50 mRNA                                    | 19419.32  |
| 14379 | M24400_at_NA_illumina         | CTRB1 Chymotrypsinogen B1                     | 19420.508 |
| 14380 | AA477600_at_GI_6005923-S      | EST: zu44f01.r1 Soares ovary tumor            | 19424.936 |
| 14381 | AA436315_at_GI_42519914-A     | EST: zv22e11.r1 Soares NhHMPu S1              | 19428.17  |
| 14382 | RC_AA465212_i_at_NA_illumina  | Human tip associating protein (TAP)           | 19441.33  |
| 14383 | D45370_at_NA_illumina         | ApM2 mRNA for GS2374 (unknown                 | 19449.43  |
| 14384 | M18700_s_at_NA_illumina       | ELASTASE IIIA PRECURSOR                       | 19464.438 |
| 14385 | L19605_at_GI_22165429-A       | ANX11 Annexin XI (56kD autoantigen)           | 19486.66  |
| 14386 | M25280_at_GI_5713320-S        | SELL Selectin L (lymphocyte adhesion          | 19500.541 |
| 14387 | RC_AA460849_at_NA_illumina    | EST: zx64h08.s1 Soares total fetus            | 19519.78  |
| 14388 | U07857_at_GI_31543652-S       | SRP14 Signal recognition particle 14 kD       | 19521.883 |
| 14389 | X17567_s_at_GI_38150006-A     | SNRPB Small nuclear ribonucleoprotein         | 19536.26  |
| 14390 | M12759_at-2_NA_illumina       | Human Ig J chain gene                         | 19542.926 |
| 14391 | M12759_at_GI_32189367-S       | IMMUNOGLOBULIN J CHAIN                        | 19542.926 |
| 14392 | C02044_s_at_NA_illumina       | EST: HUMGS0005345, Human Gene                 | 19585.06  |
| 14393 | M22382_at_GI_41399283-A       | HSPD1 Heat shock 60 kD protein 1              | 19628.932 |

|       |                                |                                             |           |
|-------|--------------------------------|---------------------------------------------|-----------|
| 14394 | L33930_s_at_GI_7019342-S       | CD24 signal transducer mRNA and 3'          | 19639.611 |
| 14395 | U49835_s_at_GI_11993934-S      | CHIT1 Chitinase 1                           | 19659.832 |
| 14396 | RC_AA465690_s_at_NA_illumina   | Splicing factor, arginine/serine-rich 11    | 19689.133 |
| 14397 | AB002379_at_GI_40548414-S      | Human mRNA for KIAA0381 gene, partial       | 19699.13  |
| 14398 | AA442054_s_at_NA_illumina      | Phospholipase C, gamma 1 (formerly          | 19710.508 |
| 14399 | RC_AA280734_i_at_GI_23200001-A | KIAA0618 gene product                       | 19720.787 |
| 14400 | RC_AA398264_at_NA_illumina     | Homo sapiens clone 23736 mRNA               | 19749.498 |
| 14401 | RC_AA428582_at_GI_21265087-S   | EST: zw74c12.s1 Soares testis NHT           | 19766.754 |
| 14402 | RC_AA452590_at_GI_40353730-S   | EST: zx39f03.s1 Soares total fetus          | 19769.496 |
| 14403 | RC_AA490522_at_NA_illumina     | EST: aa51g08.s1 NCI_CGAP_GCB1               | 19786.893 |
| 14404 | M31013_at_GI_22507396-S        | MYH9 Myosin, heavy polypeptide 9, non-      | 19858.371 |
| 14405 | HG4312-HT4582_s_at_NA_illumina | Transcription Factor Iiia                   | 19858.781 |
| 14406 | M35878_at_GI_19923110-S        | INSULIN-LIKE GROWTH FACTOR                  | 19866.938 |
| 14407 | RC_AA425852_s_at_NA_illumina   | EST: zw47g11.s1 Soares total fetus          | 19872.629 |
| 14408 | X69550_at_GI_34147601-S        | Rho GDP-dissociation Inhibitor 1            | 19873.773 |
| 14409 | Y00282_at_GI_35493915-S        | RPN2 Ribophorin II                          | 19917.762 |
| 14410 | AA090257_at_NA_illumina        | Superoxide dismutase 2, mitochondrial       | 19925.107 |
| 14411 | RC_AA488901_at_NA_illumina     | EST: aa55h09.s1 NCI_CGAP_GCB1               | 19947.533 |
| 14412 | AA427783_at_NA_illumina        | EST: zw49b02.r1 Soares total fetus          | 19948.75  |
| 14413 | RC_AA001409_f_at_NA_illumina   | EST: ze45d02.s1 Soares retina N2b4HR        | 19970.695 |
| 14414 | RC_AA084668_at_NA_illumina     | EST: zn20e08.s1 Stratagene                  | 19971.504 |
| 14415 | D31094_at_GI_8393383-S         | EST: Human fetal-lung cDNA 5'-end           | 19996.004 |
| 14416 | RC_AA280630_at_GI_4758439-S    | Glia maturation factor, gamma               | 20007.137 |
| 14417 | RC_AA055404_f_at_GI_21361932-S | EST: zl74e11.s1 Stratagene colon            | 20017.24  |
| 14418 | N77542_at_NA_illumina          | EST: yz89a10.r1 Homo sapiens cDNA           | 20030.06  |
| 14419 | D26068_at_GI_14702179-A        | KIAA0038 gene, partial cds                  | 20056.678 |
| 14420 | X60486_at-2_NA_illumina        | H4 histone family, member G                 | 20059.445 |
| 14421 | X60486_at_GI_21071024-S        | H4/g gene for H4 histone                    | 20059.445 |
| 14422 | RC_AA120783_at_NA_illumina     | Eukaryotic translation initiation factor 2, | 20085.287 |
| 14423 | RC_AA450092_at_NA_illumina     | Homo sapiens clones 24718 and 24825         | 20095.955 |
| 14424 | M13231_s_at_NA_illumina        | T-cell receptor, gamma cluster              | 20146.242 |
| 14425 | Z11584_s_at_GI_5453819-S       | H.sapiens NuMA gene (Clone T33)             | 20158.094 |
| 14426 | C00100_at_NA_illumina          | EST: HUMGS0005724, Human Gene               | 20200.182 |
| 14427 | M93650_at_GI_4505614-A         | Paired box gene (PAX6) homologue            | 20221.607 |
| 14428 | M93650_at-2_NA_illumina        | Human paired box gene (PAX6)                | 20221.607 |
| 14429 | RC_AA453786_s_at_GI_44680137-  | EST: aa19e09.s1 Soares NhHMPu S1            | 20223.684 |
| 14430 | RC_AA100521_at_NA_illumina     | EST: zn46g09.s1 Stratagene HeLa cell s3     | 20240.506 |
| 14431 | RC_AA610052_at_NA_illumina     | EST: af18h05.s1 Soares testis NHT Homo      | 20241.926 |
| 14432 | J04990_at_GI_23110953-S        | CATHEPSIN G PRECURSOR                       | 20264.78  |
| 14433 | AA448522_at_GI_34147561-S      | Human smoothed mRNA, complete cds           | 20265.035 |
| 14434 | U72518_s_at_NA_illumina        | Human destrin-2 pseudogene mRNA,            | 20265.705 |
| 14435 | D84239_at-2_NA_illumina        | IgG Fc binding protein                      | 20272.361 |
| 14436 | D84239_at_GI_4503680-S         | IgG Fc binding protein                      | 20272.361 |



|       |                                |                                             |           |
|-------|--------------------------------|---------------------------------------------|-----------|
| 14437 | U25034_s_at_GI_32307135-A      | Neuronatin alpha mRNA                       | 20316.207 |
| 14438 | RC_AA455242_at_GI_24497619-S   | EST: aa30f08.s1 NCI_CGAP_GCB1 Homo          | 20333.852 |
| 14439 | RC_AA262993_at_NA_illumina     | ATPase, H+ transporting, lysosomal          | 20353.182 |
| 14440 | RC_AA357204_s_at_GI_29029600-  | EST: EST65911 Jurkat T-cells I Homo         | 20357.09  |
| 14441 | RC_D59847_at_GI_20336240-S     | EST: Human fetal brain cDNA 3'-end GEN-     | 20414.844 |
| 14442 | AA174152_f_at_NA_illumina      | EST: PTH078 HTCDL1 Homo sapiens             | 20422.555 |
| 14443 | R69417_at_NA_illumina          | EST: yj83f12.r1 Homo sapiens cDNA clone     | 20429.678 |
| 14444 | HG3543-HT3739_at_NA_illumina   | Insulin-Like Growth Factor 2                | 20442     |
| 14445 | RC_AA291551_at_NA_illumina     | Human ets domain protein ERF mRNA,          | 20445.707 |
| 14446 | HG4020-HT4290_s_at_NA_illumina | Transglutaminase                            | 20478.512 |
| 14447 | D45319_at_GI_11096339-S        | EST: Human brain cDNA, mRNA                 | 20504.014 |
| 14448 | L10284_at_GI_31542290-S        | CANX Calnexin                               | 20524.617 |
| 14449 | W39183_s_at_NA_illumina        | Homo sapiens mRNA for KIAA0601              | 20568.523 |
| 14450 | D63079_s_at_NA_illumina        | EST: Human aorta cDNA 5'-end GEN-           | 20570.734 |
| 14451 | RC_AA399114_at_GI_42476278-S   | EST: zt89f06.s1 Soares testis NHT Homo      | 20606.727 |
| 14452 | AA411318_at_NA_illumina        | TAP binding protein (tapasin)               | 20638.842 |
| 14453 | M38591_at_GI_4506760-S         | S100A10 S100 calcium-binding protein        | 20646.477 |
| 14454 | RC_AA165369_at_NA_illumina     | EST: zq49c07.s1 Stratagene hNT neuron       | 20670.01  |
| 14455 | M84526_at_GI_42544238-S        | DF D component of complement (adipsin)      | 20718.12  |
| 14456 | M84526_at-2_NA_illumina        | D component of complement (adipsin)         | 20718.12  |
| 14457 | H61361_s_at_GI_41582237-A      | Immunoglobulin superfamily containing       | 20720.023 |
| 14458 | M94250_at_GI_24475622-S        | MDK Midkine (neurite growth-promoting       | 20723.707 |
| 14459 | RC_AA452593_at_NA_illumina     | EST: zx39f08.s1 Soares total fetus          | 20724.352 |
| 14460 | RC_AA600246_at_NA_illumina     | Phosphatidylinositol-4-phosphate 5-kinase,  | 20743.094 |
| 14461 | X03934_at_GI_4502668-S         | T-cell antigen receptor gene T3-delta       | 20749.602 |
| 14462 | K01396_at_GI_21361197-S        | PI Protease inhibitor 1 (anti-elastase),    | 20780.86  |
| 14463 | T30851_s_at_NA_illumina        | Homo sapiens clone 24775 mRNA               | 20799.037 |
| 14464 | HG688-HT688_f_at_NA_illumina   | Major Histocompatibility Complex, Class II, | 20806.188 |
| 14465 | RC_AA497050_at_NA_illumina     | EST: aa42c03.s1 Soares NhHMPu S1            | 20849.943 |
| 14466 | W26984_at_NA_illumina          | Calmodulin 1 (phosphorylase kinase,         | 20854.773 |
| 14467 | AA461140_at_NA_illumina        | EST: zx64f12.r1 Soares total fetus          | 20860.777 |
| 14468 | AB002323_at_GI_33350931-S      | Human mRNA for KIAA0325 gene, partial       | 20870.541 |
| 14469 | RC_AA290679_at_NA_illumina     | Selenium binding protein 1                  | 20882.344 |
| 14470 | RC_AA449419_at_GI_38524617-S   | EST: zx05b03.s1 Soares total fetus          | 20888.295 |
| 14471 | M37033_at_GI_21237756-S        | CD53 CD53 antigen                           | 20917.35  |
| 14472 | RC_AA429636_at_NA_illumina     | Hexokinase 2                                | 20950.572 |
| 14473 | Z21507_at_GI_25453471-A        | EEF1D Eukaryotic translation elongation     | 20989.49  |
| 14474 | X04654_s_at_GI_31543647-S      | SNRP70 U1 snRNP 70K protein                 | 21015.158 |
| 14475 | RC_AA236013_at_NA_illumina     | Cathepsin S                                 | 21038.088 |
| 14476 | RC_AA448228_at_GI_7661801-S    | EST: zw96d02.s1 Soares total fetus          | 21038.871 |
| 14477 | RC_AA151882_at_GI_31542944-S   | Human DNA sequence from clone 149A16        | 21061.457 |
| 14478 | RC_AA486201_s_at_NA_illumina   | High-mobility group (nonhistone             | 21068.479 |
| 14479 | AA428172_f_at_NA_illumina      | Notch (Drosophila) homolog 3                | 21071.957 |

|       |                              |                                            |           |
|-------|------------------------------|--------------------------------------------|-----------|
| 14480 | RC_AA489687_at_NA_illumina   | EST: aa50c11.s1 NCI_CGAP_GCB1              | 21092.059 |
| 14481 | M91391_at_NA_illumina        | Human mRNA for KIAA0179 gene, partial      | 21134.39  |
| 14482 | RC_AA480045_at_GI_42544128-S | EST: zv41a04.s1 Soares ovary tumor         | 21174.842 |
| 14483 | C00351_s_at_NA_illumina      | EST: HUMGS0003103, Human Gene              | 21228.492 |
| 14484 | V01512_rna1_at_GI_6552332-S  | Cellular oncogene c-fos (complete          | 21254.672 |
| 14485 | RC_AA399587_at_NA_illumina   | EST: zt93d01.s1 Soares testis NHT Homo     | 21285.656 |
| 14486 | M16652_at_NA_illumina        | ELA1 Elastase 1, pancreatic (elastase IIA) | 21300.354 |
| 14487 | RC_AA046750_at_NA_illumina   | EST: zf12d12.s1 Soares fetal heart         | 21311.666 |
| 14488 | RC_AA431571_at_GI_16418372-S | EST: zw79e12.s1 Soares testis NHT          | 21347.633 |
| 14489 | S80864_at_NA_illumina        | Cytochrome c-like polypeptide [human,      | 21368.773 |
| 14490 | S73003_s_at_NA_illumina      | PMEL 17 PROTEIN PRECURSOR                  | 21389.006 |
| 14491 | AA427468_s_at_GI_34335232-S  | Claudin 4                                  | 21415.396 |
| 14492 | X51345_at_NA_illumina        | JUNB Jun B proto-oncogene                  | 21436.156 |
| 14493 | RC_AA399445_at_NA_illumina   | EST: zt53a02.s1 Soares ovary tumor         | 21441.922 |
| 14494 | RC_AA256131_at_GI_6031166-S  | Glycophosphatidylinositol anchor           | 21452.014 |
| 14495 | T30617_at_GI_8922600-S       | EST: EST19559 Homo sapiens cDNA 5'         | 21465.379 |
| 14496 | D31767_at_GI_41281480-S      | KIAA0058 gene                              | 21466.74  |
| 14497 | RC_AA465697_at_NA_illumina   | BCL2/adenovirus E1B 19kD-interacting       | 21516.87  |
| 14498 | RC_AA085399_at_NA_illumina   | Homo sapiens mRNA for JM4 protein,         | 21541.955 |
| 14499 | AFFX-HUMRGE/M10098_M_at-     | Human 18S rRNA gene, complete. (from       | 21547.12  |
| 14500 | AFFX-                        | AFFX-HUMRGE/M10098_M_at                    | 21547.12  |
| 14501 | C01852_at_GI_34222318-S      | Homo sapiens mRNA for hypothetical         | 21552.414 |
| 14502 | RC_AA521165_at_NA_illumina   | EST: aa73d12.s1 NCI_CGAP_GCB1              | 21580.95  |
| 14503 | RC_AA479037_at_GI_22218620-S | EST: zu36b09.s1 Soares ovary tumor         | 21619.084 |
| 14504 | M98539_at_GI_38505192-S      | Prostaglandin D2 synthase gene             | 21634.055 |
| 14505 | RC_AA609163_at_NA_illumina   | Small inducible cytokine A5 (RANTES)       | 21636.934 |
| 14506 | H08939_at_NA_illumina        | KIAA0331 gene product                      | 21741.613 |
| 14507 | RC_AA135154_at_GI_11545766-S | EST: zo24g03.s1 Stratagene colon           | 21743.016 |
| 14508 | RC_AA411764_at_GI_22907038-S | EST: zu02b12.s1 Soares testis NHT Homo     | 21810.684 |
| 14509 | D56558_at_GI_5174444-S       | H.sapiens mRNA for p40                     | 21815.566 |
| 14510 | X87838_at_GI_40254459-S      | CTNNB1 Catenin (cadherin-associated        | 21821.89  |
| 14511 | RC_AA394121_at_GI_31415879-A | EST: zt52g05.s1 Soares ovary tumor         | 21841.998 |
| 14512 | RC_AA082041_at_GI_37547539-S | EST: zn21c01.s1 Stratagene                 | 21881.361 |
| 14513 | RC_AA620453_i_at_NA_illumina | EST: ae58d04.s1 Stratagene lung            | 21883.1   |
| 14514 | RC_AA228122_at_NA_illumina   | ATPase, H+ transporting, lysosomal         | 21935.744 |
| 14515 | X58529_at_NA_illumina        | IGHM Immunoglobulin mu                     | 21978.777 |
| 14516 | X65965_s_at_NA_illumina      | SOD-2 gene for manganese superoxide        | 22000.027 |
| 14517 | RC_AA453034_at_GI_31542542-S | EST: zx34d08.s1 Soares total fetus         | 22001.043 |
| 14518 | RC_AA442768_i_at_NA_illumina | Homo sapiens inner mitochondrial           | 22040.324 |
| 14519 | AFFX-HUMISGF3A/M97935_3_at-  | No info for gene                           | 22049.219 |
| 14520 | AFFX-                        | AFFX-HUMISGF3A/M97935_3_at                 | 22049.219 |
| 14521 | RC_AA007234_s_at_NA_illumina | EST: 13cDNA63-3.seq Soares infant brain    | 22097.53  |
| 14522 | X52003_at_GI_4507450-S       | TFF1 Trefoil factor 1 (breast cancer,      | 22112.777 |

|       |                                |                                        |           |
|-------|--------------------------------|----------------------------------------|-----------|
| 14523 | M21388_r_at_NA_illumina        | Unproductively rearranged Ig mu-chain  | 22172.158 |
| 14524 | U23852_s_at_NA_illumina        | T-lymphocyte specific protein tyrosine | 22215.326 |
| 14525 | X52426_s_at_GI_24234693-A      | KRT13 Keratin 13                       | 22242.475 |
| 14526 | AA480838_s_at_GI_21735617-A    | EST: zx87e06.r1 Soares ovary tumor     | 22274.008 |
| 14527 | RC_D51105_i_at_NA_illumina     | H.sapiens mRNA for NRD1 convertase     | 22380.607 |
| 14528 | S45630_at_GI_4503056-S         | CRYAB Crystallin alpha-B               | 22403.32  |
| 14529 | RC_AA227443_s_at_NA_illumina   | Kinesin family member 5C               | 22406.11  |
| 14530 | RC_AA416970_at_NA_illumina     | EST: zt94g03.s1 Soares testis NHT Homo | 22442.102 |
| 14531 | RC_AA449973_at_NA_illumina     | Homo sapiens okadaic acid-inducible    | 22443.31  |
| 14532 | AA482407_s_at_GI_31543135-S    | EST: zt34c01.r1 Soares ovary tumor     | 22450.91  |
| 14533 | RC_AA037357_f_at_NA_illumina   | EST: zc03c04.s1 Soares parathyroid     | 22458.068 |
| 14534 | AA293334_s_at_GI_13569961-S    | EST: zt53c11.r1 Soares ovary tumor     | 22461.06  |
| 14535 | M33764_at_GI_4505488-S         | ODC1 Ornithine decarboxylase 1         | 22462.602 |
| 14536 | RC_AA402787_s_at_NA_illumina   | Homo sapiens 34 kDa Mov34 homolog      | 22474.441 |
| 14537 | RC_AA403162_at_NA_illumina     | Homo sapiens clone 23675 mRNA          | 22479.03  |
| 14538 | AA313414_s_at_GI_42789379-S    | EST: EST185312 Colon carcinoma (HCC)   | 22483.33  |
| 14539 | D14812_at_GI_6912447-S         | KIAA0026 gene                          | 22589.95  |
| 14540 | RC_AA598626_at_GI_16753204-A   | EST: ae39h03.s1 Gessler Wilms tumor    | 22594.63  |
| 14541 | RC_AA281380_at_NA_illumina     | Homo sapiens zinc finger protein 216   | 22625.549 |
| 14542 | M89957_at_GI_11038675-A        | IGB Immunoglobulin-associated beta     | 22639.666 |
| 14543 | M89957_at-2_NA_illumina        | CD79B antigen (immunoglobulin-         | 22639.666 |
| 14544 | RC_AA460909_s_at_NA_illumina   | EST: zx61a05.s1 Soares total fetus     | 22642.875 |
| 14545 | M15517_cds5_at_GI_4507724-S    | TTR gene (prealbumin) extracted from   | 22649.453 |
| 14546 | U50743_at_GI_27754767-A        | Na,K-ATPase gamma subunit mRNA         | 22661.38  |
| 14547 | C02386_s_at_GI_7706157-S       | EST: HUMGS0010652, Human Gene          | 22682.447 |
| 14548 | RC_AA485697_at_GI_21618360-S   | EST: ab10e09.s1 Stratagene lung        | 22695.51  |
| 14549 | X63187_at_GI_18379361-A        | HE4 mRNA for extracellular proteinase  | 22724.99  |
| 14550 | AF006082_at_GI_5031570-S       | Actin-related protein 2                | 22742.4   |
| 14551 | RC_AA236455_s_at_NA_illumina   | EST: zr75g02.s1 Soares NhHMPu S1       | 22753.88  |
| 14552 | AA393164_s_at_GI_4505170-S     | Mammaglobin 2                          | 22796.594 |
| 14553 | RC_AA136130_at_NA_illumina     | VAMP (vesicle-associated membrane      | 22816.352 |
| 14554 | RC_AA600114_at_NA_illumina     | KIAA0455 gene product                  | 22821.24  |
| 14555 | RC_AA454597_s_at_NA_illumina   | EST: zx96a12.s1 Soares ovary tumor     | 22852.955 |
| 14556 | RC_AA035482_at_NA_illumina     | Homo sapiens clone 24655 mRNA          | 22867.617 |
| 14557 | N76496_at_GI_41393558-I        | Small inducible cytokine A5 (RANTES)   | 22878.895 |
| 14558 | M28130_rna1_s_at_GI_28610153-S | Interleukin 8 (IL8) gene               | 22887.83  |
| 14559 | RC_AA436624_s_at_NA_illumina   | Fatty acid binding protein 7, brain    | 22892.406 |
| 14560 | M19483_at_GI_32189393-S        | ATP5B ATP synthase, H+ transporting,   | 22915.83  |
| 14561 | RC_AA447796_at_NA_illumina     | EST: aa20g11.s1 Soares NhHMPu S1       | 22918.066 |
| 14562 | U81001_at_NA_illumina          | SNRPN mRNA, 3' UTR, partial sequence   | 22919.908 |
| 14563 | U81001_at-2_NA_illumina        | Human SNRPN mRNA, 3' UTR, partial      | 22919.908 |
| 14564 | H47955_s_at_GI_21536278-S      | Homo sapiens mRNA for cartilage-       | 22930.455 |
| 14565 | L15702_at_GI_34304350-S        | BF B-factor, properdin                 | 22965.377 |

|       |                                |                                              |           |
|-------|--------------------------------|----------------------------------------------|-----------|
| 14566 | AA096094_s_at_NA_illumina      | EST: I8200.seq.F Fetal heart, Lambda         | 23027.105 |
| 14567 | RC_AA084286_at_NA_illumina     | Homo sapiens mRNA for KIAA0287 gene,         | 23034.086 |
| 14568 | RC_AA404594_at_GI_4505074-S    | EST: zt43c03.s1 Soares ovary tumor           | 23059.006 |
| 14569 | RC_AA431191_s_at_NA_illumina   | EST: zw76f04.s1 Soares testis NHT Homo       | 23061.549 |
| 14570 | X04476_s_at_NA_illumina        | Lymphocyte-specific protein tyrosine         | 23093.83  |
| 14571 | RC_AA428870_at_NA_illumina     | EST: zw57h08.s1 Soares total fetus           | 23094.793 |
| 14572 | D31286_at_GI_19923785-S        | Homo sapiens mRNA for smallest subunit       | 23113.262 |
| 14573 | AA454214_at_GI_13430863-A      | Homo sapiens clone 23631 mRNA                | 23121.602 |
| 14574 | X14046_at_GI_4502662-S         | CD37 CD37 antigen                            | 23185.352 |
| 14575 | U52101_at_GI_4503562-S         | YMP mRNA                                     | 23200.584 |
| 14576 | M26311_s_at_NA_illumina        | Cystic fibrosis antigen mRNA                 | 23236.605 |
| 14577 | M22612_f_at_GI_21071011-S      | PRSS1 Protease, serine, 1 (trypsin 1)        | 23247.59  |
| 14578 | RC_AA504890_at_NA_illumina     | EST: ab03d12.s1 Stratagene fetal retina      | 23256.076 |
| 14579 | RC_AA292533_at_NA_illumina     | EST: zs59b05.s1 NCI_CGAP_GCB1                | 23270.809 |
| 14580 | T47256_s_at_NA_illumina        | Growth arrest-specific 6                     | 23339.66  |
| 14581 | RC_AA479498_at_GI_21361824-S   | EST: zv21d10.s1 Soares NhHMPu S1             | 23377.45  |
| 14582 | RC_AA430496_r_at_NA_illumina   | Ferritin, light polypeptide                  | 23379.646 |
| 14583 | RC_AA256273_at_GI_12232428-S   | EST: zr81c12.s1 Soares NhHMPu S1             | 23382.86  |
| 14584 | AA214710_at_GI_19913435-S      | ATPase, H+ transporting, lysosomal           | 23385.545 |
| 14585 | J04080_at_GI_41393600-A        | C1S Complement component 1, s                | 23387.572 |
| 14586 | RC_AA227884_at_NA_illumina     | EST: zr57a09.s1 Soares NhHMPu S1             | 23413.053 |
| 14587 | J04173_at_GI_31543395-S        | PGAM1 Phosphoglycerate mutase 1              | 23414.45  |
| 14588 | U12255_at_GI_34222296-S        | IgG Fc receptor hFcRn mRNA                   | 23465.838 |
| 14589 | U12255_at-2_NA_illumina        | Fc fragment of IgG, receptor, transporter,   | 23465.838 |
| 14590 | AA496423_at_GI_24430131-S      | EST: zv37d02.r1 Soares ovary tumor           | 23488.664 |
| 14591 | AA044755_s_at_NA_illumina      | EST: zk73c11.r1 Soares pregnant uterus       | 23490.27  |
| 14592 | Z37166_at_GI_45580711-A        | BAT1 mRNA for nuclear RNA helicase           | 23495.857 |
| 14593 | RC_AA256268_at_GI_31317223-S   | EST: zr80c01.s1 Soares NhHMPu S1             | 23520.016 |
| 14594 | W27023_at_GI_5902015-A         | Homo sapiens mRNA for KIAA0886               | 23536.217 |
| 14595 | RC_AA256210_at_GI_37674282-S   | EST: zr80a11.s1 Soares NhHMPu S1             | 23575.172 |
| 14596 | RC_AA284914_at_NA_illumina     | EST: zt23a09.s1 Soares ovary tumor           | 23578.871 |
| 14597 | RC_AA121879_s_at_NA_illumina   | Proteasome (prosome, macropain)              | 23590.318 |
| 14598 | HG1612-HT1612_at_NA_illumina   | Macmarcks                                    | 23598.072 |
| 14599 | RC_AA258378_at_NA_illumina     | EST: zr62a09.s1 Soares NhHMPu S1             | 23636.406 |
| 14600 | HG1322-HT5143_s_at_NA_illumina | Small Nuclear Ribonucleoprotein,             | 23660.195 |
| 14601 | U51004_at_GI_29135342-S        | Putative protein kinase C inhibitor (PKCI-1) | 23685.336 |
| 14602 | W52638_at_NA_illumina          | EST: zc49f01.r1 Soares senescent             | 23761.941 |
| 14603 | RC_AA479114_at_NA_illumina     | EST: zv17h04.s1 Soares NhHMPu S1             | 23788.402 |
| 14604 | AA296994_s_at_GI_34147430-S    | Homo sapiens mRNA for putative seven         | 23835.408 |
| 14605 | X01703_at_GI_17986282-S        | Alpha-tubulin mRNA                           | 23847.139 |
| 14606 | AA431017_at_GI_7705476-S       | EST: PMY0907 KG1-a Lambda Zap                | 23848.867 |
| 14607 | RC_AA284086_at_NA_illumina     | EST: zs49c02.s1 NCI_CGAP_GCB1                | 23894.777 |
| 14608 | RC_AA412104_f_at_GI_21553322-S | EST: zt69a05.s1 Soares testis NHT Homo       | 23896.17  |

|       |                                |                                              |           |
|-------|--------------------------------|----------------------------------------------|-----------|
| 14609 | RC_AA598725_at_GI_24497600-A   | Endothelial differentiation-related factor 1 | 23906.014 |
| 14610 | M62831_at_GI_4758313-S         | Transcription factor ETR101 mRNA             | 23922.639 |
| 14611 | RC_AA481143_at_NA_illumina     | Homo sapiens mRNA for KIAA0515               | 23946.102 |
| 14612 | X82240_rna1_at_GI_11415027-S   | TCL1 gene (T cell leukemia) extracted        | 23956.648 |
| 14613 | RC_AA022615_at_NA_illumina     | EST: ze72h10.s1 Soares fetal heart           | 23986.725 |
| 14614 | X69908_rna1_at_GI_6671590-S    | P2 gene for c subunit of mitochondrial ATP   | 23996.342 |
| 14615 | X69908_rna1_at-2_NA_illumina   | ATP synthase, H <sup>+</sup> transporting,   | 23996.342 |
| 14616 | X65614_at_GI_5174662-S         | S100P S100 calcium-binding protein P         | 24032.645 |
| 14617 | AA418351_at_GI_19913415-A      | EST: zv96e07.r1 Soares NhHMPu S1             | 24044.25  |
| 14618 | RC_AA086057_s_at_NA_illumina   | Ribosomal protein, mitochondrial, S12        | 24069.555 |
| 14619 | AB000221_at_GI_22547150-S      | Small inducible cytokine subfamily A (Cys-   | 24135.547 |
| 14620 | AF006086_at_GI_23397667-S      | ARP2/3 protein complex subunit p21           | 24163.08  |
| 14621 | M84332_at_GI_6995997-S         | ARF1 ADP-ribosylation factor 1               | 24168.996 |
| 14622 | Z74615_at_NA_illumina          | COL1A1 Collagen, type I, alpha 1             | 24209.637 |
| 14623 | X57129_at_GI_21071025-S        | HISTONE H1D                                  | 24215.88  |
| 14624 | X57129_at-2_NA_illumina        | H1 histone family, member 2                  | 24215.88  |
| 14625 | RC_AA233541_at_GI_29337293-A   | EST: zr30h08.s1 Stratagene NT2 neuronal      | 24231.48  |
| 14626 | M21119_s_at_NA_illumina        | LYZ Lysozyme                                 | 24255.86  |
| 14627 | HG371-HT26388_s_at_NA_illumina | Mucin 1, Epithelial, Alt. Splice 9           | 24284.459 |
| 14628 | AA156670_s_at_NA_illumina      | Homo sapiens agrin precursor mRNA,           | 24286.613 |
| 14629 | AA092716_at_GI_42544214-S      | HLA-B associated transcript-3                | 24309.74  |
| 14630 | RC_AA411825_s_at_NA_illumina   | EST: zt67c03.s1 Soares testis NHT Homo       | 24319.8   |
| 14631 | AA464013_at_NA_illumina        | EST: zx82d05.r1 Soares ovary tumor           | 24367.27  |
| 14632 | AB006782_at_GI_6806891-A       | Galectin-9 isoform                           | 24464.072 |
| 14633 | AA263032_s_at_NA_illumina      | EST: PMY0335 KG1-a Lambda Zap                | 24490.006 |
| 14634 | M81057_at_GI_4503002-S         | CPB1 Carboxypeptidase B1 (tissue)            | 24502.89  |
| 14635 | AA353903_s_at_NA_illumina      | EST: EST62091 Jurkat T-cells V Homo          | 24517.033 |
| 14636 | C15910_s_at_GI_38569472-S      | NADH dehydrogenase (ubiquinone) 1 beta       | 24520.11  |
| 14637 | HG1515-HT1515_f_at_NA_illumina | Transcription Factor Btf3b                   | 24520.855 |
| 14638 | RC_AA458890_at_GI_40353752-S   | EST: zx88c06.s1 Soares ovary tumor           | 24524.65  |
| 14639 | RC_AA262659_at_GI_31542945-S   | EST: zs21b09.s1 NCI_CGAP_GCB1                | 24537.07  |
| 14640 | U95040_at_GI_14971416-S        | Unknown protein mRNA, partial cds            | 24537.48  |
| 14641 | J02683_s_at_GI_4502098-S       | ANT2 Adenine nucleotide translocator 2       | 24548.338 |
| 14642 | AA480074_at_NA_illumina        | EST: zv42b05.r1 Soares ovary tumor           | 24568.717 |
| 14643 | M96326_rna1_at_GI_28416954-S   | Azurocidin gene                              | 24587.014 |
| 14644 | AA482390_at_GI_18105057-S      | EST: zv05h05.r1 Soares NhHMPu S1             | 24590.342 |
| 14645 | L06797_s_at_GI_4503174-S       | PROBABLE G PROTEIN-COUPLED                   | 24597.22  |
| 14646 | AA411584_s_at_NA_illumina      | EST: zv30f05.r1 Soares ovary tumor           | 24607.562 |
| 14647 | RC_AA489459_at_NA_illumina     | EST: ae31b11.s1 Gessler Wilms tumor          | 24635.807 |
| 14648 | RC_AA485249_at_GI_33457347-S   | Homo sapiens chromosome 19, cosmid           | 24670.752 |
| 14649 | D57916_s_at_NA_illumina        | Homo sapiens clone 24775 mRNA                | 24679.578 |
| 14650 | X13546_rna1_at_GI_5031748-S    | Put. HMG-17 protein gene extracted from      | 24707.475 |
| 14651 | AA099391_s_at_NA_illumina      | EST: zk85e12.r1 Soares pregnant uterus       | 24719.117 |

|       |                              |                                            |           |
|-------|------------------------------|--------------------------------------------|-----------|
| 14652 | RC_AA417265_s_at_NA_illumina | EST: zu07h02.s1 Soares testis NHT Homo     | 24841.338 |
| 14653 | J02783_at_GI_20070124-S      | P4HB Procollagen-proline, 2-oxoglutarate   | 24871.15  |
| 14654 | X62654_rna1_at_GI_34328936-S | ME491 gene extracted from H.sapiens        | 24871.992 |
| 14655 | RC_AA058911_at_GI_24308086-S | EST: zl96b05.s1 Stratagene corneal         | 24899.152 |
| 14656 | W38687_at_GI_4759057-S       | SH3 binding protein                        | 24928.338 |
| 14657 | X17042_at_NA_illumina        | PRG1 Proteoglycan 1, secretory granule     | 24981.068 |
| 14658 | RC_AA478599_at_GI_41584199-S | EGF-TM7-like                               | 25020.568 |
| 14659 | X71428_at_GI_4826733-S       | RNA-BINDING PROTEIN FUS/TLS                | 25034.145 |
| 14660 | M92843_s_at_GI_4507960-S     | ZFP36 Zinc finger protein homologous to    | 25068.52  |
| 14661 | M24461_at_GI_38504666-I      | PULMONARY SURFACTANT-                      | 25083.428 |
| 14662 | D30655_at_GI_9945313-S       | EIF4A2 Eukaryotic translation initiation   | 25089.55  |
| 14663 | RC_AA401348_at_NA_illumina   | EST: zu62e03.s1 Soares testis NHT Homo     | 25131.312 |
| 14664 | C01766_s_at_NA_illumina      | EST: HUMGS0003714, Human Gene              | 25149.43  |
| 14665 | X67325_at_GI_44771157-S      | INTERFERON-ALPHA INDUCED 11.5 KD           | 25154.965 |
| 14666 | RC_AA456588_at_NA_illumina   | Homo sapiens BC-2 protein mRNA,            | 25172.365 |
| 14667 | X60036_at_GI_6031191-A       | PHC Phosphate carrier, mitochondrial       | 25177     |
| 14668 | Y07755_at_GI_45269153-S      | S100A2 gene, exon 1, 2 and 3               | 25229.455 |
| 14669 | RC_AA478298_s_at_NA_illumina | Human apM2 mRNA for GS2374                 | 25269.156 |
| 14670 | AA405775_s_at_NA_illumina    | EST: zu57c10.r1 Soares ovary tumor         | 25301.244 |
| 14671 | AA247275_at_GI_42740890-S    | EST: csg0884.seq.F Human fetal heart,      | 25323.148 |
| 14672 | RC_AA211388_at_NA_illumina   | EST: zq88c04.s1 Stratagene hNT neuron      | 25339.11  |
| 14673 | W28167_at_NA_illumina        | EST: 43a1 Human retina cDNA randomly       | 25434.88  |
| 14674 | H14879_at_NA_illumina        | EST: ym25f01.r1 Homo sapiens cDNA          | 25484.611 |
| 14675 | RC_AA232942_at_NA_illumina   | EST: zr46e02.s1 Soares NhHMPu S1           | 25558.578 |
| 14676 | RC_AA428451_at_GI_19923467-S | EST: zw34f12.s1 Soares ovary tumor         | 25598.38  |
| 14677 | R29657_at_NA_illumina        | Eukaryotic translation elongation factor 1 | 25614.709 |
| 14678 | RC_AA428243_at_GI_31563375-A | Integrin beta 4 binding protein            | 25617.834 |
| 14679 | RC_AA282269_at_NA_illumina   | EST: zt12g02.s1 NCI_CGAP_GCB1 Homo         | 25648.668 |
| 14680 | M31627_at_GI_14110394-S      | X BOX BINDING PROTEIN-1                    | 25673.91  |
| 14681 | J00268_s_at_GI_4557670-S     | INS Insulin                                | 25737.11  |
| 14682 | M18728_at_GI_40255012-S      | NCA Non-specific cross reacting antigen    | 25747.047 |
| 14683 | X76223_s_at_GI_12408664-A    | MAL gene exon 4                            | 25759.742 |
| 14684 | RC_AA461097_at_GI_7657344-S  | Human 150 kDa oxygen-regulated protein     | 25784.562 |
| 14685 | L18983_at_GI_18860905-S      | Tyrosine phosphatase (IA-2/PTP) mRNA       | 25785.79  |
| 14686 | L18983_at-2_NA_illumina      | Protein tyrosine phosphatase, receptor     | 25785.79  |
| 14687 | D83883_s_at_NA_illumina      | Human tip associating protein (TAP)        | 25789.488 |
| 14688 | U14603_at_GI_18104972-A      | Protein tyrosine phosphatase PTPCAAX2      | 25807.176 |
| 14689 | RC_AA416963_at_GI_29553969-A | EST: zt69h05.s1 Soares testis NHT Homo     | 25812.666 |
| 14690 | AFFX-HUMRGE/M10098_3_at-     | Human 18S rRNA gene, complete. (from       | 25832.514 |
| 14691 | AFFX-                        | AFFX-HUMRGE/M10098_3_at                    | 25832.514 |
| 14692 | AA402298_s_at_GI_34452697-S  | Actinin, alpha 4                           | 25848.336 |
| 14693 | M68519_rna1_at_GI_13346505-S | Pulmonary surfactant-associated protein    | 25851.816 |
| 14694 | RC_AA412483_at_NA_illumina   | Homo sapiens clone 24448 unknown           | 25861.098 |

|       |                              |                                              |           |
|-------|------------------------------|----------------------------------------------|-----------|
| 14695 | AB002336_at_GI_30061490-A    | Human mRNA for KIAA0338 gene, partial        | 25900.438 |
| 14696 | RC_AA059386_at_GI_33620741-S | EST: zf66c03.s1 Soares retina N2b4HR         | 25963.492 |
| 14697 | RC_AA236173_at_NA_illumina   | Homo sapiens phosphatidylinositol            | 25969.947 |
| 14698 | RC_AA496891_at_NA_illumina   | EST: ae33c05.s1 Gessler Wilms tumor          | 26003.594 |
| 14699 | AA429539_f_at_GI_9506686-S   | EST: zw74d03.r1 Soares testis NHT Homo       | 26038.78  |
| 14700 | M35410_s_at_NA_illumina      | Insulin-like growth factor binding protein 2 | 26092.482 |
| 14701 | RC_AA432168_at_NA_illumina   | Homo sapiens clone 23931 mRNA, partial       | 26094.252 |
| 14702 | X03068_f_at_NA_illumina      | HLA CLASS II HISTOCOMPATIBILITY              | 26125.324 |
| 14703 | C01688_s_at_GI_7705820-S     | EST: HUMGS0002068, Human Gene                | 26185.408 |
| 14704 | X67951_at_GI_32455265-A      | PAGA Proliferation-associated gene A         | 26204.518 |
| 14705 | RC_AA029368_at_GI_33342277-S | EST: zk12g09.s1 Soares pregnant uterus       | 26228.697 |
| 14706 | RC_AA435507_at_NA_illumina   | Homo sapiens mRNA for KIAA0731               | 26230.197 |
| 14707 | U52696_s_at_NA_illumina      | Adrenal Creb-rp homolog (Creb-rp), and       | 26255.613 |
| 14708 | RC_AA477346_at_NA_illumina   | EST: zu36h02.s1 Soares ovary tumor           | 26325.275 |
| 14709 | AA306121_at_NA_illumina      | EST: EST177101 Jurkat T-cells VI Homo        | 26328.582 |
| 14710 | RC_AA609317_at_GI_42476067-S | EST: af13h02.s1 Soares testis NHT Homo       | 26348.293 |
| 14711 | X15822_at_GI_18105035-S      | COX7A2 Cytochrome c oxidase VIIa             | 26384.664 |
| 14712 | X12876_s_at_GI_40354193-A    | KRT18 Keratin 18                             | 26462.408 |
| 14713 | RC_AA243497_at_GI_21359961-S | Human DNA sequence from clone 30M3           | 26469.047 |
| 14714 | M94046_at_NA_illumina        | Zinc finger protein (MAZ) mRNA               | 26493.49  |
| 14715 | RC_AA608537_at_NA_illumina   | EST: ae53c08.s1 Stratagene lung              | 26501.611 |
| 14716 | X04470_s_at_GI_15834622-S    | RPL32 Ribosomal protein L32                  | 26539.773 |
| 14717 | AC002115_cds1_at_NA_illumina | COX6B gene (COXG) extracted from             | 26545.93  |
| 14718 | RC_AA416546_at_NA_illumina   | Kinesin family member 5B                     | 26555.744 |
| 14719 | AA464639_at_GI_4759055-S     | Ribosome binding protein 1 (dog 180kD        | 26600.191 |
| 14720 | RC_AA205334_at_NA_illumina   | EST: zq79d12.s1 Stratagene hNT neuron        | 26615.361 |
| 14721 | RC_AA504110_at_NA_illumina   | EST: aa59a08.s1 NCI_CGAP_GCB1                | 26663.584 |
| 14722 | AA401334_at_NA_illumina      | EST: zu55e09.r1 Soares ovary tumor           | 26694.102 |
| 14723 | RC_AA284506_s_at_NA_illumina | EST: zt20f02.s1 Soares ovary tumor           | 26715.387 |
| 14724 | X03100_cds2_at_GI_24797073-S | HLA-SB alpha gene (class II antigen)         | 26729.832 |
| 14725 | RC_AA398552_at_NA_illumina   | Homo sapiens mRNA for KIAA0639               | 26750.049 |
| 14726 | RC_AA084640_at_GI_25121990-S | EST: zn20d05.s1 Stratagene                   | 26765.111 |
| 14727 | AA281677_at_NA_illumina      | EST: zt03c01.r1 NCI_CGAP_GCB1 Homo           | 26795.092 |
| 14728 | M59807_at_NA_illumina        | NATURAL KILLER CELLS PROTEIN 4               | 26802.37  |
| 14729 | H43286_s_at_GI_11497611-A    | Gamma-aminobutyric acid (GABA) B             | 26841.266 |
| 14730 | RC_AA600138_at_NA_illumina   | Ribosomal protein S20                        | 26921.705 |
| 14731 | RC_AA464245_at_NA_illumina   | EST: zx81a11.s1 Soares ovary tumor           | 26928.719 |
| 14732 | AA310328_at_GI_24475953-S    | EST: EST181171 Jurkat T-cells V Homo         | 26950.875 |
| 14733 | X56597_s_at_NA_illumina      | Fibrillarin                                  | 26978.076 |
| 14734 | AA303745_s_at_GI_27436896-A  | TAP binding protein (tapasin)                | 26989.697 |
| 14735 | RC_AA608546_at_NA_illumina   | EST: ae53d06.s1 Stratagene lung              | 27020.879 |
| 14736 | RC_AA410510_at_GI_20070295-S | EST: zv16g03.s1 Soares NhHMPu S1             | 27090.258 |
| 14737 | U08021_at_GI_5453789-S       | Nicotinamide N-methyltransferase (NNMT)      | 27121.607 |

|       |                                |                                             |           |
|-------|--------------------------------|---------------------------------------------|-----------|
| 14738 | AFFX-M27830_5_at_NA_illumina   | AFFX-M27830_5_at (endogenous control)       | 27144.234 |
| 14739 | AFFX-M27830_5_at-2_NA_illumina | Human 28S ribosomal RNA gene,               | 27144.234 |
| 14740 | HG3991-HT4261_r_at_NA_illumina | Cpg-Enriched Dna, Clone E18                 | 27192.395 |
| 14741 | X13794_rna1_at_GI_22726178-S   | Lactate dehydrogenase B gene exon 1         | 27220.28  |
| 14742 | RC_AA235385_at_NA_illumina     | EST: zt30h10.s1 Soares ovary tumor          | 27266.084 |
| 14743 | C00032_at_NA_illumina          | EST: HUMGS0003377, Human Gene               | 27267.967 |
| 14744 | RC_AA489245_at_GI_41350324-A   | EST: aa57h06.s1 NCI_CGAP_GCB1               | 27279.45  |
| 14745 | RC_AA287104_at_GI_17999536-S   | Homo sapiens mRNA for PRP8 protein,         | 27352.787 |
| 14746 | RC_AA486092_at_NA_illumina     | EST: ab14d08.s1 Stratagene lung             | 27456.025 |
| 14747 | U51240_at_GI_5803055-S         | KIAA0085 gene, partial cds                  | 27457.254 |
| 14748 | AA364267_at_GI_24308286-S      | EST: EST74873 Pineal gland II Homo          | 27489.783 |
| 14749 | M27602_f_at_GI_21071012-S      | Protease, serine, 2 (trypsin 2)             | 27546.39  |
| 14750 | L17131_rna1_at_GI_22208974-A   | High mobility group protein (HMG-I(Y))      | 27550.941 |
| 14751 | HG3514-HT3708_at_NA_illumina   | Tropomyosin Tm30nm, Cytoskeletal            | 27581.084 |
| 14752 | M20471_at_GI_4502898-A         | CLTA Clathrin light chain A                 | 27603.867 |
| 14753 | RC_AA479727_i_at_NA_illumina   | EST: zu35b01.s1 Soares ovary tumor          | 27642.617 |
| 14754 | AFFX-HSAC07/X00351_3_st-       | No info for gene                            | 27642.625 |
| 14755 | AFFX-                          | AFFX-HSAC07/X00351_3_st (endogenous         | 27642.625 |
| 14756 | X07979_at_NA_illumina          | ITGB1 Integrin, beta 1 (fibronectin         | 27658.709 |
| 14757 | RC_AA258801_s_at_NA_illumina   | C-terminal binding protein 1                | 27708.03  |
| 14758 | N79674_s_at_NA_illumina        | EST: yz81h05.r1 Homo sapiens cDNA           | 27841.975 |
| 14759 | S39329_at_GI_20149573-S        | KLK1 Kallikrein 1 (renal/pancreas/salivary) | 27962.328 |
| 14760 | V00563_at_NA_illumina          | Immunoglobulin mu, part of exon 8           | 28077.754 |
| 14761 | T48195_s_at_GI_4503514-S       | Eukaryotic translation initiation factor 3, | 28142.795 |
| 14762 | C00476_at_GI_23199988-S        | EST: HUMGS0007866, Human Gene               | 28144.799 |
| 14763 | W26436_s_at_NA_illumina        | Microtubule-associated protein 1B           | 28218.95  |
| 14764 | RC_AA487218_at_NA_illumina     | EST: ab19g10.s1 Stratagene lung             | 28231.875 |
| 14765 | RC_AA430179_s_at_GI_41282247-  | Putative Ac-like transposon                 | 28288.81  |
| 14766 | RC_AA131084_at_NA_illumina     | Procollagen-lysine, 2-oxoglutarate 5-       | 28333.865 |
| 14767 | AA122003_at_NA_illumina        | Ferritin, heavy polypeptide 1               | 28371.014 |
| 14768 | RC_AA436146_f_at_GI_10257436-S | EST: zv22a12.s1 Soares NhHMPu S1            | 28421.38  |
| 14769 | AA455403_at_GI_41327713-S      | EST: aa03d07.r1 Soares NhHMPu S1            | 28660.846 |
| 14770 | X51521_at_GI_21614498-S        | VIL2 Villin 2 (ezrin)                       | 28700.75  |
| 14771 | RC_AA431193_at_GI_44917607-S   | Homo sapiens mRNA for KIAA0544              | 28734.725 |
| 14772 | RC_AA455097_i_at_NA_illumina   | EST: aa04f08.s1 Soares NhHMPu S1            | 28798.17  |
| 14773 | X02761_s_at_GI_16933543-A      | FN1 Fibronectin 1                           | 28940.418 |
| 14774 | AA056170_at_GI_34147536-S      | EST: zk70c10.r1 Soares pregnant uterus      | 28962.303 |
| 14775 | RC_AA599643_at_GI_14670372-A   | EST: ag10b05.s1 Gessler Wilms tumor         | 28981.518 |
| 14776 | R67297_at_GI_31657095-A        | EST: yh08d12.r2 Homo sapiens cDNA           | 28987.523 |
| 14777 | RC_AA278720_at_GI_30387616-S   | EST: zs77e07.s1 NCI_CGAP_GCB1               | 28992.857 |
| 14778 | RC_D59321_f_at_NA_illumina     | Homo sapiens mRNA for APCL protein,         | 29037.602 |
| 14779 | RC_AA405819_at_GI_31742497-S   | Homo sapiens clone 23912 mRNA               | 29187.916 |
| 14780 | AA481723_at_GI_17978492-S      | Deleted in oral cancer-1                    | 29231.488 |



|       |                                |                                              |           |
|-------|--------------------------------|----------------------------------------------|-----------|
| 14781 | RC_AA286862_at_NA_illumina     | EST: zs58b06.s1 NCI_CGAP_GCB1                | 29234.652 |
| 14782 | RC_AA431399_at_NA_illumina     | Homo sapiens chromosome 1 atrophin-1         | 29256.174 |
| 14783 | M11844_at_NA_illumina          | Transthyretin (prealbumin, amyloidosis)      | 29290.309 |
| 14784 | HG417-HT417_s_at_NA_illumina   | Cathepsin B                                  | 29327.902 |
| 14785 | AA228107_at_GI_33519456-A      | EST: zr58b05.r1 Soares NhHMPu S1             | 29384.498 |
| 14786 | RC_AA258022_at_GI_42518075-S   | Tissue inhibitor of metalloproteinase 1      | 29388.488 |
| 14787 | W79850_at_GI_13376853-S        | EST: zd75e07.r1 Soares fetal heart           | 29474.494 |
| 14788 | D31305_at_NA_illumina          | Protein tyrosine phosphatase type IVA,       | 29508.928 |
| 14789 | RC_AA452551_at_NA_illumina     | EST: zx35f06.s1 Soares total fetus           | 29628.158 |
| 14790 | RC_AA282343_at_NA_illumina     | Homo sapiens histone H2A.F/Z variant         | 29665.256 |
| 14791 | RC_AA007153_at_GI_40288202-S   | EST: 13cDNA40-3.seq Soares infant brain      | 29730.91  |
| 14792 | RC_AA437235_s_at_NA_illumina   | EST: zv54c11.s1 Soares testis NHT Homo       | 29742.338 |
| 14793 | AF006083_at_GI_34452698-S      | Actin-related protein 3                      | 29756.535 |
| 14794 | J02611_at_GI_4502162-S         | APOD Apolipoprotein D                        | 29785.736 |
| 14795 | W68097_at_NA_illumina          | EST: zd41b11.r1 Soares fetal heart           | 29838.928 |
| 14796 | X57809_s_at_NA_illumina        | IGL@ Immunoglobulin lambda light chain       | 29844.742 |
| 14797 | RC_AA284767_at_GI_24308188-S   | EST: zt21h07.s1 Soares ovary tumor           | 29918.453 |
| 14798 | J03040_at_GI_4507170-S         | SPARC SPARC/osteonectin                      | 29943.55  |
| 14799 | RC_AA148318_s_at_NA_illumina   | Human mRNA for KIAA0069 gene, partial        | 29988.361 |
| 14800 | RC_AA417588_at_NA_illumina     | EST: zv04f10.s1 Soares NhHMPu S1             | 30132.186 |
| 14801 | U44839_at_GI_24234682-S        | Putative ubiquitin C-terminal hydrolase      | 30148.08  |
| 14802 | L08044_s_at_GI_4507452-S       | TFF3 Trefoil factor 3 (intestinal)           | 30186.615 |
| 14803 | L08044_s_at-2_NA_illumina      | Trefoil factor 3 (intestinal)                | 30186.615 |
| 14804 | HG1153-HT1153_at_NA_illumina   | Nucleoside Diphosphate Kinase Nm23-          | 30273.432 |
| 14805 | RC_AA232686_s_at_GI_42476017-S | EST: zr75d05.s1 Soares NhHMPu S1             | 30320.877 |
| 14806 | RC_AA084898_at_NA_illumina     | MRJ gene for a member of the DNAJ            | 30349.525 |
| 14807 | RC_AA487879_at_GI_34222365-S   | EST: ab12a04.s1 Stratagene lung              | 30350.701 |
| 14808 | U90915_at_GI_17017985-S        | COX4 Cytochrome c oxidase subunit IV         | 30399.252 |
| 14809 | U70439_s_at_GI_5454087-S       | PHAPI2b protein                              | 30424.64  |
| 14810 | D00654_at_GI_11038625-S        | Enteric smooth muscle gamma-actin gene,      | 30445.162 |
| 14811 | HG2261-HT2351_s_at_NA_illumina | Antigen, Prostate Specific, Alt. Splice Form | 30548.354 |
| 14812 | U22178_s_at_NA_illumina        | MSMB Beta-microseminoprotein (prostate       | 30569.73  |
| 14813 | X78992_at_NA_illumina          | ERF-2 mRNA                                   | 30663.076 |
| 14814 | H21148_s_at_NA_illumina        | EST: yn65e06.r1 Homo sapiens cDNA            | 30674.855 |
| 14815 | J04823_rna1_at_NA_illumina     | Cytochrome c oxidase subunit VIII (COX8)     | 30690.475 |
| 14816 | M60858_rna1_at_GI_4885510-S    | Nucleolin gene                               | 30702.139 |
| 14817 | RC_AA425309_at_NA_illumina     | EST: zw46c01.s1 Soares total fetus           | 30737.23  |
| 14818 | Y12661_rna1_at_GI_17136077-S   | VGF nerve growth factor inducible            | 30785.97  |
| 14819 | H67195_s_at_NA_illumina        | Notch (Drosophila) homolog 3                 | 30799.387 |
| 14820 | C01687_s_at_GI_4757811-S       | F1Fo-ATPase synthase f subunit               | 30841.377 |
| 14821 | AF001548_rna1_at_GI_13124878-A | 815A9.1 gene (myosin heavy chain)            | 30853.139 |
| 14822 | X16560_at_GI_18105039-S        | COX7C Cytochrome c oxidase VIIc subunit      | 30940.998 |
| 14823 | RC_AA100719_s_at_NA_illumina   | Non-specific cross reacting antigen          | 30974.879 |

|       |                                |                                             |           |
|-------|--------------------------------|---------------------------------------------|-----------|
| 14824 | RC_AA232549_i_at_NA_illumina   | EST: zr24c06.s1 Stratagene NT2 neuronal     | 31129.043 |
| 14825 | R87373_s_at_NA_illumina        | Iduronate 2-sulfatase (Hunter syndrome)     | 31146.154 |
| 14826 | C01257_at_NA_illumina          | EST: HUMGS0007992, Human Gene               | 31158.723 |
| 14827 | RC_AA478104_at_NA_illumina     | EST: zt89c03.s1 Soares testis NHT Homo      | 31425.686 |
| 14828 | HG3236-HT3413_f_at_NA_illumina | Neurofibromatosis 2 Tumor Suppressor        | 31625.07  |
| 14829 | N75791_s_at_NA_illumina        | EST: yw30g02.r1 Homo sapiens cDNA           | 31665.06  |
| 14830 | X14008_rna1_f_at_NA_illumina   | Lysozyme gene (EC 3.2.1.17)                 | 31665.412 |
| 14831 | AA355201_at_NA_illumina        | EST: EST63578 Jurkat T-cells V Homo         | 31675.895 |
| 14832 | RC_AA598689_at_NA_illumina     | EST: ae49a08.s1 Stratagene lung             | 31684.996 |
| 14833 | H46831_at_NA_illumina          | EST: yo18b06.r1 Homo sapiens cDNA           | 31787.29  |
| 14834 | AA291456_s_at_GI_27734804-S    | EST: zt44f12.r1 Soares ovary tumor          | 31835.121 |
| 14835 | H08068_at_NA_illumina          | Homo sapiens clone 23967 unknown            | 31851.863 |
| 14836 | U58856_at_NA_illumina          | Endocytic receptor (macrophage mannose      | 31998.35  |
| 14837 | RC_AA256171_at_NA_illumina     | EST: zr79c08.s1 Soares NhHMPu S1            | 32010.518 |
| 14838 | X17093_at_GI_9665231-S         | HLA CLASS I HISTOCOMPATIBILITY              | 32022.982 |
| 14839 | RC_AA235390_s_at_NA_illumina   | TAP binding protein (tapasin)               | 32050.695 |
| 14840 | J04456_at_GI_6006015-S         | LGALS1 Ubiquinol-cytochrome c               | 32106.174 |
| 14841 | V00572_at_NA_illumina          | PGK1 Phosphoglycerate kinase 1              | 32188.416 |
| 14842 | U57341_r_at_NA_illumina        | Neurofilament triplet L protein mRNA,       | 32202.504 |
| 14843 | U02493_at_GI_34932413-S        | 54 kDa protein mRNA                         | 32218.697 |
| 14844 | RC_D52154_s_at_NA_illumina     | Iduronate 2-sulfatase (Hunter syndrome)     | 32237.49  |
| 14845 | AA195893_at_NA_illumina        | EST: zp97e03.r1 Stratagene muscle           | 32251.541 |
| 14846 | M34376_s_at_GI_20302157-A      | MSMB Beta-microseminoprotein (prostate      | 32278.656 |
| 14847 | M24902_at_GI_6382063-S         | ACPP Acid phosphatase, prostate             | 32364.105 |
| 14848 | RC_AA610082_at_GI_23618862-S   | EST: af08g08.s1 Soares testis NHT Homo      | 32366.719 |
| 14849 | RC_AA496882_s_at_GI_4503516-S  | Eukaryotic translation initiation factor 3, | 32366.809 |
| 14850 | U93205_at_GI_14251208-S        | Nuclear chloride ion channel protein        | 32383.635 |
| 14851 | M95787_at_GI_12621918-S        | 22kDa smooth muscle protein (SM22)          | 32411.31  |
| 14852 | RC_AA426454_s_at_NA_illumina   | Homo sapiens I-1 receptor candidate         | 32457.617 |
| 14853 | U04241_at_GI_39811997-A        | Homolog of Drosophila enhancer of split     | 32527.111 |
| 14854 | AA234533_at_GI_34147489-S      | EST: zr75c08.r1 Soares NhHMPu S1            | 32534.18  |
| 14855 | X68277_at_GI_7108342-S         | Alpha-tubulin mRNA                          | 32550.668 |
| 14856 | T85532_f_at_NA_illumina        | EST: yd78g02.r1 Homo sapiens cDNA           | 32576.686 |
| 14857 | N83169_s_at_NA_illumina        | GUANINE NUCLEOTIDE-BINDING                  | 32589.96  |
| 14858 | RC_AA454180_s_at_GI_4885286-S  | Guanine nucleotide binding protein (G       | 32593.094 |
| 14859 | J03801_f_at_GI_4557893-S       | LYZ Lysozyme                                | 32607.584 |
| 14860 | T55959_s_at_NA_illumina        | TYRO protein tyrosine kinase binding        | 32728.846 |
| 14861 | RC_AA425733_at_NA_illumina     | EST: zv47a10.s1 Soares ovary tumor          | 32809.465 |
| 14862 | AB002313_at_GI_41151474-S      | Human mRNA for KIAA0315 gene, partial       | 32894.6   |
| 14863 | D87953_at_GI_37655182-S        | RTP                                         | 32958.33  |
| 14864 | M60346_s_at_NA_illumina        | ATPase, H+ transporting, lysosomal          | 33036.992 |
| 14865 | M16279_at_GI_34147599-S        | MIC2 Antigen identified by monoclonal       | 33071.188 |
| 14866 | N89302_s_at_NA_illumina        | HLA-B associated transcript-3               | 33072.508 |

|       |                               |                                             |           |
|-------|-------------------------------|---------------------------------------------|-----------|
| 14867 | Y00787_s_at_NA_illumina       | INTERLEUKIN-8 PRECURSOR                     | 33073.4   |
| 14868 | AA365742_s_at_NA_illumina     | EST: EST76593 Pineal gland II Homo          | 33089.56  |
| 14869 | M69066_at_GI_4505256-S        | MSN Moesin                                  | 33104.992 |
| 14870 | X74929_s_at_GI_4504918-S      | KRT8 Keratin 8                              | 33205.21  |
| 14871 | AA059401_at_GI_31982914-S     | EST: zl96c05.r1 Stratagene corneal          | 33213.98  |
| 14872 | M13792_at_GI_4557248-S        | ADA Adenosine deaminase                     | 33219.34  |
| 14873 | N98707_at_GI_42656598-S       | Kinesin family member 5C                    | 33272.625 |
| 14874 | AA092473_at_NA_illumina       | Human heterochromatin protein HP1Hs-        | 33302.05  |
| 14875 | RC_AA598702_at_NA_illumina    | Bone morphogenetic protein 6                | 33424.773 |
| 14876 | L25080_at_NA_illumina         | ARH12 Aplysia ras-related homolog 12        | 33601.617 |
| 14877 | RC_AA281599_at_GI_18105047-S  | Homo sapiens mRNA for for histone H2B,      | 33663.38  |
| 14878 | D50310_at_GI_17738314-S       | CANX Calnexin                               | 33729.594 |
| 14879 | AA215938_at_GI_27544938-S     | Human RNA polymerase III subunit            | 33759.83  |
| 14880 | RC_AA610116_i_at_NA_illumina  | EST: af19g10.s1 Soares total fetus          | 33784.72  |
| 14881 | RC_AA338646_f_at_GI_5031586-S | Homo sapiens mRNA for APCL protein,         | 33816.01  |
| 14882 | X15341_at_GI_17999527-S       | CYTOCHROME C OXIDASE                        | 33875.15  |
| 14883 | X56494_at_GI_33286417-A       | PKM2 Pyruvate kinase, muscle                | 33885.07  |
| 14884 | D31550_at_NA_illumina         | EST: Human fetal-lung cDNA 5'-end           | 33915.332 |
| 14885 | M12529_at_GI_4557324-S        | APOE Apolipoprotein E                       | 34069.684 |
| 14886 | RC_AA176975_s_at_NA_illumina  | Human prostatic secretory protein 57        | 34236.83  |
| 14887 | N56625_at_NA_illumina         | Low density lipoprotein receptor (familial  | 34248.324 |
| 14888 | RC_AA460450_at_NA_illumina    | Fibroblast growth factor receptor 2         | 34252.195 |
| 14889 | N71215_f_at_GI_45505152-S     | KIAA0587 gene product                       | 34252.26  |
| 14890 | M19045_f_at_NA_illumina       | LYZ Lysozyme                                | 34295.406 |
| 14891 | AFFX-                         | AFFX-HUMRGE/M10098_5_at                     | 34346.176 |
| 14892 | AFFX-HUMRGE/M10098_5_at-      | Human 18S rRNA gene, complete. (from        | 34346.176 |
| 14893 | RC_AA010176_at_NA_illumina    | EST: ze17h09.s1 Soares fetal heart          | 34374.555 |
| 14894 | RC_AA279397_at_GI_21464100-S  | EST: zs85d04.s1 NCI_CGAP_GCB1               | 34391.305 |
| 14895 | D28124_at_GI_33519445-A       | Unknown product                             | 34718.14  |
| 14896 | R56183_s_at_NA_illumina       | Eukaryotic translation initiation factor 3, | 34756.12  |
| 14897 | RC_AA428995_at_GI_31563530-S  | H.sapiens mRNA for nuclear protein SA-2     | 34830.387 |
| 14898 | RC_D51292_f_at_NA_illumina    | PEPTIDYL-PROLYL CIS-TRANS                   | 34910.363 |
| 14899 | U29607_at_NA_illumina         | EIF-2-associated p67 homolog mRNA           | 35174.15  |
| 14900 | L19779_at_GI_21328454-S       | Histone H2A.2 mRNA                          | 35203.84  |
| 14901 | RC_AA496904_at_NA_illumina    | EST: ae33d12.s1 Gessler Wilms tumor         | 35323.465 |
| 14902 | RC_AA434390_at_GI_31340713-S  | EST: zw31a06.s1 Soares ovary tumor          | 35344.168 |
| 14903 | D14710_at_GI_23346425-S       | ATP5A1 ATP synthase, H+ transporting,       | 35379.56  |
| 14904 | RC_AA150262_at_NA_illumina    | EST: zl07e02.s1 Soares pregnant uterus      | 35438.13  |
| 14905 | X07730_at_GI_22208991-A       | APS Prostate specific antigen               | 35583.09  |
| 14906 | T89571_f_at_NA_illumina       | EST: ye04h07.r1 Homo sapiens cDNA           | 35803.69  |
| 14907 | U46751_at_GI_19923742-S       | Phosphotyrosine independent ligand p62      | 35815.445 |
| 14908 | X12671_rna1_at_NA_illumina    | Hnrnp a1 protein gene extracted from        | 35861.156 |
| 14909 | AA313977_s_at_GI_6005889-S    | Homo sapiens RNA polymerase II              | 35957.867 |

|       |                                |                                            |           |
|-------|--------------------------------|--------------------------------------------|-----------|
| 14910 | M86400_at_GI_21735623-A        | YWHAZ Tyrosine 3-                          | 36133.08  |
| 14911 | HG3597-HT3800_f_at_NA_illumina | Major Histocompatibility Complex, Class I  | 36155.504 |
| 14912 | R69648_at_NA_illumina          | EST: yi40b02.r1 Homo sapiens cDNA          | 36185.914 |
| 14913 | V00594_at_NA_illumina          | Metallothionein isoform 2                  | 36292.04  |
| 14914 | RC_AA456289_at_NA_illumina     | EST: aa13e06.s1 Soares NhHMPu S1           | 36345.65  |
| 14915 | D13748_at_GI_4503528-S         | EIF4A1 Eukaryotic translation initiation   | 36366.496 |
| 14916 | RC_AA600140_at_NA_illumina     | Deleted in oral cancer-1                   | 36425.62  |
| 14917 | RC_D59322_f_at_NA_illumina     | EST: Human fetal brain cDNA 3'-end GEN-    | 36524.746 |
| 14918 | RC_AA348485_at_NA_illumina     | KIAA0438 gene product                      | 36558.83  |
| 14919 | HG662-HT662_at_NA_illumina     | Epstein-Barr Virus Small Rna-Associated    | 36653.42  |
| 14920 | M24485_s_at_GI_6552334-S       | SAT Spermidine/spermine N1-                | 36723.707 |
| 14921 | HG2915-HT3059_f_at_NA_illumina | Major Histocompatibility Complex, Class I, | 37283.812 |
| 14922 | RC_AA451680_at_GI_29171703-A   | Human DNA sequence from clone 14O9         | 37323.21  |
| 14923 | AA092175_at_GI_7705432-S       | EST: ll4608.seq.F Fetal heart, Lambda      | 37555.805 |
| 14924 | J03464_s_at_NA_illumina        | Collagen, type I, alpha 2                  | 37591.35  |
| 14925 | M12886_at_NA_illumina          | TCRB T-cell receptor, beta cluster         | 37637.94  |
| 14926 | RC_AA252040_at_NA_illumina     | EST: zr64h08.s1 Soares NhHMPu S1           | 37652.94  |
| 14927 | X00437_s_at_NA_illumina        | TCRB T-cell receptor, beta cluster         | 37679.777 |
| 14928 | X53331_at_GI_4505178-S         | MGP Matrix protein gla                     | 37716.215 |
| 14929 | C16248_at_GI_34850063-S        | NADH dehydrogenase (ubiquinone) 1,         | 37827.934 |
| 14930 | M21186_at_GI_4557504-S         | CYBA Cytochrome b-245, alpha               | 37846.004 |
| 14931 | M69043_at_GI_10092618-S        | MAJOR HISTOCOMPATIBILITY                   | 37865.676 |
| 14932 | HG987-HT987_at_NA_illumina     | Mac25                                      | 38002.934 |
| 14933 | HG2917-HT3061_f_at_NA_illumina | Major Histocompatibility Complex, Class I, | 38039.836 |
| 14934 | M57710_at_NA_illumina          | LGALS3 Lectin, galactoside-binding,        | 38288.926 |
| 14935 | RC_AA425296_at_NA_illumina     | EST: zw48c01.s1 Soares total fetus         | 38347.773 |
| 14936 | HG3576-HT3779_f_at_NA_illumina | Major Histocompatibility Complex, Class Ii | 38386.426 |
| 14937 | L19686_rna1_at_GI_4505184-S    | Macrophage migration inhibitory factor     | 38499.14  |
| 14938 | RC_AA167273_at_GI_7662137-S    | KIAA0468 gene product                      | 38823.863 |
| 14939 | X70683_at_GI_30179901-S        | SOX4 SRY (sex determining region Y)-box    | 38882.95  |
| 14940 | X70683_at-2_NA_illumina        | SRY (sex determining region Y)-box 4       | 38882.95  |
| 14941 | W38597_s_at_NA_illumina        | EST: zb20c11.r1 Soares fetal lung          | 39131.938 |
| 14942 | T36219_s_at_NA_illumina        | EST: EST98661 Homo sapiens cDNA 5'         | 39516.785 |
| 14943 | RC_AA479040_at_NA_illumina     | EST: zu36b12.s1 Soares ovary tumor         | 39736.773 |
| 14944 | K02765_at_GI_4557384-S         | COMPLEMENT C3 PRECURSOR                    | 40393.59  |
| 14945 | RC_AA432087_at_NA_illumina     | EST: zw89d03.s1 Soares total fetus         | 40413.22  |
| 14946 | AA010933_s_at_NA_illumina      | EST: ze23a09.r1 Soares fetal heart         | 40456.07  |
| 14947 | AB002304_at_GI_16507207-S      | Human mRNA for KIAA0306 gene, partial      | 40769.555 |
| 14948 | RC_AA449990_at_GI_20302149-S   | Homo sapiens acyl-protein thioesterase     | 40888.633 |
| 14949 | S73591_at_GI_5454161-S         | Brain-expressed HHCPA78 homolog            | 40943.344 |
| 14950 | HG2279-HT2375_at_NA_illumina   | Triosephosphate Isomerase                  | 41014.53  |
| 14951 | RC_AA598732_at_NA_illumina     | EST: ae49g02.s1 Stratagene lung            | 41348.453 |
| 14952 | M63138_at_GI_23110949-S        | CTSD Cathepsin D (lysosomal aspartyl       | 41352.406 |

|       |                                |                                           |           |
|-------|--------------------------------|-------------------------------------------|-----------|
| 14953 | X78262_f_at_NA_illumina        | H.sapiens mRNA for TRE5                   | 41358.703 |
| 14954 | U68105_s_at_GI_4505574-S       | PABPL1 Poly(A)-binding protein-like 1     | 41431.574 |
| 14955 | AA094865_s_at_GI_8922258-S     | EST: cp1877.seq.F Fetal heart, Lambda     | 41640.312 |
| 14956 | RC_AA410714_f_at_GI_24308439-S | EST: zv35h07.s1 Soares ovary tumor        | 41736.383 |
| 14957 | RC_AA488987_s_at_GI_22091455-  | Synaptogyrin 2                            | 41739.008 |
| 14958 | RC_AA450040_s_at_GI_4502228-S  | ADP-ribosylation factor-like 2            | 41917.57  |
| 14959 | L26247_at_NA_illumina          | RPL3 Ribosomal protein L3                 | 41987.895 |
| 14960 | D64142_at_GI_20336759-S        | Histone H1x                               | 42207.418 |
| 14961 | D54949_at_GI_31377794-S        | Calmodulin 1 (phosphorylase kinase,       | 42548.67  |
| 14962 | L11672_at_GI_4508040-S         | ZNF91 Zinc finger protein 91 (HPF7,       | 42625.547 |
| 14963 | AA095867_at_NA_illumina        | EST: l6224.seq.F Fetal heart, Lambda      | 42748.605 |
| 14964 | RC_AA262766_at_NA_illumina     | Zs24d10.s1 NCI_CGAP_GCB1 Homo             | 43328.066 |
| 14965 | M19311_s_at_NA_illumina        | CALM1 Calmodulin 1 (phosphorylase         | 43363.05  |
| 14966 | J03827_at_NA_illumina          | DbpB-like protein mRNA                    | 43484.848 |
| 14967 | AFFX-M27830_M_at_NA_illumina   | AFFX-M27830_M_at (endogenous control)     | 43592.316 |
| 14968 | AFFX-M27830_M_at-2_NA_illumina | Human 28S ribosomal RNA gene,             | 43592.316 |
| 14969 | S54005_s_at_GI_31543813-S      | THYMOSIN BETA-10                          | 43628.887 |
| 14970 | S40719_s_at_GI_24430142-S      | GFAP Glial fibrillary acidic protein      | 44079.566 |
| 14971 | U25789_at_GI_18104947-S        | Ribosomal protein L21 mRNA                | 44238.805 |
| 14972 | U00947_s_at_GI_4504444-A       | HNRPA1 Heterogeneous nuclear              | 44532.74  |
| 14973 | H89133_s_at_GI_21717802-S      | KIAA0618 gene product                     | 44903.508 |
| 14974 | X78136_at_GI_14141165-A        | HnRNP-E2 mRNA                             | 44955.824 |
| 14975 | D63874_at_GI_31982879-S        | HMG1 High-mobility group (nonhistone      | 45051.53  |
| 14976 | AA486335_at_NA_illumina        | EST: ab13a09.r1 Stratagene lung           | 45053.39  |
| 14977 | HG1980-HT2023_at_NA_illumina   | Tubulin, Beta 2                           | 45247.574 |
| 14978 | L20941_at_GI_4503794-S         | FTH1 Ferritin heavy chain                 | 45445.125 |
| 14979 | U15008_at_GI_29294622-A        | SnRNP core protein Sm D2 mRNA             | 46103.523 |
| 14980 | X02152_at_GI_5031856-S         | LDHA Lactate dehydrogenase A              | 46756.836 |
| 14981 | J04164_at_GI_40254449-S        | RPS3 Ribosomal protein S3                 | 46869.312 |
| 14982 | RC_AA459310_r_at_NA_illumina   | EST: zx89d06.s1 Soares ovary tumor        | 46970.582 |
| 14983 | R74226_at_GI_6005716-S         | Homo sapiens mRNA for ATP synthase        | 47227.62  |
| 14984 | L44416_at_NA_illumina          | Human DEAD-box protein p72 (P72)          | 47405.836 |
| 14985 | RC_AA427899_s_at_NA_illumina   | Homo sapiens clone 24703 beta-tubulin     | 47515.418 |
| 14986 | AA056361_at_GI_31560867-S      | EST: ze24f10.r1 Soares fetal heart        | 47694.93  |
| 14987 | RC_AA304344_f_at_NA_illumina   | EST: EST17092 Aorta endothelial cells,    | 47819.805 |
| 14988 | X60489_at_GI_16519563-A        | Elongation factor-1-beta                  | 47955.3   |
| 14989 | RC_AA609988_at_NA_illumina     | EST: af18a06.s1 Soares testis NHT Homo    | 48057.81  |
| 14990 | D00017_at_GI_4757755-S         | ANX2 Annexin II (lipocortin II)           | 48188.016 |
| 14991 | X13839_at_GI_4501882-S         | LCAT Lecithin-cholesterol acyltransferase | 48545.094 |
| 14992 | M33600_f_at_GI_4504410-S       | HLA-DRB1 Major histocompatibility         | 48704.72  |
| 14993 | X15183_at_GI_40254815-S        | 60S RIBOSOMAL PROTEIN L13                 | 49782.13  |
| 14994 | J03191_at_GI_16753213-S        | Profilin mRNA                             | 50043.32  |
| 14995 | RC_AA026962_at_GI_7705430-S    | EST: zk01b09.s1 Soares pregnant uterus    | 50084.816 |

|       |                                |                                            |           |
|-------|--------------------------------|--------------------------------------------|-----------|
| 14996 | N89563_s_at_GI_18152784-S      | EST: HFBEST-40 Human fetal brain           | 50143.426 |
| 14997 | C01286_s_at_GI_31542987-S      | Integral membrane protein 2B               | 51161.12  |
| 14998 | AA263044_s_at_GI_20336745-A    | Histone macroH2A1.2                        | 51270.81  |
| 14999 | D87735_at_GI_16753224-S        | CAG-isl 7 {trinucleotide repeat-containing | 51447.08  |
| 15000 | RC_AA448627_f_at_GI_16554612-S | EST: zx10a05.s1 Soares total fetus         | 51653.684 |
| 15001 | X80909_at_GI_40254826-S        | Alpha NAC mRNA                             | 51824.945 |
| 15002 | X52966_at_GI_16117790-S        | RPL35A Ribosomal protein L35a              | 52295.312 |
| 15003 | M23613_at_GI_40353732-S        | NPM1 Nucleophosmin (nucleolar              | 52440.848 |
| 15004 | N77716_s_at_GI_27894387-S      | Homo sapiens mRNA for low molecular        | 52501.758 |
| 15005 | RC_AA458854_at_NA_illumina     | Homo sapiens pt-wd mRNA for WD-40          | 52560.94  |
| 15006 | RC_AA397825_at_GI_40353726-S   | EST: zt47g02.s1 Soares ovary tumor         | 52686.887 |
| 15007 | X57959_at_GI_15431300-S        | RPL17 Ribosomal protein L7                 | 52755.38  |
| 15008 | Z84721_cds2_at_GI_14043068-S   | Alpha-globin 1 gene extracted from Human   | 52781.926 |
| 15009 | M27891_at_GI_19882253-S        | CST3 Cystatin C (amyloid angiopathy and    | 52932.414 |
| 15010 | HG311-HT311_at_NA_illumina     | Ribosomal Protein L30                      | 53003.816 |
| 15011 | AA084874_f_at_NA_illumina      | Zn13e04.r1 Stratagene hNT neuron           | 53036.75  |
| 15012 | AA464334_s_at_NA_illumina      | EST: zx78f01.r1 Soares ovary tumor         | 53053.9   |
| 15013 | M32405_at_NA_illumina          | Protein kinase (JNK2) mRNA                 | 53183.3   |
| 15014 | RC_AA428594_at_NA_illumina     | EST: zw75g12.s1 Soares testis NHT          | 53270.86  |
| 15015 | X04347_s_at_NA_illumina        | Liver mRNA fragment DNA binding protein    | 53777.758 |
| 15016 | J04988_at_GI_20149593-S        | 90-kDa heat-shock protein gene, cDNA       | 53914.926 |
| 15017 | RC_AA055560_r_at_NA_illumina   | EST: zf21f02.s1 Soares fetal heart         | 54017.016 |
| 15018 | X12447_at_GI_34577109-A        | ALDOA Aldolase A                           | 54563.895 |
| 15019 | Y00433_at_GI_41406081-I        | GPX1 Glutathione peroxidase 1              | 54835.586 |
| 15020 | S71043_rna1_s_at_NA_illumina   | Ig alpha 2=immunoglobulin A heavy chain    | 54850.043 |
| 15021 | M31520_rna1_s_at_NA_illumina   | Unknown protein gene extracted from        | 54973.58  |
| 15022 | Z48950_at_GI_38373691-S        | HISTONE H3.3                               | 55084.074 |
| 15023 | HG2788-HT2896_at_NA_illumina   | Calcyclin                                  | 55642.41  |
| 15024 | HG384-HT384_at_NA_illumina     | Ribosomal Protein L26                      | 56330.445 |
| 15025 | U64661_rna1_f_at_NA_illumina   | Human poly(A)-binding protein processed    | 56796.203 |
| 15026 | Z25749_rna1_at_GI_15431308-S   | Ribosomal protein S7                       | 57392.527 |
| 15027 | D21261_at_GI_4507356-S         | SM22-ALPHA HOMOLOG                         | 58107.465 |
| 15028 | RC_AA463978_at_NA_illumina     | EST: zx86f03.s1 Soares ovary tumor         | 58450.832 |
| 15029 | Z23090_at_GI_4996892-S         | HSPB1 Heat shock 27kD protein 1            | 58573.086 |
| 15030 | RC_AA161292_s_at_NA_illumina   | Interferon, alpha-inducible protein 27     | 58783.84  |
| 15031 | D30930_s_at_GI_42476331-S      | EST: Human fetal-lung cDNA 5'-end          | 59202.58  |
| 15032 | M26880_at_GI_20149305-S        | UBA52 Ubiquitin A-52 residue ribosomal     | 59505.562 |
| 15033 | M14328_s_at_GI_16507965-S      | ENO1 Enolase 1, (alpha)                    | 60116.81  |
| 15034 | M19283_at_GI_11038618-S        | ACTG1 Actin, gamma 1                       | 60326.47  |
| 15035 | HG4542-HT4947_at_NA_illumina   | Ribosomal Protein L10                      | 60797.906 |
| 15036 | M94880_f_at_NA_illumina        | HLA-A MHC class I protein HLA-A (HLA-      | 60813.96  |
| 15037 | X81900_rna1_at_GI_13699820-S   | H.sapiens mRNA for NADH                    | 60829.17  |
| 15038 | M34516_r_at_NA_illumina        | Omega light chain protein 14.1 (Ig lambda  | 61148.266 |

|       |                                |                                             |           |
|-------|--------------------------------|---------------------------------------------|-----------|
| 15039 | J03077_s_at_GI_11386146-S      | PSAP Sulfated glycoprotein 1                | 61242.582 |
| 15040 | U78027_rna3_at_GI_38683866-S   | L44L gene (L44-like ribosomal protein)      | 61255.324 |
| 15041 | RC_AA232549_f_at_GI_45643136-A | EST: zr24c06.s1 Stratagene NT2 neuronal     | 61375.78  |
| 15042 | X69654_at_NA_illumina          | RPS26 Ribosomal protein S26                 | 61436.746 |
| 15043 | RC_AA287268_at_NA_illumina     | EST: zs49h12.s1 NCI_CGAP_GCB1               | 61589.27  |
| 15044 | T95813_f_at_NA_illumina        | Karyopherin alpha 4 (importin alpha 3)      | 62156.152 |
| 15045 | Z48501_s_at_NA_illumina        | Polyadenylate binding protein II            | 62598.383 |
| 15046 | M25079_s_at_NA_illumina        | Sickle cell beta-globin mRNA                | 64256.316 |
| 15047 | M21142_cds2_s_at_GI_18426899-A | Guanine nucleotide-binding protein G-s-     | 64325.35  |
| 15048 | X52851_rna1_at_GI_45439310-I   | Peptidylprolyl isomerase gene extracted     | 64618.004 |
| 15049 | M63379_at_GI_42716296-S        | CLU Clusterin (complement lysis inhibitor;  | 65270.055 |
| 15050 | D32129_f_at_GI_24797066-S      | HLA-A MHC class I protein HLA-A (HLA-       | 65295     |
| 15051 | M33680_at_GI_21237760-S        | 26-kDa cell surface protein TAPA-1 mRNA     | 66270.26  |
| 15052 | HG2815-HT2931_at_NA_illumina   | Myosin, Light Chain, Alkali, Smooth         | 67799.305 |
| 15053 | J03592_at_GI_27764862-S        | ANT3 Adenine nucleotide translocator 3      | 67925.46  |
| 15054 | X64707_at_GI_15431296-A        | 60S RIBOSOMAL PROTEIN L13                   | 68233.22  |
| 15055 | V00599_s_at_NA_illumina        | mRNA fragment encoding beta-tubulin.        | 68955.63  |
| 15056 | W76097_at_NA_illumina          | EST: zd59e04.r1 Soares fetal heart          | 69721.31  |
| 15057 | X69391_at_GI_16753226-S        | RPL6 Ribosomal protein L6                   | 70168.65  |
| 15058 | X56681_s_at_GI_10938013-S      | JunD mRNA                                   | 71077.125 |
| 15059 | M13560_s_at_GI_10835070-S      | PROBABLE PROTEIN DISULFIDE                  | 72669.82  |
| 15060 | X53777_at_GI_14591906-S        | 60S RIBOSOMAL PROTEIN L23                   | 73267.33  |
| 15061 | HG1428-HT1428_s_at_NA_illumina | Globin, Beta                                | 73451.34  |
| 15062 | X51466_at_GI_25453476-S        | EEF2 Eukaryotic translation elongation      | 73735.11  |
| 15063 | J00231_f_at_NA_illumina        | Immunoglobulin gamma 3 (Gm marker)          | 73767.45  |
| 15064 | M26708_s_at_NA_illumina        | PTMA Prothymosin alpha                      | 73768.92  |
| 15065 | M55409_s_at_GI_25453475-S      | EEF1G Translation elongation factor 1       | 74417.29  |
| 15066 | HG658-HT658_f_at_NA_illumina   | Major Histocompatibility Complex, Class I,  | 75165.195 |
| 15067 | M87789_s_at_NA_illumina        | (hybridoma H210) anti-hepatitis A IgG       | 75256.266 |
| 15068 | L20688_at_GI_10835001-S        | GDP-dissociation inhibitor protein (Ly-GDI) | 75410.47  |
| 15069 | T30851_i_at_GI_16753232-S      | Homo sapiens clone 24775 mRNA               | 75633.33  |
| 15070 | U14971_at_GI_14141192-S        | RPS9 Ribosomal protein S9                   | 76271.72  |
| 15071 | X95404_at_GI_5031634-S         | CFL1 Cofilin 1 (non-muscle)                 | 76315.836 |
| 15072 | U58682_at_GI_15011938-S        | RPS28 Ribosomal protein S28                 | 77316.805 |
| 15073 | M11353_at_GI_22027640-S        | EEF1G Translation elongation factor 1       | 77699.766 |
| 15074 | S82297_at_NA_illumina          | BETA-2-MICROGLOBULIN PRECURSOR              | 78590.69  |
| 15075 | RC_AA478305_at_GI_20127579-S   | Homo sapiens chromosome 19, cosmid          | 78768.25  |
| 15076 | M34516_at_NA_illumina          | Omega light chain protein 14.1 (Ig lambda   | 79062.93  |
| 15077 | M14483_rna1_s_at_GI_21359859-S | PTMA gene extracted from Human              | 79342.75  |
| 15078 | RC_AA292427_s_at_GI_37552421-  | EST: zt28g07.s1 Soares ovary tumor          | 79460.54  |
| 15079 | RC_AA448863_at_GI_21359905-S   | EST: zx11d03.s1 Soares total fetus          | 80180.19  |
| 15080 | RC_AA598684_s_at_NA_illumina   | EST: ae49a02.s1 Stratagene lung             | 80766.3   |
| 15081 | D78361_at_GI_34486089-S        | Ornithine decarboxylase antizyme, ORF 1     | 81430.35  |

|       |                              |                                              |           |
|-------|------------------------------|----------------------------------------------|-----------|
| 15082 | X56997_rna1_at_GI_15451941-S | UbA52 gene coding for ubiquitin-52 amino     | 82267.41  |
| 15083 | U12465_at_GI_16117792-S      | RPS11 Ribosomal protein S11                  | 82728.37  |
| 15084 | HG613-HT613_at_NA_illumina   | Ribosomal Protein S12                        | 83250.805 |
| 15085 | M55998_s_at_GI_14719826-S    | Alpha-1 collagen type I gene, 3' end         | 83289.164 |
| 15086 | L11566_at_GI_15431298-S      | RPL18 Ribosomal protein L18                  | 83429.555 |
| 15087 | X00274_at_GI_18641378-S      | HLA CLASS II HISTOCOMPATIBILITY              | 83466.9   |
| 15088 | X79234_at_GI_15431289-S      | Ribosomal protein L11                        | 83523.914 |
| 15089 | K00629_f_at_NA_illumina      | Human kpni repeat mrna (cdna clone pcd-      | 84199     |
| 15090 | S79522_at_GI_27436941-S      | UBA52 Ubiquitin A-52 residue ribosomal       | 84274.42  |
| 15091 | M77232_rna1_at_GI_17158043-S | Ribosomal protein S6 gene and flanking       | 85384.195 |
| 15092 | HG821-HT821_at_NA_illumina   | Ribosomal Protein S13                        | 85962.7   |
| 15093 | L06505_at_GI_15431291-S      | RPL12 Ribosomal protein L12                  | 86563.64  |
| 15094 | M63438_s_at_NA_illumina      | GLUL Glutamate-ammonia ligase                | 87815.47  |
| 15095 | AA285290_at_GI_42475556-S    | Pinin, desmosome associated protein          | 87860.1   |
| 15096 | Z49148_s_at_GI_17105395-S    | Enhancer of rudimentary homolog mRNA         | 88206.336 |
| 15097 | M31520_at_GI_14916502-A      | Ribosomal protein S24                        | 88311.15  |
| 15098 | U14972_at_GI_13904867-S      | Ribosomal protein S10 mRNA                   | 90153.61  |
| 15099 | L19527_at_GI_17017972-S      | RPL27 Ribosomal protein L27                  | 90596.086 |
| 15100 | U03754_f_at_NA_illumina      | Major histocompatibility complex, class I, A | 91467.53  |
| 15101 | HG33-HT33_at_NA_illumina     | Ribosomal Protein S4, X-Linked               | 91478.586 |
| 15102 | M84711_at_GI_15718688-A      | RPS3A Ribosomal protein S3A                  | 92990.79  |
| 15103 | M64716_at_GI_14591916-S      | RPS25 Ribosomal protein S25                  | 93055.87  |
| 15104 | X03689_s_at_NA_illumina      | mRNA fragment for elongation factor TU       | 93206.85  |
| 15105 | Z28407_at_GI_15431304-A      | RPL8 Ribosomal protein L8                    | 93276.35  |
| 15106 | U09953_at_GI_15431302-S      | RPL9 Ribosomal protein L9                    | 93858.664 |
| 15107 | Z19554_s_at_GI_4507894-S     | VIM Vimentin                                 | 93974.81  |
| 15108 | X55954_at_GI_14591907-S      | RPL17 Ribosomal protein L17                  | 94059.89  |
| 15109 | U43901_rna1_s_at_NA_illumina | 37 kD laminin receptor precursor/p40         | 94496.766 |
| 15110 | AB002533_at_GI_16905512-S    | RPLP2 Hemoglobin, beta                       | 94572.89  |
| 15111 | U12404_at_GI_15431287-S      | HSPB1 Heat shock 27kD protein 1              | 95330.1   |
| 15112 | M36072_at_GI_18390348-S      | RPL7A Ribosomal protein L7a                  | 96138.15  |
| 15113 | V00594_s_at_GI_31543214-S    | Metallothionein isoform 2                    | 96228.84  |
| 15114 | U14970_at_GI_13904869-S      | RPS5 Ribosomal protein S5                    | 96419.75  |
| 15115 | U49869_rna1_at_GI_22538474-S | Ubiquitin gene                               | 96607.234 |
| 15116 | RC_AA433930_at_NA_illumina   | EST: zw52e11.s1 Soares total fetus           | 96653.13  |
| 15117 | D14530_at_GI_14790142-S      | 40S RIBOSOMAL PROTEIN S23                    | 97648.54  |
| 15118 | M13934_cds2_at_GI_14141191-S | RPS14 gene (ribosomal protein S14)           | 97745.38  |
| 15119 | L38941_at_GI_16117786-A      | RPL37 Ribosomal protein L37                  | 97880.62  |
| 15120 | T80746_s_at_NA_illumina      | Ferritin, light polypeptide                  | 98754.07  |
| 15121 | D23660_at_GI_16579884-S      | RPL4 Ribosomal protein L4                    | 99190.28  |
| 15122 | X55715_at_GI_15718686-S      | RPS3 Ribosomal protein S3                    | 99372.46  |
| 15123 | HG4319-HT4589_at_NA_illumina | Ribosomal Protein L5                         | 99613.67  |
| 15124 | X62691_at_GI_34335150-S      | 40S RIBOSOMAL PROTEIN S15A                   | 99912.6   |



|       |                                |                                           |            |
|-------|--------------------------------|-------------------------------------------|------------|
| 15125 | M11147_at_GI_20149497-S        | FTL Ferritin, light polypeptide           | 100830.555 |
| 15126 | U14968_at_GI_14141189-S        | Ribosomal protein L27a mRNA               | 101042.19  |
| 15127 | J00105_s_at_GI_37704380-S      | BETA-2-MICROGLOBULIN PRECURSOR            | 101194.92  |
| 15128 | HG2815-HT4023_s_at_NA_illumina | Myosin, Light Chain, Alkali, Smooth       | 101638.28  |
| 15129 | M14199_s_at_NA_illumina        | LAMR1 Laminin receptor (2H5 epitope)      | 102366.54  |
| 15130 | X00351_f_at_NA_illumina        | ACTB Actin, beta                          | 102568.016 |
| 15131 | M81757_at_GI_14591914-S        | 40S RIBOSOMAL PROTEIN S19                 | 103738.28  |
| 15132 | Z26876_at_GI_16306562-S        | LTBP1 Latent transforming growth factor   | 103804.79  |
| 15133 | X98482_r_at_NA_illumina        | TNNT2 gene exon 11                        | 104813.26  |
| 15134 | AFFX-HUMGAPDH/M33197_M_at-     | Glyceraldehyde-3-phosphate                | 104857.29  |
| 15135 | AFFX-                          | AFFX-HUMGAPDH/M33197_M_at                 | 104857.29  |
| 15136 | M24194_at_GI_24475893-S        | Alpha-tubulin mRNA                        | 106025.35  |
| 15137 | D86974_at_NA_illumina          | KIAA0220 gene, partial cds                | 106532.93  |
| 15138 | HG3549-HT3751_at_NA_illumina   | Wilm'S Tumor-Related Protein              | 107410.66  |
| 15139 | X67247_rna1_at_GI_4506742-S    | RpS8 gene for ribosomal protein S8        | 107814.11  |
| 15140 | X80822_at_GI_15431299-S        | 60S RIBOSOMAL PROTEIN L18A                | 108899.98  |
| 15141 | X73460_at_GI_16507968-S        | RPL3 Ribosomal protein L3                 | 109137.6   |
| 15142 | X01677_f_at_NA_illumina        | GAPD Glyceraldehyde-3-phosphate           | 109150.11  |
| 15143 | AFFX-HUMGAPDH/M33197_5_at-     | Glyceraldehyde-3-phosphate                | 110915.77  |
| 15144 | AFFX-                          | AFFX-HUMGAPDH/M33197_5_at                 | 110915.77  |
| 15145 | D13413_rna1_s_at_NA_illumina   | Tumor-associated 120 kDa nuclear protein  | 111183.51  |
| 15146 | D49824_s_at_NA_illumina        | HLA-B null allele mRNA                    | 112857.14  |
| 15147 | X15940_at_GI_15812219-S        | RPL31 Ribosomal protein L31               | 113605.7   |
| 15148 | X63527_at_GI_17158042-S        | GAPD Glyceraldehyde-3-phosphate           | 115907.73  |
| 15149 | HG1800-HT1823_at_NA_illumina   | Ribosomal Protein S20                     | 116314.75  |
| 15150 | X57351_s_at_NA_illumina        | RPS3 Ribosomal protein S3                 | 117447.64  |
| 15151 | X06617_at_GI_34335149-S        | RPS11 Ribosomal protein S11               | 117540.7   |
| 15152 | X16064_at_GI_4507668-S         | TRANSLATIONALLY CONTROLLED                | 118180.82  |
| 15153 | U06155_s_at_NA_illumina        | Chromosome 1q subtelomeric sequence       | 118275.75  |
| 15154 | HG3364-HT3541_at_NA_illumina   | Ribosomal Protein L37                     | 118716.54  |
| 15155 | D79205_at_GI_16306563-S        | Ribosomal protein L39                     | 120515.87  |
| 15156 | M60854_at_GI_34335151-S        | RPS16 Ribosomal protein S16               | 120740.16  |
| 15157 | AFFX-HSAC07/X00351_5_at-       | No info for gene                          | 120969.58  |
| 15158 | AFFX-                          | AFFX-HSAC07/X00351_5_at                   | 120969.58  |
| 15159 | U14969_at_GI_34486095-S        | Ribosomal protein L28 mRNA                | 121198.89  |
| 15160 | HG2873-HT3017_at_NA_illumina   | Ribosomal Protein L30 Homolog             | 121387.51  |
| 15161 | M17733_at_GI_34328943-S        | Thymosin beta-4 mRNA                      | 122027.58  |
| 15162 | X03342_at_GI_15812220-S        | RPL32 Ribosomal protein L32               | 122785.445 |
| 15163 | X69150_at_GI_14165467-S        | Ribosomal protein S18                     | 123570.28  |
| 15164 | M18000_at_GI_14591913-S        | 40S RIBOSOMAL PROTEIN S17                 | 123723.92  |
| 15165 | M17886_at_GI_16905511-S        | RPLP1 Ribosomal protein, large, P1        | 124143.81  |
| 15166 | L04483_s_at_GI_14670385-S      | RPS21 Ribosomal protein S21               | 124330.8   |
| 15167 | X56932_at_GI_14591905-S        | LCAT Lecithin-cholesterol acyltransferase | 125259.87  |

|       |                              |                                            |            |
|-------|------------------------------|--------------------------------------------|------------|
| 15168 | V00478_s_at_NA_illumina      | Actin, beta                                | 128287.52  |
| 15169 | HG3214-HT3391_at_NA_illumina | Metallopanstimulin 1                       | 128366.96  |
| 15170 | AA422123_f_at_NA_illumina    | EST: zv26h12.r1 Soares NhHMPu S1           | 128853.44  |
| 15171 | X17206_at_GI_15055538-S      | PTB Ribosomal protein L26                  | 130544.445 |
| 15172 | J04617_s_at_GI_25453469-S    | EEF1A1 Translation elongation factor 1-    | 131728.66  |
| 15173 | M10277_s_at_NA_illumina      | ACTB Actin, beta                           | 132106.25  |
| 15174 | AFFX-                        | AFFX-HSAC07/X00351_M_at                    | 134239.1   |
| 15175 | AFFX-HSAC07/X00351_M_at-     | No info for gene                           | 134239.1   |
| 15176 | M17885_at_GI_16933547-A      | RPLP0 Ribosomal protein, large, P0         | 134711.11  |
| 15177 | Z70759_at_GI_13518020-A      | Mitochondrial 16S rRNA gene (partial)      | 135113.31  |
| 15178 | U14973_at_GI_13904868-S      | 40S RIBOSOMAL PROTEIN S29                  | 135383.61  |
| 15179 | X80822_f_at_NA_illumina      | Ribosomal protein L18a                     | 136854.22  |
| 15180 | M62895_s_at_NA_illumina      | Annexin II (lipocortin II) pseudogene 2    | 143807.97  |
| 15181 | Z12962_at_GI_10863874-S      | EEF1A1 Translation elongation factor 1-    | 151012.77  |
| 15182 | X01677_s_at_NA_illumina      | Glyceraldehyde-3-phosphate                 | 151981.84  |
| 15183 | AFFX-HUMGAPDH/M33197_3_at-   | Glyceraldehyde-3-phosphate                 | 153333.61  |
| 15184 | AFFX-                        | AFFX-HUMGAPDH/M33197_3_at                  | 153333.61  |
| 15185 | X16869_s_at_NA_illumina      | Eukaryotic translation elongation factor 1 | 156083.53  |
| 15186 | AFFX-HSAC07/X00351_3_at-     | No info for gene                           | 160327.12  |
| 15187 | AFFX-                        | AFFX-HSAC07/X00351_3_at                    | 160327.12  |
| 15188 | U57847_s_at_NA_illumina      | Ribosomal protein S27 (metallopanstimulin  | 163301.72  |
| 15189 | L06499_at_GI_16306561-S      | RPL37A Ribosomal protein L37a              | 163641.64  |
| 15190 | hum_alu_at_NA_illumina       | hum_alu_at (miscellaneous control)         | 187435.39  |
| 15191 | hum_alu_at-2_NA_illumina     | No description for gene: hum_alu_at        | 187435.39  |
